# Supplementary material for: Single-cell roadmap of human gonadal development
Source: Research Square preprint supplement (doi:10.21203/rs.3.rs-496470/v1), 2021-05-21
Supplement: Supplementary file 1 [file 0f874e013bf8d32bd5e379a1.xlsx]

## Sheet: 1_TFIDF_supportingLineage
gene	cluster	geneFrequency	geneFrequencyOutsideCluster	geneFrequencySecondBest	geneFrequencyGlobal	secondBestClusterName	tfidf	idf	qval
UPK3B	coelEpi	0.87	0.0923797672205549	0.84	0.145419821294591	ovarianSurf	1.6774734485677	1.92813040065253	0
KLK11	coelEpi	0.737	0.0639777468706537	0.701	0.10988336402701	ovarianSurf	1.62754348663507	2.20833580276129	0
TNNT1	coelEpi	0.692	0.0568772417831784	0.333	0.100197803696883	ovarianSurf	1.59202143475696	2.30060900976439	0
POSTN	coelEpi	0.58	0.0401141936900666	0.170603674540682	0.076938817270309	FetalLeydig-like	1.48755195725055	2.56474475388026	0
GPC3	coelEpi	0.722	0.0863772783837201	0.385714285714286	0.129731941886638	sLGR5_male	1.47452972872537	2.04228494283293	0
EPS8L1	coelEpi	0.515	0.0314764658516946	0.196	0.0644567219152855	ovarianSurf	1.41200704809893	2.74176125844452	0
RARRES1	coelEpi	0.463	0.0212283141790498	0.086	0.0513607530182116	ovarianSurf	1.37459188361807	2.96888095813837	0
TM4SF1	coelEpi	0.494	0.0319888734353268	0.134	0.0635018075165405	preGC_I	1.36180333287863	2.7566869086612	0
ETS2	coelEpi	0.582	0.0628065295366371	0.213	0.098219766728054	ovarianSurf	1.3505588157403	2.32054779336822	0
TMEM151A	coelEpi	0.468	0.028036014933021	0.334	0.0580451538094264	ovarianSurf	1.33217793884677	2.84653405736489	0
SULT1E1	coelEpi	0.418	0.0146402166752068	0.03	0.0421526498874565	sPAX8e	1.32357933050488	3.16645772848057	0
MSLN	coelEpi	0.562	0.0661737793719347	0.425	0.0999931791828661	ovarianSurf	1.29409115656232	2.30265330349167	0
PCOLCE	coelEpi	0.692	0.118805358319303	0.499	0.157901916649615	sKITLG	1.27728060383721	1.84578121941793	0
SBSPON	coelEpi	0.536	0.0600248883683479	0.394	0.0924902803355842	ovarianSurf	1.27602932054673	2.38065171743792	7.02668275061457e-315
PODXL	coelEpi	0.645	0.101969109142815	0.54	0.139008253188732	ovarianSurf	1.27272817204036	1.97322197215559	0
TFPI2	coelEpi	0.497	0.0480931117780543	0.195	0.0787122297251211	ovarianSurf	1.2633524992185	2.54195673887022	1.04574377732683e-308
LRRN4	coelEpi	0.54	0.064563355537662	0.451	0.0969920196439533	ovarianSurf	1.25988835081054	2.33312657557508	5.94070435542492e-307
RAMP2	coelEpi	0.609	0.0916477563867945	0.234	0.126935406861742	ovarianSurf	1.25702284994127	2.06407692929601	7.61068846778674e-314
LGALS2	coelEpi	0.496	0.0525583778639924	0.2	0.0828047200054566	ovarianSurf	1.23567002630214	2.49127021431882	2.45044311332973e-294
MMP23B	coelEpi	0.54	0.0696874313739843	0.224	0.101766591637678	sPAX8m	1.23393963879426	2.28507340517456	5.26845737072779e-294
COL9A3	coelEpi	0.845	0.188492789693287	0.793	0.233271945979128	Sertoli_WFDC2	1.22994005071996	1.45555035588161	0
EFNB2	coelEpi	0.505	0.0593660786179635	0.19	0.0897619534820271	preGC_I	1.21735000739677	2.410594074053	8.0778224563729e-285
OGN	coelEpi	0.363	0.0120781787570456	0.051	0.0360139144669531	Sertoli_WFDC2	1.20655751451022	3.323849902232	5.30049379920243e-314
ELN	coelEpi	0.377	0.0166898470097357	0.106	0.0412659436600505	ovarianSurf	1.2017695834211	3.18771772790742	1.23421832786746e-302
RERG	coelEpi	0.392	0.0235707488470829	0.146981627296588	0.0487006343359935	FetalLeydig-like	1.18464878365068	3.02206322359868	1.47882157404315e-285
ANXA2	coelEpi	0.711	0.151379840421638	0.631	0.189550508150876	sPAX8m	1.18246392665519	1.66309975619576	1.16498279950605e-307
NPW	coelEpi	0.568	0.0928921748041871	0.303	0.125298410749608	sPAX8m	1.17976843321074	2.07705710072314	1.37003183428749e-270
KRT19	coelEpi	0.893	0.244272015225825	0.902	0.288520564763659	ovarianSurf	1.10998910011086	1.24298891389794	0
FXYD1	coelEpi	0.462	0.0657345728716785	0.248	0.0927631130209399	ovarianSurf	1.09850026773017	2.37770620720817	9.19030248075358e-228
SEMA3D	coelEpi	0.344	0.0216675206793061	0.11	0.0436532296569129	ovarianSurf	1.07722843529708	3.13147800958455	4.11637931397236e-242
MGP	coelEpi	0.737	0.196618109948027	0.625	0.233476570493145	sPAX8m	1.07209440443975	1.45467354740808	2.0620390816418e-268
STK26	coelEpi	0.526	0.1026279188932	0.253	0.13150535434145	ovarianSurf	1.06710025586385	2.02870771076777	1.45553285765786e-214
CD248	coelEpi	0.355	0.0278164116828929	0.1	0.0501330059341109	sKITLG	1.06254186878753	2.99307568672543	2.41634521212368e-229
CLDN15	coelEpi	0.398	0.0461166825269014	0.247	0.0701180001364163	ovarianSurf	1.05771514448942	2.65757573992315	2.45513992723583e-215
FLNC	coelEpi	0.419	0.0562184320327941	0.27	0.0809630993793056	ovarianSurf	1.05326619056668	2.5137617913286	6.5598681264508e-210
PKHD1L1	coelEpi	0.305	0.0116389722567894	0.099	0.0316485915012618	ovarianSurf	1.05318379828216	3.45306163371201	5.78667630380118e-250
LITAF	coelEpi	0.583	0.134689993411902	0.382	0.165268399154219	ovarianSurf	1.04950754316597	1.80018446512174	4.44392678092805e-214
SLC6A13	coelEpi	0.362	0.0352829221872484	0.173	0.0575676966100539	sPAX8e	1.03343531626592	2.85479369134231	1.36761545069237e-211
TSPAN4	coelEpi	0.558	0.1291999121587	0.323	0.158447582020326	ovarianSurf	1.02802095086766	1.84233145316786	5.47650487095666e-201
TPM2	coelEpi	0.859	0.261840275236074	0.684	0.302571448059477	ovarianSurf	1.02688110238502	1.19543783746801	2.78199456626139e-314
CDC42EP1	coelEpi	0.643	0.170704926432911	0.41	0.202919309733306	ovarianSurf	1.02555083609734	1.59494686795853	9.9009237230466e-217
PLS3	coelEpi	0.507	0.106946782812386	0.242	0.134233681195007	granulosa	1.01814376592132	2.00817310832607	8.79318121190925e-192
CCDC80	coelEpi	0.572	0.139301661664593	0.271	0.168815224063843	sPAX8e	1.01755969225509	1.77895051093547	1.39558951310929e-198
CAVIN1	coelEpi	0.487	0.0981626528072616	0.367	0.124684537207557	ovarianSurf	1.01391862732107	2.08196843392417	4.54643250243821e-189
KLK5	coelEpi	0.27	0.00644169533709099	0.065	0.0244185253393357	ovarianSurf	1.00235156387514	3.71241319953756	1.34710064254566e-245
CYTL1	coelEpi	0.638	0.176341409852866	0.455	0.207830298069709	sKITLG	1.00231931363573	1.57103340695256	1.16277945796391e-205
MFAP4	coelEpi	0.612	0.167850084181246	0.699	0.198144737739581	sKITLG	0.990679600191179	1.61875751665225	9.40763191103456e-195
TNFAIP8	coelEpi	0.386	0.0543884049483932	0.202	0.0770070254416479	ovarianSurf	0.989649428010401	2.5638586217886	1.16485135934948e-184
LY6H	coelEpi	0.573	0.151453041505014	0.482	0.180205988677444	sLGR5_female	0.981924143590484	1.71365470085599	8.13782385859809e-184
DCN	coelEpi	0.854	0.277798111412049	0.498	0.317099788554669	preGC_IIc	0.980852104667519	1.14853876424768	2.10532464536574e-290
PLAC9	coelEpi	0.307	0.0225459336798185	0.106	0.0419480253734397	ovarianSurf	0.973596442866446	3.17132391813175	1.82605607369781e-200
BNC1	coelEpi	0.386	0.0584876656174511	0.368	0.0808266830366278	ovarianSurf	0.970962979094447	2.51544813236903	6.02321226495733e-176
TRNP1	coelEpi	0.462	0.100358685308543	0.242	0.125025578064252	ovarianSurf	0.960607465401535	2.07923693809856	8.73457505518508e-166
CAPN6	coelEpi	0.297	0.0205695044286655	0.072	0.0394243230338995	ovarianSurf	0.960311578227968	3.23337231726589	4.46551930726361e-198
GNG11	coelEpi	0.475	0.114266891149989	0.332	0.138871836846054	ovarianSurf	0.937746808927229	1.97420380826785	2.23165807007761e-156
OLFML3	coelEpi	0.415	0.0828636263816705	0.236220472440945	0.105518041061319	FetalLeydig-like	0.933282434176557	2.2488733353652	7.05287284936846e-156
ASPHD1	coelEpi	0.363	0.0557060244491618	0.334	0.0766659845849533	ovarianSurf	0.93229186744092	2.56829715548463	2.86647126274999e-162
COL1A1	coelEpi	0.935	0.328014054608008	0.712	0.369415455971625	sPAX8e	0.931104202208654	0.995833371346154	0
SLC9A3R1	coelEpi	0.681	0.226191347631945	0.615	0.257213014119091	ovarianSurf	0.924696318991017	1.35785068867991	9.35329880190122e-186
CDH11	coelEpi	0.565	0.168435692848254	0.419	0.195484619057363	ovarianSurf	0.922234571315833	1.63227357755015	2.99338142775852e-158
ID1	coelEpi	0.525	0.148305394919845	0.403571428571429	0.173999045085601	sLGR5_male	0.918070370593138	1.74870546779645	1.4806868242199e-151
CRIP1	coelEpi	0.39	0.0734206866261621	0.595	0.0950139826751245	ovarianSurf	0.917955172741799	2.35373121215846	1.12812126919556e-151
KLK10	coelEpi	0.303	0.0297928409340458	0.217	0.0484278016506377	ovarianSurf	0.91738740841858	3.0276812159029	2.43951776603935e-172
LURAP1L	coelEpi	0.404	0.0817656101310299	0.24	0.103744628606507	sPAX8m	0.915392449046305	2.26582289367897	4.08013782281108e-149
TPBG	coelEpi	0.477	0.123856233072249	0.244	0.147943523634131	preGC_I	0.911511070028133	1.91092467511139	1.0546251776725e-145
SERTAD4-AS1	coelEpi	0.305	0.0333064929360955	0.152	0.0518382102175841	Sertoli_WFDC2	0.902686464560656	2.95962775265789	3.55021013516394e-164
NRP2	coelEpi	0.413	0.0915013542200425	0.222	0.113430188936635	sKITLG	0.898922462885824	2.17656770674534	1.7906999992563e-141
TMEM235	coelEpi	0.247	0.0101749505892687	0.125	0.0263283541368256	ovarianSurf	0.898365877668938	3.63710881647343	1.19528069096144e-194
CRABP1	coelEpi	0.286	0.0267183954322524	0.183	0.0444035195416411	sPAX8m	0.890728851506693	3.1144365437297	6.73434187424636e-166
EMILIN1	coelEpi	0.328	0.0471414976941659	0.171428571428571	0.0662983425414365	sLGR5_male	0.890057645124727	2.71359038147783	7.292185182498e-151
ALDH1A2	coelEpi	0.755	0.274943269160384	0.681	0.307687060909897	ovarianSurf	0.889897396640051	1.17867204852987	1.85225437386527e-198
REC8	coelEpi	0.69	0.245882439060098	0.69	0.276174885751313	ovarianSurf	0.887837469235211	1.2867209699061	9.89213787804475e-174
RSPO3	coelEpi	0.236	0.0077593148378596	0.0321428571428571	0.0233271945979128	sLGR5_male	0.886919965934656	3.75813544887566	2.22970237791557e-197
GFRA1	coelEpi	0.347	0.058194861283947	0.258	0.077893731669054	sLGR5_female	0.885686199115641	2.55240979572231	1.97090570560548e-144
BICDL1	coelEpi	0.317	0.043115438108484	0.289	0.0617966032330673	ovarianSurf	0.882498480926805	2.78390687989529	1.93666753262049e-150
SPATS2L	coelEpi	0.597	0.201156577117341	0.516	0.228156333128709	sPAX8m	0.882201355385434	1.47772421337594	5.20912447010197e-148
PRRX1	coelEpi	0.459	0.127223482907547	0.347	0.149853352431621	sKITLG	0.871227034121127	1.89809811355365	3.35196734914259e-129
TPM1	coelEpi	0.8	0.305394919844814	0.596	0.339131027897142	ovarianSurf	0.86509498664613	1.08136873330766	4.96392867368672e-209
ENTPD2	coelEpi	0.226	0.00680770075397116	0.072	0.0217584066571175	ovarianSurf	0.865072648792673	3.82775508315342	1.03255215853832e-192
APLP1	coelEpi	0.296	0.0365273406046409	0.183	0.0542254962144465	ovarianSurf	0.862722805100044	2.91460407128393	6.23564285646236e-148
ALCAM	coelEpi	0.54	0.178025034770515	0.537	0.202714685219289	ovarianSurf	0.861816121254332	1.59595578010061	3.11550861313666e-131
PLPP1	coelEpi	0.442	0.121294195154088	0.217	0.143168951640407	ovarianSurf	0.859128600823993	1.94372986611763	2.2373602950866e-124
PDPN	coelEpi	0.539	0.178683844520899	0.382	0.203260350590001	ovarianSurf	0.858771239870521	1.59326760643881	5.93659290381609e-130
AC109466.1	coelEpi	0.248	0.0162506405094795	0.08	0.0320578405292954	sKITLG	0.853172945826072	3.44021349123416	1.9540369124371e-166
NR2F1	coelEpi	0.249	0.0168362491764878	0.110236220472441	0.0326717140713457	FetalLeydig-like	0.85189015154331	3.42124558852735	4.48059196675727e-165
TMEM88	coelEpi	0.24	0.0133225971744382	0.08	0.0287838483050269	ovarianSurf	0.851505809256541	3.54794087190225	3.9851208285031e-171
MEIS1	coelEpi	0.421	0.112144059732084	0.269	0.133210558624923	sPAX8e	0.848662011380927	2.01582425506159	1.00971923054131e-120
PTGS1	coelEpi	0.552	0.193324061196106	0.533	0.217788691085192	sPAX8m	0.841374956259362	1.52422999322348	4.80495926612156e-125
CELF2	coelEpi	0.354	0.0753239147939389	0.345	0.0943319009617352	Sertoli_WFDC2	0.835771292412821	2.36093585427351	9.93475070116296e-122
CRYAB	coelEpi	0.418	0.115657711734134	0.605	0.136279926335175	sPAX8m	0.833092486773042	1.99304422672977	9.92513023342278e-115
OLFML1	coelEpi	0.301	0.0456774760266452	0.109	0.0630925584885069	ovarianSurf	0.831708886976178	2.76315244842584	8.40229066779221e-132
AATF	coelEpi	0.564	0.205036234536271	0.362	0.229520496555487	ovarianSurf	0.830074300336722	1.47176294385944	1.47729541779649e-122
SELENBP1	coelEpi	0.534	0.187687577776151	0.382	0.211308914807994	preGC_I	0.830067844089415	1.55443416496145	1.42829520921036e-118
ANXA3	coelEpi	0.32	0.0576092526169387	0.222	0.0755064456721915	ovarianSurf	0.826731921033481	2.58353725322963	1.6697418461055e-124
COL8A1	coelEpi	0.216	0.00761291267110753	0.053	0.0218266148284565	sPAX8m	0.82611904107121	3.82462519014449	2.18864601219681e-176
TSHZ2	coelEpi	0.499	0.16850889393163	0.404	0.191051087920333	sPAX8m	0.8259519909284	1.65521441067816	9.73984285916745e-114
AEBP1	coelEpi	0.494	0.165727252763341	0.349	0.188118136552759	ovarianSurf	0.825318453026999	1.67068512758502	3.74648408484784e-113
RAB33A	coelEpi	0.292	0.0423834272747237	0.252	0.0594093172362049	ovarianSurf	0.824404829053042	2.82330420908576	2.56886732870941e-131
SCTR	coelEpi	0.205	0.004318863919186	0.037	0.0180069572334766	ovarianSurf	0.823484401972349	4.01699708279195	5.06449671912366e-188
HMGA2	coelEpi	0.411	0.114632896566869	0.546428571428571	0.134847554737058	sLGR5_male	0.823483859097503	2.00361036276765	2.57736388554548e-111
LINC02381	coelEpi	0.49	0.165288046263085	0.483	0.18743605483937	ovarianSurf	0.820415590972052	1.67431753259602	4.44910195610125e-111
BMP4	coelEpi	0.379	0.0954542127223483	0.246	0.114794352363413	sKITLG	0.820388323872287	2.16461299174746	2.35037345008642e-112
PTGER3	coelEpi	0.203	0.00475807041944221	0.03	0.0182797899188323	Sertoli_WFDC2	0.812397718701764	4.00195920542741	3.91394139485009e-182
CRIP2	coelEpi	0.693	0.281970573164483	0.73	0.31000613873542	ovarianSurf	0.811616083273393	1.17116317932669	6.26467778304103e-145
FHL1	coelEpi	0.436	0.135202400995535	0.402	0.155719255166769	ovarianSurf	0.810829435182092	1.85970053940847	6.52423223430955e-106
ST3GAL1	coelEpi	0.439	0.13769123783032	0.382	0.158242957506309	ovarianSurf	0.809350813641002	1.84362372127791	2.3391540456239e-105
HOXA7	coelEpi	0.276	0.0371129492716492	0.131	0.0534069981583794	sPAX8e	0.808628523225499	2.92981348994746	1.13475010555048e-129
LTBP4	coelEpi	0.508	0.181685088939316	0.324	0.20394243230339	ovarianSurf	0.807678099933195	1.58991751955353	9.57684360414911e-108
MYRF	coelEpi	0.617	0.245516433643218	0.632	0.270854648386877	ovarianSurf	0.805908713115927	1.30617295480701	3.57727498805653e-123
GPC4	coelEpi	0.281	0.0406998023570749	0.161	0.0570902394106814	sPAX8m	0.80453731444111	2.86312211544879	5.91467824141241e-126
CYBRD1	coelEpi	0.293	0.0479467096113022	0.145	0.0646613464293022	ovarianSurf	0.80240736331919	2.73859168368324	4.1952694459669e-121
SEMA3B	coelEpi	0.418	0.127296683990923	0.415	0.147125025578064	ovarianSurf	0.801085521531527	1.91647253954911	1.39056495981631e-102
COL5A2	coelEpi	0.371	0.0968450333064929	0.16	0.115544642248141	sKITLG	0.800654473279444	2.15809831072627	1.99173602133101e-105
ISLR	coelEpi	0.446	0.146255764585316	0.398	0.166700770752336	sLGR5_female	0.799033470078463	1.79155486564678	1.3514683567308e-101
MEIS2	coelEpi	0.638	0.261035063318937	0.546428571428571	0.286747152308847	sLGR5_male	0.796960541614628	1.24915445394142	1.54915634699014e-124
SPRY1	coelEpi	0.51	0.188053583193031	0.545	0.210012959552554	sPAX8m	0.79589887938702	1.56058603801376	1.13328580925194e-103
SMTNL2	coelEpi	0.355	0.0882073054681209	0.317857142857143	0.106404747288725	sLGR5_male	0.795379305421612	2.24050508569468	2.95431186682455e-105
RBPMS	coelEpi	0.517	0.193690066612986	0.519	0.215742445945024	ovarianSurf	0.792907370681062	1.53366996263262	2.99081398806369e-103
IGF1	coelEpi	0.246	0.0249615694312276	0.113	0.0400381965759498	ovarianSurf	0.791608656063101	3.21792136611017	9.94338384510883e-135
RARRES2	coelEpi	0.577	0.229997803967499	0.583	0.253666189209467	ovarianSurf	0.791491725091613	1.37173609201319	1.76529868803144e-110
LTC4S	coelEpi	0.297	0.0533635897811288	0.226	0.0699815837937385	sPAX8m	0.789878378581642	2.65952316020755	1.83846538308216e-114
FLRT2	coelEpi	0.391	0.114413293316741	0.253	0.133278766796262	sKITLG	0.787987130154195	2.01531235333554	6.33826343134241e-99
CA9	coelEpi	0.341	0.0815460068809018	0.528	0.0992428892981379	ovarianSurf	0.787773087159441	2.31018500633267	2.88695000157015e-104
TMEM37	coelEpi	0.338	0.0801551862967572	0.243	0.0977423095286815	preGC_I	0.785992216241211	2.32542075811009	4.8706971208788e-104
MMEL1	coelEpi	0.239	0.0226191347631945	0.154	0.0373780778937317	ovarianSurf	0.785514344858669	3.28667089899025	2.14650337456416e-135
AC245041.2	coelEpi	0.208	0.00936973867213235	0.098	0.0229179455698793	ovarianSurf	0.785373685402812	3.77583502597506	1.07749576820115e-157
CNTN4	coelEpi	0.463	0.16316521484518	0.33	0.18361639724439	preGC_IIb	0.784741707265398	1.69490649517365	8.5186698366994e-97
PMP22	coelEpi	0.782	0.33665178244638	0.676	0.367028169974763	sPAX8m	0.783811640982997	1.00231667644884	1.86452526892608e-167
ANXA11	coelEpi	0.462	0.164336432179196	0.446	0.184639519814474	ovarianSurf	0.780479652101671	1.68934989632396	3.05631498779805e-95
NET1	coelEpi	0.521	0.201815386867726	0.337	0.223586385649001	Sertoli_WFDC2	0.780435819276569	1.49795742663449	3.33796551929837e-99
GALNT9	coelEpi	0.26	0.034404509186736	0.217	0.0497919650774163	ovarianSurf	0.779974429466915	2.99990165179583	1.30558826075555e-122
PRICKLE1	coelEpi	0.35	0.09062294121953	0.156	0.108314576086215	sPAX8m	0.777950440445914	2.22271554413118	4.10395018856675e-99
FRMD4B	coelEpi	0.523	0.204743430202767	0.483	0.226451128845236	Sertoli_WFDC2	0.776773262866503	1.48522612402773	4.02529129759671e-98
TNNI1	coelEpi	0.364	0.100871092892175	0.362	0.11881863447241	sPAX8e	0.775377158383397	2.13015702852582	1.87171493020895e-96
FKBP11	coelEpi	0.319	0.0716638606251373	0.163	0.0885342063979265	ovarianSurf	0.773372846087079	2.42436628867423	1.98083511301741e-102
HSPB7	coelEpi	0.272	0.0429690359417319	0.216	0.0585908191801378	ovarianSurf	0.77171221579549	2.83717726395401	2.8355081527022e-114
CEBPB	coelEpi	0.373	0.108410804479906	0.284	0.12645794966237	ovarianSurf	0.771306349050049	2.06784543981246	4.78475959948589e-94
HMGA1	coelEpi	0.377	0.111412048898324	0.471428571428571	0.129527317372621	sLGR5_male	0.770536530122494	2.04386347512598	2.02555393364638e-93
GJB2	coelEpi	0.178	0.00124441841739258	0.004	0.0133005934110906	ovarianSurf	0.768950499672664	4.31994662737452	8.52630514235367e-189
LRRN3	coelEpi	0.48	0.18161188785594	0.768	0.201964395334561	sLGR5_female	0.767838651761603	1.59966385783667	1.43425274290272e-91
PLEKHN1	coelEpi	0.175	0.000585608667008272	0.004	0.0124820953550235	ovarianSurf	0.767105505791948	4.38346003309684	1.98944080387932e-195
NGF	coelEpi	0.256	0.0351365200204963	0.126	0.0502012141054498	ovarianSurf	0.765879313205603	2.99171606720939	1.05388725669865e-117
SEMA3C	coelEpi	0.422	0.144352536417539	0.305	0.16329036218539	Sertoli_WFDC2	0.764759076524186	1.81222529982035	3.16137842867809e-89
VAMP8	coelEpi	0.394	0.125393455823146	0.26	0.143714617011118	ovarianSurf	0.764330754220826	1.93992577213408	5.36883067535872e-90
TGFB1I1	coelEpi	0.332	0.084034843715687	0.246	0.100948093581611	ovarianSurf	0.761325407967794	2.2931488191801	2.59208446445439e-95
DSC3	coelEpi	0.222	0.0185930751775126	0.09	0.032467089557329	sPAX8m	0.760911289638919	3.42752833170684	9.57905549661912e-133
CNN2	coelEpi	0.518	0.209355098455457	0.494	0.230407202782893	sPAX8m	0.760375871879529	1.46790708857052	6.88729204707078e-92
PDZK1IP1	coelEpi	0.272	0.0458970792767733	0.172	0.0613191460336948	ovarianSurf	0.759332377198927	2.79166315146664	7.98514056635501e-109
CSRP1	coelEpi	0.752	0.337456994363517	0.566	0.365732214719323	sLGR5_female	0.756402108091055	1.00585386714236	2.60623646350991e-144
RGS10	coelEpi	0.354	0.102920723226704	0.637	0.12004638155651	ovarianSurf	0.750436492658748	2.11987709790607	3.6153984773088e-88
ANXA1	coelEpi	0.262	0.0428958348583559	0.296	0.0578405292954096	ovarianSurf	0.746717174138347	2.85006555014636	9.19266922067336e-107
GATA2	coelEpi	0.184	0.00534367908645048	0.013	0.0175295000341041	sPAX8e	0.74407209859192	4.04387010104305	1.46059602059555e-156
CDC42EP3	coelEpi	0.397	0.13695922699656	0.46	0.154696132596685	sPAX8m	0.740918130872977	1.86629252109062	1.79189914161651e-81
CPNE2	coelEpi	0.263	0.045165068443013	0.211	0.0600231907782552	ovarianSurf	0.739825385236561	2.81302427846601	2.04905470713611e-103
PCOLCE2	coelEpi	0.236	0.0295732376839177	0.07	0.0436532296569129	sKITLG	0.739028810261953	3.13147800958455	4.61638184819486e-114
CYR61	coelEpi	0.723	0.333650538027963	0.56	0.36020735284087	preGC_IIb	0.738237538226253	1.02107543323133	5.21656216740421e-127
IGFBP7	coelEpi	0.768	0.354878852207013	0.844	0.383057090239411	sPAX8m	0.73695071249865	0.959571240232617	3.20788653099386e-143
COL6A2	coelEpi	0.665	0.306712539345582	0.54	0.331150671850488	preGC_I	0.734945900466538	1.10518180521284	9.581903773704e-109
GPNMB	coelEpi	0.171	0.00212283141790498	0.007	0.0136416342677853	sPAX8m	0.734381528115729	4.29462881939023	1.08854725818008e-169
ADAM33	coelEpi	0.204	0.0144938145084547	0.087	0.0274196848782484	ovarianSurf	0.733684795853126	3.59649409731924	1.49319080515728e-130
SSBP2	coelEpi	0.473	0.195886099114267	0.383	0.214787531546279	sPAX8e	0.727524121368014	1.53810596483724	2.05212210764134e-77
VASN	coelEpi	0.588	0.269306785740429	0.572	0.291044267103199	ovarianSurf	0.725756582817156	1.23427990275026	2.21102257916076e-89
LINC01139	coelEpi	0.188	0.00900373325525218	0.023	0.0212127412864061	preGC_IIb	0.724392815466698	3.85315327375903	6.39846243530736e-139
COL18A1	coelEpi	0.623	0.291267110753239	0.736	0.313894004501739	Sertoli_WFDC2	0.72187004725866	1.15869991534295	1.44562804658497e-94
EFEMP2	coelEpi	0.681	0.323841592855574	0.61	0.348202714685219	ovarianSurf	0.718434880086198	1.0549704553395	4.04553448015016e-107
MST1	coelEpi	0.385	0.138642851914208	0.236	0.155446422481413	sPAX8m	0.716659850326643	1.86145415669258	1.29013395816988e-73
ADAM15	coelEpi	0.3	0.0773735451284679	0.266	0.0925584885069231	ovarianSurf	0.713974357831019	2.3799145261034	6.35344238652529e-83
PYCR1	coelEpi	0.388	0.142815313666642	0.368	0.159538912761749	sKITLG	0.712161358709385	1.83546741935409	6.16099221278158e-72
FRAS1	coelEpi	0.388	0.143547324500403	0.269	0.160220994475138	preGC_I	0.710506066096388	1.83120120127935	2.24754783940778e-71
CAPG	coelEpi	0.356	0.120269379986824	0.199	0.136348134506514	preGC_IIb	0.70934561111188	1.99254385143786	3.72081734886552e-73
ITM2A	coelEpi	0.248	0.0434082424419881	0.1	0.0573630720960371	ovarianSurf	0.708871922439398	2.85835452596532	1.91528283900581e-95
TMEM173	coelEpi	0.329	0.100358685308543	0.262	0.115953891276175	preGC_I	0.708851113789112	2.15456265589396	4.57171341038301e-76
DES	coelEpi	0.44	0.182343898689701	0.542	0.199918150194393	sKITLG	0.708332787900044	1.60984724522737	5.67053146803143e-70
COL5A1	coelEpi	0.262	0.0529243832808726	0.125	0.0671850487688425	sKITLG	0.707479790728738	2.70030454476618	4.42260403330639e-90
KLK8	coelEpi	0.16	0.00131761950076861	0.01	0.0121410544983289	ovarianSurf	0.705786021703389	4.41116263564618	2.43672761587584e-166
COL9A2	coelEpi	0.244	0.0416514164409633	0.233	0.0554532432985472	Sertoli_WFDC2	0.705700478639271	2.89221507639045	1.37804883415152e-95
C2orf40	coelEpi	0.529	0.244198814142449	0.51	0.263624582224951	ovarianSurf	0.705278259980957	1.33322922491674	1.47710187843006e-74
PLAT	coelEpi	0.351	0.118439352902423	0.355	0.134301889366346	sPAX8m	0.704690452661998	2.00766510729914	5.25370432718998e-72
FMOD	coelEpi	0.324	0.0982358538906376	0.314	0.113634813450651	sPAX8m	0.704623977680518	2.17476536321148	2.96076915651131e-75
HHIP-AS1	coelEpi	0.33	0.102920723226704	0.29	0.118409385444376	ovarianSurf	0.70409040593693	2.13360729071797	3.16815031413625e-74
SERPING1	coelEpi	0.854	0.408096039821389	0.712	0.438510333537958	sLGR5_female	0.704013604134277	0.824371901796578	1.72425639167714e-172
EFNA1	coelEpi	0.482	0.213893565624771	0.372	0.232180615237705	granulosa	0.70383553359009	1.460239696245	3.62199179907296e-70
PIK3R1	coelEpi	0.41	0.164336432179196	0.271	0.18109269490485	sPAX8e	0.700585963427512	1.70874625226223	2.13386366716437e-67
TIMP3	coelEpi	0.602	0.291340311836615	0.633	0.312529841074961	ovarianSurf	0.700159304400744	1.16305532292482	3.03666594221313e-83
SLC9A3R2	coelEpi	0.372	0.137910841080448	0.268	0.153877634540618	sPAX8m	0.696234297275157	1.87159757332031	2.0064184364637e-67
BNC2	coelEpi	0.411	0.167337676597614	0.338	0.183957438101085	ovarianSurf	0.695843904610198	1.69305086279853	7.83616796095722e-66
CLIC3	coelEpi	0.251	0.0492643291120709	0.387	0.063024350317168	ovarianSurf	0.693822762688442	2.76423411429658	4.96841045964886e-88
NELL2	coelEpi	0.253	0.0506551496962155	0.259	0.0644567219152855	ovarianSurf	0.693665598386464	2.74176125844452	2.71017274800365e-87
PTK7	coelEpi	0.619	0.305394919844814	0.457142857142857	0.326785348884796	sLGR5_male	0.692321632665133	1.11845174905514	8.20864513033396e-84
HHIP	coelEpi	0.282	0.0716638606251373	0.283	0.0860105040583862	ovarianSurf	0.691826609692483	2.45328584997334	2.06071280650464e-78
ID2	coelEpi	0.558	0.270551204157822	0.471428571428571	0.290157560875793	sLGR5_male	0.69043080411937	1.23733119017808	2.91801949629261e-73
SERPINE3	coelEpi	0.154	0.000878413000512408	0.0078740157480315	0.0113225564422618	FetalLeydig-like	0.690067593227585	4.48095839758172	2.53234363864029e-165
BGN	coelEpi	0.391	0.15540590000732	0.322	0.171475342746061	sKITLG	0.689456476544136	1.76331579678807	3.01921111757339e-64
COL16A1	coelEpi	0.278	0.0701266378742405	0.261	0.084305299774913	Sertoli_WFDC2	0.687580332321935	2.47331054792063	9.57876412746974e-78
BCHE	coelEpi	0.206	0.0230583412634507	0.0918635170603675	0.0355364572675807	FetalLeydig-like	0.687462405702089	3.3371961441849	2.57056788003607e-105
SMOC2	coelEpi	0.205	0.0225459336798185	0.112	0.0349907918968692	sPAX8m	0.687297419857336	3.35267034076749	8.09450775974922e-106
CREB3L1	coelEpi	0.415	0.176414610936242	0.377	0.192688084032467	sKITLG	0.683373255078455	1.64668254235772	8.85698636751982e-62
CLEC11A	coelEpi	0.602	0.300929653758876	0.507	0.32146511152036	sKITLG	0.683189487926749	1.13486625901453	1.10264396899126e-77
KLK6	coelEpi	0.189	0.0152990264255911	0.049	0.0271468521928927	ovarianSurf	0.681627400143573	3.60649418065383	1.39655502878509e-113
FGF7	coelEpi	0.194	0.0180074665105044	0.038	0.0300115953891276	sKITLG	0.680197263051036	3.50617145902596	2.87547465655942e-109
SMPD3	coelEpi	0.209	0.0261327867652441	0.089	0.0386058249778323	ovarianSurf	0.680159590516632	3.25435210773508	3.85095532270302e-100
FHL3	coelEpi	0.325	0.109508820730547	0.332142857142857	0.124207080008185	sLGR5_male	0.677886659518463	2.08580510621066	1.13359211378268e-65
FLRT3	coelEpi	0.536	0.264036307737355	0.558	0.282586453857172	sLGR5_female	0.677381118709423	1.26377074386086	1.87862141770154e-66
IGFBP5	coelEpi	0.744	0.377790791303711	0.77	0.40276925175636	granulosa	0.676587244236261	0.909391457306802	1.09149506430537e-111
NEO1	coelEpi	0.386	0.157894736842105	0.28	0.17345337971489	ovarianSurf	0.676212718319232	1.75184642051615	3.76002873917323e-60
GSTM5	coelEpi	0.217	0.0321352756020789	0.12	0.0447445603983357	sPAX8e	0.674172431147736	3.10678539699418	2.61903104748224e-93
NXPH2	coelEpi	0.222	0.0357221286875046	0.098	0.0484278016506377	sLGR5_female	0.672145229930445	3.0276812159029	4.27784040589557e-90
HAND2-AS1	coelEpi	0.251	0.0554132201156577	0.15	0.0687538367096378	ovarianSurf	0.671982907064045	2.67722273730695	3.84144550475838e-79
TEAD3	coelEpi	0.27	0.0701266378742405	0.189285714285714	0.0837596344042016	sLGR5_male	0.669547100852418	2.47980407723118	7.16337349643806e-73
TCF21	coelEpi	0.264	0.0658809750384306	0.299	0.0793943114385103	ovarianSurf	0.668798739218777	2.53332855764688	3.88350931272462e-74
CTGF	coelEpi	0.432	0.19749652294854	0.392	0.21349157629084	sPAX8m	0.667076213838556	1.54415790240407	9.15726518197906e-57
MDFI	coelEpi	0.507	0.251079715979797	0.441	0.268535570561353	sPAX8m	0.666589350762225	1.31477189499453	2.59344373902205e-60
TGFB3	coelEpi	0.197	0.0220335260961862	0.061	0.0339676693267853	preGC_I	0.666322183455981	3.38234610891361	1.91319619467378e-100
PTGIS	coelEpi	0.252	0.058121660200571	0.202	0.071345747220517	ovarianSurf	0.665334820410976	2.6402175413134	3.33516327971517e-76
ID4	coelEpi	0.526	0.265134323987995	0.581	0.282927494713867	sPAX8m	0.664108988325733	1.26256461658885	2.62484380901022e-61
TMED3	coelEpi	0.506	0.253861357148086	0.415	0.271059272900894	Sertoli_WFDC2	0.66054138799021	1.3054177628265	2.10138392585582e-58
GOLIM4	coelEpi	0.311	0.106141570895249	0.189	0.120114589727849	ovarianSurf	0.65910512308448	2.11930907744206	3.66264683090077e-61
MMP28	coelEpi	0.258	0.0649293609545421	0.495	0.0780983561830707	sPAX8m	0.657844857647081	2.54978626994992	1.39062989364357e-71
TSPO	coelEpi	0.526	0.268940780323549	0.582	0.286474319623491	ovarianSurf	0.657555956756739	1.2501063816668	2.53518693748579e-59
MSRB3	coelEpi	0.235	0.0486055193616866	0.15	0.0613191460336948	sPAX8m	0.656040840594661	2.79166315146664	4.18009471136246e-78
HRH2	coelEpi	0.189	0.0195446892614011	0.09	0.0311029261305504	sLGR5_female	0.655915688144113	3.47045337642388	2.04531744752917e-100
EFNB3	coelEpi	0.273	0.077593148378596	0.205	0.0909214923947889	ovarianSurf	0.654588170352359	2.39775886575956	1.36872241722716e-66
PRSS35	coelEpi	0.688	0.366078617963546	0.75	0.388036286747152	preGC_I	0.651299617777081	0.946656421187617	6.47824573907406e-86
CDK6	coelEpi	0.552	0.290022692335847	0.534	0.307891685423914	ovarianSurf	0.650259990165552	1.17800722856078	5.21579471342016e-60
SELENOM	coelEpi	0.477	0.239953151306639	0.372	0.256121683377669	granulosa	0.649722950569994	1.36210262174003	3.6340308356213e-53
CARNS1	coelEpi	0.18	0.0159578361759754	0.143	0.0271468521928927	ovarianSurf	0.649168952517689	3.60649418065383	2.78037889073556e-103
RND3	coelEpi	0.345	0.138496449747456	0.424	0.152581679285178	sKITLG	0.648619052434606	1.88005522444813	7.16877345399544e-54
SOCS3	coelEpi	0.31	0.110460434814435	0.368	0.124070663665507	ovarianSurf	0.646940242300244	2.08690400742014	3.27526223649724e-57
COL26A1	coelEpi	0.295	0.0985286582241417	0.311	0.111929609167178	ovarianSurf	0.646016102980211	2.18988509484817	3.23933498180177e-59
PRKG1	coelEpi	0.299	0.101822706976063	0.325	0.115271809562786	sKITLG	0.645978251028322	2.16046237802115	1.52185691671427e-58
WNT2B	coelEpi	0.656	0.353780835956372	0.763	0.374394652479367	ovarianSurf	0.644483800206774	0.982444817388375	6.24581321818689e-76
PODN	coelEpi	0.198	0.0270844008491326	0.228	0.0387422413205102	ovarianSurf	0.643663303908988	3.25082476721711	3.43476885360925e-89
GPRC5C	coelEpi	0.31	0.112070858648708	0.292857142857143	0.125571243434964	sLGR5_male	0.643213421458608	2.07488200470519	5.67477988164951e-56
MEGF6	coelEpi	0.218	0.0402605958568187	0.223	0.0523838755882955	ovarianSurf	0.642916106708349	2.94915645279059	2.78420515781632e-79
WNT5A	coelEpi	0.345	0.141497694165874	0.344	0.155378214310074	ovarianSurf	0.642353099466242	1.86189304193114	6.82094359382384e-52
HOXA5	coelEpi	0.175	0.0145670155918308	0.0971128608923885	0.0255098560807585	FetalLeydig-like	0.642020817991653	3.66869038852373	2.35776978736364e-103
TNFRSF1A	coelEpi	0.436	0.216455603542932	0.366	0.231430325352977	sPAX8m	0.638075719623159	1.46347642115403	3.49147528748957e-48
RAB34	coelEpi	0.747	0.402459556401435	0.674	0.425960030011595	ovarianSurf	0.637497093243804	0.853409763378587	7.08088981188036e-99
FKBP7	coelEpi	0.445	0.22370251079716	0.418	0.238796807857581	sKITLG	0.637303307917702	1.4321422649836	3.49906835990826e-48
ITGA3	coelEpi	0.306	0.1114852499817	0.235	0.124752745378896	ovarianSurf	0.636914990489504	2.0814215375474	1.86714194143785e-54
AMOTL2	coelEpi	0.338	0.138496449747456	0.307	0.152104222085806	ovarianSurf	0.636517990661626	1.8831893214841	1.15513777749102e-50
LAMA5	coelEpi	0.312	0.11682892906815	0.29	0.130141190914672	ovarianSurf	0.63621022418617	2.03913533393003	2.09072221134351e-53
KREMEN2	coelEpi	0.241	0.0590732742844594	0.216	0.0714821635631949	sLGR5_female	0.635832064374804	2.63830732105728	3.81452747830323e-68
MYADM	coelEpi	0.663	0.363443378962009	0.664	0.383875588295478	sPAX8m	0.634780576987742	0.957436767703985	2.12571021168019e-74
HOXA3	coelEpi	0.172	0.0142010101749506	0.0971128608923885	0.0249641907100471	FetalLeydig-like	0.634733810636346	3.6903128525369	6.99781614214264e-102
SLC10A4	coelEpi	0.142	0.00190322816777688	0.00714285714285714	0.0114589727849396	sLGR5_male	0.634595473327971	4.46898220653501	1.83143891634376e-138
ARHGAP29	coelEpi	0.527	0.283800600248884	0.667	0.300388786576632	sPAX8e	0.633811141626431	1.20267768809569	2.08042453394449e-52
MYO1C	coelEpi	0.251	0.0676378010394554	0.141	0.0801446013232385	ovarianSurf	0.633504612599361	2.52392275936001	2.33936109495792e-64
C9orf3	coelEpi	0.35	0.150135422004246	0.333	0.163767819384762	sPAX8m	0.633256956400954	1.80930558971701	1.073619124972e-48
DHRS3	coelEpi	0.242	0.0614157089524925	0.217	0.0737330332173794	granulosa	0.630967657128372	2.60730436829906	5.47600160400571e-66
GAL3ST3	coelEpi	0.201	0.0319156723519508	0.09	0.0434486051428961	sPAX8m	0.630371482603586	3.1361765303661	1.14179139149613e-81
NUPR1	coelEpi	0.398	0.191128028694825	0.586	0.20523838755883	granulosa	0.630266077504671	1.58358310930822	8.36442605506311e-46
TRIP6	coelEpi	0.483	0.255837786399239	0.464	0.271332105586249	ovarianSurf	0.63003086391126	1.30441172652435	8.07383032807785e-48
HSBP1L1	coelEpi	0.338	0.14193690066613	0.333	0.155310006138735	ovarianSurf	0.629468256517589	1.86233211987452	1.76984152429057e-48
PAWR	coelEpi	0.433	0.219310445794598	0.351	0.233885819521179	ovarianSurf	0.629115327094824	1.45292223347534	1.4956712314188e-45
RASSF7	coelEpi	0.475	0.250713710562916	0.528	0.266011868221813	ovarianSurf	0.62900181806475	1.32421435382053	4.58250562944138e-47
HTRA1	coelEpi	0.353	0.155186296757192	0.466	0.168678807721165	ovarianSurf	0.628254898201147	1.77975891841685	5.59486166443997e-47
AGRN	coelEpi	0.331	0.137105629163312	0.276	0.150330809630994	ovarianSurf	0.627217532185267	1.89491701566546	2.02694136457484e-48
B3GLCT	coelEpi	0.192	0.0269379986823805	0.0571428571428571	0.0381965759497988	sLGR5_male	0.626881805224141	3.26500940220907	7.89097332824716e-85
CPE	coelEpi	0.799	0.431447185418344	0.81	0.456517290771434	sPAX8e	0.62651883356726	0.784128702837622	1.02078797188546e-114
GCA	coelEpi	0.598	0.332845326110826	0.617	0.350931041538776	ovarianSurf	0.626204991526728	1.04716553767011	2.91753179340992e-59
EDN2	coelEpi	0.164	0.0116389722567894	0.061	0.0220312393424732	ovarianSurf	0.62570819348536	3.81529386271561	1.01915173364319e-103
CARD16	coelEpi	0.208	0.0384305687724178	0.156	0.0499965895914331	ovarianSurf	0.623126500682735	2.99580048405161	2.70626945549515e-75
SYT1	coelEpi	0.417	0.210453114706098	0.475	0.224541300047746	sLGR5_male	0.622871075266924	1.4936956241413	1.34628990092243e-43
CCBE1	coelEpi	0.283	0.0982358538906376	0.478	0.110838278425755	granulosa	0.622510314802363	2.19968309117443	2.31435048095297e-53
AGPAT2	coelEpi	0.304	0.116243320401142	0.169	0.129049860173249	Sertoli_WFDC2	0.622457156643238	2.04755643632644	4.83964861049041e-50
PDGFD	coelEpi	0.229	0.0545348071151453	0.13	0.0664347588841143	sPAX8e	0.620941488045722	2.71153488229573	2.6262850011569e-66
MMP2	coelEpi	0.615	0.346680330868897	0.667	0.364981924834595	sKITLG	0.61986308029058	1.00790744762696	3.47831256442106e-60
GLT8D2	coelEpi	0.217	0.0458238781933973	0.154	0.057499488438715	sPAX8m	0.619747492462201	2.85597922793641	3.40440269733179e-70
BOC	coelEpi	0.315	0.127077080740795	0.243	0.139894959416138	preGC_IIb	0.619561979777753	1.96686342786588	9.79978530063263e-48
SLIT3	coelEpi	0.187	0.0255471780982359	0.148	0.0365595798376646	sPAX8e	0.618747848650215	3.30881202486746	6.03967604300175e-84
NR3C1	coelEpi	0.427	0.220847668545494	0.35	0.234908942091263	preGC_IIb	0.618533975806805	1.44855732039064	1.80076567180714e-42
COL11A1	coelEpi	0.687	0.386208915891955	0.823	0.406725325694018	ovarianSurf	0.618037014212014	0.899617196815159	9.40062240304307e-75
HCFC1R1	coelEpi	0.686	0.385842910475075	0.485	0.406316076665985	preGC_I	0.61782800110037	0.900623908309577	1.92799433552777e-74
SH3GL2	coelEpi	0.179	0.0210819120122978	0.04	0.0318532160152786	sKITLG	0.616944430160217	3.44661692826937	5.59492439232657e-88
LGALS3	coelEpi	0.698	0.392504209062294	0.827	0.413341518313894	ovarianSurf	0.616669812598683	0.883481106874904	3.9197165474094e-77
SNHG18	coelEpi	0.434	0.227728570382842	0.433	0.241797967396494	ovarianSurf	0.616129292185864	1.41965274697204	6.2458570323842e-42
TMEM109	coelEpi	0.596	0.338189005197277	0.519	0.35577382170384	sKITLG	0.615942209069738	1.03346008233178	6.48252245190151e-56
CAVIN3	coelEpi	0.408	0.207305468120928	0.319	0.220994475138122	preGC_IIb	0.615923971477971	1.50961757715189	1.21358955761729e-41
SH3BP5	coelEpi	0.528	0.295878779005929	0.615	0.311711343018894	ovarianSurf	0.615477826682408	1.16567770205001	2.78065585293845e-47
SEZ6L2	coelEpi	0.428	0.224361320547544	0.425	0.23825114248687	Sertoli_WFDC2	0.613936014804253	1.43442994113143	3.22599087291904e-41
C1S	coelEpi	0.235	0.0615621111192446	0.202	0.0733919923606848	ovarianSurf	0.613806004625886	2.61194044521653	1.1296361192806e-61
TGFBI	coelEpi	0.203	0.0373325525217773	0.103	0.0486324261646545	sKITLG	0.613763347401366	3.02346476552397	1.29013395816988e-73
STMN3	coelEpi	0.329	0.142083302832882	0.312	0.154832548939363	ovarianSurf	0.613720243827267	1.86541107546282	1.71603403679502e-44
BCAN	coelEpi	0.162	0.0124441841739258	0.1	0.0226451128845236	sLGR5_male	0.613625417157528	3.78781121702178	6.67443392723141e-99
IGFBP6	coelEpi	0.194	0.0314032647683186	0.112	0.0424936907441512	ovarianSurf	0.612729535427257	3.15839966715081	1.75889772645282e-77
TEKT3	coelEpi	0.2	0.0355025254373765	0.134	0.0467225973671646	ovarianSurf	0.612705469535208	3.06352734767604	1.51012286989495e-74
TMBIM1	coelEpi	0.442	0.23643949930459	0.341	0.250460405156538	ovarianSurf	0.611928859915465	1.38445443419788	5.71635155553608e-41
LXN	coelEpi	0.26	0.0830100285484225	0.186	0.0950821908464634	ovarianSurf	0.611783534600627	2.3530135946178	2.3108497543498e-54
ZNF467	coelEpi	0.176	0.0204231022619135	0.061	0.0310347179592115	sPAX8e	0.611186182989767	3.47264876698731	3.53195735548748e-87
CDC42EP5	coelEpi	0.253	0.0778127516287241	0.324	0.0897619534820271	Sertoli_WFDC2	0.60988030073541	2.410594074053	2.41810494871452e-55
GSDME	coelEpi	0.317	0.133591977161262	0.391	0.14610190300798	Sertoli_WFDC2	0.609733946372991	1.92345093493057	1.73279306457221e-44
PDGFRA	coelEpi	0.219	0.0507283507795915	0.177	0.0622058522611009	sKITLG	0.608230056894201	2.77730619586393	6.82394997118765e-65
SIGIRR	coelEpi	0.458	0.251884927896933	0.424	0.265943660050474	Sertoli_WFDC2	0.606607625005696	1.32447079695567	4.49524884026566e-40
AFDN	coelEpi	0.403	0.208989093038577	0.4	0.222222222222222	Sertoli_WFDC2	0.606143190900839	1.50407739677627	5.76553204693718e-39
TRAPPC2L	coelEpi	0.64	0.370324280799356	0.703	0.388718368460542	ovarianSurf	0.604736119106089	0.944900186103265	3.13767551670543e-60
LINC01133	coelEpi	0.146	0.00636849425371496	0.075	0.0158925039219699	ovarianSurf	0.604718528926394	4.14190773237256	6.70035577841924e-110
CCND3	coelEpi	0.46	0.254666569065222	0.553	0.268671986904031	sKITLG	0.604561450564985	1.31426402296736	1.32022523862066e-39
BAIAP2	coelEpi	0.321	0.140765683332113	0.308	0.153059136484551	ovarianSurf	0.602494825093913	1.87693091929568	6.63850571311636e-42
GRB7	coelEpi	0.318	0.138496449747456	0.356	0.150740058659027	ovarianSurf	0.601719088473616	1.89219839142647	5.66885523558239e-42
FBXO17	coelEpi	0.43	0.235268281970573	0.426	0.248550576359048	sPAX8m	0.598606838850119	1.39210892755842	4.07274597891157e-37
EML3	coelEpi	0.237	0.0685894151233438	0.149	0.0800763931518996	ovarianSurf	0.598371481975403	2.52477418555022	1.83804222970448e-55
CLIC4	coelEpi	0.469	0.265353927238123	0.447	0.279244253461565	Sertoli_WFDC2	0.598288488847287	1.27566841971703	2.39561279800258e-38
EVA1B	coelEpi	0.214	0.0502159431959593	0.109	0.0613873542050338	sKITLG	0.597178004439386	2.79055142261395	1.93402830295296e-62
EDNRB	coelEpi	0.186	0.0298660420174219	0.15	0.0405156537753223	ovarianSurf	0.596328437183065	3.20606686657562	1.67497244548644e-74
FAM3C	coelEpi	0.423	0.231169021301515	0.471	0.244253461564695	Sertoli_WFDC2	0.596239149142549	1.40954881593983	2.19592614389092e-36
DSE	coelEpi	0.312	0.136520020496303	0.24	0.148489189004843	sLGR5_female	0.59505985490756	1.90724312470372	1.23730581492743e-40
EDNRA	coelEpi	0.222	0.0575360515335627	0.194	0.0687538367096378	sPAX8m	0.594343447682143	2.67722273730695	1.42276438595731e-58
CFH	coelEpi	0.159	0.0140546080081985	0.0708661417322835	0.0239410681399632	FetalLeydig-like	0.593413434033111	3.7321599624724	9.57886120907875e-91
NPDC1	coelEpi	0.652	0.384378888807554	0.552	0.402632835413683	preGC_IIc	0.593144097374819	0.909730210697575	3.90781199497368e-59
FCHO1	coelEpi	0.228	0.0629529317033892	0.152	0.0742104904167519	ovarianSurf	0.592993744943102	2.60084975852238	3.64292901926581e-56
PALLD	coelEpi	0.463	0.264548715320987	0.525	0.278084714548803	ovarianSurf	0.592561050684102	1.27982948311901	1.43175582281122e-36
RBFOX2	coelEpi	0.557	0.329624478442281	0.517857142857143	0.345133346974968	sLGR5_male	0.592550203976812	1.06382442365675	4.83582197968194e-44
GPX8	coelEpi	0.454	0.257960617817144	0.434	0.271332105586249	sLGR5_female	0.592202923842054	1.30441172652435	4.14386282164696e-36
GATA5	coelEpi	0.356	0.17736622502013	0.407	0.189550508150876	Sertoli_WFDC2	0.592063513205691	1.66309975619576	2.11925185885547e-36
SORBS3	coelEpi	0.415	0.22758216821609	0.322	0.240365595798377	preGC_I	0.591621592536111	1.42559419888219	4.31831244855179e-35
ROR1	coelEpi	0.223	0.0594392797013396	0.135714285714286	0.0705954573357888	sLGR5_male	0.591126054093251	2.6507894802388	4.67401869142599e-57
ZNF330	coelEpi	0.37	0.191274430861577	0.347	0.203464975104017	ovarianSurf	0.589136718526701	1.59226140142352	5.03508918469705e-35
EPHB6	coelEpi	0.299	0.127809091574555	0.373	0.139485710388105	Sertoli_WFDC2	0.588968142120947	1.96979311746136	2.4076302953786e-40
TSHZ3	coelEpi	0.282	0.112656467315716	0.252	0.124207080008185	granulosa	0.588197039951405	2.08580510621066	1.72911452797274e-42
PDGFC	coelEpi	0.289	0.119610570236439	0.261	0.131164313484755	granulosa	0.587046983261001	2.03130444034948	4.20355235303873e-41
ROM1	coelEpi	0.186	0.0321352756020789	0.07	0.042630107086829	ovarianSurf	0.586866183733547	3.15519453620186	1.9628836522612e-70
CACNB3	coelEpi	0.422	0.23717151013835	0.488	0.249778323443148	ovarianSurf	0.585390576417007	1.38718146070381	1.50229688172652e-33
FBN2	coelEpi	0.189	0.0347705146036161	0.105	0.0452902257690471	ovarianSurf	0.584891502891286	3.09466403646183	4.14870122080624e-68
GATA6	coelEpi	0.584	0.351511602371715	0.496	0.367369210831458	sPAX8m	0.584810540938965	1.00138791256672	2.50821175217536e-45
CTSH	coelEpi	0.284	0.116170119317766	0.329	0.127617488575131	ovarianSurf	0.584675872144626	2.05871785966418	4.12774486670878e-41
TUBB6	coelEpi	0.246	0.081838811214406	0.254	0.0930359457062956	sPAX8m	0.584193259493575	2.37476934753486	3.28279636437721e-48
LIMD2	coelEpi	0.302	0.13307956957763	0.442857142857143	0.144601323238524	sLGR5_male	0.583999995118206	1.93377481827221	1.62075512349737e-38
CRYL1	coelEpi	0.279	0.111924456481956	0.232	0.123320373780779	preGC_IIb	0.583938530951134	2.09296964498614	1.17252814510295e-41
LMNA	coelEpi	0.524	0.31395944659981	0.555	0.328285928654253	Sertoli_WFDC2	0.583668045916821	1.11387031663516	2.57795473248766e-38
CA11	coelEpi	0.348	0.175170192518849	0.357142857142857	0.186958597639997	sLGR5_male	0.583550095193147	1.67686808963548	1.67254041292764e-34
GAS6	coelEpi	0.713	0.421784642412708	0.699	0.441647909419548	granulosa	0.582693759451185	0.817242299370526	3.1796896978693e-70
PDGFRL	coelEpi	0.242	0.0790571700461167	0.396	0.0901712025100607	sPAX8m	0.582262930057445	2.40604516552663	1.57569857218857e-48
PDLIM4	coelEpi	0.48	0.287021447917429	0.694	0.300184162062615	Sertoli_WFDC2	0.577612377181043	1.20335911912717	1.3343646615253e-33
ACTN1	coelEpi	0.291	0.126930678574043	0.256	0.138121546961326	ovarianSurf	0.576069771061709	1.97962120639763	1.43733204162221e-37
MARVELD1	coelEpi	0.298	0.133518776077886	0.271	0.144737739581202	ovarianSurf	0.575983896295772	1.93283186676434	1.1402061524635e-36
ATP1B3	coelEpi	0.311	0.14618256350194	0.287	0.157424459450242	ovarianSurf	0.574979772634495	1.84880955831027	5.69055474987109e-35
PLEKHA5	coelEpi	0.304	0.139740868164849	0.236	0.150944683173044	Sertoli_WFDC2	0.574815921149713	1.89084184588721	1.18875245624304e-35
CRABP2	coelEpi	0.424	0.24566283580997	0.792857142857143	0.257826887661142	sLGR5_male	0.574717964465644	1.35546689732463	7.04965871925218e-31
MRGPRF	coelEpi	0.14	0.00746651050435546	0.047	0.0165063774640202	preGC_I	0.574561184369421	4.10400845978158	2.27152208826113e-98
ARHGEF3	coelEpi	0.29	0.127589488324427	0.305	0.138667212332037	Sertoli_WFDC2	0.572946727969876	1.97567837230992	8.68548720074026e-37
KRTCAP3	coelEpi	0.216	0.0598784862015958	0.195	0.0705272491644499	ovarianSurf	0.572779324267896	2.65175613086989	1.23772920891933e-52
PLPP4	coelEpi	0.132	0.00439206500256204	0.017	0.0130959688970739	Sertoli_WFDC2	0.572279507436184	4.33545081391048	4.52042329503348e-107
COL27A1	coelEpi	0.274	0.113095673815972	0.283	0.124070663665507	ovarianSurf	0.571811698033119	2.08690400742014	9.11495123802318e-39
IGF2BP2	coelEpi	0.483	0.294121953004904	0.617857142857143	0.307004979196508	sLGR5_male	0.570370504007695	1.18089131264533	5.71764644859429e-32
RABEPK	coelEpi	0.296	0.134982797745407	0.231	0.145965486665303	ovarianSurf	0.569617983065021	1.92438507792237	4.37932149565474e-35
RHOU	coelEpi	0.272	0.112656467315716	0.221428571428571	0.123524998294796	sLGR5_male	0.56883679003092	2.09131172805485	3.39616972086908e-38
EEF1A2	coelEpi	0.135	0.00600248883683478	0.041994750656168	0.014801173180547	FetalLeydig-like	0.568761592373704	4.2130488323978	9.87405572041556e-101
RAC2	coelEpi	0.296	0.135934411829295	0.328	0.146852192892709	ovarianSurf	0.567825291817875	1.9183286885739	1.4025814847532e-34
SCG5	coelEpi	0.601	0.373471927384525	0.616	0.388991201145897	ovarianSurf	0.567463331423817	0.944198554781726	5.31128188440781e-43
NKAIN4	coelEpi	0.18	0.0328672864358392	0.176	0.0429029397721847	sKITLG	0.566786687262808	3.14881492923782	5.03827089810221e-65
PLSCR4	coelEpi	0.34	0.179123051021155	0.338	0.190096173521588	ovarianSurf	0.564476553875148	1.66022515845632	6.5346879391148e-30
CAPN2	coelEpi	0.412	0.242588390308177	0.346	0.25414364640884	ovarianSurf	0.564380521528013	1.36985563477673	3.21829327447333e-28
WDPCP	coelEpi	0.225	0.071078251958129	0.176	0.081576972921356	ovarianSurf	0.56389685657123	2.50620825142769	8.89951957371876e-47
DAPK1	coelEpi	0.405	0.237098309054974	0.455	0.248550576359048	granulosa	0.563804115661158	1.39210892755842	4.71924022998347e-28
EZR	coelEpi	0.83	0.483712758948832	0.753	0.507332378418935	ovarianSurf	0.563228796506197	0.678588911453249	2.45099589806254e-105
QPRT	coelEpi	0.281	0.124075836322378	0.244	0.134779346565719	sKITLG	0.563156682444157	2.00411630763045	3.60120394850015e-35
RDH14	coelEpi	0.338	0.178830246687651	0.293	0.189686924493554	preGC_I	0.561884552116053	1.6623803317043	2.31276424419944e-29
SSPN	coelEpi	0.338	0.179049849937779	0.386	0.189891549007571	sPAX8m	0.561520131595577	1.66130216448395	2.87010502151764e-29
UGP2	coelEpi	0.52	0.327282043774248	0.518	0.340426983152582	ovarianSurf	0.560328400563701	1.07755461646866	4.45623796503081e-32
TP53I13	coelEpi	0.372	0.211258326623234	0.299	0.222222222222222	ovarianSurf	0.559516791600774	1.50407739677627	2.20238708998414e-27
CYP2W1	coelEpi	0.164	0.0234243466803309	0.062992125984252	0.0330127549280404	FetalLeydig-like	0.559381249792348	3.41086127922163	7.73550977156616e-71
SAMD11	coelEpi	0.174	0.0303784496010541	0.164	0.0401746129186277	sPAX8m	0.559326480397882	3.21452000228668	5.03827089810221e-65
CLPSL1	coelEpi	0.118	0.000805211917136374	0.004	0.00879885410272151	sLGR5_female	0.558509786226038	4.73313378157659	9.52023369436326e-124
TMEM132A	coelEpi	0.403	0.239147939389503	0.482	0.25032398881386	Sertoli_WFDC2	0.558154695690528	1.38499924488965	1.07217126146795e-26
CPXM1	coelEpi	0.662	0.41343971890784	0.695	0.430393561148626	granulosa	0.55810256252679	0.843055230403006	6.82906991704945e-51
CAVIN2	coelEpi	0.155	0.0180074665105044	0.113	0.0273514767069095	sPAX8m	0.557842637587913	3.5989847586317	3.71034090250651e-76
COLEC12	coelEpi	0.222	0.0708586487080009	0.279	0.0811677238933224	preGC_I	0.557494747162857	2.51123759983269	1.93840474287556e-45
LETMD1	coelEpi	0.459	0.285045018666276	0.435	0.296910169838347	ovarianSurf	0.557375470773159	1.21432564438597	1.12202081567718e-27
NLRP1	coelEpi	0.478	0.299465632091355	0.539285714285714	0.311643134847555	sLGR5_male	0.557298548211247	1.16589654437499	1.55406308256696e-28
SFRP2	coelEpi	0.22	0.0699070346241124	0.321	0.0801446013232385	ovarianSurf	0.555263007059201	2.52392275936001	2.97138534245107e-45
CXADR	coelEpi	0.344	0.188785594026792	0.512	0.199372484823682	Sertoli_WFDC2	0.554727664764494	1.61258042082702	3.08161081242014e-27
WLS	coelEpi	0.506	0.321938364687797	0.521428571428571	0.334492872246095	sLGR5_male	0.554140692411042	1.09513970832222	1.63834143062684e-29
COL8A2	coelEpi	0.136	0.00834492350486787	0.074	0.0170520428347316	ovarianSurf	0.553721996458339	4.07148526807602	1.46736466949449e-90
SERTAD3	coelEpi	0.384	0.226264548715321	0.328	0.237023395402769	preGC_I	0.552805028328719	1.43959642793937	1.51626633180714e-25
BASP1	coelEpi	0.492	0.313081033599297	0.65	0.32528476911534	sLGR5_male	0.5525426996789	1.12305426764004	3.25398502723538e-28
DMKN	coelEpi	0.688	0.43078837566796	0.766	0.448332310210763	ovarianSurf	0.551927743680186	0.802220557674688	1.24133476488846e-54
ADI1	coelEpi	0.537	0.34477710270112	0.599	0.357888275015347	sLGR5_female	0.551785984749084	1.02753442225155	1.81653669486334e-31
ZNF503	coelEpi	0.514	0.329551277358905	0.666	0.342132187436055	preGC_I	0.551294865263511	1.07255810362551	2.01647535503687e-29
EI24	coelEpi	0.506	0.323987995022326	0.481	0.336402701043585	ovarianSurf	0.551259838756939	1.08944632165403	7.84958784552633e-29
INAFM1	coelEpi	0.226	0.0774467462118439	0.158	0.0875792919991815	sPAX8m	0.550357618581569	2.43521070168836	5.80563469315773e-42
ARL5A	coelEpi	0.469	0.297782007173706	0.426	0.309460473364709	sLGR5_female	0.550101781042647	1.1729249062743	2.06121119895516e-26
GRB10	coelEpi	0.171	0.0305248517678062	0.103	0.0401064047472887	sPAX8m	0.549973489704778	3.21621923803964	1.08145039746308e-62
APCDD1	coelEpi	0.191	0.0464826879437816	0.104	0.0563399495259532	sLGR5_female	0.549383119771702	2.87635141241729	4.14979459777304e-53
SLC10A3	coelEpi	0.293	0.143620525583779	0.272	0.153809426369279	Sertoli_WFDC2	0.548507993662435	1.87204093400149	1.32445268686577e-29
PBX1	coelEpi	0.65	0.414318131908352	0.786	0.430393561148626	ovarianSurf	0.547985899761954	0.843055230403006	9.56472177408643e-46
TMEM98	coelEpi	0.903	0.519361686552961	0.782142857142857	0.545528954368733	sLGR5_male	0.547217455067945	0.605999396531501	2.52923482029492e-140
S100A11	coelEpi	0.359	0.207964277871312	0.733	0.218266148284565	Sertoli_WFDC2	0.54641239487701	1.52204009715045	1.31744491343797e-24
NR2F1-AS1	coelEpi	0.14	0.0114193690066613	0.0656167979002625	0.0201896187163222	FetalLeydig-like	0.546362142425989	3.9025867316142	1.41111906424136e-82
CDH3	coelEpi	0.548	0.356342873874533	0.631	0.369415455971625	preGC_I	0.545716687497692	0.995833371346154	4.84507027124203e-31
FAM114A1	coelEpi	0.324	0.175536197935729	0.297	0.185662642384558	Sertoli_WFDC2	0.5455589768835	1.68382400272685	3.90764338306257e-26
CDON	coelEpi	0.346	0.196471707781275	0.381	0.206670759156947	sLGR5_female	0.545513387452458	1.57662828743485	6.79634088884565e-25
TAGLN	coelEpi	0.185	0.0428958348583559	0.242	0.0525885001023123	sPAX8m	0.544872695289363	2.94525781237494	6.66202243235874e-54
EPB42	coelEpi	0.143	0.0133957982578142	0.104	0.02223586385649	ovarianSurf	0.544264979053733	3.80604880457156	7.50562555252625e-79
RSPO1	coelEpi	0.264	0.117487738818535	0.293	0.127481072232453	preGC_I	0.543783867919433	2.0597873784827	3.72493319691225e-32
CLDN1	coelEpi	0.262	0.115804113900886	0.579	0.12577586794898	sPAX8m	0.543192490837292	2.07325378182173	2.64129757002704e-32
ARL4A	coelEpi	0.664	0.425005490081253	0.77	0.441306868562854	sLGR5_female	0.543161826166363	0.818014798443318	4.59367547435986e-47
PTN	coelEpi	0.585	0.381963253056145	0.734	0.39581201827979	preGC_I	0.542187290822379	0.926815881747656	2.73587254838429e-34
MUS81	coelEpi	0.297	0.151306639338262	0.493	0.161244117045222	ovarianSurf	0.541976234801446	1.82483580741228	1.78452419856413e-27
THBD	coelEpi	0.158	0.0232047434302028	0.082	0.03239888138599	ovarianSurf	0.541881758340773	3.42963138190362	8.7809756952635e-67
MED30	coelEpi	0.388	0.237317912305102	0.339	0.247595661960303	preGC_I	0.541631804367595	1.39595825867937	6.35562519131037e-23
YIPF2	coelEpi	0.416	0.261693873069321	0.36	0.272218811813655	sLGR5_female	0.541278017650045	1.30114908088953	6.79723304197845e-23
BIN1	coelEpi	0.403	0.250786911646292	0.392	0.261169088056749	sLGR5_female	0.541062655487771	1.34258723446097	9.36416515588837e-23
GAS1	coelEpi	0.308	0.163384818095308	0.351	0.173248755200873	preGC_IIb	0.53993226238511	1.75302682592568	6.07215547647874e-26
LIMS1	coelEpi	0.416	0.26264548715321	0.37	0.273105518041061	Sertoli_WFDC2	0.539925170929312	1.29789704550315	1.35042931391418e-22
PTGER2	coelEpi	0.138	0.0114925700900373	0.044	0.0201214105449833	sPAX8e	0.539023974484585	3.90597082959844	1.50667725996471e-80
RGS3	coelEpi	0.383	0.234682673303565	0.411	0.244799126935407	Sertoli_WFDC2	0.539002523904822	1.40731729479066	2.18084210338869e-22
SOSTDC1	coelEpi	0.296	0.152185052338775	0.341	0.16199440692995	preGC_IIc	0.538777266962979	1.82019346946952	9.46554078456899e-27
UXS1	coelEpi	0.279	0.135348803162287	0.228571428571429	0.145146988609235	sLGR5_male	0.538472325598008	1.93000833547673	1.41756900926514e-28
PROCR	coelEpi	0.646	0.419076202327794	0.844	0.4345542596003	granulosa	0.538398663628868	0.833434463821776	2.09331477694888e-42
CORO1B	coelEpi	0.44	0.28350779591538	0.414	0.29418184298479	sLGR5_female	0.538365163287785	1.22355718929042	1.02342144307903e-22
RNASET2	coelEpi	0.326	0.182270697606325	0.324	0.192074210490417	ovarianSurf	0.537858750783268	1.64987346866033	4.02491061844347e-24
SOX8	coelEpi	0.134	0.00958934192226045	0.061	0.0180751654048155	ovarianSurf	0.537770992233574	4.01321635995204	1.0632338158044e-83
PALMD	coelEpi	0.174	0.0360881341043847	0.112860892388451	0.0454948502830639	FetalLeydig-like	0.537687168363939	3.09015614002264	3.88209428424814e-56
CRB2	coelEpi	0.162	0.0270844008491326	0.169	0.0362867471523088	ovarianSurf	0.537241036848653	3.31630269659662	2.4578623874633e-62
KLF6	coelEpi	0.494	0.325671619939975	0.525	0.337152990928313	Sertoli	0.537085925479865	1.08721847263131	8.66790848249608e-25
PIANP	coelEpi	0.17	0.0332332918527194	0.12	0.0425618989154901	ovarianSurf	0.536655288986702	3.15679581756884	1.00244842558545e-57
CEBPD	coelEpi	0.461	0.301515262425884	0.618	0.312393424732283	preGC_IIb	0.536369769970646	1.16349190883003	5.58021650568235e-23
MFAP2	coelEpi	0.937	0.537515555230217	0.917	0.564763658686311	sPAX8e	0.535353018429745	0.571347938558959	1.77362013132087e-161
PDK2	coelEpi	0.436	0.282922187248371	0.407	0.293363344928722	sKITLG	0.534685701975374	1.22634335315453	8.17578356486033e-22
AC009041.2	coelEpi	0.148	0.0181538686772564	0.095	0.0270104358502149	ovarianSurf	0.5345067322532	3.61153197468378	3.34853043692889e-70
ARMCX2	coelEpi	0.392	0.24602884122685	0.338	0.255985267034991	sKITLG	0.534153071626872	1.36263538680324	3.05731957016523e-21
DSG2	coelEpi	0.368	0.224654124881048	0.387	0.23443148489189	granulosa	0.533817822544542	1.45059190908843	1.77405106007644e-21
UBE2E2	coelEpi	0.506	0.336798184613132	0.497	0.348339131027897	sLGR5_female	0.533616852201054	1.05457875929062	8.83372141037977e-25
ID3	coelEpi	0.491	0.326110826440231	0.78	0.33735761544233	Sertoli_WFDC2	0.533526363287739	1.0866117378569	8.0044743197502e-24
ARID5B	coelEpi	0.547	0.364834199546153	0.604	0.377259395675602	Sertoli_WFDC2	0.533227784941142	0.974822275943587	5.37411968399149e-28
KCNQ1OT1	coelEpi	0.52	0.347046336285777	0.531	0.358843189414092	sKITLG	0.532932287787878	1.02486978420746	1.2409333768643e-25
MCC	coelEpi	0.275	0.134470390161774	0.275	0.144055657867813	granulosa	0.532827773805831	1.93755554111211	1.3864101896278e-27
EIF4EBP1	coelEpi	0.693	0.446965815094063	0.641	0.463747356933361	ovarianSurf	0.532511847537381	0.768415364411805	4.064415941905e-50
FKBP10	coelEpi	0.627	0.413293316741088	0.653571428571429	0.427869858809085	sLGR5_male	0.532282996046634	0.848936197841521	1.18393096026356e-37
PLLP	coelEpi	0.27	0.129712319742332	0.447	0.139281085874088	Sertoli_WFDC2	0.532240520547687	1.97126118721365	4.34269690723304e-28
PCGF2	coelEpi	0.353	0.212209940707122	0.344	0.221812973194189	sLGR5_female	0.531590012490509	1.50592071527056	2.13067490183382e-21
EFEMP1	coelEpi	0.21	0.0701266378742405	0.244	0.079667144123866	ovarianSurf	0.531278584735519	2.52989802255009	4.12528941089491e-40
FGF18	coelEpi	0.133	0.0101749505892687	0.067	0.018552622604188	Sertoli_WFDC2	0.530290167912422	3.98714411964227	1.24672935240256e-80
YIF1A	coelEpi	0.557	0.373764731718029	0.488	0.38626287429234	Sertoli_WFDC2	0.529839075742224	0.95123711982446	3.54025376538745e-28
DPYD	coelEpi	0.257	0.117926945318791	0.267	0.127412864061115	ovarianSurf	0.529502899757415	2.06032256714948	2.93746920730902e-29
TGFB2	coelEpi	0.206	0.0670521923724471	0.154	0.0765295682422754	ovarianSurf	0.529436088570258	2.57007809985562	1.07865465953564e-40
MAGEH1	coelEpi	0.336	0.197423321865164	0.291	0.206875383670964	preGC_I	0.529414595891894	1.57563867824968	1.33304969498377e-21
GNG12	coelEpi	0.329	0.190908425444697	0.286	0.200327399222427	sKITLG	0.528966941809343	1.60780225473964	7.32105745082838e-22
FAM177A1	coelEpi	0.453	0.300783251592124	0.441	0.311165677648182	ovarianSurf	0.528845691741551	1.16742978309393	4.60087318739445e-21
FGF9	coelEpi	0.196	0.0580484591171949	0.126	0.0674578814541982	sLGR5_female	0.528465363445848	2.69625185431555	1.2802496252753e-43
CALU	coelEpi	0.621	0.413000512407584	0.6	0.427187777095696	Sertoli_WFDC2	0.528180125719381	0.850531603412852	1.09290369811328e-35
RBMS1	coelEpi	0.54	0.364541395212649	0.514285714285714	0.376509105790874	sLGR5_male	0.527479045200247	0.976813046667124	4.85641615147757e-26
PCDH9	coelEpi	0.351	0.213161554791011	0.469	0.222563263078917	ovarianSurf	0.527392905160075	1.50254388934494	1.55772733250316e-20
SERTAD4	coelEpi	0.12	0.00453846716931411	0.02	0.0124138871836846	sPAX8e	0.526672739863376	4.38893949886147	1.09535195692681e-93
SSH3	coelEpi	0.212	0.0742258985432984	0.251	0.0836232180615238	ovarianSurf	0.526064022721727	2.48143406944211	7.72284874432158e-38
FAM110B	coelEpi	0.223	0.0852792621330796	0.147	0.0946729418184298	ovarianSurf	0.525683931006348	2.35732704487151	7.2420017901413e-35
SEPT11	coelEpi	0.303	0.167337676597614	0.3	0.17659095559648	sLGR5_male	0.525377519474578	1.73391920618673	8.60882988274146e-23
MAX	coelEpi	0.417	0.274138057243247	0.378	0.283882409112612	granulosa	0.525084389636614	1.25919517898468	2.0063439160482e-19
BET1	coelEpi	0.433	0.287533855501061	0.428	0.297455835209058	ovarianSurf	0.525007961335351	1.2124895180955	1.08795586054841e-19
SLC39A1	coelEpi	0.384	0.245882439060098	0.324	0.255303185321602	ovarianSurf	0.524276535564993	1.36530347803384	3.54794037356e-19
PALM	coelEpi	0.331	0.196252104531147	0.426	0.205443012072846	ovarianSurf	0.523836163613117	1.58258659701848	1.36838280441426e-20
B3GNT2	coelEpi	0.264	0.128321499158188	0.228	0.137575881590615	Sertoli_WFDC2	0.52366502706779	1.98357964798405	1.22944122238942e-26
MMP24OS	coelEpi	0.465	0.314545055266818	0.518	0.324807311915968	ovarianSurf	0.522903268884527	1.12452315889146	2.86142598193144e-20
ALOX15	coelEpi	0.109	0.000878413000512408	0.004	0.00825318873201009	preGC_I	0.522889964797226	4.79715564034152	2.91661975480993e-112
ST6GALNAC3	coelEpi	0.211	0.0746651050435546	0.167	0.0839642589182184	ovarianSurf	0.522723816608054	2.47736405975381	4.82927270323315e-37
SELENOP	coelEpi	0.711	0.462704048019911	0.657	0.47963986085533	sLGR5_female	0.522385739813582	0.734719746573252	2.34314394781846e-51
CRLS1	coelEpi	0.444	0.298660420174219	0.44	0.308573767137303	ovarianSurf	0.522052690823801	1.17579434870225	2.31353533301078e-19
KLF5	coelEpi	0.187	0.0521191713637362	0.229	0.0613191460336948	ovarianSurf	0.522041009324262	2.79166315146664	1.2785493851768e-44
INF2	coelEpi	0.235	0.0994802723080302	0.26	0.108723825114249	Sertoli_WFDC2	0.521451916748204	2.2189443265881	6.10814440296362e-31
COL6A1	coelEpi	0.55	0.376253568552815	0.685	0.388104494918491	granulosa	0.520564362349838	0.946480658817888	2.20108628444136e-25
GORASP2	coelEpi	0.483	0.329917282775785	0.525	0.340358774981243	sLGR5_male	0.520555663644074	1.0777549971927	1.30676247317739e-20
ARL6IP5	coelEpi	0.538	0.368494253714955	0.485	0.380055930700498	Sertoli_WFDC2	0.52048102585875	0.967436851038568	2.66552928236915e-24
GSTM2	coelEpi	0.537	0.368347851548203	0.593	0.379851306186481	preGC_I	0.519802791061196	0.967975402348596	4.55111866315071e-24
GABARAPL1	coelEpi	0.313	0.181099480272308	0.367857142857143	0.190096173521588	sLGR5_male	0.519650474596827	1.66022515845632	1.04627213160176e-20
SURF4	coelEpi	0.459	0.312568626015665	0.489285714285714	0.322556442261783	sLGR5_male	0.519348008772125	1.13147714329439	2.64983518879466e-19
P4HA2	coelEpi	0.467	0.318863919186004	0.523	0.328968010367642	preGC_IIb	0.51920815566096	1.11179476586929	1.36870234257934e-19
PLAUR	coelEpi	0.148	0.021447917429178	0.04	0.0300798035604665	sKITLG	0.51857739395273	3.50390131049142	6.52203408804215e-63
RPS4Y1	coelEpi	0.467	0.320767147353781	0.979	0.330741422822454	Sertoli_WFDC2	0.51669739692497	1.10641840883291	4.44529692344938e-19
CRTAP	coelEpi	0.519	0.358685308542566	0.5	0.369620080485642	sLGR5_male	0.516550117783146	0.99527961037215	5.64794732080378e-22
PXDN	coelEpi	0.363	0.232413439718908	0.478571428571429	0.241320510197122	sLGR5_male	0.516051439972328	1.42162931121853	8.97955904465877e-18
EPS8L2	coelEpi	0.231	0.0983822560573896	0.208	0.107427869858809	ovarianSurf	0.515346131610741	2.23093563467853	5.43089056414596e-30
LGALS8	coelEpi	0.372	0.241343971890784	0.52	0.250255780642521	ovarianSurf	0.515321095308869	1.38527176158298	1.85257534908714e-17
MGAT1	coelEpi	0.312	0.183075909523461	0.321428571428571	0.1918695859764	sLGR5_male	0.515093085763903	1.65093937744841	9.60338778958297e-20
CTSB	coelEpi	0.509	0.353341629456116	0.644	0.363958802264511	granulosa	0.514453730556488	1.0107145983428	7.5500134678902e-21
RHOD	coelEpi	0.213	0.0803015884635093	0.228	0.0893527044539936	ovarianSurf	0.514429882955273	2.41516376974307	6.78507304058731e-34
C1QTNF1	coelEpi	0.151	0.0245955640143474	0.0918635170603675	0.0332173794420572	FetalLeydig-like	0.514106991491207	3.40468206285567	4.95867419331725e-59
CCNB1IP1	coelEpi	0.484	0.335626967279116	0.552	0.345747220517018	sKITLG	0.514030916173503	1.06204734746592	2.5563777528114e-19
SSBP4	coelEpi	0.464	0.321352756020789	0.456	0.331082463679149	sKITLG	0.512899939038397	1.10538779965172	3.43338327543427e-18
BZW2	coelEpi	0.376	0.247053656394115	0.57	0.255848850692313	sKITLG	0.512551331881998	1.36316843585638	7.65424557875744e-17
PCSK1N	coelEpi	0.322	0.195007686113754	0.473	0.203669599618034	sLGR5_female	0.512384498924199	1.59125620783913	1.52679290590806e-18
KRT7	coelEpi	0.117	0.00490447258619428	0.027	0.0125503035263625	ovarianSurf	0.512227220114526	4.37801042832928	1.62009318313874e-88
YPEL3	coelEpi	0.534	0.372300710050509	0.536	0.383329922924766	sPAX8m	0.512030835788982	0.958859243050528	3.77205534282325e-22
CLUL1	coelEpi	0.179	0.0483859161115585	0.09	0.0572948639246982	sPAX8e	0.511858428644062	2.85954429410091	4.27406541340516e-44
C3	coelEpi	0.12	0.00636849425371496	0.064	0.0141190914671578	ovarianSurf	0.511227287120747	4.2602273926729	5.37163256003864e-84
HAND2	coelEpi	0.217	0.0859380718834639	0.171	0.0948775663324466	preGC_IIc	0.511071454701216	2.35516799401482	7.23442026275189e-32
C19orf48	coelEpi	0.454	0.31505746285045	0.543	0.324534479230612	sKITLG	0.510915026764214	1.12536349507536	1.96394454054412e-17
LRP2	coelEpi	0.131	0.0121513798404216	0.085	0.0202578268876611	ovarianSurf	0.510797040174759	3.89921404713556	2.41842317505883e-72
CYP2S1	coelEpi	0.138	0.0163970426762316	0.076	0.0246913580246914	ovarianSurf	0.510779672427524	3.70130197411249	1.63176759088524e-66
THUMPD1	coelEpi	0.294	0.168216089598126	0.274	0.176795580110497	ovarianSurf	0.509431771769033	1.7327611284661	8.12234022604021e-20
SFRP1	coelEpi	0.552	0.386282116975331	0.811	0.397585430734602	Sertoli_WFDC2	0.509134687236779	0.922345447892715	4.73147026308544e-23
SNCAIP	coelEpi	0.158	0.0313300636849425	0.139	0.0399699884046109	sLGR5_female	0.508700970625078	3.21962639636125	1.00813611905692e-52
LMNB1	coelEpi	0.254	0.126345069907035	0.362	0.135052179251074	ovarianSurf	0.50853189181142	2.00209406224968	4.06851273274037e-24
NECTIN2	coelEpi	0.739	0.485249981699729	0.695	0.50255780642521	ovarianSurf	0.508464965314307	0.688044608003122	2.19049759076894e-54
TMEM176B	coelEpi	0.349	0.224507722714296	0.465	0.232999113293773	Sertoli	0.508395500229402	1.4567206310298	1.44011079765992e-16
LDOC1	coelEpi	0.776	0.500768611375448	0.736	0.519541641088602	sLGR5_female	0.50813125287881	0.654808315565476	2.92583865826095e-65
LGI2	coelEpi	0.12	0.00680770075397116	0.02	0.0145283404951913	sKITLG	0.507798482427461	4.23165402022884	5.6231370113374e-82
AKAP12	coelEpi	0.323	0.199180147866188	0.547	0.207625673555692	sPAX8e	0.50776196482701	1.57201846695669	1.69638201299568e-17
ASMTL	coelEpi	0.292	0.167337676597614	0.266	0.175840665711752	Sertoli_WFDC2	0.507547684712226	1.73817700243913	1.46730828404749e-19
SLC44A2	coelEpi	0.378	0.252836541980821	0.45	0.261373712570766	sLGR5_male	0.50720192970836	1.34180404684751	9.10172510004988e-16
IL17B	sKITLG	0.481	0.0405534001903228	0.278571428571429	0.0705954573357888	sLGR5_male	1.27502973999486	2.6507894802388	5.84803603052203e-315
VSNL1	sKITLG	0.525	0.0739330942097943	0.19	0.104699543005252	sPAX8m	1.18474677610641	2.25666052591697	3.10402281421361e-268
MFAP4	sKITLG	0.699	0.161481589927531	0.612	0.198144737739581	coelEpi	1.13151150413992	1.61875751665225	4.6653772980054e-279
NRK	sKITLG	0.783	0.225898543298441	0.689285714285714	0.263897414910306	sLGR5_male	1.04310855285916	1.33219483123775	1.05529122788378e-275
HMGA2	sKITLG	0.494	0.108557206646658	0.546428571428571	0.134847554737058	sLGR5_male	0.989783519207218	2.00361036276765	6.05962256676396e-178
CRABP2	sKITLG	0.691	0.226118146548569	0.792857142857143	0.257826887661142	sLGR5_male	0.93662762605132	1.35546689732463	9.63712319207515e-193
PCOLCE	sKITLG	0.499	0.132933167410878	0.692	0.157901916649615	coelEpi	0.921044828489547	1.84578121941793	9.2211125385355e-150
AC006974.2	sKITLG	0.436	0.109289217480419	0.419	0.131573562512789	preGC_IIb	0.884290479442185	2.02818917303254	1.05037944515049e-133
DES	sKITLG	0.542	0.174877388185345	0.44	0.199918150194393	coelEpi	0.872537206913236	1.60984724522737	8.32236248393059e-135
STRA6	sKITLG	0.544	0.182051094356196	0.785714285714286	0.206738967328286	sLGR5_male	0.857506280030971	1.57629830888046	2.50602788751163e-129
AC027031.2	sKITLG	0.401	0.0994070712246541	0.238	0.119978173385172	ovarianSurf	0.850298621921483	2.12044544120071	1.16576179237981e-121
DLK1	sKITLG	0.448	0.129419515408828	0.695538057742782	0.151149307687061	FetalLeydig-like	0.846490237855848	1.88948713807109	9.75817211070301e-119
AMOT	sKITLG	0.407	0.104604348144353	0.578571428571429	0.125230202578269	sLGR5_male	0.845583857206436	2.07760161475783	2.08573010911905e-119
KDR	sKITLG	0.473	0.151599443671766	0.479	0.173521587886229	preGC_IIa	0.828437392679213	1.75145326147825	1.86049139855064e-112
SNAI2	sKITLG	0.335	0.0674913988727033	0.296428571428571	0.0857376713730305	sLGR5_male	0.822915097411586	2.45646297734802	6.23718885239571e-119
FAM89A	sKITLG	0.566	0.210745919039602	0.45	0.234977150262601	preGC_IIb	0.819719123409626	1.44826700249051	2.54680848700513e-118
RND3	sKITLG	0.424	0.13271356416075	0.364285714285714	0.152581679285178	sLGR5_male	0.797143415166009	1.88005522444813	2.89157937797907e-100
LHX9	sKITLG	0.813	0.349535173120562	0.819	0.381147261441921	ovarianSurf	0.784194975501428	0.964569465561412	1.85048205851786e-181
APCDD1L	sKITLG	0.401	0.122538613571481	0.439285714285714	0.141531955528272	sLGR5_male	0.78404713106266	1.95522975327347	3.56897554361198e-96
BZW2	sKITLG	0.57	0.232852646219164	0.435714285714286	0.255848850692313	sLGR5_male	0.777006008438135	1.36316843585638	1.7202010337367e-103
CNTNAP4	sKITLG	0.672	0.290827904252983	0.735	0.316826955869313	preGC_IIb	0.772396487311899	1.14939953469033	2.36086038093683e-123
PLCB1	sKITLG	0.596	0.254959373398726	0.579	0.278221130891481	preGC_IIb	0.762486071785941	1.27933904662071	1.00049317191355e-102
TMSB15A	sKITLG	0.472	0.19046921894444	0.653571428571429	0.20967191869586	sLGR5_male	0.737363715588349	1.56221126183972	5.68235352097187e-80
CDH7	sKITLG	0.465	0.190762023277945	0.502	0.209467294181843	preGC_IIb	0.726882264456311	1.56318766549744	3.81092772676445e-76
CCND3	sKITLG	0.553	0.247858868311251	0.464566929133858	0.268671986904031	FetalLeydig-like	0.726788004700949	1.31426402296736	8.58740811346934e-84
DIRAS3	sKITLG	0.596	0.274138057243247	0.676	0.29609167178228	preGC_IIb	0.725383357700648	1.21708617063867	6.5015565682631e-90
KITLG	sKITLG	0.65	0.308322963179855	0.775	0.33162812904986	preGC_IIb	0.717431670190427	1.1037410310622	3.06811748696115e-98
CYTL1	sKITLG	0.455	0.18973720811068	0.638	0.207830298069709	coelEpi	0.714820200163413	1.57103340695256	8.66199988925898e-72
TAGLN3	sKITLG	0.281	0.0638313447039016	0.222	0.0786440215537821	preGC_IIb	0.714533450053047	2.54282366566921	7.99689783733092e-87
ISLR	sKITLG	0.397	0.149842617670742	0.446	0.166700770752336	coelEpi	0.711247281661771	1.79155486564678	1.33791063410898e-70
CRB1	sKITLG	0.232	0.0330868896859674	0.135	0.0466543891958257	preGC_IIb	0.711077278249246	3.06498826831571	2.79670475853293e-102
RGS2	sKITLG	0.393	0.148451797086597	0.392857142857143	0.165131982811541	sLGR5_male	0.707797019997081	1.80101022900021	1.34094824054837e-69
BCAS3	sKITLG	0.463	0.199033745699436	0.442857142857143	0.217038401200464	sLGR5_male	0.707316292369766	1.52768097704053	1.17267543877207e-69
MYC	sKITLG	0.441	0.183954322523973	0.376	0.201486938135189	preGC_IIb	0.7064955487755	1.60203072284694	9.18572604223548e-69
PRKG1	sKITLG	0.325	0.0999194788082864	0.299	0.115271809562786	coelEpi	0.702150272856872	2.16046237802115	1.56789993760297e-73
PCDH18	sKITLG	0.389	0.148744601420101	0.289	0.165131982811541	preGC_IIa	0.70059297908108	1.80101022900021	2.2536902675926e-67
IGF2BP2	sKITLG	0.587	0.286509040333797	0.617857142857143	0.307004979196508	sLGR5_male	0.69318320052281	1.18089131264533	1.02386828925383e-77
HOPX	sKITLG	0.823	0.40568040406998	0.754	0.434145010572267	preGC_IIb	0.686692003481181	0.834376674946758	6.94138996805958e-148
FBLN1	sKITLG	0.423	0.180806675938804	0.525	0.197326239683514	sLGR5_male	0.686485380646981	1.62289688096213	3.79890975227937e-62
MLLT11	sKITLG	0.523	0.253202547397701	0.717857142857143	0.271604938271605	sLGR5_male	0.681681704787286	1.30340670131412	8.10755340196979e-66
DPP10	sKITLG	0.723	0.365932215796794	0.765	0.390287156401337	sLGR5_female	0.680250826413295	0.940872512328209	2.75669889335921e-105
MEG3	sKITLG	0.838	0.417612180660274	0.910714285714286	0.446286065070595	sLGR5_male	0.676094319835425	0.806795131068526	1.89950684446632e-151
PYCR1	sKITLG	0.368	0.144279335334163	0.388	0.159538912761749	coelEpi	0.675452010322303	1.83546741935409	3.22473479093992e-60
IDH2	sKITLG	0.44	0.199838957616573	0.472	0.216219903144397	sLGR5_female	0.673842100389453	1.53145931906694	2.00227041457213e-58
PLAC1	sKITLG	0.473	0.22370251079716	0.839285714285714	0.240706636655071	sLGR5_male	0.673635419350396	1.42417636226299	1.4189259081184e-59
MMP2	sKITLG	0.667	0.342873874533343	0.615	0.364981924834595	coelEpi	0.672274267567182	1.00790744762696	6.4958661813079e-87
VCAN	sKITLG	0.561	0.282775785081619	0.845	0.30175295000341	Sertoli_WFDC2	0.672160266574949	1.19814664273609	2.9341184085206e-67
SYT1	sKITLG	0.449	0.208110680038065	0.475	0.224541300047746	sLGR5_male	0.670669335239446	1.4936956241413	1.06371018511441e-57
PSAT1	sKITLG	0.625	0.321279554937413	0.562	0.341995771093377	preGC_I	0.670598067012516	1.07295690722003	3.46879779739754e-77
CDKN1C	sKITLG	0.744	0.38335407364029	0.668	0.407953072778119	sLGR5_female	0.667072727896918	0.896603128893708	1.5128262574836e-107
COL1A1	sKITLG	0.669	0.347485542786033	0.935	0.369415455971625	coelEpi	0.666212525430577	0.995833371346154	2.19467162442809e-85
PLAGL1	sKITLG	0.838	0.423761071663861	0.66	0.452015551463065	sPAX8e	0.665404425446331	0.794038693850038	2.52233445539444e-147
SMC5	sKITLG	0.59	0.304662909011053	0.502	0.324125230202578	sLGR5_female	0.664708941688512	1.12662532489578	3.65641916892235e-69
LRRC17	sKITLG	0.466	0.223922114047288	0.409	0.240433803969716	preGC_IIb	0.664194679342423	1.4253104706919	2.22777726244502e-56
HIST3H2A	sKITLG	0.553	0.28387380133226	0.434	0.302230407202783	preGC_IIb	0.661700784950543	1.19656561473878	5.38575268009774e-63
PLIN2	sKITLG	0.506	0.253641753897958	0.535714285714286	0.270854648386877	sLGR5_male	0.660923515132349	1.30617295480701	5.74942292559432e-58
PRRX1	sKITLG	0.347	0.135422004245663	0.459	0.149853352431621	coelEpi	0.658640045403118	1.89809811355365	2.27484004248615e-56
CCL21	sKITLG	0.31	0.106580777395505	0.313	0.120455630584544	preGC_IIc	0.656106879480051	2.11647380477436	1.02257359451267e-59
CACHD1	sKITLG	0.409	0.186296757192006	0.347	0.201486938135189	sLGR5_female	0.655230565644398	1.60203072284694	1.34056553316391e-52
AP002884.1	sKITLG	0.372	0.157162726008345	0.5	0.171816383602756	sLGR5_male	0.655214354365863	1.76132890958565	1.20687265351208e-53
MBNL3	sKITLG	0.757	0.397115877314984	0.64	0.421662915217243	preGC_IIb	0.653706640877376	0.863549063246203	2.25607728488936e-107
RPP25	sKITLG	0.338	0.131542346826733	0.314	0.145624445808608	sLGR5_female	0.651232799973132	1.92672426027554	7.99067896475931e-55
LDB2	sKITLG	0.241	0.0552668179489056	0.22	0.0679353386535707	sPAX8e	0.648096941733234	2.68919892835367	3.23690949569625e-72
DPEP1	sKITLG	0.451	0.223775711880536	0.68	0.239274265056954	ovarianSurf	0.644995319433232	1.43014483244619	3.93964275668134e-50
GEM	sKITLG	0.246	0.0601712905350999	0.185714285714286	0.0728463269899734	sLGR5_male	0.644373178938859	2.61940316641812	2.9679964689345e-69
SERPINE2	sKITLG	0.838	0.437888880755435	0.917857142857143	0.465179728531478	sLGR5_male	0.641347742614434	0.765331435100757	5.98996277812691e-138
TCHP	sKITLG	0.518	0.273772051826367	0.551	0.290430393561149	preGC_IIb	0.640450714371147	1.23639134048484	5.36475447792005e-53
HMGB3	sKITLG	0.526	0.280140546080082	0.525	0.296910169838347	sLGR5_male	0.638735288947019	1.21432564438597	3.01633256505476e-53
FIRRE	sKITLG	0.258	0.0740794963765464	0.325	0.0866243776004365	sLGR5_male	0.631112893673292	2.44617400648563	4.7215738009186e-61
PAICS	sKITLG	0.672	0.371275894883244	0.592	0.391787736170793	preGC_IIb	0.629687570541257	0.937035075210204	3.70287011070535e-74
GLIPR2	sKITLG	0.365	0.168216089598126	0.482142857142857	0.181638360275561	sLGR5_male	0.622594224045381	1.70573760012433	3.23365647960448e-44
PLK2	sKITLG	0.66	0.369519068882219	0.769	0.389332242002592	preGC_IIb	0.622592656845415	0.943322207341537	3.15131793510892e-69
LINC00665	sKITLG	0.521	0.287533855501061	0.535714285714286	0.303458154286884	sLGR5_male	0.621298520223888	1.19251155513222	8.25483919379255e-48
CREB3L1	sKITLG	0.377	0.179196252104531	0.415	0.192688084032467	coelEpi	0.620799318468862	1.64668254235772	3.34142367709738e-43
TNNI1	sKITLG	0.291	0.106214771978625	0.364	0.11881863447241	coelEpi	0.619875695301012	2.13015702852582	1.16470591454563e-50
PSMD9	sKITLG	0.71	0.396676670814728	0.768	0.41804788213628	sLGR5_female	0.619233104741298	0.872159302452533	1.57325187909432e-80
FLRT3	sKITLG	0.489	0.267476758656028	0.558	0.282586453857172	sLGR5_female	0.617983893747962	1.26377074386086	2.02060627972949e-44
HMGA1	sKITLG	0.302	0.116902130151526	0.471428571428571	0.129527317372621	sLGR5_male	0.617246769488045	2.04386347512598	3.42681695321437e-48
NPW	sKITLG	0.296	0.112802869482468	0.568	0.125298410749608	coelEpi	0.614808901814049	2.07705710072314	2.88707200240561e-48
BAMBI	sKITLG	0.527	0.295805577922553	0.438	0.311574926676216	preGC_IIb	0.614542834035474	1.16611543460242	1.73123466467124e-46
NME1	sKITLG	0.441	0.234097064636557	0.456	0.248209535502353	Sertoli_WFDC2	0.614525556851812	1.3934819883261	2.77673301777898e-41
OLFM3	sKITLG	0.258	0.0805211917136374	0.246428571428571	0.0926266966782621	sLGR5_male	0.613827892477463	2.37917787781962	5.17010392651563e-55
SNHG15	sKITLG	0.46	0.249030085645268	0.424	0.263419957710934	preGC_IIb	0.61364263255691	1.3340057229498	1.09295040986745e-41
OSBPL1A	sKITLG	0.521	0.292877534587512	0.56	0.308437350794625	preGC_IIb	0.612819233745282	1.17623653310035	1.84316087424093e-45
C19orf48	sKITLG	0.543	0.308542566429983	0.537	0.324534479230612	ovarianSurf	0.611072377825921	1.12536349507536	3.90150310725476e-47
BCL2	sKITLG	0.428	0.226630554132201	0.455	0.240365595798377	sLGR5_female	0.610154317121579	1.42559419888219	7.94484326619508e-40
C1orf53	sKITLG	0.484	0.269160383573677	0.519	0.283814200941273	preGC_IIb	0.609566770846376	1.25943547695532	8.23757799305312e-42
ALG3	sKITLG	0.415	0.216894810043189	0.348	0.230407202782893	ovarianSurf	0.609181441756765	1.46790708857052	1.92851113076097e-39
TDGF1	sKITLG	0.34	0.155113095673816	0.416	0.16772389332242	sLGR5_female	0.607048288865505	1.78543614372207	3.07274229691549e-41
MRPL15	sKITLG	0.475	0.265134323987995	0.4	0.279448877975581	sLGR5_male	0.605594556485912	1.27493590839139	3.05092900552861e-40
DSEL	sKITLG	0.7	0.400775931483786	0.796	0.421185458017871	preGC_IIc	0.60527741710946	0.864682024442087	2.66944102045782e-73
MPP6	sKITLG	0.466	0.259205036234536	0.538	0.273310142555078	sLGR5_female	0.604471003090788	1.29714807530212	1.68057683412915e-39
CCDC73	sKITLG	0.531	0.30620013176195	0.738	0.321533319691699	sLGR5_female	0.602501328396802	1.13465410244219	1.3526980408975e-43
TATDN1	sKITLG	0.561	0.326037625356855	0.461	0.342063979264716	preGC_IIb	0.60181694938919	1.07275748554223	1.26074931256246e-46
DAZAP1	sKITLG	0.428	0.232340238635532	0.382142857142857	0.245685833162813	sLGR5_male	0.600784310566612	1.40370166020236	2.42200141869436e-37
FKBP7	sKITLG	0.418	0.225678940048313	0.445	0.238796807857581	coelEpi	0.598635466763144	1.4321422649836	1.16037221648718e-36
HIST1H2AC	sKITLG	0.583	0.342141863699583	0.647	0.358570356728736	sLGR5_female	0.59794251452427	1.02563038511882	2.2924425561638e-48
NOB1	sKITLG	0.557	0.326110826440231	0.535	0.341859354750699	ovarianSurf	0.597859219546724	1.07335586992231	4.45069463571111e-45
CPNE7	sKITLG	0.226	0.0597320840348437	0.17	0.0710729145351613	sLGR5_female	0.597555065779239	2.64404896362495	6.44912388451044e-58
ADAMTS19	sKITLG	0.281	0.107678793646146	0.375	0.119500716185799	sLGR5_male	0.596965648958182	2.12443291444193	5.50984384858712e-45
TPM2	sKITLG	0.499	0.288192665251446	0.859	0.302571448059477	coelEpi	0.596523480896535	1.19543783746801	2.40435428704904e-39
GNL3	sKITLG	0.462	0.26191347631945	0.401	0.275561012209263	preGC_IIb	0.595493151322178	1.28894621498307	5.56602520953017e-37
EIF2A	sKITLG	0.495	0.286069833833541	0.493	0.300320578405293	ovarianSurf	0.595437866190343	1.20290478018251	8.86541227496547e-39
MEF2C	sKITLG	0.384	0.199765756533197	0.429	0.212332037378078	sLGR5_female	0.595047941950716	1.54960401549666	6.34573318729637e-36
ATP1A2	sKITLG	0.214	0.0509479540297196	0.296428571428571	0.062069435918423	sLGR5_male	0.594813339495457	2.77950158642737	6.13157027035691e-61
DPYSL4	sKITLG	0.237	0.0699070346241124	0.292857142857143	0.0813041402360003	sLGR5_male	0.594765326180174	2.50955833831297	1.11373316466621e-53
MME	sKITLG	0.426	0.234609472220189	0.685714285714286	0.247663870131642	sLGR5_male	0.594560878987194	1.39568281452393	1.07967916828997e-35
EMX2OS	sKITLG	0.471	0.272015225825342	0.549	0.285587613396085	preGC_IIb	0.590260223781906	1.25320641991912	4.74884238087462e-36
GPC3	sKITLG	0.289	0.118073347485543	0.722	0.129731941886638	coelEpi	0.590220348478716	2.04228494283293	1.09012502701309e-41
WNT5A	sKITLG	0.317	0.143547324500403	0.345	0.155378214310074	coelEpi	0.59022009429217	1.86189304193114	2.24011232857388e-38
NR2F2-AS1	sKITLG	0.376	0.197276919698412	0.510714285714286	0.209467294181843	sLGR5_male	0.587758562227038	1.56318766549744	3.20575043768741e-34
IGF2BP1	sKITLG	0.299	0.12846790132494	0.5	0.140099583930155	sLGR5_male	0.587655136839478	1.96540179544976	1.3212096320317e-39
TEAD2	sKITLG	0.502	0.296391186589562	0.685714285714286	0.310415387763454	sLGR5_male	0.587261646796654	1.16984391792162	3.64956898044953e-37
ARMT1	sKITLG	0.542	0.323621989605446	0.622	0.338517154355092	preGC_I	0.587083836610147	1.08318051035082	1.43113805957372e-40
CCNB1IP1	sKITLG	0.552	0.330649293609545	0.484	0.345747220517018	coelEpi	0.586250135801185	1.06204734746592	2.09623273489516e-41
SOX11	sKITLG	0.275	0.107312788229266	0.265	0.118750426301071	preGC_IIb	0.585951092696771	2.13073124617008	1.49302179753175e-42
PARD6G-AS1	sKITLG	0.217	0.0566576385330503	0.162	0.0675942977968761	sLGR5_female	0.584648268398996	2.69423165160828	4.12604819098653e-56
MEIS2	sKITLG	0.468	0.273479247492863	0.638	0.286747152308847	coelEpi	0.584604284444586	1.24915445394142	1.73441669474433e-34
C3orf58	sKITLG	0.517	0.308688968596735	0.727	0.322897483118478	sLGR5_female	0.584427344661861	1.13042039586434	1.38132211840722e-37
COL14A1	sKITLG	0.334	0.162506405094795	0.422	0.174203669599618	sLGR5_female	0.583675069881491	1.74753014934578	3.74487372026642e-35
ZNRD1	sKITLG	0.496	0.294853963838665	0.461	0.308573767137303	preGC_IIb	0.583193996956318	1.17579434870225	1.02681682657464e-35
TSHZ2	sKITLG	0.352	0.179269453187907	0.499	0.191051087920333	coelEpi	0.582635472558711	1.65521441067816	8.58293325253458e-34
EXTL2	sKITLG	0.456	0.265719932655003	0.402	0.278698588090853	preGC_IIb	0.582596731215678	1.2776244105607	1.77428439782596e-33
CRLF1	sKITLG	0.204	0.0469218944440378	0.317857142857143	0.0576359047813928	sLGR5_male	0.582136349950543	2.85360955858109	7.27501213345492e-60
ARRDC3	sKITLG	0.423	0.240611961057024	0.446428571428571	0.253052315667417	sLGR5_male	0.58126926983246	1.37415903033678	2.70114387654695e-32
CXCL12	sKITLG	0.288	0.121953004904473	0.46	0.133278766796262	sPAX8e	0.580409957760635	2.01531235333554	6.57751373203374e-39
SLC25A38	sKITLG	0.597	0.36249176487812	0.622	0.378487142759703	granulosa	0.580029185840581	0.971573175612363	2.00619814965639e-45
WASF1	sKITLG	0.502	0.301368860259132	0.510714285714286	0.315053543414501	sLGR5_male	0.579816363104845	1.15501267550766	2.79162948962322e-35
SHMT2	sKITLG	0.635	0.385257301808067	0.723	0.402291794556988	preGC_IIb	0.578216773817532	0.910577596563043	4.90239300871589e-51
LIMD2	sKITLG	0.299	0.133299172827758	0.442857142857143	0.144601323238524	sLGR5_male	0.57819867066339	1.93377481827221	7.03443709950042e-37
CLCN5	sKITLG	0.507	0.306346533928702	0.572	0.320032739922243	granulosa	0.577641311915604	1.1393319761649	4.15416601952003e-35
TSC22D3	sKITLG	0.613	0.374203938218286	0.832142857142857	0.390491780915354	sLGR5_male	0.5764335431572	0.940348357515824	7.6065911221858e-47
IMMP2L	sKITLG	0.404	0.228167776883098	0.467857142857143	0.24016097128436	sLGR5_male	0.576284130180418	1.42644586678321	6.24684766665146e-31
DAP	sKITLG	0.465	0.27684649732816	0.392	0.28968010367642	coelEpi	0.576124795865622	1.23897805562499	2.93741355999827e-32
ARHGAP29	sKITLG	0.479	0.287314252250933	0.667	0.300388786576632	sPAX8e	0.576082612597837	1.20267768809569	6.28582056705137e-33
CLEC11A	sKITLG	0.507	0.307883756679599	0.602	0.32146511152036	coelEpi	0.575377193320369	1.13486625901453	1.53555050448395e-34
TMPO	sKITLG	0.796	0.462777249103287	0.731	0.485505763590478	preGC_IIb	0.575161039415029	0.722564119868127	2.58697288223239e-94
CHORDC1	sKITLG	0.447	0.26374350340385	0.482	0.276243093922652	sLGR5_female	0.575053889549443	1.28647402583768	2.6037394603166e-31
ZNF738	sKITLG	0.422	0.244125613059073	0.575	0.256258099720347	sLGR5_male	0.574582599233733	1.3615701403643	1.23940565377783e-30
SORCS3	sKITLG	0.174	0.0268647975990045	0.074	0.0369006206943592	preGC_IIb	0.57411768183397	3.29952690709178	9.87907285689751e-71
SINHCAF	sKITLG	0.642	0.392138203645414	0.603571428571429	0.409180819862219	sLGR5_male	0.57368999193908	0.893598118285171	5.05951950762502e-51
EIF4A1	sKITLG	0.631	0.386721323475587	0.539	0.403383125298411	preGC_IIb	0.572865014366806	0.907868485525842	8.09912104070246e-49
DCAF13	sKITLG	0.371	0.202181392284606	0.328571428571429	0.213696200804856	sLGR5_male	0.572527161039833	1.54319989498607	1.8042542038006e-30
LYPLA1	sKITLG	0.439	0.25913183515116	0.405	0.271400313757588	sLGR5_female	0.572526404849476	1.30416037551134	1.8042542038006e-30
GTF2F2	sKITLG	0.411	0.236585901471342	0.413	0.248482368187709	Sertoli_WFDC2	0.572269572850107	1.3923833889297	5.77232559253894e-30
EXOSC5	sKITLG	0.32	0.156430715174585	0.26	0.167587476979742	ovarianSurf	0.571599940293467	1.78624981341709	5.57991346995945e-33
HIF3A	sKITLG	0.377	0.208476685454945	0.42	0.219971352568038	preGC_I	0.570875249679064	1.51425795670839	6.61722681054781e-30
ZPBP	sKITLG	0.307	0.145084547251299	0.514285714285714	0.156128504194803	sLGR5_male	0.570122290857609	1.8570758659857	9.04493663524351e-34
NRG1	sKITLG	0.267	0.107385989312642	0.274	0.118272969101698	preGC_IIb	0.569980927635607	2.13476002859778	4.95011553159791e-39
KCTD8	sKITLG	0.243	0.0853524632164556	0.357142857142857	0.0961053134165473	sLGR5_male	0.569181493791619	2.34231067403958	1.49867350679483e-43
ZNF581	sKITLG	0.414	0.241709977307664	0.389	0.253461564695451	preGC_IIb	0.568232837605878	1.37254308600454	5.21807030585811e-29
BGN	sKITLG	0.322	0.160456774760266	0.391	0.171475342746061	coelEpi	0.567787686565759	1.76331579678807	8.22918573749658e-32
RGS5	sKITLG	0.244	0.0870360881341044	0.253571428571429	0.0977423095286815	sLGR5_male	0.567402664978863	2.32542075811009	9.51340186838185e-43
ARL4A	sKITLG	0.691	0.4230290608301	0.77	0.441306868562854	sLGR5_female	0.565248225724333	0.818014798443318	1.01279406010193e-58
RAB3IL1	sKITLG	0.214	0.0610497035356123	0.118	0.0714821635631949	preGC_I	0.564597766706257	2.63830732105728	7.13026479464009e-50
ADSL	sKITLG	0.495	0.306858941512334	0.444	0.319691699065548	ovarianSurf	0.564497103067701	1.14039818801556	4.59008526716068e-31
MOB4	sKITLG	0.35	0.188492789693287	0.303571428571429	0.19950890116636	sLGR5_male	0.564163749195308	1.61189642627231	3.74187323764447e-29
WASF3	sKITLG	0.312	0.153209867506039	0.246	0.164040652070118	granulosa	0.563983993060302	1.8076410033984	1.18420369812943e-31
HSPA6	sKITLG	0.231	0.0767147353780836	0.248	0.0872382511424869	sLGR5_female	0.563434960787026	2.43911238435942	1.37202907693407e-44
CCDC34	sKITLG	0.471	0.290315496669351	0.394	0.302639656230816	Sertoli_WFDC2	0.562945056677456	1.19521243455936	2.31661681332749e-29
COL6A2	sKITLG	0.509	0.318131908352244	0.665	0.331150671850488	coelEpi	0.562537538853335	1.10518180521284	1.46758754916956e-31
KLHL4	sKITLG	0.377	0.214039967791523	0.355	0.225155173589796	preGC_I	0.562093976190072	1.49096545408507	9.33691394653085e-28
CDCA7L	sKITLG	0.548	0.345728716785008	0.623	0.359525271127481	preGC_IIc	0.560588003377516	1.02297080908306	1.91175593254865e-34
H2AFY2	sKITLG	0.61	0.383939682307298	0.75	0.399358843189414	sLGR5_male	0.559915895042933	0.917894909906447	6.28847153076043e-42
UNC5D	sKITLG	0.228	0.0756167191274431	0.171	0.0860105040583862	granulosa	0.559349173793923	2.45328584997334	5.07858121998877e-44
ANKRD46	sKITLG	0.29	0.135055998828783	0.239285714285714	0.145624445808608	sLGR5_male	0.558750035479906	1.92672426027554	1.58305047368754e-32
GMDS	sKITLG	0.287	0.132786765244126	0.263	0.143305367983084	ovarianSurf	0.557577138221767	1.94277748509326	1.43597538916663e-32
MATR3-1	sKITLG	0.456	0.282775785081619	0.437	0.294591092012823	sLGR5_female	0.557308157917769	1.22216701297756	2.10182900465593e-27
TOX3	sKITLG	0.54	0.342947075616719	0.827	0.35638769524589	preGC_IIb	0.557137498916836	1.03173610910525	7.91832681495911e-33
FH	sKITLG	0.409	0.245004026059586	0.403571428571429	0.256189891549008	sLGR5_male	0.556991065354535	1.36183634561011	2.61571714247518e-26
ST3GAL1	sKITLG	0.302	0.147719786252837	0.439	0.158242957506309	coelEpi	0.556774363825928	1.84362372127791	1.1011602777734e-30
ASXL3	sKITLG	0.292	0.138203645413952	0.232	0.14869381351886	preGC_IIb	0.556512880805298	1.90586603015513	1.08082112080839e-31
TIMM9	sKITLG	0.484	0.304882512261181	0.462	0.317099788554669	preGC_IIb	0.555892761895877	1.14853876424768	2.23674646520615e-28
SERPING1	sKITLG	0.674	0.421272234829075	0.854	0.438510333537958	coelEpi	0.555626661810893	0.824371901796578	3.67891042710159e-52
MMP14	sKITLG	0.351	0.194861283947002	0.403571428571429	0.205511220244185	sLGR5_male	0.555371381029595	1.58225464680796	6.14346002707697e-27
DNAJC2	sKITLG	0.438	0.270111997657565	0.385714285714286	0.281563331287088	sLGR5_male	0.555120270904267	1.26739787877687	2.51930668028048e-26
MRPL3	sKITLG	0.554	0.35363443378962	0.518	0.367301002660119	ovarianSurf	0.554871772376668	1.00157359634778	1.19537633901632e-33
RASL11B	sKITLG	0.394	0.233731059219676	0.705	0.244662710592729	sLGR5_female	0.554702635111957	1.40787470840598	8.71041198991308e-26
TRMT10C	sKITLG	0.465	0.291559915086743	0.422	0.303389946115545	sLGR5_female	0.554622402753649	1.19273635000785	3.81371126734037e-27
ELK1	sKITLG	0.65	0.409852865822414	0.695	0.426232862696951	preGC_I	0.554300146405969	0.852769456009183	4.68073225656221e-47
NKAIN4	sKITLG	0.176	0.0331600907693434	0.18	0.0429029397721847	coelEpi	0.554191427545857	3.14881492923782	3.16982883856431e-61
ENC1	sKITLG	0.443	0.275309274577264	0.619	0.286747152308847	granulosa	0.55337542309605	1.24915445394142	4.55927188121575e-26
TTC13	sKITLG	0.242	0.0914281531366664	0.169	0.101698383466339	ovarianSurf	0.553150016823993	2.28574387117353	1.06438468714537e-38
RABGGTB	sKITLG	0.572	0.366225020130298	0.571428571428571	0.380260555214515	sLGR5_male	0.553065993256889	0.966898589609945	3.6288885027224e-35
NOP58	sKITLG	0.545	0.349242368787058	0.479	0.362594638837733	ovarianSurf	0.552886022527295	1.01446976610513	2.79997104796446e-32
NOP56	sKITLG	0.492	0.314471854183442	0.414285714285714	0.32658072437078	sLGR5_male	0.550586434676117	1.1190781192604	1.29085928645662e-27
PDK1	sKITLG	0.462	0.292438328087256	0.718	0.304003819657595	preGC_IIb	0.55011033600217	1.19071501299171	5.44672191400243e-26
ROCK1	sKITLG	0.45	0.283214991581875	0.432142857142857	0.294591092012823	sLGR5_male	0.549975155839904	1.22216701297756	1.63865158110486e-25
NT5C3B	sKITLG	0.428	0.265939535905131	0.496428571428571	0.27699338380738	sLGR5_male	0.549449989731842	1.28376165825197	8.07891250594638e-25
HDHD5	sKITLG	0.418	0.257887416733768	0.455	0.268808403246709	preGC_IIb	0.549150178854683	1.31375640874326	1.34524541836898e-24
GATD3B	sKITLG	0.271	0.121733401654344	0.227	0.131914603369484	Sertoli_WFDC2	0.548937738189682	2.02560050992502	2.4843706421423e-32
NOP16	sKITLG	0.336	0.185052338774614	0.268	0.195348202714685	ovarianSurf	0.548678477040197	1.63297165785773	4.78520432981593e-26
PPAT	sKITLG	0.27	0.120928189737208	0.221428571428571	0.131096105313417	sLGR5_male	0.548592641030167	2.03182459640803	2.21978896725522e-32
ST6GALNAC1	sKITLG	0.356	0.203791816118879	0.484	0.214173658004229	Sertoli_WFDC2	0.548584646104804	1.54096810703597	3.99749549086679e-25
KCNMA1	sKITLG	0.229	0.0813264036307737	0.267	0.0913989495941614	sPAX8e	0.547887376095467	2.39252129299331	4.9177177710044e-40
RAB4A	sKITLG	0.388	0.233072249469292	0.403571428571429	0.243639588022645	sLGR5_male	0.547881314649447	1.41206524394187	2.91884088318063e-24
ILF3-DT	sKITLG	0.38	0.226118146548569	0.333	0.236614146374736	preGC_IIb	0.547703324808036	1.44132453896851	2.57512608595228e-24
ELP6	sKITLG	0.476	0.30510211551131	0.485714285714286	0.316758747697974	sLGR5_male	0.54721666532535	1.14961484312048	5.69004905543263e-26
PLEKHO1	sKITLG	0.354	0.20320620745187	0.385714285714286	0.21349157629084	sLGR5_male	0.546631897451039	1.54415790240407	9.74593893066375e-25
ABCE1	sKITLG	0.39	0.236219896054462	0.374	0.246708955732897	ovarianSurf	0.545822922054605	1.39954595398617	8.7295202106882e-24
ARMCX6	sKITLG	0.481	0.309860185930752	0.464285714285714	0.321533319691699	sLGR5_male	0.545768623274692	1.13465410244219	6.71577303516646e-26
DEPP1	sKITLG	0.241	0.0938437888880755	0.339285714285714	0.103881044949185	sLGR5_male	0.545746628763388	2.2645088330431	1.16999585268612e-36
WDR12	sKITLG	0.307	0.158992753092746	0.285714285714286	0.169088056749199	sLGR5_male	0.545642045748244	1.77733565390307	2.44503423118499e-27
BISPR	sKITLG	0.199	0.0547544103652734	0.145	0.0645931382579633	sPAX8e	0.545189771457685	2.73964709275219	4.91381935018566e-48
IQCG	sKITLG	0.506	0.328453261108264	0.505	0.34056339949526	preGC_IIb	0.545039911571454	1.07715397543766	3.04131760369866e-27
FKBP10	sKITLG	0.642	0.412195300490447	0.653571428571429	0.427869858809085	sLGR5_male	0.545017039014257	0.848936197841521	4.10262073776454e-43
GNG2	sKITLG	0.426	0.26762316082278	0.746	0.278425755405498	Sertoli_WFDC2	0.54468523693417	1.27860384256847	9.96891580991211e-24
NIFK	sKITLG	0.541	0.352609618622356	0.544	0.365459382033968	ovarianSurf	0.544570673486037	1.00660013583371	6.30116444823301e-30
PSPC1	sKITLG	0.358	0.208257082204817	0.335714285714286	0.218470772798581	sLGR5_male	0.54455488700582	1.52110303632911	4.04736079790807e-24
KCNQ1OT1	sKITLG	0.531	0.346241124368641	0.525	0.358843189414092	sLGR5_female	0.54420585541416	1.02486978420746	5.7859777448415e-29
TMEM167A	sKITLG	0.519	0.338115804113901	0.599	0.350453584339404	Sertoli_WFDC2	0.544185517291318	1.04852700826844	5.43074410820342e-28
G3BP1	sKITLG	0.587	0.381963253056145	0.502	0.395948434622468	sLGR5_female	0.543838648290282	0.926471291806273	1.09291737830124e-34
YWHAG	sKITLG	0.468	0.30158846350926	0.444	0.312939090102994	preGC_IIb	0.543697459198453	1.161746707689	8.35360851794782e-25
DDX21	sKITLG	0.483	0.313081033599297	0.431	0.32467089557329	Sertoli_WFDC2	0.543347584298282	1.1249432387128	1.83610709162981e-25
TNPO1	sKITLG	0.494	0.321133152770661	0.575	0.3329240843053	sLGR5_male	0.543321350285252	1.09984079005112	4.42009790192068e-26
JAGN1	sKITLG	0.522	0.340824244198814	0.465	0.353181911192961	coelEpi	0.54328299737718	1.04077202562678	5.14171082784144e-28
MICU1	sKITLG	0.585	0.381231242222385	0.621428571428571	0.395129936566401	sLGR5_male	0.54319625968236	0.92854061484164	2.74984361190035e-34
NKD1	sKITLG	0.232	0.0863772783837201	0.207	0.0963099379305641	sLGR5_female	0.542922634149338	2.34018376788508	9.15949541665176e-38
CLK1	sKITLG	0.566	0.369811873215724	0.498	0.383193506582089	sLGR5_female	0.542915790903127	0.959215178274076	4.96065139757049e-32
PWP1	sKITLG	0.496	0.323768391772198	0.44	0.335515994816179	ovarianSurf	0.541674481974891	1.09208564914292	7.78118364000237e-26
KLHDC8A	sKITLG	0.467	0.302393675426396	0.495	0.313621171816384	granulosa	0.541518947447269	1.15956948061514	2.78726142101658e-24
NNAT	sKITLG	0.295	0.149623014420613	0.433	0.159538912761749	sLGR5_female	0.541462888709455	1.83546741935409	2.09924674464601e-27
TIMM17A	sKITLG	0.486	0.316741087768099	0.45	0.328285928654253	sLGR5_male	0.541340973884685	1.11387031663516	3.54619004820406e-25
MVB12A	sKITLG	0.625	0.405607202986604	0.559	0.42057158447582	preGC_IIb	0.541337860932606	0.866140577492169	2.37640582219979e-39
FXYD5	sKITLG	0.238	0.0930385769709392	0.269	0.10292613055044	ovarianSurf	0.541151007066559	2.27374372717042	6.73806953334326e-36
JPH4	sKITLG	0.248	0.10299392431008	0.332142857142857	0.112884523565923	sLGR5_male	0.540984694735521	2.1813898981271	7.2647813208058e-34
TFAP4	sKITLG	0.255	0.110240831564307	0.206	0.120114589727849	ovarianSurf	0.540423814747725	2.11930907744206	1.84788406621608e-32
THOC3	sKITLG	0.641	0.415050142742113	0.577	0.430461769319965	sLGR5_female	0.54029682595093	0.842896764354025	1.11716529933681e-41
PUM3	sKITLG	0.384	0.235121879803821	0.378571428571429	0.245276584134779	sLGR5_male	0.539661615493154	1.40536879034675	1.83792731420235e-22
C11orf1	sKITLG	0.404	0.252690139814069	0.393	0.2630107086829	preGC_IIb	0.539566454203963	1.33556053020783	2.27970575030765e-22
EMX2	sKITLG	0.711	0.450479467096113	0.809	0.46824909624173	preGC_IIb	0.539474710960433	0.758754867736193	7.33859339008135e-56
DDX56	sKITLG	0.407	0.255398579898983	0.417857142857143	0.265739035536457	sLGR5_male	0.539372892118566	1.32524052117584	2.4352331209518e-22
C20orf96	sKITLG	0.382	0.234170265719933	0.442857142857143	0.244253461564695	sLGR5_male	0.538447647689016	1.40954881593983	3.22621013319005e-22
ACOT13	sKITLG	0.461	0.300270844008491	0.493	0.311233885819521	preGC_IIb	0.538084088910007	1.16721060501086	2.74330841101417e-23
PRPF38B	sKITLG	0.564	0.372373911133885	0.504	0.385444376236273	sLGR5_female	0.53769412987795	0.953358386308421	1.42334502898054e-30
MTHFD2	sKITLG	0.224	0.0810335992972696	0.16	0.090785076052111	Sertoli_WFDC2	0.537434322329666	2.39926036754315	5.68941262544213e-38
CCDC59	sKITLG	0.491	0.323402386355318	0.488	0.33483391310279	preGC_IIb	0.537213240073184	1.09412065188021	1.51811352425519e-24
RHOG	sKITLG	0.418	0.266305541322012	0.507142857142857	0.276652342950685	sLGR5_male	0.537127341798909	1.28499364066725	5.92270531450332e-22
WDR33	sKITLG	0.56	0.370543884049484	0.639285714285714	0.383466339267444	sLGR5_male	0.536761923304201	0.958503434471787	6.18342618276978e-30
RAMMET	sKITLG	0.477	0.313520240099553	0.560714285714286	0.32467089557329	sLGR5_male	0.536597924866005	1.1249432387128	1.12677911421239e-23
MYO1B	sKITLG	0.29	0.147500183002708	0.307142857142857	0.157219834936225	sLGR5_male	0.53653196684718	1.85011023050752	1.17037502686275e-26
WDR77	sKITLG	0.343	0.199472952199693	0.349	0.209262669667826	sLGR5_female	0.536508603043733	1.56416502345112	7.64168814188987e-23
TMEM109	sKITLG	0.519	0.343825488617232	0.596	0.35577382170384	coelEpi	0.536365782730192	1.03346008233178	3.27579252260722e-26
SLC35F2	sKITLG	0.344	0.200863772783837	0.553571428571429	0.210626833094605	sLGR5_male	0.535837542528998	1.5576672747936	1.20190791967903e-22
CCAR1	sKITLG	0.601	0.396237464314472	0.575	0.410203942432303	sLGR5_female	0.535551594256264	0.89110082238979	1.91120110787027e-34
LRRC42	sKITLG	0.443	0.28848546958495	0.489285714285714	0.299024623149853	sLGR5_male	0.534802605288513	1.20722935731041	5.68506012211764e-22
DCN	sKITLG	0.465	0.306273332845326	0.854	0.317099788554669	coelEpi	0.534070525375171	1.14853876424768	1.3928559544703e-22
MRPL42	sKITLG	0.506	0.336578581363004	0.5	0.34813450651388	sLGR5_male	0.533914178622301	1.05516636091364	9.47825835777441e-25
AAAS	sKITLG	0.406	0.2583998243174	0.407142857142857	0.268467362390014	sLGR5_male	0.533900526673045	1.31502592776612	3.67139464007453e-21
RP9	sKITLG	0.467	0.308103359929727	0.5	0.31894140918082	sLGR5_male	0.533663252182725	1.14274786334631	1.40079575980596e-22
LGR4	sKITLG	0.384	0.239440743723007	0.402	0.249300866243776	granulosa	0.533412408481684	1.38909481375439	4.17756969133861e-21
NCBP2	sKITLG	0.491	0.326257228606983	0.453571428571429	0.337494031785008	sLGR5_male	0.53332785914111	1.08620745242589	1.04710489204638e-23
ACTL6A	sKITLG	0.416	0.267696361906156	0.457142857142857	0.277811881863447	sLGR5_male	0.532817408568578	1.28081107828985	5.11900296128078e-21
SNHG12	sKITLG	0.314	0.173852573018081	0.285	0.183411772730373	preGC_IIb	0.532550760316192	1.6960215296694	1.38203508191093e-23
BMP4	sKITLG	0.246	0.105189956811361	0.379	0.114794352363413	coelEpi	0.532494795969875	2.16461299174746	8.44406010193446e-32
TMEM69	sKITLG	0.337	0.196398506697899	0.310714285714286	0.205988677443558	sLGR5_male	0.532437783466871	1.57993407556935	3.41828036603739e-22
NFYC	sKITLG	0.464	0.306712539345582	0.471428571428571	0.317440829411363	sLGR5_male	0.532423222723277	1.14746384207603	3.41828036603739e-22
SP3	sKITLG	0.366	0.22443452163092	0.444	0.234090444035195	sLGR5_female	0.531449467470931	1.45204772533041	5.69068754582651e-21
C20orf27	sKITLG	0.324	0.184539931190982	0.333333333333333	0.194052247459246	FetalLeydig-like	0.531239419958418	1.63962783937783	1.28948755164197e-22
UBE2V1	sKITLG	0.303	0.163750823512188	0.298	0.173248755200873	Sertoli_WFDC2	0.531167128255482	1.75302682592568	4.13461117769586e-24
DNAJB4	sKITLG	0.502	0.33591977161262	0.546	0.347247800286474	sLGR5_female	0.530973749282036	1.05771663203593	7.41153359991307e-24
ZFAND1	sKITLG	0.406	0.260888661152185	0.427	0.270786440215538	ovarianSurf	0.530408473776354	1.30642481225703	2.01221845229636e-20
ETFA	sKITLG	0.589	0.393455823146183	0.551	0.406793533865357	ovarianSurf	0.529775761421591	0.899449510053636	1.57119370184964e-31
MRPS35	sKITLG	0.532	0.357587292291926	0.538	0.369483664142964	ovarianSurf	0.529685135149154	0.995648750280366	9.65048095775452e-26
BCKDHA	sKITLG	0.337	0.198448137032428	0.33	0.207898506241048	ovarianSurf	0.529327675697392	1.57070526913173	1.70808419516503e-21
RNF146	sKITLG	0.429	0.28109216016397	0.542857142857143	0.291180683445877	sLGR5_male	0.52930504734835	1.2338112991803	1.74747179260997e-20
RBM4	sKITLG	0.539	0.362564965961496	0.601	0.374599276993384	Sertoli_WFDC2	0.529243247868167	0.981898419050403	3.15335568923576e-26
DUSP2	sKITLG	0.313	0.174950589268721	0.526	0.184366687129118	preGC_IIb	0.529229364214149	1.69082863966182	7.17686736625935e-23
SAMM50	sKITLG	0.462	0.308030158846351	0.471428571428571	0.318532160152786	sLGR5_male	0.528542707897199	1.14403183527532	2.68194980801211e-21
FGFR1	sKITLG	0.597	0.399238708732889	0.731	0.412727644771844	sLGR5_female	0.528325513511618	0.884967359315943	3.53348159905688e-32
CDC123	sKITLG	0.46	0.306712539345582	0.475	0.317167996726008	sLGR5_male	0.528228896184157	1.14832368735686	3.70958663044155e-21
MRPS2	sKITLG	0.574	0.385769709391699	0.538	0.398608553304686	preGC_IIb	0.527951087100845	0.919775413067674	2.31053038843753e-29
ZNF814	sKITLG	0.296	0.158699948759242	0.301	0.168064934179115	granulosa	0.527887838940317	1.78340486128485	6.18916229946361e-24
DCUN1D5	sKITLG	0.451	0.300124441841739	0.459	0.310415387763454	preGC_IIb	0.527599606982652	1.16984391792162	1.04777794221961e-20
SDHD	sKITLG	0.46	0.307444550179343	0.477	0.317850078439397	Sertoli_WFDC2	0.527240711056544	1.14617545881857	5.94735086661954e-21
MPDU1	sKITLG	0.406	0.263231095820218	0.371428571428571	0.272969101698383	sLGR5_male	0.527149048342602	1.29839667079459	9.75237682620551e-20
TMEM39B	sKITLG	0.315	0.178317839104019	0.278571428571429	0.187640679353387	sLGR5_male	0.527066323879312	1.67322642501369	3.13081637523612e-22
CBWD2	sKITLG	0.398	0.256789400483127	0.373	0.266421117249847	preGC_IIb	0.526425475651653	1.32267707450164	1.46878722143217e-19
XBP1	sKITLG	0.563	0.38020642705512	0.666	0.392674442398199	sLGR5_female	0.526277987910762	0.934774401262455	8.16457524441899e-28
RAE1	sKITLG	0.453	0.3026864797599	0.539285714285714	0.312939090102994	sLGR5_male	0.526271258583118	1.161746707689	1.68734340070411e-20
HSPH1	sKITLG	0.547	0.370397481882732	0.527	0.38244321669736	sLGR5_female	0.525762774128582	0.961175089814592	3.70193752734621e-26
TCERG1	sKITLG	0.481	0.324646804772711	0.479	0.335311370302162	preGC_IIb	0.525586639036375	1.09269571525234	1.59078209630388e-21
FKBP4	sKITLG	0.499	0.337896200863773	0.565	0.348884796398609	ovarianSurf	0.525453740268716	1.05301350755254	1.74330395543405e-22
SARNP	sKITLG	0.403	0.26191347631945	0.582	0.271536730100266	Sertoli_WFDC2	0.525374118763993	1.30365786293795	2.35272549140044e-19
ADI1	sKITLG	0.511	0.346680330868897	0.599	0.357888275015347	sLGR5_female	0.525070089770543	1.02753442225155	3.58248481164748e-23
DMRT1	sKITLG	0.249	0.112070858648708	0.425	0.121410544983289	sLGR5_male	0.525035808120381	2.10857754265213	3.48985157369314e-29
PPP2R2A	sKITLG	0.491	0.332479320693946	0.475	0.343291726348817	preGC_IIb	0.524964767468495	1.0691746791619	6.41561585177754e-22
TAF1D	sKITLG	0.727	0.468120928189737	0.7	0.485778596275834	ovarianSurf	0.524895688167094	0.722002322100541	1.38580242137436e-55
CYYR1	sKITLG	0.255	0.118439352902423	0.327	0.127753904917809	sPAX8m	0.524700618291015	2.05764948349418	4.14653319823768e-28
TIMP3	sKITLG	0.451	0.302393675426396	0.633	0.312529841074961	ovarianSurf	0.524537950639095	1.16305532292482	4.48675752898238e-20
PFDN4	sKITLG	0.57	0.385989312641827	0.514	0.398540345133347	preGC_IIb	0.524369529728782	0.919946543383827	4.22498066257911e-28
R3HDM4	sKITLG	0.323	0.188199985359783	0.389285714285714	0.197394447854853	sLGR5_male	0.524084063035228	1.62255127874684	4.68758256088627e-21
LAMB1	sKITLG	0.357	0.221140472878999	0.444	0.230407202782893	Sertoli_WFDC2	0.524042830619675	1.46790708857052	1.3382549029425e-19
KDSR	sKITLG	0.473	0.320401141936901	0.454	0.330809630993793	preGC_IIb	0.523238371549186	1.10621220200674	1.16473480263012e-20
BLOC1S6	sKITLG	0.454	0.305760925261694	0.535	0.315872041470568	preGC_IIb	0.523197808073711	1.15241807945751	6.73818468763392e-20
PAM16	sKITLG	0.341	0.206793060537296	0.512	0.215947070459041	Sertoli_WFDC2	0.522658183414582	1.53272194549731	7.48857284630528e-20
MRPL45	sKITLG	0.474	0.321865163604421	0.487	0.332242002591911	ovarianSurf	0.522296643110436	1.10189165213172	1.63674083348362e-20
BFAR	sKITLG	0.405	0.266085938071883	0.371	0.275561012209263	ovarianSurf	0.522023217068143	1.28894621498307	1.11811370984926e-18
LMO4	sKITLG	0.385	0.248444476978259	0.675	0.257758679489803	sLGR5_male	0.521956620796679	1.35573148258878	1.11241804627194e-18
TCF12	sKITLG	0.423	0.281531366664227	0.405	0.291180683445877	sLGR5_female	0.521902179553268	1.2338112991803	7.56991765352391e-19
LEF1	sKITLG	0.58	0.393968230729815	0.678	0.406657117522679	preGC_IIb	0.521875248786144	0.899784911700248	1.28007926719942e-28
GSTO1	sKITLG	0.529	0.361540150794232	0.563	0.37296228088125	Sertoli_WFDC2	0.521741055701951	0.986277988094424	9.07192211117556e-24
NKIRAS2	sKITLG	0.444	0.298953224507723	0.467857142857143	0.308846599822659	sLGR5_male	0.521660291328529	1.17491056605525	2.85371883226928e-19
BACH2	sKITLG	0.269	0.134763194495279	0.318	0.143919241525135	ovarianSurf	0.521457296096933	1.93850295946815	2.82664886816238e-25
NT5C3A	sKITLG	0.384	0.248298074811507	0.407142857142857	0.257554054975786	sLGR5_male	0.520905852930383	1.35652565867287	1.790016159353e-18
TNS3	sKITLG	0.393	0.256423395066247	0.456	0.265739035536457	preGC_I	0.520819524822105	1.32524052117584	2.06274032191861e-18
COPS3	sKITLG	0.417	0.277285703828417	0.421428571428571	0.286815360480186	sLGR5_male	0.520798227842517	1.24891661353122	1.53204809879811e-18
IGF2BP3	sKITLG	0.339	0.206500256203792	0.343	0.215537821431007	ovarianSurf	0.520235800102127	1.53461887935731	2.07764617388072e-19
CERCAM	sKITLG	0.264	0.130663933826221	0.335714285714286	0.13975854307346	sLGR5_male	0.519509505952632	1.96783903769936	1.95007143771773e-25
MED28	sKITLG	0.601	0.408169240904765	0.614285714285714	0.421321874360548	sLGR5_male	0.519479272335662	0.864358190242365	1.41960171236161e-30
DELE1	sKITLG	0.351	0.218651636044213	0.339285714285714	0.227678875929336	sLGR5_male	0.519416497682486	1.47981908171648	8.48681407377499e-19
PTS	sKITLG	0.58	0.395944659980968	0.685714285714286	0.40849873814883	sLGR5_male	0.519254543130805	0.895266453673802	5.1281226882851e-28
MRPL47	sKITLG	0.498	0.341995461532831	0.610714285714286	0.35263624582225	sLGR5_male	0.519074472781023	1.04231821843579	4.23565289341296e-21
POLR2C	sKITLG	0.521	0.358172900958934	0.51	0.369279039628948	ovarianSurf	0.519021614913053	0.996202715764018	1.39143569910823e-22
CEBPZ	sKITLG	0.507	0.348510357953298	0.507	0.359320646613464	Sertoli_WFDC2	0.518934842399072	1.02354012307509	1.29342195008289e-21
YARS2	sKITLG	0.303	0.171510138350048	0.296428571428571	0.180478821362799	sLGR5_male	0.518778977902799	1.71214184126336	3.33334034516011e-21
GTPBP4	sKITLG	0.374	0.240758363223776	0.360714285714286	0.249846531614487	sLGR5_male	0.518703750261634	1.38690842315945	3.89937586060327e-18
PMPCB	sKITLG	0.585	0.399458311983017	0.569	0.412113771229793	ovarianSurf	0.518576657035114	0.886455823991647	2.00177510788495e-28
SETDB2	sKITLG	0.362	0.229704999633995	0.558	0.238728599686242	sLGR5_female	0.518538913722795	1.43242793846076	2.54461176364074e-18
MRPS9	sKITLG	0.351	0.219310445794598	0.346428571428571	0.228292749471387	sLGR5_male	0.518471396139155	1.47712648472694	1.33478042692421e-18
PCDH9	sKITLG	0.345	0.213600761291267	0.469	0.222563263078917	ovarianSurf	0.518377641824006	1.50254388934494	8.82545278222908e-19
LTV1	sKITLG	0.295	0.163604421345436	0.244	0.172566673487484	sLGR5_female	0.518306623243926	1.7569716042167	9.52067774936524e-22
MRPS24	sKITLG	0.514	0.354293243540004	0.578	0.365186549348612	Sertoli_WFDC2	0.517776338394995	1.00734696185797	7.77456152604573e-22
DHX36	sKITLG	0.606	0.412341702657199	0.642857142857143	0.425550780983562	sLGR5_male	0.517748822259452	0.854370993827478	8.34995628660154e-31
SLMAP	sKITLG	0.418	0.280579752580338	0.615	0.289952936361776	sLGR5_female	0.51749932286822	1.23803665757947	6.72334159181414e-18
DHX15	sKITLG	0.519	0.358026498792182	0.479	0.369006206943592	sLGR5_female	0.517412801516726	0.996941814097737	4.19611614301275e-22
PEPD	sKITLG	0.451	0.307737354512847	0.49	0.317509037582702	ovarianSurf	0.517409297298421	1.1472489962271	1.25100719671256e-18
QDPR	sKITLG	0.38	0.247200058560867	0.351	0.256258099720347	Sertoli_WFDC2	0.517396653338432	1.3615701403643	8.41431872403142e-18
UBA2	sKITLG	0.583	0.399165507649513	0.572	0.41170452220176	ovarianSurf	0.517382980407456	0.887449366050525	6.29195811563271e-28
MED15	sKITLG	0.39	0.256276992899495	0.55	0.265397994679763	sLGR5_male	0.517344638051947	1.32652471295371	1.00775299078731e-17
GNG10	sKITLG	0.449	0.306273332845326	0.473	0.316008457813246	ovarianSurf	0.517241848934206	1.15198630052162	1.5570354747174e-18
FNBP4	sKITLG	0.558	0.383939682307298	0.521428571428571	0.39581201827979	sLGR5_male	0.517163262015192	0.926815881747656	2.8310511275633e-25
SNX1	sKITLG	0.514	0.354952053290389	0.547	0.365800422890662	preGC_IIb	0.516913036895044	1.00566738695534	1.18058327645665e-21
TCEAL7	sKITLG	0.459	0.314545055266818	0.610714285714286	0.324398062887934	sLGR5_male	0.516734823010565	1.12578392812759	9.08087341944271e-19
KDM1A	sKITLG	0.532	0.367615840714443	0.628571428571429	0.378828183616397	sLGR5_male	0.516397779614049	0.97067251807152	7.42277093102298e-23
CAMLG	sKITLG	0.585	0.401141936900666	0.543	0.413682559170589	coelEpi	0.516353973267667	0.882656364560114	6.40535524469982e-28
NIPSNAP1	sKITLG	0.697	0.460727618768758	0.692857142857143	0.476843325830434	sLGR5_male	0.516175407700117	0.740567299426279	6.11589668660066e-46
UBA6	sKITLG	0.418	0.281750969914355	0.471	0.291044267103199	preGC_IIb	0.515928999349611	1.23427990275026	1.37618516508157e-17
DENR	sKITLG	0.539	0.372666715467389	0.526	0.384012004638156	sLGR5_female	0.515866909529641	0.957081464804528	2.61915857051447e-23
UPF3B	sKITLG	0.45	0.308249762096479	0.466	0.317918286610736	sLGR5_female	0.515682400304486	1.14596088956552	2.94602660128208e-18
CCDC28A	sKITLG	0.319	0.189810409194056	0.31	0.198622194938954	preGC_IIb	0.515615897742318	1.61635077662169	2.08115080403386e-19
URM1	sKITLG	0.447	0.306126930678574	0.427	0.31573562512789	preGC_IIb	0.515323970073426	1.15285004490699	4.26853513148133e-18
EI24	sKITLG	0.473	0.326403630773735	0.506	0.336402701043585	coelEpi	0.515308110142356	1.08944632165403	4.79020347575208e-19
HAUS1	sKITLG	0.339	0.210087109289217	0.392857142857143	0.218880021826615	sLGR5_male	0.51501949369683	1.51923154482841	2.63724516188518e-18
LETMD1	sKITLG	0.424	0.287607056584437	0.459	0.296910169838347	coelEpi	0.51487407321965	1.21432564438597	1.79826443249588e-17
NR2F2	sKITLG	0.79	0.501500622209209	0.907142857142857	0.521178637200737	sLGR5_male	0.514813313609651	0.651662422290698	1.61507829079728e-71
MCTS1	sKITLG	0.55	0.380645633555377	0.632142857142857	0.392196985198827	sLGR5_male	0.514795078680778	0.935991052146868	5.05165588071491e-24
WDR43	sKITLG	0.297	0.168069687431374	0.251	0.176863788281836	ovarianSurf	0.514515493918681	1.7323754003996	1.04543032889867e-20
E2F4	sKITLG	0.347	0.218432032794085	0.428571428571429	0.227201418729964	sLGR5_male	0.514225666667371	1.48191834774458	7.48962332734969e-18
USP3	sKITLG	0.337	0.208696288705073	0.373	0.217447650228497	ovarianSurf	0.51419363821149	1.52579714602816	3.25337857545795e-18
MRPL13	sKITLG	0.467	0.322743576604934	0.421	0.332583043448605	sLGR5_female	0.514104279722427	1.1008656953371	1.48472903670224e-18
MAT2B	sKITLG	0.592	0.406998023570749	0.577	0.419616670077075	preGC_I	0.514100895453648	0.868413674752785	3.27110666233027e-28
MDFI	sKITLG	0.391	0.259571041651416	0.507	0.268535570561353	coelEpi	0.51407581094286	1.31477189499453	4.5208525856711e-17
SRPK1	sKITLG	0.429	0.29273113242076	0.434	0.302025782688766	Sertoli_WFDC2	0.513617200715077	1.19724289210974	2.56471895353196e-17
WDR74	sKITLG	0.343	0.214991581875412	0.308	0.223722801991679	preGC_IIb	0.513590187204106	1.49734748456008	7.37723714957831e-18
SVIL	sKITLG	0.391	0.260083449235049	0.607142857142857	0.269013027760726	sLGR5_male	0.513381228854354	1.31299547021574	6.17855540346773e-17
PHAX	sKITLG	0.407	0.274211258326623	0.414285714285714	0.283268535570561	sLGR5_male	0.513373496519157	1.26135994230751	5.66272125850375e-17
SRP19	sKITLG	0.425	0.28958348583559	0.446	0.298819998635837	sLGR5_female	0.513363406702856	1.20791389812437	3.40511462363573e-17
ST6GAL1	sKITLG	0.249	0.118366151819047	0.385714285714286	0.127276447718437	sLGR5_male	0.513287057328213	2.06139380453098	5.10444652320312e-26
C2orf88	sKITLG	0.151	0.0248151672644755	0.077	0.0334220039560739	preGC_IIa	0.513179660019872	3.39854079483359	4.44690153353776e-58
C12orf10	sKITLG	0.462	0.319595930019764	0.479	0.329309051224337	ovarianSurf	0.513170474919029	1.11075860372084	3.54637102763702e-18
RCN1	sKITLG	0.61	0.418124588243906	0.591	0.431212059204693	sLGR5_female	0.513104728829248	0.841155293162702	3.09838246042994e-30
HIST1H2BK	sKITLG	0.286	0.157528731425225	0.275	0.166291521724303	preGC_I	0.513087682506556	1.79401287589705	2.35405277455638e-21
SLC35B1	sKITLG	0.311	0.183441914940341	0.467857142857143	0.192142418661756	sLGR5_male	0.513000228017248	1.64951841806189	2.46884944976532e-19
MRPL9	sKITLG	0.474	0.329038869775273	0.5	0.338926403383125	sLGR5_male	0.512854867515237	1.08197229433594	1.32761590418829e-18
CPSF6	sKITLG	0.462	0.319888734353268	0.46	0.329581883909692	sLGR5_female	0.51278786620151	1.10993044632361	4.20344558920963e-18
PRKDC	sKITLG	0.607	0.416806968743137	0.628571428571429	0.429779687606575	sLGR5_male	0.512600911489699	0.844482555996209	1.00320368671775e-29
ACSM3	sKITLG	0.521	0.363223775711881	0.725	0.373985403451333	sLGR5_male	0.512423563988327	0.983538510534216	3.26853813734008e-21
GAR1	sKITLG	0.369	0.240758363223776	0.363	0.249505490757793	preGC_IIb	0.51227323772837	1.38827435698745	6.41017450161449e-17
UGDH	sKITLG	0.342	0.214991581875412	0.377	0.22365459382034	sLGR5_female	0.512197123910017	1.49765240909362	1.31868342518485e-17
GSTM1	sKITLG	0.333	0.206134250786912	0.376	0.214787531546279	sLGR5_female	0.512189286290801	1.53810596483724	5.74828018121913e-18
RAB34	sKITLG	0.6	0.413220115657712	0.747	0.425960030011595	coelEpi	0.512045858027152	0.853409763378587	1.0430101907557e-28
RELN	sKITLG	0.349	0.222018885879511	0.598	0.230680035468249	preGC_IIb	0.511886556111429	1.46672365647974	2.61650104646964e-17
CASP6	sKITLG	0.424	0.289876290169094	0.474	0.299024623149853	sLGR5_female	0.511865247499615	1.20722935731041	6.90065557961573e-17
TUBB2B	sKITLG	0.245	0.114925700900373	0.442857142857143	0.123797830980151	sLGR5_male	0.511830832613632	2.08910543923931	2.80945268225394e-26
IMMT	sKITLG	0.461	0.319961935436644	0.464285714285714	0.329581883909692	sLGR5_male	0.511677935755186	1.10993044632361	7.52050433680136e-18
PDHA1	sKITLG	0.45	0.311397408681649	0.532142857142857	0.32085123797831	sLGR5_male	0.511549963361911	1.1367776963598	1.88973706530137e-17
NOLC1	sKITLG	0.349	0.222384891296391	0.321	0.231021076324944	preGC_IIb	0.511370970259052	1.46524633312049	3.32980070089122e-17
RAB11FIP2	sKITLG	0.423	0.28958348583559	0.574	0.298683582293159	ovarianSurf	0.511140729594894	1.20837051913687	9.85785732943597e-17
PTK7	sKITLG	0.457	0.317253495351731	0.619	0.326785348884796	coelEpi	0.5111324493182	1.11845174905514	1.34089764593549e-17
LTA4H	sKITLG	0.563	0.39184539931191	0.588	0.403519541641089	ovarianSurf	0.510939593866564	0.907530362107574	2.17726395257124e-24
AC022075.1	sKITLG	0.563	0.392138203645414	0.9	0.403792374326444	sLGR5_male	0.5105590598879	0.906854458060213	2.61671863627367e-24
MTCH2	sKITLG	0.474	0.330868896859674	0.492857142857143	0.340631607666598	sLGR5_male	0.510476060956711	1.07695371509855	3.87691573505121e-18
EIF2S3	sKITLG	0.618	0.424639484664373	0.694	0.437828251824569	ovarianSurf	0.510423852939169	0.825928564626486	1.12744927974497e-30
ZNF431	sKITLG	0.598	0.413586121074592	0.8	0.426164654525612	sLGR5_male	0.510051837662408	0.852929494418743	5.26715266379841e-28
FAM96A	sKITLG	0.545	0.381158041139009	0.522	0.392333401541505	sLGR5_female	0.509925591162873	0.935643286537382	1.51235651644392e-22
FLRT2	sKITLG	0.253	0.124515042822634	0.391	0.133278766796262	coelEpi	0.509874025393891	2.01531235333554	1.61448562245959e-24
SNHG18	sKITLG	0.359	0.233218651636044	0.434	0.241797967396494	coelEpi	0.509655336162961	1.41965274697204	1.34349194352421e-16
SPATS2	sKITLG	0.374	0.247419661810995	0.432142857142857	0.25605347520633	sLGR5_male	0.509525994328137	1.36236896879181	2.58739694507271e-16
VBP1	sKITLG	0.492	0.345216309201376	0.553571428571429	0.355228156333129	sLGR5_male	0.509217541008531	1.03499500204986	9.17276085301693e-19
ALDH1A2	sKITLG	0.432	0.298587219090843	0.755	0.307687060909897	coelEpi	0.509186324964903	1.17867204852987	1.56726260716833e-16
CBWD1	sKITLG	0.258	0.130371129492716	0.258	0.139076461360071	Sertoli_WFDC2	0.508964705163863	1.97273141536381	1.38117310731688e-23
TMEM45A	sKITLG	0.353	0.228021374716346	0.408	0.236545938203397	preGC_IIb	0.508889335357355	1.44161284803783	1.35345993223695e-16
USP14	sKITLG	0.421	0.289656686918966	0.395	0.29861537412182	preGC_IIb	0.508820140207147	1.20859890785546	2.9122534094099e-16
BASP1	sKITLG	0.453	0.315935875850963	0.65	0.32528476911534	sLGR5_male	0.508743583240938	1.12305426764004	5.26591714214633e-17
WDR61	sKITLG	0.485	0.340458238781934	0.467	0.350317167996726	ovarianSurf	0.508724425175707	1.04891634056847	2.62298630430004e-18
ROBO1	sKITLG	0.481	0.337530195446893	0.605	0.347316008457813	Sertoli_WFDC2	0.508667228831525	1.05752022626097	4.18765888471338e-18
MRPL44	sKITLG	0.367	0.241636776224288	0.352	0.250187572471182	preGC_IIb	0.508494777390221	1.38554435256191	3.24711496254889e-16
CHCHD3	sKITLG	0.529	0.371715101383501	0.618	0.38244321669736	sLGR5_female	0.508461622511919	0.961175089814592	5.59119407848832e-21
KCTD12	sKITLG	0.667	0.451943488763634	0.826	0.466612100129596	granulosa	0.508425410447237	0.762256987177266	6.53796851274191e-38
IMP4	sKITLG	0.343	0.218944440377718	0.318	0.227406043243981	ovarianSurf	0.507989216061241	1.48101812262753	1.01848678710884e-16
PSMC6	sKITLG	0.604	0.418710196910914	0.642857142857143	0.431348475547371	sLGR5_male	0.507866748515777	0.840838987608902	3.06630515128964e-28
AC092691.1	sKITLG	0.496	0.349242368787058	0.708	0.359252438442125	preGC_IIb	0.507770063361618	1.02372996645488	1.07330286455145e-18
MPST	sKITLG	0.496	0.349242368787058	0.54	0.359252438442125	preGC_IIb	0.507770063361618	1.02372996645488	1.07330286455145e-18
ALDH2	sKITLG	0.421	0.290535099919479	0.419	0.299433872177887	coelEpi	0.507667767224869	1.20586167986905	4.78482716337738e-16
ZNF414	sKITLG	0.294	0.169387306932143	0.278571428571429	0.17788691085192	sLGR5_male	0.507622535290166	1.72660726289172	2.14383089063011e-19
MRPL10	sKITLG	0.425	0.294048751921528	0.42	0.302980697087511	preGC_IIb	0.507486627130654	1.19408618148389	4.4741932056813e-16
POLD2	sKITLG	0.648	0.443232559841886	0.616	0.457199372484824	ovarianSurf	0.507147946288039	0.782635719580307	2.35941284847694e-34
PVT1	sKITLG	0.218	0.0888661152185052	0.214	0.0976741013573426	preGC_I	0.507093906775053	2.32611883841767	2.90196323921908e-30
GARS	sKITLG	0.355	0.231388624551643	0.392857142857143	0.239819930427665	sLGR5_male	0.506892759132285	1.4278669271332	3.74982692127003e-16
LINC01197	sKITLG	0.291	0.166971671180733	0.378	0.175431416683719	preGC_I	0.506487566268999	1.74050710058075	2.15493338665054e-19
SNX5	sKITLG	0.51	0.360295732376839	0.49	0.370506786713048	ovarianSurf	0.506370593516864	0.992883516699733	3.0121177495558e-19
SMAD5	sKITLG	0.485	0.342361466949711	0.489	0.352090580451538	sLGR5_female	0.506275400744957	1.04386680565971	7.79216282791973e-18
CIR1	sKITLG	0.535	0.377424785886831	0.495	0.38817270308983	sLGR5_female	0.5062731361243	0.946304927335141	5.51366343257348e-21
GNAI3	sKITLG	0.577	0.404143181319083	0.546428571428571	0.415933428824773	sLGR5_male	0.506161743691067	0.877230058390064	9.3097880295841e-25
RARS	sKITLG	0.322	0.19932655003294	0.305	0.207693881727031	ovarianSurf	0.506084181865754	1.57169000579427	3.19888657673331e-17
PSMA1	sKITLG	0.443	0.310006588097504	0.548	0.319077825523498	Sertoli_WFDC2	0.506047865785804	1.14232023879414	3.33409996113842e-16
HIBCH	sKITLG	0.432	0.301002854842252	0.425	0.309937930564082	sLGR5_female	0.506037553432104	1.17138322553728	6.10581153243794e-16
MRPS15	sKITLG	0.547	0.385696508308323	0.521	0.396698724507196	ovarianSurf	0.505744257198525	0.924578166724909	7.64420366777454e-22
NRSN2	sKITLG	0.318	0.195593294780763	0.349	0.20394243230339	ovarianSurf	0.505593771218023	1.58991751955353	2.48653844278508e-17
CBWD5	sKITLG	0.27	0.145230949418051	0.325	0.15374121819794	Sertoli_WFDC2	0.505570812661407	1.87248449133854	2.91643673738483e-21
FBXO17	sKITLG	0.363	0.240172754556767	0.43	0.248550576359048	coelEpi	0.505335540703705	1.39210892755842	1.12397727015746e-15
THOC7	sKITLG	0.458	0.322523973354806	0.475	0.331764545392538	ovarianSurf	0.505325031129856	1.10332976229226	1.58020688949955e-16
ZNF714	sKITLG	0.335	0.212941951540883	0.421428571428571	0.221267307823477	sLGR5_male	0.505308563185492	1.50838377070296	1.77208500281873e-16
NGDN	sKITLG	0.459	0.323402386355318	0.525	0.332651251619944	sLGR5_male	0.505203229274749	1.10066063022821	1.53885438441098e-16
DAP3	sKITLG	0.425	0.295805577922553	0.475	0.304617693199645	sLGR5_male	0.505196545253719	1.18869775353816	1.19947699367503e-15
PSMD13	sKITLG	0.454	0.319522728936388	0.442857142857143	0.328695177682286	sLGR5_male	0.505131509061261	1.11262446929793	2.3358055534482e-16
MARCH5	sKITLG	0.467	0.329770880609033	0.535714285714286	0.339131027897142	sLGR5_male	0.504999198454679	1.08136873330766	8.58349201820947e-17
COPS2	sKITLG	0.586	0.410438474489422	0.553	0.422413205101971	ovarianSurf	0.504997973010119	0.861771285000204	1.79555035733762e-25
FADS1	sKITLG	0.425	0.296025181172681	0.525	0.304822317713662	sLGR5_male	0.504911150727046	1.18802623700481	1.35726925343392e-15
PMPCA	sKITLG	0.38	0.256423395066247	0.378571428571429	0.264852329309051	sLGR5_male	0.504861485358507	1.3285828562066	2.33610700216954e-15
IDH3B	sKITLG	0.488	0.345728716785008	0.47	0.355432780847145	ovarianSurf	0.504796535942176	1.03441913102905	1.07196298841114e-17
NTHL1	sKITLG	0.315	0.193104457945978	0.293	0.20141872996385	ovarianSurf	0.504746330821218	1.60236930419434	2.53184600329926e-17
RTCB	sKITLG	0.452	0.318351511602372	0.478571428571429	0.327467430598186	sLGR5_male	0.504597738188111	1.11636667740732	3.40314143338862e-16
PHLDA1	sKITLG	0.392	0.267769562989532	0.743	0.276243093922652	sLGR5_female	0.50429781812837	1.28647402583768	3.3721950092745e-15
SMNDC1	sKITLG	0.493	0.349827977454066	0.514285714285714	0.35959347929882	sLGR5_male	0.504231087109669	1.02278110975592	7.56830325651929e-18
DHCR24	sKITLG	0.515	0.365566210379914	0.523	0.375758815906146	preGC_IIb	0.504086011059757	0.978807788465548	4.11332378345132e-19
SSBP4	sKITLG	0.456	0.321938364687797	0.464	0.331082463679149	coelEpi	0.504056836641183	1.10538779965172	3.19427031408364e-16
TMEM11	sKITLG	0.402	0.277066100578289	0.467857142857143	0.285587613396085	sLGR5_male	0.503788980807487	1.25320641991912	4.00227425201119e-15
SRPRB	sKITLG	0.312	0.190688822194568	0.289	0.198963235795648	ovarianSurf	0.503766187414009	1.61463521607054	2.69101867875941e-17
GART	sKITLG	0.31	0.188931996193544	0.285	0.197189823340836	sLGR5_female	0.503312417615795	1.62358844392192	2.54036390189555e-17
EPB41L4A-AS1	sKITLG	0.748	0.493009296537589	0.706	0.510401746129186	ovarianSurf	0.503072730141714	0.672557125857906	9.81662737659392e-55
SNCG	sKITLG	0.202	0.0741526974599224	0.624671916010499	0.0828729281767956	FetalLeydig-like	0.50307025969305	2.49044683016362	4.26952618003231e-33
MPHOSPH10	sKITLG	0.341	0.22055486421199	0.296	0.228770206670759	sLGR5_female	0.502987700052293	1.47503724355511	8.44917130834649e-16
MRPL48	sKITLG	0.341	0.220628065295366	0.344	0.228838414842098	ovarianSurf	0.502886045557577	1.47473913653248	8.83822580052948e-16
SMARCD1	sKITLG	0.39	0.267037552155772	0.439285714285714	0.275424595866585	sLGR5_male	0.502882140955538	1.28944138706548	6.19074039650292e-15
XRN2	sKITLG	0.647	0.446087402093551	0.714285714285714	0.459791282995703	sLGR5_male	0.502707758429882	0.776982625084826	4.28019257903651e-33
ZMYM2	sKITLG	0.498	0.354659248956885	0.514285714285714	0.364436259463884	sLGR5_male	0.502682999762286	1.00940361398049	8.07637968971265e-18
USP10	sKITLG	0.455	0.322231169021302	0.422	0.331287088193166	sLGR5_female	0.502670324334597	1.10476994359252	6.20874830050782e-16
PCID2	sKITLG	0.322	0.20174218578435	0.307	0.209944751381215	ovarianSurf	0.5026133006357	1.56091087153944	1.62454880796978e-16
METTL9	sKITLG	0.555	0.393455823146183	0.625	0.404474456039834	sLGR5_male	0.502367515140304	0.905166693946493	7.80319787576191e-22
IFT57	sKITLG	0.532	0.3787424053876	0.613	0.389195825659914	sLGR5_female	0.502033852015684	0.943672654164819	6.82541585533296e-20
MAF	sKITLG	0.427	0.300051240758363	0.523	0.308710183479981	preGC_IIc	0.501875457611022	1.17535235974478	4.57979073629772e-15
CNOT2	sKITLG	0.481	0.342873874533343	0.472	0.352295204965555	sLGR5_female	0.501820471908957	1.04328580438453	8.63866370253999e-17
FRG1	sKITLG	0.441	0.311763414098529	0.418	0.320578405292954	Sertoli_WFDC2	0.501694123623891	1.13762839824011	2.42030173303429e-15
POP5	sKITLG	0.386	0.264329112070859	0.385	0.272628060841689	sLGR5_female	0.501663675309599	1.29964682722694	1.01343080365004e-14
TIMM10	sKITLG	0.38	0.258839030817656	0.362	0.267103198963236	Sertoli_WFDC2	0.501645669269388	1.32012018228786	9.45473202251932e-15
DDX10	sKITLG	0.351	0.231388624551643	0.386	0.23954709774231	Sertoli_WFDC2	0.501580836145323	1.42900523118326	3.19499306841095e-15
FAM207A	sKITLG	0.328	0.208623087621697	0.314	0.216765568515108	preGC_IIb	0.501491939140046	1.5289388388416	5.18597285541984e-16
ORAI3	sKITLG	0.342	0.222824097796647	0.425	0.230952868153605	preGC_I	0.501215235149853	1.46554162324518	2.02911711333585e-15
NAV2	sKITLG	0.374	0.253714954981334	0.385	0.261919377941477	preGC_IIb	0.501054734093328	1.33971854035649	1.07132046514131e-14
TSPAN13	sKITLG	0.601	0.422370251079716	0.817	0.4345542596003	preGC_IIb	0.500894112756888	0.833434463821776	2.76551853381414e-26
SF3A3	sKITLG	0.451	0.320547544103653	0.492857142857143	0.329445467567015	sLGR5_male	0.500765342120532	1.11034443929165	1.87884060299964e-15
WDR18	sKITLG	0.481	0.343752287533856	0.484	0.353113703021622	preGC_IIb	0.500704246306491	1.04096516903636	1.38686464952572e-16
ZNHIT3	sKITLG	0.469	0.334675353195227	0.462	0.343837391719528	preGC_IIb	0.500698036540292	1.06758643185563	4.51330620848931e-16
COPB2	sKITLG	0.521	0.372373911133885	0.639285714285714	0.382511424868699	sLGR5_male	0.50067931051362	0.960996757223839	7.76259478651077e-19
SECISBP2	sKITLG	0.417	0.292511529170632	0.446	0.301002660118682	ovarianSurf	0.500665285670855	1.20063617666872	1.09885417647428e-14
ECHDC1	sKITLG	0.402	0.279481736329698	0.475	0.287838483050269	sLGR5_male	0.500633023121099	1.24535577890821	1.52718787754804e-14
SYMPK	sKITLG	0.352	0.233072249469292	0.399	0.241184093854444	sLGR5_female	0.500612556287617	1.42219476218073	5.19767108622376e-15
MRPL37	sKITLG	0.511	0.365566210379914	0.543	0.37548598322079	preGC_IIb	0.500541943895338	0.979534136781484	3.64092190244281e-18
DDT	sKITLG	0.627	0.437230071005051	0.631	0.450173930836914	preGC_IIb	0.50042202871819	0.798121257923748	1.43694010618661e-29
CD200	sKITLG	0.509	0.364541395212649	0.558	0.374394652479367	Sertoli_WFDC2	0.500064412050683	0.982444817388375	5.94409353626252e-18
SMARCC1	sKITLG	0.769	0.503843056877242	0.803571428571429	0.521928927085465	sLGR5_male	0.500022144785775	0.650223855378121	6.65730916997348e-60
XRCC1	sKITLG	0.37	0.250933313813044	0.385714285714286	0.259054634745242	sLGR5_male	0.499765028989432	1.35071629456603	1.66329803040506e-14
SLC25A37	sKITLG	0.395	0.273918453993119	0.474	0.282177204829139	sLGR5_female	0.499761907693357	1.26522001947685	2.32443172021444e-14
CUL1	sKITLG	0.473	0.338481809530781	0.555	0.347657049314508	preGC_IIb	0.499742840857959	1.05653877559822	4.65864413829318e-16
UNG	sKITLG	0.447	0.318424712685748	0.488	0.32719459791283	preGC_IIb	0.499388482442982	1.1172001844362	4.43340343824336e-15
KIF2A	sKITLG	0.4	0.278676524412561	0.421428571428571	0.286951776822863	sLGR5_male	0.499376440939097	1.24844110234774	2.64454113410535e-14
SARS2	sKITLG	0.308	0.189590805943928	0.321428571428571	0.197667280540209	sLGR5_male	0.499320379421752	1.62117006305764	1.27720771790408e-16
GLRX3	sKITLG	0.459	0.328087255691384	0.482142857142857	0.337016574585635	sLGR5_male	0.499219033695464	1.08762316709251	1.98495806905614e-15
HNRNPLL	sKITLG	0.407	0.2849718175829	0.460714285714286	0.293295136757384	sLGR5_male	0.49921638489244	1.22657588425661	2.56355401455169e-14
ATIC	sKITLG	0.382	0.262572286069834	0.429	0.270718232044199	ovarianSurf	0.499150512065286	1.3066767331552	2.80339752655426e-14
PDK2	sKITLG	0.407	0.285045018666276	0.436	0.293363344928722	coelEpi	0.499121744733893	1.22634335315453	2.66452679596472e-14
NUDT21	sKITLG	0.456	0.325891223190103	0.47	0.334765704931451	preGC_IIb	0.499011917329003	1.09432438010746	2.73591587577657e-15
TMEM242	sKITLG	0.286	0.166532464680477	0.235714285714286	0.174681126798991	sLGR5_male	0.499010826525279	1.74479309973874	3.59550912478191e-18
PRMT5	sKITLG	0.337	0.21945684796135	0.371428571428571	0.22747425141532	sLGR5_male	0.499002042697338	1.48071822758854	3.69455476922943e-15
NIT2	sKITLG	0.381	0.261767074152697	0.407	0.269899733988132	sLGR5_female	0.498997507674632	1.30970474455284	2.94668393626528e-14
ALG8	sKITLG	0.285	0.165507649513213	0.244	0.173658004228907	sLGR5_female	0.49894021094396	1.75066740682091	3.04811170937934e-18
TSPAN14	sKITLG	0.442	0.314764658516946	0.653571428571429	0.323443148489189	sLGR5_male	0.498899508336308	1.12873191931291	7.45872862041853e-15
SMARCA4	sKITLG	0.532	0.381231242222385	0.721428571428571	0.391514903485438	sLGR5_male	0.498873262604315	0.937731696624652	2.93103981706811e-19
MPV17	sKITLG	0.397	0.276407290827904	0.414	0.28463269899734	ovarianSurf	0.498852615022645	1.25655570534671	3.35344635167374e-14
MRPL19	sKITLG	0.414	0.291340311836615	0.410714285714286	0.299706704863243	sLGR5_male	0.498849686259395	1.20495093299371	2.55231775088453e-14
SIGLEC11	sKITLG	0.424	0.299904838591611	0.467	0.308369142623286	preGC_IIb	0.498818064224912	1.17645769864366	1.86575771163209e-14
TRA2A	sKITLG	0.576	0.409340458238782	0.557	0.420708000818498	sLGR5_female	0.498710171920377	0.865816270695099	4.70997664936617e-23
OXA1L	sKITLG	0.622	0.435912451504282	0.632	0.448605142896119	ovarianSurf	0.49860278382016	0.801612192636914	1.89069291951781e-28
MRPS36	sKITLG	0.544	0.389356562477125	0.522	0.399904508560125	Sertoli_WFDC2	0.498592042001883	0.91652948897405	3.92135677316617e-20
PLSCR3	sKITLG	0.264	0.143108118000146	0.264	0.151353932201078	sLGR5_female	0.498467445433497	1.88813426300567	2.75171615512121e-20
HSD17B11	sKITLG	0.338	0.220847668545494	0.35	0.228838414842098	Sertoli_WFDC2	0.498461828147979	1.47473913653248	5.09036457355583e-15
LYPLA2	sKITLG	0.442	0.315130663933826	0.475	0.323784189345884	sLGR5_female	0.49843370578503	1.12767806738695	9.06569372972837e-15
LSM6	sKITLG	0.558	0.398579898982505	0.537	0.409453652547575	sLGR5_female	0.498255811979023	0.892931562686421	2.98501560381555e-21
GFRA3	sLGR5_male	0.532142857142857	0.0241985953688895	0.187	0.0338994611554464	sLGR5_female	1.80096095648716	3.38435615984164	2.21412757581383e-144
SRY	sLGR5_male	0.425	0.0175231207843683	0.129	0.0253052315667417	Sertoli_WFDC2	1.5626162524156	3.67674412333083	2.83083865414499e-115
GRID2	sLGR5_male	0.542857142857143	0.0545859119671789	0.341	0.063911056544574	sLGR5_female	1.49299986200849	2.75026290369984	2.76709576484267e-104
REG3G	sLGR5_male	0.632142857142857	0.112509561226618	0.451	0.122433667553373	sLGR5_female	1.32761750588504	2.10018588501589	1.34120126697877e-88
GPC6	sLGR5_male	0.5	0.0716918155900146	0.235	0.0798717686378828	sLGR5_female	1.26366641117027	2.52733282234055	6.52457491589276e-76
MMD	sLGR5_male	0.582142857142857	0.106946665739517	0.339	0.116022099447514	sLGR5_female	1.2539209240979	2.1539745935424	4.13620873088667e-77
GLUD2	sLGR5_male	0.435714285714286	0.0494402336416105	0.205	0.0568174067253257	sLGR5_female	1.24959046550041	2.86791254377142	1.43715008598397e-74
STRA6	sLGR5_male	0.785714285714286	0.195466240178013	0.604	0.206738967328286	sLGR5_female	1.23852009983465	1.57629830888046	3.680000966575e-94
AMOT	sLGR5_male	0.578571428571429	0.116403588067589	0.407	0.125230202578269	sKITLG	1.20204093425274	2.07760161475783	3.69207191593686e-71
PLAC1	sLGR5_male	0.839285714285714	0.229052221681385	0.655	0.240706636655071	sLGR5_female	1.19529087547073	1.42417636226299	1.34900154396567e-97
ACTC1	sLGR5_male	0.317857142857143	0.0188443084625548	0.194	0.0245549416820135	sLGR5_female	1.17824625624801	3.70684215448811	1.71146803565463e-72
BX470209.1	sLGR5_male	0.564285714285714	0.1287114943328	0.641	0.137030216219903	sLGR5_female	1.12154822763388	1.98755382112333	1.79247508880106e-61
AC112487.1	sLGR5_male	0.535714285714286	0.116681732841944	0.374	0.124684537207557	sLGR5_female	1.11534023245938	2.08196843392417	9.08909077413601e-60
GPR37	sLGR5_male	0.435714285714286	0.072456713719491	0.256	0.0793943114385103	sLGR5_female	1.10380744297471	2.53332855764688	1.45999499630068e-57
HMGA2	sLGR5_male	0.546428571428571	0.126834017105904	0.494	0.134847554737058	sKITLG	1.09482994822661	2.00361036276765	6.51854975519876e-58
TAC1	sLGR5_male	0.542857142857143	0.127112161880259	0.895	0.135052179251074	sLGR5_female	1.08685106236411	2.00209406224968	5.99373710910428e-57
NEDD9	sLGR5_male	0.521428571428571	0.117863848132953	0.401	0.125571243434964	Sertoli_WFDC2	1.08190275959628	2.07488200470519	8.07051644016516e-56
CRABP2	sLGR5_male	0.792857142857143	0.247409776788819	0.691	0.257826887661142	sKITLG	1.07469161145024	1.35546689732463	2.32592431433839e-76
RPS4Y1	sLGR5_male	0.960714285714286	0.318475766636534	0.979	0.330741422822454	Sertoli_WFDC2	1.06295197134305	1.10641840883291	8.11718319280401e-111
MIR503HG	sLGR5_male	0.685714285714286	0.215562200125165	0.586	0.224541300047746	Sertoli_WFDC2	1.02424842798261	1.4936956241413	8.75625468963442e-59
SYNDIG1	sLGR5_male	0.396428571428571	0.0696057297823517	0.465	0.0758474865288862	sLGR5_female	1.02240146048278	2.57903071112774	2.94920410828286e-49
TMSB15A	sLGR5_male	0.653571428571429	0.201029135665114	0.518	0.20967191869586	sLGR5_female	1.02101664613096	1.56221126183972	6.71168830833303e-56
CXCR4	sLGR5_male	0.4	0.0716222793964258	0.308	0.077893731669054	sPAX8m	1.02096391828892	2.55240979572231	5.13205119485868e-49
KAZN	sLGR5_male	0.571428571428571	0.16862526945275	0.368	0.176318122911125	sLGR5_female	0.991694513711849	1.73546539899574	5.17879485546827e-48
TUBB3	sLGR5_male	0.682142857142857	0.227522425422432	0.615	0.236204897346702	sLGR5_female	0.984370098333378	1.44305564153584	2.71116829274349e-54
IGF2BP1	sLGR5_male	0.5	0.133092274528892	0.332	0.140099583930155	sLGR5_female	0.98270089772488	1.96540179544976	8.16353803646581e-45
HMGA1	sLGR5_male	0.471428571428571	0.122870454071344	0.377	0.129527317372621	coelEpi	0.963535638273676	2.04386347512598	1.97244023536897e-42
TTTY15	sLGR5_male	0.360714285714286	0.0638342257144844	0.331	0.069504126594366	Sertoli_WFDC2	0.961797444372391	2.66636915271554	8.44425297678291e-44
MME	sLGR5_male	0.685714285714286	0.239134969751756	0.583	0.247663870131642	sLGR5_female	0.95703964424498	1.39568281452393	1.00713031219823e-51
ZPBP	sLGR5_male	0.514285714285714	0.149155135247897	0.447	0.156128504194803	sLGR5_female	0.955067588221216	1.8570758659857	2.67208823869483e-42
LGR5	sLGR5_male	0.260714285714286	0.0212780752381615	0.139	0.0258508969374531	sLGR5_female	0.953017602151701	3.65540998085584	3.72044302496667e-50
SORD	sLGR5_male	0.664285714285714	0.230164800778805	0.63	0.238455767000887	sLGR5_female	0.952301034086743	1.43357144916284	1.69207723028381e-49
SLC29A1	sLGR5_male	0.475	0.130171754398164	0.307	0.136757383534547	sLGR5_female	0.945034751943858	1.98954684619759	1.48010181155661e-40
PTBP3	sLGR5_male	0.65	0.22654891871219	0.571	0.234636109405907	Sertoli_WFDC2	0.942317633121033	1.44971943557082	1.90443050227461e-47
KCTD15	sLGR5_male	0.296428571428571	0.037549544537932	0.097	0.0424936907441512	sKITLG	0.93623990133399	3.15839966715081	1.00628710088831e-44
MLLT11	sLGR5_male	0.717857142857143	0.262916347959113	0.532	0.271604938271605	sLGR5_female	0.93565981058621	1.30340670131412	2.1430691561343e-52
TUBB2B	sLGR5_male	0.442857142857143	0.117585703358598	0.296	0.123797830980151	sLGR5_female	0.925175265948839	2.08910543923931	2.33623236895152e-38
RASL11B	sLGR5_male	0.657142857142857	0.23663166678256	0.705	0.244662710592729	sLGR5_female	0.925174808381074	1.40787470840598	3.34825928262943e-46
AC123912.4	sLGR5_male	0.492857142857143	0.146512759891524	0.459	0.15312734465589	granulosa	0.924839225839798	1.87648538576191	9.40146612128806e-39
NRK	sLGR5_male	0.689285714285714	0.255615047632293	0.783	0.263897414910306	sKITLG	0.91826286581745	1.33219483123775	5.04675683785439e-48
LMO4	sLGR5_male	0.675	0.249634934983659	0.467	0.257758679489803	sLGR5_female	0.915118750747423	1.35573148258878	1.56851500905871e-46
CRLF1	sLGR5_male	0.317857142857143	0.0525693623531048	0.238	0.0576359047813928	sLGR5_female	0.907040181120418	2.85360955858109	6.34977287496306e-40
TMEM206	sLGR5_male	0.482142857142857	0.14950281621584	0.307	0.155855671509447	sLGR5_female	0.896219139829802	1.85882488260996	1.00187285649238e-35
DMRT1	sLGR5_male	0.425	0.115499617550935	0.413	0.121410544983289	Sertoli_WFDC2	0.896145455627157	2.10857754265213	1.78546291985079e-35
IGDCC3	sLGR5_male	0.246428571428571	0.0221820457548154	0.068	0.0264647704795034	sLGR5_female	0.89501399427048	3.63194084631499	8.10296695517755e-45
HRASLS	sLGR5_male	0.510714285714286	0.16751269035533	0.723	0.17406725325694	sLGR5_female	0.892888701538295	1.74831354147358	6.12569516334367e-36
KCNN1	sLGR5_male	0.375	0.0873374591474863	0.198	0.0928313211922788	sLGR5_female	0.891364193732549	2.3769711832868	8.54471924035602e-36
COL2A1	sLGR5_male	0.496428571428571	0.160280926222099	0.455	0.166700770752336	Sertoli	0.889379022588937	1.79155486564678	2.65814793837378e-35
DDX3Y	sLGR5_male	0.382142857142857	0.0938043251512412	0.403	0.0993110974694768	Sertoli_WFDC2	0.882558147922981	2.30949795718163	1.01236835440267e-34
AP002884.1	sLGR5_male	0.5	0.165426604547667	0.452	0.171816383602756	sLGR5_female	0.880664454792827	1.76132890958565	1.61083494458094e-34
DLK1	sLGR5_male	0.464285714285714	0.14505249982616	0.695538057742782	0.151149307687061	FetalLeydig-like	0.877261885533006	1.88948713807109	1.16006135572626e-33
STAM	sLGR5_male	0.464285714285714	0.146582296085112	0.312	0.152649887456517	sLGR5_female	0.872675280780826	1.87960829706639	3.25894728314608e-33
SLC35F2	sLGR5_male	0.553571428571429	0.203949655795842	0.446	0.210626833094605	granulosa	0.862280098546456	1.5576672747936	2.63430139348676e-34
HBE1	sLGR5_male	0.210714285714286	0.0130728043946874	0.0603674540682415	0.0168474183207148	FetalLeydig-like	0.860463975390382	4.08355784931029	1.36142354557406e-45
APCDD1L	sLGR5_male	0.439285714285714	0.135734649885265	0.414	0.141531955528272	preGC_IIb	0.858904498759415	1.95522975327347	9.23994728727009e-32
LIMD2	sLGR5_male	0.442857142857143	0.138794242403171	0.328	0.144601323238524	sLGR5_female	0.85638599094912	1.93377481827221	1.61034294227534e-31
UTY	sLGR5_male	0.3	0.0534733328697587	0.199	0.0581815701521042	Sertoli_WFDC2	0.853255991533976	2.84418663844659	3.3784072913824e-35
FBLN1	sLGR5_male	0.525	0.190946387594743	0.423	0.197326239683514	sKITLG	0.852020862505118	1.62289688096213	2.27235000478754e-32
THSD7B	sLGR5_male	0.246428571428571	0.0275363326611501	0.116	0.0317167996726008	sLGR5_female	0.850402520872188	3.45090878035091	1.62484714071836e-39
PCSK6	sLGR5_male	0.342857142857143	0.0801752312078437	0.316	0.0851920060023191	Sertoli_WFDC2	0.844404917421493	2.46284767581269	4.81138169441763e-32
TMEM59L	sLGR5_male	0.492857142857143	0.174674918294973	0.515	0.180751654048155	sLGR5_female	0.843096838715013	1.710631266958	8.87708290256429e-31
TSPAN8	sLGR5_male	0.239285714285714	0.025519783047076	0.254	0.0296023463610941	sLGR5_female	0.842262180975488	3.51990165183786	2.19989441200379e-39
LINC02076	sLGR5_male	0.3	0.0561852444197205	0.222	0.0608416888343224	sLGR5_female	0.839844016007476	2.79948005335826	9.41073795733476e-34
KCTD8	sLGR5_male	0.357142857142857	0.0910228774076907	0.281	0.0961053134165473	sLGR5_female	0.836539526442709	2.34231067403958	9.14821964884094e-31
TBC1D8	sLGR5_male	0.325	0.0744037271399764	0.187	0.0791896869244936	sPAX8e	0.824170491378121	2.53590920424037	9.15356060292005e-31
ATP1A2	sLGR5_male	0.296428571428571	0.057506432097907	0.214	0.062069435918423	sKITLG	0.823923684548113	2.77950158642737	2.72071948141604e-32
SLITRK2	sLGR5_male	0.314285714285714	0.0682150059105765	0.204	0.0729145351613123	sLGR5_female	0.822946857829869	2.61846727491322	3.69790167542196e-31
APOBEC3C	sLGR5_male	0.603571428571429	0.249217717822126	0.465	0.255985267034991	sLGR5_female	0.822447787034815	1.36263538680324	9.84576732448892e-33
GLIPR2	sLGR5_male	0.482142857142857	0.175787497392393	0.466	0.181638360275561	sLGR5_female	0.822409200059946	1.70573760012433	1.238787202764e-28
AL359915.1	sLGR5_male	0.232142857142857	0.0253807106598985	0.17	0.0293295136757384	sLGR5_female	0.819269512576045	3.52916097725066	1.55757939813257e-37
AC022075.1	sLGR5_male	0.9	0.394131145261108	0.853	0.403792374326444	Sertoli_WFDC2	0.816169012254192	0.906854458060213	1.05122137079327e-65
GPRC5B	sLGR5_male	0.5	0.190111953271678	0.73	0.196030284428074	Sertoli_WFDC2	0.814743059649647	1.62948611929929	2.9580793849434e-28
CPVL	sLGR5_male	0.471428571428571	0.171963006745011	0.612	0.177682286337903	sLGR5_female	0.814514594968233	1.7277582317508	9.02807769357131e-28
GINS2	sLGR5_male	0.342857142857143	0.0906751964397469	0.284	0.095491439874497	sLGR5_female	0.805274972686256	2.34871867033491	4.01216950851753e-28
CYP51A1	sLGR5_male	0.610714285714286	0.261664696474515	0.46	0.268330946047336	Sertoli_WFDC2	0.80341552133987	1.31553418698926	2.46943168196969e-31
AHI1	sLGR5_male	0.542857142857143	0.221611848967388	0.411	0.227747084100675	sLGR5_female	0.803167753539931	1.47951954599461	2.31990715181979e-28
CCDC73	sLGR5_male	0.707142857142857	0.314025450246853	0.738	0.321533319691699	sLGR5_female	0.802362543869833	1.13465410244219	6.81606618820703e-38
TEAD2	sLGR5_male	0.685714285714286	0.303108267853418	0.502	0.310415387763454	sKITLG	0.802178686574827	1.16984391792162	4.23157353350163e-36
PCBP4	sLGR5_male	0.289285714285714	0.0582017940337946	0.186	0.0626151012891344	sLGR5_female	0.801538044359785	2.77074879531777	2.00289020236729e-30
NR2F2-AS1	sLGR5_male	0.510714285714286	0.203601974827898	0.411	0.209467294181843	sPAX8e	0.798342272021908	1.56318766549744	5.25479931332201e-27
SVIL	sLGR5_male	0.607142857142857	0.262429594603991	0.573	0.269013027760726	Sertoli_WFDC2	0.797175821202413	1.31299547021574	1.4154220808278e-30
ADAMTS19	sLGR5_male	0.375	0.114526110840693	0.327	0.119500716185799	sLGR5_female	0.796662342915723	2.12443291444193	2.09410416493199e-26
GNRHR	sLGR5_male	0.175	0.00737083652040887	0.035	0.0105722665575336	sLGR5_female	0.796166187078328	4.54952106901902	6.12443973417525e-44
ST6GAL1	sLGR5_male	0.385714285714286	0.122244628329045	0.249	0.127276447718437	sKITLG	0.795109038890519	2.06139380453098	4.52719639969134e-26
FIRRE	sLGR5_male	0.325	0.0819831722411515	0.269	0.0866243776004365	sLGR5_female	0.795006552107829	2.44617400648563	8.1372744960024e-28
AL135925.1	sLGR5_male	0.496428571428571	0.198873513663862	0.334	0.20455630584544	sLGR5_female	0.787788460711809	1.58691200718926	9.87474570769193e-26
GPC3	sLGR5_male	0.385714285714286	0.124747931298241	0.722	0.129731941886638	coelEpi	0.787738477949844	2.04228494283293	2.27122901780294e-25
ATP2B1-AS1	sLGR5_male	0.442857142857143	0.164800778805368	0.324	0.170111179319282	sLGR5_female	0.784434212152097	1.77130305969828	8.9008411066088e-25
ZNF738	sLGR5_male	0.575	0.250052152145192	0.432	0.256258099720347	Sertoli_WFDC2	0.78290283070947	1.3615701403643	9.44703362472785e-28
GGT7	sLGR5_male	0.371428571428571	0.116751269035533	0.253	0.121615169497306	sLGR5_female	0.782560468142189	2.10689356807512	3.80329010631649e-25
TSC22D3	sLGR5_male	0.832142857142857	0.381892775189486	0.729	0.390491780915354	sPAX8e	0.782504168932811	0.940348357515824	4.25981779645832e-50
CRMP1	sLGR5_male	0.592857142857143	0.261456087893749	0.527	0.267785280676625	sLGR5_female	0.781130673724673	1.31756981110186	2.29819483107605e-28
FHOD3	sLGR5_male	0.542857142857143	0.231625060844169	0.732	0.237569060773481	Sertoli_WFDC2	0.780246897024943	1.43729691557226	2.71391371050964e-26
TMEFF1	sLGR5_male	0.375	0.120923440650859	0.29	0.12577586794898	preGC_I	0.777470168183147	2.07325378182173	1.29228532006655e-24
HMGCS1	sLGR5_male	0.775	0.359293512273138	0.561	0.36723279448878	sLGR5_female	0.776363468825618	1.0017593146137	4.3331390180118e-42
SLC2A1	sLGR5_male	0.632142857142857	0.286419581392115	0.626	0.293022304072028	preGC_IIb	0.77595949752026	1.22750654974956	5.38095033620814e-30
SETDB2	sLGR5_male	0.539285714285714	0.232876712328767	0.558	0.238728599686242	sLGR5_female	0.772487923955624	1.43242793846076	1.77434506669802e-25
SLC35B1	sLGR5_male	0.467857142857143	0.186774215979417	0.325	0.192142418661756	sLGR5_female	0.771738974164671	1.64951841806189	7.80728117136488e-24
DEPP1	sLGR5_male	0.339285714285714	0.0992976844447535	0.268	0.103881044949185	sLGR5_female	0.768315496925338	2.2645088330431	1.10986004114572e-24
KDM5D	sLGR5_male	0.246428571428571	0.0405396008622488	0.209	0.04447172771298	Sertoli_WFDC2	0.767107900202861	3.11290162401161	3.66257188183698e-30
PRRT1	sLGR5_male	0.460714285714286	0.184409985397399	0.394	0.189686924493554	preGC_I	0.765882367106624	1.6623803317043	3.13580750641008e-23
MAP1B	sLGR5_male	0.753571428571429	0.354982268270635	0.663	0.362594638837733	Sertoli_WFDC2	0.764475430886365	1.01446976610513	1.53463113381001e-38
ADM	sLGR5_male	0.271428571428571	0.0574368959043182	0.124	0.0615237705477116	preGC_IIb	0.756832880737674	2.78833166587564	5.1881050410602e-27
MAD2L2	sLGR5_male	0.564285714285714	0.255962728600236	0.455	0.261851169770138	sLGR5_female	0.756131002028999	1.33997899093747	6.40484438586802e-25
ST3GAL6	sLGR5_male	0.242857142857143	0.0409568180237814	0.129	0.0448127685696746	sLGR5_female	0.754135097810173	3.10526216745365	4.35646992676056e-29
NR0B1	sLGR5_male	0.346428571428571	0.108893679160003	0.278215223097113	0.113430188936635	FetalLeydig-like	0.754025241265349	2.17656770674534	4.29711589320318e-23
PLEKHH2	sLGR5_male	0.575	0.263959390862944	0.562	0.269899733988132	preGC_I	0.753080228117883	1.30970474455284	4.49186739722711e-25
GBP2	sLGR5_male	0.285714285714286	0.0689103678464641	0.333	0.0730509515039902	Sertoli_WFDC2	0.747599461568719	2.61659811549052	3.85942134164094e-25
NNAT	sLGR5_male	0.407142857142857	0.154718030734998	0.433	0.159538912761749	sLGR5_female	0.747297449308449	1.83546741935409	1.87450826210726e-21
HTR1E	sLGR5_male	0.253571428571429	0.0490230164800779	0.232	0.0529295409590069	sLGR5_female	0.745194108102172	2.93879366575505	3.42204540611592e-27
EFNB1	sLGR5_male	0.514285714285714	0.231138307489048	0.397	0.236545938203397	sPAX8e	0.741400893276599	1.44161284803783	4.95050929860576e-22
APOBEC3H	sLGR5_male	0.203571428571429	0.0230164800778805	0.203	0.0264647704795034	sLGR5_female	0.739359386571266	3.63194084631499	6.3187636962751e-32
IL17B	sLGR5_male	0.278571428571429	0.0665461372644462	0.481	0.0705954573357888	sKITLG	0.738434212352236	2.6507894802388	1.10986004114572e-24
TSPAN14	sLGR5_male	0.653571428571429	0.31701550657117	0.496	0.323443148489189	sLGR5_female	0.737706932979512	1.12873191931291	8.32943880003702e-28
DPYSL4	sLGR5_male	0.292857142857143	0.0771851748835269	0.237	0.0813041402360003	sKITLG	0.734942084791655	2.50955833831297	1.74244071276032e-23
MEG3	sLGR5_male	0.910714285714286	0.437243585286141	0.838	0.446286065070595	sKITLG	0.734759851508836	0.806795131068526	8.75625468963442e-59
RIMS4	sLGR5_male	0.403571428571429	0.15909881093109	0.565	0.163767819384762	Sertoli_WFDC2	0.730184041564365	1.80930558971701	5.66658563773993e-20
HSF2	sLGR5_male	0.475	0.209999304638064	0.317	0.215060364231635	sLGR5_female	0.729997350036772	1.5368365263932	2.81775103076846e-20
BASP1	sLGR5_male	0.65	0.318962519991656	0.572	0.32528476911534	ovarianSurf	0.729985273966026	1.12305426764004	6.97643018815287e-27
IGF2BP2	sLGR5_male	0.617857142857143	0.300952645852166	0.587	0.307004979196508	sKITLG	0.729622132455866	1.18089131264533	5.09433526611089e-25
MED15	sLGR5_male	0.55	0.259856755441207	0.408	0.265397994679763	sLGR5_female	0.729588592124541	1.32652471295371	4.53126157044099e-22
SNAI2	sLGR5_male	0.296428571428571	0.0816354912732077	0.335	0.0857376713730305	sKITLG	0.728165811142448	2.45646297734802	1.24795968716429e-22
JPH4	sLGR5_male	0.332142857142857	0.108615534385648	0.248	0.112884523565923	sKITLG	0.724533073306502	2.1813898981271	8.49331248604817e-21
ZFHX3	sLGR5_male	0.475	0.212989360962381	0.314	0.217993315599209	Sertoli_WFDC2	0.723563167549747	1.5232908790521	9.69693160750935e-20
NR5A1	sLGR5_male	0.542857142857143	0.260204436409151	0.394	0.265602619193779	preGC_IIb	0.719695028574751	1.32575400000612	5.49080822175877e-21
CSKMT	sLGR5_male	0.446428571428571	0.194701342048536	0.341	0.19950890116636	preGC_I	0.719596618871566	1.61189642627231	4.24235645194166e-19
TRO	sLGR5_male	0.460714285714286	0.204853626312496	0.347	0.209740126867199	sLGR5_female	0.71958319548213	1.56188600569765	3.22440091870132e-19
HACD1	sLGR5_male	0.375	0.143592239760795	0.289	0.14801173180547	Sertoli_WFDC2	0.71642390227641	1.91046373940376	4.39620011597111e-19
GNG3	sLGR5_male	0.203571428571429	0.0264932897573187	0.08	0.0298751790464498	sLGR5_female	0.714683766810799	3.51072727556182	4.14961043081532e-29
ACSM3	sLGR5_male	0.725	0.367151102148668	0.697	0.373985403451333	Sertoli_WFDC2	0.713065420137307	0.983538510534216	7.1763147750568e-31
ZFAND3	sLGR5_male	0.639285714285714	0.322161184896739	0.427	0.328217720482914	sLGR5_female	0.712214219582219	1.1140781088437	1.12441827469808e-24
SMTNL2	sLGR5_male	0.317857142857143	0.10228774076907	0.355	0.106404747288725	coelEpi	0.71216054509581	2.24050508569468	3.5841307751363e-20
FUT8	sLGR5_male	0.321428571428571	0.105069188512621	0.313	0.109201282313621	sLGR5_female	0.711823652016927	2.21456247294155	5.19943638112385e-20
PPM1K	sLGR5_male	0.546428571428571	0.266532230025728	0.421	0.271877770956961	Sertoli	0.711670038679733	1.30240268516552	1.9881028940296e-20
AC100810.1	sLGR5_male	0.489285714285714	0.229052221681385	0.338	0.234022235863856	sLGR5_female	0.710608795006909	1.45233914307981	6.82054618652131e-19
SYT1	sLGR5_male	0.475	0.219664835546902	0.449	0.224541300047746	sKITLG	0.709505421467119	1.4936956241413	1.46841650594081e-18
ACTR1A	sLGR5_male	0.653571428571429	0.331757179611988	0.534	0.337903280813041	sLGR5_female	0.709122108527427	1.08499557588896	3.05680893391768e-25
CHD7	sLGR5_male	0.482142857142857	0.225227731034003	0.4	0.230134370097538	preGC_IIb	0.708312177079883	1.46909192283235	1.43250792809211e-18
RGS2	sLGR5_male	0.392857142857143	0.160698143383631	0.393	0.165131982811541	sKITLG	0.70753973282151	1.80101022900021	4.14613393337637e-18
SLMAP	sLGR5_male	0.571428571428571	0.284472567971629	0.615	0.289952936361776	sLGR5_female	0.707449518616842	1.23803665757947	5.73687896249789e-21
MICAL1	sLGR5_male	0.303571428571429	0.0933871079897086	0.195	0.0974012686719869	preGC_IIc	0.706992370208187	2.32891604303873	2.78088973873353e-20
ID1	sLGR5_male	0.403571428571429	0.169529239969404	0.525	0.173999045085601	coelEpi	0.705727563789283	1.74870546779645	6.82272528880978e-18
SERPINE2	sLGR5_male	0.917857142857143	0.456366038523051	0.838	0.465179728531478	sKITLG	0.702464924360337	0.765331435100757	9.26622244644858e-57
DES	sLGR5_male	0.435714285714286	0.195327167790835	0.542	0.199918150194393	sKITLG	0.701433442563355	1.60984724522737	1.57057871911943e-17
KPNA2	sLGR5_male	0.553571428571429	0.276823586676865	0.48	0.2821089966578	preGC_IIb	0.700523479683035	1.26546176975	9.645635885442e-20
PLIN2	sLGR5_male	0.535714285714286	0.265697795702663	0.506	0.270854648386877	sKITLG	0.699735511503757	1.30617295480701	4.1467035120683e-19
EIF1AY	sLGR5_male	0.292857142857143	0.0881023572769627	0.408	0.0920128231362117	Sertoli_WFDC2	0.698706575135363	2.38582732973051	5.09238892104007e-20
APOBEC3G	sLGR5_male	0.367857142857143	0.145539253181281	0.438	0.149785144260282	Sertoli_WFDC2	0.698396423145753	1.89855338330884	1.20978491471255e-17
PCGF3	sLGR5_male	0.403571428571429	0.173075585842431	0.25	0.177477661823886	Sertoli_WFDC2	0.697738891199418	1.72891052686581	3.18499136417081e-17
INTS12	sLGR5_male	0.367857142857143	0.146929977053056	0.254	0.151149307687061	sLGR5_female	0.695061340076151	1.88948713807109	2.31441818689515e-17
TP53I11	sLGR5_male	0.25	0.0586885473889159	0.234	0.0623422686037787	preGC_I	0.693778903621029	2.77511561448411	3.19795258516617e-22
FHL3	sLGR5_male	0.332142857142857	0.120158542521382	0.325	0.124207080008185	coelEpi	0.692785267419968	2.08580510621066	5.78161453168686e-18
PRCP	sLGR5_male	0.617857142857143	0.320561852444197	0.423	0.326239683514085	sLGR5_female	0.692075960752244	1.12012294225797	9.44667081671427e-22
CNR1	sLGR5_male	0.253571428571429	0.0616786037132327	0.115	0.0653434281426915	preGC_IIb	0.691767810591735	2.7280984079674	9.31785804383253e-22
DNAJC15	sLGR5_male	0.357142857142857	0.140810792017245	0.361	0.144942364095219	Sertoli_WFDC2	0.68979253734991	1.93141910457975	4.20468714457945e-17
H2AFY2	sLGR5_male	0.75	0.392531812808567	0.619	0.399358843189414	sLGR5_female	0.688421182429835	0.917894909906447	7.93513782175863e-31
TCEAL7	sLGR5_male	0.610714285714286	0.318823447604478	0.526	0.324398062887934	sLGR5_female	0.687532327535065	1.12578392812759	5.31878685705968e-21
GNG2	sLGR5_male	0.535714285714286	0.273416313191016	0.746	0.278425755405498	Sertoli_WFDC2	0.684966344233111	1.27860384256847	6.58188122443742e-18
GSS	sLGR5_male	0.578571428571429	0.300813573464989	0.45	0.306118272969102	sLGR5_female	0.684903448839959	1.18378373873573	2.24693390209813e-19
RND3	sLGR5_male	0.364285714285714	0.148459773312009	0.424	0.152581679285178	sKITLG	0.684877260334678	1.88005522444813	1.43905746281403e-16
FAM122B	sLGR5_male	0.35	0.137890271886517	0.384	0.141941204556306	Sertoli_WFDC2	0.68331982584062	1.95234235954463	1.06190792635594e-16
LARP6	sLGR5_male	0.3	0.0986718587024546	0.205	0.102516881522406	Sertoli_WFDC2	0.683318338855587	2.27772779618529	2.79366053474411e-18
MEIS2	sLGR5_male	0.546428571428571	0.281691120228079	0.638	0.286747152308847	coelEpi	0.682573683760849	1.24915445394142	4.89704672432854e-18
ZNF431	sLGR5_male	0.8	0.418886030178708	0.671	0.426164654525612	sLGR5_female	0.682343595534994	0.852929494418743	1.51315382445374e-35
PXDN	sLGR5_male	0.478571428571429	0.236701202976149	0.459	0.241320510197122	sLGR5_female	0.68035117036887	1.42162931121853	2.87948613689064e-16
IDH2	sLGR5_male	0.442857142857143	0.211807245671372	0.472	0.216219903144397	sLGR5_female	0.67821769844393	1.53145931906694	1.0923086580658e-15
P3H1	sLGR5_male	0.507142857142857	0.258048814407899	0.45	0.262806084168883	sLGR5_female	0.677714698093997	1.33633884131211	1.35189905093854e-16
BCAS3	sLGR5_male	0.442857142857143	0.212641679994437	0.463	0.217038401200464	sKITLG	0.676544432689378	1.52768097704053	1.482011984928e-15
SMARCA4	sLGR5_male	0.721428571428571	0.385091440094569	0.532	0.391514903485438	sKITLG	0.676506438279214	0.937731696624652	3.42204540611592e-27
FAXC	sLGR5_male	0.192857142857143	0.0268409707252625	0.093	0.0300115953891276	sPAX8e	0.676190209955006	3.50617145902596	3.15698427501853e-26
MGAT4C	sLGR5_male	0.157142857142857	0.0107781100062583	0.055	0.0135734260964464	sLGR5_female	0.675657928190736	4.29964136121377	6.07243404208215e-32
NPNT	sLGR5_male	0.614285714285714	0.32772408038384	0.75	0.333196916990655	preGC_I	0.675113281754849	1.09902162146138	3.85690048743719e-20
DPP10	sLGR5_male	0.714285714285714	0.383978860997149	0.765	0.390287156401337	sLGR5_female	0.672051794520149	0.940872512328209	3.22543453714875e-26
GRAMD1A	sLGR5_male	0.567857142857143	0.301230790626521	0.415	0.306322897483118	preGC_I	0.671840594797263	1.18311551285053	6.58188122443742e-18
GSTA1	sLGR5_male	0.7	0.377233850219039	0.99	0.383398131096105	Sertoli_WFDC2	0.671076926055333	0.958681322936189	4.93474299573549e-25
FSTL1	sLGR5_male	0.453571428571429	0.223976079549405	0.409	0.228360957642726	sLGR5_female	0.669846874284893	1.4768277543289	3.96093394120181e-15
RNF146	sLGR5_male	0.542857142857143	0.286280509004937	0.429	0.291180683445877	sKITLG	0.669783276697879	1.2338112991803	6.62738219197106e-17
ACSS2	sLGR5_male	0.360714285714286	0.15235380015298	0.338	0.156333128708819	sLGR5_female	0.669401346137382	1.85576610810363	2.42240965789406e-15
IMMP2L	sLGR5_male	0.467857142857143	0.235727696265906	0.452	0.24016097128436	sLGR5_female	0.667372887673574	1.42644586678321	4.25869413025968e-15
FADS2	sLGR5_male	0.492857142857143	0.254293859954106	0.452	0.258850010231226	sLGR5_female	0.66609963022492	1.35150649610853	2.186437797978e-15
ARMH4	sLGR5_male	0.335714285714286	0.13545650511091	0.252	0.139281085874088	sLGR5_female	0.661780541421726	1.97126118721365	3.13018437434925e-15
POLB	sLGR5_male	0.410714285714286	0.195535776371601	0.301	0.199645317509038	sKITLG	0.66174815504762	1.61121289924638	2.54479076203762e-14
KNOP1	sLGR5_male	0.457142857142857	0.230860162714693	0.412	0.235181774776618	Sertoli_WFDC2	0.661666996184997	1.44739655415468	1.5626228422521e-14
UNC119	sLGR5_male	0.503571428571429	0.264446144218066	0.382	0.269013027760726	sLGR5_female	0.661187004644354	1.31299547021574	3.18313209251652e-15
CERCAM	sLGR5_male	0.335714285714286	0.135943258466032	0.313	0.13975854307346	sLGR5_female	0.66063167694193	1.96783903769936	3.84653406243561e-15
FBXL12	sLGR5_male	0.428571428571429	0.210764202767541	0.311	0.214923947888957	sKITLG	0.658916161791853	1.53747104418099	3.98229343643088e-14
HDAC3	sLGR5_male	0.521428571428571	0.278214310548641	0.414	0.282859286542528	sLGR5_female	0.658462985539339	1.26280572569188	2.02308472730955e-15
IRF2BP2	sLGR5_male	0.685714285714286	0.378763646477992	0.526	0.384625878180206	Sertoli_WFDC2	0.655189139747028	0.955484162131082	1.30575557025813e-22
MEX3A	sLGR5_male	0.446428571428571	0.227313816841666	0.347	0.231498533524316	sLGR5_female	0.653206133992899	1.46318174014409	8.50209638593519e-14
RHOG	sLGR5_male	0.507142857142857	0.272164661706418	0.418	0.276652342950685	sKITLG	0.651675346338389	1.28499364066725	1.4030705893932e-14
CENPVL3	sLGR5_male	0.246428571428571	0.0678673249426326	0.192	0.0712775390491781	sLGR5_female	0.650860741022198	2.64117402153935	2.53783209850362e-18
ST6GALNAC1	sLGR5_male	0.421428571428571	0.210138377025242	0.484	0.214173658004229	Sertoli_WFDC2	0.649407987965157	1.54096810703597	2.14391314741671e-13
PLAA	sLGR5_male	0.332142857142857	0.138029344273694	0.22	0.141736580042289	sKITLG	0.648935736885556	1.95378501427909	2.77911001269917e-14
AK3	sLGR5_male	0.482142857142857	0.25631040956818	0.344	0.260623422686038	sKITLG	0.648327248915479	1.34467873849136	7.33707450752717e-14
AGPAT5	sLGR5_male	0.353571428571429	0.156456435574717	0.263	0.160220994475138	preGC_IIb	0.647460424738057	1.83120120127935	1.01451242046571e-13
PLCG1	sLGR5_male	0.385714285714286	0.184062304429456	0.294	0.187913512038742	sLGR5_female	0.644826907678339	1.67177346435125	3.88857251022635e-13
POLR2B	sLGR5_male	0.457142857142857	0.239899867881232	0.351	0.244048837050679	sLGR5_female	0.644748307140389	1.4103869218696	2.84976003796211e-13
MAPK13	sLGR5_male	0.464285714285714	0.24622766149781	0.522	0.250392196985199	sLGR5_female	0.642908872562093	1.38472680244143	3.2321777845742e-13
SPATC1L	sLGR5_male	0.378571428571429	0.179264307071831	0.402	0.183070731873678	Sertoli_WFDC2	0.642769874684819	1.69788268784669	4.855681154631e-13
CYTH2	sLGR5_male	0.467857142857143	0.250747514081079	0.338	0.254893936293568	sLGR5_female	0.639517557483265	1.36690775645278	5.17452091745873e-13
AC087463.4	sLGR5_male	0.182142857142857	0.0269105069188513	0.193	0.0298751790464498	sLGR5_female	0.639453896620188	3.51072727556182	1.27465980326181e-23
LINC00665	sLGR5_male	0.535714285714286	0.298936096238092	0.532	0.303458154286884	sLGR5_female	0.638845475963691	1.19251155513222	2.54479076203762e-14
ACAA1	sLGR5_male	0.521428571428571	0.289340101522843	0.431	0.293772593956756	sLGR5_female	0.638723564032452	1.22494930088415	6.09685542122064e-14
MMP14	sLGR5_male	0.403571428571429	0.201654961407413	0.351	0.205511220244185	sKITLG	0.638552768176071	1.58225464680796	1.39194724942683e-12
CHRNA7	sLGR5_male	0.232142857142857	0.0606355608094013	0.31	0.063911056544574	sLGR5_female	0.638453888358892	2.75026290369984	3.15696756619822e-18
CDK16	sLGR5_male	0.557142857142857	0.313399624504555	0.427	0.318054702953414	sLGR5_female	0.638224909658112	1.14553188912994	6.50537327925008e-15
EPB41	sLGR5_male	0.317857142857143	0.130728043946874	0.26	0.134301889366346	sLGR5_female	0.638150694820083	2.00766510729914	8.50209638593519e-14
HMGB3	sLGR5_male	0.525	0.292469230234337	0.526	0.296910169838347	sKITLG	0.637520963302633	1.21432564438597	6.09685542122064e-14
NT5C3B	sLGR5_male	0.496428571428571	0.272720951255128	0.448	0.27699338380738	sLGR5_female	0.637295966060798	1.28376165825197	2.65740783942492e-13
GPSM1	sLGR5_male	0.285714285714286	0.104095681802378	0.224	0.107564286201487	Sertoli_WFDC2	0.637047599707207	2.22966659897523	7.23152018791172e-15
MRPL47	sLGR5_male	0.610714285714286	0.347611431750226	0.498	0.35263624582225	sKITLG	0.636558626259	1.04231821843579	7.51381471552074e-17
PTK2	sLGR5_male	0.521428571428571	0.29059175300744	0.398	0.295000341040857	sKITLG	0.63654892828412	1.22077876657228	8.75997433458193e-14
ZNF714	sLGR5_male	0.421428571428571	0.217370141158473	0.362	0.221267307823477	sLGR5_female	0.635676017653391	1.50838377070296	2.25135085646744e-12
VAPB	sLGR5_male	0.382142857142857	0.186009317849941	0.252	0.189755132664893	sLGR5_female	0.635129382284542	1.66202081345488	1.96597581776461e-12
E2F4	sLGR5_male	0.428571428571429	0.223280717613518	0.347	0.227201418729964	sKITLG	0.635107863319108	1.48191834774458	2.34347769261429e-12
STARD3NL	sLGR5_male	0.496428571428571	0.274250747514081	0.403	0.278493963576836	sLGR5_female	0.634613879828563	1.27835889461869	4.15218103018432e-13
NELL1	sLGR5_male	0.182142857142857	0.0278144774355052	0.119	0.0307618852738558	sLGR5_female	0.634126504172196	3.48147884643559	4.8545054944949e-23
CYTL1	sLGR5_male	0.403571428571429	0.20401919198943	0.638	0.207830298069709	coelEpi	0.634024196377281	1.57103340695256	2.98001488625197e-12
PDZRN3	sLGR5_male	0.378571428571429	0.183645087267923	0.385	0.187367846668031	preGC_I	0.633986567797704	1.67468149984299	2.24824466205306e-12
USB1	sLGR5_male	0.289285714285714	0.108406925804881	0.280839895013123	0.111861400995839	FetalLeydig-like	0.633678813838292	2.19049466512002	1.9724551195107e-14
SIAH2	sLGR5_male	0.375	0.180933175717961	0.308	0.184639519814474	preGC_IIb	0.633506211121486	1.68934989632396	2.25710463614461e-12
ZNF821	sLGR5_male	0.360714285714286	0.169320631388638	0.306	0.172975922515517	sLGR5_female	0.632910321101771	1.75460287038115	1.71297632082679e-12
GOLGA8B	sLGR5_male	0.485714285714286	0.267644809123149	0.377	0.271809562785622	Sertoli_WFDC2	0.632717460289632	1.30265359471395	8.90969394891434e-13
TNPO1	sLGR5_male	0.575	0.328210833738961	0.494	0.3329240843053	sKITLG	0.632408454279392	1.09984079005112	4.35139585861045e-15
R3HDM4	sLGR5_male	0.389285714285714	0.193658299144705	0.323	0.197394447854853	sKITLG	0.631636033512161	1.62255127874684	3.94318051092303e-12
RAMMET	sLGR5_male	0.560714285714286	0.320075099089076	0.511	0.32467089557329	sLGR5_female	0.630771744563962	1.1249432387128	1.80974847042343e-14
DHRS7	sLGR5_male	0.55	0.313260552117377	0.435	0.317781870268058	preGC_I	0.630514540766807	1.14639007412147	4.08903339108706e-14
MPP6	sLGR5_male	0.485714285714286	0.269174605382101	0.538	0.273310142555078	sLGR5_female	0.63004335086103	1.29714807530212	1.39194724942683e-12
C3orf58	sLGR5_male	0.557142857142857	0.318336694249357	0.727	0.322897483118478	sLGR5_female	0.629805649124415	1.13042039586434	2.77063237949953e-14
PFKFB3	sLGR5_male	0.364285714285714	0.174118628746262	0.44	0.177750494509242	preGC_IIb	0.629257827435194	1.72737442825347	3.54651703065692e-12
FGFR1	sLGR5_male	0.710714285714286	0.406925804881441	0.731	0.412727644771844	sLGR5_female	0.628958944656688	0.884967359315943	4.05691359374356e-22
IFRD1	sLGR5_male	0.453571428571429	0.245949516723455	0.416	0.249914739785826	sLGR5_female	0.628938226565425	1.38663546014424	4.36510856921454e-12
NLRP1	sLGR5_male	0.539285714285714	0.307210903275155	0.534	0.311643134847555	preGC_I	0.628751350716514	1.16589654437499	1.12107988203309e-13
CTDSP2	sLGR5_male	0.575	0.330783672901745	0.413	0.33544778664484	preGC_I	0.628066153818223	1.09228896316213	9.41573704653031e-15
VEGFA	sLGR5_male	0.425	0.224462832904527	0.544	0.228292749471387	preGC_IIb	0.627778756008949	1.47712648472694	8.09949914783247e-12
TTYH3	sLGR5_male	0.382142857142857	0.190042417078089	0.315	0.193711206602551	preGC_IIc	0.627244262363508	1.64138685478301	7.491206546814e-12
RAE1	sLGR5_male	0.539285714285714	0.308532090953341	0.453	0.312939090102994	sKITLG	0.626513403075141	1.161746707689	1.63267365853212e-13
IWS1	sLGR5_male	0.407142857142857	0.211042347541896	0.306	0.214787531546279	sLGR5_female	0.626228857112305	1.53810596483724	1.10032349456937e-11
RASL12	sLGR5_male	0.367857142857143	0.179055698491065	0.416	0.182661482845645	Sertoli_WFDC2	0.625401528384915	1.70012065968715	7.58300745067494e-12
MRGBP	sLGR5_male	0.378571428571429	0.188512620819136	0.296	0.192142418661756	Sertoli_WFDC2	0.624460543980573	1.64951841806189	1.11100073442364e-11
C20orf96	sLGR5_male	0.442857142857143	0.240386621236354	0.382	0.244253461564695	sKITLG	0.624228761344783	1.40954881593983	1.15579903345819e-11
FADS1	sLGR5_male	0.525	0.300535428690633	0.425	0.304822317713662	sKITLG	0.623713774427527	1.18802623700481	6.13572317279479e-13
GLCE	sLGR5_male	0.367857142857143	0.179959669007719	0.335	0.183548189073051	sLGR5_female	0.623620134381321	1.69527803521136	1.01440644616388e-11
TAB3	sLGR5_male	0.307142857142857	0.128294277171268	0.384	0.131709978855467	Sertoli_WFDC2	0.622625534649423	2.02715290350975	6.89247060316653e-13
MTA3	sLGR5_male	0.510714285714286	0.291634795911272	0.448	0.295818839096924	preGC_I	0.622054107216837	1.2180080421029	1.72662655599989e-12
MSMO1	sLGR5_male	0.767857142857143	0.438981990125861	0.665	0.445262942500512	Sertoli_WFDC2	0.621265757850997	0.809090289294322	2.71391371050964e-26
STAR	sLGR5_male	0.860714285714286	0.478687156665044	0.976377952755906	0.485983220789851	FetalLeydig-like	0.621075230618359	0.721581180801413	1.58760832725845e-37
CMTM3	sLGR5_male	0.610714285714286	0.35748557123983	0.59	0.362321806152377	preGC_I	0.620010880741861	1.01522249478199	1.482011984928e-15
RHOT2	sLGR5_male	0.425	0.228913149294208	0.336	0.232658072437078	sKITLG	0.619728796495838	1.45818540351962	3.05600042922343e-11
SLC4A4	sLGR5_male	0.164285714285714	0.0205131771086851	0.1	0.0232589864265739	sLGR5_female	0.617889037850423	3.76106370865475	7.5411259777599e-24
PLEKHG4B	sLGR5_male	0.214285714285714	0.0529170433210486	0.124	0.0559989086692586	sLGR5_female	0.617662087818393	2.88242307648584	9.1878208503163e-18
SHC1	sLGR5_male	0.346428571428571	0.164731242611779	0.296	0.168201350521792	sLGR5_female	0.617541320409841	1.78259350221397	1.45606177884711e-11
SQLE	sLGR5_male	0.685714285714286	0.401015228426396	0.557	0.406452493008662	Sertoli_WFDC2	0.617340497274025	0.900288225191286	2.14079664163659e-19
CADM2	sLGR5_male	0.217857142857143	0.0558375634517767	0.174	0.0589318600368324	sLGR5_female	0.616834923018524	2.83137341713421	2.3072489937874e-17
DNAAF2	sLGR5_male	0.492857142857143	0.282108337389611	0.432	0.286133278766796	sLGR5_female	0.616710943753929	1.25129756703696	9.12332651992300e-12
TRAF4	sLGR5_male	0.339285714285714	0.159516028092622	0.304	0.162949321328695	sLGR5_female	0.615571513100654	1.81431603861246	1.51638427342796e-11
SLC2A3	sLGR5_male	0.610714285714286	0.360475627564147	0.748	0.365254757519951	preGC_IIb	0.615087124009454	1.00716020305642	3.46737206311691e-15
ZNF71	sLGR5_male	0.271428571428571	0.100479799735762	0.15	0.103744628606507	sKITLG	0.615009071141435	2.26582289367897	1.12257280347967e-13
TOX4	sLGR5_male	0.535714285714286	0.313260552117377	0.448	0.317509037582702	sLGR5_female	0.614597676550231	1.1472489962271	1.4736961543109e-12
COPB2	sLGR5_male	0.639285714285714	0.377511994993394	0.533	0.382511424868699	sLGR5_female	0.614351498368097	0.960996757223839	1.75133233901603e-16
PTS	sLGR5_male	0.685714285714286	0.403101314234059	0.612	0.40849873814883	Sertoli_WFDC2	0.613896996804893	0.895266453673802	4.13517913301701e-19
APLNR	sLGR5_male	0.139285714285714	0.00973506710242681	0.073	0.0122092626696678	sLGR5_female	0.613631624370724	4.40556038009751	6.31379136758349e-28
CHMP1B	sLGR5_male	0.442857142857143	0.246436270078576	0.373	0.250187572471182	sLGR5_female	0.613598213277417	1.38554435256191	6.43433629053731e-11
ARRDC3	sLGR5_male	0.446428571428571	0.249287254015715	0.423	0.253052315667417	sKITLG	0.613463852828921	1.37415903033678	6.17308052901013e-11
WDR33	sLGR5_male	0.639285714285714	0.378485501703637	0.56	0.383466339267444	sKITLG	0.612757552751607	0.958503434471787	2.33313574871252e-16
UBE2G1	sLGR5_male	0.435714285714286	0.241499200333774	0.401	0.24520837596344	sLGR5_female	0.61246044187693	1.40564691578312	8.6528981294515e-11
RPRM	sLGR5_male	0.671428571428571	0.396425839649538	0.734	0.401677921014938	sLGR5_female	0.612413157724337	0.912104702993694	4.21224281080411e-18
FAM92A	sLGR5_male	0.510714285714286	0.297475836172728	0.452	0.301548325489394	preGC_I	0.612257049542925	1.19882499211202	8.41362823786846e-12
HPCAL1	sLGR5_male	0.596428571428571	0.353661080592448	0.696	0.35829752404338	ovarianSurf	0.612169254829924	1.0263915649843	2.23973205254377e-14
GABARAPL1	sLGR5_male	0.367857142857143	0.18663514359224	0.313	0.190096173521588	coelEpi	0.610725683289288	1.66022515845632	8.75230713720728e-11
KDM1A	sLGR5_male	0.628571428571429	0.373965649120367	0.532	0.378828183616397	sKITLG	0.610137011359241	0.97067251807152	1.2923217455688e-15
HMGCR	sLGR5_male	0.432142857142857	0.240386621236354	0.42	0.244048837050679	Sertoli	0.609488634093649	1.4103869218696	1.44907583601989e-10
GALNTL6	sLGR5_male	0.217857142857143	0.0581322578402058	0.228	0.061182729691017	sLGR5_female	0.608668963416598	2.79389032387947	1.35932650985776e-16
GPRC5C	sLGR5_male	0.292857142857143	0.122314164522634	0.31	0.125571243434964	coelEpi	0.607644015663662	2.07488200470519	3.43243613288319e-12
GRIK2	sLGR5_male	0.253571428571429	0.0883109658577289	0.307	0.0914671577655003	sLGR5_female	0.606485880316491	2.39177530265659	6.94020489261118e-14
CHORDC1	sLGR5_male	0.471428571428571	0.272442806480773	0.482	0.276243093922652	sLGR5_female	0.60648061218062	1.28647402583768	9.98802552510288e-11
SCD	sLGR5_male	0.457142857142857	0.261664696474515	0.477	0.265397994679763	preGC_IIc	0.606411297350268	1.32652471295371	1.49574737791744e-10
FASN	sLGR5_male	0.375	0.195118559210069	0.274	0.198553986767615	Sertoli	0.60626034082224	1.61669424219264	2.09662623280117e-10
WDR45	sLGR5_male	0.457142857142857	0.261803768861692	0.392	0.26553441102244	sLGR5_female	0.60617638323557	1.32601083832781	1.55211443103384e-10
TRIM8	sLGR5_male	0.432142857142857	0.242681315624783	0.434	0.246299706704863	Sertoli_WFDC2	0.605521235442706	1.40120616466081	2.71065096270771e-10
GRK6	sLGR5_male	0.278571428571429	0.110562547806133	0.155	0.113771229793329	preGC_IIb	0.605493275126881	2.17356560301957	1.41224207217244e-12
MCM2	sLGR5_male	0.260714285714286	0.095055976635839	0.175	0.098219766728054	sKITLG	0.604999960413857	2.32054779336822	2.21820916848412e-13
PDHA1	sLGR5_male	0.532142857142857	0.316737361796815	0.458	0.32085123797831	sLGR5_female	0.60492813127718	1.1367776963598	8.64683002027595e-12
VPS72	sLGR5_male	0.585714285714286	0.351853139559141	0.48	0.356319487074552	sLGR5_female	0.604414687346599	1.031927514982	2.10054290353861e-13
LPAR1	sLGR5_male	0.210714285714286	0.0538905500312913	0.306	0.0568856148966646	sPAX8m	0.60405733653997	2.86671278357952	8.85596916367787e-17
SFXN1	sLGR5_male	0.653571428571429	0.391905987066268	0.687	0.396903349021213	sLGR5_female	0.603940835980471	0.924062481281595	2.04915086300057e-16
SLC44A2	sLGR5_male	0.45	0.257701133439955	0.378	0.261373712570766	coelEpi	0.603811821081381	1.34180404684751	2.64396395315748e-10
GLB1	sLGR5_male	0.367857142857143	0.19052917043321	0.265	0.193915831116568	sLGR5_female	0.603407502327101	1.64033107428726	2.86672882098545e-10
TBCC	sLGR5_male	0.364285714285714	0.18774772268966	0.294	0.191119296091672	sKITLG	0.602840931507907	1.65485745904131	2.88885779822677e-10
PTPRK	sLGR5_male	0.314285714285714	0.143731312147973	0.271	0.146988609235386	sLGR5_female	0.602611486211559	1.91740018340042	3.8153060769071e-11
CRIP2	sLGR5_male	0.514285714285714	0.306028787984146	0.73	0.31000613873542	ovarianSurf	0.602312492225152	1.17116317932669	3.46545710345754e-11
DCHS1	sLGR5_male	0.310714285714286	0.140880328210834	0.302	0.144123866039151	sLGR5_female	0.601879102300115	1.93708216832221	3.47182162980827e-11
MYH7B	sLGR5_male	0.175	0.0294138098880467	0.128	0.0321942568719733	Sertoli_WFDC2	0.601294260061724	3.43596720035271	1.8695733463912e-20
SLC39A7	sLGR5_male	0.439285714285714	0.250886586468257	0.383	0.254484687265534	sLGR5_female	0.601168919157872	1.36851461271711	4.79813992625683e-10
MMP2	sLGR5_male	0.596428571428571	0.360475627564147	0.667	0.364981924834595	sKITLG	0.601144799120365	1.00790744762696	1.44322189984811e-13
INTS8	sLGR5_male	0.282142857142857	0.115847298518879	0.177	0.119023258986427	ovarianSurf	0.60052311340299	2.12843635130174	4.91161694355782e-12
PSMD14	sLGR5_male	0.475	0.278770600097351	0.389	0.282518245685833	sLGR5_female	0.600405768391799	1.26401214398273	2.3213883160669e-10
PSMD2	sLGR5_male	0.714285714285714	0.426743620054238	0.547	0.432235181774777	sLGR5_female	0.59913245472482	0.838785436614747	7.68018393031967e-20
BIK	sLGR5_male	0.221428571428571	0.0638342257144844	0.33	0.0668440079121479	sLGR5_female	0.599051443160593	2.70539361427365	2.15048677579699e-15
CA11	sLGR5_male	0.357142857142857	0.183645087267923	0.348	0.186958597639997	coelEpi	0.5988814605841	1.67686808963548	4.54711885769569e-10
TSPYL5	sLGR5_male	0.332142857142857	0.161532577706696	0.239	0.164790941954846	preGC_I	0.598879354643468	1.80307762688356	1.83853357270554e-10
MAP4K4	sLGR5_male	0.6	0.364091509630763	0.646	0.368596957915558	Sertoli_WFDC2	0.598830892114905	0.998051486858175	1.5423094029766e-13
ZNF260	sLGR5_male	0.367857142857143	0.193032473402406	0.303	0.196371325284769	sLGR5_female	0.598778690066383	1.62774789532609	5.96877700159392e-10
PGM2L1	sLGR5_male	0.246428571428571	0.0849732285654683	0.222	0.088056749198554	sLGR5_female	0.598765685219007	2.42977379509162	1.19117646237842e-13
ID3	sLGR5_male	0.55	0.333217439677352	0.78	0.33735761544233	Sertoli_WFDC2	0.597636455821297	1.0866117378569	9.18325289275383e-12
PARP6	sLGR5_male	0.328571428571429	0.15909881093109	0.231	0.162335447786645	sLGR5_female	0.597372566332473	1.81809041927274	1.99892600783215e-10
DCAF15	sLGR5_male	0.303571428571429	0.136708156595508	0.224	0.139894959416138	Sertoli_WFDC2	0.597083540602143	1.96686342786588	4.95912077419296e-11
HAUS1	sLGR5_male	0.392857142857143	0.215492663931576	0.339	0.218880021826615	sKITLG	0.596840964039732	1.51923154482841	1.15323070253422e-09
TSPAN7	sLGR5_male	0.489285714285714	0.291704332104861	0.477	0.295477798240229	sLGR5_female	0.596518343432077	1.21916157781738	2.56520728842193e-10
JAM2	sLGR5_male	0.378571428571429	0.203601974827898	0.714	0.206943591842303	Sertoli_WFDC2	0.596366988425562	1.57530902602979	1.06362834405937e-09
REPS1	sLGR5_male	0.471428571428571	0.278561991516584	0.57	0.282245413000477	Sertoli_WFDC2	0.596346925884023	1.26497832763278	4.79813992625683e-10
USP39	sLGR5_male	0.403571428571429	0.224949586259648	0.341	0.228360957642726	sLGR5_female	0.596005486568448	1.4768277543289	1.36185302615018e-09
CCNG2	sLGR5_male	0.357142857142857	0.185313955914053	0.289	0.188595593752132	preGC_IIb	0.595767954279225	1.66815027198183	7.46351583242967e-10
PLEKHO1	sLGR5_male	0.385714285714286	0.210138377025242	0.354	0.21349157629084	sKITLG	0.595603762355854	1.54415790240407	1.31152828087221e-09
PDK1	sLGR5_male	0.5	0.30018774772269	0.718	0.304003819657595	preGC_IIb	0.595357506495854	1.19071501299171	1.9820222155003e-10
CYYR1	sLGR5_male	0.289285714285714	0.124608858911063	0.327	0.127753904917809	sPAX8m	0.595248600582244	2.05764948349418	2.35717745650242e-11
MTF2	sLGR5_male	0.532142857142857	0.322926083026215	0.467	0.326921765227474	sLGR5_female	0.594954012964344	1.11803438677863	4.22799060720574e-11
RC3H1	sLGR5_male	0.389285714285714	0.213754259091857	0.275	0.217106609371803	sLGR5_female	0.594582059619724	1.52736675865617	1.57565669556421e-09
CSNK1D	sLGR5_male	0.517857142857143	0.313399624504555	0.455	0.317304413068686	preGC_IIb	0.594444937440921	1.14789367229971	9.88285538084207e-11
HGS	sLGR5_male	0.392857142857143	0.216883387803352	0.276	0.220244185253393	Sertoli_WFDC2	0.594400091677853	1.51301841517999	1.66629482402585e-09
BLOC1S4	sLGR5_male	0.428571428571429	0.246575342465753	0.362	0.250051156128504	preGC_IIb	0.594038467516549	1.38608975753861	1.6282984972696e-09
BZW2	sLGR5_male	0.435714285714286	0.252346846533621	0.57	0.255848850692313	sKITLG	0.593951961337421	1.36316843585638	1.50681770096219e-09
CHD4	sLGR5_male	0.607142857142857	0.371601418538349	0.555	0.37609985676284	Sertoli_WFDC2	0.593725360858103	0.977900594354522	1.86110666856855e-13
MAML3	sLGR5_male	0.335714285714286	0.167443154161741	0.336	0.170656844689994	sLGR5_female	0.593576594720258	1.76810049491141	5.09474621139906e-10
C14orf132	sLGR5_male	0.178571428571429	0.0332383005354287	0.082	0.0360139144669531	sLGR5_female	0.593544625398572	3.323849902232	3.4661200186955e-19
SMYD3	sLGR5_male	0.360714285714286	0.189694736110145	0.328	0.192960916717823	sLGR5_female	0.593471532422523	1.6452676146367	1.17870572991031e-09
SREBF2	sLGR5_male	0.446428571428571	0.261317015506571	0.43	0.264852329309051	Sertoli_WFDC2	0.593117346520802	1.3285828562066	1.43422452150776e-09
USP46	sLGR5_male	0.382142857142857	0.208747653153466	0.55	0.212059204692722	sLGR5_female	0.592661450068242	1.55088977587951	1.95968839677509e-09
MEF2C	sLGR5_male	0.382142857142857	0.209025797927821	0.429	0.212332037378078	sLGR5_female	0.592170105921937	1.54960401549666	2.11425853344254e-09
MCTS1	sLGR5_male	0.632142857142857	0.387525206870176	0.556	0.392196985198827	sLGR5_female	0.59168005796427	0.935991052146868	2.1478038829442e-14
ECHDC1	sLGR5_male	0.475	0.284194423197274	0.422	0.287838483050269	Sertoli_WFDC2	0.591543994981398	1.24535577890821	8.88772479991493e-10
SP3	sLGR5_male	0.407142857142857	0.230721090327515	0.444	0.234090444035195	sLGR5_female	0.59119085959881	1.45204772533041	2.82754233268919e-09
NR2F2	sLGR5_male	0.907142857142857	0.513663862040192	0.892	0.521178637200737	preGC_I	0.591150911649419	0.651662422290698	2.55128580933701e-42
HBZ	sLGR5_male	0.142857142857143	0.01349002155622	0.0603674540682415	0.0159607120933088	FetalLeydig-like	0.591089295797223	4.13762507058056	1.67791879025419e-24
LRRC42	sLGR5_male	0.489285714285714	0.295320214171476	0.482	0.299024623149853	sLGR5_female	0.590680078398309	1.20722935731041	6.15487420698005e-10
CYP11A1	sLGR5_male	0.435714285714286	0.254363396147695	0.788	0.257826887661142	Sertoli_WFDC2	0.590596290977161	1.35546689732463	2.49678587942059e-09
KLHL7	sLGR5_male	0.407142857142857	0.231138307489048	0.342	0.234499693063229	preGC_IIb	0.590479692855298	1.45030099999547	3.1465391440975e-09
WASF1	sLGR5_male	0.510714285714286	0.311244002503303	0.502	0.315053543414501	sKITLG	0.58988147356284	1.15501267550766	2.83829701595268e-10
RGS5	sLGR5_male	0.253571428571429	0.0947082956678951	0.244	0.0977423095286815	sKITLG	0.589660263663631	2.32542075811009	1.74331701008116e-12
GTF2E2	sLGR5_male	0.410714285714286	0.234615117168486	0.34	0.237978309801514	Sertoli_WFDC2	0.589611466594362	1.43557574475149	3.55090483552291e-09
SLC16A3	sLGR5_male	0.403571428571429	0.22877407690703	0.566	0.232112407066367	preGC_IIb	0.58942959568722	1.46053351143736	3.66810412635143e-09
SYNE1	sLGR5_male	0.310714285714286	0.147069049440234	0.303	0.150194393288316	sLGR5_female	0.589059869903717	1.89582486865564	3.05202642177153e-10
SPATS2	sLGR5_male	0.432142857142857	0.252624991307976	0.374	0.25605347520633	sKITLG	0.588738018656461	1.36236896879181	3.44126837709425e-09
DPF2	sLGR5_male	0.560714285714286	0.34629024407204	0.459	0.350385376168065	sKITLG	0.588033213960523	1.048721655471	2.07804918074851e-11
ZNF664	sLGR5_male	0.453571428571429	0.270009039705167	0.366	0.273514767069095	preGC_I	0.588009848342791	1.29639966563765	2.66046458722166e-09
LST1	sLGR5_male	0.15	0.0174535845907795	0.086	0.0199849942023054	sKITLG	0.58691603653818	3.9127735769212	1.07669050554183e-22
CAMSAP3	sLGR5_male	0.382142857142857	0.212363535220082	0.459	0.215606029602346	Sertoli	0.586322731029726	1.53430247372265	5.11509872528729e-09
TMEM11	sLGR5_male	0.467857142857143	0.282038801196023	0.402	0.285587613396085	sKITLG	0.586321575033589	1.25320641991912	2.38579688976971e-09
BOD1	sLGR5_male	0.682142857142857	0.418329740629998	0.574	0.423368119500716	preGC_I	0.586310803318574	0.859513219524612	1.17038569744587e-16
OLFM3	sLGR5_male	0.246428571428571	0.0896321535359154	0.258	0.0926266966782621	sKITLG	0.58629740560555	2.37917787781962	1.34127415158229e-12
ARIH1	sLGR5_male	0.425	0.24845281969265	0.379	0.251824568583316	preGC_IIb	0.586084600884097	1.37902259031552	5.49974782943031e-09
CDKN1C	sLGR5_male	0.653571428571429	0.403170850427648	0.744	0.407953072778119	sKITLG	0.585994187812673	0.896603128893708	4.982467108054e-15
LDB2	sLGR5_male	0.217857142857143	0.0650163410054934	0.241	0.0679353386535707	sKITLG	0.58586119510562	2.68919892835367	1.73254062739351e-14
GNL2	sLGR5_male	0.367857142857143	0.200194701342049	0.303	0.203396766932679	ovarianSurf	0.585848068332853	1.59259669061358	4.44007365152946e-09
ACTL6A	sLGR5_male	0.457142857142857	0.27432028370767	0.416	0.277811881863447	sKITLG	0.585513635789647	1.28081107828985	3.53170078357303e-09
CUL4B	sLGR5_male	0.439285714285714	0.26083026215145	0.695	0.264238455767001	Sertoli_WFDC2	0.584646825223117	1.33090334197132	5.65888364873752e-09
NUP58	sLGR5_male	0.432142857142857	0.255267366664349	0.442	0.258645385717209	preGC_IIb	0.584385628679163	1.35229732256335	6.54460934831123e-09
OAZ2	sLGR5_male	0.528571428571429	0.327306863222307	0.447	0.331150671850488	granulosa	0.584167525612501	1.10518180521284	2.75556064094929e-10
SUSD1	sLGR5_male	0.214285714285714	0.0626521104234754	0.238	0.0655480526567083	Sertoli_WFDC2	0.583922523635994	2.72497177696797	1.3393804928193e-14
PPFIBP1	sLGR5_male	0.489285714285714	0.299770530561157	0.42	0.303389946115545	granulosa	0.583588856968125	1.19273635000785	1.77925249493468e-09
RCC2	sLGR5_male	0.353571428571429	0.18886030178708	0.283	0.192006002319078	Sertoli_WFDC2	0.58347369961101	1.65022864536447	4.56928045312722e-09
RNF24	sLGR5_male	0.353571428571429	0.188929837980669	0.363	0.192074210490417	preGC_IIb	0.583348119276331	1.64987346866033	4.65776606209347e-09
ID2	sLGR5_male	0.471428571428571	0.286628189972881	0.558	0.290157560875793	coelEpi	0.583313275369667	1.23733119017808	3.35130993102662e-09
PSME4	sLGR5_male	0.410714285714286	0.238509144009457	0.591	0.241797967396494	Sertoli_WFDC2	0.583071663934944	1.41965274697204	9.46611071663821e-09
HIST1H2AC	sLGR5_male	0.567857142857143	0.354495514915514	0.647	0.358570356728736	sLGR5_female	0.582411540121042	1.02563038511882	3.05600042922343e-11
FLAD1	sLGR5_male	0.328571428571429	0.166886864613031	0.256	0.169974762976605	sLGR5_female	0.582263171981588	1.77210530603092	2.29602241641726e-09
FANCF	sLGR5_male	0.307142857142857	0.147347194214589	0.216	0.150399017802333	preGC_I	0.581870900831891	1.89446339805732	8.08336845375146e-10
PRKD1	sLGR5_male	0.425	0.251164731242612	0.401	0.254484687265534	granulosa	0.58161871040477	1.36851461271711	1.06722031289588e-08
XBP1	sLGR5_male	0.621428571428571	0.388220568806064	0.666	0.392674442398199	sLGR5_female	0.580895520784526	0.934774401262455	3.96799049236918e-13
LUC7L	sLGR5_male	0.610714285714286	0.381962311383075	0.525	0.386331082463679	sLGR5_female	0.580826264809162	0.951060550564709	1.13994980546146e-12
PSMD9	sLGR5_male	0.664285714285714	0.413253598498018	0.768	0.41804788213628	sLGR5_female	0.579362965200611	0.872159302452533	4.29656903480471e-15
MARCH5	sLGR5_male	0.535714285714286	0.335303525485015	0.489	0.339131027897142	sLGR5_female	0.579304678557676	1.08136873330766	3.87059974280032e-10
GSPT2	sLGR5_male	0.339285714285714	0.178360336555177	0.372	0.181433735761544	Sertoli_WFDC2	0.579114837483712	1.70686478416252	5.67407567484644e-09
NLGN4Y	sLGR5_male	0.157142857142857	0.0225297267227592	0.103	0.0251006070527249	Sertoli_WFDC2	0.579049938935181	3.68486324776933	1.22678707618843e-20
HSPA4	sLGR5_male	0.592857142857143	0.372366316667826	0.512	0.376577313962213	sLGR5_female	0.579003200023573	0.97663190365422	7.45610607793471e-12
PTP4A1	sLGR5_male	0.628571428571429	0.393644391905987	0.583	0.398131096105313	preGC_IIb	0.578897905604526	0.920973940734473	2.69048504979178e-13
PARVA	sLGR5_male	0.385714285714286	0.21980390793408	0.374	0.22297251210695	Sertoli_WFDC2	0.578844043411135	1.50070677921405	1.63142130808615e-08
DMAC2	sLGR5_male	0.353571428571429	0.191502677143453	0.267	0.194597912829957	sKITLG	0.578732727277685	1.63681983472476	9.50294136273820e-09
TNNI1	sLGR5_male	0.271428571428571	0.115847298518879	0.364	0.11881863447241	coelEpi	0.578185479171293	2.13015702852582	9.78781120915003e-11
NGDN	sLGR5_male	0.525	0.328906195674849	0.459	0.332651251619944	sKITLG	0.577846830869811	1.10066063022821	8.57826258983553e-10
RBPMS2	sLGR5_male	0.246428571428571	0.0930394270217648	0.206	0.0959688970738694	sKITLG	0.577562313888741	2.34373112882388	6.94820045807454e-12
PJA1	sLGR5_male	0.560714285714286	0.353313399624505	0.521	0.357274401473296	Sertoli_WFDC2	0.577115829488162	1.02925116087061	1.13183572067749e-10
MICU1	sLGR5_male	0.621428571428571	0.390723871775259	0.585	0.395129936566401	sKITLG	0.577021667794448	0.92854061484164	7.592903522614e-13
MICAL2	sLGR5_male	0.335714285714286	0.176343786941103	0.479	0.179387490621376	Sertoli_WFDC2	0.576826656114452	1.71820706076645	7.15410683414596e-09
NUAK1	sLGR5_male	0.246428571428571	0.0933871079897086	0.211	0.0963099379305641	sPAX8e	0.576688142800251	2.34018376788508	8.1038808527189e-12
PABPC4	sLGR5_male	0.510714285714286	0.320214171476253	0.441	0.323852397517223	sKITLG	0.57581372328516	1.12746743020871	2.30915834946921e-09
HDHD3	sLGR5_male	0.35	0.190320561852444	0.381	0.193370165745856	preGC_I	0.575102139421744	1.64314896977641	1.48898551374911e-08
ATXN2L	sLGR5_male	0.417857142857143	0.249495862596481	0.355	0.252711274810722	Sertoli_WFDC2	0.574765695858375	1.37550764820808	3.09390030576537e-08
ZNF503	sLGR5_male	0.535714285714286	0.338363118002921	0.666	0.342132187436055	preGC_I	0.574584698370808	1.07255810362551	7.84129728853992e-10
MARS	sLGR5_male	0.335714285714286	0.177595438425701	0.262	0.180615237705477	sLGR5_female	0.574536818838744	1.71138626888137	1.02137111011165e-08
CLIP3	sLGR5_male	0.475	0.294972533203532	0.496	0.298410749607803	Sertoli_WFDC2	0.574410083894611	1.20928438714655	1.09676702390507e-08
PRPF19	sLGR5_male	0.428571428571429	0.258883248730964	0.364	0.262124002455494	Sertoli_WFDC2	0.57383039801718	1.33893759537342	3.20596410185034e-08
TOGARAM1	sLGR5_male	0.382142857142857	0.21980390793408	0.321	0.222904303935611	sLGR5_female	0.573601293234092	1.50101272995837	3.44168358767031e-08
CCBE1	sLGR5_male	0.260714285714286	0.10792017244976	0.478	0.110838278425755	granulosa	0.573488805913333	2.19968309117443	7.65673672989891e-11
CSMD3	sLGR5_male	0.225	0.075377233850219	0.27	0.0782347725257486	sLGR5_female	0.573309240482001	2.54804106880889	7.29835118008983e-13
VBP1	sLGR5_male	0.553571428571429	0.351366386204019	0.511	0.355228156333129	sLGR5_female	0.572943661849029	1.03499500204986	3.44123811504528e-10
CERS5	sLGR5_male	0.357142857142857	0.198039079340797	0.279	0.201077689107155	sKITLG	0.572879975938942	1.60406393262904	2.53618342979613e-08
MDFI	sLGR5_male	0.435714285714286	0.265280578541131	0.507	0.268535570561353	coelEpi	0.572864897104758	1.31477189499453	3.3598557663681e-08
HILPDA	sLGR5_male	0.367857142857143	0.207704610249635	0.405	0.210763249437283	preGC_IIb	0.57276086090281	1.55701981604647	3.20457566014943e-08
TAGLN2	sLGR5_male	0.492857142857143	0.309575133857173	0.828	0.313075506445672	Sertoli_WFDC2	0.572360363706954	1.16131088288367	7.97790719919514e-09
IGFBP5	sLGR5_male	0.628571428571429	0.398372853070023	0.77	0.40276925175636	granulosa	0.57161748744999	0.909391457306802	9.05030281662662e-13
RP9	sLGR5_male	0.5	0.315416174118629	0.467	0.31894140918082	sKITLG	0.571373931673153	1.14274786334631	6.96410866866731e-09
GPC2	sLGR5_male	0.25	0.0988804672832209	0.194	0.101766591637678	Sertoli_WFDC2	0.57126835129364	2.28507340517456	3.44709390877815e-11
WLS	sLGR5_male	0.521428571428571	0.330853209095334	0.506	0.334492872246095	coelEpi	0.571037133625156	1.09513970832222	2.79779174986026e-09
MCM5	sLGR5_male	0.342857142857143	0.186148390237118	0.255	0.189141259122843	sKITLG	0.570946676681995	1.66526114032249	2.27366928761487e-08
RNF126	sLGR5_male	0.378571428571429	0.218482720255893	0.337	0.221540140508833	preGC_IIb	0.570564490620035	1.5071514846567	5.14339068426408e-08
ATF7IP2	sLGR5_male	0.378571428571429	0.218552256449482	0.4	0.221608348680172	Sertoli_WFDC2	0.570447953316184	1.50684365026916	5.23068781117818e-08
ENG	sLGR5_male	0.207142857142857	0.0609137055837563	0.286089238845144	0.0637064320305573	FetalLeydig-like	0.570361590596952	2.75346974770942	5.70244469689635e-14
RAB4A	sLGR5_male	0.403571428571429	0.240525693623531	0.388	0.243639588022645	sKITLG	0.569869187733685	1.41206524394187	6.47644593268532e-08
KCNG1	sLGR5_male	0.146428571428571	0.0180098741394896	0.067	0.0204624514016779	coelEpi	0.569484686294874	3.88916371128206	2.45372447764983e-21
SLC36A4	sLGR5_male	0.285714285714286	0.133370419303247	0.223	0.136279926335175	sLGR5_female	0.569441207637076	1.99304422672977	1.4511624475497e-09
CYP26B1	sLGR5_male	0.246428571428571	0.0964467005076142	0.272	0.0993110974694768	preGC_IIb	0.569126282305474	2.30949795718163	3.32271619400288e-11
SLC6A8	sLGR5_male	0.296428571428571	0.143870384535151	0.299	0.14678398472137	Sertoli_WFDC2	0.568785146308918	1.91879326465659	3.43958972121353e-09
DBN1	sLGR5_male	0.867857142857143	0.512551282942772	0.757	0.519337016574586	sLGR5_female	0.568621951807088	0.655202248995822	2.98291806546567e-33
TMEM259	sLGR5_male	0.553571428571429	0.354286906334747	0.459	0.358092899529364	preGC_IIb	0.568497281088044	1.0269628303526	6.70994671512647e-10
BAG6	sLGR5_male	0.589285714285714	0.377094777831861	0.495	0.381147261441921	preGC_IIb	0.568407006491546	0.964569465561412	5.29640370239882e-11
MYO1B	sLGR5_male	0.307142857142857	0.154300813573465	0.29	0.157219834936225	sKITLG	0.568248142227308	1.85011023050752	7.18059248993678e-09
PLOD2	sLGR5_male	0.589285714285714	0.377233850219039	0.573	0.381283677784599	preGC_IIb	0.568196133090017	0.96421161978912	5.47278540182879e-11
CTGF	sLGR5_male	0.367857142857143	0.210486057993185	0.432	0.21349157629084	coelEpi	0.568029514098638	1.54415790240407	6.36329988853515e-08
NSMCE3	sLGR5_male	0.439285714285714	0.271538835964119	0.465	0.274742514153196	preGC_IIb	0.567522409458131	1.29192093209981	6.7099546475187e-08
MOV10	sLGR5_male	0.446428571428571	0.277449412419164	0.43	0.280676625059682	sLGR5_female	0.56721074679781	1.27055207282709	6.23553603155426e-08
SESN1	sLGR5_male	0.360714285714286	0.204575481538141	0.671	0.207557465384353	Sertoli_WFDC2	0.567168038000609	1.57234703604129	6.31855169573654e-08
B4GALT1	sLGR5_male	0.378571428571429	0.220777414644322	0.455	0.223791010163018	Sertoli_WFDC2	0.566737575769926	1.49704265297716	8.87217280921431e-08
TM2D2	sLGR5_male	0.453571428571429	0.283429525067798	0.474	0.286678944137508	sLGR5_female	0.566688673458964	1.24939235093315	5.79742742040019e-08
SPATA5L1	sLGR5_male	0.271428571428571	0.121201585425214	0.228	0.124070663665507	sLGR5_female	0.56644537344261	2.08690400742014	7.44181006629253e-10
SMARCD1	sLGR5_male	0.439285714285714	0.272234197900007	0.39	0.275424595866585	sKITLG	0.566433180746622	1.28944138706548	7.84518306814518e-08
GORASP2	sLGR5_male	0.525	0.336763785550379	0.483	0.340358774981243	coelEpi	0.565821373526168	1.0777549971927	4.96202190599867e-09
DENND5B	sLGR5_male	0.364285714285714	0.208608580766289	0.361	0.21158174749335	preGC_I	0.565788113944934	1.55314384220178	8.24882930042484e-08
C16orf87	sLGR5_male	0.392857142857143	0.23385021903901	0.308	0.236886979060091	preGC_IIb	0.565781909469146	1.44017213319419	1.12585234406322e-07
METTL9	sLGR5_male	0.625	0.400180794103331	0.555	0.404474456039834	sKITLG	0.565729183716558	0.905166693946493	3.39055981705175e-12
CDC42EP4	sLGR5_male	0.421428571428571	0.258257422988666	0.36	0.261373712570766	granulosa	0.565474562600023	1.34180404684751	1.10298110894339e-07
PAPSS1	sLGR5_male	0.653571428571429	0.41652179959669	0.588	0.421049041675193	Sertoli_WFDC2	0.565343183316498	0.865005963544369	1.71772044496579e-13
GSTA4	sLGR5_male	0.703571428571429	0.442876016966831	0.791	0.447854853011391	Sertoli_WFDC2	0.565169140398983	0.803286087876726	2.45808625574047e-16
HNRNPLL	sLGR5_male	0.460714285714286	0.29003546345873	0.407	0.293295136757384	sKITLG	0.565101032389653	1.22657588425661	6.14799796937056e-08
CRTC1	sLGR5_male	0.328571428571429	0.176274250747514	0.28	0.17918286610736	preGC_IIb	0.564928758768752	1.71934839625272	3.37798629389479e-08
KANSL1	sLGR5_male	0.510714285714286	0.327376399415896	0.441	0.330877839165132	sLGR5_female	0.564853083536092	1.10600603769305	1.12332727860086e-08
DOK6	sLGR5_male	0.264285714285714	0.115151936582991	0.225	0.118000136416343	preGC_IIb	0.564796938875131	2.13706949844644	5.05840999240746e-10
DAP3	sLGR5_male	0.475	0.30130032682011	0.452	0.304617693199645	Sertoli_WFDC2	0.564631432930627	1.18869775353816	4.44076498353925e-08
CPOX	sLGR5_male	0.217857142857143	0.0721785689451359	0.113	0.0749607803014801	ovarianSurf	0.564422157584333	2.59079023153464	1.3095786603456e-12
GFRA2	sLGR5_male	0.175	0.0372018635699882	0.193	0.039833572061933	sPAX8e	0.564032910544257	3.22304520311004	1.24282952215087e-16
ARF6	sLGR5_male	0.453571428571429	0.285515610875461	0.389	0.288725189277675	preGC_I	0.56346268952858	1.24227994541734	9.02684677242927e-08
MXRA8	sLGR5_male	0.282142857142857	0.132883665948126	0.422	0.135734260964464	sPAX8e	0.563455161390566	1.99705626821973	2.956978641057e-09
GSK3B	sLGR5_male	0.425	0.262638203184758	0.397	0.265739035536457	Sertoli_WFDC2	0.563227221499731	1.32524052117584	1.44957411380055e-07
CHCHD3	sLGR5_male	0.585714285714286	0.378485501703637	0.618	0.38244321669736	sLGR5_female	0.562973981177118	0.961175089814592	1.63104646068759e-10
GTF2B	sLGR5_male	0.442857142857143	0.277379876225575	0.359	0.280540208717004	sLGR5_female	0.562888353556329	1.27103821770784	1.19622515836691e-07
BAZ1A	sLGR5_male	0.267857142857143	0.119463180585495	0.246	0.122297251210695	Sertoli_WFDC2	0.562848405089232	2.10130071233313	9.89878207921707e-10
PRKRIP1	sLGR5_male	0.403571428571429	0.244976010013212	0.378	0.248004910988336	preGC_IIb	0.562702359151504	1.39430673064089	1.75409799358611e-07
SMU1	sLGR5_male	0.478571428571429	0.305402962241847	0.422	0.308710183479981	sKITLG	0.56249005787786	1.17535235974478	5.35626621061257e-08
TOMM34	sLGR5_male	0.546428571428571	0.353939225366803	0.577	0.357615442329991	Sertoli_WFDC2	0.561890889874846	1.02829705336573	2.74275883079979e-09
BTBD3	sLGR5_male	0.321428571428571	0.171476253389889	0.412	0.174340085942296	sLGR5_female	0.561454511927413	1.74674737044084	4.23150788509273e-08
EVL	sLGR5_male	0.396428571428571	0.239621723106877	0.41	0.242616465452561	preGC_I	0.561451246260246	1.41627341398981	2.08508514506615e-07
TAF9	sLGR5_male	0.567857142857143	0.368402753633266	0.524	0.372211990996521	preGC_IIb	0.561208511719904	0.988291718752033	7.81146171771224e-10
GARS	sLGR5_male	0.392857142857143	0.236840275363327	0.355	0.239819930427665	sKITLG	0.560947721373756	1.4278669271332	2.21217861355188e-07
KLHL24	sLGR5_male	0.525	0.340379667616995	0.45	0.343905599890867	sLGR5_female	0.56037874104996	1.0673880781904	1.08886278214616e-08
CCDC130	sLGR5_male	0.35	0.198943049857451	0.282	0.201827978991883	sLGR5_female	0.560118836738319	1.60033953353805	1.35067015555704e-07
FBN3	sLGR5_male	0.317857142857143	0.168833878033516	0.386	0.171679967260078	sLGR5_female	0.560103442790937	1.76212319080295	4.42932953074768e-08
PEA15	sLGR5_male	0.460714285714286	0.293373200750991	0.47	0.296569128981652	Sertoli_WFDC2	0.559986667724765	1.21547493769716	1.22962592724855e-07
LYPD1	sLGR5_male	0.471428571428571	0.301717543981642	0.841	0.30495873405634	sPAX8m	0.559858581717734	1.18757880970428	9.49544872109077e-08
SLC7A8	sLGR5_male	0.317857142857143	0.168972950420694	0.302	0.171816383602756	preGC_IIc	0.559850974832583	1.76132890958565	4.57832806283498e-08
PSMD1	sLGR5_male	0.507142857142857	0.328210833738961	0.465	0.33162812904986	sLGR5_female	0.559754380038685	1.1037410310622	2.76376057061755e-08
ATP6V1H	sLGR5_male	0.385714285714286	0.231346916069814	0.324	0.234295068549212	sLGR5_female	0.559738535637271	1.45117398128181	2.52039261046927e-07
EPS15L1	sLGR5_male	0.321428571428571	0.17258883248731	0.237	0.175431416683719	preGC_I	0.559448710900957	1.74050710058075	5.71514842757807e-08
GGA1	sLGR5_male	0.307142857142857	0.158959738543912	0.213	0.161789782415933	preGC_I	0.559447637930628	1.82145742582065	2.88204979128862e-08
APEH	sLGR5_male	0.417857142857143	0.25916139350532	0.382	0.262192210626833	sLGR5_female	0.559375920193663	1.33867741584808	2.62678103224962e-07
PIGC	sLGR5_male	0.464285714285714	0.29678047423684	0.462	0.299979537548598	sLGR5_female	0.559019042596652	1.20404101482356	1.2824884803878e-07
IFT52	sLGR5_male	0.460714285714286	0.294277171267645	0.388	0.297455835209058	Sertoli_WFDC2	0.558611242265426	1.2124895180955	1.4778622556106e-07
TYRO3	sLGR5_male	0.496428571428571	0.321257214380085	0.616	0.324602687401951	granulosa	0.558558267605659	1.12515334481715	4.97714295828833e-08
ELP6	sLGR5_male	0.485714285714286	0.313469160698143	0.476	0.316758747697974	sKITLG	0.558384352372806	1.14961484312048	7.49060889060088e-08
KCTD12	sLGR5_male	0.732142857142857	0.461442180655031	0.826	0.466612100129596	granulosa	0.55808100846907	0.762256987177266	9.51948681210118e-18
KIAA1191	sLGR5_male	0.425	0.266254085251373	0.378	0.269285860446081	sLGR5_female	0.557592258788579	1.31198178538489	3.13837113593687e-07
IDH1	sLGR5_male	0.525	0.342257144843891	0.556	0.345747220517018	Sertoli_WFDC2	0.557574857419605	1.06204734746592	1.62231599831978e-08
AC090204.1	sLGR5_male	0.264285714285714	0.11862874626243	0.242	0.121410544983289	sLGR5_female	0.557266921986635	2.10857754265213	1.80640399607559e-09
SERPING1	sLGR5_male	0.675	0.433905847993881	0.854	0.438510333537958	coelEpi	0.55645103371269	0.824371901796578	5.99142507717244e-14
TRIM24	sLGR5_male	0.392857142857143	0.239760795494055	0.362	0.2426846736239	sLGR5_female	0.55628269624419	1.41599231771248	4.15227794945361e-07
HNRNPUL1	sLGR5_male	0.689285714285714	0.441763437869411	0.563	0.446490689584612	sKITLG	0.555796389497456	0.806336730877139	1.03056926686657e-14
GID8	sLGR5_male	0.435714285714286	0.276336833321744	0.372	0.279380669804243	ovarianSurf	0.555614151231101	1.27518001921892	3.57181641443065e-07
PSMA3	sLGR5_male	0.660714285714286	0.426882692441416	0.575	0.431348475547371	sKITLG	0.555554331098739	0.840838987608902	3.88857251022635e-13
DPH3	sLGR5_male	0.328571428571429	0.181628537653849	0.296	0.184434895300457	Sertoli_WFDC2	0.555436446026206	1.69045874877541	1.36022600686546e-07
SMC5	sLGR5_male	0.492857142857143	0.320839997218552	0.59	0.324125230202578	sKITLG	0.555265338698636	1.12662532489578	8.91269344724487e-08
HYOU1	sLGR5_male	0.328571428571429	0.181837146234615	0.293	0.184639519814474	sLGR5_female	0.555072108792159	1.68934989632396	1.43026135002944e-07
CACHD1	sLGR5_male	0.346428571428571	0.198664905083096	0.409	0.201486938135189	sKITLG	0.554989214700547	1.60203072284694	2.5708897943009e-07
XRN2	sLGR5_male	0.714285714285714	0.454836242264098	0.647	0.459791282995703	sKITLG	0.554987589346304	0.776982625084826	3.07794310033042e-16
FKBP10	sLGR5_male	0.653571428571429	0.423475418955566	0.642	0.427869858809085	sKITLG	0.55484044358928	0.848936197841521	9.99803812535402e-13
GLUD1	sLGR5_male	0.371428571428571	0.222168138516098	0.316	0.225018757247118	Sertoli_WFDC2	0.554012276892168	1.49157151470968	4.76108978132719e-07
ULK1	sLGR5_male	0.242857142857143	0.099436756831931	0.156	0.102175840665712	Sertoli_WFDC2	0.553971719594838	2.2810600218611	3.28747255225657e-10
NUDT11	sLGR5_male	0.392857142857143	0.241290591753007	0.632	0.244185253393357	Sertoli_WFDC2	0.553861041856382	1.40982810654352	5.82965955428259e-07
OCIAD2	sLGR5_male	0.7	0.448508448647521	0.643	0.453311506718505	sLGR5_female	0.553823015916607	0.791175737023725	3.27125831800047e-15
DDX56	sLGR5_male	0.417857142857143	0.262777275571935	0.407	0.265739035536457	sKITLG	0.553761217777047	1.32524052117584	5.60094768445306e-07
RTCA	sLGR5_male	0.307142857142857	0.162088867255406	0.255	0.164859150126185	sKITLG	0.553675311607826	1.80266380523478	6.86026741305044e-08
SURF4	sLGR5_male	0.489285714285714	0.319310200959599	0.459	0.322556442261783	coelEpi	0.553615602254754	1.13147714329439	1.2574934969017e-07
RCBTB2	sLGR5_male	0.35	0.202837076698422	0.344	0.205647636586863	sLGR5_female	0.553556876871942	1.58159107677698	3.4120626866637e-07
SLC3A2	sLGR5_male	0.839285714285714	0.510812878103053	0.717	0.517086146920401	Sertoli_WFDC2	0.553547359365217	0.659545789881961	7.77837669012743e-28
TSN	sLGR5_male	0.457142857142857	0.295042069397121	0.432	0.298137916922447	sLGR5_female	0.553233870205691	1.21019909107495	3.31300377388009e-07
ETNK1	sLGR5_male	0.442857142857143	0.283707669842153	0.411	0.286747152308847	sLGR5_female	0.553196972459773	1.24915445394142	4.41257641007885e-07
MKRN1	sLGR5_male	0.560714285714286	0.369376260343509	0.561	0.373030489052589	preGC_I	0.552917622310229	0.986095122591492	4.18619219117805e-09
TMEM26	sLGR5_male	0.289285714285714	0.145191572213337	0.361	0.147943523634131	sLGR5_female	0.552803209585795	1.91092467511139	2.76610822062268e-08
RABGGTB	sLGR5_male	0.571428571428571	0.376538488283151	0.572	0.380260555214515	sKITLG	0.552513479777111	0.966898589609945	2.19347495523154e-09
TENM4	sLGR5_male	0.239285714285714	0.0966553090883805	0.207	0.0993793056408158	granulosa	0.552465580152804	2.30881137974306	2.78379653666069e-10
CTNNBL1	sLGR5_male	0.325	0.179959669007719	0.256	0.182729691016984	Sertoli_WFDC2	0.552417877827938	1.69974731639366	1.83812466329856e-07
TUBG2	sLGR5_male	0.314285714285714	0.16973784855017	0.271	0.172498465316145	sLGR5_female	0.552315323770037	1.7573669392683	1.18797342745969e-07
TAC1	sLGR5_female	0.895	0.0794231754629968	0.542857142857143	0.135052179251074	sLGR5_male	1.79187418571347	2.00209406224968	0
ABCA9-AS1	sLGR5_female	0.382	0.00695410292072323	0.142857142857143	0.0325352977286679	sLGR5_male	1.30851414350907	3.42542969504992	0
BX470209.1	sLGR5_female	0.641	0.100139082058414	0.564285714285714	0.137030216219903	sLGR5_male	1.27402199934005	1.98755382112333	0
HRASLS	sLGR5_female	0.723	0.133884781494766	0.510714285714286	0.17406725325694	sLGR5_male	1.2640306904854	1.74831354147358	0
LRRN3	sLGR5_female	0.768	0.160529975843642	0.48	0.201964395334561	coelEpi	1.22854184281857	1.59966385783667	0
SYNDIG1	sLGR5_female	0.465	0.047361100944294	0.396428571428571	0.0758474865288862	sLGR5_male	1.1992492806744	2.57903071112774	4.94858659449247e-277
CPA2	sLGR5_female	0.364	0.0135422004245663	0.114285714285714	0.0374462860650706	sLGR5_male	1.19568457897206	3.28484774442873	2.64735169965829e-305
SLC1A3	sLGR5_female	0.58	0.105848766561745	0.389	0.138189755132665	preGC_I	1.14789395065519	1.97912750112964	7.17310576501225e-257
NRXN3	sLGR5_female	0.546	0.0972842398067491	0.321	0.127890321260487	preGC_I	1.12289390715343	2.05658224753375	4.97304223140321e-241
CPVL	sLGR5_female	0.612	0.145889759168436	0.471428571428571	0.177682286337903	sLGR5_male	1.05738803783149	1.7277582317508	1.73647080338326e-222
CCKBR	sLGR5_female	0.391	0.0541688016982651	0.18	0.0771434417843258	preGC_I	1.00177668554046	2.56208870982214	6.45173020551667e-189
RASL11B	sLGR5_female	0.705	0.21096552228973	0.657142857142857	0.244662710592729	sLGR5_male	0.992551669426217	1.40787470840598	3.31040756231789e-221
ANOS1	sLGR5_female	0.504	0.116975331234902	0.304	0.143373576154423	preGC_I	0.97892002378869	1.94230163450137	2.64341589009543e-174
CAB39L	sLGR5_female	0.581	0.1627992094283	0.392	0.191323920605689	preGC_I	0.960850460797233	1.65378736798147	6.53304099151383e-176
PHLDA1	sLGR5_female	0.743	0.242075982724544	0.425	0.276243093922652	sPAX8e	0.955850201197396	1.28647402583768	2.6015332805759e-220
STRA6	sLGR5_female	0.604	0.177659029353634	0.785714285714286	0.206738967328286	sLGR5_male	0.952084178563799	1.57629830888046	1.31093463066351e-176
REG3G	sLGR5_female	0.451	0.0983822560573896	0.632142857142857	0.122433667553373	sLGR5_male	0.947183834142164	2.10018588501589	9.94360723232002e-160
GRID2	sLGR5_female	0.341	0.0436278456921162	0.542857142857143	0.063911056544574	sLGR5_male	0.937839650161646	2.75026290369984	2.01876747064636e-169
PLAC1	sLGR5_female	0.655	0.210379913622722	0.839285714285714	0.240706636655071	sLGR5_male	0.932835517282261	1.42417636226299	6.50290834500701e-181
CYP4X1	sLGR5_female	0.313	0.0364541395212649	0.091	0.0553168269558693	sPAX8e	0.906034255260553	2.89467813182285	1.67227095681016e-162
SORD	sLGR5_female	0.63	0.209794304955713	0.664285714285714	0.238455767000887	sLGR5_male	0.903150012972588	1.43357144916284	8.65725357358046e-163
TSPAN8	sLGR5_female	0.254	0.0131761950076861	0.239285714285714	0.0296023463610941	sLGR5_male	0.894055019566816	3.51990165183786	1.07963915135634e-185
BIK	sLGR5_female	0.33	0.0475807041944221	0.229	0.0668440079121479	sPAX8e	0.892779892710304	2.70539361427365	3.68998623184694e-151
TUBB3	sLGR5_female	0.615	0.208476685454945	0.682142857142857	0.236204897346702	sLGR5_male	0.887479219544543	1.44305564153584	2.72720033654432e-153
TMEM59L	sLGR5_female	0.515	0.156284313007833	0.492857142857143	0.180751654048155	sLGR5_male	0.880975102483368	1.710631266958	1.67235586212231e-135
LYPD1	sLGR5_female	0.719	0.274650464826879	0.841	0.30495873405634	sPAX8m	0.85386916417738	1.18757880970428	1.67120237566985e-169
USP46	sLGR5_female	0.55	0.187321572359271	0.39	0.212059204692722	preGC_I	0.852989376733731	1.55088977587951	1.02984858403325e-128
CHRNA7	sLGR5_female	0.31	0.0458970792767733	0.232142857142857	0.063911056544574	sLGR5_male	0.852581500146951	2.75026290369984	3.6005474332152e-138
CRABP2	sLGR5_female	0.628	0.230729814801259	0.792857142857143	0.257826887661142	sLGR5_male	0.851233211519868	1.35546689732463	3.85715278800963e-142
CCDC73	sLGR5_female	0.738	0.291047507503111	0.707142857142857	0.321533319691699	sLGR5_male	0.837374727602335	1.13465410244219	5.9043542594083e-170
ZPBP	sLGR5_female	0.447	0.134836395578655	0.514285714285714	0.156128504194803	sLGR5_male	0.830112912095607	1.8570758659857	9.33028049084923e-113
LY6H	sLGR5_female	0.482	0.158114340092233	0.573	0.180205988677444	coelEpi	0.825981565812589	1.71365470085599	2.92713725793754e-112
C3orf58	sLGR5_female	0.727	0.293316741087768	0.635	0.322897483118478	preGC_I	0.821815627793372	1.13042039586434	8.85616978494057e-160
FAM184A	sLGR5_female	0.317	0.058121660200571	0.26	0.0757792783575472	preGC_I	0.817837935626667	2.57993039629863	6.48048647981747e-121
EPSTI1	sLGR5_female	0.462	0.149403411170485	0.402	0.170725052861333	preGC_I	0.816677813261999	1.76770089450649	5.45037734246829e-108
PRSS23	sLGR5_female	0.566	0.213015152624259	0.474	0.237091603574108	preGC_I	0.814648723946988	1.43930869955298	1.01274782672301e-116
MME	sLGR5_female	0.583	0.223116902130152	0.685714285714286	0.247663870131642	sLGR5_male	0.81368308086745	1.39568281452393	4.37755819961081e-119
NPY1R	sLGR5_female	0.316	0.0590732742844594	0.143	0.0765977764136144	preGC_I	0.811863165059144	2.56918723119982	1.34919181741826e-118
TMSB15A	sLGR5_female	0.518	0.187101969109143	0.653571428571429	0.20967191869586	sLGR5_male	0.809225433632977	1.56221126183972	8.58250606097504e-109
NPNT	sLGR5_female	0.732	0.304004099260669	0.75	0.333196916990655	preGC_I	0.804483826909731	1.09902162146138	7.23361265275162e-155
SETDB2	sLGR5_female	0.558	0.215357587292292	0.539285714285714	0.238728599686242	sLGR5_male	0.799294789661104	1.43242793846076	5.67498856314835e-110
AP002884.1	sLGR5_female	0.452	0.151306639338262	0.5	0.171816383602756	sLGR5_male	0.796120667132716	1.76132890958565	3.2741849262346e-100
GLIPR2	sLGR5_female	0.466	0.160822780177147	0.482142857142857	0.181638360275561	sLGR5_male	0.794873721657939	1.70573760012433	3.73704291602316e-100
NNAT	sLGR5_female	0.433	0.139521264914721	0.407142857142857	0.159538912761749	sLGR5_male	0.794757392580319	1.83546741935409	1.36582914511955e-99
STC1	sLGR5_female	0.356	0.0909157455530342	0.278	0.108996657799604	preGC_I	0.789051949221888	2.21643805961204	3.03267308261747e-102
DMRT1	sLGR5_female	0.371	0.103140326476832	0.425	0.121410544983289	sLGR5_male	0.782282268323942	2.10857754265213	5.69997702167511e-98
AC112487.1	sLGR5_female	0.374	0.106434375228753	0.535714285714286	0.124684537207557	sLGR5_male	0.778656194287639	2.08196843392417	2.48553894804398e-96
CEMIP2	sLGR5_female	0.631	0.266451943488764	0.53	0.291317099788555	Sertoli_WFDC2	0.77823937942608	1.2333429150968	1.13887807516031e-115
PTBP3	sLGR5_female	0.533	0.212795549374131	0.65	0.234636109405907	sLGR5_male	0.772700459159247	1.44971943557082	2.29755738436462e-97
FHIT	sLGR5_female	0.606	0.25803381890052	0.385714285714286	0.281767955801105	sLGR5_male	0.767602867516149	1.2666713985415	1.05417101309999e-106
SLMAP	sLGR5_female	0.615	0.26615913915526	0.571428571428571	0.289952936361776	sLGR5_male	0.761392544411377	1.23803665757947	2.78073611698076e-106
SLC16A10	sLGR5_female	0.383	0.120049776736696	0.401	0.137985130618648	preGC_I	0.758573380579109	1.98060934877052	3.63887943768064e-88
PCSK1N	sLGR5_female	0.473	0.183954322523973	0.409	0.203669599618034	preGC_I	0.752664186307908	1.59125620783913	1.48304525494143e-85
PHLDB2	sLGR5_female	0.382	0.121953004904473	0.338	0.139690334902121	preGC_I	0.751900990315527	1.96832719977887	8.05832157725973e-86
MCTP2	sLGR5_female	0.299	0.0661737793719347	0.192	0.0820544301207285	preGC_I	0.747611368519112	2.50037246996359	5.61383540941445e-96
EPCAM	sLGR5_female	0.555	0.239294341556255	0.641	0.260828047200055	Sertoli_WFDC2	0.74586112103067	1.34389391176697	8.30793399085602e-91
TDGF1	sLGR5_female	0.416	0.149549813337237	0.34	0.16772389332242	sKITLG	0.742741435788382	1.78543614372207	3.40061424987109e-81
COL14A1	sLGR5_female	0.422	0.156064709757704	0.396	0.174203669599618	preGC_I	0.737457723023919	1.74753014934578	2.6220002659948e-79
APOBEC3H	sLGR5_female	0.203	0.0135422004245663	0.203571428571429	0.0264647704795034	sLGR5_male	0.737283991801943	3.63194084631499	6.90413785361234e-133
GRIK2	sLGR5_female	0.307	0.0756899202108191	0.253571428571429	0.0914671577655003	sLGR5_male	0.734275017915572	2.39177530265659	6.15156064995251e-89
MMD	sLGR5_female	0.339	0.0996998755581583	0.582142857142857	0.116022099447514	sLGR5_male	0.730197387210875	2.1539745935424	3.84922309732094e-82
LUZP2	sLGR5_female	0.205	0.0161774394261035	0.117857142857143	0.0290566809903826	sLGR5_male	0.725393902132123	3.53850683966889	7.52138963705126e-125
CCBE1	sLGR5_female	0.329	0.09486860405534	0.478	0.110838278425755	granulosa	0.723695736996386	2.19968309117443	3.87946580730177e-81
IDH2	sLGR5_female	0.472	0.19749652294854	0.442857142857143	0.216219903144397	sLGR5_male	0.722848798599595	1.53145931906694	1.83541256756748e-75
MAPK13	sLGR5_female	0.522	0.230510211551131	0.464285714285714	0.250392196985199	sLGR5_male	0.722827390874427	1.38472680244143	3.09913705124183e-79
TRPM3	sLGR5_female	0.29	0.0682966107898397	0.173	0.083418593547507	preGC_I	0.720326374572817	2.48388405025109	3.31498285364362e-87
DPP10	sLGR5_female	0.765	0.362857770295	0.723	0.390287156401337	sKITLG	0.71976747193108	0.940872512328209	5.10489278564527e-135
BTBD3	sLGR5_female	0.412	0.156943122758217	0.338	0.174340085942296	preGC_I	0.719659916621626	1.74674737044084	2.3471380300743e-73
ACTC1	sLGR5_female	0.194	0.0121513798404216	0.317857142857143	0.0245549416820135	sLGR5_male	0.719127377970693	3.70684215448811	7.18230924015488e-130
IFI6	sLGR5_female	0.843	0.39609106214772	0.784	0.426573903553646	preGC_I	0.718210413196963	0.851969647920478	2.17140156270251e-171
KCND2	sLGR5_female	0.235	0.0335260961862236	0.103	0.047268262737876	preGC_I	0.717200303885865	3.05191618674836	5.20158469856206e-104
ISLR	sLGR5_female	0.398	0.149769416587366	0.446	0.166700770752336	coelEpi	0.713038836527418	1.79155486564678	1.70945691523785e-71
HTR2C	sLGR5_female	0.207	0.0196178903447771	0.135714285714286	0.03239888138599	sLGR5_male	0.70993369605405	3.42963138190362	1.91056137777069e-115
ADRA2A	sLGR5_female	0.358	0.121806602737721	0.323	0.137916922447309	preGC_I	0.709235155516109	1.98110378635785	1.39668003542619e-72
OSR1	sLGR5_female	0.307	0.0846936534660713	0.44	0.0998567628401883	preGC_I	0.707333676865021	2.30401849141701	1.02723812535658e-78
RALGPS2	sLGR5_female	0.575	0.272088426908718	0.453	0.292749471386672	sPAX8e	0.706351897257913	1.22843808218768	1.76817714979332e-80
FLRT3	sLGR5_female	0.558	0.262425883903082	0.536	0.282586453857172	coelEpi	0.705184075074361	1.26377074386086	1.1056958599498e-77
ELMO1	sLGR5_female	0.41	0.162506405094795	0.332	0.179387490621376	granulosa	0.704464894914246	1.71820706076645	2.28167548181671e-68
MPP6	sLGR5_female	0.538	0.253934558231462	0.485714285714286	0.273310142555078	sLGR5_male	0.697865664512541	1.29714807530212	8.33389617824348e-73
AQP3	sLGR5_female	0.38	0.144352536417539	0.359	0.160425618989155	sPAX8e	0.695371453229504	1.82992487691975	2.24513446096001e-66
ADAMTS19	sLGR5_female	0.327	0.104311543810848	0.375	0.119500716185799	sLGR5_male	0.69468956302251	2.12443291444193	6.05379079385686e-71
CRMP1	sLGR5_female	0.527	0.248810482395139	0.592857142857143	0.267785280676625	sLGR5_male	0.694359290450679	1.31756981110186	1.60669131913567e-70
PLEKHH2	sLGR5_female	0.53	0.250860112729668	0.575	0.269899733988132	sLGR5_male	0.694143514613005	1.30970474455284	9.28026332732878e-71
MLLT11	sLGR5_female	0.532	0.252543737647317	0.717857142857143	0.271604938271605	sLGR5_male	0.693412365099113	1.30340670131412	9.59805183072585e-71
FUT8	sLGR5_female	0.313	0.0942829953883318	0.321428571428571	0.109201282313621	sLGR5_male	0.693158054030705	2.21456247294155	1.81831002177509e-72
DUBR	sLGR5_female	0.462	0.206793060537296	0.374	0.224200259191051	Sertoli_WFDC2	0.690789612870609	1.49521561227405	1.10369004242237e-64
TMEM26	sLGR5_female	0.361	0.132347558743869	0.289285714285714	0.147943523634131	sLGR5_male	0.689843807715212	1.91092467511139	9.3996874046268e-66
CSMD3	sLGR5_female	0.27	0.0641973501207818	0.225	0.0782347725257486	sLGR5_male	0.687971088578401	2.54804106880889	1.35884089186464e-79
IGF2BP2	sLGR5_female	0.582	0.286875045750677	0.617857142857143	0.307004979196508	sLGR5_male	0.687278743959583	1.18089131264533	2.34142227335638e-75
EPHA4	sLGR5_female	0.311	0.0961130224727326	0.221428571428571	0.110770070254416	sLGR5_male	0.684292884882375	2.20029866521664	1.25105048221455e-69
HTR1E	sLGR5_female	0.232	0.0398213893565625	0.253571428571429	0.0529295409590069	sLGR5_male	0.681800130455171	2.93879366575505	1.25496889357711e-89
SLC35F2	sLGR5_female	0.437	0.194056072029866	0.553571428571429	0.210626833094605	sLGR5_male	0.680700599084802	1.5576672747936	8.5751134446177e-61
FBN3	sLGR5_female	0.386	0.155991508674328	0.317857142857143	0.171679967260078	sLGR5_male	0.680179551649938	1.76212319080295	3.72785983391516e-61
MEIS2	sLGR5_female	0.544	0.267915965156284	0.638	0.286747152308847	coelEpi	0.679540022944134	1.24915445394142	9.5955207361213e-68
CRLF1	sLGR5_female	0.238	0.0444330576092526	0.317857142857143	0.0576359047813928	sLGR5_male	0.6791590749423	2.85360955858109	3.60127984337277e-86
BCAT1	sLGR5_female	0.54	0.266232340238636	0.525	0.284905531682696	granulosa	0.678022715578188	1.25559762144109	8.44862283023981e-67
RFK	sLGR5_female	0.349	0.128321499158188	0.317	0.143373576154423	preGC_I	0.677863270440977	1.94230163450137	9.22026723637216e-63
AC087463.4	sLGR5_female	0.193	0.0179342654271283	0.182142857142857	0.0298751790464498	sLGR5_male	0.677570364183431	3.51072727556182	3.45173308671571e-108
TESC	sLGR5_female	0.426	0.188785594026792	0.388	0.204965554873474	preGC_I	0.675173082400775	1.58491333896896	6.18633525387348e-59
GABRA2	sLGR5_female	0.302	0.092672571554059	0.396	0.106950412659437	ovarianSurf	0.675087775478429	2.23538998502791	7.22959329346125e-68
IRS1	sLGR5_female	0.38	0.154747090256936	0.343	0.170111179319282	preGC_I	0.673095162685347	1.77130305969828	3.91617770328945e-59
AGL	sLGR5_female	0.425	0.1893712026938	0.271428571428571	0.205443012072846	sLGR5_male	0.672599303732854	1.58258659701848	3.91481249698703e-58
ETV1	sLGR5_female	0.286	0.081985213381158	0.208	0.0959006889025305	sKITLG	0.670510444480349	2.34444211356765	2.98059936659138e-69
PSMD9	sLGR5_female	0.768	0.392431007978918	0.71	0.41804788213628	sKITLG	0.669818344283545	0.872159302452533	1.3491738373975e-117
RPRM	sLGR5_female	0.734	0.377351584803455	0.678	0.401677921014938	preGC_I	0.669484851997371	0.912104702993694	2.31129189131137e-105
CYTL1	sLGR5_female	0.425	0.191933240611961	0.638	0.207830298069709	coelEpi	0.667689197954836	1.57103340695256	1.2639874149853e-56
GINS2	sLGR5_female	0.284	0.0816924090476539	0.342857142857143	0.095491439874497	sLGR5_male	0.667036102375116	2.34871867033491	2.07310944554423e-68
MAN2A1	sLGR5_female	0.355	0.138130444330576	0.258	0.152922720141873	Sertoli_WFDC2	0.666627016718687	1.87782258230616	1.40188394422907e-58
REPS2	sLGR5_female	0.365	0.146109362418564	0.284	0.161039492531205	preGC_I	0.666528561831254	1.82610564885275	7.45069203065292e-58
MEF2C	sLGR5_female	0.429	0.196471707781275	0.384	0.212332037378078	sKITLG	0.664780122648066	1.54960401549666	8.91376547014397e-56
HIST1H2AC	sLGR5_female	0.647	0.337456994363517	0.634	0.358570356728736	sPAX8e	0.663582859171874	1.02563038511882	8.58041145945351e-80
SYCN	sLGR5_female	0.372	0.153356269672791	0.532	0.168269558693131	Sertoli_WFDC2	0.662973961820114	1.78218806940891	2.51504745163069e-56
LAYN	sLGR5_female	0.236	0.04743430202767	0.107142857142857	0.0602960234636109	sLGR5_male	0.662803433098947	2.80848912330062	3.75161846744464e-80
TMEM163	sLGR5_female	0.232	0.0449454651928849	0.217	0.0577041129527317	Sertoli_WFDC2	0.661763023709034	2.85242682633204	3.38938664272648e-81
NPFFR2	sLGR5_female	0.182	0.015152624258839	0.108	0.0265329786508424	preGC_I	0.660544765302207	3.62936684231982	2.7300771849441e-107
HSD17B14	sLGR5_female	0.329	0.120196178903448	0.264285714285714	0.134438305709024	sLGR5_male	0.660187810120444	2.00664987878554	6.23593738733875e-59
GFRA1	sLGR5_female	0.258	0.064709757704414	0.347	0.077893731669054	coelEpi	0.658521727296356	2.55240979572231	1.70746667416006e-71
KCTD8	sLGR5_female	0.281	0.0825708220481663	0.357142857142857	0.0961053134165473	sLGR5_male	0.658189299405123	2.34231067403958	7.59200630386584e-66
FIRRE	sLGR5_female	0.269	0.07327428445941	0.325	0.0866243776004365	sLGR5_male	0.658020807744634	2.44617400648563	1.74043961267817e-68
AC008124.1	sLGR5_female	0.356	0.143254520166898	0.279	0.157765500306937	preGC_I	0.65740580643963	1.84664552370683	1.47568849729127e-55
ARL4D	sLGR5_female	0.71	0.373911133884781	0.68	0.396835140849874	preGC_I	0.656206386287013	0.924234346883118	2.79997458372819e-93
PXDN	sLGR5_female	0.459	0.225386135714809	0.478571428571429	0.241320510197122	sLGR5_male	0.652527853849307	1.42162931121853	6.84019571093955e-53
IGF2BP1	sLGR5_female	0.332	0.12605226557353	0.5	0.140099583930155	sLGR5_male	0.652513396089321	1.96540179544976	4.25373393790188e-56
XIST	sLGR5_female	0.579	0.305614523094942	0.612	0.324261646545256	preGC_IIb	0.652072427512495	1.12620453801813	6.70498868989147e-64
CAPN5	sLGR5_female	0.344	0.136520020496303	0.264285714285714	0.150671850487688	sLGR5_male	0.651071937986243	1.89265098251815	1.68252157403439e-54
BCL2	sLGR5_female	0.455	0.224654124881048	0.428	0.240365595798377	sKITLG	0.648645360491398	1.42559419888219	1.35066147411842e-51
GPR37	sLGR5_female	0.256	0.0664665837054388	0.435714285714286	0.0793943114385103	sLGR5_male	0.648532110757602	2.53332855764688	2.69047109379658e-68
SGCD	sLGR5_female	0.264	0.0726886757924017	0.238	0.0857376713730305	sPAX8e	0.648506226019877	2.45646297734802	3.27416342948762e-66
FGFR1	sLGR5_female	0.731	0.389429763560501	0.710714285714286	0.412727644771844	sLGR5_male	0.646911139659954	0.884967359315943	1.71587509119477e-96
C15orf48	sLGR5_female	0.44	0.21484517970866	0.69	0.230202578268877	preGC_IIc	0.646270056357919	1.46879558263163	1.91428162604967e-50
IMMP2L	sLGR5_female	0.452	0.224654124881048	0.467857142857143	0.24016097128436	sLGR5_male	0.644753531786012	1.42644586678321	2.38313476183491e-50
SP3	sLGR5_female	0.444	0.218724837127589	0.407142857142857	0.234090444035195	sLGR5_male	0.644709190046703	1.45204772533041	4.32408711060713e-50
HMGA2	sLGR5_female	0.321	0.121220994070712	0.546428571428571	0.134847554737058	sLGR5_male	0.643158926448415	2.00361036276765	2.6228554419325e-54
ARHGAP29	sLGR5_female	0.534	0.283288192665251	0.667	0.300388786576632	sPAX8e	0.642229885443101	1.20267768809569	2.45679686007658e-55
ZNF704	sLGR5_female	0.31	0.112729668399092	0.264285714285714	0.126185116977014	sLGR5_male	0.641701633038427	2.07000526786589	3.09647879607305e-55
DACT1	sLGR5_female	0.304	0.108923212063539	0.465	0.122229043039356	preGC_I	0.63896501209063	2.10185859240339	3.47727287457931e-55
KAZN	sLGR5_female	0.368	0.162286801844667	0.571428571428571	0.176318122911125	sLGR5_male	0.63865126683043	1.73546539899574	4.87779437344397e-49
MEG3	sLGR5_female	0.79	0.421125832662323	0.910714285714286	0.446286065070595	sLGR5_male	0.637368153544135	0.806795131068526	1.64644723235925e-114
GALNTL6	sLGR5_female	0.228	0.0489715247785667	0.217857142857143	0.061182729691017	sLGR5_male	0.637006993844519	2.79389032387947	1.29188679167476e-72
FBLN1	sLGR5_female	0.392	0.183075909523461	0.525	0.197326239683514	sLGR5_male	0.636175577337155	1.62289688096213	1.90806164048918e-47
CWC27	sLGR5_female	0.604	0.330502891442793	0.533	0.349157629083964	preGC_I	0.635548006886332	1.05223179948068	8.99688736660671e-63
SFXN1	sLGR5_female	0.687	0.375667959885806	0.653571428571429	0.396903349021213	sLGR5_male	0.634830924640456	0.924062481281595	7.4698647996243e-80
LINC00665	sLGR5_female	0.532	0.286728643583925	0.535714285714286	0.303458154286884	sLGR5_male	0.634416147330343	1.19251155513222	7.33999773090834e-53
LIMD2	sLGR5_female	0.328	0.131176341409853	0.442857142857143	0.144601323238524	sLGR5_male	0.634278140393284	1.93377481827221	1.05895561289875e-50
IFI44L	sLGR5_female	0.303	0.110314032647683	0.417	0.123456790123457	preGC_I	0.633834810688553	2.09186406167839	1.2079356801056e-53
APOBEC3C	sLGR5_female	0.465	0.2406851621404	0.603571428571429	0.255985267034991	sLGR5_male	0.633625454863508	1.36263538680324	1.13846927662118e-47
LMO4	sLGR5_female	0.467	0.242441988141424	0.675	0.257758679489803	sLGR5_male	0.633126602368958	1.35573148258878	1.26377864987521e-47
GFRA3	sLGR5_female	0.187	0.0226923358465705	0.532142857142857	0.0338994611554464	sLGR5_male	0.632874601890386	3.38435615984164	4.05259971496438e-90
SUCO	sLGR5_female	0.629	0.348071151453042	0.59	0.36723279448878	sPAX8e	0.630106608892018	1.0017593146137	1.50952579694536e-65
ARL4A	sLGR5_female	0.77	0.417246175243394	0.691	0.441306868562854	sKITLG	0.629871394801355	0.818014798443318	5.7628645283075e-104
AMOT	sLGR5_female	0.303	0.11221726081546	0.578571428571429	0.125230202578269	sLGR5_male	0.629513289271622	2.07760161475783	3.07113674695398e-52
CLCN5	sLGR5_female	0.552	0.303052485176781	0.572	0.320032739922243	granulosa	0.628911250843024	1.1393319761649	1.82236226483876e-53
COL2A1	sLGR5_female	0.351	0.153209867506039	0.496428571428571	0.166700770752336	sLGR5_male	0.628835757842019	1.79155486564678	4.36166728205747e-47
TXLNG	sLGR5_female	0.343	0.147134177585828	0.239	0.160493827160494	preGC_I	0.627518430443339	1.8294997972109	2.85146446846392e-47
ACSS2	sLGR5_female	0.338	0.14303491691677	0.360714285714286	0.156333128708819	sLGR5_male	0.627248944539028	1.85576610810363	1.34713793452854e-47
TSC22D3	sLGR5_female	0.667	0.37025107971598	0.832142857142857	0.390491780915354	sLGR5_male	0.627212354463055	0.940348357515824	1.50615757229613e-72
CARMIL1	sLGR5_female	0.416	0.207305468120928	0.41	0.221540140508833	Sertoli_WFDC2	0.626975017617186	1.5071514846567	1.42319540131855e-44
MCF2L2	sLGR5_female	0.301	0.113168874899349	0.229	0.125980492462997	granulosa	0.623560089927446	2.07162820573902	1.3508933188256e-50
KLHL22	sLGR5_female	0.436	0.224946929214552	0.368	0.239342473228293	preGC_I	0.623418877314802	1.42985981035505	7.96510911026835e-44
UBE2D1	sLGR5_female	0.464	0.246248444476978	0.365	0.26110087988541	preGC_I	0.623081673081555	1.34284843336542	1.15432793669843e-44
XBP1	sLGR5_female	0.666	0.372666715467389	0.621428571428571	0.392674442398199	sLGR5_male	0.622559751240795	0.934774401262455	7.40358074256793e-71
CSPP1	sLGR5_female	0.365	0.168582095015006	0.345	0.181979401132256	preGC_I	0.621909549299504	1.70386177890275	3.10151207674955e-44
LINC02076	sLGR5_female	0.222	0.0490447258619428	0.3	0.0608416888343224	sLGR5_male	0.621484571845533	2.79948005335826	1.12759152707152e-68
CDH3	sLGR5_female	0.623	0.350852792621331	0.631	0.369415455971625	preGC_I	0.620404190348654	0.995833371346154	1.71155227332549e-61
CXCR4	sLGR5_female	0.243	0.0658077739550545	0.4	0.077893731669054	sLGR5_male	0.620235580360521	2.55240979572231	2.00966645498043e-61
CHORDC1	sLGR5_female	0.482	0.261181465485689	0.471428571428571	0.276243093922652	sLGR5_male	0.620080480453762	1.28647402583768	8.91227962771848e-45
TUBB2B	sLGR5_female	0.296	0.111192445648196	0.442857142857143	0.123797830980151	sLGR5_male	0.618375210014837	2.08910543923931	1.16750882419524e-49
CERCAM	sLGR5_female	0.313	0.127077080740795	0.335714285714286	0.13975854307346	sLGR5_male	0.615933618799901	1.96783903769936	1.20753317622282e-46
ENC1	sLGR5_female	0.493	0.271649220408462	0.619	0.286747152308847	granulosa	0.615833145793121	1.24915445394142	2.58772447637153e-44
ADI1	sLGR5_female	0.599	0.340238635531806	0.537	0.357888275015347	coelEpi	0.61549311892868	1.02753442225155	5.34233153669865e-56
SHISAL2B	sLGR5_female	0.173	0.0185198740941366	0.154	0.0290566809903826	preGC_I	0.612161683262719	3.53850683966889	2.82454337797272e-89
FADS2	sLGR5_female	0.452	0.244711221726082	0.492857142857143	0.258850010231226	sLGR5_male	0.610880936241057	1.35150649610853	8.08683441080489e-41
SLC29A1	sLGR5_female	0.307	0.124295439572506	0.475	0.136757383534547	sLGR5_male	0.610790881782662	1.98954684619759	8.73446806896624e-46
MAD2L2	sLGR5_female	0.455	0.247712466144499	0.564285714285714	0.261851169770138	sLGR5_male	0.609690440876547	1.33997899093747	1.31322167227874e-40
PRSS35	sLGR5_female	0.643	0.369372666715467	0.75	0.388036286747152	preGC_I	0.608700078823638	0.946656421187617	9.68268872667985e-62
AHI1	sLGR5_female	0.411	0.214332772125027	0.542857142857143	0.227747084100675	sLGR5_male	0.608082533403785	1.47951954599461	2.68179853296161e-39
GBP2	sLGR5_female	0.232	0.0614157089524925	0.333	0.0730509515039902	Sertoli_WFDC2	0.6070507627938	2.61659811549052	8.1105083211627e-60
DEPP1	sLGR5_female	0.268	0.0918673596369226	0.339285714285714	0.103881044949185	sLGR5_male	0.606888367255552	2.2645088330431	9.06293103525908e-51
NOVA1	sLGR5_female	0.289	0.110972842398067	0.171	0.123115749266762	sKITLG	0.605348161084501	2.09463031517128	1.40125786425757e-46
RPP25	sLGR5_female	0.314	0.133299172827758	0.338	0.145624445808608	sKITLG	0.604991417726519	1.92672426027554	3.35915872848827e-43
HSPA6	sLGR5_female	0.248	0.075470316960691	0.231	0.0872382511424869	sKITLG	0.604899871321137	2.43911238435942	1.33852975989897e-54
ADGRL2	sLGR5_female	0.484	0.272161627992094	0.486	0.286610735966169	granulosa	0.604821067394126	1.24963030453332	9.94629402465162e-41
FSTL1	sLGR5_female	0.409	0.215137984042164	0.453571428571429	0.228360957642726	sLGR5_male	0.604022551520519	1.4768277543289	3.31685551440775e-38
ST6GALNAC4	sLGR5_female	0.415	0.220994070712247	0.38	0.234226860377873	preGC_IIb	0.60235803495955	1.45146514448084	8.85215851146271e-38
P3H1	sLGR5_female	0.45	0.249103286728644	0.507142857142857	0.262806084168883	sLGR5_male	0.601352478590448	1.33633884131211	3.32501006376859e-38
CDON	sLGR5_female	0.381	0.193909669863114	0.346	0.206670759156947	coelEpi	0.600695377512678	1.57662828743485	1.14982796324709e-37
FREM2	sLGR5_female	0.463	0.259790644901545	0.541	0.273651183411773	preGC_IIc	0.600002180064531	1.29590103685644	2.34611320117083e-38
AL359915.1	sLGR5_female	0.17	0.0190322816777688	0.232142857142857	0.0293295136757384	sLGR5_male	0.599957366132612	3.52916097725066	1.94456668546448e-85
SLC25A37	sLGR5_female	0.474	0.268135568406412	0.395	0.282177204829139	sKITLG	0.599714289232028	1.26522001947685	8.28080107013344e-39
CDKN1C	sLGR5_female	0.668	0.388917355976868	0.744	0.407953072778119	sKITLG	0.598930890100997	0.896603128893708	5.45321543898184e-64
TP53INP2	sLGR5_female	0.279	0.105043554644609	0.199	0.11690880567492	preGC_I	0.598834743211771	2.14636108678054	3.95443897669407e-46
CADPS2	sLGR5_female	0.259	0.088280506551497	0.192857142857143	0.0999249710115272	sLGR5_male	0.596563937102158	2.3033356644871	3.36425992474098e-49
MUC20-OT1	sLGR5_female	0.472	0.269013981406925	0.367857142857143	0.282859286542528	sLGR5_male	0.596044302526569	1.26280572569188	9.48883460180737e-38
CCDC196	sLGR5_female	0.143	0.00622209208696289	0.03	0.0155514630652752	preGC_I	0.595394879648687	4.16360055698382	3.08036135884861e-107
MAML3	sLGR5_female	0.336	0.15855354659249	0.335714285714286	0.170656844689994	sLGR5_male	0.594081766290233	1.76810049491141	5.03076357302299e-38
DES	sLGR5_female	0.369	0.187541175609399	0.542	0.199918150194393	sKITLG	0.5940336334889	1.60984724522737	3.10354991377426e-36
CHCHD3	sLGR5_female	0.618	0.365200204963033	0.585714285714286	0.38244321669736	sLGR5_male	0.594006205505418	0.961175089814592	7.29273812630584e-53
GPC6	sLGR5_female	0.235	0.0685162140399678	0.5	0.0798717686378828	sLGR5_male	0.593923213250029	2.52733282234055	3.31466250492215e-54
MAP4K4	sLGR5_female	0.595	0.352024009955347	0.646	0.368596957915558	Sertoli_WFDC2	0.593840634680614	0.998051486858175	3.44973025350176e-49
PTN	sLGR5_female	0.64	0.377937193470463	0.734	0.39581201827979	preGC_I	0.5931621643185	0.926815881747656	1.54985764412295e-56
TM2D2	sLGR5_female	0.474	0.272966839909231	0.453571428571429	0.286678944137508	sLGR5_male	0.592211974342312	1.24939235093315	7.34040411974945e-37
TCEAL7	sLGR5_female	0.526	0.309640582680624	0.610714285714286	0.324398062887934	sLGR5_male	0.592162346195113	1.12578392812759	1.49010187443326e-40
MGST2	sLGR5_female	0.67	0.394993045897079	0.645	0.413750767341928	Sertoli_WFDC2	0.591269303452124	0.882491497689738	4.26287740400385e-62
GLUD2	sLGR5_female	0.205	0.0459702803601493	0.435714285714286	0.0568174067253257	sLGR5_male	0.587922071473141	2.86791254377142	5.03467915130068e-62
LTBP2	sLGR5_female	0.327	0.153868677256423	0.322	0.165677648182252	preGC_I	0.587851581018102	1.79771125693609	5.55282292385205e-37
FKBP7	sLGR5_female	0.41	0.226264548715321	0.445	0.238796807857581	coelEpi	0.587178328643275	1.4321422649836	8.81022402621088e-34
SERPING1	sLGR5_female	0.712	0.418490593660786	0.854	0.438510333537958	coelEpi	0.586952794079163	0.824371901796578	5.73967384955805e-71
STAM	sLGR5_female	0.312	0.140985286582241	0.464285714285714	0.152649887456517	sLGR5_male	0.586437788684715	1.87960829706639	5.81262408666438e-38
SREK1IP1	sLGR5_female	0.765	0.443452163092014	0.656	0.465384353045495	Sertoli_WFDC2	0.585142111578973	0.764891649122841	1.40709073726327e-86
DCHS1	sLGR5_female	0.302	0.132567161993998	0.310714285714286	0.144123866039151	sLGR5_male	0.584998814833307	1.93708216832221	1.21077925523598e-38
TNFRSF1B	sLGR5_female	0.254	0.0895249249688895	0.549	0.100743469067594	preGC_I	0.582975187465349	2.29517790340688	8.34579299724354e-46
ZNF738	sLGR5_female	0.428	0.243686406558817	0.575	0.256258099720347	sLGR5_male	0.582752020075919	1.3615701403643	7.72800144271607e-33
CLSTN2	sLGR5_female	0.248	0.0845472512993192	0.299	0.0956960643885137	sPAX8e	0.581951370247279	2.3465781058358	8.56876537951444e-47
LRRC42	sLGR5_female	0.482	0.285630627333285	0.489285714285714	0.299024623149853	sLGR5_male	0.581884550223619	1.20722935731041	1.19417152904349e-34
HDAC7	sLGR5_female	0.263	0.0982358538906376	0.203571428571429	0.109474114998977	sLGR5_male	0.581773660548401	2.21206715037415	1.34019244878504e-43
SERPINE2	sLGR5_female	0.76	0.443598565258766	0.917857142857143	0.465179728531478	sLGR5_male	0.581651890676575	0.765331435100757	1.05027341442566e-83
TSPAN7	sLGR5_female	0.477	0.282190176414611	0.489285714285714	0.295477798240229	sLGR5_male	0.581540072618892	1.21916157781738	2.74530948882962e-34
GRM7	sLGR5_female	0.299	0.132420759827245	0.253	0.143782825182457	preGC_IIb	0.579895931606826	1.93945127627701	1.59088076805802e-37
ACTR1A	sLGR5_female	0.534	0.32354878852207	0.653571428571429	0.337903280813041	sLGR5_male	0.579387637524704	1.08499557588896	5.81262408666438e-38
LRRC17	sLGR5_female	0.406	0.22831417904985	0.466	0.240433803969716	sKITLG	0.57867605110091	1.4253104706919	1.30844018666455e-31
ATF7IP2	sLGR5_female	0.384	0.209721103872337	0.4	0.221608348680172	Sertoli_WFDC2	0.578627961703359	1.50684365026916	8.69354059087375e-32
IFT57	sLGR5_female	0.613	0.372813117634141	0.532	0.389195825659914	sKITLG	0.578471337003034	0.943672654164819	1.18555577208363e-47
GSTM1	sLGR5_female	0.376	0.202986604201742	0.343	0.214787531546279	Sertoli_WFDC2	0.578327842778802	1.53810596483724	6.98824215580988e-32
DNAJB4	sLGR5_female	0.546	0.332698923944074	0.502	0.347247800286474	sKITLG	0.577513281091617	1.05771663203593	1.16668727338131e-38
SEMA6D	sLGR5_female	0.327	0.159871166093258	0.306	0.171270718232044	preGC_I	0.576994713357282	1.76450982678068	5.52698578930427e-34
IFRD1	sLGR5_female	0.416	0.237757118805358	0.453571428571429	0.249914739785826	sLGR5_male	0.576840351420005	1.38663546014424	3.39174856515618e-31
DSEL	sLGR5_female	0.667	0.403191567235195	0.796	0.421185458017871	preGC_IIc	0.576742910302872	0.864682024442087	4.2409229060623e-57
ZNF667-AS1	sLGR5_female	0.566	0.346241124368641	0.453	0.361230475410954	sKITLG	0.576323323989924	1.01823908832142	1.44795522689943e-40
NT5C3B	sLGR5_female	0.448	0.264475514237611	0.496428571428571	0.27699338380738	sLGR5_male	0.575125222896881	1.28376165825197	1.93664714544575e-31
RAMMET	sLGR5_female	0.511	0.311031403264768	0.560714285714286	0.32467089557329	sLGR5_male	0.57484599498224	1.1249432387128	7.92244104570923e-35
RNF8	sLGR5_female	0.417	0.240026352390015	0.395	0.252097401268672	preGC_IIb	0.57460087707468	1.37793975317669	1.18876126332973e-30
SYNE1	sLGR5_female	0.303	0.139008857331089	0.310714285714286	0.150194393288316	sLGR5_male	0.574434935202659	1.89582486865564	1.65238829257957e-35
ATP2B1-AS1	sLGR5_female	0.324	0.158846350925994	0.442857142857143	0.170111179319282	sLGR5_male	0.573902191342244	1.77130305969828	2.2324654628634e-33
HES4	sLGR5_female	0.319	0.154234682673304	0.501	0.165473023668235	granulosa	0.573864123762532	1.79894709643427	8.7239934344843e-34
DNAJB9	sLGR5_female	0.405	0.230656613717883	0.426	0.242548257281222	preGC_IIb	0.57370460866831	1.41655458930447	2.28175377342004e-30
FHL3	sLGR5_female	0.275	0.113168874899349	0.332142857142857	0.124207080008185	sLGR5_male	0.573596404207931	2.08580510621066	5.65583191620241e-39
ZNF10	sLGR5_female	0.325	0.160456774760266	0.362	0.171679967260078	preGC_IIb	0.572690037010958	1.76212319080295	5.66876538238983e-33
ZNF431	sLGR5_female	0.671	0.408242441988141	0.8	0.426164654525612	sLGR5_male	0.572315690754976	0.852929494418743	1.21639511997169e-56
CASP6	sLGR5_female	0.474	0.286216236000293	0.424	0.299024623149853	sKITLG	0.572226715365136	1.20722935731041	8.13442826080723e-32
MXRA8	sLGR5_female	0.286	0.124734646072762	0.422	0.135734260964464	sPAX8e	0.571158092710842	1.99705626821973	1.17939680613394e-36
TMEM206	sLGR5_female	0.307	0.144791742917795	0.482142857142857	0.155855671509447	sLGR5_male	0.570659238961257	1.85882488260996	4.93900810363541e-34
KREMEN2	sLGR5_female	0.216	0.0609033013688603	0.241	0.0714821635631949	coelEpi	0.569874381348372	2.63830732105728	2.30509962071694e-51
HIF3A	sLGR5_female	0.376	0.208549886538321	0.42	0.219971352568038	preGC_I	0.569360991722355	1.51425795670839	1.28681112595961e-29
CSRP1	sLGR5_female	0.566	0.351072395871459	0.752	0.365732214719323	coelEpi	0.569313288802576	1.00585386714236	9.81916314003743e-39
RUNX1T1	sLGR5_female	0.558	0.346533928702145	0.591	0.360957642725599	preGC_IIb	0.568599020672507	1.01899466070342	1.19656634221706e-37
H2AFY2	sLGR5_female	0.619	0.383280872556914	0.75	0.399358843189414	sLGR5_male	0.568176949232091	0.917894909906447	8.90338601222522e-46
GLCE	sLGR5_female	0.335	0.172461752433936	0.367857142857143	0.183548189073051	sLGR5_male	0.567918141795805	1.69527803521136	5.3432907943269e-31
SYMPK	sLGR5_female	0.399	0.229631798550619	0.352	0.241184093854444	sKITLG	0.567455710110112	1.42219476218073	7.54450790436016e-29
FAM84A	sLGR5_female	0.245	0.0879877022179928	0.173	0.0986972239274265	preGC_IIb	0.567346122530161	2.31569845930678	1.03785829158818e-42
TP53I11	sLGR5_female	0.204	0.0519727691969841	0.25	0.0623422686037787	sLGR5_male	0.566123585354759	2.77511561448411	3.98296770132584e-54
GPX8	sLGR5_female	0.434	0.259424639484664	0.454	0.271332105586249	coelEpi	0.566114689311566	1.30441172652435	7.218168403577e-29
CCDC126	sLGR5_female	0.311	0.15116023717151	0.303	0.162062615101289	preGC_I	0.565949249196732	1.81977250545573	2.35860576202115e-32
SMC5	sLGR5_female	0.502	0.311104604348144	0.59	0.324125230202578	sKITLG	0.565565913097683	1.12662532489578	7.10955410200546e-32
ARRDC3	sLGR5_female	0.411	0.241490374057536	0.446428571428571	0.253052315667417	sLGR5_male	0.564779361468418	1.37415903033678	3.22098463123075e-28
DNMT3A	sLGR5_female	0.548	0.342873874533343	0.535714285714286	0.356865152445263	sLGR5_male	0.564657716455074	1.03039729280123	1.38660521098639e-35
UGDH	sLGR5_female	0.377	0.212429543957251	0.342	0.22365459382034	sKITLG	0.564614958228293	1.49765240909362	1.99608966441517e-28
CBLB	sLGR5_female	0.491	0.304296903594173	0.534	0.31703158038333	preGC_I	0.5640381587166	1.14875388740652	8.77160039071195e-31
CCDC14	sLGR5_female	0.403	0.235341483053949	0.316	0.246777163904236	Sertoli_WFDC2	0.563905616553159	1.39926951998302	5.53899938650841e-28
UBE2G1	sLGR5_female	0.401	0.233804260303052	0.435714285714286	0.24520837596344	sLGR5_male	0.56366441322903	1.40564691578312	6.30114586360197e-28
EPM2AIP1	sLGR5_female	0.442	0.267769562989532	0.406	0.279653502489598	Sertoli_WFDC2	0.563198138494672	1.27420393324587	2.22145276626514e-28
CNKSR1	sLGR5_female	0.217	0.064636556621038	0.147	0.075028988472819	preGC_I	0.562004117791941	2.5898807271518	2.86748019219914e-48
HMGCS1	sLGR5_female	0.561	0.353048825122612	0.775	0.36723279448878	sLGR5_male	0.561986975498286	1.0017593146137	2.6846625003665e-36
IDH1	sLGR5_female	0.529	0.332332918527194	0.556	0.345747220517018	Sertoli_WFDC2	0.561823046809469	1.06204734746592	4.44697757691511e-33
CPE	sLGR5_female	0.716	0.437522875338555	0.81	0.456517290771434	sPAX8e	0.561436151231738	0.784128702837622	4.60579231082052e-64
ARMT1	sLGR5_female	0.518	0.325378815606471	0.622	0.338517154355092	preGC_I	0.561087504361727	1.08318051035082	5.62836112038002e-32
HMGB3	sLGR5_female	0.462	0.284825415416148	0.526	0.296910169838347	sKITLG	0.561018447706317	1.21432564438597	1.44519124136572e-28
TSPAN14	sLGR5_female	0.496	0.31081180001464	0.653571428571429	0.323443148489189	sLGR5_male	0.559851031979205	1.12873191931291	4.31392184474774e-30
KIF26B	sLGR5_female	0.204	0.0540956006148891	0.15	0.0643203055726076	sLGR5_male	0.559751500274181	2.74387990330481	8.92301057981232e-52
SH3BGRL3	sLGR5_female	0.782	0.467462118439353	0.75	0.488916172157424	sLGR5_male	0.559571228863696	0.715564231283498	6.32991740959172e-84
ARPP21	sLGR5_female	0.173	0.0296464387672938	0.15	0.0394243230338995	sPAX8e	0.559373410886998	3.23337231726589	2.72571962568037e-65
AKIRIN1	sLGR5_female	0.483	0.301808066759388	0.459	0.314166837187095	preGC_I	0.559232423984337	1.15783110555763	3.61691753213235e-29
TEAD2	sLGR5_female	0.478	0.298148012590586	0.685714285714286	0.310415387763454	sLGR5_male	0.559185392766536	1.16984391792162	6.9359667597667e-29
DMD	sLGR5_female	0.485	0.303491691677037	0.508	0.315872041470568	ovarianSurf	0.558922768536894	1.15241807945751	3.30980717203312e-29
ATP1A2	sLGR5_female	0.201	0.0518995681136081	0.296428571428571	0.062069435918423	sLGR5_male	0.558679818871901	2.77950158642737	1.76992315532215e-52
EML4	sLGR5_female	0.519	0.328306858941512	0.48	0.341313689379988	ovarianSurf	0.557900770148409	1.07495331435146	2.76907045030185e-31
HSDL2	sLGR5_female	0.578	0.366517824463802	0.601	0.380942636927904	granulosa	0.557831542223409	0.965106474434963	3.1453435082236e-37
BLVRA	sLGR5_female	0.61	0.385989312641827	0.682	0.401268671986904	sPAX8m	0.557005683355023	0.913124071073809	2.37129960400719e-41
CHD7	sLGR5_female	0.379	0.219237244711222	0.482142857142857	0.230134370097538	sLGR5_male	0.556785838753461	1.46909192283235	1.68857910781999e-26
PIGC	sLGR5_female	0.462	0.28811946416807	0.464285714285714	0.299979537548598	sLGR5_male	0.556266948848484	1.20404101482356	1.86700724331433e-27
ANTXR2	sLGR5_female	0.31	0.155845106507576	0.345	0.166359729895641	preGC_I	0.556016864193927	1.79360278772234	8.44829675607921e-30
CACHD1	sLGR5_female	0.347	0.190835224361321	0.409	0.201486938135189	sKITLG	0.555904660827888	1.60203072284694	2.64183369387815e-27
EFNA4	sLGR5_female	0.409	0.245736036893346	0.396428571428571	0.256871973262397	sLGR5_male	0.555903587978957	1.35917747672117	4.11553115570224e-26
CCDC170	sLGR5_female	0.43	0.263231095820218	0.512	0.274606097810518	preGC_I	0.555739559287567	1.29241757973853	2.40757746636281e-26
NSG1	sLGR5_female	0.694	0.431227582168216	0.792	0.44915080826683	preGC_I	0.555475220802053	0.800396571760883	8.40519860007956e-57
COL6A2	sLGR5_female	0.502	0.318644315935876	0.665	0.331150671850488	coelEpi	0.554801266216845	1.10518180521284	2.71183585114422e-29
LINC01089	sLGR5_female	0.261	0.108996413146915	0.183	0.119364299843121	sPAX8e	0.554775106064404	2.1255751190207	1.07167689534711e-35
STXBP5L	sLGR5_female	0.157	0.0199106946782812	0.0964285714285714	0.0292613055043994	sLGR5_male	0.554443814920609	3.53148926701025	8.40449161216988e-73
REV3L	sLGR5_female	0.451	0.281165361247346	0.441	0.292749471386672	preGC_IIb	0.554025575066642	1.22843808218768	1.61145404772961e-26
PLPP5	sLGR5_female	0.373	0.216016397042676	0.353571428571429	0.226723961530591	sLGR5_male	0.553540217176171	1.48402202996293	7.52894728094173e-26
IGDCC4	sLGR5_female	0.279	0.127296683990923	0.244	0.137644089761953	preGC_IIb	0.553280431821894	1.98308398502471	1.64303620483175e-32
MAFB	sLGR5_female	0.247	0.0968450333064929	0.249	0.107086829002114	preGC_I	0.55182647603619	2.23411528759591	1.99133226803147e-37
ATXN7L3B	sLGR5_female	0.638	0.405387599736476	0.553	0.421253666189209	preGC_I	0.55156382012107	0.864520094233652	2.09590088054432e-44
TRAF4	sLGR5_female	0.304	0.152624258839031	0.339285714285714	0.162949321328695	sLGR5_male	0.551552075738186	1.81431603861246	3.46076308336859e-29
ZNF503	sLGR5_female	0.514	0.329551277358905	0.666	0.342132187436055	preGC_I	0.551294865263511	1.07255810362551	2.5308823333626e-29
HRC	sLGR5_female	0.158	0.0212283141790498	0.132142857142857	0.030557260759839	sLGR5_male	0.551128166656678	3.48815295352328	1.24309573182963e-70
AC245595.1	sLGR5_female	0.448	0.281018959080594	0.425	0.292408430529978	sLGR5_male	0.550862466264449	1.22960371934029	1.06233421752253e-25
SVBP	sLGR5_female	0.666	0.420613425078691	0.639285714285714	0.437350794625196	sLGR5_male	0.550795101691075	0.827019672208821	2.14801415327667e-49
AC116407.2	sLGR5_female	0.177	0.0348437156869922	0.099	0.0445399358843189	preGC_I	0.550712323029145	3.11136905666183	1.23453228762476e-59
ANAPC13	sLGR5_female	0.619	0.395944659980968	0.511	0.411158856831048	Sertoli_WFDC2	0.550152112612773	0.888775626191878	6.6919854467654e-41
PNCK	sLGR5_female	0.57	0.367396237464314	0.709	0.38121546961326	preGC_IIb	0.549702600201083	0.964390526668566	3.14682303319308e-34
MEF2A	sLGR5_female	0.42	0.259351438401288	0.433	0.270308983016165	preGC_I	0.549439628954088	1.30818959274783	9.75119607310025e-25
ZNF503-AS2	sLGR5_female	0.328	0.177439426103506	0.376	0.187708887524725	preGC_IIb	0.54869905969829	1.67286298688503	1.4186950369924e-26
RIMS4	sLGR5_female	0.303	0.153575872922919	0.565	0.163767819384762	Sertoli_WFDC2	0.548219593684254	1.80930558971701	2.03512310349963e-28
SYT1	sLGR5_female	0.367	0.214113168874899	0.475	0.224541300047746	sLGR5_male	0.548186294059859	1.4936956241413	9.65231595648379e-25
DDA1	sLGR5_female	0.439	0.27574848107752	0.439285714285714	0.286883568651524	sLGR5_male	0.548170006227597	1.24867882967562	7.9210346896137e-25
LINC01116	sLGR5_female	0.566	0.366151819046922	0.659	0.379783098015142	ovarianSurf	0.547975720900989	0.968154983924009	2.37884529070829e-33
PARVA	sLGR5_female	0.365	0.212575946124003	0.385714285714286	0.22297251210695	sLGR5_male	0.54775797441313	1.50070677921405	1.07160213976448e-24
NRK	sLGR5_female	0.411	0.253129346314325	0.783	0.263897414910306	sKITLG	0.547532075638716	1.33219483123775	3.25864008808057e-24
PLA2G12A	sLGR5_female	0.789	0.478442280945758	0.775	0.499624855057636	sLGR5_male	0.547485326369814	0.693897752052996	2.18179395139163e-82
NR2F2	sLGR5_female	0.84	0.497840568040407	0.907142857142857	0.521178637200737	sLGR5_male	0.547396434724186	0.651662422290698	7.25998664415427e-104
MOV10	sLGR5_female	0.43	0.269745992240685	0.446428571428571	0.280676625059682	sLGR5_male	0.546337391315651	1.27055207282709	3.27345157468203e-24
ZNF714	sLGR5_female	0.362	0.21096552228973	0.421428571428571	0.221267307823477	sLGR5_male	0.546034924994472	1.50838377070296	2.20569022124559e-24
TNS3	sLGR5_female	0.412	0.255032574482102	0.456	0.265739035536457	preGC_I	0.545999094724446	1.32524052117584	7.01111602410114e-24
WDR77	sLGR5_female	0.349	0.199033745699436	0.343	0.209262669667826	sKITLG	0.54589359318444	1.56416502345112	8.30788867054566e-25
MMP2	sLGR5_female	0.541	0.352097211038723	0.667	0.364981924834595	sKITLG	0.545277929166185	1.00790744762696	3.69096228565073e-30
PHYH	sLGR5_female	0.367	0.216528804626308	0.322	0.22679216970193	sKITLG	0.54452569245533	1.48372123284831	6.71978979034211e-24
RCBTB2	sLGR5_female	0.344	0.195520093697387	0.35	0.205647636586863	sLGR5_male	0.544067330411281	1.58159107677698	1.35175405615286e-24
NR2F2-AS1	sLGR5_female	0.348	0.19932655003294	0.510714285714286	0.209467294181843	sLGR5_male	0.54398930759311	1.56318766549744	2.10858822675229e-24
RIPOR1	sLGR5_female	0.276	0.129858721909084	0.225	0.139826751244799	sLGR5_male	0.542988907410404	1.96735111380581	4.4578116709216e-30
GSTA4	sLGR5_female	0.675	0.431227582168216	0.791	0.447854853011391	Sertoli_WFDC2	0.54221810931679	0.803286087876726	8.30534825533604e-49
MORC4	sLGR5_female	0.207	0.0630261327867652	0.124	0.0728463269899734	Sertoli_WFDC2	0.542216455448552	2.61940316641812	1.51728017899069e-44
COA1	sLGR5_female	0.577	0.377205182636703	0.528571428571429	0.390832821772048	sLGR5_male	0.542077292084409	0.939475376229479	3.69836878015311e-33
TRO	sLGR5_female	0.347	0.199692555449821	0.460714285714286	0.209740126867199	sLGR5_male	0.541974443977083	1.56188600569765	5.65390429796538e-24
AL138899.1	sLGR5_female	0.194	0.0515335626967279	0.237	0.0612509378623559	Sertoli_WFDC2	0.541798566821397	2.79277611763606	6.72217937901072e-49
TSPYL4	sLGR5_female	0.347	0.199912158699949	0.308	0.209944751381215	preGC_IIb	0.541636072424186	1.56091087153944	6.73954677324186e-24
CD200	sLGR5_female	0.551	0.361466949710856	0.558	0.374394652479367	Sertoli_WFDC2	0.541327094380995	0.982444817388375	3.56770219278076e-30
MED15	sLGR5_female	0.408	0.254959373398726	0.55	0.265397994679763	sLGR5_male	0.541222082885114	1.32652471295371	8.66366398470781e-23
MXD1	sLGR5_female	0.224	0.0794963765463729	0.191	0.0893527044539936	sKITLG	0.540996684422447	2.41516376974307	2.89571356384258e-39
DNAAF2	sLGR5_female	0.432	0.275455676744016	0.492857142857143	0.286133278766796	sLGR5_male	0.540560548959966	1.25129756703696	5.58110730065808e-23
SMYD3	sLGR5_female	0.328	0.183075909523461	0.360714285714286	0.192960916717823	sLGR5_male	0.539647777600837	1.6452676146367	2.17820589803431e-24
PGM2L1	sLGR5_female	0.222	0.0782519581289803	0.246428571428571	0.088056749198554	sLGR5_male	0.53940978251034	2.42977379509162	2.86082857784174e-39
MAP1LC3A	sLGR5_female	0.799	0.487885220701266	0.796428571428571	0.509105790873747	sLGR5_male	0.539404455285457	0.675099443411085	2.07166887479563e-83
FGF17	sLGR5_female	0.133	0.00885733108850011	0.0428571428571429	0.0173248755200873	sLGR5_male	0.539396385216324	4.05561191891973	2.99564979493569e-85
USP6NL	sLGR5_female	0.307	0.162945611595052	0.287	0.172771298001501	preGC_I	0.539026466532533	1.75578653593659	9.78469343186641e-26
MB21D2	sLGR5_female	0.287	0.143181319083522	0.361	0.152990928313212	preGC_IIb	0.538807098956982	1.87737665141806	1.25741289083875e-27
TNNI2	sLGR5_female	0.139	0.0120781787570456	0.0551181102362205	0.0207352840870336	FetalLeydig-like	0.538752669349954	3.87591848453204	3.60819668625243e-79
SRP19	sLGR5_female	0.446	0.288046263084694	0.434	0.298819998635837	Sertoli_WFDC2	0.538729598563467	1.20791389812437	6.04352013706533e-23
RHOD	sLGR5_female	0.223	0.0795695776297489	0.228	0.0893527044539936	ovarianSurf	0.538581520652704	2.41516376974307	9.45158432223536e-39
KCNQ1OT1	sLGR5_female	0.525	0.346680330868897	0.531	0.358843189414092	sKITLG	0.538056636708915	1.02486978420746	4.12983028770244e-27
LCA5	sLGR5_female	0.353	0.208257082204817	0.347	0.218129731941887	preGC_I	0.537500848268161	1.52266529254436	1.02434022679413e-22
TDG	sLGR5_female	0.412	0.261035063318937	0.421428571428571	0.271332105586249	sLGR5_male	0.537417631328031	1.30441172652435	5.4380651348461e-22
APOBEC3G	sLGR5_female	0.283	0.140033672498353	0.438	0.149785144260282	Sertoli_WFDC2	0.537290607476403	1.89855338330884	1.09009288992755e-27
FAT3	sLGR5_female	0.18	0.0411390088573311	0.165	0.0506104631334834	preGC_I	0.537047449698759	2.98359694277088	7.33999773090834e-53
ZNF821	sLGR5_female	0.306	0.163238415928556	0.360714285714286	0.172975922515517	sLGR5_male	0.536908478336631	1.75460287038115	2.67760155851132e-25
CREB3L1	sLGR5_female	0.326	0.182929507356709	0.415	0.192688084032467	coelEpi	0.536818508808618	1.64668254235772	7.66795479597976e-24
NAGK	sLGR5_female	0.37	0.2248005270478	0.315	0.234704317577246	preGC_I	0.53628864865209	1.44942878014078	5.62661136414104e-22
SLC35B1	sLGR5_female	0.325	0.182417099773077	0.467857142857143	0.192142418661756	sLGR5_male	0.536093485870115	1.64951841806189	9.91436654660351e-24
PHF20L1	sLGR5_female	0.425	0.273040040992607	0.396	0.283404951913239	preGC_I	0.535873353425704	1.26087847864872	7.87128561985081e-22
STT3B	sLGR5_female	0.537	0.356416074957909	0.615	0.368733374258236	preGC_I	0.535754943537705	0.997681459101872	1.37931665162976e-27
LYPLA2	sLGR5_female	0.475	0.312715028182417	0.461	0.323784189345884	preGC_IIb	0.5356470820088	1.12767806738695	2.06722464213512e-23
AC025164.1	sLGR5_female	0.216	0.0740794963765464	0.132	0.0837596344042016	sPAX8e	0.535637680681934	2.47980407723118	1.16840783306466e-39
BCAT2	sLGR5_female	0.745	0.468852939023498	0.71	0.487688425073324	preGC_I	0.534968519936407	0.718078550250211	6.95556891353196e-64
ATP6V1C2	sLGR5_female	0.193	0.0530707854476246	0.131	0.0626151012891344	sPAX8e	0.53475451749633	2.77074879531777	9.90719685140144e-47
APTX	sLGR5_female	0.355	0.211990337456994	0.295	0.22174476502285	preGC_I	0.534711034300197	1.50622826563436	5.06003575282754e-22
FEZ1	sLGR5_female	0.403	0.255398579898983	0.521	0.265466202851102	granulosa	0.534485900280845	1.32626774263237	2.614303370834e-21
SLITRK2	sLGR5_female	0.204	0.0633189371202694	0.314285714285714	0.0729145351613123	sLGR5_male	0.534167324082297	2.61846727491322	9.65633869179716e-43
MATR3-1	sLGR5_female	0.437	0.284166605665764	0.456	0.294591092012823	sKITLG	0.534086984671195	1.22216701297756	1.05890339231163e-21
UPF3B	sLGR5_female	0.466	0.307078544762462	0.45	0.317918286610736	sKITLG	0.534017774537534	1.14596088956552	1.17981085755554e-22
RASL12	sLGR5_female	0.314	0.173047361100944	0.416	0.182661482845645	Sertoli_WFDC2	0.533837887141764	1.70012065968715	6.24568435800876e-24
ODF2L	sLGR5_female	0.388	0.242881194641681	0.36	0.252779482982061	preGC_I	0.533592258288068	1.37523777909296	3.81423968660127e-21
VTA1	sLGR5_female	0.437	0.284532611082644	0.4	0.294932132869518	sLGR5_male	0.533581373137295	1.22101000717917	1.35071057578349e-21
EBLN3P	sLGR5_female	0.341	0.199546153283069	0.306	0.209194461496487	sKITLG	0.533491438441989	1.56449102182401	2.76543113378089e-22
NIT2	sLGR5_female	0.407	0.259863845984921	0.393	0.269899733988132	ovarianSurf	0.533049831033006	1.30970474455284	5.05672895698061e-21
GGT7	sLGR5_female	0.253	0.111997657565332	0.371428571428571	0.121615169497306	sLGR5_male	0.533044072723006	2.10689356807512	8.48676090932685e-31
TUBG1	sLGR5_female	0.35	0.208403484371569	0.339285714285714	0.218061523770548	sLGR5_male	0.533042312907448	1.52297803687842	8.00194263425268e-22
PTPRG	sLGR5_female	0.311	0.170704926432911	0.333	0.180274196848782	preGC_IIb	0.532828920384866	1.71327627133398	6.50835634325124e-24
CYP51A1	sLGR5_female	0.405	0.258326623234024	0.610714285714286	0.268330946047336	sLGR5_male	0.53279134573065	1.31553418698926	5.88626541573349e-21
GSS	sLGR5_female	0.45	0.295585974672425	0.578571428571429	0.306118272969102	sLGR5_male	0.53270268243108	1.18378373873573	8.86334298148189e-22
PDK1	sLGR5_female	0.447	0.293536344337896	0.718	0.304003819657595	preGC_IIb	0.532249610807294	1.19071501299171	1.36657308578414e-21
MED31	sLGR5_female	0.461	0.304736110094429	0.493	0.315394584271196	granulosa	0.53196208754517	1.15393077558605	5.16684477558984e-22
MED21	sLGR5_female	0.506	0.338042603030525	0.475	0.349498669940659	preGC_I	0.53193529459835	1.05125552292164	2.28896772789973e-24
MMP14	sLGR5_female	0.336	0.195959300197643	0.403571428571429	0.205511220244185	sLGR5_male	0.531637561327476	1.58225464680796	4.27245513499803e-22
EFNA1	sLGR5_female	0.364	0.222531293463143	0.482	0.232180615237705	coelEpi	0.53152724943318	1.460239696245	4.54864600927826e-21
GSTM2	sLGR5_female	0.549	0.36746943854769	0.593	0.379851306186481	preGC_I	0.531418495889379	0.967975402348596	1.12091382948117e-27
PKIG	sLGR5_female	0.609	0.403996779152331	0.631	0.417979673964941	ovarianSurf	0.531244386981363	0.872322474517837	1.39002343338677e-34
PREB	sLGR5_female	0.36	0.219017641461094	0.331	0.228633790328081	preGC_I	0.531228140761065	1.47563372433629	4.17206528575139e-21
FHDC1	sLGR5_female	0.232	0.0917209574701706	0.252	0.101289134438306	granulosa	0.53122806325074	2.28977613470146	2.43841309780949e-34
SWI5	sLGR5_female	0.522	0.34975477637069	0.575	0.36150330809631	sPAX8m	0.531126693099783	1.01748408639805	2.53637905273465e-25
SMTNL2	sLGR5_female	0.237	0.0968450333064929	0.355	0.106404747288725	coelEpi	0.53099970530964	2.24050508569468	3.30399829092163e-33
KIF1A	sLGR5_female	0.277	0.137618036746944	0.299	0.147125025578064	preGC_I	0.530862893455103	1.91647253954911	9.77339776283586e-27
FKBP4	sLGR5_female	0.504	0.337530195446893	0.565	0.348884796398609	ovarianSurf	0.530718807806479	1.05301350755254	5.70869616279424e-24
AL135925.1	sLGR5_female	0.334	0.195080887197131	0.496428571428571	0.20455630584544	sLGR5_male	0.530028610401211	1.58691200718926	7.83885643628937e-22
AL450998.2	sLGR5_female	0.392	0.249615694312276	0.344	0.259327467430598	sKITLG	0.529068155852837	1.34966366288989	3.6730284001235e-20
KPNA2	sLGR5_female	0.418	0.272161627992094	0.553571428571429	0.2821089966578	sLGR5_male	0.5289630197555	1.26546176975	2.8945926422661e-20
VBP1	sLGR5_female	0.511	0.343825488617232	0.553571428571429	0.355228156333129	sLGR5_male	0.528882446047478	1.03499500204986	4.89116064141341e-24
MARCH5	sLGR5_female	0.489	0.32816045677476	0.535714285714286	0.339131027897142	sLGR5_male	0.528789310587447	1.08136873330766	1.1744883436996e-22
LYPLA1	sLGR5_female	0.405	0.261620671985945	0.439	0.271400313757588	sKITLG	0.528184952082091	1.30416037551134	5.48596547997677e-20
GLS	sLGR5_female	0.335	0.197350120781788	0.32	0.206738967328286	granulosa	0.528059933474955	1.57629830888046	2.41804533620321e-21
WNT6	sLGR5_female	0.694	0.450699070346241	0.805	0.467294181842985	granulosa	0.527992618275144	0.760796279935365	7.7072255475293e-49
ACAA1	sLGR5_female	0.431	0.283727399165508	0.521428571428571	0.293772593956756	sLGR5_male	0.52795314868107	1.22494930088415	2.81667452904953e-20
PGM1	sLGR5_female	0.517	0.348729961203426	0.557	0.36020735284087	preGC_I	0.527895998980598	1.02107543323133	3.04396945104811e-24
SHC1	sLGR5_female	0.296	0.158846350925994	0.346428571428571	0.168201350521792	sLGR5_male	0.527647676655337	1.78259350221397	6.44500696925603e-24
LPAR2	sLGR5_female	0.326	0.18900519727692	0.302	0.198349362253598	sKITLG	0.527378463214863	1.61772534728485	1.16867669692129e-21
KLHL4	sLGR5_female	0.353	0.215796793792548	0.377	0.225155173589796	sKITLG	0.52631080529203	1.49096545408507	3.03347612362971e-20
BIN1	sLGR5_female	0.392	0.251592123563429	0.403	0.261169088056749	coelEpi	0.5262941959087	1.34258723446097	1.38858920833038e-19
RPRD1A	sLGR5_female	0.472	0.317399897518483	0.504	0.327944887797558	Sertoli_WFDC2	0.52623738298936	1.11490970972322	2.83822466179481e-21
SULT1C4	sLGR5_female	0.248	0.110460434814435	0.212	0.119841757042494	sPAX8e	0.526152608242289	2.12158309775117	1.00055473818878e-29
OTUD6B-AS1	sLGR5_female	0.397	0.256496596149623	0.385	0.266080076393152	Sertoli_WFDC2	0.525611316643348	1.32395797643161	1.96557492498916e-19
BASP1	sLGR5_female	0.468	0.314837859600322	0.65	0.32528476911534	sLGR5_male	0.525589397255539	1.12305426764004	5.77719149408443e-21
MTCH2	sLGR5_female	0.488	0.329844081692409	0.492857142857143	0.340631607666598	sLGR5_male	0.52555341296809	1.07695371509855	6.44713094422023e-22
KIAA1324	sLGR5_female	0.284	0.148232193836469	0.434	0.157492667621581	preGC_I	0.52493889094979	1.84837637658377	1.93189783764157e-24
GSTO1	sLGR5_female	0.532	0.361320547544104	0.563	0.37296228088125	Sertoli_WFDC2	0.524699889666234	0.986277988094424	1.08743973921458e-24
SLC39A7	sLGR5_female	0.383	0.245077227142962	0.439285714285714	0.254484687265534	sLGR5_male	0.524141096670652	1.36851461271711	3.43389768997936e-19
UBE2E2	sLGR5_female	0.497	0.337456994363517	0.506	0.348339131027897	coelEpi	0.524125643367438	1.05457875929062	4.01169413135324e-22
ZNF493	sLGR5_female	0.396	0.256716199399751	0.377	0.26621649273583	Sertoli_WFDC2	0.524084385828029	1.32344541875765	4.05002273410801e-19
SACM1L	sLGR5_female	0.306	0.171510138350048	0.327	0.180683445876816	preGC_I	0.523568661179856	1.71100869666619	4.15016408227475e-22
G3BP2	sLGR5_female	0.52	0.354073640289876	0.514	0.365391173862629	preGC_IIb	0.523529130829798	1.0067867900573	1.62440716638887e-23
CERS2	sLGR5_female	0.429	0.285703828416661	0.439285714285714	0.295477798240229	sLGR5_male	0.523020316883657	1.21916157781738	3.15792452182792e-19
TSN	sLGR5_female	0.432	0.288339067418198	0.457142857142857	0.298137916922447	sLGR5_male	0.522806007344378	1.21019909107495	3.02876070571568e-19
HDAC3	sLGR5_female	0.414	0.273259644242735	0.521428571428571	0.282859286542528	sLGR5_male	0.52280157043644	1.26280572569188	5.92044813831245e-19
ZNF593	sLGR5_female	0.461	0.311690213015153	0.433	0.321874360548394	Sertoli_WFDC2	0.522586831331675	1.13359399421188	4.58170889261082e-20
C18orf32	sLGR5_female	0.409	0.269160383573677	0.474	0.278698588090853	Sertoli_WFDC2	0.522548383919325	1.2776244105607	7.42098971924415e-19
MTF2	sLGR5_female	0.467	0.316667886684723	0.532142857142857	0.326921765227474	sLGR5_male	0.522122058625622	1.11803438677863	3.31014157301202e-20
EPB41	sLGR5_female	0.26	0.125100651489642	0.317857142857143	0.134301889366346	sLGR5_male	0.521992927897776	2.00766510729914	1.08977964855234e-26
C11orf49	sLGR5_female	0.484	0.329624478442281	0.487	0.340154150467226	preGC_I	0.521924488109797	1.07835638039214	5.9082520251392e-21
RNF146	sLGR5_female	0.423	0.281531366664227	0.542857142857143	0.291180683445877	sLGR5_male	0.521902179553268	1.2338112991803	6.78721405532304e-19
PLAGL1	sLGR5_female	0.657	0.437010467754923	0.838	0.452015551463065	sKITLG	0.521683421859475	0.794038693850038	9.9349110866013e-40
FAM92A	sLGR5_female	0.435	0.291779518336871	0.510714285714286	0.301548325489394	sLGR5_male	0.521488871568729	1.19882499211202	4.77384965305277e-19
PTAR1	sLGR5_female	0.289	0.155479101090696	0.231	0.164586317440829	granulosa	0.521448514770524	1.80432012031323	4.41057490157419e-23
RFXANK	sLGR5_female	0.406	0.267549959739404	0.433	0.27699338380738	Sertoli_WFDC2	0.521207233250298	1.28376165825197	1.46216796751797e-18
RP9	sLGR5_female	0.456	0.308908571846863	0.5	0.31894140918082	sLGR5_male	0.521093025685915	1.14274786334631	1.39709597971408e-19
PDHA1	sLGR5_female	0.458	0.31081180001464	0.532142857142857	0.32085123797831	sLGR5_male	0.520644184932789	1.1367776963598	1.46199599508109e-19
MCTS1	sLGR5_female	0.556	0.38020642705512	0.632142857142857	0.392196985198827	sLGR5_male	0.520411024993659	0.935991052146868	7.52383456968796e-26
CADM4	sLGR5_female	0.274	0.140619281165361	0.267857142857143	0.149716936088943	sLGR5_male	0.520328427757544	1.89900886042899	2.01633425205111e-24
ITCH	sLGR5_female	0.411	0.272527633408974	0.478	0.281972580315122	granulosa	0.520303578181282	1.26594544569655	2.03727057752211e-18
WDR45	sLGR5_female	0.392	0.256276992899495	0.457142857142857	0.26553441102244	sLGR5_male	0.519796248624501	1.32601083832781	3.00749873861629e-18
PTPRK	sLGR5_female	0.271	0.137910841080448	0.314285714285714	0.146988609235386	sLGR5_male	0.519615449701513	1.91740018340042	1.313337741731e-24
CMIP	sLGR5_female	0.576	0.393529024229559	0.709	0.40597503580929	preGC_IIb	0.519243039028994	0.901463609425337	1.2482451476462e-27
GHRL	sLGR5_female	0.139	0.0154454285923432	0.113	0.0238728599686242	preGC_I	0.519166811372218	3.73501303145481	2.04514414271806e-69
STX12	sLGR5_female	0.33	0.198667740282556	0.365	0.207625673555692	preGC_I	0.518766094095707	1.57201846695669	1.51762722782794e-19
PLOD2	sLGR5_female	0.538	0.369811873215724	0.589285714285714	0.381283677784599	sLGR5_male	0.518745851446547	0.96421161978912	6.89608920937684e-24
DPYSL2	sLGR5_female	0.322	0.190762023277945	0.349	0.199713525680377	Sertoli_WFDC2	0.518700562095974	1.61087131085706	5.9250116240505e-20
KCNIP4	sLGR5_female	0.296	0.164482834345948	0.396	0.17345337971489	preGC_IIb	0.518546540472779	1.75184642051615	9.34118902469811e-22
CCDC25	sLGR5_female	0.44	0.298148012590586	0.469	0.307823477252575	Sertoli_WFDC2	0.518420665888956	1.17822878611126	1.48316401413802e-18
PRKRA	sLGR5_female	0.483	0.331600907693434	0.507142857142857	0.341927562922038	sLGR5_male	0.51833452606991	1.07315636867476	3.63185146946993e-20
GPCPD1	sLGR5_female	0.353	0.221506478295879	0.34	0.230475410954232	preGC_IIb	0.518066718026063	1.46761109922397	1.68693485584872e-18
ARID2	sLGR5_female	0.331	0.200131761950077	0.283	0.209058045153809	sKITLG	0.518062444734992	1.56514333756795	2.42334366787767e-19
TBRG1	sLGR5_female	0.421	0.282702583998243	0.421428571428571	0.292135597844622	sLGR5_male	0.518056164703938	1.23053720832289	4.3085177523821e-18
PCGF2	sLGR5_female	0.344	0.212868750457507	0.353	0.221812973194189	coelEpi	0.518036726053074	1.50592071527056	8.61238110135034e-19
RAB34	sLGR5_female	0.607	0.412707708074079	0.747	0.425960030011595	coelEpi	0.518019726370802	0.853409763378587	4.4484490469528e-31
ZNF326	sLGR5_female	0.505	0.348144352536418	0.469	0.358843189414092	sKITLG	0.517559241024766	1.02486978420746	3.03927755078755e-21
SMNDC1	sLGR5_female	0.506	0.348876363370178	0.514285714285714	0.35959347929882	sLGR5_male	0.517527241536496	1.02278110975592	2.66674120681474e-21
ORAI3	sLGR5_female	0.353	0.222018885879511	0.425	0.230952868153605	preGC_I	0.51733619300555	1.46554162324518	2.40098642781096e-18
CFI	sLGR5_female	0.597	0.407656833321133	0.552	0.42057158447582	Sertoli_WFDC2	0.517085924762825	0.866140577492169	1.41938220854059e-29
CHMP1B	sLGR5_female	0.373	0.241197569724032	0.442857142857143	0.250187572471182	sLGR5_male	0.516808043505592	1.38554435256191	8.31635106167966e-18
RAP2C	sLGR5_female	0.306	0.176121806602738	0.318	0.184980560671168	preGC_I	0.516376388284661	1.68750453687798	1.81398580223839e-20
GABARAPL1	sLGR5_female	0.311	0.18124588243906	0.367857142857143	0.190096173521588	sLGR5_male	0.516330024279914	1.66022515845632	4.14981535257026e-20
HMGCR	sLGR5_female	0.366	0.235121879803821	0.432142857142857	0.244048837050679	sLGR5_male	0.516201613404274	1.4103869218696	8.39704723815256e-18
DSP	sLGR5_female	0.326	0.196691311031403	0.567	0.205511220244185	Sertoli_WFDC2	0.515815014859396	1.58225464680796	4.13893062475103e-19
ST14	sLGR5_female	0.17	0.0392357806895542	0.242	0.048154968965282	sPAX8e	0.515666261235654	3.03333094844502	3.28010655675759e-49
GPX7	sLGR5_female	0.484	0.334382548861723	0.463	0.344587681604256	preGC_I	0.515656843994455	1.06540670246788	1.11722930594312e-19
TRANK1	sLGR5_female	0.356	0.226264548715321	0.404	0.235113566605279	preGC_I	0.515376436514018	1.4476866194214	7.32980957251109e-18
PCBP4	sLGR5_female	0.186	0.0535831930312569	0.289285714285714	0.0626151012891344	sLGR5_male	0.515359275929106	2.77074879531777	1.89285908458623e-42
STARD3NL	sLGR5_female	0.403	0.269379986823805	0.496428571428571	0.278493963576836	sLGR5_male	0.515178634531332	1.27835889461869	2.42253222519742e-17
PPP1R2	sLGR5_female	0.424	0.287387453334309	0.446428571428571	0.29670554532433	sLGR5_male	0.515166386226747	1.21501506185553	1.43566438858752e-17
AIF1L	sLGR5_female	0.362	0.232486640802284	0.347	0.241320510197122	sKITLG	0.514629810661109	1.42162931121853	1.45027362715778e-17
TMEM181	sLGR5_female	0.31	0.181392284605812	0.443	0.190164381692927	Sertoli_WFDC2	0.514558588357934	1.65986641405785	8.74875283689753e-20
HIST3H2A	sLGR5_female	0.43	0.292877534587512	0.553	0.302230407202783	sKITLG	0.514523214337673	1.19656561473878	1.48286368480107e-17
RBM4	sLGR5_female	0.524	0.363662982212137	0.601	0.374599276993384	Sertoli_WFDC2	0.514514771582411	0.981898419050403	6.77944951062502e-22
TP53I3	sLGR5_female	0.281	0.151672644755142	0.292857142857143	0.160493827160494	sLGR5_male	0.514089443016263	1.8294997972109	4.0248077395239e-22
TOX4	sLGR5_female	0.448	0.307956957762975	0.535714285714286	0.317509037582702	sLGR5_male	0.51396755030974	1.1472489962271	6.68936605796229e-18
MARCH7	sLGR5_female	0.375	0.245223629309714	0.324	0.254075438237501	preGC_I	0.513796520671727	1.3701240551246	3.5609810709212e-17
GNPDA1	sLGR5_female	0.52	0.361540150794232	0.553571428571429	0.372348407339199	sLGR5_male	0.513721147761384	0.987925284156507	1.90744939380147e-21
ETNK1	sLGR5_female	0.411	0.277651709245297	0.442857142857143	0.286747152308847	sLGR5_male	0.513402480569925	1.24915445394142	4.72609995598833e-17
PCMT1	sLGR5_female	0.513	0.357001683624918	0.489285714285714	0.367642043516813	sLGR5_male	0.513331152804069	1.00064552203522	6.89149982246582e-21
GPRC5B	sLGR5_female	0.315	0.187321572359271	0.73	0.196030284428074	Sertoli_WFDC2	0.513288127579278	1.62948611929929	3.47728373791838e-19
PSMD1	sLGR5_female	0.465	0.321865163604421	0.507142857142857	0.33162812904986	sLGR5_male	0.513239579443921	1.1037410310622	2.40098642781096e-18
UBE2A	sLGR5_female	0.458	0.316448283434595	0.437	0.326103267171407	Sertoli_WFDC2	0.51320785920897	1.12054117731216	4.42421643320122e-18
ECHDC1	sLGR5_female	0.412	0.278749725495937	0.475	0.287838483050269	sLGR5_male	0.513086580910181	1.24535577890821	5.3249742510644e-17
MNAT1	sLGR5_female	0.364	0.235487885220701	0.345	0.244253461564695	sKITLG	0.513075769002099	1.40954881593983	3.28645697769801e-17
C9orf84	sLGR5_female	0.164	0.0349901178537442	0.125	0.0437896459995908	sLGR5_male	0.513050692688722	3.1283578822483	4.21931349404435e-51
CTSL	sLGR5_female	0.71	0.469072542273626	0.646	0.485505763590478	preGC_I	0.51302052510637	0.722564119868127	3.20530053606696e-48
SATB1	sLGR5_female	0.284	0.155625503257448	0.278571428571429	0.164381692926813	sLGR5_male	0.512780221284812	1.80556415945356	1.62632177266625e-21
LPP	sLGR5_female	0.514	0.358172900958934	0.531	0.368801582429575	preGC_I	0.512713199229917	0.99749649655626	7.91512049738556e-21
TRIM24	sLGR5_female	0.362	0.233950662469805	0.392857142857143	0.2426846736239	sLGR5_male	0.512589219011919	1.41599231771248	3.74084185543826e-17
AKAP7	sLGR5_female	0.26	0.130444330576093	0.233595800524934	0.139281085874088	FetalLeydig-like	0.51252790867555	1.97126118721365	3.00233668764838e-24
CCAR1	sLGR5_female	0.575	0.398140692482249	0.601	0.410203942432303	sKITLG	0.512382972874129	0.89110082238979	5.71001442858489e-26
AC022075.1	sLGR5_female	0.565	0.391991801478662	0.9	0.403792374326444	sLGR5_male	0.51237276880402	0.906854458060213	6.05702888024283e-25
TMEM165	sLGR5_female	0.453	0.313154234682673	0.446428571428571	0.322692858604461	sLGR5_male	0.512367602569124	1.13105431030712	9.58860838566802e-18
DHX30	sLGR5_female	0.609	0.418124588243906	0.576	0.431143851033354	preGC_IIb	0.512359911430773	0.841313483465966	5.41372703067579e-30
COPB2	sLGR5_female	0.533	0.371495498133372	0.639285714285714	0.382511424868699	sLGR5_male	0.512211271600306	0.960996757223839	4.31680699016376e-22
ZNF84	sLGR5_female	0.383	0.253934558231462	0.342857142857143	0.262737875997545	sLGR5_male	0.511917192186755	1.33659841302025	1.00964841219819e-16
LIMCH1	sLGR5_female	0.246	0.115950516067638	0.289	0.124820953550235	Sertoli	0.511895235265288	2.0808749401028	3.48343730987161e-26
RELN	sLGR5_female	0.349	0.222018885879511	0.598	0.230680035468249	preGC_IIb	0.511886556111429	1.46672365647974	2.39222952820082e-17
TNPO1	sLGR5_female	0.465	0.323255984188566	0.575	0.3329240843053	sLGR5_male	0.511425967373769	1.09984079005112	5.39429440032426e-18
APEH	sLGR5_female	0.382	0.25342215064783	0.417857142857143	0.262192210626833	sLGR5_male	0.511374772853967	1.33867741584808	1.26740908047615e-16
MRPS16	sLGR5_female	0.525	0.366810628797306	0.487	0.377600436532297	sKITLG	0.511307311536399	0.973918688640759	2.64130884912556e-21
SDHAF3	sLGR5_female	0.397	0.267110753239148	0.396	0.275970261237296	preGC_IIb	0.511122480779598	1.28746216821057	1.5711178726274e-16
JPX	sLGR5_female	0.598	0.412780909157456	0.597	0.425414364640884	preGC_IIb	0.511105582428461	0.854691609412142	2.63393445494981e-28
ST5	sLGR5_female	0.508	0.355391259790645	0.579	0.365800422890662	preGC_I	0.510879032573312	1.00566738695534	4.57427442713568e-20
FANCL	sLGR5_female	0.324	0.1982285337823	0.299	0.206807175499625	Sertoli_WFDC2	0.510613774293025	1.575968439176	4.18290906159883e-18
ARL6IP6	sLGR5_female	0.462	0.321572359270917	0.447	0.331150671850488	preGC_I	0.510593994008332	1.10518180521284	1.0252520378953e-17
CPSF6	sLGR5_female	0.46	0.32003513652002	0.462	0.329581883909692	sKITLG	0.510568005308862	1.10993044632361	1.22958103534524e-17
SMAD5	sLGR5_female	0.489	0.342068662616207	0.485	0.352090580451538	sKITLG	0.510450867967596	1.04386680565971	6.78721405532304e-19
ELP6	sLGR5_female	0.444	0.307444550179343	0.485714285714286	0.316758747697974	sLGR5_male	0.510428990345494	1.14961484312048	4.25792695083569e-17
AC090204.1	sLGR5_female	0.242	0.11258326623234	0.264285714285714	0.121410544983289	sLGR5_male	0.510275765321816	2.10857754265213	2.00465476877513e-26
PMAIP1	sLGR5_female	0.196	0.0652953663714223	0.162	0.0742104904167519	preGC_I	0.509766552670386	2.60084975852238	3.91605769250857e-37
ISL1	sLGR5_female	0.116	0.00475807041944221	0.114285714285714	0.0123456790123457	sLGR5_male	0.509756101942003	4.39444915467244	6.2400407847944e-88
LBX2	sLGR5_female	0.148	0.0234975477637069	0.198	0.0319896323579565	preGC_I	0.509466825788814	3.44234341749199	1.18821953051457e-58
[truncated: 5,508 more rows]

## Sheet: 2_sLGR5_sexuallyDimorphicGenes
p_val	avg_log2FC	pct.1	pct.2	p_val_adj	cluster	gene
4.80146e-268	2.55173	0.961	0	1.35545e-263	sLGR5_male	RPS4Y1
3.47671e-91	0.681838	0.425	0	9.81476e-87	sLGR5_male	SRY
5.01901e-81	0.554462	0.382	0	1.41687e-76	sLGR5_male	DDX3Y
4.61418e-76	0.548752	0.361	0	1.30258e-71	sLGR5_male	TTTY15
9.27502e-65	0.654662	0.975	0.917	2.61834e-60	sLGR5_male	SLC25A6
2.17898e-62	0.477646	0.3	0	6.15127e-58	sLGR5_male	UTY
4.89988e-62	0.821044	0.939	0.746	1.38324e-57	sLGR5_male	ODC1
4.91766e-62	0.654672	0.979	0.911	1.38825e-57	sLGR5_male	PCBP1
8.15055e-61	0.408305	0.293	0	2.3009e-56	sLGR5_male	EIF1AY
1.32484e-55	0.806808	0.9	0.565	3.74003e-51	sLGR5_male	AC022075.1
3.57758e-55	0.75608	0.871	0.64	1.00995e-50	sLGR5_male	CD99
4.09252e-51	0.535638	0.986	0.945	1.15532e-46	sLGR5_male	HNRNPDL
9.20063e-51	0.364745	0.246	0	2.59734e-46	sLGR5_male	KDM5D
1.90825e-50	0.959448	0.936	0.754	5.38698e-46	sLGR5_male	DDIT4
4.59238e-45	0.803531	0.686	0.292	1.29643e-40	sLGR5_male	MIR503HG
4.2641e-42	0.563445	0.386	0.071	1.20376e-37	sLGR5_male	GPC3
1.51242e-40	0.384928	0.996	0.997	4.26957e-36	sLGR5_male	HNRNPA1
1.93297e-40	0.52845	0.982	0.935	5.45678e-36	sLGR5_male	RPL21
5.2145e-35	0.676762	0.607	0.274	1.47205e-30	sLGR5_male	SVIL
4.59708e-34	0.58328	0.493	0.173	1.29775e-29	sLGR5_male	AC123912.4
5.43661e-34	0.647784	0.861	0.573	1.53476e-29	sLGR5_male	STAR
1.02892e-31	0.508004	0.975	0.851	2.90463e-27	sLGR5_male	ENO1
7.9663e-31	0.574608	0.521	0.177	2.24889e-26	sLGR5_male	NEDD9
4.82532e-30	0.557827	0.754	0.452	1.36219e-25	sLGR5_male	MAP1B
2.07176e-29	0.609057	0.829	0.605	5.84858e-25	sLGR5_male	H1FX
1.36632e-28	0.619931	0.325	0.084	3.85712e-24	sLGR5_male	SFRP1
1.54754e-28	0.584465	0.725	0.4	4.3687e-24	sLGR5_male	ACSM3
5.16513e-28	0.444304	0.946	0.835	1.45812e-23	sLGR5_male	KHDRBS1
4.48027e-27	0.390674	0.964	0.928	1.26478e-22	sLGR5_male	SLC25A3
5.05492e-27	0.661316	0.632	0.383	1.42701e-22	sLGR5_male	SLC2A1
7.2541e-26	0.537334	0.532	0.187	2.04783e-21	sLGR5_male	GFRA3
1.17008e-25	0.353291	1	0.996	3.30315e-21	sLGR5_male	ACTG1
4.3044e-25	0.360344	0.296	0.071	1.21513e-20	sLGR5_male	KCTD15
5.55215e-25	0.597066	0.9	0.697	1.56737e-20	sLGR5_male	IGFBP2
2.73098e-24	0.407609	0.35	0.114	7.70954e-20	sLGR5_male	FAM122B
3.9923e-24	0.435649	0.914	0.749	1.12703e-19	sLGR5_male	VCP
7.86306e-24	0.482287	0.825	0.683	2.21974e-19	sLGR5_male	SMS
9.36576e-24	0.542502	0.729	0.534	2.64395e-19	sLGR5_male	CCND2
1.60317e-23	0.553715	0.975	0.955	4.52574e-19	sLGR5_male	BEX1
2.49755e-23	0.471607	0.761	0.526	7.0506e-19	sLGR5_male	TRIM28
1.2359e-22	0.597261	0.657	0.474	3.48894e-18	sLGR5_male	CADM1
1.25333e-22	0.505634	0.721	0.503	3.53816e-18	sLGR5_male	SMARCA4
1.47016e-22	0.579103	0.775	0.561	4.15025e-18	sLGR5_male	HMGCS1
1.71894e-22	0.39517	0.95	0.904	4.85256e-18	sLGR5_male	PTMS
5.45072e-22	0.541654	0.689	0.411	1.53874e-17	sLGR5_male	NRK
1.59005e-21	0.529799	0.686	0.444	4.48871e-17	sLGR5_male	G6PD
2.10418e-21	0.437434	0.839	0.649	5.9401e-17	sLGR5_male	SLC3A2
3.85471e-21	0.379803	0.914	0.817	1.08818e-16	sLGR5_male	PTOV1
5.2645e-21	0.426438	0.514	0.245	1.48617e-16	sLGR5_male	EFNB1
1.38957e-20	0.359068	0.982	0.993	3.92277e-16	sLGR5_male	RPS2
1.39085e-20	0.641852	0.911	0.79	3.92636e-16	sLGR5_male	MEG3
1.3918e-20	0.453845	0.561	0.331	3.92906e-16	sLGR5_male	PJA1
1.39185e-20	0.482716	0.579	0.303	3.9292e-16	sLGR5_male	AMOT
4.79e-20	0.345497	0.964	0.901	1.35222e-15	sLGR5_male	DDX24
4.91409e-20	0.517789	0.261	0.063	1.38725e-15	sLGR5_male	SOX9
5.00489e-20	0.383388	0.211	0.043	1.41288e-15	sLGR5_male	HBE1
7.80655e-20	0.400643	0.304	0.096	2.20379e-15	sLGR5_male	HK2
9.78978e-20	0.323661	0.246	0.068	2.76365e-15	sLGR5_male	IGDCC3
1.68122e-19	0.412914	0.5	0.235	4.74608e-15	sLGR5_male	GPC6
1.69076e-19	0.48596	0.543	0.292	4.77303e-15	sLGR5_male	FHOD3
2.79933e-19	0.513622	0.521	0.301	7.9025e-15	sLGR5_male	WLS
3.36207e-19	0.431262	0.832	0.679	9.49113e-15	sLGR5_male	HNRNPM
3.46554e-19	0.400485	0.979	0.985	9.78321e-15	sLGR5_male	MT-ND5
8.03707e-19	0.62843	0.7	0.478	2.26887e-14	sLGR5_male	GSTA1
1.05596e-18	0.42053	0.875	0.736	2.98098e-14	sLGR5_male	PGAM1
2.52967e-18	0.346281	0.993	0.997	7.14126e-14	sLGR5_male	MT-ND4L
3.91596e-18	0.29689	0.979	0.955	1.10548e-13	sLGR5_male	HNRNPK
9.23409e-18	0.483811	0.571	0.368	2.60678e-13	sLGR5_male	KAZN
1.01374e-17	0.440829	0.918	0.79	2.8618e-13	sLGR5_male	LDHA
1.79743e-17	0.3016	0.218	0.05	5.07414e-13	sLGR5_male	LDB2
2.18203e-17	0.523737	0.768	0.603	6.15988e-13	sLGR5_male	MSMO1
2.74069e-17	0.227521	1	1	7.73696e-13	sLGR5_male	EEF1A1
2.77945e-17	0.439237	0.65	0.468	7.84639e-13	sLGR5_male	BASP1
3.36627e-17	0.381574	0.471	0.232	9.50299e-13	sLGR5_male	HMGA1
3.71824e-17	0.398711	0.436	0.205	1.04966e-12	sLGR5_male	GLUD2
5.01651e-17	0.359144	0.889	0.79	1.41616e-12	sLGR5_male	RHOBTB3
5.115e-17	0.42764	0.439	0.218	1.44396e-12	sLGR5_male	APCDD1L
6.73451e-17	0.430328	0.271	0.074	1.90115e-12	sLGR5_male	ADM
8.11588e-17	0.424107	0.793	0.628	2.29111e-12	sLGR5_male	CRABP2
1.39261e-16	0.383364	0.318	0.103	3.93133e-12	sLGR5_male	HERC5
1.44888e-16	0.292691	0.971	0.975	4.09018e-12	sLGR5_male	LDHB
1.48786e-16	0.34747	0.929	0.853	4.20022e-12	sLGR5_male	PKM
2.79395e-16	0.422491	0.957	0.934	7.88731e-12	sLGR5_male	IGF2-1
3.08195e-16	0.404336	0.686	0.472	8.70033e-12	sLGR5_male	IRF2BP2
3.97286e-16	0.464109	0.596	0.391	1.12154e-11	sLGR5_male	HPCAL1
4.64889e-16	0.261277	0.986	0.989	1.31238e-11	sLGR5_male	PCBP2
4.9797e-16	0.351173	0.375	0.16	1.40577e-11	sLGR5_male	SIAH2
6.62638e-16	0.302612	0.254	0.081	1.87063e-11	sLGR5_male	CNR1
7.40872e-16	0.378212	0.686	0.478	2.09148e-11	sLGR5_male	TEAD2
7.57784e-16	0.341377	0.75	0.559	2.13922e-11	sLGR5_male	HNRNPL
1.09098e-15	0.402979	0.718	0.532	3.07983e-11	sLGR5_male	MLLT11
1.11329e-15	0.315852	0.918	0.76	3.14283e-11	sLGR5_male	SERPINE2
2.28676e-15	0.417959	0.839	0.655	6.45553e-11	sLGR5_male	PLAC1
3.6154e-15	0.339706	0.375	0.145	1.02063e-10	sLGR5_male	TMEFF1
4.88547e-15	0.383701	0.546	0.321	1.37917e-10	sLGR5_male	HMGA2
6.59316e-15	0.357132	0.568	0.355	1.86125e-10	sLGR5_male	GRAMD1A
7.23733e-15	0.271936	0.989	0.999	2.0431e-10	sLGR5_male	NPM1
7.83169e-15	0.438792	0.861	0.769	2.21089e-10	sLGR5_male	GADD45G
9.1494e-15	0.321211	0.639	0.427	2.58288e-10	sLGR5_male	ZFAND3
1.31635e-14	0.362457	0.404	0.192	3.71605e-10	sLGR5_male	SLC16A3
1.38826e-14	0.342737	0.629	0.413	3.91906e-10	sLGR5_male	KDM1A
1.40568e-14	0.32208	0.889	0.776	3.96824e-10	sLGR5_male	RBMX
1.4592e-14	0.379938	0.471	0.282	4.11934e-10	sLGR5_male	REPS1
1.55794e-14	0.377822	0.654	0.474	4.39807e-10	sLGR5_male	PAPSS1
1.98316e-14	0.327104	0.343	0.155	5.59847e-10	sLGR5_male	PCSK6
3.02054e-14	0.269809	0.286	0.107	8.52699e-10	sLGR5_male	GPSM1
3.23253e-14	0.258678	0.982	0.998	9.12543e-10	sLGR5_male	EIF1
3.50803e-14	0.350083	0.382	0.194	9.90317e-10	sLGR5_male	DAZAP1
3.67498e-14	0.366777	0.457	0.244	1.03745e-09	sLGR5_male	SCD
4.85886e-14	0.31432	0.325	0.138	1.37166e-09	sLGR5_male	TBC1D8
4.9377e-14	0.262278	0.961	0.894	1.39391e-09	sLGR5_male	HNRNPA0
5.10348e-14	0.371215	0.832	0.667	1.44071e-09	sLGR5_male	TSC22D3
8.60231e-14	0.504137	0.368	0.207	2.42843e-09	sLGR5_male	HILPDA
8.84796e-14	0.391973	0.921	0.811	2.49778e-09	sLGR5_male	H1F0
8.86363e-14	0.391923	0.654	0.496	2.5022e-09	sLGR5_male	TSPAN14
1.40541e-13	0.320231	0.679	0.441	3.96747e-09	sLGR5_male	WIPF3
1.45956e-13	0.420548	0.546	0.375	4.12033e-09	sLGR5_male	PPM1K
2.0595e-13	0.269255	0.971	0.955	5.81397e-09	sLGR5_male	EEF2
2.13895e-13	0.275927	0.304	0.13	6.03827e-09	sLGR5_male	DCAF15
2.54639e-13	0.322802	0.671	0.446	7.18847e-09	sLGR5_male	ANKRD11
2.82625e-13	0.377658	0.675	0.467	7.97851e-09	sLGR5_male	LMO4
3.01302e-13	0.291216	0.229	0.075	8.50575e-09	sLGR5_male	CLEC4M
4.04e-13	0.326677	0.936	0.899	1.14049e-08	sLGR5_male	ALDOA
4.5933e-13	0.367937	0.907	0.84	1.29669e-08	sLGR5_male	NR2F2
4.65865e-13	0.337026	0.786	0.604	1.31514e-08	sLGR5_male	STRA6
5.04193e-13	0.437946	0.425	0.232	1.42334e-08	sLGR5_male	VEGFA
5.36533e-13	0.320366	0.868	0.757	1.51463e-08	sLGR5_male	DBN1
5.57237e-13	0.311025	0.511	0.309	1.57308e-08	sLGR5_male	PABPC4
6.54885e-13	0.224358	0.204	0.059	1.84874e-08	sLGR5_male	AMIGO2
8.60792e-13	0.339472	0.582	0.339	2.43002e-08	sLGR5_male	MMD
9.18356e-13	0.331179	0.379	0.19	2.59252e-08	sLGR5_male	PDZRN3
1.19579e-12	0.3006	0.875	0.777	3.37573e-08	sLGR5_male	SFPQ
1.27224e-12	0.44931	0.911	0.866	3.59154e-08	sLGR5_male	HSPA5
1.36085e-12	0.331582	0.343	0.187	3.84169e-08	sLGR5_male	MCM5
1.46066e-12	0.305454	0.375	0.198	4.12345e-08	sLGR5_male	KCNN1
1.46408e-12	0.302736	0.575	0.366	4.13309e-08	sLGR5_male	CTDSP2
1.50327e-12	0.341627	0.854	0.803	4.24374e-08	sLGR5_male	EIF3L
1.54073e-12	0.297165	0.554	0.321	4.34948e-08	sLGR5_male	TMEM259
1.87905e-12	0.344233	0.493	0.291	5.30454e-08	sLGR5_male	TAGLN2
2.16072e-12	0.319714	0.864	0.718	6.09971e-08	sLGR5_male	ILF3
2.19347e-12	0.328368	0.536	0.34	6.19217e-08	sLGR5_male	PLIN2
2.56486e-12	0.511672	0.629	0.422	7.2406e-08	sLGR5_male	IGFBP5
3.06389e-12	0.286513	0.925	0.867	8.64935e-08	sLGR5_male	HDAC2
4.14723e-12	0.324501	0.9	0.764	1.17076e-07	sLGR5_male	KDM5B
5.29141e-12	0.290084	0.318	0.154	1.49377e-07	sLGR5_male	SSFA2
5.83357e-12	0.346207	0.611	0.405	1.64682e-07	sLGR5_male	CYP51A1
6.81959e-12	0.310607	0.861	0.735	1.92517e-07	sLGR5_male	USP22
7.99566e-12	0.306809	0.618	0.423	2.25718e-07	sLGR5_male	PRCP
1.3262e-11	0.285098	0.879	0.767	3.74387e-07	sLGR5_male	SNRNP70
1.36496e-11	0.351787	0.779	0.648	3.85327e-07	sLGR5_male	AFF4
1.45753e-11	0.280417	0.818	0.676	4.1146e-07	sLGR5_male	NDN
1.61995e-11	0.254658	0.921	0.866	4.57311e-07	sLGR5_male	ARF1
1.62604e-11	0.503551	0.464	0.268	4.5903e-07	sLGR5_male	DLK1
2.10866e-11	0.310014	0.761	0.625	5.95276e-07	sLGR5_male	EWSR1
2.22842e-11	0.371542	0.511	0.348	6.29084e-07	sLGR5_male	NR2F2-AS1
2.3782e-11	0.326737	0.411	0.262	6.71365e-07	sLGR5_male	PSME4
2.53992e-11	0.258814	0.3	0.133	7.17019e-07	sLGR5_male	LARP6
2.59113e-11	0.335479	0.439	0.269	7.31475e-07	sLGR5_male	CUL4B
3.6495e-11	0.248871	0.918	0.837	1.03025e-06	sLGR5_male	PABPC1
3.84934e-11	0.274843	0.807	0.671	1.08667e-06	sLGR5_male	ELAVL1
4.28678e-11	0.273248	0.846	0.745	1.21016e-06	sLGR5_male	CCT8
5.3685e-11	0.287471	0.639	0.467	1.51553e-06	sLGR5_male	WDR33
5.89893e-11	0.384503	0.5	0.315	1.66527e-06	sLGR5_male	GPRC5B
7.18304e-11	0.231507	0.957	0.886	2.02777e-06	sLGR5_male	MAGED2
7.58988e-11	0.381735	0.611	0.442	2.14262e-06	sLGR5_male	SLC2A3
7.84612e-11	0.247798	0.279	0.115	2.21496e-06	sLGR5_male	GRK6
1.05732e-10	0.284964	0.861	0.778	2.9848e-06	sLGR5_male	RTRAF
1.10113e-10	0.316334	0.364	0.206	3.10849e-06	sLGR5_male	MAPRE2
1.16586e-10	0.181106	0.975	0.946	3.29124e-06	sLGR5_male	LAPTM4B
1.51555e-10	0.340317	0.571	0.429	4.27839e-06	sLGR5_male	RDX
1.51638e-10	0.297601	0.543	0.357	4.28074e-06	sLGR5_male	NR5A1
1.63789e-10	0.250936	0.507	0.312	4.62375e-06	sLGR5_male	RHOG
1.78157e-10	0.327604	0.364	0.204	5.02938e-06	sLGR5_male	PFKFB3
1.80758e-10	0.46962	0.55	0.383	5.1028e-06	sLGR5_male	ID3
1.93164e-10	0.301871	0.511	0.333	5.45302e-06	sLGR5_male	WASF1
1.95174e-10	0.256591	0.439	0.235	5.50976e-06	sLGR5_male	NSMCE3
2.04579e-10	0.315361	0.543	0.341	5.77526e-06	sLGR5_male	GRID2
2.24799e-10	0.244145	0.914	0.853	6.34608e-06	sLGR5_male	HNRNPA3
2.27029e-10	0.281449	0.714	0.547	6.40902e-06	sLGR5_male	PSMD2
2.33648e-10	0.368824	0.793	0.672	6.59589e-06	sLGR5_male	FDFT1
2.39499e-10	0.39384	0.732	0.616	6.76105e-06	sLGR5_male	KCTD12
2.59456e-10	0.275118	0.482	0.307	7.32446e-06	sLGR5_male	TMEM206
2.73472e-10	0.218091	0.218	0.074	7.72011e-06	sLGR5_male	CPOX
3.38566e-10	0.526462	0.632	0.451	9.55772e-06	sLGR5_male	REG3G
3.39194e-10	0.307956	0.854	0.785	9.57544e-06	sLGR5_male	SRSF3
3.87491e-10	0.270311	0.907	0.851	1.09389e-05	sLGR5_male	ANP32A
3.90396e-10	0.345789	0.436	0.256	1.10209e-05	sLGR5_male	GPR37
4.33992e-10	0.304516	0.811	0.699	1.22516e-05	sLGR5_male	GLUL
4.52215e-10	0.302239	0.496	0.334	1.2766e-05	sLGR5_male	AL135925.1
5.5497e-10	0.261477	0.896	0.832	1.56668e-05	sLGR5_male	XRCC6
5.84778e-10	0.284538	0.664	0.504	1.65083e-05	sLGR5_male	PTBP1
6.26872e-10	0.307746	0.475	0.299	1.76966e-05	sLGR5_male	ZFHX3
7.51561e-10	0.247606	0.379	0.206	2.12166e-05	sLGR5_male	MRGBP
8.61679e-10	0.211105	0.989	0.955	2.43252e-05	sLGR5_male	HSP90AA1
1.05454e-09	0.314889	0.475	0.307	2.97697e-05	sLGR5_male	SLC29A1
1.075e-09	0.19255	0.204	0.08	3.03471e-05	sLGR5_male	GNG3
1.09817e-09	0.210857	0.257	0.115	3.10013e-05	sLGR5_male	PDK3
1.33676e-09	0.247485	0.461	0.281	3.77366e-05	sLGR5_male	PRRT1
1.36904e-09	0.28949	0.671	0.523	3.86479e-05	sLGR5_male	HMGB2
1.44922e-09	0.286616	0.65	0.499	4.09114e-05	sLGR5_male	SF3A2
1.81325e-09	0.285613	0.839	0.778	5.11881e-05	sLGR5_male	SF3B2
2.00883e-09	0.247045	0.786	0.649	5.67093e-05	sLGR5_male	USP11
2.03989e-09	0.330141	0.8	0.671	5.7586e-05	sLGR5_male	ZNF431
2.13163e-09	0.252261	0.271	0.146	6.01759e-05	sLGR5_male	PTTG1
2.15288e-09	0.267128	0.414	0.268	6.07759e-05	sLGR5_male	ROBO1
2.20476e-09	0.334238	0.607	0.466	6.22403e-05	sLGR5_male	CHD4
2.37363e-09	0.351784	0.914	0.895	6.70075e-05	sLGR5_male	CALR
2.96178e-09	0.263849	0.246	0.116	8.3611e-05	sLGR5_male	THSD7B
2.98616e-09	0.671365	0.357	0.276	8.42993e-05	sLGR5_male	VCAN
3.37544e-09	0.226902	0.279	0.131	9.52886e-05	sLGR5_male	IL17B
3.51617e-09	0.289353	0.643	0.503	9.92615e-05	sLGR5_male	DHX36
3.80494e-09	0.298314	0.686	0.519	0.000107414	sLGR5_male	SQLE
4.53825e-09	0.245264	0.404	0.246	0.000128115	sLGR5_male	PCGF3
5.2057e-09	0.275595	0.321	0.191	0.000146957	sLGR5_male	ABCC1
6.74364e-09	0.210456	0.996	0.999	0.000190373	sLGR5_male	H3F3B
7.2405e-09	0.266302	0.5	0.332	0.000204399	sLGR5_male	IGF2BP1
7.25384e-09	0.250366	0.504	0.332	0.000204776	sLGR5_male	HDGFL2
7.4212e-09	0.347185	0.496	0.351	0.0002095	sLGR5_male	COL2A1
7.76232e-09	0.264009	0.379	0.239	0.00021913	sLGR5_male	JAM2
9.00853e-09	0.223599	0.268	0.136	0.000254311	sLGR5_male	SDC2
9.13669e-09	0.222227	0.336	0.167	0.000257929	sLGR5_male	PGRMC2
9.72099e-09	0.220024	0.496	0.299	0.000274424	sLGR5_male	RNF187
9.83454e-09	0.19423	0.236	0.101	0.000277629	sLGR5_male	FZD2
1.00836e-08	0.22977	0.918	0.862	0.000284661	sLGR5_male	EIF3F
1.02523e-08	0.248098	0.332	0.191	0.000289422	sLGR5_male	JPH4
1.06695e-08	0.25984	0.436	0.265	0.0003012	sLGR5_male	CYP11A1
1.07607e-08	0.220496	0.257	0.121	0.000303776	sLGR5_male	SLCO3A1
1.1752e-08	0.118742	0.914	0.735	0.000331759	sLGR5_male	DNAJB1
1.21528e-08	0.251553	0.475	0.309	0.000343075	sLGR5_male	CLIP3
1.31458e-08	0.228654	0.389	0.237	0.000371105	sLGR5_male	R3HDM4
1.34773e-08	0.165999	0.218	0.082	0.000380464	sLGR5_male	UQCRHL
1.36789e-08	0.201867	0.221	0.093	0.000386156	sLGR5_male	RHOU
1.58405e-08	0.221279	0.968	0.97	0.000447177	sLGR5_male	RPL4
1.78697e-08	0.247463	0.304	0.164	0.000504463	sLGR5_male	MICAL1
1.79817e-08	0.232704	0.689	0.536	0.000507622	sLGR5_male	HNRNPUL1
1.85143e-08	0.251913	0.629	0.473	0.000522658	sLGR5_male	PTP4A1
1.92573e-08	0.252741	0.829	0.72	0.000543633	sLGR5_male	GATA4
2.04797e-08	0.181869	0.989	0.983	0.000578143	sLGR5_male	HNRNPA2B1
2.07366e-08	0.239996	0.918	0.875	0.000585395	sLGR5_male	ZFAS1
2.26675e-08	0.232948	0.971	0.974	0.000639904	sLGR5_male	ATP5MC2
2.35803e-08	0.241195	0.475	0.317	0.000665673	sLGR5_male	HSF2
2.99674e-08	0.229061	0.325	0.192	0.000845978	sLGR5_male	CTNNBL1
3.30938e-08	0.217866	0.511	0.343	0.000934238	sLGR5_male	MTA3
3.35185e-08	0.288414	0.346	0.213	0.000946226	sLGR5_male	NR0B1
3.51971e-08	0.217314	0.271	0.145	0.000993615	sLGR5_male	ZNF71
4.55274e-08	0.259397	0.554	0.418	0.00128524	sLGR5_male	KPNA2
4.58999e-08	0.239088	0.482	0.328	0.00129575	sLGR5_male	AK3
4.62153e-08	0.215037	0.379	0.227	0.00130466	sLGR5_male	RNF126
5.0733e-08	0.249027	0.632	0.473	0.00143219	sLGR5_male	PRPF8
5.4231e-08	0.22285	0.518	0.357	0.00153094	sLGR5_male	CSNK1D
5.4879e-08	0.287361	0.382	0.254	0.00154923	sLGR5_male	CAMSAP3
6.1979e-08	0.233304	0.943	0.934	0.00174967	sLGR5_male	TUBA1B
6.853e-08	0.254136	0.275	0.156	0.0019346	sLGR5_male	TMEM132A
7.59091e-08	0.210104	0.429	0.261	0.00214291	sLGR5_male	E2F4
8.18817e-08	0.220417	0.832	0.739	0.00231152	sLGR5_male	ATXN10
8.54297e-08	0.276322	0.429	0.29	0.00241168	sLGR5_male	CHD3
8.99493e-08	0.256465	0.536	0.374	0.00253927	sLGR5_male	AC112487.1
9.05314e-08	0.274299	0.543	0.423	0.0025557	sLGR5_male	RNF146
9.48239e-08	0.215976	0.393	0.251	0.00267688	sLGR5_male	HGS
1.0494e-07	0.22312	0.468	0.325	0.00296246	sLGR5_male	SLC35B1
1.08381e-07	0.209701	0.986	0.995	0.0030596	sLGR5_male	RPL6
1.10717e-07	0.212134	0.743	0.611	0.00312555	sLGR5_male	H2AFV
1.25255e-07	0.333112	0.564	0.474	0.00353595	sLGR5_male	MANF
1.27599e-07	0.207422	0.625	0.459	0.00360212	sLGR5_male	ATF4
1.34057e-07	0.213632	0.429	0.283	0.00378444	sLGR5_male	FBXL12
1.34702e-07	0.21867	0.518	0.371	0.00380263	sLGR5_male	SAE1
1.4241e-07	0.227574	0.375	0.238	0.00402022	sLGR5_male	FASN
1.45837e-07	0.239803	0.436	0.313	0.00411698	sLGR5_male	BZW2
1.47553e-07	0.265659	0.464	0.312	0.00416542	sLGR5_male	STAM
1.51232e-07	0.310827	0.664	0.548	0.00426929	sLGR5_male	P4HA1
1.55626e-07	0.263777	0.686	0.553	0.00439332	sLGR5_male	PTS
1.68495e-07	0.252341	0.421	0.283	0.00475662	sLGR5_male	CDC42EP4
1.78854e-07	0.180871	0.264	0.132	0.00504905	sLGR5_male	DCN
1.81001e-07	0.26554	0.4	0.243	0.00510967	sLGR5_male	CXCR4
1.947e-07	0.226411	0.561	0.413	0.00549637	sLGR5_male	MKRN1
2.12094e-07	0.230621	0.393	0.258	0.00598743	sLGR5_male	NUDT11
2.15173e-07	0.25439	0.293	0.169	0.00607432	sLGR5_male	DPYSL4
2.23812e-07	0.198625	0.389	0.227	0.0063182	sLGR5_male	MTA1
2.26044e-07	0.220673	0.432	0.269	0.00638122	sLGR5_male	TRIM8
2.34133e-07	0.177647	0.229	0.118	0.00660958	sLGR5_male	NCOA2
2.50704e-07	0.237274	0.489	0.338	0.00707737	sLGR5_male	AC100810.1
2.6692e-07	0.235111	0.754	0.642	0.00753515	sLGR5_male	KPNB1
2.675e-07	0.373601	0.357	0.224	0.00755152	sLGR5_male	DNAJC15
2.6793e-07	0.224332	0.775	0.664	0.00756366	sLGR5_male	RBM3
3.1437e-07	0.234015	0.686	0.548	0.00887465	sLGR5_male	EIF3A
3.32226e-07	0.228733	1	0.999	0.00937875	sLGR5_male	MT-CO3
3.43675e-07	0.224662	0.243	0.129	0.00970194	sLGR5_male	ST3GAL6
3.46351e-07	0.21039	0.932	0.88	0.00977748	sLGR5_male	PSAP
3.57519e-07	0.238832	0.261	0.139	0.0100928	sLGR5_male	LGR5
3.63042e-07	0.216413	0.396	0.249	0.0102487	sLGR5_male	EVL
3.66383e-07	0.238439	0.296	0.178	0.010343	sLGR5_male	LAMA1
3.82006e-07	0.218086	0.55	0.408	0.010784	sLGR5_male	MED15
3.88368e-07	0.209248	0.454	0.302	0.0109636	sLGR5_male	ARF6
3.90341e-07	0.224008	0.386	0.239	0.0110193	sLGR5_male	ST6GAL1
3.99546e-07	0.231208	0.375	0.249	0.0112792	sLGR5_male	HACD1
4.2046e-07	0.21751	0.539	0.39	0.0118696	sLGR5_male	RAE1
4.21103e-07	0.208765	0.75	0.619	0.0118877	sLGR5_male	H2AFY2
4.34854e-07	0.190361	0.229	0.116	0.0122759	sLGR5_male	MTFP1
4.44154e-07	0.247267	0.425	0.283	0.0125385	sLGR5_male	PRKD1
4.54959e-07	0.257993	0.793	0.692	0.0128435	sLGR5_male	FSCN1
4.59801e-07	0.22568	0.521	0.376	0.0129802	sLGR5_male	PTK2
5.21927e-07	0.192953	0.336	0.196	0.014734	sLGR5_male	CUL3
5.3908e-07	0.276419	0.839	0.808	0.0152182	sLGR5_male	CNIH1
5.51522e-07	0.175988	0.225	0.111	0.0155695	sLGR5_male	SLC25A33
5.55692e-07	0.176652	0.218	0.112	0.0156872	sLGR5_male	UCK2
5.58323e-07	0.238759	0.693	0.587	0.0157614	sLGR5_male	EIF3D
5.80221e-07	0.230643	0.804	0.694	0.0163796	sLGR5_male	SMARCC1
5.86943e-07	0.201755	0.257	0.154	0.0165694	sLGR5_male	MAN2C1
6.37535e-07	0.193849	0.243	0.133	0.0179976	sLGR5_male	ULK1
6.40421e-07	0.250836	0.986	0.994	0.0180791	sLGR5_male	MT-ND1
6.51962e-07	0.175658	0.225	0.107	0.0184049	sLGR5_male	CHPT1
6.70841e-07	0.213031	0.875	0.821	0.0189378	sLGR5_male	CCT2
7.01558e-07	0.224188	0.354	0.217	0.019805	sLGR5_male	RCC2
7.24043e-07	0.278867	0.404	0.276	0.0204397	sLGR5_male	PNMA1
7.90839e-07	0.204455	0.893	0.834	0.0223254	sLGR5_male	ILF2
8.22473e-07	0.230686	0.368	0.263	0.0232184	sLGR5_male	KLHDC8A
8.43096e-07	0.261736	0.486	0.361	0.0238006	sLGR5_male	GOLGA8B
8.90909e-07	0.225816	0.421	0.294	0.0251504	sLGR5_male	ST6GALNAC1
9.43035e-07	0.223718	0.296	0.183	0.0266219	sLGR5_male	SLC6A8
9.65925e-07	0.225739	0.575	0.428	0.0272681	sLGR5_male	ZNF738
9.81959e-07	0.19162	0.264	0.146	0.0277207	sLGR5_male	DOK6
1.04237e-06	0.207524	0.232	0.111	0.029426	sLGR5_male	BHLHE40
1.05972e-06	0.196684	0.275	0.158	0.0299158	sLGR5_male	ATP2B4
1.14186e-06	0.231261	0.557	0.427	0.0322347	sLGR5_male	CDK16
1.26487e-06	0.20701	0.35	0.239	0.0357072	sLGR5_male	AATF
1.33338e-06	0.241812	0.579	0.45	0.0376412	sLGR5_male	GSS
1.35444e-06	0.224528	0.357	0.237	0.0382359	sLGR5_male	NUDT4
1.39027e-06	0.223898	1	0.999	0.0392472	sLGR5_male	MT-CO2
1.42778e-06	0.194956	0.611	0.465	0.0403063	sLGR5_male	MRPL47
1.43119e-06	0.200345	0.836	0.755	0.0404024	sLGR5_male	ANP32B
1.45954e-06	0.229747	0.654	0.542	0.0412028	sLGR5_male	FKBP10
1.46515e-06	0.26129	0.404	0.256	0.0413613	sLGR5_male	ID1
1.48667e-06	0.222795	0.368	0.254	0.0419686	sLGR5_male	INTS12
1.48791e-06	0.175452	0.879	0.804	0.0420037	sLGR5_male	CCT4
1.54903e-06	0.233325	0.604	0.465	0.0437293	sLGR5_male	APOBEC3C
1.55914e-06	0.194015	0.261	0.152	0.0440146	sLGR5_male	MCM2
1.74668e-06	0.189867	0.429	0.293	0.0493088	sLGR5_male	PRPF19
1.74828e-06	0.244149	0.443	0.296	0.0493541	sLGR5_male	TUBB2B
1.83763e-06	0.341257	0.904	0.898	0.0518762	sLGR5_male	WSB1
1.84864e-06	0.178013	0.214	0.126	0.0521871	sLGR5_male	OAF
1.85406e-06	0.180259	0.207	0.108	0.0523402	sLGR5_male	DAB2IP
1.89249e-06	0.285474	0.489	0.398	0.0534249	sLGR5_male	PPFIBP1
1.94894e-06	0.210242	0.354	0.23	0.0550186	sLGR5_male	AGPAT5
1.95561e-06	0.215471	0.757	0.69	0.0552069	sLGR5_male	EIF4H
1.9605e-06	0.199243	0.6	0.462	0.0553449	sLGR5_male	CHMP4B
1.97571e-06	0.193014	0.45	0.309	0.0557744	sLGR5_male	SLC44A2
2.03658e-06	0.209011	0.446	0.312	0.0574927	sLGR5_male	SREBF2
2.05771e-06	0.245864	0.543	0.411	0.0580892	sLGR5_male	AHI1
2.11295e-06	0.225775	0.204	0.117	0.0596486	sLGR5_male	ZNF385B
2.21125e-06	0.275465	0.418	0.302	0.0624235	sLGR5_male	JCAD
2.21178e-06	0.195719	0.382	0.252	0.0624385	sLGR5_male	VAPB
2.30725e-06	0.195813	0.336	0.213	0.0651337	sLGR5_male	PTDSS1
2.35762e-06	0.229478	0.461	0.347	0.0665557	sLGR5_male	TRO
2.41616e-06	0.204926	0.664	0.546	0.0682081	sLGR5_male	ANKRD10
2.63779e-06	0.245199	0.389	0.275	0.0744647	sLGR5_male	RC3H1
2.65066e-06	0.255157	0.582	0.488	0.074828	sLGR5_male	ZSCAN18
3.06687e-06	0.19467	0.211	0.121	0.0865776	sLGR5_male	LPAR1
3.43374e-06	0.195349	0.654	0.534	0.0969345	sLGR5_male	ACTR1A
3.44605e-06	0.189357	0.904	0.854	0.0972821	sLGR5_male	RAB11B
3.45025e-06	0.268078	0.925	0.918	0.0974007	sLGR5_male	PHGDH
3.47435e-06	0.214121	0.468	0.338	0.0980808	sLGR5_male	CYTH2
3.51938e-06	0.1716	0.293	0.173	0.0993521	sLGR5_male	HSD17B11
3.67539e-06	0.261992	0.475	0.367	0.103756	sLGR5_male	SYT1
3.73748e-06	0.175029	0.914	0.863	0.105509	sLGR5_male	EIF3M
4.29571e-06	0.18747	0.325	0.21	0.121268	sLGR5_male	MARK3
4.32658e-06	0.151398	0.207	0.101	0.122139	sLGR5_male	ERO1A
4.61439e-06	0.218255	0.782	0.696	0.130264	sLGR5_male	TMEM98
4.83049e-06	0.162095	0.682	0.523	0.136365	sLGR5_male	BOD1
4.88529e-06	0.151729	0.968	0.929	0.137912	sLGR5_male	FUS
4.9351e-06	0.228097	0.575	0.465	0.139318	sLGR5_male	TNPO1
5.03359e-06	0.181194	0.411	0.274	0.142098	sLGR5_male	POLB
5.10571e-06	0.174445	0.332	0.21	0.144134	sLGR5_male	PLAA
5.20662e-06	0.164945	0.214	0.111	0.146983	sLGR5_male	PRRX1
5.2107e-06	0.200342	0.432	0.303	0.147098	sLGR5_male	SPATS2
5.81615e-06	0.206147	0.546	0.407	0.16419	sLGR5_male	LSR
5.92862e-06	0.165246	0.311	0.189	0.167365	sLGR5_male	TRMT1
6.04426e-06	0.210595	0.561	0.454	0.170629	sLGR5_male	DPF2
6.13173e-06	0.191583	0.539	0.39	0.173099	sLGR5_male	NLRP1
6.52569e-06	0.192537	0.568	0.437	0.18422	sLGR5_male	DCAF7
6.57346e-06	0.203891	0.3	0.193	0.185569	sLGR5_male	SEPT11
6.59698e-06	0.203179	0.55	0.418	0.186233	sLGR5_male	DHRS7
6.63326e-06	0.30437	0.632	0.569	0.187257	sLGR5_male	UCHL1
6.79569e-06	0.183284	0.943	0.947	0.191842	sLGR5_male	HNRNPC
7.07093e-06	0.211143	0.661	0.546	0.199612	sLGR5_male	FBL
7.73676e-06	0.187854	0.625	0.499	0.218409	sLGR5_male	METTL9
8.24159e-06	0.172332	0.204	0.115	0.23266	sLGR5_male	INF2
8.65942e-06	0.190615	0.607	0.482	0.244455	sLGR5_male	WTAP
9.07627e-06	0.183951	0.386	0.264	0.256223	sLGR5_male	PLEKHO1
9.09064e-06	0.202937	0.786	0.689	0.256629	sLGR5_male	PABPN1
9.47277e-06	0.183803	0.318	0.204	0.267416	sLGR5_male	RMND5A
9.51524e-06	0.245416	0.632	0.556	0.268615	sLGR5_male	MCTS1
1.00438e-05	0.204142	0.761	0.69	0.283537	sLGR5_male	YIPF3
1.03821e-05	0.22344	0.779	0.681	0.293086	sLGR5_male	AES
1.11608e-05	0.19507	0.639	0.527	0.31507	sLGR5_male	TPM4
1.11677e-05	0.167093	0.332	0.198	0.315264	sLGR5_male	TSPYL5
1.11919e-05	0.17494	0.411	0.274	0.315948	sLGR5_male	GTF2E2
1.2177e-05	0.183756	0.221	0.127	0.343756	sLGR5_male	INSIG2
1.24084e-05	0.224879	0.457	0.329	0.35029	sLGR5_male	KNOP1
1.26247e-05	0.166474	0.236	0.137	0.356395	sLGR5_male	CSNK1G2
1.26524e-05	0.182701	0.382	0.276	0.357177	sLGR5_male	RPP30
1.28241e-05	0.172361	0.282	0.167	0.362026	sLGR5_male	SART1
1.28384e-05	0.222705	0.496	0.388	0.362429	sLGR5_male	TYRO3
1.30228e-05	0.173465	0.289	0.186	0.367634	sLGR5_male	PCBP4
1.34134e-05	0.2191	0.571	0.481	0.37866	sLGR5_male	SPSB3
1.34973e-05	0.194541	0.489	0.361	0.381027	sLGR5_male	RERE
1.35996e-05	0.195044	0.264	0.155	0.383916	sLGR5_male	KDM4B
1.39436e-05	0.186724	0.418	0.296	0.393627	sLGR5_male	ATXN2L
1.42808e-05	0.211265	0.779	0.659	0.403146	sLGR5_male	KMT2E
1.45622e-05	0.182971	0.307	0.197	0.411091	sLGR5_male	FANCF
1.46189e-05	0.234053	0.307	0.205	0.412693	sLGR5_male	TAB3
1.53778e-05	0.174326	0.446	0.302	0.434114	sLGR5_male	CSKMT
1.57984e-05	0.173731	0.429	0.302	0.445989	sLGR5_male	BLOC1S4
1.62738e-05	0.182381	0.236	0.134	0.459409	sLGR5_male	RAB3A
1.67488e-05	0.207937	0.471	0.325	0.472818	sLGR5_male	ID2
1.6835e-05	0.188904	0.754	0.656	0.475252	sLGR5_male	TCF25
1.71406e-05	0.172142	0.261	0.165	0.483878	sLGR5_male	ZCCHC3
1.73297e-05	0.154242	0.261	0.15	0.489217	sLGR5_male	CLK2
1.73335e-05	0.180096	0.425	0.293	0.489326	sLGR5_male	RHOT2
1.90661e-05	0.193142	0.336	0.228	0.538235	sLGR5_male	UBN1
1.92815e-05	0.235193	0.571	0.471	0.544318	sLGR5_male	CKAP4
1.95498e-05	0.151699	0.214	0.124	0.551892	sLGR5_male	PLEKHG4B
1.96085e-05	0.198244	0.718	0.639	0.553548	sLGR5_male	SH3BGRL
1.97884e-05	0.199966	0.882	0.847	0.558628	sLGR5_male	RBM8A
1.9872e-05	0.179658	0.611	0.48	0.560987	sLGR5_male	CMTM3
2.00215e-05	0.164331	0.268	0.154	0.565206	sLGR5_male	BAZ1A
2.02033e-05	0.185345	0.443	0.317	0.570339	sLGR5_male	BCAS3
2.03558e-05	0.182953	0.621	0.504	0.574645	sLGR5_male	INTS11
2.05577e-05	0.144991	0.225	0.125	0.580343	sLGR5_male	CARM1
2.0887e-05	0.203149	0.679	0.603	0.589641	sLGR5_male	PUF60
2.25584e-05	0.199919	0.357	0.253	0.636824	sLGR5_male	CCNG2
2.26494e-05	0.203499	0.561	0.458	0.639394	sLGR5_male	PSMD3
2.30812e-05	0.176011	0.364	0.251	0.651583	sLGR5_male	TBCC
2.41897e-05	0.169465	0.586	0.48	0.682874	sLGR5_male	VPS72
2.52842e-05	0.17207	0.368	0.26	0.713773	sLGR5_male	GNL2
2.5746e-05	0.184932	0.525	0.392	0.72681	sLGR5_male	FBLN1
2.79441e-05	0.18448	0.454	0.343	0.788862	sLGR5_male	MAZ
2.81876e-05	0.177254	0.457	0.32	0.795737	sLGR5_male	PDCD7
2.83298e-05	0.191366	0.868	0.838	0.799752	sLGR5_male	EIF3H
2.84835e-05	0.164878	0.961	0.955	0.80409	sLGR5_male	UBC
2.90386e-05	0.205626	0.404	0.303	0.819759	sLGR5_male	RIMS4
2.92866e-05	0.235918	0.796	0.738	0.82676	sLGR5_male	GNAS
2.9674e-05	0.180487	0.371	0.253	0.837698	sLGR5_male	GGT7
2.98712e-05	0.183742	0.439	0.305	0.843265	sLGR5_male	EBP
2.99973e-05	0.152124	0.232	0.137	0.846824	sLGR5_male	COG5
3.049e-05	0.195839	0.914	0.834	0.860732	sLGR5_male	COL1A2
3.15857e-05	0.162871	0.536	0.377	0.891664	sLGR5_male	GNG2
3.25614e-05	0.135117	0.296	0.171	0.91921	sLGR5_male	MARK4
3.34788e-05	0.155967	0.282	0.175	0.945107	sLGR5_male	INTS8
3.36589e-05	0.256251	0.543	0.462	0.950191	sLGR5_male	OBSL1
3.39974e-05	0.189966	0.714	0.604	0.959745	sLGR5_male	XRN2
3.57135e-05	0.146086	0.254	0.153	1	sLGR5_male	ST3GAL4
3.72808e-05	0.179209	0.654	0.518	1	sLGR5_male	TMSB15A
3.76441e-05	0.147128	0.286	0.172	1	sLGR5_male	ABHD10
3.76451e-05	0.189079	0.354	0.253	1	sLGR5_male	RNF24
3.84145e-05	0.186727	0.443	0.328	1	sLGR5_male	LIMD2
3.91539e-05	0.13911	0.911	0.839	1	sLGR5_male	NONO
3.94612e-05	0.18965	0.3	0.19	1	sLGR5_male	SERTAD2
3.9859e-05	0.194351	0.386	0.248	1	sLGR5_male	ZFP36L2
4.02686e-05	0.211492	0.796	0.764	1	sLGR5_male	SMARCB1
4.02712e-05	0.2115	0.511	0.43	1	sLGR5_male	U2AF2
4.48999e-05	0.178918	0.271	0.184	1	sLGR5_male	SBK1
4.49171e-05	0.16701	0.307	0.197	1	sLGR5_male	GGA1
4.50435e-05	0.160534	0.525	0.398	1	sLGR5_male	NGDN
4.59685e-05	0.151181	0.25	0.141	1	sLGR5_male	IGF2R
4.65243e-05	0.181321	0.521	0.414	1	sLGR5_male	HDAC3
4.75128e-05	0.189685	0.811	0.758	1	sLGR5_male	HNRNPH3
4.77948e-05	0.167025	0.661	0.554	1	sLGR5_male	PSMA3
4.88827e-05	0.142685	0.243	0.134	1	sLGR5_male	C7orf26
5.06208e-05	0.182709	0.604	0.471	1	sLGR5_male	TMEM97
5.08152e-05	0.198011	0.525	0.424	1	sLGR5_male	FADS1
5.36624e-05	0.195804	0.5	0.402	1	sLGR5_male	WASHC1
5.36931e-05	0.205246	0.514	0.41	1	sLGR5_male	RALBP1
5.38949e-05	0.169759	0.436	0.315	1	sLGR5_male	MDFI
5.45215e-05	0.163969	0.443	0.3	1	sLGR5_male	SRM
5.51618e-05	0.152007	0.218	0.134	1	sLGR5_male	PYGB
5.73499e-05	0.152742	0.293	0.195	1	sLGR5_male	HMCES
5.77467e-05	0.185492	0.589	0.466	1	sLGR5_male	BAG6
6.1424e-05	0.183865	0.225	0.145	1	sLGR5_male	KCNMA1
6.17917e-05	0.164334	0.214	0.134	1	sLGR5_male	SUSD1
6.24557e-05	0.194561	0.546	0.431	1	sLGR5_male	TOMM34
6.51216e-05	0.188634	0.3	0.208	1	sLGR5_male	CUL4A
6.94373e-05	0.22645	0.554	0.482	1	sLGR5_male	PAICS
7.04891e-05	0.190352	0.443	0.345	1	sLGR5_male	C20orf96
7.09628e-05	0.194163	0.604	0.501	1	sLGR5_male	SINHCAF
7.56487e-05	0.252471	0.382	0.321	1	sLGR5_male	TOGARAM1
8.016e-05	0.162381	0.207	0.122	1	sLGR5_male	C11orf95
8.05747e-05	0.268829	0.754	0.711	1	sLGR5_male	BNIP3
8.10035e-05	0.160537	0.368	0.265	1	sLGR5_male	GLB1
8.13359e-05	0.202142	0.564	0.455	1	sLGR5_male	MAD2L2
8.40958e-05	0.169913	0.314	0.204	1	sLGR5_male	SLITRK2
8.44127e-05	0.175424	0.529	0.428	1	sLGR5_male	OS9
8.58863e-05	0.161334	0.296	0.194	1	sLGR5_male	SNAI2
8.59701e-05	0.167815	0.329	0.232	1	sLGR5_male	DCTN5
8.79305e-05	0.189524	0.386	0.294	1	sLGR5_male	PLCG1
8.84001e-05	0.199822	0.629	0.519	1	sLGR5_male	ZFAND5
9.03612e-05	0.177236	0.329	0.231	1	sLGR5_male	PARP6
9.14023e-05	0.179545	0.993	0.998	1	sLGR5_male	TUBB
9.16897e-05	0.224078	0.8	0.798	1	sLGR5_male	NME4
9.22901e-05	0.175112	0.443	0.324	1	sLGR5_male	ATP2B1-AS1
9.25869e-05	0.142471	0.225	0.135	1	sLGR5_male	PHTF1
9.2974e-05	0.155243	0.354	0.245	1	sLGR5_male	DMAC2
9.58968e-05	0.171591	0.643	0.555	1	sLGR5_male	ARPP19
9.85704e-05	0.157101	0.321	0.217	1	sLGR5_male	MGAT1
0.000100854	0.21831	0.571	0.493	1	sLGR5_male	RABGGTB
0.00010108	0.15463	0.343	0.247	1	sLGR5_male	PRAF2
0.000101802	0.163148	0.296	0.202	1	sLGR5_male	MAPRE3
0.00010187	0.195151	0.764	0.686	1	sLGR5_male	DYNC1H1
0.000102557	0.147054	0.268	0.166	1	sLGR5_male	IP6K1
0.000105527	0.15899	0.236	0.149	1	sLGR5_male	ZSWIM8
0.000106946	0.138887	0.211	0.127	1	sLGR5_male	CHST10
0.000108834	0.162205	0.364	0.256	1	sLGR5_male	DENND5B
0.000108849	0.142807	0.211	0.127	1	sLGR5_male	ZNF263
0.000109767	0.141253	0.275	0.171	1	sLGR5_male	RAB22A
0.000110988	0.175795	0.429	0.33	1	sLGR5_male	ARFGAP2
0.000112125	0.18442	0.336	0.253	1	sLGR5_male	MICAL2
0.000113059	0.170003	0.921	0.861	1	sLGR5_male	PDIA3
0.000115981	0.137695	0.275	0.178	1	sLGR5_male	FAM3A
0.000117895	0.176052	0.446	0.347	1	sLGR5_male	MEX3A
0.000119308	0.176412	0.289	0.189	1	sLGR5_male	MED12
0.000119519	0.153397	0.357	0.257	1	sLGR5_male	CERS5
0.000122766	0.182438	0.929	0.917	1	sLGR5_male	RAN
0.000122975	0.189752	0.432	0.332	1	sLGR5_male	NUP58
0.000123478	0.178154	0.379	0.287	1	sLGR5_male	SPATC1L
0.000123538	0.168867	0.639	0.533	1	sLGR5_male	COPB2
0.000124867	0.18068	0.25	0.168	1	sLGR5_male	GPC2
0.000127461	0.142663	0.218	0.123	1	sLGR5_male	NDRG1
0.000128159	0.133203	0.221	0.133	1	sLGR5_male	NT5DC2
0.000129142	0.160658	0.296	0.205	1	sLGR5_male	PHLDB1
0.000131298	0.153062	0.236	0.154	1	sLGR5_male	LDLRAD3
0.000134404	0.170249	0.65	0.556	1	sLGR5_male	SNRPA
0.000135671	0.178207	0.725	0.655	1	sLGR5_male	DAZAP2
0.000138421	0.146996	0.289	0.198	1	sLGR5_male	ANAPC7
0.000139228	0.173019	0.768	0.708	1	sLGR5_male	CALM3
0.000139464	0.181731	0.554	0.437	1	sLGR5_male	SLC35F2
0.000142821	0.404967	0.907	0.932	1	sLGR5_male	PRDX1
0.000145413	0.155518	0.421	0.306	1	sLGR5_male	USP5
0.000152293	0.175717	0.382	0.289	1	sLGR5_male	TTYH3
0.000155361	0.173708	0.325	0.239	1	sLGR5_male	CLASRP
0.000157716	0.16464	0.854	0.797	1	sLGR5_male	SRSF10
0.000161316	0.166648	0.361	0.28	1	sLGR5_male	ANKRD54
0.000161998	0.171262	0.4	0.303	1	sLGR5_male	GOLM1
0.000166361	0.18281	0.229	0.154	1	sLGR5_male	MMP11
0.000169729	0.143184	0.85	0.776	1	sLGR5_male	SSB
0.000170607	0.178991	0.425	0.32	1	sLGR5_male	PRKAR1B
0.000181478	0.209281	0.754	0.711	1	sLGR5_male	ECI2
0.000185862	0.128848	0.211	0.127	1	sLGR5_male	CNST
0.00019224	0.171387	0.818	0.779	1	sLGR5_male	VDAC2
0.000202677	0.157585	0.611	0.515	1	sLGR5_male	STIP1
0.000202728	0.13313	0.204	0.116	1	sLGR5_male	RAB32
0.000206584	0.14407	0.214	0.136	1	sLGR5_male	NFRKB
0.000211057	0.147753	0.371	0.278	1	sLGR5_male	VPS51
0.000214474	0.17278	0.861	0.797	1	sLGR5_male	MAGED1
0.000215629	0.168235	0.471	0.367	1	sLGR5_male	NFYC
0.000223534	0.139842	0.321	0.218	1	sLGR5_male	EPS15L1
0.000228314	0.193659	0.696	0.641	1	sLGR5_male	PFDN2
0.000229835	0.156503	0.611	0.506	1	sLGR5_male	GNAI2
0.000238053	0.207614	0.471	0.379	1	sLGR5_male	ENAH
0.00024494	0.145536	0.318	0.225	1	sLGR5_male	PSEN1
0.000245269	0.143256	0.461	0.352	1	sLGR5_male	IFT52
0.000252343	0.164802	0.407	0.317	1	sLGR5_male	WDR45B
0.00025334	0.181642	0.311	0.23	1	sLGR5_male	CACNB3
0.000255061	0.19251	0.425	0.35	1	sLGR5_male	ARIH1
0.000258785	0.148811	0.504	0.382	1	sLGR5_male	UNC119
0.000261181	0.144505	0.846	0.785	1	sLGR5_male	OTUB1
0.00026669	0.165747	0.454	0.35	1	sLGR5_male	ZNF664
0.000271715	0.137541	0.275	0.174	1	sLGR5_male	KCTD20
0.00027866	0.187862	0.529	0.444	1	sLGR5_male	OAZ2
0.000279792	0.158574	0.407	0.306	1	sLGR5_male	IWS1
0.000282961	0.183072	0.446	0.356	1	sLGR5_male	PBRM1
0.000283074	0.175583	0.593	0.504	1	sLGR5_male	GDI1
0.000290139	0.148834	0.268	0.192	1	sLGR5_male	BANP
0.000296786	0.157075	0.3	0.21	1	sLGR5_male	NCOR2
0.000302195	0.162918	0.854	0.794	1	sLGR5_male	CCT3
0.000303645	0.152568	0.65	0.549	1	sLGR5_male	UBE2L3
0.000304623	0.165254	0.429	0.306	1	sLGR5_male	CTCF
0.00030617	0.153049	0.364	0.274	1	sLGR5_male	SFSWAP
0.000316768	0.113487	0.214	0.128	1	sLGR5_male	LRRC28
0.000324545	0.129874	0.239	0.154	1	sLGR5_male	CHD1L
0.00033132	0.159876	0.275	0.193	1	sLGR5_male	MCM7
0.000333504	0.165816	0.939	0.96	1	sLGR5_male	EEF1D
0.000340979	0.162852	0.35	0.256	1	sLGR5_male	MED16
0.000341829	0.157098	0.289	0.208	1	sLGR5_male	SMPD4
0.000342111	0.132527	0.243	0.153	1	sLGR5_male	CDADC1
0.000343265	0.150444	0.393	0.272	1	sLGR5_male	C16orf87
0.000353249	0.159519	0.475	0.392	1	sLGR5_male	SNX1
0.000354845	0.158738	0.218	0.149	1	sLGR5_male	IGF2-AS
0.000360337	0.142029	0.214	0.151	1	sLGR5_male	GMDS
0.00036278	0.171563	0.614	0.543	1	sLGR5_male	MED28
0.000364337	0.166096	0.421	0.338	1	sLGR5_male	GTF3C5
0.000370691	0.177571	0.389	0.31	1	sLGR5_male	UCKL1
0.000371991	0.133722	0.207	0.13	1	sLGR5_male	CENPV
0.000381219	0.114302	0.204	0.121	1	sLGR5_male	ANO10
0.000394659	0.11676	0.214	0.125	1	sLGR5_male	FAF1
0.000408763	0.151981	0.221	0.153	1	sLGR5_male	UBQLN4
0.000411473	0.132462	0.314	0.218	1	sLGR5_male	MECP2
0.000417653	0.251802	0.596	0.565	1	sLGR5_male	PDIA4
0.000422918	0.177022	0.525	0.438	1	sLGR5_male	TMEM167A
0.000445872	0.184994	0.686	0.583	1	sLGR5_male	MME
0.000447729	0.132839	0.371	0.268	1	sLGR5_male	PRMT5
0.000449024	0.16786	0.482	0.379	1	sLGR5_male	CHD7
0.000478623	0.126077	0.886	0.832	1	sLGR5_male	UBXN4
0.000484893	0.116676	0.975	0.961	1	sLGR5_male	CIRBP
0.000485342	0.142906	0.354	0.238	1	sLGR5_male	AKAP17A
0.000495927	0.148087	0.354	0.265	1	sLGR5_male	PCIF1
0.000496738	0.150631	0.332	0.241	1	sLGR5_male	RBM15B
0.000502531	0.16134	0.304	0.223	1	sLGR5_male	BEND5
0.000514319	0.144555	0.296	0.2	1	sLGR5_male	CRKL
0.000517362	0.137373	0.271	0.175	1	sLGR5_male	ZC3H7B
0.000522887	0.148731	0.279	0.194	1	sLGR5_male	ARHGAP17
0.000525346	0.132707	0.979	0.984	1	sLGR5_male	RPL22
0.000531322	0.13933	0.614	0.52	1	sLGR5_male	HNRNPD
0.000533803	0.142446	0.425	0.322	1	sLGR5_male	GNL1
0.000534879	0.128511	0.279	0.181	1	sLGR5_male	ZNF414
0.000538081	0.116364	0.236	0.149	1	sLGR5_male	ERF
0.000539146	0.15572	0.539	0.445	1	sLGR5_male	PDHB
0.000543521	0.126877	0.225	0.15	1	sLGR5_male	DUS3L
0.000548447	0.171509	0.404	0.336	1	sLGR5_male	MMP14
0.000563067	0.123333	0.393	0.279	1	sLGR5_male	HAUS1
0.000569664	0.12972	0.236	0.161	1	sLGR5_male	MAIP1
0.000575593	0.139611	0.404	0.307	1	sLGR5_male	NCBP2-AS2
0.000579067	0.133224	0.279	0.194	1	sLGR5_male	ATP2A2
0.000580273	0.167983	0.611	0.538	1	sLGR5_male	LSM8
0.000585914	0.155068	0.557	0.473	1	sLGR5_male	GNB1
0.000589338	0.141842	0.979	0.993	1	sLGR5_male	CFL1
0.000593806	0.145184	0.289	0.208	1	sLGR5_male	GFER
0.000595483	0.198444	0.464	0.424	1	sLGR5_male	STK25
0.000606636	0.144317	0.686	0.587	1	sLGR5_male	TCP1
0.000608385	0.13627	0.475	0.375	1	sLGR5_male	DAP3
0.000608592	0.131506	0.221	0.142	1	sLGR5_male	DBP
0.000618015	0.12353	0.232	0.144	1	sLGR5_male	MAP7D1
0.000635026	0.159381	0.621	0.546	1	sLGR5_male	MICU1
0.000668009	0.125799	0.275	0.179	1	sLGR5_male	CBFA2T2
0.000670876	0.146898	0.521	0.428	1	sLGR5_male	MBOAT7
0.000671011	0.136828	0.275	0.193	1	sLGR5_male	FAM189B
0.000689187	0.165061	0.564	0.478	1	sLGR5_male	NENF
0.000693896	0.158918	0.368	0.289	1	sLGR5_male	KHSRP
0.000704713	0.14845	0.764	0.685	1	sLGR5_male	SNX6
0.000705726	0.143031	0.986	0.994	1	sLGR5_male	RPS6
0.000721977	0.137371	0.457	0.351	1	sLGR5_male	POLR2B
0.000734281	0.166413	0.204	0.141	1	sLGR5_male	BMF
0.000736423	0.141614	0.311	0.222	1	sLGR5_male	ATXN3
0.000739842	0.148731	0.243	0.18	1	sLGR5_male	ARNT2
0.000761705	0.161429	0.486	0.404	1	sLGR5_male	SAFB
0.00076346	0.202918	0.704	0.675	1	sLGR5_male	GSTA4
0.000771242	0.129859	0.25	0.168	1	sLGR5_male	MAPKAP1
0.000775979	0.14705	0.564	0.47	1	sLGR5_male	UBA2
0.000781186	0.119965	0.211	0.132	1	sLGR5_male	SMG6
0.000782153	0.16559	0.65	0.571	1	sLGR5_male	TKT
0.000792174	0.111662	0.357	0.239	1	sLGR5_male	SIAH1
0.000798481	0.131054	0.232	0.17	1	sLGR5_male	AL359915.1
0.00081718	0.129597	0.304	0.217	1	sLGR5_male	USP3
0.000821595	0.112993	0.243	0.159	1	sLGR5_male	CD99L2
0.00082876	0.149784	0.814	0.752	1	sLGR5_male	RSRC2
0.000833669	0.145108	0.243	0.175	1	sLGR5_male	GABBR1
0.00084002	0.125113	0.404	0.308	1	sLGR5_male	RAB4A
0.000840394	0.140697	0.343	0.262	1	sLGR5_male	AP3B1
0.000849627	0.16418	0.971	0.991	1	sLGR5_male	PPIA
0.00088435	0.145771	0.279	0.208	1	sLGR5_male	ABCC5
0.000908431	0.16032	0.379	0.282	1	sLGR5_male	RABL6
0.000916959	0.142017	0.793	0.699	1	sLGR5_male	GTF2I
0.000931178	0.124847	0.271	0.193	1	sLGR5_male	THNSL2
0.000931249	0.159332	0.611	0.541	1	sLGR5_male	PSMC4
0.000934098	0.170169	0.279	0.193	1	sLGR5_male	HIST1H1D
0.000939391	0.138882	0.514	0.407	1	sLGR5_male	MAP2K2
0.000939972	0.148655	0.261	0.19	1	sLGR5_male	OXSR1
0.000962749	0.184897	0.357	0.281	1	sLGR5_male	KCTD8
0.000977352	0.136492	0.7	0.609	1	sLGR5_male	SDCBP
0.000978266	0.151758	0.214	0.148	1	sLGR5_male	DHX38
0.000984196	0.131881	0.239	0.163	1	sLGR5_male	TENM4
0.000985888	0.148786	0.436	0.356	1	sLGR5_male	QARS
0.00101115	0.116467	0.271	0.188	1	sLGR5_male	JMJD6
0.00101498	0.16348	0.939	0.953	1	sLGR5_male	ATP5MC3
0.00101851	0.119389	0.289	0.19	1	sLGR5_male	THAP11
0.00106387	0.120839	0.957	0.929	1	sLGR5_male	CCNI
0.00108151	0.161792	0.786	0.745	1	sLGR5_male	CCT7
0.00114096	0.101355	0.207	0.122	1	sLGR5_male	CIB2
0.00117469	0.164356	0.475	0.398	1	sLGR5_male	SRPK2
0.0011757	0.169694	0.65	0.533	1	sLGR5_male	PTBP3
0.00120112	0.166784	0.339	0.272	1	sLGR5_male	BICD1
0.00120756	0.173596	1	0.999	1	sLGR5_male	MT-CO1
0.00121775	0.150405	0.371	0.258	1	sLGR5_male	GLUD1
0.0012181	0.155711	0.593	0.512	1	sLGR5_male	HSPA4
0.00125893	0.15204	0.675	0.593	1	sLGR5_male	VGLL4
0.00130535	0.156705	0.236	0.17	1	sLGR5_male	SYNGAP1
0.00131044	0.127877	0.293	0.216	1	sLGR5_male	PCED1B
0.00131253	0.14725	0.236	0.168	1	sLGR5_male	PI4KA
0.00131715	0.109885	0.464	0.344	1	sLGR5_male	YWHAH
0.00132506	0.11932	0.225	0.146	1	sLGR5_male	WDTC1
0.00133775	0.158816	0.425	0.353	1	sLGR5_male	GSK3B
0.0013508	0.149637	0.468	0.402	1	sLGR5_male	NKIRAS2
0.00135242	0.162269	0.361	0.291	1	sLGR5_male	SESN1
0.00135616	0.125768	0.75	0.651	1	sLGR5_male	TRA2B
0.00136349	0.116228	0.229	0.152	1	sLGR5_male	UBE2M
0.00137351	0.114687	0.204	0.127	1	sLGR5_male	ZNF408
0.00137357	0.141963	0.686	0.622	1	sLGR5_male	CTNNA1
0.00138518	0.142273	0.882	0.875	1	sLGR5_male	UBE2I
0.00139448	0.115442	0.325	0.222	1	sLGR5_male	MAPK1
0.00142388	0.130324	0.364	0.256	1	sLGR5_male	RND3
0.00144361	0.130583	0.468	0.37	1	sLGR5_male	PAK4
0.00150394	0.110554	0.264	0.179	1	sLGR5_male	RRP8
0.00152026	0.127469	0.243	0.17	1	sLGR5_male	PLOD3
0.00153828	0.124443	0.404	0.311	1	sLGR5_male	PRKRIP1
0.00156559	0.121147	0.293	0.205	1	sLGR5_male	STX16
0.00158556	0.156244	0.354	0.275	1	sLGR5_male	LAMB1
0.00159062	0.178961	0.393	0.313	1	sLGR5_male	DSC2
0.00159391	0.169055	0.389	0.297	1	sLGR5_male	LENG8
0.00163228	0.12642	0.254	0.186	1	sLGR5_male	GYG1
0.00163563	0.108031	0.236	0.165	1	sLGR5_male	ACTR8
0.00165446	0.131091	0.443	0.359	1	sLGR5_male	GTF2B
0.00165505	0.124944	0.246	0.169	1	sLGR5_male	POMGNT1
0.00168096	0.152326	0.5	0.424	1	sLGR5_male	FNTA
0.00170244	0.131456	0.329	0.256	1	sLGR5_male	FLAD1
0.00172057	0.134691	0.243	0.181	1	sLGR5_male	MAPK8IP3
0.00174427	0.13104	0.793	0.742	1	sLGR5_male	TRIR
0.00174928	0.139416	0.407	0.329	1	sLGR5_male	AAAS
0.00176311	0.138925	0.6	0.517	1	sLGR5_male	RBCK1
0.00176866	0.120724	0.393	0.297	1	sLGR5_male	GARS
0.00180926	0.153742	0.611	0.526	1	sLGR5_male	TCEAL7
0.00184082	0.131858	0.671	0.598	1	sLGR5_male	PSMD4
0.00186299	0.15118	0.532	0.458	1	sLGR5_male	PDHA1
0.00186456	0.133338	0.254	0.177	1	sLGR5_male	NRIP1
0.00187412	0.105023	0.546	0.419	1	sLGR5_male	CTXN1
0.00187596	0.146295	0.468	0.381	1	sLGR5_male	TMEM11
0.00189055	0.128205	0.296	0.222	1	sLGR5_male	HDAC8
0.00195893	0.129788	0.664	0.566	1	sLGR5_male	WASF2
0.00197951	0.146619	0.639	0.573	1	sLGR5_male	DCTN2
0.00201547	0.145087	0.714	0.664	1	sLGR5_male	DNAJB6
0.00204366	0.182658	0.539	0.491	1	sLGR5_male	TAF15
0.00207415	0.144395	0.318	0.243	1	sLGR5_male	API5
0.00213037	0.136581	0.611	0.525	1	sLGR5_male	LUC7L
0.00217424	0.139459	0.257	0.182	1	sLGR5_male	ROBO2
0.00217933	0.148963	0.471	0.404	1	sLGR5_male	SAMM50
0.00229464	0.142895	0.379	0.322	1	sLGR5_male	PMPCA
0.00236695	0.145355	0.318	0.238	1	sLGR5_male	CRLF1
0.00243533	0.155288	0.632	0.576	1	sLGR5_male	KDELR2
0.00243831	0.126663	0.421	0.333	1	sLGR5_male	TPD52L2
0.00247249	0.125893	0.368	0.283	1	sLGR5_male	APOBEC3G
0.00252534	0.115102	0.289	0.208	1	sLGR5_male	USB1
0.00253534	0.20363	0.629	0.57	1	sLGR5_male	PRKDC
0.00254433	0.1227	0.236	0.164	1	sLGR5_male	KHDRBS3
0.00254728	0.111822	0.207	0.133	1	sLGR5_male	PAK3
0.00255327	0.131336	0.918	0.894	1	sLGR5_male	NREP
0.00260458	0.135336	0.843	0.786	1	sLGR5_male	STRAP
0.00269264	0.130796	0.625	0.541	1	sLGR5_male	PSMD6
0.00270211	0.159088	0.386	0.328	1	sLGR5_male	USP13
0.00270645	0.151004	0.582	0.517	1	sLGR5_male	EIF2S2
0.00275696	0.117699	0.461	0.377	1	sLGR5_male	HNRNPLL
0.00277916	0.28639	0.418	0.373	1	sLGR5_male	IGFBP3
0.00284089	0.153584	0.446	0.376	1	sLGR5_male	FAM50A
0.00289742	0.136435	0.336	0.262	1	sLGR5_male	MARS
0.00290335	0.120887	0.293	0.214	1	sLGR5_male	GPRC5C
0.00294	0.197334	0.318	0.194	1	sLGR5_male	ACTC1
0.00294515	0.125092	0.771	0.707	1	sLGR5_male	SMIM26
0.00295233	0.129602	0.514	0.426	1	sLGR5_male	CRIP2
0.00298895	0.116086	0.236	0.164	1	sLGR5_male	PPP2R2D
0.0029914	0.136267	0.254	0.176	1	sLGR5_male	PPFIA1
0.00304689	0.170382	0.254	0.176	1	sLGR5_male	RGS5
0.00304816	0.139408	0.7	0.643	1	sLGR5_male	CBX1
0.00306792	0.119471	0.229	0.16	1	sLGR5_male	C3orf70
0.00306812	0.1466	0.207	0.157	1	sLGR5_male	ENG
0.00307453	0.149808	0.743	0.696	1	sLGR5_male	TXNL1
0.00308061	0.14766	0.732	0.68	1	sLGR5_male	RTF1
0.00314766	0.184319	0.864	0.885	1	sLGR5_male	TCEAL9
0.00315056	0.127772	0.314	0.235	1	sLGR5_male	KDM3B
0.00317263	0.104169	0.239	0.169	1	sLGR5_male	ASMTL
0.00318028	0.126049	0.329	0.253	1	sLGR5_male	COIL
0.00318852	0.128712	0.471	0.403	1	sLGR5_male	ERAL1
0.00319344	0.105379	0.232	0.157	1	sLGR5_male	CCNQ
0.00320159	0.105911	0.225	0.154	1	sLGR5_male	RNF139
0.00326545	0.114182	0.475	0.389	1	sLGR5_male	PSMD14
0.00326761	0.103592	0.229	0.153	1	sLGR5_male	REXO4
0.00328521	0.177394	0.246	0.194	1	sLGR5_male	CYP26B1
0.00328826	0.131375	0.368	0.292	1	sLGR5_male	SAFB2
0.00331858	0.120025	0.221	0.16	1	sLGR5_male	PPM1D
0.00338135	0.145524	0.675	0.626	1	sLGR5_male	NOP53
0.00345079	0.116167	0.321	0.24	1	sLGR5_male	ACOT2
0.0034611	0.12997	0.511	0.435	1	sLGR5_male	FAM92A
0.00352425	0.115838	0.221	0.143	1	sLGR5_male	CHST3
0.0035623	0.131894	0.386	0.311	1	sLGR5_male	ISOC1
0.00357689	0.149477	0.771	0.736	1	sLGR5_male	RPS20
0.00357739	0.130429	0.593	0.527	1	sLGR5_male	CRMP1
0.00359108	0.126481	0.421	0.348	1	sLGR5_male	RAB5B
0.00360309	0.120076	0.229	0.168	1	sLGR5_male	ALAS1
0.00362476	0.128469	0.318	0.237	1	sLGR5_male	SMTNL2
0.00362897	0.149824	0.55	0.489	1	sLGR5_male	NELFCD
0.00363838	0.120409	0.357	0.28	1	sLGR5_male	CA11
0.00364124	0.123311	0.4	0.323	1	sLGR5_male	AP1M1
0.00364755	0.130203	0.314	0.237	1	sLGR5_male	KDM3A
0.00375951	0.163721	0.493	0.422	1	sLGR5_male	MYO10
0.00377475	0.109652	0.736	0.655	1	sLGR5_male	JPT1
0.00381717	0.129668	0.693	0.626	1	sLGR5_male	EMD
0.00382772	0.15121	0.475	0.412	1	sLGR5_male	ECHDC1
0.00384478	0.141201	0.354	0.277	1	sLGR5_male	ARID1A
0.00385127	0.124956	0.343	0.278	1	sLGR5_male	MAEA
0.00387437	0.118868	0.779	0.713	1	sLGR5_male	SNRPD1
0.00387828	0.13321	0.536	0.448	1	sLGR5_male	TOX4
0.00388063	0.115338	0.311	0.239	1	sLGR5_male	WDR70
0.00390486	0.136252	0.914	0.883	1	sLGR5_male	RBM39
0.00395689	0.122578	0.382	0.31	1	sLGR5_male	CFL2
0.00403747	0.107129	0.211	0.143	1	sLGR5_male	INPPL1
0.00422662	0.136879	0.336	0.276	1	sLGR5_male	NANS
0.00429037	0.138269	0.457	0.388	1	sLGR5_male	PTK7
0.00430336	0.129416	0.725	0.664	1	sLGR5_male	SNRPB
0.00433414	0.147163	0.646	0.596	1	sLGR5_male	SYF2
0.00434869	0.101226	0.261	0.185	1	sLGR5_male	GNG12
0.00435215	0.105824	0.236	0.161	1	sLGR5_male	KCMF1
0.00435776	0.124458	0.639	0.536	1	sLGR5_male	MLEC
0.00436912	0.135537	0.643	0.58	1	sLGR5_male	PAPOLA
0.00442555	0.11573	0.521	0.431	1	sLGR5_male	ACAA1
0.00444758	0.150761	0.821	0.795	1	sLGR5_male	STMP1
0.00446158	0.144636	0.532	0.472	1	sLGR5_male	CAP1
0.00459258	0.110101	0.243	0.175	1	sLGR5_male	ATG13
0.00464191	0.126226	0.239	0.191	1	sLGR5_male	HSDL1
0.00467402	0.125851	0.286	0.229	1	sLGR5_male	WDR12
0.00470845	0.126813	0.271	0.215	1	sLGR5_male	ZNF426
0.00473798	0.100145	0.211	0.145	1	sLGR5_male	CDK19
0.00474946	0.115744	0.35	0.282	1	sLGR5_male	CCDC130
0.00478327	0.116284	0.361	0.287	1	sLGR5_male	PES1
0.00478406	0.135235	0.421	0.349	1	sLGR5_male	SLC25A1
0.00486242	0.150473	0.514	0.447	1	sLGR5_male	ZPBP
0.00486402	0.131915	0.439	0.371	1	sLGR5_male	TBL1XR1
0.00486579	0.123076	0.389	0.312	1	sLGR5_male	PARD3
0.0049007	0.137546	0.65	0.588	1	sLGR5_male	MAPK1IP1L
0.00492716	0.126765	0.375	0.304	1	sLGR5_male	EHMT1
0.0049865	0.106191	0.225	0.161	1	sLGR5_male	FBXO42
0.00520386	0.155825	0.743	0.716	1	sLGR5_male	UQCRC1
0.00522579	0.133941	0.643	0.557	1	sLGR5_male	PSMC6
0.00526262	0.135569	0.536	0.461	1	sLGR5_male	FEZ2
0.00526977	0.118406	0.518	0.453	1	sLGR5_male	CNIH4
0.00527648	0.102758	0.3	0.227	1	sLGR5_male	MRPS27
0.00527893	0.153768	0.561	0.511	1	sLGR5_male	YY1
0.00528142	0.105771	0.414	0.319	1	sLGR5_male	NFKBIL1
0.00528622	0.111412	0.282	0.2	1	sLGR5_male	TSC2
0.00540831	0.103074	0.764	0.709	1	sLGR5_male	H2AFY
0.00557839	0.122477	0.293	0.23	1	sLGR5_male	C1orf198
0.00558393	0.13715	0.554	0.482	1	sLGR5_male	SEPT9
0.00561528	0.10177	0.239	0.163	1	sLGR5_male	STX6
0.00565447	0.128483	0.293	0.233	1	sLGR5_male	EIF3B
0.00567967	0.106139	0.314	0.236	1	sLGR5_male	TINF2
0.00568807	0.142574	0.375	0.317	1	sLGR5_male	CNOT8
0.0056894	0.107273	0.375	0.295	1	sLGR5_male	UBAP2L
0.0057185	0.113146	0.711	0.64	1	sLGR5_male	RAB7A
0.00573266	0.11292	0.3	0.229	1	sLGR5_male	RANBP3
0.00578055	0.150974	0.593	0.548	1	sLGR5_male	VAT1
0.00578731	0.169908	0.514	0.467	1	sLGR5_male	ZMYM2
0.00582924	0.144735	0.975	0.994	1	sLGR5_male	HSP90AB1
0.0058512	0.137578	0.286	0.215	1	sLGR5_male	MICU3
0.00585313	0.113326	0.264	0.197	1	sLGR5_male	FTSJ1
0.00595255	0.114567	0.225	0.157	1	sLGR5_male	SNX9
0.00613552	0.12918	0.368	0.286	1	sLGR5_male	YAP1
0.0061741	0.113762	0.368	0.296	1	sLGR5_male	KARS
0.00619861	0.134586	0.246	0.192	1	sLGR5_male	CENPVL3
0.00621816	0.122776	0.493	0.431	1	sLGR5_male	SF3A3
0.00633619	0.107039	0.218	0.15	1	sLGR5_male	SYVN1
0.00639959	0.11476	0.668	0.592	1	sLGR5_male	UQCRC2
0.0064125	0.117939	0.321	0.264	1	sLGR5_male	MLX
0.0064144	0.10733	0.325	0.236	1	sLGR5_male	PANK2
0.00648165	0.112695	0.3	0.231	1	sLGR5_male	XAB2
0.00673045	0.10819	0.321	0.251	1	sLGR5_male	ABHD12
0.00677205	0.132867	0.393	0.334	1	sLGR5_male	DBNL
0.00678246	0.134871	0.25	0.204	1	sLGR5_male	TP53I11
0.00678336	0.142628	0.625	0.563	1	sLGR5_male	DDX46
0.00679407	0.146219	0.389	0.326	1	sLGR5_male	AKAP13
0.00684479	0.10708	0.475	0.399	1	sLGR5_male	CDC123
0.00688925	0.122416	0.661	0.589	1	sLGR5_male	CTNNB1
0.00691199	0.11584	0.4	0.333	1	sLGR5_male	MRPL15
0.00692875	0.130251	0.418	0.351	1	sLGR5_male	RAF1
0.00696219	0.132531	0.525	0.462	1	sLGR5_male	HMGB3
0.00732571	0.139238	0.354	0.26	1	sLGR5_male	MYLIP
0.00734047	0.137274	0.557	0.489	1	sLGR5_male	RPL7L1
0.00760443	0.136397	0.511	0.441	1	sLGR5_male	KANSL1
0.00764248	0.129793	0.479	0.418	1	sLGR5_male	ELOVL5
0.00766964	0.126156	0.532	0.467	1	sLGR5_male	MTF2
0.00783112	0.118642	0.325	0.26	1	sLGR5_male	NDUFS1
0.00788265	0.113049	0.318	0.252	1	sLGR5_male	ACLY
0.00798149	0.110394	0.261	0.195	1	sLGR5_male	TMEM63B
0.00816545	0.124015	0.639	0.583	1	sLGR5_male	CCT5
0.00826227	0.154479	0.286	0.24	1	sLGR5_male	DYNC1LI1
0.00836699	0.132233	0.579	0.53	1	sLGR5_male	DECR1
0.00843401	0.131257	0.246	0.193	1	sLGR5_male	IGLON5
0.00847566	0.109693	0.243	0.188	1	sLGR5_male	DNAJC17
0.00854682	0.119778	0.386	0.305	1	sLGR5_male	GTF3C1
0.00860695	0.132138	0.479	0.427	1	sLGR5_male	RTCB
0.00861219	0.101561	0.218	0.155	1	sLGR5_male	LDLR
0.00872778	0.152692	0.346	0.31	1	sLGR5_male	UBXN2A
0.00876653	0.108659	0.314	0.244	1	sLGR5_male	PELO
0.00879329	0.138896	0.218	0.174	1	sLGR5_male	CADM2
0.00885473	0.106747	0.336	0.264	1	sLGR5_male	QKI
0.00886652	0.135262	0.418	0.358	1	sLGR5_male	UNC45A
0.00896213	0.109534	0.439	0.358	1	sLGR5_male	SMARCD1
0.00904585	0.121517	0.518	0.44	1	sLGR5_male	EIF4A3
0.00908142	0.111923	0.296	0.24	1	sLGR5_male	TRRAP
0.00934018	0.119347	0.282	0.217	1	sLGR5_male	SUGP2
0.00934171	0.121775	0.246	0.201	1	sLGR5_male	RBPMS2
0.00962048	0.106899	0.289	0.226	1	sLGR5_male	NCAM1
0.00970609	0.141536	0.421	0.362	1	sLGR5_male	ZNF714
0.00990246	0.13197	0.843	0.834	1	sLGR5_male	APEX1
0.00999205	0.126999	0.221	0.183	1	sLGR5_male	TPP2
0.0100525	0.142463	0.543	0.494	1	sLGR5_male	THOC2
0.0100839	0.121506	0.379	0.331	1	sLGR5_male	DTX3
0.0100869	0.128117	0.354	0.29	1	sLGR5_male	TPM2
0.0102597	0.100862	0.218	0.167	1	sLGR5_male	CRY1
0.010262	0.108658	0.7	0.639	1	sLGR5_male	PSMA4
0.0102884	0.117792	0.661	0.574	1	sLGR5_male	TMPO
0.0103468	0.101901	0.204	0.15	1	sLGR5_male	APAF1
0.0104396	0.107671	0.443	0.374	1	sLGR5_male	CUX1
0.0104664	0.109812	0.429	0.354	1	sLGR5_male	CDK5RAP3
0.0105154	0.133993	0.346	0.296	1	sLGR5_male	SHC1
0.0107137	0.164327	0.986	0.999	1	sLGR5_male	MT-CYB
0.0109969	0.13911	0.454	0.403	1	sLGR5_male	DCTD
0.0110424	0.109471	0.286	0.223	1	sLGR5_male	SLC36A4
0.0111313	0.120964	0.525	0.45	1	sLGR5_male	KLHL24
0.0112385	0.103517	0.296	0.241	1	sLGR5_male	ANKLE2
0.0113258	0.100981	0.318	0.261	1	sLGR5_male	MCM3
0.0114311	0.127905	0.432	0.366	1	sLGR5_male	HMGCR
0.0119683	0.109007	0.907	0.909	1	sLGR5_male	RAC1
0.0119806	0.104689	0.418	0.345	1	sLGR5_male	ATF6B
0.0121672	0.107742	0.421	0.351	1	sLGR5_male	COPS3
0.0122857	0.128944	0.336	0.294	1	sLGR5_male	PSPC1
0.0123211	0.149054	0.325	0.269	1	sLGR5_male	FIRRE
0.012418	0.118629	0.618	0.556	1	sLGR5_male	PSMC1
0.0125673	0.113633	0.332	0.28	1	sLGR5_male	CLK3
0.0126028	0.117513	0.275	0.222	1	sLGR5_male	ASPSCR1
0.0129877	0.133662	0.264	0.221	1	sLGR5_male	FNIP1
0.0131077	0.118371	0.468	0.393	1	sLGR5_male	DDX42
0.0133362	0.135934	0.493	0.432	1	sLGR5_male	DNAAF2
0.0137827	0.101409	0.225	0.172	1	sLGR5_male	DTNBP1
0.0141045	0.111836	0.6	0.549	1	sLGR5_male	SNX17
0.0142854	0.190588	0.511	0.487	1	sLGR5_male	BRD3
0.0144035	0.123255	0.604	0.55	1	sLGR5_male	HNRNPH1
0.0145081	0.12268	0.3	0.237	1	sLGR5_male	INSIG1
0.0145423	0.125505	0.425	0.378	1	sLGR5_male	KIAA1191
0.0148129	0.104169	0.304	0.238	1	sLGR5_male	GPC1
0.0150512	0.113614	0.439	0.383	1	sLGR5_male	SLC39A7
0.0150687	0.115821	0.207	0.168	1	sLGR5_male	SETD1B
0.0152394	0.11267	0.961	0.969	1	sLGR5_male	RPL7
0.015308	0.126316	0.7	0.643	1	sLGR5_male	OCIAD2
0.0153153	0.107273	0.461	0.402	1	sLGR5_male	PEA15
0.015329	0.11757	0.511	0.452	1	sLGR5_male	PPP1R12A
0.0153966	0.12393	0.461	0.411	1	sLGR5_male	SNW1
0.0155176	0.134419	0.436	0.4	1	sLGR5_male	SCAMP3
0.0156839	0.102647	0.404	0.341	1	sLGR5_male	USP39
0.015805	0.12135	0.282	0.233	1	sLGR5_male	JARID2
0.0159241	0.108098	0.257	0.211	1	sLGR5_male	SETDB1
0.0159689	0.124696	0.507	0.446	1	sLGR5_male	SETD5
0.0161891	0.1074	0.311	0.262	1	sLGR5_male	TMEM69
0.0165496	0.105578	0.425	0.357	1	sLGR5_male	C12orf10
0.016886	0.110776	0.382	0.315	1	sLGR5_male	CDC34
0.0175922	0.119997	0.396	0.331	1	sLGR5_male	SCAMP4
0.0176433	0.131605	0.418	0.367	1	sLGR5_male	ACAT2
0.0177543	0.124459	0.518	0.439	1	sLGR5_male	MBNL3
0.017767	0.114856	0.3	0.243	1	sLGR5_male	ZNF444
0.0179371	0.113813	0.611	0.547	1	sLGR5_male	NDUFS3
0.0179908	0.116638	0.507	0.465	1	sLGR5_male	PSMD1
0.0179924	0.108526	0.364	0.307	1	sLGR5_male	DFFA
0.0180124	0.114569	0.314	0.267	1	sLGR5_male	DICER1
0.0180566	0.104034	0.346	0.284	1	sLGR5_male	UBTF
0.018082	0.105918	0.418	0.356	1	sLGR5_male	DDX56
0.0181379	0.1521	0.282	0.249	1	sLGR5_male	MORC3
0.0181415	0.104266	0.264	0.214	1	sLGR5_male	SLC4A2
0.018391	0.114873	0.407	0.348	1	sLGR5_male	NT5C3A
0.0187375	0.109611	0.843	0.827	1	sLGR5_male	C4orf3
0.0188615	0.154506	0.568	0.532	1	sLGR5_male	PRRC2B
0.0189076	0.101482	0.525	0.443	1	sLGR5_male	GORASP2
0.0189133	0.130624	0.611	0.556	1	sLGR5_male	CNN3
0.0189377	0.116583	0.332	0.275	1	sLGR5_male	FHL3
0.0189429	0.120226	0.368	0.314	1	sLGR5_male	RASL12
0.0189583	0.11492	0.346	0.294	1	sLGR5_male	NUPL2
0.0190462	0.122616	0.711	0.683	1	sLGR5_male	GNB2
0.0190759	0.116962	0.361	0.306	1	sLGR5_male	ZNF821
0.0192284	0.238925	0.939	0.951	1	sLGR5_male	HSP90B1
0.0192615	0.115828	0.4	0.346	1	sLGR5_male	UBQLN1
0.0197451	0.102298	0.318	0.262	1	sLGR5_male	SLC7A8
0.0202593	0.101476	0.468	0.404	1	sLGR5_male	SPG7
0.0203172	0.10992	0.607	0.54	1	sLGR5_male	PSMD7
0.0203516	0.103627	0.521	0.465	1	sLGR5_male	IST1
0.0203517	0.153528	0.589	0.538	1	sLGR5_male	PLOD2
0.0205336	0.101117	0.518	0.443	1	sLGR5_male	RBFOX2
0.0206374	0.120904	0.3	0.256	1	sLGR5_male	KDM6B
0.0206897	0.127086	0.314	0.271	1	sLGR5_male	PTPRK
0.0208029	0.161881	0.446	0.403	1	sLGR5_male	NARF
0.0215641	0.106393	0.411	0.356	1	sLGR5_male	MACF1
0.021771	0.117841	0.232	0.19	1	sLGR5_male	TRNAU1AP
0.0219073	0.10477	0.475	0.41	1	sLGR5_male	FBXO7
0.0220236	0.110722	0.536	0.483	1	sLGR5_male	NAPA
0.0221394	0.114157	0.282	0.235	1	sLGR5_male	MMS19
0.0222819	0.1188	0.246	0.208	1	sLGR5_male	NUAK1
0.0231465	0.117974	0.821	0.795	1	sLGR5_male	COX7B
0.0235448	0.137685	0.489	0.435	1	sLGR5_male	TLN1
0.0237691	0.103364	0.304	0.236	1	sLGR5_male	SPPL3
0.0238407	0.101417	0.364	0.296	1	sLGR5_male	DDX10
0.0242999	0.10103	0.204	0.158	1	sLGR5_male	ASAP3
0.0246819	0.143349	0.986	0.999	1	sLGR5_male	RPS23
0.0249161	0.131173	0.857	0.838	1	sLGR5_male	PGRMC1
0.0249453	0.114266	0.775	0.751	1	sLGR5_male	ADH5
0.0250042	0.112649	0.311	0.265	1	sLGR5_male	CCAR2
0.0250449	0.105717	0.461	0.398	1	sLGR5_male	ARL6IP5
0.0253935	0.105707	0.307	0.268	1	sLGR5_male	PRPS1
0.0259449	0.10629	0.75	0.723	1	sLGR5_male	LAMTOR5
0.0270469	0.109829	0.446	0.398	1	sLGR5_male	SRP54
0.0272521	0.106336	0.218	0.175	1	sLGR5_male	NFATC4
0.0278464	0.101285	0.321	0.277	1	sLGR5_male	STYXL1
0.028035	0.101345	0.339	0.287	1	sLGR5_male	DELE1
0.0281592	0.113516	0.493	0.452	1	sLGR5_male	FADS2
0.028286	0.106269	0.532	0.498	1	sLGR5_male	MRPL21
0.0289499	0.118433	0.204	0.172	1	sLGR5_male	ARHGEF1
0.0291489	0.10297	0.632	0.585	1	sLGR5_male	EIF4B
0.0293935	0.126155	0.296	0.244	1	sLGR5_male	CAMK2N1
0.0295158	0.116645	0.296	0.261	1	sLGR5_male	NAV2
0.0297129	0.142107	0.479	0.426	1	sLGR5_male	KDM5A
0.0297203	0.104451	0.632	0.572	1	sLGR5_male	SRSF1
0.0309093	0.110023	0.214	0.171	1	sLGR5_male	KIAA0895L
0.030962	0.118115	0.689	0.671	1	sLGR5_male	TERF2IP
0.0322169	0.101246	0.65	0.612	1	sLGR5_male	PFDN1
0.0337713	0.105107	0.35	0.299	1	sLGR5_male	POR
0.0341228	0.106863	0.289	0.256	1	sLGR5_male	MPZL1
0.0346835	0.100067	0.279	0.225	1	sLGR5_male	CRTC3
0.0348939	0.139922	0.404	0.384	1	sLGR5_male	KATNBL1
0.0349813	0.112014	0.279	0.231	1	sLGR5_male	HARS2
0.0358611	0.131838	0.479	0.438	1	sLGR5_male	CCNL2
0.0360303	0.119492	0.646	0.632	1	sLGR5_male	TOMM20
0.0368344	0.110442	0.293	0.267	1	sLGR5_male	PLEKHB2
0.0376114	0.107465	0.789	0.763	1	sLGR5_male	TXN
0.0377738	0.121632	0.211	0.18	1	sLGR5_male	CSK
0.0383037	0.151379	0.407	0.377	1	sLGR5_male	PEG3
0.0385418	0.117445	0.632	0.607	1	sLGR5_male	RAB34
0.0393782	0.121921	0.329	0.296	1	sLGR5_male	TLE4
0.040289	0.114164	0.729	0.689	1	sLGR5_male	MARCKS
0.040786	0.114143	0.229	0.187	1	sLGR5_male	PTPN11
0.0412774	0.116944	0.332	0.3	1	sLGR5_male	ZNF3
0.0440215	0.101201	0.629	0.58	1	sLGR5_male	C1orf43
0.0455711	0.104997	0.993	0.998	1	sLGR5_male	RACK1
0.0460088	0.106673	0.925	0.947	1	sLGR5_male	EEF1B2
0.0462795	0.102684	0.961	0.979	1	sLGR5_male	SUMO2
0.0468892	0.146389	0.443	0.415	1	sLGR5_male	HUWE1
0.0477319	0.109748	0.457	0.425	1	sLGR5_male	WDR6
0.0486585	0.100049	0.525	0.462	1	sLGR5_male	PSMD11
0.0489288	0.101242	0.361	0.314	1	sLGR5_male	DDR1
0.0501892	0.150388	0.629	0.621	1	sLGR5_male	RBBP6
0.0504123	0.1201	0.918	0.955	1	sLGR5_male	UBB
0.0525412	0.107927	0.357	0.322	1	sLGR5_male	CCNT2
0.0526787	0.121887	0.436	0.397	1	sLGR5_male	CDH2
0.0534186	0.101886	0.832	0.798	1	sLGR5_male	HNRNPR
0.0539367	0.10964	0.443	0.411	1	sLGR5_male	ETNK1
0.054463	0.136044	0.932	0.964	1	sLGR5_male	YBX1
0.0552568	0.110286	0.243	0.229	1	sLGR5_male	LZTS2
0.057297	0.101718	0.414	0.359	1	sLGR5_male	NOTCH2
0.0589073	0.135501	0.532	0.484	1	sLGR5_male	FABP5
0.0590244	0.124143	0.236	0.202	1	sLGR5_male	HIST1H1C
0.0604189	0.130243	0.225	0.181	1	sLGR5_male	LGALS1
0.0614443	0.116796	0.668	0.642	1	sLGR5_male	ZNF207
0.0616132	0.111051	0.411	0.381	1	sLGR5_male	OGA
0.062199	0.12685	0.307	0.28	1	sLGR5_male	RRP1B
0.063702	0.111628	0.386	0.365	1	sLGR5_male	PARVA
0.0640447	0.104545	0.282	0.234	1	sLGR5_male	FAM161A
0.0644467	0.107526	0.314	0.278	1	sLGR5_male	VKORC1
0.0671219	0.101645	0.35	0.326	1	sLGR5_male	RSBN1
0.0684976	0.103183	0.318	0.28	1	sLGR5_male	SUPT6H
0.069045	0.111086	0.296	0.271	1	sLGR5_male	SBNO1
0.0699393	0.102309	0.229	0.194	1	sLGR5_male	ZNF697
0.0713588	0.130279	0.296	0.26	1	sLGR5_male	CTTN
0.0715519	0.101213	0.325	0.281	1	sLGR5_male	RAB8A
0.0719936	0.105812	0.632	0.621	1	sLGR5_male	IMPDH2
0.0765701	0.111266	0.375	0.344	1	sLGR5_male	NISCH
0.0769557	0.103786	0.996	0.998	1	sLGR5_male	ACTB
0.0772958	0.113524	0.861	0.87	1	sLGR5_male	NDFIP1
0.0776362	0.111548	0.396	0.375	1	sLGR5_male	UBA6
0.0776468	0.111069	0.5	0.466	1	sLGR5_male	CRTAP
0.0802608	0.112688	0.282	0.265	1	sLGR5_male	APPL2
0.0804234	0.117788	0.471	0.449	1	sLGR5_male	BRWD1
0.0819824	0.112468	0.429	0.398	1	sLGR5_male	SMARCC2
0.0838499	0.120327	0.379	0.366	1	sLGR5_male	HPRT1
0.0873013	0.112115	0.518	0.489	1	sLGR5_male	UBA1
0.089888	0.111426	0.389	0.368	1	sLGR5_male	STARD7
0.0915446	0.103958	0.4	0.38	1	sLGR5_male	CIAO1
0.0920913	0.109224	0.307	0.294	1	sLGR5_male	SUPT5H
0.09634	0.116662	0.468	0.435	1	sLGR5_male	TCAF1
0.0965179	0.121934	0.489	0.454	1	sLGR5_male	SNRNP200
0.100198	0.124853	0.432	0.411	1	sLGR5_male	C8orf33
0.10319	0.107528	0.468	0.452	1	sLGR5_male	IMMP2L
0.110648	0.106394	0.479	0.459	1	sLGR5_male	PXDN
0.112489	0.126665	0.661	0.65	1	sLGR5_male	TGIF1
0.126446	0.108196	0.257	0.246	1	sLGR5_male	AKT2
0.133127	0.113743	0.464	0.44	1	sLGR5_male	ERP44
0.148298	0.107585	0.821	0.85	1	sLGR5_male	NUCKS1
0.149153	0.112955	0.954	0.989	1	sLGR5_male	PPDPF
0.154492	0.102075	0.275	0.249	1	sLGR5_male	SUN1
0.212244	0.101326	0.389	0.377	1	sLGR5_male	USP47
0.239482	0.102891	0.904	0.946	1	sLGR5_male	NDUFA4
0.258823	0.132113	0.996	0.998	1	sLGR5_male	MALAT1
0.344498	0.165146	0.654	0.668	1	sLGR5_male	CDKN1C
0.357183	0.122538	0.6	0.595	1	sLGR5_male	MAP4K4
0.425375	0.120243	0.514	0.546	1	sLGR5_male	ZNF292
1.9866e-159	1.16488	0.999	0.961	5.60816e-155	sLGR5_female	RPS26
1.51664e-92	1.6941	0.843	0.25	4.28148e-88	sLGR5_female	IFI6
2.48762e-89	0.901149	0.579	0	7.02255e-85	sLGR5_female	XIST
4.74952e-68	1.2563	0.941	0.639	1.34079e-63	sLGR5_female	KRT18
1.37656e-63	1.03081	0.941	0.639	3.88602e-59	sLGR5_female	B2M
1.16172e-52	0.948501	0.768	0.314	3.27952e-48	sLGR5_female	LRRN3
1.72829e-52	0.410869	1	0.982	4.87895e-48	sLGR5_female	RPS4X
3.07529e-51	1.01121	0.457	0.036	8.68155e-47	sLGR5_female	CAV1
1.6891e-49	0.74665	0.976	0.846	4.76833e-45	sLGR5_female	LY6E
6.88647e-49	0.869591	0.895	0.543	1.94405e-44	sLGR5_female	TAC1
6.32972e-45	0.800845	0.811	0.443	1.78688e-40	sLGR5_female	BCAM
1.41119e-44	0.471673	0.376	0.004	3.98378e-40	sLGR5_female	GSTM1
7.63392e-42	0.609932	0.949	0.75	2.15506e-37	sLGR5_female	SPINT2
8.0398e-42	0.403323	1	0.989	2.26964e-37	sLGR5_female	FTH1
3.04479e-41	0.840303	0.566	0.143	8.59543e-37	sLGR5_female	PRSS23
3.52259e-41	0.762568	0.58	0.15	9.94428e-37	sLGR5_female	SLC1A3
5.06293e-40	0.89647	0.743	0.354	1.42927e-35	sLGR5_female	PHLDA1
1.90429e-33	0.878535	0.462	0.086	5.37581e-29	sLGR5_female	IFITM1
1.03507e-32	0.722466	0.942	0.818	2.92201e-28	sLGR5_female	KRT8
9.16459e-32	0.641325	0.393	0.061	2.58716e-27	sLGR5_female	TXNIP
1.87405e-31	0.735377	0.593	0.225	5.29043e-27	sLGR5_female	S100A6
6.40062e-31	0.621012	0.787	0.521	1.8069e-26	sLGR5_female	TMEM14B
8.42978e-31	0.63618	0.356	0.046	2.37973e-26	sLGR5_female	STC1
1.06966e-30	0.610784	0.582	0.232	3.01966e-26	sLGR5_female	TM7SF2
9.38233e-30	0.558447	0.566	0.218	2.64863e-25	sLGR5_female	LINC01116
4.11278e-29	0.605524	0.933	0.879	1.16104e-24	sLGR5_female	GATM
4.51149e-29	0.54695	0.997	0.989	1.27359e-24	sLGR5_female	NPY
2.23166e-28	0.673	0.39	0.093	6.29997e-24	sLGR5_female	HLA-C
2.56775e-28	1.13148	0.456	0.189	7.24875e-24	sLGR5_female	EEF1G
3.24743e-28	0.868669	0.313	0.046	9.1675e-24	sLGR5_female	HLA-B
7.64213e-28	0.468286	0.956	0.843	2.15737e-23	sLGR5_female	ITM2B
7.66761e-28	0.450647	0.989	0.946	2.16457e-23	sLGR5_female	CALM2
9.57526e-28	0.591487	0.296	0.025	2.70309e-23	sLGR5_female	FOXL2
1.35419e-27	0.634548	0.71	0.396	3.82288e-23	sLGR5_female	CTSL
1.60879e-27	0.531688	0.567	0.236	4.54162e-23	sLGR5_female	DMKN
3.12607e-27	0.709538	0.643	0.336	8.82489e-23	sLGR5_female	PRSS35
3.58382e-27	0.43827	0.254	0.014	1.01171e-22	sLGR5_female	TNFRSF1B
6.72196e-27	0.491589	0.391	0.082	1.89761e-22	sLGR5_female	CCKBR
1.24015e-26	0.531808	0.914	0.764	3.50095e-22	sLGR5_female	RSRP1
1.9761e-26	0.605059	0.656	0.364	5.57854e-22	sLGR5_female	C1orf122
2.20972e-26	0.386896	0.998	0.939	6.23804e-22	sLGR5_female	SPRR2F
2.72973e-26	0.558422	0.581	0.257	7.70603e-22	sLGR5_female	CAB39L
6.74562e-26	0.459571	0.258	0.018	1.90429e-21	sLGR5_female	STXBP6
1.7786e-25	0.910591	0.956	0.911	5.021e-21	sLGR5_female	RPL26
2.20729e-25	0.427222	0.284	0.029	6.23118e-21	sLGR5_female	KIAA1324
2.62052e-25	0.846204	0.568	0.25	7.39773e-21	sLGR5_female	CRYM
2.13924e-24	0.597494	0.709	0.439	6.03906e-20	sLGR5_female	FBXO21
3.26229e-24	0.478989	0.546	0.211	9.20944e-20	sLGR5_female	NRXN3
3.81663e-24	0.462925	0.314	0.054	1.07743e-19	sLGR5_female	C2orf40
1.03738e-23	0.608718	0.473	0.182	2.92852e-19	sLGR5_female	PCSK1N
1.11963e-23	0.516564	0.407	0.118	3.16073e-19	sLGR5_female	MAF
1.47726e-23	0.510585	0.773	0.539	4.17031e-19	sLGR5_female	IFITM2
1.72431e-23	0.620618	0.536	0.268	4.86773e-19	sLGR5_female	NDUFA13
3.29719e-23	0.336406	0.991	0.961	9.30796e-19	sLGR5_female	MYL6
1.15332e-22	0.553443	0.54	0.254	3.25581e-18	sLGR5_female	BCAT1
2.03904e-22	0.455293	0.383	0.096	5.7562e-18	sLGR5_female	SLC16A10
3.15312e-22	0.462314	0.98	0.95	8.90126e-18	sLGR5_female	BTG1
4.09019e-22	0.581596	0.71	0.446	1.15466e-17	sLGR5_female	ARL4D
5.64632e-22	0.623569	0.719	0.471	1.59396e-17	sLGR5_female	LYPD1
6.69746e-22	0.43712	0.747	0.475	1.89069e-17	sLGR5_female	CD151
7.76326e-22	0.474108	0.382	0.1	2.19157e-17	sLGR5_female	PHLDB2
7.81065e-22	0.520078	0.555	0.257	2.20495e-17	sLGR5_female	EPCAM
1.07827e-21	0.495248	0.78	0.557	3.04396e-17	sLGR5_female	HIST1H4C
1.78461e-21	0.481525	0.428	0.154	5.03794e-17	sLGR5_female	RPS10
1.83797e-21	0.493225	0.308	0.071	5.1886e-17	sLGR5_female	CRNDE
2.61419e-21	0.44273	0.426	0.139	7.37987e-17	sLGR5_female	TESC
2.78904e-21	0.443497	0.508	0.236	7.87347e-17	sLGR5_female	TSTD1
3.27074e-21	0.428687	0.635	0.346	9.2333e-17	sLGR5_female	DHRS4
3.74802e-21	0.519458	0.482	0.2	1.05807e-16	sLGR5_female	LY6H
3.9532e-21	0.445634	0.949	0.836	1.11599e-16	sLGR5_female	HMGN3
4.21809e-21	0.361505	0.955	0.864	1.19077e-16	sLGR5_female	MYL12B
6.77796e-21	0.485827	0.349	0.089	1.91342e-16	sLGR5_female	RELN
1.07442e-20	0.455228	0.43	0.164	3.0331e-16	sLGR5_female	CCDC170
1.28123e-20	0.462539	0.888	0.689	3.61691e-16	sLGR5_female	SPARC
1.78491e-20	0.577793	0.64	0.411	5.03879e-16	sLGR5_female	PTN
1.9691e-20	0.494874	0.631	0.357	5.55878e-16	sLGR5_female	CEMIP2
2.20309e-20	0.725604	0.271	0.046	6.21932e-16	sLGR5_female	CEBPD
2.55525e-20	0.675114	0.309	0.071	7.21347e-16	sLGR5_female	NR4A1
2.89106e-20	0.539658	0.311	0.068	8.16147e-16	sLGR5_female	MT3
3.74976e-20	0.511309	0.657	0.407	1.05856e-15	sLGR5_female	SELENOP
6.46278e-20	0.497764	0.963	0.839	1.82444e-15	sLGR5_female	IFITM3
8.56207e-20	0.626351	0.44	0.182	2.41707e-15	sLGR5_female	C15orf48
1.09862e-19	0.386273	0.313	0.064	3.10141e-15	sLGR5_female	CYP4X1
1.10389e-19	0.376612	0.856	0.661	3.1163e-15	sLGR5_female	NDUFB2
1.49432e-19	0.582647	0.303	0.057	4.21847e-15	sLGR5_female	IFI44L
1.74489e-19	0.48857	0.307	0.068	4.92583e-15	sLGR5_female	OSR1
1.96641e-19	0.529914	0.793	0.607	5.55118e-15	sLGR5_female	C4orf48
2.86474e-19	0.401902	0.739	0.479	8.08716e-15	sLGR5_female	AKR1B1
5.35644e-19	0.369777	0.296	0.054	1.51212e-14	sLGR5_female	KCNIP4
5.53005e-19	0.465652	0.723	0.511	1.56113e-14	sLGR5_female	HRASLS
1.05064e-18	0.428979	0.905	0.786	2.96596e-14	sLGR5_female	TXNDC17
1.28134e-18	0.311031	0.212	0.025	3.61723e-14	sLGR5_female	PIFO
1.29192e-18	0.436239	0.506	0.225	3.64708e-14	sLGR5_female	NFIA
1.62739e-18	0.516042	0.558	0.311	4.59411e-14	sLGR5_female	FLRT3
3.60868e-18	0.337325	0.235	0.036	1.01873e-13	sLGR5_female	GIPC2
3.95522e-18	0.362737	0.866	0.686	1.11656e-13	sLGR5_female	ROMO1
4.53944e-18	0.563211	0.364	0.114	1.28148e-13	sLGR5_female	CPA2
4.96408e-18	0.39251	0.423	0.161	1.40136e-13	sLGR5_female	CD47
7.3558e-18	0.536008	0.382	0.143	2.07654e-13	sLGR5_female	ABCA9-AS1
9.14402e-18	0.426649	0.438	0.193	2.58136e-13	sLGR5_female	SLC40A1
1.33676e-17	0.442011	0.437	0.2	3.77368e-13	sLGR5_female	RHOC
1.76366e-17	0.452262	0.667	0.425	4.9788e-13	sLGR5_female	PDRG1
1.80412e-17	0.411507	0.461	0.218	5.09302e-13	sLGR5_female	MED31
1.85173e-17	0.410088	0.842	0.686	5.22742e-13	sLGR5_female	POLR2L
2.08678e-17	0.443979	0.773	0.604	5.89098e-13	sLGR5_female	SNRPN
2.25464e-17	0.339859	0.308	0.075	6.36485e-13	sLGR5_female	ARL2
2.53898e-17	0.498926	0.636	0.421	7.16754e-13	sLGR5_female	REXO2
3.06796e-17	0.413593	0.493	0.236	8.66086e-13	sLGR5_female	NDUFA11
3.70417e-17	0.325337	0.29	0.061	1.04569e-12	sLGR5_female	TRPM3
5.31166e-17	0.603443	0.831	0.657	1.49948e-12	sLGR5_female	SAT1
5.82523e-17	0.413251	0.472	0.218	1.64446e-12	sLGR5_female	IL6ST
1.04608e-16	0.482265	0.731	0.525	2.9531e-12	sLGR5_female	CALD1
1.04882e-16	0.348924	0.24	0.043	2.96081e-12	sLGR5_female	PKP2
2.47821e-16	0.345421	0.388	0.139	6.99597e-12	sLGR5_female	SDHD
4.28572e-16	0.807932	0.683	0.564	1.20986e-11	sLGR5_female	EGR1
5.10767e-16	0.860403	0.843	0.811	1.44189e-11	sLGR5_female	RPL17
1.68877e-15	0.32679	0.236	0.046	4.76741e-11	sLGR5_female	PLSCR4
1.91069e-15	0.342558	0.216	0.046	5.39389e-11	sLGR5_female	GCNT1
2.20312e-15	0.502617	0.258	0.061	6.21942e-11	sLGR5_female	ISG15
3.35624e-15	0.394145	0.518	0.282	9.47467e-11	sLGR5_female	ARMT1
4.06677e-15	0.317949	0.239	0.054	1.14805e-10	sLGR5_female	SH2D4A
5.32518e-15	0.358499	0.728	0.507	1.5033e-10	sLGR5_female	TCEA3
5.39066e-15	0.554658	0.608	0.371	1.52178e-10	sLGR5_female	AHNAK
6.35231e-15	0.330537	0.797	0.614	1.79326e-10	sLGR5_female	N4BP2L2
6.4465e-15	0.372627	0.721	0.507	1.81985e-10	sLGR5_female	NEDD8
7.56342e-15	0.348252	0.947	0.9	2.13515e-10	sLGR5_female	NDUFS5
8.36749e-15	0.454323	0.77	0.586	2.36214e-10	sLGR5_female	ARL4A
8.51169e-15	0.327513	0.34	0.129	2.40285e-10	sLGR5_female	BORCS7
1.047e-14	0.379501	0.639	0.407	2.95569e-10	sLGR5_female	LGALS3BP
1.34109e-14	0.375005	0.402	0.182	3.78591e-10	sLGR5_female	PLSCR1
1.89874e-14	1.07589	0.241	0.079	5.36015e-10	sLGR5_female	IFI27
2.25019e-14	0.44334	0.368	0.175	6.35229e-10	sLGR5_female	RNASEK
2.40707e-14	0.494628	0.667	0.446	6.79515e-10	sLGR5_female	DSEL
2.46239e-14	0.531337	0.456	0.261	6.95134e-10	sLGR5_female	MIR202HG
2.57593e-14	0.424209	0.515	0.307	7.27184e-10	sLGR5_female	ARL6IP1
4.95622e-14	0.42125	0.982	0.986	1.39914e-09	sLGR5_female	MDK
5.26597e-14	0.334198	0.598	0.364	1.48658e-09	sLGR5_female	JPX
6.12844e-14	0.292675	0.212	0.046	1.73006e-09	sLGR5_female	PRSS8
6.33168e-14	0.401928	0.461	0.243	1.78743e-09	sLGR5_female	CAV2
7.12843e-14	0.361197	0.206	0.05	2.01236e-09	sLGR5_female	BEX5
9.68657e-14	0.55228	0.233	0.064	2.73452e-09	sLGR5_female	ATF3
1.00672e-13	0.53994	0.716	0.564	2.84196e-09	sLGR5_female	CPE
1.05601e-13	0.372721	0.587	0.368	2.98112e-09	sLGR5_female	SEC14L1
1.10226e-13	0.392294	0.618	0.407	3.11169e-09	sLGR5_female	ASS1
1.25736e-13	0.517367	0.913	0.832	3.54953e-09	sLGR5_female	HSPB1
1.26856e-13	0.360848	0.462	0.239	3.58115e-09	sLGR5_female	DUBR
1.34808e-13	0.316079	0.861	0.707	3.80564e-09	sLGR5_female	TOMM7
1.56413e-13	0.432068	0.694	0.507	4.41554e-09	sLGR5_female	NSG1
1.66721e-13	0.365111	0.763	0.579	4.70655e-09	sLGR5_female	FAM210B
2.02859e-13	0.338245	0.669	0.468	5.72671e-09	sLGR5_female	SIVA1
2.88782e-13	0.484228	0.516	0.339	8.15232e-09	sLGR5_female	RPS17
3.67942e-13	0.315076	0.317	0.104	1.0387e-08	sLGR5_female	FAM184A
4.06435e-13	0.396611	0.422	0.204	1.14737e-08	sLGR5_female	COL14A1
4.23557e-13	0.394714	0.302	0.1	1.1957e-08	sLGR5_female	GABRA2
4.85618e-13	0.410921	0.29	0.111	1.3709e-08	sLGR5_female	STAT1
5.87996e-13	0.323512	0.785	0.625	1.65991e-08	sLGR5_female	FKBP2
9.73646e-13	0.68209	0.476	0.304	2.7486e-08	sLGR5_female	ZFP36
1.23398e-12	0.30419	0.328	0.136	3.48352e-08	sLGR5_female	NAA10
1.29745e-12	0.306677	0.204	0.05	3.66271e-08	sLGR5_female	FXYD7
1.68932e-12	0.321684	0.879	0.757	4.76894e-08	sLGR5_female	NPC2
1.77427e-12	0.253943	0.246	0.068	5.00878e-08	sLGR5_female	TMBIM4
1.87024e-12	0.295048	0.805	0.621	5.27969e-08	sLGR5_female	PSME1
2.34841e-12	0.350282	0.606	0.386	6.62957e-08	sLGR5_female	FHIT
2.39141e-12	0.404056	0.793	0.65	6.75095e-08	sLGR5_female	HLA-A
2.48881e-12	0.2425	0.242	0.061	7.02591e-08	sLGR5_female	DACH1
2.73717e-12	0.31118	0.252	0.089	7.72704e-08	sLGR5_female	RIC3
4.2813e-12	0.37211	0.403	0.211	1.20861e-07	sLGR5_female	FEZ1
4.36419e-12	0.393552	0.834	0.725	1.23201e-07	sLGR5_female	ATP5IF1
4.86648e-12	0.324051	0.417	0.2	1.37381e-07	sLGR5_female	IL11RA
5.40271e-12	0.302552	0.504	0.257	1.52519e-07	sLGR5_female	ANOS1
6.4406e-12	0.280858	0.244	0.075	1.81818e-07	sLGR5_female	FAM20A
6.67043e-12	0.254109	0.933	0.836	1.88306e-07	sLGR5_female	PEBP1
7.8021e-12	0.513711	0.434	0.257	2.20253e-07	sLGR5_female	FOSB
1.05779e-11	0.196423	0.998	0.993	2.98613e-07	sLGR5_female	RPS18
1.1694e-11	0.3241	0.816	0.714	3.30123e-07	sLGR5_female	UQCR11
1.32151e-11	0.285045	0.771	0.596	3.73063e-07	sLGR5_female	FAM96B
1.48217e-11	0.205324	0.984	0.929	4.18415e-07	sLGR5_female	GSTP1
1.70037e-11	0.307978	0.894	0.8	4.80015e-07	sLGR5_female	PRDX5
1.71877e-11	0.336311	0.723	0.575	4.85208e-07	sLGR5_female	ATP6V0E1
1.8279e-11	0.499086	0.817	0.757	5.16017e-07	sLGR5_female	RPL36A
1.98344e-11	0.313192	0.678	0.486	5.59924e-07	sLGR5_female	PNKD
1.99594e-11	0.288231	0.341	0.154	5.63454e-07	sLGR5_female	CTSF
2.14254e-11	0.36288	0.861	0.732	6.04839e-07	sLGR5_female	ISYNA1
2.29614e-11	0.428567	0.534	0.343	6.48199e-07	sLGR5_female	ARHGAP29
2.43429e-11	0.324197	0.576	0.389	6.872e-07	sLGR5_female	CMIP
2.50083e-11	0.281265	0.31	0.129	7.05985e-07	sLGR5_female	SYNGR2
2.52565e-11	0.339351	0.367	0.164	7.1299e-07	sLGR5_female	KITLG
3.2649e-11	0.313104	0.615	0.421	9.21682e-07	sLGR5_female	PCBD1
3.31505e-11	0.332405	0.503	0.311	9.35839e-07	sLGR5_female	MAT2A
3.47796e-11	0.300731	0.404	0.207	9.81828e-07	sLGR5_female	GINM1
3.78484e-11	0.315928	0.73	0.546	1.06846e-06	sLGR5_female	EPHX1
5.10008e-11	0.318247	0.477	0.279	1.43975e-06	sLGR5_female	TMEM14A
5.2379e-11	0.618311	0.537	0.389	1.47866e-06	sLGR5_female	BTG2
6.82717e-11	0.331742	0.39	0.211	1.92731e-06	sLGR5_female	IFI16
7.05392e-11	0.317815	0.461	0.271	1.99132e-06	sLGR5_female	NUDT16L1
7.17318e-11	0.280702	0.307	0.118	2.02499e-06	sLGR5_female	USP6NL
7.35083e-11	0.391932	0.388	0.239	2.07514e-06	sLGR5_female	CSNK2B
8.09543e-11	0.293423	0.519	0.314	2.28534e-06	sLGR5_female	EML4
8.39669e-11	0.221893	0.247	0.071	2.37039e-06	sLGR5_female	FN3K
9.35063e-11	0.280047	0.363	0.157	2.63968e-06	sLGR5_female	RAB38
9.64545e-11	0.297705	0.63	0.443	2.72291e-06	sLGR5_female	C7orf50
1.21751e-10	0.297625	0.441	0.246	3.43702e-06	sLGR5_female	NPDC1
1.69932e-10	0.256022	0.895	0.814	4.79718e-06	sLGR5_female	TMEM50A
1.74972e-10	0.302217	0.358	0.171	4.93946e-06	sLGR5_female	ADRA2A
1.7915e-10	0.235234	0.264	0.086	5.0574e-06	sLGR5_female	SGCD
1.87212e-10	0.259182	0.32	0.136	5.285e-06	sLGR5_female	THUMPD3-AS1
1.94163e-10	0.253839	0.255	0.089	5.48123e-06	sLGR5_female	NFIC
2.30199e-10	0.196666	0.997	0.979	6.49853e-06	sLGR5_female	RPS27
2.35174e-10	0.344762	0.73	0.604	6.63897e-06	sLGR5_female	MRPL33
2.6554e-10	0.284385	0.941	0.875	7.4962e-06	sLGR5_female	NAP1L1
2.81762e-10	0.282409	0.688	0.514	7.95414e-06	sLGR5_female	EIF1AX
3.31631e-10	0.287402	0.57	0.386	9.36195e-06	sLGR5_female	AAMDC
3.74774e-10	0.268437	0.753	0.604	1.05799e-05	sLGR5_female	ATP6V0B
3.84895e-10	0.272263	0.38	0.179	1.08656e-05	sLGR5_female	IRS1
3.87026e-10	0.310139	0.595	0.404	1.09258e-05	sLGR5_female	GOLGB1
3.97389e-10	0.25558	0.265	0.107	1.12183e-05	sLGR5_female	HIGD1A
4.09011e-10	0.351964	0.324	0.161	1.15464e-05	sLGR5_female	AKR1C1
4.94414e-10	0.248828	0.326	0.15	1.39573e-05	sLGR5_female	PSENEN
5.04473e-10	0.324362	0.483	0.307	1.42413e-05	sLGR5_female	ECH1
6.20167e-10	0.320574	0.497	0.329	1.75073e-05	sLGR5_female	S100A16
6.20947e-10	0.228931	0.214	0.068	1.75293e-05	sLGR5_female	IFI44
6.26564e-10	0.235491	0.317	0.143	1.76879e-05	sLGR5_female	KRCC1
6.35218e-10	0.295817	0.397	0.229	1.79322e-05	sLGR5_female	PSMA1
6.86363e-10	0.295095	0.316	0.139	1.9376e-05	sLGR5_female	NPY1R
7.60272e-10	0.208555	0.952	0.879	2.14625e-05	sLGR5_female	COX5B
7.83287e-10	0.300067	0.666	0.518	2.21122e-05	sLGR5_female	PNRC2
7.99297e-10	0.353562	0.406	0.243	2.25642e-05	sLGR5_female	LRRC17
8.4734e-10	0.288829	0.372	0.189	2.39204e-05	sLGR5_female	SYCN
1.08661e-09	0.264258	0.781	0.639	3.0675e-05	sLGR5_female	PHPT1
1.11419e-09	0.285984	0.403	0.229	3.14535e-05	sLGR5_female	MINOS1
1.12644e-09	0.233251	0.235	0.071	3.17994e-05	sLGR5_female	KCND2
1.16839e-09	0.286955	0.353	0.193	3.29838e-05	sLGR5_female	LCA5
1.25202e-09	0.263912	0.343	0.164	3.53445e-05	sLGR5_female	TXLNG
1.28121e-09	0.252588	0.306	0.136	3.61686e-05	sLGR5_female	NHLRC3
1.36686e-09	0.244049	0.243	0.089	3.85864e-05	sLGR5_female	OLFM2
1.4759e-09	0.48797	0.251	0.121	4.16646e-05	sLGR5_female	DPEP1
1.54289e-09	0.26657	0.458	0.268	4.35559e-05	sLGR5_female	GCC2
1.58847e-09	0.250772	0.31	0.136	4.48425e-05	sLGR5_female	TMEM181
1.58929e-09	0.233147	0.255	0.096	4.48658e-05	sLGR5_female	ZC3HAV1
1.64037e-09	0.260239	0.361	0.175	4.63076e-05	sLGR5_female	GAS6
1.67806e-09	0.277197	0.737	0.6	4.73715e-05	sLGR5_female	ANAPC11
1.85165e-09	0.313655	0.499	0.307	5.22721e-05	sLGR5_female	SCG5
1.94089e-09	0.311953	0.319	0.157	5.47913e-05	sLGR5_female	HES4
1.96073e-09	0.241235	0.82	0.679	5.53515e-05	sLGR5_female	RAB2A
2.05793e-09	0.247441	0.727	0.557	5.80954e-05	sLGR5_female	C3orf58
2.38773e-09	0.302998	0.629	0.45	6.74055e-05	sLGR5_female	SUCO
2.39822e-09	0.232115	0.231	0.093	6.77018e-05	sLGR5_female	LLPH
3.00675e-09	0.197388	0.234	0.079	8.48805e-05	sLGR5_female	GCSH
3.02895e-09	0.253606	0.702	0.536	8.55071e-05	sLGR5_female	NDUFS6
3.12699e-09	0.259906	0.308	0.154	8.82751e-05	sLGR5_female	FMC1
3.28729e-09	0.185458	0.998	0.979	9.28003e-05	sLGR5_female	RPL39
3.48527e-09	0.241249	0.381	0.189	9.83891e-05	sLGR5_female	CDON
3.56654e-09	0.280671	0.349	0.189	0.000100683	sLGR5_female	CDCA7L
4.22698e-09	0.262835	0.298	0.154	0.000119328	sLGR5_female	NME1
4.55623e-09	0.210355	0.207	0.068	0.000128622	sLGR5_female	VAMP8
5.31891e-09	0.224091	0.356	0.161	0.000150153	sLGR5_female	AC008124.1
5.33502e-09	0.229504	0.702	0.532	0.000150607	sLGR5_female	BCLAF1
5.36961e-09	0.265999	0.314	0.154	0.000151584	sLGR5_female	COL4A2
5.45946e-09	0.245762	0.335	0.161	0.000154121	sLGR5_female	GLS
5.49887e-09	0.218077	0.289	0.121	0.000155233	sLGR5_female	MPC1
5.96324e-09	0.256781	0.416	0.225	0.000168342	sLGR5_female	CARMIL1
6.16507e-09	0.258188	0.349	0.182	0.00017404	sLGR5_female	RFK
6.9276e-09	0.271119	0.289	0.139	0.000195566	sLGR5_female	NOVA1
7.06203e-09	0.285945	0.668	0.536	0.000199361	sLGR5_female	APRT
7.09158e-09	0.240546	0.332	0.164	0.000200195	sLGR5_female	RBM23
7.65766e-09	0.279234	0.88	0.782	0.000216176	sLGR5_female	CST3
8.10225e-09	0.179599	1	0.982	0.000228726	sLGR5_female	RPL36
8.21964e-09	0.265738	0.748	0.621	0.00023204	sLGR5_female	SRSF5
9.52577e-09	0.321331	0.268	0.136	0.000268912	sLGR5_female	APOC1
1.0576e-08	0.259327	0.274	0.125	0.000298561	sLGR5_female	SPRY1
1.17779e-08	0.209863	0.909	0.804	0.000332489	sLGR5_female	RPL27A
1.20019e-08	0.290479	0.728	0.557	0.000338814	sLGR5_female	TCEAL2
1.29313e-08	0.221556	0.485	0.271	0.000365049	sLGR5_female	DMD
1.32122e-08	0.268369	0.633	0.475	0.000372981	sLGR5_female	SCP2
1.38632e-08	0.589691	0.551	0.457	0.000391357	sLGR5_female	APOE
1.58029e-08	0.254317	0.453	0.275	0.000446116	sLGR5_female	ETNK2
1.79727e-08	0.234554	0.327	0.15	0.000507368	sLGR5_female	LTBP2
2.01941e-08	0.234192	0.356	0.193	0.000570079	sLGR5_female	RMND1
2.05534e-08	0.420911	0.519	0.357	0.000580222	sLGR5_female	PROCR
2.05698e-08	0.207355	0.214	0.086	0.000580686	sLGR5_female	GATD3B
2.18207e-08	0.300984	0.624	0.479	0.000615999	sLGR5_female	ALDH9A1
2.18506e-08	0.258175	0.346	0.193	0.000616843	sLGR5_female	CYSTM1
2.34991e-08	0.272633	0.933	0.893	0.000663381	sLGR5_female	BST2
2.38041e-08	0.239238	0.891	0.807	0.000671989	sLGR5_female	SSR4
2.6697e-08	0.328158	0.555	0.429	0.000753656	sLGR5_female	PRKAR2B
2.99467e-08	0.204084	0.885	0.782	0.000845395	sLGR5_female	GPX4
3.15965e-08	0.255173	0.368	0.189	0.00089197	sLGR5_female	ITPR2
3.43028e-08	0.206706	0.219	0.082	0.000968369	sLGR5_female	EHD2
3.44935e-08	0.215224	0.203	0.079	0.000973751	sLGR5_female	EPS8L2
3.51042e-08	0.213389	0.993	0.989	0.000990992	sLGR5_female	RPS15A
3.55601e-08	0.297979	0.732	0.614	0.00100386	sLGR5_female	NPNT
3.69405e-08	0.366247	0.546	0.4	0.00104283	sLGR5_female	DNAJB4
3.80679e-08	0.301049	0.351	0.218	0.00107466	sLGR5_female	SARNP
4.03177e-08	0.227049	0.306	0.15	0.00113817	sLGR5_female	SACM1L
4.31382e-08	0.216215	0.223	0.082	0.00121779	sLGR5_female	MGST1
5.26604e-08	0.244929	0.699	0.561	0.0014866	sLGR5_female	TMEM141
5.68347e-08	0.272515	0.522	0.371	0.00160444	sLGR5_female	SWI5
5.90094e-08	0.224366	0.229	0.089	0.00166584	sLGR5_female	COL4A1
6.17968e-08	0.249201	0.234	0.114	0.00174452	sLGR5_female	WNT2B
6.29684e-08	0.23832	0.325	0.168	0.0017776	sLGR5_female	TVP23A
6.35847e-08	0.105198	0.749	0.925	0.001795	sLGR5_female	HSPA1A
6.78104e-08	0.222304	0.221	0.093	0.00191429	sLGR5_female	MYEF2
8.03815e-08	0.264051	0.777	0.668	0.00226917	sLGR5_female	CCS
8.28649e-08	0.160561	0.993	0.982	0.00233928	sLGR5_female	RPL35
9.48521e-08	0.226198	0.323	0.179	0.00267768	sLGR5_female	SNHG18
1.00415e-07	0.218034	0.272	0.125	0.00283473	sLGR5_female	ZNF814
1.033e-07	0.257579	0.768	0.664	0.00291615	sLGR5_female	PSMD9
1.10824e-07	0.236625	0.518	0.354	0.00312856	sLGR5_female	DPM3
1.10839e-07	0.235035	0.319	0.161	0.00312898	sLGR5_female	CDK6
1.12342e-07	0.222417	0.478	0.293	0.00317141	sLGR5_female	FAM200B
1.15484e-07	0.198523	0.259	0.118	0.00326012	sLGR5_female	TRIP6
1.16474e-07	0.237759	0.336	0.189	0.00328805	sLGR5_female	SMIM7
1.17695e-07	0.233245	0.692	0.55	0.00332254	sLGR5_female	TIA1
1.2085e-07	0.212074	0.558	0.382	0.0034116	sLGR5_female	RUNX1T1
1.59773e-07	0.200601	0.293	0.129	0.0045104	sLGR5_female	KDM6A
1.64886e-07	0.277084	0.435	0.289	0.00465472	sLGR5_female	MYADM
1.65033e-07	0.245142	0.936	0.886	0.00465887	sLGR5_female	FAM213A
1.7048e-07	0.209201	0.248	0.111	0.00481264	sLGR5_female	PDLIM5
1.76692e-07	0.21094	0.515	0.336	0.00498803	sLGR5_female	PCMTD1
1.78736e-07	0.184416	0.283	0.129	0.00504573	sLGR5_female	ARHGAP5
1.93055e-07	0.254958	0.533	0.386	0.00544993	sLGR5_female	RABAC1
1.96882e-07	0.19827	0.285	0.132	0.00555797	sLGR5_female	MIER1
1.98548e-07	0.182807	0.231	0.089	0.005605	sLGR5_female	RGS9
2.01236e-07	0.222468	0.232	0.1	0.00568088	sLGR5_female	FHDC1
2.17333e-07	0.169764	0.217	0.075	0.00613532	sLGR5_female	CNKSR1
2.19225e-07	0.266462	0.88	0.829	0.00618871	sLGR5_female	RPL22L1
2.31662e-07	0.221673	0.328	0.182	0.00653982	sLGR5_female	ZNF503-AS2
2.37978e-07	0.255106	0.436	0.3	0.00671811	sLGR5_female	LEPROT
2.5199e-07	0.244603	0.55	0.382	0.00711369	sLGR5_female	USP46
2.58868e-07	0.217373	0.808	0.679	0.00730785	sLGR5_female	DSTN
2.59074e-07	0.201117	0.299	0.139	0.00731365	sLGR5_female	GRM7
2.63597e-07	0.265572	0.79	0.696	0.00744136	sLGR5_female	COPE
2.72433e-07	0.242603	0.398	0.243	0.00769079	sLGR5_female	ISLR
2.75496e-07	0.237611	0.892	0.814	0.00777725	sLGR5_female	MYL12A
2.87116e-07	0.303472	0.502	0.35	0.00810528	sLGR5_female	COL6A2
2.94719e-07	0.260882	0.437	0.282	0.00831993	sLGR5_female	PEG10
3.08946e-07	0.216534	0.322	0.175	0.00872155	sLGR5_female	TRIP11
3.31042e-07	0.247591	0.518	0.375	0.00934532	sLGR5_female	LRPAP1
3.39417e-07	0.238402	0.294	0.175	0.00958175	sLGR5_female	CMBL
3.65177e-07	0.120611	0.998	0.993	0.0103089	sLGR5_female	RPL28
3.7204e-07	0.237909	0.57	0.407	0.0105027	sLGR5_female	TM9SF2
3.80747e-07	0.180198	0.906	0.836	0.0107485	sLGR5_female	CD63
3.84587e-07	0.231	0.515	0.361	0.0108569	sLGR5_female	MRPL28
3.93852e-07	0.207651	0.256	0.125	0.0111184	sLGR5_female	CAVIN3
4.21325e-07	0.307947	0.462	0.307	0.011894	sLGR5_female	EPSTI1
4.29894e-07	0.225454	0.607	0.454	0.0121359	sLGR5_female	POLR2I
4.91065e-07	0.20378	0.761	0.629	0.0138628	sLGR5_female	UQCC2
5.44105e-07	0.136853	1	0.986	0.0153601	sLGR5_female	TMSB10
5.74053e-07	0.271392	0.45	0.311	0.0162055	sLGR5_female	GOLGA4
6.09387e-07	0.240889	0.46	0.318	0.017203	sLGR5_female	ZNF302
6.15358e-07	0.241777	0.465	0.304	0.0173716	sLGR5_female	TUBB2A
6.33029e-07	0.207019	0.805	0.696	0.0178704	sLGR5_female	DYNLT1
6.58693e-07	0.244961	0.41	0.254	0.0185949	sLGR5_female	ELMO1
6.62247e-07	0.242122	0.564	0.432	0.0186952	sLGR5_female	AKR7A2
7.19072e-07	0.232684	0.294	0.164	0.0202994	sLGR5_female	A4GALT
7.43183e-07	0.235436	0.676	0.539	0.0209801	sLGR5_female	CHCHD10
7.6711e-07	0.171901	0.944	0.875	0.0216555	sLGR5_female	OST4
7.82424e-07	0.195652	0.22	0.096	0.0220878	sLGR5_female	FRMD4B
8.03587e-07	0.228485	0.529	0.382	0.0226852	sLGR5_female	DBI
8.41958e-07	0.214424	0.309	0.171	0.0237685	sLGR5_female	ME1
8.69309e-07	0.186153	0.953	0.914	0.0245406	sLGR5_female	ARF5
8.83604e-07	0.242825	0.54	0.386	0.0249441	sLGR5_female	NFIB
8.94957e-07	0.169129	0.214	0.079	0.0252646	sLGR5_female	ATXN1
9.80434e-07	0.1975	0.317	0.164	0.0276777	sLGR5_female	HAT1
1.10776e-06	0.197998	0.366	0.214	0.031272	sLGR5_female	SDCCAG8
1.10977e-06	0.212778	0.455	0.289	0.0313288	sLGR5_female	CD46
1.18051e-06	0.229543	0.485	0.336	0.0333257	sLGR5_female	MRPL18
1.22265e-06	0.16295	0.206	0.089	0.0345155	sLGR5_female	HSD17B8
1.28544e-06	0.283294	0.416	0.307	0.036288	sLGR5_female	CDK2AP1
1.31266e-06	0.16056	0.21	0.089	0.0370564	sLGR5_female	CSTF3
1.35695e-06	0.26222	0.25	0.139	0.0383068	sLGR5_female	TMEM159
1.4191e-06	0.199163	0.356	0.207	0.0400613	sLGR5_female	USP8
1.43349e-06	0.238204	0.754	0.646	0.0404675	sLGR5_female	C12orf57
1.4471e-06	0.232376	0.609	0.464	0.0408515	sLGR5_female	GRN
1.50895e-06	0.555981	0.497	0.414	0.0425975	sLGR5_female	CYR61
1.54184e-06	0.267773	0.637	0.525	0.0435261	sLGR5_female	CCNL1
1.60661e-06	0.173629	0.256	0.118	0.0453545	sLGR5_female	ZBED5
1.73199e-06	0.234285	0.612	0.471	0.0488942	sLGR5_female	CPVL
1.78955e-06	0.221636	0.566	0.414	0.0505191	sLGR5_female	GPBP1
1.79254e-06	0.191256	0.294	0.154	0.0506035	sLGR5_female	AK6
1.83022e-06	0.204533	0.496	0.336	0.0516672	sLGR5_female	NME3
1.84027e-06	0.241501	0.355	0.207	0.0519509	sLGR5_female	MAN2A1
1.84401e-06	0.211186	0.24	0.114	0.0520564	sLGR5_female	AEBP1
1.94225e-06	0.22888	0.878	0.829	0.0548297	sLGR5_female	CTNNAL1
1.9572e-06	0.228394	0.999	0.989	0.0552517	sLGR5_female	MT-ND3
2.00233e-06	0.17417	0.315	0.168	0.0565259	sLGR5_female	ATG101
2.04407e-06	0.193312	0.33	0.182	0.0577041	sLGR5_female	SLC38A1
2.06506e-06	0.189788	0.425	0.271	0.0582967	sLGR5_female	AGL
2.24627e-06	0.326406	0.448	0.339	0.0634121	sLGR5_female	COL6A1
2.27378e-06	0.199414	0.36	0.221	0.0641887	sLGR5_female	TRAPPC6A
2.37583e-06	0.228539	0.765	0.643	0.0670697	sLGR5_female	SREK1IP1
2.59754e-06	0.215329	0.516	0.379	0.0733285	sLGR5_female	BAD
2.64173e-06	0.198698	0.354	0.218	0.0745762	sLGR5_female	DNPH1
2.78928e-06	0.208027	0.292	0.161	0.0787414	sLGR5_female	ECHDC2
2.83528e-06	0.219952	0.586	0.461	0.08004	sLGR5_female	TXNDC12
2.94033e-06	0.225812	0.463	0.318	0.0830056	sLGR5_female	FREM2
2.94566e-06	0.20407	0.566	0.421	0.0831559	sLGR5_female	ZNF667-AS1
3.01427e-06	0.173061	0.23	0.107	0.0850929	sLGR5_female	RNF19A
3.02225e-06	0.213759	0.25	0.139	0.0853182	sLGR5_female	FRAS1
3.21995e-06	0.211707	0.609	0.461	0.0908993	sLGR5_female	PKIG
3.36452e-06	0.223521	0.422	0.289	0.0949804	sLGR5_female	CDC26
3.39233e-06	0.238264	0.421	0.293	0.0957654	sLGR5_female	CCDC85B
3.54123e-06	0.179201	0.257	0.139	0.099969	sLGR5_female	TRIQK
3.61055e-06	0.227956	0.5	0.357	0.101926	sLGR5_female	NIFK
3.6183e-06	0.192015	0.36	0.218	0.102144	sLGR5_female	PREB
3.73686e-06	0.17305	0.312	0.168	0.105491	sLGR5_female	FAM45A
4.11099e-06	0.161622	0.243	0.114	0.116053	sLGR5_female	FAM221A
4.25143e-06	0.199207	0.365	0.218	0.120018	sLGR5_female	PRR15
4.28717e-06	0.222138	0.559	0.432	0.121027	sLGR5_female	TPD52L1
4.28867e-06	0.230253	0.437	0.311	0.121069	sLGR5_female	MATR3-1
4.29634e-06	0.203645	0.728	0.618	0.121286	sLGR5_female	PLP2
4.38194e-06	0.182081	0.289	0.15	0.123702	sLGR5_female	SLC48A1
4.41723e-06	0.161451	0.911	0.839	0.124698	sLGR5_female	SELENOH
4.61368e-06	0.214861	0.432	0.289	0.130244	sLGR5_female	PBX1
4.94545e-06	0.188597	0.277	0.15	0.13961	sLGR5_female	KIF1A
4.94631e-06	0.23622	0.56	0.425	0.139634	sLGR5_female	BEX2
5.17705e-06	0.182839	0.32	0.182	0.146148	sLGR5_female	PPIF
5.23071e-06	0.219174	0.489	0.343	0.147663	sLGR5_female	WASL
5.24188e-06	0.237821	0.549	0.411	0.147978	sLGR5_female	EMX2
5.68399e-06	0.182399	0.308	0.171	0.160459	sLGR5_female	RIF1
5.68817e-06	0.190447	0.389	0.254	0.160577	sLGR5_female	HINT2
5.70865e-06	0.321483	0.551	0.446	0.161155	sLGR5_female	MCL1
5.72468e-06	0.102241	0.997	0.986	0.161608	sLGR5_female	RPL34
5.93836e-06	0.191378	0.527	0.386	0.16764	sLGR5_female	MRPL20
6.15033e-06	0.154865	0.927	0.854	0.173624	sLGR5_female	TSPAN3
6.34212e-06	0.240052	0.583	0.482	0.179038	sLGR5_female	SMDT1
6.46819e-06	0.190492	0.411	0.257	0.182597	sLGR5_female	LAMTOR3
6.57295e-06	0.19599	0.366	0.221	0.185554	sLGR5_female	HOOK2
7.24722e-06	0.175499	0.902	0.829	0.204589	sLGR5_female	UQCRQ
7.34323e-06	0.213012	0.705	0.589	0.207299	sLGR5_female	ARGLU1
7.51726e-06	0.196659	0.288	0.175	0.212212	sLGR5_female	CD59
7.59258e-06	0.149283	0.229	0.104	0.214339	sLGR5_female	ICE2
7.76043e-06	0.183417	0.327	0.196	0.219077	sLGR5_female	COX17
7.7946e-06	0.15364	0.42	0.268	0.220042	sLGR5_female	PON2
7.82503e-06	0.196067	0.801	0.693	0.220901	sLGR5_female	ATP5F1D
8.1521e-06	0.1673	0.294	0.164	0.230134	sLGR5_female	LYPLAL1
8.21177e-06	0.155432	0.206	0.1	0.231818	sLGR5_female	DCTN6
8.37612e-06	0.301928	0.705	0.604	0.236458	sLGR5_female	MT-ND6
8.51618e-06	0.170303	0.266	0.146	0.240412	sLGR5_female	BTAF1
8.77192e-06	0.172483	0.303	0.175	0.247631	sLGR5_female	OXR1
9.27756e-06	0.191347	0.286	0.168	0.261905	sLGR5_female	ZFYVE21
9.31425e-06	0.158081	0.289	0.15	0.262941	sLGR5_female	PTAR1
9.41127e-06	0.190531	0.239	0.129	0.26568	sLGR5_female	BLOC1S1
9.47516e-06	0.209577	0.765	0.679	0.267484	sLGR5_female	SRRM1
9.7785e-06	0.180553	0.317	0.186	0.276047	sLGR5_female	TBC1D5
1.09867e-05	0.195972	0.554	0.429	0.310154	sLGR5_female	UROD
1.13936e-05	0.201772	0.228	0.125	0.321643	sLGR5_female	PPP1R1B
1.14666e-05	0.166381	0.304	0.175	0.323703	sLGR5_female	CLDND1
1.16379e-05	0.181468	0.279	0.161	0.328538	sLGR5_female	TP53INP2
1.17841e-05	0.244631	0.325	0.207	0.332665	sLGR5_female	MYL9
1.23283e-05	0.232954	0.806	0.746	0.348028	sLGR5_female	ATP5ME
1.25164e-05	0.18408	0.498	0.361	0.353337	sLGR5_female	DNAJC19
1.2685e-05	0.178356	0.757	0.657	0.358098	sLGR5_female	GADD45GIP1
1.35603e-05	0.146648	0.936	0.886	0.382807	sLGR5_female	SERINC5
1.37037e-05	0.142727	0.973	0.943	0.386855	sLGR5_female	PFDN5
1.42878e-05	0.18849	0.565	0.425	0.403345	sLGR5_female	PCNP
1.52823e-05	0.174572	0.619	0.464	0.431418	sLGR5_female	ANAPC13
1.57974e-05	0.161133	0.229	0.118	0.445961	sLGR5_female	VASN
1.58046e-05	0.184735	0.732	0.621	0.446162	sLGR5_female	LSM5
1.64503e-05	0.211987	0.221	0.107	0.464391	sLGR5_female	CDKN1A
1.68887e-05	0.225771	0.525	0.386	0.476768	sLGR5_female	KCNQ1OT1
1.69435e-05	0.168202	0.436	0.286	0.478315	sLGR5_female	ERLEC1
1.7385e-05	0.182809	0.839	0.764	0.490779	sLGR5_female	TMEM14C
1.76688e-05	0.220563	0.42	0.3	0.498791	sLGR5_female	MEF2A
1.80478e-05	0.146235	0.219	0.118	0.50949	sLGR5_female	C11orf54
1.90203e-05	0.200173	0.668	0.557	0.536944	sLGR5_female	NAXE
2.03704e-05	0.180555	0.596	0.461	0.575057	sLGR5_female	DPY30
2.04264e-05	0.194335	0.652	0.55	0.576637	sLGR5_female	DUT
2.04893e-05	0.175616	0.434	0.307	0.578413	sLGR5_female	ASNA1
2.04902e-05	0.146764	0.208	0.089	0.578439	sLGR5_female	P2RX7
2.10014e-05	0.20401	0.61	0.482	0.59287	sLGR5_female	BLVRA
2.163e-05	0.211414	0.259	0.161	0.610615	sLGR5_female	GPHN
2.27037e-05	0.19995	0.451	0.329	0.640925	sLGR5_female	TJP1
2.29349e-05	0.228081	0.349	0.239	0.647451	sLGR5_female	DIRAS3
2.34895e-05	0.170034	0.282	0.161	0.663108	sLGR5_female	FYN
2.38272e-05	0.170879	0.431	0.307	0.672643	sLGR5_female	SFT2D1
2.41757e-05	0.141858	0.26	0.139	0.682481	sLGR5_female	CCDC66
2.45229e-05	0.225023	0.421	0.314	0.69228	sLGR5_female	KDSR
2.47985e-05	0.280371	0.963	0.929	0.700062	sLGR5_female	VIM
2.56884e-05	0.188549	0.415	0.289	0.725182	sLGR5_female	ST6GALNAC4
2.58206e-05	0.166025	0.676	0.521	0.728917	sLGR5_female	SERPINF1
2.64142e-05	0.182625	0.761	0.654	0.745673	sLGR5_female	NDUFC1
2.64876e-05	0.209879	0.671	0.582	0.747745	sLGR5_female	LAMTOR4
2.74103e-05	0.140437	0.848	0.743	0.773794	sLGR5_female	SOD1
2.80581e-05	0.189038	0.382	0.271	0.79208	sLGR5_female	RNASEH2C
2.80942e-05	0.170427	0.679	0.557	0.7931	sLGR5_female	EPC1
2.89812e-05	0.167085	0.502	0.368	0.81814	sLGR5_female	DDX18
2.92861e-05	0.201521	0.558	0.457	0.826747	sLGR5_female	LSM4
3.15647e-05	0.164527	0.485	0.332	0.891072	sLGR5_female	TRAM1
3.16354e-05	0.196536	0.613	0.489	0.893067	sLGR5_female	CUEDC2
3.18546e-05	0.192858	0.412	0.279	0.899254	sLGR5_female	PPP1R10
3.22658e-05	0.180398	0.416	0.282	0.910862	sLGR5_female	TDGF1
3.28847e-05	0.17514	0.366	0.246	0.928335	sLGR5_female	AMD1
3.34317e-05	0.160919	0.906	0.836	0.943776	sLGR5_female	COMMD6
3.41962e-05	0.210662	0.593	0.482	0.965358	sLGR5_female	NDUFB1
3.46531e-05	0.176721	0.56	0.436	0.978257	sLGR5_female	MRPL4
3.70132e-05	0.141713	0.251	0.132	1	sLGR5_female	OXLD1
3.74091e-05	0.210784	0.472	0.368	1	sLGR5_female	MUC20-OT1
3.8902e-05	0.171709	0.254	0.154	1	sLGR5_female	PCMTD2
3.96466e-05	0.322668	0.641	0.564	1	sLGR5_female	BX470209.1
3.97905e-05	0.154073	0.937	0.864	1	sLGR5_female	RBP1
4.00945e-05	0.188372	0.286	0.179	1	sLGR5_female	FBXO34
4.01841e-05	0.188852	0.391	0.275	1	sLGR5_female	WDR54
4.30255e-05	0.179481	0.549	0.432	1	sLGR5_female	GSTM2
4.37804e-05	0.147709	0.228	0.125	1	sLGR5_female	MRPL38
4.86503e-05	0.170911	0.759	0.65	1	sLGR5_female	ARL6IP4
5.03326e-05	0.152476	0.202	0.118	1	sLGR5_female	CBWD1
5.10451e-05	0.211772	0.409	0.289	1	sLGR5_female	EZR
5.23022e-05	0.139502	0.869	0.764	1	sLGR5_female	SF3B6
5.25615e-05	0.163049	0.618	0.496	1	sLGR5_female	CD164
5.31142e-05	0.211591	0.296	0.182	1	sLGR5_female	MFAP4
5.51897e-05	0.162751	0.91	0.85	1	sLGR5_female	TRMT112
5.63172e-05	0.1302	0.953	0.907	1	sLGR5_female	COX4I1
5.66445e-05	0.1846	0.758	0.693	1	sLGR5_female	AKR1A1
5.8014e-05	0.135301	0.921	0.857	1	sLGR5_female	COX6C
5.87384e-05	0.232618	0.604	0.511	1	sLGR5_female	CWC27
5.91173e-05	0.162726	0.335	0.2	1	sLGR5_female	IGSF8
6.07819e-05	0.161367	0.311	0.196	1	sLGR5_female	VPS4B
6.1194e-05	0.144172	0.236	0.107	1	sLGR5_female	LAYN
6.17482e-05	0.165373	0.47	0.339	1	sLGR5_female	VPS25
6.2896e-05	0.178477	0.417	0.279	1	sLGR5_female	RNF8
6.50125e-05	0.158709	0.275	0.157	1	sLGR5_female	NDUFC2
6.56406e-05	0.196232	0.299	0.2	1	sLGR5_female	DUSP15
6.58419e-05	0.134607	0.207	0.1	1	sLGR5_female	ZNF608
6.79398e-05	0.180283	0.41	0.279	1	sLGR5_female	SESN3
6.79851e-05	0.168353	0.315	0.207	1	sLGR5_female	TMEM254
6.8271e-05	0.155529	0.325	0.211	1	sLGR5_female	CIB1
7.11108e-05	0.167213	0.647	0.525	1	sLGR5_female	MRPS26
7.46509e-05	0.196459	0.304	0.186	1	sLGR5_female	DACT1
7.55166e-05	0.181684	0.314	0.211	1	sLGR5_female	DEXI
7.72478e-05	0.147284	0.27	0.161	1	sLGR5_female	DALRD3
7.77252e-05	0.169722	0.252	0.139	1	sLGR5_female	SOX6
8.06993e-05	0.158206	0.305	0.179	1	sLGR5_female	SELENBP1
8.08647e-05	0.19389	0.566	0.457	1	sLGR5_female	CSRP1
8.11543e-05	0.123441	0.923	0.854	1	sLGR5_female	SNRPD2
8.11607e-05	0.170848	0.665	0.554	1	sLGR5_female	RWDD1
8.11817e-05	0.144534	0.211	0.111	1	sLGR5_female	MMP16
8.19182e-05	0.128141	0.201	0.093	1	sLGR5_female	CRACR2B
8.23554e-05	0.159692	0.205	0.107	1	sLGR5_female	VPS13C
8.24884e-05	0.185122	0.748	0.657	1	sLGR5_female	ANAPC16
8.38214e-05	0.179409	0.552	0.425	1	sLGR5_female	CLCN5
8.46158e-05	0.169491	0.48	0.361	1	sLGR5_female	SLF2
8.51124e-05	0.166883	0.577	0.45	1	sLGR5_female	SCAF11
8.51895e-05	0.149925	0.708	0.593	1	sLGR5_female	EIF5A
8.72918e-05	0.149389	0.374	0.25	1	sLGR5_female	CNOT4
9.04487e-05	0.184197	0.33	0.218	1	sLGR5_female	STX12
9.12749e-05	0.187285	0.493	0.375	1	sLGR5_female	ENC1
9.15422e-05	0.189852	0.433	0.329	1	sLGR5_female	LEPROTL1
9.17886e-05	0.16063	0.328	0.211	1	sLGR5_female	OFD1
9.18967e-05	0.15602	0.987	0.946	1	sLGR5_female	RNASE1
9.30335e-05	0.170951	0.322	0.211	1	sLGR5_female	CCDC50
9.46615e-05	0.167749	0.846	0.768	1	sLGR5_female	ATP5MD
9.73581e-05	0.162108	0.388	0.25	1	sLGR5_female	ANKRD12
0.000104891	0.170632	0.47	0.35	1	sLGR5_female	IFT22
0.000105284	0.201172	0.633	0.539	1	sLGR5_female	FXYD6
0.000105301	0.162288	0.414	0.293	1	sLGR5_female	FAM229B
0.000110367	0.147022	0.295	0.189	1	sLGR5_female	CEBPZOS
0.00011344	0.134591	0.224	0.125	1	sLGR5_female	TMEM136
0.000117321	0.179151	0.299	0.196	1	sLGR5_female	SMIM1
0.000120652	0.27194	0.224	0.146	1	sLGR5_female	WFDC2
0.000121205	0.142565	0.236	0.136	1	sLGR5_female	PAM16
0.000123496	0.139226	0.341	0.221	1	sLGR5_female	EXOSC7
0.000125079	0.13438	0.237	0.132	1	sLGR5_female	OSBPL1A
0.000126404	0.187756	0.512	0.4	1	sLGR5_female	PHF3
0.000126606	0.184864	0.709	0.618	1	sLGR5_female	APLP2
0.000129404	0.157187	0.261	0.161	1	sLGR5_female	GAMT
0.000130869	0.179199	0.638	0.532	1	sLGR5_female	ATXN7L3B
0.000133606	0.234424	0.423	0.318	1	sLGR5_female	HERPUD1
0.000134858	0.165991	0.554	0.432	1	sLGR5_female	DCTN3
0.000135567	0.161939	0.314	0.196	1	sLGR5_female	FHL2
0.000136617	0.153561	0.212	0.111	1	sLGR5_female	CDC42EP3
0.000139268	0.195327	0.578	0.479	1	sLGR5_female	HSDL2
0.000141373	0.144656	0.279	0.164	1	sLGR5_female	SPTSSA
0.000141606	0.171611	0.399	0.279	1	sLGR5_female	SRSF6
0.000142886	0.273307	0.585	0.493	1	sLGR5_female	ATP1B1
0.000143195	0.168282	0.318	0.211	1	sLGR5_female	TMEM160
0.000146132	0.175303	0.483	0.361	1	sLGR5_female	AKIRIN1
0.000148885	0.127454	0.203	0.104	1	sLGR5_female	SH3D19
0.000153121	0.126612	0.907	0.807	1	sLGR5_female	CUTA
0.000154445	0.136819	0.226	0.125	1	sLGR5_female	UBE2V1
0.000156415	0.239213	0.263	0.189	1	sLGR5_female	TOX3
0.000157575	0.212146	0.492	0.396	1	sLGR5_female	CYCS
0.000161525	0.158955	0.506	0.368	1	sLGR5_female	MED21
0.000164933	0.133325	0.223	0.107	1	sLGR5_female	RHOD
0.000169341	0.175342	0.498	0.386	1	sLGR5_female	REX1BD
0.000170817	0.215301	0.403	0.318	1	sLGR5_female	MRPS24
0.000171083	0.144412	0.324	0.2	1	sLGR5_female	FANCL
0.000171145	0.144959	0.264	0.157	1	sLGR5_female	PLSCR3
0.000171837	0.144582	0.286	0.179	1	sLGR5_female	APIP
0.00017519	0.167624	0.409	0.304	1	sLGR5_female	C18orf32
0.000176057	0.148357	0.203	0.118	1	sLGR5_female	MUM1L1
0.000178427	0.151978	0.277	0.175	1	sLGR5_female	HOXD8
0.000181355	0.173561	0.681	0.589	1	sLGR5_female	COPS9
0.000185631	0.131225	0.575	0.436	1	sLGR5_female	RALGPS2
0.000186828	0.143224	0.336	0.225	1	sLGR5_female	TSKU
0.000187841	0.145031	0.252	0.143	1	sLGR5_female	CEPT1
0.000190637	0.166996	0.446	0.332	1	sLGR5_female	SRP19
0.000191331	0.143794	0.921	0.864	1	sLGR5_female	UBL5
0.00019229	0.144031	0.264	0.154	1	sLGR5_female	ZNRF3
0.000193985	0.183168	0.459	0.339	1	sLGR5_female	DDX3X
0.000196314	0.130111	0.21	0.114	1	sLGR5_female	WDR11
0.000196582	0.184733	0.312	0.207	1	sLGR5_female	PLA2G16
0.000199428	0.132351	0.25	0.15	1	sLGR5_female	TVP23B
0.000199748	0.166534	0.244	0.154	1	sLGR5_female	CAST
0.000201037	0.174174	0.453	0.35	1	sLGR5_female	FAM204A
0.000201092	0.167462	0.274	0.179	1	sLGR5_female	MAPK14
0.000201318	0.154688	0.364	0.25	1	sLGR5_female	SDAD1
0.000202655	0.151001	0.344	0.232	1	sLGR5_female	MORN2
0.000203396	0.147639	0.775	0.704	1	sLGR5_female	CBX3
0.000204444	0.158501	0.288	0.186	1	sLGR5_female	UACA
0.00020634	0.164248	0.728	0.646	1	sLGR5_female	EMC4
0.000207739	0.155383	0.6	0.493	1	sLGR5_female	RPL26L1
0.000209024	0.148925	0.344	0.225	1	sLGR5_female	NUBP2
0.000212936	0.160511	0.687	0.596	1	sLGR5_female	LAMTOR1
0.000218396	0.134659	0.26	0.157	1	sLGR5_female	PNPLA8
0.000219228	0.159097	0.652	0.554	1	sLGR5_female	DMAC1
0.000220058	0.171448	0.613	0.518	1	sLGR5_female	IFT57
0.000221671	0.174547	0.5	0.386	1	sLGR5_female	FNDC3A
0.000223044	0.179284	0.542	0.439	1	sLGR5_female	GSTM3
0.0002279	0.385892	0.25	0.164	1	sLGR5_female	PCP4
0.000230667	0.164965	0.612	0.514	1	sLGR5_female	THYN1
0.000246896	0.122889	0.251	0.132	1	sLGR5_female	NQO2
0.00024846	0.164271	0.413	0.304	1	sLGR5_female	AC084033.3
0.000253196	0.328367	0.399	0.325	1	sLGR5_female	KLF6
0.000253554	0.155866	0.347	0.243	1	sLGR5_female	NDUFAF8
0.000254552	0.171895	0.429	0.311	1	sLGR5_female	KAT6B
0.0002606	0.140071	0.667	0.55	1	sLGR5_female	THRAP3
0.000271684	0.132752	0.329	0.214	1	sLGR5_female	FAM173A
0.000275723	0.14294	0.959	0.929	1	sLGR5_female	ELOB
0.000278732	0.172439	0.719	0.643	1	sLGR5_female	CDC42
0.000279452	0.132943	0.299	0.189	1	sLGR5_female	MCTP2
0.000279639	0.131515	0.217	0.125	1	sLGR5_female	ITGB3BP
0.000287145	0.159158	0.421	0.321	1	sLGR5_female	MRPL13
0.000292757	0.149066	0.564	0.443	1	sLGR5_female	FDXR
0.000295862	0.134014	0.222	0.121	1	sLGR5_female	TMEM170A
0.000295886	0.132385	0.52	0.382	1	sLGR5_female	G3BP2
0.000299537	0.162688	0.743	0.668	1	sLGR5_female	NHP2
0.000304038	0.133997	0.326	0.207	1	sLGR5_female	PMM1
0.000304222	0.174915	0.232	0.146	1	sLGR5_female	TMEM163
0.000306333	0.204128	0.636	0.546	1	sLGR5_female	LPIN2
0.000312565	0.129282	0.239	0.136	1	sLGR5_female	ETFRF1
0.000315218	0.136844	0.259	0.161	1	sLGR5_female	ZNF771
0.000320187	0.162039	0.849	0.811	1	sLGR5_female	SELENOW
0.00032275	0.189967	0.202	0.132	1	sLGR5_female	TSPAN5
0.000329308	0.152437	0.509	0.393	1	sLGR5_female	ATP6AP2
0.000344192	0.232097	0.311	0.221	1	sLGR5_female	EPHA4
0.000344886	0.146586	0.907	0.861	1	sLGR5_female	SARAF
0.000346274	0.151985	0.464	0.35	1	sLGR5_female	UBE2D1
0.00035164	0.175209	0.467	0.371	1	sLGR5_female	ORMDL1
0.000353946	0.169869	0.342	0.243	1	sLGR5_female	SLC35F5
0.00035449	0.408428	0.61	0.582	1	sLGR5_female	DUSP1
0.000359136	0.170006	0.499	0.404	1	sLGR5_female	ENSA
0.0003644	0.121713	0.225	0.129	1	sLGR5_female	ATF6
0.000371301	0.132921	0.24	0.146	1	sLGR5_female	BLCAP
0.000377652	0.136389	0.292	0.179	1	sLGR5_female	LINC01197
0.000379597	0.160615	0.643	0.554	1	sLGR5_female	MRPL43
0.000380841	0.211597	0.289	0.2	1	sLGR5_female	NEFH
0.000397501	0.170568	0.28	0.175	1	sLGR5_female	SNHG9
0.000403364	0.13249	0.822	0.732	1	sLGR5_female	CSTB
0.000403861	0.27912	0.254	0.182	1	sLGR5_female	KLF2
0.000407934	0.160604	0.71	0.632	1	sLGR5_female	NDUFB7
0.000410441	0.137086	0.206	0.121	1	sLGR5_female	AC078883.1
0.000431345	0.112774	0.622	0.489	1	sLGR5_female	PHACTR2
0.000437667	0.170538	0.303	0.214	1	sLGR5_female	SMIM37
0.00044093	0.161604	0.521	0.421	1	sLGR5_female	PUM1
0.000446641	0.130581	0.333	0.218	1	sLGR5_female	ZNF148
0.000450806	0.150609	0.56	0.443	1	sLGR5_female	NDUFA5
0.000459378	0.136583	0.279	0.179	1	sLGR5_female	SURF1
0.00046982	0.214805	0.412	0.321	1	sLGR5_female	BTBD3
0.000477929	0.140686	0.205	0.118	1	sLGR5_female	LUZP2
0.000479146	0.173178	0.425	0.332	1	sLGR5_female	ANXA4
0.000480143	0.174206	0.391	0.296	1	sLGR5_female	NAA38
0.000489022	0.142093	0.375	0.246	1	sLGR5_female	2021-03-07
0.000491509	0.145971	0.23	0.146	1	sLGR5_female	MRC2
0.000496345	0.160066	0.411	0.3	1	sLGR5_female	NBPF14
0.000496839	0.171777	0.286	0.193	1	sLGR5_female	ETV1
0.000518002	0.168514	0.336	0.232	1	sLGR5_female	MAP3K1
0.000522182	0.135119	0.694	0.604	1	sLGR5_female	MRPL52
0.000526609	0.140473	0.519	0.4	1	sLGR5_female	GOPC
0.000528258	0.134131	0.317	0.204	1	sLGR5_female	POLR2D
0.000535239	0.135575	0.33	0.225	1	sLGR5_female	MRPL24
0.000540907	0.18441	0.417	0.318	1	sLGR5_female	TRAPPC5
0.000542949	0.119008	0.958	0.921	1	sLGR5_female	YWHAQ
0.000544686	0.148066	0.433	0.321	1	sLGR5_female	DGCR6L
0.000549869	0.161268	0.78	0.714	1	sLGR5_female	PRKAR1A
0.000553873	0.1311	0.287	0.175	1	sLGR5_female	MB21D2
0.000570417	0.170938	0.662	0.579	1	sLGR5_female	CNOT7
0.000577673	0.14394	0.574	0.457	1	sLGR5_female	TXN2
0.000584062	0.118492	0.811	0.718	1	sLGR5_female	SCAND1
0.000588268	0.17591	0.623	0.536	1	sLGR5_female	CDH3
0.000591461	0.14736	0.261	0.179	1	sLGR5_female	WFS1
0.000593175	0.153214	0.407	0.307	1	sLGR5_female	SBDS
0.000625193	0.126881	0.242	0.154	1	sLGR5_female	INTS14
0.000645854	0.132534	0.301	0.193	1	sLGR5_female	MCF2L2
0.000647282	0.133833	0.827	0.732	1	sLGR5_female	TIMP1
0.000651127	0.140283	0.449	0.329	1	sLGR5_female	CDK2AP2
0.000661068	0.101384	0.963	0.932	1	sLGR5_female	HINT1
0.000677584	0.13147	0.214	0.132	1	sLGR5_female	KIAA0232
0.000691438	0.142073	0.469	0.354	1	sLGR5_female	KMT2C
0.000694755	0.195849	0.599	0.532	1	sLGR5_female	SERPINB6
0.00071502	0.134399	0.264	0.171	1	sLGR5_female	TSPAN31
0.000725048	0.146506	0.252	0.164	1	sLGR5_female	ZNF711
0.000726828	0.137481	0.24	0.157	1	sLGR5_female	DSE
0.000729741	0.12824	0.289	0.196	1	sLGR5_female	MBIP
0.000731182	0.123857	0.814	0.721	1	sLGR5_female	ATP2B1
0.000731636	0.184429	0.581	0.496	1	sLGR5_female	NPEPPS
0.000738571	0.390884	0.248	0.175	1	sLGR5_female	DUSP2
0.00074047	0.154677	0.365	0.261	1	sLGR5_female	REPS2
0.000745339	0.618876	0.834	0.871	1	sLGR5_female	JUN
0.000776105	0.126009	0.916	0.871	1	sLGR5_female	ATP5PF
0.000776399	0.148113	0.754	0.675	1	sLGR5_female	IGFBP4
0.000787081	0.124368	0.791	0.7	1	sLGR5_female	GABARAPL2
0.000826743	0.151276	0.541	0.436	1	sLGR5_female	VPS29
0.00083931	0.129838	0.259	0.164	1	sLGR5_female	CETN3
0.000845389	0.133813	0.425	0.311	1	sLGR5_female	ACADM
0.000846415	0.148025	0.353	0.243	1	sLGR5_female	GPCPD1
0.000857117	0.165889	0.327	0.25	1	sLGR5_female	ATPAF1
0.000863935	0.118679	0.37	0.254	1	sLGR5_female	NAGK
0.00086543	0.193877	0.965	0.925	1	sLGR5_female	RPS29
0.000872799	0.17772	0.471	0.382	1	sLGR5_female	POLR2J
0.000883477	0.113876	0.31	0.196	1	sLGR5_female	ANTXR2
0.00089838	0.14359	0.252	0.171	1	sLGR5_female	MAMSTR
0.000905075	0.119541	0.422	0.304	1	sLGR5_female	TTC14
0.000908287	0.115398	0.278	0.175	1	sLGR5_female	C15orf40
0.000922998	0.123854	0.3	0.2	1	sLGR5_female	IFT27
0.000925572	0.123319	0.205	0.125	1	sLGR5_female	LZTFL1
0.00094777	0.111983	0.908	0.854	1	sLGR5_female	C11orf58
0.00095464	0.160172	0.728	0.661	1	sLGR5_female	CDK4
0.000965438	0.126902	0.949	0.911	1	sLGR5_female	RPL38
0.000999966	0.126101	0.236	0.15	1	sLGR5_female	ECI1
0.00100435	0.146558	0.635	0.543	1	sLGR5_female	PSME2
0.00100592	0.145652	0.285	0.182	1	sLGR5_female	CYBA
0.00101224	0.457417	0.647	0.646	1	sLGR5_female	JUNB
0.00101588	0.143423	0.568	0.468	1	sLGR5_female	MYDGF
0.00105792	0.12305	0.305	0.207	1	sLGR5_female	PSMA3-AS1
0.00106463	0.153395	0.345	0.246	1	sLGR5_female	ZNF770
0.00108089	0.105401	0.213	0.121	1	sLGR5_female	ESCO1
0.00109256	0.109515	0.249	0.146	1	sLGR5_female	SMIM8
0.00109642	0.132567	0.229	0.157	1	sLGR5_female	MPDZ
0.00110164	0.103814	0.261	0.15	1	sLGR5_female	LINC01089
0.00111774	0.125123	0.348	0.25	1	sLGR5_female	SCPEP1
0.0011289	0.150734	0.298	0.218	1	sLGR5_female	UBE2Q2
0.00115505	0.127753	0.301	0.2	1	sLGR5_female	RPP21
0.00116044	0.153164	0.839	0.786	1	sLGR5_female	NDUFS8
0.00116708	0.15513	0.454	0.371	1	sLGR5_female	CHID1
0.00116879	0.161958	0.701	0.646	1	sLGR5_female	ERP29
0.00117008	0.15582	0.585	0.496	1	sLGR5_female	FCGRT
0.00118265	0.101696	0.985	0.957	1	sLGR5_female	SOX4
0.00118453	0.162258	0.438	0.343	1	sLGR5_female	CD81
0.00118678	0.113208	0.958	0.929	1	sLGR5_female	CHCHD2
0.00120205	0.111076	0.311	0.2	1	sLGR5_female	PTPRG
0.00121773	0.116525	0.218	0.136	1	sLGR5_female	AL050341.2
0.00122413	0.109279	0.824	0.721	1	sLGR5_female	PRDX3
0.00123259	0.118487	0.274	0.168	1	sLGR5_female	ZFYVE16
0.00123813	0.118651	0.275	0.175	1	sLGR5_female	KRIT1
0.0012603	0.15275	0.472	0.386	1	sLGR5_female	TMEM205
0.00126695	0.119601	0.28	0.189	1	sLGR5_female	CEP95
0.00127256	0.137972	0.254	0.168	1	sLGR5_female	ZNF606
0.00128525	0.126862	0.329	0.236	1	sLGR5_female	CBWD2
0.00129217	0.217244	0.564	0.482	1	sLGR5_female	S100A10
0.00129999	0.12429	0.271	0.179	1	sLGR5_female	THRA
0.00132419	0.148073	0.451	0.35	1	sLGR5_female	REV3L
0.00133331	0.126944	0.374	0.271	1	sLGR5_female	KRR1
0.00134507	0.128242	0.29	0.196	1	sLGR5_female	POLR3GL
0.00135486	0.121084	0.497	0.371	1	sLGR5_female	SSNA1
0.0013604	0.114869	0.25	0.157	1	sLGR5_female	ZNF75A
0.00137388	0.151238	0.246	0.171	1	sLGR5_female	HIST1H2BK
0.00140643	0.12954	0.557	0.45	1	sLGR5_female	TUT4
0.00140857	0.1455	0.483	0.371	1	sLGR5_female	MRPL11
0.00141201	0.138608	0.755	0.693	1	sLGR5_female	TIMM13
0.00142742	0.108618	0.225	0.136	1	sLGR5_female	TWSG1
0.0014453	0.150925	0.485	0.389	1	sLGR5_female	TMEM219
0.00144885	0.108628	0.244	0.146	1	sLGR5_female	LTV1
0.00146076	0.119482	0.371	0.25	1	sLGR5_female	CD9
0.00146911	0.167887	0.504	0.432	1	sLGR5_female	ING4
0.00149995	0.150207	0.522	0.443	1	sLGR5_female	CYC1
0.00152537	0.128655	0.448	0.339	1	sLGR5_female	RNF149
0.00153322	0.129903	0.396	0.3	1	sLGR5_female	CHD1
0.00156165	0.125794	0.748	0.675	1	sLGR5_female	COMT
0.00157974	0.170825	0.481	0.396	1	sLGR5_female	PRDX4
0.0015806	0.162427	0.76	0.714	1	sLGR5_female	TMED9
0.00158366	0.118536	0.315	0.214	1	sLGR5_female	ABI1
0.0016216	0.160528	0.262	0.193	1	sLGR5_female	MGARP
0.00164984	0.121629	0.302	0.204	1	sLGR5_female	TM7SF3
0.00169455	0.113502	0.225	0.143	1	sLGR5_female	NT5DC1
0.00170302	0.152167	0.328	0.239	1	sLGR5_female	EIF2AK2
0.00170545	0.164152	0.405	0.321	1	sLGR5_female	CKAP5
0.00171476	0.362126	0.433	0.382	1	sLGR5_female	GADD45B
0.00174888	0.138537	0.356	0.264	1	sLGR5_female	OSBPL8
0.00177179	0.133395	0.304	0.207	1	sLGR5_female	TES
0.00178346	0.113791	0.295	0.193	1	sLGR5_female	RBM4B
0.00178702	0.124347	0.284	0.189	1	sLGR5_female	RAB11FIP2
0.00182973	0.177741	0.594	0.511	1	sLGR5_female	EIF4EBP1
0.00185814	0.106326	0.392	0.261	1	sLGR5_female	AL450998.2
0.00189499	0.138071	0.314	0.229	1	sLGR5_female	TIMM10
0.00190872	0.120713	0.725	0.654	1	sLGR5_female	RBM25
0.00191198	0.13659	0.972	0.954	1	sLGR5_female	SKP1
0.00191564	0.141232	0.344	0.25	1	sLGR5_female	C1orf123
0.00193013	0.127397	0.267	0.189	1	sLGR5_female	GPATCH2
0.00194818	0.148828	0.334	0.257	1	sLGR5_female	TTC19
0.00198884	0.126615	0.402	0.296	1	sLGR5_female	ZSWIM7
0.00199171	0.156008	0.393	0.307	1	sLGR5_female	CCDC34
0.00199979	0.202167	0.675	0.625	1	sLGR5_female	TUBB4B
0.00200351	0.159263	0.466	0.382	1	sLGR5_female	PCM1
0.00201571	0.118265	0.33	0.221	1	sLGR5_female	BIK
0.00203425	0.131192	0.719	0.625	1	sLGR5_female	MRPS6
0.00207487	0.12442	0.214	0.136	1	sLGR5_female	NUP160
0.00207763	0.139457	0.401	0.3	1	sLGR5_female	C1QTNF4
0.0020981	0.152275	0.245	0.168	1	sLGR5_female	HSD17B1
0.00211829	0.159675	0.629	0.557	1	sLGR5_female	NOL7
0.00212005	0.123681	0.216	0.129	1	sLGR5_female	AC025164.1
0.0021383	0.193631	0.524	0.464	1	sLGR5_female	RBM4
0.00215502	0.128165	0.632	0.536	1	sLGR5_female	LSM2
0.00217191	0.137228	0.75	0.661	1	sLGR5_female	LUC7L3
0.00217243	0.124152	0.276	0.186	1	sLGR5_female	RBM26
0.00223005	0.117167	0.529	0.425	1	sLGR5_female	SLC25A39
0.00225211	0.121742	0.337	0.243	1	sLGR5_female	BDP1
0.00228069	0.12194	0.331	0.239	1	sLGR5_female	EMC8
0.00228505	0.154669	0.516	0.439	1	sLGR5_female	QTRT1
0.00229522	0.131679	0.314	0.229	1	sLGR5_female	RAB5C
0.00233192	0.138416	0.303	0.225	1	sLGR5_female	ASAH1
0.00233643	0.110775	0.251	0.171	1	sLGR5_female	MRPL39
0.00234192	0.113406	0.744	0.654	1	sLGR5_female	BZW1
0.00234718	0.100901	0.911	0.843	1	sLGR5_female	UQCR10
0.00235668	0.167639	0.599	0.529	1	sLGR5_female	ADI1
0.00239596	0.12774	0.449	0.339	1	sLGR5_female	UBE2L6
0.00242461	0.179121	0.443	0.382	1	sLGR5_female	SMARCD3
0.00250006	0.216694	0.409	0.332	1	sLGR5_female	SERTAD1
0.0025039	0.1005	0.204	0.118	1	sLGR5_female	ALG2
0.00250513	0.102043	0.255	0.161	1	sLGR5_female	MMAB
0.00251668	0.131733	0.355	0.261	1	sLGR5_female	AFG3L2
0.0025281	0.107518	0.421	0.307	1	sLGR5_female	CAPZA1
0.0025292	0.112591	0.845	0.768	1	sLGR5_female	BNIP3L
0.00254665	0.126497	0.767	0.714	1	sLGR5_female	AP2S1
0.0025474	0.132974	0.508	0.411	1	sLGR5_female	C19orf70
0.00255285	0.132798	0.233	0.161	1	sLGR5_female	TMEM106C
0.00262558	0.120091	0.446	0.336	1	sLGR5_female	MRPS18C
0.00273776	0.117748	0.225	0.15	1	sLGR5_female	RPGRIP1L
0.00277675	0.121986	0.246	0.179	1	sLGR5_female	TP53I13
0.00282237	0.130273	0.203	0.129	1	sLGR5_female	CD2AP
0.00282456	0.132297	0.433	0.346	1	sLGR5_female	SNRNP25
0.00283567	0.115392	0.352	0.254	1	sLGR5_female	MTHFS
0.00286652	0.111692	0.379	0.271	1	sLGR5_female	SECISBP2
0.00289105	0.104109	0.258	0.164	1	sLGR5_female	PCDH9
0.0028948	0.117772	0.305	0.218	1	sLGR5_female	MANBAL
0.00289904	0.115093	0.257	0.182	1	sLGR5_female	SMIM30
0.00289972	0.139136	0.45	0.368	1	sLGR5_female	HCFC1R1
0.00293603	0.13545	0.702	0.632	1	sLGR5_female	SSR3
0.00298305	0.142915	0.234	0.157	1	sLGR5_female	SLC5A3
0.00302213	0.148474	0.681	0.621	1	sLGR5_female	ATRAID
0.00303344	0.138516	0.564	0.479	1	sLGR5_female	RHEB
0.00304152	0.109764	0.256	0.168	1	sLGR5_female	FAM53C
0.00306098	0.127621	0.458	0.371	1	sLGR5_female	CENPX
0.00309451	0.108346	0.311	0.214	1	sLGR5_female	CCDC126
0.003111	0.113585	0.785	0.711	1	sLGR5_female	RPAIN
0.00311698	0.116387	0.689	0.589	1	sLGR5_female	ALKBH7
0.00313668	0.211783	0.524	0.457	1	sLGR5_female	AP1S2
0.00317233	0.103074	0.856	0.796	1	sLGR5_female	ATP5MF
0.00319063	0.107847	0.314	0.214	1	sLGR5_female	RPP25
0.00319215	0.125861	0.806	0.739	1	sLGR5_female	DYNLRB1
0.00322136	0.162444	0.491	0.414	1	sLGR5_female	CBLB
0.00325124	0.114806	0.213	0.139	1	sLGR5_female	ROGDI
0.00326641	0.113781	0.289	0.204	1	sLGR5_female	PPP1R7
0.00328953	0.101978	0.248	0.15	1	sLGR5_female	RNF4
0.00329514	0.145791	0.514	0.432	1	sLGR5_female	LPP
0.00329568	0.109225	0.263	0.168	1	sLGR5_female	TMEM126A
0.00329742	0.130492	0.713	0.639	1	sLGR5_female	NDUFA3
0.0033127	0.123999	0.282	0.189	1	sLGR5_female	ASTN2
0.00336964	0.138841	0.409	0.339	1	sLGR5_female	CLEC11A
0.0034233	0.12992	0.564	0.475	1	sLGR5_female	ARPC5
0.00342944	0.107436	0.578	0.464	1	sLGR5_female	ARL3
0.00343593	0.11977	0.232	0.139	1	sLGR5_female	PRKG1
0.00361411	0.104107	0.85	0.782	1	sLGR5_female	ARPC3
0.00363168	0.128519	0.457	0.357	1	sLGR5_female	ZNF706
0.00367804	0.148552	0.295	0.229	1	sLGR5_female	DAPK1
0.00368771	0.108365	0.216	0.143	1	sLGR5_female	TXNL4B
0.00369652	0.117248	0.965	0.936	1	sLGR5_female	ATP5F1E
0.00376844	0.117758	0.361	0.264	1	sLGR5_female	DYNC2LI1
0.00377724	0.127161	0.257	0.182	1	sLGR5_female	RNPC3
0.00383169	0.147785	0.468	0.386	1	sLGR5_female	PPP2CA
0.00389284	0.165146	0.202	0.15	1	sLGR5_female	ID4
0.0039018	0.115427	0.683	0.593	1	sLGR5_female	TMEM9
0.00390456	0.114474	0.213	0.146	1	sLGR5_female	STK33
0.00390486	0.101867	0.265	0.179	1	sLGR5_female	UNC50
0.00391911	0.111206	0.229	0.154	1	sLGR5_female	HMGCL
0.00393838	0.118217	0.317	0.243	1	sLGR5_female	BPHL
0.00396533	0.108436	0.547	0.45	1	sLGR5_female	MRPL41
0.00398239	0.144511	0.259	0.193	1	sLGR5_female	CADPS2
0.00398758	0.14643	0.403	0.332	1	sLGR5_female	FYTTD1
0.00411126	0.123884	0.46	0.379	1	sLGR5_female	CHCHD1
0.00411304	0.104355	0.498	0.4	1	sLGR5_female	RAP1B
0.00411403	0.123694	0.255	0.186	1	sLGR5_female	NEU1
0.00416379	0.13158	0.777	0.725	1	sLGR5_female	PRRC2C
0.004165	0.139	0.6	0.511	1	sLGR5_female	MAP4
0.00421146	0.118912	0.376	0.279	1	sLGR5_female	HIF3A
0.00422548	0.111741	0.303	0.211	1	sLGR5_female	GTF3A
0.00424651	0.119267	0.305	0.211	1	sLGR5_female	CDK20
0.00437861	0.128545	0.247	0.171	1	sLGR5_female	LAMB2
0.00444947	0.111734	0.323	0.232	1	sLGR5_female	SETX
0.00445024	0.12085	0.364	0.275	1	sLGR5_female	ZNF146
0.00462696	0.124516	0.459	0.368	1	sLGR5_female	COX14
0.00462771	0.146931	0.512	0.432	1	sLGR5_female	ACTN4
0.00467093	0.123568	0.575	0.479	1	sLGR5_female	CAPZA2
0.00468621	0.119389	0.381	0.286	1	sLGR5_female	SLC25A4
0.00472305	0.125353	0.292	0.218	1	sLGR5_female	PEMT
0.00478139	0.1037	0.71	0.639	1	sLGR5_female	TPR
[truncated: 183 more rows]

## Sheet: 3_CCANs_supportingLineage
Peak	CCAN	peaks_formatted	peak_width	exon	gene_id	gene	gene_name	annotation	promoter	tss_distance	ENCODE_blacklist	coelEpi	sKITLG	sLGR5	sPAX8e	sPAX8m	preGC-I	ovarian surface	preGC-IIa	preGC-IIb	granulosa	Sertoli	FetalLeydig-like
chr1-100048052-100049110	2	chr1-100048052-100049110	1059	0	ENSG00000156875	1	MFSD14A	intron	0	9560	0	-0.776564	-0.480423	0.835608	-0.3675	-0.274637	0.404049	-0.815548	-0.663993	-0.402916	-0.130214	2.95451	-0.282371
chr1-100126934-100127825	2	chr1-100126934-100127825	892	0	ENSG00000156876	1	SASS6	intron	0	5129	0	-0.776564	-0.480423	0.835608	-0.3675	-0.274637	0.404049	-0.815548	-0.663993	-0.402916	-0.130214	2.95451	-0.282371
chr1-99879422-99880056	2	chr1-99879422-99880056	635	1	ENSG00000283495	1	AC096949.1	exon	0	4951	0	-0.776564	-0.480423	0.835608	-0.3675	-0.274637	0.404049	-0.815548	-0.663993	-0.402916	-0.130214	2.95451	-0.282371
chr1-10012740-10013195	556	chr1-10012740-10013195	456	0	ENSG00000162444	1	RBP7	intron	0	15523	0	0.225046	-0.55104	0.0528734	-0.0326367	0.00221393	0.406644	-0.955354	-0.852665	-0.811499	-0.430582	2.99836	-0.0513625
chr1-10031483-10031801	556	chr1-10031483-10031801	319	0	ENSG00000130939	0	UBE4B	promoter	1	1030	0	0.225046	-0.55104	0.0528734	-0.0326367	0.00221393	0.406644	-0.955354	-0.852665	-0.811499	-0.430582	2.99836	-0.0513625
chr1-10043548-10044178	556	chr1-10043548-10044178	631	0	ENSG00000130939	1	UBE4B	intron	0	9951	0	0.225046	-0.55104	0.0528734	-0.0326367	0.00221393	0.406644	-0.955354	-0.852665	-0.811499	-0.430582	2.99836	-0.0513625
chr1-10045852-10046953	556	chr1-10045852-10046953	1102	0	ENSG00000130939	1	UBE4B	intron	0	12255	0	0.225046	-0.55104	0.0528734	-0.0326367	0.00221393	0.406644	-0.955354	-0.852665	-0.811499	-0.430582	2.99836	-0.0513625
chr1-10057366-10058184	556	chr1-10057366-10058184	819	0	ENSG00000130939	1	UBE4B	intron	0	23769	0	0.225046	-0.55104	0.0528734	-0.0326367	0.00221393	0.406644	-0.955354	-0.852665	-0.811499	-0.430582	2.99836	-0.0513625
chr1-10066428-10067379	556	chr1-10066428-10067379	952	0	ENSG00000130939	1	UBE4B	intron	0	32831	0	0.225046	-0.55104	0.0528734	-0.0326367	0.00221393	0.406644	-0.955354	-0.852665	-0.811499	-0.430582	2.99836	-0.0513625
chr1-10067564-10067799	556	chr1-10067564-10067799	236	0	ENSG00000130939	1	UBE4B	intron	0	33061	0	0.225046	-0.55104	0.0528734	-0.0326367	0.00221393	0.406644	-0.955354	-0.852665	-0.811499	-0.430582	2.99836	-0.0513625
chr1-10074873-10075618	556	chr1-10074873-10075618	746	0	ENSG00000130939	1	UBE4B	intron	0	25242	0	0.225046	-0.55104	0.0528734	-0.0326367	0.00221393	0.406644	-0.955354	-0.852665	-0.811499	-0.430582	2.99836	-0.0513625
chr1-10152763-10153363	556	chr1-10152763-10153363	601	0	ENSG00000130939	1	UBE4B	intron	0	4990	0	0.225046	-0.55104	0.0528734	-0.0326367	0.00221393	0.406644	-0.955354	-0.852665	-0.811499	-0.430582	2.99836	-0.0513625
chr1-10196519-10197581	556	chr1-10196519-10197581	1063	0		0		intergenic	0	13223	0	0.225046	-0.55104	0.0528734	-0.0326367	0.00221393	0.406644	-0.955354	-0.852665	-0.811499	-0.430582	2.99836	-0.0513625
chr1-10228463-10228915	556	chr1-10228463-10228915	453	0	ENSG00000054523	1	KIF1B	promoter	1	1848	0	0.225046	-0.55104	0.0528734	-0.0326367	0.00221393	0.406644	-0.955354	-0.852665	-0.811499	-0.430582	2.99836	-0.0513625
chr1-10295266-10296218	556	chr1-10295266-10296218	953	1	ENSG00000054523	1	KIF1B	exon	0	12815	0	0.225046	-0.55104	0.0528734	-0.0326367	0.00221393	0.406644	-0.955354	-0.852665	-0.811499	-0.430582	2.99836	-0.0513625
chr1-10301378-10302714	556	chr1-10301378-10302714	1337	0	ENSG00000054523	1	KIF1B	intron	0	18927	0	0.225046	-0.55104	0.0528734	-0.0326367	0.00221393	0.406644	-0.955354	-0.852665	-0.811499	-0.430582	2.99836	-0.0513625
chr1-10337899-10338373	556	chr1-10337899-10338373	475	0	ENSG00000054523	1	KIF1B	intron	0	6401	0	0.225046	-0.55104	0.0528734	-0.0326367	0.00221393	0.406644	-0.955354	-0.852665	-0.811499	-0.430582	2.99836	-0.0513625
chr1-10339453-10340137	556	chr1-10339453-10340137	685	1	ENSG00000054523	1	KIF1B	exon	0	4637	0	0.225046	-0.55104	0.0528734	-0.0326367	0.00221393	0.406644	-0.955354	-0.852665	-0.811499	-0.430582	2.99836	-0.0513625
chr1-10370762-10371401	556	chr1-10370762-10371401	640	1	ENSG00000054523	1	KIF1B	exon	0	5595	0	0.225046	-0.55104	0.0528734	-0.0326367	0.00221393	0.406644	-0.955354	-0.852665	-0.811499	-0.430582	2.99836	-0.0513625
chr1-10436404-10437387	556	chr1-10436404-10437387	984	0	ENSG00000175279	1	APITD1	intron	0	2735	0	0.225046	-0.55104	0.0528734	-0.0326367	0.00221393	0.406644	-0.955354	-0.852665	-0.811499	-0.430582	2.99836	-0.0513625
chr1-10457624-10458407	556	chr1-10457624-10458407	784	1	ENSG00000160049	1	DFFA	exon	0	7904	0	0.225046	-0.55104	0.0528734	-0.0326367	0.00221393	0.406644	-0.955354	-0.852665	-0.811499	-0.430582	2.99836	-0.0513625
chr1-10489924-10490722	556	chr1-10489924-10490722	799	0	ENSG00000142655	1	PEX14	intron	0	14941	0	0.225046	-0.55104	0.0528734	-0.0326367	0.00221393	0.406644	-0.955354	-0.852665	-0.811499	-0.430582	2.99836	-0.0513625
chr1-10555443-10556696	556	chr1-10555443-10556696	1254	0	ENSG00000142655	1	PEX14	intron	0	19554	0	0.225046	-0.55104	0.0528734	-0.0326367	0.00221393	0.406644	-0.955354	-0.852665	-0.811499	-0.430582	2.99836	-0.0513625
chr1-10692359-10692622	556	chr1-10692359-10692622	264	0	ENSG00000130940	1	CASZ1	intron	0	1289	0	0.225046	-0.55104	0.0528734	-0.0326367	0.00221393	0.406644	-0.955354	-0.852665	-0.811499	-0.430582	2.99836	-0.0513625
chr1-8017513-8018229	556	chr1-8017513-8018229	717	0	ENSG00000116285	1	ERRFI1	promoter	1	1879	0	0.225046	-0.55104	0.0528734	-0.0326367	0.00221393	0.406644	-0.955354	-0.852665	-0.811499	-0.430582	2.99836	-0.0513625
chr1-8363288-8363878	556	chr1-8363288-8363878	591	1	ENSG00000142599	1	RERE	exon	1	443	0	0.225046	-0.55104	0.0528734	-0.0326367	0.00221393	0.406644	-0.955354	-0.852665	-0.811499	-0.430582	2.99836	-0.0513625
chr1-8385192-8385737	556	chr1-8385192-8385737	546	0	ENSG00000142599	1	RERE	intron	0	20353	0	0.225046	-0.55104	0.0528734	-0.0326367	0.00221393	0.406644	-0.955354	-0.852665	-0.811499	-0.430582	2.99836	-0.0513625
chr1-8438479-8439780	556	chr1-8438479-8439780	1302	0	ENSG00000142599	1	RERE	intron	0	13266	0	0.225046	-0.55104	0.0528734	-0.0326367	0.00221393	0.406644	-0.955354	-0.852665	-0.811499	-0.430582	2.99836	-0.0513625
chr1-8443513-8443839	556	chr1-8443513-8443839	327	0	ENSG00000142599	1	RERE	intron	0	18300	0	0.225046	-0.55104	0.0528734	-0.0326367	0.00221393	0.406644	-0.955354	-0.852665	-0.811499	-0.430582	2.99836	-0.0513625
chr1-8484567-8485169	556	chr1-8484567-8485169	603	0	ENSG00000142599	1	RERE	intron	0	40769	0	0.225046	-0.55104	0.0528734	-0.0326367	0.00221393	0.406644	-0.955354	-0.852665	-0.811499	-0.430582	2.99836	-0.0513625
chr1-8575331-8576340	556	chr1-8575331-8576340	1010	0	ENSG00000142599	1	RERE	intron	0	14500	0	0.225046	-0.55104	0.0528734	-0.0326367	0.00221393	0.406644	-0.955354	-0.852665	-0.811499	-0.430582	2.99836	-0.0513625
chr1-8605432-8606160	556	chr1-8605432-8606160	729	0	ENSG00000142599	1	RERE	intron	0	14590	0	0.225046	-0.55104	0.0528734	-0.0326367	0.00221393	0.406644	-0.955354	-0.852665	-0.811499	-0.430582	2.99836	-0.0513625
chr1-8804344-8804837	556	chr1-8804344-8804837	494	0	ENSG00000142599	1	RERE	intron	0	12627	0	0.225046	-0.55104	0.0528734	-0.0326367	0.00221393	0.406644	-0.955354	-0.852665	-0.811499	-0.430582	2.99836	-0.0513625
chr1-8815533-8815983	556	chr1-8815533-8815983	451	0	ENSG00000142599	1	RERE	intron	0	1481	0	0.225046	-0.55104	0.0528734	-0.0326367	0.00221393	0.406644	-0.955354	-0.852665	-0.811499	-0.430582	2.99836	-0.0513625
chr1-8848546-8849376	556	chr1-8848546-8849376	831	0		0		intergenic	0	21920	0	0.225046	-0.55104	0.0528734	-0.0326367	0.00221393	0.406644	-0.955354	-0.852665	-0.811499	-0.430582	2.99836	-0.0513625
chr1-8885387-8885914	556	chr1-8885387-8885914	528	0		0		intergenic	0	6137	0	0.225046	-0.55104	0.0528734	-0.0326367	0.00221393	0.406644	-0.955354	-0.852665	-0.811499	-0.430582	2.99836	-0.0513625
chr1-8889371-8890759	556	chr1-8889371-8890759	1389	0		0		intergenic	0	10121	0	0.225046	-0.55104	0.0528734	-0.0326367	0.00221393	0.406644	-0.955354	-0.852665	-0.811499	-0.430582	2.99836	-0.0513625
chr1-8938373-8939516	556	chr1-8938373-8939516	1144	0		0		intergenic	0	6350	0	0.225046	-0.55104	0.0528734	-0.0326367	0.00221393	0.406644	-0.955354	-0.852665	-0.811499	-0.430582	2.99836	-0.0513625
chr1-8941840-8942157	556	chr1-8941840-8942157	318	0		0		intergenic	0	3709	0	0.225046	-0.55104	0.0528734	-0.0326367	0.00221393	0.406644	-0.955354	-0.852665	-0.811499	-0.430582	2.99836	-0.0513625
chr1-8951074-8951556	556	chr1-8951074-8951556	483	1	ENSG00000131686	1	CA6	exon	0	5186	0	0.225046	-0.55104	0.0528734	-0.0326367	0.00221393	0.406644	-0.955354	-0.852665	-0.811499	-0.430582	2.99836	-0.0513625
chr1-8987690-8988376	556	chr1-8987690-8988376	687	0		0		intergenic	0	37968	0	0.225046	-0.55104	0.0528734	-0.0326367	0.00221393	0.406644	-0.955354	-0.852665	-0.811499	-0.430582	2.99836	-0.0513625
chr1-8989876-8990284	556	chr1-8989876-8990284	409	0		0		intergenic	0	36060	0	0.225046	-0.55104	0.0528734	-0.0326367	0.00221393	0.406644	-0.955354	-0.852665	-0.811499	-0.430582	2.99836	-0.0513625
chr1-9013843-9014704	556	chr1-9013843-9014704	862	1	ENSG00000197241	1	SLC2A7	exon	0	11640	0	0.225046	-0.55104	0.0528734	-0.0326367	0.00221393	0.406644	-0.955354	-0.852665	-0.811499	-0.430582	2.99836	-0.0513625
chr1-9017429-9018757	556	chr1-9017429-9018757	1329	1	ENSG00000197241	1	SLC2A7	exon	0	7587	0	0.225046	-0.55104	0.0528734	-0.0326367	0.00221393	0.406644	-0.955354	-0.852665	-0.811499	-0.430582	2.99836	-0.0513625
chr1-9064336-9065819	556	chr1-9064336-9065819	1484	0	ENSG00000142583	1	SLC2A5	intron	0	3784	0	0.225046	-0.55104	0.0528734	-0.0326367	0.00221393	0.406644	-0.955354	-0.852665	-0.811499	-0.430582	2.99836	-0.0513625
chr1-9065927-9066473	556	chr1-9065927-9066473	547	0	ENSG00000142583	1	SLC2A5	intron	0	3130	0	0.225046	-0.55104	0.0528734	-0.0326367	0.00221393	0.406644	-0.955354	-0.852665	-0.811499	-0.430582	2.99836	-0.0513625
chr1-9106929-9107436	556	chr1-9106929-9107436	508	0	ENSG00000180758	1	GPR157	intron	0	3933	0	0.225046	-0.55104	0.0528734	-0.0326367	0.00221393	0.406644	-0.955354	-0.852665	-0.811499	-0.430582	2.99836	-0.0513625
chr1-9120223-9120902	556	chr1-9120223-9120902	680	0	ENSG00000180758	1	GPR157	intron	0	7878	0	0.225046	-0.55104	0.0528734	-0.0326367	0.00221393	0.406644	-0.955354	-0.852665	-0.811499	-0.430582	2.99836	-0.0513625
chr1-9121693-9122604	556	chr1-9121693-9122604	912	0	ENSG00000180758	1	GPR157	intron	0	6176	0	0.225046	-0.55104	0.0528734	-0.0326367	0.00221393	0.406644	-0.955354	-0.852665	-0.811499	-0.430582	2.99836	-0.0513625
chr1-9134314-9135250	556	chr1-9134314-9135250	937	0		0		intergenic	0	5143	0	0.225046	-0.55104	0.0528734	-0.0326367	0.00221393	0.406644	-0.955354	-0.852665	-0.811499	-0.430582	2.99836	-0.0513625
chr1-9149397-9150448	556	chr1-9149397-9150448	1052	0		0		intergenic	0	20226	0	0.225046	-0.55104	0.0528734	-0.0326367	0.00221393	0.406644	-0.955354	-0.852665	-0.811499	-0.430582	2.99836	-0.0513625
chr1-9162298-9163382	556	chr1-9162298-9163382	1085	0		0		intergenic	0	33127	0	0.225046	-0.55104	0.0528734	-0.0326367	0.00221393	0.406644	-0.955354	-0.852665	-0.811499	-0.430582	2.99836	-0.0513625
chr1-9188966-9190132	556	chr1-9188966-9190132	1167	0		0		intergenic	0	44642	0	0.225046	-0.55104	0.0528734	-0.0326367	0.00221393	0.406644	-0.955354	-0.852665	-0.811499	-0.430582	2.99836	-0.0513625
chr1-9193205-9193585	556	chr1-9193205-9193585	381	0		0		intergenic	0	41189	0	0.225046	-0.55104	0.0528734	-0.0326367	0.00221393	0.406644	-0.955354	-0.852665	-0.811499	-0.430582	2.99836	-0.0513625
chr1-9225058-9226024	556	chr1-9225058-9226024	967	0		0		intergenic	0	8750	0	0.225046	-0.55104	0.0528734	-0.0326367	0.00221393	0.406644	-0.955354	-0.852665	-0.811499	-0.430582	2.99836	-0.0513625
[truncated: 44,165 more rows]
