# Supplementary material for: Single-cell roadmap of human gonadal development
Source: Research Square preprint supplement (doi:10.21203/rs.3.rs-496470/v1), 2021-05-21
Supplement: Supplementary file 2 [file 32c8f63e8d884b7af344f0fe.xlsx]

## Sheet: 1_cellranger10x_RNA_library_sta
sample	number of cells	reads per cell	genes per cell
FCA_GND8047884	1325	137061	4111
FCA_GND8047885	9242	17193	2165
FCA_GND8103049	4457	35554	1646
FCA_GND8103050	11534	14063	1670
FCA_GND8103052	2863	37799	781
FCA_GND8103053	3481	60671	1153
FCA_GND8125922	4864	31789	2876
FCA_GND8125923	4213	34260	3134
FCA_GND8125924	3278	50689	2110
FCA_GND8125925	3229	55659	2319
FCA_GND8289579	4731	35955	1453
FCA_GND8289580	10913	14468	1530
FCA_GND8622625	1192	322824	1908
FCA_GND8622626	1081	378673	1920
FCA_GND8622627	2835	137499	3723
FCA_GND8622628	5353	80084	3105
FCA_GND8622629	3272	119638	2881
FCA_GND8622630	100	4042118	2558
FCA_GND8622631	3645	110793	3148
FCA_GND8715407	5121	123594	1672
FCA_GND8715408	3379	153841	1428
FCA_GND8715519	5840	104521	1468
FCA_GND8784458	8710	77947	2241
FCA_GND8784459	699	797198	2764
FCA_GND8784460	7006	75312	2496
FCA_GND8810844	3055	184993	2141
FCA_GND8810845	1764	317959	1514
FCA_GND8810846	2231	212760	794
FCA_GND8810848	2750	154760	2750
FCA_GND8810850	2202	294929	1076
FCA_GND8810851	11165	43329	2334
FCA_GND8810852	5296	80892	1484
FCA_GND9331965	10372	49583	2355
FCA_GND9331966	27684	20356	1140
FCA_GND9331967	14346	40066	1432
FCA_GND9331968	11162	53079	1534
FCA_GND9331969	870	569925	1574
FCA_GND9331970	12289	40606	1677
FCA_GND9295208	1570	352872	1574
FCA_GND9295209	1799	320228	1496
FCA_GND9295210	10000	53906	1989
FCA_GND9295212	10000	52923	2108
FCA_GND9332061	10674	61645	1092
FCA_GND9332062	21666	27888	1176
FCA_GND9332064	1598	392493	3668
FCA_GND9332065	2248	305660	1980
HD_F_GON9460406	10948	58411	2616
HD_F_GON9460407	10081	78798	2824
HD_F_GON9460408	10802	76027	2188
HD_F_GON9479968	1553	471475	1444
HD_F_GON9479969	5000	165953	1596
HD_F_GON9479970	6287	133969	2159
HD_F_GON9480063	8634	94629	2184
HD_F_GON9480064	8375	97614	2156
HD_F_GON9480066	5972	126248	3008
HD_F_GON9883862	7597	96289	2506
HD_F_GON9883863	8095	77963	2425
HD_F_GON9883868	5225	106594	1314
HD_F_GON9699334	8847	84937	1943
HD_F_GON9699332	8232	82782	2349
HD_F_GON9699337	2087	430214	1853
HD_F_GON9883867	7644	86999	1536
HD_F_GON9883866	2017	296574	1504
HD_F_GON9883859	4630	145000	1350

## Sheet: 2_cell_stats_annotatio_scRNAseq
barcode	n_genes	sample	individual	sex	process	percent_mito	n_counts	scrublet_score	scrublet_cluster_score	bonf_pval	PCW	sample_source	louvain	lineage	cell_type
FCA_GND8047885_AAACCTGAGCACACAG	2554	FCA_GND8047885	F81	female	CD45-	0.0358918	7244	0.075718	0.110867	1	8.8	N	1	Supporting	Supp_preGC_IIa
FCA_GND8047885_AAACCTGAGCACGCCT	2032	FCA_GND8047885	F81	female	CD45-	0.0103559	5311	0.0614786	0.0415584	1	8.8	N	1	Supporting	Supp_preGC_IIb
FCA_GND8047885_AAACCTGAGCCACGCT	2256	FCA_GND8047885	F81	female	CD45-	0.0131103	4424	0.0718512	0.0937808	1	8.8	N	1	Supporting	Supp_sLGR5_female
FCA_GND8047885_AAACCTGAGTACGTAA	2196	FCA_GND8047885	F81	female	CD45-	0.0288612	5128	0.110867	0.104762	1	8.8	N	1	Supporting	Supp_preGC_IIa
FCA_GND8047885_AAACCTGAGTGTTGAA	1895	FCA_GND8047885	F81	female	CD45-	0.0464588	4843	0.0554324	0.0937808	1	8.8	N	5	Coel Epi	Supp_ovarianSurf
FCA_GND8047885_AAACCTGCACAAGTAA	2219	FCA_GND8047885	F81	female	CD45-	0.0237197	5565	0.145119	0.114094	1	8.8	N	1	Supporting	Supp_preGC_IIa
FCA_GND8047885_AAACCTGCATACGCTA	2765	FCA_GND8047885	F81	female	CD45-	0.0574211	5956	0.114094	0.12093	1	8.8	N	1	Supporting	Supp_preGC_I
FCA_GND8047885_AAACCTGGTCCAACTA	2597	FCA_GND8047885	F81	female	CD45-	0.0475162	6019	0.0718512	0.075718	1	8.8	N	1	Supporting	Supp_preGC_I
FCA_GND8047885_AAACCTGGTCCCTACT	2571	FCA_GND8047885	F81	female	CD45-	0.00737636	5965	0.132262	0.0900437	1	8.8	N	1	Supporting	Supp_preGC_IIb
FCA_GND8047885_AAACCTGGTCTCTCGT	2222	FCA_GND8047885	F81	female	CD45-	0.0218845	4935	0.0599078	0.104762	1	8.8	N	1	Supporting	Supp_preGC_IIb
FCA_GND8047885_AAACCTGGTGAGTGAC	1380	FCA_GND8047885	F81	female	CD45-	0.033631	3360	0.0554324	0.0404624	1	8.8	N	2	Mesenchymal_LHX9_ARX	Mesen_dorsalMesentery
FCA_GND8047885_AAACCTGGTGCACGAA	2103	FCA_GND8047885	F81	female	CD45-	0.065638	4342	0.101871	0.0664506	1	8.8	N	1	Supporting	Supp_sLGR5_female
FCA_GND8047885_AAACCTGGTTCCTCCA	1346	FCA_GND8047885	F81	female	CD45-	0.0183595	3377	0.0486787	0.0606932	1	8.8	N	2	Mesenchymal_LHX9_ARX	Mesen_ovarianStroma
FCA_GND8047885_AAACCTGGTTCGGGCT	2994	FCA_GND8047885	F81	female	CD45-	0.0357726	7967	0.0647482	0.0900437	1	8.8	N	1	Supporting	Supp_preGC_IIa
FCA_GND8047885_AAACCTGTCCTAGAAC	2464	FCA_GND8047885	F81	female	CD45-	0.0258747	6802	0.0499648	0.0181832	1	8.8	N	0	Mesenchymal_GATA2_NR2F1	Mesenchymal_GATA2_NR2F1
FCA_GND8047885_AAACCTGTCGGCCGAT	1812	FCA_GND8047885	F81	female	CD45-	0.0405574	4808	0.0819672	0.0737564	1	8.8	N	0	Mesenchymal_GATA2_NR2F1	Mesen_dorsalMesentery
FCA_GND8047885_AAACCTGTCTCCAGGG	1838	FCA_GND8047885	F81	female	CD45-	0.0335284	4444	0.189711	0.0606932	1	8.8	N	2	Mesenchymal_LHX9_ARX	Mesen_ovarianStroma
FCA_GND8047885_AAACGGGAGAAGGGTA	3019	FCA_GND8047885	F81	female	CD45-	0.0378385	8087	0.61039	0.128329	1	8.8	N	1	Supporting	Supp_preGC_I
FCA_GND8047885_AAACGGGAGAGGTTAT	2006	FCA_GND8047885	F81	female	CD45-	0.0393843	4418	0.165217	0.15983	1	8.8	N	1	Supporting	Supp_sLGR5_female
FCA_GND8047885_AAACGGGAGGACAGAA	1506	FCA_GND8047885	F81	female	CD45-	0.0438513	3147	0.107759	0.117446	1	8.8	N	7	Endothelial	Endothelial
FCA_GND8047885_AAACGGGAGGGATACC	1825	FCA_GND8047885	F81	female	CD45-	0.0733405	3736	0.0554324	0.0554324	1	8.8	N	1	Supporting	Supp_preGC_I
FCA_GND8047885_AAACGGGCAAAGCAAT	2101	FCA_GND8047885	F81	female	CD45-	0.0291492	5489	0.104762	0.117446	1	8.8	N	7	Endothelial	Endothelial
FCA_GND8047885_AAACGGGCAACGATCT	1626	FCA_GND8047885	F81	female	CD45-	0.0361688	2986	0.0383407	0.0599078	1	8.8	N	1	Supporting	Supp_preGC_I
FCA_GND8047885_AAACGGGCAAGGCTCC	1962	FCA_GND8047885	F81	female	CD45-	0.0301333	5177	0.0664506	0.0718512	1	8.8	N	0	Mesenchymal_GATA2_NR2F1	Mesenchymal_GATA2_NR2F1
FCA_GND8047885_AAACGGGCACAGGAGT	2515	FCA_GND8047885	F81	female	CD45-	0.057428	5311	0.0630915	0.0664506	1	8.8	N	1	Supporting	Supp_sLGR5_female
FCA_GND8047885_AAACGGGCACATCCGG	2705	FCA_GND8047885	F81	female	CD45-	0.0627463	6343	0.128329	0.147458	1	8.8	N	1	Supporting	Supp_preGC_I
FCA_GND8047885_AAACGGGCATGCGCAC	1181	FCA_GND8047885	F81	female	CD45-	0.0318942	2571	0.0212325	0.0334129	1	8.8	N	0	Mesenchymal_GATA2_NR2F1	Mesen_dorsalMesentery
FCA_GND8047885_AAACGGGCATGTCCTC	2243	FCA_GND8047885	F81	female	CD45-	0.042349	5313	0.259259	0.15983	1	8.8	N	1	Supporting	Supp_preGC_I
FCA_GND8047885_AAACGGGGTACCGTTA	1969	FCA_GND8047885	F81	female	CD45-	0.0265659	4630	0.140645	0.0554324	1	8.8	N	2	Mesenchymal_LHX9_ARX	Mesen_ovarianStroma
FCA_GND8047885_AAACGGGGTATATGAG	2581	FCA_GND8047885	F81	female	CD45-	0.0726744	5504	0.0777385	0.11577	1	8.8	N	1	Supporting	Supp_preGC_I
FCA_GND8047885_AAACGGGGTTGGGACA	2153	FCA_GND8047885	F81	female	CD45-	0.0309137	4367	0.0888252	0.211909	1	8.8	N	1	Supporting	Supp_preGC_I
FCA_GND8047885_AAACGGGTCATTGCGA	2505	FCA_GND8047885	F81	female	CD45-	0.0520288	6112	0.204082	0.128329	1	8.8	N	1	Supporting	Supp_preGC_IIb
FCA_GND8047885_AAACGGGTCCAACCAA	1962	FCA_GND8047885	F81	female	CD45-	0.0532661	3567	0.0415584	0.110867	1	8.8	N	1	Supporting	Supp_preGC_I
FCA_GND8047885_AAACGGGTCGTGGACC	1841	FCA_GND8047885	F81	female	CD45-	0.0718897	3408	0.101871	0.0841813	1	8.8	N	1	Supporting	Supp_preGC_I
FCA_GND8047885_AAACGGGTCTGTTGAG	1375	FCA_GND8047885	F81	female	CD45-	0.0446313	3092	0.0426789	0.0526316	1	8.8	N	2	Mesenchymal_LHX9_ARX	Mesen_testisStroma
FCA_GND8047885_AAACGGGTCTTGCATT	1432	FCA_GND8047885	F81	female	CD45-	0.0407028	3415	0.0614786	0.0718512	1	8.8	N	2	Mesenchymal_LHX9_ARX	Mesen_ovarianStroma
FCA_GND8047885_AAAGATGAGACAAGCC	1950	FCA_GND8047885	F81	female	CD45-	0.0299103	5015	0.0334129	0.0334129	1	8.8	N	0	Mesenchymal_GATA2_NR2F1	Mesenchymal_GATA2_NR2F1
FCA_GND8047885_AAAGATGCAAGGGTCA	2562	FCA_GND8047885	F81	female	CD45-	0.00508801	7272	0.0461957	0.0415584	1	8.8	N	1	Supporting	Supp_preGC_IIb
FCA_GND8047885_AAAGATGCACGAAATA	2004	FCA_GND8047885	F81	female	CD45-	0.0527973	4129	0.0583776	0.0798206	1	8.8	N	1	Supporting	Supp_preGC_I
FCA_GND8047885_AAAGATGCAGCTCCGA	1733	FCA_GND8047885	F81	female	CD45-	0.0499686	3182	0.107759	0.126442	1	8.8	N	1	Supporting	Supp_preGC_I
FCA_GND8047885_AAAGATGCATCCAACA	1987	FCA_GND8047885	F81	female	CD45-	0.0311731	3657	0.0718512	0.101871	1	8.8	N	1	Supporting	Supp_preGC_I
FCA_GND8047885_AAAGATGGTAGAGGAA	2571	FCA_GND8047885	F81	female	CD45-	0.0283246	7061	0.117446	0.104762	1	8.8	N	1	Supporting	Supp_preGC_I
FCA_GND8047885_AAAGATGGTATAAACG	2072	FCA_GND8047885	F81	female	CD45-	0.0033415	4489	0.0614786	0.07	1	8.8	N	1	Supporting	Supp_preGC_IIb
FCA_GND8047885_AAAGATGGTCCCTTGT	2911	FCA_GND8047885	F81	female	CD45-	0.0872716	6623	0.128329	0.0798206	1	8.8	N	1	Supporting	Supp_preGC_I
FCA_GND8047885_AAAGATGGTGGACGAT	2845	FCA_GND8047885	F81	female	CD45-	0.0538904	6439	0.110867	0.0900437	1	8.8	N	1	Supporting	Supp_preGC_IIb
FCA_GND8047885_AAAGATGTCCGAACGC	2722	FCA_GND8047885	F81	female	CD45-	0.0517663	7360	0.0864662	0.107759	1	8.8	N	1	Supporting	Supp_preGC_IIa
FCA_GND8047885_AAAGATGTCTCGTTTA	2073	FCA_GND8047885	F81	female	CD45-	0.0357757	6401	0.0449966	0.0614786	1	8.8	N	2	Mesenchymal_LHX9_ARX	Mesen_ovarianStroma
FCA_GND8047885_AAAGCAAAGACTAGAT	2408	FCA_GND8047885	F81	female	CD45-	0.075905	5138	0.15983	0.112481	1	8.8	N	1	Supporting	Supp_preGC_I
FCA_GND8047885_AAAGCAAAGAGCAATT	2683	FCA_GND8047885	F81	female	CD45-	0.044955	7007	0.165217	0.147458	1	8.8	N	1	Supporting	Supp_preGC_I
FCA_GND8047885_AAAGCAAAGGAGTTGC	2424	FCA_GND8047885	F81	female	CD45-	0.0671316	4588	0.124555	0.0841813	1	8.8	N	1	Supporting	Supp_preGC_I
FCA_GND8047885_AAAGCAAAGGTGATTA	2543	FCA_GND8047885	F81	female	CD45-	0.0288511	7764	0.0568862	0.0737564	1	8.8	N	0	Mesenchymal_GATA2_NR2F1	Mesen_dorsalMesentery
FCA_GND8047885_AAAGCAACAAAGTGCG	1309	FCA_GND8047885	F81	female	CD45-	0.0395856	2703	0.00824295	0.0404624	1	8.8	N	0	Mesenchymal_GATA2_NR2F1	Mesenchymal_GATA2_NR2F1
FCA_GND8047885_AAAGCAACAATAGAGT	2324	FCA_GND8047885	F81	female	CD45-	0.0493747	4638	0.0647482	0.0554324	1	8.8	N	1	Supporting	Supp_preGC_I
FCA_GND8047885_AAAGCAACACTCGACG	2205	FCA_GND8047885	F81	female	CD45-	0.0226475	6270	0.0912621	0.0787796	1	8.8	N	2	Mesenchymal_LHX9_ARX	Mesen_ovarianStroma
FCA_GND8047885_AAAGCAACAGGCAGTA	2307	FCA_GND8047885	F81	female	CD45-	0.0262002	6832	0.0777385	0.0937808	1	8.8	N	0	Mesenchymal_GATA2_NR2F1	Mesenchymal_GATA2_NR2F1
FCA_GND8047885_AAAGCAAGTATCGCAT	2229	FCA_GND8047885	F81	female	CD45-	0.0132998	5564	0.0383407	0.0480507	1	8.8	N	1	Supporting	Supp_preGC_IIb
FCA_GND8047885_AAAGCAAGTCACAAGG	1838	FCA_GND8047885	F81	female	CD45-	0.0461144	3513	0.0912621	0.104762	1	8.8	N	1	Supporting	Supp_preGC_I
FCA_GND8047885_AAAGCAAGTGAGGGTT	2338	FCA_GND8047885	F81	female	CD45-	0.0652639	5608	0.0647482	0.211909	1	8.8	N	1	Supporting	Supp_preGC_I
FCA_GND8047885_AAAGCAATCATAAAGG	2270	FCA_GND8047885	F81	female	CD45-	0.0294775	4919	0.110867	0.119188	1	8.8	N	1	Supporting	Supp_preGC_IIb
FCA_GND8047885_AAAGCAATCCCTAATT	2218	FCA_GND8047885	F81	female	CD45-	0.036122	5343	0.114094	0.128329	1	8.8	N	5	Coel Epi	Supp_ovarianSurf
FCA_GND8047885_AAAGCAATCGCGTTTC	2366	FCA_GND8047885	F81	female	CD45-	0.0756565	4798	0.0841813	0.109313	1	8.8	N	1	Supporting	Supp_preGC_IIc
FCA_GND8047885_AAAGCAATCGGCTACG	2700	FCA_GND8047885	F81	female	CD45-	0.00552085	6883	0.0306891	0.0410827	1	8.8	N	1	Supporting	Supp_preGC_IIb
FCA_GND8047885_AAAGTAGAGTCGTTTG	1768	FCA_GND8047885	F81	female	CD45-	0.0605469	3584	0.0583776	0.0526316	1	8.8	N	1	Supporting	Supp_preGC_I
FCA_GND8047885_AAAGTAGAGTTAAGTG	1959	FCA_GND8047885	F81	female	CD45-	0.030837	4994	0.0415584	0.0554324	1	8.8	N	0	Mesenchymal_GATA2_NR2F1	Mesen_dorsalMesentery
FCA_GND8047885_AAAGTAGCAAGAAGAG	1486	FCA_GND8047885	F81	female	CD45-	0.0555962	2734	0.0568862	0.0599078	1	8.8	N	1	Supporting	Supp_preGC_I
FCA_GND8047885_AAAGTAGCAATCCAAC	1910	FCA_GND8047885	F81	female	CD45-	0.0274686	4223	0.0864662	0.0606932	1	8.8	N	2	Mesenchymal_LHX9_ARX	Mesen_ovarianStroma
FCA_GND8047885_AAAGTAGCATCATCCC	2141	FCA_GND8047885	F81	female	CD45-	0.0100543	4973	0.0526316	0.0474372	1	8.8	N	1	Supporting	Supp_preGC_IIb
FCA_GND8047885_AAAGTAGCATCGACGC	1971	FCA_GND8047885	F81	female	CD45-	0.0610596	4209	0.0583776	0.104762	1	8.8	N	1	Supporting	Supp_preGC_I
FCA_GND8047885_AAAGTAGGTCTCACCT	1367	FCA_GND8047885	F81	female	CD45-	0.018475	2977	0.0219436	0.0334129	1	8.8	N	0	Mesenchymal_GATA2_NR2F1	Mesen_dorsalMesentery
FCA_GND8047885_AAAGTAGGTTACGCGC	1425	FCA_GND8047885	F81	female	CD45-	0.0657947	2523	0.0912621	0.0554324	1	8.8	N	1	Supporting	Supp_preGC_I
FCA_GND8047885_AAAGTAGTCAACTCTT	1966	FCA_GND8047885	F81	female	CD45-	0.0623448	3625	0.15983	0.112481	1	8.8	N	1	Supporting	Supp_preGC_I
FCA_GND8047885_AAAGTAGTCACGCATA	2097	FCA_GND8047885	F81	female	CD45-	0.0350547	5306	0.0449966	0.0798206	1	8.8	N	1	Supporting	Supp_preGC_IIa
FCA_GND8047885_AAAGTAGTCAGCCTAA	1447	FCA_GND8047885	F81	female	CD45-	0.0249206	4093	0.0198473	0.0606932	1	8.8	N	2	Mesenchymal_LHX9_ARX	Mesen_ovarianStroma
FCA_GND8047885_AAAGTAGTCCCTCTTT	1949	FCA_GND8047885	F81	female	CD45-	0.0431894	5117	0.0841813	0.075718	1	8.8	N	2	Mesenchymal_LHX9_ARX	Mesen_ovarianStroma
FCA_GND8047885_AAAGTAGTCGTCTGAA	1943	FCA_GND8047885	F81	female	CD45-	0.045081	4259	0.075718	0.104762	1	8.8	N	1	Supporting	Supp_preGC_I
FCA_GND8047885_AAATGCCAGGCACATG	2006	FCA_GND8047885	F81	female	CD45-	0.0197044	4669	0.124555	0.117446	1	8.8	N	7	Endothelial	Endothelial
FCA_GND8047885_AAATGCCAGGGTTTCT	2429	FCA_GND8047885	F81	female	CD45-	0.0185864	7371	0.154696	0.165217	1	8.8	N	7	Endothelial	Endothelial
FCA_GND8047885_AAATGCCAGGTGACCA	2108	FCA_GND8047885	F81	female	CD45-	0.0660705	4026	0.0682005	0.104762	1	8.8	N	1	Supporting	Supp_preGC_I
FCA_GND8047885_AAATGCCCAACTTGAC	1965	FCA_GND8047885	F81	female	CD45-	0.0572094	3863	0.170877	0.112481	1	8.8	N	1	Supporting	Supp_preGC_I
FCA_GND8047885_AAATGCCCAATCTACG	1659	FCA_GND8047885	F81	female	CD45-	0.0469662	3428	0.0404624	0.104762	1	8.8	N	1	Supporting	Supp_preGC_I
FCA_GND8047885_AAATGCCCACCGAAAG	2026	FCA_GND8047885	F81	female	CD45-	0.0737282	4069	0.136364	0.109313	1	8.8	N	1	Supporting	Supp_sLGR5_female
FCA_GND8047885_AAATGCCCAGCCTTTC	2307	FCA_GND8047885	F81	female	CD45-	0.0392598	5782	0.0864662	0.15983	1	8.8	N	1	Supporting	Supp_preGC_IIa
FCA_GND8047885_AAATGCCCATAGTAAG	1862	FCA_GND8047885	F81	female	CD45-	0.0293565	4258	0.128329	0.0718512	1	8.8	N	0	Mesenchymal_GATA2_NR2F1	Mesenchymal_GATA2_NR2F1
FCA_GND8047885_AAATGCCCATCGATGT	2059	FCA_GND8047885	F81	female	CD45-	0.00825385	5452	0.0363077	0.128329	1	8.8	N	1	Supporting	Supp_preGC_IIb
FCA_GND8047885_AAATGCCGTGGTAACG	2316	FCA_GND8047885	F81	female	CD45-	0.049525	4947	0.15983	0.104762	1	8.8	N	1	Supporting	Supp_preGC_I
FCA_GND8047885_AAATGCCGTTTGACAC	2556	FCA_GND8047885	F81	female	CD45-	0.0157521	5777	0.34375	0.147458	1	8.8	N	1	Supporting	Supp_preGC_I
FCA_GND8047885_AAATGCCTCATGCTCC	1496	FCA_GND8047885	F81	female	CD45-	0.0408377	2865	0.0599078	0.0599078	1	8.8	N	1	Supporting	Supp_preGC_I
FCA_GND8047885_AAATGCCTCCACGACG	2419	FCA_GND8047885	F81	female	CD45-	0.0704685	5208	0.124555	0.109313	1	8.8	N	1	Supporting	Supp_preGC_I
FCA_GND8047885_AAATGCCTCCCTTGTG	2680	FCA_GND8047885	F81	female	CD45-	0.0660999	5764	0.110867	0.211909	1	8.8	N	1	Supporting	Supp_preGC_I
FCA_GND8047885_AAATGCCTCCGCATCT	2506	FCA_GND8047885	F81	female	CD45-	0.0551823	6252	0.0937808	0.147458	1	8.8	N	1	Supporting	Supp_preGC_I
FCA_GND8047885_AACACGTAGAAGATTC	2025	FCA_GND8047885	F81	female	CD45-	0.0274687	5752	0.107759	0.0614786	1	8.8	N	2	Mesenchymal_LHX9_ARX	Mesen_ovarianStroma
FCA_GND8047885_AACACGTAGCCACTAT	2724	FCA_GND8047885	F81	female	CD45-	0.0134591	7950	0.0937808	0.0963855	1	8.8	N	1	Supporting	Supp_preGC_IIb
FCA_GND8047885_AACACGTAGGGAAACA	2286	FCA_GND8047885	F81	female	CD45-	0.035893	6993	0.0864662	0.0718512	1	8.8	N	2	Mesenchymal_LHX9_ARX	Mesen_ovarianStroma
FCA_GND8047885_AACACGTCAAGAGGCT	965	FCA_GND8047885	F81	female	CD45-	0.0250813	2153	0.110867	0.117446	1	8.8	N	0	Mesenchymal_GATA2_NR2F1	Mesenchymal_GATA2_NR2F1
FCA_GND8047885_AACACGTCACTGTCGG	2333	FCA_GND8047885	F81	female	CD45-	0.0642601	5291	0.176829	0.15983	1	8.8	N	1	Supporting	Supp_preGC_I
FCA_GND8047885_AACACGTCAGCTGTTA	1900	FCA_GND8047885	F81	female	CD45-	0.0767991	3724	0.124555	0.112481	1	8.8	N	1	Supporting	Supp_preGC_I
FCA_GND8047885_AACACGTCATATGAGA	1478	FCA_GND8047885	F81	female	CD45-	0.0405265	2887	0.12093	0.0614786	1	8.8	N	1	Supporting	Supp_preGC_IIa
FCA_GND8047885_AACACGTCATGTTCCC	1174	FCA_GND8047885	F81	female	CD45-	0.0631296	2978	0.0461957	0.0737564	1	8.8	N	0	Mesenchymal_GATA2_NR2F1	Mesen_dorsalMesentery
FCA_GND8047885_AACACGTGTCGTTGTA	1987	FCA_GND8047885	F81	female	CD45-	0.00966088	5072	0.0841813	0.0937808	1	8.8	N	1	Supporting	Supp_preGC_IIb
FCA_GND8047885_AACACGTGTGAGGGAG	2482	FCA_GND8047885	F81	female	CD45-	0.00674897	6075	0.0512821	0.0718512	1	8.8	N	1	Supporting	Supp_preGC_IIa
FCA_GND8047885_AACACGTGTTGTACAC	1652	FCA_GND8047885	F81	female	CD45-	0.0704368	2953	0.15983	0.0599078	1	8.8	N	1	Supporting	Supp_preGC_I
FCA_GND8047885_AACACGTTCATTCACT	2115	FCA_GND8047885	F81	female	CD45-	0.0101533	5220	0.0474227	0.106369	1	8.8	N	1	Supporting	Supp_preGC_IIa
FCA_GND8047885_AACACGTTCATTGCGA	3602	FCA_GND8047885	F81	female	CD45-	0.0833992	8849	0.101871	0.11577	1	8.8	N	1	Supporting	Supp_preGC_I
FCA_GND8047885_AACACGTTCGATGAGG	2428	FCA_GND8047885	F81	female	CD45-	0.0714421	5277	0.248509	0.12093	1	8.8	N	1	Supporting	Supp_preGC_I
FCA_GND8047885_AACACGTTCTGGTTCC	1619	FCA_GND8047885	F81	female	CD45-	0.0192926	4043	0.0682005	0.07	1	8.8	N	2	Mesenchymal_LHX9_ARX	Mesen_testisStroma
FCA_GND8047885_AACCATGAGACTAAGT	1934	FCA_GND8047885	F81	female	CD45-	0.029229	4345	0.0124481	0.0130112	1	8.8	N	0	Mesenchymal_GATA2_NR2F1	Mesenchymal_GATA2_NR2F1
FCA_GND8047885_AACCATGAGCCGTCGT	1613	FCA_GND8047885	F81	female	CD45-	0.00743494	3228	0.0415584	0.104762	1	8.8	N	1	Supporting	Supp_preGC_IIa
FCA_GND8047885_AACCATGCAAGCCTAT	1855	FCA_GND8047885	F81	female	CD45-	0.0368528	4423	0.0990807	0.0614786	1	8.8	N	0	Mesenchymal_GATA2_NR2F1	Mesenchymal_GATA2_NR2F1
FCA_GND8047885_AACCATGGTCTAGCCG	2387	FCA_GND8047885	F81	female	CD45-	0.0592723	5112	0.145119	0.109313	1	8.8	N	1	Supporting	Supp_sLGR5_female
FCA_GND8047885_AACCATGGTGACTCAT	2650	FCA_GND8047885	F81	female	CD45-	0.0184874	5950	0.283186	0.147458	1	8.8	N	1	Supporting	Supp_preGC_I
FCA_GND8047885_AACCATGGTGGTGTAG	1502	FCA_GND8047885	F81	female	CD45-	0.0307432	2960	0.132262	0.0737564	1	8.8	N	0	Mesenchymal_GATA2_NR2F1	Mesen_ovarianStroma
FCA_GND8047885_AACCATGTCACATGCA	911	FCA_GND8047885	F81	female	CD45-	0.0767213	1525	0.0404624	0.0599078	1	8.8	N	1	Supporting	Supp_preGC_I
FCA_GND8047885_AACCATGTCACGAAGG	2611	FCA_GND8047885	F81	female	CD45-	0.00584888	6326	0.114094	0.07	1	8.8	N	1	Supporting	Supp_preGC_IIb
FCA_GND8047885_AACCATGTCAGAGACG	1666	FCA_GND8047885	F81	female	CD45-	0.0253327	3908	0.0526316	0.075718	1	8.8	N	0	Mesenchymal_GATA2_NR2F1	Mesen_dorsalMesentery
FCA_GND8047885_AACCATGTCTGCGTAA	2023	FCA_GND8047885	F81	female	CD45-	0.0138753	5117	0.145119	0.104762	1	8.8	N	1	Supporting	Supp_preGC_IIa
FCA_GND8047885_AACCGCGAGAGTACCG	1945	FCA_GND8047885	F81	female	CD45-	0.0560528	4246	0.0798206	0.109313	1	8.8	N	1	Supporting	Supp_preGC_I
FCA_GND8047885_AACCGCGAGATATACG	2546	FCA_GND8047885	F81	female	CD45-	0.0320127	5654	0.204082	0.15983	1	8.8	N	1	Supporting	Supp_preGC_I
FCA_GND8047885_AACCGCGAGCACCGTC	2614	FCA_GND8047885	F81	female	CD45-	0.0348259	6231	0.0937808	0.104762	1	8.8	N	1	Supporting	Supp_preGC_IIa
FCA_GND8047885_AACCGCGAGCCAGGAT	2284	FCA_GND8047885	F81	female	CD45-	0.0406634	6271	0.124555	0.147458	1	8.8	N	5	Coel Epi	Supp_sKITLG
FCA_GND8047885_AACCGCGAGCGTCAAG	1946	FCA_GND8047885	F81	female	CD45-	0.0204265	4455	0.0912621	0.0963855	1	8.8	N	1	Supporting	Supp_preGC_IIa
FCA_GND8047885_AACCGCGAGGACGAAA	2392	FCA_GND8047885	F81	female	CD45-	0.0110234	6713	0.0912621	0.0547235	1	8.8	N	1	Supporting	Supp_preGC_IIb
FCA_GND8047885_AACCGCGCAGACTCGC	2402	FCA_GND8047885	F81	female	CD45-	0.0664214	4893	0.0614786	0.0664506	1	8.8	N	1	Supporting	Supp_sLGR5_female
FCA_GND8047885_AACCGCGGTATTCTCT	2305	FCA_GND8047885	F81	female	CD45-	0.0116688	5399	0.104762	0.147458	1	8.8	N	1	Supporting	Supp_preGC_I
FCA_GND8047885_AACCGCGGTCTTGTCC	1932	FCA_GND8047885	F81	female	CD45-	0.0719021	3922	0.107759	0.11577	1	8.8	N	1	Supporting	Supp_preGC_I
FCA_GND8047885_AACCGCGGTGAACCTT	2286	FCA_GND8047885	F81	female	CD45-	0.0138932	6406	0.0737564	0.0480507	1	8.8	N	1	Supporting	Supp_preGC_IIb
FCA_GND8047885_AACCGCGTCACCGTAA	2365	FCA_GND8047885	F81	female	CD45-	0.0443942	5744	0.132262	0.147458	1	8.8	N	1	Supporting	Supp_preGC_I
FCA_GND8047885_AACCGCGTCAGGCCCA	1781	FCA_GND8047885	F81	female	CD45-	0.0198351	4487	0.0486787	0.0404624	1	8.8	N	0	Mesenchymal_GATA2_NR2F1	Mesen_ovarianStroma
FCA_GND8047885_AACGTTGAGATAGGAG	3079	FCA_GND8047885	F81	female	CD45-	0.0511364	8624	0.183099	0.128329	1	8.8	N	5	Coel Epi	Supp_coelEpi
FCA_GND8047885_AACGTTGAGATATGGT	2919	FCA_GND8047885	F81	female	CD45-	0.0227751	8562	0.104762	0.0647482	1	8.8	N	5	Coel Epi	Supp_coelEpi
FCA_GND8047885_AACGTTGAGGATATAC	3097	FCA_GND8047885	F81	female	CD45-	0.0145592	9822	0.0568862	0.0614786	1	8.8	N	2	Mesenchymal_LHX9_ARX	Mesen_ovarianStroma
FCA_GND8047885_AACGTTGCAAGAAAGG	2691	FCA_GND8047885	F81	female	CD45-	0.0187603	6663	0.524528	0.128329	1	8.8	N	1	Supporting	Supp_preGC_IIb
FCA_GND8047885_AACGTTGCAGCGTCCA	1836	FCA_GND8047885	F81	female	CD45-	0.0830281	3276	0.075718	0.12093	1	8.8	N	1	Supporting	Supp_preGC_I
FCA_GND8047885_AACGTTGCAGTCGTGC	1537	FCA_GND8047885	F81	female	CD45-	0.0346653	3779	0.0512821	0.0647482	1	8.8	N	5	Coel Epi	Supp_coelEpi
FCA_GND8047885_AACGTTGGTCAAGCGA	1769	FCA_GND8047885	F81	female	CD45-	0.0366379	3248	0.0474227	0.11577	1	8.8	N	1	Supporting	Supp_preGC_I
FCA_GND8047885_AACGTTGGTCCGAACC	2194	FCA_GND8047885	F81	female	CD45-	0.0690966	4472	0.154696	0.0777385	1	8.8	N	1	Supporting	Supp_preGC_I
FCA_GND8047885_AACGTTGGTCTAGCCG	1793	FCA_GND8047885	F81	female	CD45-	0.0265866	4664	0.101871	0.0718512	1	8.8	N	2	Mesenchymal_LHX9_ARX	Mesen_ovarianStroma
FCA_GND8047885_AACGTTGGTGGCGAAT	1059	FCA_GND8047885	F81	female	CD45-	0.0301769	1922	0.00924703	0.0130112	1	8.8	N	0	Mesenchymal_GATA2_NR2F1	Mesenchymal_GATA2_NR2F1
FCA_GND8047885_AACGTTGGTGTGTGCC	1600	FCA_GND8047885	F81	female	CD45-	0.0363259	3854	0.0963855	0.0718512	1	8.8	N	2	Mesenchymal_LHX9_ARX	Mesen_ovarianStroma
FCA_GND8047885_AACGTTGGTTATCCGA	2505	FCA_GND8047885	F81	female	CD45-	0.0362195	6433	0.165217	0.110867	1	8.8	N	1	Supporting	Supp_preGC_IIb
FCA_GND8047885_AACGTTGGTTCCCTTG	1841	FCA_GND8047885	F81	female	CD45-	0.0500537	4655	0.0990807	0.0963855	1	8.8	N	7	Endothelial	Endothelial
FCA_GND8047885_AACGTTGGTTCTCATT	2798	FCA_GND8047885	F81	female	CD45-	0.0110402	7518	0.0315789	0.0718512	1	8.8	N	1	Supporting	Supp_preGC_IIb
FCA_GND8047885_AACGTTGTCAACCAAC	2085	FCA_GND8047885	F81	female	CD45-	0.046199	4091	0.220217	0.126442	1	8.8	N	1	Supporting	Supp_preGC_I
FCA_GND8047885_AACGTTGTCAGTTAGC	2560	FCA_GND8047885	F81	female	CD45-	0.0473075	5961	0.362398	0.109313	1	8.8	N	1	Supporting	Supp_sLGR5_female
FCA_GND8047885_AACGTTGTCGGCGCAT	2368	FCA_GND8047885	F81	female	CD45-	0.0315494	6054	0.165217	0.110867	1	8.8	N	1	Supporting	Supp_preGC_IIb
FCA_GND8047885_AACGTTGTCTTGTATC	2042	FCA_GND8047885	F81	female	CD45-	0.0181004	5138	0.0682005	0.0737564	1	8.8	N	1	Supporting	Supp_preGC_IIa
FCA_GND8047885_AACTCAGAGGAGTAGA	2416	FCA_GND8047885	F81	female	CD45-	0.044316	6228	0.0438247	0.0647482	1	8.8	N	0	Mesenchymal_GATA2_NR2F1	Mesenchymal_GATA2_NR2F1
FCA_GND8047885_AACTCAGAGGAGTTGC	3031	FCA_GND8047885	F81	female	CD45-	0.0267925	7838	0.145119	0.119188	1	8.8	N	1	Supporting	Supp_preGC_IIb
FCA_GND8047885_AACTCAGAGTCGTACT	1664	FCA_GND8047885	F81	female	CD45-	0.0266763	4161	0.0630915	0.0737564	1	8.8	N	0	Mesenchymal_GATA2_NR2F1	Mesen_dorsalMesentery
FCA_GND8047885_AACTCAGCAGACGTAG	1757	FCA_GND8047885	F81	female	CD45-	0.0471264	4350	0.154696	0.0664506	1	8.8	N	2	Mesenchymal_LHX9_ARX	Mesen_ovarianStroma
FCA_GND8047885_AACTCAGCATAGACTC	2562	FCA_GND8047885	F81	female	CD45-	0.0373456	6721	0.196694	0.114094	1	8.8	N	1	Supporting	Supp_preGC_IIa
FCA_GND8047885_AACTCAGCATTATCTC	1964	FCA_GND8047885	F81	female	CD45-	0.0303919	3751	0.104762	0.0682005	1	8.8	N	1	Supporting	Supp_preGC_IIa
FCA_GND8047885_AACTCAGGTCTCCATC	2020	FCA_GND8047885	F81	female	CD45-	0.0406504	4182	0.311005	0.114094	1	8.8	N	1	Supporting	Supp_preGC_IIb
FCA_GND8047885_AACTCAGGTCTTCGTC	1734	FCA_GND8047885	F81	female	CD45-	0.0406002	4532	0.0568862	0.0554324	1	8.8	N	0	Mesenchymal_GATA2_NR2F1	Mesen_dorsalMesentery
FCA_GND8047885_AACTCAGGTTACGGAG	1910	FCA_GND8047885	F81	female	CD45-	0.048962	5106	0.0647482	0.0606932	1	8.8	N	5	Coel Epi	Supp_ovarianSurf
FCA_GND8047885_AACTCAGGTTGCCTCT	2069	FCA_GND8047885	F81	female	CD45-	0.0258393	4915	0.15983	0.128329	1	8.8	N	5	Coel Epi	Supp_ovarianSurf
FCA_GND8047885_AACTCAGTCATCATTC	2988	FCA_GND8047885	F81	female	CD45-	0.0257302	8628	0.0937808	0.114094	1	8.8	N	1	Supporting	Supp_preGC_IIa
FCA_GND8047885_AACTCAGTCCGTCATC	2253	FCA_GND8047885	F81	female	CD45-	0.0508092	5314	0.189711	0.15983	1	8.8	N	1	Supporting	Supp_preGC_I
FCA_GND8047885_AACTCAGTCCTGTAGA	1693	FCA_GND8047885	F81	female	CD45-	0.0522268	3121	0.0568862	0.0664506	1	8.8	N	1	Supporting	Supp_sLGR5_female
FCA_GND8047885_AACTCAGTCTCGGACG	1896	FCA_GND8047885	F81	female	CD45-	0.0326644	4684	0.22905	0.07	1	8.8	N	2	Mesenchymal_LHX9_ARX	Mesen_ovarianStroma
FCA_GND8047885_AACTCCCAGAGTGAGA	1031	FCA_GND8047885	F81	female	CD45-	0.0205308	1997	0.0205339	0.0554324	1	8.8	N	0	Mesenchymal_GATA2_NR2F1	Mesen_dorsalMesentery
FCA_GND8047885_AACTCCCAGCATGGCA	2779	FCA_GND8047885	F81	female	CD45-	0.0268678	6960	0.154696	0.104762	1	8.8	N	1	Supporting	Supp_preGC_I
FCA_GND8047885_AACTCCCAGGAGTTGC	2219	FCA_GND8047885	F81	female	CD45-	0.0640605	3965	0.0937808	0.109313	1	8.8	N	1	Supporting	Supp_sLGR5_female
FCA_GND8047885_AACTCCCAGTGGAGAA	1939	FCA_GND8047885	F81	female	CD45-	0.0315504	4057	0.170877	0.109313	1	8.8	N	1	Supporting	Supp_sKITLG
FCA_GND8047885_AACTCCCAGTGTACCT	2436	FCA_GND8047885	F81	female	CD45-	0.0151515	6468	0.07	0.0937808	1	8.8	N	0	Mesenchymal_GATA2_NR2F1	Mesenchymal_GATA2_NR2F1
FCA_GND8047885_AACTCCCCAAGAAGAG	1380	FCA_GND8047885	F81	female	CD45-	0.0787802	2361	0.0888252	0.0798206	1	8.8	N	1	Supporting	Supp_sLGR5_female
FCA_GND8047885_AACTCCCGTTAGAACA	2239	FCA_GND8047885	F81	female	CD45-	0.0213425	5810	0.149798	0.0937808	1	8.8	N	1	Supporting	Supp_preGC_IIa
FCA_GND8047885_AACTCCCGTTCCACTC	3281	FCA_GND8047885	F81	female	CD45-	0.0262999	11597	0.0937808	0.0876457	1	8.8	N	2	Mesenchymal_LHX9_ARX	Mesen_ovarianStroma
FCA_GND8047885_AACTCCCTCAGCATGT	3029	FCA_GND8047885	F81	female	CD45-	0.0820895	6700	0.0777385	0.0664506	1	8.8	N	1	Supporting	Supp_sLGR5_female
FCA_GND8047885_AACTCCCTCATGTAGC	2721	FCA_GND8047885	F81	female	CD45-	0.0472428	6075	0.176829	0.11577	1	8.8	N	1	Supporting	Supp_preGC_I
FCA_GND8047885_AACTCCCTCATGTCTT	3393	FCA_GND8047885	F81	female	CD45-	0.052185	8604	0.259259	0.12093	1	8.8	N	1	Supporting	Supp_preGC_I
FCA_GND8047885_AACTCCCTCCGGCACA	2329	FCA_GND8047885	F81	female	CD45-	0.0666557	6061	0.128329	0.107759	1	8.8	N	1	Supporting	Supp_preGC_IIa
FCA_GND8047885_AACTCCCTCCTCTAGC	2370	FCA_GND8047885	F81	female	CD45-	0.0166763	6956	0.0599078	0.0787796	1	8.8	N	2	Mesenchymal_LHX9_ARX	Mesen_ovarianStroma
FCA_GND8047885_AACTCTTAGCCAGTAG	2657	FCA_GND8047885	F81	female	CD45-	0.0573402	6226	0.296552	0.238462	0.826584	8.8	N	1	Supporting	Supp_preGC_I
FCA_GND8047885_AACTCTTAGCCAGTTT	2256	FCA_GND8047885	F81	female	CD45-	0.0741243	4425	0.176829	0.112481	1	8.8	N	1	Supporting	Supp_preGC_I
FCA_GND8047885_AACTCTTAGGCAATTA	2513	FCA_GND8047885	F81	female	CD45-	0.00787402	6477	0.0449966	0.07	1	8.8	N	1	Supporting	Supp_preGC_IIb
FCA_GND8047885_AACTCTTAGTACGTTC	2570	FCA_GND8047885	F81	female	CD45-	0.0595833	5807	0.220217	0.0841813	1	8.8	N	1	Supporting	Supp_preGC_I
FCA_GND8047885_AACTCTTAGTTAGCGG	2095	FCA_GND8047885	F81	female	CD45-	0.0217286	6167	0.075718	0.0718512	1	8.8	N	2	Mesenchymal_LHX9_ARX	Mesen_ovarianStroma
FCA_GND8047885_AACTCTTCAAGCGCTC	2384	FCA_GND8047885	F81	female	CD45-	0.00228571	5250	0.0819672	0.0410827	1	8.8	N	1	Supporting	Supp_preGC_IIb
FCA_GND8047885_AACTCTTCACCGAAAG	2266	FCA_GND8047885	F81	female	CD45-	0.0682161	4647	0.117446	0.0777385	1	8.8	N	1	Supporting	Supp_preGC_I
FCA_GND8047885_AACTCTTCACGGACAA	2484	FCA_GND8047885	F81	female	CD45-	0.0139707	5941	0.101871	0.07	1	8.8	N	1	Supporting	Supp_preGC_IIb
FCA_GND8047885_AACTCTTCAGTTTACG	2982	FCA_GND8047885	F81	female	CD45-	0.0110858	7036	0.0568862	0.104762	1	8.8	N	1	Supporting	Supp_preGC_IIb
FCA_GND8047885_AACTCTTGTCTGGAGA	1420	FCA_GND8047885	F81	female	CD45-	0.0896638	2409	0.0526316	0.0888252	1	8.8	N	1	Supporting	Supp_preGC_I
FCA_GND8047885_AACTCTTGTGGCGAAT	2204	FCA_GND8047885	F81	female	CD45-	0.065973	4229	0.128329	0.0664506	1	8.8	N	1	Supporting	Supp_sLGR5_female
FCA_GND8047885_AACTCTTGTTCTGGTA	2115	FCA_GND8047885	F81	female	CD45-	0.0436212	4562	0.0819672	0.0888252	1	8.8	N	1	Supporting	Supp_preGC_I
FCA_GND8047885_AACTCTTTCATGCTCC	1763	FCA_GND8047885	F81	female	CD45-	0.0125622	4219	0.0647482	0.0682005	1	8.8	N	1	Supporting	Supp_preGC_IIa
FCA_GND8047885_AACTGGTAGAATGTTG	2093	FCA_GND8047885	F81	female	CD45-	0.0269515	6085	0.0512821	0.0737564	1	8.8	N	1	Supporting	Supp_preGC_IIa
FCA_GND8047885_AACTGGTAGCGTGAAC	1402	FCA_GND8047885	F81	female	CD45-	0.0217975	2982	0.0241546	0.0272981	1	8.8	N	0	Mesenchymal_GATA2_NR2F1	Mesen_dorsalMesentery
FCA_GND8047885_AACTGGTAGCGTGAGT	2276	FCA_GND8047885	F81	female	CD45-	0.0718982	4715	0.0798206	0.0664506	1	8.8	N	1	Supporting	Supp_sLGR5_female
FCA_GND8047885_AACTGGTAGGATGGAA	2365	FCA_GND8047885	F81	female	CD45-	0.0264115	6323	0.0841813	0.107759	1	8.8	N	1	Supporting	Supp_preGC_IIa
FCA_GND8047885_AACTGGTAGGGCATGT	1914	FCA_GND8047885	F81	female	CD45-	0.0388481	3681	0.183099	0.15983	1	8.8	N	1	Supporting	Supp_preGC_I
FCA_GND8047885_AACTGGTAGTCTCAAC	1466	FCA_GND8047885	F81	female	CD45-	0.0602094	2292	0.0798206	0.0798206	1	8.8	N	1	Supporting	Supp_preGC_I
FCA_GND8047885_AACTGGTCAATCCGAT	1910	FCA_GND8047885	F81	female	CD45-	0.0717894	3761	0.140645	0.112481	1	8.8	N	1	Supporting	Supp_preGC_I
FCA_GND8047885_AACTGGTCACAGACAG	2358	FCA_GND8047885	F81	female	CD45-	0.0246721	6404	0.0718512	0.104762	1	8.8	N	1	Supporting	Supp_preGC_IIa
FCA_GND8047885_AACTGGTCACTAGTAC	2402	FCA_GND8047885	F81	female	CD45-	0.094493	4921	0.0819672	0.0664506	1	8.8	N	1	Supporting	Supp_sLGR5_female
FCA_GND8047885_AACTGGTCACTGTGTA	2398	FCA_GND8047885	F81	female	CD45-	0.0560949	4635	0.165217	0.0841813	1	8.8	N	1	Supporting	Supp_preGC_I
FCA_GND8047885_AACTGGTCAGTAGAGC	2080	FCA_GND8047885	F81	female	CD45-	0.0301039	4717	0.15983	0.0963855	1	8.8	N	13	Neural	Neural
FCA_GND8047885_AACTGGTCATTACCTT	2944	FCA_GND8047885	F81	female	CD45-	0.0528934	6031	0.0864662	0.0900437	1	8.8	N	1	Supporting	Supp_preGC_IIc
FCA_GND8047885_AACTGGTTCACTCTTA	2919	FCA_GND8047885	F81	female	CD45-	0.00574309	8532	0.0583776	0.075718	1	8.8	N	0	Mesenchymal_GATA2_NR2F1	Mesenchymal_GATA2_NR2F1
FCA_GND8047885_AACTGGTTCATTGCGA	3238	FCA_GND8047885	F81	female	CD45-	0.0583979	7740	0.22905	0.238462	0.826584	8.8	N	1	Supporting	Supp_preGC_I
FCA_GND8047885_AACTGGTTCGCACTCT	2738	FCA_GND8047885	F81	female	CD45-	0.0641589	5689	0.0461957	0.0841813	1	8.8	N	1	Supporting	Supp_preGC_I
FCA_GND8047885_AACTGGTTCGGAAACG	1292	FCA_GND8047885	F81	female	CD45-	0.022736	2595	0.0159652	0.0130112	1	8.8	N	0	Mesenchymal_GATA2_NR2F1	Mesenchymal_GATA2_NR2F1
FCA_GND8047885_AACTTTCAGGTGCTTT	3215	FCA_GND8047885	F81	female	CD45-	0.0353728	7322	0.196694	0.0900437	1	8.8	N	1	Supporting	Supp_preGC_IIc
FCA_GND8047885_AACTTTCAGTGTCCCG	2760	FCA_GND8047885	F81	female	CD45-	0.0785494	7142	0.0990807	0.0664506	1	8.8	N	1	Supporting	Supp_sLGR5_female
FCA_GND8047885_AACTTTCCACTATCTT	3509	FCA_GND8047885	F81	female	CD45-	0.0321115	9903	0.564516	0.0912621	1	8.8	N	9	PV	PV
FCA_GND8047885_AACTTTCCAGACAAAT	3320	FCA_GND8047885	F81	female	CD45-	0.00717518	9059	0.101871	0.07	1	8.8	N	1	Supporting	Supp_preGC_IIb
FCA_GND8047885_AACTTTCGTATCGCAT	1875	FCA_GND8047885	F81	female	CD45-	0.0687343	3579	0.165217	0.104762	1	8.8	N	1	Supporting	Supp_preGC_I
FCA_GND8047885_AACTTTCGTCAATACC	2325	FCA_GND8047885	F81	female	CD45-	0.0366293	4723	0.128329	0.211909	1	8.8	N	1	Supporting	Supp_preGC_IIc
FCA_GND8047885_AACTTTCGTCTCATCC	1558	FCA_GND8047885	F81	female	CD45-	0.10266	2932	0.0449966	0.110867	1	8.8	N	1	Supporting	Supp_preGC_I
FCA_GND8047885_AACTTTCGTTCAGACT	2935	FCA_GND8047885	F81	female	CD45-	0.0335443	7900	0.0937808	0.114094	1	8.8	N	1	Supporting	Supp_preGC_IIc
FCA_GND8047885_AACTTTCGTTGGACCC	1705	FCA_GND8047885	F81	female	CD45-	0.0263459	3492	0.22905	0.147458	1	8.8	N	1	Supporting	Supp_sKITLG
FCA_GND8047885_AACTTTCTCACCGTAA	2485	FCA_GND8047885	F81	female	CD45-	0.0767997	5612	0.0990807	0.109313	1	8.8	N	1	Supporting	Supp_sLGR5_female
FCA_GND8047885_AACTTTCTCCGATATG	2209	FCA_GND8047885	F81	female	CD45-	0.042394	4411	0.0888252	0.0777385	1	8.8	N	1	Supporting	Supp_preGC_I
FCA_GND8047885_AACTTTCTCCGTACAA	1978	FCA_GND8047885	F81	female	CD45-	0.0968593	3789	0.0281215	0.0664506	1	8.8	N	1	Supporting	Supp_sLGR5_female
FCA_GND8047885_AACTTTCTCGCATGGC	2077	FCA_GND8047885	F81	female	CD45-	0.0636912	4145	0.124555	0.104762	1	8.8	N	1	Supporting	Supp_preGC_I
FCA_GND8047885_AACTTTCTCGCCAAAT	2365	FCA_GND8047885	F81	female	CD45-	0.00979506	6636	0.0486787	0.0614786	1	8.8	N	1	Supporting	Supp_preGC_IIa
FCA_GND8047885_AACTTTCTCTGTTGAG	1522	FCA_GND8047885	F81	female	CD45-	0.0153619	3385	0.0937808	0.0798206	1	8.8	N	1	Supporting	Supp_preGC_IIa
FCA_GND8047885_AAGACCTAGAACTCGG	2967	FCA_GND8047885	F81	female	CD45-	0.0127532	7998	0.128329	0.0718512	1	8.8	N	1	Supporting	Supp_preGC_IIa
FCA_GND8047885_AAGACCTAGATGCCTT	2727	FCA_GND8047885	F81	female	CD45-	0.0526081	6729	0.0864662	0.075718	1	8.8	N	1	Supporting	Supp_preGC_I
FCA_GND8047885_AAGACCTAGCAGCGTA	2011	FCA_GND8047885	F81	female	CD45-	0.0261368	5586	0.0737564	0.075718	1	8.8	N	0	Mesenchymal_GATA2_NR2F1	Mesenchymal_GATA2_NR2F1
FCA_GND8047885_AAGACCTAGTGAAGAG	1725	FCA_GND8047885	F81	female	CD45-	0.0594752	3430	0.183099	0.0841813	1	8.8	N	1	Supporting	Supp_sLGR5_female
FCA_GND8047885_AAGACCTCAAACTGCT	2027	FCA_GND8047885	F81	female	CD45-	0.0350341	4253	0.0647482	0.0888252	1	8.8	N	1	Supporting	Supp_preGC_I
FCA_GND8047885_AAGACCTCAATGTAAG	2298	FCA_GND8047885	F81	female	CD45-	0.0139951	5359	0.149798	0.0937808	1	8.8	N	1	Supporting	Supp_preGC_IIb
FCA_GND8047885_AAGACCTCAGATGGGT	2188	FCA_GND8047885	F81	female	CD45-	0.0180451	5985	0.0798206	0.0937808	1	8.8	N	0	Mesenchymal_GATA2_NR2F1	Mesenchymal_GATA2_NR2F1
FCA_GND8047885_AAGACCTCAGTATAAG	3446	FCA_GND8047885	F81	female	CD45-	0.0136019	13454	0.220217	0.220217	1	8.8	N	6	Germ cells	Germcells_PGC_mitotic
FCA_GND8047885_AAGACCTCAGTCAGAG	2436	FCA_GND8047885	F81	female	CD45-	0.0274904	6766	0.0599078	0.0777385	1	8.8	N	5	Coel Epi	Supp_ovarianSurf
FCA_GND8047885_AAGACCTCATAAAGGT	2281	FCA_GND8047885	F81	female	CD45-	0.0829084	4511	0.149798	0.11577	1	8.8	N	1	Supporting	Supp_sLGR5_female
FCA_GND8047885_AAGACCTCATCCGGGT	2580	FCA_GND8047885	F81	female	CD45-	0.0250833	6299	0.075718	0.075718	1	8.8	N	1	Supporting	Supp_preGC_IIa
FCA_GND8047885_AAGACCTCATCGATTG	2584	FCA_GND8047885	F81	female	CD45-	0.063857	5481	0.0630915	0.147458	1	8.8	N	1	Supporting	Supp_preGC_IIc
FCA_GND8047885_AAGACCTCATGAGCGA	2475	FCA_GND8047885	F81	female	CD45-	0.0232861	6141	0.136364	0.110867	1	8.8	N	1	Supporting	Supp_preGC_IIb
FCA_GND8047885_AAGACCTCATGCCACG	1494	FCA_GND8047885	F81	female	CD45-	0.166667	2796	0.0324867	0.0798206	1	8.8	N	1	Supporting	Supp_preGC_I
FCA_GND8047885_AAGACCTGTCCTGCTT	2276	FCA_GND8047885	F81	female	CD45-	0.0562322	4926	0.0990807	0.0888252	1	8.8	N	1	Supporting	Supp_preGC_I
FCA_GND8047885_AAGACCTGTGTTGGGA	2434	FCA_GND8047885	F81	female	CD45-	0.0827802	5424	0.0990807	0.211909	1	8.8	N	1	Supporting	Supp_preGC_I
FCA_GND8047885_AAGACCTGTTGCGTTA	2135	FCA_GND8047885	F81	female	CD45-	0.0355163	5772	0.075718	0.0606932	1	8.8	N	5	Coel Epi	Supp_ovarianSurf
FCA_GND8047885_AAGACCTTCATGCAAC	2556	FCA_GND8047885	F81	female	CD45-	0.0137581	5524	0.165217	0.104762	1	8.8	N	1	Supporting	Supp_preGC_IIb
FCA_GND8047885_AAGACCTTCCCTTGTG	1746	FCA_GND8047885	F81	female	CD45-	0.036602	3661	0.15983	0.104762	1	8.8	N	1	Supporting	Supp_preGC_I
FCA_GND8047885_AAGACCTTCCGCTGTT	2320	FCA_GND8047885	F81	female	CD45-	0.0643985	4938	0.0963855	0.101871	1	8.8	N	1	Supporting	Supp_preGC_I
FCA_GND8047885_AAGACCTTCGGAGCAA	2214	FCA_GND8047885	F81	female	CD45-	0.0486233	5121	0.140645	0.107759	1	8.8	N	1	Supporting	Supp_preGC_IIa
FCA_GND8047885_AAGACCTTCTGAAAGA	2319	FCA_GND8047885	F81	female	CD45-	0.0714894	4700	0.132262	0.11577	1	8.8	N	1	Supporting	Supp_preGC_I
FCA_GND8047885_AAGACCTTCTGTCCGT	2558	FCA_GND8047885	F81	female	CD45-	0.0620382	5819	0.145119	0.211909	1	8.8	N	1	Supporting	Supp_preGC_IIc
FCA_GND8047885_AAGCCGCAGATCCCGC	2460	FCA_GND8047885	F81	female	CD45-	0.0613104	4991	0.12093	0.0777385	1	8.8	N	1	Supporting	Supp_preGC_I
FCA_GND8047885_AAGCCGCAGCCAGTAG	3609	FCA_GND8047885	F81	female	CD45-	0.0213736	11182	0.0647482	0.110867	1	8.8	N	1	Supporting	Supp_preGC_IIb
FCA_GND8047885_AAGCCGCCAATCAGAA	2370	FCA_GND8047885	F81	female	CD45-	0.0148678	6995	0.0647482	0.075718	1	8.8	N	0	Mesenchymal_GATA2_NR2F1	Mesenchymal_GATA2_NR2F1
FCA_GND8047885_AAGCCGCCACAAGACG	2221	FCA_GND8047885	F81	female	CD45-	0.0264191	5602	0.136364	0.0682005	1	8.8	N	1	Supporting	Supp_preGC_IIa
FCA_GND8047885_AAGCCGCCAGCGATCC	1312	FCA_GND8047885	F81	female	CD45-	0.0194684	2671	0.0963855	0.0682005	1	8.8	N	1	Supporting	Supp_preGC_IIa
FCA_GND8047885_AAGCCGCCAGTACACT	2394	FCA_GND8047885	F81	female	CD45-	0.0317523	7653	0.0306891	0.0526316	1	8.8	N	2	Mesenchymal_LHX9_ARX	Mesen_ovarianStroma
FCA_GND8047885_AAGCCGCCAGTCGTGC	2295	FCA_GND8047885	F81	female	CD45-	0.0294167	5915	0.0888252	0.0963855	1	8.8	N	1	Supporting	Supp_preGC_IIb
FCA_GND8047885_AAGCCGCCATGTTGAC	2545	FCA_GND8047885	F81	female	CD45-	0.0674206	6986	0.136364	0.075718	1	8.8	N	1	Supporting	Supp_preGC_IIa
FCA_GND8047885_AAGCCGCCATTCACTT	2212	FCA_GND8047885	F81	female	CD45-	0.0367467	6123	0.0334129	0.0647482	1	8.8	N	5	Coel Epi	Supp_coelEpi
FCA_GND8047885_AAGCCGCGTAGTACCT	1891	FCA_GND8047885	F81	female	CD45-	0.0388623	3551	0.0526316	0.15983	1	8.8	N	1	Supporting	Supp_preGC_I
FCA_GND8047885_AAGCCGCGTATCAGTC	1855	FCA_GND8047885	F81	female	CD45-	0.0670391	3222	0.0383407	0.140645	1	8.8	N	1	Supporting	Supp_preGC_I
FCA_GND8047885_AAGCCGCGTGTTAAGA	1811	FCA_GND8047885	F81	female	CD45-	0.0223005	4260	0.0449966	0.0554324	1	8.8	N	0	Mesenchymal_GATA2_NR2F1	Mesen_dorsalMesentery
FCA_GND8047885_AAGCCGCGTTGTCTTT	1673	FCA_GND8047885	F81	female	CD45-	0.0919465	3067	0.0499648	0.109313	1	8.8	N	1	Supporting	Supp_sLGR5_female
FCA_GND8047885_AAGCCGCTCGCCCTTA	2257	FCA_GND8047885	F81	female	CD45-	0.0178117	5502	0.0393901	0.0614786	1	8.8	N	1	Supporting	Supp_preGC_IIa
FCA_GND8047885_AAGCCGCTCGGCCGAT	2715	FCA_GND8047885	F81	female	CD45-	0.0849421	5698	0.0963855	0.11577	1	8.8	N	1	Supporting	Supp_preGC_I
FCA_GND8047885_AAGCCGCTCGGCGGTT	3523	FCA_GND8047885	F81	female	CD45-	0.0482615	9117	0.22905	0.112481	1	8.8	N	1	Supporting	Supp_preGC_I
FCA_GND8047885_AAGCCGCTCTAACTTC	2080	FCA_GND8047885	F81	female	CD45-	0.032	5875	0.0990807	0.07	1	8.8	N	2	Mesenchymal_LHX9_ARX	Mesen_ovarianStroma
FCA_GND8047885_AAGCCGCTCTTGTACT	2453	FCA_GND8047885	F81	female	CD45-	0.0151561	6598	0.0990807	0.104762	1	8.8	N	1	Supporting	Supp_preGC_IIa
FCA_GND8047885_AAGGAGCAGAATTGTG	1227	FCA_GND8047885	F81	female	CD45-	0.0394422	2510	0.0737564	0.0526316	1	8.8	N	2	Mesenchymal_LHX9_ARX	Mesen_testisStroma
FCA_GND8047885_AAGGAGCAGACAGAGA	1861	FCA_GND8047885	F81	female	CD45-	0.028417	4997	0.0512821	0.0526316	1	8.8	N	2	Mesenchymal_LHX9_ARX	Mesen_ovarianStroma
FCA_GND8047885_AAGGAGCAGCATGGCA	1831	FCA_GND8047885	F81	female	CD45-	0.0538284	3474	0.0990807	0.140645	1	8.8	N	1	Supporting	Supp_preGC_I
FCA_GND8047885_AAGGAGCAGGCTAGGT	1273	FCA_GND8047885	F81	female	CD45-	0.0451031	2328	0.0449966	0.0599078	1	8.8	N	1	Supporting	Supp_preGC_I
FCA_GND8047885_AAGGAGCAGTCTCCTC	1420	FCA_GND8047885	F81	female	CD45-	0.0484503	2807	0.0306891	0.0599078	1	8.8	N	1	Supporting	Supp_preGC_I
FCA_GND8047885_AAGGAGCAGTCTTGCA	933	FCA_GND8047885	F81	female	CD45-	0.0317259	1576	0.0178571	0.0554324	1	8.8	N	0	Mesenchymal_GATA2_NR2F1	Mesenchymal_GATA2_NR2F1
FCA_GND8047885_AAGGAGCAGTGCCATT	1801	FCA_GND8047885	F81	female	CD45-	0.0689655	3596	0.165217	0.0798206	1	8.8	N	1	Supporting	Supp_preGC_I
FCA_GND8047885_AAGGAGCCAAGGTGTG	2329	FCA_GND8047885	F81	female	CD45-	0.0650318	5505	0.211909	0.147458	1	8.8	N	1	Supporting	Supp_preGC_I
FCA_GND8047885_AAGGAGCCAATGGATA	1628	FCA_GND8047885	F81	female	CD45-	0.0440864	3289	0.0474227	0.0599078	1	8.8	N	1	Supporting	Supp_preGC_I
FCA_GND8047885_AAGGAGCCACAGACTT	1936	FCA_GND8047885	F81	female	CD45-	0.0229649	4877	0.0568862	0.104762	1	8.8	N	1	Supporting	Supp_preGC_IIb
FCA_GND8047885_AAGGAGCCATTCTCAT	2192	FCA_GND8047885	F81	female	CD45-	0.0588716	4892	0.0864662	0.119188	1	8.8	N	1	Supporting	Supp_preGC_IIa
FCA_GND8047885_AAGGAGCGTAAACGCG	2250	FCA_GND8047885	F81	female	CD45-	0.0624671	5699	0.12093	0.114094	1	8.8	N	1	Supporting	Supp_preGC_IIa
FCA_GND8047885_AAGGAGCTCATGCATG	1934	FCA_GND8047885	F81	female	CD45-	0.0337853	4499	0.0798206	0.0888252	1	8.8	N	1	Supporting	Supp_preGC_I
FCA_GND8047885_AAGGAGCTCGATGAGG	362	FCA_GND8047885	F81	female	CD45-	0.014476	1727	0.0647482	0.07	1	8.8	N	10	Erythroid	Erythroid
FCA_GND8047885_AAGGAGCTCGGATGTT	1570	FCA_GND8047885	F81	female	CD45-	0.023171	3841	0.0249187	0.0737564	1	8.8	N	0	Mesenchymal_GATA2_NR2F1	Mesenchymal_GATA2_NR2F1
FCA_GND8047885_AAGGAGCTCGGCGCAT	1696	FCA_GND8047885	F81	female	CD45-	0.0238577	4946	0.0438247	0.07	1	8.8	N	2	Mesenchymal_LHX9_ARX	Mesen_ovarianStroma
FCA_GND8047885_AAGGAGCTCTCACATT	1664	FCA_GND8047885	F81	female	CD45-	0.0166338	3547	0.110867	0.123615	1	8.8	N	7	Endothelial	Endothelial
FCA_GND8047885_AAGGCAGAGACTAGGC	2103	FCA_GND8047885	F81	female	CD45-	0.0249013	5823	0.0777385	0.0718512	1	8.8	N	2	Mesenchymal_LHX9_ARX	Mesen_ovarianStroma
FCA_GND8047885_AAGGCAGAGAGCTGGT	1815	FCA_GND8047885	F81	female	CD45-	0.0158172	4552	0.0249187	0.0404624	1	8.8	N	0	Mesenchymal_GATA2_NR2F1	Mesen_dorsalMesentery
FCA_GND8047885_AAGGCAGAGGCCCTTG	2231	FCA_GND8047885	F81	female	CD45-	0.00633828	5522	0.0841813	0.0474372	1	8.8	N	1	Supporting	Supp_preGC_IIb
FCA_GND8047885_AAGGCAGAGTGCGTGA	1107	FCA_GND8047885	F81	female	CD45-	0.0615468	1836	0.12093	0.0599078	1	8.8	N	1	Supporting	Supp_preGC_I
FCA_GND8047885_AAGGCAGCAGAAGCAC	1987	FCA_GND8047885	F81	female	CD45-	0.0135747	4641	0.0526316	0.110867	1	8.8	N	1	Supporting	Supp_preGC_IIb
FCA_GND8047885_AAGGCAGCAGATGGCA	2324	FCA_GND8047885	F81	female	CD45-	0.00670803	5963	0.124555	0.0474372	1	8.8	N	1	Supporting	Supp_preGC_IIb
FCA_GND8047885_AAGGCAGCATACTCTT	1498	FCA_GND8047885	F81	female	CD45-	0.0282879	4737	0.0205339	0.0547235	1	8.8	N	2	Mesenchymal_LHX9_ARX	Mesen_testisStroma
FCA_GND8047885_AAGGCAGCATGGTAGG	1703	FCA_GND8047885	F81	female	CD45-	0.0446061	3161	0.0841813	0.12093	1	8.8	N	1	Supporting	Supp_preGC_I
FCA_GND8047885_AAGGCAGGTAAATGTG	1728	FCA_GND8047885	F81	female	CD45-	0.0717089	2803	0.0415584	0.104762	1	8.8	N	1	Supporting	Supp_preGC_I
FCA_GND8047885_AAGGCAGGTACATGTC	2193	FCA_GND8047885	F81	female	CD45-	0.0604119	4370	0.0664506	0.140645	1	8.8	N	1	Supporting	Supp_preGC_I
FCA_GND8047885_AAGGCAGGTATGAATG	1886	FCA_GND8047885	F81	female	CD45-	0.0622933	3628	0.114094	0.0798206	1	8.8	N	1	Supporting	Supp_preGC_I
FCA_GND8047885_AAGGCAGGTATTAGCC	2200	FCA_GND8047885	F81	female	CD45-	0.0473149	4227	0.0990807	0.12093	1	8.8	N	1	Supporting	Supp_preGC_I
FCA_GND8047885_AAGGCAGGTCCCTTGT	1602	FCA_GND8047885	F81	female	CD45-	0.0912742	2739	0.0963855	0.126442	1	8.8	N	1	Supporting	Supp_preGC_I
FCA_GND8047885_AAGGCAGGTTCCATGA	2054	FCA_GND8047885	F81	female	CD45-	0.0360704	4713	0.248509	0.110867	1	8.8	N	1	Supporting	Supp_preGC_IIb
FCA_GND8047885_AAGGCAGGTTTGTGTG	2203	FCA_GND8047885	F81	female	CD45-	0.0535832	4535	0.0990807	0.0664506	1	8.8	N	1	Supporting	Supp_sLGR5_female
FCA_GND8047885_AAGGCAGTCCGCATAA	2390	FCA_GND8047885	F81	female	CD45-	0.0188979	6932	0.075718	0.104762	1	8.8	N	1	Supporting	Supp_preGC_IIb
FCA_GND8047885_AAGGCAGTCCGTAGTA	2677	FCA_GND8047885	F81	female	CD45-	0.0621324	6631	0.107759	0.075718	1	8.8	N	1	Supporting	Supp_preGC_I
FCA_GND8047885_AAGGCAGTCTCAAGTG	1971	FCA_GND8047885	F81	female	CD45-	0.0474853	3917	0.117446	0.140645	1	8.8	N	1	Supporting	Supp_sKITLG
FCA_GND8047885_AAGGTTCAGAGTAATC	2113	FCA_GND8047885	F81	female	CD45-	0.0287645	5771	0.0963855	0.165217	1	8.8	N	7	Endothelial	Endothelial
FCA_GND8047885_AAGGTTCAGATGGCGT	2574	FCA_GND8047885	F81	female	CD45-	0.076462	6173	0.12093	0.101871	1	8.8	N	1	Supporting	Supp_preGC_I
FCA_GND8047885_AAGGTTCAGCAATCTC	1623	FCA_GND8047885	F81	female	CD45-	0.0477837	3181	0.0118939	0.0181832	1	8.8	N	0	Mesenchymal_GATA2_NR2F1	Mesen_dorsalMesentery
FCA_GND8047885_AAGGTTCAGGATGTAT	2653	FCA_GND8047885	F81	female	CD45-	0.0357981	6816	0.238462	0.0888252	1	8.8	N	1	Supporting	Supp_sKITLG
FCA_GND8047885_AAGGTTCAGGTGACCA	2756	FCA_GND8047885	F81	female	CD45-	0.0308461	8202	0.362398	0.117446	1	8.8	N	7	Endothelial	Endothelial
FCA_GND8047885_AAGGTTCAGTCATCCA	1441	FCA_GND8047885	F81	female	CD45-	0.0329427	3157	0.0185093	0.0181832	1	8.8	N	0	Mesenchymal_GATA2_NR2F1	Mesenchymal_GATA2_NR2F1
FCA_GND8047885_AAGGTTCAGTGAAGTT	2121	FCA_GND8047885	F81	female	CD45-	0.0500255	3918	0.117446	0.15983	1	8.8	N	1	Supporting	Supp_preGC_I
FCA_GND8047885_AAGGTTCAGTTAAGTG	3821	FCA_GND8047885	F81	female	CD45-	0.0176545	15860	0.211909	0.220217	1	8.8	N	6	Germ cells	Germcells_PGC_mitotic
FCA_GND8047885_AAGGTTCAGTTGAGAT	1683	FCA_GND8047885	F81	female	CD45-	0.0606796	3296	0.110867	0.140645	1	8.8	N	1	Supporting	Supp_preGC_I
FCA_GND8047885_AAGGTTCCACCATGTA	1714	FCA_GND8047885	F81	female	CD45-	0.0567647	3400	0.176829	0.140645	1	8.8	N	1	Supporting	Supp_preGC_I
FCA_GND8047885_AAGGTTCCATGGTTGT	2013	FCA_GND8047885	F81	female	CD45-	0.0159224	5464	0.107759	0.075718	1	8.8	N	9	PV	PV
FCA_GND8047885_AAGGTTCCATGTCTCC	1028	FCA_GND8047885	F81	female	CD45-	0.0260465	2150	0.0219436	0.034358	1	8.8	N	0	Mesenchymal_GATA2_NR2F1	Mesen_dorsalMesentery
FCA_GND8047885_AAGGTTCGTACCGCTG	2847	FCA_GND8047885	F81	female	CD45-	0.0633616	7544	0.101871	0.101871	1	8.8	N	1	Supporting	Supp_preGC_I
FCA_GND8047885_AAGGTTCGTCGACTGC	1993	FCA_GND8047885	F81	female	CD45-	0.00723888	5802	0.0438247	0.0614786	1	8.8	N	1	Supporting	Supp_preGC_IIa
FCA_GND8047885_AAGGTTCGTCTAGGTT	1940	FCA_GND8047885	F81	female	CD45-	0.034398	4884	0.0404624	0.0718512	1	8.8	N	2	Mesenchymal_LHX9_ARX	Mesen_ovarianStroma
FCA_GND8047885_AAGGTTCGTCTAGTCA	2921	FCA_GND8047885	F81	female	CD45-	0.0423878	7974	0.128329	0.075718	1	8.8	N	1	Supporting	Supp_preGC_I
FCA_GND8047885_AAGGTTCGTTACCGAT	2447	FCA_GND8047885	F81	female	CD45-	0.0651459	5173	0.0864662	0.0841813	1	8.8	N	1	Supporting	Supp_preGC_I
FCA_GND8047885_AAGGTTCTCAGTGTTG	1481	FCA_GND8047885	F81	female	CD45-	0.0391975	3240	0.104762	0.0737564	1	8.8	N	2	Mesenchymal_LHX9_ARX	Mesen_testisStroma
FCA_GND8047885_AAGGTTCTCCCAACGG	1408	FCA_GND8047885	F81	female	CD45-	0.0316607	3348	0.0737564	0.0606932	1	8.8	N	2	Mesenchymal_LHX9_ARX	Mesen_ovarianStroma
FCA_GND8047885_AAGGTTCTCCTTTCGG	2054	FCA_GND8047885	F81	female	CD45-	0.0183396	5071	0.0554324	0.0614786	1	8.8	N	1	Supporting	Supp_preGC_IIa
FCA_GND8047885_AAGGTTCTCGTTTATC	1604	FCA_GND8047885	F81	female	CD45-	0.0601764	3174	0.0449966	0.0664506	1	8.8	N	1	Supporting	Supp_sLGR5_female
FCA_GND8047885_AAGTCTGAGACGCACA	1891	FCA_GND8047885	F81	female	CD45-	0.0164156	4447	0.0474227	0.0554324	1	8.8	N	2	Mesenchymal_LHX9_ARX	Mesen_dorsalMesentery
FCA_GND8047885_AAGTCTGAGCGATAGC	2125	FCA_GND8047885	F81	female	CD45-	0.0625158	3967	0.132262	0.109313	1	8.8	N	1	Supporting	Supp_preGC_I
FCA_GND8047885_AAGTCTGAGGACGAAA	2245	FCA_GND8047885	F81	female	CD45-	0.0170555	6215	0.0554324	0.0614786	1	8.8	N	1	Supporting	Supp_preGC_IIa
FCA_GND8047885_AAGTCTGAGGATGGAA	2076	FCA_GND8047885	F81	female	CD45-	0.0785629	4175	0.15983	0.104762	1	8.8	N	1	Supporting	Supp_preGC_I
FCA_GND8047885_AAGTCTGAGTGGACGT	2546	FCA_GND8047885	F81	female	CD45-	0.00287792	6602	0.0486787	0.0474372	1	8.8	N	1	Supporting	Supp_preGC_IIb
FCA_GND8047885_AAGTCTGAGTGGCACA	2123	FCA_GND8047885	F81	female	CD45-	0.0776942	4389	0.124555	0.0888252	1	8.8	N	1	Supporting	Supp_preGC_I
FCA_GND8047885_AAGTCTGCAAAGCAAT	2259	FCA_GND8047885	F81	female	CD45-	0.0542875	4863	0.0614786	0.0841813	1	8.8	N	1	Supporting	Supp_preGC_I
FCA_GND8047885_AAGTCTGCACTGTTAG	2165	FCA_GND8047885	F81	female	CD45-	0.0659886	4228	0.110867	0.0664506	1	8.8	N	1	Supporting	Supp_sLGR5_female
FCA_GND8047885_AAGTCTGGTAAAGGAG	1793	FCA_GND8047885	F81	female	CD45-	0.0305831	4545	0.0568862	0.0682005	1	8.8	N	1	Supporting	Supp_preGC_IIa
FCA_GND8047885_AAGTCTGGTAACGACG	2758	FCA_GND8047885	F81	female	CD45-	0.0625418	5980	0.149798	0.12093	1	8.8	N	1	Supporting	Supp_preGC_I
FCA_GND8047885_AAGTCTGGTATAGTAG	2513	FCA_GND8047885	F81	female	CD45-	0.0250145	6876	0.0499648	0.0512821	1	8.8	N	5	Coel Epi	Supp_ovarianSurf
FCA_GND8047885_AAGTCTGGTCCATCCT	2374	FCA_GND8047885	F81	female	CD45-	0.0865423	5038	0.07	0.110867	1	8.8	N	1	Supporting	Supp_preGC_I
FCA_GND8047885_AAGTCTGGTCGGCTCA	1834	FCA_GND8047885	F81	female	CD45-	0.0709261	3412	0.107759	0.109313	1	8.8	N	1	Supporting	Supp_sLGR5_female
FCA_GND8047885_AAGTCTGTCCGCTGTT	2199	FCA_GND8047885	F81	female	CD45-	0.053021	4866	0.107759	0.0937808	1	8.8	N	1	Supporting	Supp_sLGR5_female
FCA_GND8047885_AAGTCTGTCGCGGATC	1507	FCA_GND8047885	F81	female	CD45-	0.0217918	3717	0.0664506	0.0737564	1	8.8	N	2	Mesenchymal_LHX9_ARX	Mesen_ovarianStroma
FCA_GND8047885_AAGTCTGTCTGCCCTA	2999	FCA_GND8047885	F81	female	CD45-	0.073472	7690	0.0449966	0.0900437	1	8.8	N	1	Supporting	Supp_preGC_I
FCA_GND8047885_AAGTCTGTCTGGTATG	2535	FCA_GND8047885	F81	female	CD45-	0.0686743	5446	0.110867	0.12093	1	8.8	N	1	Supporting	Supp_preGC_I
FCA_GND8047885_AAGTCTGTCTGTCAAG	1913	FCA_GND8047885	F81	female	CD45-	0.0634497	3751	0.075718	0.12093	1	8.8	N	1	Supporting	Supp_preGC_I
FCA_GND8047885_AATCCAGAGCACGCCT	2521	FCA_GND8047885	F81	female	CD45-	0.0142832	5741	0.0499648	0.110867	1	8.8	N	1	Supporting	Supp_preGC_IIb
FCA_GND8047885_AATCCAGAGGCATGGT	2726	FCA_GND8047885	F81	female	CD45-	0.0277154	6675	0.183099	0.114094	1	8.8	N	1	Supporting	Supp_preGC_IIb
FCA_GND8047885_AATCCAGCAACAACCT	2299	FCA_GND8047885	F81	female	CD45-	0.033504	6835	0.07	0.075718	1	8.8	N	2	Mesenchymal_LHX9_ARX	Mesen_ovarianStroma
FCA_GND8047885_AATCCAGCACCCATTC	3111	FCA_GND8047885	F81	female	CD45-	0.0723896	8399	0.0540146	0.075718	1	8.8	N	1	Supporting	Supp_preGC_I
FCA_GND8047885_AATCCAGCACGGTTTA	2638	FCA_GND8047885	F81	female	CD45-	0.0564071	6524	0.0963855	0.0664506	1	8.8	N	1	Supporting	Supp_sLGR5_female
FCA_GND8047885_AATCCAGCAGTCAGAG	2671	FCA_GND8047885	F81	female	CD45-	0.0228661	6385	0.183099	0.147458	1	8.8	N	1	Supporting	Supp_preGC_I
FCA_GND8047885_AATCCAGCATCGGGTC	2327	FCA_GND8047885	F81	female	CD45-	0.00361011	6371	0.0289608	0.0474372	1	8.8	N	1	Supporting	Supp_preGC_IIa
FCA_GND8047885_AATCCAGCATTTGCCC	1976	FCA_GND8047885	F81	female	CD45-	0.0241138	4852	0.128329	0.109313	1	8.8	N	1	Supporting	Supp_preGC_IIa
FCA_GND8047885_AATCCAGGTAAGAGGA	2223	FCA_GND8047885	F81	female	CD45-	0.0879069	4209	0.101871	0.109313	1	8.8	N	1	Supporting	Supp_sLGR5_female
FCA_GND8047885_AATCCAGGTAATCACC	1941	FCA_GND8047885	F81	female	CD45-	0.0254902	4590	0.07	0.0554324	1	8.8	N	0	Mesenchymal_GATA2_NR2F1	Mesen_dorsalMesentery
FCA_GND8047885_AATCCAGGTAGCGTGA	2170	FCA_GND8047885	F81	female	CD45-	0.0638345	4496	0.0990807	0.0664506	1	8.8	N	1	Supporting	Supp_sLGR5_female
FCA_GND8047885_AATCCAGGTCGTCTTC	1939	FCA_GND8047885	F81	female	CD45-	0.0282004	4929	0.0841813	0.107759	1	8.8	N	1	Supporting	Supp_preGC_IIa
FCA_GND8047885_AATCCAGGTGTTAAGA	2161	FCA_GND8047885	F81	female	CD45-	0.0541565	4487	0.15983	0.101871	1	8.8	N	1	Supporting	Supp_preGC_I
FCA_GND8047885_AATCCAGGTTAAGTAG	1807	FCA_GND8047885	F81	female	CD45-	0.0613318	3424	0.136364	0.0798206	1	8.8	N	1	Supporting	Supp_preGC_I
FCA_GND8047885_AATCCAGGTTGACGTT	1813	FCA_GND8047885	F81	female	CD45-	0.0903418	3365	0.0438247	0.101871	1	8.8	N	1	Supporting	Supp_preGC_I
FCA_GND8047885_AATCCAGGTTTGTGTG	2178	FCA_GND8047885	F81	female	CD45-	0.0231193	5623	0.140645	0.110867	1	8.8	N	1	Supporting	Supp_preGC_IIb
FCA_GND8047885_AATCCAGTCAATCTCT	4882	FCA_GND8047885	F81	female	CD45-	0.0406716	15367	0.211909	0.114094	1	8.8	N	1	Supporting	Supp_preGC_IIb
FCA_GND8047885_AATCCAGTCAGTTAGC	2374	FCA_GND8047885	F81	female	CD45-	0.0791039	5044	0.0798206	0.0777385	1	8.8	N	1	Supporting	Supp_preGC_I
FCA_GND8047885_AATCCAGTCCGCAAGC	1858	FCA_GND8047885	F81	female	CD45-	0.0606648	3610	0.176829	0.140645	1	8.8	N	1	Supporting	Supp_preGC_I
FCA_GND8047885_AATCCAGTCGAACGGA	2417	FCA_GND8047885	F81	female	CD45-	0.058531	5228	0.154696	0.110867	1	8.8	N	1	Supporting	Supp_preGC_I
FCA_GND8047885_AATCGGTAGATGCGAC	1011	FCA_GND8047885	F81	female	CD45-	0.0121212	2310	0.0373134	0.0798206	1	8.8	N	1	Supporting	Supp_preGC_IIa
FCA_GND8047885_AATCGGTAGGTACTCT	2127	FCA_GND8047885	F81	female	CD45-	0.0215035	5813	0.0614786	0.114094	1	8.8	N	1	Supporting	Supp_preGC_IIa
FCA_GND8047885_AATCGGTAGTGTCTCA	1727	FCA_GND8047885	F81	female	CD45-	0.00724819	4001	0.07	0.104762	1	8.8	N	1	Supporting	Supp_preGC_IIa
FCA_GND8047885_AATCGGTCAAGGGTCA	1933	FCA_GND8047885	F81	female	CD45-	0.0553605	3703	0.107759	0.104762	1	8.8	N	1	Supporting	Supp_preGC_I
FCA_GND8047885_AATCGGTCACAGAGGT	2171	FCA_GND8047885	F81	female	CD45-	0.0156608	5236	0.110867	0.104762	1	8.8	N	1	Supporting	Supp_preGC_IIb
FCA_GND8047885_AATCGGTCACGGCGTT	1617	FCA_GND8047885	F81	female	CD45-	0.0206622	4017	0.0864662	0.0777385	1	8.8	N	5	Coel Epi	Supp_ovarianSurf
FCA_GND8047885_AATCGGTCAGTGAGTG	1447	FCA_GND8047885	F81	female	CD45-	0.0237557	3536	0.0264901	0.0272981	1	8.8	N	0	Mesenchymal_GATA2_NR2F1	Mesen_dorsalMesentery
FCA_GND8047885_AATCGGTCATCCCATC	1734	FCA_GND8047885	F81	female	CD45-	0.0269003	4907	0.0630915	0.07	1	8.8	N	2	Mesenchymal_LHX9_ARX	Mesen_testisStroma
FCA_GND8047885_AATCGGTGTACAGACG	2074	FCA_GND8047885	F81	female	CD45-	0.0422913	4469	0.296552	0.140645	1	8.8	N	1	Supporting	Supp_preGC_I
FCA_GND8047885_AATCGGTGTTCGTTGA	1919	FCA_GND8047885	F81	female	CD45-	0.0280488	4920	0.0864662	0.117446	1	8.8	N	7	Endothelial	Endothelial
FCA_GND8047885_AATCGGTGTTGTCGCG	1735	FCA_GND8047885	F81	female	CD45-	0.0406542	4280	0.12093	0.075718	1	8.8	N	2	Mesenchymal_LHX9_ARX	Mesen_ovarianStroma
FCA_GND8047885_AATCGGTTCCGTTGTC	1844	FCA_GND8047885	F81	female	CD45-	0.0469048	4200	0.0718512	0.0512821	1	8.8	N	5	Coel Epi	Supp_ovarianSurf
FCA_GND8047885_AATCGGTTCGGATGTT	1846	FCA_GND8047885	F81	female	CD45-	0.0655084	3511	0.101871	0.112481	1	8.8	N	1	Supporting	Supp_preGC_I
FCA_GND8047885_AATCGGTTCTAGAGTC	1936	FCA_GND8047885	F81	female	CD45-	0.0404715	5090	0.0499648	0.0664506	1	8.8	N	2	Mesenchymal_LHX9_ARX	Mesen_ovarianStroma
FCA_GND8047885_ACACCAAAGCACACAG	2494	FCA_GND8047885	F81	female	CD45-	0.0353666	5033	0.326683	0.211909	1	8.8	N	1	Supporting	Supp_preGC_I
FCA_GND8047885_ACACCAAAGGTACTCT	2764	FCA_GND8047885	F81	female	CD45-	0.0806948	5527	0.0888252	0.0798206	1	8.8	N	1	Supporting	Supp_preGC_I
FCA_GND8047885_ACACCAACACCCAGTG	2276	FCA_GND8047885	F81	female	CD45-	0.0108601	6906	0.0363077	0.0614786	1	8.8	N	1	Supporting	Supp_preGC_IIa
FCA_GND8047885_ACACCAACAGGTCGTC	1551	FCA_GND8047885	F81	female	CD45-	0.0702422	2890	0.0486787	0.0777385	1	8.8	N	1	Supporting	Supp_preGC_I
FCA_GND8047885_ACACCAACATATGAGA	1894	FCA_GND8047885	F81	female	CD45-	0.0237762	4290	0.0499648	0.0737564	1	8.8	N	0	Mesenchymal_GATA2_NR2F1	Mesen_dorsalMesentery
FCA_GND8047885_ACACCAACATTACCTT	2364	FCA_GND8047885	F81	female	CD45-	0.0344887	5770	0.0798206	0.0963855	1	8.8	N	7	Endothelial	Endothelial
FCA_GND8047885_ACACCAAGTATAGTAG	1892	FCA_GND8047885	F81	female	CD45-	0.0198151	4542	0.176829	0.0737564	1	8.8	N	1	Supporting	Supp_preGC_IIb
FCA_GND8047885_ACACCAAGTGAAAGAG	1951	FCA_GND8047885	F81	female	CD45-	0.042675	5413	0.0841813	0.0876457	1	8.8	N	2	Mesenchymal_LHX9_ARX	Mesen_ovarianStroma
FCA_GND8047885_ACACCAAGTGGCTCCA	1921	FCA_GND8047885	F81	female	CD45-	0.0510152	3940	0.0937808	0.0888252	1	8.8	N	1	Supporting	Supp_preGC_I
FCA_GND8047885_ACACCAAGTGTAAGTA	2234	FCA_GND8047885	F81	female	CD45-	0.0368156	6356	0.0647482	0.0614786	1	8.8	N	9	PV	PV
FCA_GND8047885_ACACCAATCAACCAAC	2268	FCA_GND8047885	F81	female	CD45-	0.054028	4146	0.0393901	0.0554324	1	8.8	N	1	Supporting	Supp_preGC_I
FCA_GND8047885_ACACCAATCTGCTTGC	2345	FCA_GND8047885	F81	female	CD45-	0.00419956	5953	0.034358	0.0937808	1	8.8	N	1	Supporting	Supp_preGC_IIb
FCA_GND8047885_ACACCCTAGAACTGTA	3219	FCA_GND8047885	F81	female	CD45-	0.0150021	7199	0.0256971	0.0808939	1	8.8	N	1	Supporting	Supp_preGC_IIb
FCA_GND8047885_ACACCCTAGAGTCGGT	1290	FCA_GND8047885	F81	female	CD45-	0.0117697	2379	0.0219436	0.0415584	1	8.8	N	1	Supporting	Supp_preGC_IIb
FCA_GND8047885_ACACCCTAGATCGATA	2721	FCA_GND8047885	F81	female	CD45-	0.0490483	5464	0.0841813	0.0798206	1	8.8	N	1	Supporting	Supp_preGC_I
FCA_GND8047885_ACACCCTAGCGTAATA	3204	FCA_GND8047885	F81	female	CD45-	0.0638901	7059	0.0682005	0.0664506	1	8.8	N	1	Supporting	Supp_sLGR5_female
FCA_GND8047885_ACACCCTAGTGCGTGA	2154	FCA_GND8047885	F81	female	CD45-	0.0591166	4415	0.117446	0.0798206	1	8.8	N	1	Supporting	Supp_sLGR5_female
FCA_GND8047885_ACACCCTAGTTAACGA	1581	FCA_GND8047885	F81	female	CD45-	0.0279987	3143	0.0353228	0.107759	1	8.8	N	1	Supporting	Supp_preGC_IIb
FCA_GND8047885_ACACCCTCAATCACAC	2786	FCA_GND8047885	F81	female	CD45-	0.0278564	6713	0.145119	0.114094	1	8.8	N	1	Supporting	Supp_preGC_IIb
FCA_GND8047885_ACACCCTCACACGCTG	2490	FCA_GND8047885	F81	female	CD45-	0.052476	6765	0.124555	0.15983	1	8.8	N	2	Mesenchymal_LHX9_ARX	Mesen_ovarianStroma
FCA_GND8047885_ACACCCTCACCACCAG	2282	FCA_GND8047885	F81	female	CD45-	0.00495279	6461	0.034358	0.0798206	1	8.8	N	1	Supporting	Supp_preGC_IIb
FCA_GND8047885_ACACCCTCAGATCGGA	1814	FCA_GND8047885	F81	female	CD45-	0.0439589	3890	0.117446	0.0963855	1	8.8	N	1	Supporting	Supp_preGC_IIc
FCA_GND8047885_ACACCCTGTAGCGTGA	3460	FCA_GND8047885	F81	female	CD45-	0.0172879	10007	0.0630915	0.0808939	1	8.8	N	1	Supporting	Supp_preGC_IIb
FCA_GND8047885_ACACCCTGTCAGAAGC	2279	FCA_GND8047885	F81	female	CD45-	0.0306596	6034	0.149798	0.07	1	8.8	N	2	Mesenchymal_LHX9_ARX	Mesen_ovarianStroma
FCA_GND8047885_ACACCCTGTCGACTAT	2267	FCA_GND8047885	F81	female	CD45-	0.0413239	5106	0.0864662	0.114094	1	8.8	N	1	Supporting	Supp_preGC_IIa
FCA_GND8047885_ACACCCTGTCGCATCG	2861	FCA_GND8047885	F81	female	CD45-	0.0260093	7728	0.075718	0.0718512	1	8.8	N	0	Mesenchymal_GATA2_NR2F1	Mesenchymal_GATA2_NR2F1
FCA_GND8047885_ACACCCTGTGACGCCT	1558	FCA_GND8047885	F81	female	CD45-	0.00968222	4028	0.0554324	0.0404624	1	8.8	N	0	Mesenchymal_GATA2_NR2F1	Mesenchymal_GATA2_NR2F1
FCA_GND8047885_ACACCCTGTGCAACGA	2878	FCA_GND8047885	F81	female	CD45-	0.0273145	8933	0.0864662	0.0526316	1	8.8	N	2	Mesenchymal_LHX9_ARX	Mesen_ovarianStroma
FCA_GND8047885_ACACCCTGTTAAGGGC	2608	FCA_GND8047885	F81	female	CD45-	0.0541359	5283	0.136364	0.104762	1	8.8	N	1	Supporting	Supp_preGC_I
FCA_GND8047885_ACACCCTGTTAGATGA	2198	FCA_GND8047885	F81	female	CD45-	0.0122112	5323	0.196694	0.0737564	1	8.8	N	1	Supporting	Supp_sKITLG
FCA_GND8047885_ACACCCTTCCCTAATT	1904	FCA_GND8047885	F81	female	CD45-	0.0382028	4162	0.0393901	0.0647482	1	8.8	N	5	Coel Epi	Supp_coelEpi
FCA_GND8047885_ACACCGGAGAGGGATA	2157	FCA_GND8047885	F81	female	CD45-	0.0292226	5441	0.0554324	0.0606932	1	8.8	N	5	Coel Epi	Supp_ovarianSurf
FCA_GND8047885_ACACCGGAGCGTGAAC	2062	FCA_GND8047885	F81	female	CD45-	0.00641163	4679	0.034358	0.0474372	1	8.8	N	1	Supporting	Supp_preGC_IIa
FCA_GND8047885_ACACCGGAGGATTCGG	2712	FCA_GND8047885	F81	female	CD45-	0.0686959	6012	0.145119	0.147458	1	8.8	N	1	Supporting	Supp_preGC_I
FCA_GND8047885_ACACCGGAGTGCCAGA	2091	FCA_GND8047885	F81	female	CD45-	0.0281567	5718	0.183099	0.117446	1	8.8	N	9	PV	PV
FCA_GND8047885_ACACCGGCAAACGTGG	1937	FCA_GND8047885	F81	female	CD45-	0.047088	4035	0.075718	0.140645	1	8.8	N	1	Supporting	Supp_preGC_I
FCA_GND8047885_ACACCGGCACGGTAAG	2443	FCA_GND8047885	F81	female	CD45-	0.0713037	5147	0.0841813	0.11577	1	8.8	N	1	Supporting	Supp_sLGR5_female
FCA_GND8047885_ACACCGGCAGCATACT	2045	FCA_GND8047885	F81	female	CD45-	0.0823856	3957	0.0647482	0.0664506	1	8.8	N	1	Supporting	Supp_sLGR5_female
FCA_GND8047885_ACACCGGCAGCTGCAC	1861	FCA_GND8047885	F81	female	CD45-	0.0913594	3634	0.0841813	0.126442	1	8.8	N	1	Supporting	Supp_preGC_I
FCA_GND8047885_ACACCGGCAGCTTCGG	1671	FCA_GND8047885	F81	female	CD45-	0.0349876	4030	0.0554324	0.07	1	8.8	N	2	Mesenchymal_LHX9_ARX	Mesen_ovarianStroma
FCA_GND8047885_ACACCGGCATCACGTA	2783	FCA_GND8047885	F81	female	CD45-	0.0771448	5898	0.136364	0.0841813	1	8.8	N	1	Supporting	Supp_sLGR5_female
FCA_GND8047885_ACACCGGCATGAACCT	2212	FCA_GND8047885	F81	female	CD45-	0.0491252	4458	0.0819672	0.0937808	1	8.8	N	1	Supporting	Supp_sLGR5_female
FCA_GND8047885_ACACCGGGTGTTCTTT	2100	FCA_GND8047885	F81	female	CD45-	0.0273743	5370	0.0234043	0.0298165	1	8.8	N	5	Coel Epi	Supp_ovarianSurf
FCA_GND8047885_ACACCGGGTTGCGTTA	2137	FCA_GND8047885	F81	female	CD45-	0.0560791	4351	0.170877	0.112481	1	8.8	N	1	Supporting	Supp_preGC_I
FCA_GND8047885_ACACCGGTCAGCTTAG	2240	FCA_GND8047885	F81	female	CD45-	0.0220205	5177	0.132262	0.109313	1	8.8	N	1	Supporting	Supp_preGC_IIa
FCA_GND8047885_ACACCGGTCCAAAGTC	2403	FCA_GND8047885	F81	female	CD45-	0.0158349	6252	0.0841813	0.0963855	1	8.8	N	1	Supporting	Supp_preGC_IIb
FCA_GND8047885_ACACCGGTCCGCAGTG	2779	FCA_GND8047885	F81	female	CD45-	0.0387185	8084	0.117446	0.0963855	1	8.8	N	1	Supporting	Supp_preGC_IIa
FCA_GND8047885_ACACCGGTCGCTTGTC	2446	FCA_GND8047885	F81	female	CD45-	0.0706269	5168	0.0963855	0.0900437	1	8.8	N	1	Supporting	Supp_preGC_I
FCA_GND8047885_ACACCGGTCTACTCAT	2271	FCA_GND8047885	F81	female	CD45-	0.0531463	4704	0.524528	0.211909	1	8.8	N	1	Supporting	Supp_preGC_I
FCA_GND8047885_ACACTGAAGACTAGGC	2668	FCA_GND8047885	F81	female	CD45-	0.0161364	6569	0.117446	0.0900437	1	8.8	N	1	Supporting	Supp_preGC_IIc
FCA_GND8047885_ACACTGAAGGCCCGTT	1939	FCA_GND8047885	F81	female	CD45-	0.0647105	3817	0.0912621	0.112481	1	8.8	N	1	Supporting	Supp_preGC_I
FCA_GND8047885_ACACTGAAGTGTGGCA	2313	FCA_GND8047885	F81	female	CD45-	0.0314534	6454	0.101871	0.114094	1	8.8	N	1	Supporting	Supp_preGC_I
FCA_GND8047885_ACACTGACAAGAGGCT	2823	FCA_GND8047885	F81	female	CD45-	0.0180715	7415	0.07	0.0410827	1	8.8	N	1	Supporting	Supp_preGC_IIb
FCA_GND8047885_ACACTGACACCGAAAG	2553	FCA_GND8047885	F81	female	CD45-	0.0769848	4988	0.0718512	0.126442	1	8.8	N	1	Supporting	Supp_preGC_I
FCA_GND8047885_ACACTGACATCCGCGA	1784	FCA_GND8047885	F81	female	CD45-	0.0655833	3446	0.0937808	0.0777385	1	8.8	N	1	Supporting	Supp_preGC_I
FCA_GND8047885_ACACTGACATCCTTGC	1978	FCA_GND8047885	F81	female	CD45-	0.0435455	3881	0.140645	0.140645	1	8.8	N	1	Supporting	Supp_preGC_I
FCA_GND8047885_ACACTGACATGTCCTC	2572	FCA_GND8047885	F81	female	CD45-	0.0231438	6438	0.110867	0.110867	1	8.8	N	1	Supporting	Supp_preGC_IIb
FCA_GND8047885_ACACTGAGTATCGCAT	1851	FCA_GND8047885	F81	female	CD45-	0.0346701	3865	0.259259	0.147458	1	8.8	N	1	Supporting	Supp_sKITLG
FCA_GND8047885_ACACTGAGTATGAATG	2366	FCA_GND8047885	F81	female	CD45-	0.0515848	4827	0.0363077	0.0599078	1	8.8	N	1	Supporting	Supp_preGC_I
FCA_GND8047885_ACACTGAGTTATCCGA	2547	FCA_GND8047885	F81	female	CD45-	0.0155807	6354	0.140645	0.0937808	1	8.8	N	1	Supporting	Supp_preGC_IIb
FCA_GND8047885_ACACTGAGTTTCCACC	2130	FCA_GND8047885	F81	female	CD45-	0.0762732	4261	0.117446	0.104762	1	8.8	N	1	Supporting	Supp_preGC_I
FCA_GND8047885_ACACTGATCAGGTAAA	1848	FCA_GND8047885	F81	female	CD45-	0.0212546	4846	0.0963855	0.0718512	1	8.8	N	2	Mesenchymal_LHX9_ARX	Mesen_ovarianStroma
FCA_GND8047885_ACACTGATCGAGGTAG	2686	FCA_GND8047885	F81	female	CD45-	0.0330065	6120	0.0599078	0.0808939	1	8.8	N	1	Supporting	Supp_preGC_IIb
FCA_GND8047885_ACACTGATCGTGGTCG	2245	FCA_GND8047885	F81	female	CD45-	0.0357999	5838	0.0888252	0.0591427	1	8.8	N	7	Endothelial	Endothelial
FCA_GND8047885_ACAGCCGAGAGAGCTC	2110	FCA_GND8047885	F81	female	CD45-	0.0392841	4302	0.0682005	0.0888252	1	8.8	N	1	Supporting	Supp_preGC_I
FCA_GND8047885_ACAGCCGAGCAGGCTA	1550	FCA_GND8047885	F81	female	CD45-	0.0174608	3379	0.034358	0.0334129	1	8.8	N	0	Mesenchymal_GATA2_NR2F1	Mesen_dorsalMesentery
FCA_GND8047885_ACAGCCGAGTCGTTTG	2038	FCA_GND8047885	F81	female	CD45-	0.0159296	4771	0.075718	0.075718	1	8.8	N	0	Mesenchymal_GATA2_NR2F1	Mesenchymal_GATA2_NR2F1
FCA_GND8047885_ACAGCCGAGTGACTCT	1834	FCA_GND8047885	F81	female	CD45-	0.0739486	3543	0.124555	0.0841813	1	8.8	N	1	Supporting	Supp_sLGR5_female
FCA_GND8047885_ACAGCCGCAATAGCAA	2421	FCA_GND8047885	F81	female	CD45-	0.02572	5521	0.104762	0.07	1	8.8	N	1	Supporting	Supp_preGC_IIb
FCA_GND8047885_ACAGCCGCACAAGACG	2020	FCA_GND8047885	F81	female	CD45-	0.0267127	5503	0.0383407	0.0512821	1	8.8	N	5	Coel Epi	Supp_ovarianSurf
FCA_GND8047885_ACAGCCGCACGCATCG	2292	FCA_GND8047885	F81	female	CD45-	0.0582215	4397	0.0664506	0.0777385	1	8.8	N	1	Supporting	Supp_preGC_I
FCA_GND8047885_ACAGCCGCACGGTAGA	2687	FCA_GND8047885	F81	female	CD45-	0.0551582	6291	0.0841813	0.147458	1	8.8	N	1	Supporting	Supp_preGC_I
FCA_GND8047885_ACAGCCGGTACCCAAT	1965	FCA_GND8047885	F81	female	CD45-	0.0351002	5641	0.0737564	0.0737564	1	8.8	N	0	Mesenchymal_GATA2_NR2F1	Mesen_dorsalMesentery
FCA_GND8047885_ACAGCCGGTTCAGCGC	2642	FCA_GND8047885	F81	female	CD45-	0.0622436	5607	0.0583776	0.109313	1	8.8	N	1	Supporting	Supp_sLGR5_female
FCA_GND8047885_ACAGCCGTCATGTCCC	2184	FCA_GND8047885	F81	female	CD45-	0.00617641	5181	0.0219436	0.0474372	1	8.8	N	1	Supporting	Supp_preGC_IIb
FCA_GND8047885_ACAGCCGTCATTTGGG	1943	FCA_GND8047885	F81	female	CD45-	0.0274127	5326	0.0315789	0.0647482	1	8.8	N	5	Coel Epi	Supp_coelEpi
FCA_GND8047885_ACAGCCGTCCGTAGGC	1977	FCA_GND8047885	F81	female	CD45-	0.0487335	3632	0.0990807	0.104762	1	8.8	N	1	Supporting	Supp_preGC_I
FCA_GND8047885_ACAGCCGTCTCGTTTA	2692	FCA_GND8047885	F81	female	CD45-	0.0763234	5516	0.117446	0.12093	1	8.8	N	1	Supporting	Supp_preGC_I
FCA_GND8047885_ACAGCCGTCTCTGTCG	1825	FCA_GND8047885	F81	female	CD45-	0.0566676	3547	0.0819672	0.0888252	1	8.8	N	1	Supporting	Supp_preGC_I
FCA_GND8047885_ACAGCTAAGATCCGAG	2689	FCA_GND8047885	F81	female	CD45-	0.0128298	6937	0.075718	0.128329	1	8.8	N	1	Supporting	Supp_preGC_IIb
FCA_GND8047885_ACAGCTAAGCCAGTAG	1999	FCA_GND8047885	F81	female	CD45-	0.0375712	5616	0.0499648	0.0664506	1	8.8	N	2	Mesenchymal_LHX9_ARX	Mesen_ovarianStroma
FCA_GND8047885_ACAGCTAAGCCGCCTA	2404	FCA_GND8047885	F81	female	CD45-	0.0141169	6517	0.0937808	0.110867	1	8.8	N	1	Supporting	Supp_preGC_IIb
FCA_GND8047885_ACAGCTAAGCTAACAA	2759	FCA_GND8047885	F81	female	CD45-	0.022773	6455	0.183099	0.104762	1	8.8	N	1	Supporting	Supp_preGC_IIa
FCA_GND8047885_ACAGCTAAGGTGCTTT	2413	FCA_GND8047885	F81	female	CD45-	0.0175408	5815	0.211909	0.110867	1	8.8	N	1	Supporting	Supp_preGC_IIb
FCA_GND8047885_ACAGCTAAGTTACCCA	1879	FCA_GND8047885	F81	female	CD45-	0.0256926	4476	0.136364	0.123615	1	8.8	N	7	Endothelial	Endothelial
FCA_GND8047885_ACAGCTACAACGCACC	1677	FCA_GND8047885	F81	female	CD45-	0.0450833	3061	0.0426789	0.0526316	1	8.8	N	1	Supporting	Supp_preGC_I
FCA_GND8047885_ACAGCTACAGCCTTTC	1944	FCA_GND8047885	F81	female	CD45-	0.0598111	3812	0.110867	0.11577	1	8.8	N	1	Supporting	Supp_preGC_I
FCA_GND8047885_ACAGCTACAGTAAGAT	2346	FCA_GND8047885	F81	female	CD45-	0.0266961	5881	0.140645	0.0480507	1	8.8	N	1	Supporting	Supp_preGC_IIb
FCA_GND8047885_ACAGCTACATCTATGG	2251	FCA_GND8047885	F81	female	CD45-	0.027027	6586	0.0583776	0.0647482	1	8.8	N	5	Coel Epi	Supp_coelEpi
FCA_GND8047885_ACAGCTACATGATCCA	1949	FCA_GND8047885	F81	female	CD45-	0.0293701	4937	0.0888252	0.0664506	1	8.8	N	2	Mesenchymal_LHX9_ARX	Mesen_ovarianStroma
FCA_GND8047885_ACAGCTAGTAGCCTAT	2041	FCA_GND8047885	F81	female	CD45-	0.045354	5424	0.0630915	0.0888252	1	8.8	N	1	Supporting	Supp_preGC_IIa
FCA_GND8047885_ACAGCTAGTCAACATC	2195	FCA_GND8047885	F81	female	CD45-	0.0424328	5656	0.0393901	0.0181832	1	8.8	N	0	Mesenchymal_GATA2_NR2F1	Mesen_dorsalMesentery
FCA_GND8047885_ACAGCTAGTCGGATCC	2041	FCA_GND8047885	F81	female	CD45-	0.0732169	4753	0.0912621	0.109313	1	8.8	N	1	Supporting	Supp_preGC_I
FCA_GND8047885_ACAGCTAGTCTCCACT	534	FCA_GND8047885	F81	female	CD45-	0.0155892	2181	0.07	0.07	1	8.8	N	10	Erythroid	Erythroid
FCA_GND8047885_ACAGCTAGTGGTCCGT	2532	FCA_GND8047885	F81	female	CD45-	0.0400619	7114	0.101871	0.211909	1	8.8	N	1	Supporting	Supp_preGC_I
FCA_GND8047885_ACAGCTAGTTTCCACC	2487	FCA_GND8047885	F81	female	CD45-	0.0596803	5630	0.0777385	0.101871	1	8.8	N	1	Supporting	Supp_preGC_I
FCA_GND8047885_ACAGCTATCCACGTGG	1064	FCA_GND8047885	F81	female	CD45-	0.0211236	2225	0.0191726	0.0334129	1	8.8	N	0	Mesenchymal_GATA2_NR2F1	Mesenchymal_GATA2_NR2F1
FCA_GND8047885_ACAGCTATCCTCAATT	2598	FCA_GND8047885	F81	female	CD45-	0.0572703	5605	0.22905	0.147458	1	8.8	N	1	Supporting	Supp_preGC_I
FCA_GND8047885_ACAGCTATCGGCATCG	2050	FCA_GND8047885	F81	female	CD45-	0.0478097	4246	0.183099	0.0888252	1	8.8	N	1	Supporting	Supp_preGC_I
FCA_GND8047885_ACAGCTATCGTTGACA	2331	FCA_GND8047885	F81	female	CD45-	0.0642419	5059	0.107759	0.0841813	1	8.8	N	1	Supporting	Supp_preGC_I
FCA_GND8047885_ACAGCTATCTACCTGC	2259	FCA_GND8047885	F81	female	CD45-	0.0357673	7409	0.0334129	0.0606932	1	8.8	N	5	Coel Epi	Supp_ovarianSurf
FCA_GND8047885_ACATACGAGTCCGGTC	2124	FCA_GND8047885	F81	female	CD45-	0.0620757	4124	0.0963855	0.0937808	1	8.8	N	1	Supporting	Supp_sLGR5_female
FCA_GND8047885_ACATACGAGTCCGTAT	1923	FCA_GND8047885	F81	female	CD45-	0.0364595	4361	0.128329	0.107759	1	8.8	N	1	Supporting	Supp_preGC_IIa
FCA_GND8047885_ACATACGCACGGACAA	1992	FCA_GND8047885	F81	female	CD45-	0.0716621	3977	0.0614786	0.0798206	1	8.8	N	1	Supporting	Supp_preGC_I
FCA_GND8047885_ACATACGCAGACGCCT	3394	FCA_GND8047885	F81	female	CD45-	0.0589964	8848	0.145119	0.0841813	1	8.8	N	1	Supporting	Supp_preGC_I
FCA_GND8047885_ACATACGGTCGCTTCT	2003	FCA_GND8047885	F81	female	CD45-	0.0679513	3944	0.104762	0.104762	1	8.8	N	1	Supporting	Supp_preGC_I
FCA_GND8047885_ACATACGGTTCCATGA	2992	FCA_GND8047885	F81	female	CD45-	0.0505444	8725	0.0554324	0.0718512	1	8.8	N	0	Mesenchymal_GATA2_NR2F1	Mesenchymal_GATA2_NR2F1
FCA_GND8047885_ACATACGTCAAACCAC	2817	FCA_GND8047885	F81	female	CD45-	0.0227461	7254	0.15983	0.119188	1	8.8	N	1	Supporting	Supp_preGC_IIb
FCA_GND8047885_ACATACGTCGGTCTAA	2054	FCA_GND8047885	F81	female	CD45-	0.0133356	5849	0.0438247	0.0614786	1	8.8	N	2	Mesenchymal_LHX9_ARX	Mesen_ovarianStroma
FCA_GND8047885_ACATCAGAGTACGCGA	2519	FCA_GND8047885	F81	female	CD45-	0.0395839	6922	0.07	0.0876457	1	8.8	N	2	Mesenchymal_LHX9_ARX	Mesen_ovarianStroma
FCA_GND8047885_ACATCAGAGTTAACGA	2515	FCA_GND8047885	F81	female	CD45-	0.0152006	7105	0.0798206	0.0526316	1	8.8	N	2	Mesenchymal_LHX9_ARX	Mesen_ovarianStroma
FCA_GND8047885_ACATCAGCAATACGCT	1379	FCA_GND8047885	F81	female	CD45-	0.0545318	2659	0.0540146	0.0798206	1	8.8	N	1	Supporting	Supp_preGC_IIa
FCA_GND8047885_ACATCAGCACACGCTG	2688	FCA_GND8047885	F81	female	CD45-	0.0100618	6957	0.0819672	0.0718512	1	8.8	N	1	Supporting	Supp_preGC_IIb
FCA_GND8047885_ACATCAGCACGAAAGC	2666	FCA_GND8047885	F81	female	CD45-	0.031708	7506	0.0798206	0.075718	1	8.8	N	0	Mesenchymal_GATA2_NR2F1	Mesenchymal_GATA2_NR2F1
FCA_GND8047885_ACATCAGCACTATCTT	2661	FCA_GND8047885	F81	female	CD45-	0.0738973	6076	0.0777385	0.104762	1	8.8	N	1	Supporting	Supp_preGC_I
FCA_GND8047885_ACATCAGGTAAATGAC	2462	FCA_GND8047885	F81	female	CD45-	0.0379493	6983	0.136364	0.0647482	1	8.8	N	5	Coel Epi	Supp_coelEpi
FCA_GND8047885_ACATCAGGTTCCAACA	1835	FCA_GND8047885	F81	female	CD45-	0.0223187	4839	0.0526316	0.0682005	1	8.8	N	1	Supporting	Supp_preGC_IIa
FCA_GND8047885_ACATCAGGTTGGACCC	1746	FCA_GND8047885	F81	female	CD45-	0.0321348	4450	0.128329	0.109313	1	8.8	N	2	Mesenchymal_LHX9_ARX	Mesen_ovarianStroma
FCA_GND8047885_ACATCAGGTTTGGGCC	1562	FCA_GND8047885	F81	female	CD45-	0.0774673	2827	0.114094	0.0554324	1	8.8	N	1	Supporting	Supp_preGC_I
FCA_GND8047885_ACATCAGTCAGCGACC	2345	FCA_GND8047885	F81	female	CD45-	0.0300984	5183	0.0864662	0.104762	1	8.8	N	1	Supporting	Supp_preGC_IIb
FCA_GND8047885_ACATCAGTCCTCAATT	2342	FCA_GND8047885	F81	female	CD45-	0.0488588	5608	0.196694	0.109313	1	8.8	N	1	Supporting	Supp_sKITLG
FCA_GND8047885_ACATGGTAGAACAATC	2655	FCA_GND8047885	F81	female	CD45-	0.0851826	7255	0.0912621	0.0876457	1	8.8	N	2	Mesenchymal_LHX9_ARX	Mesen_ovarianStroma
FCA_GND8047885_ACATGGTAGGCTAGGT	2563	FCA_GND8047885	F81	female	CD45-	0.0390495	6607	0.0937808	0.114094	1	8.8	N	1	Supporting	Supp_preGC_IIb
FCA_GND8047885_ACATGGTCAAGAGTCG	2450	FCA_GND8047885	F81	female	CD45-	0.0400646	6190	0.104762	0.104762	1	8.8	N	1	Supporting	Supp_preGC_IIb
FCA_GND8047885_ACATGGTCACATTTCT	1498	FCA_GND8047885	F81	female	CD45-	0.0204429	2935	0.0102816	0.0130112	1	8.8	N	0	Mesenchymal_GATA2_NR2F1	Mesenchymal_GATA2_NR2F1
FCA_GND8047885_ACATGGTCAGTAACGG	1506	FCA_GND8047885	F81	female	CD45-	0.00936273	3311	0.0159652	0.0130112	1	8.8	N	0	Mesenchymal_GATA2_NR2F1	Mesenchymal_GATA2_NR2F1
FCA_GND8047885_ACATGGTCATTCCTGC	2849	FCA_GND8047885	F81	female	CD45-	0.0316024	8069	0.0912621	0.0682997	1	8.8	N	9	PV	PV
FCA_GND8047885_ACATGGTGTGTTCTTT	1808	FCA_GND8047885	F81	female	CD45-	0.0114504	5240	0.0664506	0.0798206	1	8.8	N	1	Supporting	Supp_preGC_IIa
FCA_GND8047885_ACATGGTTCATAAAGG	2230	FCA_GND8047885	F81	female	CD45-	0.020722	6177	0.12093	0.075718	1	8.8	N	2	Mesenchymal_LHX9_ARX	Mesen_ovarianStroma
FCA_GND8047885_ACATGGTTCCTGCCAT	2490	FCA_GND8047885	F81	female	CD45-	0.00932897	6110	0.0393901	0.0547235	1	8.8	N	1	Supporting	Supp_preGC_IIb
FCA_GND8047885_ACATGGTTCGAGGTAG	2060	FCA_GND8047885	F81	female	CD45-	0.0496399	3888	0.075718	0.0526316	1	8.8	N	1	Supporting	Supp_preGC_I
FCA_GND8047885_ACCAGTAAGAAACGAG	2463	FCA_GND8047885	F81	female	CD45-	0.0243902	7544	0.0682005	0.0526316	1	8.8	N	2	Mesenchymal_LHX9_ARX	Mesen_ovarianStroma
FCA_GND8047885_ACCAGTAAGACAGGCT	2169	FCA_GND8047885	F81	female	CD45-	0.0167233	7355	0.0198473	0.0664506	1	8.8	N	2	Mesenchymal_LHX9_ARX	Mesen_ovarianStroma
FCA_GND8047885_ACCAGTAAGGATGGAA	2621	FCA_GND8047885	F81	female	CD45-	0.0309747	7038	0.211909	0.104762	1	8.8	N	1	Supporting	Supp_preGC_I
FCA_GND8047885_ACCAGTAAGGCAATTA	2943	FCA_GND8047885	F81	female	CD45-	0.0518636	6305	0.07	0.104762	1	8.8	N	1	Supporting	Supp_preGC_I
FCA_GND8047885_ACCAGTAAGGCCCGTT	2068	FCA_GND8047885	F81	female	CD45-	0.024641	6128	0.0499648	0.0876457	1	8.8	N	2	Mesenchymal_LHX9_ARX	Mesen_ovarianStroma
FCA_GND8047885_ACCAGTAAGGTCATCT	2075	FCA_GND8047885	F81	female	CD45-	0.0237543	5178	0.0554324	0.0718512	1	8.8	N	2	Mesenchymal_LHX9_ARX	Mesen_ovarianStroma
FCA_GND8047885_ACCAGTAAGTCCGGTC	1256	FCA_GND8047885	F81	female	CD45-	0.0180505	3324	0.176829	0.117446	1	8.8	N	9	PV	PV
FCA_GND8047885_ACCAGTAAGTTAGGTA	2969	FCA_GND8047885	F81	female	CD45-	0.0196481	7787	0.165217	0.119188	1	8.8	N	1	Supporting	Supp_preGC_IIb
FCA_GND8047885_ACCAGTACAGCCTGTG	4011	FCA_GND8047885	F81	female	CD45-	0.0463092	11488	0.524528	0.12093	1	8.8	N	1	Supporting	Supp_preGC_I
FCA_GND8047885_ACCAGTACAGCTGTGC	2154	FCA_GND8047885	F81	female	CD45-	0.0201547	4912	0.0718512	0.0682005	1	8.8	N	1	Supporting	Supp_preGC_IIa
FCA_GND8047885_ACCAGTACAGGATCGA	2495	FCA_GND8047885	F81	female	CD45-	0.033265	6343	0.145119	0.106369	1	8.8	N	1	Supporting	Supp_preGC_IIb
FCA_GND8047885_ACCAGTACAGGTCTCG	2131	FCA_GND8047885	F81	female	CD45-	0.0515317	4211	0.0630915	0.0664506	1	8.8	N	1	Supporting	Supp_sLGR5_female
FCA_GND8047885_ACCAGTACATTGAGCT	2033	FCA_GND8047885	F81	female	CD45-	0.0355584	6187	0.0568862	0.07	1	8.8	N	2	Mesenchymal_LHX9_ARX	Mesen_ovarianStroma
FCA_GND8047885_ACCAGTAGTAGAGGAA	1624	FCA_GND8047885	F81	female	CD45-	0.00837696	3820	0.0449966	0.0937808	1	8.8	N	1	Supporting	Supp_preGC_IIa
FCA_GND8047885_ACCAGTAGTCTCTCGT	2709	FCA_GND8047885	F81	female	CD45-	0.0525161	6379	0.211909	0.211909	1	8.8	N	1	Supporting	Supp_preGC_I
FCA_GND8047885_ACCAGTATCAAACGGG	2614	FCA_GND8047885	F81	female	CD45-	0.0768828	5723	0.0718512	0.0841813	1	8.8	N	1	Supporting	Supp_preGC_I
FCA_GND8047885_ACCAGTATCGATAGAA	1915	FCA_GND8047885	F81	female	CD45-	0.0270603	4878	0.0647482	0.0526316	1	8.8	N	2	Mesenchymal_LHX9_ARX	Mesen_ovarianStroma
FCA_GND8047885_ACCAGTATCGGAAATA	2297	FCA_GND8047885	F81	female	CD45-	0.0439794	6594	0.0819672	0.0647482	1	8.8	N	5	Coel Epi	Supp_coelEpi
FCA_GND8047885_ACCAGTATCGTCTGCT	2087	FCA_GND8047885	F81	female	CD45-	0.00977	4913	0.0937808	0.104762	1	8.8	N	1	Supporting	Supp_preGC_IIb
FCA_GND8047885_ACCCACTAGCTAGTTC	2436	FCA_GND8047885	F81	female	CD45-	0.00837764	6207	0.0256971	0.104762	1	8.8	N	1	Supporting	Supp_preGC_IIb
FCA_GND8047885_ACCCACTCACCAGGTC	3180	FCA_GND8047885	F81	female	CD45-	0.0362187	9912	0.140645	0.0614786	1	8.8	N	2	Mesenchymal_LHX9_ARX	Mesen_ovarianStroma
FCA_GND8047885_ACCCACTCAGGCTGAA	1973	FCA_GND8047885	F81	female	CD45-	0.0600103	3866	0.0963855	0.0526316	1	8.8	N	1	Supporting	Supp_preGC_I
FCA_GND8047885_ACCCACTCAGTGGGAT	2438	FCA_GND8047885	F81	female	CD45-	0.0191875	6671	0.0554324	0.075718	1	8.8	N	0	Mesenchymal_GATA2_NR2F1	Mesenchymal_GATA2_NR2F1
FCA_GND8047885_ACCCACTCATAAAGGT	2810	FCA_GND8047885	F81	female	CD45-	0.0351453	6402	0.0737564	0.0410827	1	8.8	N	1	Supporting	Supp_preGC_IIb
FCA_GND8047885_ACCCACTCATGGGACA	2156	FCA_GND8047885	F81	female	CD45-	0.0172226	5516	0.075718	0.0480507	1	8.8	N	1	Supporting	Supp_preGC_IIb
FCA_GND8047885_ACCCACTGTCTCACCT	2770	FCA_GND8047885	F81	female	CD45-	0.0592996	6796	0.154696	0.0900437	1	8.8	N	1	Supporting	Supp_preGC_IIb
FCA_GND8047885_ACCCACTGTTTAAGCC	2642	FCA_GND8047885	F81	female	CD45-	0.0678811	5819	0.128329	0.126442	1	8.8	N	1	Supporting	Supp_preGC_I
FCA_GND8047885_ACCCACTTCAGTTAGC	2710	FCA_GND8047885	F81	female	CD45-	0.0714867	6141	0.0937808	0.12093	1	8.8	N	1	Supporting	Supp_preGC_I
FCA_GND8047885_ACCCACTTCCGCGCAA	1996	FCA_GND8047885	F81	female	CD45-	0.0319495	4914	0.0718512	0.0876457	1	8.8	N	2	Mesenchymal_LHX9_ARX	Mesen_ovarianStroma
FCA_GND8047885_ACCCACTTCCGTAGTA	2800	FCA_GND8047885	F81	female	CD45-	0.0411932	9152	0.0568862	0.0547235	1	8.8	N	2	Mesenchymal_LHX9_ARX	Mesen_ovarianStroma
FCA_GND8047885_ACCCACTTCTGCCCTA	2412	FCA_GND8047885	F81	female	CD45-	0.0249365	6697	0.0568862	0.0647482	1	8.8	N	0	Mesenchymal_GATA2_NR2F1	Mesenchymal_GATA2_NR2F1
FCA_GND8047885_ACCCACTTCTGTTGAG	2813	FCA_GND8047885	F81	female	CD45-	0.0270966	9706	0.0630915	0.075718	1	8.8	N	2	Mesenchymal_LHX9_ARX	Mesen_ovarianStroma
FCA_GND8047885_ACCGTAAAGCGAAGGG	2324	FCA_GND8047885	F81	female	CD45-	0.0360404	6132	0.0963855	0.0963855	1	8.8	N	1	Supporting	Supp_preGC_IIa
FCA_GND8047885_ACCGTAAAGCTAAGAT	2196	FCA_GND8047885	F81	female	CD45-	0.0335926	5656	0.170877	0.0737564	1	8.8	N	1	Supporting	Supp_preGC_IIa
FCA_GND8047885_ACCGTAACAACACCCG	2328	FCA_GND8047885	F81	female	CD45-	0.00390564	6401	0.0415584	0.0614786	1	8.8	N	1	Supporting	Supp_preGC_IIa
FCA_GND8047885_ACCGTAACAAGAAAGG	1988	FCA_GND8047885	F81	female	CD45-	0.0445874	4508	0.270789	0.211909	1	8.8	N	1	Supporting	Supp_preGC_I
FCA_GND8047885_ACCGTAACACCTTGTC	2616	FCA_GND8047885	F81	female	CD45-	0.0330905	6588	0.149798	0.075718	1	8.8	N	1	Supporting	Supp_preGC_IIb
FCA_GND8047885_ACCGTAACACGACTCG	1207	FCA_GND8047885	F81	female	CD45-	0.0199609	2555	0.0153551	0.0334129	1	8.8	N	0	Mesenchymal_GATA2_NR2F1	Mesen_dorsalMesentery
FCA_GND8047885_ACCGTAAGTCTAACGT	2115	FCA_GND8047885	F81	female	CD45-	0.0330801	4081	0.0798206	0.109313	1	8.8	N	1	Supporting	Supp_sLGR5_female
FCA_GND8047885_ACCGTAAGTGATGTGG	1502	FCA_GND8047885	F81	female	CD45-	0.0311581	3402	0.117446	0.117446	1	8.8	N	7	Endothelial	Endothelial
FCA_GND8047885_ACCGTAAGTTCTGAAC	2160	FCA_GND8047885	F81	female	CD45-	0.0408602	4185	0.154696	0.126442	1	8.8	N	1	Supporting	Supp_preGC_I
FCA_GND8047885_ACCGTAATCTCCTATA	1885	FCA_GND8047885	F81	female	CD45-	0.0498764	4451	0.15983	0.15983	1	8.8	N	2	Mesenchymal_LHX9_ARX	Mesen_ovarianStroma
FCA_GND8047885_ACCGTAATCTGCGACG	2426	FCA_GND8047885	F81	female	CD45-	0.0431629	5514	0.0841813	0.109313	1	8.8	N	1	Supporting	Supp_sLGR5_female
FCA_GND8047885_ACCTTTAAGCGATTCT	2827	FCA_GND8047885	F81	female	CD45-	0.0598784	6413	0.0718512	0.0900437	1	8.8	N	1	Supporting	Supp_preGC_I
FCA_GND8047885_ACCTTTAAGCTTTGGT	1852	FCA_GND8047885	F81	female	CD45-	0.0407785	4316	0.0737564	0.0963855	1	8.8	N	7	Endothelial	Endothelial
FCA_GND8047885_ACCTTTACAGGCGATA	2230	FCA_GND8047885	F81	female	CD45-	0.011128	5931	0.0682005	0.0682005	1	8.8	N	1	Supporting	Supp_preGC_IIa
FCA_GND8047885_ACCTTTACAGTTCATG	2027	FCA_GND8047885	F81	female	CD45-	0.0516567	3833	0.101871	0.110867	1	8.8	N	1	Supporting	Supp_preGC_I
FCA_GND8047885_ACCTTTACATAACCTG	2114	FCA_GND8047885	F81	female	CD45-	0.0220949	4888	0.0777385	0.075718	1	8.8	N	0	Mesenchymal_GATA2_NR2F1	Mesen_dorsalMesentery
FCA_GND8047885_ACCTTTAGTAAGGATT	1348	FCA_GND8047885	F81	female	CD45-	0.0340067	2970	0.0172159	0.0130112	1	8.8	N	0	Mesenchymal_GATA2_NR2F1	Mesenchymal_GATA2_NR2F1
FCA_GND8047885_ACCTTTAGTCGAACAG	1921	FCA_GND8047885	F81	female	CD45-	0.0326335	4811	0.104762	0.0614786	1	8.8	N	2	Mesenchymal_LHX9_ARX	Mesen_ovarianStroma
FCA_GND8047885_ACCTTTAGTCTCTTAT	1838	FCA_GND8047885	F81	female	CD45-	0.0417802	4404	0.0614786	0.0614786	1	8.8	N	9	PV	PV
FCA_GND8047885_ACCTTTAGTTCTGTTT	2839	FCA_GND8047885	F81	female	CD45-	0.0616051	6006	0.204082	0.12093	1	8.8	N	1	Supporting	Supp_preGC_I
FCA_GND8047885_ACCTTTATCACAACGT	2994	FCA_GND8047885	F81	female	CD45-	0.0947014	5945	0.0599078	0.12093	1	8.8	N	1	Supporting	Supp_preGC_I
FCA_GND8047885_ACCTTTATCACGACTA	2513	FCA_GND8047885	F81	female	CD45-	0.0738765	6186	0.124555	0.0841813	1	8.8	N	1	Supporting	Supp_preGC_I
FCA_GND8047885_ACCTTTATCGTTACAG	2051	FCA_GND8047885	F81	female	CD45-	0.0647655	3752	0.0583776	0.0526316	1	8.8	N	1	Supporting	Supp_preGC_I
FCA_GND8047885_ACGAGCCAGAAACCGC	2538	FCA_GND8047885	F81	female	CD45-	0.0643853	5669	0.12093	0.12093	1	8.8	N	1	Supporting	Supp_preGC_I
FCA_GND8047885_ACGAGCCAGAGGGCTT	2734	FCA_GND8047885	F81	female	CD45-	0.0403501	6741	0.0614786	0.0480507	1	8.8	N	1	Supporting	Supp_preGC_IIb
FCA_GND8047885_ACGAGCCAGAGGTAGA	1650	FCA_GND8047885	F81	female	CD45-	0.0183265	4147	0.0315789	0.0334129	1	8.8	N	0	Mesenchymal_GATA2_NR2F1	Mesen_dorsalMesentery
FCA_GND8047885_ACGAGCCCAGCTATTG	2228	FCA_GND8047885	F81	female	CD45-	0.0614187	4624	0.0819672	0.211909	1	8.8	N	1	Supporting	Supp_preGC_I
FCA_GND8047885_ACGAGCCGTGTTGGGA	1970	FCA_GND8047885	F81	female	CD45-	0.0512733	5851	0.0990807	0.0614786	1	8.8	N	1	Supporting	Supp_preGC_IIa
FCA_GND8047885_ACGAGCCGTTACCGAT	1970	FCA_GND8047885	F81	female	CD45-	0.0565635	3748	0.0554324	0.0664506	1	8.8	N	1	Supporting	Supp_preGC_I
FCA_GND8047885_ACGAGCCTCCAAACAC	2306	FCA_GND8047885	F81	female	CD45-	0.0674048	5148	0.075718	0.0841813	1	8.8	N	1	Supporting	Supp_sLGR5_female
FCA_GND8047885_ACGAGCCTCCTAGAAC	1871	FCA_GND8047885	F81	female	CD45-	0.0157633	3616	0.0583776	0.0819672	1	8.8	N	9	PV	PV
FCA_GND8047885_ACGAGCCTCCTGCTTG	2261	FCA_GND8047885	F81	female	CD45-	0.0360861	5764	0.196694	0.104762	1	8.8	N	1	Supporting	Supp_preGC_IIb
FCA_GND8047885_ACGAGCCTCGTCCGTT	2124	FCA_GND8047885	F81	female	CD45-	0.0155082	5352	0.0682005	0.114094	1	8.8	N	1	Supporting	Supp_preGC_IIa
FCA_GND8047885_ACGAGGAAGCGTGAAC	2101	FCA_GND8047885	F81	female	CD45-	0.0615711	4710	0.075718	0.109313	1	8.8	N	1	Supporting	Supp_sLGR5_female
FCA_GND8047885_ACGAGGAAGTTGAGAT	1506	FCA_GND8047885	F81	female	CD45-	0.0245979	3171	0.0798206	0.0334129	1	8.8	N	0	Mesenchymal_GATA2_NR2F1	Mesen_dorsalMesentery
FCA_GND8047885_ACGAGGACAAAGAATC	1578	FCA_GND8047885	F81	female	CD45-	0.0210108	3522	0.0647482	0.0682005	1	8.8	N	1	Supporting	Supp_preGC_IIa
FCA_GND8047885_ACGAGGACAAGCCTAT	1537	FCA_GND8047885	F81	female	CD45-	0.0485203	2906	0.0393901	0.0526316	1	8.8	N	1	Supporting	Supp_preGC_I
FCA_GND8047885_ACGAGGACAAGTTAAG	1954	FCA_GND8047885	F81	female	CD45-	0.0456112	3771	0.15983	0.104762	1	8.8	N	1	Supporting	Supp_preGC_I
FCA_GND8047885_ACGAGGACACGGTGTC	1724	FCA_GND8047885	F81	female	CD45-	0.0424641	3344	0.124555	0.109313	1	8.8	N	1	Supporting	Supp_sLGR5_female
FCA_GND8047885_ACGAGGACAGATCCAT	2082	FCA_GND8047885	F81	female	CD45-	0.0174551	5729	0.0888252	0.075718	1	8.8	N	0	Mesenchymal_GATA2_NR2F1	Mesenchymal_GATA2_NR2F1
FCA_GND8047885_ACGAGGACAGGGATTG	2135	FCA_GND8047885	F81	female	CD45-	0.00220611	6346	0.0841813	0.0614786	1	8.8	N	1	Supporting	Supp_sKITLG
FCA_GND8047885_ACGAGGAGTAAGTGTA	2003	FCA_GND8047885	F81	female	CD45-	0.0201431	5312	0.12093	0.104762	1	8.8	N	1	Supporting	Supp_preGC_IIa
FCA_GND8047885_ACGAGGAGTAGAAGGA	1909	FCA_GND8047885	F81	female	CD45-	0.0687356	3899	0.183099	0.15983	1	8.8	N	1	Supporting	Supp_preGC_I
FCA_GND8047885_ACGAGGAGTAGCGTAG	1634	FCA_GND8047885	F81	female	CD45-	0.0650382	3275	0.165217	0.140645	1	8.8	N	1	Supporting	Supp_preGC_I
FCA_GND8047885_ACGAGGAGTCCGTTAA	3438	FCA_GND8047885	F81	female	CD45-	0.0384378	9704	0.238462	0.211909	1	8.8	N	1	Supporting	Supp_preGC_I
FCA_GND8047885_ACGAGGATCAGTGTTG	1727	FCA_GND8047885	F81	female	CD45-	0.0876103	3059	0.0568862	0.0888252	1	8.8	N	1	Supporting	Supp_preGC_I
FCA_GND8047885_ACGAGGATCTCGCTTG	1282	FCA_GND8047885	F81	female	CD45-	0.00998279	2905	0.0113482	0.0480507	1	8.8	N	1	Supporting	Supp_preGC_IIa
FCA_GND8047885_ACGATACAGATCTGAA	1399	FCA_GND8047885	F81	female	CD45-	0.028169	3266	0.0324867	0.0554324	1	8.8	N	0	Mesenchymal_GATA2_NR2F1	Mesen_dorsalMesentery
FCA_GND8047885_ACGATACAGGGTTTCT	2141	FCA_GND8047885	F81	female	CD45-	0.0240358	5367	0.136364	0.0963855	1	8.8	N	1	Supporting	Supp_preGC_IIa
FCA_GND8047885_ACGATACAGTACGTAA	2524	FCA_GND8047885	F81	female	CD45-	0.0509791	5924	0.154696	0.114094	1	8.8	N	1	Supporting	Supp_preGC_IIb
FCA_GND8047885_ACGATACCAACACGCC	2245	FCA_GND8047885	F81	female	CD45-	0.0450892	5101	0.176829	0.109313	1	8.8	N	1	Supporting	Supp_preGC_I
FCA_GND8047885_ACGATACCACTACAGT	1808	FCA_GND8047885	F81	female	CD45-	0.0131417	4870	0.0415584	0.0647482	1	8.8	N	5	Coel Epi	Supp_coelEpi
FCA_GND8047885_ACGATACCAGCTGTGC	2115	FCA_GND8047885	F81	female	CD45-	0.0640045	5359	0.0937808	0.075718	1	8.8	N	1	Supporting	Supp_preGC_I
FCA_GND8047885_ACGATACGTCTGGTCG	2283	FCA_GND8047885	F81	female	CD45-	0.0374644	6673	0.0461957	0.110867	1	8.8	N	1	Supporting	Supp_preGC_IIa
FCA_GND8047885_ACGATACTCGAGCCCA	2409	FCA_GND8047885	F81	female	CD45-	0.0698904	5294	0.0841813	0.12093	1	8.8	N	1	Supporting	Supp_preGC_I
FCA_GND8047885_ACGATACTCGGTCTAA	2812	FCA_GND8047885	F81	female	CD45-	0.0227726	7026	0.140645	0.114094	1	8.8	N	1	Supporting	Supp_preGC_IIa
FCA_GND8047885_ACGATACTCGTAGGTT	1672	FCA_GND8047885	F81	female	CD45-	0.0432487	3977	0.0415584	0.0334129	1	8.8	N	0	Mesenchymal_GATA2_NR2F1	Mesen_dorsalMesentery
FCA_GND8047885_ACGATGTAGCAGACTG	1601	FCA_GND8047885	F81	female	CD45-	0.0391877	2807	0.0864662	0.15983	1	8.8	N	1	Supporting	Supp_sLGR5_female
FCA_GND8047885_ACGATGTAGGAATTAC	2186	FCA_GND8047885	F81	female	CD45-	0.060154	4156	0.149798	0.126442	1	8.8	N	1	Supporting	Supp_preGC_I
FCA_GND8047885_ACGATGTAGGGAGTAA	2317	FCA_GND8047885	F81	female	CD45-	0.0454899	5144	0.43038	0.109313	1	8.8	N	1	Supporting	Supp_sKITLG
FCA_GND8047885_ACGATGTCAAACGCGA	1972	FCA_GND8047885	F81	female	CD45-	0.0213033	4788	0.0718512	0.0614786	1	8.8	N	2	Mesenchymal_LHX9_ARX	Mesen_ovarianStroma
FCA_GND8047885_ACGATGTCATAACCTG	2407	FCA_GND8047885	F81	female	CD45-	0.0691569	4685	0.0819672	0.112481	1	8.8	N	1	Supporting	Supp_preGC_I
FCA_GND8047885_ACGATGTGTCGAGTTT	2384	FCA_GND8047885	F81	female	CD45-	0.0412958	5618	0.0798206	0.101871	1	8.8	N	1	Supporting	Supp_preGC_I
FCA_GND8047885_ACGATGTGTCTCGTTC	1504	FCA_GND8047885	F81	female	CD45-	0.0270753	3361	0.0841813	0.07	1	8.8	N	2	Mesenchymal_LHX9_ARX	Mesen_testisStroma
FCA_GND8047885_ACGATGTGTGATAAAC	2060	FCA_GND8047885	F81	female	CD45-	0.05185	3973	0.0315789	0.0526316	1	8.8	N	1	Supporting	Supp_preGC_I
FCA_GND8047885_ACGATGTGTTCCACAA	2971	FCA_GND8047885	F81	female	CD45-	0.0582388	7143	0.0798206	0.0900437	1	8.8	N	1	Supporting	Supp_preGC_I
FCA_GND8047885_ACGCAGCAGACCCACC	2007	FCA_GND8047885	F81	female	CD45-	0.0660793	3859	0.183099	0.104762	1	8.8	N	1	Supporting	Supp_preGC_I
FCA_GND8047885_ACGCAGCAGCGATATA	1686	FCA_GND8047885	F81	female	CD45-	0.0488118	3114	0.034358	0.0554324	1	8.8	N	1	Supporting	Supp_preGC_I
FCA_GND8047885_ACGCAGCAGGACCACA	3451	FCA_GND8047885	F81	female	CD45-	0.0238043	9200	0.61039	0.109313	1	8.8	N	1	Supporting	Supp_preGC_I
FCA_GND8047885_ACGCAGCAGGGTATCG	2175	FCA_GND8047885	F81	female	CD45-	0.0477589	5109	0.12093	0.114094	1	8.8	N	1	Supporting	Supp_preGC_IIb
FCA_GND8047885_ACGCAGCCAACGCACC	2041	FCA_GND8047885	F81	female	CD45-	0.0388153	4457	0.0289608	0.0554324	1	8.8	N	1	Supporting	Supp_preGC_I
FCA_GND8047885_ACGCAGCCAAGTTGTC	2259	FCA_GND8047885	F81	female	CD45-	0.0280525	6167	0.104762	0.0647482	1	8.8	N	5	Coel Epi	Supp_coelEpi
FCA_GND8047885_ACGCAGCCACGAAATA	2078	FCA_GND8047885	F81	female	CD45-	0.0691339	3891	0.0990807	0.140645	1	8.8	N	1	Supporting	Supp_preGC_I
FCA_GND8047885_ACGCAGCCAGCCTGTG	2183	FCA_GND8047885	F81	female	CD45-	0.0314319	6013	0.107759	0.0963855	1	8.8	N	7	Endothelial	Endothelial
FCA_GND8047885_ACGCAGCCATCCCACT	1930	FCA_GND8047885	F81	female	CD45-	0.0232517	5720	0.0583776	0.0404624	1	8.8	N	0	Mesenchymal_GATA2_NR2F1	Mesen_testisStroma
FCA_GND8047885_ACGCAGCCATGGGAAC	1531	FCA_GND8047885	F81	female	CD45-	0.0450674	2818	0.0499648	0.0512821	1	8.8	N	5	Coel Epi	Supp_ovarianSurf
FCA_GND8047885_ACGCAGCCATTGAGCT	2846	FCA_GND8047885	F81	female	CD45-	0.0165932	7714	0.114094	0.128329	1	8.8	N	1	Supporting	Supp_preGC_IIb
FCA_GND8047885_ACGCAGCCATTGGCGC	2131	FCA_GND8047885	F81	female	CD45-	0.0440519	4472	0.0912621	0.0526316	1	8.8	N	1	Supporting	Supp_preGC_I
FCA_GND8047885_ACGCAGCGTAAAGTCA	2783	FCA_GND8047885	F81	female	CD45-	0.0398044	7361	0.220217	0.110867	1	8.8	N	1	Supporting	Supp_preGC_IIb
FCA_GND8047885_ACGCAGCGTATAATGG	2755	FCA_GND8047885	F81	female	CD45-	0.0232205	7235	0.0256971	0.0298165	1	8.8	N	5	Coel Epi	Supp_ovarianSurf
FCA_GND8047885_ACGCAGCGTATGAAAC	4357	FCA_GND8047885	F81	female	CD45-	0.0207593	12669	0.114094	0.114094	1	8.8	N	1	Supporting	Supp_preGC_IIb
FCA_GND8047885_ACGCAGCGTTACGACT	2490	FCA_GND8047885	F81	female	CD45-	0.0163357	7101	0.0963855	0.0963855	1	8.8	N	1	Supporting	Supp_preGC_IIb
FCA_GND8047885_ACGCAGCGTTCCACAA	1959	FCA_GND8047885	F81	female	CD45-	0.0471497	3754	0.0647482	0.104762	1	8.8	N	1	Supporting	Supp_preGC_I
FCA_GND8047885_ACGCAGCGTTCGTTGA	1910	FCA_GND8047885	F81	female	CD45-	0.0647249	4326	0.0664506	0.0664506	1	8.8	N	1	Supporting	Supp_sLGR5_female
FCA_GND8047885_ACGCAGCTCCTGTAGA	2181	FCA_GND8047885	F81	female	CD45-	0.0441007	6077	0.0512821	0.114094	1	8.8	N	1	Supporting	Supp_preGC_IIa
FCA_GND8047885_ACGCAGCTCCTTGCCA	2258	FCA_GND8047885	F81	female	CD45-	0.0764149	4541	0.0777385	0.0664506	1	8.8	N	1	Supporting	Supp_sLGR5_female
FCA_GND8047885_ACGCAGCTCTCTAAGG	2881	FCA_GND8047885	F81	female	CD45-	0.076042	6286	0.0912621	0.126442	1	8.8	N	1	Supporting	Supp_preGC_I
FCA_GND8047885_ACGCAGCTCTGCAGTA	1799	FCA_GND8047885	F81	female	CD45-	0.0468918	3732	0.296552	0.0737564	1	8.8	N	1	Supporting	Supp_preGC_IIa
FCA_GND8047885_ACGCAGCTCTGGTTCC	4382	FCA_GND8047885	F81	female	CD45-	0.0295105	16977	0.43038	0.43038	0	8.8	N	7	Endothelial	Endothelial
FCA_GND8047885_ACGCCAGAGATGCCAG	2780	FCA_GND8047885	F81	female	CD45-	0.0397894	6459	0.22905	0.15983	1	8.8	N	1	Supporting	Supp_preGC_IIb
FCA_GND8047885_ACGCCAGAGCTGAAAT	2566	FCA_GND8047885	F81	female	CD45-	0.067306	5527	0.170877	0.11577	1	8.8	N	1	Supporting	Supp_preGC_I
FCA_GND8047885_ACGCCAGAGGAGTTGC	2992	FCA_GND8047885	F81	female	CD45-	0.0568985	8770	0.0499648	0.0647482	1	8.8	N	0	Mesenchymal_GATA2_NR2F1	Mesenchymal_GATA2_NR2F1
FCA_GND8047885_ACGCCAGAGGTGATAT	2009	FCA_GND8047885	F81	female	CD45-	0.0544838	3836	0.140645	0.0888252	1	8.8	N	1	Supporting	Supp_preGC_I
FCA_GND8047885_ACGCCAGAGTAAGTAC	1763	FCA_GND8047885	F81	female	CD45-	0.0350392	4338	0.0499648	0.0334129	1	8.8	N	0	Mesenchymal_GATA2_NR2F1	Mesen_dorsalMesentery
FCA_GND8047885_ACGCCAGGTAAGAGAG	2486	FCA_GND8047885	F81	female	CD45-	0.00337952	5918	0.0298165	0.0474372	1	8.8	N	1	Supporting	Supp_preGC_IIb
FCA_GND8047885_ACGCCAGGTCCGTGAC	2176	FCA_GND8047885	F81	female	CD45-	0.0698663	4938	0.154696	0.140645	1	8.8	N	1	Supporting	Supp_preGC_I
FCA_GND8047885_ACGCCAGTCATTTGGG	1688	FCA_GND8047885	F81	female	CD45-	0.0144033	3888	0.07	0.0554324	1	8.8	N	2	Mesenchymal_LHX9_ARX	Mesen_dorsalMesentery
FCA_GND8047885_ACGCCAGTCCTTTACA	2793	FCA_GND8047885	F81	female	CD45-	0.0470885	6732	0.362398	0.211909	1	8.8	N	1	Supporting	Supp_preGC_I
FCA_GND8047885_ACGCCAGTCGTCTGCT	2529	FCA_GND8047885	F81	female	CD45-	0.0268275	5554	0.0912621	0.0900437	1	8.8	N	1	Supporting	Supp_preGC_IIb
FCA_GND8047885_ACGCCAGTCTGCTGCT	2718	FCA_GND8047885	F81	female	CD45-	0.0165675	8571	0.0426789	0.0614786	1	8.8	N	2	Mesenchymal_LHX9_ARX	Mesen_ovarianStroma
FCA_GND8047885_ACGCCGAAGGTGCTAG	1553	FCA_GND8047885	F81	female	CD45-	0.0273702	3544	0.0438247	0.0554324	1	8.8	N	2	Mesenchymal_LHX9_ARX	Mesen_dorsalMesentery
FCA_GND8047885_ACGCCGACAAAGTCAA	2475	FCA_GND8047885	F81	female	CD45-	0.00299043	6688	0.0272981	0.0415584	1	8.8	N	1	Supporting	Supp_preGC_IIb
FCA_GND8047885_ACGCCGACAGCCTTGG	2273	FCA_GND8047885	F81	female	CD45-	0.0313491	5678	0.165217	0.128329	1	8.8	N	5	Coel Epi	Supp_ovarianSurf
FCA_GND8047885_ACGCCGACAGTTCCCT	2684	FCA_GND8047885	F81	female	CD45-	0.0495549	6740	0.0888252	0.0900437	1	8.8	N	1	Supporting	Supp_preGC_I
FCA_GND8047885_ACGCCGAGTCCAACTA	2554	FCA_GND8047885	F81	female	CD45-	0.0208181	6821	0.0554324	0.0647482	1	8.8	N	0	Mesenchymal_GATA2_NR2F1	Mesenchymal_GATA2_NR2F1
FCA_GND8047885_ACGCCGAGTCCCGACA	2386	FCA_GND8047885	F81	female	CD45-	0.00935985	5983	0.0526316	0.0614786	1	8.8	N	1	Supporting	Supp_preGC_IIb
FCA_GND8047885_ACGCCGAGTCTTCTCG	1956	FCA_GND8047885	F81	female	CD45-	0.06731	4145	0.0718512	0.112481	1	8.8	N	1	Supporting	Supp_preGC_I
FCA_GND8047885_ACGCCGAGTGACTCAT	2165	FCA_GND8047885	F81	female	CD45-	0.019544	5833	0.0383407	0.0512821	1	8.8	N	5	Coel Epi	Supp_ovarianSurf
FCA_GND8047885_ACGCCGAGTTGCGTTA	2035	FCA_GND8047885	F81	female	CD45-	0.0305203	5439	0.0404624	0.0777385	1	8.8	N	5	Coel Epi	Supp_ovarianSurf
FCA_GND8047885_ACGCCGAGTTGTACAC	2041	FCA_GND8047885	F81	female	CD45-	0.0460865	5251	0.0912621	0.0547235	1	8.8	N	2	Mesenchymal_LHX9_ARX	Mesen_ovarianStroma
FCA_GND8047885_ACGCCGATCACCTCGT	1625	FCA_GND8047885	F81	female	CD45-	0.0800125	3212	0.0682005	0.0900437	1	8.8	N	1	Supporting	Supp_preGC_I
FCA_GND8047885_ACGCCGATCCAGTATG	2157	FCA_GND8047885	F81	female	CD45-	0.0237462	5264	0.165217	0.0664506	1	8.8	N	2	Mesenchymal_LHX9_ARX	Mesen_ovarianStroma
FCA_GND8047885_ACGCCGATCTCGCATC	2084	FCA_GND8047885	F81	female	CD45-	0.0284211	5700	0.0647482	0.075718	1	8.8	N	2	Mesenchymal_LHX9_ARX	Mesen_ovarianStroma
FCA_GND8047885_ACGGAGAAGAAGCCCA	1383	FCA_GND8047885	F81	female	CD45-	0.0464088	2715	0.034358	0.0599078	1	8.8	N	1	Supporting	Supp_preGC_I
FCA_GND8047885_ACGGAGAAGAATCTCC	2740	FCA_GND8047885	F81	female	CD45-	0.0336263	7167	0.0912621	0.212669	1	8.8	N	5	Coel Epi	Supp_ovarianSurf
FCA_GND8047885_ACGGAGAAGATACACA	1894	FCA_GND8047885	F81	female	CD45-	0.0444664	4048	0.0599078	0.0606932	1	8.8	N	5	Coel Epi	Supp_ovarianSurf
FCA_GND8047885_ACGGAGACATTTGCCC	1826	FCA_GND8047885	F81	female	CD45-	0.0227125	4623	0.0718512	0.0798206	1	8.8	N	1	Supporting	Supp_preGC_IIa
FCA_GND8047885_ACGGAGAGTAAATGTG	2448	FCA_GND8047885	F81	female	CD45-	0.00242204	6606	0.0540146	0.0737564	1	8.8	N	1	Supporting	Supp_preGC_IIa
FCA_GND8047885_ACGGAGAGTCAGCTAT	1703	FCA_GND8047885	F81	female	CD45-	0.0513138	3235	0.0526316	0.0554324	1	8.8	N	1	Supporting	Supp_preGC_I
FCA_GND8047885_ACGGAGAGTGCAACGA	2384	FCA_GND8047885	F81	female	CD45-	0.0123767	5979	0.136364	0.0480507	1	8.8	N	1	Supporting	Supp_preGC_IIa
FCA_GND8047885_ACGGAGAGTTCGGGCT	1477	FCA_GND8047885	F81	female	CD45-	0.0414306	2824	0.0198473	0.0599078	1	8.8	N	1	Supporting	Supp_preGC_I
FCA_GND8047885_ACGGAGAGTTGTACAC	1801	FCA_GND8047885	F81	female	CD45-	0.0747892	3677	0.0526316	0.0664506	1	8.8	N	1	Supporting	Supp_sLGR5_female
FCA_GND8047885_ACGGAGATCGCATGAT	1816	FCA_GND8047885	F81	female	CD45-	0.0395189	4656	0.0630915	0.0876457	1	8.8	N	0	Mesenchymal_GATA2_NR2F1	Mesen_ovarianStroma
FCA_GND8047885_ACGGAGATCGCGGATC	1584	FCA_GND8047885	F81	female	CD45-	0.0589828	3323	0.15983	0.0664506	1	8.8	N	1	Supporting	Supp_sLGR5_female
FCA_GND8047885_ACGGAGATCTGGCGTG	2036	FCA_GND8047885	F81	female	CD45-	0.0246833	4578	0.101871	0.0937808	1	8.8	N	0	Mesenchymal_GATA2_NR2F1	Mesenchymal_GATA2_NR2F1
FCA_GND8047885_ACGGCCAAGAGTAAGG	2710	FCA_GND8047885	F81	female	CD45-	0.0302048	5860	0.220217	0.107759	1	8.8	N	1	Supporting	Supp_sKITLG
FCA_GND8047885_ACGGCCAAGCCACTAT	2662	FCA_GND8047885	F81	female	CD45-	0.0417982	6651	0.0540146	0.0718512	1	8.8	N	0	Mesenchymal_GATA2_NR2F1	Mesenchymal_GATA2_NR2F1
FCA_GND8047885_ACGGCCAAGCTTATCG	2434	FCA_GND8047885	F81	female	CD45-	0.0493984	4737	0.132262	0.140645	1	8.8	N	1	Supporting	Supp_preGC_I
FCA_GND8047885_ACGGCCAAGGCTAGAC	1530	FCA_GND8047885	F81	female	CD45-	0.0187479	2987	0.0888252	0.0614786	1	8.8	N	1	Supporting	Supp_preGC_IIa
FCA_GND8047885_ACGGCCACACCACGTG	2260	FCA_GND8047885	F81	female	CD45-	0.0401485	4309	0.124555	0.112481	1	8.8	N	1	Supporting	Supp_sLGR5_female
FCA_GND8047885_ACGGCCACAGTCACTA	1858	FCA_GND8047885	F81	female	CD45-	0.0459662	4264	0.0888252	0.128329	1	8.8	N	5	Coel Epi	Supp_ovarianSurf
FCA_GND8047885_ACGGCCACAGTCAGAG	1554	FCA_GND8047885	F81	female	CD45-	0.0327548	3572	0.0130112	0.0499648	1	8.8	N	0	Mesenchymal_GATA2_NR2F1	Mesenchymal_GATA2_NR2F1
FCA_GND8047885_ACGGCCACATTCTCAT	2990	FCA_GND8047885	F81	female	CD45-	0.00741627	8360	0.110867	0.0808939	1	8.8	N	1	Supporting	Supp_preGC_IIb
FCA_GND8047885_ACGGCCAGTCCGAATT	2264	FCA_GND8047885	F81	female	CD45-	0.0473481	4393	0.0798206	0.0526316	1	8.8	N	1	Supporting	Supp_preGC_I
FCA_GND8047885_ACGGCCAGTGCCTGCA	1843	FCA_GND8047885	F81	female	CD45-	0.0331713	3497	0.132262	0.140645	1	8.8	N	1	Supporting	Supp_preGC_I
FCA_GND8047885_ACGGCCAGTGTGTGCC	2522	FCA_GND8047885	F81	female	CD45-	0.0242939	6833	0.0526316	0.0606932	1	8.8	N	5	Coel Epi	Supp_ovarianSurf
FCA_GND8047885_ACGGCCATCTCCAACC	2074	FCA_GND8047885	F81	female	CD45-	0.0434464	4097	0.149798	0.112481	1	8.8	N	1	Supporting	Supp_preGC_I
FCA_GND8047885_ACGGCCATCTTCCTTC	4062	FCA_GND8047885	F81	female	CD45-	0.0285462	11315	0.524528	0.211909	1	8.8	N	1	Supporting	Supp_preGC_I
FCA_GND8047885_ACGGGCTCACAACGCC	2991	FCA_GND8047885	F81	female	CD45-	0.0416821	8085	0.326683	0.211909	1	8.8	N	1	Supporting	Supp_preGC_I
FCA_GND8047885_ACGGGCTCACTGTCGG	2848	FCA_GND8047885	F81	female	CD45-	0.0182618	7502	0.176829	0.0937808	1	8.8	N	1	Supporting	Supp_preGC_IIb
FCA_GND8047885_ACGGGCTCAGTGACAG	2491	FCA_GND8047885	F81	female	CD45-	0.0143418	5090	0.170877	0.104762	1	8.8	N	1	Supporting	Supp_preGC_IIb
FCA_GND8047885_ACGGGCTCATCACGAT	1582	FCA_GND8047885	F81	female	CD45-	0.0273331	2561	0.0373134	0.112481	1	8.8	N	1	Supporting	Supp_preGC_I
FCA_GND8047885_ACGGGCTGTAATCGTC	2260	FCA_GND8047885	F81	female	CD45-	0.0779048	5250	0.0937808	0.0798206	1	8.8	N	1	Supporting	Supp_preGC_I
FCA_GND8047885_ACGGGCTGTACATGTC	2827	FCA_GND8047885	F81	female	CD45-	0.0049512	7069	0.0383407	0.0808939	1	8.8	N	1	Supporting	Supp_preGC_IIb
FCA_GND8047885_ACGGGCTGTCACTTCC	3263	FCA_GND8047885	F81	female	CD45-	0.0259767	9547	0.0737564	0.0480507	1	8.8	N	1	Supporting	Supp_preGC_IIb
FCA_GND8047885_ACGGGCTGTGTTGGGA	2279	FCA_GND8047885	F81	female	CD45-	0.0336748	7810	0.0256971	0.0606932	1	8.8	N	2	Mesenchymal_LHX9_ARX	Mesen_ovarianStroma
FCA_GND8047885_ACGGGCTGTGTTTGTG	1745	FCA_GND8047885	F81	female	CD45-	0.0264614	4157	0.0449966	0.0614786	1	8.8	N	2	Mesenchymal_LHX9_ARX	Mesen_ovarianStroma
FCA_GND8047885_ACGGGCTGTTCTGAAC	2247	FCA_GND8047885	F81	female	CD45-	0.0308688	5410	0.0249187	0.0130112	1	8.8	N	0	Mesenchymal_GATA2_NR2F1	Mesenchymal_GATA2_NR2F1
FCA_GND8047885_ACGGGCTTCCACTCCA	1852	FCA_GND8047885	F81	female	CD45-	0.0632048	3370	0.0415584	0.0554324	1	8.8	N	1	Supporting	Supp_preGC_I
FCA_GND8047885_ACGGGCTTCCGTAGGC	2347	FCA_GND8047885	F81	female	CD45-	0.0243136	6046	0.104762	0.104762	1	8.8	N	1	Supporting	Supp_preGC_IIa
FCA_GND8047885_ACGGGCTTCCTCAACC	2532	FCA_GND8047885	F81	female	CD45-	0.0424276	5421	0.110867	0.0798206	1	8.8	N	1	Supporting	Supp_preGC_I
FCA_GND8047885_ACGGGCTTCGGATGTT	2234	FCA_GND8047885	F81	female	CD45-	0.0270124	5553	0.0554324	0.109313	1	8.8	N	2	Mesenchymal_LHX9_ARX	Mesen_ovarianStroma
FCA_GND8047885_ACGGGTCAGACTAGAT	2079	FCA_GND8047885	F81	female	CD45-	0.0334613	5469	0.0486787	0.0272981	1	8.8	N	0	Mesenchymal_GATA2_NR2F1	Mesen_dorsalMesentery
FCA_GND8047885_ACGGGTCAGGCTACGA	2614	FCA_GND8047885	F81	female	CD45-	0.0450233	5797	0.0415584	0.104762	1	8.8	N	1	Supporting	Supp_preGC_I
FCA_GND8047885_ACGGGTCCAAGTAGTA	2312	FCA_GND8047885	F81	female	CD45-	0.0374297	4622	0.101871	0.0841813	1	8.8	N	1	Supporting	Supp_sLGR5_female
FCA_GND8047885_ACGGGTCCAATGGAAT	3509	FCA_GND8047885	F81	female	CD45-	0.036957	8794	0.0554324	0.114094	1	8.8	N	1	Supporting	Supp_preGC_IIb
FCA_GND8047885_ACGGGTCCACTTAAGC	2261	FCA_GND8047885	F81	female	CD45-	0.0383955	4662	0.382857	0.15983	1	8.8	N	1	Supporting	Supp_preGC_I
FCA_GND8047885_ACGGGTCCAGGCTCAC	2105	FCA_GND8047885	F81	female	CD45-	0.0266553	5890	0.0819672	0.0554324	1	8.8	N	2	Mesenchymal_LHX9_ARX	Mesen_dorsalMesentery
FCA_GND8047885_ACGGGTCGTAACGTTC	1279	FCA_GND8047885	F81	female	CD45-	0.0216289	2959	0.0526316	0.0554324	1	8.8	N	2	Mesenchymal_LHX9_ARX	Mesen_dorsalMesentery
FCA_GND8047885_ACGGGTCGTCACTGGC	1786	FCA_GND8047885	F81	female	CD45-	0.0191596	4593	0.0449966	0.0272981	1	8.8	N	0	Mesenchymal_GATA2_NR2F1	Mesen_dorsalMesentery
FCA_GND8047885_ACGGGTCGTCTGCAAT	2293	FCA_GND8047885	F81	female	CD45-	0.0593117	4940	0.0798206	0.101871	1	8.8	N	1	Supporting	Supp_preGC_I
FCA_GND8047885_ACGGGTCGTTGGTTTG	1752	FCA_GND8047885	F81	female	CD45-	0.0627943	3185	0.0499648	0.0554324	1	8.8	N	1	Supporting	Supp_preGC_I
FCA_GND8047885_ACGGGTCTCAATCTCT	2210	FCA_GND8047885	F81	female	CD45-	0.0386918	4342	0.128329	0.0798206	1	8.8	N	1	Supporting	Supp_preGC_I
FCA_GND8047885_ACGGGTCTCCAAGTAC	2831	FCA_GND8047885	F81	female	CD45-	0.0396365	6383	0.101871	0.211909	1	8.8	N	1	Supporting	Supp_preGC_IIb
FCA_GND8047885_ACGGGTCTCTCCTATA	2529	FCA_GND8047885	F81	female	CD45-	0.05565	6469	0.0599078	0.0900437	1	8.8	N	1	Supporting	Supp_preGC_IIa
FCA_GND8047885_ACGGGTCTCTGTCAAG	1746	FCA_GND8047885	F81	female	CD45-	0.0564907	3505	0.0864662	0.0777385	1	8.8	N	1	Supporting	Supp_preGC_I
FCA_GND8047885_ACGTCAAAGACAAAGG	2195	FCA_GND8047885	F81	female	CD45-	0.0640747	4604	0.0937808	0.104762	1	8.8	N	1	Supporting	Supp_preGC_I
FCA_GND8047885_ACGTCAAAGCCTCGTG	1550	FCA_GND8047885	F81	female	CD45-	0.0412311	3444	0.0526316	0.0599078	1	8.8	N	1	Supporting	Supp_preGC_I
FCA_GND8047885_ACGTCAAAGCGATGAC	2163	FCA_GND8047885	F81	female	CD45-	0.0775299	4437	0.114094	0.0664506	1	8.8	N	1	Supporting	Supp_sLGR5_female
FCA_GND8047885_ACGTCAAAGGAACTGC	2793	FCA_GND8047885	F81	female	CD45-	0.0312433	9282	0.128329	0.128329	1	8.8	N	0	Mesenchymal_GATA2_NR2F1	Mesenchymal_GATA2_NR2F1
FCA_GND8047885_ACGTCAAAGGAATCGC	1712	FCA_GND8047885	F81	female	CD45-	0.0572068	3129	0.0404624	0.0526316	1	8.8	N	1	Supporting	Supp_preGC_I
FCA_GND8047885_ACGTCAACAAAGCAAT	2560	FCA_GND8047885	F81	female	CD45-	0.0731	5171	0.149798	0.11577	1	8.8	N	1	Supporting	Supp_sLGR5_female
FCA_GND8047885_ACGTCAACACCGTTGG	2632	FCA_GND8047885	F81	female	CD45-	0.00482809	6835	0.0798206	0.110867	1	8.8	N	1	Supporting	Supp_preGC_IIb
FCA_GND8047885_ACGTCAACACGGCTAC	1972	FCA_GND8047885	F81	female	CD45-	0.0166017	5903	0.07	0.0798206	1	8.8	N	1	Supporting	Supp_preGC_IIa
FCA_GND8047885_ACGTCAACACGGTTTA	2459	FCA_GND8047885	F81	female	CD45-	0.042911	6362	0.259259	0.0798206	1	8.8	N	1	Supporting	Supp_preGC_IIa
FCA_GND8047885_ACGTCAACAGCCAGAA	1854	FCA_GND8047885	F81	female	CD45-	0.0241592	4222	0.0540146	0.0614786	1	8.8	N	1	Supporting	Supp_preGC_IIa
FCA_GND8047885_ACGTCAACAGGGAGAG	1392	FCA_GND8047885	F81	female	CD45-	0.0595374	2637	0.0486787	0.0599078	1	8.8	N	1	Supporting	Supp_preGC_I
FCA_GND8047885_ACGTCAACATGGAATA	1802	FCA_GND8047885	F81	female	CD45-	0.0560241	3320	0.0438247	0.0526316	1	8.8	N	1	Supporting	Supp_preGC_I
FCA_GND8047885_ACGTCAACATTGTGCA	2065	FCA_GND8047885	F81	female	CD45-	0.0532714	4524	0.283186	0.211909	1	8.8	N	1	Supporting	Supp_preGC_IIc
FCA_GND8047885_ACGTCAAGTACCAGTT	1200	FCA_GND8047885	F81	female	CD45-	0.0963908	2272	0.128329	0.140645	1	8.8	N	1	Supporting	Supp_preGC_I
FCA_GND8047885_ACGTCAAGTTAAGTAG	1910	FCA_GND8047885	F81	female	CD45-	0.0608049	4572	0.132262	0.114094	1	8.8	N	1	Supporting	Supp_preGC_IIa
FCA_GND8047885_ACGTCAATCAAGAAGT	2189	FCA_GND8047885	F81	female	CD45-	0.0415409	5633	0.12093	0.0526316	1	8.8	N	2	Mesenchymal_LHX9_ARX	Mesen_ovarianStroma
FCA_GND8047885_ACGTCAATCCTACAGA	2030	FCA_GND8047885	F81	female	CD45-	0.0423366	5598	0.0777385	0.075718	1	8.8	N	2	Mesenchymal_LHX9_ARX	Mesen_ovarianStroma
FCA_GND8047885_ACGTCAATCGCTTAGA	1856	FCA_GND8047885	F81	female	CD45-	0.0351282	3900	0.524528	0.147458	1	8.8	N	1	Supporting	Supp_sKITLG
FCA_GND8047885_ACTATCTCAATGGTCT	2791	FCA_GND8047885	F81	female	CD45-	0.0164683	7226	0.405405	0.0647482	1	8.8	N	5	Coel Epi	Supp_coelEpi
FCA_GND8047885_ACTATCTCACACAGAG	1941	FCA_GND8047885	F81	female	CD45-	0.0442046	3891	0.0888252	0.0798206	1	8.8	N	1	Supporting	Supp_preGC_I
FCA_GND8047885_ACTATCTCATCACGTA	2438	FCA_GND8047885	F81	female	CD45-	0.0628826	5391	0.0777385	0.0900437	1	8.8	N	1	Supporting	Supp_preGC_IIa
FCA_GND8047885_ACTATCTCATGACATC	4549	FCA_GND8047885	F81	female	CD45-	0.0303429	16709	0.101871	0.0647482	1	8.8	N	0	Mesenchymal_GATA2_NR2F1	Mesenchymal_GATA2_NR2F1
FCA_GND8047885_ACTATCTGTAGTGAAT	1849	FCA_GND8047885	F81	female	CD45-	0.0407509	4368	0.0937808	0.075718	1	8.8	N	2	Mesenchymal_LHX9_ARX	Mesen_ovarianStroma
FCA_GND8047885_ACTATCTGTGCGATAG	3023	FCA_GND8047885	F81	female	CD45-	0.0116505	8755	0.0963855	0.0410827	1	8.8	N	1	Supporting	Supp_preGC_IIb
FCA_GND8047885_ACTATCTGTTCAGCGC	2523	FCA_GND8047885	F81	female	CD45-	0.0734963	6218	0.0540146	0.104762	1	8.8	N	1	Supporting	Supp_preGC_IIb
FCA_GND8047885_ACTATCTTCATGTAGC	2577	FCA_GND8047885	F81	female	CD45-	0.0198901	7642	0.204082	0.165217	1	8.8	N	7	Endothelial	Endothelial
FCA_GND8047885_ACTATCTTCTCTAAGG	2342	FCA_GND8047885	F81	female	CD45-	0.0452571	4375	0.165217	0.104762	1	8.8	N	1	Supporting	Supp_sLGR5_female
FCA_GND8047885_ACTATCTTCTGCAGTA	3565	FCA_GND8047885	F81	female	CD45-	0.0444225	10130	0.458194	0.0841813	1	8.8	N	1	Supporting	Supp_preGC_I
FCA_GND8047885_ACTGAACAGCAGGCTA	2127	FCA_GND8047885	F81	female	CD45-	0.0447381	4314	0.0963855	0.0777385	1	8.8	N	1	Supporting	Supp_preGC_I
FCA_GND8047885_ACTGAACCAATGGAAT	2243	FCA_GND8047885	F81	female	CD45-	0.0593649	4346	0.101871	0.104762	1	8.8	N	1	Supporting	Supp_preGC_I
FCA_GND8047885_ACTGAACCACGGCCAT	2433	FCA_GND8047885	F81	female	CD45-	0.0102556	6143	0.0449966	0.0937808	1	8.8	N	1	Supporting	Supp_preGC_IIb
FCA_GND8047885_ACTGAACCATGAGCGA	2234	FCA_GND8047885	F81	female	CD45-	0.0279399	5655	0.15983	0.128329	1	8.8	N	5	Coel Epi	Supp_ovarianSurf
FCA_GND8047885_ACTGAACGTACTTAGC	3086	FCA_GND8047885	F81	female	CD45-	0.0470918	7496	0.0990807	0.0900437	1	8.8	N	1	Supporting	Supp_preGC_I
FCA_GND8047885_ACTGAACGTGGACGAT	2589	FCA_GND8047885	F81	female	CD45-	0.0406932	6463	0.107759	0.114094	1	8.8	N	1	Supporting	Supp_preGC_IIb
FCA_GND8047885_ACTGAACGTGGCGAAT	2478	FCA_GND8047885	F81	female	CD45-	0.0386088	6268	0.382857	0.128329	1	8.8	N	1	Supporting	Supp_preGC_IIb
FCA_GND8047885_ACTGAACTCAAACCGT	2782	FCA_GND8047885	F81	female	CD45-	0.063109	6465	0.149798	0.126442	1	8.8	N	1	Supporting	Supp_preGC_I
FCA_GND8047885_ACTGAACTCAGAGGTG	1852	FCA_GND8047885	F81	female	CD45-	0.0294979	4780	0.0614786	0.0647482	1	8.8	N	5	Coel Epi	Supp_coelEpi
FCA_GND8047885_ACTGAACTCGAGAGCA	2480	FCA_GND8047885	F81	female	CD45-	0.0638381	5138	0.149798	0.104762	1	8.8	N	1	Supporting	Supp_preGC_I
FCA_GND8047885_ACTGAACTCTACCTGC	2367	FCA_GND8047885	F81	female	CD45-	0.0632986	5087	0.124555	0.109313	1	8.8	N	1	Supporting	Supp_preGC_I
FCA_GND8047885_ACTGAGTAGAGTGAGA	2660	FCA_GND8047885	F81	female	CD45-	0.0492312	6439	0.075718	0.0900437	1	8.8	N	1	Supporting	Supp_preGC_IIc
FCA_GND8047885_ACTGAGTAGGCCGAAT	1929	FCA_GND8047885	F81	female	CD45-	0.075186	3764	0.0990807	0.109313	1	8.8	N	1	Supporting	Supp_preGC_I
FCA_GND8047885_ACTGAGTCAGCTCCGA	1898	FCA_GND8047885	F81	female	CD45-	0.00972806	4523	0.0614786	0.0474372	1	8.8	N	1	Supporting	Supp_preGC_IIb
FCA_GND8047885_ACTGAGTCATCCTTGC	2101	FCA_GND8047885	F81	female	CD45-	0.0418836	4417	0.211909	0.109313	1	8.8	N	1	Supporting	Supp_preGC_I
FCA_GND8047885_ACTGAGTGTAAGTTCC	2304	FCA_GND8047885	F81	female	CD45-	0.0695956	5144	0.104762	0.12093	1	8.8	N	1	Supporting	Supp_preGC_I
FCA_GND8047885_ACTGAGTGTACTCGCG	1506	FCA_GND8047885	F81	female	CD45-	0.0223058	3721	0.0289608	0.0272981	1	8.8	N	0	Mesenchymal_GATA2_NR2F1	Mesen_dorsalMesentery
FCA_GND8047885_ACTGAGTGTCTAACGT	2019	FCA_GND8047885	F81	female	CD45-	0.0167577	5311	0.0526316	0.0682005	1	8.8	N	1	Supporting	Supp_preGC_IIa
FCA_GND8047885_ACTGAGTGTTCGGGCT	1910	FCA_GND8047885	F81	female	CD45-	0.0427293	4470	0.107759	0.0798206	1	8.8	N	1	Supporting	Supp_preGC_IIa
FCA_GND8047885_ACTGAGTTCACAAACC	2524	FCA_GND8047885	F81	female	CD45-	0.0571999	5507	0.0819672	0.109313	1	8.8	N	1	Supporting	Supp_sLGR5_female
FCA_GND8047885_ACTGAGTTCAGGCAAG	1813	FCA_GND8047885	F81	female	CD45-	0.00467377	5349	0.0256971	0.0614786	1	8.8	N	1	Supporting	Supp_preGC_IIa
FCA_GND8047885_ACTGAGTTCATCACCC	1689	FCA_GND8047885	F81	female	CD45-	0.0252294	4796	0.0682005	0.075718	1	8.8	N	2	Mesenchymal_LHX9_ARX	Mesen_testisStroma
FCA_GND8047885_ACTGAGTTCATCGATG	2143	FCA_GND8047885	F81	female	CD45-	0.0282655	5696	0.0888252	0.0950832	1	8.8	N	7	Endothelial	Endothelial
FCA_GND8047885_ACTGAGTTCCCTAATT	1910	FCA_GND8047885	F81	female	CD45-	0.0265246	4788	0.110867	0.0718512	1	8.8	N	2	Mesenchymal_LHX9_ARX	Mesen_ovarianStroma
FCA_GND8047885_ACTGAGTTCGGAGGTA	1623	FCA_GND8047885	F81	female	CD45-	0.0272394	3818	0.0841813	0.0777385	1	8.8	N	5	Coel Epi	Supp_ovarianSurf
FCA_GND8047885_ACTGATGAGCTGTTCA	2119	FCA_GND8047885	F81	female	CD45-	0.0615879	4043	0.0718512	0.0798206	1	8.8	N	1	Supporting	Supp_preGC_I
FCA_GND8047885_ACTGATGCAAGCCGTC	1582	FCA_GND8047885	F81	female	CD45-	0.0876891	2908	0.149798	0.110867	1	8.8	N	1	Supporting	Supp_preGC_I
FCA_GND8047885_ACTGATGCAAGCGAGT	2129	FCA_GND8047885	F81	female	CD45-	0.0644783	4265	0.189711	0.104762	1	8.8	N	1	Supporting	Supp_preGC_I
FCA_GND8047885_ACTGATGCAAGCGCTC	1836	FCA_GND8047885	F81	female	CD45-	0.0761094	3876	0.0614786	0.0554324	1	8.8	N	1	Supporting	Supp_preGC_I
FCA_GND8047885_ACTGATGCACACAGAG	2187	FCA_GND8047885	F81	female	CD45-	0.0714286	4410	0.0486787	0.109313	1	8.8	N	1	Supporting	Supp_sLGR5_female
FCA_GND8047885_ACTGATGGTACGCACC	2281	FCA_GND8047885	F81	female	CD45-	0.0710963	4515	0.145119	0.11577	1	8.8	N	1	Supporting	Supp_preGC_I
FCA_GND8047885_ACTGATGGTTGGTAAA	2538	FCA_GND8047885	F81	female	CD45-	0.0232558	7052	0.0819672	0.0614786	1	8.8	N	2	Mesenchymal_LHX9_ARX	Mesen_ovarianStroma
FCA_GND8047885_ACTGATGTCCACGTTC	2066	FCA_GND8047885	F81	female	CD45-	0.0191513	4595	0.204082	0.110867	1	8.8	N	1	Supporting	Supp_preGC_IIa
FCA_GND8047885_ACTGATGTCGGTGTTA	2263	FCA_GND8047885	F81	female	CD45-	0.0346327	6901	0.0798206	0.0876457	1	8.8	N	2	Mesenchymal_LHX9_ARX	Mesen_ovarianStroma
FCA_GND8047885_ACTGATGTCTGAAAGA	1654	FCA_GND8047885	F81	female	CD45-	0.0619061	3683	0.0486787	0.0526316	1	8.8	N	2	Mesenchymal_LHX9_ARX	Mesen_ovarianStroma
FCA_GND8047885_ACTGCTCAGAGCTATA	2481	FCA_GND8047885	F81	female	CD45-	0.0512873	4855	0.0798206	0.112481	1	8.8	N	1	Supporting	Supp_preGC_I
FCA_GND8047885_ACTGCTCAGAGGACGG	2421	FCA_GND8047885	F81	female	CD45-	0.0199776	7158	0.0718512	0.07	1	8.8	N	2	Mesenchymal_LHX9_ARX	Mesen_ovarianStroma
FCA_GND8047885_ACTGCTCAGATCCTGT	2815	FCA_GND8047885	F81	female	CD45-	0.0741165	6112	0.114094	0.126442	1	8.8	N	1	Supporting	Supp_preGC_I
FCA_GND8047885_ACTGCTCAGCGTTCCG	1860	FCA_GND8047885	F81	female	CD45-	0.0377784	3547	0.140645	0.140645	1	8.8	N	1	Supporting	Supp_preGC_I
FCA_GND8047885_ACTGCTCAGTCTCAAC	1932	FCA_GND8047885	F81	female	CD45-	0.0152213	4993	0.0819672	0.0554324	1	8.8	N	2	Mesenchymal_LHX9_ARX	Mesen_testisStroma
FCA_GND8047885_ACTGCTCAGTGTACCT	2461	FCA_GND8047885	F81	female	CD45-	0.0421933	5380	0.0912621	0.0900437	1	8.8	N	1	Supporting	Supp_preGC_IIc
FCA_GND8047885_ACTGCTCCAATAAGCA	2643	FCA_GND8047885	F81	female	CD45-	0.0121744	6489	0.0841813	0.07	1	8.8	N	1	Supporting	Supp_preGC_IIb
FCA_GND8047885_ACTGCTCCAATGCCAT	2016	FCA_GND8047885	F81	female	CD45-	0.0258205	4144	0.196694	0.109313	1	8.8	N	1	Supporting	Supp_preGC_I
FCA_GND8047885_ACTGCTCCAGAGTGTG	2399	FCA_GND8047885	F81	female	CD45-	0.0661868	5001	0.149798	0.109313	1	8.8	N	1	Supporting	Supp_preGC_I
FCA_GND8047885_ACTGCTCCAGGTCGTC	1488	FCA_GND8047885	F81	female	CD45-	0.0512461	2849	0.0568862	0.0554324	1	8.8	N	2	Mesenchymal_LHX9_ARX	Mesen_ovarianStroma
FCA_GND8047885_ACTGCTCCAGTGAGTG	3484	FCA_GND8047885	F81	female	CD45-	0.02334	9940	0.0841813	0.0808939	1	8.8	N	1	Supporting	Supp_preGC_IIb
FCA_GND8047885_ACTGCTCGTCCGAACC	2189	FCA_GND8047885	F81	female	CD45-	0.0683099	4260	0.124555	0.140645	1	8.8	N	1	Supporting	Supp_preGC_I
FCA_GND8047885_ACTGCTCGTTCAGTAC	2342	FCA_GND8047885	F81	female	CD45-	0.0562205	5514	0.07	0.114094	1	8.8	N	1	Supporting	Supp_preGC_IIa
FCA_GND8047885_ACTGCTCTCACGAAGG	2801	FCA_GND8047885	F81	female	CD45-	0.0150119	7594	0.176829	0.07	1	8.8	N	1	Supporting	Supp_preGC_IIb
FCA_GND8047885_ACTGCTCTCGGTTAAC	2055	FCA_GND8047885	F81	female	CD45-	0.0212884	5402	0.117446	0.104762	1	8.8	N	1	Supporting	Supp_preGC_IIa
FCA_GND8047885_ACTGCTCTCTGATTCT	2755	FCA_GND8047885	F81	female	CD45-	0.0275655	7328	0.0664506	0.0526316	1	8.8	N	2	Mesenchymal_LHX9_ARX	Mesen_ovarianStroma
FCA_GND8047885_ACTGCTCTCTGCCAGG	3104	FCA_GND8047885	F81	female	CD45-	0.0493471	6586	0.154696	0.238462	0.826584	8.8	N	1	Supporting	Supp_preGC_I
FCA_GND8047885_ACTGCTCTCTGCGACG	3117	FCA_GND8047885	F81	female	CD45-	0.0574099	8239	0.22905	0.211909	1	8.8	N	1	Supporting	Supp_preGC_I
FCA_GND8047885_ACTGCTCTCTGCTTGC	2625	FCA_GND8047885	F81	female	CD45-	0.029703	6161	0.0664506	0.0900437	1	8.8	N	1	Supporting	Supp_preGC_IIc
FCA_GND8047885_ACTGTCCAGAGCTATA	2230	FCA_GND8047885	F81	female	CD45-	0.0636512	4289	0.0777385	0.0798206	1	8.8	N	1	Supporting	Supp_preGC_I
FCA_GND8047885_ACTGTCCAGGACAGAA	1858	FCA_GND8047885	F81	female	CD45-	0.0068323	4830	0.0540146	0.0798206	1	8.8	N	1	Supporting	Supp_preGC_IIa
FCA_GND8047885_ACTGTCCAGGCACATG	1794	FCA_GND8047885	F81	female	CD45-	0.0434527	3406	0.0438247	0.0888252	1	8.8	N	1	Supporting	Supp_preGC_I
FCA_GND8047885_ACTGTCCCACATCCGG	1056	FCA_GND8047885	F81	female	CD45-	0.124488	1952	0.0568862	0.101871	1	8.8	N	1	Supporting	Supp_preGC_I
FCA_GND8047885_ACTGTCCCATTTCAGG	1609	FCA_GND8047885	F81	female	CD45-	0.0103707	4532	0.0393901	0.0777385	1	8.8	N	1	Supporting	Supp_ovarianSurf
FCA_GND8047885_ACTGTCCGTACGCTGC	2831	FCA_GND8047885	F81	female	CD45-	0.0262105	7745	0.15983	0.128329	1	8.8	N	0	Mesenchymal_GATA2_NR2F1	Mesenchymal_GATA2_NR2F1
FCA_GND8047885_ACTGTCCGTCATATCG	2522	FCA_GND8047885	F81	female	CD45-	0.021399	7477	0.0912621	0.0937808	1	8.8	N	0	Mesenchymal_GATA2_NR2F1	Mesenchymal_GATA2_NR2F1
FCA_GND8047885_ACTGTCCGTCTCTTTA	1720	FCA_GND8047885	F81	female	CD45-	0.0262571	4037	0.0554324	0.0912621	1	8.8	N	9	PV	PV
FCA_GND8047885_ACTGTCCGTGATGCCC	2142	FCA_GND8047885	F81	female	CD45-	0.068471	4323	0.149798	0.104762	1	8.8	N	1	Supporting	Supp_preGC_I
FCA_GND8047885_ACTGTCCTCAGGCGAA	2149	FCA_GND8047885	F81	female	CD45-	0.0263266	4862	0.176829	0.114094	1	8.8	N	1	Supporting	Supp_preGC_IIa
FCA_GND8047885_ACTGTCCTCATAGCAC	3461	FCA_GND8047885	F81	female	CD45-	0.00396866	9827	0.170877	0.15983	1	8.8	N	1	Supporting	Supp_preGC_IIb
FCA_GND8047885_ACTGTCCTCCCGACTT	1664	FCA_GND8047885	F81	female	CD45-	0.0263708	3830	0.0819672	0.0737564	1	8.8	N	2	Mesenchymal_LHX9_ARX	Mesen_ovarianStroma
FCA_GND8047885_ACTGTCCTCCGAATGT	1779	FCA_GND8047885	F81	female	CD45-	0.0422798	4281	0.0554324	0.128329	1	8.8	N	5	Coel Epi	Supp_ovarianSurf
FCA_GND8047885_ACTGTCCTCTGGTTCC	1486	FCA_GND8047885	F81	female	CD45-	0.0255674	3481	0.0630915	0.0554324	1	8.8	N	2	Mesenchymal_LHX9_ARX	Mesen_dorsalMesentery
FCA_GND8047885_ACTTACTAGAATAGGG	2099	FCA_GND8047885	F81	female	CD45-	0.0793247	4324	0.238462	0.109313	1	8.8	N	1	Supporting	Supp_preGC_I
FCA_GND8047885_ACTTACTAGACATAAC	1645	FCA_GND8047885	F81	female	CD45-	0.0404984	4173	0.0630915	0.0606932	1	8.8	N	2	Mesenchymal_LHX9_ARX	Mesen_ovarianStroma
FCA_GND8047885_ACTTACTAGATGTTAG	2603	FCA_GND8047885	F81	female	CD45-	0.0125523	6931	0.0554324	0.104762	1	8.8	N	1	Supporting	Supp_preGC_IIb
FCA_GND8047885_ACTTACTAGCCCTAAT	2495	FCA_GND8047885	F81	female	CD45-	0.0615248	5640	0.0819672	0.0777385	1	8.8	N	1	Supporting	Supp_preGC_I
FCA_GND8047885_ACTTACTAGCTGCCCA	2105	FCA_GND8047885	F81	female	CD45-	0.0202132	5442	0.132262	0.109313	1	8.8	N	1	Supporting	Supp_preGC_IIa
FCA_GND8047885_ACTTACTAGGCAAAGA	2806	FCA_GND8047885	F81	female	CD45-	0.0684891	6804	0.075718	0.147458	1	8.8	N	1	Supporting	Supp_preGC_IIb
FCA_GND8047885_ACTTACTAGTCCGGTC	2490	FCA_GND8047885	F81	female	CD45-	0.0430335	5670	0.0682005	0.0900437	1	8.8	N	1	Supporting	Supp_preGC_IIc
FCA_GND8047885_ACTTACTAGTTCCACA	2221	FCA_GND8047885	F81	female	CD45-	0.0115078	4258	0.0353228	0.0410827	1	8.8	N	1	Supporting	Supp_preGC_IIb
FCA_GND8047885_ACTTACTCAATAACGA	2582	FCA_GND8047885	F81	female	CD45-	0.0440601	6128	0.149798	0.147458	1	8.8	N	1	Supporting	Supp_preGC_IIa
FCA_GND8047885_ACTTACTCACATTCGA	2675	FCA_GND8047885	F81	female	CD45-	0.0218562	6314	0.12093	0.107759	1	8.8	N	1	Supporting	Supp_preGC_IIa
FCA_GND8047885_ACTTACTCATACGCTA	1210	FCA_GND8047885	F81	female	CD45-	0.101449	2070	0.0888252	0.126442	1	8.8	N	1	Supporting	Supp_preGC_I
FCA_GND8047885_ACTTACTGTGTTCTTT	3062	FCA_GND8047885	F81	female	CD45-	0.050649	7858	0.0819672	0.0900437	1	8.8	N	1	Supporting	Supp_preGC_I
FCA_GND8047885_ACTTACTTCGATGAGG	2495	FCA_GND8047885	F81	female	CD45-	0.0066103	6505	0.0819672	0.104762	1	8.8	N	1	Supporting	Supp_preGC_IIa
FCA_GND8047885_ACTTACTTCGCGCCAA	1822	FCA_GND8047885	F81	female	CD45-	0.018287	4320	0.00924703	0.0130112	1	8.8	N	0	Mesenchymal_GATA2_NR2F1	Mesenchymal_GATA2_NR2F1
FCA_GND8047885_ACTTACTTCTCGAGTA	2430	FCA_GND8047885	F81	female	CD45-	0.0657592	4775	0.12093	0.112481	1	8.8	N	1	Supporting	Supp_preGC_I
FCA_GND8047885_ACTTACTTCTCTGCTG	2506	FCA_GND8047885	F81	female	CD45-	0.0499336	5267	0.196694	0.12093	1	8.8	N	1	Supporting	Supp_preGC_I
FCA_GND8047885_ACTTACTTCTGTACGA	2753	FCA_GND8047885	F81	female	CD45-	0.054366	5978	0.149798	0.12093	1	8.8	N	1	Supporting	Supp_sLGR5_female
FCA_GND8047885_ACTTGTTAGACAGGCT	2269	FCA_GND8047885	F81	female	CD45-	0.00143601	5571	0.0264901	0.0474372	1	8.8	N	1	Supporting	Supp_preGC_IIb
FCA_GND8047885_ACTTGTTAGCTACCGC	2234	FCA_GND8047885	F81	female	CD45-	0.0297851	5909	0.07	0.0718512	1	8.8	N	2	Mesenchymal_LHX9_ARX	Mesen_ovarianStroma
FCA_GND8047885_ACTTGTTAGGACAGCT	2710	FCA_GND8047885	F81	female	CD45-	0.0355686	7844	0.136364	0.110867	1	8.8	N	1	Supporting	Supp_preGC_IIa
FCA_GND8047885_ACTTGTTAGGTGATAT	3801	FCA_GND8047885	F81	female	CD45-	0.010093	11295	0.128329	0.128329	1	8.8	N	1	Supporting	Supp_preGC_IIb
FCA_GND8047885_ACTTGTTAGTCATGCT	2384	FCA_GND8047885	F81	female	CD45-	0.0386396	5616	0.075718	0.0606932	1	8.8	N	5	Coel Epi	Supp_ovarianSurf
FCA_GND8047885_ACTTGTTCAATCTGCA	3579	FCA_GND8047885	F81	female	CD45-	0.0417777	11633	0.0990807	0.0647482	1	8.8	N	0	Mesenchymal_GATA2_NR2F1	Mesenchymal_GATA2_NR2F1
FCA_GND8047885_ACTTGTTCACCACCAG	1657	FCA_GND8047885	F81	female	CD45-	0.0453275	3221	0.0599078	0.140645	1	8.8	N	1	Supporting	Supp_preGC_I
FCA_GND8047885_ACTTGTTCAGCCACCA	1713	FCA_GND8047885	F81	female	CD45-	0.0188046	4467	0.0383407	0.0798206	1	8.8	N	1	Supporting	Supp_preGC_IIa
FCA_GND8047885_ACTTGTTCAGCTGTAT	1643	FCA_GND8047885	F81	female	CD45-	0.029179	4044	0.104762	0.0718512	1	8.8	N	2	Mesenchymal_LHX9_ARX	Mesen_testisStroma
FCA_GND8047885_ACTTGTTGTCAACTGT	3112	FCA_GND8047885	F81	female	CD45-	0.0803854	6643	0.0599078	0.0798206	1	8.8	N	1	Supporting	Supp_preGC_I
FCA_GND8047885_ACTTGTTGTTCTGAAC	2205	FCA_GND8047885	F81	female	CD45-	0.0570431	4295	0.0499648	0.0798206	1	8.8	N	1	Supporting	Supp_preGC_I
FCA_GND8047885_ACTTGTTTCGACCAGC	2079	FCA_GND8047885	F81	female	CD45-	0.0158375	5367	0.0281215	0.0272981	1	8.8	N	0	Mesenchymal_GATA2_NR2F1	Mesenchymal_GATA2_NR2F1
FCA_GND8047885_ACTTTCAAGACAAAGG	3638	FCA_GND8047885	F81	female	CD45-	0.0193284	11227	0.117446	0.0512821	1	8.8	N	5	Coel Epi	Supp_ovarianSurf
FCA_GND8047885_ACTTTCAAGAGTAATC	2173	FCA_GND8047885	F81	female	CD45-	0.012084	5048	0.0599078	0.07	1	8.8	N	1	Supporting	Supp_preGC_IIb
FCA_GND8047885_ACTTTCACAAGAGGCT	1777	FCA_GND8047885	F81	female	CD45-	0.043349	4037	0.0583776	0.07	1	8.8	N	2	Mesenchymal_LHX9_ARX	Mesen_ovarianStroma
FCA_GND8047885_ACTTTCACAAGGACAC	2321	FCA_GND8047885	F81	female	CD45-	0.0203415	6735	0.0614786	0.0272981	1	8.8	N	0	Mesenchymal_GATA2_NR2F1	Mesen_dorsalMesentery
FCA_GND8047885_ACTTTCACAAGTCTAC	3475	FCA_GND8047885	F81	female	CD45-	0.0237912	9079	0.170877	0.0900437	1	8.8	N	1	Supporting	Supp_preGC_I
FCA_GND8047885_ACTTTCACACCCATTC	1746	FCA_GND8047885	F81	female	CD45-	0.038525	3634	0.362398	0.147458	1	8.8	N	1	Supporting	Supp_sKITLG
FCA_GND8047885_ACTTTCACACCGATAT	2417	FCA_GND8047885	F81	female	CD45-	0.0129032	7440	0.0554324	0.0415584	1	8.8	N	1	Supporting	Supp_preGC_IIb
FCA_GND8047885_ACTTTCACATATGAGA	2093	FCA_GND8047885	F81	female	CD45-	0.0264386	5144	0.0630915	0.0554324	1	8.8	N	0	Mesenchymal_GATA2_NR2F1	Mesen_dorsalMesentery
FCA_GND8047885_ACTTTCACATCACAAC	3017	FCA_GND8047885	F81	female	CD45-	0.0181721	7484	0.0682005	0.07	1	8.8	N	1	Supporting	Supp_preGC_IIb
FCA_GND8047885_ACTTTCACATGAACCT	2886	FCA_GND8047885	F81	female	CD45-	0.0396084	6741	0.15983	0.211909	1	8.8	N	1	Supporting	Supp_preGC_IIc
FCA_GND8047885_ACTTTCAGTACGCACC	2281	FCA_GND8047885	F81	female	CD45-	0.0479481	4776	0.0363077	0.0554324	1	8.8	N	1	Supporting	Supp_preGC_I
FCA_GND8047885_ACTTTCAGTAGCGCAA	2225	FCA_GND8047885	F81	female	CD45-	0.0836925	4409	0.0777385	0.0888252	1	8.8	N	1	Supporting	Supp_preGC_I
FCA_GND8047885_ACTTTCAGTCGGGTCT	1893	FCA_GND8047885	F81	female	CD45-	0.0718184	3481	0.136364	0.109313	1	8.8	N	1	Supporting	Supp_preGC_I
FCA_GND8047885_ACTTTCAGTGTCTGAT	2589	FCA_GND8047885	F81	female	CD45-	0.0250809	7416	0.128329	0.0737564	1	8.8	N	1	Supporting	Supp_preGC_IIa
FCA_GND8047885_ACTTTCAGTTAAGGGC	2470	FCA_GND8047885	F81	female	CD45-	0.0497583	4964	0.128329	0.0841813	1	8.8	N	1	Supporting	Supp_sLGR5_female
FCA_GND8047885_ACTTTCATCCTATTCA	2158	FCA_GND8047885	F81	female	CD45-	0.020512	5899	0.0963855	0.0614786	1	8.8	N	2	Mesenchymal_LHX9_ARX	Mesen_ovarianStroma
FCA_GND8047885_ACTTTCATCGGATGTT	2685	FCA_GND8047885	F81	female	CD45-	0.0409395	7621	0.114094	0.0876457	1	8.8	N	2	Mesenchymal_LHX9_ARX	Mesen_ovarianStroma
FCA_GND8047885_ACTTTCATCTAACTCT	2466	FCA_GND8047885	F81	female	CD45-	0.0255307	6972	0.0353228	0.0272981	1	8.8	N	0	Mesenchymal_GATA2_NR2F1	Mesen_dorsalMesentery
FCA_GND8047885_ACTTTCATCTTGCATT	2467	FCA_GND8047885	F81	female	CD45-	0.00436535	5956	0.0324867	0.0480507	1	8.8	N	1	Supporting	Supp_preGC_IIb
FCA_GND8047885_AGAATAGAGCAGCGTA	2324	FCA_GND8047885	F81	female	CD45-	0.0561148	4669	0.12093	0.0554324	1	8.8	N	1	Supporting	Supp_preGC_I
FCA_GND8047885_AGAATAGAGGGAGTAA	1699	FCA_GND8047885	F81	female	CD45-	0.0408589	4797	0.0393901	0.104762	1	8.8	N	1	Supporting	Supp_preGC_IIa
FCA_GND8047885_AGAATAGAGTGGCACA	2127	FCA_GND8047885	F81	female	CD45-	0.00447147	5591	0.0324867	0.0474372	1	8.8	N	1	Supporting	Supp_preGC_IIb
FCA_GND8047885_AGAATAGCAATGCCAT	2616	FCA_GND8047885	F81	female	CD45-	0.0127039	6376	0.0256971	0.0937808	1	8.8	N	1	Supporting	Supp_preGC_IIb
FCA_GND8047885_AGAATAGCAGTACACT	2084	FCA_GND8047885	F81	female	CD45-	0.043656	5383	0.0841813	0.114094	1	8.8	N	1	Supporting	Supp_preGC_IIa
FCA_GND8047885_AGAATAGCATCGACGC	1749	FCA_GND8047885	F81	female	CD45-	0.0277648	4286	0.0990807	0.07	1	8.8	N	2	Mesenchymal_LHX9_ARX	Mesen_ovarianStroma
FCA_GND8047885_AGAATAGGTAAACGCG	1328	FCA_GND8047885	F81	female	CD45-	0.0165782	3016	0.0124481	0.0130112	1	8.8	N	0	Mesenchymal_GATA2_NR2F1	Mesenchymal_GATA2_NR2F1
FCA_GND8047885_AGAATAGGTCAACTGT	2630	FCA_GND8047885	F81	female	CD45-	0.0856724	5451	0.0798206	0.12093	1	8.8	N	1	Supporting	Supp_preGC_I
FCA_GND8047885_AGAATAGGTTATGCGT	2055	FCA_GND8047885	F81	female	CD45-	0.0244094	5080	0.132262	0.0798206	1	8.8	N	1	Supporting	Supp_preGC_IIa
FCA_GND8047885_AGAATAGTCGAGGTAG	2695	FCA_GND8047885	F81	female	CD45-	0.0236638	7353	0.128329	0.0937808	1	8.8	N	1	Supporting	Supp_preGC_IIa
FCA_GND8047885_AGAATAGTCTAACTGG	2078	FCA_GND8047885	F81	female	CD45-	0.0391315	4191	0.124555	0.109313	1	8.8	N	1	Supporting	Supp_preGC_I
FCA_GND8047885_AGAATAGTCTGAAAGA	2131	FCA_GND8047885	F81	female	CD45-	0.0734934	4082	0.110867	0.109313	1	8.8	N	1	Supporting	Supp_sLGR5_female
FCA_GND8047885_AGACGTTAGACTCGGA	1398	FCA_GND8047885	F81	female	CD45-	0.0218159	3117	0.0165854	0.0272981	1	8.8	N	0	Mesenchymal_GATA2_NR2F1	Mesen_dorsalMesentery
FCA_GND8047885_AGACGTTAGATAGCAT	2608	FCA_GND8047885	F81	female	CD45-	0.0444444	6075	0.220217	0.211909	1	8.8	N	1	Supporting	Supp_preGC_I
FCA_GND8047885_AGACGTTCAAAGCGGT	2092	FCA_GND8047885	F81	female	CD45-	0.0214939	4699	0.149798	0.106369	1	8.8	N	1	Supporting	Supp_preGC_IIb
FCA_GND8047885_AGACGTTCAATCCAAC	2043	FCA_GND8047885	F81	female	CD45-	0.0571692	4338	0.283186	0.101871	1	8.8	N	1	Supporting	Supp_sLGR5_female
FCA_GND8047885_AGACGTTGTGGCGAAT	1916	FCA_GND8047885	F81	female	CD45-	0.0432669	4114	0.204082	0.110867	1	8.8	N	1	Supporting	Supp_preGC_I
FCA_GND8047885_AGACGTTGTGTGAATA	1735	FCA_GND8047885	F81	female	CD45-	0.0207289	4390	0.0888252	0.104762	1	8.8	N	1	Supporting	Supp_preGC_IIa
FCA_GND8047885_AGACGTTTCTGTTGAG	2122	FCA_GND8047885	F81	female	CD45-	0.0486757	4191	0.0554324	0.0664506	1	8.8	N	1	Supporting	Supp_sLGR5_female
FCA_GND8047885_AGAGCGAAGACACTAA	2005	FCA_GND8047885	F81	female	CD45-	0.00385925	4405	0.0315789	0.0410827	1	8.8	N	1	Supporting	Supp_preGC_IIb
FCA_GND8047885_AGAGCGAAGAGACTAT	2161	FCA_GND8047885	F81	female	CD45-	0.0202453	6767	0.0461957	0.0614786	1	8.8	N	2	Mesenchymal_LHX9_ARX	Mesen_ovarianStroma
FCA_GND8047885_AGAGCGAAGATATGCA	2186	FCA_GND8047885	F81	female	CD45-	0.00668114	5987	0.0737564	0.0614786	1	8.8	N	1	Supporting	Supp_preGC_IIa
FCA_GND8047885_AGAGCGAAGATGTAAC	1748	FCA_GND8047885	F81	female	CD45-	0.0282178	4040	0.12093	0.0937808	1	8.8	N	1	Supporting	Supp_preGC_IIa
FCA_GND8047885_AGAGCGACAGCATACT	1652	FCA_GND8047885	F81	female	CD45-	0.0612061	3333	0.0526316	0.109313	1	8.8	N	1	Supporting	Supp_preGC_I
FCA_GND8047885_AGAGCGACAGTATCTG	1314	FCA_GND8047885	F81	female	CD45-	0.0262318	2821	0.0165854	0.0272981	1	8.8	N	0	Mesenchymal_GATA2_NR2F1	Mesenchymal_GATA2_NR2F1
FCA_GND8047885_AGAGCGACATACGCCG	1490	FCA_GND8047885	F81	female	CD45-	0.0483076	3043	0.0798206	0.0888252	1	8.8	N	1	Supporting	Supp_preGC_I
FCA_GND8047885_AGAGCGACATACGCTA	3125	FCA_GND8047885	F81	female	CD45-	0.0439408	8648	0.382857	0.211909	1	8.8	N	1	Supporting	Supp_preGC_IIb
FCA_GND8047885_AGAGCGACATCGGACC	1324	FCA_GND8047885	F81	female	CD45-	0.0525158	3637	0.0373134	0.0606932	1	8.8	N	2	Mesenchymal_LHX9_ARX	Mesen_testisStroma
FCA_GND8047885_AGAGCGACATGTCGAT	1723	FCA_GND8047885	F81	female	CD45-	0.0148227	3778	0.0281215	0.0474372	1	8.8	N	1	Supporting	Supp_preGC_IIb
FCA_GND8047885_AGAGCGAGTACCCAAT	1334	FCA_GND8047885	F81	female	CD45-	0.038214	2486	0.0474227	0.112481	1	8.8	N	1	Supporting	Supp_preGC_I
FCA_GND8047885_AGAGCGAGTTAGGGTG	1534	FCA_GND8047885	F81	female	CD45-	0.0421999	2891	0.0599078	0.112481	1	8.8	N	1	Supporting	Supp_preGC_I
FCA_GND8047885_AGAGCGATCCAAGTAC	2845	FCA_GND8047885	F81	female	CD45-	0.0526853	6852	0.0937808	0.0554324	1	8.8	N	1	Supporting	Supp_preGC_I
FCA_GND8047885_AGAGCGATCCGGGTGT	1968	FCA_GND8047885	F81	female	CD45-	0.0430083	4348	0.196694	0.211909	1	8.8	N	1	Supporting	Supp_preGC_I
FCA_GND8047885_AGAGCGATCCTGCCAT	2219	FCA_GND8047885	F81	female	CD45-	0.00282699	5306	0.0486787	0.0718512	1	8.8	N	1	Supporting	Supp_preGC_IIb
FCA_GND8047885_AGAGCGATCTTGAGGT	1267	FCA_GND8047885	F81	female	CD45-	0.014251	2877	0.0135831	0.0272981	1	8.8	N	0	Mesenchymal_GATA2_NR2F1	Mesen_dorsalMesentery
FCA_GND8047885_AGAGCTTAGAAGGCCT	3970	FCA_GND8047885	F81	female	CD45-	0.0365693	11403	0.663551	0.211909	1	8.8	N	1	Supporting	Supp_preGC_I
FCA_GND8047885_AGAGCTTAGACATAAC	1760	FCA_GND8047885	F81	female	CD45-	0.0211914	4247	0.0864662	0.117446	1	8.8	N	7	Endothelial	Endothelial
FCA_GND8047885_AGAGCTTAGCCACGTC	2392	FCA_GND8047885	F81	female	CD45-	0.0384139	6456	0.0461957	0.0647482	1	8.8	N	0	Mesenchymal_GATA2_NR2F1	Mesenchymal_GATA2_NR2F1
FCA_GND8047885_AGAGCTTAGCCCAGCT	1812	FCA_GND8047885	F81	female	CD45-	0.0509944	3922	0.101871	0.101871	1	8.8	N	1	Supporting	Supp_preGC_I
FCA_GND8047885_AGAGCTTAGGGATGGG	2310	FCA_GND8047885	F81	female	CD45-	0.0535568	4892	0.0718512	0.0841813	1	8.8	N	1	Supporting	Supp_sLGR5_female
FCA_GND8047885_AGAGCTTCACAACGCC	1866	FCA_GND8047885	F81	female	CD45-	0.0660592	3512	0.117446	0.109313	1	8.8	N	1	Supporting	Supp_preGC_I
FCA_GND8047885_AGAGCTTCAGGCTCAC	1193	FCA_GND8047885	F81	female	CD45-	0.0787487	1854	0.0289608	0.0798206	1	8.8	N	1	Supporting	Supp_preGC_I
FCA_GND8047885_AGAGCTTCAGGCTGAA	2173	FCA_GND8047885	F81	female	CD45-	0.0248702	7318	0.0334129	0.0606932	1	8.8	N	2	Mesenchymal_LHX9_ARX	Mesen_ovarianStroma
FCA_GND8047885_AGAGCTTGTACAGTGG	1635	FCA_GND8047885	F81	female	CD45-	0.0130924	3819	0.0864662	0.0606932	1	8.8	N	2	Mesenchymal_LHX9_ARX	Mesen_testisStroma
FCA_GND8047885_AGAGCTTGTGCAGTAG	1067	FCA_GND8047885	F81	female	CD45-	0.0596261	1979	0.0777385	0.0798206	1	8.8	N	1	Supporting	Supp_preGC_I
FCA_GND8047885_AGAGCTTTCCTCTAGC	3048	FCA_GND8047885	F81	female	CD45-	0.040615	7805	0.524528	0.0647482	1	8.8	N	5	Coel Epi	Supp_coelEpi
FCA_GND8047885_AGAGTGGAGACCTTTG	2187	FCA_GND8047885	F81	female	CD45-	0.00455373	5490	0.0383407	0.0718512	1	8.8	N	1	Supporting	Supp_preGC_IIa
FCA_GND8047885_AGAGTGGAGAGTGAGA	1896	FCA_GND8047885	F81	female	CD45-	0.0376138	4945	0.0234043	0.0512821	1	8.8	N	5	Coel Epi	Supp_ovarianSurf
FCA_GND8047885_AGAGTGGAGCTTCGCG	1798	FCA_GND8047885	F81	female	CD45-	0.0261894	4582	0.0461957	0.0777385	1	8.8	N	5	Coel Epi	Supp_ovarianSurf
FCA_GND8047885_AGAGTGGAGGAGCGTT	1349	FCA_GND8047885	F81	female	CD45-	0.0749688	2401	0.117446	0.140645	1	8.8	N	1	Supporting	Supp_preGC_I
FCA_GND8047885_AGAGTGGCAATGGTCT	2121	FCA_GND8047885	F81	female	CD45-	0.0529992	4868	0.124555	0.119188	1	8.8	N	1	Supporting	Supp_preGC_IIc
FCA_GND8047885_AGAGTGGCACAGCGTC	2304	FCA_GND8047885	F81	female	CD45-	0.0335086	6655	0.0841813	0.0963855	1	8.8	N	1	Supporting	Supp_preGC_IIa
FCA_GND8047885_AGAGTGGCAGTACACT	1899	FCA_GND8047885	F81	female	CD45-	0.0190888	5553	0.0383407	0.0664506	1	8.8	N	2	Mesenchymal_LHX9_ARX	Mesen_ovarianStroma
FCA_GND8047885_AGAGTGGCATACTACG	1682	FCA_GND8047885	F81	female	CD45-	0.0147874	3246	0.104762	0.0798206	1	8.8	N	1	Supporting	Supp_preGC_IIa
FCA_GND8047885_AGAGTGGGTAATCGTC	2273	FCA_GND8047885	F81	female	CD45-	0.0117823	5347	0.136364	0.0480507	1	8.8	N	1	Supporting	Supp_preGC_IIb
FCA_GND8047885_AGAGTGGGTAGTGAAT	2240	FCA_GND8047885	F81	female	CD45-	0.0496575	5256	0.136364	0.114094	1	8.8	N	1	Supporting	Supp_preGC_IIa
FCA_GND8047885_AGAGTGGGTCCAGTTA	3199	FCA_GND8047885	F81	female	CD45-	0.0397294	8130	0.0324867	0.0554324	1	8.8	N	1	Supporting	Supp_preGC_I
FCA_GND8047885_AGAGTGGTCAACACAC	2321	FCA_GND8047885	F81	female	CD45-	0.00711491	5622	0.0599078	0.0614786	1	8.8	N	1	Supporting	Supp_preGC_IIa
FCA_GND8047885_AGAGTGGTCAGTGCAT	1834	FCA_GND8047885	F81	female	CD45-	0.0271739	4968	0.075718	0.0798206	1	8.8	N	1	Supporting	Supp_preGC_IIa
FCA_GND8047885_AGAGTGGTCCGCGTTT	1567	FCA_GND8047885	F81	female	CD45-	0.0422018	3270	0.104762	0.0888252	1	8.8	N	1	Supporting	Supp_preGC_I
FCA_GND8047885_AGAGTGGTCGCGTAGC	1796	FCA_GND8047885	F81	female	CD45-	0.0107803	3896	0.0583776	0.109313	1	8.8	N	1	Supporting	Supp_preGC_IIb
FCA_GND8047885_AGAGTGGTCGGAAATA	2638	FCA_GND8047885	F81	female	CD45-	0.0339426	7660	0.104762	0.0718512	1	8.8	N	0	Mesenchymal_GATA2_NR2F1	Mesenchymal_GATA2_NR2F1
FCA_GND8047885_AGAGTGGTCTGTACGA	2490	FCA_GND8047885	F81	female	CD45-	0.0477368	5258	0.0737564	0.11577	1	8.8	N	1	Supporting	Supp_preGC_I
FCA_GND8047885_AGATCTGAGAATTGTG	2830	FCA_GND8047885	F81	female	CD45-	0.0407153	8891	0.0664506	0.0841813	1	8.8	N	0	Mesenchymal_GATA2_NR2F1	Mesenchymal_GATA2_NR2F1
FCA_GND8047885_AGATCTGAGCGCCTTG	2335	FCA_GND8047885	F81	female	CD45-	0.0137981	5508	0.0864662	0.0777385	1	8.8	N	5	Coel Epi	Supp_ovarianSurf
FCA_GND8047885_AGATCTGAGCTAACAA	1646	FCA_GND8047885	F81	female	CD45-	0.0187032	4010	0.0334129	0.0404624	1	8.8	N	0	Mesenchymal_GATA2_NR2F1	Mesen_testisStroma
FCA_GND8047885_AGATCTGAGGATGCGT	1714	FCA_GND8047885	F81	female	CD45-	0.0626836	3063	0.0777385	0.0526316	1	8.8	N	1	Supporting	Supp_preGC_I
FCA_GND8047885_AGATCTGCAAGCCGTC	1658	FCA_GND8047885	F81	female	CD45-	0.0209075	4496	0.075718	0.0718512	1	8.8	N	2	Mesenchymal_LHX9_ARX	Mesen_testisStroma
FCA_GND8047885_AGATCTGCAATCCAAC	1350	FCA_GND8047885	F81	female	CD45-	0.0204346	3083	0.176829	0.072859	1	8.8	N	9	PV	PV
FCA_GND8047885_AGATCTGCACAACGTT	1649	FCA_GND8047885	F81	female	CD45-	0.0229268	4100	0.0614786	0.075718	1	8.8	N	2	Mesenchymal_LHX9_ARX	Mesen_dorsalMesentery
FCA_GND8047885_AGATCTGCACATAACC	2985	FCA_GND8047885	F81	female	CD45-	0.0619434	7523	0.140645	0.126442	1	8.8	N	1	Supporting	Supp_preGC_I
FCA_GND8047885_AGATCTGCACGTCAGC	1923	FCA_GND8047885	F81	female	CD45-	0.0171648	4952	0.107759	0.104762	1	8.8	N	1	Supporting	Supp_preGC_IIa
FCA_GND8047885_AGATCTGGTACTTAGC	2848	FCA_GND8047885	F81	female	CD45-	0.0235152	7442	0.196694	0.104762	1	8.8	N	1	Supporting	Supp_preGC_IIb
FCA_GND8047885_AGATCTGGTGATGTCT	1944	FCA_GND8047885	F81	female	CD45-	0.0293676	4665	0.0315789	0.0876457	1	8.8	N	0	Mesenchymal_GATA2_NR2F1	Mesen_ovarianStroma
FCA_GND8047885_AGATCTGGTTCCGTCT	2175	FCA_GND8047885	F81	female	CD45-	0.0656333	4129	0.0777385	0.104762	1	8.8	N	1	Supporting	Supp_preGC_I
FCA_GND8047885_AGATCTGGTTTGGGCC	1358	FCA_GND8047885	F81	female	CD45-	0.0288298	3538	0.0682005	0.0963855	1	8.8	N	7	Endothelial	Endothelial
FCA_GND8047885_AGATCTGTCCACGAAT	1569	FCA_GND8047885	F81	female	CD45-	0.0176565	4361	0.0226674	0.0554324	1	8.8	N	0	Mesenchymal_GATA2_NR2F1	Mesen_dorsalMesentery
FCA_GND8047885_AGATTGCAGAAGATTC	1579	FCA_GND8047885	F81	female	CD45-	0.054363	3587	0.12093	0.0888252	1	8.8	N	5	Coel Epi	Supp_ovarianSurf
FCA_GND8047885_AGATTGCAGAGGGCTT	2386	FCA_GND8047885	F81	female	CD45-	0.0598968	5426	0.0486787	0.0664506	1	8.8	N	1	Supporting	Supp_sLGR5_female
FCA_GND8047885_AGATTGCAGCCAGTTT	2044	FCA_GND8047885	F81	female	CD45-	0.0458783	5471	0.0841813	0.0547235	1	8.8	N	2	Mesenchymal_LHX9_ARX	Mesen_ovarianStroma
FCA_GND8047885_AGATTGCAGGTGTTAA	2128	FCA_GND8047885	F81	female	CD45-	0.0674686	3824	0.0864662	0.11577	1	8.8	N	1	Supporting	Supp_sLGR5_female
FCA_GND8047885_AGATTGCAGTTAACGA	2092	FCA_GND8047885	F81	female	CD45-	0.0557522	4520	0.238462	0.140645	1	8.8	N	1	Supporting	Supp_preGC_I
FCA_GND8047885_AGATTGCCAAGAAGAG	1921	FCA_GND8047885	F81	female	CD45-	0.0781759	3991	0.104762	0.112481	1	8.8	N	1	Supporting	Supp_preGC_I
FCA_GND8047885_AGATTGCCACACCGAC	2672	FCA_GND8047885	F81	female	CD45-	0.0398059	8039	0.0963855	0.0963855	1	8.8	N	1	Supporting	Supp_preGC_IIb
FCA_GND8047885_AGATTGCCACCCATGG	1682	FCA_GND8047885	F81	female	CD45-	0.0286958	5053	0.0682005	0.0614786	1	8.8	N	0	Mesenchymal_GATA2_NR2F1	Mesen_ovarianStroma
FCA_GND8047885_AGATTGCCAGACAGGT	1963	FCA_GND8047885	F81	female	CD45-	0.0376601	5231	0.0568862	0.109313	1	8.8	N	2	Mesenchymal_LHX9_ARX	Mesen_ovarianStroma
FCA_GND8047885_AGATTGCCATACTCTT	2103	FCA_GND8047885	F81	female	CD45-	0.0598425	4445	0.15983	0.109313	1	8.8	N	1	Supporting	Supp_sLGR5_female
FCA_GND8047885_AGATTGCCATCACCCT	2363	FCA_GND8047885	F81	female	CD45-	0.0197726	6069	0.101871	0.104762	1	8.8	N	1	Supporting	Supp_preGC_IIa
FCA_GND8047885_AGATTGCCATGATCCA	1855	FCA_GND8047885	F81	female	CD45-	0.00770953	4021	0.0682005	0.0614786	1	8.8	N	1	Supporting	Supp_preGC_IIb
FCA_GND8047885_AGATTGCGTAGCACGA	1785	FCA_GND8047885	F81	female	CD45-	0.0185881	4788	0.0777385	0.0718512	1	8.8	N	2	Mesenchymal_LHX9_ARX	Mesen_testisStroma
FCA_GND8047885_AGATTGCGTCTCAACA	2234	FCA_GND8047885	F81	female	CD45-	0.0494775	4689	0.165217	0.109313	1	8.8	N	1	Supporting	Supp_preGC_I
FCA_GND8047885_AGATTGCGTGGTAACG	2105	FCA_GND8047885	F81	female	CD45-	0.0286063	5733	0.0841813	0.075718	1	8.8	N	0	Mesenchymal_GATA2_NR2F1	Mesen_ovarianStroma
FCA_GND8047885_AGATTGCGTGTGCCTG	2582	FCA_GND8047885	F81	female	CD45-	0.0273192	6845	0.0737564	0.0963855	1	8.8	N	1	Supporting	Supp_preGC_IIb
FCA_GND8047885_AGATTGCTCCCATTTA	1976	FCA_GND8047885	F81	female	CD45-	0.00901431	5103	0.0474227	0.0963855	1	8.8	N	1	Supporting	Supp_preGC_IIa
FCA_GND8047885_AGATTGCTCCTAGAAC	1991	FCA_GND8047885	F81	female	CD45-	0.0300782	4987	0.101871	0.0614786	1	8.8	N	2	Mesenchymal_LHX9_ARX	Mesen_ovarianStroma
FCA_GND8047885_AGATTGCTCGACGGAA	1751	FCA_GND8047885	F81	female	CD45-	0.0494991	3394	0.211909	0.104762	1	8.8	N	1	Supporting	Supp_preGC_I
FCA_GND8047885_AGATTGCTCGGTTCGG	1808	FCA_GND8047885	F81	female	CD45-	0.0280674	4988	0.0990807	0.0718512	1	8.8	N	0	Mesenchymal_GATA2_NR2F1	Mesenchymal_GATA2_NR2F1
FCA_GND8047885_AGATTGCTCTGCGTAA	2454	FCA_GND8047885	F81	female	CD45-	0.0419524	7437	0.114094	0.0876457	1	8.8	N	2	Mesenchymal_LHX9_ARX	Mesen_ovarianStroma
FCA_GND8047885_AGATTGCTCTTGGGTA	1598	FCA_GND8047885	F81	female	CD45-	0.0149701	3340	0.0191726	0.0272981	1	8.8	N	0	Mesenchymal_GATA2_NR2F1	Mesen_dorsalMesentery
FCA_GND8047885_AGCAGCCAGCAGGTCA	1982	FCA_GND8047885	F81	female	CD45-	0.0499614	3883	0.0777385	0.0554324	1	8.8	N	1	Supporting	Supp_preGC_I
FCA_GND8047885_AGCAGCCAGCGAAGGG	2107	FCA_GND8047885	F81	female	CD45-	0.0356369	4153	0.204082	0.211909	1	8.8	N	1	Supporting	Supp_preGC_I
FCA_GND8047885_AGCAGCCAGTGCCATT	2432	FCA_GND8047885	F81	female	CD45-	0.0433459	5583	0.0841813	0.114094	1	8.8	N	1	Supporting	Supp_preGC_IIb
FCA_GND8047885_AGCAGCCAGTGTACGG	2713	FCA_GND8047885	F81	female	CD45-	0.00499212	7612	0.0841813	0.128329	1	8.8	N	1	Supporting	Supp_preGC_IIb
FCA_GND8047885_AGCAGCCCAAGTAATG	1660	FCA_GND8047885	F81	female	CD45-	0.0502821	4077	0.0393901	0.0334129	1	8.8	N	0	Mesenchymal_GATA2_NR2F1	Mesen_dorsalMesentery
FCA_GND8047885_AGCAGCCCAGGCTCAC	1824	FCA_GND8047885	F81	female	CD45-	0.0488764	3560	0.12093	0.110867	1	8.8	N	1	Supporting	Supp_preGC_I
FCA_GND8047885_AGCAGCCCATCGTCGG	1699	FCA_GND8047885	F81	female	CD45-	0.0507703	2856	0.136364	0.0888252	1	8.8	N	1	Supporting	Supp_preGC_I
FCA_GND8047885_AGCAGCCCATTTCAGG	1624	FCA_GND8047885	F81	female	CD45-	0.0389462	4365	0.110867	0.0963855	1	8.8	N	7	Endothelial	Endothelial
FCA_GND8047885_AGCAGCCGTCATACTG	1706	FCA_GND8047885	F81	female	CD45-	0.013018	4609	0.07	0.0798206	1	8.8	N	1	Supporting	Supp_preGC_IIa
FCA_GND8047885_AGCAGCCGTTCGGCAC	2266	FCA_GND8047885	F81	female	CD45-	0.0308889	4500	0.140645	0.211909	1	8.8	N	1	Supporting	Supp_preGC_I
FCA_GND8047885_AGCAGCCTCAAGGCTT	1953	FCA_GND8047885	F81	female	CD45-	0.0312918	3739	0.104762	0.0554324	1	8.8	N	1	Supporting	Supp_preGC_I
FCA_GND8047885_AGCAGCCTCACGATGT	1974	FCA_GND8047885	F81	female	CD45-	0.0583828	3871	0.0841813	0.0554324	1	8.8	N	1	Supporting	Supp_preGC_I
FCA_GND8047885_AGCAGCCTCATGTCCC	2528	FCA_GND8047885	F81	female	CD45-	0.0316678	5684	0.238462	0.0841813	1	8.8	N	1	Supporting	Supp_preGC_I
FCA_GND8047885_AGCAGCCTCCCTCTTT	2335	FCA_GND8047885	F81	female	CD45-	0.00554939	6307	0.0298165	0.0614786	1	8.8	N	1	Supporting	Supp_preGC_IIa
FCA_GND8047885_AGCAGCCTCCTATTCA	1956	FCA_GND8047885	F81	female	CD45-	0.0213562	4542	0.0819672	0.0682005	1	8.8	N	5	Coel Epi	Supp_preGC_IIa
FCA_GND8047885_AGCAGCCTCTCCCTGA	1654	FCA_GND8047885	F81	female	CD45-	0.0355191	4026	0.101871	0.0606932	1	8.8	N	2	Mesenchymal_LHX9_ARX	Mesen_ovarianStroma
FCA_GND8047885_AGCAGCCTCTGACCTC	2831	FCA_GND8047885	F81	female	CD45-	0.0348379	7865	0.075718	0.104762	1	8.8	N	1	Supporting	Supp_preGC_IIa
FCA_GND8047885_AGCATACAGAACAACT	3403	FCA_GND8047885	F81	female	CD45-	0.0431609	9453	0.0888252	0.119188	1	8.8	N	1	Supporting	Supp_preGC_IIb
FCA_GND8047885_AGCATACAGACTAGAT	2332	FCA_GND8047885	F81	female	CD45-	0.010885	6339	0.0599078	0.0682005	1	8.8	N	1	Supporting	Supp_preGC_IIa
FCA_GND8047885_AGCATACAGCGATCCC	1728	FCA_GND8047885	F81	female	CD45-	0.0771605	3564	0.107759	0.0664506	1	8.8	N	1	Supporting	Supp_sLGR5_female
FCA_GND8047885_AGCATACCAGTCAGAG	2162	FCA_GND8047885	F81	female	CD45-	0.0800841	4283	0.0937808	0.0554324	1	8.8	N	1	Supporting	Supp_preGC_I
FCA_GND8047885_AGCATACGTCACTTCC	2045	FCA_GND8047885	F81	female	CD45-	0.0707437	3859	0.124555	0.0664506	1	8.8	N	1	Supporting	Supp_sLGR5_female
FCA_GND8047885_AGCATACGTGAACCTT	2748	FCA_GND8047885	F81	female	CD45-	0.100672	5801	0.07	0.104762	1	8.8	N	1	Supporting	Supp_preGC_I
FCA_GND8047885_AGCATACGTGTAAGTA	1070	FCA_GND8047885	F81	female	CD45-	0.0110926	1803	0.0165854	0.0404624	1	8.8	N	0	Mesenchymal_GATA2_NR2F1	Mesen_dorsalMesentery
FCA_GND8047885_AGCATACGTTGATTCG	4287	FCA_GND8047885	F81	female	CD45-	0.0640471	13412	0.283186	0.211909	1	8.8	N	1	Supporting	Supp_preGC_I
FCA_GND8047885_AGCATACTCCAAATGC	2216	FCA_GND8047885	F81	female	CD45-	0.0195843	5821	0.154696	0.0737564	1	8.8	N	1	Supporting	Supp_preGC_IIa
FCA_GND8047885_AGCCTAAAGCGTAGTG	1129	FCA_GND8047885	F81	female	CD45-	0.0763654	2069	0.110867	0.101871	1	8.8	N	1	Supporting	Supp_sLGR5_female
FCA_GND8047885_AGCCTAACACAGTCGC	2108	FCA_GND8047885	F81	female	CD45-	0.0447043	4362	0.0614786	0.112481	1	8.8	N	1	Supporting	Supp_preGC_I
FCA_GND8047885_AGCCTAACACCGAATT	2567	FCA_GND8047885	F81	female	CD45-	0.0363129	6086	0.0937808	0.0718512	1	8.8	N	0	Mesenchymal_GATA2_NR2F1	Mesenchymal_GATA2_NR2F1
FCA_GND8047885_AGCCTAACACGAAATA	2598	FCA_GND8047885	F81	female	CD45-	0.0150193	6991	0.0426789	0.0480507	1	8.8	N	1	Supporting	Supp_preGC_IIa
FCA_GND8047885_AGCCTAACAGTTCCCT	2047	FCA_GND8047885	F81	female	CD45-	0.0484637	4003	0.0819672	0.140645	1	8.8	N	1	Supporting	Supp_preGC_I
FCA_GND8047885_AGCCTAACATTATCTC	2273	FCA_GND8047885	F81	female	CD45-	0.0322174	5556	0.0298165	0.0334129	1	8.8	N	0	Mesenchymal_GATA2_NR2F1	Mesen_dorsalMesentery
FCA_GND8047885_AGCCTAACATTGGGCC	2270	FCA_GND8047885	F81	female	CD45-	0.0745153	4952	0.124555	0.140645	1	8.8	N	1	Supporting	Supp_preGC_I
FCA_GND8047885_AGCCTAAGTCCGAACC	2154	FCA_GND8047885	F81	female	CD45-	0.0226658	4809	0.0614786	0.0512821	1	8.8	N	5	Coel Epi	Supp_ovarianSurf
FCA_GND8047885_AGCCTAAGTTCGTCTC	2056	FCA_GND8047885	F81	female	CD45-	0.0295645	5006	0.145119	0.107759	1	8.8	N	1	Supporting	Supp_preGC_IIa
FCA_GND8047885_AGCCTAAGTTTGACTG	2290	FCA_GND8047885	F81	female	CD45-	0.051407	4513	0.114094	0.126442	1	8.8	N	1	Supporting	Supp_preGC_I
FCA_GND8047885_AGCCTAATCAGCACAT	2955	FCA_GND8047885	F81	female	CD45-	0.00993103	7250	0.405405	0.211909	1	8.8	N	1	Supporting	Supp_preGC_I
FCA_GND8047885_AGCCTAATCCCTCAGT	2473	FCA_GND8047885	F81	female	CD45-	0.0257638	7103	0.0841813	0.0876457	1	8.8	N	2	Mesenchymal_LHX9_ARX	Mesen_ovarianStroma
FCA_GND8047885_AGCCTAATCGCCTGAG	2290	FCA_GND8047885	F81	female	CD45-	0.0590062	4830	0.0554324	0.0664506	1	8.8	N	1	Supporting	Supp_sLGR5_female
FCA_GND8047885_AGCCTAATCTGAAAGA	1504	FCA_GND8047885	F81	female	CD45-	0.0213082	4036	0.0512821	0.07	1	8.8	N	2	Mesenchymal_LHX9_ARX	Mesen_testisStroma
FCA_GND8047885_AGCGGTCAGTCATCCA	2453	FCA_GND8047885	F81	female	CD45-	0.0365042	5561	0.183099	0.147458	1	8.8	N	1	Supporting	Supp_preGC_I
FCA_GND8047885_AGCGGTCCAAGGTTCT	1729	FCA_GND8047885	F81	female	CD45-	0.0396391	3103	0.0841813	0.0554324	1	8.8	N	1	Supporting	Supp_preGC_I
FCA_GND8047885_AGCGGTCCAAGTTGTC	2185	FCA_GND8047885	F81	female	CD45-	0.0477133	4548	0.0383407	0.0554324	1	8.8	N	1	Supporting	Supp_preGC_I
FCA_GND8047885_AGCGGTCCAGACAAGC	2157	FCA_GND8047885	F81	female	CD45-	0.0106128	5842	0.0554324	0.0798206	1	8.8	N	1	Supporting	Supp_preGC_IIa
FCA_GND8047885_AGCGGTCCAGACGTAG	1833	FCA_GND8047885	F81	female	CD45-	0.0239659	5633	0.0226674	0.0526316	1	8.8	N	2	Mesenchymal_LHX9_ARX	Mesen_ovarianStroma
FCA_GND8047885_AGCGGTCGTAAGAGAG	1597	FCA_GND8047885	F81	female	CD45-	0.0365854	3444	0.0990807	0.0606932	1	8.8	N	2	Mesenchymal_LHX9_ARX	Mesen_ovarianStroma
FCA_GND8047885_AGCGGTCGTTAAGACA	1946	FCA_GND8047885	F81	female	CD45-	0.0239627	4507	0.238462	0.220217	1	8.8	N	0	Mesenchymal_GATA2_NR2F1	Mesenchymal_GATA2_NR2F1
FCA_GND8047885_AGCGGTCTCACATGCA	2827	FCA_GND8047885	F81	female	CD45-	0.0322368	7600	0.0512821	0.114094	1	8.8	N	1	Supporting	Supp_preGC_IIa
FCA_GND8047885_AGCGGTCTCACTCCTG	2388	FCA_GND8047885	F81	female	CD45-	0.0199179	6577	0.0819672	0.075718	1	8.8	N	0	Mesenchymal_GATA2_NR2F1	Mesenchymal_GATA2_NR2F1
FCA_GND8047885_AGCGGTCTCCCTCAGT	2001	FCA_GND8047885	F81	female	CD45-	0.0507266	3785	0.259259	0.140645	1	8.8	N	1	Supporting	Supp_preGC_I
FCA_GND8047885_AGCGGTCTCGCTTAGA	1833	FCA_GND8047885	F81	female	CD45-	0.061516	3430	0.0937808	0.104762	1	8.8	N	1	Supporting	Supp_preGC_I
FCA_GND8047885_AGCGGTCTCGTGGACC	2751	FCA_GND8047885	F81	female	CD45-	0.0602553	5875	0.176829	0.11577	1	8.8	N	1	Supporting	Supp_preGC_I
FCA_GND8047885_AGCGGTCTCTGTCAAG	2028	FCA_GND8047885	F81	female	CD45-	0.0343137	5304	0.0819672	0.0512821	1	8.8	N	5	Coel Epi	Supp_ovarianSurf
FCA_GND8047885_AGCGTATAGCACGCCT	1939	FCA_GND8047885	F81	female	CD45-	0.0254395	4835	0.0737564	0.0614786	1	8.8	N	2	Mesenchymal_LHX9_ARX	Mesen_ovarianStroma
FCA_GND8047885_AGCGTATAGCGACGTA	2236	FCA_GND8047885	F81	female	CD45-	0.066809	4685	0.132262	0.140645	1	8.8	N	1	Supporting	Supp_preGC_I
FCA_GND8047885_AGCGTATAGCGGATCA	3640	FCA_GND8047885	F81	female	CD45-	0.0368888	10247	0.489362	0.211909	1	8.8	N	1	Supporting	Supp_preGC_I
FCA_GND8047885_AGCGTATAGGCAATTA	2656	FCA_GND8047885	F81	female	CD45-	0.0349312	6613	0.176829	0.211909	1	8.8	N	1	Supporting	Supp_preGC_I
FCA_GND8047885_AGCGTATAGGCTAGGT	1463	FCA_GND8047885	F81	female	CD45-	0.0499249	2664	0.0393901	0.0718512	1	8.8	N	0	Mesenchymal_GATA2_NR2F1	Mesenchymal_GATA2_NR2F1
FCA_GND8047885_AGCGTATAGTCCTCCT	2496	FCA_GND8047885	F81	female	CD45-	0.0156984	6816	0.0614786	0.147458	1	8.8	N	1	Supporting	Supp_preGC_IIa
FCA_GND8047885_AGCGTATCACTATCTT	1991	FCA_GND8047885	F81	female	CD45-	0.0933751	3834	0.132262	0.0798206	1	8.8	N	1	Supporting	Supp_preGC_I
FCA_GND8047885_AGCGTATGTCACCCAG	2246	FCA_GND8047885	F81	female	CD45-	0.0128165	6320	0.075718	0.104762	1	8.8	N	1	Supporting	Supp_preGC_IIb
FCA_GND8047885_AGCGTATGTTCCGGCA	1942	FCA_GND8047885	F81	female	CD45-	0.0275029	5963	0.0718512	0.0682997	1	8.8	N	9	PV	PV
FCA_GND8047885_AGCGTATTCACCCGAG	1868	FCA_GND8047885	F81	female	CD45-	0.0958404	3558	0.0614786	0.126442	1	8.8	N	1	Supporting	Supp_preGC_I
FCA_GND8047885_AGCGTATTCTCCAGGG	1705	FCA_GND8047885	F81	female	CD45-	0.00902885	4541	0.0373134	0.0798206	1	8.8	N	1	Supporting	Supp_preGC_IIa
FCA_GND8047885_AGCGTATTCTCTGCTG	2423	FCA_GND8047885	F81	female	CD45-	0.0123549	8013	0.0281215	0.0614786	1	8.8	N	2	Mesenchymal_LHX9_ARX	Mesen_ovarianStroma
FCA_GND8047885_AGCGTCGCACTGAAGG	1245	FCA_GND8047885	F81	female	CD45-	0.0162636	2398	0.0864662	0.0614786	1	8.8	N	1	Supporting	Supp_preGC_IIa
FCA_GND8047885_AGCTCCTAGACATAAC	2688	FCA_GND8047885	F81	female	CD45-	0.041396	5387	0.0912621	0.11577	1	8.8	N	1	Supporting	Supp_preGC_I
FCA_GND8047885_AGCTCCTAGACTAAGT	2452	FCA_GND8047885	F81	female	CD45-	0.00514139	5446	0.0682005	0.0410827	1	8.8	N	1	Supporting	Supp_preGC_IIb
FCA_GND8047885_AGCTCCTAGAGTACAT	2642	FCA_GND8047885	F81	female	CD45-	0.0185003	6108	0.0426789	0.07	1	8.8	N	1	Supporting	Supp_preGC_IIb
FCA_GND8047885_AGCTCCTAGAGTCTGG	2078	FCA_GND8047885	F81	female	CD45-	0.0265043	4188	0.0118939	0.0181832	1	8.8	N	0	Mesenchymal_GATA2_NR2F1	Mesenchymal_GATA2_NR2F1
FCA_GND8047885_AGCTCCTAGCTAGGCA	2870	FCA_GND8047885	F81	female	CD45-	0.072215	6176	0.0718512	0.12093	1	8.8	N	1	Supporting	Supp_preGC_I
FCA_GND8047885_AGCTCCTCAAGCGATG	1271	FCA_GND8047885	F81	female	CD45-	0.0850869	2186	0.0888252	0.0937808	1	8.8	N	1	Supporting	Supp_preGC_I
FCA_GND8047885_AGCTCCTCAATCTGCA	1864	FCA_GND8047885	F81	female	CD45-	0.019758	4049	0.0102816	0.0130112	1	8.8	N	0	Mesenchymal_GATA2_NR2F1	Mesenchymal_GATA2_NR2F1
FCA_GND8047885_AGCTCCTCACCAGGCT	2536	FCA_GND8047885	F81	female	CD45-	0.0300035	5766	0.124555	0.114094	1	8.8	N	1	Supporting	Supp_preGC_IIb
FCA_GND8047885_AGCTCCTCACGACTCG	1173	FCA_GND8047885	F81	female	CD45-	0.046684	2699	0.0393901	0.0547235	1	8.8	N	2	Mesenchymal_LHX9_ARX	Mesen_testisStroma
FCA_GND8047885_AGCTCCTCAGGAATCG	3374	FCA_GND8047885	F81	female	CD45-	0.0283203	9216	0.189711	0.111055	1	8.8	N	1	Supporting	Supp_ovarianSurf
FCA_GND8047885_AGCTCCTCATCACGTA	2574	FCA_GND8047885	F81	female	CD45-	0.0865091	5248	0.0647482	0.140645	1	8.8	N	1	Supporting	Supp_preGC_I
FCA_GND8047885_AGCTCCTGTAAGGATT	3401	FCA_GND8047885	F81	female	CD45-	0.0213198	8865	0.15983	0.119188	1	8.8	N	1	Supporting	Supp_preGC_IIb
FCA_GND8047885_AGCTCCTGTCGATTGT	1652	FCA_GND8047885	F81	female	CD45-	0.0359023	4178	0.0449966	0.0718512	1	8.8	N	2	Mesenchymal_LHX9_ARX	Mesen_ovarianStroma
FCA_GND8047885_AGCTCCTGTCTTGCGG	2346	FCA_GND8047885	F81	female	CD45-	0.0487805	4756	0.0540146	0.0777385	1	8.8	N	1	Supporting	Supp_preGC_I
FCA_GND8047885_AGCTCCTGTGGGTCAA	2971	FCA_GND8047885	F81	female	CD45-	0.0436353	6921	0.311005	0.211909	1	8.8	N	1	Supporting	Supp_preGC_I
FCA_GND8047885_AGCTCCTTCAGCAACT	2184	FCA_GND8047885	F81	female	CD45-	0.0193995	4330	0.196694	0.220217	1	8.8	N	0	Mesenchymal_GATA2_NR2F1	Mesenchymal_GATA2_NR2F1
FCA_GND8047885_AGCTCCTTCATAGCAC	3023	FCA_GND8047885	F81	female	CD45-	0.056868	5926	0.104762	0.0798206	1	8.8	N	1	Supporting	Supp_sLGR5_female
FCA_GND8047885_AGCTCCTTCATTGCCC	2522	FCA_GND8047885	F81	female	CD45-	0.0221738	7802	0.0415584	0.0526316	1	8.8	N	2	Mesenchymal_LHX9_ARX	Mesen_ovarianStroma
FCA_GND8047885_AGCTCCTTCCAGGGCT	2303	FCA_GND8047885	F81	female	CD45-	0.023753	5473	0.0990807	0.106369	1	8.8	N	1	Supporting	Supp_preGC_IIa
FCA_GND8047885_AGCTCCTTCCGCAGTG	2301	FCA_GND8047885	F81	female	CD45-	0.0446219	4258	0.132262	0.104762	1	8.8	N	1	Supporting	Supp_preGC_I
FCA_GND8047885_AGCTCCTTCTAACTGG	2284	FCA_GND8047885	F81	female	CD45-	0.0285802	6543	0.0449966	0.0526316	1	8.8	N	2	Mesenchymal_LHX9_ARX	Mesen_ovarianStroma
FCA_GND8047885_AGCTCTCAGAACAATC	3295	FCA_GND8047885	F81	female	CD45-	0.0297301	7669	0.204082	0.0900437	1	8.8	N	1	Supporting	Supp_preGC_I
FCA_GND8047885_AGCTCTCAGATGTAAC	707	FCA_GND8047885	F81	female	CD45-	0.0369849	2839	0.0647482	0.07	1	8.8	N	10	Erythroid	Erythroid
FCA_GND8047885_AGCTCTCAGCTGTTCA	2634	FCA_GND8047885	F81	female	CD45-	0.0650607	5272	0.0798206	0.0526316	1	8.8	N	1	Supporting	Supp_preGC_I
FCA_GND8047885_AGCTCTCAGTCCAGGA	2914	FCA_GND8047885	F81	female	CD45-	0.0218727	8138	0.12093	0.15983	1	8.8	N	1	Supporting	Supp_sKITLG
FCA_GND8047885_AGCTCTCAGTCCATAC	2187	FCA_GND8047885	F81	female	CD45-	0.0450057	4355	0.0599078	0.104762	1	8.8	N	1	Supporting	Supp_preGC_I
FCA_GND8047885_AGCTCTCAGTCCTCCT	1951	FCA_GND8047885	F81	female	CD45-	0.0512318	3572	0.0912621	0.0977331	1	8.8	N	1	Supporting	Supp_preGC_I
FCA_GND8047885_AGCTCTCAGTGCGATG	1998	FCA_GND8047885	F81	female	CD45-	0.0755183	4052	0.114094	0.0798206	1	8.8	N	1	Supporting	Supp_sLGR5_female
FCA_GND8047885_AGCTCTCCAGATCCAT	2825	FCA_GND8047885	F81	female	CD45-	0.00829876	8194	0.0937808	0.111055	1	8.8	N	1	Supporting	Supp_preGC_IIa
FCA_GND8047885_AGCTCTCGTACGCTGC	2022	FCA_GND8047885	F81	female	CD45-	0.0190786	4298	0.0937808	0.123615	1	8.8	N	7	Endothelial	Endothelial
FCA_GND8047885_AGCTCTCGTATATCCG	1501	FCA_GND8047885	F81	female	CD45-	0.105758	2553	0.0426789	0.0841813	1	8.8	N	1	Supporting	Supp_preGC_I
FCA_GND8047885_AGCTCTCGTCCGAATT	2556	FCA_GND8047885	F81	female	CD45-	0.0556232	4926	0.154696	0.11577	1	8.8	N	1	Supporting	Supp_preGC_I
FCA_GND8047885_AGCTCTCGTGAGCGAT	1988	FCA_GND8047885	F81	female	CD45-	0.0235452	5224	0.0630915	0.0272981	1	8.8	N	0	Mesenchymal_GATA2_NR2F1	Mesen_dorsalMesentery
FCA_GND8047885_AGCTCTCGTGCACTTA	1633	FCA_GND8047885	F81	female	CD45-	0.0259705	3735	0.170877	0.07	1	8.8	N	2	Mesenchymal_LHX9_ARX	Mesen_ovarianStroma
FCA_GND8047885_AGCTCTCGTGGCGAAT	2214	FCA_GND8047885	F81	female	CD45-	0.0260326	5762	0.0841813	0.0963855	1	8.8	N	7	Endothelial	Endothelial
FCA_GND8047885_AGCTCTCGTTCGTGAT	2505	FCA_GND8047885	F81	female	CD45-	0.0532975	5216	0.0990807	0.109313	1	8.8	N	1	Supporting	Supp_preGC_I
FCA_GND8047885_AGCTCTCGTTGCCTCT	2000	FCA_GND8047885	F81	female	CD45-	0.0423882	3869	0.238462	0.140645	1	8.8	N	1	Supporting	Supp_preGC_I
FCA_GND8047885_AGCTCTCGTTTCGCTC	2363	FCA_GND8047885	F81	female	CD45-	0.0484444	4789	0.07	0.0777385	1	8.8	N	1	Supporting	Supp_preGC_I
FCA_GND8047885_AGCTCTCTCACCCGAG	2273	FCA_GND8047885	F81	female	CD45-	0.0104126	5186	0.104762	0.104762	1	8.8	N	1	Supporting	Supp_preGC_IIb
FCA_GND8047885_AGCTCTCTCAGTTGAC	2200	FCA_GND8047885	F81	female	CD45-	0.0412321	4123	0.0426789	0.0798206	1	8.8	N	1	Supporting	Supp_preGC_I
FCA_GND8047885_AGCTCTCTCCAGGGCT	3022	FCA_GND8047885	F81	female	CD45-	0.0307675	8743	0.0777385	0.0647482	1	8.8	N	0	Mesenchymal_GATA2_NR2F1	Mesenchymal_GATA2_NR2F1
FCA_GND8047885_AGCTCTCTCGGTTAAC	2141	FCA_GND8047885	F81	female	CD45-	0.0595533	4030	0.140645	0.112481	1	8.8	N	1	Supporting	Supp_preGC_I
FCA_GND8047885_AGCTCTCTCTGCGTAA	3976	FCA_GND8047885	F81	female	CD45-	0.0144277	11367	0.43038	0.211909	1	8.8	N	1	Supporting	Supp_preGC_I
FCA_GND8047885_AGCTTGAAGAGTGAGA	2651	FCA_GND8047885	F81	female	CD45-	0.0557122	6031	0.149798	0.140645	1	8.8	N	1	Supporting	Supp_preGC_I
FCA_GND8047885_AGCTTGAAGCTGAAAT	2200	FCA_GND8047885	F81	female	CD45-	0.0580874	4235	0.0647482	0.104762	1	8.8	N	1	Supporting	Supp_preGC_I
FCA_GND8047885_AGCTTGAAGGAGCGTT	1378	FCA_GND8047885	F81	female	CD45-	0.0893939	2640	0.128329	0.104762	1	8.8	N	1	Supporting	Supp_preGC_I
FCA_GND8047885_AGCTTGAAGTGCTGCC	2163	FCA_GND8047885	F81	female	CD45-	0.0639618	4190	0.104762	0.0841813	1	8.8	N	1	Supporting	Supp_sLGR5_female
FCA_GND8047885_AGCTTGACAAACGTGG	2181	FCA_GND8047885	F81	female	CD45-	0.0774631	4273	0.0888252	0.0664506	1	8.8	N	1	Supporting	Supp_sLGR5_female
FCA_GND8047885_AGCTTGACAATGCCAT	1416	FCA_GND8047885	F81	female	CD45-	0.047007	2723	0.110867	0.147458	1	8.8	N	1	Supporting	Supp_preGC_IIc
FCA_GND8047885_AGCTTGACAATTGCTG	2089	FCA_GND8047885	F81	female	CD45-	0.0451145	4411	0.270789	0.147458	1	8.8	N	1	Supporting	Supp_sKITLG
FCA_GND8047885_AGCTTGACACTTAACG	2212	FCA_GND8047885	F81	female	CD45-	0.0815311	4624	0.0415584	0.0664506	1	8.8	N	1	Supporting	Supp_sLGR5_female
FCA_GND8047885_AGCTTGACAGCCAATT	1560	FCA_GND8047885	F81	female	CD45-	0.0150029	3466	0.00824295	0.0130112	1	8.8	N	0	Mesenchymal_GATA2_NR2F1	Mesenchymal_GATA2_NR2F1
FCA_GND8047885_AGCTTGACAGTATGCT	2067	FCA_GND8047885	F81	female	CD45-	0.0309236	4883	0.0819672	0.075718	1	8.8	N	0	Mesenchymal_GATA2_NR2F1	Mesen_ovarianStroma
FCA_GND8047885_AGCTTGACATAACCTG	2598	FCA_GND8047885	F81	female	CD45-	0.0483692	5396	0.0249187	0.0937808	1	8.8	N	1	Supporting	Supp_sLGR5_female
FCA_GND8047885_AGCTTGACATATACGC	2389	FCA_GND8047885	F81	female	CD45-	0.0650233	5152	0.117446	0.126442	1	8.8	N	1	Supporting	Supp_preGC_I
FCA_GND8047885_AGCTTGACATCATCCC	1933	FCA_GND8047885	F81	female	CD45-	0.0183732	5606	0.0373134	0.0614786	1	8.8	N	1	Supporting	Supp_preGC_IIa
FCA_GND8047885_AGCTTGAGTACGACCC	2022	FCA_GND8047885	F81	female	CD45-	0.056899	4921	0.101871	0.0888252	1	8.8	N	5	Coel Epi	Supp_ovarianSurf
FCA_GND8047885_AGCTTGAGTCGTGGCT	1280	FCA_GND8047885	F81	female	CD45-	0.018591	3066	0.0449966	0.0798206	1	8.8	N	1	Supporting	Supp_preGC_IIb
FCA_GND8047885_AGCTTGAGTTGGTGGA	2076	FCA_GND8047885	F81	female	CD45-	0.0135755	5230	0.075718	0.104762	1	8.8	N	1	Supporting	Supp_preGC_IIa
FCA_GND8047885_AGCTTGATCCTACAGA	1716	FCA_GND8047885	F81	female	CD45-	0.0743607	2972	0.0682005	0.15983	1	8.8	N	1	Supporting	Supp_preGC_I
FCA_GND8047885_AGCTTGATCGCATGGC	2812	FCA_GND8047885	F81	female	CD45-	0.00545194	6970	0.0334129	0.0718512	1	8.8	N	1	Supporting	Supp_preGC_IIb
FCA_GND8047885_AGGCCACAGAGCTGCA	2602	FCA_GND8047885	F81	female	CD45-	0.0642955	5117	0.145119	0.0664506	1	8.8	N	1	Supporting	Supp_preGC_I
FCA_GND8047885_AGGCCACAGGTGCACA	3028	FCA_GND8047885	F81	female	CD45-	0.0250754	7298	0.248509	0.147458	1	8.8	N	1	Supporting	Supp_preGC_I
FCA_GND8047885_AGGCCACCAAAGTGCG	1864	FCA_GND8047885	F81	female	CD45-	0.0563767	4736	0.0599078	0.0614786	1	8.8	N	9	PV	PV
FCA_GND8047885_AGGCCACCACGGTAAG	2568	FCA_GND8047885	F81	female	CD45-	0.0263568	7057	0.0819672	0.0777385	1	8.8	N	5	Coel Epi	Supp_ovarianSurf
FCA_GND8047885_AGGCCACCAGTAAGAT	3123	FCA_GND8047885	F81	female	CD45-	0.029036	7749	0.149798	0.0900437	1	8.8	N	1	Supporting	Supp_preGC_I
FCA_GND8047885_AGGCCACCATCCGTGG	2370	FCA_GND8047885	F81	female	CD45-	0.0134603	4829	0.140645	0.15983	1	8.8	N	1	Supporting	Supp_preGC_IIb
FCA_GND8047885_AGGCCACCATCTCCCA	2448	FCA_GND8047885	F81	female	CD45-	0.029874	6427	0.211909	0.0415584	1	8.8	N	1	Supporting	Supp_preGC_IIb
FCA_GND8047885_AGGCCACGTTACGCGC	2114	FCA_GND8047885	F81	female	CD45-	0.0334434	4844	0.0153551	0.0181832	1	8.8	N	0	Mesenchymal_GATA2_NR2F1	Mesenchymal_GATA2_NR2F1
FCA_GND8047885_AGGCCACTCAAGGCTT	3185	FCA_GND8047885	F81	female	CD45-	0.0414081	7414	0.132262	0.0798206	1	8.8	N	1	Supporting	Supp_preGC_I
FCA_GND8047885_AGGCCACTCAGAGCTT	1888	FCA_GND8047885	F81	female	CD45-	0.0516077	3701	0.0583776	0.0554324	1	8.8	N	1	Supporting	Supp_preGC_I
FCA_GND8047885_AGGCCACTCAGGATCT	2071	FCA_GND8047885	F81	female	CD45-	0.0242638	5399	0.0568862	0.0526316	1	8.8	N	2	Mesenchymal_LHX9_ARX	Mesen_ovarianStroma
FCA_GND8047885_AGGCCACTCCCATTTA	1293	FCA_GND8047885	F81	female	CD45-	0.0513232	2494	0.170877	0.0599078	1	8.8	N	1	Supporting	Supp_preGC_I
FCA_GND8047885_AGGCCACTCGTTTAGG	3048	FCA_GND8047885	F81	female	CD45-	0.026132	7730	0.189711	0.0900437	1	8.8	N	1	Supporting	Supp_preGC_IIa
FCA_GND8047885_AGGCCACTCGTTTATC	1974	FCA_GND8047885	F81	female	CD45-	0.0247049	3643	0.0841813	0.0777385	1	8.8	N	1	Supporting	Supp_preGC_I
FCA_GND8047885_AGGCCGTAGATATACG	2408	FCA_GND8047885	F81	female	CD45-	0.0579979	4845	0.128329	0.12093	1	8.8	N	1	Supporting	Supp_preGC_I
FCA_GND8047885_AGGCCGTAGCGATCCC	1936	FCA_GND8047885	F81	female	CD45-	0.0276345	5428	0.107759	0.0937808	1	8.8	N	0	Mesenchymal_GATA2_NR2F1	Mesenchymal_GATA2_NR2F1
FCA_GND8047885_AGGCCGTAGCTCCTTC	3152	FCA_GND8047885	F81	female	CD45-	0.0639588	7583	0.101871	0.147458	1	8.8	N	1	Supporting	Supp_preGC_I
FCA_GND8047885_AGGCCGTAGTTATCGC	2458	FCA_GND8047885	F81	female	CD45-	0.0434949	5219	0.140645	0.12093	1	8.8	N	1	Supporting	Supp_preGC_I
FCA_GND8047885_AGGCCGTCACCCAGTG	3511	FCA_GND8047885	F81	female	CD45-	0.035229	11922	0.0373134	0.0718512	1	8.8	N	0	Mesenchymal_GATA2_NR2F1	Mesenchymal_GATA2_NR2F1
FCA_GND8047885_AGGCCGTCAGTCCTTC	2344	FCA_GND8047885	F81	female	CD45-	0.0605046	4479	0.0324867	0.0798206	1	8.8	N	1	Supporting	Supp_preGC_I
FCA_GND8047885_AGGCCGTGTCAAAGAT	1913	FCA_GND8047885	F81	female	CD45-	0.0580752	3616	0.110867	0.112481	1	8.8	N	1	Supporting	Supp_preGC_I
FCA_GND8047885_AGGCCGTGTCCTAGCG	1940	FCA_GND8047885	F81	female	CD45-	0.0477836	4918	0.0777385	0.114094	1	8.8	N	1	Supporting	Supp_preGC_IIa
FCA_GND8047885_AGGCCGTTCCCGGATG	2851	FCA_GND8047885	F81	female	CD45-	0.0214812	8007	0.0841813	0.128329	1	8.8	N	0	Mesenchymal_GATA2_NR2F1	Mesenchymal_GATA2_NR2F1
FCA_GND8047885_AGGGAGTAGACAAAGG	1864	FCA_GND8047885	F81	female	CD45-	0.0303111	3761	0.124555	0.0737564	1	8.8	N	1	Supporting	Supp_sKITLG
FCA_GND8047885_AGGGAGTAGACGCACA	2187	FCA_GND8047885	F81	female	CD45-	0.0510248	4684	0.12093	0.110867	1	8.8	N	1	Supporting	Supp_preGC_I
FCA_GND8047885_AGGGAGTAGCCAGGAT	2015	FCA_GND8047885	F81	female	CD45-	0.0623069	3884	0.140645	0.15983	1	8.8	N	1	Supporting	Supp_preGC_I
FCA_GND8047885_AGGGAGTAGTACGCCC	2357	FCA_GND8047885	F81	female	CD45-	0.0285578	6268	0.0568862	0.107759	1	8.8	N	1	Supporting	Supp_preGC_IIa
FCA_GND8047885_AGGGAGTAGTAGCCGA	2060	FCA_GND8047885	F81	female	CD45-	0.0308801	5829	0.0777385	0.0526316	1	8.8	N	2	Mesenchymal_LHX9_ARX	Mesen_ovarianStroma
FCA_GND8047885_AGGGAGTAGTTGTAGA	3041	FCA_GND8047885	F81	female	CD45-	0.0208224	7636	0.107759	0.128329	1	8.8	N	1	Supporting	Supp_preGC_IIb
FCA_GND8047885_AGGGAGTCACCGTTGG	2298	FCA_GND8047885	F81	female	CD45-	0.0723192	4812	0.0737564	0.0664506	1	8.8	N	1	Supporting	Supp_preGC_I
FCA_GND8047885_AGGGAGTCACGAAATA	2750	FCA_GND8047885	F81	female	CD45-	0.0263126	8247	0.61039	0.0912621	1	8.8	N	9	PV	PV
FCA_GND8047885_AGGGAGTCACGTCTCT	1796	FCA_GND8047885	F81	female	CD45-	0.00952582	4724	0.034358	0.0614786	1	8.8	N	5	Coel Epi	Supp_preGC_IIa
FCA_GND8047885_AGGGAGTCAGGTTTCA	2457	FCA_GND8047885	F81	female	CD45-	0.0371107	6036	0.12093	0.110867	1	8.8	N	1	Supporting	Supp_preGC_IIb
FCA_GND8047885_AGGGAGTCATCTACGA	2016	FCA_GND8047885	F81	female	CD45-	0.0676521	3518	0.136364	0.112481	1	8.8	N	1	Supporting	Supp_preGC_I
FCA_GND8047885_AGGGAGTCATCTATGG	1839	FCA_GND8047885	F81	female	CD45-	0.0469734	4130	0.0990807	0.07	1	8.8	N	2	Mesenchymal_LHX9_ARX	Mesen_ovarianStroma
FCA_GND8047885_AGGGAGTCATGCGCAC	1778	FCA_GND8047885	F81	female	CD45-	0.0419179	3483	0.0583776	0.104762	1	8.8	N	1	Supporting	Supp_preGC_I
FCA_GND8047885_AGGGAGTGTACGACCC	1550	FCA_GND8047885	F81	female	CD45-	0.0208512	3501	0.0718512	0.109313	1	8.8	N	1	Supporting	Supp_preGC_IIa
FCA_GND8047885_AGGGAGTGTAGCTAAA	1207	FCA_GND8047885	F81	female	CD45-	0.0626398	3129	0.0888252	0.0547235	1	8.8	N	2	Mesenchymal_LHX9_ARX	Mesen_ovarianStroma
FCA_GND8047885_AGGGAGTGTGTGGTTT	1625	FCA_GND8047885	F81	female	CD45-	0.0201789	4361	0.0583776	0.0682005	1	8.8	N	1	Supporting	Supp_preGC_IIa
FCA_GND8047885_AGGGAGTGTTAAAGTG	1341	FCA_GND8047885	F81	female	CD45-	0.0476191	2919	0.0864662	0.0798206	1	8.8	N	1	Supporting	Supp_preGC_IIa
FCA_GND8047885_AGGGAGTGTTAAGTAG	1298	FCA_GND8047885	F81	female	CD45-	0.0292268	2703	0.0172159	0.0334129	1	8.8	N	0	Mesenchymal_GATA2_NR2F1	Mesenchymal_GATA2_NR2F1
FCA_GND8047885_AGGGAGTTCACGGTTA	1899	FCA_GND8047885	F81	female	CD45-	0.0202171	4699	0.110867	0.0798206	1	8.8	N	1	Supporting	Supp_preGC_IIa
FCA_GND8047885_AGGGAGTTCAGTTAGC	1695	FCA_GND8047885	F81	female	CD45-	0.0303169	4354	0.128329	0.0606932	1	8.8	N	2	Mesenchymal_LHX9_ARX	Mesen_ovarianStroma
FCA_GND8047885_AGGGAGTTCCATTCTA	2555	FCA_GND8047885	F81	female	CD45-	0.0506375	5490	0.140645	0.109313	1	8.8	N	1	Supporting	Supp_sLGR5_female
FCA_GND8047885_AGGGAGTTCCCTGACT	1322	FCA_GND8047885	F81	female	CD45-	0.0206028	2621	0.0205339	0.0334129	1	8.8	N	0	Mesenchymal_GATA2_NR2F1	Mesen_dorsalMesentery
FCA_GND8047885_AGGGAGTTCTCTGAGA	2885	FCA_GND8047885	F81	female	CD45-	0.0211414	7237	0.0682005	0.128329	1	8.8	N	1	Supporting	Supp_preGC_IIb
FCA_GND8047885_AGGGATGAGAGAACAG	2028	FCA_GND8047885	F81	female	CD45-	0.00211551	4727	0.0212325	0.0474372	1	8.8	N	1	Supporting	Supp_preGC_IIb
FCA_GND8047885_AGGGATGAGCTGGAAC	1797	FCA_GND8047885	F81	female	CD45-	0.0566539	3389	0.140645	0.0841813	1	8.8	N	1	Supporting	Supp_preGC_I
FCA_GND8047885_AGGGATGCAGCTGCTG	1026	FCA_GND8047885	F81	female	CD45-	0.0252505	2495	0.0178571	0.034358	1	8.8	N	0	Mesenchymal_GATA2_NR2F1	Mesen_dorsalMesentery
FCA_GND8047885_AGGGATGCATTATCTC	2566	FCA_GND8047885	F81	female	CD45-	0.0517267	6805	0.07	0.119188	1	8.8	N	1	Supporting	Supp_preGC_IIa
FCA_GND8047885_AGGGATGCATTCTTAC	2194	FCA_GND8047885	F81	female	CD45-	0.0535714	4760	0.0526316	0.0937808	1	8.8	N	1	Supporting	Supp_sLGR5_female
FCA_GND8047885_AGGGATGGTATCTGCA	2918	FCA_GND8047885	F81	female	CD45-	0.0205796	8212	0.117446	0.119188	1	8.8	N	1	Supporting	Supp_preGC_IIb
FCA_GND8047885_AGGGATGGTCACACGC	2261	FCA_GND8047885	F81	female	CD45-	0.0281042	5871	0.110867	0.114094	1	8.8	N	1	Supporting	Supp_preGC_IIa
FCA_GND8047885_AGGGATGGTCCCTTGT	1702	FCA_GND8047885	F81	female	CD45-	0.0403574	3246	0.034358	0.104762	1	8.8	N	1	Supporting	Supp_preGC_I
FCA_GND8047885_AGGGATGGTGCCTGTG	2188	FCA_GND8047885	F81	female	CD45-	0.108931	4434	0.0449966	0.0664506	1	8.8	N	1	Supporting	Supp_sLGR5_female
FCA_GND8047885_AGGGATGTCCGCAGTG	2564	FCA_GND8047885	F81	female	CD45-	0.0322222	7200	0.128329	0.0737564	1	8.8	N	2	Mesenchymal_LHX9_ARX	Mesen_ovarianStroma
FCA_GND8047885_AGGGTGAAGTGTTGAA	2710	FCA_GND8047885	F81	female	CD45-	0.0373456	6962	0.0888252	0.15983	1	8.8	N	1	Supporting	Supp_preGC_I
FCA_GND8047885_AGGGTGAAGTTATCGC	2731	FCA_GND8047885	F81	female	CD45-	0.0388156	6518	0.0614786	0.0900437	1	8.8	N	1	Supporting	Supp_preGC_IIc
FCA_GND8047885_AGGGTGACAATGGTCT	2561	FCA_GND8047885	F81	female	CD45-	0.0345414	5877	0.524528	0.211909	1	8.8	N	1	Supporting	Supp_preGC_I
FCA_GND8047885_AGGGTGACACGGTAGA	2019	FCA_GND8047885	F81	female	CD45-	0.0281719	4934	0.0737564	0.104762	1	8.8	N	1	Supporting	Supp_preGC_IIa
FCA_GND8047885_AGGGTGACAGGGTACA	2427	FCA_GND8047885	F81	female	CD45-	0.0130371	5446	0.238462	0.211909	1	8.8	N	1	Supporting	Supp_preGC_I
FCA_GND8047885_AGGGTGACATGCAACT	2321	FCA_GND8047885	F81	female	CD45-	0.00580458	6202	0.0353228	0.0614786	1	8.8	N	1	Supporting	Supp_preGC_IIa
FCA_GND8047885_AGGGTGAGTCGCTTTC	1812	FCA_GND8047885	F81	female	CD45-	0.0221481	4199	0.132262	0.0798206	1	8.8	N	1	Supporting	Supp_preGC_IIa
FCA_GND8047885_AGGGTGAGTGTTAAGA	2186	FCA_GND8047885	F81	female	CD45-	0.0542802	4182	0.0526316	0.0526316	1	8.8	N	1	Supporting	Supp_preGC_I
FCA_GND8047885_AGGGTGAGTTCACGGC	2181	FCA_GND8047885	F81	female	CD45-	0.0502435	4518	0.165217	0.0798206	1	8.8	N	1	Supporting	Supp_preGC_I
FCA_GND8047885_AGGGTGAGTTGTTTGG	1860	FCA_GND8047885	F81	female	CD45-	0.0936955	4013	0.0373134	0.0900437	1	8.8	N	1	Supporting	Supp_preGC_I
FCA_GND8047885_AGGGTGATCCATGAGT	2005	FCA_GND8047885	F81	female	CD45-	0.0482933	3955	0.0937808	0.112481	1	8.8	N	1	Supporting	Supp_preGC_I
FCA_GND8047885_AGGGTGATCTAACTCT	2382	FCA_GND8047885	F81	female	CD45-	0.0570406	4751	0.165217	0.112481	1	8.8	N	1	Supporting	Supp_preGC_I
FCA_GND8047885_AGGGTGATCTCGGACG	2750	FCA_GND8047885	F81	female	CD45-	0.0507357	6524	0.311005	0.0900437	1	8.8	N	1	Supporting	Supp_preGC_I
FCA_GND8047885_AGGGTGATCTGATACG	2456	FCA_GND8047885	F81	female	CD45-	0.0599848	5268	0.0568862	0.0664506	1	8.8	N	1	Supporting	Supp_sLGR5_female
FCA_GND8047885_AGGGTGATCTGTCAAG	2143	FCA_GND8047885	F81	female	CD45-	0.0317337	5168	0.132262	0.147458	1	8.8	N	1	Supporting	Supp_preGC_IIa
FCA_GND8047885_AGGTCATAGATATGGT	2250	FCA_GND8047885	F81	female	CD45-	0.0805646	4605	0.0990807	0.0664506	1	8.8	N	1	Supporting	Supp_sLGR5_female
FCA_GND8047885_AGGTCATAGGATGCGT	1876	FCA_GND8047885	F81	female	CD45-	0.0298582	4019	0.128329	0.0876457	1	8.8	N	2	Mesenchymal_LHX9_ARX	Mesen_ovarianStroma
FCA_GND8047885_AGGTCATAGTTGTAGA	1845	FCA_GND8047885	F81	female	CD45-	0.00805153	4347	0.0315789	0.0480507	1	8.8	N	1	Supporting	Supp_preGC_IIa
FCA_GND8047885_AGGTCATCACCGTTGG	2717	FCA_GND8047885	F81	female	CD45-	0.0092703	7551	0.0630915	0.0718512	1	8.8	N	1	Supporting	Supp_preGC_IIb
FCA_GND8047885_AGGTCATGTAAATGTG	2303	FCA_GND8047885	F81	female	CD45-	0.0308383	6907	0.0718512	0.0526316	1	8.8	N	2	Mesenchymal_LHX9_ARX	Mesen_ovarianStroma
FCA_GND8047885_AGGTCATGTCGGCACT	1221	FCA_GND8047885	F81	female	CD45-	0.0838678	2027	0.107759	0.0599078	1	8.8	N	1	Supporting	Supp_preGC_I
FCA_GND8047885_AGGTCATGTCTAAACC	2823	FCA_GND8047885	F81	female	CD45-	0.029692	7241	0.0864662	0.114094	1	8.8	N	1	Supporting	Supp_preGC_IIa
FCA_GND8047885_AGGTCATGTTTGTGTG	2132	FCA_GND8047885	F81	female	CD45-	0.0513619	3855	0.0963855	0.0554324	1	8.8	N	1	Supporting	Supp_preGC_I
FCA_GND8047885_AGGTCATTCCTTTCTC	2916	FCA_GND8047885	F81	female	CD45-	0.0650075	6630	0.0512821	0.0937808	1	8.8	N	1	Supporting	Supp_sLGR5_female
FCA_GND8047885_AGGTCATTCGTGGGAA	2334	FCA_GND8047885	F81	female	CD45-	0.0748766	4661	0.101871	0.126442	1	8.8	N	1	Supporting	Supp_preGC_I
FCA_GND8047885_AGGTCCGAGAAGGGTA	1892	FCA_GND8047885	F81	female	CD45-	0.0495398	3694	0.0599078	0.104762	1	8.8	N	1	Supporting	Supp_preGC_I
FCA_GND8047885_AGGTCCGAGCACAGGT	1062	FCA_GND8047885	F81	female	CD45-	0.071792	1769	0.0841813	0.110867	1	8.8	N	1	Supporting	Supp_preGC_I
FCA_GND8047885_AGGTCCGAGCTAGTTC	1904	FCA_GND8047885	F81	female	CD45-	0.0568828	3516	0.114094	0.104762	1	8.8	N	1	Supporting	Supp_preGC_I
FCA_GND8047885_AGGTCCGAGTACGCCC	2292	FCA_GND8047885	F81	female	CD45-	0.0331074	6343	0.0718512	0.114094	1	8.8	N	1	Supporting	Supp_preGC_IIa
FCA_GND8047885_AGGTCCGAGTGTACTC	2370	FCA_GND8047885	F81	female	CD45-	0.0308683	6058	0.0718512	0.114094	1	8.8	N	1	Supporting	Supp_preGC_IIa
FCA_GND8047885_AGGTCCGCACGCATCG	2168	FCA_GND8047885	F81	female	CD45-	0.0411457	4399	0.110867	0.0777385	1	8.8	N	1	Supporting	Supp_preGC_I
FCA_GND8047885_AGGTCCGCAGCTGCAC	1107	FCA_GND8047885	F81	female	CD45-	0.0630517	3172	0.117446	0.117446	1	8.8	N	9	PV	PV
FCA_GND8047885_AGGTCCGGTACAGTTC	2270	FCA_GND8047885	F81	female	CD45-	0.0443238	4422	0.128329	0.109313	1	8.8	N	1	Supporting	Supp_sLGR5_female
FCA_GND8047885_AGGTCCGGTATTCGTG	2027	FCA_GND8047885	F81	female	CD45-	0.0599852	4051	0.176829	0.15983	1	8.8	N	1	Supporting	Supp_preGC_I
FCA_GND8047885_AGGTCCGGTCATGCAT	2581	FCA_GND8047885	F81	female	CD45-	0.0259344	6555	0.0798206	0.0512821	1	8.8	N	5	Coel Epi	Supp_ovarianSurf
FCA_GND8047885_AGGTCCGGTGACAAAT	1789	FCA_GND8047885	F81	female	CD45-	0.0266802	4910	0.0415584	0.075718	1	8.8	N	0	Mesenchymal_GATA2_NR2F1	Mesen_dorsalMesentery
FCA_GND8047885_AGGTCCGTCACGACTA	3038	FCA_GND8047885	F81	female	CD45-	0.054809	6623	0.128329	0.11577	1	8.8	N	1	Supporting	Supp_preGC_I
FCA_GND8047885_AGGTCCGTCCAAAGTC	2452	FCA_GND8047885	F81	female	CD45-	0.0303309	5440	0.15983	0.075718	1	8.8	N	1	Supporting	Supp_preGC_IIa
FCA_GND8047885_AGGTCCGTCCACGTGG	1637	FCA_GND8047885	F81	female	CD45-	0.0496408	3062	0.0256971	0.0554324	1	8.8	N	1	Supporting	Supp_preGC_I
FCA_GND8047885_AGTAGTCAGAGAACAG	2063	FCA_GND8047885	F81	female	CD45-	0.0553606	5130	0.183099	0.15983	1	8.8	N	2	Mesenchymal_LHX9_ARX	Mesen_ovarianStroma
FCA_GND8047885_AGTAGTCAGCAGGTCA	2462	FCA_GND8047885	F81	female	CD45-	0.00673014	6092	0.176829	0.110867	1	8.8	N	1	Supporting	Supp_preGC_IIb
FCA_GND8047885_AGTAGTCAGGAGTACC	1954	FCA_GND8047885	F81	female	CD45-	0.0651242	4668	0.0912621	0.0787796	1	8.8	N	2	Mesenchymal_LHX9_ARX	Mesen_ovarianStroma
FCA_GND8047885_AGTAGTCAGGAGTAGA	1944	FCA_GND8047885	F81	female	CD45-	0.0500596	5034	0.0647482	0.0526316	1	8.8	N	2	Mesenchymal_LHX9_ARX	Mesen_ovarianStroma
FCA_GND8047885_AGTAGTCCAAACCTAC	1555	FCA_GND8047885	F81	female	CD45-	0.0232915	3907	0.0614786	0.0798206	1	8.8	N	1	Supporting	Supp_preGC_IIa
FCA_GND8047885_AGTAGTCCACCCATGG	2526	FCA_GND8047885	F81	female	CD45-	0.0414473	7407	0.0568862	0.075718	1	8.8	N	0	Mesenchymal_GATA2_NR2F1	Mesenchymal_GATA2_NR2F1
FCA_GND8047885_AGTAGTCGTCTAAACC	1819	FCA_GND8047885	F81	female	CD45-	0.0538485	3287	0.124555	0.110867	1	8.8	N	1	Supporting	Supp_preGC_I
FCA_GND8047885_AGTAGTCGTGGTGTAG	1720	FCA_GND8047885	F81	female	CD45-	0.0589562	3104	0.114094	0.15983	1	8.8	N	1	Supporting	Supp_preGC_I
FCA_GND8047885_AGTAGTCGTGTTAAGA	1670	FCA_GND8047885	F81	female	CD45-	0.0513834	3542	0.189711	0.0798206	1	8.8	N	1	Supporting	Supp_preGC_IIa
FCA_GND8047885_AGTAGTCGTTGGACCC	1941	FCA_GND8047885	F81	female	CD45-	0.0495028	4525	0.075718	0.0841813	1	8.8	N	1	Supporting	Supp_preGC_I
FCA_GND8047885_AGTAGTCGTTTAGCTG	2182	FCA_GND8047885	F81	female	CD45-	0.0183012	5027	0.136364	0.0937808	1	8.8	N	1	Supporting	Supp_preGC_IIb
FCA_GND8047885_AGTAGTCTCACCAGGC	3406	FCA_GND8047885	F81	female	CD45-	0.0681196	8397	0.154696	0.11577	1	8.8	N	1	Supporting	Supp_preGC_I
FCA_GND8047885_AGTAGTCTCAGCTCGG	1587	FCA_GND8047885	F81	female	CD45-	0.0259387	4048	0.0599078	0.0718512	1	8.8	N	2	Mesenchymal_LHX9_ARX	Mesen_testisStroma
FCA_GND8047885_AGTAGTCTCATCGGAT	2245	FCA_GND8047885	F81	female	CD45-	0.0400431	4645	0.0264901	0.0664506	1	8.8	N	1	Supporting	Supp_sLGR5_female
FCA_GND8047885_AGTAGTCTCTAAGCCA	1988	FCA_GND8047885	F81	female	CD45-	0.0327095	5931	0.0718512	0.0737564	1	8.8	N	0	Mesenchymal_GATA2_NR2F1	Mesen_dorsalMesentery
FCA_GND8047885_AGTAGTCTCTACTATC	2607	FCA_GND8047885	F81	female	CD45-	0.0597169	6782	0.0798206	0.114094	1	8.8	N	1	Supporting	Supp_preGC_IIb
FCA_GND8047885_AGTAGTCTCTTCCTTC	2271	FCA_GND8047885	F81	female	CD45-	0.0164681	5708	0.128329	0.0937808	1	8.8	N	1	Supporting	Supp_preGC_IIb
FCA_GND8047885_AGTCTTTAGGTGTGGT	2527	FCA_GND8047885	F81	female	CD45-	0.0268707	5880	0.107759	0.075718	1	8.8	N	1	Supporting	Supp_preGC_I
FCA_GND8047885_AGTCTTTAGTCGCCGT	2833	FCA_GND8047885	F81	female	CD45-	0.0314441	7728	0.114094	0.0900437	1	8.8	N	1	Supporting	Supp_preGC_IIc
FCA_GND8047885_AGTCTTTAGTGAATTG	2983	FCA_GND8047885	F81	female	CD45-	0.0559581	7452	0.145119	0.0900437	1	8.8	N	1	Supporting	Supp_preGC_I
FCA_GND8047885_AGTCTTTCAAAGGAAG	1726	FCA_GND8047885	F81	female	CD45-	0.0329022	4407	0.0647482	0.0876457	1	8.8	N	2	Mesenchymal_LHX9_ARX	Mesen_ovarianStroma
FCA_GND8047885_AGTCTTTCAAGCGCTC	2342	FCA_GND8047885	F81	female	CD45-	0.0294487	5569	0.117446	0.114094	1	8.8	N	1	Supporting	Supp_preGC_IIa
FCA_GND8047885_AGTCTTTCACAGATTC	2271	FCA_GND8047885	F81	female	CD45-	0.0771877	4651	0.0864662	0.0841813	1	8.8	N	1	Supporting	Supp_preGC_I
FCA_GND8047885_AGTCTTTCACCCATTC	1766	FCA_GND8047885	F81	female	CD45-	0.087986	3421	0.0912621	0.112481	1	8.8	N	1	Supporting	Supp_preGC_I
FCA_GND8047885_AGTCTTTCAGGGTATG	2576	FCA_GND8047885	F81	female	CD45-	0.0175333	6616	0.154696	0.110867	1	8.8	N	1	Supporting	Supp_preGC_IIb
FCA_GND8047885_AGTCTTTGTATAGGTA	3945	FCA_GND8047885	F81	female	CD45-	0.0436649	9550	0.154696	0.123615	1	8.8	N	7	Endothelial	Endothelial
FCA_GND8047885_AGTCTTTGTCTAGCCG	1856	FCA_GND8047885	F81	female	CD45-	0.0614088	3322	0.0864662	0.0526316	1	8.8	N	1	Supporting	Supp_preGC_I
FCA_GND8047885_AGTCTTTGTGTGCGTC	1855	FCA_GND8047885	F81	female	CD45-	0.0336134	4522	0.107759	0.0937808	1	8.8	N	0	Mesenchymal_GATA2_NR2F1	Mesenchymal_GATA2_NR2F1
FCA_GND8047885_AGTCTTTGTTCACCTC	2068	FCA_GND8047885	F81	female	CD45-	0.0362104	4391	0.0383407	0.0512821	1	8.8	N	5	Coel Epi	Supp_ovarianSurf
FCA_GND8047885_AGTCTTTTCACATAGC	2965	FCA_GND8047885	F81	female	CD45-	0.0530345	7184	0.183099	0.211909	1	8.8	N	1	Supporting	Supp_preGC_I
FCA_GND8047885_AGTCTTTTCACCAGGC	2696	FCA_GND8047885	F81	female	CD45-	0.00708177	7484	0.0499648	0.0547235	1	8.8	N	1	Supporting	Supp_preGC_IIb
FCA_GND8047885_AGTCTTTTCACTCTTA	2140	FCA_GND8047885	F81	female	CD45-	0.0482011	4336	0.0474227	0.140645	1	8.8	N	1	Supporting	Supp_preGC_I
FCA_GND8047885_AGTCTTTTCGTCCGTT	2413	FCA_GND8047885	F81	female	CD45-	0.0171617	6060	0.0540146	0.0547235	1	8.8	N	1	Supporting	Supp_preGC_IIb
FCA_GND8047885_AGTCTTTTCTTGAGAC	2301	FCA_GND8047885	F81	female	CD45-	0.0659798	5047	0.0990807	0.0664506	1	8.8	N	1	Supporting	Supp_sLGR5_female
FCA_GND8047885_AGTGAGGAGGCCATAG	2048	FCA_GND8047885	F81	female	CD45-	0.035687	5240	0.0990807	0.114094	1	8.8	N	1	Supporting	Supp_preGC_IIa
FCA_GND8047885_AGTGAGGAGGGAGTAA	1748	FCA_GND8047885	F81	female	CD45-	0.0465175	3934	0.0912621	0.165217	1	8.8	N	7	Endothelial	Endothelial
FCA_GND8047885_AGTGAGGCAATAAGCA	1030	FCA_GND8047885	F81	female	CD45-	0.0706837	2589	0.0461957	0.0606932	1	8.8	N	2	Mesenchymal_LHX9_ARX	Mesen_testisStroma
FCA_GND8047885_AGTGAGGGTAAATGAC	2318	FCA_GND8047885	F81	female	CD45-	0.0489028	4785	0.0937808	0.0937808	1	8.8	N	1	Supporting	Supp_preGC_I
FCA_GND8047885_AGTGAGGGTCTAGGTT	1358	FCA_GND8047885	F81	female	CD45-	0.0899763	2534	0.0664506	0.0664506	1	8.8	N	1	Supporting	Supp_sLGR5_female
FCA_GND8047885_AGTGAGGGTGCGATAG	2658	FCA_GND8047885	F81	female	CD45-	0.0166667	6660	0.132262	0.0682005	1	8.8	N	1	Supporting	Supp_preGC_IIa
FCA_GND8047885_AGTGAGGGTGGTGTAG	3338	FCA_GND8047885	F81	female	CD45-	0.0434213	9166	0.405405	0.211909	1	8.8	N	1	Supporting	Supp_preGC_I
FCA_GND8047885_AGTGAGGTCCTTTCTC	2627	FCA_GND8047885	F81	female	CD45-	0.00863867	6714	0.0241546	0.07	1	8.8	N	1	Supporting	Supp_preGC_IIb
FCA_GND8047885_AGTGGGAAGAATGTTG	2001	FCA_GND8047885	F81	female	CD45-	0.0250912	4384	0.211909	0.114094	1	8.8	N	1	Supporting	Supp_preGC_IIa
FCA_GND8047885_AGTGGGAAGTCCGTAT	2902	FCA_GND8047885	F81	female	CD45-	0.0337735	7195	0.524528	0.107759	1	8.8	N	1	Supporting	Supp_preGC_I
FCA_GND8047885_AGTGGGAAGTGCAAGC	2183	FCA_GND8047885	F81	female	CD45-	0.015425	6094	0.12093	0.0606932	1	8.8	N	5	Coel Epi	Supp_ovarianSurf
FCA_GND8047885_AGTGGGAGTCGAGATG	2439	FCA_GND8047885	F81	female	CD45-	0.0990018	4909	0.0737564	0.211909	1	8.8	N	1	Supporting	Supp_preGC_IIc
FCA_GND8047885_AGTGGGAGTGAGGGTT	1536	FCA_GND8047885	F81	female	CD45-	0.0730909	2750	0.0647482	0.0777385	1	8.8	N	1	Supporting	Supp_preGC_I
FCA_GND8047885_AGTGGGATCAGTTAGC	3137	FCA_GND8047885	F81	female	CD45-	0.00433784	7838	0.0404624	0.0415584	1	8.8	N	1	Supporting	Supp_preGC_IIb
FCA_GND8047885_AGTGGGATCATAGCAC	2062	FCA_GND8047885	F81	female	CD45-	0.0312974	5272	0.0718512	0.0718512	1	8.8	N	2	Mesenchymal_LHX9_ARX	Mesen_ovarianStroma
FCA_GND8047885_AGTGGGATCGGATGGA	1269	FCA_GND8047885	F81	female	CD45-	0.0221597	2843	0.0324867	0.0737564	1	8.8	N	0	Mesenchymal_GATA2_NR2F1	Mesen_dorsalMesentery
FCA_GND8047885_AGTGTCAAGAAACCGC	1608	FCA_GND8047885	F81	female	CD45-	0.0259109	3705	0.0264901	0.0272981	1	8.8	N	0	Mesenchymal_GATA2_NR2F1	Mesenchymal_GATA2_NR2F1
FCA_GND8047885_AGTGTCAAGATAGGAG	1585	FCA_GND8047885	F81	female	CD45-	0.0469516	2854	0.124555	0.15983	1	8.8	N	1	Supporting	Supp_preGC_I
FCA_GND8047885_AGTGTCAAGATCGGGT	1781	FCA_GND8047885	F81	female	CD45-	0.0644007	3354	0.0499648	0.104762	1	8.8	N	1	Supporting	Supp_preGC_I
FCA_GND8047885_AGTGTCAAGGACAGCT	3179	FCA_GND8047885	F81	female	CD45-	0.0480355	7432	0.0864662	0.238462	0.826584	8.8	N	1	Supporting	Supp_preGC_I
FCA_GND8047885_AGTGTCAAGTACGCGA	2795	FCA_GND8047885	F81	female	CD45-	0.0844929	5965	0.0241546	0.0664506	1	8.8	N	1	Supporting	Supp_sLGR5_female
FCA_GND8047885_AGTGTCAAGTCATGCT	1693	FCA_GND8047885	F81	female	CD45-	0.0272192	4078	0.0599078	0.0614786	1	8.8	N	9	PV	PV
FCA_GND8047885_AGTGTCAAGTCCAGGA	2038	FCA_GND8047885	F81	female	CD45-	0.0291352	5423	0.114094	0.0606932	1	8.8	N	2	Mesenchymal_LHX9_ARX	Mesen_ovarianStroma
FCA_GND8047885_AGTGTCAAGTTCGATC	2938	FCA_GND8047885	F81	female	CD45-	0.0305056	9572	0.128329	0.0718512	1	8.8	N	0	Mesenchymal_GATA2_NR2F1	Mesenchymal_GATA2_NR2F1
FCA_GND8047885_AGTGTCACAATCCAAC	2011	FCA_GND8047885	F81	female	CD45-	0.0398501	5069	0.196694	0.104762	1	8.8	N	1	Supporting	Supp_sKITLG
FCA_GND8047885_AGTGTCACATCGACGC	2551	FCA_GND8047885	F81	female	CD45-	0.0367669	6582	0.0718512	0.0606932	1	8.8	N	5	Coel Epi	Supp_ovarianSurf
FCA_GND8047885_AGTGTCACATTCCTCG	2157	FCA_GND8047885	F81	female	CD45-	0.0257063	4318	0.165217	0.101871	1	8.8	N	1	Supporting	Supp_preGC_I
FCA_GND8047885_AGTGTCAGTAAGGGAA	1890	FCA_GND8047885	F81	female	CD45-	0.0449145	4208	0.458194	0.147458	1	8.8	N	1	Supporting	Supp_sKITLG
FCA_GND8047885_AGTGTCAGTACCCAAT	3035	FCA_GND8047885	F81	female	CD45-	0.0443398	7217	0.128329	0.0808939	1	8.8	N	1	Supporting	Supp_preGC_IIb
FCA_GND8047885_AGTGTCAGTCTTCAAG	1701	FCA_GND8047885	F81	female	CD45-	0.0192413	3638	0.0113482	0.0272981	1	8.8	N	0	Mesenchymal_GATA2_NR2F1	Mesenchymal_GATA2_NR2F1
FCA_GND8047885_AGTGTCAGTGAGTATA	2185	FCA_GND8047885	F81	female	CD45-	0.0254805	4631	0.136364	0.147458	1	8.8	N	1	Supporting	Supp_preGC_IIc
FCA_GND8047885_AGTGTCAGTTACTGAC	2366	FCA_GND8047885	F81	female	CD45-	0.0617659	4938	0.034358	0.12093	1	8.8	N	1	Supporting	Supp_preGC_I
FCA_GND8047885_AGTGTCAGTTTCGCTC	2181	FCA_GND8047885	F81	female	CD45-	0.0372384	7358	0.0363077	0.0606932	1	8.8	N	2	Mesenchymal_LHX9_ARX	Mesen_ovarianStroma
FCA_GND8047885_AGTGTCATCACTTCAT	1833	FCA_GND8047885	F81	female	CD45-	0.0201789	5253	0.0415584	0.0787796	1	8.8	N	2	Mesenchymal_LHX9_ARX	Mesen_ovarianStroma
FCA_GND8047885_AGTGTCATCCAGAAGG	2202	FCA_GND8047885	F81	female	CD45-	0.0421903	4456	0.211909	0.109313	1	8.8	N	1	Supporting	Supp_preGC_I
FCA_GND8047885_AGTGTCATCCTGTAGA	3163	FCA_GND8047885	F81	female	CD45-	0.0206101	9704	0.0718512	0.110867	1	8.8	N	1	Supporting	Supp_preGC_IIb
FCA_GND8047885_AGTGTCATCGTGACAT	2292	FCA_GND8047885	F81	female	CD45-	0.056437	4979	0.117446	0.211909	1	8.8	N	1	Supporting	Supp_preGC_I
FCA_GND8047885_AGTGTCATCTCAAACG	1971	FCA_GND8047885	F81	female	CD45-	0.0196683	5186	0.0737564	0.0614786	1	8.8	N	1	Supporting	Supp_preGC_IIb
FCA_GND8047885_AGTGTCATCTCGCTTG	1487	FCA_GND8047885	F81	female	CD45-	0.0346099	3525	0.104762	0.128329	1	8.8	N	0	Mesenchymal_GATA2_NR2F1	Mesenchymal_GATA2_NR2F1
FCA_GND8047885_AGTGTCATCTGGCGTG	1699	FCA_GND8047885	F81	female	CD45-	0.01552	4317	0.075718	0.0554324	1	8.8	N	2	Mesenchymal_LHX9_ARX	Mesen_ovarianStroma
FCA_GND8047885_AGTTGGTAGACACTAA	3251	FCA_GND8047885	F81	female	CD45-	0.0344349	8654	0.0272981	0.0718512	1	8.8	N	0	Mesenchymal_GATA2_NR2F1	Mesenchymal_GATA2_NR2F1
FCA_GND8047885_AGTTGGTAGAGTGAGA	1800	FCA_GND8047885	F81	female	CD45-	0.0419939	5858	0.0212325	0.0606932	1	8.8	N	2	Mesenchymal_LHX9_ARX	Mesen_ovarianStroma
FCA_GND8047885_AGTTGGTAGCCAACAG	3552	FCA_GND8047885	F81	female	CD45-	0.0299825	12007	0.128329	0.0614786	1	8.8	N	2	Mesenchymal_LHX9_ARX	Mesen_ovarianStroma
FCA_GND8047885_AGTTGGTAGCTAAGAT	1632	FCA_GND8047885	F81	female	CD45-	0.0254341	4089	0.0583776	0.0334129	1	8.8	N	2	Mesenchymal_LHX9_ARX	Mesen_ovarianStroma
FCA_GND8047885_AGTTGGTAGCTGCAAG	2897	FCA_GND8047885	F81	female	CD45-	0.0562372	6846	0.0963855	0.12093	1	8.8	N	1	Supporting	Supp_preGC_I
FCA_GND8047885_AGTTGGTAGTTGCAGG	1569	FCA_GND8047885	F81	female	CD45-	0.0214581	3868	0.0682005	0.0554324	1	8.8	N	0	Mesenchymal_GATA2_NR2F1	Mesen_dorsalMesentery
FCA_GND8047885_AGTTGGTCAATTGCTG	2369	FCA_GND8047885	F81	female	CD45-	0.0460594	4885	0.107759	0.140645	1	8.8	N	1	Supporting	Supp_preGC_I
FCA_GND8047885_AGTTGGTCACACCGCA	2934	FCA_GND8047885	F81	female	CD45-	0.0721665	6679	0.0819672	0.11577	1	8.8	N	1	Supporting	Supp_preGC_I
FCA_GND8047885_AGTTGGTCATGGATGG	3147	FCA_GND8047885	F81	female	CD45-	0.0227592	10677	0.0888252	0.128329	1	8.8	N	0	Mesenchymal_GATA2_NR2F1	Mesenchymal_GATA2_NR2F1
FCA_GND8047885_AGTTGGTGTATAAACG	2556	FCA_GND8047885	F81	female	CD45-	0.0209332	6258	0.128329	0.106369	1	8.8	N	1	Supporting	Supp_preGC_IIb
FCA_GND8047885_AGTTGGTGTCCGAACC	1837	FCA_GND8047885	F81	female	CD45-	0.0157563	3808	0.075718	0.0718512	1	8.8	N	0	Mesenchymal_GATA2_NR2F1	Mesenchymal_GATA2_NR2F1
FCA_GND8047885_AGTTGGTGTGCACCAC	2429	FCA_GND8047885	F81	female	CD45-	0.065851	5558	0.0990807	0.104762	1	8.8	N	1	Supporting	Supp_preGC_I
FCA_GND8047885_AGTTGGTGTTACGGAG	2174	FCA_GND8047885	F81	female	CD45-	0.0732618	4286	0.104762	0.0798206	1	8.8	N	1	Supporting	Supp_preGC_I
FCA_GND8047885_AGTTGGTGTTTGTTTC	2336	FCA_GND8047885	F81	female	CD45-	0.0193593	5837	0.0512821	0.0606932	1	8.8	N	5	Coel Epi	Supp_ovarianSurf
FCA_GND8047885_AGTTGGTTCACGAAGG	1621	FCA_GND8047885	F81	female	CD45-	0.0211353	3312	0.0373134	0.0404624	1	8.8	N	0	Mesenchymal_GATA2_NR2F1	Mesen_dorsalMesentery
FCA_GND8047885_AGTTGGTTCCACGAAT	2121	FCA_GND8047885	F81	female	CD45-	0.0489939	4572	0.458194	0.109313	1	8.8	N	1	Supporting	Supp_preGC_I
FCA_GND8047885_AGTTGGTTCCTGTAGA	1697	FCA_GND8047885	F81	female	CD45-	0.028982	4106	0.0718512	0.0554324	1	8.8	N	0	Mesenchymal_GATA2_NR2F1	Mesen_dorsalMesentery
FCA_GND8047885_AGTTGGTTCGCCATAA	3382	FCA_GND8047885	F81	female	CD45-	0.0622246	9305	0.0486787	0.0900437	1	8.8	N	1	Supporting	Supp_preGC_IIa
FCA_GND8047885_ATAACGCAGGCTAGGT	1781	FCA_GND8047885	F81	female	CD45-	0.0395022	3696	0.0219436	0.0647482	1	8.8	N	5	Coel Epi	Supp_coelEpi
FCA_GND8047885_ATAACGCAGGTGCTTT	2416	FCA_GND8047885	F81	female	CD45-	0.0744298	4998	0.128329	0.11577	1	8.8	N	1	Supporting	Supp_preGC_I
FCA_GND8047885_ATAACGCAGTCAAGCG	1781	FCA_GND8047885	F81	female	CD45-	0.0257559	4465	0.0990807	0.0606932	1	8.8	N	2	Mesenchymal_LHX9_ARX	Mesen_ovarianStroma
FCA_GND8047885_ATAACGCAGTGGGCTA	927	FCA_GND8047885	F81	female	CD45-	0.0629921	1524	0.0888252	0.0599078	1	8.8	N	1	Supporting	Supp_preGC_I
FCA_GND8047885_ATAACGCCAGACACTT	1996	FCA_GND8047885	F81	female	CD45-	0.0154321	5184	0.0526316	0.0682005	1	8.8	N	1	Supporting	Supp_preGC_IIa
FCA_GND8047885_ATAACGCCAGCTCGCA	2707	FCA_GND8047885	F81	female	CD45-	0.0221416	8265	0.0819672	0.0272981	1	8.8	N	0	Mesenchymal_GATA2_NR2F1	Mesen_dorsalMesentery
FCA_GND8047885_ATAACGCCATCAGTAC	2004	FCA_GND8047885	F81	female	CD45-	0.028962	4316	0.104762	0.0798206	1	8.8	N	1	Supporting	Supp_preGC_I
FCA_GND8047885_ATAACGCGTAGCGATG	2839	FCA_GND8047885	F81	female	CD45-	0.0258143	9026	0.104762	0.128329	1	8.8	N	0	Mesenchymal_GATA2_NR2F1	Mesenchymal_GATA2_NR2F1
FCA_GND8047885_ATAACGCGTCCGAACC	1290	FCA_GND8047885	F81	female	CD45-	0.0423172	2434	0.0990807	0.109313	1	8.8	N	1	Supporting	Supp_sLGR5_female
FCA_GND8047885_ATAACGCGTCTGGAGA	1728	FCA_GND8047885	F81	female	CD45-	0.00649351	3542	0.220217	0.0474372	1	8.8	N	1	Supporting	Supp_preGC_IIb
FCA_GND8047885_ATAACGCGTTACAGAA	1952	FCA_GND8047885	F81	female	CD45-	0.0897912	4310	0.0599078	0.0599078	1	8.8	N	1	Supporting	Supp_preGC_I
FCA_GND8047885_ATAACGCGTTTGGGCC	1917	FCA_GND8047885	F81	female	CD45-	0.0654358	3683	0.107759	0.109313	1	8.8	N	1	Supporting	Supp_sLGR5_female
FCA_GND8047885_ATAACGCTCAACACGT	2359	FCA_GND8047885	F81	female	CD45-	0.0470468	4910	0.15983	0.104762	1	8.8	N	1	Supporting	Supp_preGC_I
FCA_GND8047885_ATAACGCTCCGAACGC	2194	FCA_GND8047885	F81	female	CD45-	0.0426033	5516	0.165217	0.0876457	1	8.8	N	2	Mesenchymal_LHX9_ARX	Mesen_ovarianStroma
FCA_GND8047885_ATAAGAGAGAGTAATC	2003	FCA_GND8047885	F81	female	CD45-	0.0231092	6664	0.0383407	0.0606932	1	8.8	N	2	Mesenchymal_LHX9_ARX	Mesen_ovarianStroma
FCA_GND8047885_ATAAGAGAGATCTGAA	1224	FCA_GND8047885	F81	female	CD45-	0.0376641	2894	0.034358	0.0526316	1	8.8	N	2	Mesenchymal_LHX9_ARX	Mesen_ovarianStroma
FCA_GND8047885_ATAAGAGAGGAGTCTG	1469	FCA_GND8047885	F81	female	CD45-	0.0472525	3767	0.0737564	0.0888252	1	8.8	N	5	Coel Epi	Supp_ovarianSurf
FCA_GND8047885_ATAAGAGAGGCCATAG	2023	FCA_GND8047885	F81	female	CD45-	0.0480971	4283	0.0324867	0.0664506	1	8.8	N	1	Supporting	Supp_sLGR5_female
FCA_GND8047885_ATAAGAGAGTGGTCCC	1452	FCA_GND8047885	F81	female	CD45-	0.0173649	4607	0.0664506	0.117446	1	8.8	N	2	Mesenchymal_LHX9_ARX	Mesen_testisStroma
FCA_GND8047885_ATAAGAGCAATGGAAT	1795	FCA_GND8047885	F81	female	CD45-	0.0125945	3970	0.0226674	0.0272981	1	8.8	N	0	Mesenchymal_GATA2_NR2F1	Mesen_dorsalMesentery
FCA_GND8047885_ATAAGAGCACAGACTT	2014	FCA_GND8047885	F81	female	CD45-	0.0466321	4439	0.189711	0.075718	1	8.8	N	1	Supporting	Supp_preGC_I
FCA_GND8047885_ATAAGAGCACGGACAA	2112	FCA_GND8047885	F81	female	CD45-	0.0397285	6041	0.0599078	0.0819672	1	8.8	N	9	PV	PV
FCA_GND8047885_ATAAGAGCAGCTCGCA	2443	FCA_GND8047885	F81	female	CD45-	0.0667549	5288	0.0499648	0.075718	1	8.8	N	1	Supporting	Supp_preGC_I
FCA_GND8047885_ATAAGAGCAGCTTAAC	2705	FCA_GND8047885	F81	female	CD45-	0.0739033	7158	0.124555	0.0900437	1	8.8	N	1	Supporting	Supp_preGC_IIb
FCA_GND8047885_ATAAGAGCAGTAGAGC	1558	FCA_GND8047885	F81	female	CD45-	0.0595238	2856	0.0272981	0.0526316	1	8.8	N	1	Supporting	Supp_preGC_I
FCA_GND8047885_ATAAGAGCATGGTAGG	2507	FCA_GND8047885	F81	female	CD45-	0.0478435	5727	0.107759	0.075718	1	8.8	N	1	Supporting	Supp_preGC_I
FCA_GND8047885_ATAAGAGCATGTAAGA	1944	FCA_GND8047885	F81	female	CD45-	0.0348837	4644	0.176829	0.114094	1	8.8	N	1	Supporting	Supp_preGC_IIa
FCA_GND8047885_ATAAGAGGTAGTGAAT	1985	FCA_GND8047885	F81	female	CD45-	0.0253074	5611	0.0438247	0.0876457	1	8.8	N	2	Mesenchymal_LHX9_ARX	Mesen_ovarianStroma
FCA_GND8047885_ATAAGAGGTCGAACAG	1797	FCA_GND8047885	F81	female	CD45-	0.0320724	4864	0.0554324	0.0798206	1	8.8	N	1	Supporting	Supp_preGC_IIa
FCA_GND8047885_ATAAGAGTCCTTCAAT	2138	FCA_GND8047885	F81	female	CD45-	0.0391566	4648	0.362398	0.15983	1	8.8	N	1	Supporting	Supp_preGC_I
FCA_GND8047885_ATAAGAGTCGAATGCT	2224	FCA_GND8047885	F81	female	CD45-	0.039503	5392	0.0990807	0.075718	1	8.8	N	1	Supporting	Supp_preGC_IIa
FCA_GND8047885_ATAAGAGTCGGCGCAT	1490	FCA_GND8047885	F81	female	CD45-	0.0291758	2742	0.12093	0.211909	1	8.8	N	1	Supporting	Supp_preGC_I
FCA_GND8047885_ATAGACCAGACGCACA	2152	FCA_GND8047885	F81	female	CD45-	0.0147059	6256	0.0599078	0.0737564	1	8.8	N	1	Supporting	Supp_preGC_IIa
FCA_GND8047885_ATAGACCAGTAGGCCA	1647	FCA_GND8047885	F81	female	CD45-	0.0459318	3810	0.110867	0.0547235	1	8.8	N	2	Mesenchymal_LHX9_ARX	Mesen_ovarianStroma
FCA_GND8047885_ATAGACCCACAACGCC	1894	FCA_GND8047885	F81	female	CD45-	0.0264423	5408	0.0664506	0.0606932	1	8.8	N	2	Mesenchymal_LHX9_ARX	Mesen_ovarianStroma
FCA_GND8047885_ATAGACCCAGATCCAT	1373	FCA_GND8047885	F81	female	CD45-	0.0239486	3424	0.0614786	0.0404624	1	8.8	N	0	Mesenchymal_GATA2_NR2F1	Mesen_ovarianStroma
FCA_GND8047885_ATAGACCGTGGTCCGT	2237	FCA_GND8047885	F81	female	CD45-	0.0664904	4918	0.101871	0.112481	1	8.8	N	1	Supporting	Supp_preGC_I
FCA_GND8047885_ATAGACCGTGGTCTCG	2220	FCA_GND8047885	F81	female	CD45-	0.0651749	4603	0.196694	0.0554324	1	8.8	N	1	Supporting	Supp_preGC_I
FCA_GND8047885_ATAGACCGTTTGCATG	1831	FCA_GND8047885	F81	female	CD45-	0.0684369	3653	0.140645	0.0798206	1	8.8	N	1	Supporting	Supp_preGC_I
FCA_GND8047885_ATAGACCTCTGGTATG	2291	FCA_GND8047885	F81	female	CD45-	0.0486775	4499	0.136364	0.0798206	1	8.8	N	1	Supporting	Supp_preGC_I
FCA_GND8047885_ATCACGAAGAGGACGG	1878	FCA_GND8047885	F81	female	CD45-	0.029654	4856	0.0426789	0.0888252	1	8.8	N	5	Coel Epi	Supp_ovarianSurf
FCA_GND8047885_ATCACGAAGCCAGGAT	2394	FCA_GND8047885	F81	female	CD45-	0.00446576	6046	0.0383407	0.0480507	1	8.8	N	1	Supporting	Supp_preGC_IIa
FCA_GND8047885_ATCACGAAGCTGAAAT	2371	FCA_GND8047885	F81	female	CD45-	0.0480749	4701	0.114094	0.104762	1	8.8	N	1	Supporting	Supp_preGC_I
FCA_GND8047885_ATCACGAAGGCGCTCT	1407	FCA_GND8047885	F81	female	CD45-	0.0335196	3043	0.149798	0.0614786	1	8.8	N	1	Supporting	Supp_preGC_IIa
FCA_GND8047885_ATCACGAAGTATCGAA	2746	FCA_GND8047885	F81	female	CD45-	0.0600378	5813	0.124555	0.11577	1	8.8	N	1	Supporting	Supp_sLGR5_female
FCA_GND8047885_ATCACGAAGTGCGTGA	1494	FCA_GND8047885	F81	female	CD45-	0.0231133	3591	0.0819672	0.075718	1	8.8	N	2	Mesenchymal_LHX9_ARX	Mesen_ovarianStroma
FCA_GND8047885_ATCACGACAACTGGCC	1933	FCA_GND8047885	F81	female	CD45-	0.024443	4623	0.0798206	0.0606932	1	8.8	N	2	Mesenchymal_LHX9_ARX	Mesen_ovarianStroma
FCA_GND8047885_ATCACGACACAACGTT	2215	FCA_GND8047885	F81	female	CD45-	0.0455607	5136	0.0937808	0.0647482	1	8.8	N	5	Coel Epi	Supp_coelEpi
FCA_GND8047885_ATCACGACATACGCTA	2174	FCA_GND8047885	F81	female	CD45-	0.0409821	5417	0.140645	0.0614786	1	8.8	N	2	Mesenchymal_LHX9_ARX	Mesen_ovarianStroma
FCA_GND8047885_ATCACGAGTAAAGTCA	2333	FCA_GND8047885	F81	female	CD45-	0.0243575	5953	0.12093	0.104762	1	8.8	N	1	Supporting	Supp_preGC_IIb
FCA_GND8047885_ATCACGAGTCGAACAG	2476	FCA_GND8047885	F81	female	CD45-	0.00930005	6129	0.0888252	0.110867	1	8.8	N	1	Supporting	Supp_preGC_IIb
FCA_GND8047885_ATCACGAGTGACTCAT	1862	FCA_GND8047885	F81	female	CD45-	0.0452643	3822	0.110867	0.0798206	1	8.8	N	1	Supporting	Supp_sLGR5_female
FCA_GND8047885_ATCACGATCATCTGTT	1754	FCA_GND8047885	F81	female	CD45-	0.0524632	3126	0.0664506	0.0798206	1	8.8	N	1	Supporting	Supp_preGC_I
FCA_GND8047885_ATCACGATCATGCAAC	2172	FCA_GND8047885	F81	female	CD45-	0.0699828	4644	0.0682005	0.0664506	1	8.8	N	1	Supporting	Supp_sLGR5_female
FCA_GND8047885_ATCACGATCATTGCCC	2362	FCA_GND8047885	F81	female	CD45-	0.0138408	6647	0.0540146	0.0614786	1	8.8	N	1	Supporting	Supp_preGC_IIa
FCA_GND8047885_ATCACGATCGCAGGCT	2341	FCA_GND8047885	F81	female	CD45-	0.0305164	6816	0.0583776	0.0664506	1	8.8	N	2	Mesenchymal_LHX9_ARX	Mesen_ovarianStroma
FCA_GND8047885_ATCACGATCGTGACAT	2528	FCA_GND8047885	F81	female	CD45-	0.0616541	5985	0.124555	0.211909	1	8.8	N	1	Supporting	Supp_preGC_I
FCA_GND8047885_ATCATCTAGATCCCAT	2374	FCA_GND8047885	F81	female	CD45-	0.0200438	5937	0.104762	0.107759	1	8.8	N	1	Supporting	Supp_preGC_IIa
FCA_GND8047885_ATCATCTCACAACTGT	2402	FCA_GND8047885	F81	female	CD45-	0.0463173	5743	0.132262	0.114094	1	8.8	N	1	Supporting	Supp_preGC_IIb
FCA_GND8047885_ATCATCTCATCCGGGT	2390	FCA_GND8047885	F81	female	CD45-	0.0234196	12212	0.238462	0.104974	1	8.8	N	10	Erythroid	Erythroid
FCA_GND8047885_ATCATCTGTAGGCATG	2498	FCA_GND8047885	F81	female	CD45-	0.00847836	6723	0.0404624	0.0480507	1	8.8	N	1	Supporting	Supp_preGC_IIb
FCA_GND8047885_ATCATCTGTATTAGCC	2511	FCA_GND8047885	F81	female	CD45-	0.0462555	4994	0.0990807	0.0664506	1	8.8	N	1	Supporting	Supp_preGC_I
FCA_GND8047885_ATCATCTGTCATGCAT	2216	FCA_GND8047885	F81	female	CD45-	0.0661595	4338	0.0630915	0.0798206	1	8.8	N	1	Supporting	Supp_preGC_I
FCA_GND8047885_ATCATCTGTGAACCTT	1688	FCA_GND8047885	F81	female	CD45-	0.0268549	3612	0.0819672	0.0554324	1	8.8	N	0	Mesenchymal_GATA2_NR2F1	Mesen_dorsalMesentery
FCA_GND8047885_ATCATCTGTTCCAACA	2519	FCA_GND8047885	F81	female	CD45-	0.0467736	5238	0.0353228	0.0841813	1	8.8	N	1	Supporting	Supp_preGC_I
FCA_GND8047885_ATCATCTGTTCCGGCA	2630	FCA_GND8047885	F81	female	CD45-	0.00275187	6541	0.0353228	0.0410827	1	8.8	N	1	Supporting	Supp_preGC_IIb
FCA_GND8047885_ATCATCTGTTGTTTGG	2306	FCA_GND8047885	F81	female	CD45-	0.0188098	5848	0.0682005	0.0614786	1	8.8	N	2	Mesenchymal_LHX9_ARX	Mesen_ovarianStroma
FCA_GND8047885_ATCATCTTCAAACCAC	1826	FCA_GND8047885	F81	female	CD45-	0.0584975	3248	0.183099	0.15983	1	8.8	N	1	Supporting	Supp_preGC_I
FCA_GND8047885_ATCATCTTCGGAAATA	2310	FCA_GND8047885	F81	female	CD45-	0.010184	5597	0.0630915	0.07	1	8.8	N	1	Supporting	Supp_preGC_IIb
FCA_GND8047885_ATCATCTTCGGCCGAT	1055	FCA_GND8047885	F81	female	CD45-	0.0720486	2304	0.0373134	0.0547235	1	8.8	N	2	Mesenchymal_LHX9_ARX	Mesen_ovarianStroma
FCA_GND8047885_ATCATCTTCGTAGGTT	1940	FCA_GND8047885	F81	female	CD45-	0.0390167	4434	0.0306891	0.0272981	1	8.8	N	0	Mesenchymal_GATA2_NR2F1	Mesen_dorsalMesentery
FCA_GND8047885_ATCATCTTCGTTGACA	2979	FCA_GND8047885	F81	female	CD45-	0.0653341	7454	0.34375	0.112602	1	8.8	N	6	Germ cells	Germcells_PGC
FCA_GND8047885_ATCATCTTCTATCCCG	2335	FCA_GND8047885	F81	female	CD45-	0.0099278	4432	0.0383407	0.112481	1	8.8	N	1	Supporting	Supp_preGC_I
FCA_GND8047885_ATCATGGAGACCGGAT	2525	FCA_GND8047885	F81	female	CD45-	0.0317437	6710	0.136364	0.128329	1	8.8	N	0	Mesenchymal_GATA2_NR2F1	Mesenchymal_GATA2_NR2F1
FCA_GND8047885_ATCATGGAGACCTAGG	2417	FCA_GND8047885	F81	female	CD45-	0.015149	6073	0.0353228	0.0480507	1	8.8	N	1	Supporting	Supp_preGC_IIa
FCA_GND8047885_ATCATGGAGAGTACAT	1877	FCA_GND8047885	F81	female	CD45-	0.0337455	3882	0.0718512	0.114094	1	8.8	N	1	Supporting	Supp_preGC_IIa
FCA_GND8047885_ATCATGGAGCTCCTTC	2337	FCA_GND8047885	F81	female	CD45-	0.0126035	5554	0.0798206	0.0937808	1	8.8	N	1	Supporting	Supp_preGC_IIb
FCA_GND8047885_ATCATGGAGTGACATA	2568	FCA_GND8047885	F81	female	CD45-	0.0517065	6827	0.132262	0.110867	1	8.8	N	1	Supporting	Supp_preGC_IIb
FCA_GND8047885_ATCATGGCAACTGGCC	2044	FCA_GND8047885	F81	female	CD45-	0.0134705	5345	0.0718512	0.0682005	1	8.8	N	1	Supporting	Supp_preGC_IIa
FCA_GND8047885_ATCATGGCAAGCCCAC	1896	FCA_GND8047885	F81	female	CD45-	0.0613718	3878	0.0718512	0.104762	1	8.8	N	1	Supporting	Supp_preGC_I
FCA_GND8047885_ATCATGGCAGACAAAT	1860	FCA_GND8047885	F81	female	CD45-	0.0215414	4178	0.0474227	0.0499648	1	8.8	N	0	Mesenchymal_GATA2_NR2F1	Mesen_dorsalMesentery
FCA_GND8047885_ATCATGGCAGCTGTTA	1624	FCA_GND8047885	F81	female	CD45-	0.0206954	3624	0.0198473	0.0272981	1	8.8	N	0	Mesenchymal_GATA2_NR2F1	Mesenchymal_GATA2_NR2F1
FCA_GND8047885_ATCATGGCATGAAGTA	2501	FCA_GND8047885	F81	female	CD45-	0.0162799	5344	0.165217	0.0718512	1	8.8	N	1	Supporting	Supp_preGC_IIb
FCA_GND8047885_ATCATGGCATTCACTT	2421	FCA_GND8047885	F81	female	CD45-	0.0570641	4714	0.0647482	0.104762	1	8.8	N	1	Supporting	Supp_preGC_IIb
FCA_GND8047885_ATCATGGCATTGGCGC	1681	FCA_GND8047885	F81	female	CD45-	0.0478445	4013	0.0937808	0.0606932	1	8.8	N	2	Mesenchymal_LHX9_ARX	Mesen_ovarianStroma
FCA_GND8047885_ATCATGGGTCATGCAT	1727	FCA_GND8047885	F81	female	CD45-	0.0212148	4478	0.0256971	0.0554324	1	8.8	N	0	Mesenchymal_GATA2_NR2F1	Mesen_dorsalMesentery
FCA_GND8047885_ATCATGGTCGTTTATC	2189	FCA_GND8047885	F81	female	CD45-	0.0413066	4745	0.15983	0.109313	1	8.8	N	1	Supporting	Supp_preGC_I
FCA_GND8047885_ATCATGGTCTCGATGA	2094	FCA_GND8047885	F81	female	CD45-	0.0701554	4376	0.0568862	0.0798206	1	8.8	N	1	Supporting	Supp_preGC_I
FCA_GND8047885_ATCATGGTCTGTTGAG	2398	FCA_GND8047885	F81	female	CD45-	0.0195251	6402	0.0864662	0.0614786	1	8.8	N	1	Supporting	Supp_preGC_IIa
FCA_GND8047885_ATCATGGTCTTTCCTC	3331	FCA_GND8047885	F81	female	CD45-	0.0242473	9898	0.458194	0.0950832	1	8.8	N	7	Endothelial	Endothelial
FCA_GND8047885_ATCCACCAGAGGTACC	2477	FCA_GND8047885	F81	female	CD45-	0.00957326	6163	0.15983	0.104762	1	8.8	N	1	Supporting	Supp_preGC_IIa
FCA_GND8047885_ATCCACCAGAGTAATC	3506	FCA_GND8047885	F81	female	CD45-	0.0371334	11526	0.0540146	0.0718512	1	8.8	N	0	Mesenchymal_GATA2_NR2F1	Mesenchymal_GATA2_NR2F1
FCA_GND8047885_ATCCACCAGTACGCGA	1921	FCA_GND8047885	F81	female	CD45-	0.0455298	3624	0.183099	0.15983	1	8.8	N	1	Supporting	Supp_preGC_I
FCA_GND8047885_ATCCACCCACAACGTT	2372	FCA_GND8047885	F81	female	CD45-	0.0386079	5517	0.189711	0.112481	1	8.8	N	1	Supporting	Supp_preGC_I
FCA_GND8047885_ATCCACCCACGGTAGA	2422	FCA_GND8047885	F81	female	CD45-	0.0103129	5624	0.132262	0.104762	1	8.8	N	1	Supporting	Supp_preGC_IIa
FCA_GND8047885_ATCCACCCAGGGTTAG	2890	FCA_GND8047885	F81	female	CD45-	0.0611621	6867	0.165217	0.12093	1	8.8	N	1	Supporting	Supp_preGC_I
FCA_GND8047885_ATCCACCGTCGGCACT	2227	FCA_GND8047885	F81	female	CD45-	0.0318605	4300	0.0272981	0.0554324	1	8.8	N	1	Supporting	Supp_preGC_I
FCA_GND8047885_ATCCACCTCACCACCT	1175	FCA_GND8047885	F81	female	CD45-	0.0522556	2660	0.0568862	0.075718	1	8.8	N	2	Mesenchymal_LHX9_ARX	Mesen_dorsalMesentery
FCA_GND8047885_ATCCACCTCATGTAGC	2462	FCA_GND8047885	F81	female	CD45-	0.027546	6353	0.0383407	0.0298165	1	8.8	N	5	Coel Epi	Supp_ovarianSurf
FCA_GND8047885_ATCCACCTCCCAAGAT	2095	FCA_GND8047885	F81	female	CD45-	0.0368235	5377	0.0888252	0.114094	1	8.8	N	1	Supporting	Supp_preGC_IIa
FCA_GND8047885_ATCCACCTCGACAGCC	2798	FCA_GND8047885	F81	female	CD45-	0.0621412	5922	0.0912621	0.0841813	1	8.8	N	1	Supporting	Supp_sLGR5_female
FCA_GND8047885_ATCCACCTCGCCAAAT	3445	FCA_GND8047885	F81	female	CD45-	0.0316391	10841	0.136364	0.0647482	1	8.8	N	0	Mesenchymal_GATA2_NR2F1	Mesenchymal_GATA2_NR2F1
FCA_GND8047885_ATCCACCTCTTGAGAC	1655	FCA_GND8047885	F81	female	CD45-	0.0185784	3714	0.0118939	0.0181832	1	8.8	N	0	Mesenchymal_GATA2_NR2F1	Mesen_dorsalMesentery
FCA_GND8047885_ATCCGAAAGAAACCGC	2538	FCA_GND8047885	F81	female	CD45-	0.0528501	6263	0.220217	0.211909	1	8.8	N	1	Supporting	Supp_preGC_I
FCA_GND8047885_ATCCGAAAGAGCAATT	2675	FCA_GND8047885	F81	female	CD45-	0.0225599	6383	0.0819672	0.0963855	1	8.8	N	1	Supporting	Supp_preGC_IIa
FCA_GND8047885_ATCCGAAAGTTGCAGG	2447	FCA_GND8047885	F81	female	CD45-	0.0106209	6120	0.0912621	0.110867	1	8.8	N	1	Supporting	Supp_preGC_IIb
FCA_GND8047885_ATCCGAACACCACCAG	1612	FCA_GND8047885	F81	female	CD45-	0.0562903	2949	0.0499648	0.0526316	1	8.8	N	1	Supporting	Supp_preGC_I
FCA_GND8047885_ATCCGAACACCAGGCT	2142	FCA_GND8047885	F81	female	CD45-	0.0290902	4847	0.259259	0.0798206	1	8.8	N	5	Coel Epi	Supp_preGC_IIa
FCA_GND8047885_ATCCGAACACCGCTAG	2027	FCA_GND8047885	F81	female	CD45-	0.0359892	5196	0.0798206	0.0606932	1	8.8	N	2	Mesenchymal_LHX9_ARX	Mesen_ovarianStroma
FCA_GND8047885_ATCCGAACACTGCCAG	1767	FCA_GND8047885	F81	female	CD45-	0.0190831	4297	0.0819672	0.0526316	1	8.8	N	2	Mesenchymal_LHX9_ARX	Mesen_ovarianStroma
FCA_GND8047885_ATCCGAACAGTTAACC	1374	FCA_GND8047885	F81	female	CD45-	0.0298823	3313	0.0426789	0.0181832	1	8.8	N	0	Mesenchymal_GATA2_NR2F1	Mesen_dorsalMesentery
FCA_GND8047885_ATCCGAACATTACCTT	2363	FCA_GND8047885	F81	female	CD45-	0.0373612	4684	0.114094	0.112481	1	8.8	N	1	Supporting	Supp_preGC_I
FCA_GND8047885_ATCCGAAGTACCATCA	3074	FCA_GND8047885	F81	female	CD45-	0.0513799	7863	0.0554324	0.0900437	1	8.8	N	1	Supporting	Supp_preGC_IIa
FCA_GND8047885_ATCCGAAGTACGCACC	1624	FCA_GND8047885	F81	female	CD45-	0.0304644	3381	0.0234043	0.0181832	1	8.8	N	0	Mesenchymal_GATA2_NR2F1	Mesen_dorsalMesentery
FCA_GND8047885_ATCCGAAGTGAGGGTT	2144	FCA_GND8047885	F81	female	CD45-	0.0352607	5275	0.0583776	0.0718512	1	8.8	N	0	Mesenchymal_GATA2_NR2F1	Mesenchymal_GATA2_NR2F1
FCA_GND8047885_ATCCGAATCCCAACGG	2810	FCA_GND8047885	F81	female	CD45-	0.0402836	6206	0.0912621	0.211909	1	8.8	N	1	Supporting	Supp_preGC_I
FCA_GND8047885_ATCCGAATCCCAGGTG	2280	FCA_GND8047885	F81	female	CD45-	0.0165344	6048	0.0798206	0.0614786	1	8.8	N	1	Supporting	Supp_preGC_IIa
FCA_GND8047885_ATCCGAATCCTAAGTG	1792	FCA_GND8047885	F81	female	CD45-	0.144471	3364	0.0438247	0.12093	1	8.8	N	1	Supporting	Supp_preGC_IIc
FCA_GND8047885_ATCGAGTAGAGGTAGA	1715	FCA_GND8047885	F81	female	CD45-	0.0558476	3044	0.124555	0.15983	1	8.8	N	1	Supporting	Supp_sLGR5_female
FCA_GND8047885_ATCGAGTAGCCTATGT	2282	FCA_GND8047885	F81	female	CD45-	0.0559204	4721	0.238462	0.0937808	1	8.8	N	1	Supporting	Supp_sLGR5_female
FCA_GND8047885_ATCGAGTAGCGTCTAT	2025	FCA_GND8047885	F81	female	CD45-	0.0681646	3961	0.140645	0.15983	1	8.8	N	1	Supporting	Supp_preGC_I
FCA_GND8047885_ATCGAGTAGGCACATG	1958	FCA_GND8047885	F81	female	CD45-	0.00402802	5710	0.0281215	0.0614786	1	8.8	N	2	Mesenchymal_LHX9_ARX	Mesen_ovarianStroma
FCA_GND8047885_ATCGAGTCAGGAACGT	1662	FCA_GND8047885	F81	female	CD45-	0.0693013	3492	0.0599078	0.0798206	1	8.8	N	1	Supporting	Supp_preGC_I
FCA_GND8047885_ATCGAGTTCAAACCGT	1999	FCA_GND8047885	F81	female	CD45-	0.00462657	4539	0.0191726	0.0415584	1	8.8	N	1	Supporting	Supp_preGC_IIb
FCA_GND8047885_ATCGAGTTCACAAACC	2353	FCA_GND8047885	F81	female	CD45-	0.0142222	5625	0.0841813	0.104762	1	8.8	N	1	Supporting	Supp_preGC_IIa
FCA_GND8047885_ATCGAGTTCATTTGGG	2225	FCA_GND8047885	F81	female	CD45-	0.00963815	5914	0.128329	0.0963855	1	8.8	N	13	Neural	Neural
FCA_GND8047885_ATCGAGTTCCGAATGT	2275	FCA_GND8047885	F81	female	CD45-	0.0990641	4381	0.0363077	0.0900437	1	8.8	N	1	Supporting	Supp_preGC_I
FCA_GND8047885_ATCGAGTTCCGCAGTG	2616	FCA_GND8047885	F81	female	CD45-	0.0302642	6245	0.154696	0.110867	1	8.8	N	1	Supporting	Supp_preGC_IIb
FCA_GND8047885_ATCTACTAGAAACCTA	2312	FCA_GND8047885	F81	female	CD45-	0.0209174	5450	0.0583776	0.107759	1	8.8	N	1	Supporting	Supp_preGC_IIa
FCA_GND8047885_ATCTACTAGACTGTAA	2186	FCA_GND8047885	F81	female	CD45-	0.0200147	5446	0.132262	0.0737564	1	8.8	N	1	Supporting	Supp_preGC_IIa
FCA_GND8047885_ATCTACTAGGCCCGTT	1716	FCA_GND8047885	F81	female	CD45-	0.0180474	4599	0.0234043	0.0334129	1	8.8	N	0	Mesenchymal_GATA2_NR2F1	Mesen_dorsalMesentery
FCA_GND8047885_ATCTACTAGGTAAACT	2381	FCA_GND8047885	F81	female	CD45-	0.0774297	5011	0.0990807	0.112481	1	8.8	N	1	Supporting	Supp_preGC_I
FCA_GND8047885_ATCTACTCAATAAGCA	1695	FCA_GND8047885	F81	female	CD45-	0.00746269	3886	0.0937808	0.111055	1	8.8	N	1	Supporting	Supp_preGC_IIa
FCA_GND8047885_ATCTACTCACCGTTGG	1325	FCA_GND8047885	F81	female	CD45-	0.0734116	3746	0.0438247	0.0606932	1	8.8	N	2	Mesenchymal_LHX9_ARX	Mesen_testisStroma
FCA_GND8047885_ATCTACTCATCTATGG	2583	FCA_GND8047885	F81	female	CD45-	0.0237207	6703	0.183099	0.114094	1	8.8	N	1	Supporting	Supp_preGC_IIa
FCA_GND8047885_ATCTACTCATGCAACT	2395	FCA_GND8047885	F81	female	CD45-	0.0419262	5939	0.0963855	0.109313	1	8.8	N	2	Mesenchymal_LHX9_ARX	Mesen_ovarianStroma
FCA_GND8047885_ATCTACTGTACCGCTG	2456	FCA_GND8047885	F81	female	CD45-	0.0306536	5187	0.283186	0.12093	1	8.8	N	1	Supporting	Supp_preGC_I
FCA_GND8047885_ATCTACTGTTCGGGCT	1730	FCA_GND8047885	F81	female	CD45-	0.0590132	3101	0.0289608	0.0526316	1	8.8	N	1	Supporting	Supp_preGC_I
FCA_GND8047885_ATCTACTGTTGAACTC	2358	FCA_GND8047885	F81	female	CD45-	0.0749064	4539	0.154696	0.11577	1	8.8	N	1	Supporting	Supp_preGC_I
FCA_GND8047885_ATCTACTTCATCACCC	3138	FCA_GND8047885	F81	female	CD45-	0.0422971	8724	0.220217	0.211909	1	8.8	N	1	Supporting	Supp_preGC_I
FCA_GND8047885_ATCTACTTCATCTGCC	2199	FCA_GND8047885	F81	female	CD45-	0.0335479	5902	0.114094	0.07	1	8.8	N	0	Mesenchymal_GATA2_NR2F1	Mesen_ovarianStroma
FCA_GND8047885_ATCTACTTCTCTGAGA	2660	FCA_GND8047885	F81	female	CD45-	0.0279353	7052	0.238462	0.114094	1	8.8	N	1	Supporting	Supp_preGC_IIb
FCA_GND8047885_ATCTGCCCACCTATCC	2580	FCA_GND8047885	F81	female	CD45-	0.0349345	6183	0.107759	0.114094	1	8.8	N	1	Supporting	Supp_preGC_IIb
FCA_GND8047885_ATCTGCCCATACTCTT	1696	FCA_GND8047885	F81	female	CD45-	0.064526	3270	0.0404624	0.0526316	1	8.8	N	1	Supporting	Supp_preGC_I
FCA_GND8047885_ATCTGCCGTAGCGCTC	2839	FCA_GND8047885	F81	female	CD45-	0.0758962	6667	0.0499648	0.0900437	1	8.8	N	1	Supporting	Supp_preGC_I
FCA_GND8047885_ATCTGCCGTGAACCTT	3108	FCA_GND8047885	F81	female	CD45-	0.0587482	7030	0.128329	0.0841813	1	8.8	N	1	Supporting	Supp_preGC_I
FCA_GND8047885_ATCTGCCGTGACTACT	3279	FCA_GND8047885	F81	female	CD45-	0.0367816	9570	0.564516	0.211909	1	8.8	N	1	Supporting	Supp_preGC_IIb
FCA_GND8047885_ATCTGCCGTGCCTGGT	1591	FCA_GND8047885	F81	female	CD45-	0.0232353	3400	0.0353228	0.0334129	1	8.8	N	0	Mesenchymal_GATA2_NR2F1	Mesen_dorsalMesentery
FCA_GND8047885_ATCTGCCGTTCAGTAC	2382	FCA_GND8047885	F81	female	CD45-	0.0145093	6134	0.189711	0.104762	1	8.8	N	1	Supporting	Supp_preGC_IIa
FCA_GND8047885_ATCTGCCGTTCCGGCA	2336	FCA_GND8047885	F81	female	CD45-	0.0214113	6632	0.0474227	0.114094	1	8.8	N	5	Coel Epi	Supp_sKITLG
FCA_GND8047885_ATCTGCCTCAACGGCC	2118	FCA_GND8047885	F81	female	CD45-	0.0160836	4974	0.0334129	0.0298165	1	8.8	N	5	Coel Epi	Supp_ovarianSurf
FCA_GND8047885_ATCTGCCTCCCACTTG	2136	FCA_GND8047885	F81	female	CD45-	0.0106415	6672	0.0526316	0.0798206	1	8.8	N	1	Supporting	Supp_preGC_IIa
FCA_GND8047885_ATCTGCCTCCGTAGTA	2242	FCA_GND8047885	F81	female	CD45-	0.0534282	5484	0.183099	0.114094	1	8.8	N	1	Supporting	Supp_preGC_IIa
FCA_GND8047885_ATCTGCCTCCTTGGTC	1966	FCA_GND8047885	F81	female	CD45-	0.0793735	3767	0.0718512	0.104762	1	8.8	N	1	Supporting	Supp_preGC_I
FCA_GND8047885_ATCTGCCTCGTCACGG	3128	FCA_GND8047885	F81	female	CD45-	0.0248517	9778	0.101871	0.0808939	1	8.8	N	1	Supporting	Supp_preGC_IIb
FCA_GND8047885_ATCTGCCTCGTTTAGG	2718	FCA_GND8047885	F81	female	CD45-	0.0135491	7602	0.110867	0.0767283	1	8.8	N	2	Mesenchymal_LHX9_ARX	Mesen_ovarianStroma
FCA_GND8047885_ATCTGCCTCTATCGCC	3033	FCA_GND8047885	F81	female	CD45-	0.0413462	8320	0.0963855	0.0900437	1	8.8	N	1	Supporting	Supp_preGC_IIb
FCA_GND8047885_ATCTGCCTCTCAAACG	2803	FCA_GND8047885	F81	female	CD45-	0.00482475	7047	0.0777385	0.0808939	1	8.8	N	1	Supporting	Supp_preGC_IIb
FCA_GND8047885_ATCTGCCTCTGGCGAC	2907	FCA_GND8047885	F81	female	CD45-	0.0334915	7166	0.22905	0.147458	1	8.8	N	1	Supporting	Supp_preGC_I
FCA_GND8047885_ATGAGGGAGACCTTTG	2498	FCA_GND8047885	F81	female	CD45-	0.00444286	5627	0.0664506	0.0410827	1	8.8	N	1	Supporting	Supp_preGC_IIb
FCA_GND8047885_ATGAGGGAGATGTAAC	1958	FCA_GND8047885	F81	female	CD45-	0.0150233	4726	0.0363077	0.0474372	1	8.8	N	1	Supporting	Supp_preGC_IIb
FCA_GND8047885_ATGAGGGAGGATATAC	2617	FCA_GND8047885	F81	female	CD45-	0.0862132	5498	0.0486787	0.0664506	1	8.8	N	1	Supporting	Supp_sLGR5_female
FCA_GND8047885_ATGAGGGAGGTGGGTT	1800	FCA_GND8047885	F81	female	CD45-	0.0307451	4456	0.0486787	0.0591427	1	8.8	N	7	Endothelial	Endothelial
FCA_GND8047885_ATGAGGGAGTCCGGTC	1745	FCA_GND8047885	F81	female	CD45-	0.0364842	4221	0.0937808	0.0798206	1	8.8	N	1	Supporting	Supp_preGC_IIb
FCA_GND8047885_ATGAGGGCAAGACACG	2467	FCA_GND8047885	F81	female	CD45-	0.0109298	6679	0.170877	0.0415584	1	8.8	N	1	Supporting	Supp_preGC_IIb
FCA_GND8047885_ATGAGGGCAAGGTGTG	1960	FCA_GND8047885	F81	female	CD45-	0.0357651	4921	0.0682005	0.0554324	1	8.8	N	2	Mesenchymal_LHX9_ARX	Mesen_ovarianStroma
FCA_GND8047885_ATGAGGGCAATGTTGC	2287	FCA_GND8047885	F81	female	CD45-	0.018985	5320	0.136364	0.104762	1	8.8	N	1	Supporting	Supp_preGC_IIa
FCA_GND8047885_ATGAGGGCACACTGCG	1684	FCA_GND8047885	F81	female	CD45-	0.024643	4342	0.0281215	0.0181832	1	8.8	N	0	Mesenchymal_GATA2_NR2F1	Mesen_dorsalMesentery
FCA_GND8047885_ATGAGGGCAGTTTACG	2813	FCA_GND8047885	F81	female	CD45-	0.0251506	6640	0.183099	0.0900437	1	8.8	N	1	Supporting	Supp_preGC_I
FCA_GND8047885_ATGAGGGCATTACGAC	1900	FCA_GND8047885	F81	female	CD45-	0.0246459	5437	0.0888252	0.0912621	1	8.8	N	9	PV	PV
FCA_GND8047885_ATGAGGGCATTTCAGG	2182	FCA_GND8047885	F81	female	CD45-	0.047305	4397	0.0777385	0.0937808	1	8.8	N	1	Supporting	Supp_sLGR5_female
FCA_GND8047885_ATGAGGGGTCCAGTAT	1612	FCA_GND8047885	F81	female	CD45-	0.0254528	4086	0.0486787	0.0526316	1	8.8	N	2	Mesenchymal_LHX9_ARX	Mesen_ovarianStroma
FCA_GND8047885_ATGAGGGGTCCGTGAC	1628	FCA_GND8047885	F81	female	CD45-	0.0171531	3906	0.0583776	0.104762	1	8.8	N	1	Supporting	Supp_preGC_IIb
FCA_GND8047885_ATGAGGGGTTGACGTT	1905	FCA_GND8047885	F81	female	CD45-	0.0304569	4137	0.0554324	0.0888252	1	8.8	N	1	Supporting	Supp_preGC_I
FCA_GND8047885_ATGAGGGTCCATGAAC	2098	FCA_GND8047885	F81	female	CD45-	0.0582666	4119	0.238462	0.15983	1	8.8	N	1	Supporting	Supp_preGC_I
FCA_GND8047885_ATGCGATAGAATTCCC	2022	FCA_GND8047885	F81	female	CD45-	0.019102	5078	0.0599078	0.104762	1	8.8	N	1	Supporting	Supp_preGC_IIa
FCA_GND8047885_ATGCGATAGATCCCAT	2322	FCA_GND8047885	F81	female	CD45-	0.00648243	5862	0.0568862	0.0474372	1	8.8	N	1	Supporting	Supp_preGC_IIb
FCA_GND8047885_ATGCGATAGATGTGTA	2208	FCA_GND8047885	F81	female	CD45-	0.0755307	4475	0.0474227	0.0554324	1	8.8	N	1	Supporting	Supp_preGC_I
FCA_GND8047885_ATGCGATAGCTAAGAT	2373	FCA_GND8047885	F81	female	CD45-	0.0640971	4696	0.12093	0.0777385	1	8.8	N	1	Supporting	Supp_preGC_I
FCA_GND8047885_ATGCGATAGTGACATA	1894	FCA_GND8047885	F81	female	CD45-	0.0799012	3642	0.145119	0.0977331	1	8.8	N	1	Supporting	Supp_preGC_I
FCA_GND8047885_ATGCGATCACGACTCG	2490	FCA_GND8047885	F81	female	CD45-	0.0349811	6089	0.104762	0.075718	1	8.8	N	1	Supporting	Supp_preGC_I
FCA_GND8047885_ATGCGATCAGCTTCGG	2309	FCA_GND8047885	F81	female	CD45-	0.0105925	5570	0.0449966	0.0614786	1	8.8	N	1	Supporting	Supp_preGC_IIa
FCA_GND8047885_ATGCGATCAGTGGGAT	2476	FCA_GND8047885	F81	female	CD45-	0.0311125	6589	0.0937808	0.110867	1	8.8	N	1	Supporting	Supp_preGC_IIb
FCA_GND8047885_ATGCGATGTGTCGCTG	1665	FCA_GND8047885	F81	female	CD45-	0.0340285	5466	0.0841813	0.0912621	1	8.8	N	9	PV	PV
FCA_GND8047885_ATGCGATTCACCATAG	2170	FCA_GND8047885	F81	female	CD45-	0.0255023	5176	0.0737564	0.106369	1	8.8	N	1	Supporting	Supp_preGC_IIb
FCA_GND8047885_ATGCGATTCGCGATCG	1960	FCA_GND8047885	F81	female	CD45-	0.0642978	3546	0.0486787	0.0554324	1	8.8	N	1	Supporting	Supp_preGC_I
FCA_GND8047885_ATGCGATTCGCGTAGC	1444	FCA_GND8047885	F81	female	CD45-	0.0179385	3512	0.0165854	0.0181832	1	8.8	N	0	Mesenchymal_GATA2_NR2F1	Mesenchymal_GATA2_NR2F1
FCA_GND8047885_ATGGGAGAGAGACGAA	1719	FCA_GND8047885	F81	female	CD45-	0.0614742	3351	0.154696	0.104762	1	8.8	N	1	Supporting	Supp_preGC_I
FCA_GND8047885_ATGGGAGAGCCGCCTA	1347	FCA_GND8047885	F81	female	CD45-	0.0720684	2456	0.15983	0.140645	1	8.8	N	1	Supporting	Supp_preGC_I
FCA_GND8047885_ATGGGAGAGGACAGAA	2175	FCA_GND8047885	F81	female	CD45-	0.0669129	4603	0.0718512	0.0841813	1	8.8	N	1	Supporting	Supp_preGC_I
FCA_GND8047885_ATGGGAGAGGTAAACT	2608	FCA_GND8047885	F81	female	CD45-	0.0153045	6142	0.211909	0.128329	1	8.8	N	1	Supporting	Supp_preGC_I
FCA_GND8047885_ATGGGAGAGTGTTAGA	1860	FCA_GND8047885	F81	female	CD45-	0.0479148	4508	0.0888252	0.107759	1	8.8	N	1	Supporting	Supp_preGC_IIa
FCA_GND8047885_ATGGGAGCACAGGTTT	2020	FCA_GND8047885	F81	female	CD45-	0.0285192	5470	0.0353228	0.07	1	8.8	N	2	Mesenchymal_LHX9_ARX	Mesen_ovarianStroma
FCA_GND8047885_ATGGGAGCAGTCCTTC	2380	FCA_GND8047885	F81	female	CD45-	0.00251046	5975	0.0383407	0.0614786	1	8.8	N	1	Supporting	Supp_preGC_IIa
FCA_GND8047885_ATGGGAGGTCCCTACT	2869	FCA_GND8047885	F81	female	CD45-	0.0496335	6548	0.0777385	0.211909	1	8.8	N	1	Supporting	Supp_preGC_I
FCA_GND8047885_ATGGGAGGTCTACCTC	1645	FCA_GND8047885	F81	female	CD45-	0.0380805	3230	0.0990807	0.123615	1	8.8	N	7	Endothelial	Endothelial
FCA_GND8047885_ATGGGAGGTGAACCTT	1814	FCA_GND8047885	F81	female	CD45-	0.02993	4143	0.0281215	0.0272981	1	8.8	N	0	Mesenchymal_GATA2_NR2F1	Mesen_dorsalMesentery
FCA_GND8047885_ATGGGAGGTTCCACTC	2057	FCA_GND8047885	F81	female	CD45-	0.0239072	5605	0.0393901	0.0334129	1	8.8	N	0	Mesenchymal_GATA2_NR2F1	Mesen_dorsalMesentery
FCA_GND8047885_ATGGGAGTCAGAGCTT	2622	FCA_GND8047885	F81	female	CD45-	0.0658266	5317	0.0583776	0.11577	1	8.8	N	1	Supporting	Supp_preGC_I
FCA_GND8047885_ATGGGAGTCCCAAGAT	1251	FCA_GND8047885	F81	female	CD45-	0.0310637	3187	0.0664506	0.0912621	1	8.8	N	9	PV	PV
FCA_GND8047885_ATGGGAGTCCTGCTTG	3598	FCA_GND8047885	F81	female	CD45-	0.0274758	10118	0.326683	0.15983	1	8.8	N	1	Supporting	Supp_preGC_I
FCA_GND8047885_ATGGGAGTCGACGGAA	1564	FCA_GND8047885	F81	female	CD45-	0.0321113	3737	0.0526316	0.0647482	1	8.8	N	5	Coel Epi	Supp_coelEpi
FCA_GND8047885_ATGGGAGTCGATCCCT	1885	FCA_GND8047885	F81	female	CD45-	0.0352314	5251	0.0963855	0.07	1	8.8	N	2	Mesenchymal_LHX9_ARX	Mesen_ovarianStroma
FCA_GND8047885_ATGGGAGTCGTAGATC	1808	FCA_GND8047885	F81	female	CD45-	0.0233296	5358	0.0449966	0.0614786	1	8.8	N	2	Mesenchymal_LHX9_ARX	Mesen_ovarianStroma
FCA_GND8047885_ATGTGTGAGACTCGGA	1939	FCA_GND8047885	F81	female	CD45-	0.0611797	3645	0.0841813	0.109313	1	8.8	N	1	Supporting	Supp_sLGR5_female
FCA_GND8047885_ATGTGTGAGAGCCTAG	2721	FCA_GND8047885	F81	female	CD45-	0.0387394	6505	0.145119	0.211909	1	8.8	N	1	Supporting	Supp_preGC_I
FCA_GND8047885_ATGTGTGAGATCGATA	1505	FCA_GND8047885	F81	female	CD45-	0.0435024	3609	0.0864662	0.0547235	1	8.8	N	2	Mesenchymal_LHX9_ARX	Mesen_ovarianStroma
FCA_GND8047885_ATGTGTGAGTCTCGGC	2329	FCA_GND8047885	F81	female	CD45-	0.0198701	5234	0.0165854	0.0410827	1	8.8	N	1	Supporting	Supp_preGC_IIb
FCA_GND8047885_ATGTGTGAGTGTTTGC	2008	FCA_GND8047885	F81	female	CD45-	0.0438326	4540	0.220217	0.140645	1	8.8	N	1	Supporting	Supp_preGC_I
FCA_GND8047885_ATGTGTGCATAAGACA	2718	FCA_GND8047885	F81	female	CD45-	0.0319229	9241	0.0438247	0.0526316	1	8.8	N	2	Mesenchymal_LHX9_ARX	Mesen_ovarianStroma
FCA_GND8047885_ATGTGTGCATGTCGAT	1312	FCA_GND8047885	F81	female	CD45-	0.0262148	3128	0.0438247	0.0554324	1	8.8	N	2	Mesenchymal_LHX9_ARX	Mesen_dorsalMesentery
FCA_GND8047885_ATGTGTGGTAGGACAC	2177	FCA_GND8047885	F81	female	CD45-	0.0301992	4669	0.117446	0.109313	1	8.8	N	1	Supporting	Supp_preGC_IIa
FCA_GND8047885_ATGTGTGGTCGAACAG	2958	FCA_GND8047885	F81	female	CD45-	0.0241474	8738	0.0393901	0.0272981	1	8.8	N	0	Mesenchymal_GATA2_NR2F1	Mesenchymal_GATA2_NR2F1
FCA_GND8047885_ATGTGTGGTCGTTGTA	2473	FCA_GND8047885	F81	female	CD45-	0.0576291	5171	0.0474227	0.0526316	1	8.8	N	1	Supporting	Supp_preGC_I
FCA_GND8047885_ATGTGTGGTGTTTGGT	2634	FCA_GND8047885	F81	female	CD45-	0.0559567	6094	0.0682005	0.075718	1	8.8	N	1	Supporting	Supp_preGC_IIb
FCA_GND8047885_ATGTGTGTCAACCATG	2613	FCA_GND8047885	F81	female	CD45-	0.0132379	7403	0.0647482	0.0474372	1	8.8	N	1	Supporting	Supp_preGC_IIb
FCA_GND8047885_ATGTGTGTCAGCTCTC	1407	FCA_GND8047885	F81	female	CD45-	0.0269093	3902	0.0393901	0.0606932	1	8.8	N	2	Mesenchymal_LHX9_ARX	Mesen_testisStroma
FCA_GND8047885_ATGTGTGTCATTTGGG	2356	FCA_GND8047885	F81	female	CD45-	0.0711809	4903	0.0647482	0.0554324	1	8.8	N	1	Supporting	Supp_preGC_I
FCA_GND8047885_ATGTGTGTCCATGCTC	2207	FCA_GND8047885	F81	female	CD45-	0.0218847	6123	0.0737564	0.0787796	1	8.8	N	2	Mesenchymal_LHX9_ARX	Mesen_ovarianStroma
FCA_GND8047885_ATGTGTGTCTCGGACG	1619	FCA_GND8047885	F81	female	CD45-	0.0120987	4298	0.0647482	0.0682997	1	8.8	N	9	PV	PV
FCA_GND8047885_ATGTGTGTCTGCAAGT	1142	FCA_GND8047885	F81	female	CD45-	0.10722	1856	0.0264901	0.0937808	1	8.8	N	1	Supporting	Supp_sLGR5_female
FCA_GND8047885_ATTACTCAGACGACGT	2442	FCA_GND8047885	F81	female	CD45-	0.0397367	8355	0.0449966	0.0718512	1	8.8	N	2	Mesenchymal_LHX9_ARX	Mesen_ovarianStroma
FCA_GND8047885_ATTACTCAGAGTGAGA	1952	FCA_GND8047885	F81	female	CD45-	0.0337538	5866	0.0614786	0.0614786	1	8.8	N	9	PV	PV
FCA_GND8047885_ATTACTCAGCTAACAA	2498	FCA_GND8047885	F81	female	CD45-	0.0141498	8198	0.0353228	0.0614786	1	8.8	N	2	Mesenchymal_LHX9_ARX	Mesen_ovarianStroma
FCA_GND8047885_ATTACTCAGCTGCCCA	1486	FCA_GND8047885	F81	female	CD45-	0.031457	3624	0.07	0.0798206	1	8.8	N	1	Supporting	Supp_preGC_IIa
FCA_GND8047885_ATTACTCAGGGTTCCC	1610	FCA_GND8047885	F81	female	CD45-	0.0607131	3113	0.382857	0.140645	1	8.8	N	1	Supporting	Supp_preGC_I
FCA_GND8047885_ATTACTCAGTGAACAT	2135	FCA_GND8047885	F81	female	CD45-	0.0665508	4027	0.140645	0.0664506	1	8.8	N	1	Supporting	Supp_sLGR5_female
FCA_GND8047885_ATTACTCCACCTATCC	2301	FCA_GND8047885	F81	female	CD45-	0.0789532	4509	0.0682005	0.104762	1	8.8	N	1	Supporting	Supp_preGC_I
FCA_GND8047885_ATTACTCCAGCCAATT	2449	FCA_GND8047885	F81	female	CD45-	0.0352432	4852	0.140645	0.12093	1	8.8	N	1	Supporting	Supp_preGC_I
FCA_GND8047885_ATTACTCCAGGCAGTA	1764	FCA_GND8047885	F81	female	CD45-	0.018423	4071	0.0990807	0.075718	1	8.8	N	2	Mesenchymal_LHX9_ARX	Mesen_ovarianStroma
FCA_GND8047885_ATTACTCCATTCGACA	2553	FCA_GND8047885	F81	female	CD45-	0.0304942	5706	0.0888252	0.11577	1	8.8	N	1	Supporting	Supp_preGC_I
FCA_GND8047885_ATTACTCGTAAGAGGA	2873	FCA_GND8047885	F81	female	CD45-	0.0324948	6678	0.34375	0.147458	1	8.8	N	1	Supporting	Supp_preGC_I
FCA_GND8047885_ATTACTCGTACAGCAG	2746	FCA_GND8047885	F81	female	CD45-	0.0711343	6312	0.0426789	0.0841813	1	8.8	N	1	Supporting	Supp_sLGR5_female
FCA_GND8047885_ATTACTCGTACTTGAC	1267	FCA_GND8047885	F81	female	CD45-	0.119156	2417	0.0798206	0.147458	1	8.8	N	1	Supporting	Supp_sKITLG
FCA_GND8047885_ATTACTCTCAAACCGT	2711	FCA_GND8047885	F81	female	CD45-	0.0669067	6666	0.0568862	0.0900437	1	8.8	N	1	Supporting	Supp_preGC_I
FCA_GND8047885_ATTACTCTCACGATGT	2230	FCA_GND8047885	F81	female	CD45-	0.026087	5980	0.0864662	0.0737564	1	8.8	N	2	Mesenchymal_LHX9_ARX	Mesen_ovarianStroma
FCA_GND8047885_ATTACTCTCCGCTGTT	2332	FCA_GND8047885	F81	female	CD45-	0.0300538	6688	0.0383407	0.0682005	1	8.8	N	1	Supporting	Supp_preGC_IIa
FCA_GND8047885_ATTACTCTCCTTTCGG	2551	FCA_GND8047885	F81	female	CD45-	0.0642495	5323	0.0664506	0.0554324	1	8.8	N	1	Supporting	Supp_preGC_I
FCA_GND8047885_ATTACTCTCTCTTATG	2372	FCA_GND8047885	F81	female	CD45-	0.0521235	4662	0.114094	0.104762	1	8.8	N	1	Supporting	Supp_preGC_I
FCA_GND8047885_ATTACTCTCTTGAGGT	1517	FCA_GND8047885	F81	female	CD45-	0.0187623	3038	0.0153551	0.0181832	1	8.8	N	0	Mesenchymal_GATA2_NR2F1	Mesen_dorsalMesentery
FCA_GND8047885_ATTATCCAGAGTACAT	1579	FCA_GND8047885	F81	female	CD45-	0.0536088	3824	0.0334129	0.0334129	1	8.8	N	0	Mesenchymal_GATA2_NR2F1	Mesen_dorsalMesentery
FCA_GND8047885_ATTATCCAGATCACGG	2364	FCA_GND8047885	F81	female	CD45-	0.0588235	4692	0.0963855	0.109313	1	8.8	N	1	Supporting	Supp_preGC_I
FCA_GND8047885_ATTATCCAGCACCGTC	1660	FCA_GND8047885	F81	female	CD45-	0.0241183	3856	0.101871	0.0876457	1	8.8	N	2	Mesenchymal_LHX9_ARX	Mesen_ovarianStroma
FCA_GND8047885_ATTATCCAGCCACGTC	2304	FCA_GND8047885	F81	female	CD45-	0.0118354	5323	0.0819672	0.0718512	1	8.8	N	1	Supporting	Supp_preGC_IIb
FCA_GND8047885_ATTATCCAGCCCAGCT	2208	FCA_GND8047885	F81	female	CD45-	0.00885936	5418	0.0334129	0.106369	1	8.8	N	1	Supporting	Supp_preGC_IIb
FCA_GND8047885_ATTATCCCACGAAACG	1808	FCA_GND8047885	F81	female	CD45-	0.0245216	5383	0.0718512	0.07	1	8.8	N	2	Mesenchymal_LHX9_ARX	Mesen_ovarianStroma
FCA_GND8047885_ATTATCCCAGGCGATA	2458	FCA_GND8047885	F81	female	CD45-	0.0206186	6208	0.176829	0.109313	1	8.8	N	1	Supporting	Supp_preGC_IIa
FCA_GND8047885_ATTATCCCAGGTGCCT	1763	FCA_GND8047885	F81	female	CD45-	0.0320715	3804	0.0526316	0.0647482	1	8.8	N	0	Mesenchymal_GATA2_NR2F1	Mesenchymal_GATA2_NR2F1
FCA_GND8047885_ATTATCCCATCGATTG	1310	FCA_GND8047885	F81	female	CD45-	0.0210008	3857	0.0272981	0.0606932	1	8.8	N	2	Mesenchymal_LHX9_ARX	Mesen_testisStroma
FCA_GND8047885_ATTATCCCATTGCGGC	1017	FCA_GND8047885	F81	female	CD45-	0.0200391	2046	0.0841813	0.0737564	1	8.8	N	1	Supporting	Supp_preGC_IIa
FCA_GND8047885_ATTATCCGTAGAAGGA	2734	FCA_GND8047885	F81	female	CD45-	0.0366981	10382	0.0449966	0.0614786	1	8.8	N	2	Mesenchymal_LHX9_ARX	Mesen_ovarianStroma
FCA_GND8047885_ATTATCCGTCATCCCT	1731	FCA_GND8047885	F81	female	CD45-	0.0595771	4918	0.0404624	0.0606932	1	8.8	N	2	Mesenchymal_LHX9_ARX	Mesen_ovarianStroma
FCA_GND8047885_ATTATCCGTCGAACAG	2520	FCA_GND8047885	F81	female	CD45-	0.02775	6991	0.489362	0.075718	1	8.8	N	2	Mesenchymal_LHX9_ARX	Mesen_ovarianStroma
FCA_GND8047885_ATTATCCGTCTGCGGT	1783	FCA_GND8047885	F81	female	CD45-	0.0222085	4863	0.0682005	0.0737564	1	8.8	N	2	Mesenchymal_LHX9_ARX	Mesen_dorsalMesentery
FCA_GND8047885_ATTATCCGTGATAAAC	1812	FCA_GND8047885	F81	female	CD45-	0.0227018	3568	0.211909	0.220217	1	8.8	N	0	Mesenchymal_GATA2_NR2F1	Mesenchymal_GATA2_NR2F1
FCA_GND8047885_ATTATCCGTGATAAGT	2550	FCA_GND8047885	F81	female	CD45-	0.0564864	6267	0.0912621	0.114094	1	8.8	N	1	Supporting	Supp_preGC_IIa
FCA_GND8047885_ATTATCCGTGCTCTTC	1627	FCA_GND8047885	F81	female	CD45-	0.0843124	2894	0.0353228	0.0664506	1	8.8	N	1	Supporting	Supp_sLGR5_female
FCA_GND8047885_ATTATCCGTGTGAATA	2253	FCA_GND8047885	F81	female	CD45-	0.0545249	4420	0.0249187	0.0554324	1	8.8	N	1	Supporting	Supp_preGC_I
FCA_GND8047885_ATTATCCGTTCAGTAC	2494	FCA_GND8047885	F81	female	CD45-	0.0219906	6139	0.104762	0.114094	1	8.8	N	1	Supporting	Supp_preGC_IIa
FCA_GND8047885_ATTATCCGTTGCCTCT	2896	FCA_GND8047885	F81	female	CD45-	0.0587462	6843	0.110867	0.211909	1	8.8	N	1	Supporting	Supp_preGC_I
FCA_GND8047885_ATTATCCTCCGAATGT	3033	FCA_GND8047885	F81	female	CD45-	0.0854566	6986	0.0963855	0.126442	1	8.8	N	1	Supporting	Supp_preGC_I
FCA_GND8047885_ATTATCCTCGGAGGTA	2336	FCA_GND8047885	F81	female	CD45-	0.074676	5169	0.0614786	0.147671	1	8.8	N	1	Supporting	Supp_preGC_IIc
FCA_GND8047885_ATTATCCTCGGCGCAT	1802	FCA_GND8047885	F81	female	CD45-	0.0395377	4932	0.0449966	0.0606932	1	8.8	N	2	Mesenchymal_LHX9_ARX	Mesen_ovarianStroma
FCA_GND8047885_ATTCTACAGCCTCGTG	1921	FCA_GND8047885	F81	female	CD45-	0.0281147	5442	0.0526316	0.0606932	1	8.8	N	2	Mesenchymal_LHX9_ARX	Mesen_ovarianStroma
FCA_GND8047885_ATTCTACAGCTACCGC	2149	FCA_GND8047885	F81	female	CD45-	0.0334657	5289	0.0664506	0.147458	1	8.8	N	1	Supporting	Supp_sKITLG
FCA_GND8047885_ATTCTACAGGATGGTC	2272	FCA_GND8047885	F81	female	CD45-	0.0603757	4472	0.114094	0.12093	1	8.8	N	1	Supporting	Supp_preGC_I
FCA_GND8047885_ATTCTACAGGCTAGCA	2451	FCA_GND8047885	F81	female	CD45-	0.0530018	6113	0.0289608	0.0298165	1	8.8	N	5	Coel Epi	Supp_ovarianSurf
FCA_GND8047885_ATTCTACAGGTACTCT	2768	FCA_GND8047885	F81	female	CD45-	0.0233337	8957	0.07	0.0614786	1	8.8	N	2	Mesenchymal_LHX9_ARX	Mesen_ovarianStroma
FCA_GND8047885_ATTCTACCAAAGGAAG	1404	FCA_GND8047885	F81	female	CD45-	0.0260054	3307	0.0393901	0.0554324	1	8.8	N	0	Mesenchymal_GATA2_NR2F1	Mesen_dorsalMesentery
FCA_GND8047885_ATTCTACCAAGGGTCA	2599	FCA_GND8047885	F81	female	CD45-	0.00525421	6471	0.0798206	0.0718512	1	8.8	N	1	Supporting	Supp_preGC_IIb
FCA_GND8047885_ATTCTACCAATCGAAA	2143	FCA_GND8047885	F81	female	CD45-	0.0468472	4504	0.0737564	0.0599078	1	8.8	N	1	Supporting	Supp_preGC_I
FCA_GND8047885_ATTCTACCACCATCCT	2838	FCA_GND8047885	F81	female	CD45-	0.02171	8199	0.0777385	0.0937808	1	8.8	N	1	Supporting	Supp_preGC_IIa
FCA_GND8047885_ATTCTACGTCTAAACC	2910	FCA_GND8047885	F81	female	CD45-	0.0218341	7328	0.104762	0.119188	1	8.8	N	1	Supporting	Supp_preGC_IIb
FCA_GND8047885_ATTCTACGTGCAGTAG	2535	FCA_GND8047885	F81	female	CD45-	0.0349396	6869	0.0426789	0.0682005	1	8.8	N	1	Supporting	Supp_preGC_IIa
FCA_GND8047885_ATTCTACGTTAAGTAG	2493	FCA_GND8047885	F81	female	CD45-	0.0241115	6387	0.114094	0.119188	1	8.8	N	1	Supporting	Supp_preGC_IIb
FCA_GND8047885_ATTCTACGTTTGGGCC	1745	FCA_GND8047885	F81	female	CD45-	0.0927016	3398	0.0864662	0.112481	1	8.8	N	1	Supporting	Supp_preGC_I
FCA_GND8047885_ATTCTACTCAAACCAC	1874	FCA_GND8047885	F81	female	CD45-	0.0308717	4956	0.0718512	0.0737564	1	8.8	N	0	Mesenchymal_GATA2_NR2F1	Mesen_dorsalMesentery
FCA_GND8047885_ATTCTACTCCCAGGTG	2728	FCA_GND8047885	F81	female	CD45-	0.0127473	6825	0.117446	0.117446	1	8.8	N	1	Supporting	Supp_preGC_IIa
FCA_GND8047885_ATTCTACTCTAACCGA	2320	FCA_GND8047885	F81	female	CD45-	0.0439539	5119	0.12093	0.07	1	8.8	N	1	Supporting	Supp_preGC_IIb
FCA_GND8047885_ATTCTACTCTTGCATT	2719	FCA_GND8047885	F81	female	CD45-	0.00959298	7297	0.107759	0.128329	1	8.8	N	1	Supporting	Supp_preGC_IIb
FCA_GND8047885_ATTGGACAGATCCCGC	1716	FCA_GND8047885	F81	female	CD45-	0.0165372	3991	0.0306891	0.0272981	1	8.8	N	0	Mesenchymal_GATA2_NR2F1	Mesenchymal_GATA2_NR2F1
FCA_GND8047885_ATTGGACAGCGTGTCC	1679	FCA_GND8047885	F81	female	CD45-	0.00441826	4074	0.0198473	0.0614786	1	8.8	N	1	Supporting	Supp_preGC_IIa
FCA_GND8047885_ATTGGACAGCTAGTGG	1958	FCA_GND8047885	F81	female	CD45-	0.0354304	4403	0.0664506	0.0963855	1	8.8	N	7	Endothelial	Endothelial
FCA_GND8047885_ATTGGACAGCTTATCG	2668	FCA_GND8047885	F81	female	CD45-	0.0213146	7272	0.0777385	0.0614786	1	8.8	N	1	Supporting	Supp_preGC_IIb
FCA_GND8047885_ATTGGACAGTGGTCCC	1684	FCA_GND8047885	F81	female	CD45-	0.0465343	3073	0.114094	0.104762	1	8.8	N	1	Supporting	Supp_preGC_I
FCA_GND8047885_ATTGGACCAACACGCC	2626	FCA_GND8047885	F81	female	CD45-	0.0308847	6929	0.0737564	0.075718	1	8.8	N	1	Supporting	Supp_preGC_IIa
FCA_GND8047885_ATTGGACCAAGTTGTC	2397	FCA_GND8047885	F81	female	CD45-	0.0530062	5339	0.0937808	0.0554324	1	8.8	N	1	Supporting	Supp_preGC_I
FCA_GND8047885_ATTGGACCAATCTACG	1827	FCA_GND8047885	F81	female	CD45-	0.0523238	3249	0.104762	0.104762	1	8.8	N	1	Supporting	Supp_preGC_I
FCA_GND8047885_ATTGGACCACTACAGT	2294	FCA_GND8047885	F81	female	CD45-	0.0291619	7064	0.0599078	0.0614786	1	8.8	N	2	Mesenchymal_LHX9_ARX	Mesen_ovarianStroma
FCA_GND8047885_ATTGGACGTAAACCTC	2211	FCA_GND8047885	F81	female	CD45-	0.0531011	4708	0.0664506	0.0664506	1	8.8	N	1	Supporting	Supp_sLGR5_female
FCA_GND8047885_ATTGGACGTAACGACG	2607	FCA_GND8047885	F81	female	CD45-	0.0371665	6296	0.107759	0.0808939	1	8.8	N	1	Supporting	Supp_preGC_IIb
FCA_GND8047885_ATTGGACGTCGGATCC	1532	FCA_GND8047885	F81	female	CD45-	0.0410127	3950	0.0599078	0.114094	1	8.8	N	1	Supporting	Supp_preGC_IIa
FCA_GND8047885_ATTGGACGTGCTTCTC	2086	FCA_GND8047885	F81	female	CD45-	0.0694445	3888	0.075718	0.109313	1	8.8	N	1	Supporting	Supp_preGC_I
FCA_GND8047885_ATTGGACTCAGCACAT	1963	FCA_GND8047885	F81	female	CD45-	0.0570112	4122	0.140645	0.101871	1	8.8	N	1	Supporting	Supp_preGC_I
FCA_GND8047885_ATTGGTGAGCCACCTG	2168	FCA_GND8047885	F81	female	CD45-	0.0656371	4403	0.0777385	0.0664506	1	8.8	N	1	Supporting	Supp_sLGR5_female
FCA_GND8047885_ATTGGTGAGCCTATGT	2218	FCA_GND8047885	F81	female	CD45-	0.0262075	6563	0.0737564	0.0606932	1	8.8	N	2	Mesenchymal_LHX9_ARX	Mesen_ovarianStroma
FCA_GND8047885_ATTGGTGAGCTAAGAT	2799	FCA_GND8047885	F81	female	CD45-	0.0267128	6364	0.0614786	0.104762	1	8.8	N	1	Supporting	Supp_preGC_IIb
FCA_GND8047885_ATTGGTGAGGACGAAA	2806	FCA_GND8047885	F81	female	CD45-	0.0157589	6536	0.170877	0.0808939	1	8.8	N	1	Supporting	Supp_preGC_IIb
FCA_GND8047885_ATTGGTGCAATAGCAA	2435	FCA_GND8047885	F81	female	CD45-	0.0269993	5852	0.0777385	0.147458	1	8.8	N	1	Supporting	Supp_preGC_IIa
FCA_GND8047885_ATTGGTGCACCAGATT	2146	FCA_GND8047885	F81	female	CD45-	0.0691124	4225	0.0888252	0.0937808	1	8.8	N	1	Supporting	Supp_preGC_I
FCA_GND8047885_ATTGGTGCACGCCAGT	2609	FCA_GND8047885	F81	female	CD45-	0.0285513	7110	0.0990807	0.107759	1	8.8	N	1	Supporting	Supp_preGC_IIa
FCA_GND8047885_ATTGGTGCACTTAAGC	2252	FCA_GND8047885	F81	female	CD45-	0.0373472	5971	0.0819672	0.0614786	1	8.8	N	2	Mesenchymal_LHX9_ARX	Mesen_ovarianStroma
FCA_GND8047885_ATTGGTGGTTGGTTTG	1722	FCA_GND8047885	F81	female	CD45-	0.0196454	4174	0.0363077	0.0181832	1	8.8	N	0	Mesenchymal_GATA2_NR2F1	Mesen_dorsalMesentery
FCA_GND8047885_ATTGGTGTCCTTGACC	2391	FCA_GND8047885	F81	female	CD45-	0.0605505	4905	0.211909	0.12093	1	8.8	N	1	Supporting	Supp_preGC_I
FCA_GND8047885_ATTGGTGTCTGATTCT	2836	FCA_GND8047885	F81	female	CD45-	0.00673993	6825	0.149798	0.107759	1	8.8	N	1	Supporting	Supp_preGC_IIa
FCA_GND8047885_ATTTCTGAGACTAAGT	2244	FCA_GND8047885	F81	female	CD45-	0.0324257	5582	0.0373134	0.0647482	1	8.8	N	5	Coel Epi	Supp_coelEpi
FCA_GND8047885_ATTTCTGAGAGCTGCA	2103	FCA_GND8047885	F81	female	CD45-	0.014901	4899	0.176829	0.0682005	1	8.8	N	1	Supporting	Supp_preGC_IIa
FCA_GND8047885_ATTTCTGAGATAGTCA	1809	FCA_GND8047885	F81	female	CD45-	0.0113531	4316	0.034358	0.0334129	1	8.8	N	0	Mesenchymal_GATA2_NR2F1	Mesenchymal_GATA2_NR2F1
FCA_GND8047885_ATTTCTGAGCGTGAAC	1982	FCA_GND8047885	F81	female	CD45-	0.0440506	3950	0.0963855	0.101871	1	8.8	N	1	Supporting	Supp_preGC_I
FCA_GND8047885_ATTTCTGAGGAGTTGC	2820	FCA_GND8047885	F81	female	CD45-	0.0610782	6418	0.0937808	0.101871	1	8.8	N	1	Supporting	Supp_preGC_I
FCA_GND8047885_ATTTCTGAGGGCATGT	2048	FCA_GND8047885	F81	female	CD45-	0.02891	5569	0.0888252	0.075718	1	8.8	N	2	Mesenchymal_LHX9_ARX	Mesen_testisStroma
FCA_GND8047885_ATTTCTGAGGTGTGGT	1444	FCA_GND8047885	F81	female	CD45-	0.0534323	2695	0.259259	0.12093	1	8.8	N	1	Supporting	Supp_preGC_I
FCA_GND8047885_ATTTCTGAGTAGGCCA	2270	FCA_GND8047885	F81	female	CD45-	0.038569	7156	0.0353228	0.0606932	1	8.8	N	5	Coel Epi	Supp_ovarianSurf
FCA_GND8047885_ATTTCTGCAATACGCT	2221	FCA_GND8047885	F81	female	CD45-	0.0272155	5879	0.0819672	0.0647482	1	8.8	N	5	Coel Epi	Supp_coelEpi
FCA_GND8047885_ATTTCTGCACGGCTAC	1999	FCA_GND8047885	F81	female	CD45-	0.0322134	5060	0.0647482	0.114094	1	8.8	N	1	Supporting	Supp_preGC_IIa
FCA_GND8047885_ATTTCTGCAGGTCTCG	3414	FCA_GND8047885	F81	female	CD45-	0.0314047	11718	0.132262	0.0647482	1	8.8	N	0	Mesenchymal_GATA2_NR2F1	Mesenchymal_GATA2_NR2F1
FCA_GND8047885_ATTTCTGCAGTTCATG	1621	FCA_GND8047885	F81	female	CD45-	0.0193071	3781	0.0205339	0.0272981	1	8.8	N	0	Mesenchymal_GATA2_NR2F1	Mesenchymal_GATA2_NR2F1
FCA_GND8047885_ATTTCTGCATACTACG	2544	FCA_GND8047885	F81	female	CD45-	0.0608696	5175	0.107759	0.112481	1	8.8	N	1	Supporting	Supp_preGC_I
FCA_GND8047885_ATTTCTGCATGTTGAC	2011	FCA_GND8047885	F81	female	CD45-	0.0304156	4307	0.154696	0.147458	1	8.8	N	1	Supporting	Supp_preGC_IIa
FCA_GND8047885_ATTTCTGCATTGGTAC	2115	FCA_GND8047885	F81	female	CD45-	0.0795796	3996	0.104762	0.0554324	1	8.8	N	1	Supporting	Supp_preGC_I
FCA_GND8047885_ATTTCTGGTCCCTTGT	1913	FCA_GND8047885	F81	female	CD45-	0.0521425	3874	0.128329	0.0937808	1	8.8	N	1	Supporting	Supp_preGC_IIb
FCA_GND8047885_ATTTCTGGTCTGCGGT	2002	FCA_GND8047885	F81	female	CD45-	0.0105408	4364	0.107759	0.0480507	1	8.8	N	1	Supporting	Supp_preGC_IIa
FCA_GND8047885_ATTTCTGGTGTGAAAT	2164	FCA_GND8047885	F81	female	CD45-	0.0475597	5614	0.0777385	0.0737564	1	8.8	N	1	Supporting	Supp_preGC_IIa
FCA_GND8047885_CAACCAAAGCGCCTCA	3116	FCA_GND8047885	F81	female	CD45-	0.0593913	8806	0.0568862	0.075718	1	8.8	N	1	Supporting	Supp_preGC_IIc
FCA_GND8047885_CAACCAAAGCTGAAAT	2264	FCA_GND8047885	F81	female	CD45-	0.0296832	6502	0.0664506	0.0614786	1	8.8	N	2	Mesenchymal_LHX9_ARX	Mesen_ovarianStroma
FCA_GND8047885_CAACCAAAGGATCGCA	2217	FCA_GND8047885	F81	female	CD45-	0.0304689	6761	0.0415584	0.0606932	1	8.8	N	2	Mesenchymal_LHX9_ARX	Mesen_ovarianStroma
FCA_GND8047885_CAACCAACAATAGCGG	1612	FCA_GND8047885	F81	female	CD45-	0.0224421	4144	0.0630915	0.075718	1	8.8	N	2	Mesenchymal_LHX9_ARX	Mesen_dorsalMesentery
FCA_GND8047885_CAACCAACACGACGAA	2304	FCA_GND8047885	F81	female	CD45-	0.0697286	4790	0.12093	0.11577	1	8.8	N	1	Supporting	Supp_preGC_I
FCA_GND8047885_CAACCAACATTTCACT	2329	FCA_GND8047885	F81	female	CD45-	0.0469064	5479	0.124555	0.114094	1	8.8	N	1	Supporting	Supp_preGC_IIa
FCA_GND8047885_CAACCAAGTCCGAAGA	1207	FCA_GND8047885	F81	female	CD45-	0.0360237	2193	0.0135831	0.0130112	1	8.8	N	0	Mesenchymal_GATA2_NR2F1	Mesenchymal_GATA2_NR2F1
FCA_GND8047885_CAACCAATCACTCCTG	2658	FCA_GND8047885	F81	female	CD45-	0.0680628	5539	0.0864662	0.0798206	1	8.8	N	1	Supporting	Supp_preGC_I
FCA_GND8047885_CAACCAATCATTTGGG	1333	FCA_GND8047885	F81	female	CD45-	0.0200388	3094	0.0461957	0.0404624	1	8.8	N	2	Mesenchymal_LHX9_ARX	Mesen_testisStroma
FCA_GND8047885_CAACCAATCGCCATAA	3268	FCA_GND8047885	F81	female	CD45-	0.0355834	10370	0.114094	0.0181832	1	8.8	N	0	Mesenchymal_GATA2_NR2F1	Mesenchymal_GATA2_NR2F1
FCA_GND8047885_CAACCAATCGTGACAT	2226	FCA_GND8047885	F81	female	CD45-	0.0676847	4846	0.154696	0.0798206	1	8.8	N	1	Supporting	Supp_preGC_I
FCA_GND8047885_CAACCAATCTATCCCG	2745	FCA_GND8047885	F81	female	CD45-	0.0695821	5648	0.128329	0.12093	1	8.8	N	1	Supporting	Supp_preGC_I
FCA_GND8047885_CAACCTCAGACAGACC	2811	FCA_GND8047885	F81	female	CD45-	0.0502255	6431	0.259259	0.126442	1	8.8	N	1	Supporting	Supp_preGC_I
FCA_GND8047885_CAACCTCAGGACATTA	3091	FCA_GND8047885	F81	female	CD45-	0.0204842	8055	0.15983	0.104762	1	8.8	N	1	Supporting	Supp_preGC_IIb
FCA_GND8047885_CAACCTCAGTCGATAA	1804	FCA_GND8047885	F81	female	CD45-	0.0786445	3128	0.0540146	0.0798206	1	8.8	N	1	Supporting	Supp_preGC_I
FCA_GND8047885_CAACCTCAGTTAGCGG	2439	FCA_GND8047885	F81	female	CD45-	0.0608041	5049	0.0512821	0.0664506	1	8.8	N	1	Supporting	Supp_sLGR5_female
FCA_GND8047885_CAACCTCCAATGAAAC	2956	FCA_GND8047885	F81	female	CD45-	0.0211101	8432	0.124555	0.0614786	1	8.8	N	0	Mesenchymal_GATA2_NR2F1	Mesen_ovarianStroma
FCA_GND8047885_CAACCTCCACGAAACG	2095	FCA_GND8047885	F81	female	CD45-	0.0278832	6061	0.0554324	0.0526316	1	8.8	N	2	Mesenchymal_LHX9_ARX	Mesen_ovarianStroma
FCA_GND8047885_CAACCTCCAGACGCCT	1676	FCA_GND8047885	F81	female	CD45-	0.0228091	4165	0.0737564	0.07	1	8.8	N	2	Mesenchymal_LHX9_ARX	Mesen_ovarianStroma
FCA_GND8047885_CAACCTCCAGCCAATT	2060	FCA_GND8047885	F81	female	CD45-	0.0295314	4673	0.154696	0.0499648	1	8.8	N	0	Mesenchymal_GATA2_NR2F1	Mesen_dorsalMesentery
FCA_GND8047885_CAACCTCGTCTGATCA	2309	FCA_GND8047885	F81	female	CD45-	0.0231163	5667	0.0777385	0.0718512	1	8.8	N	1	Supporting	Supp_preGC_IIa
FCA_GND8047885_CAACCTCGTGTTGGGA	1913	FCA_GND8047885	F81	female	CD45-	0.0326975	4771	0.07	0.0787796	1	8.8	N	2	Mesenchymal_LHX9_ARX	Mesen_ovarianStroma
FCA_GND8047885_CAACCTCGTTAGATGA	2404	FCA_GND8047885	F81	female	CD45-	0.0461674	4527	0.0777385	0.0554324	1	8.8	N	1	Supporting	Supp_preGC_I
FCA_GND8047885_CAACCTCTCCGAAGAG	2687	FCA_GND8047885	F81	female	CD45-	0.0649081	6255	0.22905	0.0888252	1	8.8	N	1	Supporting	Supp_preGC_I
FCA_GND8047885_CAACCTCTCGAACGGA	945	FCA_GND8047885	F81	female	CD45-	0.0393058	1959	0.0185093	0.0334129	1	8.8	N	0	Mesenchymal_GATA2_NR2F1	Mesenchymal_GATA2_NR2F1
FCA_GND8047885_CAACCTCTCGGCATCG	2899	FCA_GND8047885	F81	female	CD45-	0.027809	9781	0.0819672	0.0819672	1	8.8	N	9	PV	PV
FCA_GND8047885_CAACCTCTCGGCCGAT	2393	FCA_GND8047885	F81	female	CD45-	0.081448	5083	0.204082	0.0718512	1	8.8	N	1	Supporting	Supp_preGC_IIc
FCA_GND8047885_CAACCTCTCTTCAACT	2455	FCA_GND8047885	F81	female	CD45-	0.0170138	6818	0.0777385	0.0614786	1	8.8	N	2	Mesenchymal_LHX9_ARX	Mesen_ovarianStroma
FCA_GND8047885_CAACTAGAGCCAGGAT	2670	FCA_GND8047885	F81	female	CD45-	0.0490748	6215	0.0888252	0.0841813	1	8.8	N	1	Supporting	Supp_sLGR5_female
FCA_GND8047885_CAACTAGAGCGGATCA	2218	FCA_GND8047885	F81	female	CD45-	0.0241292	5512	0.132262	0.0937808	1	8.8	N	1	Supporting	Supp_preGC_IIb
FCA_GND8047885_CAACTAGCACAGGCCT	1288	FCA_GND8047885	F81	female	CD45-	0.0135482	2731	0.0178571	0.0272981	1	8.8	N	2	Mesenchymal_LHX9_ARX	Mesen_dorsalMesentery
FCA_GND8047885_CAACTAGCAGATCTGT	2073	FCA_GND8047885	F81	female	CD45-	0.0838253	5929	0.114094	0.0737564	1	8.8	N	0	Mesenchymal_GATA2_NR2F1	Mesen_ovarianStroma
FCA_GND8047885_CAACTAGCAGTATAAG	2333	FCA_GND8047885	F81	female	CD45-	0.0652309	4829	0.0540146	0.0664506	1	8.8	N	1	Supporting	Supp_sLGR5_female
FCA_GND8047885_CAACTAGCAGTCCTTC	2786	FCA_GND8047885	F81	female	CD45-	0.0638978	5947	0.12093	0.0841813	1	8.8	N	1	Supporting	Supp_sLGR5_female
FCA_GND8047885_CAACTAGGTCCGTCAG	1691	FCA_GND8047885	F81	female	CD45-	0.0308812	3983	0.0819672	0.0737564	1	8.8	N	0	Mesenchymal_GATA2_NR2F1	Mesen_dorsalMesentery
FCA_GND8047885_CAACTAGGTGAAGGCT	953	FCA_GND8047885	F81	female	CD45-	0.04	1850	0.0937808	0.0737564	1	8.8	N	0	Mesenchymal_GATA2_NR2F1	Mesen_dorsalMesentery
FCA_GND8047885_CAACTAGGTTAAAGAC	2487	FCA_GND8047885	F81	female	CD45-	0.0807852	5298	0.128329	0.0798206	1	8.8	N	1	Supporting	Supp_preGC_I
FCA_GND8047885_CAACTAGGTTAAAGTG	2190	FCA_GND8047885	F81	female	CD45-	0.0709772	4114	0.0614786	0.0526316	1	8.8	N	1	Supporting	Supp_preGC_I
FCA_GND8047885_CAACTAGTCAACACGT	2402	FCA_GND8047885	F81	female	CD45-	0.0542651	4994	0.0990807	0.0798206	1	8.8	N	1	Supporting	Supp_preGC_I
FCA_GND8047885_CAACTAGTCGGTTCGG	2785	FCA_GND8047885	F81	female	CD45-	0.0383243	8689	0.104762	0.0819672	1	8.8	N	9	PV	PV
FCA_GND8047885_CAAGAAAAGCGTCTAT	1772	FCA_GND8047885	F81	female	CD45-	0.03322	3823	0.165217	0.211909	1	8.8	N	1	Supporting	Supp_preGC_I
FCA_GND8047885_CAAGAAAAGCTGGAAC	2088	FCA_GND8047885	F81	female	CD45-	0.0426982	4403	0.0664506	0.0664506	1	8.8	N	1	Supporting	Supp_sLGR5_female
FCA_GND8047885_CAAGAAACAACTGCTA	1797	FCA_GND8047885	F81	female	CD45-	0.039801	3618	0.211909	0.15983	1	8.8	N	1	Supporting	Supp_preGC_I
FCA_GND8047885_CAAGAAACAATCTACG	1561	FCA_GND8047885	F81	female	CD45-	0.0358781	3707	0.0888252	0.07	1	8.8	N	2	Mesenchymal_LHX9_ARX	Mesen_ovarianStroma
FCA_GND8047885_CAAGAAACAGCTATTG	2029	FCA_GND8047885	F81	female	CD45-	0.0270506	5730	0.362398	0.165217	1	8.8	N	7	Endothelial	Endothelial
FCA_GND8047885_CAAGAAACATACTACG	2107	FCA_GND8047885	F81	female	CD45-	0.0710306	4308	0.101871	0.0937808	1	8.8	N	1	Supporting	Supp_sLGR5_female
FCA_GND8047885_CAAGAAACATATACCG	2071	FCA_GND8047885	F81	female	CD45-	0.0565483	4421	0.283186	0.0937808	1	8.8	N	1	Supporting	Supp_sLGR5_female
FCA_GND8047885_CAAGAAAGTAAGGGCT	1859	FCA_GND8047885	F81	female	CD45-	0.0467049	3490	0.0888252	0.0888252	1	8.8	N	1	Supporting	Supp_preGC_I
FCA_GND8047885_CAAGAAAGTACCGCTG	1671	FCA_GND8047885	F81	female	CD45-	0.0333731	4195	0.311005	0.0512821	1	8.8	N	5	Coel Epi	Supp_ovarianSurf
FCA_GND8047885_CAAGAAAGTAGCCTAT	1774	FCA_GND8047885	F81	female	CD45-	0.0476472	3379	0.154696	0.140645	1	8.8	N	1	Supporting	Supp_preGC_I
FCA_GND8047885_CAAGAAATCAACGGCC	1842	FCA_GND8047885	F81	female	CD45-	0.0397741	4073	0.145119	0.0963855	1	8.8	N	1	Supporting	Supp_preGC_IIc
FCA_GND8047885_CAAGAAATCCAGGGCT	1433	FCA_GND8047885	F81	female	CD45-	0.0554643	2434	0.0963855	0.15983	1	8.8	N	1	Supporting	Supp_sLGR5_female
FCA_GND8047885_CAAGAAATCGCTAGCG	1858	FCA_GND8047885	F81	female	CD45-	0.0732807	3548	0.110867	0.126442	1	8.8	N	1	Supporting	Supp_preGC_I
FCA_GND8047885_CAAGATCAGAAACCAT	2139	FCA_GND8047885	F81	female	CD45-	0.0209753	5578	0.0937808	0.0798206	1	8.8	N	1	Supporting	Supp_preGC_IIa
FCA_GND8047885_CAAGATCAGAGCTGGT	2423	FCA_GND8047885	F81	female	CD45-	0.0428853	7112	0.0937808	0.109313	1	8.8	N	2	Mesenchymal_LHX9_ARX	Mesen_ovarianStroma
FCA_GND8047885_CAAGATCCAAACAACA	2650	FCA_GND8047885	F81	female	CD45-	0.0102817	7100	0.0383407	0.0614786	1	8.8	N	1	Supporting	Supp_preGC_IIa
FCA_GND8047885_CAAGATCCAATGGATA	1438	FCA_GND8047885	F81	female	CD45-	0.0595287	2419	0.0315789	0.0798206	1	8.8	N	1	Supporting	Supp_preGC_I
FCA_GND8047885_CAAGATCGTGCACGAA	2467	FCA_GND8047885	F81	female	CD45-	0.0258878	6026	0.0737564	0.119188	1	8.8	N	1	Supporting	Supp_preGC_IIb
FCA_GND8047885_CAAGATCGTGTGCCTG	2059	FCA_GND8047885	F81	female	CD45-	0.0599676	4319	0.107759	0.101871	1	8.8	N	1	Supporting	Supp_preGC_I
FCA_GND8047885_CAAGATCGTTACGCGC	2334	FCA_GND8047885	F81	female	CD45-	0.0230648	5723	0.136364	0.109313	1	8.8	N	1	Supporting	Supp_preGC_IIa
FCA_GND8047885_CAAGATCTCGGTGTTA	2812	FCA_GND8047885	F81	female	CD45-	0.0197696	8245	0.176829	0.107759	1	8.8	N	1	Supporting	Supp_preGC_IIa
FCA_GND8047885_CAAGATCTCGTCACGG	2114	FCA_GND8047885	F81	female	CD45-	0.00976139	5532	0.0404624	0.0614786	1	8.8	N	1	Supporting	Supp_preGC_IIa
FCA_GND8047885_CAAGGCCAGATGGCGT	1718	FCA_GND8047885	F81	female	CD45-	0.073329	3082	0.0614786	0.0798206	1	8.8	N	1	Supporting	Supp_preGC_I
FCA_GND8047885_CAAGGCCAGCCACGTC	1979	FCA_GND8047885	F81	female	CD45-	0.0318373	4523	0.283186	0.0888252	1	8.8	N	1	Supporting	Supp_preGC_I
FCA_GND8047885_CAAGGCCAGTACACCT	1334	FCA_GND8047885	F81	female	CD45-	0.0316403	2402	0.00924703	0.0272981	1	8.8	N	0	Mesenchymal_GATA2_NR2F1	Mesenchymal_GATA2_NR2F1
FCA_GND8047885_CAAGGCCAGTGTCTCA	2095	FCA_GND8047885	F81	female	CD45-	0.0242114	7228	0.0315789	0.0606932	1	8.8	N	2	Mesenchymal_LHX9_ARX	Mesen_ovarianStroma
FCA_GND8047885_CAAGGCCCAACGATCT	2499	FCA_GND8047885	F81	female	CD45-	0.0121692	7067	0.136364	0.0787796	1	8.8	N	2	Mesenchymal_LHX9_ARX	Mesen_ovarianStroma
FCA_GND8047885_CAAGGCCCAAGTCATC	766	FCA_GND8047885	F81	female	CD45-	0.0675338	1999	0.196694	0.117446	1	8.8	N	9	PV	PV
FCA_GND8047885_CAAGGCCCAATGGAGC	2011	FCA_GND8047885	F81	female	CD45-	0.051296	3665	0.075718	0.11577	1	8.8	N	1	Supporting	Supp_preGC_I
FCA_GND8047885_CAAGGCCCACAGCGTC	1225	FCA_GND8047885	F81	female	CD45-	0.026648	2852	0.0614786	0.07	1	8.8	N	2	Mesenchymal_LHX9_ARX	Mesen_dorsalMesentery
FCA_GND8047885_CAAGGCCCATTAGCCA	2413	FCA_GND8047885	F81	female	CD45-	0.0488028	7643	0.0415584	0.07	1	8.8	N	2	Mesenchymal_LHX9_ARX	Mesen_ovarianStroma
FCA_GND8047885_CAAGGCCGTCACCCAG	2093	FCA_GND8047885	F81	female	CD45-	0.0286099	5942	0.0777385	0.07	1	8.8	N	2	Mesenchymal_LHX9_ARX	Mesen_ovarianStroma
FCA_GND8047885_CAAGGCCTCACTTATC	2431	FCA_GND8047885	F81	female	CD45-	0.0286738	6417	0.0864662	0.0888252	1	8.8	N	5	Coel Epi	Supp_ovarianSurf
FCA_GND8047885_CAAGGCCTCAGTACGT	2819	FCA_GND8047885	F81	female	CD45-	0.0462051	6298	0.283186	0.126442	1	8.8	N	1	Supporting	Supp_preGC_I
FCA_GND8047885_CAAGGCCTCCGATATG	2068	FCA_GND8047885	F81	female	CD45-	0.0103834	5008	0.0526316	0.0614786	1	8.8	N	1	Supporting	Supp_preGC_IIa
FCA_GND8047885_CAAGGCCTCGAGGTAG	3482	FCA_GND8047885	F81	female	CD45-	0.0704481	8815	0.12093	0.0664506	1	8.8	N	1	Supporting	Supp_sLGR5_female
FCA_GND8047885_CAAGGCCTCTCACATT	2244	FCA_GND8047885	F81	female	CD45-	0.0656011	4192	0.101871	0.104762	1	8.8	N	1	Supporting	Supp_preGC_I
FCA_GND8047885_CAAGTTGAGAGAGCTC	1344	FCA_GND8047885	F81	female	CD45-	0.0096452	2903	0.0363077	0.0404624	1	8.8	N	0	Mesenchymal_GATA2_NR2F1	Mesen_testisStroma
FCA_GND8047885_CAAGTTGAGGCGACAT	2877	FCA_GND8047885	F81	female	CD45-	0.0522035	6762	0.0888252	0.147458	1	8.8	N	1	Supporting	Supp_preGC_I
FCA_GND8047885_CAAGTTGAGGTAAACT	2791	FCA_GND8047885	F81	female	CD45-	0.0664242	6323	0.132262	0.11577	1	8.8	N	1	Supporting	Supp_preGC_I
FCA_GND8047885_CAAGTTGAGTAGGTGC	2176	FCA_GND8047885	F81	female	CD45-	0.0272158	5585	0.183099	0.114094	1	8.8	N	1	Supporting	Supp_preGC_IIa
FCA_GND8047885_CAAGTTGCAATGTAAG	2538	FCA_GND8047885	F81	female	CD45-	0.0652254	5412	0.183099	0.140645	1	8.8	N	1	Supporting	Supp_preGC_I
FCA_GND8047885_CAAGTTGCACGGTGTC	1924	FCA_GND8047885	F81	female	CD45-	0.0460951	3406	0.0963855	0.11577	1	8.8	N	1	Supporting	Supp_preGC_I
FCA_GND8047885_CAAGTTGCAGTACACT	1711	FCA_GND8047885	F81	female	CD45-	0.0706026	3286	0.154696	0.15983	1	8.8	N	1	Supporting	Supp_preGC_I
FCA_GND8047885_CAAGTTGCATCTGGTA	2092	FCA_GND8047885	F81	female	CD45-	0.0638097	4247	0.0438247	0.0554324	1	8.8	N	1	Supporting	Supp_preGC_I
FCA_GND8047885_CAAGTTGGTAAAGTCA	2974	FCA_GND8047885	F81	female	CD45-	0.0641462	7935	0.0819672	0.0900437	1	8.8	N	1	Supporting	Supp_preGC_IIa
FCA_GND8047885_CAAGTTGGTTAAAGAC	2400	FCA_GND8047885	F81	female	CD45-	0.0346139	5258	0.0819672	0.07	1	8.8	N	1	Supporting	Supp_preGC_IIb
FCA_GND8047885_CAAGTTGGTTTCCACC	2148	FCA_GND8047885	F81	female	CD45-	0.0519394	4486	0.0864662	0.0888252	1	8.8	N	1	Supporting	Supp_preGC_I
FCA_GND8047885_CAAGTTGTCAGGTAAA	1827	FCA_GND8047885	F81	female	CD45-	0.0237207	3752	0.136364	0.106369	1	8.8	N	1	Supporting	Supp_preGC_IIb
FCA_GND8047885_CAAGTTGTCCACGAAT	2655	FCA_GND8047885	F81	female	CD45-	0.0499919	6141	0.183099	0.075718	1	8.8	N	1	Supporting	Supp_preGC_I
FCA_GND8047885_CAAGTTGTCCCGGATG	3099	FCA_GND8047885	F81	female	CD45-	0.0689655	7163	0.189711	0.109313	1	8.8	N	1	Supporting	Supp_preGC_I
FCA_GND8047885_CACAAACAGACAAGCC	2320	FCA_GND8047885	F81	female	CD45-	0.0184319	7053	0.0486787	0.104762	1	8.8	N	1	Supporting	Supp_preGC_IIa
FCA_GND8047885_CACAAACAGCTACCTA	2688	FCA_GND8047885	F81	female	CD45-	0.0265569	6439	0.117446	0.0900437	1	8.8	N	1	Supporting	Supp_preGC_IIb
FCA_GND8047885_CACAAACAGGCGACAT	2880	FCA_GND8047885	F81	female	CD45-	0.0161084	7822	0.0647482	0.0718512	1	8.8	N	1	Supporting	Supp_preGC_IIa
FCA_GND8047885_CACAAACAGGTGCTTT	2338	FCA_GND8047885	F81	female	CD45-	0.0320303	5807	0.104762	0.0876457	1	8.8	N	2	Mesenchymal_LHX9_ARX	Mesen_ovarianStroma
FCA_GND8047885_CACAAACAGTATCTCG	2645	FCA_GND8047885	F81	female	CD45-	0.0873656	5208	0.0599078	0.11577	1	8.8	N	1	Supporting	Supp_sLGR5_female
FCA_GND8047885_CACAAACCAAGTTAAG	1514	FCA_GND8047885	F81	female	CD45-	0.0514888	3224	0.0289608	0.0298165	1	8.8	N	5	Coel Epi	Supp_ovarianSurf
FCA_GND8047885_CACAAACCACGTGAGA	1969	FCA_GND8047885	F81	female	CD45-	0.00772358	4920	0.0499648	0.0480507	1	8.8	N	1	Supporting	Supp_preGC_IIa
FCA_GND8047885_CACAAACCATCCGTGG	2223	FCA_GND8047885	F81	female	CD45-	0.011922	5536	0.0888252	0.0963855	1	8.8	N	1	Supporting	Supp_preGC_IIa
FCA_GND8047885_CACAAACTCTAACTTC	2077	FCA_GND8047885	F81	female	CD45-	0.0765056	3869	0.0614786	0.0526316	1	8.8	N	1	Supporting	Supp_preGC_I
FCA_GND8047885_CACACAAAGGGCTTGA	1880	FCA_GND8047885	F81	female	CD45-	0.0484882	3671	0.0540146	0.189711	1	8.8	N	1	Supporting	Supp_preGC_I
FCA_GND8047885_CACACAAAGTACTTGC	2427	FCA_GND8047885	F81	female	CD45-	0.0265347	5050	0.43038	0.211909	1	8.8	N	1	Supporting	Supp_preGC_I
FCA_GND8047885_CACACAAAGTTCGCGC	3492	FCA_GND8047885	F81	female	CD45-	0.0386462	8539	0.176829	0.0841813	1	8.8	N	1	Supporting	Supp_sLGR5_female
FCA_GND8047885_CACACAACAAACTGCT	1830	FCA_GND8047885	F81	female	CD45-	0.0280801	4594	0.101871	0.117446	1	8.8	N	7	Endothelial	Endothelial
FCA_GND8047885_CACACAACAGGGTATG	2371	FCA_GND8047885	F81	female	CD45-	0.0203312	6099	0.0737564	0.110867	1	8.8	N	1	Supporting	Supp_preGC_IIb
FCA_GND8047885_CACACAAGTGCACGAA	3686	FCA_GND8047885	F81	female	CD45-	0.0285714	10710	0.170877	0.104762	1	8.8	N	1	Supporting	Supp_preGC_I
FCA_GND8047885_CACACAAGTTCCTCCA	2513	FCA_GND8047885	F81	female	CD45-	0.0142023	6337	0.248509	0.104762	1	8.8	N	1	Supporting	Supp_sKITLG
FCA_GND8047885_CACACAATCAACACTG	1187	FCA_GND8047885	F81	female	CD45-	0.0285844	2204	0.0185093	0.0334129	1	8.8	N	0	Mesenchymal_GATA2_NR2F1	Mesenchymal_GATA2_NR2F1
FCA_GND8047885_CACACAATCAACCATG	2404	FCA_GND8047885	F81	female	CD45-	0.0763268	5031	0.149798	0.140645	1	8.8	N	1	Supporting	Supp_preGC_I
FCA_GND8047885_CACACAATCACCGTAA	1753	FCA_GND8047885	F81	female	CD45-	0.0177266	4513	0.0449966	0.0272981	1	8.8	N	0	Mesenchymal_GATA2_NR2F1	Mesen_dorsalMesentery
FCA_GND8047885_CACACAATCCTAGGGC	1392	FCA_GND8047885	F81	female	CD45-	0.0311603	2439	0.0888252	0.0888252	1	8.8	N	1	Supporting	Supp_preGC_I
FCA_GND8047885_CACACAATCGTTTATC	2281	FCA_GND8047885	F81	female	CD45-	0.0280418	6419	0.0630915	0.0526316	1	8.8	N	2	Mesenchymal_LHX9_ARX	Mesen_ovarianStroma
FCA_GND8047885_CACACAATCTTAGAGC	2858	FCA_GND8047885	F81	female	CD45-	0.0460222	7127	0.0798206	0.114094	1	8.8	N	1	Supporting	Supp_preGC_IIb
FCA_GND8047885_CACACCTAGAGGTACC	2582	FCA_GND8047885	F81	female	CD45-	0.0561551	5467	0.154696	0.112481	1	8.8	N	1	Supporting	Supp_preGC_I
FCA_GND8047885_CACACCTAGATAGTCA	4142	FCA_GND8047885	F81	female	CD45-	0.0189508	12981	0.145119	0.07	1	8.8	N	1	Supporting	Supp_preGC_IIb
FCA_GND8047885_CACACCTAGTAATCCC	2225	FCA_GND8047885	F81	female	CD45-	0.0679635	4164	0.0718512	0.0798206	1	8.8	N	1	Supporting	Supp_preGC_I
FCA_GND8047885_CACACCTAGTACACCT	2140	FCA_GND8047885	F81	female	CD45-	0.0392227	5609	0.0438247	0.07	1	8.8	N	2	Mesenchymal_LHX9_ARX	Mesen_ovarianStroma
FCA_GND8047885_CACACCTAGTGAACGC	3664	FCA_GND8047885	F81	female	CD45-	0.0364299	12627	0.489362	0.0876457	1	8.8	N	5	Coel Epi	Supp_coelEpi
FCA_GND8047885_CACACCTCAATGAATG	2825	FCA_GND8047885	F81	female	CD45-	0.021798	8487	0.07	0.0876457	1	8.8	N	2	Mesenchymal_LHX9_ARX	Mesen_ovarianStroma
FCA_GND8047885_CACACCTCACCCAGTG	2108	FCA_GND8047885	F81	female	CD45-	0.0350803	4732	0.128329	0.117446	1	8.8	N	7	Endothelial	Endothelial
FCA_GND8047885_CACACCTCACTCGACG	2137	FCA_GND8047885	F81	female	CD45-	0.0290835	5914	0.0682005	0.0554324	1	8.8	N	0	Mesenchymal_GATA2_NR2F1	Mesen_dorsalMesentery
FCA_GND8047885_CACACCTCAGATGAGC	2942	FCA_GND8047885	F81	female	CD45-	0.00493218	8110	0.0990807	0.0718512	1	8.8	N	1	Supporting	Supp_preGC_IIb
FCA_GND8047885_CACACCTCAGCTGGCT	2071	FCA_GND8047885	F81	female	CD45-	0.0605574	4987	0.114094	0.0664506	1	8.8	N	2	Mesenchymal_LHX9_ARX	Mesen_ovarianStroma
FCA_GND8047885_CACACCTCATATACCG	2255	FCA_GND8047885	F81	female	CD45-	0.0257526	5747	0.104762	0.109313	1	8.8	N	1	Supporting	Supp_preGC_IIa
FCA_GND8047885_CACACCTGTACTCGCG	2422	FCA_GND8047885	F81	female	CD45-	0.0452308	6500	0.0568862	0.0718512	1	8.8	N	2	Mesenchymal_LHX9_ARX	Mesen_ovarianStroma
FCA_GND8047885_CACACCTGTACTTCTT	4027	FCA_GND8047885	F81	female	CD45-	0.0356141	11765	0.43038	0.43038	0	8.8	N	7	Endothelial	Endothelial
FCA_GND8047885_CACACCTGTCCGAACC	2248	FCA_GND8047885	F81	female	CD45-	0.0350477	4822	0.0937808	0.0937808	1	8.8	N	1	Supporting	Supp_sLGR5_female
FCA_GND8047885_CACACCTGTGCACTTA	2704	FCA_GND8047885	F81	female	CD45-	0.0187999	6383	0.211909	0.128329	1	8.8	N	1	Supporting	Supp_preGC_I
FCA_GND8047885_CACACCTTCAATCTCT	3215	FCA_GND8047885	F81	female	CD45-	0.0274922	8657	0.170877	0.114094	1	8.8	N	1	Supporting	Supp_preGC_IIb
FCA_GND8047885_CACACCTTCACCGTAA	3108	FCA_GND8047885	F81	female	CD45-	0.107622	7006	0.0888252	0.104762	1	8.8	N	1	Supporting	Supp_preGC_I
FCA_GND8047885_CACACCTTCGTGGACC	2713	FCA_GND8047885	F81	female	CD45-	0.0498339	5418	0.0864662	0.0777385	1	8.8	N	1	Supporting	Supp_preGC_I
FCA_GND8047885_CACACCTTCGTGGGAA	3335	FCA_GND8047885	F81	female	CD45-	0.020938	7164	0.405405	0.0900437	1	8.8	N	1	Supporting	Supp_preGC_I
FCA_GND8047885_CACACCTTCGTTTATC	2565	FCA_GND8047885	F81	female	CD45-	0.033911	6694	0.0583776	0.0787796	1	8.8	N	2	Mesenchymal_LHX9_ARX	Mesen_ovarianStroma
FCA_GND8047885_CACACTCAGATATGGT	2916	FCA_GND8047885	F81	female	CD45-	0.00226909	7492	0.0461957	0.07	1	8.8	N	1	Supporting	Supp_preGC_IIb
FCA_GND8047885_CACACTCAGCCACCTG	2167	FCA_GND8047885	F81	female	CD45-	0.0644536	4127	0.114094	0.11577	1	8.8	N	1	Supporting	Supp_preGC_I
FCA_GND8047885_CACACTCAGGACATTA	2714	FCA_GND8047885	F81	female	CD45-	0.0346942	7177	0.0777385	0.075718	1	8.8	N	0	Mesenchymal_GATA2_NR2F1	Mesenchymal_GATA2_NR2F1
FCA_GND8047885_CACACTCAGGGTCTCC	2218	FCA_GND8047885	F81	female	CD45-	0.0190393	5725	0.0841813	0.075718	1	8.8	N	0	Mesenchymal_GATA2_NR2F1	Mesenchymal_GATA2_NR2F1
FCA_GND8047885_CACACTCAGTAGCCGA	1244	FCA_GND8047885	F81	female	CD45-	0.0636486	2231	0.0147549	0.0737564	1	8.8	N	0	Mesenchymal_GATA2_NR2F1	Mesenchymal_GATA2_NR2F1
FCA_GND8047885_CACACTCCACTACAGT	1538	FCA_GND8047885	F81	female	CD45-	0.0239617	3756	0.0315789	0.0334129	1	8.8	N	0	Mesenchymal_GATA2_NR2F1	Mesen_dorsalMesentery
FCA_GND8047885_CACACTCCAGGTGCCT	1818	FCA_GND8047885	F81	female	CD45-	0.0097561	3895	0.0777385	0.117446	1	8.8	N	1	Supporting	Supp_preGC_IIb
FCA_GND8047885_CACACTCCAGTCGTGC	2346	FCA_GND8047885	F81	female	CD45-	0.02605	5643	0.238462	0.15983	1	8.8	N	1	Supporting	Supp_preGC_IIa
FCA_GND8047885_CACACTCCATCCTTGC	3332	FCA_GND8047885	F81	female	CD45-	0.0339604	10100	0.196694	0.0963855	1	8.8	N	7	Endothelial	Endothelial
FCA_GND8047885_CACACTCGTACCGAGA	2517	FCA_GND8047885	F81	female	CD45-	0.0422607	5892	0.0647482	0.147458	1	8.8	N	1	Supporting	Supp_preGC_I
FCA_GND8047885_CACACTCGTCGTTGTA	1081	FCA_GND8047885	F81	female	CD45-	0.0214286	2660	0.0718512	0.07	1	8.8	N	2	Mesenchymal_LHX9_ARX	Mesen_ovarianStroma
FCA_GND8047885_CACACTCGTTCAGACT	2148	FCA_GND8047885	F81	female	CD45-	0.0290488	5267	0.140645	0.109313	1	8.8	N	1	Supporting	Supp_preGC_IIa
FCA_GND8047885_CACACTCTCATTTGGG	2226	FCA_GND8047885	F81	female	CD45-	0.0105865	5951	0.0474227	0.0410827	1	8.8	N	1	Supporting	Supp_preGC_IIb
FCA_GND8047885_CACACTCTCCAAACAC	2379	FCA_GND8047885	F81	female	CD45-	0.0577778	4725	0.0912621	0.0554324	1	8.8	N	1	Supporting	Supp_preGC_I
FCA_GND8047885_CACACTCTCCAAGTAC	2106	FCA_GND8047885	F81	female	CD45-	0.0584795	3762	0.114094	0.0526316	1	8.8	N	1	Supporting	Supp_preGC_I
FCA_GND8047885_CACACTCTCGTCCAGG	2046	FCA_GND8047885	F81	female	CD45-	0.0187536	5279	0.107759	0.0614786	1	8.8	N	1	Supporting	Supp_preGC_IIa
FCA_GND8047885_CACAGGCAGCGTGAAC	2148	FCA_GND8047885	F81	female	CD45-	0.0677337	4311	0.170877	0.109313	1	8.8	N	1	Supporting	Supp_preGC_I
FCA_GND8047885_CACAGGCAGGACACCA	2744	FCA_GND8047885	F81	female	CD45-	0.0369548	6305	0.283186	0.0841813	1	8.8	N	1	Supporting	Supp_sLGR5_female
FCA_GND8047885_CACAGGCGTAATTGGA	1745	FCA_GND8047885	F81	female	CD45-	0.0499879	4141	0.0682005	0.147458	1	8.8	N	1	Supporting	Supp_preGC_IIa
FCA_GND8047885_CACAGGCGTGCACCAC	2315	FCA_GND8047885	F81	female	CD45-	0.0115333	6763	0.0682005	0.0777385	1	8.8	N	5	Coel Epi	Supp_ovarianSurf
FCA_GND8047885_CACAGGCGTTTGTTGG	1200	FCA_GND8047885	F81	female	CD45-	0.0293494	2828	0.0415584	0.0526316	1	8.8	N	2	Mesenchymal_LHX9_ARX	Mesen_testisStroma
FCA_GND8047885_CACAGGCTCAACGAAA	3239	FCA_GND8047885	F81	female	CD45-	0.00961685	6551	0.0415584	0.11577	1	8.8	N	1	Supporting	Supp_preGC_I
FCA_GND8047885_CACAGGCTCACTGGGC	2995	FCA_GND8047885	F81	female	CD45-	0.0632109	6945	0.145119	0.211909	1	8.8	N	1	Supporting	Supp_preGC_IIc
FCA_GND8047885_CACAGGCTCCAGATCA	1789	FCA_GND8047885	F81	female	CD45-	0.0218944	4339	0.0486787	0.0404624	1	8.8	N	0	Mesenchymal_GATA2_NR2F1	Mesenchymal_GATA2_NR2F1
FCA_GND8047885_CACAGGCTCCGCGGTA	2318	FCA_GND8047885	F81	female	CD45-	0.0258475	5339	0.0718512	0.0682005	1	8.8	N	1	Supporting	Supp_preGC_IIa
FCA_GND8047885_CACAGGCTCCTTAATC	2236	FCA_GND8047885	F81	female	CD45-	0.0341637	4215	0.0718512	0.104762	1	8.8	N	1	Supporting	Supp_preGC_I
FCA_GND8047885_CACAGGCTCTATCGCC	1856	FCA_GND8047885	F81	female	CD45-	0.0246761	4863	0.104762	0.0912621	1	8.8	N	9	PV	PV
FCA_GND8047885_CACAGGCTCTCGAGTA	2179	FCA_GND8047885	F81	female	CD45-	0.0580931	4510	0.248509	0.140645	1	8.8	N	1	Supporting	Supp_preGC_I
FCA_GND8047885_CACAGTAAGATATGCA	1981	FCA_GND8047885	F81	female	CD45-	0.0302666	5815	0.0647482	0.0614786	1	8.8	N	9	PV	PV
FCA_GND8047885_CACAGTACAATAGAGT	1649	FCA_GND8047885	F81	female	CD45-	0.0494549	3761	0.0583776	0.109313	1	8.8	N	2	Mesenchymal_LHX9_ARX	Mesen_ovarianStroma
FCA_GND8047885_CACAGTACAGCCTATA	2342	FCA_GND8047885	F81	female	CD45-	0.0514507	5170	0.0937808	0.0888252	1	8.8	N	1	Supporting	Supp_preGC_I
FCA_GND8047885_CACAGTACATGAACCT	2198	FCA_GND8047885	F81	female	CD45-	0.0261179	5054	0.07	0.0777385	1	8.8	N	5	Coel Epi	Supp_ovarianSurf
FCA_GND8047885_CACAGTAGTAGCGATG	3029	FCA_GND8047885	F81	female	CD45-	0.0158629	9393	0.270789	0.128329	1	8.8	N	5	Coel Epi	Supp_coelEpi
FCA_GND8047885_CACAGTAGTCGGCACT	2443	FCA_GND8047885	F81	female	CD45-	0.0169164	6207	0.0664506	0.107759	1	8.8	N	1	Supporting	Supp_preGC_IIa
FCA_GND8047885_CACAGTAGTGCCTGTG	2695	FCA_GND8047885	F81	female	CD45-	0.0444189	8690	0.104762	0.128329	1	8.8	N	0	Mesenchymal_GATA2_NR2F1	Mesenchymal_GATA2_NR2F1
FCA_GND8047885_CACAGTAGTTAAAGAC	2798	FCA_GND8047885	F81	female	CD45-	0.00751275	7454	0.0198473	0.0415584	1	8.8	N	1	Supporting	Supp_preGC_IIb
FCA_GND8047885_CACAGTATCACAAACC	2058	FCA_GND8047885	F81	female	CD45-	0.0428994	4056	0.0937808	0.0937808	1	8.8	N	1	Supporting	Supp_sLGR5_female
FCA_GND8047885_CACAGTATCACTTACT	2043	FCA_GND8047885	F81	female	CD45-	0.0098324	4475	0.132262	0.128329	1	8.8	N	1	Supporting	Supp_preGC_I
FCA_GND8047885_CACAGTATCAGCTGGC	1646	FCA_GND8047885	F81	female	CD45-	0.0401299	4311	0.0383407	0.0547235	1	8.8	N	2	Mesenchymal_LHX9_ARX	Mesen_ovarianStroma
FCA_GND8047885_CACAGTATCAGTTCGA	2221	FCA_GND8047885	F81	female	CD45-	0.0244714	6007	0.0819672	0.07	1	8.8	N	2	Mesenchymal_LHX9_ARX	Mesen_ovarianStroma
FCA_GND8047885_CACAGTATCCACTCCA	1404	FCA_GND8047885	F81	female	CD45-	0.0264016	3068	0.0298165	0.0404624	1	8.8	N	0	Mesenchymal_GATA2_NR2F1	Mesen_dorsalMesentery
FCA_GND8047885_CACAGTATCCATTCTA	2152	FCA_GND8047885	F81	female	CD45-	0.0402424	4125	0.107759	0.0664506	1	8.8	N	1	Supporting	Supp_sLGR5_female
FCA_GND8047885_CACAGTATCCCTAACC	3122	FCA_GND8047885	F81	female	CD45-	0.0316136	9711	0.07	0.114094	1	8.8	N	1	Supporting	Supp_preGC_IIa
FCA_GND8047885_CACAGTATCCTCCTAG	2782	FCA_GND8047885	F81	female	CD45-	0.049522	6381	0.248509	0.211909	1	8.8	N	1	Supporting	Supp_preGC_I
FCA_GND8047885_CACAGTATCGGCATCG	1874	FCA_GND8047885	F81	female	CD45-	0.0052299	4589	0.0306891	0.0614786	1	8.8	N	1	Supporting	Supp_preGC_IIa
FCA_GND8047885_CACAGTATCGTCCGTT	1787	FCA_GND8047885	F81	female	CD45-	0.0197924	4143	0.0212325	0.0272981	1	8.8	N	0	Mesenchymal_GATA2_NR2F1	Mesenchymal_GATA2_NR2F1
FCA_GND8047885_CACAGTATCTACCAGA	2364	FCA_GND8047885	F81	female	CD45-	0.0377818	6564	0.0864662	0.0950832	1	8.8	N	7	Endothelial	Endothelial
FCA_GND8047885_CACAGTATCTGCAAGT	2557	FCA_GND8047885	F81	female	CD45-	0.0749192	5259	0.136364	0.12093	1	8.8	N	1	Supporting	Supp_preGC_I
FCA_GND8047885_CACAGTATCTGTACGA	3258	FCA_GND8047885	F81	female	CD45-	0.0193112	8130	0.104762	0.114094	1	8.8	N	1	Supporting	Supp_preGC_IIb
FCA_GND8047885_CACATAGAGAAGGTGA	1748	FCA_GND8047885	F81	female	CD45-	0.0327515	5099	0.0289608	0.109313	1	8.8	N	2	Mesenchymal_LHX9_ARX	Mesen_ovarianStroma
FCA_GND8047885_CACATAGAGACAAAGG	2100	FCA_GND8047885	F81	female	CD45-	0.0598787	3791	0.15983	0.15983	1	8.8	N	1	Supporting	Supp_preGC_I
FCA_GND8047885_CACATAGAGGTAGCCA	2900	FCA_GND8047885	F81	female	CD45-	0.0705394	6748	0.165217	0.211909	1	8.8	N	1	Supporting	Supp_preGC_I
FCA_GND8047885_CACATAGAGTCCTCCT	2265	FCA_GND8047885	F81	female	CD45-	0.00862415	4986	0.0819672	0.111055	1	8.8	N	1	Supporting	Supp_preGC_IIb
FCA_GND8047885_CACATAGCAATAACGA	1929	FCA_GND8047885	F81	female	CD45-	0.0551265	3755	0.196694	0.15983	1	8.8	N	1	Supporting	Supp_preGC_I
FCA_GND8047885_CACATAGCAATGAATG	1331	FCA_GND8047885	F81	female	CD45-	0.0310978	2669	0.0526316	0.0876457	1	8.8	N	2	Mesenchymal_LHX9_ARX	Mesen_ovarianStroma
FCA_GND8047885_CACATAGCACCAGGCT	2035	FCA_GND8047885	F81	female	CD45-	0.0289901	6278	0.0614786	0.0718512	1	8.8	N	2	Mesenchymal_LHX9_ARX	Mesen_ovarianStroma
FCA_GND8047885_CACATAGCACTGTCGG	1916	FCA_GND8047885	F81	female	CD45-	0.0321799	4537	0.104762	0.0606932	1	8.8	N	2	Mesenchymal_LHX9_ARX	Mesen_ovarianStroma
FCA_GND8047885_CACATAGCATCTCCCA	2014	FCA_GND8047885	F81	female	CD45-	0.0374271	5317	0.0486787	0.0606932	1	8.8	N	5	Coel Epi	Supp_ovarianSurf
FCA_GND8047885_CACATAGCATGCCCGA	2472	FCA_GND8047885	F81	female	CD45-	0.0183179	6278	0.128329	0.0937808	1	8.8	N	1	Supporting	Supp_preGC_IIb
FCA_GND8047885_CACATAGGTACTCGCG	3400	FCA_GND8047885	F81	female	CD45-	0.0597372	8370	0.132262	0.0798206	1	8.8	N	1	Supporting	Supp_preGC_I
FCA_GND8047885_CACATAGGTTGTTTGG	2116	FCA_GND8047885	F81	female	CD45-	0.0130745	5048	0.0682005	0.0614786	1	8.8	N	1	Supporting	Supp_preGC_IIa
FCA_GND8047885_CACATAGTCGGTTAAC	2146	FCA_GND8047885	F81	female	CD45-	0.0689327	4207	0.0990807	0.109313	1	8.8	N	1	Supporting	Supp_preGC_I
FCA_GND8047885_CACATAGTCGTGGTCG	1542	FCA_GND8047885	F81	female	CD45-	0.0981067	2905	0.0474227	0.0777385	1	8.8	N	1	Supporting	Supp_preGC_I
FCA_GND8047885_CACATAGTCTTGTACT	2773	FCA_GND8047885	F81	female	CD45-	0.0590312	7081	0.154696	0.119188	1	8.8	N	1	Supporting	Supp_preGC_I
FCA_GND8047885_CACATTTAGCTGGAAC	3461	FCA_GND8047885	F81	female	CD45-	0.0516849	8784	0.489362	0.238462	0.826584	8.8	N	1	Supporting	Supp_preGC_IIc
FCA_GND8047885_CACATTTAGGCGACAT	1073	FCA_GND8047885	F81	female	CD45-	0.0496454	2256	0.034358	0.0554324	1	8.8	N	0	Mesenchymal_GATA2_NR2F1	Mesen_dorsalMesentery
FCA_GND8047885_CACATTTCAAGTTCTG	2022	FCA_GND8047885	F81	female	CD45-	0.00687285	4656	0.0990807	0.0737564	1	8.8	N	1	Supporting	Supp_preGC_IIb
FCA_GND8047885_CACATTTCAGAGTGTG	3316	FCA_GND8047885	F81	female	CD45-	0.0409646	9911	0.0664506	0.0900437	1	8.8	N	1	Supporting	Supp_preGC_I
FCA_GND8047885_CACATTTGTCTCCCTA	1889	FCA_GND8047885	F81	female	CD45-	0.0581717	3971	0.149798	0.15983	1	8.8	N	1	Supporting	Supp_preGC_I
FCA_GND8047885_CACATTTGTCTTTCAT	3363	FCA_GND8047885	F81	female	CD45-	0.0481733	9881	0.128329	0.0900437	1	8.8	N	1	Supporting	Supp_preGC_IIb
FCA_GND8047885_CACATTTGTTGGGACA	1147	FCA_GND8047885	F81	female	CD45-	0.0432352	2683	0.0526316	0.0876457	1	8.8	N	2	Mesenchymal_LHX9_ARX	Mesen_ovarianStroma
FCA_GND8047885_CACATTTTCATGTCTT	2548	FCA_GND8047885	F81	female	CD45-	0.00629235	6198	0.0526316	0.07	1	8.8	N	1	Supporting	Supp_preGC_IIb
FCA_GND8047885_CACATTTTCGCTTAGA	2328	FCA_GND8047885	F81	female	CD45-	0.048	5000	0.154696	0.0841813	1	8.8	N	1	Supporting	Supp_preGC_I
FCA_GND8047885_CACATTTTCTAACTGG	1743	FCA_GND8047885	F81	female	CD45-	0.031099	3312	0.0241546	0.0554324	1	8.8	N	1	Supporting	Supp_preGC_I
FCA_GND8047885_CACATTTTCTAACTTC	2248	FCA_GND8047885	F81	female	CD45-	0.0287685	5075	0.0583776	0.0614786	1	8.8	N	2	Mesenchymal_LHX9_ARX	Mesen_ovarianStroma
FCA_GND8047885_CACCACTAGCCACCTG	2458	FCA_GND8047885	F81	female	CD45-	0.0509957	5373	0.07	0.0554324	1	8.8	N	1	Supporting	Supp_preGC_I
FCA_GND8047885_CACCACTAGGTCATCT	2789	FCA_GND8047885	F81	female	CD45-	0.0153183	6724	0.165217	0.114094	1	8.8	N	1	Supporting	Supp_preGC_IIb
FCA_GND8047885_CACCACTAGTCATGCT	2571	FCA_GND8047885	F81	female	CD45-	0.0458105	5108	0.0526316	0.0554324	1	8.8	N	1	Supporting	Supp_preGC_I
FCA_GND8047885_CACCACTAGTGTTTGC	2214	FCA_GND8047885	F81	female	CD45-	0.0463222	4296	0.0864662	0.0777385	1	8.8	N	1	Supporting	Supp_preGC_I
FCA_GND8047885_CACCACTCAAGGTTCT	2827	FCA_GND8047885	F81	female	CD45-	0.0307439	7286	0.132262	0.114094	1	8.8	N	1	Supporting	Supp_preGC_IIb
FCA_GND8047885_CACCACTCAATAGCGG	1784	FCA_GND8047885	F81	female	CD45-	0.0189252	4280	0.114094	0.0404624	1	8.8	N	2	Mesenchymal_LHX9_ARX	Mesen_dorsalMesentery
FCA_GND8047885_CACCACTCAGGATTGG	1778	FCA_GND8047885	F81	female	CD45-	0.0240995	3859	0.0426789	0.0591427	1	8.8	N	7	Endothelial	Endothelial
FCA_GND8047885_CACCACTCAGGTCGTC	1304	FCA_GND8047885	F81	female	CD45-	0.0497395	2111	0.075718	0.140645	1	8.8	N	1	Supporting	Supp_preGC_I
FCA_GND8047885_CACCACTGTAAGCACG	1924	FCA_GND8047885	F81	female	CD45-	0.0526606	3627	0.0474227	0.0599078	1	8.8	N	1	Supporting	Supp_preGC_I
FCA_GND8047885_CACCACTGTAAGGGCT	2444	FCA_GND8047885	F81	female	CD45-	0.0608373	4849	0.145119	0.12093	1	8.8	N	1	Supporting	Supp_sLGR5_female
FCA_GND8047885_CACCACTGTAAGTTCC	2761	FCA_GND8047885	F81	female	CD45-	0.021164	6993	0.183099	0.107759	1	8.8	N	1	Supporting	Supp_sKITLG
FCA_GND8047885_CACCACTGTATAAACG	3223	FCA_GND8047885	F81	female	CD45-	0.012735	8245	0.136364	0.15983	1	8.8	N	1	Supporting	Supp_preGC_IIb
FCA_GND8047885_CACCACTGTGCGAAAC	2525	FCA_GND8047885	F81	female	CD45-	0.0448303	7718	0.0798206	0.0526316	1	8.8	N	2	Mesenchymal_LHX9_ARX	Mesen_ovarianStroma
FCA_GND8047885_CACCACTGTGTGGCTC	2782	FCA_GND8047885	F81	female	CD45-	0.0696052	5876	0.0554324	0.11577	1	8.8	N	1	Supporting	Supp_preGC_I
FCA_GND8047885_CACCACTGTTAGGGTG	2832	FCA_GND8047885	F81	female	CD45-	0.0183824	8160	0.0185093	0.0298165	1	8.8	N	5	Coel Epi	Supp_ovarianSurf
FCA_GND8047885_CACCAGGAGAAACCTA	3204	FCA_GND8047885	F81	female	CD45-	0.0284794	7760	0.0512821	0.114094	1	8.8	N	1	Supporting	Supp_preGC_IIb
FCA_GND8047885_CACCAGGAGACACTAA	2541	FCA_GND8047885	F81	female	CD45-	0.0465748	5153	0.0512821	0.0526316	1	8.8	N	1	Supporting	Supp_preGC_I
FCA_GND8047885_CACCAGGAGGCAGTCA	2403	FCA_GND8047885	F81	female	CD45-	0.0083779	5610	0.0963855	0.0718512	1	8.8	N	1	Supporting	Supp_preGC_IIb
FCA_GND8047885_CACCAGGCAAACTGCT	2173	FCA_GND8047885	F81	female	CD45-	0.0456668	3854	0.136364	0.0526316	1	8.8	N	1	Supporting	Supp_preGC_I
FCA_GND8047885_CACCAGGCACATCCAA	1314	FCA_GND8047885	F81	female	CD45-	0.0258847	3052	0.00924703	0.0272981	1	8.8	N	0	Mesenchymal_GATA2_NR2F1	Mesenchymal_GATA2_NR2F1
FCA_GND8047885_CACCAGGCACGGTAAG	1833	FCA_GND8047885	F81	female	CD45-	0.0291588	4767	0.07	0.0647482	1	8.8	N	5	Coel Epi	Supp_coelEpi
FCA_GND8047885_CACCAGGGTCCGCTGA	2411	FCA_GND8047885	F81	female	CD45-	0.0407478	6847	0.0415584	0.109313	1	8.8	N	1	Supporting	Supp_preGC_IIa
FCA_GND8047885_CACCAGGTCGTACGGC	1760	FCA_GND8047885	F81	female	CD45-	0.00872981	4582	0.0449966	0.0614786	1	8.8	N	1	Supporting	Supp_preGC_IIa
FCA_GND8047885_CACCTTGAGCTGCCCA	2798	FCA_GND8047885	F81	female	CD45-	0.0254684	6832	0.0888252	0.0888252	1	8.8	N	1	Supporting	Supp_preGC_I
FCA_GND8047885_CACCTTGAGGGTATCG	1867	FCA_GND8047885	F81	female	CD45-	0.0374875	5015	0.0664506	0.0614786	1	8.8	N	2	Mesenchymal_LHX9_ARX	Mesen_ovarianStroma
FCA_GND8047885_CACCTTGCAATGTTGC	2722	FCA_GND8047885	F81	female	CD45-	0.0453889	6235	0.183099	0.104762	1	8.8	N	1	Supporting	Supp_preGC_I
FCA_GND8047885_CACCTTGCACAGAGGT	2211	FCA_GND8047885	F81	female	CD45-	0.0470463	6568	0.0630915	0.0664506	1	8.8	N	2	Mesenchymal_LHX9_ARX	Mesen_ovarianStroma
FCA_GND8047885_CACCTTGCACTATCTT	2170	FCA_GND8047885	F81	female	CD45-	0.00881226	5220	0.0499648	0.106369	1	8.8	N	1	Supporting	Supp_preGC_IIa
FCA_GND8047885_CACCTTGGTACATGTC	2511	FCA_GND8047885	F81	female	CD45-	0.0154621	5756	0.0798206	0.0900437	1	8.8	N	1	Supporting	Supp_preGC_IIb
FCA_GND8047885_CACCTTGGTCAGCTAT	1859	FCA_GND8047885	F81	female	CD45-	0.00716915	5161	0.0449966	0.0682005	1	8.8	N	1	Supporting	Supp_preGC_IIa
FCA_GND8047885_CACCTTGGTCCATCCT	2878	FCA_GND8047885	F81	female	CD45-	0.034196	8539	0.12093	0.0841813	1	8.8	N	0	Mesenchymal_GATA2_NR2F1	Mesenchymal_GATA2_NR2F1
FCA_GND8047885_CACCTTGGTCGGCATC	3259	FCA_GND8047885	F81	female	CD45-	0.0590414	8638	0.117446	0.075718	1	8.8	N	1	Supporting	Supp_preGC_I
FCA_GND8047885_CACCTTGGTTCATGGT	2843	FCA_GND8047885	F81	female	CD45-	0.032119	6725	0.15983	0.0808939	1	8.8	N	1	Supporting	Supp_preGC_IIb
FCA_GND8047885_CACCTTGTCAGTCAGT	2930	FCA_GND8047885	F81	female	CD45-	0.0245614	7695	0.075718	0.111055	1	8.8	N	1	Supporting	Supp_preGC_IIb
FCA_GND8047885_CACCTTGTCCAAATGC	2645	FCA_GND8047885	F81	female	CD45-	0.0552036	5525	0.0486787	0.0777385	1	8.8	N	1	Supporting	Supp_preGC_I
FCA_GND8047885_CACCTTGTCCAATGGT	3115	FCA_GND8047885	F81	female	CD45-	0.00843475	8299	0.07	0.0808939	1	8.8	N	1	Supporting	Supp_preGC_IIb
FCA_GND8047885_CACCTTGTCGCGCCAA	2623	FCA_GND8047885	F81	female	CD45-	0.0506983	5227	0.0438247	0.0554324	1	8.8	N	1	Supporting	Supp_preGC_I
FCA_GND8047885_CACCTTGTCTGCTTGC	2313	FCA_GND8047885	F81	female	CD45-	0.0298246	5700	0.0363077	0.128329	1	8.8	N	5	Coel Epi	Supp_ovarianSurf
FCA_GND8047885_CACTCCAAGGTGCAAC	2558	FCA_GND8047885	F81	female	CD45-	0.0566706	5082	0.0526316	0.0777385	1	8.8	N	1	Supporting	Supp_preGC_I
FCA_GND8047885_CACTCCAAGTGGGATC	2067	FCA_GND8047885	F81	female	CD45-	0.0287174	5676	0.0718512	0.0963855	1	8.8	N	1	Supporting	Supp_preGC_IIa
FCA_GND8047885_CACTCCACACATCCAA	2302	FCA_GND8047885	F81	female	CD45-	0.026411	5528	0.114094	0.075718	1	8.8	N	0	Mesenchymal_GATA2_NR2F1	Mesenchymal_GATA2_NR2F1
FCA_GND8047885_CACTCCACACCGCTAG	2148	FCA_GND8047885	F81	female	CD45-	0.0311746	4972	0.0614786	0.128329	1	8.8	N	1	Supporting	Supp_ovarianSurf
FCA_GND8047885_CACTCCACACCGTTGG	2827	FCA_GND8047885	F81	female	CD45-	0.0155098	6512	0.034358	0.0808939	1	8.8	N	1	Supporting	Supp_preGC_IIb
FCA_GND8047885_CACTCCACAGCTGGCT	1241	FCA_GND8047885	F81	female	CD45-	0.0815637	2072	0.0486787	0.0599078	1	8.8	N	1	Supporting	Supp_preGC_I
FCA_GND8047885_CACTCCACATGCCACG	3497	FCA_GND8047885	F81	female	CD45-	0.00655093	9159	0.0647482	0.0410827	1	8.8	N	1	Supporting	Supp_preGC_IIb
FCA_GND8047885_CACTCCAGTAGGAGTC	3045	FCA_GND8047885	F81	female	CD45-	0.0482639	6941	0.183099	0.11577	1	8.8	N	1	Supporting	Supp_preGC_I
FCA_GND8047885_CACTCCAGTCGACTGC	1740	FCA_GND8047885	F81	female	CD45-	0.0558022	3154	0.189711	0.112481	1	8.8	N	1	Supporting	Supp_preGC_I
FCA_GND8047885_CACTCCAGTGCAACGA	2457	FCA_GND8047885	F81	female	CD45-	0.0462485	5038	0.0888252	0.0777385	1	8.8	N	1	Supporting	Supp_preGC_I
FCA_GND8047885_CACTCCATCAAAGACA	1326	FCA_GND8047885	F81	female	CD45-	0.0374368	2965	0.114094	0.0798206	1	8.8	N	1	Supporting	Supp_preGC_IIa
FCA_GND8047885_CACTCCATCCAGATCA	2276	FCA_GND8047885	F81	female	CD45-	0.0188995	4180	0.0540146	0.0900437	1	8.8	N	1	Supporting	Supp_preGC_IIb
FCA_GND8047885_CACTCCATCCCTCTTT	2909	FCA_GND8047885	F81	female	CD45-	0.0258887	7455	0.211909	0.110867	1	8.8	N	1	Supporting	Supp_preGC_I
FCA_GND8047885_CACTCCATCGATGAGG	2025	FCA_GND8047885	F81	female	CD45-	0.0236056	4787	0.0540146	0.0404624	1	8.8	N	0	Mesenchymal_GATA2_NR2F1	Mesen_dorsalMesentery
FCA_GND8047885_CAGAATCAGAAGGTGA	2088	FCA_GND8047885	F81	female	CD45-	0.0620117	4096	0.124555	0.0900437	1	8.8	N	1	Supporting	Supp_preGC_IIc
FCA_GND8047885_CAGAATCAGTACCGGA	2174	FCA_GND8047885	F81	female	CD45-	0.0172077	5637	0.104762	0.104762	1	8.8	N	1	Supporting	Supp_preGC_IIa
FCA_GND8047885_CAGAATCAGTACGATA	2554	FCA_GND8047885	F81	female	CD45-	0.00733945	5450	0.204082	0.110867	1	8.8	N	1	Supporting	Supp_preGC_IIa
FCA_GND8047885_CAGAATCCAAATACAG	3500	FCA_GND8047885	F81	female	CD45-	0.0507756	9670	0.0647482	0.0900437	1	8.8	N	1	Supporting	Supp_preGC_IIb
FCA_GND8047885_CAGAATCCAACGATCT	2473	FCA_GND8047885	F81	female	CD45-	0.015618	6723	0.0647482	0.075718	1	8.8	N	1	Supporting	Supp_preGC_IIb
FCA_GND8047885_CAGAATCCAATGGAGC	2626	FCA_GND8047885	F81	female	CD45-	0.0222083	6394	0.110867	0.0718512	1	8.8	N	1	Supporting	Supp_preGC_IIb
FCA_GND8047885_CAGAATCCACGCTTTC	2009	FCA_GND8047885	F81	female	CD45-	0.00726716	5229	0.0526316	0.0614786	1	8.8	N	1	Supporting	Supp_preGC_IIa
FCA_GND8047885_CAGAATCCATCGTCGG	2284	FCA_GND8047885	F81	female	CD45-	0.0391736	6050	0.0614786	0.0876457	1	8.8	N	2	Mesenchymal_LHX9_ARX	Mesen_ovarianStroma
FCA_GND8047885_CAGAATCGTAGCGTAG	1803	FCA_GND8047885	F81	female	CD45-	0.0483554	3557	0.132262	0.0682005	1	8.8	N	1	Supporting	Supp_preGC_IIa
FCA_GND8047885_CAGAATCGTAGGGACT	1773	FCA_GND8047885	F81	female	CD45-	0.0333878	4283	0.07	0.0606932	1	8.8	N	2	Mesenchymal_LHX9_ARX	Mesen_ovarianStroma
FCA_GND8047885_CAGAATCGTAGGGTAC	1986	FCA_GND8047885	F81	female	CD45-	0.0241149	5847	0.0737564	0.07	1	8.8	N	2	Mesenchymal_LHX9_ARX	Mesen_ovarianStroma
FCA_GND8047885_CAGAATCGTAGTAGTA	2509	FCA_GND8047885	F81	female	CD45-	0.0521989	5230	0.149798	0.0777385	1	8.8	N	1	Supporting	Supp_preGC_I
FCA_GND8047885_CAGAATCGTCTTTCAT	2557	FCA_GND8047885	F81	female	CD45-	0.0391236	6390	0.183099	0.075718	1	8.8	N	1	Supporting	Supp_preGC_IIb
FCA_GND8047885_CAGAATCTCCACTGGG	1983	FCA_GND8047885	F81	female	CD45-	0.0219469	5650	0.0512821	0.0554324	1	8.8	N	0	Mesenchymal_GATA2_NR2F1	Mesen_dorsalMesentery
FCA_GND8047885_CAGAATCTCGAGAACG	2596	FCA_GND8047885	F81	female	CD45-	0.00446163	6724	0.0512821	0.0937808	1	8.8	N	1	Supporting	Supp_preGC_IIb
FCA_GND8047885_CAGAGAGAGGCCCTCA	2556	FCA_GND8047885	F81	female	CD45-	0.0230963	7144	0.12093	0.075718	1	8.8	N	0	Mesenchymal_GATA2_NR2F1	Mesenchymal_GATA2_NR2F1
FCA_GND8047885_CAGAGAGAGGGAGTAA	2546	FCA_GND8047885	F81	female	CD45-	0.00908824	6822	0.0226674	0.0415584	1	8.8	N	1	Supporting	Supp_preGC_IIb
FCA_GND8047885_CAGAGAGAGTGAACGC	2180	FCA_GND8047885	F81	female	CD45-	0.00112129	5351	0.0449966	0.0718512	1	8.8	N	1	Supporting	Supp_preGC_IIa
FCA_GND8047885_CAGAGAGAGTGTCTCA	1404	FCA_GND8047885	F81	female	CD45-	0.0593607	2628	0.0888252	0.0599078	1	8.8	N	1	Supporting	Supp_preGC_I
FCA_GND8047885_CAGAGAGCACCATGTA	1931	FCA_GND8047885	F81	female	CD45-	0.0455169	4372	0.458194	0.15983	1	8.8	N	1	Supporting	Supp_sKITLG
FCA_GND8047885_CAGAGAGCACCGAAAG	1853	FCA_GND8047885	F81	female	CD45-	0.0259637	5007	0.0841813	0.0554324	1	8.8	N	0	Mesenchymal_GATA2_NR2F1	Mesen_ovarianStroma
FCA_GND8047885_CAGAGAGGTACAGCAG	2424	FCA_GND8047885	F81	female	CD45-	0.017823	6284	0.104762	0.0718512	1	8.8	N	1	Supporting	Supp_preGC_IIb
FCA_GND8047885_CAGAGAGGTCCTCTTG	3056	FCA_GND8047885	F81	female	CD45-	0.0379747	8295	0.0819672	0.104762	1	8.8	N	1	Supporting	Supp_preGC_IIb
FCA_GND8047885_CAGAGAGGTGATAAAC	3042	FCA_GND8047885	F81	female	CD45-	0.0375677	8305	0.0819672	0.114094	1	8.8	N	1	Supporting	Supp_preGC_IIb
FCA_GND8047885_CAGAGAGTCAACGAAA	2242	FCA_GND8047885	F81	female	CD45-	0.0772505	4699	0.15983	0.12093	1	8.8	N	1	Supporting	Supp_preGC_I
FCA_GND8047885_CAGAGAGTCAGTCAGT	2582	FCA_GND8047885	F81	female	CD45-	0.0413026	6295	0.140645	0.114094	1	8.8	N	1	Supporting	Supp_preGC_IIc
FCA_GND8047885_CAGAGAGTCCGTTGTC	1030	FCA_GND8047885	F81	female	CD45-	0.074564	1663	0.0583776	0.101871	1	8.8	N	1	Supporting	Supp_preGC_I
FCA_GND8047885_CAGAGAGTCTCTAGGA	1177	FCA_GND8047885	F81	female	CD45-	0.0345461	2721	0.0426789	0.07	1	8.8	N	2	Mesenchymal_LHX9_ARX	Mesen_ovarianStroma
FCA_GND8047885_CAGAGAGTCTGCTGCT	2341	FCA_GND8047885	F81	female	CD45-	0.0636402	4714	0.0718512	0.0664506	1	8.8	N	1	Supporting	Supp_sLGR5_female
FCA_GND8047885_CAGATCAAGAGACTAT	1602	FCA_GND8047885	F81	female	CD45-	0.0167612	3878	0.0219436	0.0130112	1	8.8	N	0	Mesenchymal_GATA2_NR2F1	Mesenchymal_GATA2_NR2F1
FCA_GND8047885_CAGATCAAGATAGTCA	2024	FCA_GND8047885	F81	female	CD45-	0.0341902	3890	0.170877	0.0798206	1	8.8	N	1	Supporting	Supp_preGC_I
FCA_GND8047885_CAGATCAAGCACGCCT	2443	FCA_GND8047885	F81	female	CD45-	0.0288645	5751	0.0912621	0.112481	1	8.8	N	1	Supporting	Supp_preGC_I
FCA_GND8047885_CAGATCAAGCGCCTTG	2732	FCA_GND8047885	F81	female	CD45-	0.0209884	6718	0.0864662	0.110867	1	8.8	N	1	Supporting	Supp_preGC_IIb
FCA_GND8047885_CAGATCAAGGCAGTCA	2089	FCA_GND8047885	F81	female	CD45-	0.0403727	4186	0.117446	0.109313	1	8.8	N	1	Supporting	Supp_preGC_I
FCA_GND8047885_CAGATCAAGGCTAGAC	3548	FCA_GND8047885	F81	female	CD45-	0.0533954	9233	0.238462	0.12093	1	8.8	N	1	Supporting	Supp_preGC_I
FCA_GND8047885_CAGATCAAGTAGTGCG	1940	FCA_GND8047885	F81	female	CD45-	0.0719982	4389	0.204082	0.104762	1	8.8	N	1	Supporting	Supp_preGC_I
FCA_GND8047885_CAGATCACACCGATAT	2026	FCA_GND8047885	F81	female	CD45-	0.0266667	4725	0.140645	0.114094	1	8.8	N	1	Supporting	Supp_preGC_IIa
FCA_GND8047885_CAGATCACACCTATCC	2323	FCA_GND8047885	F81	female	CD45-	0.0140795	5611	0.165217	0.109313	1	8.8	N	1	Supporting	Supp_sLGR5_female
FCA_GND8047885_CAGATCACAGTTCCCT	2061	FCA_GND8047885	F81	female	CD45-	0.027361	5665	0.0583776	0.0798206	1	8.8	N	1	Supporting	Supp_preGC_IIa
FCA_GND8047885_CAGATCACATCACAAC	2904	FCA_GND8047885	F81	female	CD45-	0.0143195	7193	0.220217	0.114094	1	8.8	N	1	Supporting	Supp_preGC_IIb
FCA_GND8047885_CAGATCAGTAGCTGCC	1635	FCA_GND8047885	F81	female	CD45-	0.0799868	3038	0.0540146	0.0798206	1	8.8	N	1	Supporting	Supp_preGC_I
FCA_GND8047885_CAGATCAGTGAGCGAT	1617	FCA_GND8047885	F81	female	CD45-	0.0141333	3467	0.0159652	0.0272981	1	8.8	N	0	Mesenchymal_GATA2_NR2F1	Mesenchymal_GATA2_NR2F1
FCA_GND8047885_CAGATCATCCCTGACT	2003	FCA_GND8047885	F81	female	CD45-	0.0221218	4204	0.362398	0.0876457	1	8.8	N	2	Mesenchymal_LHX9_ARX	Mesen_ovarianStroma
FCA_GND8047885_CAGATCATCGAGAGCA	2676	FCA_GND8047885	F81	female	CD45-	0.0312968	6007	0.154696	0.211909	1	8.8	N	1	Supporting	Supp_preGC_I
FCA_GND8047885_CAGATCATCGCCATAA	2247	FCA_GND8047885	F81	female	CD45-	0.0579678	4537	0.117446	0.0554324	1	8.8	N	1	Supporting	Supp_preGC_I
FCA_GND8047885_CAGATCATCGGTGTTA	2211	FCA_GND8047885	F81	female	CD45-	0.0308777	5959	0.0664506	0.0876457	1	8.8	N	2	Mesenchymal_LHX9_ARX	Mesen_ovarianStroma
FCA_GND8047885_CAGATCATCTACGAGT	2817	FCA_GND8047885	F81	female	CD45-	0.00719108	6814	0.0554324	0.07	1	8.8	N	1	Supporting	Supp_preGC_IIb
FCA_GND8047885_CAGATCATCTTTACAC	2482	FCA_GND8047885	F81	female	CD45-	0.0265809	7148	0.107759	0.0718512	1	8.8	N	2	Mesenchymal_LHX9_ARX	Mesen_ovarianStroma
FCA_GND8047885_CAGCAGCAGAATCTCC	2331	FCA_GND8047885	F81	female	CD45-	0.0186999	5615	0.0647482	0.0718512	1	8.8	N	1	Supporting	Supp_preGC_IIb
FCA_GND8047885_CAGCAGCAGACACGAC	1846	FCA_GND8047885	F81	female	CD45-	0.0576627	3902	0.124555	0.147458	1	8.8	N	1	Supporting	Supp_sKITLG
FCA_GND8047885_CAGCAGCAGATGCCTT	3757	FCA_GND8047885	F81	female	CD45-	0.0245669	10909	0.296552	0.211909	1	8.8	N	1	Supporting	Supp_preGC_I
FCA_GND8047885_CAGCAGCAGGATGGTC	2985	FCA_GND8047885	F81	female	CD45-	0.0524211	6753	0.0486787	0.109313	1	8.8	N	1	Supporting	Supp_sLGR5_female
FCA_GND8047885_CAGCAGCAGGCGACAT	2655	FCA_GND8047885	F81	female	CD45-	0.0587509	5668	0.183099	0.104762	1	8.8	N	1	Supporting	Supp_preGC_I
FCA_GND8047885_CAGCAGCAGTCAAGGC	2408	FCA_GND8047885	F81	female	CD45-	0.0105244	5606	0.0363077	0.0410827	1	8.8	N	1	Supporting	Supp_preGC_IIb
FCA_GND8047885_CAGCAGCCACACCGCA	2322	FCA_GND8047885	F81	female	CD45-	0.0107451	5677	0.075718	0.0682005	1	8.8	N	1	Supporting	Supp_preGC_IIa
FCA_GND8047885_CAGCAGCCACATAACC	2104	FCA_GND8047885	F81	female	CD45-	0.0415859	5675	0.034358	0.0606932	1	8.8	N	5	Coel Epi	Supp_ovarianSurf
FCA_GND8047885_CAGCAGCCATCACAAC	2806	FCA_GND8047885	F81	female	CD45-	0.00866373	6810	0.270789	0.211909	1	8.8	N	1	Supporting	Supp_preGC_I
FCA_GND8047885_CAGCAGCCATGCTAGT	2675	FCA_GND8047885	F81	female	CD45-	0.0494074	7003	0.0798206	0.0900437	1	8.8	N	1	Supporting	Supp_preGC_IIb
FCA_GND8047885_CAGCAGCGTGATGCCC	2202	FCA_GND8047885	F81	female	CD45-	0.0235005	5702	0.075718	0.109313	1	8.8	N	1	Supporting	Supp_preGC_IIa
FCA_GND8047885_CAGCAGCGTGCCTTGG	2098	FCA_GND8047885	F81	female	CD45-	0.0371439	5546	0.0718512	0.0647482	1	8.8	N	5	Coel Epi	Supp_coelEpi
FCA_GND8047885_CAGCAGCTCGCGTAGC	1780	FCA_GND8047885	F81	female	CD45-	0.0414774	3303	0.114094	0.0526316	1	8.8	N	1	Supporting	Supp_preGC_I
FCA_GND8047885_CAGCAGCTCGGCGCTA	2808	FCA_GND8047885	F81	female	CD45-	0.0138845	6266	0.0630915	0.0900437	1	8.8	N	1	Supporting	Supp_preGC_IIb
FCA_GND8047885_CAGCATAAGCTGATAA	2099	FCA_GND8047885	F81	female	CD45-	0.0280488	4920	0.0426789	0.075718	1	8.8	N	2	Mesenchymal_LHX9_ARX	Mesen_ovarianStroma
FCA_GND8047885_CAGCATAAGTATCGAA	2134	FCA_GND8047885	F81	female	CD45-	0.0542115	4464	0.196694	0.15983	1	8.8	N	1	Supporting	Supp_preGC_I
FCA_GND8047885_CAGCATACAACTGGCC	2666	FCA_GND8047885	F81	female	CD45-	0.0141672	7835	0.0682005	0.0937808	1	8.8	N	1	Supporting	Supp_preGC_IIb
FCA_GND8047885_CAGCATACAATGGACG	2296	FCA_GND8047885	F81	female	CD45-	0.00618705	6950	0.0334129	0.0787796	1	8.8	N	2	Mesenchymal_LHX9_ARX	Mesen_ovarianStroma
FCA_GND8047885_CAGCATACAATGTAAG	1868	FCA_GND8047885	F81	female	CD45-	0.0316187	4238	0.0334129	0.0334129	1	8.8	N	0	Mesenchymal_GATA2_NR2F1	Mesen_dorsalMesentery
FCA_GND8047885_CAGCATACACGTAAGG	2505	FCA_GND8047885	F81	female	CD45-	0.0296188	6820	0.145119	0.0682005	1	8.8	N	5	Coel Epi	Supp_ovarianSurf
FCA_GND8047885_CAGCATAGTACCGCTG	2923	FCA_GND8047885	F81	female	CD45-	0.0220788	8832	0.0614786	0.075718	1	8.8	N	0	Mesenchymal_GATA2_NR2F1	Mesenchymal_GATA2_NR2F1
FCA_GND8047885_CAGCATAGTCACACGC	1964	FCA_GND8047885	F81	female	CD45-	0.0154335	4406	0.296552	0.110867	1	8.8	N	1	Supporting	Supp_sKITLG
FCA_GND8047885_CAGCATAGTGGCTCCA	2009	FCA_GND8047885	F81	female	CD45-	0.0401656	4830	0.0554324	0.0888252	1	8.8	N	5	Coel Epi	Supp_ovarianSurf
FCA_GND8047885_CAGCATAGTTATCCGA	2696	FCA_GND8047885	F81	female	CD45-	0.0105168	6656	0.176829	0.0718512	1	8.8	N	1	Supporting	Supp_preGC_IIb
FCA_GND8047885_CAGCATAGTTCACGGC	2665	FCA_GND8047885	F81	female	CD45-	0.0354983	6282	0.07	0.109313	1	8.8	N	1	Supporting	Supp_sLGR5_female
FCA_GND8047885_CAGCATAGTTCGTTGA	1135	FCA_GND8047885	F81	female	CD45-	0.0322092	2639	0.0540146	0.075718	1	8.8	N	2	Mesenchymal_LHX9_ARX	Mesen_testisStroma
FCA_GND8047885_CAGCATATCAAGCCTA	1941	FCA_GND8047885	F81	female	CD45-	0.0593053	3541	0.0583776	0.0664506	1	8.8	N	1	Supporting	Supp_sLGR5_female
FCA_GND8047885_CAGCATATCAGCTTAG	2025	FCA_GND8047885	F81	female	CD45-	0.0443884	3965	0.0599078	0.0554324	1	8.8	N	1	Supporting	Supp_preGC_I
FCA_GND8047885_CAGCATATCGCCTGTT	1870	FCA_GND8047885	F81	female	CD45-	0.022789	4783	0.0219436	0.0272981	1	8.8	N	0	Mesenchymal_GATA2_NR2F1	Mesen_dorsalMesentery
FCA_GND8047885_CAGCATATCTCGATGA	2677	FCA_GND8047885	F81	female	CD45-	0.0258095	8524	0.0486787	0.0606932	1	8.8	N	2	Mesenchymal_LHX9_ARX	Mesen_ovarianStroma
FCA_GND8047885_CAGCCGAAGAATTGTG	1835	FCA_GND8047885	F81	female	CD45-	0.0271493	4641	0.0306891	0.0181832	1	8.8	N	0	Mesenchymal_GATA2_NR2F1	Mesen_dorsalMesentery
FCA_GND8047885_CAGCCGAAGACAAAGG	2559	FCA_GND8047885	F81	female	CD45-	0.00422328	5446	0.0682005	0.0808939	1	8.8	N	1	Supporting	Supp_preGC_IIb
FCA_GND8047885_CAGCCGAAGACTCGGA	1676	FCA_GND8047885	F81	female	CD45-	0.0123392	3809	0.0486787	0.0480507	1	8.8	N	1	Supporting	Supp_preGC_IIa
FCA_GND8047885_CAGCCGAAGAGCCTAG	2807	FCA_GND8047885	F81	female	CD45-	0.0327993	6616	0.075718	0.0900437	1	8.8	N	1	Supporting	Supp_preGC_IIb
FCA_GND8047885_CAGCCGAAGGCTCATT	1923	FCA_GND8047885	F81	female	CD45-	0.0259465	3777	0.0864662	0.0888252	1	8.8	N	1	Supporting	Supp_preGC_I
FCA_GND8047885_CAGCCGAAGGTGCAAC	1282	FCA_GND8047885	F81	female	CD45-	0.0258085	3216	0.0568862	0.07	1	8.8	N	0	Mesenchymal_GATA2_NR2F1	Mesen_dorsalMesentery
FCA_GND8047885_CAGCCGAAGTTTAGGA	1974	FCA_GND8047885	F81	female	CD45-	0.0657822	3618	0.0353228	0.0526316	1	8.8	N	1	Supporting	Supp_preGC_I
FCA_GND8047885_CAGCCGACAAGTACCT	2523	FCA_GND8047885	F81	female	CD45-	0.0449234	6589	0.0798206	0.104762	1	8.8	N	1	Supporting	Supp_preGC_I
FCA_GND8047885_CAGCCGACAGTCAGAG	3161	FCA_GND8047885	F81	female	CD45-	0.05509	8114	0.0630915	0.101871	1	8.8	N	1	Supporting	Supp_sLGR5_female
FCA_GND8047885_CAGCCGACATCGGTTA	1987	FCA_GND8047885	F81	female	CD45-	0.0178751	4979	0.104762	0.0777385	1	8.8	N	1	Supporting	Supp_ovarianSurf
FCA_GND8047885_CAGCCGAGTCAGAATA	2471	FCA_GND8047885	F81	female	CD45-	0.0129831	6701	0.124555	0.0614786	1	8.8	N	1	Supporting	Supp_preGC_IIa
FCA_GND8047885_CAGCCGAGTCCAGTAT	2194	FCA_GND8047885	F81	female	CD45-	0.0625147	4255	0.149798	0.0554324	1	8.8	N	1	Supporting	Supp_preGC_I
FCA_GND8047885_CAGCCGAGTGTCAATC	2663	FCA_GND8047885	F81	female	CD45-	0.0567399	6239	0.0461957	0.0554324	1	8.8	N	1	Supporting	Supp_preGC_I
FCA_GND8047885_CAGCCGATCACCCTCA	2217	FCA_GND8047885	F81	female	CD45-	0.027179	5335	0.165217	0.106369	1	8.8	N	1	Supporting	Supp_preGC_IIb
FCA_GND8047885_CAGCCGATCATCGGAT	2169	FCA_GND8047885	F81	female	CD45-	0.0535133	6447	0.0737564	0.0547235	1	8.8	N	2	Mesenchymal_LHX9_ARX	Mesen_ovarianStroma
FCA_GND8047885_CAGCCGATCCACGAAT	1472	FCA_GND8047885	F81	female	CD45-	0.0367188	3840	0.0486787	0.0526316	1	8.8	N	2	Mesenchymal_LHX9_ARX	Mesen_testisStroma
FCA_GND8047885_CAGCCGATCGCCCTTA	2148	FCA_GND8047885	F81	female	CD45-	0.0240323	6200	0.0888252	0.0614786	1	8.8	N	1	Supporting	Supp_preGC_IIa
FCA_GND8047885_CAGCCGATCTGATACG	2425	FCA_GND8047885	F81	female	CD45-	0.0275393	5592	0.22905	0.114094	1	8.8	N	1	Supporting	Supp_preGC_IIa
FCA_GND8047885_CAGCCGATCTTAGCCC	1102	FCA_GND8047885	F81	female	CD45-	0.0208996	2201	0.0147549	0.0130112	1	8.8	N	0	Mesenchymal_GATA2_NR2F1	Mesenchymal_GATA2_NR2F1
FCA_GND8047885_CAGCGACAGAACTGTA	2065	FCA_GND8047885	F81	female	CD45-	0.0166761	5277	0.132262	0.075718	1	8.8	N	2	Mesenchymal_LHX9_ARX	Mesen_ovarianStroma
FCA_GND8047885_CAGCGACAGATGGCGT	2325	FCA_GND8047885	F81	female	CD45-	0.0571598	5056	0.15983	0.140645	1	8.8	N	1	Supporting	Supp_preGC_I
FCA_GND8047885_CAGCGACAGTATGACA	1396	FCA_GND8047885	F81	female	CD45-	0.0318647	2542	0.0324867	0.0664506	1	8.8	N	1	Supporting	Supp_sLGR5_female
FCA_GND8047885_CAGCGACCAAGCTGAG	1926	FCA_GND8047885	F81	female	CD45-	0.0498926	4189	0.0864662	0.110867	1	8.8	N	1	Supporting	Supp_preGC_I
FCA_GND8047885_CAGCGACCACTGAAGG	2082	FCA_GND8047885	F81	female	CD45-	0.0300944	5084	0.0630915	0.0737564	1	8.8	N	0	Mesenchymal_GATA2_NR2F1	Mesen_dorsalMesentery
FCA_GND8047885_CAGCGACGTAGATTAG	1409	FCA_GND8047885	F81	female	CD45-	0.0492143	3373	0.07	0.0547235	1	8.8	N	2	Mesenchymal_LHX9_ARX	Mesen_ovarianStroma
FCA_GND8047885_CAGCGACGTCTCACCT	2488	FCA_GND8047885	F81	female	CD45-	0.0453553	5953	0.211909	0.101871	1	8.8	N	1	Supporting	Supp_preGC_I
FCA_GND8047885_CAGCGACTCAAACGGG	1813	FCA_GND8047885	F81	female	CD45-	0.00941129	4994	0.075718	0.0606932	1	8.8	N	2	Mesenchymal_LHX9_ARX	Mesen_ovarianStroma
FCA_GND8047885_CAGCGACTCAACTCTT	2857	FCA_GND8047885	F81	female	CD45-	0.0233328	6343	0.124555	0.211909	1	8.8	N	1	Supporting	Supp_preGC_I
FCA_GND8047885_CAGCGACTCAGTACGT	2044	FCA_GND8047885	F81	female	CD45-	0.0233757	5433	0.0841813	0.0606932	1	8.8	N	2	Mesenchymal_LHX9_ARX	Mesen_ovarianStroma
FCA_GND8047885_CAGCGACTCCGAGCCA	1928	FCA_GND8047885	F81	female	CD45-	0.0434079	3709	0.0298165	0.0554324	1	8.8	N	1	Supporting	Supp_preGC_I
FCA_GND8047885_CAGCGACTCGCTAGCG	3458	FCA_GND8047885	F81	female	CD45-	0.0508101	9073	0.405405	0.109313	1	8.8	N	1	Supporting	Supp_preGC_I
FCA_GND8047885_CAGCGACTCGTTACAG	1902	FCA_GND8047885	F81	female	CD45-	0.0297086	5251	0.0647482	0.0606932	1	8.8	N	2	Mesenchymal_LHX9_ARX	Mesen_ovarianStroma
FCA_GND8047885_CAGCGACTCTCTGAGA	2469	FCA_GND8047885	F81	female	CD45-	0.00534442	6736	0.0888252	0.0798206	1	8.8	N	1	Supporting	Supp_preGC_IIa
FCA_GND8047885_CAGCTAAAGAAACCAT	2140	FCA_GND8047885	F81	female	CD45-	0.0812928	4084	0.204082	0.0798206	1	8.8	N	1	Supporting	Supp_preGC_I
FCA_GND8047885_CAGCTAAAGAATTCCC	2721	FCA_GND8047885	F81	female	CD45-	0.0296069	7836	0.196694	0.0937808	1	8.8	N	1	Supporting	Supp_preGC_IIb
FCA_GND8047885_CAGCTAAAGCTAACAA	1701	FCA_GND8047885	F81	female	CD45-	0.0310287	2965	0.128329	0.0977331	1	8.8	N	1	Supporting	Supp_sLGR5_female
FCA_GND8047885_CAGCTAAAGTGACATA	2044	FCA_GND8047885	F81	female	CD45-	0.0428189	5605	0.0777385	0.109313	1	8.8	N	2	Mesenchymal_LHX9_ARX	Mesen_ovarianStroma
FCA_GND8047885_CAGCTAACACGAGAGT	3337	FCA_GND8047885	F81	female	CD45-	0.0503589	9194	0.183099	0.11577	1	8.8	N	1	Supporting	Supp_preGC_I
FCA_GND8047885_CAGCTAACAGTATGCT	2670	FCA_GND8047885	F81	female	CD45-	0.0235012	8340	0.107759	0.075718	1	8.8	N	0	Mesenchymal_GATA2_NR2F1	Mesenchymal_GATA2_NR2F1
FCA_GND8047885_CAGCTAACATCCCACT	2087	FCA_GND8047885	F81	female	CD45-	0.035905	5431	0.107759	0.109313	1	8.8	N	2	Mesenchymal_LHX9_ARX	Mesen_ovarianStroma
FCA_GND8047885_CAGCTAACATCTCGCT	2504	FCA_GND8047885	F81	female	CD45-	0.0353812	6218	0.405405	0.0718512	1	8.8	N	1	Supporting	Supp_preGC_IIb
FCA_GND8047885_CAGCTAACATTCCTCG	2381	FCA_GND8047885	F81	female	CD45-	0.0273748	7306	0.136364	0.0718512	1	8.8	N	2	Mesenchymal_LHX9_ARX	Mesen_ovarianStroma
FCA_GND8047885_CAGCTAAGTACCAGTT	1980	FCA_GND8047885	F81	female	CD45-	0.0612445	4082	0.0718512	0.0554324	1	8.8	N	1	Supporting	Supp_preGC_I
FCA_GND8047885_CAGCTAAGTCTCCACT	2168	FCA_GND8047885	F81	female	CD45-	0.0389933	6437	0.110867	0.0614786	1	8.8	N	2	Mesenchymal_LHX9_ARX	Mesen_ovarianStroma
FCA_GND8047885_CAGCTAAGTGCCTGTG	2500	FCA_GND8047885	F81	female	CD45-	0.00566761	5999	0.0241546	0.0410827	1	8.8	N	1	Supporting	Supp_preGC_IIb
FCA_GND8047885_CAGCTAAGTGGCGAAT	2787	FCA_GND8047885	F81	female	CD45-	0.058999	6034	0.0363077	0.109313	1	8.8	N	1	Supporting	Supp_sLGR5_female
FCA_GND8047885_CAGCTAATCAGCATGT	2295	FCA_GND8047885	F81	female	CD45-	0.0432623	4831	0.238462	0.109313	1	8.8	N	1	Supporting	Supp_preGC_I
FCA_GND8047885_CAGCTAATCCTGCTTG	2594	FCA_GND8047885	F81	female	CD45-	0.0771149	5213	0.165217	0.109313	1	8.8	N	1	Supporting	Supp_preGC_I
FCA_GND8047885_CAGCTAATCGAGAGCA	1657	FCA_GND8047885	F81	female	CD45-	0.0346251	4361	0.0404624	0.0334129	1	8.8	N	0	Mesenchymal_GATA2_NR2F1	Mesen_dorsalMesentery
FCA_GND8047885_CAGCTGGAGCGTTGCC	2009	FCA_GND8047885	F81	female	CD45-	0.0442023	4864	0.0819672	0.0819672	1	8.8	N	9	PV	PV
FCA_GND8047885_CAGCTGGAGGATCGCA	2624	FCA_GND8047885	F81	female	CD45-	0.0310549	6247	0.204082	0.104762	1	8.8	N	1	Supporting	Supp_preGC_I
FCA_GND8047885_CAGCTGGAGGCACATG	2757	FCA_GND8047885	F81	female	CD45-	0.0615563	6027	0.0990807	0.112481	1	8.8	N	1	Supporting	Supp_sLGR5_female
FCA_GND8047885_CAGCTGGAGTACGATA	2496	FCA_GND8047885	F81	female	CD45-	0.0331138	5466	0.220217	0.0798206	1	8.8	N	1	Supporting	Supp_sKITLG
FCA_GND8047885_CAGCTGGAGTCTCGGC	1842	FCA_GND8047885	F81	female	CD45-	0.0135166	4365	0.0841813	0.109313	1	8.8	N	1	Supporting	Supp_preGC_IIb
FCA_GND8047885_CAGCTGGAGTTACCCA	1963	FCA_GND8047885	F81	female	CD45-	0.0344697	5280	0.0630915	0.0718512	1	8.8	N	2	Mesenchymal_LHX9_ARX	Mesen_ovarianStroma
FCA_GND8047885_CAGCTGGCAGGTCGTC	1533	FCA_GND8047885	F81	female	CD45-	0.016697	3294	0.0298165	0.0404624	1	8.8	N	0	Mesenchymal_GATA2_NR2F1	Mesen_dorsalMesentery
FCA_GND8047885_CAGCTGGGTAAAGGAG	2514	FCA_GND8047885	F81	female	CD45-	0.0354134	7003	0.0937808	0.0963855	1	8.8	N	1	Supporting	Supp_preGC_IIa
FCA_GND8047885_CAGCTGGGTAATCGTC	2064	FCA_GND8047885	F81	female	CD45-	0.0535313	5791	0.0599078	0.0614786	1	8.8	N	9	PV	PV
FCA_GND8047885_CAGCTGGGTACCGAGA	2578	FCA_GND8047885	F81	female	CD45-	0.0549719	5330	0.0737564	0.126442	1	8.8	N	1	Supporting	Supp_preGC_I
FCA_GND8047885_CAGCTGGGTGAAAGAG	2211	FCA_GND8047885	F81	female	CD45-	0.0595583	4483	0.0438247	0.0841813	1	8.8	N	1	Supporting	Supp_preGC_I
FCA_GND8047885_CAGCTGGTCAATACCG	1717	FCA_GND8047885	F81	female	CD45-	0.0292695	3929	0.0888252	0.0718512	1	8.8	N	2	Mesenchymal_LHX9_ARX	Mesen_ovarianStroma
FCA_GND8047885_CAGCTGGTCAGATAAG	2752	FCA_GND8047885	F81	female	CD45-	0.0500086	5799	0.0614786	0.0900437	1	8.8	N	1	Supporting	Supp_preGC_I
FCA_GND8047885_CAGCTGGTCTAACTTC	1910	FCA_GND8047885	F81	female	CD45-	0.0229232	4755	0.0540146	0.0554324	1	8.8	N	2	Mesenchymal_LHX9_ARX	Mesen_dorsalMesentery
FCA_GND8047885_CAGCTGGTCTAAGCCA	3195	FCA_GND8047885	F81	female	CD45-	0.0353264	8011	0.0682005	0.114094	1	8.8	N	1	Supporting	Supp_preGC_IIb
FCA_GND8047885_CAGCTGGTCTGGTTCC	1575	FCA_GND8047885	F81	female	CD45-	0.0466424	3023	0.124555	0.128329	1	8.8	N	5	Coel Epi	Supp_ovarianSurf
FCA_GND8047885_CAGGTGCAGACACGAC	2117	FCA_GND8047885	F81	female	CD45-	0.0340102	6057	0.0777385	0.117446	1	8.8	N	2	Mesenchymal_LHX9_ARX	Mesen_testisStroma
FCA_GND8047885_CAGGTGCAGAGCAATT	2413	FCA_GND8047885	F81	female	CD45-	0.0537505	4986	0.0798206	0.104762	1	8.8	N	1	Supporting	Supp_preGC_IIb
FCA_GND8047885_CAGGTGCAGATAGGAG	3281	FCA_GND8047885	F81	female	CD45-	0.0120564	8792	0.136364	0.114094	1	8.8	N	1	Supporting	Supp_preGC_IIb
FCA_GND8047885_CAGGTGCAGCCAGTTT	2283	FCA_GND8047885	F81	female	CD45-	0.00917737	5993	0.0512821	0.0415584	1	8.8	N	1	Supporting	Supp_preGC_IIa
FCA_GND8047885_CAGGTGCAGCTTATCG	3147	FCA_GND8047885	F81	female	CD45-	0.0348017	8649	0.170877	0.104762	1	8.8	N	1	Supporting	Supp_preGC_IIb
FCA_GND8047885_CAGGTGCAGTAACCCT	2572	FCA_GND8047885	F81	female	CD45-	0.0313386	6701	0.0864662	0.0888252	1	8.8	N	5	Coel Epi	Supp_ovarianSurf
FCA_GND8047885_CAGGTGCAGTACACCT	2412	FCA_GND8047885	F81	female	CD45-	0.0320691	6829	0.0630915	0.0614786	1	8.8	N	9	PV	PV
FCA_GND8047885_CAGGTGCAGTGGTAAT	1895	FCA_GND8047885	F81	female	CD45-	0.0361572	4757	0.0630915	0.0664506	1	8.8	N	2	Mesenchymal_LHX9_ARX	Mesen_ovarianStroma
FCA_GND8047885_CAGGTGCAGTGTCCAT	2589	FCA_GND8047885	F81	female	CD45-	0.0480481	4995	0.140645	0.104762	1	8.8	N	1	Supporting	Supp_preGC_I
FCA_GND8047885_CAGGTGCCAATCACAC	2102	FCA_GND8047885	F81	female	CD45-	0.0249239	5256	0.0841813	0.0606932	1	8.8	N	2	Mesenchymal_LHX9_ARX	Mesen_ovarianStroma
FCA_GND8047885_CAGGTGCGTATAAACG	1933	FCA_GND8047885	F81	female	CD45-	0.0253765	4847	0.0888252	0.075718	1	8.8	N	2	Mesenchymal_LHX9_ARX	Mesen_ovarianStroma
FCA_GND8047885_CAGGTGCGTATATGAG	2209	FCA_GND8047885	F81	female	CD45-	0.0527985	5360	0.0937808	0.114094	1	8.8	N	1	Supporting	Supp_sKITLG
FCA_GND8047885_CAGGTGCGTCTCTTTA	1677	FCA_GND8047885	F81	female	CD45-	0.0254062	3385	0.15983	0.0614786	1	8.8	N	1	Supporting	Supp_sKITLG
FCA_GND8047885_CAGGTGCGTCTGCCAG	2453	FCA_GND8047885	F81	female	CD45-	0.0117334	6392	0.165217	0.104762	1	8.8	N	1	Supporting	Supp_preGC_I
FCA_GND8047885_CAGGTGCGTGCAGACA	4896	FCA_GND8047885	F81	female	CD45-	0.0446619	17375	0.61039	0.0912621	1	8.8	N	9	PV	PV
FCA_GND8047885_CAGGTGCGTTATCACG	2189	FCA_GND8047885	F81	female	CD45-	0.0425126	5763	0.0864662	0.0606932	1	8.8	N	2	Mesenchymal_LHX9_ARX	Mesen_ovarianStroma
FCA_GND8047885_CAGGTGCGTTATGCGT	2018	FCA_GND8047885	F81	female	CD45-	0.0044603	5605	0.0664506	0.0777385	1	8.8	N	5	Coel Epi	Supp_ovarianSurf
FCA_GND8047885_CAGGTGCTCAACTCTT	1400	FCA_GND8047885	F81	female	CD45-	0.0398156	2386	0.107759	0.0664506	1	8.8	N	1	Supporting	Supp_sLGR5_female
FCA_GND8047885_CAGGTGCTCAGCACAT	2031	FCA_GND8047885	F81	female	CD45-	0.0346719	5105	0.0737564	0.0798206	1	8.8	N	1	Supporting	Supp_preGC_IIa
FCA_GND8047885_CAGGTGCTCATAACCG	3722	FCA_GND8047885	F81	female	CD45-	0.0229563	9627	0.0718512	0.114094	1	8.8	N	1	Supporting	Supp_preGC_IIb
FCA_GND8047885_CAGGTGCTCCTAAGTG	2795	FCA_GND8047885	F81	female	CD45-	0.0322294	7881	0.0819672	0.109313	1	8.8	N	1	Supporting	Supp_preGC_IIa
FCA_GND8047885_CAGGTGCTCGCCTGAG	1965	FCA_GND8047885	F81	female	CD45-	0.0455543	3644	0.0486787	0.0554324	1	8.8	N	1	Supporting	Supp_preGC_I
[truncated: 198,000+ more rows]

## Sheet: 3_cellranger10x_ATAC_library_st
sample	number of cells	Median fragments per cell	Fraction of fragments overlapping any targeted region
FCA_GND8046539	8668	29255	0.743
HD_F_GON9479873	8901	9515	0.807
HD_F_GON9479874	12913	7491	0.804
HD_F_GON9479871	10160	8630	0.807
HD_F_GON9479872	5335	18171	0.775
FCA_GND8768485	4878	8946	0.823
HD_F_GON9479875	8394	11468	0.801
FCA_GND8795927	8513	10400	0.723
FCA_GND9332157	5427	13647	0.728
FCA_GND8795928	4628	19074	0.747
FCA_GND8768484	3458	16354	0.774
HD_F_GON9883959	5326	20827	0.801
HD_F_GON9525612	1461	45621	-
HD_F_GON9525611	1415	46583	-
FCA_GND8768482	2872	15478	0.72
HD_F_GON9883960	4974	22640	0.802
FCA_GND8768481	1111	34264	0.684
FCA_GND8768483	1172	33301	0.739
HD_F_GON9525614			-
FCA_GND8768487	719	21599	0.618
HD_F_GON9525613	2114	19926	-
