# Supplementary material for: Single-cell roadmap of human gonadal development
Source: Research Square preprint supplement (doi:10.21203/rs.3.rs-496470/v1), 2021-05-21
Supplement: Supplementary file 7 [file 87105e19f887c75e256be4df.xlsx]

## Sheet: 1_DEGs_supporting
p_val	avg_log2FC	pct.1	pct.2	p_val_adj	cluster	gene
0	1.89819	0.726	0.091	0	coelEpi	GPC3
0	1.89589	0.426	0.016	0	coelEpi	SULT1E1
0	1.88627	0.742	0.212	0	coelEpi	MGP
0	1.82836	0.934	0.342	0	coelEpi	COL1A1
0	1.72594	0.488	0.032	0	coelEpi	TM4SF1
0	1.66588	0.865	0.101	0	coelEpi	UPK3B
0	1.61458	0.863	0.293	0	coelEpi	DCN
0	1.3826	0.838	0.194	0	coelEpi	COL9A3
0	1.37654	0.469	0.024	0	coelEpi	RARRES1
0	1.35064	0.734	0.07	0	coelEpi	KLK11
0	1.34264	0.582	0.045	0	coelEpi	POSTN
0	1.27255	0.556	0.072	0	coelEpi	MSLN
0	1.23683	0.688	0.058	0	coelEpi	TNNT1
0	1.20004	0.86	0.281	0	coelEpi	TPM2
0	1.14434	0.894	0.266	0	coelEpi	KRT19
0	1.13675	0.367	0.012	0	coelEpi	OGN
0	1.04174	0.686	0.129	0	coelEpi	PCOLCE
0	0.985961	0.902	0.555	0	coelEpi	TMEM98
0	0.957914	0.979	0.868	0	coelEpi	SPARC
0	0.944667	0.543	0.065	0	coelEpi	SBSPON
0	0.846698	0.579	0.066	0	coelEpi	ETS2
0	0.817293	0.603	0.095	0	coelEpi	RAMP2
0	0.703095	0.503	0.033	0	coelEpi	EPS8L1
0	-1.30491	0.073	0.671	0	coelEpi	REEP6
0	-1.58516	0.148	0.77	0	coelEpi	GATM
0	-2.22352	0.218	0.892	0	coelEpi	RNASE1
9.01977e-315	-1.51615	0.062	0.644	2.54628e-310	coelEpi	MIR202HG
3.97032e-313	1.42403	0.485	0.054	1.12082e-308	coelEpi	TFPI2
4.30534e-300	0.79157	0.372	0.017	1.2154e-295	coelEpi	ELN
1.94824e-299	0.949883	0.635	0.109	5.49987e-295	coelEpi	PODXL
6.56806e-298	0.773419	0.483	0.054	1.85416e-293	coelEpi	LGALS2
1.62072e-282	-1.33701	0.232	0.728	4.57529e-278	coelEpi	CKB
1.21755e-281	0.729649	0.53	0.069	3.43714e-277	coelEpi	LRRN4
2.57174e-281	0.637737	0.449	0.031	7.26002e-277	coelEpi	TMEM151A
8.0714e-279	0.816648	0.533	0.077	2.27856e-274	coelEpi	MMP23B
2.66396e-278	0.863924	0.503	0.061	7.52036e-274	coelEpi	EFNB2
8.60722e-278	1.10204	0.704	0.164	2.42982e-273	coelEpi	ANXA2
1.89548e-275	-1.14859	0.159	0.674	5.35093e-271	coelEpi	PRKAR2B
5.70892e-273	0.90189	0.852	0.433	1.61163e-268	coelEpi	SERPING1
5.88342e-272	0.655557	0.393	0.025	1.66089e-267	coelEpi	RERG
7.61566e-263	1.09065	0.572	0.147	2.1499e-258	coelEpi	CCDC80
1.8953e-262	0.983259	0.799	0.331	5.35044e-258	coelEpi	TPM1
2.67876e-262	0.919449	0.785	0.356	7.56215e-258	coelEpi	PMP22
2.54459e-261	0.847564	0.631	0.187	7.18337e-257	coelEpi	CYTL1
8.39822e-261	0.491501	0.999	0.991	2.37082e-256	coelEpi	RPL5
2.03299e-251	0.85808	0.99	0.918	5.73912e-247	coelEpi	IFITM3
1.05912e-249	0.649568	0.349	0.023	2.98989e-245	coelEpi	SEMA3D
3.6422e-245	0.839972	0.57	0.101	1.02819e-240	coelEpi	NPW
1.1361e-238	-0.979729	0.039	0.511	3.2072e-234	coelEpi	WNT6
2.01111e-238	0.49457	0.999	0.994	5.67737e-234	coelEpi	ACTG1
6.26501e-233	0.674571	0.517	0.109	1.76861e-228	coelEpi	STK26
3.34654e-232	0.813107	0.932	0.562	9.44728e-228	coelEpi	MFAP2
3.48682e-231	1.08044	0.9	0.631	9.84328e-227	coelEpi	COL3A1
7.06236e-225	-1.29396	0.069	0.544	1.99371e-220	coelEpi	STAR
5.55493e-224	0.701822	0.646	0.181	1.56816e-219	coelEpi	CDC42EP1
2.20088e-219	0.738272	0.689	0.26	6.2131e-215	coelEpi	REC8
7.12298e-219	-0.958445	0.319	0.735	2.01082e-214	coelEpi	CTNNAL1
7.73064e-219	-0.863658	0.066	0.524	2.18236e-214	coelEpi	WIPF3
7.45122e-217	0.682042	0.587	0.144	2.10348e-212	coelEpi	LITAF
1.21498e-214	0.468002	0.993	0.984	3.42989e-210	coelEpi	RPL6
2.89326e-214	0.402761	0.259	0.007	8.16767e-210	coelEpi	KLK5
4.25789e-211	0.438766	0.29	0.012	1.202e-206	coelEpi	PKHD1L1
1.70254e-209	0.383167	0.998	0.994	4.80627e-205	coelEpi	RPS27A
8.13274e-208	1.02364	0.775	0.362	2.29587e-203	coelEpi	IGFBP7
2.00874e-207	0.378063	0.999	1	5.67069e-203	coelEpi	EEF1A1
4.70267e-207	0.792637	0.755	0.296	1.32756e-202	coelEpi	ALDH1A2
2.61699e-205	0.638828	0.463	0.07	7.38776e-201	coelEpi	FXYD1
6.09259e-204	0.489321	0.993	0.969	1.71994e-199	coelEpi	RPL10A
8.55307e-202	0.69852	0.495	0.113	2.41453e-197	coelEpi	PLS3
1.39775e-200	-0.795268	0.244	0.703	3.94584e-196	coelEpi	GATA4
5.76194e-199	0.712192	0.394	0.051	1.6266e-194	coelEpi	CLDN15
2.83748e-198	0.674288	0.674	0.243	8.0102e-194	coelEpi	SLC9A3R1
1.52423e-195	0.425049	0.998	0.993	4.30289e-191	coelEpi	RPS12
3.84113e-192	0.587201	0.55	0.133	1.08435e-187	coelEpi	TSPAN4
3.85522e-192	0.718756	0.752	0.358	1.08833e-187	coelEpi	CSRP1
1.25669e-191	0.698106	0.48	0.109	3.54764e-187	coelEpi	CAVIN1
1.84546e-189	0.496768	0.345	0.03	5.20974e-185	coelEpi	CD248
2.14364e-189	0.578446	0.308	0.025	6.05148e-185	coelEpi	PLAC9
1.03851e-188	0.703118	0.891	0.638	2.93171e-184	coelEpi	CD151
1.46487e-186	0.618059	0.466	0.11	4.13533e-182	coelEpi	TRNP1
1.50264e-186	0.416378	0.999	0.993	4.24195e-182	coelEpi	RPL34
2.75782e-184	0.354557	0.179	0.002	7.78534e-180	coelEpi	GJB2
2.83385e-183	0.851911	0.882	0.693	7.99996e-179	coelEpi	MEST
4.14332e-183	0.235987	0.173	0.001	1.16966e-178	coelEpi	PLEKHN1
6.25993e-181	0.471906	0.234	0.008	1.76718e-176	coelEpi	RSPO3
1.39331e-180	0.708989	0.478	0.123	3.9333e-176	coelEpi	GNG11
5.66369e-180	0.32806	0.202	0.004	1.59886e-175	coelEpi	SCTR
5.81719e-179	0.559709	0.355	0.037	1.64219e-174	coelEpi	SLC6A13
6.49543e-179	-0.856699	0.114	0.527	1.83366e-174	coelEpi	KCTD12
7.70696e-179	0.409746	0.291	0.022	2.17567e-174	coelEpi	CAPN6
9.39667e-179	0.757002	0.609	0.18	2.65268e-174	coelEpi	MFAP4
3.06819e-178	0.372289	0.999	0.997	8.66149e-174	coelEpi	RPS8
2.03264e-177	-0.857361	0.06	0.473	5.73814e-173	coelEpi	PLA2G16
3.64305e-177	-1.11832	0.161	0.577	1.02843e-172	coelEpi	GADD45G
3.44386e-176	0.797901	0.799	0.454	9.72202e-172	coelEpi	CPE
8.89684e-175	-1.33046	0.037	0.423	2.51158e-170	coelEpi	MT3
2.23143e-174	-0.862841	0.042	0.43	6.29934e-170	coelEpi	AC022075.1
7.28773e-173	0.344663	0.238	0.011	2.05733e-168	coelEpi	TMEM235
7.77786e-173	0.324225	0.223	0.008	2.19569e-168	coelEpi	ENTPD2
1.01551e-172	0.972835	0.522	0.16	2.86677e-168	coelEpi	ID1
1.23141e-172	-0.759595	0.289	0.68	3.47626e-168	coelEpi	TCEA3
1.56056e-172	0.549482	0.407	0.063	4.40546e-168	coelEpi	FLNC
9.27167e-172	0.471047	0.386	0.058	2.61739e-167	coelEpi	TNFAIP8
1.41036e-169	0.455973	0.998	0.991	3.98145e-165	coelEpi	TPT1
1.08989e-168	-0.730879	0.881	0.961	3.07677e-164	coelEpi	MARCKSL1
1.36374e-167	-1.21506	0.105	0.482	3.84984e-163	coelEpi	CRYM
2.07505e-166	0.724427	0.823	0.507	5.85786e-162	coelEpi	EZR
1.77202e-165	0.504085	0.383	0.065	5.00242e-161	coelEpi	BNC1
3.51158e-165	0.355309	0.199	0.005	9.91318e-161	coelEpi	GATA2
8.13258e-165	0.66945	0.576	0.164	2.29583e-160	coelEpi	LY6H
9.90756e-165	0.416235	0.25	0.016	2.7969e-160	coelEpi	TMEM88
1.43459e-163	0.202168	0.16	0.001	4.04985e-159	coelEpi	KLK8
1.67831e-163	0.390707	0.202	0.006	4.73787e-159	coelEpi	PTGER3
9.01465e-163	-0.812983	0.605	0.84	2.54484e-158	coelEpi	DDX24
1.46247e-162	0.36769	0.996	0.99	4.12856e-158	coelEpi	RPS14
6.7125e-161	0.345408	1	0.995	1.89494e-156	coelEpi	RPL11
6.96133e-161	0.290811	0.176	0.002	1.96518e-156	coelEpi	GPNMB
4.87288e-159	1.1501	0.72	0.358	1.37561e-154	coelEpi	CYR61
8.41885e-159	-1.11244	0.727	0.882	2.37664e-154	coelEpi	BEX1
1.40766e-157	0.636995	0.565	0.176	3.97381e-153	coelEpi	CDH11
1.29506e-156	0.285757	0.151	0.001	3.65596e-152	coelEpi	SERPINE3
3.64783e-156	0.596239	0.472	0.133	1.02978e-151	coelEpi	TPBG
7.15023e-156	-0.772667	0.066	0.425	2.01851e-151	coelEpi	PNCK
3.85216e-155	0.653647	0.95	0.643	1.08746e-150	coelEpi	MDK
1.80485e-153	-1.15998	0.05	0.422	5.0951e-149	coelEpi	INHA
1.00037e-152	-0.708181	0.217	0.598	2.82405e-148	coelEpi	CHCHD10
7.34058e-151	0.34648	0.995	0.993	2.07225e-146	coelEpi	RPS3A
1.25881e-147	0.349457	0.998	0.997	3.55363e-143	coelEpi	RPL10
1.31087e-147	0.315438	0.997	0.995	3.7006e-143	coelEpi	RPS3
4.54746e-147	-0.729541	0.19	0.549	1.28375e-142	coelEpi	IFI27L1
7.38704e-147	0.654906	0.539	0.194	2.08536e-142	coelEpi	ALCAM
8.41508e-147	0.644703	0.593	0.215	2.37558e-142	coelEpi	SPATS2L
1.6602e-146	0.346581	0.999	0.991	4.68675e-142	coelEpi	RPLP0
4.96928e-146	0.670185	0.343	0.063	1.40283e-141	coelEpi	GFRA1
1.37124e-145	0.347244	0.252	0.017	3.87102e-141	coelEpi	AC109466.1
2.6176e-145	0.417881	0.988	0.965	7.3895e-141	coelEpi	NPM1
5.98124e-145	0.434001	0.319	0.047	1.6885e-140	coelEpi	BICDL1
6.08927e-145	0.58095	0.556	0.214	1.719e-140	coelEpi	AATF
1.52221e-144	-0.964039	0.635	0.825	4.29721e-140	coelEpi	COPE
6.0004e-144	-0.74161	0.056	0.4	1.69391e-139	coelEpi	TOX3
2.01331e-143	0.330563	0.998	0.995	5.68358e-139	coelEpi	RPS23
1.34484e-142	0.802718	0.293	0.028	3.79647e-138	coelEpi	CRABP1
3.10277e-141	0.692129	0.893	0.693	8.75913e-137	coelEpi	IFITM2
3.98916e-140	-0.853275	0.545	0.768	1.12614e-135	coelEpi	TXNDC17
2.78765e-139	0.623746	0.894	0.682	7.86953e-135	coelEpi	BCAM
4.71469e-139	0.601164	0.922	0.619	1.33096e-134	coelEpi	MYL9
6.25851e-139	0.370659	0.993	0.982	1.76678e-134	coelEpi	RACK1
3.88926e-138	0.53299	0.928	0.795	1.09794e-133	coelEpi	ZFAS1
6.06835e-138	0.580711	0.421	0.085	1.7131e-133	coelEpi	OLFML3
2.34568e-136	-0.687098	0.586	0.828	6.62184e-132	coelEpi	CSTB
3.27784e-136	0.460535	0.208	0.009	9.25333e-132	coelEpi	COL8A1
1.35347e-135	0.571045	0.464	0.137	3.82084e-131	coelEpi	PRRX1
8.51254e-135	-0.79575	0.533	0.766	2.40309e-130	coelEpi	RBBP7
7.06474e-134	0.530841	0.447	0.134	1.99438e-129	coelEpi	PLPP1
2.63014e-133	0.354687	0.994	0.977	7.4249e-129	coelEpi	RPS5
3.26492e-133	0.562828	0.677	0.345	9.21687e-129	coelEpi	EFEMP2
5.56025e-133	0.326863	0.999	0.992	1.56966e-128	coelEpi	RPS24
4.93334e-131	0.425968	0.364	0.063	1.39268e-126	coelEpi	ASPHD1
9.43887e-131	0.652882	0.666	0.326	2.66459e-126	coelEpi	COL6A2
1.97117e-130	0.40115	0.332	0.048	5.56461e-126	coelEpi	EMILIN1
2.99628e-130	0.370593	0.998	0.986	8.45851e-126	coelEpi	RPL12
9.9895e-130	0.414423	0.307	0.034	2.82004e-125	coelEpi	KLK10
8.67063e-129	0.495554	0.391	0.088	2.44772e-124	coelEpi	LURAP1L
8.70244e-129	0.442236	0.972	0.934	2.4567e-124	coelEpi	CIRBP
9.04099e-128	0.577094	0.535	0.204	2.55227e-123	coelEpi	SELENBP1
2.06713e-127	0.393337	0.25	0.018	5.8355e-123	coelEpi	NR2F1
8.03161e-127	0.316178	0.999	0.99	2.26732e-122	coelEpi	PTMA
8.58991e-127	0.383592	0.295	0.039	2.42493e-122	coelEpi	APLP1
5.12434e-126	0.613525	0.777	0.531	1.4466e-121	coelEpi	LDOC1
1.62604e-125	0.564494	0.637	0.274	4.59031e-121	coelEpi	MEIS2
3.66801e-125	-0.689129	0.229	0.573	1.03548e-120	coelEpi	PEG3
9.1062e-125	0.38425	0.302	0.048	2.57068e-120	coelEpi	OLFML1
1.70388e-124	0.554019	0.326	0.064	4.81006e-120	coelEpi	ANXA3
2.22223e-124	0.509362	0.537	0.183	6.27335e-120	coelEpi	PDPN
2.90552e-124	0.501238	0.235	0.027	8.20228e-120	coelEpi	IGF1
5.28328e-123	0.56349	0.612	0.261	1.49147e-118	coelEpi	MYRF
1.28843e-122	0.284205	0.186	0.01	3.63724e-118	coelEpi	LINC01139
6.00046e-122	0.422172	0.213	0.022	1.69393e-117	coelEpi	BCHE
2.13385e-121	0.309251	0.196	0.012	6.02387e-117	coelEpi	AC245041.2
6.82195e-121	-0.661997	0.061	0.367	1.92584e-116	coelEpi	CCDC73
1.02351e-120	0.51853	0.741	0.429	2.88936e-116	coelEpi	RAB34
2.83585e-120	-0.664745	0.068	0.374	8.00559e-116	coelEpi	KITLG
2.51107e-119	-0.679711	0.674	0.839	7.08875e-115	coelEpi	PKM
4.01715e-119	-0.648806	0.094	0.411	1.13404e-114	coelEpi	ACSM3
2.03776e-118	-0.649205	0.264	0.565	5.75259e-114	coelEpi	VAT1
2.55633e-118	-0.851806	0.42	0.707	7.21651e-114	coelEpi	SAT1
2.5602e-118	0.345765	0.285	0.043	7.22745e-114	coelEpi	RAB33A
5.08884e-118	0.727837	0.527	0.26	1.43658e-113	coelEpi	C2orf40
7.55929e-118	0.502614	0.496	0.173	2.13399e-113	coelEpi	LINC02381
9.49954e-118	-0.647015	0.637	0.828	2.68172e-113	coelEpi	NDFIP1
2.76788e-117	0.573845	0.69	0.303	7.81371e-113	coelEpi	CRIP2
3.29935e-117	-0.574907	0.14	0.466	9.31408e-113	coelEpi	ETNK2
3.98981e-117	-0.635798	0.313	0.628	1.12632e-112	coelEpi	FDXR
1.09172e-116	0.319445	0.996	0.982	3.08193e-112	coelEpi	NACA
2.22061e-116	0.313186	0.999	0.991	6.26877e-112	coelEpi	RPS7
5.58372e-116	-1.86578	0.067	0.363	1.57628e-111	coelEpi	GSTA1
2.1823e-114	-0.789487	0.677	0.838	6.16065e-110	coelEpi	C4orf48
2.31919e-114	0.532183	0.482	0.177	6.54707e-110	coelEpi	AEBP1
8.12666e-114	-0.592402	0.07	0.384	2.29416e-109	coelEpi	MGARP
1.171e-113	0.517316	0.507	0.193	3.30573e-109	coelEpi	LTBP4
1.18073e-113	0.539025	0.406	0.098	3.33319e-109	coelEpi	NRP2
4.02334e-113	-0.583604	0.993	0.992	1.13579e-108	coelEpi	TMSB10
1.9251e-112	0.605256	0.264	0.049	5.43456e-108	coelEpi	ANXA1
2.58242e-112	0.146093	0.112	0.001	7.29016e-108	coelEpi	CLPSL1
1.93991e-111	0.34069	0.295	0.034	5.47637e-107	coelEpi	SERTAD4-AS1
3.50357e-111	0.544546	0.679	0.401	9.89058e-107	coelEpi	HCFC1R1
7.58379e-111	-0.727133	0.023	0.291	2.1409e-106	coelEpi	FOXL2
8.66034e-111	-0.597955	0.22	0.542	2.44481e-106	coelEpi	MSI2
1.12385e-110	-0.785124	0.202	0.509	3.17264e-106	coelEpi	SERPINE2
6.07526e-110	0.290785	0.997	0.993	1.71505e-105	coelEpi	RPL30
7.62415e-110	0.284181	0.227	0.023	2.1523e-105	coelEpi	MMEL1
1.18159e-108	-0.687732	0.463	0.724	3.33562e-104	coelEpi	SERINC5
1.89867e-108	0.300939	0.255	0.037	5.35993e-104	coelEpi	GALNT9
2.19684e-108	0.178234	0.125	0.002	6.20167e-104	coelEpi	SLC10A4
3.32067e-108	0.305685	0.998	0.993	9.37426e-104	coelEpi	RPS4X
3.41312e-108	0.251992	0.2	0.016	9.63523e-104	coelEpi	ADAM33
7.56517e-108	-0.62979	0.371	0.656	2.13565e-103	coelEpi	FBXO21
9.53647e-108	0.300906	0.992	0.98	2.69214e-103	coelEpi	RPL24
2.99248e-107	0.541692	0.617	0.325	8.44778e-103	coelEpi	PTK7
3.37591e-107	0.335775	0.246	0.034	9.53018e-103	coelEpi	PCOLCE2
1.29127e-106	-0.759203	0.315	0.574	3.64525e-102	coelEpi	FAM210B
1.74335e-106	-0.658859	0.068	0.349	4.92147e-102	coelEpi	ALDH1A1
5.0907e-106	-0.568396	0.081	0.371	1.43711e-101	coelEpi	PPP1R1A
6.56205e-106	0.629973	0.576	0.245	1.85247e-101	coelEpi	RARRES2
2.6629e-105	-0.634493	0.216	0.509	7.51736e-101	coelEpi	SEC14L1
4.68548e-105	0.47242	0.439	0.149	1.32271e-100	coelEpi	ST3GAL1
2.52399e-104	-0.577246	0.211	0.509	7.12522e-100	coelEpi	SCAP
2.8922e-104	-0.593814	0.155	0.452	8.16467e-100	coelEpi	CMIP
3.75557e-104	0.420608	0.998	0.993	1.0602e-99	coelEpi	RPL41
8.72555e-104	0.755255	0.847	0.611	2.46322e-99	coelEpi	COL1A2
1.07258e-103	0.495837	0.554	0.207	3.0279e-99	coelEpi	PTGS1
4.1342e-103	0.433741	0.416	0.118	1.16708e-98	coelEpi	MEIS1
9.50564e-103	0.33618	0.194	0.018	2.68344e-98	coelEpi	FGF7
4.9614e-102	-0.585194	0.248	0.549	1.4006e-97	coelEpi	LPIN2
1.25281e-101	0.513956	0.378	0.112	3.53668e-97	coelEpi	CEBPB
1.48965e-101	-0.692151	0.106	0.408	4.20528e-97	coelEpi	SLC2A3
1.98913e-101	-0.783566	0.094	0.37	5.61531e-97	coelEpi	CTSV
5.70926e-101	0.168536	0.1	0.001	1.61172e-96	coelEpi	ALOX15
6.22902e-101	0.617244	0.511	0.201	1.75845e-96	coelEpi	SPRY1
6.32902e-101	0.46978	0.926	0.835	1.78668e-96	coelEpi	NREP
6.85959e-101	0.277829	0.153	0.008	1.93646e-96	coelEpi	LINC01133
8.18427e-101	-0.424463	0.033	0.295	2.31042e-96	coelEpi	NR5A1
1.72954e-100	-0.633708	0.08	0.367	4.8825e-96	coelEpi	SUSD3
2.14221e-99	-0.588705	0.182	0.469	6.04747e-95	coelEpi	ZNF431
5.12543e-99	0.451945	0.374	0.105	1.44691e-94	coelEpi	BMP4
8.24612e-99	0.462534	0.403	0.119	2.32788e-94	coelEpi	FLRT2
8.68462e-99	0.364056	0.98	0.954	2.45167e-94	coelEpi	RPL7
1.03835e-98	-0.666249	0.046	0.315	2.93127e-94	coelEpi	PHLDA1
2.53638e-98	0.694842	0.745	0.4	7.1602e-94	coelEpi	IGFBP5
3.12675e-98	-0.637567	0.157	0.434	8.82683e-94	coelEpi	MID1IP1
4.04802e-98	-0.522323	0.113	0.403	1.14276e-93	coelEpi	SLF2
4.35134e-98	-0.587031	0.021	0.259	1.22838e-93	coelEpi	FHOD3
5.29527e-98	0.361797	0.323	0.077	1.49485e-93	coelEpi	FKBP11
1.30772e-97	0.271414	0.996	0.988	3.69169e-93	coelEpi	RPL15
2.78395e-97	-0.469579	0.031	0.28	7.8591e-93	coelEpi	MME
4.69597e-97	0.303041	0.22	0.019	1.32567e-92	coelEpi	DSC3
2.40974e-96	0.3192	0.266	0.046	6.80271e-92	coelEpi	HSPB7
4.44793e-96	0.375563	0.271	0.052	1.25565e-91	coelEpi	PDZK1IP1
8.70613e-96	0.365069	0.274	0.049	2.45774e-91	coelEpi	CYBRD1
1.83334e-95	-0.790891	0.818	0.915	5.17552e-91	coelEpi	MGST3
2.07737e-95	-0.645622	0.021	0.255	5.86443e-91	coelEpi	C15orf48
1.86113e-94	0.475702	0.527	0.208	5.25396e-90	coelEpi	RBPMS
2.5569e-94	0.449221	0.439	0.145	7.21813e-90	coelEpi	FHL1
5.64261e-94	0.312298	0.986	0.974	1.59291e-89	coelEpi	RPL22
7.56006e-94	0.410481	0.247	0.047	2.1342e-89	coelEpi	ITM2A
1.77179e-93	-0.450616	0.05	0.312	5.00176e-89	coelEpi	EPN3
3.89021e-93	-0.604672	0.755	0.886	1.09821e-88	coelEpi	RBP1
1.34395e-92	-0.64249	0.086	0.379	3.79396e-88	coelEpi	PPP1R14A
2.05033e-92	0.432426	0.449	0.176	5.78807e-88	coelEpi	ANXA11
7.79486e-92	-0.613304	0.329	0.593	2.20049e-87	coelEpi	OBSL1
8.99805e-92	-0.396231	0.022	0.256	2.54015e-87	coelEpi	CCDC69
9.24459e-92	-0.607714	0.231	0.51	2.60975e-87	coelEpi	HLTF
1.69938e-91	0.644704	0.412	0.124	4.79736e-87	coelEpi	HMGA2
2.27957e-91	0.324072	0.204	0.03	6.43524e-87	coelEpi	PODN
3.12903e-91	0.318846	0.288	0.042	8.83325e-87	coelEpi	GPC4
5.92557e-91	0.475437	0.501	0.179	1.67279e-86	coelEpi	TSHZ2
1.48156e-90	0.356902	0.345	0.087	4.18245e-86	coelEpi	TMEM37
1.50371e-90	0.324787	0.162	0.014	4.24497e-86	coelEpi	BCAN
2.17567e-90	0.443628	0.415	0.136	6.14193e-86	coelEpi	SEMA3B
4.63568e-90	0.279811	0.254	0.039	1.30865e-85	coelEpi	NGF
6.42842e-90	-0.460241	0.073	0.329	1.81474e-85	coelEpi	ANKH
7.32042e-90	0.319597	0.266	0.042	2.06656e-85	coelEpi	HOXA7
8.61635e-90	0.400538	0.344	0.082	2.4324e-85	coelEpi	CELF2
1.92197e-89	-0.477528	0.027	0.267	5.42573e-85	coelEpi	IRX3
2.9981e-89	0.181189	0.139	0.006	8.46363e-85	coelEpi	EEF1A2
5.62103e-89	0.228836	0.178	0.018	1.58682e-84	coelEpi	CARNS1
1.15452e-88	0.397488	0.244	0.054	3.2592e-84	coelEpi	NELL2
3.04452e-88	0.344075	0.299	0.058	8.59468e-84	coelEpi	LTC4S
9.72181e-88	0.256423	0.996	0.993	2.74447e-83	coelEpi	RPL32
2.73597e-87	0.442665	0.607	0.317	7.72364e-83	coelEpi	CLEC11A
3.62273e-87	0.438552	0.526	0.219	1.0227e-82	coelEpi	FRMD4B
4.17473e-87	-0.508045	0.808	0.903	1.17853e-82	coelEpi	PEBP1
1.11311e-86	0.287744	0.992	0.984	3.1423e-82	coelEpi	RPS6
1.13643e-86	-0.676063	0.041	0.27	3.20813e-82	coelEpi	CYP11A1
1.35334e-86	-0.664927	0.33	0.57	3.82047e-82	coelEpi	TMEM97
1.4144e-86	-0.571492	0.384	0.616	3.99284e-82	coelEpi	PDRG1
1.62735e-86	0.415876	0.464	0.174	4.59402e-82	coelEpi	CNTN4
4.01711e-86	0.441597	0.592	0.291	1.13403e-81	coelEpi	VASN
4.85295e-86	0.439993	0.511	0.218	1.36999e-81	coelEpi	NET1
7.44161e-86	-0.521221	0.151	0.417	2.10077e-81	coelEpi	AP1S2
1.98247e-85	-0.478488	0.053	0.291	5.59652e-81	coelEpi	MMP15
2.80231e-85	0.376726	0.351	0.097	7.91091e-81	coelEpi	PRICKLE1
6.6028e-85	0.340458	0.215	0.038	1.86397e-80	coelEpi	CARD16
6.99048e-85	-0.474551	0.089	0.342	1.97341e-80	coelEpi	PDK1
1.03597e-84	0.33289	0.995	0.988	2.92455e-80	coelEpi	H3F3B
1.17074e-84	0.214864	0.189	0.019	3.30501e-80	coelEpi	HRH2
5.33384e-84	0.415071	0.352	0.104	1.50574e-79	coelEpi	COL5A2
8.65544e-84	0.540776	0.235	0.053	2.44343e-79	coelEpi	CLIC3
8.78324e-84	-0.757289	0.212	0.453	2.47951e-79	coelEpi	G6PD
9.48562e-84	0.375409	0.965	0.943	2.67779e-79	coelEpi	EEF2
1.11596e-83	0.25262	1	0.995	3.15035e-79	coelEpi	RPL13
1.80095e-83	-0.537677	0.095	0.343	5.0841e-79	coelEpi	PRR15
5.2239e-83	-0.520441	0.629	0.792	1.47471e-78	coelEpi	COMT
8.93178e-83	0.189717	0.138	0.008	2.52144e-78	coelEpi	COL8A2
9.68612e-83	0.530932	0.384	0.081	2.73439e-78	coelEpi	CRIP1
1.23777e-82	0.223584	0.109	0.005	3.49423e-78	coelEpi	COL6A6
2.40683e-82	0.349015	0.244	0.045	6.79447e-78	coelEpi	COL9A2
2.87214e-82	0.415277	0.9	0.756	8.10805e-78	coelEpi	C12orf57
5.92525e-82	0.424017	0.455	0.155	1.6727e-77	coelEpi	ISLR
4.38946e-81	-1.06675	0.175	0.425	1.23914e-76	coelEpi	MT2A
6.5634e-81	-0.500896	0.279	0.538	1.85285e-76	coelEpi	PLA2G12A
1.01459e-80	-0.479655	0.117	0.377	2.86419e-76	coelEpi	IQCG
1.47912e-80	0.476689	0.715	0.443	4.17555e-76	coelEpi	GAS6
1.54637e-80	-0.407253	0.079	0.336	4.3654e-76	coelEpi	SIGLEC11
1.81987e-80	0.531481	0.711	0.487	5.1375e-76	coelEpi	SELENOP
2.63012e-80	0.431617	0.737	0.508	7.42482e-76	coelEpi	NECTIN2
2.69914e-80	-0.569515	0.782	0.868	7.61966e-76	coelEpi	ALDOA
2.98843e-80	0.364399	0.354	0.092	8.43632e-76	coelEpi	SMTNL2
1.07612e-79	0.224646	0.158	0.011	3.03787e-75	coelEpi	EDN2
1.30957e-79	0.464801	0.26	0.07	3.69693e-75	coelEpi	TCF21
2.81087e-79	-0.471851	0.096	0.342	7.93509e-75	coelEpi	ECE1
4.18385e-79	0.178598	0.106	0.003	1.1811e-74	coelEpi	PREX2
7.90594e-79	-0.433159	0.048	0.28	2.23185e-74	coelEpi	GREB1
1.35635e-78	-0.675979	0.784	0.862	3.82898e-74	coelEpi	ENO1
1.39125e-78	0.278198	0.249	0.05	3.92751e-74	coelEpi	CPNE2
1.46981e-78	0.397462	0.369	0.119	4.14927e-74	coelEpi	HMGA1
1.6246e-78	-0.511075	0.297	0.545	4.58626e-74	coelEpi	JPT1
2.1012e-78	0.369673	0.196	0.032	5.9317e-74	coelEpi	IGFBP6
3.59907e-78	0.209375	0.184	0.017	1.01602e-73	coelEpi	KLK6
3.78154e-78	0.268459	0.998	0.992	1.06753e-73	coelEpi	RPS15A
3.91298e-78	0.357536	0.386	0.129	1.10463e-73	coelEpi	VAMP8
4.99107e-78	0.362692	0.922	0.818	1.40898e-73	coelEpi	SSR2
5.20469e-78	0.320899	0.26	0.056	1.46928e-73	coelEpi	COL5A1
7.3128e-78	0.433382	0.373	0.104	2.0644e-73	coelEpi	TNNI1
7.9239e-78	0.227415	0.181	0.024	2.23692e-73	coelEpi	SH3GL2
1.18043e-77	0.292995	0.187	0.03	3.33237e-73	coelEpi	EDNRB
1.27983e-77	0.525901	0.549	0.283	3.61296e-73	coelEpi	ID2
1.33729e-77	-0.359084	0.028	0.233	3.77516e-73	coelEpi	ST6GALNAC1
1.22673e-76	-0.47854	0.166	0.421	3.46306e-72	coelEpi	ZNF703
1.6734e-76	-0.580892	0.054	0.27	4.724e-72	coelEpi	PLAC1
1.80485e-76	-0.353014	0.008	0.191	5.09508e-72	coelEpi	VAT1L
2.40998e-76	0.427042	0.837	0.638	6.80338e-72	coelEpi	SNHG8
4.21822e-76	-0.350539	0.03	0.243	1.1908e-71	coelEpi	GIPC2
6.36187e-76	-0.623354	0.021	0.209	1.79596e-71	coelEpi	SOX9
6.84921e-76	0.154365	0.124	0.005	1.93353e-71	coelEpi	PLPP4
7.08873e-76	-0.739052	0.464	0.675	2.00115e-71	coelEpi	DDIT4
7.4588e-76	0.351904	0.33	0.089	2.10562e-71	coelEpi	TGFB1I1
1.69023e-75	0.226711	0.189	0.024	4.77152e-71	coelEpi	TGFB3
1.84227e-75	0.183787	0.138	0.01	5.20072e-71	coelEpi	SOX8
1.90534e-75	-0.508395	0.286	0.541	5.37878e-71	coelEpi	TIMP2
2.75548e-75	0.433023	0.819	0.651	7.77873e-71	coelEpi	PLP2
4.89575e-75	-0.385333	0.049	0.267	1.38207e-70	coelEpi	REXO1
6.10149e-75	-0.494307	0.565	0.75	1.72245e-70	coelEpi	GPX4
7.39346e-75	0.328757	0.968	0.925	2.08717e-70	coelEpi	EEF1B2
7.65679e-75	0.288183	0.124	0.005	2.16151e-70	coelEpi	KRT7
1.80599e-74	-0.491445	0.11	0.355	5.09831e-70	coelEpi	CNTNAP4
1.86146e-74	-0.542768	0.412	0.618	5.2549e-70	coelEpi	RHOBTB3
2.22532e-74	0.244556	0.995	0.992	6.28209e-70	coelEpi	RPL8
3.75026e-74	0.249851	0.191	0.027	1.0587e-69	coelEpi	B3GLCT
5.04514e-74	0.152573	0.117	0.005	1.42424e-69	coelEpi	ALX1
5.43608e-74	-0.49758	0.555	0.735	1.5346e-69	coelEpi	BNIP3L
6.30796e-74	-0.484172	0.358	0.588	1.78074e-69	coelEpi	ECI2
6.53405e-74	0.248834	0.995	0.991	1.84456e-69	coelEpi	RPL35A
1.03062e-73	-0.49907	0.182	0.412	2.90945e-69	coelEpi	PPIF
1.2372e-73	-0.704326	0.414	0.607	3.49261e-69	coelEpi	BNIP3
3.20213e-73	0.458387	0.336	0.087	9.0396e-69	coelEpi	CA9
4.81463e-73	0.266545	0.118	0.009	1.35917e-68	coelEpi	HSD17B2
1.24548e-72	0.110921	0.083	0.001	3.51598e-68	coelEpi	GATA2-AS1
1.41243e-72	-1.06377	0.03	0.221	3.9873e-68	coelEpi	SERPINA5
1.521e-72	0.339267	0.119	0.01	4.29379e-68	coelEpi	C3
2.22934e-72	0.199724	0.135	0.008	6.29343e-68	coelEpi	MRGPRF
2.86134e-72	-0.449586	0.165	0.403	8.07757e-68	coelEpi	SCD5
5.81901e-72	-0.503694	0.059	0.264	1.64271e-67	coelEpi	TUBB3
7.53054e-72	-0.474531	0.01	0.189	2.12587e-67	coelEpi	NR1H4
1.08996e-71	-0.332923	0.032	0.231	3.07696e-67	coelEpi	DPF3
3.09816e-71	0.20864	0.171	0.016	8.74612e-67	coelEpi	HOXA3
4.06121e-71	0.227807	0.204	0.033	1.14648e-66	coelEpi	GAL3ST3
4.26827e-71	-0.369814	0.019	0.209	1.20493e-66	coelEpi	LAMA1
5.07997e-71	0.293819	0.212	0.033	1.43408e-66	coelEpi	GSTM5
5.82539e-71	0.418131	0.639	0.406	1.64451e-66	coelEpi	NPDC1
1.23296e-70	0.25571	0.993	0.979	3.48065e-66	coelEpi	HSP90AB1
1.32683e-70	-0.509805	0.626	0.781	3.74563e-66	coelEpi	PRKAR1A
2.04616e-70	-0.441361	0.495	0.714	5.77631e-66	coelEpi	AMHR2
3.41779e-70	-0.340261	0.016	0.197	9.64842e-66	coelEpi	THSD7A
3.7502e-70	0.242006	0.162	0.015	1.05868e-65	coelEpi	CFH
3.86822e-70	0.469117	0.536	0.279	1.092e-65	coelEpi	FLRT3
5.00567e-70	0.143383	0.116	0.008	1.4131e-65	coelEpi	PCOLCE-AS1
6.37081e-70	-0.480709	0.117	0.351	1.79848e-65	coelEpi	CRNDE
6.75389e-70	-0.418136	0.101	0.324	1.90662e-65	coelEpi	GSE1
7.08117e-70	0.433973	0.617	0.303	1.99901e-65	coelEpi	COL18A1
8.09103e-70	0.432869	0.422	0.155	2.2841e-65	coelEpi	SEMA3C
1.01471e-69	-0.331612	0.018	0.197	2.86453e-65	coelEpi	MICAL2
1.18831e-69	-0.334969	0.009	0.177	3.3546e-65	coelEpi	SYCN
2.23799e-69	-0.497565	0.05	0.256	6.31785e-65	coelEpi	MIR503HG
2.43843e-69	-0.645839	0.348	0.57	6.8837e-65	coelEpi	ATP1B1
3.95669e-69	-0.387328	0.073	0.289	1.11697e-64	coelEpi	FEZ1
5.58615e-69	0.409324	0.282	0.076	1.57697e-64	coelEpi	HHIP
5.81562e-69	0.157022	0.124	0.007	1.64175e-64	coelEpi	LGI2
7.47306e-69	-0.595368	0.948	0.964	2.10964e-64	coelEpi	MT-ND2
9.45295e-69	0.36274	0.362	0.111	2.66857e-64	coelEpi	RGS10
1.0157e-68	0.407376	0.828	0.659	2.86732e-64	coelEpi	TMEM59
1.42213e-68	0.394256	0.633	0.391	4.01468e-64	coelEpi	TRAPPC2L
1.7218e-68	-0.484504	0.303	0.525	4.86064e-64	coelEpi	BCAT2
1.93499e-68	0.286102	0.196	0.038	5.46249e-64	coelEpi	TEKT3
2.18524e-68	-0.425834	0.995	0.995	6.16894e-64	coelEpi	FTH1
5.14755e-68	0.2714	0.193	0.029	1.45315e-63	coelEpi	SMPD3
5.37383e-68	0.43027	0.647	0.373	1.51703e-63	coelEpi	WNT2B
5.37572e-68	0.372104	0.518	0.223	1.51756e-63	coelEpi	CNN2
6.18012e-68	0.403902	0.656	0.389	1.74465e-63	coelEpi	MYADM
9.26906e-68	-0.469329	0.115	0.336	2.61666e-63	coelEpi	JCAD
1.15619e-67	-0.47843	0.314	0.555	3.26393e-63	coelEpi	CADM1
3.03655e-67	0.342659	0.359	0.131	8.57218e-63	coelEpi	CAPG
3.67871e-67	0.142888	0.127	0.005	1.0385e-62	coelEpi	SERTAD4
5.40754e-67	0.197452	0.168	0.014	1.52655e-62	coelEpi	HOXA5
1.15136e-66	-0.464299	0.214	0.442	3.2503e-62	coelEpi	PTS
1.3258e-66	0.24332	0.226	0.037	3.74274e-62	coelEpi	NXPH2
1.52246e-66	-0.282712	0.016	0.185	4.29789e-62	coelEpi	TDGF1
4.40209e-66	0.575343	0.772	0.582	1.24271e-61	coelEpi	RHOB
1.03269e-65	0.28125	0.277	0.078	2.91527e-61	coelEpi	EFNB3
1.15034e-65	0.291205	0.21	0.043	3.24741e-61	coelEpi	MEGF6
1.92024e-65	0.479213	0.861	0.729	5.42084e-61	coelEpi	RSRP1
4.66492e-65	0.457235	0.605	0.309	1.31691e-60	coelEpi	TIMP3
5.31313e-65	0.260723	0.201	0.022	1.4999e-60	coelEpi	SMOC2
7.24538e-65	-0.297728	0.012	0.179	2.04537e-60	coelEpi	KIAA1324
7.74555e-65	0.22665	0.993	0.986	2.18657e-60	coelEpi	RPL14
1.42358e-64	0.126953	0.088	0.003	4.01878e-60	coelEpi	KCNQ2
1.47916e-64	-0.528519	0.921	0.945	4.17568e-60	coelEpi	TPI1
2.3154e-64	-0.348286	0.012	0.179	6.53638e-60	coelEpi	RIMS4
4.4593e-64	-0.469911	0.143	0.36	1.25886e-59	coelEpi	C3orf58
4.84588e-64	0.288187	0.257	0.064	1.36799e-59	coelEpi	PTGIS
5.00972e-64	0.360305	0.384	0.15	1.41425e-59	coelEpi	MST1
6.2383e-64	0.264591	0.086	0.004	1.76107e-59	coelEpi	ADIRF
9.19325e-64	0.386469	0.397	0.164	2.59525e-59	coelEpi	BGN
1.05732e-63	-0.354365	0.043	0.238	2.98482e-59	coelEpi	CAMSAP3
1.13258e-63	0.24939	0.992	0.981	3.19728e-59	coelEpi	RPL9
1.33401e-63	0.190647	0.136	0.015	3.76591e-59	coelEpi	EPB42
1.71262e-63	-0.405026	0.048	0.256	4.83474e-59	coelEpi	AKR1C1
1.894e-63	0.276658	0.242	0.058	5.34677e-59	coelEpi	HAND2-AS1
5.2155e-63	0.387568	0.687	0.461	1.47233e-58	coelEpi	EIF4EBP1
1.01106e-62	0.228687	0.993	0.993	2.85423e-58	coelEpi	RPL18A
1.07227e-62	-0.3546	0.043	0.231	3.02702e-58	coelEpi	TESC
1.13276e-62	-0.468057	0.007	0.156	3.19778e-58	coelEpi	INHBB
1.1764e-62	0.446288	0.583	0.366	3.32097e-58	coelEpi	GATA6
2.125e-62	0.304693	0.384	0.151	5.99889e-58	coelEpi	PYCR1
2.33684e-62	0.269229	0.286	0.082	6.59691e-58	coelEpi	ADAM15
2.68965e-62	0.384967	0.504	0.262	7.59287e-58	coelEpi	MDFI
6.63159e-62	0.369623	0.595	0.35	1.8721e-57	coelEpi	GCA
6.72426e-62	-0.336348	0.054	0.252	1.89826e-57	coelEpi	RHOBTB2
7.21614e-62	0.283827	0.198	0.039	2.03712e-57	coelEpi	TGFBI
7.67308e-62	-0.520459	0.127	0.323	2.16611e-57	coelEpi	SEPT6
9.01549e-62	-0.420324	0.013	0.17	2.54507e-57	coelEpi	PROK1
9.61906e-62	0.351319	0.475	0.21	2.71546e-57	coelEpi	SSBP2
1.14557e-61	0.445597	0.679	0.395	3.23396e-57	coelEpi	PRSS35
1.56255e-61	-0.450497	0.26	0.489	4.41107e-57	coelEpi	ARL6IP1
3.18962e-61	-0.546377	0.221	0.423	9.00429e-57	coelEpi	TSC22D3
3.19895e-61	-0.383266	0.121	0.331	9.03063e-57	coelEpi	DUSP15
6.2111e-61	-0.359394	0.028	0.2	1.75339e-56	coelEpi	HK2
6.89926e-61	0.199201	0.152	0.021	1.94766e-56	coelEpi	PLAUR
9.12072e-61	0.299822	0.149	0.019	2.57478e-56	coelEpi	CAVIN2
9.92002e-61	-0.504496	0.346	0.547	2.80042e-56	coelEpi	MSH6
1.00701e-60	0.194174	0.998	0.991	2.84279e-56	coelEpi	RPL19
1.4717e-60	0.422838	0.522	0.288	4.15462e-56	coelEpi	TSPO
1.50658e-60	0.35452	0.261	0.087	4.25307e-56	coelEpi	LXN
1.54732e-60	-0.441626	0.248	0.463	4.36809e-56	coelEpi	TMEM41A
1.60857e-60	-0.419653	0.172	0.399	4.54098e-56	coelEpi	MAP3K1
2.72141e-60	-0.470564	0.166	0.378	7.68255e-56	coelEpi	HPRT1
2.91799e-60	0.236965	0.993	0.99	8.23748e-56	coelEpi	RPS13
3.72229e-60	0.209317	0.189	0.035	1.0508e-55	coelEpi	ROM1
4.32054e-60	-0.420976	0.191	0.403	1.21969e-55	coelEpi	MAP4K4
4.82414e-60	0.277095	0.336	0.108	1.36186e-55	coelEpi	TMEM173
1.04433e-59	0.120397	0.105	0.004	2.94815e-55	coelEpi	COPZ2
1.21361e-59	0.514832	0.521	0.282	3.42603e-55	coelEpi	ID4
1.24253e-59	-0.41947	0.236	0.457	3.50767e-55	coelEpi	LMBR1
1.2827e-59	-0.373742	0.085	0.282	3.62107e-55	coelEpi	MAPK13
1.3595e-59	-0.428399	0.129	0.324	3.83787e-55	coelEpi	CEMIP2
1.41353e-59	-0.551683	0.254	0.462	3.9904e-55	coelEpi	DSEL
1.42071e-59	0.185152	0.17	0.022	4.01065e-55	coelEpi	ZNF467
1.55147e-59	-0.300564	0.027	0.197	4.37981e-55	coelEpi	RASL12
2.16691e-59	0.351614	0.396	0.148	6.11719e-55	coelEpi	CDC42EP3
2.17141e-59	0.378524	0.559	0.311	6.12988e-55	coelEpi	CDK6
2.24667e-59	-0.282651	0.005	0.144	6.34236e-55	coelEpi	SLC27A6
2.30085e-59	-0.349363	0.063	0.258	6.4953e-55	coelEpi	SDK2
3.0025e-59	0.280168	0.152	0.025	8.47606e-55	coelEpi	THBD
5.39517e-59	-0.275101	0.015	0.175	1.52306e-54	coelEpi	ZPBP
5.60801e-59	-0.471737	0.309	0.527	1.58314e-54	coelEpi	SYNE2
6.94749e-59	0.40641	0.621	0.373	1.96128e-54	coelEpi	MMP2
7.46184e-59	-0.488202	0.629	0.75	2.10648e-54	coelEpi	SAT2
7.92049e-59	0.440252	0.356	0.127	2.23595e-54	coelEpi	PLAT
9.3406e-59	-0.344426	0.06	0.241	2.63685e-54	coelEpi	DACH1
1.53837e-58	0.370751	0.585	0.356	4.34283e-54	coelEpi	TMEM109
1.61462e-58	-0.515259	0.076	0.27	4.55808e-54	coelEpi	DPEP1
1.6452e-58	-0.332736	0.071	0.269	4.64441e-54	coelEpi	BCL2
1.72607e-58	-0.411636	0.201	0.428	4.8727e-54	coelEpi	TVP23A
3.41599e-58	-1.69642	0.162	0.314	9.64334e-54	coelEpi	APOA1
3.58105e-58	0.416087	0.478	0.196	1.01093e-53	coelEpi	LRRN3
6.1007e-58	0.314611	0.323	0.111	1.72223e-53	coelEpi	HHIP-AS1
8.23407e-58	-0.775931	0.009	0.155	2.32448e-53	coelEpi	TAC1
9.20274e-58	-0.33784	0.031	0.196	2.59793e-53	coelEpi	HRASLS
9.63353e-58	-0.458447	0.061	0.237	2.71955e-53	coelEpi	NXPH4
1.42205e-57	-0.485442	0.286	0.481	4.01444e-53	coelEpi	SMIM1
1.62454e-57	0.238636	0.999	0.991	4.58609e-53	coelEpi	RPL39
1.87919e-57	-0.417302	0.774	0.869	5.30496e-53	coelEpi	DDX5
2.09592e-57	-0.3079	0.018	0.169	5.91677e-53	coelEpi	AC123912.4
2.67221e-57	-0.341898	0.012	0.166	7.54366e-53	coelEpi	CILP
3.60031e-57	0.318274	0.373	0.147	1.01637e-52	coelEpi	SLC9A3R2
5.37606e-57	-0.43769	0.263	0.468	1.51766e-52	coelEpi	TSPAN13
7.43141e-57	0.391363	0.678	0.413	2.09789e-52	coelEpi	COL11A1
9.43295e-57	-0.495059	0.276	0.474	2.66292e-52	coelEpi	HUWE1
9.72613e-57	0.194064	0.149	0.025	2.74569e-52	coelEpi	CYP2W1
1.2214e-56	-0.401879	0.087	0.288	3.44801e-52	coelEpi	SCD
2.30996e-56	-0.412013	0.301	0.504	6.52102e-52	coelEpi	MBOAT7
2.49207e-56	-0.337632	0.068	0.253	7.03512e-52	coelEpi	DUBR
2.50235e-56	-0.443877	0.298	0.511	7.06414e-52	coelEpi	PHACTR2
4.6365e-56	0.154796	0.087	0.005	1.30888e-51	coelEpi	WNT16
1.16191e-55	0.467554	0.413	0.223	3.28007e-51	coelEpi	SYT1
1.16273e-55	-0.400964	0.102	0.298	3.28239e-51	coelEpi	GNG2
1.75898e-55	-0.424608	0.153	0.362	4.96561e-51	coelEpi	MT1X
1.87736e-55	0.29887	0.223	0.054	5.29979e-51	coelEpi	PDGFRA
2.37823e-55	-0.32526	0.09	0.285	6.71375e-51	coelEpi	PRKD1
2.40017e-55	0.342507	0.396	0.171	6.77569e-51	coelEpi	NEO1
5.24695e-55	0.39661	0.771	0.583	1.48122e-50	coelEpi	EMP3
5.41178e-55	0.215579	0.999	0.989	1.52775e-50	coelEpi	RPL37
5.64235e-55	0.131653	0.091	0.006	1.59284e-50	coelEpi	SLC35D3
6.78519e-55	0.341172	0.788	0.617	1.91546e-50	coelEpi	IMPDH2
6.85256e-55	-0.468532	0.252	0.454	1.93448e-50	coelEpi	ZBTB20
8.11027e-55	0.282845	0.991	0.987	2.28953e-50	coelEpi	RPS2
8.2554e-55	0.301357	0.278	0.074	2.3305e-50	coelEpi	COL16A1
8.45883e-55	0.16236	0.115	0.011	2.38793e-50	coelEpi	PGF
8.78535e-55	0.209016	0.995	0.988	2.4801e-50	coelEpi	RPL29
8.88413e-55	-0.601265	0.256	0.483	2.50799e-50	coelEpi	HLA-B
1.34193e-54	0.338549	0.409	0.176	3.78827e-50	coelEpi	PIK3R1
1.43204e-54	-0.429421	0.183	0.374	4.04265e-50	coelEpi	PSAT1
1.6439e-54	0.210292	0.139	0.022	4.64072e-50	coelEpi	VSIR
1.68911e-54	-0.313776	0.045	0.219	4.76836e-50	coelEpi	SEMA7A
1.73268e-54	-0.527842	0.245	0.442	4.89135e-50	coelEpi	CYB5A
1.93934e-54	-0.362482	0.138	0.331	5.47477e-50	coelEpi	ING2
2.35419e-54	0.157565	0.129	0.016	6.64588e-50	coelEpi	CYP2S1
2.7084e-54	0.150535	0.123	0.01	7.6458e-50	coelEpi	FGF18
2.72799e-54	-0.321803	0.019	0.162	7.70112e-50	coelEpi	MGST1
4.45543e-54	-0.419881	0.189	0.377	1.25777e-49	coelEpi	KLHDC8B
6.71922e-54	0.17408	0.141	0.013	1.89684e-49	coelEpi	PTGER2
7.32446e-54	0.161462	0.143	0.02	2.06769e-49	coelEpi	AC009041.2
8.36239e-54	-0.668596	0.347	0.514	2.3607e-49	coelEpi	S100A13
9.52019e-54	0.207756	0.997	0.992	2.68755e-49	coelEpi	RPS19
1.042e-53	-0.353698	0.122	0.319	2.94157e-49	coelEpi	TCHP
1.2616e-53	-0.284298	0.041	0.209	3.56149e-49	coelEpi	CDO1
1.33775e-53	0.498076	0.747	0.514	3.77648e-49	coelEpi	IFITM1
1.75169e-53	0.192081	0.122	0.015	4.94501e-49	coelEpi	LRP2
1.7797e-53	0.142758	0.109	0.009	5.02409e-49	coelEpi	SLC7A4
1.81127e-53	-0.394667	0.066	0.233	5.11321e-49	coelEpi	UNC5B
1.9897e-53	-0.449393	0.437	0.611	5.61691e-49	coelEpi	TGIF1
2.06244e-53	-0.361073	0.131	0.328	5.82228e-49	coelEpi	NRIP1
2.42756e-53	-0.485075	0.335	0.517	6.85299e-49	coelEpi	ECH1
2.60509e-53	0.155498	0.127	0.012	7.35418e-49	coelEpi	NR2F1-AS1
2.80739e-53	0.319605	0.499	0.266	7.92525e-49	coelEpi	TMED3
3.62014e-53	-0.379642	0.482	0.669	1.02197e-48	coelEpi	FXYD6
3.68229e-53	0.334201	0.402	0.122	1.03951e-48	coelEpi	CRYAB
4.40808e-53	0.208035	0.184	0.034	1.2444e-48	coelEpi	NKAIN4
4.42582e-53	0.261095	0.188	0.027	1.24941e-48	coelEpi	SLIT3
4.92628e-53	-0.431672	0.329	0.527	1.39069e-48	coelEpi	TMPO
6.32034e-53	0.360122	0.485	0.255	1.78423e-48	coelEpi	SELENOM
6.9491e-53	-0.388703	0.701	0.818	1.96173e-48	coelEpi	EIF4G2
6.99062e-53	-0.489717	0.587	0.737	1.97345e-48	coelEpi	FSCN1
8.57164e-53	-0.3828	0.151	0.346	2.41977e-48	coelEpi	ZNF83
8.67383e-53	-0.401534	0.966	0.975	2.44862e-48	coelEpi	MYL6
8.77809e-53	-0.449766	0.289	0.495	2.47806e-48	coelEpi	PLAGL1
8.92573e-53	0.382832	0.976	0.954	2.51973e-48	coelEpi	VIM
1.04043e-52	-0.381562	0.258	0.463	2.93715e-48	coelEpi	MED25
1.44285e-52	0.160077	0.113	0.011	4.07316e-48	coelEpi	AL136088.1
2.60637e-52	-0.357141	0.102	0.289	7.35779e-48	coelEpi	NAV2
2.80122e-52	0.223058	0.99	0.973	7.90784e-48	coelEpi	RPS9
4.0731e-52	-0.366042	0.056	0.219	1.14984e-47	coelEpi	JAM2
5.48292e-52	-0.219996	0.013	0.153	1.54783e-47	coelEpi	IGDCC4
7.59825e-52	0.174984	0.125	0.013	2.14499e-47	coelEpi	NTNG1
1.62364e-51	-0.371464	0.167	0.365	4.58355e-47	coelEpi	PBXIP1
1.73016e-51	0.518509	0.209	0.073	4.88423e-47	coelEpi	SFRP2
1.90239e-51	0.253802	0.224	0.057	5.37044e-47	coelEpi	PDGFD
2.90632e-51	-0.499906	0.838	0.886	8.20454e-47	coelEpi	PRDX1
3.39224e-51	-0.39068	0.036	0.188	9.5763e-47	coelEpi	G0S2
3.57769e-51	-0.542193	0.988	0.982	1.00998e-46	coelEpi	MT-ND1
3.70521e-51	0.320627	0.482	0.23	1.04598e-46	coelEpi	EFNA1
3.85126e-51	-0.412664	0.702	0.818	1.08721e-46	coelEpi	DDX17
4.19953e-51	0.519799	0.775	0.606	1.18553e-46	coelEpi	FABP5
6.08879e-51	-0.441039	0.148	0.341	1.71886e-46	coelEpi	SDC4
7.12596e-51	0.381584	0.704	0.42	2.01166e-46	coelEpi	LGALS3
8.19823e-51	0.264118	0.29	0.105	2.31436e-46	coelEpi	COL26A1
8.83094e-51	-0.342451	0.12	0.308	2.49298e-46	coelEpi	ITCH
9.67556e-51	-0.46045	0.521	0.667	2.73141e-46	coelEpi	ANXA6
1.14435e-50	0.247912	0.232	0.062	3.2305e-46	coelEpi	ROR1
1.15767e-50	-0.386694	0.1	0.276	3.26811e-46	coelEpi	TACC1
1.19373e-50	-0.425532	0.134	0.333	3.36991e-46	coelEpi	ENDOD1
1.25154e-50	-0.414156	0.173	0.359	3.5331e-46	coelEpi	MYO10
1.34305e-50	0.439994	0.354	0.166	3.79143e-46	coelEpi	HTRA1
1.48564e-50	-0.362168	0.182	0.381	4.19395e-46	coelEpi	EGLN1
1.63909e-50	-0.312904	0.07	0.242	4.62715e-46	coelEpi	CARMIL1
1.82551e-50	0.105547	0.083	0.004	5.15342e-46	coelEpi	HMSD
1.98245e-50	0.231403	0.268	0.074	5.59646e-46	coelEpi	TEAD3
2.40331e-50	0.207608	0.238	0.054	6.78455e-46	coelEpi	MSRB3
2.49472e-50	-0.227241	0.011	0.138	7.04259e-46	coelEpi	AC112487.1
2.91566e-50	-0.379328	0.292	0.494	8.2309e-46	coelEpi	HIF1A
3.27486e-50	0.133488	0.105	0.01	9.24494e-46	coelEpi	CLMP
3.51072e-50	-0.283829	0.039	0.195	9.91075e-46	coelEpi	DUSP9
3.71415e-50	0.286407	0.299	0.107	1.0485e-45	coelEpi	GOLIM4
3.73983e-50	0.117214	0.089	0.005	1.05576e-45	coelEpi	USH1C
3.79338e-50	0.269605	0.958	0.912	1.07087e-45	coelEpi	HINT1
3.89291e-50	-1.54443	0.015	0.15	1.09897e-45	coelEpi	SST
4.20707e-50	0.56255	0.904	0.875	1.18766e-45	coelEpi	TMSB4X
5.62549e-50	-0.263386	0.032	0.182	1.58808e-45	coelEpi	REPS2
6.19406e-50	-0.273215	0.065	0.253	1.74858e-45	coelEpi	PCED1B
7.11016e-50	0.324827	0.393	0.174	2.0072e-45	coelEpi	BNC2
8.40689e-50	0.303634	0.412	0.185	2.37326e-45	coelEpi	CREB3L1
9.5332e-50	-0.264566	0.015	0.158	2.69122e-45	coelEpi	APCDD1L
9.62653e-50	0.231959	0.242	0.063	2.71757e-45	coelEpi	KREMEN2
1.99229e-49	-0.379194	0.151	0.35	5.62424e-45	coelEpi	CLCN5
2.49627e-49	0.156013	0.114	0.012	7.04698e-45	coelEpi	LOX
2.51376e-49	0.419289	0.31	0.117	7.09635e-45	coelEpi	SOCS3
2.76207e-49	-0.419584	0.262	0.455	7.79732e-45	coelEpi	IVNS1ABP
3.26374e-49	-0.577406	0.055	0.211	9.21354e-45	coelEpi	NEAT1
3.77583e-49	0.215674	0.227	0.05	1.06592e-44	coelEpi	GLT8D2
3.88741e-49	-0.382261	0.238	0.432	1.09742e-44	coelEpi	SFXN1
5.00543e-49	0.260979	0.336	0.104	1.41303e-44	coelEpi	FMOD
6.03717e-49	-0.27755	0.008	0.137	1.70429e-44	coelEpi	NDP
8.94004e-49	0.256667	0.321	0.113	2.52377e-44	coelEpi	FHL3
9.6352e-49	-0.365409	0.171	0.365	2.72002e-44	coelEpi	ZMYM3
1.04041e-48	0.526512	0.881	0.693	2.93706e-44	coelEpi	S100A10
1.0482e-48	0.133416	0.122	0.014	2.95907e-44	coelEpi	RAMP2-AS1
1.15892e-48	-0.378443	0.358	0.55	3.27163e-44	coelEpi	IFI27L2
1.50824e-48	0.338573	0.858	0.728	4.25776e-44	coelEpi	IGFBP4
1.5929e-48	-0.538153	0.044	0.201	4.49675e-44	coelEpi	HERC5
1.63884e-48	-0.274993	0.043	0.192	4.62646e-44	coelEpi	TP53INP1
1.66704e-48	-1.75066	0.061	0.197	4.70604e-44	coelEpi	AMH
1.78587e-48	0.125317	0.108	0.009	5.04152e-44	coelEpi	SECTM1
1.82518e-48	0.172114	0.998	0.995	5.15249e-44	coelEpi	RPL28
1.91005e-48	-0.317649	0.076	0.239	5.39206e-44	coelEpi	ASTN2
2.34636e-48	-0.306488	0.067	0.236	6.62376e-44	coelEpi	SLC35F2
2.39769e-48	-0.247709	0.014	0.143	6.76867e-44	coelEpi	SUSD4
4.75605e-48	-0.452982	0.407	0.574	1.34263e-43	coelEpi	SCARB2
7.13079e-48	0.311758	0.444	0.196	2.01302e-43	coelEpi	DES
7.13085e-48	-0.403759	0.205	0.406	2.01304e-43	coelEpi	DHCR24
7.95084e-48	-0.415042	0.498	0.659	2.24452e-43	coelEpi	BBX
8.34102e-48	0.380436	0.904	0.8	2.35467e-43	coelEpi	RPL36A
9.76625e-48	0.161427	1	0.995	2.75701e-43	coelEpi	RPL7A
1.01353e-47	-0.282288	0.043	0.214	2.86119e-43	coelEpi	DOCK5
1.09015e-47	0.322641	0.387	0.158	3.0775e-43	coelEpi	FRAS1
1.67415e-47	-0.210046	0.013	0.147	4.72612e-43	coelEpi	AC006974.2
2.16865e-47	-0.363723	0.21	0.4	6.1221e-43	coelEpi	ST5
2.22932e-47	-0.265583	0.017	0.155	6.29336e-43	coelEpi	C1orf115
2.23718e-47	-0.342103	0.101	0.275	6.31555e-43	coelEpi	CEP85L
2.62243e-47	-0.371008	0.189	0.378	7.40311e-43	coelEpi	TLE4
2.72925e-47	-0.284502	0.048	0.196	7.70468e-43	coelEpi	AP002884.1
3.38387e-47	-0.277225	0.028	0.167	9.55266e-43	coelEpi	ILDR2
6.28132e-47	0.245566	0.161	0.037	1.77322e-42	coelEpi	PALMD
9.40737e-47	-0.383645	0.065	0.209	2.6557e-42	coelEpi	GPRC5B
1.00181e-46	0.276538	0.295	0.105	2.82812e-42	coelEpi	PRKG1
1.19811e-46	-0.60447	0.471	0.601	3.38228e-42	coelEpi	ZFAND5
2.74972e-46	-0.549266	0.119	0.294	7.76245e-42	coelEpi	NRK
3.78738e-46	0.173676	0.155	0.032	1.06918e-41	coelEpi	ATP7B
4.47132e-46	-0.404931	0.324	0.496	1.26225e-41	coelEpi	SREK1IP1
5.21948e-46	0.257718	0.229	0.069	1.47346e-41	coelEpi	C1S
1.08097e-45	-0.340858	0.046	0.21	3.05157e-41	coelEpi	CLEC4M
1.08203e-45	0.218598	0.996	0.989	3.05458e-41	coelEpi	RPS27
1.0821e-45	-0.398648	0.702	0.811	3.05478e-41	coelEpi	SRSF9
1.13215e-45	-0.308344	0.079	0.242	3.19607e-41	coelEpi	HS6ST1
1.2705e-45	0.337731	0.759	0.577	3.58663e-41	coelEpi	SNHG7
1.2863e-45	-0.215606	0.022	0.152	3.63123e-41	coelEpi	KCNJ5
1.38542e-45	-0.417035	0.216	0.393	3.91104e-41	coelEpi	AC092691.1
1.42086e-45	0.232126	0.181	0.038	4.0111e-41	coelEpi	FBN2
1.42136e-45	0.310149	0.353	0.147	4.01249e-41	coelEpi	RND3
1.45709e-45	0.323613	0.35	0.15	4.11337e-41	coelEpi	WNT5A
1.89093e-45	-0.345216	0.97	0.975	5.33809e-41	coelEpi	BEX3
2.02624e-45	-0.407557	0.142	0.31	5.72008e-41	coelEpi	ITGA6
2.45944e-45	0.303737	0.491	0.274	6.943e-41	coelEpi	TRIP6
2.83523e-45	-0.393883	0.282	0.459	8.00387e-41	coelEpi	ELK1
3.31788e-45	0.217553	0.177	0.034	9.36638e-41	coelEpi	SAMD11
4.70347e-45	0.215345	0.217	0.051	1.32779e-40	coelEpi	EVA1B
4.71614e-45	0.209971	0.224	0.067	1.33137e-40	coelEpi	FCHO1
5.057e-45	0.29823	0.86	0.736	1.42759e-40	coelEpi	ARF4
5.37608e-45	0.283205	0.357	0.146	1.51767e-40	coelEpi	AMOTL2
9.57253e-45	-0.392699	0.012	0.134	2.70232e-40	coelEpi	BRICD5
1.28877e-44	0.148409	0.112	0.016	3.63819e-40	coelEpi	CFAP221
1.77668e-44	-0.317553	0.122	0.304	5.01557e-40	coelEpi	CCDC170
1.84657e-44	-0.500191	0.029	0.165	5.21286e-40	coelEpi	IL32
2.20271e-44	-0.239076	0.021	0.15	6.21825e-40	coelEpi	NR6A1
2.21508e-44	-0.47714	0.158	0.322	6.25318e-40	coelEpi	KIF21A
2.37805e-44	0.135018	0.093	0.009	6.71324e-40	coelEpi	TGM1
2.70011e-44	0.119796	0.097	0.007	7.62242e-40	coelEpi	C1QTNF3
2.90676e-44	0.118172	0.113	0.015	8.20578e-40	coelEpi	PYGM
3.47447e-44	0.21449	0.213	0.062	9.80844e-40	coelEpi	KRTCAP3
4.08327e-44	-0.44949	0.615	0.742	1.15271e-39	coelEpi	PHGDH
4.2305e-44	0.222482	0.976	0.96	1.19427e-39	coelEpi	BTF3
6.46966e-44	-0.275117	0.059	0.214	1.82639e-39	coelEpi	PRRT1
9.43155e-44	0.147317	0.131	0.018	2.66253e-39	coelEpi	DNAJC22
1.09257e-43	-0.185413	0.009	0.127	3.08432e-39	coelEpi	A2ML1
1.09765e-43	0.303495	0.868	0.716	3.09868e-39	coelEpi	CALD1
1.1816e-43	-0.376916	0.463	0.614	3.33566e-39	coelEpi	CAMTA1
1.33155e-43	-0.322477	0.079	0.223	3.75896e-39	coelEpi	MRAS
1.51168e-43	-0.388381	0.958	0.968	4.26747e-39	coelEpi	STMN1
1.51828e-43	0.162415	0.146	0.027	4.28611e-39	coelEpi	AFDN-DT
1.89457e-43	-0.199016	0.012	0.128	5.34838e-39	coelEpi	PLCL2
2.00512e-43	-0.347691	0.219	0.392	5.66045e-39	coelEpi	PGM1
2.12813e-43	-0.213437	0.015	0.141	6.00772e-39	coelEpi	MLXIPL
2.73079e-43	0.10961	0.088	0.005	7.70902e-39	coelEpi	HOXB2
3.3898e-43	0.183374	0.165	0.033	9.56941e-39	coelEpi	PIANP
3.40496e-43	-0.30681	0.073	0.225	9.61221e-39	coelEpi	SNTA1
3.59196e-43	-0.31631	0.117	0.289	1.01401e-38	coelEpi	USP13
4.24065e-43	0.316338	0.658	0.483	1.19714e-38	coelEpi	KDELR2
6.87597e-43	-0.371601	0.244	0.412	1.94109e-38	coelEpi	SLC25A38
7.51697e-43	-0.364554	0.193	0.372	2.12204e-38	coelEpi	YPEL2
8.20843e-43	-0.353288	0.028	0.156	2.31724e-38	coelEpi	BX470209.1
8.21627e-43	0.468489	0.692	0.486	2.31945e-38	coelEpi	LGALS1
8.75426e-43	0.279576	0.932	0.858	2.47133e-38	coelEpi	BSG
8.8109e-43	0.159996	0.128	0.015	2.48732e-38	coelEpi	OSR2
1.01542e-42	0.178801	0.141	0.021	2.86653e-38	coelEpi	AIF1
1.03829e-42	-0.377743	0.294	0.468	2.93108e-38	coelEpi	CXXC5
1.16111e-42	-0.304671	0.062	0.215	3.27782e-38	coelEpi	TANC2
1.34543e-42	-0.234805	0.022	0.145	3.79814e-38	coelEpi	KCNIP1
1.37546e-42	-0.220496	0.015	0.129	3.88292e-38	coelEpi	FAM129A
1.69534e-42	-0.276127	0.059	0.204	4.78595e-38	coelEpi	TFRC
2.22236e-42	-0.417577	0.307	0.484	6.27373e-38	coelEpi	COL4A2
2.4095e-42	-0.253262	0.042	0.185	6.80201e-38	coelEpi	LTBP2
2.71188e-42	-0.268656	0.046	0.178	7.65563e-38	coelEpi	HSD17B1
2.88716e-42	0.331078	0.646	0.446	8.15047e-38	coelEpi	PBX1
2.94638e-42	-0.328504	0.101	0.267	8.31764e-38	coelEpi	PSME4
3.29936e-42	-0.512188	0.843	0.885	9.3141e-38	coelEpi	ISYNA1
3.31366e-42	0.111914	0.098	0.01	9.35447e-38	coelEpi	CFD
3.32264e-42	0.279135	0.968	0.944	9.37981e-38	coelEpi	RPL21
3.44149e-42	-0.346066	0.215	0.385	9.71534e-38	coelEpi	PJA1
4.43857e-42	-0.355373	0.181	0.352	1.25301e-37	coelEpi	DPYSL3
5.07388e-42	-0.38699	0.578	0.686	1.43236e-37	coelEpi	RAB11A
5.17439e-42	-0.322001	0.048	0.175	1.46073e-37	coelEpi	SLC7A5
5.7794e-42	-0.31588	0.176	0.347	1.63153e-37	coelEpi	TTC8
5.89819e-42	-0.196808	0.01	0.122	1.66506e-37	coelEpi	IRX5
6.47078e-42	-0.349771	0.268	0.438	1.8267e-37	coelEpi	MGST2
7.16009e-42	-0.332645	0.076	0.221	2.02129e-37	coelEpi	SESN1
8.29687e-42	-0.314922	0.056	0.213	2.34221e-37	coelEpi	MT1F
9.78537e-42	0.182359	0.161	0.03	2.76241e-37	coelEpi	CRB2
1.16253e-41	-0.388162	0.859	0.9	3.28183e-37	coelEpi	PRDX2
1.18173e-41	-0.232948	0.029	0.153	3.33601e-37	coelEpi	RALYL
1.32354e-41	-0.295377	0.106	0.27	3.73634e-37	coelEpi	MYO6
1.56032e-41	-0.287876	0.092	0.239	4.40479e-37	coelEpi	ZNF714
1.72156e-41	-0.174937	0.003	0.108	4.85997e-37	coelEpi	DHH
1.73028e-41	0.335485	0.102	0.019	4.88458e-37	coelEpi	PLA2G2A
1.81883e-41	-0.332012	0.089	0.252	5.13456e-37	coelEpi	VEGFA
1.82581e-41	-0.340158	0.002	0.096	5.15426e-37	coelEpi	PRND
2.11582e-41	0.300204	0.799	0.66	5.97296e-37	coelEpi	ALKBH7
2.30283e-41	-0.341758	0.95	0.963	6.50088e-37	coelEpi	LAPTM4A
2.34063e-41	0.29274	0.465	0.255	6.6076e-37	coelEpi	SIGIRR
2.41624e-41	0.212321	0.187	0.048	6.82104e-37	coelEpi	APCDD1
2.86169e-41	0.28948	0.311	0.134	8.07854e-37	coelEpi	BOC
2.86336e-41	-0.265274	0.017	0.136	8.08327e-37	coelEpi	CCL21
3.02069e-41	0.11518	0.105	0.012	8.52739e-37	coelEpi	PLPPR3
3.90011e-41	0.292809	0.303	0.114	1.101e-36	coelEpi	ITGA3
4.14663e-41	-0.432409	0.929	0.955	1.17059e-36	coelEpi	MT-ATP8
4.22772e-41	0.268811	0.903	0.807	1.19349e-36	coelEpi	OSTC
6.11001e-41	-0.176035	0.007	0.122	1.72486e-36	coelEpi	MTCP1
6.49476e-41	-0.361811	0.41	0.574	1.83347e-36	coelEpi	DYNC1H1
7.00379e-41	0.165772	0.17	0.034	1.97717e-36	coelEpi	GRB10
7.52872e-41	0.219972	0.244	0.066	2.12536e-36	coelEpi	DHRS3
8.53338e-41	0.312347	0.408	0.218	2.40897e-36	coelEpi	CAVIN3
9.83348e-41	0.300463	0.438	0.237	2.77599e-36	coelEpi	TNFRSF1A
1.01477e-40	0.214909	0.229	0.072	2.8647e-36	coelEpi	MYO1C
1.01661e-40	0.144609	0.105	0.015	2.86988e-36	coelEpi	GFPT2
1.21446e-40	0.306798	0.622	0.439	3.42842e-36	coelEpi	FKBP10
1.21532e-40	-0.292455	0.124	0.293	3.43086e-36	coelEpi	CRTC3
1.44368e-40	-0.217269	0.028	0.161	4.07552e-36	coelEpi	ABO
2.09613e-40	0.186543	0.155	0.034	5.91738e-36	coelEpi	BST1
2.35373e-40	0.250826	0.31	0.125	6.64457e-36	coelEpi	LAMA5
2.38185e-40	-0.404128	0.622	0.718	6.72395e-36	coelEpi	TMEM50A
2.43928e-40	0.218794	0.226	0.06	6.88608e-36	coelEpi	EDNRA
2.47432e-40	0.246574	0.302	0.122	6.985e-36	coelEpi	GPRC5C
2.69874e-40	0.231676	0.297	0.122	7.61856e-36	coelEpi	AGPAT2
3.20437e-40	-0.75636	0.492	0.665	9.04592e-36	coelEpi	NPY
3.33074e-40	-0.305724	0.094	0.242	9.40267e-36	coelEpi	B4GALT1
3.51282e-40	0.114927	0.086	0.009	9.91669e-36	coelEpi	HHIPL1
4.71228e-40	-0.495799	0.383	0.503	1.33028e-35	coelEpi	TM7SF2
4.94393e-40	-0.425747	0.483	0.624	1.39567e-35	coelEpi	PPA1
5.65849e-40	-0.211006	0.016	0.128	1.59739e-35	coelEpi	NR0B1
5.74514e-40	0.135847	0.131	0.02	1.62185e-35	coelEpi	MAL2
5.85343e-40	-0.271493	0.006	0.105	1.65242e-35	coelEpi	SORL1
6.11271e-40	-0.177669	0.006	0.11	1.72562e-35	coelEpi	CYP26B1
6.90519e-40	0.265493	0.21	0.071	1.94933e-35	coelEpi	EFEMP1
7.01612e-40	-0.327222	0.171	0.342	1.98065e-35	coelEpi	DMD
7.91303e-40	-0.330901	0.133	0.287	2.23385e-35	coelEpi	CUL4B
8.7297e-40	0.302996	0.43	0.245	2.46439e-35	coelEpi	SNHG18
8.80271e-40	-0.250659	0.038	0.166	2.48501e-35	coelEpi	SLC6A8
1.30533e-39	-0.291515	0.103	0.252	3.68494e-35	coelEpi	TRIB2
1.41987e-39	0.291952	0.659	0.444	4.00829e-35	coelEpi	CPXM1
1.59077e-39	-0.24896	0.055	0.19	4.49075e-35	coelEpi	KCNIP4
1.79739e-39	-0.369075	0.196	0.374	5.07403e-35	coelEpi	SERPINB9
1.81248e-39	0.178533	0.125	0.023	5.11662e-35	coelEpi	MEDAG
2.04239e-39	-0.325324	0.243	0.414	5.76566e-35	coelEpi	HSDL2
2.70129e-39	-1.2597	0.054	0.175	7.62574e-35	coelEpi	CITED1
3.25375e-39	-0.276647	0.069	0.218	9.18535e-35	coelEpi	STK17A
3.68983e-39	-0.375866	0.292	0.446	1.04164e-34	coelEpi	PSMD9
4.11285e-39	-0.234839	0.011	0.118	1.16106e-34	coelEpi	TNFRSF1B
4.15296e-39	-0.272566	0.103	0.265	1.17238e-34	coelEpi	TRIM24
4.35157e-39	-0.29704	0.147	0.321	1.22845e-34	coelEpi	REV3L
4.48961e-39	0.240716	0.249	0.084	1.26742e-34	coelEpi	CDC42EP5
5.63827e-39	-0.279334	0.004	0.101	1.59168e-34	coelEpi	TRIM55
7.57602e-39	0.177925	0.998	0.991	2.13871e-34	coelEpi	RPS18
8.66402e-39	-0.274421	0.077	0.231	2.44585e-34	coelEpi	AK4
9.08567e-39	0.29077	0.475	0.266	2.56488e-34	coelEpi	RASSF7
1.06069e-38	0.196751	0.993	0.978	2.99433e-34	coelEpi	RPS21
1.08703e-38	-0.272342	0.103	0.258	3.06869e-34	coelEpi	CHD7
1.18458e-38	-0.25467	0.056	0.199	3.34406e-34	coelEpi	PFKFB3
1.26367e-38	-0.456867	0.137	0.271	3.56734e-34	coelEpi	RASL11B
1.73135e-38	-0.348148	0.272	0.433	4.8876e-34	coelEpi	TCAF1
2.25097e-38	0.551639	0.46	0.291	6.35449e-34	coelEpi	RPS4Y1
2.25643e-38	0.222316	0.238	0.084	6.36989e-34	coelEpi	INAFM1
2.3357e-38	-0.222751	0.015	0.128	6.59367e-34	coelEpi	DMRT1
2.60304e-38	0.326018	0.661	0.453	7.3484e-34	coelEpi	ARL4A
2.69811e-38	-0.331673	0.125	0.28	7.61676e-34	coelEpi	EPCAM
3.21577e-38	0.151347	1	0.996	9.07813e-34	coelEpi	RPLP1
3.24505e-38	0.600951	0.418	0.207	9.16077e-34	coelEpi	CTGF
3.2536e-38	-0.222013	0.024	0.143	9.18492e-34	coelEpi	SLC12A5
3.55242e-38	-0.188668	0.014	0.13	1.00285e-33	coelEpi	ABAT
3.82205e-38	0.278783	0.726	0.533	1.07897e-33	coelEpi	SYPL1
4.36076e-38	0.276194	0.553	0.347	1.23104e-33	coelEpi	RBFOX2
5.08893e-38	0.177793	0.109	0.017	1.43661e-33	coelEpi	RGS6
5.11882e-38	-0.176469	0.01	0.114	1.44504e-33	coelEpi	SALL1
5.95231e-38	-0.404507	0.269	0.436	1.68034e-33	coelEpi	ARL4D
6.58336e-38	-0.162747	0.004	0.091	1.85848e-33	coelEpi	MLC1
6.74747e-38	0.120718	0.11	0.014	1.90481e-33	coelEpi	NGFR
6.80355e-38	0.229572	0.284	0.121	1.92064e-33	coelEpi	CRYL1
7.09994e-38	-0.343654	0.256	0.405	2.00431e-33	coelEpi	PNMA1
7.50129e-38	0.139688	0.139	0.023	2.11761e-33	coelEpi	C16orf74
7.88051e-38	-0.238061	0.039	0.167	2.22467e-33	coelEpi	KIF1A
1.01629e-37	0.168347	0.135	0.029	2.86899e-33	coelEpi	GCK
1.03852e-37	-0.342513	0.024	0.14	2.93175e-33	coelEpi	IFI44L
1.07097e-37	0.554021	0.676	0.562	3.02336e-33	coelEpi	CYSTM1
1.27305e-37	-0.189826	0.006	0.104	3.59382e-33	coelEpi	KIF5C
1.63618e-37	-0.294275	0.114	0.267	4.61894e-33	coelEpi	SETDB2
1.6629e-37	-0.256016	0.014	0.115	4.69436e-33	coelEpi	ENHO
1.8689e-37	-0.173637	0.012	0.117	5.27591e-33	coelEpi	PGBD5
2.46643e-37	-0.697863	0.487	0.598	6.96273e-33	coelEpi	SERPINF1
2.60352e-37	-0.247947	0.057	0.199	7.34973e-33	coelEpi	ELMO1
2.89518e-37	-0.245694	0.082	0.234	8.1731e-33	coelEpi	AQP11
3.10534e-37	0.169985	0.197	0.057	8.76636e-33	coelEpi	TAF9B
3.10551e-37	0.304923	0.809	0.698	8.76686e-33	coelEpi	SERPINH1
3.46819e-37	-0.333009	0.117	0.258	9.79069e-33	coelEpi	PTBP3
3.71769e-37	0.232583	0.296	0.123	1.0495e-32	coelEpi	CTSH
5.17162e-37	-0.30169	0.176	0.339	1.45995e-32	coelEpi	TMEM245
5.88238e-37	-0.226745	0.032	0.155	1.6606e-32	coelEpi	FGD4
6.0322e-37	-0.225704	0.029	0.143	1.70289e-32	coelEpi	GBP4
6.2703e-37	0.1569	0.146	0.027	1.77011e-32	coelEpi	C1QTNF1
6.66045e-37	-0.327282	0.211	0.37	1.88024e-32	coelEpi	FN3K
7.43966e-37	-0.312933	0.151	0.313	2.10022e-32	coelEpi	NEFH
7.52554e-37	0.214142	0.226	0.075	2.12446e-32	coelEpi	WDPCP
8.57106e-37	-0.293301	0.086	0.235	2.41961e-32	coelEpi	FILIP1L
1.09896e-36	0.295574	0.727	0.571	3.10237e-32	coelEpi	RNH1
1.37754e-36	-0.208403	0.031	0.154	3.8888e-32	coelEpi	VAV2
1.53041e-36	-0.200255	0.036	0.152	4.32034e-32	coelEpi	PAK3
1.59573e-36	-0.349317	0.573	0.692	4.50475e-32	coelEpi	ANP32A
1.82972e-36	0.130848	0.133	0.021	5.1653e-32	coelEpi	RARG
1.87782e-36	-0.264778	0.092	0.237	5.30108e-32	coelEpi	DENND5B
2.11817e-36	0.204807	0.982	0.981	5.97959e-32	coelEpi	HNRNPA1
2.52543e-36	-0.30093	0.18	0.336	7.12928e-32	coelEpi	MED31
2.68124e-36	-0.286564	0.165	0.323	7.56914e-32	coelEpi	RWDD4
3.39858e-36	-0.211037	0.039	0.158	9.5942e-32	coelEpi	ZBTB40
3.81056e-36	0.253824	0.295	0.14	1.07572e-31	coelEpi	MARVELD1
3.85045e-36	0.262519	0.438	0.249	1.08698e-31	coelEpi	TMBIM1
4.51825e-36	-0.264019	0.1	0.246	1.2755e-31	coelEpi	LCA5
4.72009e-36	-0.213459	0.027	0.148	1.33248e-31	coelEpi	ETV5
4.73455e-36	0.293546	0.425	0.234	1.33656e-31	coelEpi	PAWR
4.85132e-36	-0.411595	0.673	0.775	1.36953e-31	coelEpi	LAPTM4B
5.17579e-36	0.606886	0.855	0.762	1.46113e-31	coelEpi	FOS
5.23321e-36	-0.213941	0.05	0.181	1.47734e-31	coelEpi	JAZF1
5.96579e-36	0.195003	0.223	0.074	1.68414e-31	coelEpi	EML3
6.0549e-36	-0.543222	0.983	0.985	1.7093e-31	coelEpi	MT-ND4
6.18511e-36	-0.330472	0.385	0.54	1.74606e-31	coelEpi	ALDH9A1
6.66867e-36	-0.315822	0.87	0.905	1.88257e-31	coelEpi	COX5B
7.87158e-36	-0.183731	0.019	0.128	2.22215e-31	coelEpi	TP53INP2
8.67745e-36	-0.295896	0.137	0.304	2.44964e-31	coelEpi	ITPR2
9.38601e-36	-0.292211	0.262	0.426	2.64967e-31	coelEpi	MICU1
9.73466e-36	-0.339376	0.463	0.601	2.74809e-31	coelEpi	USP22
1.07326e-35	-0.278317	0.144	0.299	3.02982e-31	coelEpi	WFS1
1.12231e-35	-0.305809	0.185	0.346	3.16829e-31	coelEpi	CBLB
1.14016e-35	0.138718	0.095	0.011	3.21866e-31	coelEpi	HOXA9
1.45218e-35	0.111574	0.121	0.022	4.0995e-31	coelEpi	TEAD4
1.54837e-35	-0.164577	0.006	0.096	4.37104e-31	coelEpi	BMPR1B
1.58253e-35	-0.431979	0.374	0.492	4.46749e-31	coelEpi	RDX
1.65444e-35	-0.301384	0.273	0.437	4.67049e-31	coelEpi	UBA1
1.95692e-35	-0.352809	0.417	0.563	5.52438e-31	coelEpi	AFF4
2.12529e-35	0.256997	0.887	0.816	5.99969e-31	coelEpi	EIF3E
2.14548e-35	-0.704864	0.214	0.332	6.05668e-31	coelEpi	LYPD1
2.45443e-35	-0.2174	0.05	0.18	6.92886e-31	coelEpi	SEMA4G
2.54028e-35	0.257333	0.33	0.145	7.17122e-31	coelEpi	AGRN
2.55879e-35	-0.392486	0.538	0.655	7.22347e-31	coelEpi	ATP1A1
3.08787e-35	0.253439	0.309	0.138	8.71706e-31	coelEpi	GSDME
3.23509e-35	-0.215737	0.006	0.098	9.13267e-31	coelEpi	PHF24
3.74467e-35	-0.357125	0.022	0.135	1.05712e-30	coelEpi	REG3G
3.83702e-35	0.120632	0.119	0.019	1.08319e-30	coelEpi	LPAR5
3.97286e-35	-0.27993	0.157	0.318	1.12154e-30	coelEpi	UBA6
4.25936e-35	0.351481	0.671	0.539	1.20242e-30	coelEpi	NAXE
4.32448e-35	0.145797	0.119	0.023	1.2208e-30	coelEpi	GPR63
4.37364e-35	0.112607	0.111	0.016	1.23468e-30	coelEpi	PCDHAC2
5.70521e-35	0.240172	0.446	0.238	1.61058e-30	coelEpi	FKBP7
5.74242e-35	-0.231339	0.05	0.188	1.62109e-30	coelEpi	ZNF275
5.75976e-35	-0.325605	0.199	0.356	1.62598e-30	coelEpi	CDH2
6.13521e-35	-0.278915	0.123	0.268	1.73197e-30	coelEpi	ST3GAL4
7.6529e-35	0.148945	0.148	0.032	2.16041e-30	coelEpi	SNCAIP
8.30308e-35	0.260064	0.359	0.18	2.34396e-30	coelEpi	GATA5
8.34716e-35	-0.320393	0.612	0.757	2.3564e-30	coelEpi	H1F0
9.76669e-35	0.133082	0.136	0.031	2.75714e-30	coelEpi	CORO1A
9.90929e-35	-0.20697	0.016	0.121	2.79739e-30	coelEpi	NOSTRIN
1.07657e-34	0.100922	0.085	0.008	3.03915e-30	coelEpi	JDP2
1.08677e-34	0.26801	0.526	0.314	3.06794e-30	coelEpi	SH3BP5
1.14619e-34	0.24469	0.343	0.158	3.2357e-30	coelEpi	C9orf3
1.24093e-34	-0.355003	0.902	0.93	3.50315e-30	coelEpi	DYNLL1
1.36447e-34	-0.362685	0.14	0.273	3.85191e-30	coelEpi	SCARB1
1.54422e-34	-0.322153	0.42	0.561	4.35933e-30	coelEpi	EPN1
1.75852e-34	0.241188	0.683	0.457	4.96431e-30	coelEpi	DMKN
2.29463e-34	0.322579	0.637	0.434	6.47773e-30	coelEpi	PROCR
2.39101e-34	0.270694	0.621	0.431	6.74981e-30	coelEpi	CALU
2.59884e-34	-0.272052	0.264	0.433	7.33653e-30	coelEpi	GNB1
2.65854e-34	-0.382811	0.729	0.793	7.50506e-30	coelEpi	ATP5IF1
2.99393e-34	-0.323082	0.216	0.373	8.45186e-30	coelEpi	ROBO1
3.08641e-34	-0.158418	0.003	0.089	8.71294e-30	coelEpi	FOXL2NB
3.26454e-34	-0.336872	0.576	0.688	9.21578e-30	coelEpi	AES
3.45714e-34	-0.201373	0.01	0.102	9.75951e-30	coelEpi	CLDN3
3.62005e-34	0.12521	0.109	0.013	1.02194e-29	coelEpi	TNNT2
5.14151e-34	0.151303	0.996	0.989	1.45145e-29	coelEpi	RPS15
5.25024e-34	-0.212482	0.047	0.166	1.48214e-29	coelEpi	CAPN5
5.46467e-34	0.424714	0.435	0.264	1.54268e-29	coelEpi	CRABP2
5.999e-34	-0.1676	0.011	0.097	1.69352e-29	coelEpi	EML5
7.04732e-34	0.136257	0.127	0.025	1.98946e-29	coelEpi	COBLL1
7.11621e-34	-0.309853	0.243	0.395	2.00891e-29	coelEpi	CMTM3
7.99306e-34	0.231477	0.902	0.832	2.25644e-29	coelEpi	PABPC1
8.34638e-34	0.145489	0.997	0.992	2.35618e-29	coelEpi	RPL18
9.11871e-34	-0.27724	0.129	0.267	2.57421e-29	coelEpi	LGR4
1.28081e-33	-0.275448	0.104	0.243	3.61574e-29	coelEpi	MYLIP
1.31177e-33	-0.395441	0.348	0.476	3.70313e-29	coelEpi	GSTA4
1.58056e-33	-0.43201	0.064	0.185	4.46191e-29	coelEpi	MT1E
1.77272e-33	-0.408914	0.012	0.113	5.00438e-29	coelEpi	NDUFA4L2
1.80563e-33	-0.25572	0.086	0.216	5.09728e-29	coelEpi	A4GALT
2.16488e-33	-0.210473	0.045	0.166	6.11144e-29	coelEpi	TMEM26
2.1805e-33	-0.256034	0.093	0.228	6.15555e-29	coelEpi	CEP192
2.2183e-33	-0.210671	0.065	0.197	6.26227e-29	coelEpi	GBE1
2.3198e-33	-0.286189	0.174	0.341	6.5488e-29	coelEpi	KLHDC8A
2.51739e-33	-0.181003	0.021	0.126	7.10659e-29	coelEpi	RGN
2.56426e-33	0.383455	0.757	0.628	7.23891e-29	coelEpi	H1FX
3.22015e-33	0.259323	0.422	0.232	9.09049e-29	coelEpi	NR3C1
3.26643e-33	-0.300129	0.05	0.156	9.22113e-29	coelEpi	SLC1A3
3.52519e-33	-0.287239	0.25	0.408	9.95161e-29	coelEpi	CDKN1B
3.5709e-33	-0.247585	0.764	0.869	1.00807e-28	coelEpi	B2M
3.797e-33	-0.293236	0.231	0.372	1.07189e-28	coelEpi	CUL1
4.05962e-33	-0.249932	0.03	0.14	1.14603e-28	coelEpi	NEDD9
5.36422e-33	-0.371855	0.385	0.509	1.51432e-28	coelEpi	REXO2
5.99627e-33	-0.185706	0.015	0.114	1.69275e-28	coelEpi	NRCAM
7.64452e-33	0.20118	0.252	0.068	2.15805e-28	coelEpi	MMP28
8.00298e-33	0.227163	0.24	0.084	2.25924e-28	coelEpi	PDGFRL
8.31373e-33	0.228052	0.941	0.872	2.34697e-28	coelEpi	HSPB1
9.04036e-33	0.159835	0.186	0.053	2.55209e-28	coelEpi	CLUL1
1.01892e-32	-0.199321	0.04	0.156	2.87641e-28	coelEpi	JAKMIP2
1.02092e-32	-0.304459	0.334	0.476	2.88205e-28	coelEpi	HSD17B12
1.06231e-32	0.274642	0.601	0.399	2.99891e-28	coelEpi	SCG5
1.12675e-32	-0.244131	0.092	0.228	3.18082e-28	coelEpi	BCAR3
1.26481e-32	-0.280749	0.042	0.146	3.57056e-28	coelEpi	CNTFR
1.60438e-32	-0.272145	0.076	0.211	4.52916e-28	coelEpi	CAB39L
1.67678e-32	-0.236007	0.067	0.183	4.73356e-28	coelEpi	CCDC183
1.68208e-32	-0.28976	0.176	0.314	4.74852e-28	coelEpi	SLMAP
1.8048e-32	0.153419	0.125	0.027	5.09495e-28	coelEpi	LINC01638
2.15312e-32	-0.233261	0.07	0.202	6.07825e-28	coelEpi	SOGA1
2.1622e-32	0.215338	0.31	0.145	6.10389e-28	coelEpi	RABEPK
2.22492e-32	-0.230234	0.047	0.163	6.28094e-28	coelEpi	SLC41A1
2.35579e-32	-0.241026	0.084	0.223	6.65041e-28	coelEpi	ZC3HAV1
2.77964e-32	-0.1786	0.03	0.141	7.84692e-28	coelEpi	MCF2L2
3.7228e-32	-0.192536	0.033	0.14	1.05095e-27	coelEpi	ZCCHC14
4.13157e-32	-0.123086	0.004	0.088	1.16634e-27	coelEpi	TRG-AS1
4.44002e-32	-0.382721	0.428	0.543	1.25342e-27	coelEpi	MAP1LC3A
4.72511e-32	-0.264372	0.097	0.236	1.3339e-27	coelEpi	INSR
5.00401e-32	-0.336804	0.057	0.165	1.41263e-27	coelEpi	GNG7
5.65586e-32	0.209688	0.978	0.948	1.59665e-27	coelEpi	PPDPF
6.20831e-32	-0.134183	0.006	0.099	1.75261e-27	coelEpi	LINC01426
6.37355e-32	-0.167352	0.015	0.114	1.79925e-27	coelEpi	MAMLD1
7.34829e-32	-0.553653	0.195	0.314	2.07442e-27	coelEpi	VCAN
8.10626e-32	0.243119	0.44	0.239	2.2884e-27	coelEpi	SEZ6L2
8.60945e-32	-0.302618	0.158	0.302	2.43045e-27	coelEpi	PLXDC2
9.4131e-32	0.56884	0.495	0.335	2.65732e-27	coelEpi	ID3
1.10564e-31	-0.172772	0.015	0.113	3.12122e-27	coelEpi	TMPRSS9
1.11941e-31	0.260991	0.697	0.532	3.1601e-27	coelEpi	EPB41L4A-AS1
1.2186e-31	-0.209531	0.031	0.138	3.4401e-27	coelEpi	LIMCH1
1.26942e-31	0.201775	0.322	0.152	3.58357e-27	coelEpi	BAIAP2
1.44662e-31	-0.227186	0.086	0.214	4.08382e-27	coelEpi	SNX18
1.44721e-31	-0.224617	0.052	0.176	4.08546e-27	coelEpi	PDK3
1.48358e-31	0.288528	0.338	0.188	4.18814e-27	coelEpi	PLSCR4
1.54013e-31	0.159341	0.991	0.98	4.34778e-27	coelEpi	FAU
1.74927e-31	-0.228086	0.072	0.194	4.93818e-27	coelEpi	USP6NL
1.94707e-31	0.170954	0.202	0.071	5.49658e-27	coelEpi	NQO1
2.02304e-31	-0.32831	0.575	0.675	5.71103e-27	coelEpi	TECR
2.25131e-31	-0.154086	0.011	0.102	6.35544e-27	coelEpi	UNC80
2.26206e-31	-0.34776	0.491	0.61	6.38581e-27	coelEpi	KDM5B
2.28688e-31	0.242881	0.407	0.22	6.45586e-27	coelEpi	AFDN
2.30735e-31	-0.25813	0.106	0.227	6.51365e-27	coelEpi	SH3RF1
2.57949e-31	-0.295146	0.015	0.115	7.28189e-27	coelEpi	C11orf96
2.66704e-31	0.234484	0.301	0.127	7.52905e-27	coelEpi	PDGFC
2.7508e-31	-0.208812	0.034	0.141	7.76552e-27	coelEpi	SEMA6C
2.96562e-31	-0.244695	0.069	0.196	8.37196e-27	coelEpi	CPVL
3.35958e-31	0.16384	0.185	0.058	9.48408e-27	coelEpi	HOXC6
3.37345e-31	0.225283	0.293	0.145	9.52325e-27	coelEpi	RAC2
3.60747e-31	-0.154585	0.015	0.108	1.01839e-26	coelEpi	UBE2QL1
3.63308e-31	-0.201294	0.05	0.159	1.02562e-26	coelEpi	ME3
4.31677e-31	0.220717	0.271	0.118	1.21862e-26	coelEpi	RHOU
4.91705e-31	-0.170331	0.011	0.101	1.38808e-26	coelEpi	HMOX1
5.52326e-31	-0.201329	0.045	0.161	1.55922e-26	coelEpi	GRM7
5.80093e-31	-0.219061	0.09	0.211	1.6376e-26	coelEpi	CHKA
6.69326e-31	-0.331489	0.477	0.601	1.88951e-26	coelEpi	PNPLA2
6.98372e-31	-0.287131	0.137	0.261	1.97151e-26	coelEpi	SORD
7.42125e-31	-0.383743	0.6	0.698	2.09502e-26	coelEpi	HLA-A
7.56789e-31	-0.295562	0.154	0.295	2.13641e-26	coelEpi	PLEKHH2
8.12697e-31	0.192775	0.972	0.946	2.29424e-26	coelEpi	RPL4
8.45193e-31	-0.546957	0.018	0.114	2.38598e-26	coelEpi	FATE1
8.82004e-31	0.205954	0.246	0.088	2.4899e-26	coelEpi	TUBB6
9.45897e-31	0.108927	0.093	0.015	2.67027e-26	coelEpi	LRRTM3
1.0029e-30	-0.231166	0.06	0.176	2.83119e-26	coelEpi	ATRNL1
1.25378e-30	0.116779	0.127	0.024	3.53943e-26	coelEpi	B3GNT9
1.27938e-30	0.263674	0.465	0.279	3.61169e-26	coelEpi	PALLD
1.30929e-30	0.16025	0.986	0.965	3.69612e-26	coelEpi	RPSA
1.43984e-30	-0.325252	0.528	0.655	4.06468e-26	coelEpi	SMS
1.62243e-30	0.259031	0.636	0.479	4.58012e-26	coelEpi	TMEM219
1.73205e-30	0.127379	0.136	0.03	4.88958e-26	coelEpi	KCTD14
1.79357e-30	0.119043	0.124	0.026	5.06325e-26	coelEpi	HOXC5
1.80533e-30	-0.180018	0.036	0.146	5.09646e-26	coelEpi	ARHGAP26
1.94157e-30	-0.230519	0.051	0.171	5.48105e-26	coelEpi	FAM122C
1.94665e-30	-0.19082	0.037	0.144	5.49539e-26	coelEpi	MAPKAPK2
2.06209e-30	-0.20546	0.021	0.112	5.82129e-26	coelEpi	ITGA2
2.07519e-30	0.215611	0.321	0.151	5.85825e-26	coelEpi	HSBP1L1
2.27646e-30	0.358841	0.667	0.586	6.42644e-26	coelEpi	CD81
2.52242e-30	0.125575	0.118	0.023	7.12078e-26	coelEpi	ADAMTS2
2.52901e-30	-0.217039	0.04	0.151	7.13941e-26	coelEpi	FYB2
2.86355e-30	-0.275783	0.034	0.126	8.08381e-26	coelEpi	ADGRG1
3.72062e-30	0.21933	0.309	0.143	1.05033e-25	coelEpi	DSE
3.92819e-30	0.16746	0.216	0.078	1.10893e-25	coelEpi	ST6GALNAC3
4.10412e-30	-0.156802	0.009	0.092	1.15859e-25	coelEpi	PCSK6
5.34561e-30	0.177236	0.952	0.837	1.50907e-25	coelEpi	LY6E
5.37434e-30	-0.313129	0.52	0.633	1.51718e-25	coelEpi	TIMM8B
5.37525e-30	-0.307367	0.46	0.581	1.51743e-25	coelEpi	RAD23B
5.40199e-30	0.169833	0.171	0.055	1.52498e-25	coelEpi	CNTN6
5.8149e-30	0.151625	0.113	0.025	1.64155e-25	coelEpi	CGN
6.4941e-30	-0.262722	0.153	0.287	1.83328e-25	coelEpi	TSKU
6.6006e-30	-0.248683	0.055	0.168	1.86335e-25	coelEpi	STXBP6
7.20903e-30	-0.31641	0.644	0.754	2.03511e-25	coelEpi	SPRR2F
8.10188e-30	0.211932	0.293	0.136	2.28716e-25	coelEpi	QPRT
8.59518e-30	0.153935	0.999	0.99	2.42642e-25	coelEpi	RPS28
9.13087e-30	-0.347103	0.263	0.388	2.57765e-25	coelEpi	MAP1B
9.86397e-30	0.097272	0.087	0.013	2.7846e-25	coelEpi	KCNN3
1.07686e-29	-0.226154	0.074	0.205	3.03998e-25	coelEpi	ZEB2
1.23869e-29	-0.241885	0.068	0.185	3.49681e-25	coelEpi	NAT8L
1.25244e-29	-0.292642	0.36	0.497	3.53563e-25	coelEpi	DDB1
1.35486e-29	0.261383	0.759	0.631	3.82476e-25	coelEpi	NDN
1.35554e-29	-0.246025	0.07	0.199	3.82669e-25	coelEpi	UTF1
1.51159e-29	0.243716	0.309	0.146	4.26721e-25	coelEpi	GRB7
1.67095e-29	-0.183845	0.04	0.148	4.71708e-25	coelEpi	SLC8B1
1.8285e-29	0.179434	0.175	0.058	5.16184e-25	coelEpi	KLF5
2.20742e-29	-0.320474	0.46	0.568	6.23155e-25	coelEpi	CCS
2.25528e-29	-0.286052	0.31	0.457	6.36666e-25	coelEpi	CLTC
2.4916e-29	-0.212178	0.061	0.172	7.0338e-25	coelEpi	IL13RA1
2.94254e-29	-0.208665	0.078	0.198	8.30678e-25	coelEpi	CKAP2
3.19637e-29	-0.295769	0.311	0.465	9.02335e-25	coelEpi	KMT2C
3.36409e-29	-0.211929	0.049	0.159	9.49684e-25	coelEpi	ANOS1
4.02963e-29	-0.183493	0.055	0.158	1.13757e-24	coelEpi	SBK1
4.1466e-29	-0.19243	0.063	0.176	1.17058e-24	coelEpi	ENTPD6
4.33378e-29	0.239963	0.672	0.504	1.22343e-24	coelEpi	FCGRT
4.62554e-29	0.152313	0.11	0.026	1.30579e-24	coelEpi	MRAP2
4.99523e-29	-0.249243	0.146	0.279	1.41015e-24	coelEpi	GTF3C1
5.12727e-29	-0.27195	0.202	0.343	1.44743e-24	coelEpi	CKAP5
5.6282e-29	0.19869	0.923	0.866	1.58884e-24	coelEpi	SLC25A3
5.85034e-29	-0.235361	0.073	0.185	1.65155e-24	coelEpi	XPR1
6.7925e-29	-0.267298	0.204	0.338	1.91752e-24	coelEpi	CREM
7.91678e-29	-0.285731	0.171	0.302	2.23491e-24	coelEpi	REL
8.17267e-29	-0.12332	0.006	0.083	2.30714e-24	coelEpi	GGT6
8.27488e-29	-0.242979	0.114	0.241	2.336e-24	coelEpi	PLEKHG1
9.16005e-29	-0.218485	0.04	0.159	2.58588e-24	coelEpi	LHX2
9.19309e-29	-0.284649	0.228	0.359	2.59521e-24	coelEpi	NBPF14
1.3566e-28	-0.251498	0.122	0.247	3.82968e-24	coelEpi	FMNL2
1.56811e-28	-0.347704	0.161	0.27	4.42676e-24	coelEpi	NUDT10
2.39304e-28	0.126917	0.083	0.011	6.75554e-24	coelEpi	GBP1
2.41145e-28	0.120026	0.086	0.013	6.80753e-24	coelEpi	MYOF
2.45597e-28	-0.196567	0.081	0.204	6.93319e-24	coelEpi	MKNK1
2.69742e-28	-0.336164	0.635	0.714	7.61482e-24	coelEpi	PGAM1
2.76322e-28	-0.221342	0.084	0.206	7.80056e-24	coelEpi	GLCE
3.07988e-28	0.191638	0.974	0.939	8.69451e-24	coelEpi	ZFP36L1
3.17219e-28	-0.309086	0.181	0.311	8.95511e-24	coelEpi	BCAT1
3.35632e-28	0.186637	0.204	0.071	9.47488e-24	coelEpi	TGFB2
3.45784e-28	-0.27375	0.564	0.666	9.76147e-24	coelEpi	NDUFA6
4.02635e-28	-0.227123	0.096	0.221	1.13664e-23	coelEpi	RUFY3
4.16351e-28	0.116127	0.098	0.02	1.17536e-23	coelEpi	IL1RAP
4.49921e-28	0.136242	0.102	0.021	1.27013e-23	coelEpi	LEPR
4.8566e-28	0.191063	0.337	0.154	1.37102e-23	coelEpi	STMN3
4.9746e-28	0.108397	0.094	0.011	1.40433e-23	coelEpi	CLCF1
5.65621e-28	0.271513	0.51	0.35	1.59675e-23	coelEpi	UGP2
6.81716e-28	-0.241185	0.116	0.247	1.92448e-23	coelEpi	KLHL4
7.16119e-28	-0.349327	0.542	0.648	2.02161e-23	coelEpi	PABPN1
8.35069e-28	0.216833	0.952	0.924	2.3574e-23	coelEpi	HMGN2
8.75784e-28	0.298714	0.319	0.216	2.47234e-23	coelEpi	GSTM1
9.39522e-28	-0.130981	0.009	0.094	2.65227e-23	coelEpi	C1orf141
1.00662e-27	0.236068	0.887	0.84	2.84168e-23	coelEpi	KDELR1
1.06274e-27	-0.164797	0.007	0.081	3.00012e-23	coelEpi	THEMIS2
1.07262e-27	0.243005	0.737	0.604	3.02801e-23	coelEpi	RBM3
1.16451e-27	-0.278181	0.035	0.119	3.28742e-23	coelEpi	CLEC18B
1.17089e-27	0.232649	0.474	0.287	3.30544e-23	coelEpi	CLIC4
1.23593e-27	-0.335408	0.991	0.988	3.48902e-23	coelEpi	MT-ATP6
1.26443e-27	-0.255564	0.032	0.117	3.56947e-23	coelEpi	CLDN11
1.29332e-27	-0.372049	0.261	0.389	3.65106e-23	coelEpi	CKS2
1.36787e-27	-0.235314	0.114	0.233	3.8615e-23	coelEpi	BCAS3
1.41015e-27	-0.1589	0.02	0.109	3.98085e-23	coelEpi	USP31
1.47337e-27	0.14698	0.994	0.974	4.15932e-23	coelEpi	RPL23A
1.47942e-27	-0.243907	0.175	0.318	4.17639e-23	coelEpi	OSBPL8
1.52262e-27	0.132379	0.104	0.019	4.29835e-23	coelEpi	ADAMTS9
1.62302e-27	0.196802	0.377	0.202	4.58178e-23	coelEpi	ZNF330
1.74238e-27	-0.177724	0.011	0.092	4.91875e-23	coelEpi	PLP1
1.74705e-27	-0.264893	0.259	0.398	4.93193e-23	coelEpi	CELF1
1.79477e-27	-0.164113	0.024	0.112	5.06663e-23	coelEpi	FHDC1
1.84553e-27	-0.297393	0.221	0.354	5.20992e-23	coelEpi	GPC1
1.90314e-27	0.11421	0.123	0.023	5.37257e-23	coelEpi	S100A4
1.93741e-27	-0.138762	0.011	0.094	5.46932e-23	coelEpi	SCN9A
1.96175e-27	-0.272489	0.253	0.382	5.53802e-23	coelEpi	DNMT3A
2.00168e-27	0.116277	0.126	0.027	5.65073e-23	coelEpi	RND1
2.04377e-27	-0.22182	0.099	0.222	5.76955e-23	coelEpi	SH2D4A
2.06817e-27	0.196173	0.946	0.9	5.83844e-23	coelEpi	ATP5MG
2.21011e-27	-0.26077	0.087	0.206	6.23915e-23	coelEpi	CHST3
2.27885e-27	-0.33583	0.615	0.715	6.43319e-23	coelEpi	HIST1H4C
2.32001e-27	0.162708	0.221	0.076	6.54938e-23	coelEpi	COLEC12
2.42061e-27	-0.200988	0.075	0.191	6.8334e-23	coelEpi	BRPF3
2.99695e-27	0.353855	0.26	0.126	8.4604e-23	coelEpi	CLDN1
3.57851e-27	0.17079	0.23	0.09	1.01021e-22	coelEpi	FAM110B
3.86816e-27	-0.195634	0.046	0.152	1.09198e-22	coelEpi	CORO2A
4.58469e-27	-0.164722	0.038	0.136	1.29426e-22	coelEpi	PIFO
4.66614e-27	0.222775	0.689	0.534	1.31725e-22	coelEpi	AKR1A1
4.72204e-27	-0.229797	0.078	0.19	1.33303e-22	coelEpi	MET
6.0511e-27	0.201437	0.264	0.117	1.70823e-22	coelEpi	COL27A1
6.05795e-27	0.102647	0.122	0.024	1.71016e-22	coelEpi	SHB
6.08401e-27	0.208794	0.301	0.148	1.71752e-22	coelEpi	PLEKHA5
6.34385e-27	-0.160377	0.032	0.128	1.79087e-22	coelEpi	ZNF697
6.55403e-27	-0.244764	0.169	0.306	1.8502e-22	coelEpi	SETX
6.96379e-27	-0.306472	0.297	0.48	1.96588e-22	coelEpi	HOPX
7.80227e-27	-0.178358	0.026	0.126	2.20258e-22	coelEpi	PFKFB4
7.86494e-27	0.138969	0.128	0.03	2.22027e-22	coelEpi	WNT4
8.11135e-27	0.136643	0.158	0.043	2.28984e-22	coelEpi	FBLN5
8.4619e-27	-0.209082	0.038	0.132	2.38879e-22	coelEpi	DACT1
8.59817e-27	0.227798	0.45	0.276	2.42726e-22	coelEpi	GPX8
9.10858e-27	-0.28416	0.403	0.533	2.57135e-22	coelEpi	SERPINB6
9.36617e-27	-0.191831	0.057	0.159	2.64407e-22	coelEpi	APOBEC3G
9.44612e-27	-0.178726	0.044	0.15	2.66664e-22	coelEpi	TAB3
9.81414e-27	-0.220234	0.019	0.094	2.77053e-22	coelEpi	EGR3
1.05638e-26	-0.256246	0.198	0.33	2.98215e-22	coelEpi	CCDC34
1.07191e-26	0.211676	0.344	0.184	3.02601e-22	coelEpi	CA11
1.14339e-26	0.20302	0.265	0.129	3.22778e-22	coelEpi	DPYD
1.16543e-26	-0.181381	0.014	0.096	3.29e-22	coelEpi	EPHB1
1.22143e-26	-0.26763	0.537	0.647	3.4481e-22	coelEpi	PNKD
1.3304e-26	-0.295671	0.261	0.385	3.75572e-22	coelEpi	QKI
1.5216e-26	0.149704	0.164	0.052	4.29549e-22	coelEpi	NHSL1
1.55139e-26	0.118677	0.133	0.031	4.37958e-22	coelEpi	HVCN1
1.56353e-26	-0.542667	0.05	0.163	4.41385e-22	coelEpi	IFI27
1.86781e-26	0.255166	0.533	0.367	5.27282e-22	coelEpi	ADI1
1.98986e-26	-0.173876	0.042	0.155	5.61738e-22	coelEpi	LAMA2
2.39385e-26	0.116281	0.116	0.027	6.75783e-22	coelEpi	PHETA2
2.46781e-26	-0.175166	0.029	0.115	6.96661e-22	coelEpi	CAPN12
2.59712e-26	-0.169092	0.037	0.134	7.33168e-22	coelEpi	NRG1
2.69807e-26	-0.246141	0.153	0.282	7.61665e-22	coelEpi	DENND4C
2.81404e-26	0.0862618	0.088	0.013	7.94403e-22	coelEpi	HPN
2.82953e-26	0.0900979	0.089	0.013	7.98776e-22	coelEpi	PDGFB
3.14695e-26	0.137902	0.092	0.022	8.88385e-22	coelEpi	RAB7B
3.56149e-26	-0.294991	0.824	0.867	1.00541e-21	coelEpi	HMGN3
3.62494e-26	-0.215074	0.058	0.166	1.02332e-21	coelEpi	CALCRL
4.16513e-26	0.165113	0.973	0.938	1.17582e-21	coelEpi	RPL31
4.64418e-26	-0.182379	0.058	0.157	1.31105e-21	coelEpi	AC060780.1
5.48934e-26	0.181355	0.281	0.121	1.54964e-21	coelEpi	TSHZ3
5.53984e-26	-0.286363	0.547	0.642	1.5639e-21	coelEpi	ATP6V0B
5.8779e-26	-0.277255	0.5	0.61	1.65933e-21	coelEpi	VPS35
7.44753e-26	-0.19126	0.068	0.18	2.10244e-21	coelEpi	PPP1R9B
7.67557e-26	-0.223082	0.106	0.215	2.16681e-21	coelEpi	KDM3A
8.13054e-26	-0.283865	0.499	0.603	2.29525e-21	coelEpi	TMEM141
8.92069e-26	-0.252025	0.133	0.268	2.51831e-21	coelEpi	LRRC17
9.0624e-26	-0.233065	0.091	0.203	2.55832e-21	coelEpi	CPNE5
9.50433e-26	-0.208134	0.145	0.277	2.68307e-21	coelEpi	VKORC1
9.56466e-26	0.140501	0.131	0.041	2.7001e-21	coelEpi	FAM19A5
9.58953e-26	0.237719	0.518	0.326	2.70712e-21	coelEpi	LMNA
1.06465e-25	0.141181	0.161	0.049	3.00552e-21	coelEpi	RRAS
1.09635e-25	0.203042	0.422	0.245	3.095e-21	coelEpi	FAM3C
1.23998e-25	-0.269302	0.315	0.445	3.50045e-21	coelEpi	CTNND1
1.28619e-25	-0.224521	0.087	0.194	3.63091e-21	coelEpi	CMTR1
1.29033e-25	-0.265151	0.025	0.107	3.64261e-21	coelEpi	PERP
1.32153e-25	-0.195927	0.076	0.195	3.73069e-21	coelEpi	FAM111A
1.55024e-25	0.193117	0.294	0.138	4.37632e-21	coelEpi	ACTN1
1.58586e-25	-0.142534	0.029	0.122	4.47688e-21	coelEpi	CCNJL
1.60687e-25	-0.310132	0.279	0.405	4.53619e-21	coelEpi	TUBB2A
1.62747e-25	0.194731	0.295	0.133	4.59435e-21	coelEpi	ARHGEF3
1.71473e-25	-0.267222	0.477	0.597	4.84068e-21	coelEpi	UQCC2
1.81371e-25	-0.23951	0.22	0.356	5.12009e-21	coelEpi	KIAA1522
1.84714e-25	0.344132	0.191	0.048	5.21449e-21	coelEpi	TAGLN
1.84952e-25	-0.318791	0.32	0.44	5.22119e-21	coelEpi	CAV2
1.90934e-25	0.231024	0.545	0.385	5.39005e-21	coelEpi	RBMS1
2.0919e-25	0.335843	0.666	0.508	5.90542e-21	coelEpi	CAV1
2.20081e-25	-0.239455	0.106	0.229	6.21289e-21	coelEpi	TGFBR3
2.54537e-25	-0.254381	0.784	0.843	7.18559e-21	coelEpi	SELENOH
2.56895e-25	-0.192231	0.04	0.133	7.25215e-21	coelEpi	ERBB4
2.75065e-25	0.151306	0.171	0.067	7.76509e-21	coelEpi	KDELR3
2.96813e-25	-0.24878	0.143	0.262	8.37904e-21	coelEpi	KIRREL1
3.12408e-25	-0.166053	0.035	0.122	8.81927e-21	coelEpi	PNMA3
3.34656e-25	-0.249133	0.21	0.339	9.44733e-21	coelEpi	SUDS3
3.79727e-25	-0.279827	0.612	0.695	1.07197e-20	coelEpi	GADD45GIP1
4.09603e-25	-0.258012	0.684	0.774	1.15631e-20	coelEpi	H2AFZ
4.28598e-25	-0.242877	0.174	0.301	1.20993e-20	coelEpi	FHIT
4.88127e-25	-0.242128	0.155	0.28	1.37798e-20	coelEpi	ZNF738
5.22118e-25	-0.204	0.102	0.206	1.47394e-20	coelEpi	PDIA5
5.37326e-25	0.183227	0.305	0.159	1.51687e-20	coelEpi	ATP1B3
5.66722e-25	-0.171429	0.025	0.111	1.59986e-20	coelEpi	IL6R
6.32154e-25	0.220977	0.647	0.478	1.78457e-20	coelEpi	ZYX
6.43421e-25	0.104381	0.106	0.024	1.81638e-20	coelEpi	TMEM191B
6.90868e-25	-0.240193	0.179	0.301	1.95032e-20	coelEpi	PHF6
6.98259e-25	0.152391	0.209	0.079	1.97119e-20	coelEpi	SSH3
7.19154e-25	0.10117	0.082	0.011	2.03017e-20	coelEpi	EGFL6
8.17422e-25	-0.161256	0.033	0.127	2.30758e-20	coelEpi	IL1R1
8.37943e-25	-0.283844	0.228	0.358	2.36551e-20	coelEpi	TSPAN5
9.01052e-25	-0.259739	0.588	0.691	2.54367e-20	coelEpi	GTF2I
9.06585e-25	-0.249303	0.246	0.37	2.55929e-20	coelEpi	AKAP8L
9.16161e-25	0.13551	0.995	0.989	2.58632e-20	coelEpi	RPL3
9.873e-25	0.314086	0.669	0.516	2.78715e-20	coelEpi	S100A6
1.14661e-24	-0.182444	0.017	0.09	3.23689e-20	coelEpi	PRUNE2
1.15859e-24	-0.191274	0.015	0.094	3.27069e-20	coelEpi	TFF3
1.21739e-24	-0.220079	0.099	0.209	3.4367e-20	coelEpi	MLLT6
1.25681e-24	-0.27796	0.512	0.607	3.54797e-20	coelEpi	RTF1
1.29448e-24	-0.159784	0.031	0.123	3.65431e-20	coelEpi	TNIK
1.32587e-24	-0.234423	0.202	0.326	3.74292e-20	coelEpi	RNF145
1.33164e-24	-0.529692	0.791	0.786	3.75923e-20	coelEpi	LDHA
1.36534e-24	0.281277	0.312	0.179	3.85435e-20	coelEpi	GAS1
1.41323e-24	0.099274	0.106	0.025	3.98956e-20	coelEpi	TWIST2
1.48038e-24	0.209636	0.451	0.274	4.17912e-20	coelEpi	CCND3
1.61995e-24	-0.216972	0.089	0.202	4.57311e-20	coelEpi	TMEM181
1.7629e-24	-0.334385	0.138	0.244	4.97667e-20	coelEpi	GJA1
1.77065e-24	-0.20677	0.109	0.214	4.99853e-20	coelEpi	FAM118B
2.02961e-24	-0.13651	0.011	0.084	5.72959e-20	coelEpi	ANKRD6
2.06148e-24	-0.215984	0.113	0.222	5.81956e-20	coelEpi	TMEM120A
2.3963e-24	0.150045	0.963	0.92	6.76476e-20	coelEpi	GSTP1
2.44289e-24	-0.216228	0.103	0.222	6.89628e-20	coelEpi	EP300
2.49203e-24	-0.167601	0.041	0.134	7.03501e-20	coelEpi	WHRN
2.55846e-24	-0.262693	0.603	0.678	7.22253e-20	coelEpi	FAM96B
2.72701e-24	0.174785	0.943	0.899	7.69835e-20	coelEpi	SLC25A6
2.74653e-24	-0.290514	0.34	0.458	7.75347e-20	coelEpi	NOTCH2
2.83373e-24	-0.21838	0.063	0.157	7.99961e-20	coelEpi	MTSS1
3.19522e-24	-0.271998	0.398	0.506	9.0201e-20	coelEpi	PLEKHJ1
3.38508e-24	0.131743	0.136	0.039	9.55607e-20	coelEpi	BOK
3.743e-24	-0.313801	0.28	0.394	1.05665e-19	coelEpi	TRAPPC5
3.88977e-24	0.0896429	0.081	0.017	1.09808e-19	coelEpi	METTL24
4.06869e-24	-0.270859	0.899	0.919	1.14859e-19	coelEpi	PRDX6
4.21439e-24	-0.21012	0.107	0.219	1.18972e-19	coelEpi	DPYSL2
4.55485e-24	-0.243399	0.175	0.29	1.28583e-19	coelEpi	USP9X
4.83553e-24	-0.163341	0.028	0.117	1.36507e-19	coelEpi	GRAMD1B
5.4478e-24	-0.153302	0.025	0.112	1.53791e-19	coelEpi	SLC39A14
6.20113e-24	-0.161486	0.032	0.119	1.75058e-19	coelEpi	CPT1A
6.5637e-24	0.213843	0.416	0.251	1.85293e-19	coelEpi	CACNB3
7.45636e-24	0.214697	0.713	0.566	2.10493e-19	coelEpi	RSL1D1
7.53402e-24	0.353327	0.329	0.205	2.12685e-19	coelEpi	PCSK1N
7.60149e-24	-0.26121	0.285	0.412	2.1459e-19	coelEpi	ASXL1
7.65402e-24	0.121782	0.121	0.029	2.16073e-19	coelEpi	RARB
7.77588e-24	-0.184744	0.071	0.169	2.19513e-19	coelEpi	STK11
8.1671e-24	-0.254504	0.375	0.49	2.30557e-19	coelEpi	HSF1
8.23724e-24	-0.224958	0.103	0.21	2.32537e-19	coelEpi	LONRF2
8.43872e-24	-0.153839	0.029	0.117	2.38225e-19	coelEpi	MGAT5
9.01335e-24	0.203728	0.26	0.127	2.54447e-19	coelEpi	RSPO1
9.08856e-24	0.125155	0.127	0.036	2.5657e-19	coelEpi	ZNF185
9.78419e-24	-0.340285	0.738	0.785	2.76208e-19	coelEpi	FAM213A
1.05054e-23	0.153551	0.178	0.063	2.96568e-19	coelEpi	FGF9
1.0721e-23	0.0921975	0.099	0.019	3.02653e-19	coelEpi	SLC16A5
1.10982e-23	-0.272951	0.715	0.768	3.13303e-19	coelEpi	C4orf3
1.11195e-23	-0.185353	0.06	0.166	3.13903e-19	coelEpi	ARHGAP20
1.14586e-23	-0.254261	0.364	0.48	3.23477e-19	coelEpi	GTF3C6
1.17158e-23	-0.244322	0.172	0.29	3.30737e-19	coelEpi	RNF19A
1.19781e-23	-0.274461	0.273	0.404	3.3814e-19	coelEpi	KIAA1551
1.23632e-23	-0.25488	0.549	0.646	3.49014e-19	coelEpi	UQCRC1
1.46127e-23	0.21254	0.765	0.635	4.12518e-19	coelEpi	PGRMC1
1.46878e-23	0.165652	0.184	0.071	4.14636e-19	coelEpi	DOCK11
1.58591e-23	-0.309133	0.021	0.091	4.47703e-19	coelEpi	TMEM100
1.59282e-23	0.189528	0.892	0.828	4.49654e-19	coelEpi	EIF3F
1.60545e-23	-0.218026	0.219	0.353	4.5322e-19	coelEpi	ISOC1
1.6424e-23	-0.248964	0.184	0.297	4.63649e-19	coelEpi	FAT1
1.73308e-23	-0.253639	0.176	0.299	4.89248e-19	coelEpi	FREM2
1.76117e-23	-0.128475	0.026	0.11	4.97179e-19	coelEpi	DOC2A
1.87788e-23	0.0930644	0.085	0.015	5.30127e-19	coelEpi	EFNA5
2.05125e-23	-0.283953	0.307	0.431	5.79069e-19	coelEpi	PTP4A1
2.07722e-23	0.120018	0.134	0.044	5.86399e-19	coelEpi	SLC13A3
2.18636e-23	0.133585	0.177	0.061	6.17208e-19	coelEpi	CNRIP1
2.42387e-23	-0.320392	0.197	0.318	6.8426e-19	coelEpi	ANKRD37
2.50583e-23	0.183902	0.526	0.305	7.07395e-19	coelEpi	ARHGAP29
2.59757e-23	0.114345	0.144	0.045	7.33294e-19	coelEpi	SYTL1
2.72115e-23	0.204888	0.3	0.166	7.68182e-19	coelEpi	MUS81
2.74044e-23	0.188907	0.286	0.132	7.73627e-19	coelEpi	EPHB6
2.80957e-23	0.168711	0.316	0.143	7.93143e-19	coelEpi	LIMD2
2.91994e-23	-0.153351	0.05	0.15	8.24298e-19	coelEpi	MTFP1
2.93789e-23	-0.259307	0.329	0.454	8.29366e-19	coelEpi	BRD4
3.0758e-23	-0.167371	0.016	0.091	8.68299e-19	coelEpi	NKX3-1
3.10483e-23	-0.187639	0.09	0.199	8.76495e-19	coelEpi	GPT2
3.36195e-23	0.129117	0.118	0.032	9.49077e-19	coelEpi	ANKRD13B
3.48447e-23	0.200331	0.832	0.739	9.83666e-19	coelEpi	FIS1
3.65888e-23	-0.132703	0.021	0.116	1.0329e-18	coelEpi	TMEM150C
3.97416e-23	-0.209144	0.15	0.266	1.1219e-18	coelEpi	SMYD2
4.26892e-23	-0.724973	0.03	0.103	1.20512e-18	coelEpi	CYP17A1
4.35615e-23	-0.152103	0.03	0.118	1.22974e-18	coelEpi	CIART
4.42837e-23	0.240753	0.233	0.122	1.25013e-18	coelEpi	ADAMTS1
4.63142e-23	-0.316081	0.487	0.582	1.30745e-18	coelEpi	TCEAL2
5.16139e-23	-0.17702	0.075	0.18	1.45706e-18	coelEpi	ALMS1
5.30714e-23	-0.24049	0.241	0.369	1.49821e-18	coelEpi	CCDC88A
5.82567e-23	-0.240315	0.185	0.304	1.64459e-18	coelEpi	LAMB2
5.92511e-23	-0.256112	0.573	0.657	1.67266e-18	coelEpi	VDAC1
6.02448e-23	-0.175696	0.069	0.169	1.70071e-18	coelEpi	MARC2
6.05344e-23	-0.236426	0.281	0.398	1.70889e-18	coelEpi	PRRC2A
6.26818e-23	-0.184533	0.076	0.178	1.76951e-18	coelEpi	KIAA1958
6.99365e-23	-0.403965	0.302	0.462	1.97431e-18	coelEpi	IFI6
7.84972e-23	-0.266198	0.243	0.349	2.21598e-18	coelEpi	TYRO3
7.89599e-23	0.114864	0.146	0.043	2.22904e-18	coelEpi	METRN
8.46136e-23	-0.22685	0.037	0.116	2.38864e-18	coelEpi	MAP3K21
8.4938e-23	0.222521	0.592	0.442	2.3978e-18	coelEpi	RCN1
8.4973e-23	-0.225175	0.212	0.333	2.39879e-18	coelEpi	GSS
9.18232e-23	-0.269649	0.296	0.416	2.59217e-18	coelEpi	IRF2BP2
9.70722e-23	-0.171304	0.074	0.184	2.74035e-18	coelEpi	ANTXR2
1.08102e-22	-0.165468	0.031	0.112	3.05172e-18	coelEpi	SLC4A3
1.08349e-22	-0.250275	0.896	0.912	3.0587e-18	coelEpi	NDUFS5
1.13464e-22	-0.252417	0.17	0.269	3.20308e-18	coelEpi	LRRFIP2
1.16482e-22	0.156909	0.277	0.105	3.28829e-18	coelEpi	CCBE1
1.22788e-22	-0.315116	0.212	0.317	3.46631e-18	coelEpi	TSPYL2
1.24192e-22	-0.309862	0.236	0.352	3.50593e-18	coelEpi	XIST
1.28223e-22	-0.248868	0.576	0.674	3.61974e-18	coelEpi	GRINA
1.32592e-22	0.20277	0.548	0.388	3.74309e-18	coelEpi	YIF1A
1.37533e-22	0.204589	0.412	0.256	3.88256e-18	coelEpi	CAPN2
1.5528e-22	0.214917	0.229	0.109	4.38356e-18	coelEpi	CSRP2
1.60674e-22	-0.173645	0.015	0.089	4.53584e-18	coelEpi	CXCR4
1.94703e-22	0.18256	0.974	0.938	5.49645e-18	coelEpi	RPL26
1.99908e-22	-0.29062	0.332	0.442	5.64342e-18	coelEpi	SMARCA1
2.19654e-22	0.119373	0.12	0.037	6.20083e-18	coelEpi	LOXL2
2.62575e-22	-0.294937	0.176	0.278	7.41249e-18	coelEpi	NUDT4
2.68557e-22	-0.175573	0.061	0.153	7.58136e-18	coelEpi	OTUD3
2.70126e-22	-0.214983	0.147	0.264	7.62566e-18	coelEpi	ZNF160
3.43733e-22	-0.175371	0.083	0.188	9.70359e-18	coelEpi	SIPA1L1
3.44366e-22	0.189017	0.409	0.241	9.72144e-18	coelEpi	SORBS3
3.73582e-22	-0.13503	0.026	0.106	1.05462e-17	coelEpi	CHRM3
4.04055e-22	-0.201535	0.056	0.139	1.14065e-17	coelEpi	NRXN3
4.26056e-22	0.169275	0.298	0.152	1.20276e-17	coelEpi	SLC10A3
4.59346e-22	-0.185253	0.083	0.185	1.29673e-17	coelEpi	WASF3
4.68504e-22	-0.155449	0.041	0.124	1.32259e-17	coelEpi	ZNF66
5.11679e-22	-0.237212	0.319	0.439	1.44447e-17	coelEpi	SPAG16
5.44794e-22	-0.148052	0.043	0.129	1.53795e-17	coelEpi	WIPI1
5.45866e-22	0.0885401	0.085	0.018	1.54098e-17	coelEpi	RHBDF1
5.52596e-22	-0.2537	0.381	0.499	1.55998e-17	coelEpi	SMARCA5
5.84558e-22	0.135036	0.151	0.054	1.65021e-17	coelEpi	CNIH3
5.93956e-22	0.098782	0.085	0.019	1.67674e-17	coelEpi	NDST3
5.96423e-22	0.149595	0.173	0.07	1.6837e-17	coelEpi	MEIS3
6.01208e-22	-0.232551	0.178	0.29	1.69721e-17	coelEpi	NFE2L1
6.14462e-22	0.175537	0.922	0.868	1.73463e-17	coelEpi	SNRPD2
6.18829e-22	-0.204126	0.069	0.177	1.74696e-17	coelEpi	GABRG1
6.32426e-22	-0.275711	0.548	0.625	1.78534e-17	coelEpi	TPM3
6.75231e-22	-0.21756	0.173	0.289	1.90618e-17	coelEpi	FAM13A
6.80848e-22	-0.216487	0.112	0.204	1.92203e-17	coelEpi	PPP1R13B
6.98403e-22	0.1807	0.431	0.247	1.97159e-17	coelEpi	FBXO17
7.24677e-22	0.191214	0.78	0.646	2.04576e-17	coelEpi	DDAH2
7.25616e-22	0.188785	0.851	0.76	2.04841e-17	coelEpi	EIF3H
7.27727e-22	0.10372	0.107	0.028	2.05437e-17	coelEpi	KCNA4
7.45515e-22	-0.210488	0.19	0.301	2.10459e-17	coelEpi	SDHAF3
8.77765e-22	0.127223	0.134	0.043	2.47793e-17	coelEpi	CDH18
9.08383e-22	-0.199772	0.058	0.146	2.56437e-17	coelEpi	CYP27A1
9.56903e-22	-0.146453	0.039	0.122	2.70134e-17	coelEpi	RND2
9.6865e-22	-0.168971	0.068	0.163	2.7345e-17	coelEpi	MEX3C
9.88876e-22	-0.170133	0.071	0.179	2.7916e-17	coelEpi	SLC12A2
9.90447e-22	0.215569	0.579	0.408	2.79603e-17	coelEpi	PTN
9.91772e-22	0.125043	0.12	0.033	2.79977e-17	coelEpi	CTSK
1.00552e-21	0.411458	0.888	0.826	2.83857e-17	coelEpi	JUN
1.04544e-21	-0.281757	0.66	0.723	2.95129e-17	coelEpi	DYNLT1
1.04781e-21	0.145385	0.966	0.944	2.95798e-17	coelEpi	SUMO2
1.06058e-21	-0.255188	0.688	0.767	2.994e-17	coelEpi	SRRM2
1.15112e-21	-0.216259	0.101	0.196	3.24962e-17	coelEpi	TMEM59L
1.17536e-21	0.162557	0.126	0.053	3.31804e-17	coelEpi	ARX
1.20591e-21	-0.210662	0.154	0.271	3.4043e-17	coelEpi	SIMC1
1.26966e-21	0.348635	0.546	0.403	3.58425e-17	coelEpi	SFRP1
1.33367e-21	-0.237293	0.265	0.38	3.76496e-17	coelEpi	AP2A1
1.34308e-21	0.190798	0.469	0.3	3.79151e-17	coelEpi	LETMD1
1.42657e-21	0.194227	0.26	0.135	4.0272e-17	coelEpi	LMNB1
1.49835e-21	-0.181035	0.041	0.123	4.22984e-17	coelEpi	STC1
1.54202e-21	-0.235016	0.166	0.28	4.35312e-17	coelEpi	FADS2
1.59159e-21	-0.159313	0.054	0.157	4.49307e-17	coelEpi	PLEKHA2
1.67744e-21	-0.179083	0.101	0.206	4.7354e-17	coelEpi	RCC2
1.77106e-21	-0.209829	0.153	0.266	4.99971e-17	coelEpi	TRIM8
1.77824e-21	-0.203379	0.116	0.212	5.01996e-17	coelEpi	FBXL20
1.78527e-21	-0.25993	0.411	0.516	5.03983e-17	coelEpi	PRRC2B
1.79432e-21	0.131607	0.14	0.053	5.06538e-17	coelEpi	NDNF
1.86655e-21	-0.114917	0.016	0.086	5.26926e-17	coelEpi	RNF208
1.87892e-21	0.139372	0.987	0.974	5.3042e-17	coelEpi	RPS16
1.90951e-21	0.152394	0.15	0.05	5.39056e-17	coelEpi	MBP
1.97939e-21	0.111138	0.133	0.036	5.58781e-17	coelEpi	GPR146
2.02393e-21	-0.207242	0.163	0.28	5.71356e-17	coelEpi	IREB2
2.25229e-21	-0.173686	0.038	0.12	6.35823e-17	coelEpi	FBXL19
2.30666e-21	-0.452848	0.389	0.491	6.51171e-17	coelEpi	BTG2
2.33097e-21	-0.283838	0.432	0.521	6.58032e-17	coelEpi	MRPL16
2.34606e-21	-0.164664	0.073	0.168	6.62292e-17	coelEpi	MB21D2
2.44058e-21	-0.116856	0.016	0.087	6.88975e-17	coelEpi	NLK
2.64907e-21	0.105587	0.097	0.021	7.47832e-17	coelEpi	ITIH5
2.65678e-21	-0.150114	0.058	0.154	7.5001e-17	coelEpi	ALDH5A1
3.19116e-21	0.219091	0.503	0.353	9.00864e-17	coelEpi	UBE2E2
3.50318e-21	-0.239566	0.568	0.648	9.88949e-17	coelEpi	TBCB
3.94611e-21	-0.220573	0.11	0.202	1.11399e-16	coelEpi	RIC3
3.97939e-21	-0.243909	0.105	0.203	1.12338e-16	coelEpi	HMGN5
4.19236e-21	-0.157544	0.064	0.154	1.1835e-16	coelEpi	DHX32
4.19923e-21	-0.180855	0.091	0.195	1.18544e-16	coelEpi	PCNX1
4.36844e-21	-0.255752	0.384	0.496	1.23321e-16	coelEpi	GOLGB1
4.47758e-21	-0.201415	0.181	0.295	1.26402e-16	coelEpi	CMC2
4.48922e-21	0.185595	0.885	0.822	1.26731e-16	coelEpi	RPL36AL
4.50339e-21	-0.253081	0.353	0.46	1.27131e-16	coelEpi	DHX30
4.50724e-21	0.112448	0.106	0.029	1.2724e-16	coelEpi	SDR42E1
4.54059e-21	-0.295686	0.221	0.323	1.28181e-16	coelEpi	COL4A1
4.64514e-21	-0.190785	0.113	0.221	1.31132e-16	coelEpi	FBXO34
4.7727e-21	-0.180844	0.106	0.221	1.34733e-16	coelEpi	LIMA1
4.92203e-21	0.152783	0.23	0.105	1.38949e-16	coelEpi	EPS8L2
5.00285e-21	-0.262891	0.505	0.598	1.4123e-16	coelEpi	TOP1
5.04424e-21	0.204347	0.792	0.698	1.42399e-16	coelEpi	POLR2L
5.13277e-21	0.123463	0.116	0.035	1.44898e-16	coelEpi	CNTNAP3B
5.18108e-21	-0.228684	0.255	0.362	1.46262e-16	coelEpi	ACTR1A
5.98344e-21	-0.204849	0.115	0.217	1.68913e-16	coelEpi	SLK
6.07028e-21	0.135542	0.147	0.056	1.71364e-16	coelEpi	AC002454.1
6.09799e-21	-0.207874	0.036	0.109	1.72146e-16	coelEpi	ERBB3
6.11144e-21	-0.24917	0.198	0.306	1.72526e-16	coelEpi	SLC25A37
6.65517e-21	-0.210296	0.16	0.283	1.87875e-16	coelEpi	SREBF2
7.57784e-21	-0.249456	0.264	0.373	2.13922e-16	coelEpi	RBM6
8.48915e-21	0.285101	0.345	0.22	2.39649e-16	coelEpi	TMEM176B
8.60696e-21	-0.174022	0.088	0.193	2.42974e-16	coelEpi	TRUB1
8.80167e-21	-0.14201	0.049	0.14	2.48471e-16	coelEpi	C9orf116
8.81408e-21	-0.277453	0.272	0.391	2.48822e-16	coelEpi	PEG10
9.01353e-21	-0.235472	0.187	0.292	2.54452e-16	coelEpi	ZNF493
9.14455e-21	-0.220518	0.121	0.233	2.58151e-16	coelEpi	MEF2C
9.59806e-21	-0.188137	0.098	0.203	2.70953e-16	coelEpi	CD22
9.86904e-21	0.214514	0.411	0.252	2.78603e-16	coelEpi	DAPK1
9.98395e-21	-0.158267	0.033	0.109	2.81847e-16	coelEpi	KLHL15
1.05016e-20	-0.208574	0.144	0.253	2.9646e-16	coelEpi	KIAA1109
1.11934e-20	-0.381236	0.572	0.669	3.1599e-16	coelEpi	JUNB
1.13613e-20	-0.234015	0.198	0.307	3.20731e-16	coelEpi	WNK1
1.16548e-20	-0.24781	0.276	0.38	3.29016e-16	coelEpi	DUSP23
1.18635e-20	-0.18522	0.061	0.146	3.34906e-16	coelEpi	ELP1
1.27359e-20	0.170159	0.891	0.797	3.59535e-16	coelEpi	KRT8
1.29589e-20	0.149131	0.159	0.06	3.65829e-16	coelEpi	RHPN2
1.33845e-20	-0.235011	0.167	0.266	3.77845e-16	coelEpi	ZMYND8
1.39094e-20	-0.22959	0.045	0.114	3.92662e-16	coelEpi	TTYH1
1.3969e-20	-0.204443	0.118	0.222	3.94344e-16	coelEpi	MPRIP
1.43047e-20	-0.163557	0.04	0.126	4.03822e-16	coelEpi	ACSS1
1.44793e-20	0.195994	0.417	0.273	4.08751e-16	coelEpi	YIPF2
1.46356e-20	-0.232938	0.247	0.367	4.13164e-16	coelEpi	ARMT1
1.62675e-20	-0.301434	0.99	0.992	4.5923e-16	coelEpi	MT-ND4L
1.71304e-20	0.18603	0.495	0.34	4.83592e-16	coelEpi	EI24
1.77707e-20	-0.205027	0.091	0.176	5.01667e-16	coelEpi	ABCA1
1.86996e-20	-0.146511	0.034	0.112	5.27888e-16	coelEpi	SYT11
1.92569e-20	0.212383	0.459	0.315	5.43622e-16	coelEpi	ARL5A
1.96434e-20	-0.25221	0.135	0.249	5.54534e-16	coelEpi	RELN
2.19103e-20	-0.14972	0.046	0.134	6.18527e-16	coelEpi	FAM229A
2.21003e-20	0.115973	0.144	0.043	6.23891e-16	coelEpi	LOXL1
2.24785e-20	-0.155756	0.049	0.136	6.34567e-16	coelEpi	BRWD3
2.27084e-20	-0.214247	0.191	0.302	6.41059e-16	coelEpi	MOV10
2.31217e-20	-0.121118	0.015	0.084	6.52725e-16	coelEpi	PDE8A
2.37228e-20	-0.148039	0.026	0.101	6.69696e-16	coelEpi	KCNMA1
2.52312e-20	-0.157271	0.055	0.143	7.12277e-16	coelEpi	CCDC74A
2.66886e-20	-0.293683	0.322	0.424	7.53421e-16	coelEpi	RHOC
2.75153e-20	-0.207267	0.126	0.224	7.76758e-16	coelEpi	ZNRF3
3.00643e-20	0.158186	0.277	0.139	8.48715e-16	coelEpi	UXS1
3.17211e-20	-0.218186	0.302	0.415	8.95485e-16	coelEpi	YIF1B
3.24423e-20	-0.153196	0.053	0.152	9.15848e-16	coelEpi	ZNF708
3.33192e-20	-0.210032	0.058	0.139	9.40601e-16	coelEpi	2021-03-03
3.33816e-20	-0.233756	0.32	0.441	9.42363e-16	coelEpi	HERC2
3.4459e-20	-0.196442	0.151	0.254	9.72778e-16	coelEpi	ST6GALNAC4
3.7426e-20	0.121227	0.118	0.039	1.05654e-15	coelEpi	UNC5B-AS1
3.91676e-20	-0.137434	0.036	0.115	1.1057e-15	coelEpi	LRP3
4.22076e-20	-0.232133	0.194	0.299	1.19152e-15	coelEpi	MLLT11
4.25897e-20	-0.210676	0.209	0.318	1.20231e-15	coelEpi	CASP6
4.54773e-20	-0.109557	0.018	0.088	1.28383e-15	coelEpi	TAGLN3
4.81731e-20	-0.243846	0.361	0.469	1.35993e-15	coelEpi	ADD1
4.84954e-20	-0.242977	0.494	0.595	1.36903e-15	coelEpi	AKR1B1
5.08026e-20	-0.266417	0.168	0.256	1.43416e-15	coelEpi	FAM98A
5.09491e-20	-0.197583	0.178	0.284	1.43829e-15	coelEpi	ANKRD54
5.1442e-20	-0.147204	0.047	0.126	1.45221e-15	coelEpi	DUSP16
5.36857e-20	-0.233792	0.653	0.728	1.51555e-15	coelEpi	ARL6IP4
5.65905e-20	-0.148109	0.043	0.125	1.59755e-15	coelEpi	GUCY1A1
5.66884e-20	0.169483	0.279	0.14	1.60031e-15	coelEpi	MCC
5.93301e-20	0.262795	0.257	0.151	1.67489e-15	coelEpi	PARM1
5.97361e-20	0.279259	0.288	0.18	1.68635e-15	coelEpi	TMEM176A
6.61703e-20	-0.174532	0.089	0.193	1.86799e-15	coelEpi	VPS13C
6.82395e-20	-0.18096	0.126	0.227	1.9264e-15	coelEpi	GMCL1
6.89533e-20	-0.199664	0.131	0.227	1.94655e-15	coelEpi	MLXIP
7.05766e-20	0.165371	0.34	0.19	1.99238e-15	coelEpi	RDH14
7.21238e-20	-0.198533	0.044	0.132	2.03606e-15	coelEpi	SGK1
7.24355e-20	0.0955552	0.085	0.02	2.04485e-15	coelEpi	ODAM
7.40338e-20	-0.178691	0.11	0.217	2.08997e-15	coelEpi	FAM234A
8.47268e-20	0.200795	0.629	0.483	2.39184e-15	coelEpi	NFIB
8.69688e-20	-0.271295	0.355	0.456	2.45513e-15	coelEpi	CHPF
8.81788e-20	0.22787	0.577	0.441	2.48929e-15	coelEpi	C5orf15
9.00511e-20	-0.129481	0.032	0.105	2.54214e-15	coelEpi	SPATA13
9.14884e-20	-0.192369	0.116	0.217	2.58272e-15	coelEpi	TULP4
9.30199e-20	-0.168845	0.099	0.196	2.62595e-15	coelEpi	HK1
9.7379e-20	0.172944	0.849	0.766	2.74901e-15	coelEpi	ARF1
1.007e-19	-0.213849	0.129	0.222	2.84276e-15	coelEpi	FYN
1.03593e-19	0.103661	0.104	0.027	2.92444e-15	coelEpi	PXDC1
1.06311e-19	-0.360566	0.492	0.556	3.00116e-15	coelEpi	TMEM123
1.10257e-19	-0.232069	0.342	0.452	3.11255e-15	coelEpi	PUM1
1.1847e-19	-0.182562	0.031	0.099	3.3444e-15	coelEpi	RRAD
1.28218e-19	0.253776	0.177	0.101	3.6196e-15	coelEpi	STK31
1.28887e-19	-0.170287	0.033	0.106	3.63849e-15	coelEpi	PLXNC1
1.33051e-19	-0.208558	0.208	0.334	3.75604e-15	coelEpi	MAF
1.36979e-19	-0.166047	0.06	0.153	3.86693e-15	coelEpi	ADRA2A
1.37442e-19	0.157485	0.225	0.102	3.87999e-15	coelEpi	INF2
1.38093e-19	-0.195623	0.17	0.284	3.89837e-15	coelEpi	UBR4
1.43549e-19	-0.194252	0.151	0.268	4.05239e-15	coelEpi	ANKRD50
1.53846e-19	0.156077	0.956	0.926	4.34308e-15	coelEpi	EEF1D
1.58313e-19	0.195018	0.618	0.478	4.46918e-15	coelEpi	MMADHC
1.5935e-19	0.126551	0.137	0.052	4.49846e-15	coelEpi	SLC22A18
1.64394e-19	0.194012	0.699	0.593	4.64085e-15	coelEpi	P4HB
1.71846e-19	-0.23386	0.354	0.467	4.85121e-15	coelEpi	ZKSCAN1
1.7368e-19	-0.283583	0.59	0.665	4.903e-15	coelEpi	TUBB4B
1.77665e-19	-0.215266	0.256	0.362	5.01547e-15	coelEpi	MOB1A
1.89483e-19	-0.226701	0.209	0.313	5.34909e-15	coelEpi	TMOD3
1.95632e-19	-0.175425	0.124	0.227	5.5227e-15	coelEpi	HERC4
2.03778e-19	0.162166	0.218	0.101	5.75265e-15	coelEpi	FXYD5
2.04287e-19	-0.216422	0.226	0.332	5.76702e-15	coelEpi	MTHFS
2.05768e-19	-0.149647	0.053	0.136	5.80883e-15	coelEpi	KMT2D
2.24229e-19	0.131033	0.172	0.072	6.32998e-15	coelEpi	ABTB1
2.30617e-19	-0.22916	0.375	0.472	6.51032e-15	coelEpi	RPL26L1
2.30829e-19	-0.143393	0.035	0.108	6.51631e-15	coelEpi	STK11IP
2.32263e-19	0.188732	0.539	0.385	6.55678e-15	coelEpi	ARL6IP5
2.496e-19	0.136945	0.151	0.063	7.04622e-15	coelEpi	PRCD
2.51572e-19	-0.19066	0.321	0.456	7.10189e-15	coelEpi	MBNL3
2.55035e-19	-0.169698	0.092	0.195	7.19965e-15	coelEpi	TMEM65
2.73996e-19	-0.19928	0.202	0.311	7.7349e-15	coelEpi	HEBP2
2.78208e-19	-0.15691	0.079	0.174	7.8538e-15	coelEpi	SSTR3
3.06809e-19	0.176165	0.272	0.127	8.66122e-15	coelEpi	PLLP
3.1104e-19	-0.204872	0.11	0.196	8.78065e-15	coelEpi	NBPF26
3.16418e-19	-0.217185	0.269	0.375	8.93248e-15	coelEpi	DLGAP4
3.25253e-19	-0.203401	0.067	0.145	9.1819e-15	coelEpi	PRPS2
3.5476e-19	0.22384	0.319	0.208	1.00149e-14	coelEpi	C1orf198
3.63001e-19	-0.203629	0.057	0.141	1.02475e-14	coelEpi	RASGEF1B
3.7196e-19	0.184377	0.643	0.512	1.05004e-14	coelEpi	RHEB
3.77962e-19	0.168955	0.333	0.192	1.06699e-14	coelEpi	RNASET2
3.88055e-19	-0.163525	0.074	0.163	1.09548e-14	coelEpi	STK38L
4.42616e-19	-0.183054	0.034	0.11	1.2495e-14	coelEpi	SMOC1
4.49986e-19	0.19206	0.34	0.195	1.27031e-14	coelEpi	CXADR
4.57237e-19	-0.286321	0.833	0.865	1.29078e-14	coelEpi	BTG1
4.65797e-19	0.102835	0.127	0.03	1.31494e-14	coelEpi	TSPAN2
5.3647e-19	-0.176875	0.048	0.124	1.51446e-14	coelEpi	AKR1C2
5.54352e-19	0.226101	0.567	0.442	1.56494e-14	coelEpi	CKAP4
5.84126e-19	-0.215573	0.115	0.201	1.64899e-14	coelEpi	ITGAV
5.99016e-19	-0.121368	0.031	0.106	1.69102e-14	coelEpi	GAB2
6.43909e-19	-0.260919	0.328	0.425	1.81775e-14	coelEpi	PDXK
6.44916e-19	-0.22117	0.251	0.356	1.8206e-14	coelEpi	DCTN1
6.68416e-19	0.202826	0.505	0.353	1.88694e-14	coelEpi	ZNF503
6.75117e-19	-0.160046	0.096	0.19	1.90585e-14	coelEpi	ALKBH5
7.31843e-19	0.135788	0.17	0.07	2.06599e-14	coelEpi	AFAP1
7.60605e-19	-0.178517	0.108	0.202	2.14719e-14	coelEpi	YEATS2
7.64389e-19	-0.160028	0.077	0.174	2.15787e-14	coelEpi	UPF1
8.48408e-19	0.1258	0.125	0.039	2.39506e-14	coelEpi	NPR1
8.66306e-19	-0.236829	0.707	0.755	2.44558e-14	coelEpi	ROMO1
8.77548e-19	0.298867	0.485	0.344	2.47732e-14	coelEpi	KLF6
9.8113e-19	0.169097	0.484	0.297	2.76973e-14	coelEpi	PDLIM4
9.817e-19	0.131715	0.16	0.062	2.77134e-14	coelEpi	EDIL3
1.00809e-18	-0.233135	0.436	0.531	2.84583e-14	coelEpi	PGD
1.03817e-18	-0.222058	0.148	0.245	2.93075e-14	coelEpi	LSAMP
1.05901e-18	-0.140149	0.032	0.1	2.9896e-14	coelEpi	PLEKHB1
1.15011e-18	-0.230055	0.734	0.795	3.24676e-14	coelEpi	NDUFB11
1.32006e-18	-0.289582	0.416	0.514	3.72654e-14	coelEpi	HLA-C
1.34318e-18	0.0968611	0.127	0.042	3.7918e-14	coelEpi	PYGL
1.37617e-18	-0.16652	0.098	0.189	3.88492e-14	coelEpi	PGP
1.3852e-18	-0.253879	0.273	0.386	3.91042e-14	coelEpi	IDI1
1.42258e-18	-0.139452	0.032	0.105	4.01594e-14	coelEpi	SPHKAP
1.50541e-18	-0.187058	0.091	0.183	4.24977e-14	coelEpi	IRS1
1.50705e-18	-0.248886	0.177	0.254	4.25439e-14	coelEpi	NUDT11
1.54285e-18	0.127836	0.214	0.088	4.35546e-14	coelEpi	RHOD
1.60118e-18	-0.225248	0.248	0.35	4.52012e-14	coelEpi	SMC5
1.72434e-18	0.171744	0.091	0.029	4.8678e-14	coelEpi	ITLN1
1.75497e-18	-0.118997	0.038	0.111	4.95427e-14	coelEpi	PVT1
1.77311e-18	-0.259228	0.35	0.447	5.00548e-14	coelEpi	FGFR1
1.78419e-18	-0.148455	0.054	0.134	5.03678e-14	coelEpi	OCRL
1.91132e-18	-0.403795	0.101	0.156	5.39566e-14	coelEpi	PAX8
1.94038e-18	-0.174229	0.036	0.105	5.4777e-14	coelEpi	CLSTN2
1.98321e-18	-0.169675	0.068	0.139	5.59861e-14	coelEpi	ARL4C
2.01216e-18	-0.197658	0.158	0.262	5.68033e-14	coelEpi	BMPR2
2.15939e-18	-0.221694	0.25	0.351	6.09596e-14	coelEpi	RPRD1A
2.3623e-18	-0.195144	0.07	0.142	6.66877e-14	coelEpi	KANK1
2.38285e-18	-0.20437	0.079	0.163	6.72678e-14	coelEpi	PTCH2
2.41961e-18	-0.242095	0.559	0.632	6.83055e-14	coelEpi	PDCD5
2.48563e-18	0.196801	0.172	0.084	7.01692e-14	coelEpi	LAMA4
2.50433e-18	0.147402	0.216	0.101	7.06973e-14	coelEpi	CDCA4
2.653e-18	-0.228699	0.611	0.672	7.48941e-14	coelEpi	SRI
2.9229e-18	-0.188785	0.125	0.22	8.25135e-14	coelEpi	CITED4
3.03558e-18	0.193863	0.489	0.331	8.56943e-14	coelEpi	BASP1
3.05653e-18	-0.118258	0.03	0.11	8.62859e-14	coelEpi	PDP1
3.10166e-18	-0.132183	0.038	0.109	8.756e-14	coelEpi	VASH1
3.32894e-18	-0.233856	0.337	0.437	9.39759e-14	coelEpi	CAND1
3.4869e-18	-0.146308	0.055	0.142	9.84352e-14	coelEpi	SCRIB
3.48768e-18	0.105904	0.086	0.025	9.84572e-14	coelEpi	IL17RE
3.52234e-18	-0.216725	0.18	0.294	9.94355e-14	coelEpi	PPM1K
3.64231e-18	-0.214153	0.965	0.971	1.02822e-13	coelEpi	PPIA
3.72126e-18	-0.14636	0.05	0.122	1.05051e-13	coelEpi	MMD
3.80408e-18	-0.148163	0.069	0.154	1.07389e-13	coelEpi	KIAA0895L
4.12395e-18	-0.212124	0.199	0.292	1.16419e-13	coelEpi	CASC4
4.31242e-18	0.152473	0.927	0.896	1.21739e-13	coelEpi	RPL23
4.3301e-18	-0.18594	0.164	0.27	1.22239e-13	coelEpi	REV1
4.42749e-18	-0.164913	0.055	0.124	1.24988e-13	coelEpi	OAF
4.46878e-18	0.183168	0.633	0.501	1.26154e-13	coelEpi	RTN3
4.63774e-18	-0.177556	0.166	0.274	1.30923e-13	coelEpi	PPME1
4.66552e-18	-0.203863	0.295	0.401	1.31708e-13	coelEpi	PDCD6IP
4.74532e-18	-0.152516	0.061	0.153	1.3396e-13	coelEpi	ZIM2
4.90622e-18	-0.154979	0.072	0.159	1.38503e-13	coelEpi	ROBO2
5.54617e-18	-0.165712	0.094	0.199	1.56568e-13	coelEpi	JARID2
5.64727e-18	0.160784	0.158	0.074	1.59423e-13	coelEpi	MAP3K8
5.65367e-18	-0.240748	0.622	0.682	1.59603e-13	coelEpi	AP2S1
5.71201e-18	-0.185317	0.102	0.191	1.6125e-13	coelEpi	BTBD3
6.09896e-18	0.212055	0.346	0.21	1.72174e-13	coelEpi	CDON
6.28432e-18	-0.180238	0.176	0.276	1.77406e-13	coelEpi	DRAM2
6.68053e-18	0.12597	0.172	0.069	1.88591e-13	coelEpi	PHLDA3
6.99211e-18	-0.175609	0.159	0.26	1.97387e-13	coelEpi	SIKE1
7.34407e-18	-0.12267	0.036	0.114	2.07323e-13	coelEpi	DEPDC5
7.39094e-18	-0.222674	0.399	0.508	2.08646e-13	coelEpi	SCAF11
7.46422e-18	-0.11244	0.026	0.087	2.10715e-13	coelEpi	FNDC10
7.78172e-18	-0.160745	0.091	0.184	2.19678e-13	coelEpi	TOM1L2
7.81924e-18	-0.133566	0.055	0.134	2.20737e-13	coelEpi	ANGEL1
8.06505e-18	0.187796	0.512	0.377	2.27676e-13	coelEpi	CRTAP
8.20403e-18	-0.50449	0.809	0.817	2.316e-13	coelEpi	CST3
8.35864e-18	-0.216522	0.262	0.369	2.35964e-13	coelEpi	OPTN
8.76227e-18	-0.140542	0.045	0.122	2.47359e-13	coelEpi	SRGAP1
9.50558e-18	-0.312236	0.731	0.776	2.68343e-13	coelEpi	WSB1
9.66815e-18	-0.235013	0.568	0.637	2.72932e-13	coelEpi	TMEM14B
9.66967e-18	0.196256	0.828	0.733	2.72975e-13	coelEpi	SEPT7
1.12406e-17	-0.218016	0.736	0.789	3.17321e-13	coelEpi	HIGD2A
1.1307e-17	-0.223812	0.587	0.657	3.19196e-13	coelEpi	STMP1
1.24458e-17	-0.232384	0.183	0.292	3.51346e-13	coelEpi	CYP51A1
1.25479e-17	0.211427	0.354	0.234	3.54227e-13	coelEpi	PCDH9
1.2811e-17	-0.238869	0.535	0.611	3.61655e-13	coelEpi	PTTG1IP
1.38147e-17	-0.221372	0.299	0.386	3.89989e-13	coelEpi	TOMM34
1.39231e-17	-0.204051	0.22	0.325	3.93048e-13	coelEpi	POLR2A
1.42088e-17	-0.152843	0.074	0.153	4.01113e-13	coelEpi	HTT
1.43147e-17	-0.125942	0.043	0.115	4.04104e-13	coelEpi	ZHX2
1.47362e-17	0.21418	0.379	0.255	4.16002e-13	coelEpi	LGALS8
1.49716e-17	0.128464	0.182	0.067	4.22647e-13	coelEpi	LDB2
1.51055e-17	-0.13923	0.05	0.121	4.26429e-13	coelEpi	SORT1
1.62773e-17	-0.221921	0.557	0.632	4.59509e-13	coelEpi	ATP6V1F
1.67062e-17	0.0773587	0.096	0.02	4.71616e-13	coelEpi	SCUBE3
1.69424e-17	-0.155751	0.101	0.2	4.78283e-13	coelEpi	ARHGEF9
1.70344e-17	-0.263299	0.206	0.327	4.80881e-13	coelEpi	DIRAS3
1.7596e-17	0.140501	0.206	0.091	4.96735e-13	coelEpi	HAND2
1.79911e-17	0.108958	0.152	0.058	5.07889e-13	coelEpi	MPP3
1.83826e-17	-0.226961	0.265	0.365	5.18941e-13	coelEpi	KLHL24
1.87228e-17	-0.233691	0.675	0.737	5.28545e-13	coelEpi	HNRNPU
1.87754e-17	-0.185978	0.222	0.317	5.3003e-13	coelEpi	TOMM40
1.9332e-17	0.181123	0.798	0.719	5.45742e-13	coelEpi	PLD3
1.98872e-17	-0.197647	0.142	0.228	5.61416e-13	coelEpi	ME1
2.06157e-17	0.0706808	0.081	0.017	5.8198e-13	coelEpi	STAMBPL1
2.1113e-17	-0.260463	0.094	0.176	5.96021e-13	coelEpi	AQP3
2.12635e-17	-0.232205	0.851	0.881	6.0027e-13	coelEpi	ATP6V1G1
2.12878e-17	-0.207023	0.152	0.242	6.00954e-13	coelEpi	CD55
2.13576e-17	-0.176685	0.151	0.254	6.02926e-13	coelEpi	CIC
2.13688e-17	0.176623	0.472	0.322	6.0324e-13	coelEpi	NLRP1
2.16188e-17	-0.207226	0.279	0.381	6.10298e-13	coelEpi	MAP3K13
2.17027e-17	-0.403931	0.108	0.18	6.12668e-13	coelEpi	APOC1
2.28123e-17	0.157079	0.183	0.083	6.43992e-13	coelEpi	SLITRK4
2.35453e-17	-0.183224	0.178	0.271	6.64685e-13	coelEpi	RNF8
2.36707e-17	-0.163462	0.126	0.221	6.68223e-13	coelEpi	RB1
2.378e-17	-0.187582	0.105	0.194	6.71309e-13	coelEpi	PTPRD
2.38783e-17	0.188912	0.452	0.312	6.74083e-13	coelEpi	FAM177A1
2.40736e-17	-0.151861	0.091	0.175	6.79598e-13	coelEpi	RYBP
2.44657e-17	0.176899	0.536	0.39	6.90668e-13	coelEpi	GSTM2
2.47715e-17	0.21885	0.163	0.08	6.99298e-13	coelEpi	HIST1H2BC
2.59299e-17	0.209799	0.357	0.235	7.32002e-13	coelEpi	DSG2
2.66433e-17	0.16615	0.381	0.236	7.52142e-13	coelEpi	SERTAD3
2.77865e-17	-0.190912	0.186	0.288	7.84414e-13	coelEpi	CRMP1
2.97298e-17	0.161698	0.781	0.672	8.39273e-13	coelEpi	FKBP1A
3.0176e-17	-0.231337	0.678	0.729	8.51868e-13	coelEpi	RBM8A
3.15251e-17	-0.206159	0.238	0.344	8.89954e-13	coelEpi	CFLAR
3.22298e-17	-0.246475	0.579	0.642	9.09846e-13	coelEpi	SNRPN
3.22688e-17	0.133227	0.181	0.08	9.10949e-13	coelEpi	GXYLT2
3.46586e-17	-0.210786	0.306	0.407	9.78411e-13	coelEpi	SRPK2
3.49197e-17	-0.210632	0.433	0.525	9.85782e-13	coelEpi	AAMP
3.56321e-17	-0.119571	0.043	0.116	1.00589e-12	coelEpi	SH3BGRL2
3.70639e-17	0.13613	0.17	0.061	1.04631e-12	coelEpi	PDGFA
3.7099e-17	-0.176421	0.143	0.229	1.0473e-12	coelEpi	TUBG1
3.92333e-17	-0.357863	0.53	0.597	1.10755e-12	coelEpi	GRN
4.02334e-17	0.110036	0.104	0.037	1.13579e-12	coelEpi	CDC42EP2
4.04487e-17	-0.203083	0.212	0.311	1.14187e-12	coelEpi	AKAP13
4.19664e-17	-0.199664	0.212	0.308	1.18471e-12	coelEpi	BAZ2A
4.29302e-17	0.171548	0.501	0.346	1.21192e-12	coelEpi	WLS
4.29562e-17	-0.138895	0.053	0.13	1.21265e-12	coelEpi	GNA11
4.32695e-17	-0.168447	0.106	0.202	1.2215e-12	coelEpi	DBP
4.61532e-17	-0.1723	0.095	0.175	1.3029e-12	coelEpi	ELMSAN1
4.67769e-17	-0.163326	0.036	0.098	1.32051e-12	coelEpi	STK10
5.22148e-17	0.280794	0.469	0.321	1.47402e-12	coelEpi	CEBPD
5.46284e-17	0.103042	0.092	0.026	1.54216e-12	coelEpi	SH3GL3
5.81273e-17	-0.130738	0.042	0.109	1.64093e-12	coelEpi	CHSY1
5.94552e-17	-0.21591	0.279	0.375	1.67842e-12	coelEpi	RHBDD2
6.00786e-17	-0.201982	0.216	0.317	1.69602e-12	coelEpi	CNTLN
6.27451e-17	0.160294	0.337	0.2	1.77129e-12	coelEpi	GNG12
6.63768e-17	-0.23578	0.51	0.579	1.87382e-12	coelEpi	ISCU
6.82341e-17	-0.216806	0.163	0.264	1.92625e-12	coelEpi	HMGCR
6.95472e-17	-0.16572	0.097	0.187	1.96332e-12	coelEpi	ZNF737
7.07639e-17	-0.113642	0.038	0.107	1.99767e-12	coelEpi	ENDOG
7.0808e-17	0.129165	0.392	0.2	1.99891e-12	coelEpi	NUPR1
7.1104e-17	-0.206983	0.172	0.265	2.00727e-12	coelEpi	KIF1B
7.4437e-17	-0.104345	0.026	0.093	2.10136e-12	coelEpi	AC097534.2
7.61424e-17	-0.139656	0.064	0.154	2.1495e-12	coelEpi	KCTD2
7.67991e-17	0.122348	0.156	0.066	2.16804e-12	coelEpi	GPR143
7.75275e-17	-0.221005	0.631	0.694	2.1886e-12	coelEpi	TRAPPC1
8.01465e-17	0.12414	0.116	0.043	2.26253e-12	coelEpi	CNTN5
8.09026e-17	-0.244699	0.46	0.537	2.28388e-12	coelEpi	NKTR
8.27942e-17	-0.178523	0.151	0.257	2.33728e-12	coelEpi	KDM5C
8.38014e-17	0.169992	0.178	0.085	2.36571e-12	coelEpi	HSPA2
9.40425e-17	-0.212273	0.188	0.282	2.65482e-12	coelEpi	KLHL23
1.02157e-16	0.202438	0.525	0.389	2.88388e-12	coelEpi	YPEL3
1.03395e-16	-0.166845	0.118	0.206	2.91883e-12	coelEpi	TTYH3
1.03485e-16	0.135342	0.984	0.974	2.92139e-12	coelEpi	EIF1
1.03818e-16	-0.140664	0.057	0.135	2.93079e-12	coelEpi	TRAK1
1.05368e-16	-0.214608	0.351	0.456	2.97454e-12	coelEpi	NUMA1
1.05484e-16	-0.209003	0.205	0.3	2.9778e-12	coelEpi	MTUS1
1.0645e-16	0.13208	0.225	0.11	3.00509e-12	coelEpi	SLC35B3
1.15314e-16	-0.173221	0.108	0.191	3.25531e-12	coelEpi	ACLY
1.19524e-16	-0.229593	0.426	0.501	3.37416e-12	coelEpi	ARPP19
1.19574e-16	-0.145101	0.056	0.126	3.37556e-12	coelEpi	OCLN
1.20623e-16	0.0950241	0.095	0.017	3.40518e-12	coelEpi	HAS1
1.2242e-16	0.178543	0.542	0.385	3.45592e-12	coelEpi	ARID5B
1.28771e-16	0.181947	0.737	0.613	3.6352e-12	coelEpi	SSR3
1.29421e-16	-0.211458	0.25	0.342	3.65355e-12	coelEpi	RBM5
1.30032e-16	-0.148565	0.071	0.156	3.67081e-12	coelEpi	DIP2B
1.3376e-16	0.148944	0.877	0.819	3.77605e-12	coelEpi	EIF3M
1.35546e-16	-0.146749	0.092	0.174	3.82645e-12	coelEpi	TTLL12
1.35974e-16	-0.160784	0.093	0.185	3.83854e-12	coelEpi	PRR14L
1.36574e-16	-0.353856	0.532	0.594	3.8555e-12	coelEpi	ABRACL
1.47585e-16	-0.179148	0.142	0.231	4.16633e-12	coelEpi	SMIM14
1.5288e-16	-0.186912	0.167	0.26	4.3158e-12	coelEpi	AIF1L
1.54679e-16	0.171434	0.289	0.179	4.3666e-12	coelEpi	FAM221A
1.56676e-16	0.162181	0.288	0.174	4.42297e-12	coelEpi	MAPK3
1.58087e-16	0.131616	0.229	0.108	4.46279e-12	coelEpi	MPPED2
1.58172e-16	-0.18034	0.159	0.247	4.46521e-12	coelEpi	CDK9
1.59185e-16	-0.28659	0.272	0.389	4.4938e-12	coelEpi	HMGCS1
1.60143e-16	-0.211873	0.283	0.372	4.52084e-12	coelEpi	CWC27
1.62865e-16	-0.279435	0.994	0.995	4.59768e-12	coelEpi	MT-CO2
1.64058e-16	-0.217314	0.599	0.669	4.63136e-12	coelEpi	SNRPG
1.70326e-16	-0.175407	0.157	0.248	4.80831e-12	coelEpi	LHPP
1.86159e-16	0.17796	0.333	0.188	5.25528e-12	coelEpi	SSPN
1.90379e-16	-0.153573	0.112	0.198	5.37441e-12	coelEpi	AC006213.2
2.09445e-16	0.149235	0.311	0.178	5.91262e-12	coelEpi	SEPT11
2.09674e-16	0.114399	0.121	0.047	5.91909e-12	coelEpi	COMTD1
2.23699e-16	-0.191053	0.184	0.272	6.31502e-12	coelEpi	ATXN2L
2.24856e-16	-0.109472	0.026	0.082	6.34768e-12	coelEpi	FRRS1L
2.25035e-16	-0.178366	0.166	0.252	6.35273e-12	coelEpi	BPHL
2.53997e-16	0.189676	0.715	0.617	7.17035e-12	coelEpi	LGALS3BP
2.59927e-16	-0.155012	0.048	0.117	7.33773e-12	coelEpi	BHLHE41
2.86255e-16	-0.31662	0.99	0.989	8.08099e-12	coelEpi	MT-ND3
2.91846e-16	-0.148783	0.03	0.088	8.2388e-12	coelEpi	CTNNA2
3.12443e-16	-0.136623	0.052	0.127	8.82027e-12	coelEpi	HIPK1
3.12882e-16	-0.312357	0.393	0.471	8.83267e-12	coelEpi	CD74
3.35112e-16	0.17228	0.697	0.584	9.46022e-12	coelEpi	UFC1
3.62467e-16	-0.201576	0.209	0.302	1.02324e-11	coelEpi	SMG1
3.71651e-16	0.104578	0.132	0.048	1.04917e-11	coelEpi	PRKCG
3.99342e-16	-0.124725	0.044	0.111	1.12734e-11	coelEpi	TMEM8A
4.02238e-16	-0.300894	0.197	0.311	1.13552e-11	coelEpi	IGFBP3
4.18348e-16	-0.195932	0.263	0.353	1.181e-11	coelEpi	WAC
4.21094e-16	-0.212857	0.416	0.501	1.18875e-11	coelEpi	RNF5
4.44552e-16	-0.171289	0.118	0.205	1.25497e-11	coelEpi	ZC3H7B
4.51025e-16	0.110388	0.146	0.053	1.27324e-11	coelEpi	EDARADD
4.67507e-16	-0.185874	0.946	0.957	1.31977e-11	coelEpi	HNRNPA2B1
4.86835e-16	-0.208596	0.32	0.408	1.37433e-11	coelEpi	BAG6
4.95959e-16	-0.117422	0.035	0.103	1.40009e-11	coelEpi	RUNX1
4.96131e-16	-0.106034	0.021	0.081	1.40058e-11	coelEpi	DDIT4L
5.01003e-16	-0.262758	0.995	0.997	1.41433e-11	coelEpi	MT-CO1
5.03627e-16	-0.209203	0.303	0.396	1.42174e-11	coelEpi	POGZ
5.0715e-16	-0.136538	0.035	0.089	1.43168e-11	coelEpi	GALNT10
5.0879e-16	-0.189973	0.212	0.307	1.43631e-11	coelEpi	DNM2
5.22629e-16	-0.157325	0.035	0.097	1.47538e-11	coelEpi	ZNF280B
5.29673e-16	-0.210665	0.778	0.818	1.49527e-11	coelEpi	YWHAB
5.56061e-16	-0.206253	0.309	0.411	1.56976e-11	coelEpi	ADAR
5.57502e-16	0.102777	0.122	0.045	1.57383e-11	coelEpi	CPLX1
5.66096e-16	-0.133633	0.067	0.145	1.59809e-11	coelEpi	GNA13
5.82207e-16	-0.202773	0.374	0.46	1.64357e-11	coelEpi	THOC3
6.00272e-16	-0.178965	0.225	0.33	1.69457e-11	coelEpi	ACOT13
6.03675e-16	-0.207689	0.283	0.372	1.70417e-11	coelEpi	PAK1
6.37374e-16	-0.247453	0.292	0.372	1.79931e-11	coelEpi	SLC25A4
6.48591e-16	-0.195993	0.233	0.319	1.83097e-11	coelEpi	FAM50A
6.62947e-16	-0.157768	0.127	0.224	1.8715e-11	coelEpi	FBXO11
6.63528e-16	0.163224	0.385	0.244	1.87314e-11	coelEpi	RGS3
6.66875e-16	0.162739	0.491	0.35	1.88259e-11	coelEpi	GORASP2
6.73048e-16	0.14999	0.39	0.246	1.90001e-11	coelEpi	MED30
6.8358e-16	0.157368	0.442	0.3	1.92975e-11	coelEpi	CORO1B
6.86866e-16	-0.129717	0.039	0.105	1.93902e-11	coelEpi	PPP1R13L
6.91011e-16	-0.170599	0.147	0.244	1.95072e-11	coelEpi	PHYH
7.048e-16	-0.226888	0.168	0.244	1.98965e-11	coelEpi	SLC27A3
7.12195e-16	-0.128682	0.047	0.115	2.01053e-11	coelEpi	SP5
7.15233e-16	-0.204265	0.069	0.132	2.0191e-11	coelEpi	TMEM56
7.2948e-16	0.0923078	0.099	0.03	2.05932e-11	coelEpi	PACSIN3
7.48475e-16	-0.137191	0.042	0.109	2.11294e-11	coelEpi	ARHGEF28
7.535e-16	-0.195855	0.29	0.38	2.12713e-11	coelEpi	RNF10
7.59285e-16	-0.154931	0.109	0.198	2.14346e-11	coelEpi	KAT2A
7.61093e-16	-0.166045	0.147	0.247	2.14856e-11	coelEpi	CHD8
7.80407e-16	0.145123	0.199	0.091	2.20309e-11	coelEpi	GPR137B
8.07955e-16	0.227156	0.691	0.601	2.28086e-11	coelEpi	HSPA1B
8.08075e-16	-0.166602	0.222	0.318	2.2812e-11	coelEpi	ACAA1
8.112e-16	0.107088	0.116	0.04	2.29002e-11	coelEpi	CTTNBP2
8.23428e-16	-0.162737	0.06	0.135	2.32454e-11	coelEpi	ACSL4
8.48233e-16	-0.215168	0.395	0.476	2.39456e-11	coelEpi	SLC25A39
8.73857e-16	-0.119799	0.033	0.092	2.4669e-11	coelEpi	S1PR1
8.76282e-16	-0.121996	0.045	0.109	2.47375e-11	coelEpi	PPP1R26
8.78477e-16	-0.142944	0.066	0.14	2.47994e-11	coelEpi	PHF10
9.0183e-16	-0.249829	0.168	0.235	2.54587e-11	coelEpi	SLC1A5
9.04271e-16	-0.150273	0.122	0.228	2.55276e-11	coelEpi	MAP2
9.30842e-16	0.153056	0.316	0.186	2.62777e-11	coelEpi	FAM114A1
9.3715e-16	-0.228166	0.89	0.904	2.64557e-11	coelEpi	GNG5
9.44913e-16	-0.204564	0.923	0.939	2.66749e-11	coelEpi	SKP1
9.57782e-16	-0.185282	0.201	0.299	2.70382e-11	coelEpi	YLPM1
1.02647e-15	-0.199651	0.286	0.386	2.89774e-11	coelEpi	DDX3X
1.05005e-15	0.125445	0.188	0.09	2.9643e-11	coelEpi	SEMA4C
1.20199e-15	-0.166129	0.06	0.143	3.39322e-11	coelEpi	PPP1R1B
1.21337e-15	0.165612	0.252	0.141	3.42534e-11	coelEpi	CRIM1
1.24404e-15	-0.225091	0.276	0.366	3.51191e-11	coelEpi	IDH1
1.2533e-15	-0.21223	0.418	0.502	3.53808e-11	coelEpi	PARP1
1.27255e-15	0.0942964	0.129	0.047	3.59241e-11	coelEpi	TMTC2
1.28196e-15	-0.232869	0.824	0.858	3.61897e-11	coelEpi	FUS
1.41307e-15	0.0827795	0.108	0.034	3.98911e-11	coelEpi	GYG2
1.41408e-15	-0.743146	0.278	0.302	3.99196e-11	coelEpi	PCP4
1.42497e-15	-0.153527	0.101	0.186	4.02268e-11	coelEpi	GNAQ
1.43879e-15	-0.1582	0.066	0.14	4.0617e-11	coelEpi	ZNF385D
1.47578e-15	-0.158918	0.08	0.162	4.16612e-11	coelEpi	ARHGAP18
1.48539e-15	-0.162018	0.116	0.205	4.19325e-11	coelEpi	PDZRN3
1.50622e-15	-0.188294	0.287	0.395	4.25205e-11	coelEpi	ZMYM2
1.50789e-15	-0.144361	0.083	0.166	4.25676e-11	coelEpi	MAN2A1
1.55282e-15	0.166032	0.437	0.306	4.38361e-11	coelEpi	ALDH2
1.59041e-15	0.0969029	0.094	0.03	4.48974e-11	coelEpi	ANKRD29
1.61519e-15	-0.16305	0.044	0.104	4.55969e-11	coelEpi	DCDC2
1.70575e-15	-0.147218	0.075	0.144	4.81532e-11	coelEpi	HSD17B14
1.74028e-15	-0.191092	0.267	0.359	4.91282e-11	coelEpi	ATPAF1
1.74091e-15	-0.198049	0.214	0.304	4.91458e-11	coelEpi	RANBP2
1.77561e-15	-0.213802	0.361	0.438	5.01256e-11	coelEpi	MTPN
1.89162e-15	-0.738577	0.108	0.167	5.34004e-11	coelEpi	DLK1
1.89794e-15	-0.106863	0.037	0.107	5.35789e-11	coelEpi	AC078883.1
1.94568e-15	0.16531	0.507	0.365	5.49267e-11	coelEpi	CTSB
1.95148e-15	-0.168251	0.124	0.205	5.50903e-11	coelEpi	LCOR
1.97536e-15	-0.276855	0.065	0.113	5.57644e-11	coelEpi	PLAU
2.01685e-15	0.161601	0.389	0.249	5.69356e-11	coelEpi	TMEM132A
2.04476e-15	-0.175575	0.185	0.284	5.77236e-11	coelEpi	LSM12
2.0455e-15	-0.154113	0.112	0.196	5.77445e-11	coelEpi	KDM4B
2.04616e-15	-0.140693	0.07	0.146	5.77632e-11	coelEpi	ZFP91
2.06671e-15	-0.174965	0.12	0.203	5.83433e-11	coelEpi	MUM1L1
2.14027e-15	-0.156136	0.116	0.201	6.04198e-11	coelEpi	CSPP1
2.15497e-15	-0.125552	0.034	0.099	6.08349e-11	coelEpi	BCORL1
2.2138e-15	-0.17497	0.213	0.315	6.24957e-11	coelEpi	BORCS7
2.24945e-15	-0.214894	0.793	0.828	6.35021e-11	coelEpi	SOD1
2.35887e-15	-0.218975	0.065	0.132	6.65909e-11	coelEpi	EGR2
2.3637e-15	0.149069	0.293	0.158	6.67272e-11	coelEpi	SOSTDC1
2.36859e-15	-0.153448	0.071	0.146	6.68654e-11	coelEpi	WDFY2
2.39808e-15	0.107733	0.114	0.046	6.76977e-11	coelEpi	TRIL
2.60723e-15	-0.139577	0.061	0.14	7.3602e-11	coelEpi	B4GALT5
2.75599e-15	-0.189626	0.472	0.553	7.78016e-11	coelEpi	NDUFB3
2.89621e-15	-0.180976	0.221	0.312	8.176e-11	coelEpi	TRPT1
2.90903e-15	-0.146069	0.086	0.159	8.21219e-11	coelEpi	CASC15
2.92913e-15	0.162206	0.439	0.305	8.26892e-11	coelEpi	PDK2
3.02653e-15	-0.289608	0.062	0.126	8.5439e-11	coelEpi	NR4A2
3.05603e-15	0.153213	0.497	0.359	8.62718e-11	coelEpi	CCNB1IP1
3.26153e-15	-0.150418	0.113	0.194	9.20731e-11	coelEpi	PATZ1
3.29906e-15	-0.144417	0.086	0.161	9.31324e-11	coelEpi	NCKAP5L
3.34927e-15	-0.157912	0.103	0.185	9.455e-11	coelEpi	OXSR1
3.64455e-15	-0.215147	0.418	0.5	1.02886e-10	coelEpi	DHRS4
3.82941e-15	0.122351	0.227	0.11	1.08104e-10	coelEpi	MPP5
3.90654e-15	-0.206318	0.403	0.491	1.10282e-10	coelEpi	GDI1
4.05205e-15	-0.14108	0.063	0.131	1.14389e-10	coelEpi	PFKP
4.3708e-15	-0.143568	0.051	0.115	1.23388e-10	coelEpi	VSNL1
4.38836e-15	-0.1923	0.208	0.297	1.23883e-10	coelEpi	YAF2
4.60973e-15	-0.164533	0.149	0.242	1.30133e-10	coelEpi	MTR
4.71085e-15	0.148896	0.488	0.31	1.32987e-10	coelEpi	IGF2BP2
4.75632e-15	-0.181087	0.228	0.322	1.34271e-10	coelEpi	SETD2
4.77578e-15	-0.127882	0.057	0.134	1.3482e-10	coelEpi	NDST1
4.83513e-15	-0.137573	0.067	0.14	1.36496e-10	coelEpi	DDHD1
4.95023e-15	0.156039	0.809	0.715	1.39745e-10	coelEpi	CCT4
5.00972e-15	-0.213049	0.432	0.509	1.41424e-10	coelEpi	C19orf70
5.0755e-15	0.196452	0.976	0.98	1.43281e-10	coelEpi	RPS26
5.09011e-15	-0.168657	0.204	0.299	1.43694e-10	coelEpi	TWF1
5.13146e-15	-0.160375	0.095	0.177	1.44861e-10	coelEpi	SLC4A7
5.3243e-15	-0.12479	0.049	0.125	1.50305e-10	coelEpi	P2RX7
5.4576e-15	0.0883958	0.094	0.027	1.54068e-10	coelEpi	AFF3
5.47441e-15	-0.207998	0.158	0.234	1.54543e-10	coelEpi	CGNL1
5.96341e-15	-0.181274	0.187	0.269	1.68347e-10	coelEpi	CLCN3
6.05072e-15	-0.12457	0.051	0.123	1.70812e-10	coelEpi	PHF8
6.35118e-15	-0.185826	0.196	0.274	1.79294e-10	coelEpi	ACYP2
6.41108e-15	-0.208852	0.365	0.439	1.80985e-10	coelEpi	C5orf24
7.00517e-15	0.166184	0.851	0.797	1.97756e-10	coelEpi	HSPA5
7.13098e-15	-0.180987	0.13	0.204	2.01307e-10	coelEpi	PCCA
7.17913e-15	-0.185063	0.838	0.868	2.02667e-10	coelEpi	UQCR10
7.21391e-15	-0.110202	0.044	0.112	2.03649e-10	coelEpi	C20orf194
7.56625e-15	0.147792	0.539	0.375	2.13595e-10	coelEpi	CDH3
7.8201e-15	-0.196063	0.261	0.338	2.20761e-10	coelEpi	AKIRIN1
7.83923e-15	-0.204079	0.115	0.186	2.21301e-10	coelEpi	SSFA2
8.14605e-15	-0.158513	0.127	0.204	2.29963e-10	coelEpi	PKN1
8.17954e-15	0.159858	0.542	0.413	2.30908e-10	coelEpi	LTA4H
8.56137e-15	-0.259403	0.486	0.553	2.41688e-10	coelEpi	FDFT1
8.81858e-15	-0.173387	0.251	0.347	2.48949e-10	coelEpi	USP34
9.36278e-15	-0.160471	0.115	0.193	2.64311e-10	coelEpi	LMBR1L
9.42466e-15	0.130047	0.13	0.057	2.66058e-10	coelEpi	MXRA5
9.51485e-15	-0.145325	0.081	0.15	2.68604e-10	coelEpi	DUSP14
9.73036e-15	-0.142409	0.091	0.166	2.74688e-10	coelEpi	CCDC74B
1.00197e-14	-0.109375	0.033	0.093	2.82856e-10	coelEpi	ZNF252P-AS1
1.00336e-14	-0.225798	0.895	0.901	2.8325e-10	coelEpi	ELOB
1.00565e-14	0.105464	0.144	0.059	2.83896e-10	coelEpi	EPHA7
1.02082e-14	-0.437011	0.182	0.224	2.88177e-10	coelEpi	WFDC2
1.03049e-14	0.118917	0.197	0.09	2.90909e-10	coelEpi	CLMN
1.11476e-14	-0.260492	0.129	0.181	3.14697e-10	coelEpi	HES4
1.13835e-14	-0.110611	0.039	0.097	3.21355e-10	coelEpi	HIP1R
1.15835e-14	-0.112801	0.028	0.086	3.27001e-10	coelEpi	CCKBR
1.15845e-14	0.135612	0.941	0.91	3.27032e-10	coelEpi	COX4I1
1.16171e-14	0.138677	0.152	0.064	3.27952e-10	coelEpi	FAM171A2
1.18639e-14	0.162816	0.653	0.54	3.34917e-10	coelEpi	SEC13
1.20521e-14	-0.186191	0.205	0.288	3.40232e-10	coelEpi	MARK3
1.25653e-14	-0.14357	0.056	0.119	3.54718e-10	coelEpi	EPHA4
1.26796e-14	-0.126233	0.057	0.123	3.57944e-10	coelEpi	TMEM64
1.27782e-14	-0.174076	0.339	0.443	3.60729e-10	coelEpi	CFI
1.29449e-14	-0.0979125	0.032	0.088	3.65436e-10	coelEpi	REEP2
1.29872e-14	-0.206759	0.34	0.419	3.66628e-10	coelEpi	LAMTOR2
1.30597e-14	-0.214837	0.701	0.742	3.68675e-10	coelEpi	CDC37
1.30731e-14	-0.165989	0.167	0.259	3.69055e-10	coelEpi	CDK12
1.32624e-14	-0.162117	0.14	0.231	3.74397e-10	coelEpi	C16orf72
1.357e-14	-0.141816	0.154	0.25	3.8308e-10	coelEpi	SYNGR1
1.39229e-14	-0.123422	0.035	0.102	3.93044e-10	coelEpi	CELSR2
1.4449e-14	-0.197648	0.825	0.853	4.07897e-10	coelEpi	UBL5
1.47972e-14	-0.194793	0.348	0.442	4.17724e-10	coelEpi	CHD2
1.50676e-14	0.0889287	0.101	0.028	4.25358e-10	coelEpi	NELL1
1.51417e-14	-0.220226	0.369	0.451	4.2745e-10	coelEpi	MYH9
1.62941e-14	0.160812	0.504	0.368	4.59982e-10	coelEpi	KCNQ1OT1
1.64181e-14	-0.126854	0.081	0.155	4.63482e-10	coelEpi	NLN
1.66222e-14	-0.146052	0.103	0.19	4.69245e-10	coelEpi	SERPINB1
1.69988e-14	-0.125694	0.07	0.144	4.79877e-10	coelEpi	CAPRIN2
1.76502e-14	-0.193601	0.341	0.425	4.98265e-10	coelEpi	TPGS2
1.79292e-14	-0.197582	0.31	0.392	5.06141e-10	coelEpi	KDM5A
1.84779e-14	-0.150466	0.116	0.195	5.2163e-10	coelEpi	PCCB
1.86433e-14	-0.142155	0.096	0.167	5.26301e-10	coelEpi	CCNY
1.87514e-14	0.184272	0.092	0.027	5.29351e-10	coelEpi	PNOC
1.88167e-14	-0.2376	0.324	0.42	5.31194e-10	coelEpi	SLC40A1
2.00133e-14	-0.215501	0.99	0.991	5.64975e-10	coelEpi	GAPDH
2.04179e-14	0.152001	0.689	0.571	5.76398e-10	coelEpi	ESD
2.0635e-14	0.152909	0.502	0.367	5.82527e-10	coelEpi	SUCLG1
2.13638e-14	-0.137523	0.088	0.168	6.031e-10	coelEpi	MVP
2.13751e-14	-0.163079	0.132	0.211	6.03419e-10	coelEpi	SIN3B
2.16985e-14	-0.105964	0.055	0.13	6.12548e-10	coelEpi	WWP1
2.19177e-14	-0.112339	0.03	0.09	6.18737e-10	coelEpi	RAPGEF5
2.20263e-14	-0.110634	0.039	0.108	6.21803e-10	coelEpi	MTM1
2.23097e-14	-0.136197	0.076	0.15	6.29804e-10	coelEpi	AKAP7
2.24921e-14	-0.164324	0.19	0.281	6.34952e-10	coelEpi	POLR3GL
2.26191e-14	0.0995168	0.212	0.098	6.38539e-10	coelEpi	SUMF1
2.29481e-14	-0.205443	0.511	0.575	6.47826e-10	coelEpi	NBDY
2.39761e-14	0.153354	0.355	0.228	6.76845e-10	coelEpi	PCGF2
2.44327e-14	0.13802	0.202	0.101	6.89736e-10	coelEpi	USP25
2.44916e-14	-0.127802	0.082	0.157	6.91399e-10	coelEpi	RNF38
2.50394e-14	0.0965392	0.094	0.032	7.06863e-10	coelEpi	CDH24
2.51148e-14	-0.17932	0.238	0.32	7.0899e-10	coelEpi	ERGIC1
2.57224e-14	-0.123307	0.049	0.114	7.26143e-10	coelEpi	SLC20A1
2.60537e-14	-0.120759	0.058	0.13	7.35495e-10	coelEpi	FUT11
2.75237e-14	-0.154601	0.168	0.251	7.76994e-10	coelEpi	GLTP
2.75324e-14	-0.169701	0.138	0.21	7.77239e-10	coelEpi	CDK20
2.75749e-14	-0.191545	0.321	0.407	7.7844e-10	coelEpi	DHX9
2.76696e-14	0.0842868	0.113	0.037	7.81111e-10	coelEpi	DNM1
2.79848e-14	-0.185751	0.34	0.432	7.9001e-10	coelEpi	ABI2
2.84319e-14	-0.201272	0.243	0.325	8.02631e-10	coelEpi	PPFIBP1
2.94319e-14	0.105947	0.197	0.086	8.30862e-10	coelEpi	CALHM2
3.00297e-14	-0.0970057	0.029	0.088	8.47738e-10	coelEpi	KIAA0930
3.0956e-14	-0.142221	0.067	0.136	8.73889e-10	coelEpi	LONRF1
3.14841e-14	-0.185841	0.261	0.351	8.88796e-10	coelEpi	TP53BP1
3.26599e-14	-0.196117	0.265	0.346	9.21988e-10	coelEpi	NSD1
3.30965e-14	-0.301612	0.561	0.598	9.34314e-10	coelEpi	EPHX1
3.31954e-14	0.0749497	0.083	0.025	9.37107e-10	coelEpi	MOXD1
3.40672e-14	-0.188701	0.236	0.325	9.61718e-10	coelEpi	LRPPRC
3.45024e-14	-0.119586	0.049	0.111	9.74003e-10	coelEpi	CPT1C
3.51942e-14	-0.119518	0.051	0.119	9.93532e-10	coelEpi	ABHD2
3.53166e-14	-0.149536	0.098	0.172	9.96987e-10	coelEpi	ATF7
3.56492e-14	-0.161431	0.166	0.259	1.00638e-09	coelEpi	CNOT1
3.57443e-14	-0.174005	0.238	0.33	1.00906e-09	coelEpi	TSPYL1
3.5981e-14	-0.140739	0.094	0.169	1.01574e-09	coelEpi	TMEM206
3.70018e-14	0.234113	0.475	0.375	1.04456e-09	coelEpi	HIST1H2AC
3.71361e-14	-0.173753	0.089	0.152	1.04835e-09	coelEpi	SLC16A10
3.81824e-14	-0.100343	0.029	0.09	1.07789e-09	coelEpi	SGCG
3.89488e-14	-0.15465	0.122	0.196	1.09952e-09	coelEpi	CDS2
3.94351e-14	-0.153815	0.14	0.22	1.11325e-09	coelEpi	CRAT
3.95387e-14	-0.20246	0.276	0.36	1.11618e-09	coelEpi	BAZ2B
3.99995e-14	-0.0971184	0.024	0.083	1.12919e-09	coelEpi	LINC00467
4.06207e-14	-0.22137	0.718	0.763	1.14672e-09	coelEpi	ITM2C
4.08118e-14	0.564832	0.515	0.453	1.15212e-09	coelEpi	ZFP36
4.22145e-14	-0.158874	0.131	0.213	1.19172e-09	coelEpi	CACHD1
4.24247e-14	-0.161628	0.15	0.232	1.19765e-09	coelEpi	TSPAN9
4.28144e-14	-0.168615	0.204	0.295	1.20865e-09	coelEpi	RAF1
4.42621e-14	-0.187081	0.186	0.264	1.24952e-09	coelEpi	P3H2
4.66333e-14	-0.141885	0.079	0.148	1.31646e-09	coelEpi	GALC
5.13428e-14	-0.161095	0.144	0.232	1.44941e-09	coelEpi	STX16
5.77431e-14	-0.116897	0.058	0.127	1.63009e-09	coelEpi	AC013394.1
5.83859e-14	-0.120022	0.059	0.13	1.64823e-09	coelEpi	KLF7
5.99484e-14	-0.119224	0.061	0.133	1.69234e-09	coelEpi	USP24
6.01985e-14	0.140111	0.36	0.228	1.6994e-09	coelEpi	TP53I13
6.07438e-14	-0.203955	0.126	0.195	1.7148e-09	coelEpi	POMC
[truncated: 72,821 more rows]

## Sheet: 2_TFact_fromscRNA_supporting
p_val	avg_log2FC	pct.1	pct.2	p_val_adj	cluster	TF
0	2.76714	0.841	0.416	0	coelEpi	ZNF423-E
0	2.57053	0.897	0.397	0	coelEpi	BNC2-E
0	2.43036	0.83	0.422	0	coelEpi	MEIS3-E
0	2.41516	0.916	0.407	0	coelEpi	TCF21-E
0	2.30541	0.913	0.414	0	coelEpi	OSR2-E
0	2.21393	0.958	0.416	0	coelEpi	EBF2-E
0	2.1602	0.86	0.423	0	coelEpi	PRDM8-E
0	2.08668	0.877	0.404	0	coelEpi	HEYL-E
0	2.0282	0.833	0.428	0	coelEpi	ZNF469-E
0	2.0221	0.863	0.415	0	coelEpi	ZFHX4-E
0	2.00652	0.884	0.42	0	coelEpi	FOXC2-E
0	1.99429	0.964	0.427	0	coelEpi	BNC1-E
0	1.9354	0.849	0.424	0	coelEpi	TBX2-E
0	1.72152	0.844	0.456	0	coelEpi	HLX-E
0	1.65529	0.906	0.444	0	coelEpi	RFX8-E
0	1.54359	0.934	0.409	0	coelEpi	MYRF-E
0	1.4074	0.926	0.449	0	coelEpi	PRDM16-E
0	0.995112	0.924	0.437	0	coelEpi	NR0B1-B
0	-1.27938	0.102	0.566	0	coelEpi	SMAD7-B
0	-1.58321	0.063	0.576	0	coelEpi	TCF23-E
0	-1.68216	0.042	0.588	0	coelEpi	TBX18-E
0	-1.70232	0.043	0.584	0	coelEpi	FOXS1-E
0	-1.53613	0.074	0.54	0	sKITLG	IRF6-E
0	-1.57464	0.054	0.643	0	sLGR5_female	REST-A
0	1.65752	0.91	0.411	0	ovarianSurf	MYRF-E
0	1.08939	0.919	0.431	0	ovarianSurf	BNC1-E
0	1.70849	0.916	0.424	0	preGC_IIb	CSRNP1-E
0	1.4762	0.937	0.413	0	preGC_IIb	HIF1A-AA
0	1.82595	0.987	0.392	0	Sertoli_WFDC2	GATA6-B
0	1.34592	0.957	0.382	0	Sertoli_WFDC2	NR5A1-AA
0	1.0437	0.947	0.472	0	Sertoli_WFDC2	ZNF536-E
0	-1.13242	0.157	0.551	0	Sertoli_WFDC2	HAND1-E
0	-1.37821	0.08	0.573	0	Sertoli_WFDC2	NR2F2-B
0	-1.52249	0.067	0.517	0	Sertoli_WFDC2	HLX-E
0	-1.74681	0.037	0.576	0	Sertoli_WFDC2	FOXL2-B
0	1.54301	0.93	0.402	0	Sertoli	SOX9-A
0	1.0682	0.995	0.391	0	Sertoli	GATA6-B
0	-1.37288	0.054	0.558	0	Sertoli	ZNF22-E
0	-1.39483	0.054	0.575	0	Sertoli	SSRP1-C
0	-1.40481	0.061	0.579	0	Sertoli	NFKBIL1-E
0	-1.47188	0.06	0.574	0	Sertoli	NR2F2-B
0	-1.49123	0.053	0.538	0	Sertoli	ZNF595-E
0	-1.59693	0.018	0.577	0	Sertoli	FOXL2-B
0	-1.62812	0.026	0.593	0	Sertoli	ZNF581-E
0	-1.63867	0.03	0.52	0	Sertoli	HLX-E
0	-1.6392	0.024	0.558	0	Sertoli	ZNF16-E
6.91692e-323	1.90386	0.856	0.425	9.57993e-320	coelEpi	HAND2-E
3.85371e-322	-1.52125	0.08	0.476	5.33739e-319	sKITLG	MYRF-E
2.36608e-320	-1.49087	0.092	0.496	3.27702e-317	Sertoli_WFDC2	BNC1-E
8.79239e-320	0.978512	0.952	0.472	1.21775e-316	Sertoli	ZNF536-E
3.78217e-319	-1.31172	0.072	0.504	5.23831e-316	Sertoli_WFDC2	NR0B1-B
1.52519e-318	-1.36987	0.063	0.571	2.11239e-315	Sertoli	ZNF277-E
9.72528e-318	2.04691	0.817	0.43	1.34695e-314	coelEpi	PRRX1-E
1.19054e-316	-1.37911	0.058	0.589	1.6489e-313	Sertoli	ZNF32-E
5.1691e-312	-1.38807	0.072	0.541	7.15921e-309	Sertoli	ELF3-B
5.1946e-310	-1.4615	0.07	0.503	7.19452e-307	Sertoli	NPAS3-E
1.55514e-306	1.41133	0.912	0.44	2.15386e-303	preGC_IIb	NFKBIZ-E
2.44922e-303	-1.41303	0.051	0.542	3.39217e-300	Sertoli	MYC-AA
8.72947e-301	2.05725	0.811	0.427	1.20903e-297	coelEpi	TSHZ3-E
3.34152e-294	-1.20118	0.12	0.537	4.628e-291	Sertoli_WFDC2	ELF3-B
4.80002e-293	0.897297	0.93	0.494	6.64802e-290	Sertoli_WFDC2	ETV7-E
1.49791e-283	-1.49563	0.048	0.454	2.0746e-280	coelEpi	NR5A1-AA
8.24773e-283	0.91439	0.913	0.415	1.14231e-279	Sertoli	FOXA2-B
9.31088e-281	1.65999	0.843	0.43	1.28956e-277	coelEpi	MEOX2-E
1.38241e-279	2.2488	0.915	0.442	1.91463e-276	FetalLeydig-like	NR5A2-B
8.6043e-274	-1.26376	0.084	0.559	1.1917e-270	Sertoli	ZNF34-E
1.31927e-272	1.02067	0.891	0.489	1.82718e-269	coelEpi	ZBED2-E
1.18985e-271	-1.34402	0.1	0.507	1.64794e-268	Sertoli_WFDC2	RFX8-E
5.31362e-269	-1.2796	0.073	0.564	7.35936e-266	Sertoli	THAP7-E
7.94398e-269	-1.7145	0.065	0.492	1.10024e-265	FetalLeydig-like	ZNF711-E
1.52625e-264	-1.3974	0.078	0.509	2.11386e-261	Sertoli	RFX8-E
1.37969e-262	-1.45773	0.093	0.506	1.91088e-259	FetalLeydig-like	SOX15-E
2.29723e-262	0.778516	0.939	0.495	3.18167e-259	preGC_IIb	ELK1-AA
2.42701e-260	1.7735	0.822	0.436	3.3614e-257	coelEpi	TSHZ2-E
1.56529e-259	1.7704	0.803	0.417	2.16792e-256	coelEpi	ZFPM2-E
5.12606e-256	1.52194	0.837	0.454	7.0996e-253	coelEpi	SMAD6-E
4.3827e-251	-1.49199	0.071	0.495	6.07005e-248	Sertoli	TSHZ2-E
4.96373e-250	-1.58282	0.064	0.468	6.87477e-247	preGC_IIa	HEYL-E
1.96651e-249	1.21067	0.863	0.44	2.72362e-246	preGC_IIb	EGR3-E
9.96595e-249	-1.04346	0.171	0.526	1.38028e-245	Sertoli_WFDC2	SOX7-E
1.33704e-247	-1.42887	0.082	0.489	1.85181e-244	Sertoli	MEOX2-E
5.17216e-246	1.08853	0.872	0.438	7.16344e-243	preGC_IIb	EPAS1-B
5.54556e-242	2.06775	0.867	0.409	7.68061e-239	FetalLeydig-like	NR5A1-AA
2.76289e-240	0.855567	0.87	0.398	3.8266e-237	Sertoli	FOSL2-A
1.0406e-239	1.00971	0.867	0.465	1.44123e-236	preGC_IIb	ESR1-AA
3.46319e-239	1.27685	0.777	0.363	4.79652e-236	sPAX8e	RARA-AA
1.64068e-237	1.56867	0.802	0.44	2.27235e-234	coelEpi	FOXF1-E
2.57351e-237	-1.49597	0.077	0.477	3.56432e-234	Sertoli	ZFHX4-E
4.8074e-237	1.46776	0.803	0.436	6.65825e-234	coelEpi	FOXL1-E
1.31264e-236	1.5917	0.88	0.475	1.81801e-233	FetalLeydig-like	SIM1-E
8.25039e-234	1.08628	0.917	0.394	1.14268e-230	Sertoli_WFDC2	FOSL2-A
2.6729e-233	-1.17805	0.089	0.576	3.70197e-230	Sertoli	THAP4-E
4.89469e-233	0.810111	0.878	0.441	6.77915e-230	ovarianSurf	NR0B1-B
1.27963e-232	1.05912	0.841	0.461	1.77229e-229	sKITLG	TFCP2L1-E
2.51321e-232	-1.20519	0.083	0.564	3.48079e-229	Sertoli	GTF3A-E
3.78802e-232	1.27394	0.796	0.419	5.24641e-229	granulosa	EOMES-C
5.18333e-231	1.32958	0.823	0.475	7.17891e-228	coelEpi	SOX18-E
7.83402e-230	1.25018	0.771	0.451	1.08501e-226	Sertoli_WFDC2	JARID2-D
2.31972e-229	-1.36029	0.09	0.488	3.21281e-226	Sertoli	ZNF521-E
4.25105e-229	1.26813	0.843	0.435	5.88771e-226	granulosa	ZFP92-E
5.22168e-229	-0.912538	0.171	0.52	7.23203e-226	Sertoli_WFDC2	TWIST2-A
7.73306e-229	-1.42988	0.1	0.486	1.07103e-225	Sertoli	PRRX1-E
9.58948e-229	1.47804	0.804	0.432	1.32814e-225	coelEpi	ZNF521-E
8.94316e-227	-1.17276	0.096	0.563	1.23863e-223	Sertoli	ZNF524-E
1.25506e-225	1.07018	0.826	0.447	1.73826e-222	Sertoli_WFDC2	YBX2-E
2.44369e-225	1.75242	0.808	0.46	3.38451e-222	granulosa	RFX5-AA
4.48354e-224	-1.0187	0.17	0.537	6.2097e-221	sKITLG	HOPX-E
2.6585e-223	-1.16937	0.113	0.537	3.68202e-220	sKITLG	ZNF536-E
3.24837e-223	-1.18152	0.092	0.56	4.49899e-220	Sertoli	PHF5A-E
6.97822e-221	-1.14246	0.127	0.516	9.66484e-218	Sertoli	SPIC-E
2.55295e-220	-1.14217	0.129	0.487	3.53584e-217	Sertoli_WFDC2	ZNF208-E
6.65585e-220	-1.27962	0.027	0.547	9.21835e-217	Sertoli	NR2F6-B
1.35941e-219	0.898552	0.888	0.413	1.88279e-216	granulosa	ZFHX4-E
5.47135e-219	-1.27859	0.068	0.496	7.57782e-216	Sertoli	PITX2-D
8.82274e-219	1.06341	0.817	0.446	1.22195e-215	Sertoli_WFDC2	TOX-E
7.17806e-218	-1.16679	0.152	0.497	9.94162e-215	FetalLeydig-like	DMTF1-E
1.92385e-217	1.10132	0.84	0.453	2.66453e-214	granulosa	USF2-AA
2.60836e-215	-1.01304	0.173	0.533	3.61258e-212	sKITLG	MYCL-E
6.71711e-214	-1.39081	0.093	0.492	9.30319e-211	FetalLeydig-like	PLAG1-E
3.27347e-213	0.792541	0.884	0.461	4.53376e-210	preGC_IIb	ATF6B-D
4.27895e-213	1.15537	0.843	0.438	5.92635e-210	preGC_IIb	STAT3-AA
4.95156e-213	1.4726	0.786	0.44	6.85791e-210	coelEpi	ID4-E
1.40599e-212	1.04493	0.855	0.428	1.9473e-209	granulosa	ZNF521-E
1.7164e-212	-1.15916	0.104	0.543	2.37721e-209	Sertoli	ATF5-E
4.00426e-212	-1.11452	0.136	0.517	5.54589e-209	Sertoli_WFDC2	TOX2-E
9.39233e-212	-1.38122	0.102	0.479	1.30084e-208	FetalLeydig-like	ZFP14-E
2.93854e-211	-1.19164	0.133	0.492	4.06988e-208	FetalLeydig-like	ZNF84-E
7.94346e-211	-1.07801	0.161	0.559	1.10017e-207	preGC_IIb	NKX3-1-D
1.88356e-210	0.649559	0.934	0.493	2.60872e-207	Sertoli	ETV7-E
1.02936e-209	-1.37833	0.159	0.489	1.42566e-206	FetalLeydig-like	ZNF280D-E
2.07953e-208	1.03792	0.844	0.44	2.88015e-205	sPAX8m	NPAS4-E
6.1662e-208	0.785422	0.872	0.484	8.54019e-205	preGC_IIb	CREB3L2-D
6.1662e-208	0.785422	0.872	0.484	8.54019e-205	preGC_IIb	CREB3L3-D
2.03517e-207	-1.15283	0.159	0.504	2.81871e-204	FetalLeydig-like	ZNF721-E
2.06085e-207	0.788263	0.878	0.477	2.85428e-204	sKITLG	MYC-AA
2.99419e-207	0.797342	0.873	0.482	4.14695e-204	preGC_IIb	CREB3L4-D
3.67546e-206	-1.53295	0.087	0.472	5.09051e-203	Sertoli	TCF21-E
4.07883e-205	-1.0116	0.162	0.567	5.64918e-202	preGC_IIb	MXD1-E
8.75096e-204	1.19253	0.876	0.518	1.21201e-200	FetalLeydig-like	PRDM5-E
4.4715e-203	-1.37255	0.119	0.491	6.19302e-200	Sertoli_WFDC2	TSHZ2-E
6.31853e-203	-1.03685	0.178	0.5	8.75117e-200	FetalLeydig-like	ZNF529-E
2.20954e-202	-1.31097	0.133	0.49	3.06022e-199	FetalLeydig-like	TSHZ1-E
5.75694e-202	1.4522	0.752	0.437	7.97336e-199	coelEpi	NPAS1-E
6.82928e-202	-1.22113	0.111	0.486	9.45855e-199	FetalLeydig-like	TOX-E
7.31581e-201	1.08952	0.798	0.451	1.01324e-197	granulosa	TBXT-C
1.33575e-200	-1.10195	0.11	0.561	1.85002e-197	Sertoli	DNAJC1-E
5.6035e-200	-1.2892	0.124	0.487	7.76085e-197	FetalLeydig-like	SALL2-E
7.97126e-200	-1.13411	0.13	0.514	1.10402e-196	Sertoli	SP5-E
1.60315e-199	-1.10459	0.165	0.511	2.22036e-196	FetalLeydig-like	IKZF5-E
5.06072e-199	1.32476	0.867	0.504	7.0091e-196	FetalLeydig-like	MSX1-E
6.34942e-199	-1.07454	0.166	0.489	8.79395e-196	Sertoli_WFDC2	FOXF1-E
1.76702e-198	1.48178	0.822	0.452	2.44733e-195	granulosa	TFEC-E
3.23732e-198	1.11197	0.838	0.432	4.48368e-195	granulosa	ARNT2-E
7.61163e-198	-0.999585	0.187	0.504	1.05421e-194	FetalLeydig-like	CREBZF-E
4.3982e-197	-0.877179	0.154	0.5	6.0915e-194	FetalLeydig-like	PRRX2-E
2.36904e-196	-0.934457	0.166	0.52	3.28112e-193	Sertoli_WFDC2	TWIST1-A
2.63508e-196	-1.09546	0.111	0.536	3.64958e-193	Sertoli	TBPL1-E
1.64821e-195	-0.819739	0.22	0.535	2.28277e-192	Sertoli_WFDC2	CREB3L2-D
1.64821e-195	-0.819739	0.22	0.535	2.28277e-192	Sertoli_WFDC2	CREB3L3-D
1.68636e-195	-1.23695	0.165	0.486	2.33561e-192	FetalLeydig-like	ZNF292-E
1.75873e-195	0.954623	0.911	0.472	2.43583e-192	Sertoli_WFDC2	PPARA-AA
1.3852e-194	1.78051	0.79	0.439	1.9185e-191	granulosa	SMAD9-E
4.90956e-194	1.32528	0.781	0.457	6.79974e-191	coelEpi	HOXA6-E
6.03018e-194	1.31599	0.788	0.444	8.35179e-191	granulosa	ZNF92-D
1.51469e-193	-1.28615	0.13	0.495	2.09785e-190	FetalLeydig-like	ZNF322-E
1.8092e-193	0.763554	0.859	0.472	2.50574e-190	preGC_IIb	FLI1-A
3.18821e-193	-0.917536	0.184	0.516	4.41568e-190	Sertoli_WFDC2	ATF6B-D
4.40061e-193	-1.09665	0.119	0.536	6.09484e-190	Sertoli	ZNF414-E
8.28337e-193	-1.41008	0.124	0.476	1.14725e-189	FetalLeydig-like	SMAD9-E
1.07105e-192	-1.21028	0.139	0.489	1.4834e-189	FetalLeydig-like	ZNF615-E
1.53398e-192	-1.35689	0.113	0.497	2.12456e-189	preGC_IIa	NPAS4-E
3.17867e-192	-1.14919	0.141	0.497	4.40246e-189	FetalLeydig-like	ZNF227-E
4.22075e-192	-1.09009	0.116	0.522	5.84574e-189	Sertoli	THAP10-E
6.50418e-192	-1.07129	0.102	0.487	9.0083e-189	FetalLeydig-like	SOX8-E
2.0634e-191	-0.107056	0.167	0.49	2.85782e-188	FetalLeydig-like	GLIS3-E
5.24447e-191	-1.21257	0.135	0.469	7.26359e-188	FetalLeydig-like	PRRX1-E
2.07983e-190	0.757441	0.868	0.474	2.88057e-187	sKITLG	ZNF595-E
3.42652e-190	-1.34988	0.126	0.474	4.74573e-187	FetalLeydig-like	ZFP30-E
3.72246e-190	1.03887	0.812	0.447	5.15561e-187	Sertoli_WFDC2	HNF4G-C
3.92523e-190	-1.24802	0.111	0.487	5.43645e-187	FetalLeydig-like	RORC-E
1.94872e-189	-1.04498	0.172	0.523	2.69897e-186	sKITLG	IRX2-E
2.0184e-189	-1.06357	0.15	0.479	2.79548e-186	FetalLeydig-like	ZSCAN30-E
6.03705e-189	-1.31058	0.15	0.48	8.36131e-186	FetalLeydig-like	ZNF510-E
1.5669e-188	-1.28179	0.139	0.492	2.17016e-185	FetalLeydig-like	ZBTB26-E
3.15697e-188	1.19312	0.826	0.518	4.3724e-185	FetalLeydig-like	RCOR3-E
5.14792e-188	-1.17039	0.146	0.478	7.12987e-185	FetalLeydig-like	SOX5-E
1.70467e-187	1.21209	0.776	0.414	2.36097e-184	Sertoli_WFDC2	SOX9-A
5.11946e-187	2.37743	0.826	0.474	7.09045e-184	FetalLeydig-like	NR1I3-D
7.47178e-187	-1.08375	0.127	0.542	1.03484e-183	Sertoli	ZNF358-E
1.54924e-186	-0.971328	0.17	0.495	2.1457e-183	FetalLeydig-like	ZNF160-E
1.58976e-186	-1.2685	0.163	0.488	2.20182e-183	FetalLeydig-like	ZBTB44-E
2.99644e-186	0.902664	0.847	0.429	4.15007e-183	granulosa	MEOX2-E
3.57043e-186	-1.1397	0.098	0.508	4.94504e-183	Sertoli	ZNF691-E
4.09612e-186	-1.15901	0.137	0.494	5.67312e-183	FetalLeydig-like	NFIX-E
6.2127e-186	-1.15136	0.161	0.483	8.60459e-183	FetalLeydig-like	MIER3-E
7.83718e-186	-0.95135	0.159	0.497	1.08545e-182	FetalLeydig-like	SOX4-E
9.17075e-186	-1.30131	0.107	0.449	1.27015e-182	ovarianSurf	NR5A1-AA
2.09119e-185	-1.10928	0.167	0.492	2.89629e-182	FetalLeydig-like	ARID4B-E
2.56323e-185	-1.40406	0.127	0.481	3.55007e-182	Sertoli	TSHZ3-E
2.96171e-185	0.961289	0.829	0.462	4.10196e-182	granulosa	TOX2-E
6.04019e-185	-0.701847	0.253	0.537	8.36566e-182	coelEpi	MSX1-E
7.33643e-185	-1.09057	0.176	0.481	1.0161e-181	FetalLeydig-like	VEZF1-E
7.59663e-185	-1.21503	0.117	0.488	1.05213e-181	FetalLeydig-like	PEG3-E
8.87996e-185	0.635165	0.907	0.386	1.22987e-181	Sertoli	NR5A1-AA
1.36975e-184	-1.19916	0.143	0.472	1.8971e-181	FetalLeydig-like	ZNF445-E
1.72077e-184	0.946409	0.83	0.436	2.38327e-181	granulosa	TSHZ2-E
2.11348e-184	0.708983	0.871	0.491	2.92717e-181	sKITLG	ZNF16-E
2.30579e-184	1.10884	0.831	0.415	3.19352e-181	granulosa	ZFPM2-E
3.20107e-184	-1.03479	0.141	0.485	4.43348e-181	FetalLeydig-like	ZNF182-E
4.60689e-184	0.856094	0.893	0.554	6.38054e-181	sPAX8m	ERG-AA
5.23853e-184	-1.13753	0.122	0.484	7.25537e-181	FetalLeydig-like	ZNF853-E
7.77158e-184	1.26235	0.863	0.494	1.07636e-180	FetalLeydig-like	ZNF540-E
8.01868e-184	1.17125	0.874	0.518	1.11059e-180	FetalLeydig-like	TRPS1-E
8.69358e-184	-1.33723	0.159	0.475	1.20406e-180	FetalLeydig-like	ZBTB41-E
1.40331e-183	1.69817	0.713	0.445	1.94358e-180	coelEpi	GLIS2-E
2.14599e-183	1.16248	0.841	0.511	2.97219e-180	FetalLeydig-like	ZNF431-E
2.58278e-183	-1.16102	0.137	0.496	3.57715e-180	FetalLeydig-like	PRDM6-E
3.25531e-183	-0.785587	0.223	0.533	4.5086e-180	Sertoli_WFDC2	CREB3L4-D
5.89702e-183	-1.18622	0.163	0.491	8.16737e-180	FetalLeydig-like	BBX-E
6.29633e-183	1.13175	0.835	0.519	8.72041e-180	FetalLeydig-like	ZNF397-E
9.29719e-183	1.13741	0.76	0.471	1.28766e-179	Sertoli_WFDC2	SALL1-E
1.15545e-182	-1.02856	0.165	0.501	1.6003e-179	FetalLeydig-like	ZNF141-E
1.20082e-182	-1.29066	0.159	0.482	1.66314e-179	FetalLeydig-like	PURA-E
1.5469e-182	0.74223	0.882	0.452	2.14246e-179	sPAX8m	PRDM16-E
3.2821e-182	-1.05349	0.154	0.489	4.54572e-179	FetalLeydig-like	ZNF226-E
3.76976e-182	-1.22306	0.148	0.479	5.22111e-179	FetalLeydig-like	ZNF585A-E
6.07878e-182	-0.944229	0.18	0.502	8.41911e-179	FetalLeydig-like	ZNF354B-E
9.24456e-182	-0.969275	0.163	0.51	1.28037e-178	FetalLeydig-like	AEBP2-E
4.00742e-181	1.11483	0.833	0.522	5.55028e-178	FetalLeydig-like	ZNF354C-E
1.28849e-180	1.80243	0.707	0.453	1.78456e-177	coelEpi	JDP2-E
1.54016e-180	0.982687	0.811	0.457	2.13312e-177	coelEpi	SP3-AA
2.83296e-180	-1.03179	0.185	0.492	3.92365e-177	FetalLeydig-like	FOXJ3-E
4.73255e-180	1.2903	0.82	0.499	6.55459e-177	FetalLeydig-like	NR2C1-E
7.78984e-180	-0.676754	0.263	0.546	1.07889e-176	Sertoli_WFDC2	SRF-A
1.71198e-179	1.63655	0.729	0.47	2.3711e-176	coelEpi	PRRX2-E
2.27171e-179	-0.934078	0.17	0.501	3.14631e-176	FetalLeydig-like	ZBED5-E
3.77755e-179	1.20814	0.828	0.506	5.2319e-176	FetalLeydig-like	RFX3-E
5.3698e-179	-1.0819	0.157	0.489	7.43717e-176	FetalLeydig-like	KAT7-E
5.90022e-179	0.756157	0.85	0.483	8.17181e-176	sPAX8m	FOXE1-E
6.16898e-179	-1.35165	0.104	0.477	8.54403e-176	FetalLeydig-like	TSHZ2-E
1.18205e-178	1.15367	0.841	0.512	1.63714e-175	FetalLeydig-like	ZBTB1-E
2.14974e-178	-0.983648	0.163	0.488	2.97738e-175	FetalLeydig-like	RBAK-E
4.09337e-178	-1.03861	0.165	0.494	5.66931e-175	FetalLeydig-like	ZNF791-E
4.86225e-178	-1.1131	0.13	0.504	6.73422e-175	Sertoli	ZNF213-E
8.85274e-178	-1.18684	0.17	0.48	1.2261e-174	FetalLeydig-like	ZNF507-E
1.13686e-177	1.20696	0.758	0.433	1.57455e-174	Sertoli_WFDC2	ZNF860-E
2.13607e-177	-1.03361	0.127	0.525	2.95846e-174	Sertoli	ZBTB45-E
2.19817e-177	1.01168	0.804	0.481	3.04447e-174	coelEpi	EBF3-E
2.49143e-177	1.21224	0.806	0.445	3.45063e-174	preGC_IIb	ZBTB21-E
3.33494e-177	1.23842	0.828	0.501	4.61889e-174	FetalLeydig-like	ZNF224-E
1.77449e-175	-1.22483	0.148	0.485	2.45766e-172	FetalLeydig-like	ZNF283-E
2.51393e-175	1.3564	0.781	0.435	3.48179e-172	granulosa	KLF7-E
3.14969e-175	-1.27969	0.133	0.488	4.36232e-172	FetalLeydig-like	ZNF571-E
5.48405e-175	1.22819	0.784	0.458	7.5954e-172	granulosa	LHX6-E
7.67945e-175	-1.31345	0.122	0.483	1.0636e-171	FetalLeydig-like	ZNF618-E
9.0959e-175	-1.12158	0.122	0.473	1.25978e-171	FetalLeydig-like	ARNT2-E
9.31039e-175	-1.1388	0.172	0.483	1.28949e-171	FetalLeydig-like	ZNF33A-E
1.00388e-174	1.15983	0.833	0.402	1.39038e-171	Sertoli	POU2F2-B
2.83108e-174	-1.09935	0.176	0.489	3.92104e-171	FetalLeydig-like	CNOT4-E
2.83576e-174	-1.24312	0.136	0.495	3.92753e-171	sKITLG	NPAS4-E
3.62016e-174	0.986278	0.803	0.482	5.01392e-171	coelEpi	TCF15-E
3.7719e-174	-1.12865	0.146	0.494	5.22409e-171	FetalLeydig-like	ZNF302-E
4.42157e-174	-0.901464	0.209	0.498	6.12387e-171	FetalLeydig-like	ZNF333-E
4.43624e-174	-1.00172	0.137	0.522	6.1442e-171	Sertoli	ZNF777-E
1.0797e-173	-1.27717	0.107	0.497	1.49538e-170	FetalLeydig-like	GATA5-E
1.62322e-173	1.07587	0.843	0.519	2.24815e-170	FetalLeydig-like	ZNF383-E
4.23722e-173	-1.19649	0.154	0.48	5.86856e-170	FetalLeydig-like	THAP6-E
4.52222e-173	-1.00732	0.178	0.498	6.26327e-170	FetalLeydig-like	ZNF451-E
6.55923e-173	-0.862762	0.15	0.465	9.08454e-170	FetalLeydig-like	TSHZ3-E
2.3067e-172	-1.12242	0.174	0.486	3.19478e-169	FetalLeydig-like	HMG20A-E
5.76522e-172	-1.07284	0.17	0.512	7.98483e-169	FetalLeydig-like	ZNF548-E
5.95909e-172	-1.13626	0.17	0.485	8.25334e-169	FetalLeydig-like	ZNF37A-E
8.34932e-172	0.854499	0.858	0.476	1.15638e-168	Sertoli	PPARA-AA
1.51623e-171	-1.22425	0.147	0.516	2.09998e-168	Sertoli	PRRX2-E
2.0796e-171	-0.985752	0.128	0.491	2.88025e-168	FetalLeydig-like	ZNF493-E
5.15648e-171	-0.989271	0.172	0.491	7.14173e-168	FetalLeydig-like	ZNF654-E
6.36257e-171	1.01912	0.898	0.514	8.81215e-168	FetalLeydig-like	ZNF568-E
7.68467e-171	-1.13972	0.146	0.494	1.06433e-167	FetalLeydig-like	ZNF350-E
3.97378e-170	-1.06243	0.165	0.485	5.50368e-167	FetalLeydig-like	ZBTB25-E
3.99706e-170	-1.13246	0.163	0.477	5.53593e-167	FetalLeydig-like	ZXDB-E
5.67705e-170	-1.12279	0.141	0.51	7.86271e-167	sKITLG	PRDM16-E
1.02412e-169	1.25011	0.763	0.437	1.41841e-166	granulosa	SOX11-C
1.0669e-169	0.865105	0.841	0.487	1.47766e-166	granulosa	IRF7-D
1.27536e-169	1.09694	0.803	0.463	1.76637e-166	coelEpi	FOSL1-B
1.36888e-169	-1.3902	0.12	0.478	1.8959e-166	FetalLeydig-like	ZNF677-E
1.39129e-169	-0.991893	0.17	0.486	1.92694e-166	FetalLeydig-like	ZNF621-E
1.39588e-169	-1.03329	0.137	0.535	1.9333e-166	Sertoli	NRL-E
1.43345e-169	0.854484	0.818	0.42	1.98532e-166	sKITLG	ZNF485-E
2.64548e-169	-1.12233	0.14	0.494	3.66398e-166	Sertoli	ZNF610-E
4.20111e-169	0.983883	0.806	0.45	5.81854e-166	preGC_IIb	ATF4-AA
4.20676e-169	-1.13453	0.087	0.56	5.82637e-166	Sertoli	NR2F1-B
7.04702e-169	0.928177	0.837	0.494	9.76013e-166	ovarianSurf	DNMT3A-D
8.78922e-169	-0.828129	0.133	0.476	1.21731e-165	FetalLeydig-like	ID4-E
9.02568e-169	-1.21038	0.137	0.476	1.25006e-165	FetalLeydig-like	ZNF467-E
9.41027e-169	0.607669	0.876	0.51	1.30332e-165	coelEpi	FOXL2-B
1.19744e-168	1.09779	0.843	0.516	1.65845e-165	FetalLeydig-like	ZNF91-E
1.05391e-167	-1.22413	0.135	0.476	1.45967e-164	FetalLeydig-like	ZNF347-E
1.10341e-167	0.880957	0.779	0.437	1.52822e-164	Sertoli_WFDC2	ARNT2-E
1.74298e-167	-1.25006	0.143	0.488	2.41403e-164	FetalLeydig-like	ZNF680-E
2.22877e-167	-1.03918	0.124	0.532	3.08685e-164	Sertoli	THAP3-E
2.25121e-167	1.1466	0.765	0.45	3.11793e-164	coelEpi	EMX2-E
2.37252e-167	-1.01727	0.138	0.525	3.28594e-164	Sertoli	MLX-E
2.87978e-167	-1.15928	0.143	0.486	3.9885e-164	FetalLeydig-like	ZNF484-E
1.08048e-166	-0.908434	0.202	0.525	1.49647e-163	Sertoli_WFDC2	HOXB6-E
2.00949e-166	-1.11682	0.161	0.486	2.78314e-163	FetalLeydig-like	ZNF136-E
3.91369e-166	0.939836	0.822	0.446	5.42045e-163	granulosa	TOX-E
4.6488e-166	-1.09362	0.161	0.495	6.43859e-163	FetalLeydig-like	ZNF345-E
6.46315e-166	-0.977313	0.156	0.546	8.95146e-163	sKITLG	BARX2-E
8.68653e-166	-1.11024	0.185	0.482	1.20308e-162	FetalLeydig-like	MGA-E
1.62946e-165	0.666966	0.85	0.472	2.2568e-162	Sertoli	YBX3-E
2.3018e-165	0.571818	0.911	0.53	3.188e-162	granulosa	HOXC11-D
2.4336e-165	-0.883164	0.167	0.492	3.37053e-162	FetalLeydig-like	ZNF506-E
1.10262e-164	-0.571597	0.269	0.583	1.52712e-161	Sertoli_WFDC2	ESR2-A
1.34763e-164	-1.17983	0.174	0.471	1.86646e-161	FetalLeydig-like	ZNF532-E
1.55654e-164	-1.09633	0.153	0.492	2.15581e-161	Sertoli_WFDC2	STAT3-AA
2.13111e-164	0.885063	0.822	0.461	2.95159e-161	sPAX8m	FOSL1-B
2.22495e-164	1.14774	0.767	0.449	3.08156e-161	granulosa	NPAS3-E
5.27299e-164	-1.16562	0.143	0.478	7.3031e-161	FetalLeydig-like	ZNF518A-E
9.27734e-164	-0.981217	0.18	0.484	1.28491e-160	FetalLeydig-like	PRDM2-E
1.4137e-163	1.06207	0.785	0.438	1.95798e-160	preGC_IIb	NFKBID-E
1.96191e-163	-1.31452	0.115	0.472	2.71725e-160	FetalLeydig-like	ZSCAN12-E
3.43896e-163	-1.18045	0.135	0.478	4.76296e-160	FetalLeydig-like	ZFP62-E
4.28394e-163	-0.868087	0.193	0.495	5.93325e-160	FetalLeydig-like	ZNF655-E
4.99248e-163	-0.993691	0.14	0.555	6.91458e-160	Sertoli	ZNF787-E
5.37337e-163	-1.01356	0.167	0.497	7.44211e-160	coelEpi	CLOCK-B
9.45689e-163	-1.04385	0.157	0.518	1.30978e-159	sPAX8e	SALL1-E
1.06182e-162	-1.06047	0.141	0.477	1.47062e-159	FetalLeydig-like	ZNF736-E
1.17718e-162	-1.00297	0.165	0.483	1.6304e-159	FetalLeydig-like	ZNF248-E
1.69218e-162	-0.659986	0.183	0.494	2.34367e-159	FetalLeydig-like	ZNF337-E
2.34497e-162	0.628262	0.855	0.46	3.24779e-159	Sertoli	SIM1-E
3.62301e-162	-1.05417	0.131	0.49	5.01787e-159	Sertoli_WFDC2	TFAP2C-A
4.39472e-162	-0.907036	0.125	0.484	6.08668e-159	sPAX8m	ZNF81-E
6.40579e-162	-1.21213	0.13	0.479	8.87202e-159	FetalLeydig-like	ZNF674-E
9.15794e-162	-1.0897	0.18	0.487	1.26838e-158	FetalLeydig-like	KAT6B-E
1.61412e-161	-1.02732	0.148	0.505	2.23555e-158	Sertoli	ZNF627-E
1.74e-161	1.26245	0.824	0.505	2.4099e-158	FetalLeydig-like	ZHX1-D
2.02741e-161	-1.28836	0.157	0.473	2.80797e-158	Sertoli_WFDC2	OSR2-E
2.05581e-161	-0.980388	0.196	0.509	2.84729e-158	Sertoli_WFDC2	TFDP1-B
4.22146e-161	-1.08187	0.127	0.491	5.84673e-158	Sertoli	HOMEZ-E
4.45513e-161	1.04813	0.772	0.469	6.17035e-158	coelEpi	HOXC6-E
1.15756e-160	1.16145	0.824	0.513	1.60322e-157	FetalLeydig-like	ZBED6-E
1.42661e-160	-0.853695	0.207	0.501	1.97586e-157	Sertoli_WFDC2	DLX5-E
2.12672e-160	1.06674	0.753	0.459	2.94551e-157	Sertoli_WFDC2	PAX2-E
2.42607e-160	0.840389	0.839	0.476	3.36011e-157	sPAX8m	HNF4A-AA
5.7317e-160	-1.23004	0.12	0.484	7.9384e-157	FetalLeydig-like	ZNF420-E
6.63491e-160	-0.999762	0.156	0.554	9.18936e-157	Sertoli_WFDC2	NR2F1-B
7.24289e-160	-1.06426	0.167	0.492	1.00314e-156	FetalLeydig-like	ZNF140-E
9.6211e-160	-1.03954	0.128	0.505	1.33252e-156	Sertoli	ZNF408-E
1.37585e-159	1.12271	0.854	0.508	1.90556e-156	FetalLeydig-like	PATZ1-E
2.69247e-159	0.929377	0.808	0.437	3.72908e-156	granulosa	MKX-E
2.77584e-159	-0.759364	0.154	0.484	3.84454e-156	FetalLeydig-like	ZNF514-E
3.54354e-159	-0.787311	0.17	0.507	4.9078e-156	FetalLeydig-like	ZNF394-E
5.95335e-159	-1.02726	0.161	0.481	8.24539e-156	FetalLeydig-like	ZNF891-E
7.94621e-159	0.72852	0.836	0.497	1.10055e-155	sPAX8e	HAND1-E
8.23559e-159	-0.983536	0.175	0.51	1.14063e-155	Sertoli_WFDC2	SP5-E
1.36356e-158	-1.01078	0.137	0.528	1.88853e-155	Sertoli	THAP8-E
1.76556e-158	-1.29451	0.13	0.474	2.44531e-155	FetalLeydig-like	ZNF678-E
1.97027e-158	-1.02275	0.15	0.511	2.72883e-155	Sertoli	ZNF415-E
2.35671e-158	-1.22562	0.128	0.476	3.26405e-155	FetalLeydig-like	ZNF527-E
2.47068e-158	-1.1803	0.128	0.496	3.4219e-155	FetalLeydig-like	POU3F1-E
3.34286e-158	-0.931864	0.185	0.48	4.62986e-155	FetalLeydig-like	ZBTB38-E
5.74871e-158	0.989857	0.801	0.444	7.96196e-155	Sertoli	IKZF1-C
7.50192e-158	-0.977916	0.176	0.523	1.03902e-154	sKITLG	IRX1-E
8.73214e-158	-0.928987	0.189	0.496	1.2094e-154	FetalLeydig-like	ZKSCAN8-E
9.07436e-158	-0.853938	0.155	0.536	1.2568e-154	Sertoli	CREBL2-E
3.10047e-157	-1.18342	0.163	0.469	4.29415e-154	FetalLeydig-like	ZBTB37-E
5.89655e-157	-1.38312	0.122	0.471	8.16672e-154	FetalLeydig-like	ZNF776-E
1.13909e-156	-0.966084	0.132	0.498	1.57763e-153	Sertoli	NR1D1-B
1.59665e-156	-1.12037	0.157	0.51	2.21136e-153	Sertoli	HOXB2-E
2.01149e-156	1.31641	0.798	0.487	2.78591e-153	FetalLeydig-like	SIX6-E
2.13917e-156	-0.88883	0.152	0.471	2.96275e-153	FetalLeydig-like	NFIB-E
2.58106e-156	-1.25345	0.133	0.476	3.57476e-153	FetalLeydig-like	MECOM-E
2.58784e-156	1.12696	0.833	0.511	3.58416e-153	FetalLeydig-like	FOXP1-B
2.94497e-156	-1.1862	0.167	0.477	4.07878e-153	FetalLeydig-like	ZXDA-E
7.9172e-156	0.659409	0.855	0.482	1.09653e-152	preGC_IIb	ATF2-AA
1.04875e-155	0.829051	0.851	0.509	1.45251e-152	sPAX8e	KLF2-B
1.52862e-155	-1.21989	0.176	0.473	2.11713e-152	FetalLeydig-like	RFX7-E
1.82607e-155	1.29801	0.755	0.442	2.52911e-152	granulosa	MECOM-E
2.76649e-155	0.700497	0.844	0.483	3.83159e-152	sPAX8e	FOXE1-E
1.62606e-154	0.885063	0.795	0.454	2.25209e-151	Sertoli_WFDC2	RXRB-D
2.73636e-154	-0.950051	0.192	0.524	3.78986e-151	preGC_IIb	ID2-E
2.87701e-154	-1.04153	0.17	0.487	3.98466e-151	FetalLeydig-like	ZBTB5-E
2.95982e-154	-1.09512	0.054	0.505	4.09935e-151	Sertoli	NR0B1-B
5.4241e-154	-1.03543	0.183	0.494	7.51238e-151	FetalLeydig-like	ZNF25-E
5.48335e-154	-0.944695	0.172	0.485	7.59444e-151	FetalLeydig-like	PURB-E
5.52501e-154	0.777472	0.788	0.489	7.65213e-151	Sertoli_WFDC2	ZNF382-B
5.80765e-154	-0.951897	0.18	0.497	8.04359e-151	FetalLeydig-like	KAT6A-E
9.39661e-154	-0.882828	0.191	0.524	1.30143e-150	Sertoli_WFDC2	FLI1-A
9.78955e-154	-1.0186	0.183	0.487	1.35585e-150	FetalLeydig-like	RC3H2-E
1.53808e-153	0.991343	0.758	0.44	2.13024e-150	granulosa	EBF1-C
4.61286e-153	-1.15335	0.148	0.47	6.38882e-150	FetalLeydig-like	ZNF430-E
5.2357e-153	-1.14401	0.109	0.471	7.25145e-150	FetalLeydig-like	ZNF521-E
1.81764e-152	-1.00742	0.15	0.525	2.51743e-149	Sertoli	ZNF575-E
3.33529e-152	0.623373	0.877	0.418	4.61938e-149	Sertoli_WFDC2	FOXA2-B
5.10997e-152	1.19563	0.752	0.448	7.07731e-149	preGC_IIb	ZNF331-E
5.58555e-152	-0.909195	0.176	0.482	7.73598e-149	FetalLeydig-like	ELMSAN1-E
5.86138e-152	-0.885617	0.186	0.519	8.11802e-149	coelEpi	CEBPA-AA
6.99967e-152	-1.118	0.141	0.483	9.69455e-149	FetalLeydig-like	ZBTB14-E
1.02032e-151	-1.18227	0.152	0.49	1.41314e-148	FetalLeydig-like	ZNF134-E
1.61379e-151	-1.17778	0.15	0.476	2.2351e-148	FetalLeydig-like	ZNF623-E
3.38587e-151	-1.04574	0.152	0.49	4.68942e-148	FetalLeydig-like	ZNF614-E
5.16193e-151	1.16933	0.748	0.457	7.14927e-148	granulosa	TSHZ1-E
6.91828e-151	-0.63724	0.189	0.478	9.58181e-148	FetalLeydig-like	L3MBTL1-E
1.0591e-150	-1.09651	0.165	0.48	1.46686e-147	FetalLeydig-like	ZFP90-E
1.19196e-150	1.46084	0.742	0.442	1.65086e-147	coelEpi	MKX-E
1.43498e-150	-1.07475	0.161	0.474	1.98745e-147	FetalLeydig-like	ZNF75D-E
1.88915e-150	0.593749	0.854	0.491	2.61647e-147	Sertoli	BARX2-E
3.93945e-150	-0.928574	0.154	0.485	5.45614e-147	FetalLeydig-like	ZBTB6-E
8.46745e-150	-0.9939	0.172	0.478	1.17274e-146	FetalLeydig-like	ZNF280C-E
1.10946e-149	1.18004	0.804	0.506	1.53661e-146	FetalLeydig-like	KLF12-E
1.17733e-149	0.768449	0.831	0.408	1.6306e-146	sPAX8m	HEYL-E
1.57686e-149	-0.842053	0.2	0.513	2.18395e-146	FetalLeydig-like	SMARCA1-E
1.65537e-149	1.26945	0.802	0.484	2.29269e-146	FetalLeydig-like	DMRT1-E
1.76398e-149	-1.14496	0.152	0.483	2.44311e-146	FetalLeydig-like	ZNF234-E
2.13199e-149	-1.02179	0.152	0.508	2.9528e-146	Sertoli	ZNF205-E
2.87881e-149	-0.990462	0.191	0.491	3.98715e-146	FetalLeydig-like	ARID4A-E
2.94811e-149	1.01035	0.777	0.45	4.08313e-146	granulosa	ZNF584-D
4.38033e-149	0.821954	0.797	0.462	6.06675e-146	coelEpi	NFIC-A
8.97483e-149	-0.924058	0.172	0.525	1.24301e-145	Sertoli	ARNT-A
1.0174e-148	-0.864786	0.163	0.496	1.40909e-145	FetalLeydig-like	HMGXB4-E
1.04523e-148	-0.969578	0.161	0.494	1.44765e-145	sPAX8m	ZNF587-E
1.36176e-148	-0.800947	0.252	0.539	1.88604e-145	Sertoli_WFDC2	ZBED2-E
1.54976e-148	-1.15781	0.167	0.483	2.14642e-145	FetalLeydig-like	ZNF320-E
1.97106e-148	-1.36671	0.133	0.48	2.72992e-145	Sertoli	PRDM8-E
3.36028e-148	-0.953023	0.15	0.535	4.65399e-145	Sertoli	ZNF511-E
4.13892e-148	-0.937825	0.185	0.486	5.73241e-145	FetalLeydig-like	PBRM1-E
6.72112e-148	-1.10713	0.152	0.478	9.30875e-145	FetalLeydig-like	HDX-E
7.16474e-148	-1.13842	0.148	0.477	9.92317e-145	FetalLeydig-like	ZSCAN26-E
8.18945e-148	-1.09907	0.163	0.484	1.13424e-144	FetalLeydig-like	ZNF260-E
8.27459e-148	-0.757656	0.189	0.492	1.14603e-144	FetalLeydig-like	ZNF841-E
1.56321e-147	-1.39392	0.113	0.477	2.16505e-144	FetalLeydig-like	CSRNP3-E
1.88528e-147	-1.10084	0.146	0.487	2.61111e-144	FetalLeydig-like	ZNF569-E
2.54577e-147	-0.697005	0.161	0.488	3.52589e-144	sPAX8m	KDM2A-E
3.31306e-147	-1.00294	0.178	0.495	4.58859e-144	FetalLeydig-like	HOXA11-E
3.51717e-147	-1.01914	0.18	0.491	4.87128e-144	FetalLeydig-like	ZNF250-E
6.10443e-147	-1.04646	0.135	0.5	8.45464e-144	FetalLeydig-like	MSX2-E
8.01436e-147	-1.06221	0.165	0.501	1.10999e-143	FetalLeydig-like	NKX6-1-E
8.6776e-147	1.05137	0.865	0.509	1.20185e-143	FetalLeydig-like	TBX3-E
1.19316e-146	1.09678	0.723	0.438	1.65252e-143	Sertoli	NFATC1-B
1.20364e-146	-0.962827	0.163	0.48	1.66705e-143	FetalLeydig-like	ZNF780B-E
1.48948e-146	-1.29083	0.109	0.47	2.06292e-143	FetalLeydig-like	ZNF180-E
7.47829e-146	-0.934854	0.189	0.5	1.03574e-142	FetalLeydig-like	HOXD12-E
7.57999e-146	1.18551	0.751	0.449	1.04983e-142	granulosa	HOXB3-E
1.02928e-145	0.509029	0.873	0.422	1.42555e-142	granulosa	EBF2-E
2.23255e-145	0.721984	0.841	0.451	3.09209e-142	Sertoli	HOXB9-E
3.09947e-145	-0.899041	0.157	0.499	4.29276e-142	FetalLeydig-like	ZNF512-E
1.18945e-144	-1.22235	0.093	0.54	1.64738e-141	FetalLeydig-like	NR2F1-B
1.2454e-144	-0.81308	0.234	0.521	1.72488e-141	Sertoli_WFDC2	STAT6-A
1.81821e-144	-0.974916	0.165	0.508	2.51822e-141	Sertoli	ZNF836-E
3.92758e-144	-0.904951	0.143	0.456	5.4397e-141	FetalLeydig-like	ZFPM2-E
4.09275e-144	0.638752	0.827	0.53	5.66846e-141	ovarianSurf	ZNF581-E
4.58395e-144	-0.973611	0.147	0.531	6.34877e-141	Sertoli	PSPC1-E
6.67258e-144	-1.22158	0.1	0.485	9.24152e-141	FetalLeydig-like	NPAS3-E
6.80883e-144	-0.955763	0.166	0.528	9.43023e-141	Sertoli	ZNF580-E
7.27575e-144	1.53671	0.698	0.449	1.00769e-140	coelEpi	HOXC4-E
1.00395e-143	-1.00457	0.175	0.506	1.39047e-140	Sertoli_WFDC2	PAX6-B
1.42946e-143	0.676414	0.821	0.516	1.97981e-140	Sertoli_WFDC2	TCF23-E
1.44857e-143	-1.29202	0.109	0.47	2.00627e-140	FetalLeydig-like	ZNF780A-E
1.92077e-143	-0.875024	0.157	0.501	2.66027e-140	FetalLeydig-like	THAP5-E
2.42557e-143	-0.917815	0.183	0.483	3.35942e-140	FetalLeydig-like	ZNF662-E
3.62204e-143	-0.611602	0.17	0.475	5.01652e-140	FetalLeydig-like	GLIS2-E
5.09623e-143	-1.07877	0.127	0.474	7.05827e-140	Sertoli	ZNF485-E
5.35906e-143	-1.0955	0.139	0.497	7.42229e-140	FetalLeydig-like	ZNF33B-E
7.24632e-143	-0.935412	0.176	0.505	1.00362e-139	Sertoli_WFDC2	TFAP2A-AA
9.42036e-143	-0.799734	0.187	0.467	1.30472e-139	FetalLeydig-like	ZFHX3-E
1.18679e-142	1.21873	0.811	0.489	1.6437e-139	FetalLeydig-like	ID2-E
1.49124e-142	-0.83755	0.174	0.492	2.06537e-139	FetalLeydig-like	SP100-E
1.84373e-142	0.668538	0.827	0.453	2.55357e-139	sKITLG	DNAJC2-E
2.56499e-142	-0.930953	0.183	0.482	3.55251e-139	FetalLeydig-like	PHTF2-E
3.39774e-142	1.23631	0.811	0.498	4.70587e-139	FetalLeydig-like	BHLHE41-E
5.56808e-142	0.659099	0.831	0.465	7.7118e-139	sKITLG	LYAR-E
6.72041e-142	-0.828357	0.191	0.512	9.30777e-139	FetalLeydig-like	HSF4-E
1.07893e-141	-1.02929	0.167	0.496	1.49432e-138	FetalLeydig-like	ZNF10-E
1.16575e-141	1.25928	0.742	0.435	1.61456e-138	granulosa	ZFHX3-E
1.31487e-141	1.12396	0.815	0.502	1.8211e-138	FetalLeydig-like	GATAD2B-E
2.15349e-141	-1.03193	0.161	0.492	2.98258e-138	FetalLeydig-like	RREB1-E
3.14748e-141	-1.15234	0.159	0.472	4.35926e-138	FetalLeydig-like	ZNF45-E
3.75119e-141	-1.12268	0.159	0.473	5.1954e-138	FetalLeydig-like	ZNF417-E
4.41827e-141	-0.974914	0.185	0.481	6.11931e-138	FetalLeydig-like	ZNF407-E
4.71809e-141	0.743774	0.8	0.446	6.53456e-138	granulosa	PKNOX2-E
7.04677e-141	-1.00975	0.167	0.48	9.75977e-138	FetalLeydig-like	ZNF518B-E
1.41794e-140	-1.19364	0.152	0.467	1.96384e-137	FetalLeydig-like	ZBTB34-E
1.64552e-140	0.587927	0.863	0.474	2.27904e-137	Sertoli	HNF4A-AA
1.8035e-140	-0.778057	0.18	0.485	2.49784e-137	FetalLeydig-like	ZNF131-E
1.91869e-140	-0.908258	0.186	0.533	2.65739e-137	sKITLG	FOXN4-E
3.21856e-140	-0.957427	0.128	0.472	4.4577e-137	FetalLeydig-like	ZNF546-E
4.98819e-140	0.870538	0.796	0.517	6.90864e-137	coelEpi	NR2F2-B
5.12707e-140	-0.918171	0.193	0.505	7.10099e-137	FetalLeydig-like	ZFP1-E
5.8277e-140	0.859455	0.732	0.399	8.07137e-137	coelEpi	KLF10-D
6.22377e-140	-1.00281	0.198	0.49	8.61992e-137	sKITLG	CASZ1-E
8.3724e-140	-1.0692	0.174	0.485	1.15958e-136	FetalLeydig-like	NKX3-2-E
8.51732e-140	-0.716942	0.253	0.548	1.17965e-136	Sertoli_WFDC2	GRHL3-E
1.22013e-139	0.842436	0.768	0.455	1.68987e-136	Sertoli_WFDC2	RXRG-D
1.30136e-139	-0.816093	0.191	0.498	1.80238e-136	FetalLeydig-like	ZNF770-E
1.70603e-139	-0.885253	0.185	0.49	2.36286e-136	FetalLeydig-like	KMT2A-C
1.79894e-139	-1.16675	0.13	0.489	2.49153e-136	FetalLeydig-like	GCM2-E
2.30798e-139	-1.03101	0.157	0.497	3.19656e-136	FetalLeydig-like	SOX3-E
2.32649e-139	1.14148	0.744	0.448	3.22219e-136	granulosa	MEIS1-C
2.48413e-139	-0.960306	0.193	0.494	3.44052e-136	FetalLeydig-like	PBX1-E
4.37305e-139	-0.859301	0.224	0.527	6.05667e-136	Sertoli_WFDC2	IRX3-E
5.36315e-139	-1.00232	0.151	0.538	7.42796e-136	Sertoli_WFDC2	NR2F6-B
7.09288e-139	-0.821623	0.161	0.496	9.82364e-136	sPAX8m	UBP1-E
8.14471e-139	-0.840611	0.153	0.497	1.12804e-135	sPAX8m	ZBTB43-E
8.66215e-139	0.873093	0.763	0.46	1.19971e-135	preGC_IIb	FOXO6-D
1.08574e-138	-1.1948	0.14	0.485	1.50375e-135	Sertoli_WFDC2	MEOX2-E
4.78022e-138	-0.838815	0.204	0.499	6.6206e-135	Sertoli_WFDC2	POU1F1-D
6.01939e-138	-0.712279	0.213	0.505	8.33686e-135	FetalLeydig-like	ZNF266-E
6.04292e-138	-0.994573	0.132	0.52	8.36945e-135	Sertoli	LYAR-E
6.8294e-138	-1.30901	0.089	0.474	9.45872e-135	FetalLeydig-like	ZNF624-E
1.02998e-137	0.905418	0.87	0.523	1.42652e-134	FetalLeydig-like	ZNF268-E
1.97552e-137	0.782951	0.777	0.437	2.73609e-134	preGC_IIb	LHX2-C
2.03066e-137	0.626791	0.818	0.472	2.81247e-134	Sertoli	ELK3-E
2.03585e-137	-1.20422	0.129	0.47	2.81966e-134	Sertoli	ZFPM2-E
2.04979e-137	-1.29479	0.153	0.461	2.83897e-134	sKITLG	HEYL-E
3.27462e-137	1.25203	0.735	0.446	4.53535e-134	granulosa	SOX5-E
5.10341e-137	-0.844571	0.17	0.476	7.06822e-134	FetalLeydig-like	HIVEP1-E
6.88198e-137	-1.0559	0.137	0.486	9.53154e-134	Sertoli	ZNF208-E
7.08358e-137	-0.891428	0.193	0.504	9.81075e-134	sKITLG	USF2-AA
7.52363e-137	-0.845163	0.152	0.501	1.04202e-133	sPAX8m	ZNF292-E
1.50424e-136	0.574506	0.827	0.468	2.08337e-133	Sertoli	IKZF3-E
1.74701e-136	-1.0319	0.152	0.475	2.41961e-133	FetalLeydig-like	ZNF519-E
2.07971e-136	-1.16564	0.148	0.482	2.8804e-133	FetalLeydig-like	ZNF816-E
2.10933e-136	-0.888086	0.174	0.491	2.92142e-133	FetalLeydig-like	HSF2-E
2.71252e-136	1.03823	0.765	0.452	3.75684e-133	preGC_IIb	NFKB1-AA
3.88491e-136	-0.714228	0.174	0.475	5.3806e-133	FetalLeydig-like	ZNF175-D
4.79877e-136	-0.779886	0.201	0.511	6.6463e-133	sPAX8m	LBX2-E
4.82871e-136	0.973167	0.735	0.435	6.68776e-133	Sertoli	MAFB-C
4.97685e-136	-0.922879	0.164	0.513	6.89294e-133	Sertoli	KDM5A-D
6.64451e-136	-1.05272	0.178	0.48	9.20265e-133	FetalLeydig-like	ZNF516-E
6.75885e-136	1.26559	0.798	0.486	9.361e-133	FetalLeydig-like	ELK3-E
7.0124e-136	1.20735	0.809	0.516	9.71217e-133	FetalLeydig-like	ARID5A-E
7.06827e-136	-1.06593	0.152	0.491	9.78955e-133	FetalLeydig-like	NEUROG2-E
8.64498e-136	-0.859687	0.181	0.515	1.19733e-132	Sertoli	PITX1-B
1.78127e-135	0.985531	0.854	0.52	2.46706e-132	FetalLeydig-like	ZNF606-E
2.0611e-135	0.630381	0.84	0.48	2.85462e-132	Sertoli	ZNF366-E
2.58774e-135	-0.688425	0.189	0.496	3.58402e-132	FetalLeydig-like	SFPQ-E
4.29882e-135	-0.71138	0.204	0.496	5.95387e-132	FetalLeydig-like	MYNN-D
4.79166e-135	-1.03605	0.187	0.475	6.63645e-132	FetalLeydig-like	ZNF264-E
4.882e-135	0.560321	0.838	0.513	6.76157e-132	sKITLG	SSRP1-C
4.98787e-135	-0.894302	0.219	0.442	6.90821e-132	sLGR5_female	SOX2-A
5.0228e-135	-1.2512	0.163	0.47	6.95658e-132	Sertoli_WFDC2	ZFHX4-E
5.13935e-135	-0.909272	0.183	0.504	7.11799e-132	sPAX8m	MIXL1-E
6.98924e-135	-0.953613	0.171	0.52	9.68009e-132	Sertoli_WFDC2	ESR1-AA
8.73079e-135	-1.10503	0.159	0.495	1.20921e-131	FetalLeydig-like	ZNF836-E
8.76238e-135	-1.1095	0.159	0.509	1.21359e-131	preGC_IIa	PRDM16-E
1.23045e-134	-0.900367	0.178	0.554	1.70417e-131	Sertoli	MESP1-E
1.31551e-134	1.05119	0.731	0.444	1.82198e-131	granulosa	ZNF175-D
2.14255e-134	0.552991	0.855	0.534	2.96744e-131	preGC_IIc	HOXC11-D
2.21337e-134	-1.2534	0.135	0.478	3.06551e-131	preGC_IIa	FOXC2-E
2.3275e-134	0.588729	0.827	0.476	3.22359e-131	Sertoli	BCL11B-E
2.58911e-134	0.603783	0.831	0.472	3.58592e-131	Sertoli	DMRTC2-E
3.13835e-134	-0.860454	0.153	0.488	4.34662e-131	sPAX8m	ZNF562-E
4.11835e-134	-0.932674	0.209	0.476	5.70392e-131	FetalLeydig-like	NFATC4-E
4.54425e-134	-1.13884	0.128	0.508	6.29379e-131	FetalLeydig-like	ELK4-C
4.91371e-134	-0.919992	0.174	0.479	6.80549e-131	FetalLeydig-like	NFXL1-E
7.31033e-134	-1.20332	0.13	0.47	1.01248e-130	FetalLeydig-like	ZNF616-E
8.10789e-134	-1.10301	0.165	0.484	1.12294e-130	FetalLeydig-like	ZNF254-E
9.27827e-134	-0.867424	0.209	0.502	1.28504e-130	FetalLeydig-like	POGZ-E
1.65827e-133	0.608658	0.815	0.501	2.2967e-130	Sertoli	ZNF438-E
1.80304e-133	-1.01692	0.198	0.485	2.49721e-130	FetalLeydig-like	EBF4-E
2.30741e-133	-1.00441	0.141	0.497	3.19577e-130	FetalLeydig-like	BCL3-C
3.17061e-133	-1.02144	0.185	0.482	4.3913e-130	FetalLeydig-like	ZNF708-E
5.63869e-133	-1.04004	0.17	0.501	7.80958e-130	FetalLeydig-like	GSX1-E
6.65647e-133	0.545491	0.826	0.514	9.21922e-130	ovarianSurf	FOXL2-B
6.69684e-133	-0.621866	0.2	0.484	9.27512e-130	FetalLeydig-like	ZNF26-E
6.99476e-133	0.857978	0.773	0.485	9.68774e-130	granulosa	ZNF366-E
7.83207e-133	-1.00285	0.142	0.499	1.08474e-129	Sertoli	ZNF239-E
1.02791e-132	-1.10921	0.128	0.491	1.42366e-129	FetalLeydig-like	ZNF627-E
1.21316e-132	-0.920881	0.176	0.491	1.68022e-129	FetalLeydig-like	ZNF761-E
1.47935e-132	-0.708246	0.164	0.487	2.04889e-129	sPAX8m	PRDM15-E
1.49256e-132	-0.890885	0.161	0.482	2.06719e-129	FetalLeydig-like	EGR3-E
1.57083e-132	-0.851835	0.157	0.493	2.1756e-129	sPAX8m	ZNF280C-E
1.76004e-132	-0.898478	0.183	0.517	2.43766e-129	sPAX8m	LHX9-E
1.79181e-132	-0.780798	0.187	0.508	2.48166e-129	FetalLeydig-like	ELF2-E
1.9603e-132	-1.08254	0.178	0.473	2.71502e-129	FetalLeydig-like	ZNF699-E
2.17066e-132	-0.989595	0.154	0.495	3.00637e-129	FetalLeydig-like	GSX2-E
2.22736e-132	-1.01542	0.157	0.52	3.08489e-129	Sertoli	NFKBIE-E
2.9589e-132	0.896574	0.76	0.47	4.09808e-129	granulosa	LHX3-E
3.06665e-132	-0.746834	0.17	0.49	4.24731e-129	sPAX8m	TSC22D2-E
5.73646e-132	-0.551728	0.239	0.53	7.945e-129	Sertoli_WFDC2	ATF2-AA
6.42878e-132	-0.799569	0.202	0.551	8.90386e-129	coelEpi	AHRR-E
8.12127e-132	-1.14378	0.15	0.49	1.1248e-128	FetalLeydig-like	ISL2-E
8.129e-132	-1.13172	0.135	0.483	1.12587e-128	FetalLeydig-like	ZBTB7C-E
9.40119e-132	-0.960321	0.154	0.493	1.30206e-128	FetalLeydig-like	LBX1-E
1.05808e-131	1.12392	0.826	0.508	1.46544e-128	FetalLeydig-like	ZNF281-E
1.19538e-131	-0.812325	0.152	0.481	1.6556e-128	FetalLeydig-like	PROX2-E
1.83655e-131	-0.803391	0.173	0.496	2.54363e-128	sPAX8m	ZNF320-E
2.06637e-131	0.720313	0.789	0.484	2.86193e-128	ovarianSurf	MYC-AA
2.64011e-131	0.619992	0.828	0.478	3.65655e-128	sKITLG	PSPC1-E
3.15828e-131	-1.06152	0.172	0.48	4.37421e-128	FetalLeydig-like	ZNF587-E
4.16298e-131	-0.853758	0.17	0.52	5.76573e-128	Sertoli	TCFL5-E
5.67533e-131	0.620694	0.81	0.449	7.86033e-128	Sertoli	YBX2-E
7.29252e-131	0.809084	0.761	0.46	1.01001e-127	Sertoli_WFDC2	KDM5D-E
7.40221e-131	-0.963711	0.15	0.49	1.02521e-127	FetalLeydig-like	ONECUT3-E
1.02856e-130	-0.783262	0.167	0.507	1.42456e-127	Sertoli	SP100-E
1.37706e-130	1.1384	0.815	0.496	1.90723e-127	FetalLeydig-like	SMARCA5-E
1.41503e-130	-1.12572	0.154	0.461	1.95981e-127	FetalLeydig-like	ZNF236-E
1.46885e-130	-0.913195	0.182	0.512	2.03436e-127	sPAX8m	EN1-E
1.87643e-130	-1.14711	0.135	0.476	2.59885e-127	FetalLeydig-like	ZNF214-E
2.28359e-130	-0.725591	0.17	0.483	3.16278e-127	FetalLeydig-like	ZNF251-E
2.79138e-130	-1.17265	0.157	0.473	3.86606e-127	FetalLeydig-like	ZNF827-E
2.92905e-130	0.81917	0.786	0.472	4.05673e-127	sPAX8m	TFCP2-D
3.02987e-130	0.949641	0.867	0.513	4.19638e-127	FetalLeydig-like	ZBTB7A-C
5.05288e-130	0.738556	0.784	0.479	6.99824e-127	coelEpi	EGR2-D
5.20351e-130	0.57408	0.847	0.496	7.20686e-127	sKITLG	ZNF22-E
5.49617e-130	0.556315	0.843	0.581	7.6122e-127	Sertoli_WFDC2	REST-A
5.89293e-130	-0.893998	0.163	0.528	8.16171e-127	Sertoli	NFKBIB-E
6.87301e-130	-0.734676	0.198	0.514	9.51911e-127	FetalLeydig-like	ZBTB2-E
7.8987e-130	-0.905343	0.18	0.487	1.09397e-126	FetalLeydig-like	TCF12-C
1.7544e-129	-0.955471	0.19	0.487	2.42984e-126	Sertoli_WFDC2	PITX2-D
1.8759e-129	0.541773	0.84	0.519	2.59812e-126	Sertoli	ZNF174-E
2.52015e-129	-0.785859	0.165	0.496	3.4904e-126	sPAX8m	MGA-E
2.86176e-129	-1.09637	0.172	0.491	3.96353e-126	FetalLeydig-like	DUXA-E
3.72541e-129	0.766021	0.785	0.455	5.15969e-126	sPAX8e	DLX5-E
7.48946e-129	-0.770947	0.278	0.533	1.03729e-125	Sertoli_WFDC2	SP140-E
9.32994e-129	-1.15048	0.143	0.465	1.2922e-125	FetalLeydig-like	SP110-E
1.47218e-128	-0.804386	0.211	0.546	2.03897e-125	sKITLG	IRX5-E
1.57079e-128	1.05405	0.727	0.442	2.17555e-125	granulosa	MAFK-C
2.2568e-128	-0.736881	0.177	0.5	3.12567e-125	sPAX8m	ZBTB5-E
2.51304e-128	-0.966601	0.184	0.503	3.48056e-125	Sertoli	ZNF362-E
2.92961e-128	-0.769602	0.157	0.485	4.05751e-125	FetalLeydig-like	ZNF605-E
3.95359e-128	0.657376	0.696	0.336	5.47573e-125	Sertoli_WFDC2	MZF1-D
5.01134e-128	0.722675	0.783	0.45	6.94071e-125	sPAX8e	POU2F1-A
5.16072e-128	-1.10464	0.143	0.485	7.1476e-125	FetalLeydig-like	ZNF782-E
5.91176e-128	-0.847741	0.163	0.5	8.18778e-125	sPAX8m	ZNF131-E
6.02244e-128	-1.02343	0.179	0.507	8.34109e-125	preGC_IIb	PRDM16-E
6.94469e-128	0.575298	0.838	0.497	9.6184e-125	sPAX8m	ZNF431-E
7.17846e-128	-0.798697	0.204	0.494	9.94217e-125	FetalLeydig-like	ZNF410-E
1.19141e-127	-1.29117	0.125	0.482	1.6501e-124	Sertoli	HAND2-E
1.22993e-127	-0.816539	0.163	0.5	1.70346e-124	sPAX8m	ZNF621-E
1.35931e-127	-1.14426	0.17	0.465	1.88264e-124	FetalLeydig-like	ZNF611-E
1.42753e-127	-1.01413	0.165	0.48	1.97712e-124	FetalLeydig-like	ZNF567-E
2.04656e-127	-1.09426	0.13	0.475	2.83449e-124	FetalLeydig-like	ZNF845-E
2.08608e-127	0.708146	0.781	0.431	2.88922e-124	sKITLG	ZNF35-E
3.22767e-127	1.13045	0.817	0.491	4.47033e-124	FetalLeydig-like	ZNF649-E
3.31015e-127	-0.902944	0.173	0.488	4.58456e-124	Sertoli	PLAGL1-E
3.36797e-127	0.807296	0.767	0.458	4.66464e-124	Sertoli_WFDC2	ZFY-E
4.40777e-127	-1.14128	0.139	0.475	6.10476e-124	FetalLeydig-like	ZNF829-E
4.72791e-127	-0.85731	0.187	0.511	6.54816e-124	sPAX8m	NOTO-E
4.91431e-127	-0.694361	0.209	0.493	6.80632e-124	FetalLeydig-like	ZNF558-E
7.03137e-127	-0.772931	0.168	0.51	9.73844e-124	sPAX8m	ZNF655-E
8.21816e-127	-0.92845	0.196	0.48	1.13822e-123	FetalLeydig-like	PRDM10-E
1.07074e-126	-0.843993	0.178	0.501	1.48298e-123	sPAX8m	ADNP2-E
1.32029e-126	-0.997286	0.193	0.485	1.8286e-123	FetalLeydig-like	ZNF471-E
1.55292e-126	-0.994982	0.161	0.48	2.1508e-123	FetalLeydig-like	ZNF441-E
2.01541e-126	-0.924435	0.174	0.502	2.79134e-123	FetalLeydig-like	ZNF577-E
2.06227e-126	0.636199	0.809	0.476	2.85624e-123	granulosa	SOX7-E
2.15944e-126	-0.933296	0.187	0.47	2.99082e-123	FetalLeydig-like	ZSCAN29-E
2.38744e-126	-1.14064	0.141	0.458	3.3066e-123	preGC_I	GATA6-B
3.76729e-126	-1.02762	0.178	0.491	5.2177e-123	FetalLeydig-like	HOXA13-E
4.8992e-126	0.559184	0.827	0.502	6.7854e-123	sKITLG	PHF5A-E
5.92721e-126	1.21941	0.718	0.458	8.20919e-123	granulosa	DMRT3-E
9.47117e-126	-0.884142	0.157	0.493	1.31176e-122	FetalLeydig-like	HOXD11-E
1.17078e-125	-0.642094	0.17	0.489	1.62153e-122	FetalLeydig-like	ADNP2-E
1.19976e-125	-1.0986	0.157	0.475	1.66167e-122	FetalLeydig-like	ZNF566-E
1.20376e-125	-0.909996	0.159	0.475	1.66721e-122	sPAX8m	ZBED4-E
1.20436e-125	-0.791417	0.193	0.517	1.66804e-122	FetalLeydig-like	SMARCE1-E
1.65519e-125	-1.07115	0.143	0.471	2.29243e-122	FetalLeydig-like	PPP1R13L-E
2.33107e-125	0.66841	0.805	0.461	3.22853e-122	sKITLG	SFPQ-E
3.30126e-125	-0.819958	0.164	0.505	4.57225e-122	sPAX8m	ZNF654-E
4.0685e-125	-0.849126	0.167	0.507	5.63487e-122	Sertoli	ZNF561-E
5.04832e-125	-1.13149	0.152	0.477	6.99192e-122	FetalLeydig-like	ZNF461-E
5.67584e-125	-0.846227	0.202	0.498	7.86104e-122	FetalLeydig-like	HLF-E
7.60623e-125	-1.3998	0.16	0.474	1.05346e-121	preGC_IIa	MEIS3-E
8.4022e-125	-0.775211	0.169	0.495	1.1637e-121	sPAX8m	PRDM10-E
8.57323e-125	-0.750035	0.234	0.548	1.18739e-121	ovarianSurf	ETV7-E
1.14043e-124	-0.807239	0.191	0.504	1.57949e-121	Sertoli	ZNF781-E
1.18382e-124	-0.822196	0.183	0.482	1.63959e-121	FetalLeydig-like	UBP1-E
2.08273e-124	0.828016	0.74	0.398	2.88458e-121	ovarianSurf	KLF10-D
2.12264e-124	-0.837611	0.17	0.498	2.93985e-121	sPAX8m	ZNF283-E
2.22261e-124	-1.01332	0.148	0.496	3.07832e-121	FetalLeydig-like	DLX6-E
3.27467e-124	-0.792751	0.19	0.491	4.53542e-121	sPAX8m	ALX1-E
3.65282e-124	-0.706163	0.165	0.499	5.05915e-121	sPAX8m	PURB-E
4.65786e-124	-1.36055	0.128	0.458	6.45114e-121	FetalLeydig-like	ZNF423-E
8.86281e-124	-0.355138	0.178	0.47	1.2275e-120	FetalLeydig-like	KLF7-E
9.13167e-124	-0.811016	0.211	0.491	1.26474e-120	FetalLeydig-like	TFDP2-E
1.10036e-123	-0.844007	0.165	0.506	1.524e-120	FetalLeydig-like	DLX2-E
1.24875e-123	-1.03848	0.148	0.484	1.72951e-120	FetalLeydig-like	ZNF184-E
1.35586e-123	0.611075	0.79	0.432	1.87787e-120	granulosa	PRRX1-E
1.39404e-123	-1.08214	0.115	0.479	1.93075e-120	FetalLeydig-like	ZNF570-E
2.81692e-123	-0.618104	0.185	0.488	3.90143e-120	sPAX8m	CSRNP2-E
3.7153e-123	0.714319	0.779	0.476	5.14569e-120	preGC_IIb	SMAD3-AA
4.24215e-123	-0.966919	0.196	0.478	5.87538e-120	FetalLeydig-like	ZFP28-E
6.05281e-123	-0.962453	0.154	0.486	8.38315e-120	FetalLeydig-like	DLX3-E
6.22058e-123	0.790491	0.793	0.452	8.6155e-120	preGC_IIb	ZNF460-E
6.36211e-123	-0.551815	0.222	0.497	8.81152e-120	FetalLeydig-like	ZNF343-E
6.61561e-123	0.525469	0.825	0.426	9.16262e-120	granulosa	TSHZ3-E
1.18923e-122	-0.867614	0.189	0.514	1.64709e-119	sPAX8m	BSX-E
1.18923e-122	-0.867614	0.189	0.514	1.64709e-119	sPAX8m	RAX2-E
1.50728e-122	-0.81569	0.209	0.473	2.08758e-119	FetalLeydig-like	KDM2A-E
1.58952e-122	-0.94369	0.211	0.485	2.20148e-119	sKITLG	SMARCC1-D
1.71966e-122	-1.02578	0.185	0.474	2.38173e-119	FetalLeydig-like	ZNF41-E
1.74396e-122	-0.920931	0.206	0.503	2.41538e-119	sKITLG	RUNX1-AA
2.18314e-122	-0.837873	0.162	0.484	3.02366e-119	sPAX8m	PHTF1-E
2.32047e-122	-0.956679	0.174	0.48	3.21385e-119	FetalLeydig-like	ZNF805-E
2.83044e-122	-1.0604	0.167	0.46	3.92015e-119	FetalLeydig-like	FOXN2-E
4.54933e-122	1.02635	0.735	0.448	6.30082e-119	coelEpi	NPAS4-E
5.03518e-122	-0.769133	0.211	0.496	6.97373e-119	FetalLeydig-like	ZNF496-E
5.28295e-122	-0.841215	0.169	0.483	7.31689e-119	sPAX8m	ZNF778-E
6.11246e-122	-0.819485	0.16	0.499	8.46576e-119	sPAX8m	ZNF484-E
7.09667e-122	0.741814	0.736	0.435	9.82889e-119	Sertoli_WFDC2	ZNF8-E
7.80896e-122	-0.813673	0.172	0.516	1.08154e-118	sPAX8m	ZNF354B-E
9.21781e-122	-0.842811	0.209	0.51	1.27667e-118	coelEpi	THRB-D
9.23278e-122	0.949253	0.863	0.508	1.27874e-118	FetalLeydig-like	NKX6-2-E
9.89719e-122	1.07212	0.74	0.455	1.37076e-118	granulosa	PEG3-E
1.28319e-121	1.05419	0.712	0.454	1.77722e-118	coelEpi	HEY2-E
1.58667e-121	-0.847317	0.177	0.536	2.19754e-118	Sertoli	ETV2-E
1.74822e-121	0.574988	0.784	0.425	2.42128e-118	sPAX8m	FOXA2-B
2.26883e-121	-1.16467	0.113	0.485	3.14233e-118	FetalLeydig-like	ZNF501-E
2.39438e-121	-0.873662	0.183	0.532	3.31621e-118	Sertoli	ZNF579-E
2.50246e-121	-0.782295	0.154	0.485	3.46591e-118	sPAX8m	ZNF445-E
2.57288e-121	-0.797416	0.18	0.503	3.56344e-118	sPAX8m	ZNF700-E
2.89153e-121	-0.837861	0.191	0.508	4.00477e-118	FetalLeydig-like	NFAT5-E
3.00668e-121	-1.07484	0.133	0.467	4.16425e-118	FetalLeydig-like	ZNF793-E
3.37231e-121	-0.893557	0.176	0.498	4.67065e-118	Sertoli	SALL2-E
4.28858e-121	-0.893137	0.179	0.522	5.93969e-118	Sertoli	HMG20B-E
4.72385e-121	-0.862455	0.196	0.515	6.54253e-118	sPAX8m	SHOX-E
4.78371e-121	0.480942	0.832	0.53	6.62544e-118	preGC_IIa	ZNF581-E
5.37392e-121	1.00324	0.738	0.473	7.44288e-118	granulosa	SPIB-C
6.55669e-121	-0.71457	0.192	0.5	9.08102e-118	sPAX8m	HOXD3-E
7.43988e-121	-1.14959	0.109	0.486	1.03042e-117	FetalLeydig-like	GRHL1-E
8.59388e-121	-0.613957	0.273	0.545	1.19025e-117	Sertoli_WFDC2	RERE-E
9.93047e-121	-0.860526	0.178	0.496	1.37537e-117	FetalLeydig-like	ZBTB20-E
1.16447e-120	0.649328	0.809	0.478	1.6128e-117	Sertoli	SOX30-E
1.33516e-120	-1.09547	0.124	0.482	1.8492e-117	FetalLeydig-like	ZNF559-E
1.429e-120	-1.02103	0.15	0.495	1.97916e-117	FetalLeydig-like	TFAP2B-E
1.50165e-120	-0.919853	0.188	0.491	2.07978e-117	sPAX8m	SIX4-E
1.60545e-120	-0.987644	0.157	0.505	2.22354e-117	Sertoli_WFDC2	GLI2-A
1.67403e-120	0.959677	0.746	0.417	2.31853e-117	Sertoli	NFATC2-B
2.11009e-120	0.670493	0.72	0.367	2.92248e-117	sPAX8m	RARA-AA
2.7622e-120	-0.871928	0.207	0.497	3.82565e-117	FetalLeydig-like	HOXA5-E
3.56303e-120	0.536578	0.828	0.462	4.9348e-117	sPAX8m	SIM1-E
3.67514e-120	-1.06041	0.152	0.49	5.09007e-117	FetalLeydig-like	POU6F2-E
3.94334e-120	-1.07391	0.137	0.474	5.46152e-117	FetalLeydig-like	ZNF138-E
5.13289e-120	0.550241	0.825	0.507	7.10905e-117	sPAX8m	ZNF397-E
5.16441e-120	-0.69202	0.262	0.558	7.1527e-117	granulosa	ZHX3-E
5.33772e-120	-0.846907	0.168	0.481	7.39275e-117	sPAX8m	ZNF398-E
5.70515e-120	-1.06823	0.158	0.485	7.90164e-117	sKITLG	ARNT2-E
6.36384e-120	-0.574939	0.193	0.489	8.81392e-117	FetalLeydig-like	ZNF700-E
8.23062e-120	0.744198	0.78	0.447	1.13994e-116	preGC_IIb	ELMSAN1-E
1.33371e-119	-1.12832	0.117	0.471	1.84719e-116	FetalLeydig-like	MEOX2-E
1.45021e-119	-1.13864	0.164	0.49	2.00854e-116	sKITLG	BNC1-E
2.39508e-119	0.729344	0.725	0.443	3.31719e-116	preGC_IIb	VDR-AA
3.40751e-119	-0.832531	0.173	0.494	4.7194e-116	sPAX8m	ZNF891-E
3.67639e-119	-0.656525	0.193	0.51	5.09179e-116	FetalLeydig-like	YY2-E
4.37438e-119	-0.673723	0.172	0.506	6.05852e-116	sPAX8m	FOXJ3-E
4.75265e-119	0.632844	0.785	0.448	6.58242e-116	sKITLG	ZNF239-E
4.97942e-119	-0.894099	0.176	0.495	6.8965e-116	Sertoli	ZFP64-E
6.31931e-119	-0.902081	0.193	0.494	8.75224e-116	FetalLeydig-like	HOXB2-E
6.37062e-119	-0.985517	0.13	0.512	8.82331e-116	FetalLeydig-like	E2F7-C
7.55867e-119	1.05548	0.804	0.507	1.04688e-115	FetalLeydig-like	MYT1-E
7.6189e-119	-0.860926	0.178	0.5	1.05522e-115	sPAX8m	ZNF460-E
8.2226e-119	-0.743308	0.172	0.461	1.13883e-115	FetalLeydig-like	MEIS3-E
1.91626e-118	0.527671	0.816	0.524	2.65402e-115	preGC_IIb	FOXS1-E
2.10419e-118	0.568711	0.725	0.465	2.91431e-115	Sertoli	GATA4-B
2.19268e-118	-0.921427	0.135	0.503	3.03686e-115	FetalLeydig-like	KDM5B-C
2.27861e-118	0.541383	0.838	0.502	3.15588e-115	sPAX8m	ZNF91-E
5.48785e-118	0.669292	0.789	0.48	7.60068e-115	ovarianSurf	ZNF595-E
5.65139e-118	0.531794	0.817	0.507	7.82717e-115	sKITLG	GTF3A-E
5.99124e-118	0.681172	0.773	0.437	8.29787e-115	sKITLG	ZNF195-E
7.85417e-118	0.556261	0.81	0.48	1.0878e-114	Sertoli	LHX1-E
7.9991e-118	-0.823397	0.208	0.529	1.10788e-114	sPAX8e	ZFPM1-E
9.28553e-118	-0.729778	0.184	0.531	1.28605e-114	Sertoli	SMARCE1-E
1.05128e-117	-0.977423	0.202	0.496	1.45602e-114	Sertoli	EBF4-E
1.37279e-117	0.855051	0.748	0.444	1.90131e-114	sKITLG	TEAD3-D
1.40147e-117	-0.818697	0.182	0.487	1.94103e-114	sPAX8m	ZNF41-E
1.45539e-117	-0.981075	0.167	0.469	2.01571e-114	FetalLeydig-like	ZSCAN25-E
1.91058e-117	-0.868046	0.18	0.484	2.64616e-114	FetalLeydig-like	ZNF354A-E
2.3261e-117	-0.776254	0.237	0.529	3.22164e-114	granulosa	GLI1-B
2.74173e-117	-0.943486	0.161	0.49	3.79729e-114	FetalLeydig-like	ZFP82-E
2.883e-117	-0.991647	0.178	0.487	3.99295e-114	FetalLeydig-like	FOXQ1-E
2.91696e-117	-0.793255	0.213	0.517	4.03999e-114	sPAX8m	DLX2-E
3.10845e-117	0.720302	0.737	0.444	4.3052e-114	ovarianSurf	PITX2-D
3.40421e-117	-0.911504	0.154	0.488	4.71483e-114	FetalLeydig-like	AIRE-E
3.46583e-117	0.962533	0.71	0.455	4.80018e-114	preGC_IIb	CLOCK-B
3.77039e-117	-0.221899	0.172	0.485	5.22199e-114	FetalLeydig-like	NFKBIZ-E
4.51722e-117	0.480113	0.851	0.521	6.25634e-114	preGC_IIa	FOXS1-E
4.7034e-117	0.922687	0.729	0.438	6.5142e-114	granulosa	ASCL1-C
4.76032e-117	-1.00221	0.185	0.495	6.59305e-114	Sertoli	EMX2-E
5.04607e-117	-0.836588	0.193	0.495	6.98881e-114	FetalLeydig-like	NOBOX-E
5.38702e-117	-0.96705	0.185	0.472	7.46102e-114	coelEpi	HIF1A-AA
8.11166e-117	-0.818093	0.204	0.519	1.12346e-113	FetalLeydig-like	CREBL2-E
9.30108e-117	1.08587	0.718	0.448	1.2882e-113	granulosa	HOXB13-C
9.58333e-117	-1.10053	0.187	0.47	1.32729e-113	FetalLeydig-like	ZNF641-E
2.10061e-116	0.943416	0.83	0.513	2.90935e-113	FetalLeydig-like	ZNF438-E
2.4845e-116	-0.859196	0.186	0.522	3.44103e-113	Sertoli	ZNF513-E
3.7761e-116	-0.524086	0.18	0.482	5.22989e-113	sPAX8m	ZBTB40-E
3.89735e-116	-1.20079	0.165	0.473	5.39783e-113	FetalLeydig-like	IKZF2-E
4.75758e-116	-0.881813	0.164	0.489	6.58925e-113	sPAX8m	CSRNP3-E
5.29459e-116	-0.856975	0.167	0.476	7.33301e-113	FetalLeydig-like	PLAGL1-E
5.393e-116	0.724576	0.767	0.457	7.4693e-113	preGC_IIb	AR-AA
8.19298e-116	-0.686369	0.181	0.499	1.13473e-112	sPAX8m	HMG20A-E
8.90372e-116	-0.733924	0.265	0.549	1.23317e-112	preGC_IIb	BHLHE40-C
1.1247e-115	0.687224	0.771	0.479	1.55771e-112	Sertoli_WFDC2	NFE2L2-A
1.14703e-115	0.739501	0.744	0.434	1.58864e-112	Sertoli_WFDC2	MAFB-C
2.06201e-115	-0.88624	0.161	0.487	2.85588e-112	FetalLeydig-like	FOXH1-E
2.2704e-115	-0.766991	0.2	0.496	3.1445e-112	FetalLeydig-like	ZNF449-E
3.24756e-115	-0.73731	0.173	0.512	4.49788e-112	sPAX8m	ZNF451-E
3.51099e-115	-0.795989	0.209	0.498	4.86271e-112	Sertoli	CREM-B
7.57542e-115	0.922815	0.725	0.446	1.0492e-111	granulosa	MEIS2-C
7.58584e-115	0.797187	0.753	0.463	1.05064e-111	granulosa	TBR1-E
8.19683e-115	-0.946395	0.146	0.481	1.13526e-111	FetalLeydig-like	MEIS1-C
8.51713e-115	-0.694236	0.166	0.486	1.17962e-111	sPAX8m	RFX7-E
8.98089e-115	0.543272	0.812	0.527	1.24385e-111	preGC_IIb	TBX18-E
1.19948e-114	-1.40086	0.148	0.456	1.66128e-111	Sertoli	BNC2-E
1.20713e-114	-0.819927	0.162	0.499	1.67188e-111	sPAX8m	ZNF26-E
1.21167e-114	-1.0808	0.138	0.489	1.67816e-111	Sertoli	TFAP2C-A
1.24261e-114	1.14226	0.681	0.451	1.72101e-111	coelEpi	ATOH8-E
1.37474e-114	-1.31109	0.14	0.48	1.90401e-111	preGC_IIa	TSHZ3-E
1.41396e-114	-0.883528	0.152	0.488	1.95833e-111	FetalLeydig-like	NHLH1-E
1.54505e-114	-1.00035	0.167	0.499	2.13989e-111	FetalLeydig-like	SHOX2-E
2.14567e-114	0.638697	0.796	0.54	2.97175e-111	sPAX8m	PAX8-A
2.40418e-114	-0.683748	0.18	0.516	3.32978e-111	sPAX8m	POGZ-E
2.46019e-114	-0.78661	0.196	0.499	3.40737e-111	FetalLeydig-like	RHOXF1-E
2.51155e-114	0.438202	0.857	0.528	3.47849e-111	sKITLG	ZNF581-E
2.85466e-114	-0.859264	0.202	0.507	3.95371e-111	Sertoli	FOXO3-AA
2.97099e-114	0.851785	0.732	0.453	4.11482e-111	granulosa	POU4F2-C
3.53513e-114	-0.758211	0.178	0.518	4.89615e-111	sPAX8m	CREBZF-E
3.61514e-114	0.627964	0.741	0.435	5.00697e-111	Sertoli_WFDC2	ZFHX3-E
4.20604e-114	-0.654543	0.185	0.479	5.82537e-111	FetalLeydig-like	ZNF317-E
4.99925e-114	-1.07124	0.152	0.471	6.92396e-111	FetalLeydig-like	ZNF573-E
6.16378e-114	0.528637	0.816	0.469	8.53683e-111	Sertoli	DMRT1-E
6.26036e-114	-0.465684	0.193	0.486	8.67059e-111	sPAX8m	ZFP92-E
6.7692e-114	0.612736	0.734	0.439	9.37535e-111	Sertoli_WFDC2	ZBTB47-E
8.26616e-114	-0.987906	0.173	0.493	1.14486e-110	Sertoli	ZNF487-E
1.05555e-113	-0.75053	0.262	0.542	1.46193e-110	preGC_IIb	GZF1-E
1.0924e-113	-1.18388	0.141	0.475	1.51298e-110	FetalLeydig-like	ZNF737-E
1.53089e-113	-1.26847	0.133	0.468	2.12028e-110	FetalLeydig-like	ZNF675-E
1.80095e-113	0.550528	0.809	0.486	2.49431e-110	Sertoli	HSF5-E
1.8208e-113	-0.714886	0.198	0.486	2.52181e-110	FetalLeydig-like	ZNF460-E
1.95604e-113	-0.796114	0.171	0.501	2.70911e-110	sPAX8m	RBAK-E
2.59914e-113	1.14557	0.796	0.499	3.59981e-110	FetalLeydig-like	HES4-E
3.08423e-113	-0.947323	0.2	0.481	4.27166e-110	coelEpi	PGR-A
3.36019e-113	0.653431	0.748	0.447	4.65387e-110	Sertoli_WFDC2	CASZ1-E
3.54524e-113	-0.610229	0.242	0.501	4.91015e-110	Sertoli_WFDC2	FOSB-D
3.7668e-113	0.391061	0.896	0.517	5.21702e-110	Sertoli	FOXS1-E
3.9133e-113	-0.583363	0.18	0.483	5.41992e-110	FetalLeydig-like	ZNF789-E
4.58668e-113	0.551506	0.808	0.496	6.35255e-110	sPAX8m	ZNF281-E
6.44411e-113	-1.08099	0.138	0.476	8.92509e-110	Sertoli	HIF1A-AA
7.18427e-113	-0.773659	0.181	0.507	9.95021e-110	sPAX8m	ZNF791-E
7.70127e-113	-0.981154	0.196	0.467	1.06663e-109	FetalLeydig-like	ZNF81-E
8.7088e-113	0.925705	0.73	0.455	1.20617e-109	granulosa	ZNF589-D
9.61901e-113	-0.866854	0.179	0.51	1.33223e-109	sPAX8m	SFPQ-E
1.20175e-112	0.718999	0.785	0.477	1.66442e-109	preGC_IIb	HMGA1-B
1.3439e-112	0.772192	0.737	0.442	1.8613e-109	Sertoli_WFDC2	NFE2-C
1.38977e-112	-0.710898	0.242	0.568	1.92483e-109	sKITLG	ZNF202-E
1.53163e-112	0.571116	0.792	0.484	2.12131e-109	granulosa	IRF6-E
2.02583e-112	-0.943547	0.187	0.498	2.80578e-109	coelEpi	YBX2-E
2.19271e-112	1.00878	0.734	0.453	3.0369e-109	granulosa	ONECUT1-C
2.43449e-112	0.930847	0.734	0.45	3.37177e-109	granulosa	ZNF618-E
2.61362e-112	-1.17085	0.166	0.472	3.61986e-109	Sertoli	BATF2-E
2.69999e-112	-0.838355	0.193	0.529	3.73949e-109	Sertoli	ZNF771-E
3.60012e-112	-0.902542	0.183	0.483	4.98617e-109	FetalLeydig-like	HOXC9-E
4.29552e-112	0.587561	0.783	0.526	5.9493e-109	Sertoli_WFDC2	FOXS1-E
4.97683e-112	1.19392	0.703	0.442	6.89291e-109	granulosa	NFIB-E
6.83536e-112	0.550036	0.782	0.478	9.46698e-109	ovarianSurf	FLI1-A
7.03722e-112	-1.07723	0.139	0.496	9.74656e-109	FetalLeydig-like	BARHL2-E
8.58442e-112	-0.921263	0.167	0.483	1.18894e-108	FetalLeydig-like	ONECUT2-E
8.84401e-112	-0.720525	0.175	0.506	1.22489e-108	sPAX8m	ARID4B-E
9.70972e-112	0.874369	0.675	0.484	1.3448e-108	Sertoli_WFDC2	NFAT5-E
1.54468e-111	-0.778015	0.241	0.5	2.13938e-108	granulosa	RUNX2-A
1.79863e-111	-0.967125	0.187	0.511	2.4911e-108	sKITLG	FOSL1-B
1.80491e-111	0.635364	0.754	0.46	2.4998e-108	coelEpi	RUNX2-A
2.11625e-111	-0.821977	0.165	0.443	2.931e-108	FetalLeydig-like	BNC2-E
2.23571e-111	-0.760204	0.198	0.506	3.09645e-108	FetalLeydig-like	TAF1-C
2.254e-111	-0.540337	0.191	0.49	3.12179e-108	FetalLeydig-like	ZNF800-E
2.41807e-111	0.816584	0.746	0.468	3.34903e-108	coelEpi	VENTX-E
2.92236e-111	-0.730525	0.202	0.481	4.04747e-108	FetalLeydig-like	ZBTB43-E
3.17796e-111	-0.247526	0.183	0.491	4.40148e-108	FetalLeydig-like	ZNF267-E
3.35898e-111	0.557986	0.78	0.426	4.65218e-108	preGC_IIa	HIF1A-AA
4.01458e-111	-0.841194	0.233	0.518	5.5602e-108	Sertoli_WFDC2	IRX2-E
6.12457e-111	-0.52669	0.207	0.5	8.48253e-108	FetalLeydig-like	ZFP91-E
8.12915e-111	-0.334163	0.202	0.481	1.12589e-107	FetalLeydig-like	ZBTB21-E
8.59978e-111	-0.75393	0.204	0.495	1.19107e-107	FetalLeydig-like	ZNF384-C
9.48083e-111	-0.957665	0.183	0.488	1.3131e-107	FetalLeydig-like	HOXD3-E
1.16755e-110	-0.754211	0.173	0.514	1.61706e-107	sPAX8m	ZNF529-E
1.1956e-110	0.676632	0.816	0.511	1.65591e-107	preGC_I	KLF2-B
1.24738e-110	-0.814123	0.178	0.492	1.72762e-107	sPAX8m	NFXL1-E
1.38111e-110	1.12397	0.785	0.488	1.91284e-107	FetalLeydig-like	DMRTB1-E
1.61481e-110	1.23201	0.678	0.451	2.23652e-107	coelEpi	NFATC4-E
1.941e-110	-0.816649	0.189	0.519	2.68829e-107	Sertoli	KAT5-E
2.41044e-110	-1.11355	0.13	0.473	3.33846e-107	FetalLeydig-like	ZNF181-E
2.52018e-110	-0.884316	0.201	0.503	3.49044e-107	Sertoli	ZNF775-E
2.81523e-110	1.28678	0.695	0.451	3.89909e-107	coelEpi	HOXC8-E
3.07843e-110	-0.837682	0.195	0.53	4.26362e-107	Sertoli	ZFPM1-E
3.13182e-110	-0.776744	0.217	0.504	4.33757e-107	sPAX8m	RAX-E
4.10446e-110	-0.467106	0.215	0.5	5.68468e-107	FetalLeydig-like	ZNF76-E
4.15242e-110	-0.544143	0.228	0.5	5.75111e-107	FetalLeydig-like	TFEB-E
4.87649e-110	-0.772221	0.227	0.54	6.75394e-107	sKITLG	TOX3-E
6.00649e-110	-0.831267	0.211	0.434	8.31898e-107	sLGR5_female	FOXC1-D
6.37785e-110	0.810974	0.705	0.486	8.83332e-107	Sertoli_WFDC2	SMARCA1-E
8.23512e-110	0.94499	0.713	0.466	1.14056e-106	preGC_IIb	CREB1-AA
1.04448e-109	-0.948465	0.157	0.496	1.4466e-106	FetalLeydig-like	FOXI1-E
1.09188e-109	-0.685145	0.19	0.512	1.51226e-106	sPAX8m	ZNF333-E
1.19555e-109	-0.728097	0.157	0.479	1.65584e-106	FetalLeydig-like	ZNF211-E
1.21238e-109	0.681424	0.779	0.478	1.67914e-106	preGC_IIb	SOX7-E
1.29004e-109	-0.751011	0.207	0.489	1.78671e-106	FetalLeydig-like	ZNF275-E
1.50988e-109	-0.482443	0.215	0.489	2.09118e-106	FetalLeydig-like	HIVEP2-E
1.54613e-109	0.713529	0.751	0.436	2.14139e-106	granulosa	NR1H2-B
1.60126e-109	0.950397	0.804	0.518	2.21775e-106	FetalLeydig-like	FOXP4-E
1.80277e-109	-0.786225	0.215	0.512	2.49684e-106	sPAX8m	GSX1-E
2.14353e-109	-1.19995	0.178	0.465	2.96879e-106	Sertoli_WFDC2	TCF21-E
2.37193e-109	-0.819844	0.161	0.48	3.28513e-106	FetalLeydig-like	CASZ1-E
2.48642e-109	-1.06485	0.167	0.48	3.44369e-106	FetalLeydig-like	ZNF462-E
2.82953e-109	0.851449	0.755	0.449	3.91889e-106	granulosa	ADNP-D
4.16759e-109	0.612363	0.77	0.456	5.77212e-106	Sertoli	RXRB-D
4.37338e-109	0.562493	0.803	0.482	6.05714e-106	sKITLG	TBPL1-E
5.3802e-109	-0.776162	0.196	0.486	7.45158e-106	sPAX8m	PHOX2A-E
6.19945e-109	0.708862	0.744	0.433	8.58624e-106	granulosa	NR1H3-B
8.96539e-109	-0.57177	0.291	0.531	1.24171e-105	Sertoli_WFDC2	FOXN1-E
9.02134e-109	-0.920775	0.182	0.524	1.24946e-105	coelEpi	HMGA1-B
9.29193e-109	-0.972515	0.176	0.488	1.28693e-105	FetalLeydig-like	ZNF418-E
9.4782e-109	-0.773547	0.228	0.55	1.31273e-105	sPAX8e	MESP1-E
1.00853e-108	0.529181	0.8	0.474	1.39681e-105	Sertoli	DMRTB1-E
1.0863e-108	-0.847228	0.181	0.485	1.50452e-105	sPAX8m	IKZF2-E
1.24213e-108	1.09169	0.709	0.446	1.72035e-105	coelEpi	PLAGL1-E
1.26791e-108	0.951832	0.717	0.471	1.75605e-105	granulosa	SOX21-E
1.35084e-108	0.451963	0.841	0.525	1.87092e-105	preGC_IIa	TBX18-E
1.39529e-108	-0.750309	0.249	0.514	1.93247e-105	sKITLG	OVOL1-E
1.55162e-108	-0.890987	0.18	0.491	2.149e-105	FetalLeydig-like	ATF7-C
1.90389e-108	-1.3423	0.087	0.46	2.63689e-105	FetalLeydig-like	MYRF-E
2.14384e-108	-1.16889	0.13	0.474	2.96921e-105	FetalLeydig-like	ZNF701-E
2.25995e-108	-0.870709	0.172	0.479	3.13003e-105	FetalLeydig-like	EVX2-E
2.28708e-108	-0.922415	0.192	0.474	3.16761e-105	sPAX8m	ZNF749-E
2.31386e-108	-0.717591	0.161	0.474	3.20469e-105	sPAX8m	ZNF236-E
2.45233e-108	-1.51146	0.184	0.468	3.39648e-105	preGC_IIa	ZNF423-E
2.48068e-108	-0.757528	0.2	0.499	3.43574e-105	FetalLeydig-like	ZNF664-E
2.495e-108	1.11707	0.77	0.496	3.45558e-105	FetalLeydig-like	FEZF2-E
2.76369e-108	-0.738023	0.187	0.493	3.82772e-105	sPAX8m	ZNF516-E
3.20563e-108	-0.713566	0.179	0.509	4.4398e-105	sPAX8m	HMGXB4-E
3.47325e-108	0.502559	0.808	0.516	4.81046e-105	sPAX8m	MXD1-E
3.51631e-108	0.700732	0.755	0.442	4.87009e-105	Sertoli	SMARCC1-D
3.8666e-108	0.706295	0.751	0.47	5.35524e-105	preGC_IIb	ETS1-AA
4.09133e-108	-0.910566	0.176	0.496	5.66649e-105	Sertoli	ZSCAN5A-E
4.09993e-108	-0.588305	0.22	0.51	5.6784e-105	FetalLeydig-like	CDC5L-E
4.74899e-108	-0.75105	0.234	0.553	6.57735e-105	Sertoli_WFDC2	OSR1-B
6.13745e-108	0.90685	0.846	0.504	8.50036e-105	FetalLeydig-like	DLX4-E
6.17196e-108	-0.694617	0.256	0.543	8.54817e-105	Sertoli_WFDC2	IRX5-E
6.21582e-108	-0.758849	0.192	0.5	8.60891e-105	sPAX8m	NFX1-E
6.6078e-108	-0.787096	0.209	0.504	9.1518e-105	FetalLeydig-like	TCFL5-E
6.67325e-108	-0.74422	0.179	0.483	9.24245e-105	sPAX8m	ZSCAN29-E
6.77842e-108	0.942651	0.705	0.442	9.38811e-105	preGC_IIb	PGR-A
7.05855e-108	-0.46286	0.313	0.518	9.77609e-105	Sertoli_WFDC2	FOXN3-E
8.73818e-108	-1.09267	0.15	0.471	1.21024e-104	FetalLeydig-like	ZNF585B-E
8.80241e-108	0.711058	0.754	0.45	1.21913e-104	granulosa	HEY2-E
9.15152e-108	1.11854	0.774	0.502	1.26749e-104	FetalLeydig-like	ZIC2-E
1.08553e-107	0.963486	0.719	0.429	1.50346e-104	preGC_I	BATF2-E
1.21359e-107	-1.21083	0.128	0.47	1.68082e-104	FetalLeydig-like	ZNF253-E
1.26908e-107	-0.722281	0.179	0.509	1.75768e-104	sPAX8m	DMTF1-E
1.45306e-107	-0.791509	0.215	0.505	2.01248e-104	sPAX8m	ESX1-E
1.84078e-107	-0.844992	0.182	0.486	2.54948e-104	sPAX8m	PDX1-C
1.85014e-107	-0.701232	0.19	0.496	2.56244e-104	sPAX8m	PRDM2-E
2.17129e-107	-0.751987	0.241	0.495	3.00724e-104	Sertoli_WFDC2	HOXD10-E
2.21996e-107	-0.694571	0.197	0.501	3.07465e-104	sPAX8m	CNOT4-E
2.32133e-107	0.622132	0.763	0.472	3.21504e-104	preGC_IIb	NFKBIE-E
2.45308e-107	-0.852165	0.194	0.497	3.39752e-104	Sertoli	ZBTB12-E
2.71109e-107	-0.985729	0.164	0.485	3.75485e-104	Sertoli	ZNF837-E
2.94656e-107	-0.931012	0.157	0.575	4.08098e-104	sPAX8e	FOXS1-E
2.97941e-107	0.815947	0.692	0.471	4.12648e-104	Sertoli_WFDC2	KAT6A-E
3.36337e-107	-0.886342	0.205	0.48	4.65826e-104	sPAX8m	ZNF124-E
5.17138e-107	-0.750037	0.204	0.513	7.16236e-104	sPAX8m	ZFP91-E
5.63919e-107	-0.908117	0.183	0.452	7.81028e-104	sKITLG	FOSL2-A
7.42657e-107	0.590603	0.771	0.495	1.02858e-103	Sertoli_WFDC2	HOXA10-B
8.42713e-107	-0.645159	0.27	0.53	1.16716e-103	coelEpi	ZNF382-B
8.67664e-107	-0.763859	0.209	0.533	1.20171e-103	sPAX8m	NR2F6-B
9.37087e-107	1.1674	0.701	0.453	1.29786e-103	preGC_IIb	RELA-AA
1.05741e-106	-0.860343	0.204	0.489	1.46452e-103	FetalLeydig-like	KLF8-E
1.07077e-106	-0.503137	0.209	0.478	1.48301e-103	FetalLeydig-like	ARID5B-E
1.81835e-106	-0.993992	0.172	0.483	2.51841e-103	FetalLeydig-like	HOXD9-E
1.94646e-106	-1.06794	0.167	0.483	2.69584e-103	FetalLeydig-like	NR0B1-B
2.03588e-106	0.509857	0.816	0.479	2.8197e-103	Sertoli	SALL3-E
2.71689e-106	-0.519164	0.183	0.481	3.7629e-103	sPAX8m	ZNF142-E
2.73591e-106	1.14295	0.772	0.495	3.78923e-103	FetalLeydig-like	ZIC5-E
2.9259e-106	-1.04221	0.161	0.48	4.05237e-103	FetalLeydig-like	THAP9-E
4.32608e-106	-0.763409	0.196	0.516	5.99162e-103	sPAX8m	ZNF721-E
4.78393e-106	0.872622	0.74	0.453	6.62575e-103	granulosa	SOX8-E
5.23811e-106	-1.17406	0.183	0.476	7.25478e-103	sKITLG	EBF2-E
6.90008e-106	0.639097	0.779	0.445	9.55661e-103	sKITLG	ZFP69B-E
7.47727e-106	-0.696203	0.196	0.508	1.0356e-102	Sertoli	ZNF33B-E
7.62029e-106	1.12091	0.772	0.495	1.05541e-102	FetalLeydig-like	LHX1-E
9.61814e-106	-0.733179	0.202	0.493	1.33211e-102	FetalLeydig-like	KLF11-E
9.70933e-106	-1.16898	0.128	0.5	1.34474e-102	FetalLeydig-like	POU3F3-E
1.22789e-105	-0.749022	0.197	0.513	1.70063e-102	sPAX8m	ZNF141-E
1.25742e-105	-0.812678	0.237	0.493	1.74152e-102	ovarianSurf	POU2F1-A
2.04035e-105	-0.68361	0.181	0.524	2.82588e-102	sPAX8m	IKZF5-E
2.04204e-105	-1.09363	0.177	0.481	2.82822e-102	Sertoli_WFDC2	ZNF521-E
2.2145e-105	-0.68379	0.195	0.498	3.06709e-102	sPAX8m	PBRM1-E
2.49735e-105	-0.784759	0.248	0.547	3.45884e-102	sPAX8m	NR2F1-B
2.83213e-105	-0.77582	0.202	0.494	3.9225e-102	FetalLeydig-like	TEF-E
3.02515e-105	-0.976767	0.165	0.473	4.18983e-102	FetalLeydig-like	ZKSCAN2-E
3.20913e-105	-0.7432	0.228	0.52	4.44465e-102	Sertoli	ELF5-C
3.55454e-105	-0.662181	0.185	0.5	4.92303e-102	sPAX8m	RC3H2-E
3.56453e-105	-0.91065	0.159	0.575	4.93688e-102	sPAX8m	FOXS1-E
4.3224e-105	-0.659878	0.17	0.484	5.98652e-102	FetalLeydig-like	ZSCAN9-E
4.9633e-105	-0.798149	0.211	0.495	6.87417e-102	FetalLeydig-like	ZNF669-E
5.02962e-105	0.73401	0.745	0.457	6.96602e-102	granulosa	GRHL2-C
5.36584e-105	-0.691313	0.178	0.476	7.43168e-102	FetalLeydig-like	ZNF169-E
5.57318e-105	-1.01102	0.2	0.489	7.71885e-102	preGC_IIa	ATOH8-E
5.90002e-105	-0.753236	0.191	0.486	8.17153e-102	FetalLeydig-like	ZNF286A-E
6.48422e-105	-0.827803	0.182	0.483	8.98064e-102	sPAX8m	ZNF468-E
6.60646e-105	-0.790354	0.189	0.501	9.14995e-102	sPAX8m	ZNF432-E
7.15693e-105	1.0397	0.772	0.502	9.91235e-102	FetalLeydig-like	ZBTB4-E
8.03619e-105	-1.12003	0.143	0.464	1.11301e-101	FetalLeydig-like	ZNF619-E
8.18367e-105	0.53096	0.806	0.516	1.13344e-101	ovarianSurf	SSRP1-C
8.46429e-105	1.13427	0.77	0.488	1.1723e-101	FetalLeydig-like	DMRTC2-E
9.59984e-105	0.802215	0.718	0.47	1.32958e-101	Sertoli_WFDC2	TSC22D4-D
1.09342e-104	-0.730408	0.222	0.504	1.51439e-101	sLGR5_female	GATA4-B
1.09969e-104	0.537265	0.799	0.491	1.52307e-101	sPAX8m	GATAD2B-E
1.13323e-104	-1.06448	0.13	0.479	1.56952e-101	FetalLeydig-like	ARID1B-C
2.19401e-104	-0.803701	0.217	0.509	3.0387e-101	sPAX8m	SHOX2-E
2.3451e-104	-0.790266	0.204	0.493	3.24796e-101	FetalLeydig-like	SIX1-E
2.39413e-104	-0.675359	0.187	0.51	3.31587e-101	sPAX8m	ZKSCAN8-E
2.58905e-104	-0.867838	0.216	0.484	3.58583e-101	coelEpi	KDM2A-E
2.79002e-104	-0.751989	0.243	0.525	3.86417e-101	Sertoli_WFDC2	TBP-B
2.86675e-104	-0.881497	0.198	0.508	3.97045e-101	Sertoli	ZNF444-E
2.92424e-104	-0.515673	0.311	0.526	4.05008e-101	Sertoli_WFDC2	ZIC2-E
2.93306e-104	-0.94186	0.176	0.487	4.06229e-101	Sertoli	STAT5A-AA
3.3684e-104	-0.766317	0.206	0.506	4.66524e-101	sPAX8m	PAX4-E
3.39739e-104	-1.13907	0.141	0.481	4.70539e-101	FetalLeydig-like	TRERF1-E
3.48153e-104	-0.980266	0.205	0.483	4.82192e-101	coelEpi	IKZF2-E
3.8085e-104	-0.637953	0.177	0.492	5.27477e-101	sPAX8m	ZNF507-E
4.11545e-104	-0.64488	0.189	0.488	5.6999e-101	FetalLeydig-like	ZNF432-E
4.42376e-104	0.521756	0.795	0.489	6.12691e-101	sKITLG	ATF5-E
5.73211e-104	0.714864	0.729	0.432	7.93897e-101	sKITLG	ZNF749-E
6.21026e-104	1.19997	0.759	0.502	8.60121e-101	FetalLeydig-like	SOHLH1-E
6.80939e-104	-0.798072	0.226	0.514	9.431e-101	sPAX8e	NFKBIE-E
6.88831e-104	1.36249	0.669	0.467	9.54031e-101	coelEpi	NFIX-E
7.03936e-104	-0.704513	0.208	0.485	9.74952e-101	sPAX8m	HIVEP1-E
9.23204e-104	-0.763234	0.207	0.506	1.27864e-100	sPAX8m	VSX2-E
9.40371e-104	0.599584	0.772	0.499	1.30241e-100	ovarianSurf	ZNF16-E
1.06252e-103	0.695216	0.745	0.457	1.47158e-100	preGC_IIb	TCF7L2-A
1.20676e-103	1.12924	0.774	0.493	1.67137e-100	FetalLeydig-like	NKX2-2-E
1.53189e-103	-0.778169	0.178	0.481	2.12167e-100	sPAX8m	ZBTB37-E
2.25121e-103	0.887352	0.833	0.422	3.11792e-100	FetalLeydig-like	GATA6-B
2.30174e-103	-1.00709	0.174	0.488	3.18791e-100	FetalLeydig-like	RORB-E
2.95074e-103	-0.759936	0.207	0.507	4.08677e-100	sPAX8m	LHX8-E
3.0838e-103	0.764386	0.688	0.453	4.27107e-100	Sertoli_WFDC2	ZBTB38-E
3.40889e-103	-1.0102	0.163	0.471	4.72131e-100	FetalLeydig-like	ZNF525-E
3.91533e-103	0.70787	0.746	0.438	5.42273e-100	ovarianSurf	NPAS1-E
4.22196e-103	0.451156	0.841	0.51	5.84742e-100	sKITLG	ZNF277-E
4.91129e-103	-0.650516	0.207	0.492	6.80213e-100	sPAX8m	ZNF407-E
7.82609e-103	0.581096	0.776	0.451	1.08391e-99	sKITLG	ZNF26-E
9.41066e-103	-0.871349	0.165	0.482	1.30338e-99	FetalLeydig-like	ZNF117-E
9.43559e-103	0.989964	0.798	0.515	1.30683e-99	FetalLeydig-like	ETV3-E
1.0032e-102	0.949297	0.822	0.512	1.38943e-99	FetalLeydig-like	ZC3H8-D
1.12594e-102	-1.16734	0.139	0.466	1.55943e-99	FetalLeydig-like	PRDM8-E
1.35054e-102	1.11154	0.77	0.493	1.8705e-99	FetalLeydig-like	NEUROD6-E
1.35296e-102	-0.936953	0.163	0.507	1.87385e-99	FetalLeydig-like	SP1-AA
1.36567e-102	-0.762944	0.219	0.517	1.89146e-99	sPAX8m	ZNF483-E
1.48798e-102	0.787324	0.7	0.462	2.06085e-99	Sertoli_WFDC2	ZNF275-E
1.78814e-102	-0.765073	0.234	0.552	2.47658e-99	sPAX8e	ZNF524-E
1.79641e-102	-0.765207	0.252	0.519	2.48802e-99	preGC_IIb	YBX3-E
2.69202e-102	-0.734094	0.187	0.496	3.72845e-99	sPAX8m	HOXC9-E
2.79003e-102	-0.622163	0.215	0.508	3.86419e-99	sPAX8m	KAT6A-E
2.87814e-102	0.765135	0.726	0.51	3.98622e-99	sPAX8m	SRF-A
3.08697e-102	-0.756358	0.177	0.508	4.27546e-99	sPAX8m	ZNF160-E
3.47736e-102	0.760598	0.695	0.452	4.81614e-99	Sertoli_WFDC2	ZNF518B-E
3.55951e-102	-0.499778	0.207	0.487	4.92993e-99	FetalLeydig-like	NFX1-E
3.6399e-102	-0.750396	0.179	0.505	5.04126e-99	sPAX8m	ZNF841-E
4.59856e-102	-0.682937	0.176	0.495	6.369e-99	sPAX8m	MIER3-E
4.87783e-102	0.843214	0.686	0.479	6.7558e-99	Sertoli_WFDC2	ZFP1-E
5.77323e-102	-0.695583	0.204	0.488	7.99592e-99	FetalLeydig-like	HOXC12-E
6.02193e-102	-0.79049	0.197	0.477	8.34037e-99	sPAX8m	ZNF8-E
6.61001e-102	-1.53579	0.17	0.469	9.15486e-99	Sertoli	ZNF423-E
8.13423e-102	-0.622998	0.176	0.488	1.12659e-98	sPAX8m	ZBTB41-E
9.02065e-102	0.814938	0.699	0.482	1.24936e-98	Sertoli_WFDC2	ZC3H6-E
9.07844e-102	0.52298	0.793	0.496	1.25736e-98	sPAX8m	RFX3-E
1.15956e-101	0.648006	0.743	0.432	1.60599e-98	sKITLG	TADA2A-E
1.17265e-101	-0.487731	0.226	0.493	1.62411e-98	FetalLeydig-like	ZNFX1-E
1.31396e-101	-0.809678	0.206	0.503	1.81984e-98	sPAX8m	HESX1-E
1.32336e-101	-0.835383	0.174	0.485	1.83286e-98	sPAX8m	ZNF678-E
1.46826e-101	-0.689657	0.206	0.49	2.03354e-98	sPAX8m	ZNF518B-E
1.6197e-101	0.95044	0.657	0.418	2.24328e-98	sPAX8m	PAX3-B
1.84799e-101	-0.753689	0.212	0.503	2.55947e-98	Sertoli	ZBTB22-E
2.18024e-101	0.672052	0.732	0.51	3.01963e-98	Sertoli_WFDC2	MESP1-E
2.18936e-101	0.664704	0.746	0.468	3.03227e-98	preGC_IIb	THRB-D
2.26132e-101	-0.827738	0.219	0.508	3.13192e-98	Sertoli	ELF4-E
3.79444e-101	-0.854745	0.189	0.496	5.2553e-98	FetalLeydig-like	EGR4-E
3.93246e-101	-0.742207	0.239	0.547	5.44646e-98	sPAX8e	ZNF787-E
4.11114e-101	-0.545245	0.301	0.529	5.69393e-98	Sertoli_WFDC2	NHLH2-E
4.59036e-101	0.95575	0.793	0.528	6.35765e-98	FetalLeydig-like	ZHX3-E
4.81002e-101	-0.508651	0.211	0.499	6.66187e-98	FetalLeydig-like	ZNF146-E
6.70278e-101	-0.674262	0.198	0.472	9.28335e-98	FetalLeydig-like	NFKBID-E
7.44552e-101	-0.771529	0.249	0.492	1.0312e-97	Sertoli_WFDC2	FOXM1-B
8.30508e-101	-0.82631	0.219	0.479	1.15025e-97	coelEpi	ZBTB40-E
1.03724e-100	-1.03627	0.183	0.477	1.43657e-97	FetalLeydig-like	ZNF714-E
1.18822e-100	-0.764085	0.208	0.493	1.64569e-97	sPAX8m	PHOX2B-E
1.2962e-100	0.771671	0.701	0.474	1.79523e-97	Sertoli_WFDC2	ZNF197-D
1.56127e-100	-0.749643	0.249	0.513	2.16236e-97	granulosa	FOXO1-AA
1.6123e-100	1.14294	0.763	0.485	2.23304e-97	FetalLeydig-like	IKZF3-E
4.22331e-100	1.1058	0.772	0.508	5.84929e-97	FetalLeydig-like	LRRFIP1-E
4.2445e-100	-0.85257	0.193	0.499	5.87864e-97	FetalLeydig-like	ARID2-C
8.37618e-100	-0.828903	0.193	0.491	1.1601e-96	sPAX8m	ZNF462-E
8.8045e-100	-1.12874	0.146	0.477	1.21942e-96	FetalLeydig-like	PBX2-C
9.64436e-100	-0.735514	0.184	0.504	1.33574e-96	sPAX8m	ZNF506-E
1.03168e-99	-0.905308	0.176	0.482	1.42888e-96	FetalLeydig-like	PHOX2B-E
1.22769e-99	-0.712855	0.214	0.49	1.70035e-96	sPAX8m	ZNF805-E
1.29833e-99	-0.861448	0.208	0.485	1.79819e-96	Sertoli	ZSCAN2-E
1.35056e-99	-0.792882	0.198	0.495	1.87052e-96	sPAX8m	ZNF254-E
1.58159e-99	-0.756605	0.222	0.528	2.1905e-96	sPAX8e	ZNF579-E
2.14393e-99	-0.7312	0.205	0.524	2.96935e-96	sPAX8m	ZNF548-E
2.61176e-99	0.467537	0.819	0.502	3.61728e-96	Sertoli	ZNF653-E
2.76387e-99	-0.789798	0.182	0.442	3.82796e-96	sLGR5_female	KLF10-D
2.99766e-99	-0.717771	0.239	0.526	4.15175e-96	sKITLG	IRX3-E
3.27373e-99	1.05762	0.785	0.506	4.53412e-96	FetalLeydig-like	TSC22D1-E
3.36549e-99	0.52855	0.774	0.507	4.6612e-96	sLGR5_female	BHLHE22-C
3.50676e-99	-0.758367	0.198	0.505	4.85686e-96	sPAX8m	PRDM4-E
3.68402e-99	-0.666322	0.186	0.493	5.10236e-96	sPAX8m	PURA-E
4.05394e-99	-0.60852	0.209	0.485	5.61471e-96	sPAX8m	ARID3B-E
4.14938e-99	0.617882	0.709	0.443	5.74689e-96	Sertoli_WFDC2	IKZF2-E
4.30376e-99	-0.74455	0.205	0.483	5.96071e-96	sPAX8m	MAFK-C
4.5428e-99	1.3096	0.682	0.454	6.29177e-96	granulosa	ZNF516-E
5.39661e-99	-0.719768	0.246	0.52	7.4743e-96	Sertoli	ZBED1-C
6.89383e-99	0.69486	0.738	0.486	9.54796e-96	granulosa	EBF3-E
6.93098e-99	-0.864956	0.163	0.496	9.59941e-96	FetalLeydig-like	HOXC10-E
6.98232e-99	-0.82434	0.152	0.461	9.67052e-96	FetalLeydig-like	ZKSCAN5-E
7.55432e-99	-0.316746	0.191	0.482	1.04627e-95	FetalLeydig-like	ZNF133-E
7.80919e-99	-0.818907	0.221	0.52	1.08157e-95	sPAX8e	NFAT5-E
1.03801e-98	-0.809504	0.185	0.503	1.43765e-95	Sertoli	DNAJC2-E
1.1272e-98	0.769263	0.73	0.465	1.56117e-95	granulosa	ZNF644-D
1.13878e-98	-1.09161	0.159	0.467	1.57722e-95	FetalLeydig-like	ZNF43-E
1.56383e-98	0.896703	0.82	0.522	2.1659e-95	FetalLeydig-like	ZNF300-E
1.74895e-98	-0.910412	0.225	0.475	2.42229e-95	coelEpi	ZNF8-E
1.87398e-98	0.496601	0.805	0.501	2.59546e-95	sPAX8m	ZBTB1-E
1.96572e-98	-0.883343	0.203	0.495	2.72252e-95	sPAX8m	NR2E1-E
2.0086e-98	0.797754	0.73	0.442	2.78191e-95	Sertoli	NFE2-C
2.47432e-98	-0.753834	0.23	0.527	3.42694e-95	sPAX8e	ZNF771-E
3.37033e-98	-0.697502	0.18	0.495	4.66791e-95	sPAX8m	PHTF2-E
3.561e-98	-0.762086	0.197	0.503	4.93199e-95	sPAX8m	ZNF267-E
3.61701e-98	-1.15183	0.124	0.471	5.00956e-95	FetalLeydig-like	ZNF14-E
3.67023e-98	-0.882079	0.196	0.477	5.08326e-95	sPAX8m	ZNF675-E
4.25015e-98	0.606836	0.754	0.459	5.88646e-95	coelEpi	MYB-A
4.61356e-98	0.547323	0.585	0.345	6.38978e-95	Sertoli	MZF1-D
5.04326e-98	0.527296	0.805	0.465	6.98491e-95	sKITLG	ZNF146-E
6.63691e-98	-0.644404	0.266	0.513	9.19212e-95	sKITLG	ASCL2-E
6.99297e-98	0.500063	0.813	0.506	9.68526e-95	sPAX8m	RCOR3-E
8.00208e-98	-0.795007	0.208	0.492	1.10829e-94	sPAX8m	ZNF234-E
9.48879e-98	-0.786017	0.165	0.475	1.3142e-94	FetalLeydig-like	ZNF28-E
1.0456e-97	0.886196	0.826	0.504	1.44816e-94	FetalLeydig-like	DMBX1-E
1.15434e-97	0.50287	0.788	0.481	1.59876e-94	sPAX8e	FOXN3-E
1.39779e-97	0.45464	0.78	0.433	1.93593e-94	Sertoli_WFDC2	NR5A2-B
1.41339e-97	-0.619158	0.199	0.499	1.95755e-94	sPAX8m	ZBTB44-E
1.52034e-97	1.21893	0.69	0.468	2.10567e-94	coelEpi	HOXB2-E
1.87938e-97	-0.842391	0.239	0.494	2.60295e-94	Sertoli_WFDC2	ATF4-AA
2.12732e-97	-0.965506	0.176	0.49	2.94634e-94	FetalLeydig-like	MYBL1-E
2.3488e-97	-0.965818	0.191	0.482	3.25309e-94	FetalLeydig-like	ZNF528-E
2.49286e-97	-0.789599	0.202	0.494	3.45262e-94	FetalLeydig-like	ZNF644-D
2.68484e-97	0.637972	0.775	0.586	3.7185e-94	sPAX8e	ETV6-C
3.32537e-97	1.04716	0.711	0.466	4.60564e-94	granulosa	PBX1-E
3.43531e-97	-0.603719	0.192	0.495	4.7579e-94	sPAX8m	ZNF33A-E
3.43657e-97	0.61144	0.775	0.459	4.75965e-94	ovarianSurf	RUNX1-AA
3.75297e-97	-0.815922	0.198	0.49	5.19786e-94	FetalLeydig-like	NKX2-8-E
4.43533e-97	-0.877921	0.185	0.501	6.14293e-94	FetalLeydig-like	BSX-E
4.43533e-97	-0.877921	0.185	0.501	6.14293e-94	FetalLeydig-like	RAX2-E
4.87921e-97	0.448756	0.82	0.498	6.7577e-94	Sertoli	FIZ1-E
5.73319e-97	-0.753544	0.2	0.492	7.94046e-94	sPAX8m	NR1D1-B
6.68737e-97	-0.460858	0.2	0.483	9.26201e-94	FetalLeydig-like	GMEB1-E
7.07274e-97	0.924594	0.796	0.512	9.79575e-94	FetalLeydig-like	GZF1-E
7.38132e-97	-0.739882	0.2	0.501	1.02231e-93	sPAX8m	ZNF800-E
7.40471e-97	0.715253	0.718	0.456	1.02555e-93	preGC_I	SALL2-E
7.44302e-97	-0.779	0.176	0.468	1.03086e-93	FetalLeydig-like	ZNF398-E
8.77915e-97	-0.827623	0.178	0.482	1.21591e-93	FetalLeydig-like	PBX3-C
1.07056e-96	-0.451816	0.211	0.492	1.48272e-93	FetalLeydig-like	PRDM4-E
1.19023e-96	-0.713943	0.191	0.484	1.64847e-93	FetalLeydig-like	TFAP2E-E
1.28696e-96	-0.879855	0.189	0.502	1.78244e-93	FetalLeydig-like	SHOX-E
1.29466e-96	-0.686323	0.133	0.477	1.7931e-93	FetalLeydig-like	FOXF1-E
1.52348e-96	0.820774	0.702	0.482	2.11002e-93	sPAX8e	SNAI1-B
1.57601e-96	0.814457	0.702	0.447	2.18277e-93	granulosa	PLAGL1-E
1.6001e-96	-0.875606	0.191	0.491	2.21614e-93	FetalLeydig-like	HMX1-E
2.00223e-96	0.805654	0.705	0.441	2.77309e-93	ovarianSurf	PPP1R13L-E
2.52051e-96	0.646232	0.738	0.476	3.49091e-93	preGC_IIb	SP1-AA
2.53728e-96	-0.719748	0.223	0.502	3.51413e-93	sPAX8m	ZNF350-E
2.95114e-96	-0.576179	0.174	0.472	4.08733e-93	FetalLeydig-like	ZBTB24-E
3.08625e-96	-0.733202	0.198	0.519	4.27446e-93	Sertoli	TOX4-E
3.49349e-96	0.492349	0.793	0.512	4.83848e-93	Sertoli_WFDC2	SMAD7-B
4.06558e-96	-0.760413	0.235	0.505	5.63083e-93	Sertoli	ZNF442-E
4.09485e-96	-1.12903	0.124	0.466	5.67137e-93	FetalLeydig-like	ZNF391-E
4.12652e-96	0.611669	0.765	0.488	5.71523e-93	coelEpi	GLI1-B
5.39772e-96	-0.678252	0.209	0.492	7.47585e-93	sPAX8m	ADNP-D
5.8457e-96	-0.904585	0.194	0.47	8.0963e-93	Sertoli	ZNF425-E
6.36732e-96	0.496897	0.79	0.5	8.81873e-93	sPAX8m	GZF1-E
8.75574e-96	0.696974	0.733	0.435	1.21267e-92	sPAX8m	HAND2-E
9.2384e-96	-0.678235	0.21	0.495	1.27952e-92	sPAX8m	GRHL1-E
9.30291e-96	-1.12304	0.146	0.48	1.28845e-92	FetalLeydig-like	ZNF626-E
1.11365e-95	1.09789	0.772	0.504	1.54241e-92	FetalLeydig-like	NHLH2-E
1.27508e-95	1.1248	0.681	0.468	1.76599e-92	coelEpi	PRDM6-E
1.31075e-95	0.727374	0.698	0.467	1.81538e-92	Sertoli_WFDC2	ZNFX1-E
1.319e-95	-0.68073	0.193	0.491	1.82682e-92	sPAX8m	ZNF510-E
1.40642e-95	-0.997947	0.196	0.474	1.94789e-92	sPAX8m	SP110-E
1.58108e-95	-0.913716	0.17	0.515	2.18979e-92	FetalLeydig-like	ETV4-A
1.5866e-95	-0.651357	0.268	0.535	2.19744e-92	sKITLG	HOXA10-B
1.75354e-95	-0.839714	0.189	0.484	2.42866e-92	sPAX8m	ZNF417-E
1.84724e-95	0.732842	0.72	0.457	2.55843e-92	Sertoli_WFDC2	HOXC13-E
1.94978e-95	-0.950405	0.167	0.499	2.70045e-92	FetalLeydig-like	HOXA2-E
2.09049e-95	-0.837463	0.221	0.528	2.89533e-92	granulosa	MYC-AA
2.10543e-95	-0.848513	0.161	0.506	2.91602e-92	FetalLeydig-like	ESR1-AA
2.41054e-95	-1.0547	0.152	0.475	3.33859e-92	FetalLeydig-like	ZNF426-E
2.42746e-95	0.549076	0.761	0.472	3.36204e-92	Sertoli	TCF25-C
3.30608e-95	-0.865357	0.193	0.503	4.57892e-92	FetalLeydig-like	LHX9-E
3.47802e-95	-0.769457	0.19	0.496	4.81706e-92	sPAX8m	ZNF37A-E
3.6501e-95	-0.710942	0.201	0.493	5.05538e-92	sPAX8m	ZNF708-E
4.04212e-95	-0.692404	0.279	0.552	5.59833e-92	sKITLG	ZNF300-E
5.81566e-95	-1.00022	0.157	0.46	8.05469e-92	FetalLeydig-like	ZNF808-E
6.10262e-95	0.460808	0.793	0.486	8.45213e-92	Sertoli	FEV-E
6.27398e-95	-0.761446	0.244	0.512	8.68946e-92	ovarianSurf	ZSCAN1-E
6.29254e-95	0.677436	0.713	0.466	8.71517e-92	Sertoli_WFDC2	GATA5-E
7.25013e-95	0.786277	0.741	0.458	1.00414e-91	granulosa	TBX15-E
7.53265e-95	-0.871515	0.206	0.49	1.04327e-91	Sertoli	ZFP69B-E
8.05332e-95	0.078263	0.215	0.469	1.11538e-91	FetalLeydig-like	ZBTB47-E
9.14978e-95	-0.806747	0.185	0.504	1.26724e-91	FetalLeydig-like	SCRT2-E
9.70662e-95	0.727751	0.72	0.456	1.34437e-91	preGC_IIb	TCF7L1-D
9.93175e-95	-0.710675	0.196	0.494	1.37555e-91	sPAX8m	ZNF248-E
1.00915e-94	0.726919	0.716	0.447	1.39768e-91	preGC_IIb	TSC22D2-E
1.03195e-94	0.783326	0.716	0.474	1.42925e-91	granulosa	UNCX-E
1.04075e-94	-0.749622	0.233	0.533	1.44144e-91	sPAX8e	ATF5-E
1.04541e-94	-1.04446	0.15	0.477	1.4479e-91	FetalLeydig-like	ZNF17-E
1.08204e-94	1.32622	0.673	0.444	1.49862e-91	granulosa	ZNF532-E
1.55594e-94	-0.59621	0.215	0.489	2.15498e-91	FetalLeydig-like	ZNF362-E
1.58853e-94	-0.786824	0.202	0.483	2.20011e-91	sPAX8m	ZBTB24-E
1.67355e-94	-0.605866	0.209	0.473	2.31787e-91	FetalLeydig-like	ZNF562-E
1.91001e-94	-0.785198	0.214	0.491	2.64537e-91	sPAX8m	ALX3-E
2.00465e-94	-0.131768	0.246	0.492	2.77644e-91	FetalLeydig-like	TGIF1-E
2.28064e-94	0.365503	0.787	0.428	3.15868e-91	granulosa	TBX2-E
2.53276e-94	-0.871056	0.174	0.483	3.50787e-91	FetalLeydig-like	ZIM3-E
2.67636e-94	-0.775865	0.197	0.512	3.70676e-91	sPAX8m	ZNF146-E
2.99917e-94	-0.814583	0.222	0.489	4.15385e-91	coelEpi	EPAS1-B
3.30953e-94	-0.719958	0.198	0.499	4.5837e-91	FetalLeydig-like	KMT2B-D
3.64576e-94	-0.940959	0.182	0.495	5.04938e-91	Sertoli	TONSL-E
3.69605e-94	0.589081	0.766	0.45	5.11903e-91	Sertoli	HNF4G-C
3.73808e-94	-0.679533	0.249	0.476	5.17724e-91	coelEpi	ZNF142-E
4.07824e-94	-0.793405	0.22	0.496	5.64836e-91	sPAX8m	ZNF571-E
4.79301e-94	0.477738	0.793	0.519	6.63832e-91	Sertoli	ZNF396-E
5.66071e-94	-0.975703	0.133	0.478	7.84008e-91	FetalLeydig-like	ZNF880-E
5.95079e-94	-0.569534	0.215	0.479	8.24184e-91	FetalLeydig-like	ZNF7-E
6.40277e-94	-0.771192	0.229	0.496	8.86784e-91	sPAX8m	DMRT3-E
6.69558e-94	0.805138	0.798	0.531	9.27338e-91	FetalLeydig-like	IKZF4-E
7.65101e-94	-0.674705	0.253	0.486	1.05966e-90	sLGR5_female	NR4A3-B
8.55007e-94	-0.618731	0.23	0.503	1.18418e-90	FetalLeydig-like	DBP-E
9.24855e-94	0.533473	0.812	0.515	1.28092e-90	ovarianSurf	NR2F2-B
1.02593e-93	-0.646865	0.209	0.499	1.42092e-90	sPAX8m	KAT7-E
1.05403e-93	1.3769	0.651	0.45	1.45983e-90	coelEpi	ZNF467-E
1.30262e-93	0.796485	0.75	0.477	1.80413e-90	coelEpi	IRX2-E
1.58641e-93	-0.742651	0.221	0.491	2.19717e-90	sPAX8m	HOXB3-E
1.62149e-93	-0.741224	0.18	0.499	2.24576e-90	sPAX8m	ZNF286A-E
1.62325e-93	1.12861	0.678	0.421	2.2482e-90	preGC_I	STAT2-B
1.88548e-93	0.587293	0.753	0.465	2.61139e-90	sLGR5_female	SOX4-E
2.47704e-93	-0.635791	0.239	0.468	3.43071e-90	FetalLeydig-like	ZBTB40-E
2.75278e-93	-0.687535	0.208	0.487	3.8126e-90	sPAX8m	ZNF518A-E
2.77838e-93	-0.918381	0.17	0.492	3.84805e-90	FetalLeydig-like	NKX2-5-E
4.25799e-93	0.305987	0.799	0.428	5.89731e-90	sPAX8m	EBF2-E
4.75584e-93	-1.03135	0.206	0.459	6.58683e-90	sKITLG	SOX9-A
4.90572e-93	-0.833401	0.2	0.481	6.79442e-90	sPAX8m	ZNF525-E
6.23452e-93	-0.732514	0.207	0.492	8.63481e-90	sPAX8m	ELMSAN1-E
6.36381e-93	0.667767	0.735	0.465	8.81388e-90	sPAX8m	FOXO3-AA
7.71883e-93	0.736188	0.727	0.462	1.06906e-89	granulosa	ZNF217-C
8.27315e-93	-0.772536	0.232	0.498	1.14583e-89	sKITLG	GRHL2-C
8.28452e-93	-0.489864	0.272	0.547	1.14741e-89	Sertoli_WFDC2	ELK1-AA
8.44232e-93	-0.617264	0.205	0.494	1.16926e-89	sPAX8m	ZNF260-E
9.78537e-93	-0.540913	0.326	0.546	1.35527e-89	granulosa	TRPS1-E
1.12074e-92	-1.16786	0.148	0.47	1.55222e-89	FetalLeydig-like	ZNF429-E
1.37025e-92	-0.948152	0.187	0.476	1.8978e-89	FetalLeydig-like	ZNF652-E
1.47366e-92	-0.47912	0.226	0.498	2.04102e-89	FetalLeydig-like	MEF2D-E
1.77624e-92	-0.910139	0.176	0.495	2.4601e-89	FetalLeydig-like	POU2F3-E
1.79494e-92	-0.699825	0.206	0.486	2.48599e-89	sPAX8m	ZNF264-E
1.80373e-92	-0.749733	0.251	0.514	2.49816e-89	ovarianSurf	CEBPA-AA
2.00408e-92	-0.83173	0.18	0.486	2.77565e-89	FetalLeydig-like	SALL4-E
3.02868e-92	-0.72809	0.204	0.495	4.19472e-89	sPAX8m	ZNF354A-E
3.21713e-92	0.514476	0.777	0.497	4.45573e-89	sPAX8m	TOX3-E
3.27593e-92	-0.633446	0.216	0.496	4.53717e-89	sPAX8m	MTF1-E
3.40453e-92	-0.914557	0.163	0.482	4.71527e-89	FetalLeydig-like	HOXB3-E
3.59205e-92	0.550247	0.752	0.456	4.97499e-89	Sertoli	RXRG-D
3.78917e-92	-0.865565	0.172	0.479	5.248e-89	FetalLeydig-like	ALX1-E
6.1394e-92	0.735022	0.701	0.464	8.50307e-89	Sertoli_WFDC2	SRY-E
6.17641e-92	-0.936404	0.202	0.511	8.55433e-89	FetalLeydig-like	ZBED1-C
6.71819e-92	-0.501839	0.318	0.526	9.30469e-89	Sertoli_WFDC2	SOHLH1-E
8.60435e-92	0.800335	0.665	0.473	1.1917e-88	Sertoli_WFDC2	ZNF770-E
1.11578e-91	-0.605871	0.18	0.495	1.54536e-88	FetalLeydig-like	JUNB-C
1.19241e-91	0.831012	0.876	0.49	1.65149e-88	FetalLeydig-like	HNF4A-AA
1.19403e-91	-0.726363	0.203	0.502	1.65374e-88	sPAX8m	ARID3A-C
1.39348e-91	0.463967	0.779	0.484	1.92998e-88	preGC_IIb	MYC-AA
1.6287e-91	0.485703	0.807	0.511	2.25575e-88	sPAX8m	ZNF354C-E
1.68703e-91	-0.521148	0.283	0.528	2.33654e-88	Sertoli_WFDC2	SPI1-AA
1.96032e-91	-0.74591	0.236	0.523	2.71505e-88	granulosa	ZNF595-E
2.06724e-91	-0.619103	0.215	0.504	2.86312e-88	Sertoli	HOXB4-E
2.19227e-91	-0.769252	0.203	0.491	3.0363e-88	sPAX8m	HMGXB3-E
2.4446e-91	-0.955444	0.207	0.494	3.38577e-88	sKITLG	TOX-E
2.48417e-91	0.542903	0.774	0.499	3.44057e-88	ovarianSurf	ZBED2-E
2.89732e-91	0.700525	0.722	0.45	4.01279e-88	Sertoli_WFDC2	IKZF1-C
3.05582e-91	0.705995	0.723	0.472	4.23231e-88	preGC_IIb	RARG-D
3.26104e-91	-0.702284	0.24	0.51	4.51654e-88	sPAX8m	NKX6-1-E
3.48897e-91	-0.748196	0.196	0.476	4.83222e-88	sPAX8m	ZNF70-E
3.66788e-91	0.753153	0.69	0.468	5.08002e-88	Sertoli_WFDC2	HOXA11-E
3.70842e-91	-0.705176	0.216	0.528	5.13616e-88	sPAX8e	NRL-E
3.75047e-91	-0.846721	0.195	0.502	5.1944e-88	sPAX8m	DNAJC2-E
4.01166e-91	-0.582489	0.339	0.594	5.55615e-88	coelEpi	ATF3-A
4.07818e-91	-0.838113	0.242	0.501	5.64828e-88	Sertoli	NFIX-E
4.67199e-91	-0.517221	0.211	0.49	6.47071e-88	FetalLeydig-like	ZNF775-E
4.87337e-91	1.11742	0.77	0.494	6.74962e-88	FetalLeydig-like	SALL3-E
4.98158e-91	-0.903607	0.167	0.474	6.89949e-88	FetalLeydig-like	SP140L-E
5.33681e-91	-0.767952	0.247	0.52	7.39148e-88	sKITLG	SOX7-E
5.35224e-91	-0.715818	0.208	0.5	7.41286e-88	sPAX8m	ISL2-E
5.62689e-91	-0.744046	0.257	0.536	7.79324e-88	preGC_IIb	ZHX1-D
6.30955e-91	-0.558089	0.174	0.471	8.73872e-88	FetalLeydig-like	ZNF468-E
7.16673e-91	-0.558607	0.209	0.479	9.92592e-88	FetalLeydig-like	ZNF574-E
7.24841e-91	-0.0146981	0.233	0.483	1.00391e-87	FetalLeydig-like	BATF3-E
7.50491e-91	-0.67636	0.239	0.509	1.03943e-87	sPAX8m	GBX1-E
8.47445e-91	0.991316	0.711	0.449	1.17371e-87	sPAX8m	ATOH8-E
9.65323e-91	0.758393	0.675	0.466	1.33697e-87	Sertoli_WFDC2	ARID4A-E
1.14949e-90	-0.738381	0.207	0.502	1.59205e-87	sPAX8m	ZNF761-E
1.20577e-90	-0.911525	0.196	0.466	1.66999e-87	FetalLeydig-like	ZNF8-E
1.32954e-90	-0.689785	0.217	0.491	1.84142e-87	FetalLeydig-like	SRY-E
1.33059e-90	-0.836043	0.172	0.474	1.84287e-87	FetalLeydig-like	ZNF44-E
1.39466e-90	-0.720401	0.245	0.509	1.9316e-87	sKITLG	RBPJ-B
1.58167e-90	0.739098	0.669	0.462	2.19061e-87	Sertoli_WFDC2	RC3H2-E
1.65938e-90	0.550971	0.74	0.464	2.29824e-87	Sertoli_WFDC2	GATA4-B
1.87183e-90	-0.736785	0.251	0.506	2.59249e-87	coelEpi	TBX5-E
1.91947e-90	-0.877246	0.231	0.484	2.65847e-87	coelEpi	ZBTB8B-E
2.12376e-90	-0.813772	0.215	0.542	2.94141e-87	sKITLG	ZBED2-E
2.18096e-90	-1.04885	0.122	0.52	3.02063e-87	FetalLeydig-like	ELF3-B
2.2443e-90	0.782717	0.837	0.503	3.10836e-87	FetalLeydig-like	FOXP2-C
2.47905e-90	0.689787	0.732	0.449	3.43348e-87	granulosa	CASZ1-E
2.53698e-90	-0.780546	0.204	0.519	3.51371e-87	sPAX8m	TOX4-E
2.64621e-90	-0.707784	0.239	0.507	3.66499e-87	sPAX8m	HOXA2-E
2.97288e-90	-0.569243	0.219	0.504	4.11744e-87	sPAX8m	ZNF345-E
4.32965e-90	-0.773711	0.241	0.469	5.99656e-87	Sertoli_WFDC2	SMAD2-B
4.88627e-90	-0.730302	0.22	0.504	6.76749e-87	sPAX8m	ZNF322-E
7.48522e-90	-1.02894	0.122	0.471	1.0367e-86	FetalLeydig-like	ZNF594-E
7.80642e-90	-1.11182	0.198	0.474	1.08119e-86	Sertoli	FOXC2-E
7.92116e-90	-0.816569	0.18	0.486	1.09708e-86	FetalLeydig-like	GLIS1-E
8.27672e-90	-0.71348	0.206	0.512	1.14633e-86	sPAX8m	ZBED5-E
1.08741e-89	-0.788955	0.224	0.549	1.50606e-86	preGC_I	ETV7-E
1.18759e-89	-0.730559	0.258	0.496	1.64481e-86	coelEpi	ZNF83-D
1.2981e-89	0.823695	0.728	0.478	1.79787e-86	granulosa	FOXA3-E
1.32697e-89	-0.663804	0.196	0.482	1.83786e-86	sPAX8m	ZNF45-E
1.46085e-89	0.609996	0.729	0.446	2.02328e-86	sKITLG	ZNF215-E
1.51687e-89	-0.492112	0.209	0.483	2.10086e-86	FetalLeydig-like	ZNF23-E
1.60523e-89	-0.838332	0.204	0.491	2.22325e-86	sPAX8m	ZFP69B-E
1.65994e-89	0.676975	0.718	0.476	2.29901e-86	granulosa	USF1-AA
1.81547e-89	-1.13509	0.204	0.476	2.51443e-86	preGC_IIa	HAND2-E
2.62927e-89	-0.670744	0.191	0.48	3.64154e-86	FetalLeydig-like	ZNF331-E
3.18347e-89	-0.645819	0.245	0.5	4.4091e-86	sLGR5_female	RUNX1-AA
3.47802e-89	0.990467	0.68	0.445	4.81706e-86	granulosa	ZNF827-E
3.50266e-89	-0.438968	0.344	0.581	4.85118e-86	ovarianSurf	HES6-B
3.5255e-89	-0.781829	0.202	0.493	4.88281e-86	FetalLeydig-like	ZNF257-E
3.67224e-89	-0.521979	0.243	0.515	5.08605e-86	FetalLeydig-like	ZFP42-E
3.86589e-89	1.02849	0.774	0.507	5.35426e-86	FetalLeydig-like	ERF-E
3.86649e-89	-0.697053	0.216	0.501	5.35509e-86	sPAX8m	HSF2-E
3.92166e-89	-0.912613	0.161	0.482	5.43149e-86	FetalLeydig-like	PKNOX2-E
4.63306e-89	0.293122	0.923	0.529	6.41679e-86	Sertoli	HOXC11-D
4.83782e-89	-0.579139	0.2	0.5	6.70038e-86	FetalLeydig-like	THAP2-E
5.99528e-89	-0.657183	0.229	0.5	8.30347e-86	Sertoli	GBX2-E
6.10378e-89	0.680666	0.734	0.479	8.45373e-86	ovarianSurf	IRX2-E
6.35112e-89	-0.645176	0.211	0.497	8.7963e-86	FetalLeydig-like	ZNF683-E
8.30136e-89	1.26638	0.663	0.438	1.14974e-85	granulosa	SP110-E
8.43428e-89	-1.00671	0.21	0.484	1.16815e-85	sPAX8m	SP140L-E
8.53259e-89	0.462941	0.798	0.52	1.18176e-85	sPAX8m	IKZF4-E
1.19605e-88	-0.983695	0.224	0.482	1.65652e-85	preGC_IIa	FOXL1-E
1.26779e-88	-0.757836	0.21	0.475	1.75589e-85	sPAX8m	ZNF681-E
1.45271e-88	0.750394	0.695	0.449	2.012e-85	granulosa	BCL11A-C
1.62492e-88	0.629577	0.703	0.472	2.25051e-85	Sertoli_WFDC2	MEF2D-E
1.73225e-88	-0.77365	0.159	0.478	2.39917e-85	FetalLeydig-like	ZNF599-E
1.80055e-88	-0.720107	0.218	0.511	2.49377e-85	Sertoli	GBX1-E
2.0357e-88	-0.775913	0.201	0.495	2.81945e-85	sPAX8m	GMEB1-E
2.18601e-88	-0.264716	0.246	0.496	3.02762e-85	FetalLeydig-like	ZBTB17-E
2.21111e-88	-0.644555	0.22	0.499	3.06239e-85	sPAX8m	POU5F1B-E
2.40143e-88	-1.3799	0.176	0.453	3.32597e-85	preGC_IIa	BNC2-E
2.42865e-88	0.612058	0.747	0.518	3.36369e-85	ovarianSurf	ZNF277-E
2.64884e-88	-0.772713	0.212	0.498	3.66864e-85	Sertoli	ZNF287-E
2.74608e-88	-0.646658	0.202	0.482	3.80333e-85	FetalLeydig-like	ZNF324-E
2.96523e-88	-0.789063	0.217	0.491	4.10684e-85	FetalLeydig-like	NR2E3-E
3.06512e-88	-0.803454	0.217	0.505	4.2452e-85	Sertoli	PRDM6-E
3.22145e-88	-0.803002	0.199	0.486	4.46171e-85	sPAX8m	ZNF28-E
3.23101e-88	-1.01211	0.227	0.506	4.47495e-85	Sertoli	RFX5-AA
3.42348e-88	-0.662171	0.249	0.499	4.74153e-85	coelEpi	ARID3A-C
3.65054e-88	-0.755527	0.259	0.496	5.05599e-85	coelEpi	ZNF275-E
4.4069e-88	-1.01785	0.139	0.486	6.10355e-85	FetalLeydig-like	BARX1-E
4.75312e-88	0.654069	0.734	0.475	6.58307e-85	ovarianSurf	FOXO1-AA
5.41708e-88	-0.274349	0.241	0.504	7.50265e-85	FetalLeydig-like	KAT5-E
5.58769e-88	0.651439	0.715	0.472	7.73895e-85	preGC_IIb	PTF1A-E
5.95729e-88	0.487628	0.775	0.486	8.25084e-85	sPAX8m	SMARCA5-E
6.77568e-88	-0.704705	0.219	0.486	9.38432e-85	sPAX8m	ZNF714-E
6.9763e-88	-0.777017	0.213	0.51	9.66218e-85	sPAX8m	TFAM-E
7.83367e-88	-0.782636	0.263	0.506	1.08496e-84	preGC_IIb	SIM1-E
7.85731e-88	-0.545246	0.237	0.504	1.08824e-84	sPAX8m	ZNF644-D
8.24549e-88	-0.622145	0.228	0.505	1.142e-84	sPAX8m	TBX19-E
8.84304e-88	-0.701925	0.174	0.482	1.22476e-84	FetalLeydig-like	JDP2-E
1.01834e-87	-1.13466	0.148	0.472	1.4104e-84	FetalLeydig-like	ZNF660-E
1.04312e-87	0.700645	0.666	0.466	1.44473e-84	Sertoli_WFDC2	BBX-E
1.10137e-87	-1.03383	0.228	0.482	1.5254e-84	preGC_IIa	MKX-E
1.19221e-87	0.353319	0.803	0.476	1.65121e-84	Sertoli	SOX18-E
1.21989e-87	-0.692461	0.206	0.495	1.68954e-84	sPAX8m	ZNF121-E
1.35125e-87	0.619758	0.744	0.481	1.87148e-84	preGC_IIb	STAT6-A
1.78235e-87	-0.746674	0.249	0.527	2.46855e-84	ovarianSurf	ZNF536-E
1.78978e-87	-0.924365	0.183	0.485	2.47884e-84	FetalLeydig-like	ZIC1-E
1.79035e-87	1.12844	0.609	0.377	2.47964e-84	coelEpi	FOXD3-D
1.86812e-87	0.473961	0.785	0.465	2.58735e-84	sKITLG	TFAM-E
1.91224e-87	-0.71449	0.23	0.491	2.64845e-84	sPAX8m	HOXD9-E
2.54016e-87	-0.72143	0.216	0.49	3.51813e-84	sPAX8m	PROX2-E
2.62324e-87	-0.636426	0.222	0.51	3.63318e-84	sPAX8m	ZNF664-E
3.54062e-87	-0.78177	0.24	0.477	4.90376e-84	coelEpi	ZNF69-E
4.04548e-87	0.76201	0.709	0.457	5.603e-84	granulosa	SALL2-E
4.54223e-87	0.641737	0.709	0.466	6.29099e-84	preGC_IIb	TGIF1-E
4.59645e-87	1.0531	0.746	0.495	6.36608e-84	FetalLeydig-like	FOXN3-E
4.69286e-87	-0.620216	0.269	0.535	6.4996e-84	granulosa	SCRT1-E
4.77548e-87	-0.887848	0.196	0.498	6.61404e-84	FetalLeydig-like	EN1-E
4.99991e-87	-0.685203	0.215	0.492	6.92487e-84	FetalLeydig-like	ZNF561-E
6.29774e-87	-0.612748	0.213	0.486	8.72236e-84	sPAX8m	KDM5C-E
6.33421e-87	0.53351	0.745	0.457	8.77288e-84	sKITLG	ZNF3-E
6.51289e-87	-0.854923	0.218	0.469	9.02035e-84	coelEpi	ZNF808-E
6.71468e-87	-1.07587	0.211	0.474	9.29984e-84	preGC_IIa	TBX2-E
7.07981e-87	-0.642403	0.261	0.516	9.80553e-84	sLGR5_female	IRX1-E
7.81641e-87	1.01049	0.665	0.456	1.08257e-83	coelEpi	PKNOX2-E
8.42607e-87	-1.05632	0.148	0.472	1.16701e-83	FetalLeydig-like	TET1-E
9.39472e-87	-0.37515	0.189	0.473	1.30117e-83	FetalLeydig-like	ZNF785-E
9.51623e-87	-0.980871	0.222	0.483	1.318e-83	sKITLG	MKX-E
1.01117e-86	0.491281	0.769	0.5	1.40046e-83	sPAX8m	NKX6-2-E
1.06475e-86	-1.24427	0.115	0.472	1.47468e-83	FetalLeydig-like	NPAS1-E
1.30709e-86	-0.668308	0.26	0.512	1.81032e-83	Sertoli	USF1-AA
1.67302e-86	-0.891429	0.207	0.476	2.31714e-83	Sertoli	ZNF497-E
1.74758e-86	0.426809	0.788	0.517	2.42039e-83	preGC_IIa	SSRP1-C
1.92362e-86	0.469632	0.792	0.504	2.66422e-83	sPAX8m	ETV3-E
2.17887e-86	-0.558688	0.213	0.501	3.01774e-83	sPAX8m	BBX-E
2.32856e-86	0.820332	0.69	0.433	3.22505e-83	preGC_IIb	SMAD2-B
2.5253e-86	-0.72484	0.226	0.498	3.49754e-83	sPAX8m	ZNF614-E
3.04644e-86	0.768667	0.691	0.451	4.21933e-83	Sertoli_WFDC2	EVX2-E
3.87654e-86	-1.00083	0.207	0.485	5.369e-83	sKITLG	ID4-E
4.02101e-86	-0.701626	0.221	0.511	5.5691e-83	Sertoli	THAP2-E
4.51959e-86	-0.704939	0.237	0.529	6.25963e-83	FetalLeydig-like	GATAD1-C
4.74009e-86	-0.650948	0.222	0.506	6.56503e-83	FetalLeydig-like	NONO-C
4.93107e-86	0.954481	0.682	0.453	6.82953e-83	granulosa	ZNF462-E
5.15858e-86	0.935217	0.785	0.487	7.14464e-83	FetalLeydig-like	SOX17-B
5.27394e-86	0.579232	0.722	0.45	7.30441e-83	granulosa	TRERF1-E
5.3525e-86	0.61599	0.703	0.447	7.41322e-83	Sertoli_WFDC2	HIVEP1-E
5.36663e-86	0.455984	0.796	0.509	7.43278e-83	sPAX8m	PRDM5-E
5.68546e-86	-0.795431	0.193	0.481	7.87436e-83	FetalLeydig-like	VAX1-E
5.68546e-86	-0.795431	0.193	0.481	7.87436e-83	FetalLeydig-like	VAX2-E
5.95645e-86	0.394432	0.757	0.464	8.24968e-83	preGC_IIc	RFX5-AA
6.30899e-86	0.542244	0.689	0.412	8.73795e-83	sPAX8m	FOSL2-A
6.61533e-86	0.484056	0.784	0.489	9.16223e-83	sPAX8m	NR2C1-E
8.88136e-86	-0.586543	0.214	0.504	1.23007e-82	sPAX8m	ZNF558-E
9.35118e-86	-0.566309	0.207	0.501	1.29514e-82	FetalLeydig-like	SNAI3-E
1.01296e-85	0.672973	0.695	0.496	1.40295e-82	Sertoli_WFDC2	ETV2-E
1.11182e-85	-0.624707	0.227	0.519	1.53987e-82	sPAX8m	ZC3H6-E
1.13589e-85	-0.823203	0.212	0.492	1.57321e-82	sPAX8m	ZBTB21-E
1.14483e-85	-0.47623	0.226	0.485	1.58558e-82	FetalLeydig-like	ZNF341-E
1.2074e-85	-0.710991	0.246	0.498	1.67224e-82	Sertoli	E2F5-C
1.22836e-85	0.493084	0.771	0.481	1.70127e-82	sPAX8e	NEUROD6-E
1.24802e-85	-0.696814	0.279	0.514	1.72851e-82	sKITLG	FOXA3-E
1.31485e-85	-1.15468	0.211	0.474	1.82107e-82	Sertoli_WFDC2	PRDM8-E
1.33239e-85	-1.03181	0.165	0.48	1.84536e-82	FetalLeydig-like	ZNF487-E
1.58011e-85	-0.053128	0.213	0.476	2.18845e-82	FetalLeydig-like	TSC22D2-E
1.65315e-85	-0.779237	0.257	0.49	2.28961e-82	sKITLG	HNF4G-C
1.66722e-85	0.438757	0.786	0.518	2.3091e-82	preGC_IIb	SSRP1-C
1.70855e-85	-0.662984	0.238	0.481	2.36635e-82	ovarianSurf	SNAI2-B
1.73835e-85	-0.29314	0.209	0.482	2.40761e-82	FetalLeydig-like	DMAP1-E
1.80596e-85	-0.661027	0.218	0.509	2.50125e-82	Sertoli	KAT8-E
1.99521e-85	-0.70131	0.207	0.486	2.76337e-82	sPAX8m	ZNF623-E
2.06581e-85	-0.695391	0.21	0.495	2.86115e-82	sPAX8m	ZBTB25-E
2.07304e-85	-0.44265	0.232	0.499	2.87117e-82	sPAX8m	KLF8-E
2.15708e-85	-0.403873	0.233	0.486	2.98756e-82	sPAX8m	MLXIP-E
2.50295e-85	0.728051	0.688	0.458	3.46659e-82	Sertoli_WFDC2	NKX3-2-E
2.77328e-85	-0.945255	0.195	0.483	3.84099e-82	Sertoli	ZNF296-E
2.86268e-85	-0.668374	0.267	0.562	3.96481e-82	sPAX8e	THAP4-E
2.88137e-85	-0.484807	0.215	0.497	3.9907e-82	sPAX8m	KAT6B-E
3.34941e-85	-0.600939	0.255	0.509	4.63894e-82	sPAX8m	ZNF197-D
3.6354e-85	0.496219	0.744	0.443	5.03503e-82	preGC_IIb	PITX2-D
4.93841e-85	0.436652	0.775	0.487	6.8397e-82	Sertoli	FOXN4-E
5.21934e-85	-0.732502	0.202	0.505	7.22879e-82	FetalLeydig-like	ZNF483-E
5.64068e-85	-1.1561	0.141	0.467	7.81234e-82	FetalLeydig-like	ZNF681-E
5.89806e-85	-0.569674	0.178	0.48	8.16881e-82	FetalLeydig-like	TEAD4-C
6.16223e-85	-1.15178	0.197	0.47	8.53469e-82	preGC_IIa	OSR2-E
6.70686e-85	0.376327	0.829	0.539	9.289e-82	preGC_IIb	ESR2-A
7.32068e-85	-0.50074	0.239	0.484	1.01391e-81	FetalLeydig-like	MTF1-E
8.97039e-85	-0.926456	0.224	0.491	1.2424e-81	Sertoli_WFDC2	NPAS3-E
9.38225e-85	-0.6137	0.206	0.476	1.29944e-81	sPAX8m	ZBTB34-E
9.75916e-85	-1.00809	0.154	0.469	1.35164e-81	FetalLeydig-like	ZNF713-E
1.1114e-84	0.45424	0.776	0.475	1.53929e-81	Sertoli	SIX6-E
1.30913e-84	-0.805685	0.231	0.501	1.81314e-81	Sertoli	TFAP2A-AA
1.36739e-84	-0.603792	0.282	0.552	1.89384e-81	coelEpi	CEBPD-A
1.4642e-84	-0.37718	0.235	0.492	2.02791e-81	FetalLeydig-like	LRRFIP2-E
1.57631e-84	-0.700794	0.2	0.487	2.18319e-81	sPAX8m	ZFP62-E
1.63822e-84	-0.712888	0.202	0.478	2.26894e-81	FetalLeydig-like	NFE2L3-E
2.09816e-84	-0.61328	0.23	0.495	2.90596e-81	FetalLeydig-like	SP8-E
2.397e-84	-0.675541	0.235	0.497	3.31984e-81	sPAX8m	FOXD1-E
2.47276e-84	-0.78522	0.205	0.487	3.42477e-81	Sertoli	ZSCAN26-E
2.60469e-84	0.586427	0.707	0.45	3.6075e-81	preGC_IIb	NR4A3-B
2.6713e-84	0.401069	0.817	0.531	3.69975e-81	preGC_IIb	ZNF581-E
2.67729e-84	0.683029	0.699	0.455	3.70804e-81	Sertoli_WFDC2	ELF1-C
2.72782e-84	0.607399	0.73	0.452	3.77803e-81	granulosa	EMX2-E
2.87927e-84	0.807939	0.679	0.444	3.98779e-81	coelEpi	NFIB-E
2.97625e-84	1.04461	0.673	0.456	4.1221e-81	granulosa	PBX3-C
3.13378e-84	0.890617	0.688	0.447	4.34028e-81	granulosa	PDX1-C
3.48634e-84	-1.01966	0.235	0.49	4.82858e-81	preGC_IIa	JDP2-E
4.15341e-84	-0.636944	0.226	0.508	5.75247e-81	sPAX8m	ZNF770-E
4.32169e-84	-0.956905	0.228	0.506	5.98554e-81	Sertoli_WFDC2	RFX5-AA
4.65624e-84	-0.95573	0.161	0.475	6.4489e-81	FetalLeydig-like	PDX1-C
4.74231e-84	0.445765	0.771	0.474	6.5681e-81	sKITLG	TOX4-E
5.72142e-84	0.575913	0.73	0.465	7.92416e-81	preGC_IIb	JUNB-C
6.15484e-84	-0.789172	0.183	0.491	8.52445e-81	FetalLeydig-like	ZNF781-E
6.54705e-84	0.62185	0.7	0.453	9.06767e-81	Sertoli_WFDC2	ZBTB7C-E
6.65494e-84	-0.629533	0.248	0.483	9.2171e-81	FetalLeydig-like	CIC-E
6.92494e-84	0.554435	0.754	0.454	9.59104e-81	sKITLG	ZNF286A-E
7.26901e-84	-0.320554	0.209	0.487	1.00676e-80	FetalLeydig-like	ZNF3-E
7.29667e-84	-0.846245	0.23	0.476	1.01059e-80	coelEpi	ZNF81-E
7.61763e-84	-0.483574	0.304	0.531	1.05504e-80	Sertoli_WFDC2	THAP11-C
8.31011e-84	-0.684801	0.213	0.503	1.15095e-80	FetalLeydig-like	CRX-E
9.06628e-84	0.717645	0.662	0.462	1.25568e-80	Sertoli_WFDC2	PBRM1-E
1.00387e-83	0.393352	0.785	0.505	1.39035e-80	sPAX8m	ETV7-E
1.14418e-83	-0.661375	0.217	0.479	1.58469e-80	sPAX8m	ZNF430-E
1.49787e-83	0.662282	0.701	0.469	2.07455e-80	preGC_IIb	MYNN-D
1.55025e-83	-0.652592	0.3	0.542	2.1471e-80	preGC_IIb	ZBTB7A-C
1.62349e-83	-0.333767	0.218	0.495	2.24854e-80	sPAX8m	ZNF276-E
1.69886e-83	-0.887823	0.194	0.477	2.35292e-80	sPAX8m	ZNF35-E
1.73465e-83	-0.69224	0.274	0.546	2.40248e-80	preGC_IIb	ARID5A-E
1.88463e-83	0.641492	0.717	0.467	2.61022e-80	preGC_IIb	BCL3-C
2.00109e-83	1.44589	0.569	0.442	2.77151e-80	coelEpi	HNF1A-AA
2.10766e-83	-0.722242	0.204	0.483	2.9191e-80	sPAX8m	ZNF138-E
2.15941e-83	0.744746	0.707	0.465	2.99079e-80	Sertoli_WFDC2	ISL1-E
2.38841e-83	-0.49821	0.322	0.532	3.30795e-80	Sertoli_WFDC2	LRRFIP1-E
2.99645e-83	-0.755052	0.248	0.503	4.15008e-80	coelEpi	ZNF644-D
3.50697e-83	-0.73851	0.212	0.489	4.85716e-80	sPAX8m	ZNF567-E
3.55672e-83	-1.02581	0.161	0.479	4.92606e-80	FetalLeydig-like	SIX4-E
3.68138e-83	0.551304	0.773	0.468	5.09871e-80	Sertoli	RBPJ-B
3.89326e-83	-0.727375	0.212	0.48	5.39216e-80	sPAX8m	ZNF573-E
4.31981e-83	-0.711581	0.217	0.494	5.98294e-80	sPAX8m	ZBTB6-E
4.40003e-83	-0.896035	0.172	0.466	6.09404e-80	FetalLeydig-like	ZNF765-E
4.62893e-83	-1.11123	0.124	0.467	6.41107e-80	FetalLeydig-like	ZNF879-E
4.83935e-83	-0.914676	0.18	0.485	6.70251e-80	FetalLeydig-like	HOXB5-E
4.91293e-83	-0.693223	0.274	0.524	6.8044e-80	Sertoli_WFDC2	TCF15-E
4.93368e-83	0.482134	0.761	0.453	6.83315e-80	sKITLG	ZNF131-E
4.93951e-83	-0.9051	0.222	0.477	6.84122e-80	coelEpi	ZBTB37-E
4.98992e-83	-0.880394	0.167	0.486	6.91104e-80	FetalLeydig-like	ZNF670-E
5.008e-83	-0.676547	0.246	0.506	6.93608e-80	Sertoli	FOXK1-D
5.31964e-83	-0.763892	0.245	0.492	7.3677e-80	coelEpi	ZNF814-E
5.78829e-83	0.693675	0.713	0.482	8.01679e-80	preGC_IIa	ARNT-A
6.68434e-83	0.603907	0.714	0.489	9.25782e-80	preGC_IIb	ZFPM1-E
6.99175e-83	0.606269	0.726	0.472	9.68357e-80	Sertoli_WFDC2	RBPJ-B
7.27015e-83	0.457075	0.774	0.508	1.00692e-79	Sertoli	ZBTB7B-E
7.90657e-83	-0.69105	0.232	0.5	1.09506e-79	sPAX8m	ATF7-C
8.28934e-83	-0.748016	0.264	0.539	1.14807e-79	granulosa	ZNF16-E
8.41874e-83	0.411334	0.798	0.507	1.166e-79	sKITLG	DNAJC1-E
8.72244e-83	0.186781	0.768	0.407	1.20806e-79	granulosa	BNC2-E
8.73715e-83	-0.732912	0.238	0.53	1.21009e-79	granulosa	ATF2-AA
8.87484e-83	-0.859502	0.202	0.483	1.22917e-79	FetalLeydig-like	ZNF549-E
1.0446e-82	-0.841909	0.211	0.477	1.44677e-79	Sertoli	ZSCAN16-E
1.08137e-82	-0.780556	0.199	0.492	1.4977e-79	Sertoli	ZNF768-E
1.1227e-82	-0.644959	0.271	0.503	1.55494e-79	coelEpi	TCF3-B
1.14269e-82	-1.0329	0.159	0.485	1.58263e-79	FetalLeydig-like	ONECUT1-C
1.14579e-82	-0.554231	0.213	0.48	1.58692e-79	sPAX8m	ZNF641-E
1.17335e-82	-0.803887	0.231	0.493	1.62509e-79	coelEpi	ZNF605-E
1.25565e-82	-0.665561	0.263	0.505	1.73908e-79	Sertoli_WFDC2	VENTX-E
1.3082e-82	-0.731977	0.207	0.493	1.81186e-79	FetalLeydig-like	ZSCAN31-E
1.5137e-82	-0.316895	0.22	0.49	2.09647e-79	FetalLeydig-like	BHLHA15-E
1.74756e-82	-0.50544	0.318	0.55	2.42037e-79	granulosa	NCOR1-C
1.75417e-82	-0.722599	0.245	0.5	2.42953e-79	sPAX8m	DLX1-E
1.77079e-82	-0.597339	0.196	0.498	2.45254e-79	Sertoli	ZNF286A-E
2.14173e-82	-0.785541	0.204	0.47	2.9663e-79	sPAX8m	ZKSCAN5-E
2.1481e-82	-0.129781	0.241	0.496	2.97512e-79	FetalLeydig-like	KAT8-E
2.47558e-82	-0.740697	0.261	0.504	3.42867e-79	Sertoli	TFDP1-B
2.74869e-82	-0.601672	0.223	0.492	3.80694e-79	sPAX8m	ZSCAN22-E
3.15299e-82	-0.780269	0.244	0.498	4.36689e-79	Sertoli	KLF1-C
3.53025e-82	0.51195	0.742	0.47	4.8894e-79	sKITLG	THAP2-E
3.59297e-82	-0.692137	0.215	0.501	4.97626e-79	sPAX8m	ZNF84-E
3.93274e-82	-0.685756	0.24	0.499	5.44685e-79	sPAX8m	GBX2-E
4.34732e-82	-0.593387	0.289	0.562	6.02104e-79	preGC_IIb	ID3-C
4.68043e-82	0.359726	0.81	0.517	6.4824e-79	Sertoli	TCF23-E
4.79696e-82	-0.706025	0.217	0.48	6.6438e-79	Sertoli	ZNF480-E
4.86788e-82	-0.164707	0.23	0.494	6.74202e-79	FetalLeydig-like	ZBTB48-E
4.95064e-82	0.579201	0.71	0.465	6.85664e-79	sPAX8e	SP3-AA
5.84439e-82	0.543319	0.735	0.449	8.09448e-79	sKITLG	ZNF7-E
5.99568e-82	0.523854	0.73	0.454	8.30402e-79	Sertoli_WFDC2	ONECUT1-C
6.81663e-82	-1.01796	0.122	0.475	9.44103e-79	FetalLeydig-like	GATA2-AA
6.87326e-82	0.719846	0.655	0.468	9.51946e-79	Sertoli_WFDC2	TFDP2-E
7.59076e-82	-0.686344	0.221	0.488	1.05132e-78	sPAX8m	ZBTB39-E
8.23041e-82	-1.17147	0.192	0.465	1.13991e-78	preGC_IIa	ZFPM2-E
8.573e-82	-0.664314	0.217	0.483	1.18736e-78	FetalLeydig-like	ZBED3-E
9.20981e-82	-0.785932	0.174	0.486	1.27556e-78	FetalLeydig-like	ZNF143-C
9.24e-82	-0.8379	0.261	0.614	1.27974e-78	FetalLeydig-like	NR1D2-B
9.33769e-82	0.894375	0.761	0.517	1.29327e-78	FetalLeydig-like	RERE-E
1.04166e-81	0.735857	0.695	0.456	1.4427e-78	Sertoli_WFDC2	MNX1-E
1.1329e-81	-0.762499	0.246	0.494	1.56906e-78	sPAX8e	ZNF219-E
1.19799e-81	-0.785762	0.222	0.489	1.65922e-78	FetalLeydig-like	ZFX-C
1.23303e-81	-0.610224	0.302	0.546	1.70774e-78	granulosa	ZEB2-C
1.52631e-81	-1.00536	0.148	0.479	2.11394e-78	FetalLeydig-like	ZNF610-E
1.55586e-81	-0.709356	0.227	0.497	2.15486e-78	sPAX8e	WIZ-E
1.56247e-81	-0.686356	0.205	0.488	2.16402e-78	sPAX8m	HDX-E
1.62175e-81	-0.669996	0.268	0.558	2.24612e-78	sPAX8e	SSRP1-C
1.79463e-81	-0.438718	0.27	0.516	2.48556e-78	Sertoli_WFDC2	SMAD4-AA
1.88326e-81	0.820732	0.691	0.456	2.60832e-78	granulosa	CEBPG-C
1.92298e-81	-0.681773	0.238	0.504	2.66332e-78	sPAX8e	ST18-E
2.01772e-81	-0.640862	0.228	0.491	2.79454e-78	sPAX8e	ZBTB42-E
2.09893e-81	0.671953	0.711	0.464	2.90702e-78	sLGR5_female	ZNF433-E
2.35779e-81	-0.855198	0.176	0.474	3.26554e-78	FetalLeydig-like	ZNF597-E
2.91387e-81	-0.605174	0.231	0.491	4.03572e-78	sPAX8m	ZNF324-E
2.9707e-81	-0.629702	0.23	0.507	4.11442e-78	FetalLeydig-like	ZC3H6-E
3.32784e-81	0.904419	0.765	0.501	4.60905e-78	FetalLeydig-like	ZBTB32-E
3.62688e-81	-0.535984	0.241	0.493	5.02323e-78	sPAX8m	OLIG3-E
3.95953e-81	0.641278	0.727	0.469	5.48394e-78	granulosa	VENTX-E
4.15975e-81	-1.16725	0.191	0.464	5.76125e-78	preGC_IIa	TCF21-E
4.18822e-81	-0.861828	0.183	0.483	5.80068e-78	FetalLeydig-like	BHLHE23-E
4.32392e-81	-0.788395	0.197	0.471	5.98863e-78	sKITLG	FOXA2-B
4.35569e-81	0.784309	0.597	0.372	6.03264e-78	coelEpi	SOX10-A
4.55372e-81	-0.617045	0.211	0.477	6.30691e-78	FetalLeydig-like	ZBTB39-E
4.59845e-81	0.594498	0.711	0.477	6.36885e-78	preGC_IIb	DBP-E
4.70426e-81	-0.754252	0.218	0.485	6.51539e-78	Sertoli	ZNF526-E
5.07684e-81	-0.753668	0.265	0.494	7.03142e-78	sKITLG	TFAP4-C
5.27266e-81	-0.78228	0.216	0.484	7.30263e-78	Sertoli	ZNF232-E
5.68721e-81	0.642798	0.709	0.451	7.87678e-78	preGC_I	ZNF487-E
5.77649e-81	0.632093	0.711	0.468	8.00044e-78	preGC_IIb	EGR4-E
9.35033e-81	-0.548781	0.324	0.537	1.29502e-77	Sertoli_WFDC2	IRX4-E
9.38425e-81	0.797817	0.7	0.451	1.29972e-77	granulosa	TEAD4-C
9.80801e-81	-1.01616	0.207	0.453	1.35841e-77	preGC_IIc	GATA6-B
1.01041e-80	-0.301694	0.235	0.486	1.39942e-77	FetalLeydig-like	ZNF692-E
1.07688e-80	-0.837708	0.196	0.474	1.49148e-77	FetalLeydig-like	ZNF155-E
1.10604e-80	0.427472	0.784	0.496	1.53186e-77	sPAX8e	LRRFIP1-E
1.31186e-80	-0.9248	0.23	0.468	1.81693e-77	coelEpi	ZNF236-E
1.5297e-80	-0.248037	0.25	0.502	2.11864e-77	FetalLeydig-like	ZNF777-E
1.56305e-80	-0.712598	0.256	0.497	2.16482e-77	Sertoli_WFDC2	E2F5-C
1.93826e-80	-0.8504	0.154	0.54	2.68449e-77	FetalLeydig-like	ELK1-AA
2.10235e-80	-0.792241	0.198	0.481	2.91175e-77	FetalLeydig-like	ALX3-E
2.63229e-80	-0.986121	0.143	0.464	3.64572e-77	FetalLeydig-like	ZNF717-E
2.69696e-80	-0.717263	0.254	0.502	3.73529e-77	sPAX8e	ARNTL2-E
2.97553e-80	0.830198	0.813	0.491	4.12111e-77	FetalLeydig-like	SOX30-E
3.22527e-80	-0.666414	0.234	0.506	4.46699e-77	Sertoli	MYT1L-E
3.28333e-80	1.00562	0.665	0.458	4.54742e-77	coelEpi	HOXA3-E
4.13131e-80	-0.660209	0.237	0.473	5.72186e-77	FetalLeydig-like	ARID3B-E
4.29451e-80	-0.772027	0.215	0.484	5.9479e-77	Sertoli	ZNF214-E
5.08573e-80	-0.682454	0.239	0.511	7.04374e-77	sPAX8e	ZNF672-E
5.15946e-80	-0.486331	0.226	0.515	7.14585e-77	FetalLeydig-like	TBPL1-E
5.69201e-80	-0.818521	0.183	0.475	7.88343e-77	FetalLeydig-like	PHOX2A-E
6.21291e-80	-0.784616	0.245	0.507	8.60488e-77	sPAX8m	TFCP2L1-E
6.63269e-80	-0.842725	0.239	0.477	9.18628e-77	sKITLG	NPAS1-E
7.02902e-80	-0.745551	0.262	0.546	9.7352e-77	granulosa	SRF-A
7.52994e-80	0.611163	0.709	0.447	1.0429e-76	sLGR5_female	ZNF215-E
8.18619e-80	-0.676617	0.257	0.527	1.13379e-76	sPAX8e	ZNF511-E
8.90166e-80	-0.62703	0.247	0.506	1.23288e-76	sPAX8m	ESRRB-E
9.77245e-80	0.594405	0.714	0.479	1.35348e-76	preGC_IIb	ZNF394-E
1.03382e-79	-0.743651	0.245	0.505	1.43184e-76	sPAX8e	MYT1L-E
1.05247e-79	0.778747	0.83	0.527	1.45767e-76	FetalLeydig-like	MXD1-E
1.08843e-79	-0.686735	0.222	0.522	1.50748e-76	sPAX8m	CDC5L-E
1.10568e-79	-0.753304	0.202	0.511	1.53136e-76	FetalLeydig-like	ATF6-A
1.21731e-79	0.350563	0.825	0.519	1.68597e-76	sKITLG	NFKBIL1-E
1.28124e-79	-0.751288	0.237	0.548	1.77452e-76	preGC_IIb	ETV7-E
1.90729e-79	0.607485	0.718	0.488	2.6416e-76	sPAX8m	TBP-B
1.94406e-79	-1.15343	0.194	0.476	2.69252e-76	preGC_IIa	EBF2-E
2.37042e-79	-0.950907	0.154	0.472	3.28303e-76	FetalLeydig-like	ZNF607-E
2.40197e-79	0.696811	0.704	0.469	3.32673e-76	coelEpi	SP5-E
2.45418e-79	0.545891	0.732	0.501	3.39904e-76	coelEpi	BARX2-E
3.08727e-79	-0.671094	0.254	0.521	4.27587e-76	sPAX8e	NFKBIB-E
3.57782e-79	-0.60883	0.226	0.496	4.95528e-76	sPAX8m	ZNF341-E
3.96701e-79	-0.735205	0.254	0.507	5.49431e-76	sPAX8e	TSC22D4-D
4.423e-79	0.627889	0.705	0.468	6.12586e-76	sLGR5_female	SOX3-E
4.78599e-79	-0.671248	0.255	0.512	6.62859e-76	sPAX8m	NR3C2-D
4.80178e-79	0.557385	0.722	0.469	6.65046e-76	preGC_IIb	CREB3-C
4.9166e-79	-0.599478	0.194	0.475	6.80949e-76	sPAX8m	ZNF611-E
5.42477e-79	-0.71879	0.224	0.485	7.5133e-76	Sertoli	ZNF48-E
5.51984e-79	0.406757	0.78	0.484	7.64498e-76	Sertoli	TLX1-E
6.6449e-79	0.500537	0.753	0.525	9.20319e-76	ovarianSurf	NFKBIL1-E
7.13411e-79	-0.818212	0.22	0.481	9.88074e-76	sPAX8e	LHX2-C
7.43823e-79	1.05655	0.647	0.455	1.03019e-75	granulosa	ALX1-E
7.68914e-79	-0.702558	0.25	0.504	1.06495e-75	sPAX8m	SOX3-E
7.81618e-79	-1.08077	0.232	0.473	1.08254e-75	Sertoli_WFDC2	EBF2-E
8.13436e-79	-0.797906	0.174	0.477	1.12661e-75	FetalLeydig-like	ZNF404-E
8.3709e-79	0.611503	0.703	0.444	1.15937e-75	granulosa	FOXL1-E
8.56922e-79	-0.694818	0.224	0.474	1.18684e-75	FetalLeydig-like	SOX12-E
1.03691e-78	-0.795528	0.27	0.522	1.43613e-75	ovarianSurf	PPARA-AA
1.1193e-78	1.21009	0.667	0.452	1.55023e-75	granulosa	HDX-E
1.2865e-78	-0.721483	0.22	0.512	1.7818e-75	Sertoli	ZNF784-E
1.44315e-78	-0.633748	0.257	0.554	1.99877e-75	sPAX8e	SMAD7-B
1.76961e-78	-0.343666	0.226	0.482	2.45091e-75	FetalLeydig-like	ZNF121-E
1.89063e-78	-0.580507	0.17	0.469	2.61853e-75	FetalLeydig-like	LHX4-E
1.89789e-78	0.56521	0.727	0.455	2.62857e-75	preGC_IIb	FOXM1-B
2.22424e-78	-0.919256	0.201	0.468	3.08057e-75	granulosa	ZNF485-E
2.31627e-78	0.455386	0.773	0.481	3.20803e-75	sPAX8m	ZNF649-E
2.36451e-78	0.69482	0.822	0.518	3.27485e-75	FetalLeydig-like	ZEB2-C
2.64998e-78	-0.761099	0.222	0.498	3.67023e-75	sPAX8m	ZNF3-E
2.75554e-78	-0.917814	0.172	0.476	3.81642e-75	FetalLeydig-like	ZNF665-E
2.78554e-78	-0.770355	0.232	0.48	3.85797e-75	coelEpi	TP73-C
3.05171e-78	0.676271	0.697	0.465	4.22662e-75	granulosa	LMX1B-E
3.16278e-78	-0.218943	0.272	0.502	4.38044e-75	FetalLeydig-like	TFE3-E
3.22083e-78	-0.815013	0.18	0.477	4.46086e-75	FetalLeydig-like	ZNF419-E
3.51785e-78	-0.590939	0.213	0.494	4.87223e-75	sPAX8m	ZNF182-E
4.40827e-78	-1.04579	0.197	0.442	6.10545e-75	granulosa	NR5A1-AA
4.54532e-78	0.504328	0.689	0.402	6.29527e-75	sPAX8m	KLF10-D
4.79975e-78	-0.615493	0.207	0.51	6.64765e-75	Sertoli	TFAM-E
4.9284e-78	-0.893068	0.157	0.48	6.82583e-75	FetalLeydig-like	ZNF230-E
5.44937e-78	-0.435677	0.215	0.484	7.54738e-75	FetalLeydig-like	KLF15-E
5.71684e-78	0.824288	0.687	0.449	7.91782e-75	granulosa	PBX2-C
5.98265e-78	0.536999	0.729	0.498	8.28597e-75	Sertoli_WFDC2	HES2-E
6.58092e-78	-0.530682	0.193	0.484	9.11457e-75	FetalLeydig-like	ZBTB12-E
6.73076e-78	-0.904105	0.211	0.486	9.32211e-75	Sertoli	ZNF215-E
6.8761e-78	-0.693252	0.256	0.536	9.5234e-75	sKITLG	FOXJ1-E
6.8924e-78	-0.566111	0.316	0.548	9.54597e-75	preGC_IIb	MNT-C
7.23021e-78	-0.754108	0.242	0.5	1.00138e-74	sPAX8e	SRY-E
9.54849e-78	-0.548704	0.204	0.499	1.32247e-74	sPAX8m	ZNF280D-E
1.01069e-77	0.905316	0.774	0.501	1.3998e-74	FetalLeydig-like	HSF5-E
1.09908e-77	0.547532	0.741	0.481	1.52223e-74	sPAX8m	SOX18-E
1.25214e-77	0.424856	0.773	0.483	1.73422e-74	Sertoli	ZIC5-E
1.26485e-77	-0.778671	0.232	0.548	1.75181e-74	granulosa	ETV7-E
1.27525e-77	-0.832073	0.214	0.465	1.76623e-74	coelEpi	EOMES-C
1.32556e-77	-0.598066	0.283	0.534	1.8359e-74	sLGR5_female	HOXA10-B
1.36825e-77	-0.626531	0.212	0.486	1.89503e-74	sPAX8m	ZFP14-E
1.474e-77	-0.703126	0.157	0.488	2.04149e-74	FetalLeydig-like	ZNF286B-E
1.52024e-77	-0.57757	0.213	0.475	2.10553e-74	FetalLeydig-like	CSRNP2-E
1.58652e-77	-0.657493	0.297	0.547	2.19733e-74	granulosa	GTF3A-E
1.69586e-77	-0.731037	0.24	0.504	2.34876e-74	Sertoli_WFDC2	FOXO3-AA
1.78027e-77	-0.566974	0.253	0.502	2.46568e-74	sPAX8m	POU3F1-E
1.87637e-77	-0.712557	0.341	0.568	2.59877e-74	Sertoli	CREB5-A
2.02811e-77	-0.378837	0.332	0.523	2.80894e-74	coelEpi	HES4-E
2.03501e-77	-0.582571	0.226	0.519	2.81848e-74	sPAX8m	AEBP2-E
2.23765e-77	-0.833277	0.213	0.481	3.09914e-74	sPAX8m	ZNF195-E
2.46155e-77	0.527109	0.733	0.466	3.40925e-74	sLGR5_female	ZNF442-E
2.48567e-77	-0.693556	0.247	0.502	3.44265e-74	sPAX8e	KLF16-E
2.58962e-77	-0.823717	0.226	0.495	3.58662e-74	Sertoli	PURG-E
2.66633e-77	-0.661466	0.288	0.504	3.69287e-74	sKITLG	KLF6-B
2.78345e-77	-0.902619	0.219	0.479	3.85508e-74	Sertoli_WFDC2	CSRNP1-E
2.87307e-77	-0.67702	0.251	0.501	3.97921e-74	Sertoli	MXD4-E
2.96926e-77	-0.628964	0.248	0.497	4.11242e-74	sPAX8m	ZNF134-E
3.1009e-77	-1.05714	0.215	0.484	4.29475e-74	preGC_IIa	GLIS2-E
3.24059e-77	0.582448	0.659	0.434	4.48822e-74	Sertoli_WFDC2	FOXN2-E
3.4262e-77	-0.831333	0.154	0.482	4.74529e-74	FetalLeydig-like	ZNF552-E
3.73882e-77	0.495222	0.723	0.435	5.17826e-74	granulosa	ZBTB46-E
3.77723e-77	0.509475	0.735	0.497	5.23146e-74	preGC_IIa	ZEB1-B
3.84517e-77	0.505556	0.733	0.449	5.32556e-74	preGC_IIa	EPAS1-B
4.3375e-77	-0.822896	0.208	0.474	6.00743e-74	sPAX8m	TADA2A-E
4.57174e-77	-0.482594	0.226	0.49	6.33185e-74	sPAX8m	ZNF618-E
4.63928e-77	-0.943681	0.152	0.47	6.4254e-74	FetalLeydig-like	ZNF799-E
4.66628e-77	0.707482	0.69	0.438	6.4628e-74	preGC_I	STAT1-AA
4.73119e-77	-0.649647	0.281	0.549	6.55269e-74	sPAX8e	GTF3A-E
5.5533e-77	-0.882645	0.193	0.486	7.69132e-74	FetalLeydig-like	HMX3-E
5.57633e-77	-0.59435	0.246	0.503	7.72321e-74	sPAX8m	ZNFX1-E
6.29557e-77	-0.829088	0.22	0.492	8.71937e-74	FetalLeydig-like	RAX-E
6.3959e-77	-0.703875	0.252	0.543	8.85832e-74	sKITLG	IRX4-E
6.67587e-77	0.59993	0.705	0.467	9.24608e-74	granulosa	JUNB-C
6.96274e-77	-0.51941	0.239	0.495	9.64339e-74	FetalLeydig-like	MYT1L-E
8.00502e-77	0.89159	0.661	0.455	1.1087e-73	granulosa	ZBTB38-E
8.05404e-77	-0.579605	0.262	0.518	1.11549e-73	preGC_I	ARNT-A
9.20783e-77	-0.674047	0.24	0.502	1.27528e-73	sPAX8m	LRRFIP2-E
1.03428e-76	-0.636325	0.218	0.478	1.43247e-73	sPAX8m	ZSCAN25-E
1.11826e-76	0.409759	0.774	0.53	1.54878e-73	Sertoli_WFDC2	TBX18-E
1.31725e-76	-0.510424	0.25	0.505	1.82438e-73	FetalLeydig-like	POU6F1-E
1.37341e-76	-0.81746	0.049	0.341	1.90217e-73	Sertoli_WFDC2	MSC-B
1.41989e-76	0.495336	0.737	0.475	1.96655e-73	Sertoli	POU3F4-E
1.42585e-76	0.696718	0.693	0.444	1.9748e-73	ovarianSurf	ZNF296-E
1.52531e-76	0.628498	0.705	0.445	2.11256e-73	Sertoli	RELB-C
1.66666e-76	-0.483705	0.243	0.474	2.30832e-73	FetalLeydig-like	KDM5C-E
1.68251e-76	0.639917	0.67	0.45	2.33027e-73	Sertoli_WFDC2	ZXDB-E
1.7734e-76	0.679214	0.702	0.445	2.45616e-73	Sertoli_WFDC2	MAFF-C
1.77535e-76	-0.368542	0.241	0.497	2.45886e-73	FetalLeydig-like	TFAM-E
1.99765e-76	-0.743269	0.232	0.484	2.76675e-73	sPAX8m	ZBTB8B-E
2.07113e-76	-0.735996	0.22	0.488	2.86852e-73	FetalLeydig-like	TBX15-E
2.21977e-76	-0.840061	0.201	0.47	3.07437e-73	sPAX8m	ZNF808-E
2.22132e-76	-0.778091	0.264	0.519	3.07653e-73	preGC_IIc	SOX18-E
2.29093e-76	-1.09306	0.222	0.473	3.17294e-73	sLGR5_female	EBF2-E
2.34347e-76	-0.5995	0.163	0.464	3.2457e-73	FetalLeydig-like	FOXC2-E
2.36776e-76	-1.16205	0.21	0.456	3.27935e-73	preGC_IIb	HEYL-E
3.04272e-76	0.847942	0.778	0.51	4.21417e-73	FetalLeydig-like	RCOR2-E
3.35545e-76	-0.709634	0.244	0.502	4.6473e-73	Sertoli	ZNF628-E
3.38157e-76	-0.741405	0.263	0.504	4.68347e-73	coelEpi	ZKSCAN8-E
4.10772e-76	-0.665149	0.251	0.526	5.68919e-73	sPAX8e	ZNF414-E
4.374e-76	-0.678708	0.243	0.504	6.05799e-73	sPAX8m	ZNF766-D
4.43304e-76	0.436072	0.73	0.432	6.13976e-73	granulosa	FOXC2-E
4.51552e-76	-0.796626	0.189	0.492	6.25399e-73	FetalLeydig-like	GFI1B-C
5.00554e-76	0.643187	0.694	0.47	6.93267e-73	Sertoli_WFDC2	ZKSCAN8-E
5.02822e-76	-0.641921	0.233	0.494	6.96409e-73	sPAX8m	ZNF136-E
5.59975e-76	0.554833	0.734	0.494	7.75565e-73	granulosa	IRX6-E
5.77126e-76	-0.30605	0.261	0.489	7.9932e-73	FetalLeydig-like	ZNF335-E
5.87772e-76	-0.69554	0.251	0.499	8.14064e-73	sPAX8m	LBX1-E
6.37833e-76	-0.140044	0.238	0.493	8.83399e-73	sPAX8m	CIC-E
6.56306e-76	1.10857	0.669	0.449	9.08984e-73	granulosa	CSRNP3-E
6.57517e-76	-0.8051	0.223	0.5	9.10661e-73	sPAX8e	HIVEP2-E
6.60684e-76	-0.789236	0.245	0.48	9.15047e-73	sKITLG	EBF1-C
6.62252e-76	-0.635856	0.228	0.487	9.17219e-73	sPAX8m	NFE2L3-E
7.00368e-76	0.381149	0.791	0.525	9.7001e-73	sPAX8m	ZNF202-E
8.25075e-76	-0.651853	0.225	0.504	1.14273e-72	sPAX8m	ZNF337-E
9.2457e-76	0.560571	0.702	0.448	1.28053e-72	Sertoli_WFDC2	KDM5C-E
1.03648e-75	0.541672	0.719	0.458	1.43553e-72	preGC_IIb	E2F1-AA
1.04397e-75	-0.790586	0.141	0.49	1.4459e-72	FetalLeydig-like	GRHL2-C
1.05645e-75	-0.35391	0.237	0.479	1.46319e-72	FetalLeydig-like	ZNF687-E
1.10345e-75	-0.266699	0.22	0.474	1.52827e-72	FetalLeydig-like	ZNF689-E
1.12042e-75	-0.213283	0.241	0.487	1.55179e-72	FetalLeydig-like	CXXC1-E
1.12276e-75	0.607155	0.697	0.447	1.55502e-72	Sertoli_WFDC2	ZNF101-E
1.2069e-75	-0.622972	0.224	0.482	1.67155e-72	sPAX8m	ZNF699-E
1.26459e-75	-0.748155	0.225	0.505	1.75146e-72	sPAX8e	ZNFX1-E
1.43805e-75	0.436931	0.777	0.492	1.99171e-72	sPAX8m	ZNF224-E
1.45943e-75	-0.471458	0.229	0.49	2.0213e-72	sPAX8m	ZNF687-E
1.51897e-75	-0.679253	0.196	0.482	2.10377e-72	FetalLeydig-like	ZNF502-E
1.65896e-75	-0.690811	0.232	0.511	2.29766e-72	Sertoli	ZNF672-E
1.78228e-75	-0.545655	0.229	0.477	2.46845e-72	sPAX8m	ZNF710-E
1.93103e-75	-0.54834	0.282	0.515	2.67448e-72	Sertoli_WFDC2	SMAD3-AA
2.04552e-75	0.732981	0.685	0.477	2.83304e-72	ovarianSurf	CUX1-C
2.06335e-75	0.650428	0.704	0.443	2.85774e-72	Sertoli	TP73-C
2.13376e-75	-0.759594	0.141	0.519	2.95526e-72	FetalLeydig-like	IRF6-E
2.20885e-75	-1.05245	0.178	0.469	3.05926e-72	FetalLeydig-like	ZNF550-E
2.38852e-75	-0.194383	0.237	0.483	3.30809e-72	FetalLeydig-like	ZNF276-E
2.78727e-75	-0.537481	0.252	0.504	3.86038e-72	sPAX8m	SOX4-E
2.79546e-75	-0.409436	0.222	0.495	3.87171e-72	FetalLeydig-like	ZNF444-E
3.05347e-75	-1.00816	0.198	0.454	4.22906e-72	ovarianSurf	GATA6-B
3.418e-75	-0.496357	0.255	0.499	4.73394e-72	sPAX8m	EN2-E
3.51248e-75	0.53566	0.734	0.487	4.86479e-72	sPAX8m	SP6-E
4.20607e-75	-0.841048	0.198	0.498	5.8254e-72	FetalLeydig-like	TBX5-E
4.99179e-75	-0.483012	0.227	0.482	6.91363e-72	sPAX8m	ZNF785-E
5.16283e-75	0.512752	0.705	0.442	7.15052e-72	sKITLG	ZNF480-E
5.24835e-75	-0.86137	0.159	0.492	7.26896e-72	FetalLeydig-like	ZNF217-C
5.25788e-75	-0.738108	0.252	0.497	7.28217e-72	preGC_IIb	HOXB9-E
5.71502e-75	-0.75612	0.193	0.494	7.9153e-72	FetalLeydig-like	ZNF740-C
6.2139e-75	-0.392191	0.348	0.531	8.60625e-72	Sertoli_WFDC2	MYT1-E
6.78141e-75	-0.535727	0.233	0.521	9.39225e-72	Sertoli	CDC5L-E
6.88314e-75	-0.624518	0.237	0.502	9.53315e-72	sPAX8m	ZNF257-E
7.15826e-75	0.678795	0.652	0.448	9.9142e-72	Sertoli_WFDC2	ZNF699-E
8.26196e-75	0.431161	0.763	0.501	1.14428e-71	sPAX8e	GATAD2A-E
8.38725e-75	0.665069	0.865	0.466	1.16163e-71	FetalLeydig-like	HOXB9-E
9.14852e-75	-0.789656	0.229	0.479	1.26707e-71	sPAX8m	SOX11-C
1.04873e-74	-0.650405	0.25	0.506	1.45248e-71	sPAX8e	ELF4-E
1.13095e-74	-0.520538	0.252	0.499	1.56636e-71	FetalLeydig-like	DEAF1-D
1.28595e-74	-0.23524	0.224	0.483	1.78104e-71	FetalLeydig-like	ZNF282-E
1.31453e-74	0.525187	0.719	0.46	1.82063e-71	sKITLG	ZNF627-E
1.39442e-74	0.618631	0.709	0.49	1.93127e-71	sKITLG	MTA1-B
1.49458e-74	-0.882323	0.243	0.507	2.06999e-71	preGC_IIa	FOSL1-B
1.55389e-74	0.555574	0.705	0.451	2.15213e-71	preGC_I	TRERF1-E
1.58581e-74	-0.652911	0.284	0.528	2.19635e-71	sPAX8e	ETV2-E
1.62913e-74	-0.596879	0.225	0.496	2.25634e-71	sPAX8m	ZNF680-E
1.68105e-74	-0.629434	0.248	0.534	2.32825e-71	FetalLeydig-like	ZNF34-E
1.71197e-74	-0.792924	0.226	0.484	2.37108e-71	Sertoli	ZNF18-E
1.81995e-74	-0.772557	0.172	0.488	2.52064e-71	FetalLeydig-like	TFAP4-C
1.88258e-74	0.561026	0.71	0.49	2.60738e-71	preGC_IIb	ZNF579-E
1.93501e-74	-0.854332	0.266	0.498	2.67999e-71	Sertoli	PAX6-B
1.97542e-74	-0.488867	0.32	0.52	2.73596e-71	Sertoli_WFDC2	FEZF2-E
2.33847e-74	0.108978	0.803	0.41	3.23878e-71	granulosa	HEYL-E
2.42097e-74	-0.734269	0.235	0.573	3.35304e-71	sPAX8m	TBX18-E
2.68242e-74	-0.71289	0.225	0.494	3.71514e-71	sPAX8m	ZBTB12-E
2.8858e-74	0.938622	0.646	0.412	3.99684e-71	preGC_IIb	NPAS2-D
3.08621e-74	-0.690154	0.254	0.5	4.2744e-71	Sertoli	ZNF433-E
3.1693e-74	0.452095	0.756	0.486	4.38948e-71	sKITLG	ZFP42-E
3.44681e-74	0.544416	0.732	0.488	4.77384e-71	sPAX8e	SP6-E
3.44926e-74	-0.711716	0.225	0.491	4.77723e-71	Sertoli	ZBTB42-E
3.91111e-74	-0.694969	0.229	0.493	5.41689e-71	sPAX8m	ZNF605-E
4.15687e-74	-0.185348	0.246	0.495	5.75727e-71	FetalLeydig-like	ELF4-E
4.24093e-74	-1.09686	0.249	0.455	5.87368e-71	Sertoli_WFDC2	STAT2-B
4.27212e-74	0.812415	0.658	0.45	5.91688e-71	granulosa	HIVEP1-E
4.32647e-74	-0.800951	0.17	0.474	5.99216e-71	FetalLeydig-like	ZNF583-E
4.33728e-74	0.545745	0.689	0.467	6.00714e-71	Sertoli_WFDC2	KLF16-E
4.36069e-74	-0.642647	0.276	0.511	6.03956e-71	coelEpi	POU3F4-E
4.90253e-74	0.762831	0.687	0.42	6.79e-71	preGC_IIb	RBPJL-D
5.06393e-74	-0.864182	0.23	0.489	7.01355e-71	Sertoli_WFDC2	EPAS1-B
5.42902e-74	-0.543796	0.233	0.504	7.51919e-71	sPAX8m	ZNF410-E
5.48164e-74	-0.749915	0.261	0.493	7.59208e-71	coelEpi	HMX3-E
6.24538e-74	-0.567968	0.29	0.523	8.64985e-71	ovarianSurf	ZNF366-E
6.2999e-74	-0.662168	0.299	0.543	8.72536e-71	granulosa	PHF5A-E
6.74406e-74	-0.693493	0.245	0.502	9.34052e-71	Sertoli	ZSCAN31-E
7.13796e-74	-0.488927	0.33	0.622	9.88608e-71	preGC_I	REST-A
8.74013e-74	-0.825164	0.235	0.491	1.21051e-70	granulosa	ZNF239-E
9.10436e-74	0.560648	0.67	0.456	1.26095e-70	Sertoli_WFDC2	VEZF1-E
9.83591e-74	-0.645452	0.26	0.513	1.36227e-70	sPAX8e	TFE3-E
1.11528e-73	-0.609724	0.271	0.53	1.54466e-70	sPAX8e	ZNF358-E
1.12166e-73	0.574056	0.693	0.479	1.5535e-70	Sertoli_WFDC2	TFE3-E
1.1874e-73	-0.822928	0.211	0.451	1.64454e-70	preGC_IIb	POU2F2-B
1.65238e-73	-1.08777	0.225	0.456	2.28854e-70	sPAX8m	STAT2-B
1.7274e-73	-0.734322	0.238	0.492	2.39245e-70	sPAX8m	ZSCAN9-E
1.74888e-73	-0.774224	0.213	0.485	2.4222e-70	FetalLeydig-like	ZSCAN4-E
1.86703e-73	0.824557	0.676	0.479	2.58584e-70	ovarianSurf	NFKBIE-E
2.09258e-73	-0.662224	0.22	0.489	2.89822e-70	sPAX8m	ZNF317-E
2.1201e-73	0.435679	0.737	0.509	2.93633e-70	sPAX8m	HMBOX1-C
2.19065e-73	0.131423	0.794	0.462	3.03404e-70	Sertoli	NR1I3-D
2.67595e-73	-0.81949	0.216	0.475	3.70619e-70	sPAX8m	ZNF793-E
2.80198e-73	-0.487063	0.291	0.516	3.88074e-70	ovarianSurf	YBX3-E
3.38985e-73	-0.759785	0.238	0.478	4.69494e-70	coelEpi	ZNF445-E
3.55992e-73	0.96947	0.748	0.497	4.93049e-70	FetalLeydig-like	TLX1-E
3.65269e-73	0.951494	0.65	0.457	5.05897e-70	granulosa	VEZF1-E
3.77418e-73	0.419383	0.775	0.523	5.22724e-70	preGC_IIb	NFKBIL1-E
5.16834e-73	-0.448661	0.345	0.52	7.15815e-70	Sertoli_WFDC2	SMARCA5-E
5.19263e-73	0.663892	0.675	0.481	7.1918e-70	Sertoli_WFDC2	ZNF483-E
6.14432e-73	0.426902	0.74	0.481	8.50988e-70	preGC_IIa	FLI1-A
6.19211e-73	-0.60825	0.24	0.5	8.57607e-70	sPAX8m	ZBTB26-E
6.22397e-73	-0.649007	0.247	0.517	8.6202e-70	sPAX8m	ELF2-E
6.23652e-73	-0.64487	0.259	0.517	8.63758e-70	sPAX8e	ZNF513-E
7.61109e-73	-0.752322	0.202	0.476	1.05414e-69	Sertoli	ZNF35-E
8.14632e-73	-0.61638	0.291	0.529	1.12826e-69	sKITLG	IRX6-E
8.67586e-73	-0.350703	0.246	0.499	1.20161e-69	FetalLeydig-like	ZNF197-D
9.0222e-73	-0.602692	0.222	0.467	1.24958e-69	FetalLeydig-like	ZNF142-E
1.03887e-72	0.457584	0.724	0.462	1.43883e-69	sKITLG	ZNF761-E
1.07614e-72	0.455638	0.75	0.452	1.49045e-69	sKITLG	ZNF121-E
1.1655e-72	-0.668525	0.23	0.473	1.61422e-69	granulosa	SREBF2-A
1.1829e-72	-0.624035	0.233	0.482	1.63832e-69	sPAX8m	ZNF75D-E
1.18505e-72	-0.743331	0.255	0.472	1.64129e-69	coelEpi	ZNF681-E
1.27e-72	-0.707394	0.255	0.472	1.75895e-69	ovarianSurf	NR1H3-B
1.31492e-72	0.633549	0.668	0.455	1.82116e-69	Sertoli_WFDC2	ZNF407-E
1.34803e-72	-0.706674	0.258	0.475	1.86703e-69	ovarianSurf	NR1H2-B
1.38481e-72	-0.73219	0.282	0.495	1.91796e-69	ovarianSurf	HOXB9-E
1.49798e-72	-0.827665	0.234	0.474	2.07471e-69	coelEpi	ZNF675-E
1.56859e-72	-0.703081	0.22	0.487	2.17249e-69	FetalLeydig-like	ZNF846-E
1.63945e-72	-0.59614	0.263	0.489	2.27063e-69	sPAX8m	ELF1-C
1.67505e-72	-0.313954	0.254	0.512	2.31995e-69	FetalLeydig-like	PSPC1-E
1.76288e-72	-0.723842	0.254	0.489	2.44159e-69	coelEpi	MGA-E
1.95722e-72	-0.723141	0.238	0.492	2.71075e-69	sPAX8m	ZNF782-E
2.114e-72	-0.460103	0.239	0.486	2.92789e-69	FetalLeydig-like	ZFAT-E
2.44108e-72	-0.729837	0.227	0.492	3.38089e-69	sPAX8m	ZNF184-E
2.65368e-72	0.608067	0.693	0.447	3.67534e-69	coelEpi	PITX2-D
2.87489e-72	0.626007	0.68	0.453	3.98173e-69	Sertoli_WFDC2	POU4F3-E
3.05472e-72	-0.775767	0.174	0.466	4.23079e-69	FetalLeydig-like	ZNF70-E
3.24486e-72	-0.598951	0.235	0.484	4.49414e-69	sPAX8m	ZNF169-E
3.26381e-72	0.674973	0.675	0.398	4.52037e-69	Sertoli	FOXC1-D
3.59341e-72	-0.827385	0.204	0.48	4.97688e-69	FetalLeydig-like	HMX2-E
3.74569e-72	0.425845	0.75	0.495	5.18778e-69	sPAX8m	FOXN1-E
3.76238e-72	-0.764767	0.269	0.527	5.21089e-69	sKITLG	PBX4-E
4.00188e-72	0.506968	0.739	0.511	5.5426e-69	sPAX8m	ZEB2-C
4.13331e-72	-0.888872	0.171	0.609	5.72463e-69	sLGR5_male	REST-A
4.32591e-72	-0.64048	0.25	0.489	5.99139e-69	sPAX8m	ZNF329-E
4.35136e-72	-0.746662	0.271	0.491	6.02663e-69	Sertoli_WFDC2	NFKB1-AA
4.37396e-72	-0.722355	0.204	0.488	6.05793e-69	FetalLeydig-like	ZNF582-E
4.68928e-72	0.593805	0.715	0.511	6.49465e-69	coelEpi	GRHL3-E
4.94521e-72	-0.617222	0.297	0.519	6.84912e-69	ovarianSurf	HNF4A-AA
5.1584e-72	-0.58383	0.261	0.498	7.14438e-69	sPAX8m	BHLHA15-E
5.19477e-72	-0.742477	0.196	0.507	7.19476e-69	FetalLeydig-like	RARB-D
5.5418e-72	-0.625335	0.224	0.489	7.6754e-69	sPAX8m	ZNF780B-E
6.21804e-72	-0.722427	0.246	0.473	8.61198e-69	coelEpi	MAFB-C
6.35546e-72	-0.347318	0.239	0.511	8.80232e-69	FetalLeydig-like	THAP3-E
6.6971e-72	-0.734306	0.241	0.483	9.27548e-69	coelEpi	HIVEP1-E
6.74764e-72	-0.588556	0.226	0.497	9.34548e-69	FetalLeydig-like	ZNF563-E
7.35733e-72	-0.605101	0.258	0.474	1.01899e-68	coelEpi	ZNF107-E
7.51678e-72	-0.596927	0.222	0.492	1.04107e-68	FetalLeydig-like	HOXB4-E
7.92647e-72	0.580598	0.712	0.457	1.09782e-68	preGC_IIc	TBXT-C
8.37924e-72	-0.513912	0.316	0.544	1.16052e-68	Sertoli_WFDC2	ZNF85-E
8.9318e-72	0.709011	0.828	0.516	1.23705e-68	FetalLeydig-like	ID1-E
1.02918e-71	-0.808478	0.242	0.473	1.42541e-68	coelEpi	ZNF793-E
1.04318e-71	-0.189832	0.243	0.49	1.4448e-68	FetalLeydig-like	ZBTB22-E
1.16898e-71	0.503906	0.729	0.482	1.61904e-68	Sertoli_WFDC2	NR4A1-B
1.18063e-71	0.411934	0.737	0.489	1.63517e-68	sLGR5_female	ELF3-B
1.34134e-71	-0.63816	0.233	0.508	1.85776e-68	Sertoli	HOXA2-E
1.35617e-71	-0.840863	0.249	0.484	1.8783e-68	coelEpi	ZNF714-E
1.77491e-71	0.876353	0.665	0.44	2.45825e-68	ovarianSurf	STAT1-AA
2.58077e-71	-0.8315	0.241	0.486	3.57437e-68	sKITLG	ATOH8-E
2.70927e-71	0.582834	0.711	0.461	3.75234e-68	sPAX8e	HOXB9-E
2.81975e-71	0.508396	0.73	0.493	3.90535e-68	granulosa	HOPX-E
2.9702e-71	-0.673616	0.24	0.507	4.11372e-68	sPAX8m	MSX2-E
3.36724e-71	0.432618	0.74	0.452	4.66363e-68	sKITLG	ZSCAN5A-E
3.41639e-71	-0.653131	0.189	0.466	4.7317e-68	FetalLeydig-like	ZNF319-E
3.4639e-71	-1.05528	0.124	0.469	4.7975e-68	FetalLeydig-like	ZFP37-E
3.60058e-71	-0.739257	0.249	0.446	4.9868e-68	sLGR5_female	FOSL2-A
3.8769e-71	0.649939	0.687	0.463	5.36951e-68	granulosa	AR-AA
4.05782e-71	-0.827042	0.224	0.474	5.62008e-68	sPAX8m	NR1H3-B
4.25973e-71	0.487083	0.726	0.442	5.89973e-68	sKITLG	ZBTB24-E
4.56879e-71	-0.688644	0.246	0.495	6.32777e-68	sPAX8m	FOXQ1-E
4.78416e-71	-0.588129	0.263	0.499	6.62606e-68	Sertoli_WFDC2	MEF2C-B
4.84048e-71	0.830752	0.761	0.505	6.70406e-68	FetalLeydig-like	MXI1-C
5.57355e-71	-0.762512	0.26	0.485	7.71937e-68	sKITLG	ZNF92-D
5.76178e-71	0.76762	0.656	0.452	7.98006e-68	granulosa	NCOA2-C
5.84314e-71	-0.649411	0.228	0.497	8.09275e-68	sPAX8m	ZNF615-E
7.23264e-71	-0.646477	0.258	0.494	1.00172e-67	sPAX8m	NR2C2-B
7.42005e-71	-0.940417	0.17	0.466	1.02768e-67	FetalLeydig-like	ZNF555-E
7.67747e-71	-0.914194	0.159	0.47	1.06333e-67	FetalLeydig-like	ZBTB49-E
9.35474e-71	-0.531437	0.321	0.543	1.29563e-67	granulosa	BHLHE22-C
9.38533e-71	0.370264	0.772	0.496	1.29987e-67	sPAX8e	ZHX1-D
9.42182e-71	-0.929829	0.234	0.475	1.30492e-67	preGC_IIa	ZNF469-E
9.46081e-71	0.908577	0.657	0.454	1.31032e-67	granulosa	ALX4-E
9.50686e-71	-0.641798	0.248	0.489	1.3167e-67	sPAX8e	ZNF668-E
9.86169e-71	-0.723667	0.257	0.489	1.36584e-67	sPAX8m	EMX1-E
1.03424e-70	0.840325	0.671	0.453	1.43242e-67	granulosa	SIX4-E
1.09095e-70	-0.710934	0.246	0.521	1.51097e-67	sKITLG	BCL11B-E
1.12057e-70	-0.517551	0.24	0.489	1.55199e-67	sPAX8m	VEZF1-E
1.12462e-70	0.673108	0.839	0.464	1.55759e-67	FetalLeydig-like	CREM-B
1.12914e-70	-0.597779	0.248	0.491	1.56387e-67	sPAX8m	ZNF23-E
1.41604e-70	-0.654766	0.234	0.49	1.96122e-67	sPAX8m	TADA2B-E
1.51438e-70	0.513545	0.705	0.443	2.09742e-67	preGC_IIa	LHX2-C
1.58796e-70	0.192472	0.757	0.447	2.19933e-67	Sertoli_WFDC2	NPAS4-E
1.77707e-70	-0.489774	0.234	0.501	2.46125e-67	sPAX8m	ARID4A-E
1.94958e-70	0.54256	0.689	0.457	2.70017e-67	Sertoli_WFDC2	PRDM2-E
1.98711e-70	-0.785882	0.209	0.482	2.75215e-67	FetalLeydig-like	EMX1-E
2.00919e-70	-0.774717	0.225	0.497	2.78273e-67	preGC_IIb	CREM-B
2.1233e-70	-0.894613	0.183	0.491	2.94078e-67	FetalLeydig-like	GBX2-E
2.24893e-70	-0.606707	0.248	0.504	3.11477e-67	sPAX8m	ZNF449-E
2.29227e-70	0.479811	0.712	0.465	3.1748e-67	preGC_IIb	FOSB-D
2.47561e-70	0.488233	0.717	0.461	3.42871e-67	sPAX8m	DLX5-E
2.60833e-70	0.681497	0.652	0.476	3.61254e-67	Sertoli_WFDC2	ZNF664-E
2.65998e-70	-0.659872	0.247	0.506	3.68407e-67	sPAX8m	ZNF343-E
2.66722e-70	-0.647765	0.255	0.484	3.6941e-67	sPAX8m	ZNF718-E
2.90115e-70	-0.666304	0.238	0.497	4.01809e-67	sPAX8m	ZFAT-E
3.2709e-70	0.282042	0.771	0.462	4.5302e-67	preGC_I	HLX-E
3.33505e-70	0.403586	0.741	0.496	4.61904e-67	sPAX8e	MXI1-C
4.36621e-70	-0.663376	0.257	0.496	6.0472e-67	sPAX8m	HOXC12-E
4.54841e-70	-0.441466	0.257	0.506	6.29954e-67	FetalLeydig-like	ZNF575-E
4.55439e-70	-0.550403	0.227	0.511	6.30783e-67	Sertoli	THAP5-E
4.68131e-70	-0.676469	0.228	0.486	6.48361e-67	sPAX8m	ZSCAN30-E
4.95826e-70	0.932832	0.655	0.455	6.86719e-67	granulosa	ARID5B-E
6.03464e-70	-0.707656	0.24	0.511	8.35798e-67	Sertoli	GLI4-E
6.49327e-70	0.715544	0.677	0.465	8.99318e-67	granulosa	SIX3-E
6.61311e-70	-0.798668	0.185	0.499	9.15916e-67	FetalLeydig-like	LBX2-E
6.64852e-70	-0.420804	0.239	0.49	9.2082e-67	sPAX8m	GMEB2-E
8.56705e-70	0.460795	0.762	0.456	1.18654e-66	ovarianSurf	POU1F1-D
9.0005e-70	0.490266	0.672	0.448	1.24657e-66	ovarianSurf	SP140L-E
1.00334e-69	-0.453114	0.254	0.49	1.38962e-66	FetalLeydig-like	KLF14-E
1.02054e-69	0.458556	0.73	0.512	1.41345e-66	Sertoli	ELK1-AA
1.03484e-69	-0.617512	0.244	0.491	1.43326e-66	sPAX8m	PROP1-E
1.05951e-69	0.381989	0.752	0.461	1.46743e-66	granulosa	NFIX-E
1.0757e-69	-0.511466	0.236	0.507	1.48985e-66	sPAX8m	ZNF496-E
1.08229e-69	-0.600956	0.287	0.517	1.49898e-66	sPAX8m	NR4A1-B
1.23776e-69	-0.89303	0.157	0.472	1.71429e-66	FetalLeydig-like	ZNF443-E
1.30386e-69	0.4375	0.738	0.519	1.80584e-66	sPAX8m	NCOR2-C
1.31974e-69	0.44931	0.749	0.536	1.82784e-66	coelEpi	ZNF581-E
[truncated: 18,776 more rows]

## Sheet: 3_TFact_fromsnATAC_supporting
p_val	avg_log2FC	pct.1	pct.2	p_val_adj	cluster	TFmotif
0	2.79233	0.704	0.357	0	preGC-I	TEAD1.MA0090.2
0	2.74013	0.688	0.354	0	preGC-I	TEAD3.MA0808.1
0	2.43563	0.738	0.409	0	preGC-I	TFE2-HUMAN.H10MO.C
0	2.34809	0.698	0.351	0	preGC-I	TEAD2.MA1121.1
0	2.09549	0.862	0.343	0	preGC-I	FOXM1.HOMER
0	2.05539	0.848	0.342	0	preGC-I	FOXL2.HOMER
0	1.83123	0.87	0.337	0	preGC-I	FOXC1.MA0032.2
0	1.78237	0.692	0.405	0	preGC-I	TAL1-HUMAN.H10MO.S
0	1.75649	0.679	0.368	0	preGC-I	TEAD2.HOMER
0	1.7075	0.723	0.386	0	preGC-I	MYOD1-HUMAN.H10MO.C
0	1.7075	0.723	0.386	0	preGC-I	MYOD1.SwissRegulon
0	1.70696	0.762	0.389	0	preGC-I	TCF12.SwissRegulon
0	1.64723	0.644	0.393	0	preGC-I	TEAD1.SwissRegulon
0	1.60801	0.671	0.413	0	preGC-I	TEAD1-HUMAN.H10MO.D
0	1.55819	0.805	0.372	0	preGC-I	FOXO1.SwissRegulon
0	1.55493	0.71	0.378	0	preGC-I	RUNX3-HUMAN.H10MO.C
0	1.55272	0.701	0.402	0	preGC-I	DBP.SwissRegulon
0	1.55197	0.724	0.364	0	preGC-I	NHLH1.MA0048.2
0	1.5399	0.733	0.404	0	preGC-I	AHR.SwissRegulon
0	1.5399	0.733	0.404	0	preGC-I	ARNT2.SwissRegulon
0	1.52233	0.712	0.356	0	preGC-I	TEAD4.MA0809.1
0	1.47494	0.787	0.381	0	preGC-I	BRCA1-HUMAN.H10MO.D
0	1.47494	0.787	0.381	0	preGC-I	BRCA1.SwissRegulon
0	1.46226	0.768	0.379	0	preGC-I	TCF3.SwissRegulon
0	1.45572	0.841	0.351	0	preGC-I	FOXF2-HUMAN.H10MO.D
0	1.45264	0.784	0.372	0	preGC-I	FOXA2-HUMAN.H10MO.A
0	1.45113	0.705	0.391	0	preGC-I	RUNX1.SwissRegulon
0	1.42815	0.736	0.41	0	preGC-I	MSC.SwissRegulon
0	1.40615	0.693	0.381	0	preGC-I	NHLH1.SwissRegulon
0	1.39008	0.846	0.338	0	preGC-I	FOXA1.SwissRegulon
0	1.3849	0.781	0.383	0	preGC-I	MESP1.SwissRegulon
0	1.38059	0.707	0.386	0	preGC-I	BCL11A.SwissRegulon
0	1.37048	0.714	0.368	0	preGC-I	ASCL1.MA1100.1
0	1.3594	0.709	0.432	0	preGC-I	FIGLA.SwissRegulon
0	1.35842	0.699	0.353	0	preGC-I	MYF6-HUMAN.H10MO.C
0	1.34899	0.862	0.341	0	preGC-I	FOXB1.MA0845.1
0	1.3336	0.672	0.402	0	preGC-I	MYOG.SwissRegulon
0	1.32791	0.812	0.402	0	preGC-I	FOXD2.SwissRegulon
0	1.32463	0.696	0.355	0	preGC-I	TEAD3.SwissRegulon
0	1.31547	0.663	0.4	0	preGC-I	PTF1A-HUMAN.H10MO.C
0	1.30449	0.673	0.408	0	preGC-I	ASCL2.SwissRegulon
0	1.29104	0.69	0.422	0	preGC-I	TCF21.SwissRegulon
0	1.28128	0.707	0.394	0	preGC-I	FOXP1.HOMER
0	1.2633	0.707	0.407	0	preGC-I	TFAP4.SwissRegulon
0	1.25389	0.69	0.416	0	preGC-I	SCRT2.SwissRegulon
0	1.25387	0.677	0.404	0	preGC-I	STAT4.SwissRegulon
0	1.24289	0.735	0.423	0	preGC-I	E2F4.MA0470.1
0	1.23819	0.674	0.41	0	preGC-I	MYOG-HUMAN.H10MO.D
0	1.22598	0.771	0.378	0	preGC-I	SRY.SwissRegulon
0	1.22086	0.804	0.367	0	preGC-I	FOXI1.SwissRegulon
0	1.21895	0.688	0.406	0	preGC-I	ETV1-HUMAN.H10MO.B
0	1.21894	0.669	0.363	0	preGC-I	RUNX1-HUMAN.H10MO.A
0	1.20517	0.831	0.339	0	preGC-I	FOXA3-HUMAN.H10MO.C
0	1.19246	0.718	0.411	0	preGC-I	POU5F1.SwissRegulon
0	1.19237	0.753	0.379	0	preGC-I	FOXM1-HUMAN.H10MO.D
0	1.18672	0.788	0.382	0	preGC-I	FOXO6-HUMAN.H10MO.D
0	1.16753	0.701	0.434	0	preGC-I	HIF1A-HUMAN.H10MO.A
0	1.16696	0.695	0.433	0	preGC-I	HIF1A.SwissRegulon
0	1.15081	0.672	0.409	0	preGC-I	SIX2.MA1119.1
0	1.1463	0.635	0.417	0	preGC-I	ZN639-HUMAN.H10MO.D
0	1.14481	0.63	0.397	0	preGC-I	MYF6.SwissRegulon
0	1.14468	0.743	0.378	0	preGC-I	IRF2.SwissRegulon
0	1.14372	0.648	0.41	0	preGC-I	PTF1A.SwissRegulon
0	1.1388	0.707	0.43	0	preGC-I	NRF1.SwissRegulon
0	1.13037	0.715	0.397	0	preGC-I	RREB1-HUMAN.H10MO.D
0	1.13037	0.715	0.397	0	preGC-I	RREB1.SwissRegulon
0	1.11722	0.705	0.4	0	preGC-I	FOXK2.HOMER
0	1.11623	0.812	0.351	0	preGC-I	FOXO3-HUMAN.H10MO.B
0	1.11429	0.709	0.421	0	preGC-I	MBD2.SwissRegulon
0	1.11234	0.684	0.407	0	preGC-I	CHD1.SwissRegulon
0	1.08284	0.681	0.418	0	preGC-I	CLOCK.HOMER
0	1.07504	0.707	0.419	0	preGC-I	MBD2-HUMAN.H10MO.B
0	1.07207	0.643	0.383	0	preGC-I	PEBB-HUMAN.H10MO.C
0	1.06857	0.839	0.338	0	preGC-I	FOXA3.SwissRegulon
0	1.06542	0.742	0.431	0	preGC-I	NRF1.MA0506.1
0	1.0461	0.673	0.42	0	preGC-I	MYC.SwissRegulon
0	1.04591	0.7	0.415	0	preGC-I	NRF1-HUMAN.H10MO.A
0	1.04281	0.65	0.428	0	preGC-I	SIX1.MA1118.1
0	1.0354	0.641	0.378	0	preGC-I	CBFB.SwissRegulon
0	1.01968	0.729	0.419	0	preGC-I	SP4.SwissRegulon
0	1.01804	0.667	0.429	0	preGC-I	ZSCA4-HUMAN.H10MO.D
0	1.01216	0.731	0.419	0	preGC-I	AP2D-HUMAN.H10MO.D
0	1.01181	0.679	0.41	0	preGC-I	HSF2.SwissRegulon
0	1.00938	0.753	0.379	0	preGC-I	STAT2-HUMAN.H10MO.B
0	0.992454	0.734	0.38	0	preGC-I	MYF6.MA0667.1
0	0.987632	0.669	0.432	0	preGC-I	MYCN.SwissRegulon
0	0.984801	0.679	0.429	0	preGC-I	POU5F1.MA1115.1
0	0.984404	0.671	0.414	0	preGC-I	MAFF.MAFF.SwissRegulon
0	0.982503	0.721	0.401	0	preGC-I	IRF3-HUMAN.H10MO.C
0	0.978364	0.663	0.435	0	preGC-I	E2F6.HOMER
0	0.977946	0.672	0.416	0	preGC-I	RCOR1.SwissRegulon
0	0.962542	0.702	0.438	0	preGC-I	TFDP1.MA1122.1
0	0.956697	0.649	0.432	0	preGC-I	E2F4.SwissRegulon
0	0.952601	0.682	0.435	0	preGC-I	ZBTB14.SwissRegulon
0	0.949237	0.616	0.411	0	preGC-I	SPIB.MA0081.1
0	0.949154	0.683	0.409	0	preGC-I	FOXD1-HUMAN.H10MO.D
0	0.946846	0.651	0.434	0	preGC-I	SCRT2.MA0744.1
0	0.930723	0.621	0.409	0	preGC-I	RUNX2-HUMAN.H10MO.B
0	0.93061	0.638	0.415	0	preGC-I	MAZ.MAZ-HUMAN.H10MO.A
0	0.928177	0.64	0.429	0	preGC-I	RREB1.MA0073.1
0	0.924451	0.655	0.446	0	preGC-I	MYCN-HUMAN.H10MO.B
0	0.918585	0.634	0.421	0	preGC-I	MTF1.SwissRegulon
0	0.918414	0.655	0.439	0	preGC-I	CLOCK.MA0819.1
0	0.917551	0.635	0.413	0	preGC-I	TF7L2-HUMAN.H10MO.A
0	0.89554	0.661	0.449	0	preGC-I	E2F7.HOMER
0	0.894956	0.63	0.426	0	preGC-I	PML.SwissRegulon
0	0.894333	0.628	0.425	0	preGC-I	ZNF519.HOMER
0	0.889935	0.774	0.369	0	preGC-I	FOXF1-HUMAN.H10MO.D
0	0.881319	0.719	0.427	0	preGC-I	HIC1.SwissRegulon
0	0.87553	0.657	0.436	0	preGC-I	ZBTB7B.SwissRegulon
0	0.873999	0.654	0.424	0	preGC-I	SP4-HUMAN.H10MO.D
0	0.867648	0.731	0.388	0	preGC-I	FOXQ1.SwissRegulon
0	0.865088	0.76	0.378	0	preGC-I	FOXF2.SwissRegulon
0	0.86052	0.816	0.346	0	preGC-I	FOXC1.SwissRegulon
0	0.85907	0.658	0.413	0	preGC-I	CLOCK.SwissRegulon
0	0.858507	0.663	0.447	0	preGC-I	TBP.SwissRegulon
0	0.858002	0.668	0.449	0	preGC-I	NPAS.HOMER
0	0.850892	0.626	0.382	0	preGC-I	RUNX3.SwissRegulon
0	0.838067	0.693	0.419	0	preGC-I	ZFX-HUMAN.H10MO.C
0	0.831404	0.663	0.444	0	preGC-I	HINFP.MA0131.2
0	0.826097	0.659	0.435	0	preGC-I	MXI1.SwissRegulon
0	0.825868	0.694	0.371	0	preGC-I	TFAP4-HUMAN.H10MO.C
0	0.816656	0.818	0.354	0	preGC-I	FOXC2.SwissRegulon
0	0.80947	0.733	0.394	0	preGC-I	FOXQ1-HUMAN.H10MO.C
0	0.808041	0.73	0.399	0	preGC-I	IRF4.SwissRegulon
0	0.79425	0.776	0.382	0	preGC-I	SRY-HUMAN.H10MO.B
0	0.787162	0.658	0.393	0	preGC-I	RUNX2.MA0511.2
0	0.778793	0.698	0.413	0	preGC-I	FOXA1-HUMAN.H10MO.A
0	0.76735	0.662	0.396	0	preGC-I	HEB.HOMER
0	0.759249	0.867	0.336	0	preGC-I	FOXK2.MA1103.1
0	0.748859	0.716	0.393	0	preGC-I	ETV2-HUMAN.H10MO.D
0	0.745339	0.639	0.407	0	preGC-I	TFDP1-HUMAN.H10MO.D
0	0.743063	0.696	0.478	0	preGC-I	NDF1-HUMAN.H10MO.C
0	0.737447	0.815	0.352	0	preGC-I	FOXP1.SwissRegulon
0	0.727178	0.712	0.462	0	preGC-I	TFDP1.SwissRegulon
0	0.712827	0.68	0.415	0	preGC-I	IRF8.SwissRegulon
0	0.705536	0.804	0.355	0	preGC-I	FOXD3-HUMAN.H10MO.D
0	0.705536	0.804	0.355	0	preGC-I	FOXD3.SwissRegulon
0	0.686861	0.765	0.378	0	preGC-I	FOXF1.SwissRegulon
0	0.686497	0.69	0.415	0	preGC-I	MAFG.MA0659.1
0	0.683742	0.83	0.357	0	preGC-I	FOXJ2-HUMAN.H10MO.C
0	0.654381	0.694	0.403	0	preGC-I	IRF7.SwissRegulon
0	0.643891	0.675	0.416	0	preGC-I	FOXA2.SwissRegulon
0	0.643506	0.87	0.328	0	preGC-I	FOXC2.MA0846.1
0	0.625879	0.874	0.329	0	preGC-I	FOXA1.MA0148.3
0	0.625818	0.694	0.402	0	preGC-I	IRF7-HUMAN.H10MO.C
0	0.619772	0.71	0.4	0	preGC-I	IRF3.MA1418.1
0	0.619636	0.657	0.359	0	preGC-I	RUNX3.MA0684.1
0	0.590878	0.856	0.334	0	preGC-I	FOXI1.MA0042.2
0	0.590878	0.856	0.334	0	preGC-I	FOXL1.MA0033.2
0	0.590878	0.856	0.334	0	preGC-I	FOXD2.MA0847.1
0	0.590878	0.856	0.334	0	preGC-I	FOXO4.MA0848.1
0	0.590878	0.856	0.334	0	preGC-I	FOXO6.MA0849.1
0	0.590878	0.856	0.334	0	preGC-I	FOXP3.MA0850.1
0	0.590878	0.856	0.334	0	preGC-I	FOXO6.SwissRegulon
0	0.568654	0.824	0.353	0	preGC-I	FOXO4.SwissRegulon
0	0.546988	0.882	0.336	0	preGC-I	FOXA1.HOMER
0	0.542178	0.697	0.376	0	preGC-I	HTF4-HUMAN.H10MO.B
0	0.494973	0.672	0.414	0	preGC-I	IRF2-HUMAN.H10MO.C
0	0.49476	0.65	0.402	0	preGC-I	CUX1.SwissRegulon
0	0.477917	0.856	0.338	0	preGC-I	FOXP1.MA0481.2
0	0.464627	0.677	0.422	0	preGC-I	RUNX2.HOMER
0	0.425886	0.857	0.328	0	preGC-I	FOXK1.MA0852.2
0	0.418557	0.684	0.427	0	preGC-I	RUNX1.HOMER
0	0.401777	0.716	0.439	0	preGC-I	FIGLA.MA0820.1
0	0.291271	0.694	0.4	0	preGC-I	IRF2.MA0051.1
0	0.28805	0.838	0.351	0	preGC-I	FOXB1.SwissRegulon
0	0.245218	0.665	0.405	0	preGC-I	IRF5-HUMAN.H10MO.D
0	0.227018	0.81	0.343	0	preGC-I	FOXF2.MA0030.1
0	0.185655	0.654	0.428	0	preGC-I	ZSCAN4.MA1155.1
0	0.185137	0.756	0.38	0	preGC-I	FOXJ3-HUMAN.H10MO.S
0	0.141884	0.829	0.338	0	preGC-I	FOXD1.MA0031.1
0	0.141884	0.829	0.338	0	preGC-I	FOXD1.SwissRegulon
0	0.141884	0.829	0.338	0	preGC-I	FOXO3.SwissRegulon
0	0.124321	0.699	0.453	0	preGC-I	TWST1-HUMAN.H10MO.D
0	0.124321	0.699	0.453	0	preGC-I	TWIST1.SwissRegulon
0	0.11262	0.702	0.404	0	preGC-I	FOXA1:AR.HOMER
0	0.110943	0.81	0.346	0	preGC-I	FOXP2-HUMAN.H10MO.A
0	0.110028	0.238	0.49	0	preGC-I	JUN.SwissRegulon
0	0.0780876	0.694	0.387	0	preGC-I	FOXM1.SwissRegulon
0	0.0488342	0.861	0.328	0	preGC-I	FOXP2.MA0593.1
0	0.0401072	0.823	0.348	0	preGC-I	FOXP2.SwissRegulon
0	0.02536	0.751	0.409	0	preGC-I	BPTF.SwissRegulon
0	0.0125258	0.724	0.407	0	preGC-I	FUBP1.SwissRegulon
0	0.00510361	0.722	0.41	0	preGC-I	FUBP1-HUMAN.H10MO.D
0	-0.0564295	0.677	0.407	0	preGC-I	IRF7.MA0772.1
0	-0.0592676	0.806	0.355	0	preGC-I	FOXO4-HUMAN.H10MO.C
0	-0.0871285	0.731	0.41	0	preGC-I	BPTF-HUMAN.H10MO.D
0	-0.13443	0.852	0.338	0	preGC-I	FOXO3.MA0157.2
0	-0.16267	0.83	0.339	0	preGC-I	FOXG1.SwissRegulon
0	-0.16267	0.83	0.339	0	preGC-I	FOXK1.SwissRegulon
0	-0.16267	0.83	0.339	0	preGC-I	FOXP3.SwissRegulon
0	-0.188684	0.655	0.389	0	preGC-I	TEAD.HOMER
0	-0.381786	0.673	0.399	0	preGC-I	IRF1.HOMER
0	-0.4345	0.665	0.409	0	preGC-I	IRF1.SwissRegulon
0	-0.474206	0.665	0.388	0	preGC-I	STAT1::STAT2.MA0517.1
0	-0.482892	0.642	0.413	0	preGC-I	OLIG2.SwissRegulon
0	-0.577353	0.653	0.413	0	preGC-I	MAFK.MA0496.2
0	-0.604693	0.746	0.407	0	preGC-I	MSC.MA0665.1
0	-0.608743	0.664	0.431	0	preGC-I	MESP1-HUMAN.H10MO.D
0	-0.68255	0.685	0.413	0	preGC-I	NEUROD1.SwissRegulon
0	-0.765155	0.708	0.396	0	preGC-I	TFAP4.MA0691.1
0	-0.803858	0.828	0.339	0	preGC-I	FOXG1.MA0613.1
0	-0.931381	0.683	0.427	0	preGC-I	ZBTB18.SwissRegulon
0	-1.06952	0.289	0.519	0	preGC-I	PO4F3-HUMAN.H10MO.D
0	-1.08751	0.294	0.544	0	preGC-I	PO6F1-HUMAN.H10MO.D
0	-1.15736	0.27	0.532	0	preGC-I	LMX1A-HUMAN.H10MO.D
0	-1.17109	0.296	0.525	0	preGC-I	CREB5.SwissRegulon
0	-1.21513	0.292	0.532	0	preGC-I	NKX1-2.SwissRegulon
0	-1.22286	0.297	0.524	0	preGC-I	PPARG.MA0066.1
0	-1.25199	0.709	0.442	0	preGC-I	SNAI1.SwissRegulon
0	-1.32233	0.282	0.54	0	preGC-I	MSX1.SwissRegulon
0	-1.34063	0.284	0.508	0	preGC-I	JDP2-HUMAN.H10MO.D
0	-1.3667	0.303	0.54	0	preGC-I	KLF5.HOMER
0	-1.43269	0.258	0.55	0	preGC-I	MSX1-HUMAN.H10MO.D
0	-1.551	0.261	0.534	0	preGC-I	ZN333-HUMAN.H10MO.D
0	-1.551	0.261	0.534	0	preGC-I	ZNF333.SwissRegulon
0	-1.56519	0.683	0.401	0	preGC-I	TAL1.SwissRegulon
0	-1.71142	0.683	0.408	0	preGC-I	OLIG2-HUMAN.H10MO.D
0	-1.72741	0.288	0.509	0	preGC-I	RARA::RXRG.MA1149.1
0	-1.73111	0.252	0.532	0	preGC-I	CEBPD-HUMAN.H10MO.B
0	-1.79599	0.272	0.527	0	preGC-I	DLX5-HUMAN.H10MO.D
0	-1.89222	0.264	0.54	0	preGC-I	RAX.SwissRegulon
0	-1.89339	0.205	0.56	0	preGC-I	HOXB3.SwissRegulon
0	-1.90744	0.253	0.515	0	preGC-I	FXR.HOMER
0	-1.91284	0.28	0.502	0	preGC-I	FOS::JUN(var.2).MA1126.1
0	-1.97497	0.225	0.528	0	preGC-I	HMX1-HUMAN.H10MO.D
0	-2.01292	0.665	0.415	0	preGC-I	ZEB1.MA0103.3
0	-2.09552	0.252	0.527	0	preGC-I	PAX7-HUMAN.H10MO.D
0	-2.12984	0.239	0.527	0	preGC-I	ZFHX3-HUMAN.H10MO.D
0	-2.14141	0.247	0.535	0	preGC-I	HOXD1.SwissRegulon
0	-2.17908	0.24	0.546	0	preGC-I	EVX2.SwissRegulon
0	-2.18316	0.675	0.401	0	preGC-I	SCL.HOMER
0	-2.2172	0.252	0.528	0	preGC-I	GSX2-HUMAN.H10MO.D
0	-2.26089	0.281	0.513	0	preGC-I	CREB5-HUMAN.H10MO.D
0	-2.32647	0.269	0.518	0	preGC-I	PITX2-HUMAN.H10MO.D
0	-2.37034	0.25	0.504	0	preGC-I	DDIT3.SwissRegulon
0	-2.37635	0.268	0.52	0	preGC-I	PITX2.SwissRegulon
0	-2.3884	0.214	0.507	0	preGC-I	JUN.MA0488.1
0	-2.41566	0.635	0.419	0	preGC-I	OLIG3-HUMAN.H10MO.D
0	-2.427	0.203	0.532	0	preGC-I	MSX2-HUMAN.H10MO.D
0	-2.45787	0.262	0.514	0	preGC-I	NR1H4.MA1110.1
0	-2.50123	0.257	0.522	0	preGC-I	ALX4-HUMAN.H10MO.D
0	-2.56088	0.165	0.596	0	preGC-I	HOXA4.SwissRegulon
0	-2.58355	0.284	0.52	0	preGC-I	ESR1.MA0112.3
0	-2.73714	0.234	0.508	0	preGC-I	RARA(var.2).MA0730.1
0	-2.88072	0.23	0.535	0	preGC-I	UNC4-HUMAN.H10MO.D
0	-2.94757	0.235	0.534	0	preGC-I	PRRX1.SwissRegulon
0	-2.96748	0.218	0.527	0	preGC-I	BARX2.SwissRegulon
0	-3.00563	0.199	0.535	0	preGC-I	ISX.SwissRegulon
0	-3.01984	0.204	0.531	0	preGC-I	ALX3-HUMAN.H10MO.D
0	-3.02643	0.238	0.529	0	preGC-I	SHOX2.SwissRegulon
0	-3.03154	0.213	0.533	0	preGC-I	DRGX-HUMAN.H10MO.D
0	-3.15141	0.201	0.51	0	preGC-I	JUND(var.2).MA0492.1
0	-3.1862	0.221	0.534	0	preGC-I	HXD3-HUMAN.H10MO.D
0	-3.30973	0.682	0.384	0	preGC-I	TWIST1.MA1123.1
0	-3.36657	0.21	0.538	0	preGC-I	PHX2A-HUMAN.H10MO.D
0	-3.38807	0.735	0.382	0	preGC-I	ZBTB18.MA0698.1
0	-3.41673	0.195	0.533	0	preGC-I	PHX2B-HUMAN.H10MO.D
0	-3.44274	0.262	0.49	0	preGC-I	FOSL2::JUN(var.2).MA1131.1
0	-3.46517	0.205	0.541	0	preGC-I	DLX6-HUMAN.H10MO.D
0	-3.49293	0.208	0.55	0	preGC-I	BARX2-HUMAN.H10MO.D
0	-3.51219	0.181	0.531	0	preGC-I	LHX2.SwissRegulon
0	-3.52344	0.235	0.511	0	preGC-I	ATF7-HUMAN.H10MO.D
0	-3.52579	0.182	0.541	0	preGC-I	BSH-HUMAN.H10MO.D
0	-3.57631	0.229	0.538	0	preGC-I	GSX1-HUMAN.H10MO.D
0	-3.6107	0.214	0.533	0	preGC-I	VENTX.MA0724.1
0	-3.73894	0.272	0.494	0	preGC-I	FOSL1::JUN(var.2).MA1129.1
0	-3.7435	0.214	0.528	0	preGC-I	HXD4-HUMAN.H10MO.D
0	-3.7435	0.214	0.528	0	preGC-I	HOXD4.SwissRegulon
0	-3.79456	0.21	0.538	0	preGC-I	BARHL2.SwissRegulon
0	-3.80572	0.203	0.541	0	preGC-I	PROP1.MA0715.1
0	-3.8569	0.246	0.512	0	preGC-I	RORA-HUMAN.H10MO.B
0	-3.86138	0.681	0.4	0	preGC-I	TCF4.SwissRegulon
0	-3.91515	0.662	0.398	0	preGC-I	ZBT18-HUMAN.H10MO.D
0	-3.95832	0.179	0.53	0	preGC-I	EMX2.SwissRegulon
0	-4.10376	0.71	0.384	0	preGC-I	ZBTB18.HOMER
0	-4.10991	0.259	0.484	0	preGC-I	PITX1.SwissRegulon
0	-4.11474	0.177	0.55	0	preGC-I	VAX2-HUMAN.H10MO.D
0	-4.23241	0.216	0.547	0	preGC-I	HOXA5.MA0158.1
0	-4.28646	0.192	0.543	0	preGC-I	PHOX2A.SwissRegulon
0	-4.34355	0.213	0.54	0	preGC-I	ISL2-HUMAN.H10MO.D
0	-4.35717	0.699	0.397	0	preGC-I	ITF2-HUMAN.H10MO.B
0	-4.36741	0.167	0.544	0	preGC-I	PROP1.SwissRegulon
0	-4.37053	0.2	0.534	0	preGC-I	GBX1-HUMAN.H10MO.D
0	-4.56062	0.182	0.543	0	preGC-I	MEOX1-HUMAN.H10MO.D
0	-4.58873	0.689	0.396	0	preGC-I	TCF4.MA0830.1
0	-4.67911	0.185	0.545	0	preGC-I	POU6F2.SwissRegulon
0	-4.7321	0.151	0.544	0	preGC-I	DLX2.SwissRegulon
0	-4.77622	0.164	0.537	0	preGC-I	ESX1.SwissRegulon
0	-4.81551	0.188	0.544	0	preGC-I	HOXA3.SwissRegulon
0	-4.93454	0.166	0.542	0	preGC-I	LHX3-HUMAN.H10MO.C
0	-5.06322	0.213	0.53	0	preGC-I	LHX2-HUMAN.H10MO.D
0	-5.12236	0.246	0.485	0	preGC-I	RARA.MA0729.1
0	-5.13807	0.204	0.539	0	preGC-I	ESX1-HUMAN.H10MO.D
0	-5.22002	0.146	0.549	0	preGC-I	VAX1-HUMAN.H10MO.D
0	-5.24243	0.169	0.539	0	preGC-I	LHX9-HUMAN.H10MO.D
0	-5.28936	0.178	0.541	0	preGC-I	PHOX2A.MA0713.1
0	-5.29281	0.154	0.415	0	preGC-I	SOX13-HUMAN.H10MO.D
0	-5.41539	0.166	0.55	0	preGC-I	MEOX2-HUMAN.H10MO.D
0	-5.43306	0.152	0.531	0	preGC-I	BARX1.MA0875.1
0	-5.57	0.7	0.399	0	preGC-I	TCF3.MA0522.2
0	-5.77967	0.169	0.543	0	preGC-I	NOTO-HUMAN.H10MO.D
0	-5.84021	0.181	0.541	0	preGC-I	DLX4-HUMAN.H10MO.D
0	-6.35724	0.175	0.553	0	preGC-I	GBX2-HUMAN.H10MO.D
0	-6.42167	0.128	0.55	0	preGC-I	LHX4-HUMAN.H10MO.D
0	-6.44128	0.726	0.413	0	preGC-I	TAL1::TCF3.MA0091.1
0	-6.57721	0.157	0.547	0	preGC-I	VSX2-HUMAN.H10MO.D
0	-6.67343	0.128	0.545	0	preGC-I	RX-HUMAN.H10MO.D
0	-6.68009	0.168	0.55	0	preGC-I	SHOX-HUMAN.H10MO.D
0	-6.73559	0.149	0.547	0	preGC-I	PO4F2-HUMAN.H10MO.D
0	-6.78923	0.175	0.546	0	preGC-I	MIXL1-HUMAN.H10MO.D
0	-6.80107	0.149	0.548	0	preGC-I	VSX1.SwissRegulon
0	-6.95215	0.172	0.541	0	preGC-I	HME1-HUMAN.H10MO.D
0	-6.97663	0.12	0.54	0	preGC-I	PO6F2-HUMAN.H10MO.D
0	-7.00778	0.147	0.54	0	preGC-I	LMX1B.SwissRegulon
0	-7.04955	0.16	0.551	0	preGC-I	DLX3.SwissRegulon
0	-7.09703	0.14	0.54	0	preGC-I	GBX2.SwissRegulon
0	-7.35294	0.177	0.548	0	preGC-I	MEOX1.SwissRegulon
0	-7.40821	0.155	0.548	0	preGC-I	ISX-HUMAN.H10MO.D
0	-7.47355	0.132	0.549	0	preGC-I	EMX1.SwissRegulon
0	-7.51655	0.167	0.559	0	preGC-I	GSX1.SwissRegulon
0	-7.56117	0.155	0.552	0	preGC-I	VAX1.MA0722.1
0	-7.56117	0.155	0.552	0	preGC-I	VAX2.MA0723.1
0	-7.60158	0.138	0.554	0	preGC-I	PDX1.SwissRegulon
0	-7.63238	0.156	0.548	0	preGC-I	VENTX.SwissRegulon
0	-7.68053	0.146	0.553	0	preGC-I	MIXL1.SwissRegulon
0	-7.78718	0.129	0.553	0	preGC-I	LMX1B.MA0703.1
0	-7.86036	0.139	0.549	0	preGC-I	HOXD3.SwissRegulon
0	-7.86319	0.184	0.548	0	preGC-I	DLX6.MA0882.1
0	-7.86319	0.184	0.548	0	preGC-I	DLX6.SwissRegulon
0	-7.9343	0.156	0.54	0	preGC-I	LMX1A.MA0702.1
0	-7.9343	0.156	0.54	0	preGC-I	LHX4.SwissRegulon
0	-7.97849	0.137	0.544	0	preGC-I	EMX1-HUMAN.H10MO.D
0	-8.11209	0.138	0.552	0	preGC-I	EN2.SwissRegulon
0	-8.24976	0.133	0.542	0	preGC-I	EMX2-HUMAN.H10MO.D
0	-8.39259	0.164	0.505	0	preGC-I	RARA-HUMAN.H10MO.S
0	-8.39259	0.164	0.505	0	preGC-I	RARG-HUMAN.H10MO.S
0	-8.39259	0.164	0.505	0	preGC-I	RARG.SwissRegulon
0	-8.47589	0.187	0.541	0	preGC-I	HXB3-HUMAN.H10MO.D
0	-8.56409	0.166	0.55	0	preGC-I	EVX1.SwissRegulon
0	-8.56848	0.123	0.554	0	preGC-I	MEOX2.MA0706.1
0	-9.06572	0.153	0.553	0	preGC-I	HOXA5.SwissRegulon
0	-9.07621	0.134	0.547	0	preGC-I	POU4F2.SwissRegulon
0	-9.0843	0.157	0.555	0	preGC-I	DLX3-HUMAN.H10MO.C
0	-9.32855	0.131	0.554	0	preGC-I	NOTO.SwissRegulon
0	-9.47928	0.105	0.546	0	preGC-I	EN1.SwissRegulon
0	-9.54363	0.144	0.556	0	preGC-I	SHOX2-HUMAN.H10MO.D
0	-9.88612	0.204	0.479	0	preGC-I	ESRRA.SwissRegulon
0	-10.0127	0.142	0.56	0	preGC-I	NKX6-1.SwissRegulon
0	-10.2687	0.136	0.552	0	preGC-I	EVX1.MA0887.1
0	-10.2745	0.134	0.544	0	preGC-I	POU6F1.MA0628.1
0	-10.3437	0.115	0.543	0	preGC-I	LBX2-HUMAN.H10MO.D
0	-10.378	0.128	0.552	0	preGC-I	PDX1-HUMAN.H10MO.C
0	-10.4304	0.121	0.551	0	preGC-I	PDX1.MA0132.2
0	-10.4554	0.169	0.471	0	preGC-I	ESR2-HUMAN.H10MO.S
0	-10.4554	0.169	0.471	0	preGC-I	ESR2.SwissRegulon
0	-11.1302	0.147	0.557	0	preGC-I	HOXB2.SwissRegulon
0	-11.8007	0.108	0.55	0	preGC-I	GBX1.SwissRegulon
0	-12.3014	0.226	0.463	0	preGC-I	RARB-HUMAN.H10MO.D
0	-12.5827	0.153	0.483	0	preGC-I	RORA.MA0071.1
0	-12.6521	0.121	0.558	0	preGC-I	MNX1.MA0707.1
0	-12.9494	0.176	0.558	0	preGC-I	NKX62-HUMAN.H10MO.D
0	-13.0012	0.108	0.549	0	preGC-I	RAX.MA0718.1
0	-13.0349	0.132	0.545	0	preGC-I	VSX1-HUMAN.H10MO.D
0	-13.3839	0.104	0.548	0	preGC-I	HESX1.MA0894.1
0	-13.6009	0.172	0.479	0	preGC-I	NR2F1.MA0017.2
0	-14.2897	0.097	0.551	0	preGC-I	GBX1.MA0889.1
0	-14.6557	0.108	0.554	0	preGC-I	VSX1.MA0725.1
0	-14.6557	0.108	0.554	0	preGC-I	VSX2.MA0726.1
0	-15.1289	0.13	0.549	0	preGC-I	EVX2.MA0888.1
0	-15.2803	0.116	0.556	0	preGC-I	NOBOX-HUMAN.H10MO.C
0	-15.3422	0.108	0.547	0	preGC-I	LHX6.MA0658.1
0	-15.5447	0.113	0.545	0	preGC-I	ZBT49-HUMAN.H10MO.D
0	-15.5924	0.101	0.55	0	preGC-I	LBX2.SwissRegulon
0	-15.6082	0.102	0.551	0	preGC-I	EN2.MA0642.1
0	-16.0682	0.102	0.547	0	preGC-I	EN1.MA0027.2
0	-16.3021	0.115	0.553	0	preGC-I	MEOX1.MA0661.1
0	-16.3059	0.102	0.561	0	preGC-I	PRRX2-HUMAN.H10MO.C
0	-16.7996	0.099	0.555	0	preGC-I	MSX1.MA0666.1
0	-16.7996	0.099	0.555	0	preGC-I	MSX2.MA0708.1
0	-16.7996	0.099	0.555	0	preGC-I	BSX.MA0876.1
0	-16.9863	0.15	0.472	0	preGC-I	RORA.SwissRegulon
0	-17.0452	0.095	0.553	0	preGC-I	ESX1.MA0644.1
0	-17.2362	0.109	0.558	0	preGC-I	ALX3.MA0634.1
0	-17.2374	0.142	0.462	0	preGC-I	NR4A2.SwissRegulon
0	-17.2462	0.103	0.553	0	preGC-I	MIXL1.MA0662.1
0	-17.2889	0.11	0.554	0	preGC-I	EMX1.MA0612.1
0	-18.2124	0.109	0.555	0	preGC-I	HOXB2.MA0902.1
0	-18.2479	0.175	0.469	0	preGC-I	ESRRG.SwissRegulon
0	-18.3798	0.105	0.558	0	preGC-I	NKX6-2.MA0675.1
0	-18.5518	0.104	0.558	0	preGC-I	GBX2.MA0890.1
0	-19.5694	0.102	0.553	0	preGC-I	EMX2.MA0886.1
0	-19.7883	0.106	0.551	0	preGC-I	SHOX.MA0630.1
0	-19.7883	0.106	0.551	0	preGC-I	PRRX1.MA0716.1
0	-19.9373	0.138	0.452	0	preGC-I	NR4A1-HUMAN.H10MO.C
0	-20.1784	0.106	0.559	0	preGC-I	GSX2.MA0893.1
0	-20.3793	0.105	0.555	0	preGC-I	NKX6-1.MA0674.1
0	-20.7097	0.121	0.558	0	preGC-I	HOXA2.MA0900.1
0	-20.9319	0.126	0.467	0	preGC-I	NR4A2.MA0160.1
0	-21.029	0.093	0.553	0	preGC-I	NOTO.MA0710.1
0	-21.2592	0.101	0.559	0	preGC-I	GSX1.MA0892.1
0	-21.3612	0.102	0.553	0	preGC-I	UNCX.MA0721.1
0	-21.3612	0.102	0.553	0	preGC-I	UNCX.SwissRegulon
0	-21.3872	0.107	0.552	0	preGC-I	HOXB3.MA0903.1
0	-21.5179	0.157	0.464	0	preGC-I	NR5A2-HUMAN.H10MO.C
0	-21.9277	0.093	0.558	0	preGC-I	ISX.MA0654.1
0	-21.9277	0.093	0.558	0	preGC-I	LHX9.MA0701.1
0	-21.9277	0.093	0.558	0	preGC-I	RAX2.MA0717.1
0	-21.9277	0.093	0.558	0	preGC-I	BSX.SwissRegulon
0	-21.9277	0.093	0.558	0	preGC-I	RAX2.SwissRegulon
0	-21.9277	0.093	0.558	0	preGC-I	SHOX.SwissRegulon
0	-22.3728	0.169	0.473	0	preGC-I	ESRRB.SwissRegulon
0	-22.5036	0.094	0.552	0	preGC-I	PAX4.MA0068.2
0	-22.5036	0.094	0.552	0	preGC-I	VSX2.SwissRegulon
0	-24.0298	0.107	0.564	0	preGC-I	POU6F2.MA0793.1
0	-24.482	0.161	0.451	0	preGC-I	ERR3-HUMAN.H10MO.B
0	-24.8268	0.138	0.469	0	preGC-I	ERR2-HUMAN.H10MO.A
0	-25.2257	0.181	0.461	0	preGC-I	SF1.HOMER
0	-25.9728	0.108	0.469	0	preGC-I	NR2F2.MA1111.1
0	-27.1113	0.094	0.553	0	preGC-I	LHX2.MA0700.1
0	-27.1764	0.092	0.555	0	preGC-I	LBX2.MA0699.1
0	-28.3216	0.103	0.557	0	preGC-I	LBX1.MA0618.1
0	-31.4223	0.105	0.466	0	preGC-I	PPARA-HUMAN.H10MO.S
0	-31.4223	0.105	0.466	0	preGC-I	PPARA.SwissRegulon
0	-33.6942	0.126	0.47	0	preGC-I	STF1-HUMAN.H10MO.B
0	-34.5418	0.116	0.472	0	preGC-I	ESRRB.MA0141.3
0	-35.1563	0.158	0.462	0	preGC-I	NR5A2.SwissRegulon
8.89318e-323	-2.67085	0.246	0.53	1.70749e-319	preGC-I	ALX1.SwissRegulon
3.50787e-322	-0.812357	0.644	0.424	6.7351e-319	preGC-I	SNAI2.SwissRegulon
5.03947e-322	-2.65933	0.291	0.501	9.67578e-319	preGC-I	JUNB(var.2).MA1140.1
9.68616e-320	1.08286	0.617	0.419	1.85974e-316	preGC-I	E2F6.MA0471.1
2.43792e-319	0.969314	0.637	0.436	4.6808e-316	preGC-I	BHE23-HUMAN.H10MO.D
9.19817e-319	0.359631	0.658	0.415	1.76605e-315	preGC-I	ONECUT2.SwissRegulon
4.24755e-317	-1.60792	0.29	0.506	8.1553e-314	preGC-I	NR1A4::RXRA.MA1146.1
4.254e-317	-0.909277	0.319	0.518	8.16768e-314	preGC-I	KLF1.SwissRegulon
8.87942e-317	-15.1199	0.226	0.461	1.70485e-313	preGC-I	NR4A1.MA1112.1
3.81985e-316	0.737226	0.67	0.46	7.33411e-313	preGC-I	NRF1.HOMER
1.42962e-314	-0.445319	0.651	0.412	2.74488e-311	preGC-I	MAFF.MA0495.2
1.78056e-314	-0.279823	0.677	0.405	3.41868e-311	preGC-I	BMYB.HOMER
5.96536e-314	0.856539	0.642	0.429	1.14535e-310	preGC-I	TF2LX-HUMAN.H10MO.D
4.39561e-311	0.69801	0.608	0.414	8.43957e-308	preGC-I	BCL6.SwissRegulon
6.37531e-311	-2.45161	0.251	0.533	1.22406e-307	preGC-I	ALX3.SwissRegulon
3.09935e-309	-0.989686	0.315	0.525	5.95076e-306	preGC-I	NR1H2.SwissRegulon
3.42041e-307	0.854039	0.641	0.45	6.56719e-304	preGC-I	KLF6.SwissRegulon
1.90651e-306	-1.41273	0.27	0.482	3.6605e-303	preGC-I	CREB1.MA0018.3
5.46444e-306	-1.48577	0.307	0.519	1.04917e-302	preGC-I	HOXA13.SwissRegulon
7.52768e-306	-1.77752	0.3	0.497	1.44531e-302	preGC-I	RARB.SwissRegulon
3.80622e-305	-1.74891	0.315	0.524	7.30794e-302	preGC-I	NFKB1.MA0105.4
5.0548e-305	-1.46704	0.297	0.505	9.70522e-302	preGC-I	ATF1.SwissRegulon
6.94791e-305	-1.88726	0.272	0.533	1.334e-301	preGC-I	VAX2.SwissRegulon
5.61544e-304	-0.34178	0.659	0.405	1.07817e-300	preGC-I	IRF1.MA0050.2
8.27483e-304	-1.98319	0.31	0.517	1.58877e-300	preGC-I	NFKB2.MA0778.1
7.42215e-302	0.722482	0.611	0.415	1.42505e-298	preGC-I	UBIP1-HUMAN.H10MO.D
7.58038e-301	0.792712	0.635	0.432	1.45543e-297	preGC-I	IRF5.SwissRegulon
1.03519e-300	-0.943517	0.656	0.428	1.98757e-297	preGC-I	E2A.HOMER
1.01451e-298	0.831213	0.598	0.39	1.94785e-295	preGC-I	RUNX.HOMER
2.8272e-298	-1.93127	0.282	0.529	5.42823e-295	preGC-I	OTP.SwissRegulon
3.58624e-298	-1.93771	0.277	0.519	6.88558e-295	preGC-I	POU4F2.MA0683.1
2.62793e-296	-4.0126	0.231	0.545	5.04562e-293	preGC-I	HXA2-HUMAN.H10MO.D
3.79294e-296	-0.73502	0.638	0.422	7.28244e-293	preGC-I	IRF9.MA0653.1
4.4925e-296	-3.02017	0.292	0.5	8.6256e-293	preGC-I	FOSB::JUNB(var.2).MA1136.1
6.60731e-295	0.542655	0.629	0.388	1.2686e-291	preGC-I	RUNX2.SwissRegulon
2.36056e-293	0.718815	0.638	0.442	4.53227e-290	preGC-I	MYC.MA0147.3
4.08444e-293	0.642373	0.61	0.427	7.84212e-290	preGC-I	STAT3-HUMAN.H10MO.A
1.9658e-292	-0.79803	0.336	0.528	3.77434e-289	preGC-I	KLF12-HUMAN.H10MO.D
6.64496e-292	0.823152	0.631	0.425	1.27583e-288	preGC-I	ETV6.SwissRegulon
1.04414e-291	-1.44738	0.291	0.519	2.00474e-288	preGC-I	POU4F3.MA0791.1
2.39666e-291	-1.02648	0.311	0.513	4.60159e-288	preGC-I	DBX2.SwissRegulon
1.17005e-290	0.788494	0.644	0.446	2.2465e-287	preGC-I	MECP2-HUMAN.H10MO.C
1.17005e-290	0.788494	0.644	0.446	2.2465e-287	preGC-I	MECP2.SwissRegulon
2.04168e-290	-4.22607	0.274	0.484	3.92002e-287	preGC-I	FOSL2::JUND(var.2).MA1145.1
5.70639e-290	-1.885	0.278	0.525	1.09563e-286	preGC-I	ZFHX3.SwissRegulon
2.89438e-289	-2.61788	0.248	0.54	5.55721e-286	preGC-I	LHX3.SwissRegulon
7.4978e-289	0.834697	0.613	0.416	1.43958e-285	preGC-I	UBP1.SwissRegulon
2.77444e-288	-2.5006	0.291	0.491	5.32692e-285	preGC-I	MEF2B.SwissRegulon
5.74862e-287	-3.92733	0.218	0.537	1.10374e-283	preGC-I	RAX2-HUMAN.H10MO.D
4.88183e-286	0.615431	0.646	0.447	9.37311e-283	preGC-I	POU2F2.MA0507.1
1.26826e-285	-3.37555	0.286	0.493	2.43507e-282	preGC-I	FOSL2::JUNB(var.2).MA1139.1
2.71453e-285	-7.8336	0.202	0.55	5.21191e-282	preGC-I	MNX1.SwissRegulon
4.66754e-285	-1.67963	0.298	0.499	8.96168e-282	preGC-I	ZIC3-HUMAN.H10MO.C
5.0356e-285	0.732408	0.604	0.418	9.66836e-282	preGC-I	STAT3.MA0144.2
8.24351e-285	-0.899518	0.315	0.517	1.58275e-281	preGC-I	HLX.SwissRegulon
3.91994e-283	-9.30584	0.162	0.358	7.52629e-280	preGC-I	SOX9.MA0077.1
6.07555e-283	-1.18575	0.313	0.512	1.16651e-279	preGC-I	RORB.MA1150.1
3.90044e-281	-1.88677	0.285	0.516	7.48884e-278	preGC-I	PAX4-HUMAN.H10MO.D
2.09367e-280	-0.352467	0.618	0.405	4.01984e-277	preGC-I	PU.1:IRF8.HOMER
6.52557e-279	0.172623	0.617	0.434	1.25291e-275	preGC-I	NEUROD1.MA1109.1
1.44916e-278	-18.799	0.125	0.341	2.78238e-275	preGC-I	DMRT6.HOMER
1.9061e-278	-1.34433	0.296	0.503	3.65972e-275	preGC-I	THB-HUMAN.H10MO.S
2.74763e-278	1.31016	0.627	0.441	5.27545e-275	preGC-I	ZEB1.SwissRegulon
3.99332e-278	0.890056	0.627	0.447	7.66718e-275	preGC-I	ZBT7B-HUMAN.H10MO.D
5.88401e-278	-2.91678	0.238	0.552	1.12973e-274	preGC-I	HOXD9.SwissRegulon
7.78003e-278	0.804838	0.626	0.434	1.49377e-274	preGC-I	ZNF384.SwissRegulon
6.93705e-276	-2.11855	0.275	0.532	1.33191e-272	preGC-I	PAX3-HUMAN.H10MO.D
1.86521e-275	0.710837	0.648	0.453	3.5812e-272	preGC-I	E2F8-HUMAN.H10MO.D
3.00757e-275	-0.347138	0.678	0.414	5.77453e-272	preGC-I	FOXL1-HUMAN.H10MO.D
2.20947e-274	-0.122775	0.616	0.42	4.24219e-271	preGC-I	ERG.SwissRegulon
6.5845e-274	-0.279072	0.682	0.424	1.26422e-270	preGC-I	FOXO1-HUMAN.H10MO.C
3.60991e-272	-0.807027	0.329	0.518	6.93103e-269	preGC-I	EKLF.HOMER
6.39405e-272	-5.4162	0.636	0.41	1.22766e-268	preGC-I	ID4.MA0824.1
4.42662e-270	-1.2542	0.3	0.517	8.49912e-267	preGC-I	ISL2.SwissRegulon
3.59441e-268	-1.97946	0.282	0.528	6.90126e-265	preGC-I	LHX8.SwissRegulon
5.00045e-267	0.0760988	0.663	0.47	9.60087e-264	preGC-I	TCFL2.HOMER
6.11194e-267	0.552376	0.64	0.435	1.17349e-263	preGC-I	CPEB1.SwissRegulon
2.85485e-266	-1.24496	0.326	0.513	5.48132e-263	preGC-I	ARID5A.SwissRegulon
1.08048e-264	-1.02608	0.326	0.52	2.07452e-261	preGC-I	VAX1.SwissRegulon
2.60576e-263	-14.5692	0.152	0.353	5.00305e-260	preGC-I	DMRT3.MA0610.1
1.22312e-262	0.854689	0.608	0.429	2.34839e-259	preGC-I	EPAS1-HUMAN.H10MO.D
4.56799e-262	-4.18827	0.214	0.549	8.77054e-259	preGC-I	MEOX2.SwissRegulon
1.51262e-261	-2.07647	0.665	0.472	2.90424e-258	preGC-I	TCF7L2.MA0523.1
2.47818e-261	-1.41085	0.323	0.509	4.7581e-258	preGC-I	POU2F3.SwissRegulon
2.76116e-260	-2.3193	0.274	0.531	5.30143e-257	preGC-I	DUXA-HUMAN.H10MO.D
7.09475e-260	-2.03483	0.288	0.527	1.36219e-256	preGC-I	PAX3.MA0780.1
7.64815e-260	-6.20123	0.19	0.56	1.46845e-256	preGC-I	ARI3A-HUMAN.H10MO.S
8.02363e-260	0.776584	0.64	0.454	1.54054e-256	preGC-I	E2F7.SwissRegulon
2.73433e-259	0.174251	0.615	0.421	5.24991e-256	preGC-I	ATOH1.SwissRegulon
2.11147e-258	-1.10672	0.617	0.426	4.05402e-255	preGC-I	ETS1-HUMAN.H10MO.C
4.60552e-258	-1.13661	0.317	0.502	8.84259e-255	preGC-I	DBP-HUMAN.H10MO.B
4.6525e-256	-0.0220217	0.631	0.433	8.9328e-253	preGC-I	IRF4.MA1419.1
4.61074e-255	-3.0512	0.27	0.453	8.85262e-252	preGC-I	PAX5-HUMAN.H10MO.S
4.61074e-255	-3.0512	0.27	0.453	8.85262e-252	preGC-I	PAX5.SwissRegulon
5.76247e-255	-4.15181	0.29	0.497	1.10639e-251	preGC-I	ESR2.MA0258.2
7.37897e-254	0.807044	0.619	0.44	1.41676e-250	preGC-I	SCRT1-HUMAN.H10MO.D
7.99363e-254	-1.49837	0.301	0.522	1.53478e-250	preGC-I	POU1F1.SwissRegulon
1.73266e-253	-1.86735	0.288	0.53	3.3267e-250	preGC-I	HOXB4.SwissRegulon
2.98117e-253	-3.5145	0.248	0.542	5.72385e-250	preGC-I	HOXD13.SwissRegulon
8.05518e-253	0.879082	0.613	0.44	1.54659e-249	preGC-I	MAFB.MAFB.SwissRegulon
2.75728e-252	0.770767	0.616	0.436	5.29399e-249	preGC-I	EPAS1.SwissRegulon
4.82551e-252	0.501536	0.619	0.424	9.26498e-249	preGC-I	EHF.HOMER
6.84971e-252	0.686649	0.63	0.437	1.31514e-248	preGC-I	NRL-HUMAN.H10MO.D
2.32363e-251	0.0948294	0.61	0.423	4.46137e-248	preGC-I	ETS1.SwissRegulon
1.03796e-250	-7.49793	0.248	0.46	1.99289e-247	preGC-I	NR4A3-HUMAN.H10MO.D
1.03796e-250	-7.49793	0.248	0.46	1.99289e-247	preGC-I	NR4A3.SwissRegulon
1.68154e-249	0.945233	0.596	0.431	3.22856e-246	preGC-I	PATZ1.SwissRegulon
3.02462e-249	0.727077	0.626	0.439	5.80727e-246	preGC-I	MYC-HUMAN.H10MO.A
9.75341e-249	-4.99012	0.222	0.555	1.87265e-245	preGC-I	HXA5-HUMAN.H10MO.D
1.17556e-248	0.736124	0.628	0.447	2.25708e-245	preGC-I	MXI1.MA1108.1
1.30135e-248	-1.05768	0.313	0.517	2.49859e-245	preGC-I	PO4F1-HUMAN.H10MO.D
6.5837e-247	0.737011	0.63	0.439	1.26407e-243	preGC-I	FOXH1-HUMAN.H10MO.A
5.32816e-246	0.731801	0.639	0.455	1.02301e-242	preGC-I	ELF2.SwissRegulon
3.67633e-245	0.704277	0.628	0.447	7.05855e-242	preGC-I	ELK1.SwissRegulon
6.6845e-244	-1.99756	0.316	0.507	1.28342e-240	preGC-I	NR4A2::RXRA.MA1147.1
1.21279e-243	0.756806	0.62	0.451	2.32856e-240	preGC-I	BHA15-HUMAN.H10MO.D
1.45567e-241	0.795745	0.617	0.442	2.79489e-238	preGC-I	RFX2-HUMAN.H10MO.C
7.9397e-241	0.702605	0.609	0.422	1.52442e-237	preGC-I	T1ISRE.HOMER
7.9886e-241	0.739026	0.628	0.448	1.53381e-237	preGC-I	IRF5.MA1420.1
3.08007e-240	-0.971914	0.33	0.513	5.91373e-237	preGC-I	HOXD8.SwissRegulon
1.49531e-239	-0.0171288	0.603	0.422	2.871e-236	preGC-I	NEUROG2.SwissRegulon
4.68053e-239	0.532564	0.598	0.431	8.98662e-236	preGC-I	STAT1.MA0137.3
2.03543e-238	-1.30801	0.309	0.508	3.90802e-235	preGC-I	POU4F1.MA0790.1
1.36898e-237	0.674407	0.62	0.436	2.62845e-234	preGC-I	IRF3.SwissRegulon
2.50788e-236	-1.65853	0.321	0.492	4.81514e-233	preGC-I	VDR-HUMAN.H10MO.S
6.20947e-236	-2.20532	0.286	0.531	1.19222e-232	preGC-I	DUXA.MA0884.1
6.93521e-236	-2.56139	0.276	0.54	1.33156e-232	preGC-I	DUXA.SwissRegulon
8.40413e-235	-1.68307	0.308	0.486	1.61359e-231	preGC-I	IKZF1-HUMAN.H10MO.C
8.40413e-235	-1.68307	0.308	0.486	1.61359e-231	preGC-I	IKZF1.SwissRegulon
1.70436e-234	-0.305872	0.611	0.431	3.27238e-231	preGC-I	NFATC2.MA0152.1
1.70436e-234	-0.305872	0.611	0.431	3.27238e-231	preGC-I	NFATC2.SwissRegulon
2.7069e-233	-3.3799	0.238	0.561	5.19726e-230	preGC-I	HXD9-HUMAN.H10MO.D
2.20147e-231	-1.47945	0.313	0.519	4.22683e-228	preGC-I	ARX.SwissRegulon
3.67902e-231	-1.2049	0.341	0.51	7.06371e-228	preGC-I	CEBPD.SwissRegulon
5.11934e-231	0.667946	0.634	0.444	9.82913e-228	preGC-I	CREB3L2.SwissRegulon
9.98714e-231	0.178114	0.646	0.425	1.91753e-227	preGC-I	CEBP:CEBP.HOMER
8.79015e-230	0.662532	0.631	0.448	1.68771e-226	preGC-I	CENPB.SwissRegulon
7.54469e-229	-0.901799	0.347	0.515	1.44858e-225	preGC-I	KLF4-HUMAN.H10MO.A
1.14112e-228	-1.0736	0.318	0.496	2.19095e-225	preGC-I	ATF1-HUMAN.H10MO.B
3.05362e-227	-0.910095	0.346	0.513	5.86296e-224	preGC-I	KLF4.SwissRegulon
6.52744e-227	0.753898	0.609	0.439	1.25327e-223	preGC-I	ZN384-HUMAN.H10MO.C
1.24571e-226	-1.03641	0.602	0.427	2.39176e-223	preGC-I	OLIG1-HUMAN.H10MO.D
1.56355e-225	-3.25694	0.307	0.489	3.00201e-222	preGC-I	FOSB::JUN.MA1127.1
1.29364e-224	0.590741	0.622	0.437	2.4838e-221	preGC-I	ERG-HUMAN.H10MO.B
1.46786e-224	0.616147	0.602	0.429	2.81829e-221	preGC-I	STA5B-HUMAN.H10MO.C
2.57263e-224	-3.3748	0.296	0.451	4.93945e-221	preGC-I	SRF-HUMAN.H10MO.A
5.89447e-224	0.689634	0.606	0.428	1.13174e-220	preGC-I	PRDM1.MA0508.2
2.79826e-223	-1.29755	0.319	0.52	5.37265e-220	preGC-I	VENTX-HUMAN.H10MO.D
8.22974e-221	0.839277	0.58	0.439	1.58011e-217	preGC-I	MTA3.SwissRegulon
8.73924e-221	0.583511	0.631	0.444	1.67793e-217	preGC-I	FOXP3-HUMAN.H10MO.D
4.34931e-220	0.668147	0.631	0.459	8.35067e-217	preGC-I	ZBTB33.MA0527.1
5.76758e-220	-1.16677	0.333	0.506	1.10737e-216	preGC-I	ATF4.MA0833.1
1.07221e-219	0.840962	0.598	0.426	2.05865e-216	preGC-I	STA5A-HUMAN.H10MO.B
1.63853e-218	-2.27506	0.285	0.527	3.14599e-215	preGC-I	DRGX.SwissRegulon
4.20997e-218	0.829524	0.589	0.424	8.08314e-215	preGC-I	STAT4-HUMAN.H10MO.D
5.74131e-218	-0.70772	0.374	0.546	1.10233e-214	preGC-I	KLF14.SwissRegulon
7.96723e-217	-2.27092	0.316	0.486	1.52971e-213	preGC-I	USF1-HUMAN.H10MO.A
1.22801e-216	0.669391	0.622	0.444	2.35778e-213	preGC-I	HIF1A.MA1106.1
1.24768e-216	-10.4458	0.172	0.349	2.39554e-213	preGC-I	SOX13.MA1120.1
2.37978e-216	-0.0863563	0.599	0.419	4.56918e-213	preGC-I	SPI1.SwissRegulon
9.80588e-216	-0.926778	0.331	0.518	1.88273e-212	preGC-I	POU4F3.SwissRegulon
1.67875e-215	0.75901	0.618	0.451	3.2232e-212	preGC-I	TFAP2E.SwissRegulon
2.68168e-214	0.309096	0.578	0.416	5.14882e-211	preGC-I	WRNIP1.SwissRegulon
3.42535e-213	0.698656	0.621	0.452	6.57668e-210	preGC-I	HEY1.MA0823.1
4.21949e-213	0.677487	0.601	0.426	8.10143e-210	preGC-I	STAT6.SwissRegulon
2.09849e-212	0.544702	0.597	0.432	4.0291e-209	preGC-I	ELK4.SwissRegulon
4.85039e-212	0.63467	0.633	0.464	9.31274e-209	preGC-I	E2F1.SwissRegulon
4.94447e-210	-0.869101	0.348	0.517	9.49338e-207	preGC-I	RORC.MA1151.1
1.56208e-209	-1.42796	0.322	0.521	2.9992e-206	preGC-I	HOXA7.SwissRegulon
2.14534e-209	0.703833	0.612	0.446	4.11906e-206	preGC-I	CREB3L1.SwissRegulon
3.45324e-209	-1.47788	0.335	0.535	6.63022e-206	preGC-I	LHX6.SwissRegulon
5.99155e-208	-0.838005	0.326	0.506	1.15038e-204	preGC-I	HXD11-HUMAN.H10MO.D
1.63009e-207	-3.47459	0.266	0.545	3.12977e-204	preGC-I	LHX6-HUMAN.H10MO.D
1.70116e-207	0.366868	0.647	0.466	3.26623e-204	preGC-I	SNAI1-HUMAN.H10MO.C
2.54645e-207	0.358589	0.601	0.427	4.88919e-204	preGC-I	FLI1.SwissRegulon
2.65293e-207	-1.57081	0.329	0.498	5.09363e-204	preGC-I	MEF2B-HUMAN.H10MO.D
2.61071e-206	-1.53042	0.314	0.48	5.01256e-203	preGC-I	THA-HUMAN.H10MO.C
4.16103e-206	0.839062	0.586	0.438	7.98917e-203	preGC-I	E2F6.SwissRegulon
6.56997e-206	-1.20279	0.319	0.48	1.26143e-202	preGC-I	VDR-HUMAN.H10MO.B
4.46766e-205	-1.29364	0.328	0.525	8.5779e-202	preGC-I	NKX61-HUMAN.H10MO.D
4.75666e-205	0.333222	0.617	0.442	9.1328e-202	preGC-I	ETV2.MA0762.1
5.81218e-205	-1.95276	0.305	0.526	1.11594e-201	preGC-I	ARX-HUMAN.H10MO.D
5.81321e-205	-2.26192	0.33	0.504	1.11614e-201	preGC-I	ATF7.MA0834.1
6.05888e-205	-0.893596	0.336	0.509	1.16331e-201	preGC-I	POU4F1.SwissRegulon
9.30075e-205	0.598792	0.611	0.44	1.78574e-201	preGC-I	TEF-HUMAN.H10MO.D
3.84714e-204	0.576119	0.616	0.443	7.38651e-201	preGC-I	NKX2-2.SwissRegulon
4.60642e-204	0.472624	0.628	0.447	8.84433e-201	preGC-I	TFAP2D.SwissRegulon
1.02754e-203	0.630705	0.621	0.456	1.97287e-200	preGC-I	KLF6-HUMAN.H10MO.D
1.12061e-203	-2.21156	0.299	0.537	2.15158e-200	preGC-I	DLX1-HUMAN.H10MO.D
2.13758e-203	0.636671	0.601	0.429	4.10416e-200	preGC-I	STAT6.HOMER
9.64162e-203	-1.2637	0.327	0.519	1.85119e-199	preGC-I	HOXC4.SwissRegulon
2.94822e-202	-1.48834	0.327	0.497	5.66058e-199	preGC-I	BACH2.SwissRegulon
3.43893e-202	-1.58445	0.307	0.522	6.60274e-199	preGC-I	ALX4.SwissRegulon
1.54372e-201	-0.996178	0.346	0.511	2.96394e-198	preGC-I	TEF.MA0843.1
3.64413e-201	0.827883	0.585	0.438	6.99674e-198	preGC-I	E2F6-HUMAN.H10MO.C
6.20802e-201	0.460576	0.609	0.426	1.19194e-197	preGC-I	TEAD4.SwissRegulon
3.50712e-200	0.42854	0.349	0.514	6.73367e-197	preGC-I	CREB1-HUMAN.H10MO.A
1.29811e-199	0.651401	0.591	0.436	2.49238e-196	preGC-I	FLI1-HUMAN.H10MO.A
6.28625e-199	0.64431	0.601	0.439	1.20696e-195	preGC-I	ZNF692.HOMER
1.82339e-197	-0.750848	0.348	0.502	3.5009e-194	preGC-I	HIC2-HUMAN.H10MO.D
2.76106e-197	-2.4134	0.312	0.47	5.30124e-194	preGC-I	PAX5-HUMAN.H10MO.A
3.00269e-197	0.700613	0.62	0.453	5.76517e-194	preGC-I	GZF1.SwissRegulon
3.28201e-197	0.677348	0.618	0.452	6.30146e-194	preGC-I	E2F7-HUMAN.H10MO.D
3.39311e-197	0.703085	0.599	0.441	6.51477e-194	preGC-I	STAT1.HOMER
3.39562e-197	-1.26847	0.334	0.506	6.51959e-194	preGC-I	BATF-HUMAN.H10MO.S
3.95299e-197	0.275488	0.578	0.412	7.58974e-194	preGC-I	GTF2F1.SwissRegulon
8.70373e-197	0.400732	0.606	0.447	1.67112e-193	preGC-I	TCF7L1.MA1421.1
1.59528e-196	-0.939013	0.34	0.512	3.06294e-193	preGC-I	NKX2-6.SwissRegulon
3.08043e-196	-1.51756	0.604	0.428	5.91443e-193	preGC-I	IRF8.MA0652.1
3.40388e-196	0.865645	0.597	0.441	6.53544e-193	preGC-I	TBR1.SwissRegulon
4.84753e-196	0.621376	0.604	0.44	9.30725e-193	preGC-I	EGR3-HUMAN.H10MO.D
1.3581e-195	0.564753	0.617	0.448	2.60755e-192	preGC-I	FOXB1-HUMAN.H10MO.D
2.18558e-195	-0.695745	0.355	0.512	4.19632e-192	preGC-I	HIC2.MA0738.1
1.22093e-194	-1.05275	0.339	0.515	2.34419e-191	preGC-I	DLX2-HUMAN.H10MO.D
1.71159e-194	-0.947505	0.362	0.521	3.28625e-191	preGC-I	FOSL1::JUND(var.2).MA1143.1
1.80032e-194	0.800831	0.597	0.435	3.45662e-191	preGC-I	SCRT1.MA0743.1
1.79728e-193	-2.07857	0.34	0.506	3.45078e-190	preGC-I	NFKB1.SwissRegulon
2.39236e-192	-1.00555	0.357	0.515	4.59334e-189	preGC-I	ATF7.SwissRegulon
4.8488e-192	-4.99871	0.315	0.472	9.3097e-189	preGC-I	NR1H2::RXRA.MA0115.1
1.25392e-191	-1.20105	0.335	0.511	2.40752e-188	preGC-I	HOXC5.SwissRegulon
5.44969e-191	-1.33018	0.349	0.501	1.04634e-187	preGC-I	CEBPA.SwissRegulon
1.7349e-190	-0.556927	0.647	0.431	3.331e-187	preGC-I	FOXJ3.SwissRegulon
3.11472e-190	0.696967	0.582	0.428	5.98026e-187	preGC-I	PU.1.HOMER
3.6634e-190	-2.93095	0.32	0.465	7.03373e-187	preGC-I	NFE2.SwissRegulon
3.89179e-190	-3.04839	0.321	0.471	7.47223e-187	preGC-I	MEF2B.MA0660.1
1.73312e-188	-0.052745	0.614	0.421	3.32759e-185	preGC-I	NRL.MA0842.1
3.03671e-188	-0.710923	0.345	0.498	5.83049e-185	preGC-I	ZNF382.HOMER
6.16986e-188	-0.838387	0.341	0.503	1.18461e-184	preGC-I	SREBF2.MA0596.1
3.58564e-187	0.327168	0.601	0.435	6.88442e-184	preGC-I	ELF1.SwissRegulon
1.2637e-186	0.728501	0.589	0.447	2.42631e-183	preGC-I	TBX1-HUMAN.H10MO.D
1.61115e-186	0.758053	0.594	0.441	3.09341e-183	preGC-I	MZF1.SwissRegulon
3.23703e-186	0.66872	0.616	0.462	6.21509e-183	preGC-I	E2F1-HUMAN.H10MO.A
3.46856e-186	-0.99574	0.334	0.493	6.65963e-183	preGC-I	BATF-HUMAN.H10MO.A
1.25166e-184	0.575287	0.598	0.434	2.4032e-181	preGC-I	ETV2.SwissRegulon
2.52941e-183	0.6632	0.609	0.449	4.85647e-180	preGC-I	ETV3-HUMAN.H10MO.D
3.38487e-183	0.677427	0.61	0.456	6.49895e-180	preGC-I	ATOH1-HUMAN.H10MO.D
1.67921e-182	-0.909815	0.347	0.495	3.22409e-179	preGC-I	RARA::RXRA.MA0159.1
2.29726e-181	-3.49774	0.314	0.498	4.41075e-178	preGC-I	HXA10-HUMAN.H10MO.C
4.07717e-181	-0.913512	0.337	0.49	7.82817e-178	preGC-I	SOX12.SwissRegulon
6.14334e-181	-0.674765	0.351	0.507	1.17952e-177	preGC-I	PAX8.SwissRegulon
7.24691e-181	-1.98106	0.328	0.478	1.39141e-177	preGC-I	PPARE.HOMER
9.72411e-181	-0.45447	0.611	0.415	1.86703e-177	preGC-I	ARE.HOMER
3.31341e-180	0.660336	0.611	0.453	6.36174e-177	preGC-I	HEY2.MA0649.1
1.74755e-179	-1.50685	0.337	0.512	3.3553e-176	preGC-I	PAX7.MA0680.1
1.89046e-178	-1.5647	0.325	0.529	3.62968e-175	preGC-I	GSX2.SwissRegulon
2.19252e-178	0.240902	0.61	0.432	4.20963e-175	preGC-I	NR2E1.SwissRegulon
6.6336e-178	0.641272	0.612	0.453	1.27365e-174	preGC-I	BATF3-HUMAN.H10MO.D
8.11546e-178	0.5208	0.627	0.468	1.55817e-174	preGC-I	NRF.HOMER
5.33776e-177	-1.02252	0.349	0.505	1.02485e-173	preGC-I	HLF.MA0043.2
6.21309e-177	-1.91482	0.314	0.526	1.19291e-173	preGC-I	LHX8-HUMAN.H10MO.D
9.11386e-177	-0.0101207	0.596	0.435	1.74986e-173	preGC-I	OLIG3.SwissRegulon
4.12192e-176	-0.0847972	0.609	0.412	7.91408e-173	preGC-I	ZN713-HUMAN.H10MO.D
6.23842e-176	-0.740203	0.347	0.502	1.19778e-172	preGC-I	SOX30.SwissRegulon
9.50423e-176	0.548613	0.633	0.468	1.82481e-172	preGC-I	E2F5-HUMAN.H10MO.B
9.50423e-176	0.548613	0.633	0.468	1.82481e-172	preGC-I	E2F5.SwissRegulon
1.9131e-175	-3.49253	0.28	0.423	3.67316e-172	preGC-I	SOX17-HUMAN.H10MO.D
6.73199e-175	-1.38721	0.322	0.52	1.29254e-171	preGC-I	HXA11-HUMAN.H10MO.D
9.05074e-175	-2.42531	0.319	0.483	1.73774e-171	preGC-I	JDP2(var.2).MA0656.1
1.57404e-174	0.507263	0.587	0.428	3.02216e-171	preGC-I	BHLHE22.SwissRegulon
2.57341e-174	-1.15864	0.353	0.507	4.94095e-171	preGC-I	RORA(var.2).MA0072.1
3.27225e-174	-0.831523	0.594	0.413	6.28272e-171	preGC-I	ZNF189.HOMER
4.84896e-174	0.632528	0.599	0.451	9.31001e-171	preGC-I	CENPB-HUMAN.H10MO.D
1.4856e-173	0.742757	0.556	0.428	2.85235e-170	preGC-I	EWSR1-FLI1.MA0149.1
1.61855e-173	0.161018	0.607	0.432	3.10761e-170	preGC-I	SRY.MA0084.1
1.04264e-172	0.619906	0.587	0.439	2.00187e-169	preGC-I	HEY2-HUMAN.H10MO.D
2.02026e-172	-0.161541	0.617	0.456	3.8789e-169	preGC-I	LEF1.MA0768.1
2.93791e-172	0.387807	0.613	0.44	5.64078e-169	preGC-I	GRHL2.HOMER
3.31119e-172	0.681119	0.58	0.433	6.35748e-169	preGC-I	STAT4.HOMER
4.71054e-172	0.551664	0.604	0.445	9.04424e-169	preGC-I	SPDEF-HUMAN.H10MO.D
9.06899e-172	-1.32826	0.332	0.519	1.74125e-168	preGC-I	PROP1-HUMAN.H10MO.D
1.25741e-171	0.659084	0.595	0.445	2.41423e-168	preGC-I	NEUROG2.MA0669.1
1.37069e-171	0.663404	0.59	0.44	2.63172e-168	preGC-I	MTF1.MA0863.1
6.64844e-171	0.642363	0.596	0.453	1.2765e-167	preGC-I	CXXC1-HUMAN.H10MO.D
6.64844e-171	0.642363	0.596	0.453	1.2765e-167	preGC-I	CXXC1.SwissRegulon
8.95216e-171	0.081479	0.586	0.413	1.71881e-167	preGC-I	ID4-HUMAN.H10MO.D
1.50064e-170	-1.22206	0.332	0.487	2.88124e-167	preGC-I	LXRE.HOMER
2.58374e-170	-3.51755	0.279	0.423	4.96077e-167	preGC-I	SOX17.SwissRegulon
4.1098e-170	0.266917	0.572	0.418	7.89082e-167	preGC-I	IRF4-HUMAN.H10MO.C
1.26344e-169	0.717904	0.596	0.448	2.42581e-166	preGC-I	ERF.SwissRegulon
1.30528e-169	0.688263	0.611	0.46	2.50613e-166	preGC-I	FIGLA-HUMAN.H10MO.D
5.95158e-169	-0.866391	0.352	0.51	1.1427e-165	preGC-I	SREBF2.SwissRegulon
1.83784e-168	0.685424	0.588	0.445	3.52865e-165	preGC-I	PKNOX1.SwissRegulon
4.16849e-168	-2.02707	0.351	0.503	8.00351e-165	preGC-I	NFKB1-HUMAN.H10MO.B
7.81147e-168	0.565627	0.582	0.434	1.4998e-164	preGC-I	PRDM1.SwissRegulon
8.46267e-168	-0.769076	0.341	0.501	1.62483e-164	preGC-I	NFIL3-HUMAN.H10MO.C
1.29244e-167	-3.16178	0.305	0.467	2.48148e-164	preGC-I	SMRC1-HUMAN.H10MO.D
2.78677e-167	0.15624	0.618	0.467	5.3506e-164	preGC-I	LEF1-HUMAN.H10MO.C
2.78677e-167	0.15624	0.618	0.467	5.3506e-164	preGC-I	LEF1.SwissRegulon
5.18839e-167	0.603878	0.592	0.448	9.96171e-164	preGC-I	BCL6B-HUMAN.H10MO.D
5.23672e-167	0.596129	0.571	0.423	1.00545e-163	preGC-I	ELF2-HUMAN.H10MO.C
1.87917e-166	-1.76626	0.596	0.407	3.608e-163	preGC-I	MAFK.MAFK-HUMAN.H10MO.S
3.5135e-166	0.552343	0.61	0.455	6.74592e-163	preGC-I	XBP1-HUMAN.H10MO.C
3.79112e-166	0.871668	0.572	0.429	7.27895e-163	preGC-I	STAT5A.SwissRegulon
9.23201e-166	0.575345	0.584	0.441	1.77255e-162	preGC-I	RARG-HUMAN.H10MO.C
4.42062e-165	0.60436	0.616	0.466	8.48759e-162	preGC-I	E2F2.SwissRegulon
3.24191e-164	0.641855	0.603	0.45	6.22446e-161	preGC-I	TFAP2B.SwissRegulon
3.62687e-164	-1.3084	0.34	0.514	6.9636e-161	preGC-I	POU6F1.SwissRegulon
5.22374e-164	0.524685	0.614	0.462	1.00296e-160	preGC-I	MNT.MA0825.1
7.14805e-164	0.477689	0.601	0.443	1.37243e-160	preGC-I	IRF6.SwissRegulon
1.1992e-163	0.135152	0.594	0.425	2.30247e-160	preGC-I	IKZF2.SwissRegulon
1.92677e-163	1.92483	0.554	0.41	3.6994e-160	preGC-I	NFIC::TLX1.MA0119.1
8.88752e-163	0.460152	0.589	0.444	1.7064e-159	preGC-I	THAP1-HUMAN.H10MO.D
1.01368e-162	-7.02961	0.268	0.528	1.94626e-159	preGC-I	HOXB7.SwissRegulon
3.2195e-162	0.767781	0.588	0.444	6.18144e-159	preGC-I	ZEB1-HUMAN.H10MO.B
4.2451e-162	-0.994839	0.589	0.416	8.15059e-159	preGC-I	NF2L2-HUMAN.H10MO.D
8.47388e-162	0.601382	0.595	0.449	1.62698e-158	preGC-I	ARNT::HIF1A.MA0259.1
4.23766e-160	0.581966	0.6	0.459	8.13631e-157	preGC-I	EHF.MA0598.2
2.29313e-159	-0.986084	0.342	0.509	4.40281e-156	preGC-I	RHOXF2.SwissRegulon
7.11367e-159	0.54407	0.609	0.463	1.36583e-155	preGC-I	TFDP1-HUMAN.H10MO.S
1.25356e-158	0.277817	0.59	0.439	2.40684e-155	preGC-I	SPI1.MA0080.4
1.31099e-158	0.776517	0.58	0.44	2.5171e-155	preGC-I	STAT1-HUMAN.H10MO.S
1.62116e-158	0.48787	0.585	0.431	3.11262e-155	preGC-I	ZNF350.SwissRegulon
2.38826e-158	-0.726737	0.36	0.506	4.58546e-155	preGC-I	KLF4.MA0039.3
1.0442e-157	-1.36432	0.314	0.521	2.00487e-154	preGC-I	HOXD11.SwissRegulon
3.20147e-157	0.754662	0.584	0.448	6.14682e-154	preGC-I	EGR4-HUMAN.H10MO.D
8.65488e-157	0.650145	0.598	0.449	1.66174e-153	preGC-I	BHE41-HUMAN.H10MO.D
1.55437e-156	-0.681678	0.359	0.507	2.98438e-153	preGC-I	BBX.SwissRegulon
1.77284e-156	-1.23492	0.344	0.513	3.40386e-153	preGC-I	ALX1-HUMAN.H10MO.B
1.56108e-155	0.531445	0.615	0.46	2.99728e-152	preGC-I	ELK3.SwissRegulon
2.74877e-155	-0.91639	0.573	0.444	5.27763e-152	preGC-I	BHLHA15.SwissRegulon
4.87681e-155	0.682844	0.581	0.442	9.36348e-152	preGC-I	MZF1-HUMAN.H10MO.D
2.31754e-154	-3.65052	0.288	0.53	4.44968e-151	preGC-I	HXB8-HUMAN.H10MO.C
2.31754e-154	-3.65052	0.288	0.53	4.44968e-151	preGC-I	HOXB8.SwissRegulon
3.10861e-154	0.427033	0.6	0.447	5.96854e-151	preGC-I	ONECUT2.MA0756.1
4.35838e-154	-1.40097	0.334	0.481	8.36808e-151	preGC-I	THA-HUMAN.H10MO.S
1.70366e-153	0.528288	0.602	0.455	3.27102e-150	preGC-I	ZIC3.MA0697.1
2.60698e-153	-1.05106	0.341	0.511	5.0054e-150	preGC-I	LMX1B-HUMAN.H10MO.D
5.71253e-153	-0.0241949	0.585	0.433	1.09681e-149	preGC-I	NFATC3.SwissRegulon
6.71951e-153	0.399482	0.586	0.432	1.29015e-149	preGC-I	SPI1-HUMAN.H10MO.A
1.77337e-152	-0.654781	0.366	0.505	3.40487e-149	preGC-I	ONEC3-HUMAN.H10MO.D
2.14406e-152	-2.10854	0.348	0.491	4.1166e-149	preGC-I	CEBPB-HUMAN.H10MO.A
2.9174e-152	-1.31238	0.349	0.503	5.60141e-149	preGC-I	BATF.SwissRegulon
3.0134e-152	-12.9676	0.176	0.343	5.78572e-149	preGC-I	SOX15-HUMAN.H10MO.D
3.0134e-152	-12.9676	0.176	0.343	5.78572e-149	preGC-I	SOX15.SwissRegulon
4.05589e-152	-1.18746	0.339	0.489	7.7873e-149	preGC-I	THRA.SwissRegulon
2.23068e-151	-0.481794	0.593	0.402	4.2829e-148	preGC-I	TBL1XR1.SwissRegulon
3.35097e-151	-6.27357	0.277	0.524	6.43387e-148	preGC-I	HXB7-HUMAN.H10MO.C
5.00669e-151	-5.21374	0.356	0.494	9.61285e-148	preGC-I	CEBPE.MA0837.1
4.08453e-150	-1.04491	0.367	0.504	7.84229e-147	preGC-I	CEBPE.SwissRegulon
4.21775e-150	-1.61387	0.345	0.512	8.09808e-147	preGC-I	HXB6-HUMAN.H10MO.D
6.79309e-150	0.580906	0.584	0.435	1.30427e-146	preGC-I	ETV4-HUMAN.H10MO.B
6.79309e-150	0.580906	0.584	0.435	1.30427e-146	preGC-I	ETV4.SwissRegulon
1.23878e-149	-1.59465	0.319	0.513	2.37846e-146	preGC-I	DLX1.SwissRegulon
3.74894e-149	-2.67855	0.607	0.443	7.19797e-146	preGC-I	SNAI2.MA0745.1
4.51817e-149	-0.83328	0.353	0.497	8.67488e-146	preGC-I	NF2L1-HUMAN.H10MO.C
4.51817e-149	-0.83328	0.353	0.497	8.67488e-146	preGC-I	NFE2L1.SwissRegulon
4.73924e-148	-4.39496	0.329	0.47	9.09934e-145	preGC-I	NR1H2-HUMAN.H10MO.D
8.16577e-148	0.334296	0.58	0.426	1.56783e-144	preGC-I	IRF1-HUMAN.H10MO.A
5.7641e-147	0.516907	0.585	0.441	1.10671e-143	preGC-I	EHF.SwissRegulon
1.01019e-146	0.614412	0.59	0.457	1.93957e-143	preGC-I	MZF1(var.2).MA0057.1
2.84394e-146	0.625964	0.585	0.447	5.46037e-143	preGC-I	PAX3.SwissRegulon
4.37491e-146	0.564585	0.59	0.446	8.39982e-143	preGC-I	MNT.SwissRegulon
5.13925e-146	0.593532	0.594	0.45	9.86737e-143	preGC-I	PBX3-HUMAN.H10MO.B
7.7452e-146	0.45001	0.594	0.442	1.48708e-142	preGC-I	ONECUT1.MA0679.1
9.77468e-146	0.43991	0.587	0.444	1.87674e-142	preGC-I	ELF5.MA0136.2
1.12264e-145	0.174721	0.581	0.435	2.15548e-142	preGC-I	GABPA-HUMAN.H10MO.A
1.38636e-145	-0.971993	0.354	0.511	2.66181e-142	preGC-I	LHX1.SwissRegulon
1.7227e-145	-6.09337	0.314	0.461	3.30758e-142	preGC-I	NR6A1.SwissRegulon
3.27639e-145	-1.20458	0.288	0.568	6.29066e-142	preGC-I	PRRX2.SwissRegulon
8.10734e-145	0.541564	0.589	0.447	1.55661e-141	preGC-I	MTF1-HUMAN.H10MO.C
8.27672e-145	-1.28861	0.352	0.51	1.58913e-141	preGC-I	LHX9.SwissRegulon
8.50315e-145	0.595376	0.609	0.466	1.63261e-141	preGC-I	ELK4-HUMAN.H10MO.A
3.85454e-144	0.626765	0.566	0.432	7.40071e-141	preGC-I	MEIS3-HUMAN.H10MO.D
4.13856e-144	-0.76639	0.368	0.509	7.94604e-141	preGC-I	DBP.MA0639.1
3.14809e-143	0.12316	0.598	0.427	6.04434e-140	preGC-I	FOXG1-HUMAN.H10MO.D
3.20892e-143	-0.820613	0.354	0.492	6.16113e-140	preGC-I	TEF.SwissRegulon
4.22578e-143	0.536027	0.603	0.454	8.11349e-140	preGC-I	TFCP2.MA0145.3
1.11775e-142	0.487396	0.582	0.441	2.14607e-139	preGC-I	EHF-HUMAN.H10MO.S
2.07634e-142	-3.29401	0.357	0.487	3.98657e-139	preGC-I	CEBPA.MA0102.3
5.31373e-142	-0.739254	0.36	0.494	1.02024e-138	preGC-I	RHOXF1.SwissRegulon
1.20768e-141	0.579652	0.578	0.445	2.31874e-138	preGC-I	PLAGL1.SwissRegulon
1.90073e-141	0.539236	0.576	0.449	3.64939e-138	preGC-I	KLF15-HUMAN.H10MO.D
1.90073e-141	0.539236	0.576	0.449	3.64939e-138	preGC-I	KLF15.SwissRegulon
2.56396e-141	-11.8075	0.206	0.351	4.9228e-138	preGC-I	SOX9.SwissRegulon
2.67068e-141	-0.935034	0.366	0.526	5.12771e-138	preGC-I	HME2-HUMAN.H10MO.D
5.28818e-141	0.172771	0.602	0.438	1.01533e-137	preGC-I	FOXC2-HUMAN.H10MO.D
8.48378e-141	-0.698015	0.363	0.498	1.62889e-137	preGC-I	HXD13-HUMAN.H10MO.D
1.25378e-140	-4.63956	0.371	0.493	2.40727e-137	preGC-I	CEBPG.MA0838.1
2.22356e-140	-0.0684071	0.566	0.42	4.26924e-137	preGC-I	TEAD4-HUMAN.H10MO.A
4.32571e-139	0.419055	0.6	0.458	8.30537e-136	preGC-I	POU5F1B.MA0792.1
3.1349e-138	-1.06999	0.352	0.511	6.01901e-135	preGC-I	BARX1-HUMAN.H10MO.D
8.24996e-138	0.604243	0.582	0.446	1.58399e-134	preGC-I	TBX15.SwissRegulon
4.34514e-136	0.148307	0.568	0.427	8.34267e-133	preGC-I	TCF7L2.SwissRegulon
1.38934e-135	-1.40862	0.347	0.516	2.66754e-132	preGC-I	BARX1.SwissRegulon
3.19767e-135	0.495811	0.584	0.448	6.13952e-132	preGC-I	NKX22-HUMAN.H10MO.D
2.24502e-134	0.583316	0.582	0.442	4.31044e-131	preGC-I	GFI1B-HUMAN.H10MO.C
3.73502e-134	0.4028	0.566	0.436	7.17124e-131	preGC-I	SP2-HUMAN.H10MO.C
4.10991e-134	0.559634	0.59	0.458	7.89103e-131	preGC-I	XBP1.MA0844.1
5.72763e-134	-4.70792	0.328	0.463	1.0997e-130	preGC-I	HNF4G-HUMAN.H10MO.C
1.93675e-133	0.477366	0.602	0.463	3.71857e-130	preGC-I	REST.SwissRegulon
3.9623e-133	0.182175	0.59	0.433	7.60762e-130	preGC-I	SPIC.MA0687.1
4.53535e-133	0.0464044	0.598	0.438	8.70787e-130	preGC-I	MAX.MAX.SwissRegulon
5.56454e-132	0.469385	0.606	0.47	1.06839e-128	preGC-I	E2F2-HUMAN.H10MO.B
7.9145e-132	-0.588041	0.408	0.537	1.51958e-128	preGC-I	KLF14.MA0740.1
1.64457e-131	0.572611	0.598	0.466	3.15757e-128	preGC-I	E2F7.MA0758.1
4.49315e-131	0.337	0.576	0.437	8.62684e-128	preGC-I	RBPJ.SwissRegulon
6.65197e-131	-0.137185	0.578	0.41	1.27718e-127	preGC-I	EZH2.SwissRegulon
1.48698e-130	0.512942	0.567	0.436	2.855e-127	preGC-I	PU.1-IRF.HOMER
1.64838e-130	0.55602	0.591	0.451	3.16489e-127	preGC-I	ZN524-HUMAN.H10MO.D
4.12893e-130	0.484368	0.592	0.466	7.92755e-127	preGC-I	ZBTB7C.SwissRegulon
8.24403e-130	0.0415158	0.578	0.411	1.58285e-126	preGC-I	BC11A-HUMAN.H10MO.C
8.30637e-130	-1.4125	0.626	0.433	1.59482e-126	preGC-I	FOXJ2.SwissRegulon
1.31117e-129	0.607272	0.547	0.427	2.51745e-126	preGC-I	TFAP2A.SwissRegulon
4.5799e-129	-1.82352	0.338	0.459	8.79342e-126	preGC-I	GATA6-HUMAN.H10MO.B
1.2564e-128	0.482848	0.592	0.458	2.41228e-125	preGC-I	TFCP2.SwissRegulon
1.57222e-128	0.445251	0.567	0.45	3.01865e-125	preGC-I	EGR1-HUMAN.H10MO.S
2.38972e-128	0.514742	0.581	0.441	4.58827e-125	preGC-I	CHR.HOMER
2.55543e-128	0.476488	0.604	0.469	4.90643e-125	preGC-I	YY2.SwissRegulon
7.71075e-128	0.446726	0.584	0.445	1.48046e-124	preGC-I	POU2F2.SwissRegulon
1.96711e-127	0.577999	0.58	0.448	3.77685e-124	preGC-I	TFAP2C(var.3).MA0815.1
6.48916e-127	-0.658831	0.372	0.505	1.24592e-123	preGC-I	HOXD12.SwissRegulon
8.96413e-127	0.601075	0.576	0.446	1.72111e-123	preGC-I	E2F1.HOMER
1.4804e-126	-1.53099	0.568	0.442	2.84236e-123	preGC-I	BHE22-HUMAN.H10MO.D
4.42258e-126	0.2658	0.574	0.439	8.49136e-123	preGC-I	GABPA.SwissRegulon
5.66063e-126	0.39733	0.581	0.445	1.08684e-122	preGC-I	GLI3-HUMAN.H10MO.B
6.24644e-126	0.490894	0.589	0.459	1.19932e-122	preGC-I	REST-NRSF.HOMER
1.11734e-125	0.434359	0.591	0.452	2.14529e-122	preGC-I	MAX.MA0058.3
5.38884e-125	-2.54381	0.322	0.449	1.03466e-121	preGC-I	ERR1-HUMAN.H10MO.D
7.15191e-125	0.574594	0.571	0.446	1.37317e-121	preGC-I	TFAP2A(var.3).MA0872.1
7.76283e-125	0.483499	0.579	0.457	1.49046e-121	preGC-I	ZSCAN4.SwissRegulon
9.15348e-125	0.464639	0.572	0.448	1.75747e-121	preGC-I	E2F8.SwissRegulon
1.02041e-124	0.513016	0.569	0.448	1.95919e-121	preGC-I	WT1.SwissRegulon
1.21931e-124	-0.750516	0.367	0.517	2.34107e-121	preGC-I	HOXC13.SwissRegulon
5.63251e-124	0.507914	0.589	0.461	1.08144e-120	preGC-I	DDIT3-HUMAN.H10MO.C
1.61503e-123	0.424686	0.588	0.454	3.10086e-120	preGC-I	MAX::MYC.MA0059.1
1.67017e-123	0.478075	0.578	0.453	3.20672e-120	preGC-I	PO3F1-HUMAN.H10MO.C
1.73875e-123	0.34873	0.595	0.462	3.3384e-120	preGC-I	CDC5L.SwissRegulon
2.16016e-123	0.633122	0.572	0.455	4.14751e-120	preGC-I	CR3L1-HUMAN.H10MO.D
4.31587e-123	0.659767	0.569	0.445	8.28647e-120	preGC-I	TFE3-HUMAN.H10MO.C
4.31587e-123	0.659767	0.569	0.445	8.28647e-120	preGC-I	TFE3.SwissRegulon
1.18914e-122	0.458541	0.595	0.458	2.28315e-119	preGC-I	TBP-HUMAN.H10MO.C
2.36038e-122	-1.36578	0.339	0.467	4.53194e-119	preGC-I	IRF:BATF.HOMER
3.37594e-122	0.414207	0.572	0.444	6.4818e-119	preGC-I	SPIC.SwissRegulon
5.0853e-122	0.478071	0.602	0.467	9.76377e-119	preGC-I	E2F4.HOMER
5.44904e-122	-2.40818	0.344	0.458	1.04622e-118	preGC-I	MEF2A.SwissRegulon
1.09761e-121	-1.27195	0.352	0.522	2.10741e-118	preGC-I	LHX5.SwissRegulon
4.08372e-121	0.425308	0.578	0.444	7.84075e-118	preGC-I	ELK3-HUMAN.H10MO.D
1.88193e-120	0.306604	0.585	0.445	3.61331e-117	preGC-I	ONECUT3.MA0757.1
2.12693e-120	-0.490326	0.601	0.42	4.0837e-117	preGC-I	GATA:SCL.HOMER
2.24017e-120	0.364278	0.567	0.438	4.30113e-117	preGC-I	ZN350-HUMAN.H10MO.C
3.32956e-120	-3.57755	0.311	0.547	6.39276e-117	preGC-I	ISL2.MA0914.1
3.35525e-120	0.411472	0.576	0.455	6.44209e-117	preGC-I	SP2.MA0516.1
7.00743e-120	0.432059	0.562	0.428	1.34543e-116	preGC-I	ID4.SwissRegulon
2.71667e-118	-1.16539	0.618	0.434	5.21601e-115	preGC-I	FOXJ3-HUMAN.H10MO.A
2.73364e-118	-0.551222	0.378	0.499	5.2486e-115	preGC-I	SIX1.SwissRegulon
3.16035e-118	0.456951	0.582	0.45	6.06786e-115	preGC-I	TEAD3-HUMAN.H10MO.D
3.50866e-118	-4.33636	0.374	0.492	6.73662e-115	preGC-I	CEBPD.MA0836.1
9.79061e-118	0.566245	0.559	0.45	1.8798e-114	preGC-I	ZNF263.SwissRegulon
1.51719e-117	0.465646	0.584	0.448	2.913e-114	preGC-I	GRHL1.MA0647.1
3.25814e-117	0.551099	0.584	0.453	6.25562e-114	preGC-I	FOXH1.MA0479.1
2.65467e-116	-4.39833	0.372	0.489	5.09696e-113	preGC-I	CEBPB.MA0466.2
1.28053e-115	-0.347691	0.579	0.428	2.45861e-112	preGC-I	NFATC3.MA0625.1
1.70601e-115	-0.542784	0.373	0.499	3.27554e-112	preGC-I	SIX3.SwissRegulon
2.43578e-115	-1.07433	0.364	0.511	4.6767e-112	preGC-I	PHOX2B.SwissRegulon
4.09267e-115	0.400685	0.574	0.447	7.85792e-112	preGC-I	MAX.MAX-HUMAN.H10MO.A
4.09868e-115	-1.08135	0.372	0.52	7.86946e-112	preGC-I	TLX2.SwissRegulon
7.5064e-115	-2.64199	0.32	0.543	1.44123e-111	preGC-I	HOXC10.SwissRegulon
1.07242e-114	0.377343	0.573	0.441	2.05905e-111	preGC-I	ZNF274.SwissRegulon
1.21217e-114	-2.55298	0.368	0.488	2.32737e-111	preGC-I	JUN::JUNB(var.2).MA1133.1
1.26976e-114	-1.50585	0.601	0.421	2.43795e-111	preGC-I	SOX9-HUMAN.H10MO.B
7.98443e-114	0.561555	0.58	0.448	1.53301e-110	preGC-I	TBX1.MA0805.1
2.65415e-113	0.561532	0.564	0.444	5.09597e-110	preGC-I	HEN1-HUMAN.H10MO.C
3.63342e-113	0.478263	0.575	0.442	6.97617e-110	preGC-I	GRHL1-HUMAN.H10MO.D
4.0709e-113	0.378816	0.568	0.44	7.81613e-110	preGC-I	BCL6-HUMAN.H10MO.C
5.12639e-113	0.254763	0.557	0.438	9.84268e-110	preGC-I	ETS1.HOMER
1.20466e-112	0.600618	0.56	0.455	2.31295e-109	preGC-I	PLAG1-HUMAN.H10MO.D
3.02079e-112	0.448289	0.58	0.461	5.79992e-109	preGC-I	PRDM4-HUMAN.H10MO.D
3.57939e-112	0.52332	0.58	0.458	6.87243e-109	preGC-I	USF2-HUMAN.H10MO.A
5.92666e-112	0.519935	0.575	0.454	1.13792e-108	preGC-I	MYBA-HUMAN.H10MO.D
8.14366e-112	0.613919	0.565	0.444	1.56358e-108	preGC-I	ELF1-HUMAN.H10MO.A
1.34628e-111	-0.566277	0.383	0.513	2.58486e-108	preGC-I	HXA1-HUMAN.H10MO.C
2.2763e-111	0.570959	0.585	0.456	4.37049e-108	preGC-I	TBX4.MA0806.1
2.2763e-111	0.570959	0.585	0.456	4.37049e-108	preGC-I	TBX5.MA0807.1
2.2763e-111	0.570959	0.585	0.456	4.37049e-108	preGC-I	TBX5.SwissRegulon
1.42614e-110	0.516937	0.569	0.461	2.73819e-107	preGC-I	ZBTB7A.MA0750.2
1.61477e-110	0.584396	0.576	0.454	3.10036e-107	preGC-I	TBX1.SwissRegulon
2.97312e-110	0.360426	0.575	0.45	5.70839e-107	preGC-I	HOMEZ.SwissRegulon
3.98607e-110	-0.643607	0.384	0.508	7.65325e-107	preGC-I	HMGA2.SwissRegulon
5.44371e-110	-0.356245	0.589	0.435	1.04519e-106	preGC-I	FOXD2-HUMAN.H10MO.D
1.26108e-108	0.285696	0.557	0.419	2.42128e-105	preGC-I	SOX18-HUMAN.H10MO.D
1.93576e-108	0.607593	0.548	0.436	3.71666e-105	preGC-I	EP300.SwissRegulon
9.90119e-108	0.598838	0.57	0.451	1.90103e-104	preGC-I	HMX1.SwissRegulon
1.65724e-107	0.37223	0.568	0.452	3.18191e-104	preGC-I	FEV.SwissRegulon
2.64888e-107	0.411413	0.547	0.436	5.08585e-104	preGC-I	SP3-HUMAN.H10MO.B
2.64888e-107	0.411413	0.547	0.436	5.08585e-104	preGC-I	SP3.SwissRegulon
4.45933e-107	0.439417	0.578	0.461	8.56191e-104	preGC-I	TF7L1-HUMAN.H10MO.D
9.68327e-107	0.48571	0.576	0.454	1.85919e-103	preGC-I	TBX4-HUMAN.H10MO.D
1.02494e-106	0.426137	0.585	0.477	1.96788e-103	preGC-I	RFX3.MA0798.1
1.60008e-106	-0.751419	0.374	0.504	3.07215e-103	preGC-I	DLX4.SwissRegulon
3.05578e-106	-0.903001	0.365	0.478	5.8671e-103	preGC-I	THB-HUMAN.H10MO.C
3.50545e-106	0.6059	0.559	0.446	6.73047e-103	preGC-I	HAND1-HUMAN.H10MO.D
4.12915e-106	-0.995356	0.37	0.51	7.92797e-103	preGC-I	HOXC12.SwissRegulon
5.60182e-106	0.538451	0.56	0.433	1.07555e-102	preGC-I	PRDM9.HOMER
1.08549e-105	-0.837855	0.385	0.52	2.08414e-102	preGC-I	NKX1-1.SwissRegulon
1.24464e-105	0.477636	0.574	0.46	2.3897e-102	preGC-I	ELK4.MA0076.2
1.82374e-105	0.543376	0.565	0.452	3.50157e-102	preGC-I	SCRT2-HUMAN.H10MO.D
3.25707e-105	-0.572046	0.371	0.491	6.25357e-102	preGC-I	HBP1.SwissRegulon
6.73052e-105	0.460464	0.581	0.466	1.29226e-101	preGC-I	MGAP-HUMAN.H10MO.D
9.29793e-105	-2.55138	0.36	0.472	1.7852e-101	preGC-I	MEF2D.MA0773.1
1.09349e-104	0.37162	0.588	0.481	2.0995e-101	preGC-I	RFX5.MA0510.2
1.467e-104	-3.53665	0.318	0.546	2.81664e-101	preGC-I	HXB13-HUMAN.H10MO.D
2.23647e-104	-0.501134	0.386	0.511	4.29402e-101	preGC-I	ZNF410.MA0752.1
2.28978e-104	-0.443944	0.378	0.494	4.39638e-101	preGC-I	RAR:RXR.HOMER
2.76469e-104	0.477065	0.577	0.459	5.30821e-101	preGC-I	MLXIPL.SwissRegulon
7.99056e-104	-0.88107	0.363	0.508	1.53419e-100	preGC-I	PBX1-HUMAN.H10MO.B
3.5669e-103	-2.48051	0.363	0.472	6.84846e-100	preGC-I	MEF2A.MA0052.3
4.79099e-103	0.453463	0.569	0.453	9.19871e-100	preGC-I	RELB.MA1117.1
1.13939e-102	0.590908	0.547	0.435	2.18763e-99	preGC-I	STAT5.HOMER
1.8682e-102	0.401577	0.583	0.457	3.58694e-99	preGC-I	MYCN.MA0104.4
2.80456e-102	-0.714808	0.371	0.486	5.38476e-99	preGC-I	ZNF711.HOMER
9.6549e-102	0.386063	0.573	0.448	1.85374e-98	preGC-I	SOX2-HUMAN.H10MO.B
1.12315e-101	-0.912919	0.36	0.476	2.15645e-98	preGC-I	MYB.HOMER
2.22558e-101	0.510789	0.576	0.458	4.27312e-98	preGC-I	E2F8.MA0865.1
2.92374e-101	-1.12952	0.374	0.494	5.61359e-98	preGC-I	RORG-HUMAN.H10MO.C
6.51736e-101	0.432066	0.568	0.445	1.25133e-97	preGC-I	ZIC1.SwissRegulon
6.62661e-101	-0.376032	0.56	0.415	1.27231e-97	preGC-I	MECOM.SwissRegulon
7.46547e-101	0.433382	0.586	0.467	1.43337e-97	preGC-I	ZBTB4-HUMAN.H10MO.S
9.91897e-101	0.431206	0.584	0.476	1.90444e-97	preGC-I	RFX4-HUMAN.H10MO.D
1.05661e-100	-1.87295	0.358	0.536	2.0287e-97	preGC-I	HMX3-HUMAN.H10MO.D
2.63239e-100	0.397427	0.576	0.463	5.0542e-97	preGC-I	SPDEF.SwissRegulon
4.42028e-100	-1.06394	0.375	0.511	8.48693e-97	preGC-I	NANOG-HUMAN.H10MO.S
6.47502e-100	0.261281	0.564	0.441	1.2432e-96	preGC-I	IRF9-HUMAN.H10MO.C
1.0354e-99	0.450544	0.569	0.45	1.98798e-96	preGC-I	ZNF143.SwissRegulon
1.18827e-99	-2.26582	0.367	0.469	2.28149e-96	preGC-I	MEF2C.SwissRegulon
1.66022e-99	-1.44565	0.354	0.513	3.18763e-96	preGC-I	HOXC9.SwissRegulon
2.35774e-99	-1.31683	0.361	0.521	4.52687e-96	preGC-I	BARH2-HUMAN.H10MO.D
2.76551e-99	0.484782	0.556	0.45	5.30977e-96	preGC-I	GTF2I.SwissRegulon
1.37457e-98	0.578467	0.552	0.438	2.63918e-95	preGC-I	TGIF1.SwissRegulon
1.40841e-98	-1.43475	0.356	0.469	2.70415e-95	preGC-I	RXRB-HUMAN.H10MO.C
1.40841e-98	-1.43475	0.356	0.469	2.70415e-95	preGC-I	RXRB.SwissRegulon
1.63172e-98	-9.98771	0.243	0.354	3.1329e-95	preGC-I	SOX3.SwissRegulon
1.77857e-98	-0.476436	0.391	0.504	3.41485e-95	preGC-I	ZN410-HUMAN.H10MO.D
2.12741e-98	0.200188	0.557	0.457	4.08463e-95	preGC-I	SP1.MA0079.3
4.21058e-98	0.448122	0.559	0.449	8.08432e-95	preGC-I	WT1-HUMAN.H10MO.D
6.90659e-98	-0.65726	0.389	0.512	1.32607e-94	preGC-I	HMGA2-HUMAN.H10MO.D
1.02403e-97	0.357902	0.592	0.476	1.96614e-94	preGC-I	SP100.SwissRegulon
2.60504e-97	0.294153	0.576	0.455	5.00168e-94	preGC-I	ZFX.SwissRegulon
5.12166e-97	0.395679	0.542	0.441	9.83358e-94	preGC-I	EHF-HUMAN.H10MO.C
1.30578e-96	0.355771	0.561	0.442	2.5071e-93	preGC-I	SPDEF.HOMER
1.02333e-95	-0.366975	0.394	0.503	1.9648e-92	preGC-I	HIC1-HUMAN.H10MO.C
3.02075e-95	0.372966	0.565	0.445	5.79984e-92	preGC-I	GFI1B.SwissRegulon
2.40897e-94	-0.919802	0.369	0.487	4.62523e-91	preGC-I	THRB.SwissRegulon
4.56258e-94	-0.508355	0.382	0.488	8.76016e-91	preGC-I	KLF8-HUMAN.H10MO.C
4.56258e-94	-0.508355	0.382	0.488	8.76016e-91	preGC-I	KLF8.SwissRegulon
2.10177e-93	-0.956581	0.384	0.493	4.03539e-90	preGC-I	RORC.SwissRegulon
2.2668e-93	-1.77836	0.347	0.495	4.35225e-90	preGC-I	PO3F2-HUMAN.H10MO.D
2.43697e-93	0.554341	0.555	0.447	4.67898e-90	preGC-I	TFAP2B(var.3).MA0813.1
4.23581e-93	0.725704	0.567	0.46	8.13276e-90	preGC-I	SNAI2-HUMAN.H10MO.C
6.79176e-93	1.03041	0.521	0.416	1.30402e-89	preGC-I	NFIC.SwissRegulon
9.54295e-93	0.533754	0.577	0.466	1.83225e-89	preGC-I	ARNT-HUMAN.H10MO.B
1.49702e-92	0.36813	0.576	0.463	2.87428e-89	preGC-I	ZBTB7A.SwissRegulon
2.76111e-92	-0.520293	0.382	0.493	5.30133e-89	preGC-I	SIX2.SwissRegulon
3.86625e-92	-1.49823	0.349	0.533	7.4232e-89	preGC-I	HOXD13.MA0909.1
6.71739e-92	-2.82246	0.355	0.462	1.28974e-88	preGC-I	TR4.HOMER
1.11786e-91	0.565819	0.558	0.45	2.14629e-88	preGC-I	ETS2-HUMAN.H10MO.C
1.21279e-91	0.458036	0.551	0.435	2.32856e-88	preGC-I	P63-HUMAN.H10MO.S
1.63507e-91	-0.375708	0.582	0.422	3.13933e-88	preGC-I	IRF2.HOMER
3.19846e-91	0.337389	0.56	0.445	6.14105e-88	preGC-I	HOXB13.HOMER
5.83533e-91	-5.76001	0.355	0.467	1.12038e-87	preGC-I	COUP-TFII.HOMER
8.89687e-91	0.483477	0.567	0.449	1.7082e-87	preGC-I	TP53.SwissRegulon
1.23914e-90	0.283923	0.57	0.455	2.37914e-87	preGC-I	ELF1.HOMER
1.23914e-90	0.283923	0.57	0.455	2.37914e-87	preGC-I	ETS.HOMER
1.23914e-90	0.283923	0.57	0.455	2.37914e-87	preGC-I	ETV1.HOMER
1.23914e-90	0.283923	0.57	0.455	2.37914e-87	preGC-I	GABPA.HOMER
1.55133e-90	0.486784	0.565	0.451	2.97856e-87	preGC-I	HSFY2.SwissRegulon
3.44122e-90	0.484692	0.541	0.452	6.60713e-87	preGC-I	SRBP2-HUMAN.H10MO.B
2.22211e-89	0.477087	0.571	0.466	4.26645e-86	preGC-I	ETV6-HUMAN.H10MO.D
4.64418e-89	0.474694	0.57	0.46	8.91682e-86	preGC-I	ZBTB49.SwissRegulon
1.42046e-88	-0.501154	0.389	0.499	2.72728e-85	preGC-I	CDC5L-HUMAN.H10MO.D
2.16078e-88	0.424302	0.553	0.453	4.1487e-85	preGC-I	AP2B-HUMAN.H10MO.B
2.95754e-88	0.503604	0.558	0.446	5.67848e-85	preGC-I	P73-HUMAN.H10MO.S
2.95754e-88	0.503604	0.558	0.446	5.67848e-85	preGC-I	TP73.SwissRegulon
3.4237e-88	-0.779367	0.383	0.503	6.5735e-85	preGC-I	NKX3-1.SwissRegulon
6.03919e-88	0.474783	0.571	0.466	1.15952e-84	preGC-I	ELF3.MA0640.1
4.515e-87	0.317399	0.549	0.435	8.6688e-84	preGC-I	NGN2-HUMAN.H10MO.D
4.79908e-87	-0.390055	0.402	0.498	9.21424e-84	preGC-I	KLF1-HUMAN.H10MO.C
1.50314e-86	0.141912	0.539	0.429	2.88602e-83	preGC-I	RBPJ.MA1116.1
1.80986e-86	0.428364	0.561	0.452	3.47493e-83	preGC-I	ETV7-HUMAN.H10MO.D
2.09223e-86	0.329442	0.573	0.48	4.01709e-83	preGC-I	RFX2.MA0600.2
3.48882e-86	-0.390604	0.395	0.509	6.69853e-83	preGC-I	SP8.MA0747.1
5.68054e-86	-1.28107	0.374	0.519	1.09066e-82	preGC-I	HXC11-HUMAN.H10MO.D
8.31425e-86	-0.606014	0.381	0.495	1.59634e-82	preGC-I	CEBPG-HUMAN.H10MO.C
8.31425e-86	-0.606014	0.381	0.495	1.59634e-82	preGC-I	CEBPG.SwissRegulon
2.17462e-85	-0.695053	0.39	0.503	4.17528e-82	preGC-I	NKX3-2.MA0122.2
2.20058e-85	0.442743	0.565	0.458	4.22511e-82	preGC-I	MLXPL-HUMAN.H10MO.D
9.50437e-85	0.519415	0.552	0.45	1.82484e-81	preGC-I	MAFA.MAFA-HUMAN.H10MO.D
2.09268e-84	0.437199	0.582	0.471	4.01795e-81	preGC-I	CREB3-HUMAN.H10MO.D
2.26077e-84	-0.803211	0.399	0.516	4.34067e-81	preGC-I	NOBOX.SwissRegulon
2.42619e-84	0.417449	0.568	0.459	4.65828e-81	preGC-I	ETV5.SwissRegulon
5.29415e-84	-1.42942	0.37	0.527	1.01648e-80	preGC-I	HOXD13.HOMER
6.0446e-84	-1.21079	0.38	0.482	1.16056e-80	preGC-I	CEBPA-HUMAN.H10MO.A
6.42267e-84	0.26703	0.571	0.456	1.23315e-80	preGC-I	MLX-HUMAN.H10MO.D
9.36859e-84	0.438605	0.549	0.444	1.79877e-80	preGC-I	IRF8-HUMAN.H10MO.D
2.99836e-83	0.403306	0.576	0.467	5.75684e-80	preGC-I	GCM2.MA0767.1
5.62239e-83	0.379659	0.581	0.472	1.0795e-79	preGC-I	E2F3-HUMAN.H10MO.B
1.22379e-82	-1.24768	0.367	0.472	2.34967e-79	preGC-I	ATF2.SwissRegulon
1.28509e-82	0.408254	0.528	0.437	2.46738e-79	preGC-I	MZF1.MA0056.1
4.61133e-82	0.306591	0.53	0.438	8.85375e-79	preGC-I	ZNF263.MA0528.1
5.50382e-82	0.470323	0.561	0.46	1.05673e-78	preGC-I	BCL6B.MA0731.1
5.90972e-82	0.337441	0.559	0.453	1.13467e-78	preGC-I	GFI1-HUMAN.H10MO.C
7.74029e-82	0.322366	0.557	0.452	1.48613e-78	preGC-I	ZNF143-STAF.HOMER
1.06112e-81	-0.503736	0.396	0.501	2.03736e-78	preGC-I	OTX1-HUMAN.H10MO.D
1.93888e-81	0.529043	0.552	0.452	3.72266e-78	preGC-I	ETS2.SwissRegulon
2.03511e-81	-0.98216	0.562	0.417	3.90741e-78	preGC-I	PGR.HOMER
3.20622e-81	-0.548812	0.392	0.499	6.15594e-78	preGC-I	CRX.HOMER
5.05652e-81	0.359807	0.576	0.464	9.70852e-78	preGC-I	SREBF2(var.2).MA0828.1
5.17105e-81	0.504012	0.557	0.457	9.92842e-78	preGC-I	HEY1.SwissRegulon
2.09432e-80	0.386827	0.554	0.456	4.0211e-77	preGC-I	NANOG.SwissRegulon
8.07383e-80	0.353284	0.55	0.445	1.55018e-76	preGC-I	TFAP2B(var.2).MA0812.1
1.66174e-79	-0.834551	0.384	0.51	3.19053e-76	preGC-I	POU3F3.MA0788.1
1.82231e-79	-0.799271	0.574	0.425	3.49884e-76	preGC-I	STAT2.SwissRegulon
2.34999e-79	-0.646948	0.392	0.497	4.51198e-76	preGC-I	ATF4.SwissRegulon
6.55644e-79	0.4295	0.553	0.452	1.25884e-75	preGC-I	PLAL1-HUMAN.H10MO.D
9.24032e-79	0.474657	0.556	0.451	1.77414e-75	preGC-I	STAT3.SwissRegulon
9.35353e-79	0.170495	0.544	0.426	1.79588e-75	preGC-I	SOX18.SwissRegulon
1.63909e-78	-0.854567	0.39	0.488	3.14705e-75	preGC-I	IRX6.SwissRegulon
2.49172e-78	0.403521	0.566	0.47	4.7841e-75	preGC-I	ZBTB4.SwissRegulon
2.49181e-78	0.586593	0.55	0.461	4.78428e-75	preGC-I	TBR1.MA0802.1
8.96237e-78	0.348593	0.551	0.469	1.72078e-74	preGC-I	KLF16-HUMAN.H10MO.D
1.08779e-77	0.384557	0.551	0.445	2.08855e-74	preGC-I	STAT1.SwissRegulon
9.32492e-77	0.303948	0.542	0.439	1.79038e-73	preGC-I	PRDM1.HOMER
1.26557e-76	-1.52051	0.365	0.472	2.4299e-73	preGC-I	ATF2-HUMAN.H10MO.B
2.07e-76	0.396077	0.565	0.458	3.9744e-73	preGC-I	ETV6.MA0645.1
3.50111e-76	0.202565	0.568	0.46	6.72213e-73	preGC-I	HINFP1.SwissRegulon
3.83499e-76	-0.440317	0.393	0.493	7.36318e-73	preGC-I	KLF9.MA1107.1
8.57757e-76	0.339018	0.573	0.473	1.64689e-72	preGC-I	ELF1.MA0473.2
2.30756e-75	0.346085	0.548	0.463	4.43051e-72	preGC-I	SPIC-HUMAN.H10MO.D
2.3219e-75	0.339341	0.57	0.467	4.45805e-72	preGC-I	E2F3.SwissRegulon
2.55045e-75	-0.99907	0.391	0.509	4.89687e-72	preGC-I	DUX4.MA0468.1
4.07988e-75	-0.727299	0.387	0.505	7.83336e-72	preGC-I	HOXC6.SwissRegulon
4.12868e-75	0.494812	0.56	0.466	7.92707e-72	preGC-I	RFX4.SwissRegulon
2.19455e-74	0.343459	0.535	0.441	4.21353e-71	preGC-I	GABP1-HUMAN.H10MO.C
2.40089e-74	-1.65289	0.379	0.52	4.60971e-71	preGC-I	DMBX1-HUMAN.H10MO.D
3.19419e-74	0.537822	0.534	0.446	6.13284e-71	preGC-I	PKNOX2.MA0783.1
3.77955e-74	-2.94895	0.55	0.417	7.25674e-71	preGC-I	NF-E2.HOMER
4.72379e-74	0.418488	0.548	0.457	9.06967e-71	preGC-I	NEUROD2.MA0668.1
1.12115e-73	-0.827122	0.378	0.47	2.15262e-70	preGC-I	SOX8-HUMAN.H10MO.D
2.33828e-73	0.349391	0.553	0.451	4.4895e-70	preGC-I	ETS:RUNX.HOMER
2.97443e-73	-0.620117	0.425	0.52	5.7109e-70	preGC-I	KLF14-HUMAN.H10MO.D
6.25489e-73	0.492246	0.555	0.453	1.20094e-69	preGC-I	HEY1-HUMAN.H10MO.D
1.08764e-72	0.478982	0.568	0.476	2.08828e-69	preGC-I	RFX3.SwissRegulon
3.61641e-72	0.828545	0.38	0.507	6.94351e-69	preGC-I	HNF1B.MA0153.2
6.405e-72	0.376244	0.552	0.457	1.22976e-68	preGC-I	E2F4-HUMAN.H10MO.A
8.59355e-72	0.364298	0.555	0.454	1.64996e-68	preGC-I	ZN282-HUMAN.H10MO.D
1.04779e-71	0.371825	0.558	0.459	2.01175e-68	preGC-I	GLIS1.SwissRegulon
5.40035e-71	0.396978	0.543	0.458	1.03687e-67	preGC-I	BHLHE23.MA0817.1
7.7777e-71	-8.78065	0.269	0.363	1.49332e-67	preGC-I	SOX6.SwissRegulon
9.9118e-71	-3.21151	0.474	0.596	1.90306e-67	preGC-I	CTCF.HOMER
1.2315e-70	-3.83758	0.479	0.605	2.36448e-67	preGC-I	CTCF.MA0139.1
2.06363e-70	-1.42644	0.38	0.477	3.96216e-67	preGC-I	NR1H4.SwissRegulon
4.78969e-70	0.203751	0.545	0.459	9.1962e-67	preGC-I	OLIG1.MA0826.1
6.52028e-70	-1.08406	0.548	0.425	1.25189e-66	preGC-I	MEF2D-HUMAN.H10MO.C
1.10978e-69	-0.856702	0.389	0.501	2.13078e-66	preGC-I	LMX1A.SwissRegulon
1.81104e-69	0.343955	0.55	0.462	3.47721e-66	preGC-I	SP1-HUMAN.H10MO.S
2.81628e-69	-0.347554	0.543	0.439	5.40726e-66	preGC-I	NFATC1.SwissRegulon
2.82008e-69	-0.729488	0.387	0.48	5.41455e-66	preGC-I	SRBP1-HUMAN.H10MO.B
4.23898e-69	0.413531	0.558	0.46	8.13884e-66	preGC-I	EGR3.SwissRegulon
1.0198e-68	0.629646	0.509	0.432	1.95801e-65	preGC-I	NFIC-HUMAN.H10MO.A
1.10155e-68	0.376699	0.518	0.45	2.11497e-65	preGC-I	SP1-HUMAN.H10MO.C
1.38679e-68	0.464855	0.531	0.446	2.66264e-65	preGC-I	MAFA.MAFA.SwissRegulon
2.07389e-68	0.0663798	0.54	0.43	3.98187e-65	preGC-I	PRDM1-HUMAN.H10MO.C
2.20647e-68	0.386317	0.564	0.462	4.23643e-65	preGC-I	E2F.HOMER
4.6781e-68	0.457526	0.522	0.453	8.98196e-65	preGC-I	MAZ.MAZ.SwissRegulon
5.50487e-68	-1.2792	0.365	0.53	1.05694e-64	preGC-I	NKX6-3.SwissRegulon
1.98323e-67	-0.124126	0.396	0.499	3.80779e-64	preGC-I	HNF1A.MA0046.2
2.05132e-67	0.157675	0.532	0.438	3.93853e-64	preGC-I	SUH-HUMAN.H10MO.C
2.69492e-67	-0.809063	0.376	0.502	5.17425e-64	preGC-I	CDX2.SwissRegulon
2.79556e-67	0.424393	0.556	0.461	5.36748e-64	preGC-I	EOMES.SwissRegulon
1.26633e-66	-0.413039	0.402	0.495	2.43135e-63	preGC-I	HMBOX1.SwissRegulon
1.30488e-66	-0.96618	0.387	0.467	2.50537e-63	preGC-I	ZFX.HOMER
2.53424e-66	-0.517721	0.575	0.449	4.86574e-63	preGC-I	EVX1-HUMAN.H10MO.D
3.57672e-66	0.308192	0.552	0.456	6.8673e-63	preGC-I	GRHL2.MA1105.1
6.94355e-66	-0.448722	0.393	0.497	1.33316e-62	preGC-I	SREBF1.MA0595.1
1.61974e-65	0.251501	0.543	0.382	3.1099e-62	preGC-I	BACH2.MA1101.1
1.99746e-65	0.406082	0.551	0.46	3.83513e-62	preGC-I	HLTF-HUMAN.H10MO.D
1.99821e-65	0.340222	0.546	0.465	3.83656e-62	preGC-I	SP1.SwissRegulon
2.88416e-65	-0.409151	0.429	0.522	5.53759e-62	preGC-I	KLF13.MA0657.1
3.68925e-65	1.23204	0.509	0.433	7.08336e-62	preGC-I	TLX1.SwissRegulon
5.7227e-65	0.296415	0.582	0.484	1.09876e-61	preGC-I	YY1.HOMER
8.29114e-65	-0.397349	0.401	0.501	1.5919e-61	preGC-I	OTX2.MA0712.1
9.84622e-65	0.23624	0.538	0.446	1.89048e-61	preGC-I	NFAC4-HUMAN.H10MO.C
9.84622e-65	0.23624	0.538	0.446	1.89048e-61	preGC-I	NFATC4.SwissRegulon
1.4312e-64	0.423716	0.568	0.477	2.7479e-61	preGC-I	RFX4.MA0799.1
2.32259e-64	0.255901	0.56	0.461	4.45938e-61	preGC-I	ELF4.SwissRegulon
2.69356e-64	-1.3769	0.388	0.523	5.17163e-61	preGC-I	TLX1-HUMAN.H10MO.S
3.70418e-64	0.395413	0.566	0.479	7.11203e-61	preGC-I	AHR-HUMAN.H10MO.B
9.7143e-64	0.287703	0.534	0.455	1.86515e-60	preGC-I	ZN148-HUMAN.H10MO.D
1.5793e-63	-0.464678	0.4	0.499	3.03226e-60	preGC-I	HMBOX1.MA0895.1
1.80598e-63	0.170863	0.536	0.449	3.46749e-60	preGC-I	NEUROD2.SwissRegulon
1.8089e-63	-11.4956	0.322	0.438	3.4731e-60	preGC-I	NKX2-8.SwissRegulon
1.92643e-63	0.20221	0.556	0.476	3.69875e-60	preGC-I	SP2.SwissRegulon
2.32261e-63	0.408238	0.55	0.452	4.45941e-60	preGC-I	TGIF2-HUMAN.H10MO.D
2.60543e-63	-1.01319	0.389	0.482	5.00242e-60	preGC-I	CREM-HUMAN.H10MO.C
2.68979e-63	-3.44562	0.366	0.459	5.16439e-60	preGC-I	NR4A2-HUMAN.H10MO.C
2.28383e-62	-0.576208	0.396	0.502	4.38495e-59	preGC-I	POU3F3.SwissRegulon
2.43496e-62	-0.31858	0.415	0.502	4.67513e-59	preGC-I	KLF3.HOMER
3.07918e-62	-0.52696	0.405	0.495	5.91203e-59	preGC-I	STAT5B.SwissRegulon
4.58071e-62	0.408538	0.559	0.472	8.79496e-59	preGC-I	EGR1.MA0162.3
7.13457e-62	-0.432925	0.402	0.49	1.36984e-58	preGC-I	ZNF264.HOMER
8.89986e-62	-0.982207	0.389	0.483	1.70877e-58	preGC-I	CREM.SwissRegulon
1.16876e-61	-1.21799	0.567	0.448	2.24401e-58	preGC-I	PAX1-HUMAN.H10MO.D
2.87623e-61	-10.4912	0.277	0.362	5.52236e-58	preGC-I	SOX2.SwissRegulon
4.10717e-61	0.328565	0.547	0.454	7.88576e-58	preGC-I	SMARCC2.SwissRegulon
1.98527e-60	-1.02383	0.541	0.424	3.81173e-57	preGC-I	GRE.HOMER
2.30657e-60	0.285252	0.536	0.457	4.42861e-57	preGC-I	CLOCK-HUMAN.H10MO.D
2.35122e-60	0.387553	0.547	0.462	4.51435e-57	preGC-I	MYBL2.SwissRegulon
1.26961e-59	-0.655181	0.41	0.506	2.43765e-56	preGC-I	CRX-HUMAN.H10MO.C
1.26961e-59	-0.655181	0.41	0.506	2.43765e-56	preGC-I	CRX.SwissRegulon
2.0266e-59	-0.475011	0.398	0.493	3.89107e-56	preGC-I	CUX2-HUMAN.H10MO.D
2.10737e-59	-0.0287697	0.544	0.459	4.04615e-56	preGC-I	NFAC3-HUMAN.H10MO.B
4.03488e-59	-2.24856	0.565	0.425	7.74696e-56	preGC-I	SOX5.SwissRegulon
4.85164e-59	0.332297	0.557	0.466	9.31516e-56	preGC-I	BHLHE40.SwissRegulon
5.16199e-59	0.354319	0.55	0.466	9.91102e-56	preGC-I	EGR2.MA0472.2
6.33387e-59	-0.910897	0.404	0.472	1.2161e-55	preGC-I	NR2C1-HUMAN.H10MO.C
6.33387e-59	-0.910897	0.404	0.472	1.2161e-55	preGC-I	NR2C1.SwissRegulon
6.97691e-59	0.316055	0.562	0.478	1.33957e-55	preGC-I	CREB1.SwissRegulon
1.45249e-58	-0.358895	0.418	0.501	2.78878e-55	preGC-I	HXA7-HUMAN.H10MO.D
1.52602e-58	0.409758	0.55	0.457	2.92996e-55	preGC-I	TBX2.SwissRegulon
1.5675e-58	0.338829	0.548	0.457	3.0096e-55	preGC-I	ELF3-HUMAN.H10MO.D
2.25679e-58	-1.33136	0.561	0.449	4.33303e-55	preGC-I	PAX9.SwissRegulon
2.27836e-58	0.338298	0.535	0.446	4.37446e-55	preGC-I	NF1.HOMER
4.17704e-58	0.332913	0.534	0.454	8.01992e-55	preGC-I	TBR1-HUMAN.H10MO.D
6.74731e-58	-0.636001	0.405	0.483	1.29548e-54	preGC-I	PO3F3-HUMAN.H10MO.D
1.04922e-57	0.327567	0.547	0.459	2.01451e-54	preGC-I	TBX19.SwissRegulon
1.09123e-57	-2.32843	0.384	0.464	2.09516e-54	preGC-I	HNF4A-HUMAN.H10MO.A
1.66651e-57	0.392922	0.559	0.47	3.19969e-54	preGC-I	ERF.MA0760.1
2.12906e-57	0.336206	0.54	0.454	4.08779e-54	preGC-I	ETV7.SwissRegulon
2.28743e-57	0.335815	0.565	0.472	4.39187e-54	preGC-I	CENPB.MA0637.1
2.45478e-57	0.427558	0.531	0.442	4.71317e-54	preGC-I	NR0B1-HUMAN.H10MO.D
2.45478e-57	0.427558	0.531	0.442	4.71317e-54	preGC-I	NR0B1.SwissRegulon
2.48026e-57	0.316269	0.561	0.478	4.76211e-54	preGC-I	ZBTB7B.MA0694.1
6.72521e-57	0.368853	0.545	0.462	1.29124e-53	preGC-I	MYBL1.MA0776.1
6.93216e-57	-4.37576	0.336	0.41	1.33097e-53	preGC-I	DMRT1.HOMER
7.39501e-57	0.386382	0.531	0.455	1.41984e-53	preGC-I	ZNF148.SwissRegulon
8.69211e-57	-0.203814	0.55	0.463	1.66889e-53	preGC-I	RELB-HUMAN.H10MO.C
8.69211e-57	-0.203814	0.55	0.463	1.66889e-53	preGC-I	RELB.SwissRegulon
1.36264e-56	-1.0531	0.379	0.522	2.61627e-53	preGC-I	HOXA10.MA0899.1
1.70874e-56	-0.334832	0.427	0.507	3.28078e-53	preGC-I	EGR4.SwissRegulon
4.48742e-56	0.245755	0.553	0.457	8.61584e-53	preGC-I	ARNTL.SwissRegulon
7.62891e-56	-1.61176	0.384	0.536	1.46475e-52	preGC-I	NKX6-2.SwissRegulon
8.03851e-56	0.330023	0.558	0.467	1.54339e-52	preGC-I	FOXK1-HUMAN.H10MO.D
9.70945e-56	0.20893	0.552	0.461	1.86421e-52	preGC-I	PAX6.HOMER
1.04229e-55	0.283046	0.534	0.447	2.0012e-52	preGC-I	MAF.MAF-HUMAN.H10MO.B
1.04229e-55	0.283046	0.534	0.447	2.0012e-52	preGC-I	MAF.MAF.SwissRegulon
1.34431e-55	0.345347	0.55	0.461	2.58107e-52	preGC-I	HINFP.SwissRegulon
1.92302e-55	-2.55796	0.479	0.581	3.6922e-52	preGC-I	CTCFL-HUMAN.H10MO.A
2.43105e-55	-0.832954	0.576	0.456	4.66761e-52	preGC-I	FOXJ1.SwissRegulon
3.13807e-55	-4.12968	0.376	0.43	6.02509e-52	preGC-I	GATA3.MA0037.3
3.13807e-55	-4.12968	0.376	0.43	6.02509e-52	preGC-I	GATA4.SwissRegulon
4.6695e-55	0.272651	0.556	0.471	8.96545e-52	preGC-I	ETS1.MA0098.3
5.9682e-55	-0.743727	0.404	0.502	1.14589e-51	preGC-I	PAX7.SwissRegulon
8.85207e-55	0.392164	0.545	0.465	1.6996e-51	preGC-I	GLIS1.MA0735.1
1.13691e-54	-0.754514	0.403	0.482	2.18286e-51	preGC-I	ERE.HOMER
2.04407e-54	-0.341881	0.415	0.497	3.92461e-51	preGC-I	NKX32-HUMAN.H10MO.C
3.23359e-54	-1.79914	0.378	0.459	6.20849e-51	preGC-I	HNF4G.MA0484.1
9.3778e-54	-0.990618	0.391	0.46	1.80054e-50	preGC-I	ZNF711.SwissRegulon
2.26136e-53	0.322771	0.557	0.475	4.34181e-50	preGC-I	ATF6A-HUMAN.H10MO.B
2.46029e-53	0.355796	0.537	0.461	4.72376e-50	preGC-I	TYY1-HUMAN.H10MO.A
8.29841e-53	0.293925	0.561	0.473	1.59329e-49	preGC-I	ZSC16-HUMAN.H10MO.D
1.09537e-52	0.316224	0.546	0.46	2.10311e-49	preGC-I	ETV1.SwissRegulon
1.19144e-52	0.38357	0.527	0.439	2.28757e-49	preGC-I	GATA1-HUMAN.H10MO.A
1.59808e-52	0.443746	0.519	0.433	3.06832e-49	preGC-I	SMAD1.SwissRegulon
2.25094e-52	-0.560936	0.428	0.505	4.32181e-49	preGC-I	HLF-HUMAN.H10MO.C
2.74541e-52	-2.4036	0.392	0.463	5.27118e-49	preGC-I	BMAL1.HOMER
3.82693e-52	-0.942968	0.393	0.522	7.3477e-49	preGC-I	HXC13-HUMAN.H10MO.D
4.7846e-52	-1.96743	0.356	0.448	9.18643e-49	preGC-I	PBX3.MA1114.1
6.0431e-52	-0.0640852	0.43	0.518	1.16028e-48	preGC-I	SP4.MA0685.1
8.41987e-52	-2.5923	0.486	0.582	1.61661e-48	preGC-I	SMC3.SwissRegulon
1.05543e-51	0.341938	0.552	0.46	2.02642e-48	preGC-I	ELF3.SwissRegulon
1.22854e-51	0.326632	0.539	0.45	2.35879e-48	preGC-I	SCRT1.SwissRegulon
1.68124e-51	-0.845881	0.399	0.512	3.22798e-48	preGC-I	HOXC10.MA0905.1
5.5589e-51	0.104871	0.537	0.455	1.06731e-47	preGC-I	MAFK.MAFK-HUMAN.H10MO.A
8.57994e-51	0.211081	0.513	0.454	1.64735e-47	preGC-I	MNT-HUMAN.H10MO.D
9.84512e-51	-0.638612	0.397	0.486	1.89026e-47	preGC-I	CEBP:AP1.HOMER
1.00187e-50	-0.422616	0.407	0.49	1.92359e-47	preGC-I	HCFC1.SwissRegulon
1.52842e-50	0.29352	0.53	0.449	2.93456e-47	preGC-I	TCF7.SwissRegulon
1.6376e-50	0.286722	0.549	0.471	3.14418e-47	preGC-I	ZN589-HUMAN.H10MO.D
1.73207e-50	-0.967712	0.387	0.463	3.32557e-47	preGC-I	PRDM4.SwissRegulon
2.73407e-50	0.336247	0.558	0.475	5.24941e-47	preGC-I	CREB3.MA0638.1
2.73586e-50	0.302458	0.546	0.46	5.25286e-47	preGC-I	NKX2-4.SwissRegulon
4.1389e-50	0.00834971	0.558	0.458	7.94669e-47	preGC-I	HMGA1-HUMAN.H10MO.D
4.1389e-50	0.00834971	0.558	0.458	7.94669e-47	preGC-I	HMGA1.SwissRegulon
5.40445e-50	-0.696444	0.412	0.486	1.03765e-46	preGC-I	HXC10-HUMAN.H10MO.D
7.49063e-50	0.186215	0.543	0.451	1.4382e-46	preGC-I	ONECUT1.SwissRegulon
1.03368e-49	0.324868	0.545	0.469	1.98467e-46	preGC-I	ARNT.SwissRegulon
1.07513e-49	0.353942	0.554	0.469	2.06425e-46	preGC-I	GCM1.MA0646.1
3.48441e-49	0.370483	0.519	0.443	6.69007e-46	preGC-I	SIN3A.SwissRegulon
5.10981e-49	0.417106	0.524	0.448	9.81083e-46	preGC-I	TFAP2A(var.2).MA0810.1
9.62826e-49	-4.07093	0.363	0.436	1.84863e-45	preGC-I	NKX28-HUMAN.H10MO.C
1.34099e-48	-0.137209	0.522	0.457	2.57469e-45	preGC-I	OLIG3.MA0827.1
1.98086e-48	-4.42637	0.339	0.414	3.80325e-45	preGC-I	SOX5-HUMAN.H10MO.C
2.02766e-48	-4.12019	0.379	0.449	3.89311e-45	preGC-I	NR6A1-HUMAN.H10MO.B
4.54856e-48	0.284974	0.532	0.453	8.73323e-45	preGC-I	ZKSCAN1.SwissRegulon
5.14707e-48	0.23685	0.567	0.477	9.88238e-45	preGC-I	FEV.MA0156.2
5.48741e-48	-0.609771	0.423	0.508	1.05358e-44	preGC-I	DLX5.SwissRegulon
7.14013e-48	-0.977507	0.408	0.481	1.3709e-44	preGC-I	MITF-HUMAN.H10MO.C
1.14331e-47	0.14684	0.544	0.462	2.19516e-44	preGC-I	PAX6.SwissRegulon
1.49024e-47	0.296179	0.561	0.47	2.86127e-44	preGC-I	ELK1-HUMAN.H10MO.A
1.71735e-47	-5.96193	0.354	0.414	3.29731e-44	preGC-I	JDP2.MA0655.1
2.00698e-47	0.266453	0.566	0.484	3.85341e-44	preGC-I	FOXI1-HUMAN.H10MO.B
2.25796e-47	-0.331457	0.42	0.5	4.33528e-44	preGC-I	PAX8-HUMAN.H10MO.D
3.10145e-47	0.45524	0.51	0.435	5.95478e-44	preGC-I	SMAD1-HUMAN.H10MO.D
3.31156e-47	0.219312	0.537	0.457	6.3582e-44	preGC-I	ZKSCAN3.SwissRegulon
8.80391e-47	-1.7904	0.38	0.434	1.69035e-43	preGC-I	GATA1-HUMAN.H10MO.S
1.10767e-46	0.117496	0.556	0.484	2.12672e-43	preGC-I	POU3F4.MA0789.1
2.17303e-46	-0.946315	0.533	0.435	4.17222e-43	preGC-I	NFE2L2.SwissRegulon
3.56052e-46	0.360659	0.535	0.471	6.8362e-43	preGC-I	ASCL2-HUMAN.H10MO.D
4.32385e-46	0.302111	0.541	0.464	8.3018e-43	preGC-I	TGIF2.SwissRegulon
4.49674e-46	-0.638121	0.412	0.482	8.63375e-43	preGC-I	NR1D1-HUMAN.H10MO.C
4.91081e-46	0.229327	0.545	0.47	9.42876e-43	preGC-I	HOXA13.MA0650.1
6.01636e-46	0.560319	0.517	0.447	1.15514e-42	preGC-I	PKNX2-HUMAN.H10MO.D
7.58022e-46	-3.84776	0.374	0.424	1.4554e-42	preGC-I	GATA2.MA0036.3
1.18437e-45	-0.433691	0.561	0.459	2.274e-42	preGC-I	FOXC1-HUMAN.H10MO.C
1.23808e-45	-0.582151	0.417	0.504	2.3771e-42	preGC-I	HOXA1.SwissRegulon
1.61411e-45	0.274468	0.533	0.45	3.09909e-42	preGC-I	TBX5-HUMAN.H10MO.D
1.72005e-45	-0.443752	0.422	0.503	3.30249e-42	preGC-I	HMBX1-HUMAN.H10MO.D
1.75335e-45	-8.31219	0.303	0.367	3.36643e-42	preGC-I	SOX10-HUMAN.H10MO.D
2.09462e-45	-3.86325	0.37	0.421	4.02168e-42	preGC-I	GATA1.SwissRegulon
2.18407e-45	0.341218	0.531	0.463	4.19341e-42	preGC-I	RFX5.SwissRegulon
2.50378e-45	-0.30894	0.415	0.492	4.80725e-42	preGC-I	ZNF232.SwissRegulon
3.53883e-45	-0.430964	0.419	0.492	6.79456e-42	preGC-I	HMX2.SwissRegulon
5.47972e-45	0.265889	0.534	0.454	1.05211e-41	preGC-I	BCL6B.SwissRegulon
7.2037e-45	-0.663417	0.417	0.485	1.38311e-41	preGC-I	RXRA::VDR.MA0074.1
8.40675e-45	-1.11145	0.395	0.51	1.6141e-41	preGC-I	POU1F1.MA0784.1
1.62936e-44	-11.8969	0.361	0.421	3.12837e-41	preGC-I	BATF.HOMER
1.96926e-44	0.297322	0.549	0.466	3.78098e-41	preGC-I	HSFY1-HUMAN.H10MO.D
2.82889e-44	0.2829	0.533	0.451	5.43147e-41	preGC-I	MAFB.MAFB-HUMAN.H10MO.D
2.86831e-44	0.333747	0.534	0.464	5.50715e-41	preGC-I	NR2E3.SwissRegulon
2.94676e-44	-0.322909	0.418	0.497	5.65778e-41	preGC-I	ZFP3.HOMER
4.53084e-44	0.291963	0.552	0.476	8.69921e-41	preGC-I	ATF6.SwissRegulon
9.31389e-44	0.39048	0.536	0.461	1.78827e-40	preGC-I	EBF.HOMER
1.26605e-43	0.326061	0.544	0.467	2.43082e-40	preGC-I	ZBED1-HUMAN.H10MO.D
6.77063e-43	0.320629	0.535	0.459	1.29996e-39	preGC-I	TBX19.MA0804.1
8.26554e-43	-1.73407	0.406	0.478	1.58698e-39	preGC-I	MITF.MA0620.2
8.27382e-43	-0.827861	0.419	0.49	1.58857e-39	preGC-I	TFEC.SwissRegulon
1.15633e-42	-0.523234	0.406	0.481	2.22015e-39	preGC-I	ESR2-HUMAN.H10MO.A
1.30937e-42	0.192345	0.55	0.478	2.51399e-39	preGC-I	KLF7.SwissRegulon
1.82796e-42	0.260006	0.539	0.457	3.50967e-39	preGC-I	TBX2-HUMAN.H10MO.D
2.08844e-42	-0.554261	0.547	0.43	4.0098e-39	preGC-I	SPIB.SwissRegulon
2.1615e-42	-0.840046	0.394	0.472	4.15008e-39	preGC-I	PAX2-HUMAN.H10MO.S
2.568e-42	-0.443012	0.413	0.49	4.93056e-39	preGC-I	OCT:OCT.HOMER
5.26796e-42	0.207327	0.554	0.483	1.01145e-38	preGC-I	ETV1.MA0761.1
7.76713e-42	0.223233	0.555	0.48	1.49129e-38	preGC-I	ETV4.MA0764.1
1.22196e-41	0.405207	0.513	0.443	2.34615e-38	preGC-I	SMAD2.SwissRegulon
1.66262e-41	0.243079	0.536	0.459	3.19223e-38	preGC-I	TP63.MA0525.2
9.84277e-41	0.262651	0.531	0.46	1.88981e-37	preGC-I	BHLHE23.SwissRegulon
1.58589e-40	0.0747416	0.532	0.451	3.0449e-37	preGC-I	MAFG.MAFG-HUMAN.H10MO.C
1.64263e-40	-3.43259	0.392	0.457	3.15386e-37	preGC-I	COT1-HUMAN.H10MO.B
3.25121e-40	-0.445369	0.419	0.49	6.24233e-37	preGC-I	HXD8-HUMAN.H10MO.D
3.51826e-40	-0.292238	0.421	0.492	6.75505e-37	preGC-I	ZN423-HUMAN.H10MO.D
4.63436e-40	-0.412783	0.419	0.485	8.89798e-37	preGC-I	RARA-HUMAN.H10MO.C
1.30305e-39	0.131304	0.528	0.45	2.50186e-36	preGC-I	SOX14.SwissRegulon
1.33361e-39	0.17459	0.542	0.47	2.56052e-36	preGC-I	PO5F1-HUMAN.H10MO.A
1.35877e-39	-0.485836	0.422	0.489	2.60883e-36	preGC-I	PO3F4-HUMAN.H10MO.D
3.868e-39	-0.636619	0.422	0.507	7.42655e-36	preGC-I	HOXB13.SwissRegulon
6.14948e-39	-1.95708	0.4	0.463	1.1807e-35	preGC-I	NR2C2-HUMAN.H10MO.A
1.04307e-38	-0.0504694	0.513	0.459	2.0027e-35	preGC-I	OLIG2.MA0678.1
1.2354e-38	0.27387	0.542	0.466	2.37198e-35	preGC-I	TAF1.SwissRegulon
1.61715e-38	0.121649	0.524	0.455	3.10492e-35	preGC-I	MNX1-HUMAN.H10MO.D
5.41134e-38	0.142994	0.525	0.448	1.03898e-34	preGC-I	ELF5-HUMAN.H10MO.D
6.40415e-38	-2.1034	0.49	0.575	1.2296e-34	preGC-I	RAD21.SwissRegulon
6.44248e-38	-1.9508	0.492	0.58	1.23696e-34	preGC-I	CTCF-HUMAN.H10MO.A
7.82529e-38	0.30763	0.548	0.473	1.50246e-34	preGC-I	ERG.MA0474.2
8.43781e-38	-0.591103	0.428	0.49	1.62006e-34	preGC-I	IRX5.SwissRegulon
1.11105e-37	-0.705787	0.548	0.459	2.13322e-34	preGC-I	PAX1.SwissRegulon
2.40884e-37	-6.78345	0.365	0.407	4.62498e-34	preGC-I	FOSL1::JUND.MA1142.1
2.50423e-37	0.348237	0.529	0.458	4.80812e-34	preGC-I	ZKSC1-HUMAN.H10MO.C
2.8517e-37	0.172919	0.531	0.469	5.47527e-34	preGC-I	HOXB5.SwissRegulon
5.38804e-37	0.271353	0.53	0.457	1.0345e-33	preGC-I	TFAP2C(var.2).MA0814.1
5.78743e-37	0.249689	0.549	0.474	1.11119e-33	preGC-I	PLAG1-HUMAN.H10MO.S
5.78743e-37	0.249689	0.549	0.474	1.11119e-33	preGC-I	PLAG1.SwissRegulon
7.31393e-37	0.180084	0.525	0.454	1.40428e-33	preGC-I	MEIS1.MA0498.2
7.31393e-37	0.180084	0.525	0.454	1.40428e-33	preGC-I	MEIS1.SwissRegulon
7.31393e-37	0.180084	0.525	0.454	1.40428e-33	preGC-I	MEIS2.SwissRegulon
8.26204e-37	-5.56812	0.382	0.422	1.58631e-33	preGC-I	GATA6.MA1104.1
8.35073e-37	-1.90895	0.403	0.47	1.60334e-33	preGC-I	USF1.MA0093.2
8.8762e-37	0.0041538	0.554	0.49	1.70423e-33	preGC-I	NRL.SwissRegulon
1.31429e-36	-4.48907	0.419	0.484	2.52343e-33	preGC-I	RELA.SwissRegulon
1.3213e-36	-0.421008	0.418	0.489	2.53689e-33	preGC-I	BATF3.MA0835.1
1.35496e-36	0.130601	0.521	0.471	2.60152e-33	preGC-I	PURA-HUMAN.H10MO.D
1.72973e-36	0.196998	0.551	0.48	3.32108e-33	preGC-I	FOXN1.SwissRegulon
2.50861e-36	-1.04033	0.4	0.459	4.81653e-33	preGC-I	PAX5.HOMER
2.77781e-36	0.0989903	0.528	0.442	5.3334e-33	preGC-I	IRF4.HOMER
3.848e-36	-0.0501268	0.553	0.487	7.38817e-33	preGC-I	HXA13-HUMAN.H10MO.C
4.04626e-36	0.365081	0.526	0.453	7.76882e-33	preGC-I	EBNA1.HOMER
9.84405e-36	0.176788	0.53	0.46	1.89006e-32	preGC-I	HSF4.SwissRegulon
1.83319e-35	-1.16165	0.374	0.418	3.51973e-32	preGC-I	JDP2.SwissRegulon
2.40738e-35	-0.481337	0.433	0.496	4.62217e-32	preGC-I	NFIL3.SwissRegulon
2.69318e-35	-0.299011	0.553	0.458	5.1709e-32	preGC-I	IRF9.SwissRegulon
3.44013e-35	-0.73107	0.416	0.508	6.60505e-32	preGC-I	POU3F1.SwissRegulon
3.6127e-35	0.375109	0.534	0.459	6.93638e-32	preGC-I	ZBT7A-HUMAN.H10MO.D
6.81039e-35	0.197459	0.536	0.465	1.3076e-31	preGC-I	PAX2.SwissRegulon
9.91659e-35	0.233152	0.542	0.476	1.90399e-31	preGC-I	E2F3.MA0469.2
1.36841e-34	0.351096	0.525	0.458	2.62735e-31	preGC-I	INSM1.MA0155.1
1.66823e-34	-0.253197	0.429	0.498	3.203e-31	preGC-I	PROX1.MA0794.1
1.78569e-34	0.146583	0.516	0.451	3.42852e-31	preGC-I	ZSCAN22.HOMER
1.84782e-34	-0.323666	0.422	0.492	3.54781e-31	preGC-I	ZIC2.SwissRegulon
2.34259e-34	0.14425	0.538	0.473	4.49776e-31	preGC-I	ELF4.MA0641.1
2.40667e-34	-5.28905	0.373	0.43	4.62081e-31	preGC-I	BATF::JUN.MA0462.1
1.14361e-33	0.364683	0.535	0.477	2.19574e-30	preGC-I	RFX2.SwissRegulon
1.26625e-33	0.179102	0.536	0.471	2.4312e-30	preGC-I	POU2F1.MA0785.1
1.31334e-33	-0.820049	0.492	0.578	2.52161e-30	preGC-I	CTCF.SwissRegulon
1.4116e-33	0.204049	0.549	0.491	2.71026e-30	preGC-I	ZIC1.MA0696.1
2.32019e-33	-0.380804	0.424	0.485	4.45476e-30	preGC-I	HMX3.SwissRegulon
2.62104e-33	0.463808	0.507	0.452	5.0324e-30	preGC-I	NFIA-HUMAN.H10MO.C
6.46404e-33	0.230287	0.522	0.453	1.2411e-29	preGC-I	TFAP2A.MA0003.3
9.16933e-33	0.1658	0.538	0.478	1.76051e-29	preGC-I	REST-HUMAN.H10MO.A
1.11117e-32	0.23881	0.55	0.481	2.13345e-29	preGC-I	ZBTB33.HOMER
1.20563e-32	-1.59667	0.411	0.468	2.3148e-29	preGC-I	COT2-HUMAN.H10MO.S
1.87913e-32	0.211268	0.524	0.472	3.60793e-29	preGC-I	ZNF740.MA0753.1
2.27856e-32	-0.547083	0.415	0.484	4.37484e-29	preGC-I	CEBPB.SwissRegulon
2.61974e-32	-0.347052	0.421	0.488	5.02991e-29	preGC-I	OTX2-HUMAN.H10MO.C
4.71941e-32	-6.60094	0.373	0.418	9.06127e-29	preGC-I	FOSL1-HUMAN.H10MO.A
1.39961e-31	0.251345	0.524	0.467	2.68725e-28	preGC-I	BHLHE22.MA0818.1
1.59173e-31	-2.91001	0.422	0.488	3.05612e-28	preGC-I	REL-HUMAN.H10MO.C
1.66484e-31	0.791299	0.517	0.415	3.1965e-28	preGC-I	JUND-HUMAN.H10MO.A
2.45488e-31	0.353679	0.523	0.457	4.71336e-28	preGC-I	OLIG1.SwissRegulon
3.38577e-31	-0.422653	0.431	0.494	6.50069e-28	preGC-I	GSC2.MA0891.1
4.20663e-31	-0.863588	0.535	0.456	8.07672e-28	preGC-I	Pax6.MA0069.1
5.12871e-31	0.227031	0.547	0.475	9.84713e-28	preGC-I	ZIC4.SwissRegulon
5.14056e-31	-1.12379	0.415	0.467	9.86988e-28	preGC-I	PPARD.SwissRegulon
1.03192e-30	-3.75975	0.402	0.454	1.98128e-27	preGC-I	NR3C2.SwissRegulon
1.51411e-30	0.163676	0.524	0.458	2.9071e-27	preGC-I	OCT4-SOX2-TCF-NANOG.HOMER
1.89451e-30	-0.503497	0.43	0.489	3.63745e-27	preGC-I	PAX5.MA0014.3
2.97802e-30	0.296307	0.522	0.48	5.7178e-27	preGC-I	EGR3.MA0732.1
3.09782e-30	-0.252989	0.438	0.502	5.9478e-27	preGC-I	CUX1-HUMAN.H10MO.C
3.26074e-30	-10.0202	0.354	0.398	6.26063e-27	preGC-I	FOSL2::JUN.MA1130.1
3.52987e-30	-0.61007	0.421	0.498	6.77736e-27	preGC-I	MSX2.SwissRegulon
3.57986e-30	0.222364	0.538	0.473	6.87333e-27	preGC-I	CHD2.SwissRegulon
1.07006e-29	0.084157	0.532	0.46	2.05451e-26	preGC-I	ZKSC3-HUMAN.H10MO.D
1.22906e-29	0.326678	0.515	0.459	2.3598e-26	preGC-I	TGIF1.MA0796.1
1.25318e-29	-0.701274	0.411	0.471	2.4061e-26	preGC-I	ESR1-HUMAN.H10MO.A
1.31509e-29	-0.765267	0.536	0.482	2.52497e-26	preGC-I	NFIA.MA0670.1
2.22753e-29	-0.390939	0.419	0.492	4.27686e-26	preGC-I	OTX2.SwissRegulon
2.63969e-29	-0.27995	0.429	0.492	5.0682e-26	preGC-I	PITX1-HUMAN.H10MO.D
2.96554e-29	-0.533592	0.429	0.485	5.69383e-26	preGC-I	ZNF524.SwissRegulon
5.53136e-29	-0.611698	0.531	0.433	1.06202e-25	preGC-I	SPIB-HUMAN.H10MO.B
1.29941e-28	0.356891	0.519	0.463	2.49486e-25	preGC-I	TGIF2.MA0797.1
1.37471e-28	0.202455	0.54	0.48	2.63944e-25	preGC-I	ZBTB7C.MA0695.1
1.48422e-28	-1.45109	0.429	0.477	2.8497e-25	preGC-I	ONECUT3.SwissRegulon
2.04228e-28	-0.120718	0.531	0.455	3.92117e-25	preGC-I	NPAS2.HOMER
2.16869e-28	0.215534	0.529	0.469	4.16388e-25	preGC-I	BRAC-HUMAN.H10MO.D
2.18837e-28	-0.696437	0.542	0.447	4.20167e-25	preGC-I	CDX4.HOMER
4.04828e-28	-0.399049	0.425	0.491	7.77269e-25	preGC-I	POU3F4.SwissRegulon
4.95888e-28	-0.93381	0.516	0.433	9.52104e-25	preGC-I	ANDR-HUMAN.H10MO.A
6.11136e-28	-0.489534	0.415	0.47	1.17338e-24	preGC-I	RXRA.SwissRegulon
6.22655e-28	0.200959	0.541	0.483	1.1955e-24	preGC-I	GMEB1.SwissRegulon
6.34406e-28	-0.432093	0.447	0.501	1.21806e-24	preGC-I	HLF.SwissRegulon
6.56458e-28	0.36799	0.539	0.481	1.2604e-24	preGC-I	FLI1.MA0475.2
6.86477e-28	0.299518	0.521	0.461	1.31804e-24	preGC-I	GCM1.SwissRegulon
1.08399e-27	-0.440481	0.508	0.426	2.08126e-24	preGC-I	VDR.HOMER
1.40311e-27	0.331695	0.502	0.455	2.69396e-24	preGC-I	ZNF467.HOMER
1.57548e-27	-3.25806	0.404	0.448	3.02491e-24	preGC-I	RXR.HOMER
1.95398e-27	0.0812951	0.512	0.472	3.75164e-24	preGC-I	ZNF281.SwissRegulon
2.14975e-27	-0.327704	0.527	0.453	4.12752e-24	preGC-I	PAX6-HUMAN.H10MO.D
2.22209e-27	0.238774	0.532	0.468	4.26641e-24	preGC-I	HINFP-HUMAN.H10MO.C
3.15692e-27	0.262783	0.516	0.46	6.06129e-24	preGC-I	MEIS3.SwissRegulon
5.82287e-27	0.197735	0.522	0.463	1.11799e-23	preGC-I	IRX2-HUMAN.H10MO.D
6.05274e-27	-0.418578	0.414	0.481	1.16213e-23	preGC-I	NR2F6-HUMAN.H10MO.D
1.16514e-26	0.22413	0.518	0.46	2.23707e-23	preGC-I	FEV-HUMAN.H10MO.C
1.33742e-26	0.0558206	0.525	0.464	2.56785e-23	preGC-I	PKNX1-HUMAN.H10MO.D
1.93151e-26	0.259004	0.518	0.453	3.7085e-23	preGC-I	HES1-HUMAN.H10MO.D
2.42567e-26	-0.367657	0.435	0.5	4.65729e-23	preGC-I	NFKB2.SwissRegulon
3.7766e-26	-1.44159	0.523	0.414	7.25106e-23	preGC-I	SOX4-HUMAN.H10MO.C
4.31953e-26	0.12374	0.522	0.458	8.2935e-23	preGC-I	ARI5B-HUMAN.H10MO.C
4.99031e-26	-0.253416	0.429	0.487	9.5814e-23	preGC-I	KLF3-HUMAN.H10MO.D
4.99031e-26	-0.253416	0.429	0.487	9.5814e-23	preGC-I	KLF3.SwissRegulon
5.51903e-26	0.114055	0.536	0.473	1.05965e-22	preGC-I	MLX.SwissRegulon
7.28689e-26	-0.413012	0.412	0.465	1.39908e-22	preGC-I	EGR1-HUMAN.H10MO.A
7.62459e-26	0.0538947	0.544	0.476	1.46392e-22	preGC-I	PO2F1-HUMAN.H10MO.B
8.12331e-26	-0.713896	0.423	0.472	1.55968e-22	preGC-I	ARID3A.SwissRegulon
1.31252e-25	-0.703468	0.433	0.513	2.52003e-22	preGC-I	HXC8-HUMAN.H10MO.D
1.31252e-25	-0.703468	0.433	0.513	2.52003e-22	preGC-I	HOXC8.SwissRegulon
1.69383e-25	0.349162	0.516	0.459	3.25215e-22	preGC-I	KAISO-HUMAN.H10MO.S
2.52524e-25	-2.98572	0.417	0.455	4.84846e-22	preGC-I	COT1-HUMAN.H10MO.S
2.73814e-25	0.250061	0.516	0.458	5.25722e-22	preGC-I	TBX3-HUMAN.H10MO.D
2.73814e-25	0.250061	0.516	0.458	5.25722e-22	preGC-I	TBX3.SwissRegulon
2.92709e-25	0.229633	0.522	0.468	5.62e-22	preGC-I	ERF-HUMAN.H10MO.D
3.91441e-25	0.119598	0.512	0.455	7.51567e-22	preGC-I	MEIS1-HUMAN.H10MO.C
3.95337e-25	0.282693	0.522	0.47	7.59048e-22	preGC-I	EOMES.MA0800.1
4.71834e-25	-0.500562	0.43	0.491	9.0592e-22	preGC-I	SRF.SwissRegulon
5.22188e-25	-0.485032	0.509	0.43	1.0026e-21	preGC-I	SOX4.MA0867.1
6.61426e-25	0.170188	0.53	0.469	1.26994e-21	preGC-I	REST.MA0138.2
6.71452e-25	0.216149	0.525	0.465	1.28919e-21	preGC-I	SPZ1-HUMAN.H10MO.D
8.20165e-25	0.233258	0.545	0.484	1.57472e-21	preGC-I	NFYB-HUMAN.H10MO.A
1.04347e-24	0.233872	0.521	0.47	2.00346e-21	preGC-I	RHXF1-HUMAN.H10MO.D
1.27379e-24	0.190419	0.507	0.47	2.44567e-21	preGC-I	TBX15-HUMAN.H10MO.D
1.4075e-24	0.245695	0.529	0.47	2.7024e-21	preGC-I	CREB3L1.MA0839.1
2.48445e-24	-0.224024	0.428	0.483	4.77015e-21	preGC-I	ARNT2-HUMAN.H10MO.D
2.55617e-24	-0.35234	0.43	0.48	4.90785e-21	preGC-I	ZBED1.SwissRegulon
2.98854e-24	-0.293007	0.426	0.481	5.738e-21	preGC-I	PIT1-HUMAN.H10MO.C
3.04054e-24	0.20541	0.528	0.474	5.83785e-21	preGC-I	GLIS1-HUMAN.H10MO.D
4.81058e-24	0.264901	0.511	0.466	9.23631e-21	preGC-I	TGIF1-HUMAN.H10MO.D
5.69169e-24	0.27459	0.518	0.467	1.09281e-20	preGC-I	HSF1.SwissRegulon
7.21829e-24	0.214977	0.525	0.466	1.38591e-20	preGC-I	GFY.HOMER
8.80302e-24	-0.356189	0.517	0.437	1.69018e-20	preGC-I	HSF1-HUMAN.H10MO.A
1.15842e-23	0.34146	0.509	0.458	2.22416e-20	preGC-I	EBF1.MA0154.3
1.63983e-23	-11.7238	0.364	0.393	3.14847e-20	preGC-I	FOSL1::JUN.MA1128.1
2.73785e-23	0.288021	0.521	0.478	5.25667e-20	preGC-I	KLF5.MA0599.1
3.18565e-23	-0.55213	0.412	0.475	6.11646e-20	preGC-I	PBX2.MA1113.1
4.58906e-23	0.193154	0.52	0.467	8.811e-20	preGC-I	PLAG1.MA0163.1
5.78136e-23	0.250526	0.515	0.465	1.11002e-19	preGC-I	TBX20.MA0689.1
6.42224e-23	0.0948408	0.521	0.474	1.23307e-19	preGC-I	HOXA6.SwissRegulon
6.42224e-23	0.0948408	0.521	0.474	1.23307e-19	preGC-I	HOXB6.SwissRegulon
1.18656e-22	-0.0516533	0.528	0.462	2.27819e-19	preGC-I	BMAL1-HUMAN.H10MO.C
1.715e-22	-0.476928	0.431	0.483	3.2928e-19	preGC-I	NFIL3.MA0025.1
2.00013e-22	-0.282698	0.432	0.485	3.84026e-19	preGC-I	PRDM14.SwissRegulon
2.0401e-22	-2.11213	0.424	0.468	3.917e-19	preGC-I	USF2.SwissRegulon
2.7441e-22	0.0837479	0.523	0.456	5.26867e-19	preGC-I	CUX2.SwissRegulon
3.36711e-22	0.293507	0.515	0.462	6.46486e-19	preGC-I	TBX2.MA0688.1
4.01355e-22	0.00103854	0.515	0.453	7.70602e-19	preGC-I	P53-HUMAN.H10MO.B
4.55432e-22	0.296895	0.509	0.465	8.74429e-19	preGC-I	EBF1.SwissRegulon
5.73688e-22	-0.655313	0.427	0.495	1.10148e-18	preGC-I	HOXC11.MA0651.1
6.62568e-22	0.24885	0.507	0.462	1.27213e-18	preGC-I	EOMES-HUMAN.H10MO.D
7.37248e-22	-0.0967302	0.439	0.495	1.41552e-18	preGC-I	SIX5.SwissRegulon
8.45302e-22	-7.4472	0.514	0.421	1.62298e-18	preGC-I	MAF::NFE2.MA0501.1
1.05157e-21	-0.265566	0.435	0.489	2.01902e-18	preGC-I	ISL1-HUMAN.H10MO.D
1.05157e-21	-0.265566	0.435	0.489	2.01902e-18	preGC-I	ISL1.SwissRegulon
1.05952e-21	0.168397	0.532	0.481	2.03428e-18	preGC-I	SPDEF.MA0686.1
1.168e-21	-0.424534	0.434	0.483	2.24256e-18	preGC-I	JUNB.SwissRegulon
2.54128e-21	0.182567	0.529	0.479	4.87925e-18	preGC-I	NFYC.SwissRegulon
3.03709e-21	0.122638	0.539	0.485	5.83121e-18	preGC-I	ELK3.MA0759.1
3.19571e-21	0.199506	0.517	0.466	6.13576e-18	preGC-I	PPARG-HUMAN.H10MO.A
4.66179e-21	0.321125	0.511	0.474	8.95064e-18	preGC-I	T.SwissRegulon
5.4484e-21	0.125912	0.519	0.465	1.04609e-17	preGC-I	ELF5.SwissRegulon
6.23733e-21	0.247291	0.531	0.477	1.19757e-17	preGC-I	RFX7.SwissRegulon
6.81941e-21	-0.483307	0.517	0.445	1.30933e-17	preGC-I	NR2F6.SwissRegulon
7.25642e-21	0.201384	0.527	0.473	1.39323e-17	preGC-I	MYBL2.MA0777.1
7.76264e-21	0.249547	0.519	0.465	1.49043e-17	preGC-I	GMEB2.SwissRegulon
7.80883e-21	0.0821401	0.524	0.473	1.4993e-17	preGC-I	HNF1B-HUMAN.H10MO.B
8.19696e-21	-9.15442	0.388	0.412	1.57382e-17	preGC-I	NFE2.MA0841.1
1.00289e-20	0.170782	0.518	0.468	1.92554e-17	preGC-I	ZN219-HUMAN.H10MO.D
1.53928e-20	-1.39095	0.431	0.472	2.95542e-17	preGC-I	TFE3.MA0831.2
1.78123e-20	0.0408595	0.518	0.465	3.41996e-17	preGC-I	CUX2.MA0755.1
1.78688e-20	0.182994	0.517	0.469	3.43081e-17	preGC-I	GRHL1.SwissRegulon
1.07698e-19	-0.453573	0.428	0.47	2.0678e-16	preGC-I	HRE.HOMER
1.14895e-19	-0.717688	0.509	0.444	2.20599e-16	preGC-I	BACH1-HUMAN.H10MO.A
1.19726e-19	0.174737	0.524	0.469	2.29875e-16	preGC-I	MYBB-HUMAN.H10MO.D
1.38037e-19	-2.34308	0.4	0.432	2.6503e-16	preGC-I	GATA5.MA0766.1
1.68523e-19	-4.38551	0.417	0.494	3.23564e-16	preGC-I	HOXA2.HOMER
2.13521e-19	0.0577088	0.508	0.463	4.09961e-16	preGC-I	PITX3-HUMAN.H10MO.D
2.15818e-19	-0.199626	0.445	0.495	4.1437e-16	preGC-I	PITX3.MA0714.1
2.74182e-19	0.204963	0.506	0.461	5.2643e-16	preGC-I	NR1I3-HUMAN.H10MO.C
2.74182e-19	0.204963	0.506	0.461	5.2643e-16	preGC-I	NR1I3.SwissRegulon
3.13892e-19	0.190046	0.512	0.46	6.02673e-16	preGC-I	TFCP2L1.SwissRegulon
3.44552e-19	-11.0779	0.38	0.403	6.61541e-16	preGC-I	FOSL2::JUNB.MA1138.1
3.5454e-19	0.129044	0.544	0.487	6.80716e-16	preGC-I	ETV5.MA0765.1
3.98996e-19	-0.718987	0.495	0.571	7.66072e-16	preGC-I	CTCFL.SwissRegulon
4.67106e-19	0.18863	0.525	0.47	8.96843e-16	preGC-I	ARID5B.SwissRegulon
5.60753e-19	0.0613496	0.512	0.452	1.07665e-15	preGC-I	GLI1-HUMAN.H10MO.C
5.60753e-19	0.0613496	0.512	0.452	1.07665e-15	preGC-I	GLI1.SwissRegulon
6.07164e-19	0.183049	0.531	0.478	1.16575e-15	preGC-I	VDR.SwissRegulon
7.05378e-19	-0.524733	0.433	0.481	1.35433e-15	preGC-I	HES5.SwissRegulon
7.33696e-19	0.14226	0.536	0.5	1.4087e-15	preGC-I	ZIC4.MA0751.1
1.03108e-18	-0.691137	0.411	0.452	1.97967e-15	preGC-I	GATA6.SwissRegulon
1.04579e-18	0.26732	0.529	0.488	2.00792e-15	preGC-I	RFX3-HUMAN.H10MO.B
1.05798e-18	-8.53554	0.369	0.394	2.03133e-15	preGC-I	FOS::JUNB.MA1134.1
1.64273e-18	-5.32102	0.536	0.426	3.15405e-15	preGC-I	SOX15.MA1152.1
1.66972e-18	-0.206848	0.446	0.492	3.20586e-15	preGC-I	ZNF41.HOMER
1.95924e-18	0.185016	0.511	0.463	3.76174e-15	preGC-I	TP53.MA0106.3
2.26455e-18	0.119844	0.537	0.487	4.34793e-15	preGC-I	HOMEZ-HUMAN.H10MO.D
2.56558e-18	0.158489	0.531	0.484	4.92592e-15	preGC-I	ETV3.SwissRegulon
4.34126e-18	-0.418847	0.506	0.446	8.33522e-15	preGC-I	ERG.HOMER
6.18238e-18	-0.435337	0.45	0.506	1.18702e-14	preGC-I	BARHL1.SwissRegulon
7.33542e-18	-0.049431	0.523	0.474	1.4084e-14	preGC-I	NF1:FOXA1.HOMER
7.62986e-18	-0.27618	0.44	0.486	1.46493e-14	preGC-I	ZIC4-HUMAN.H10MO.D
1.24729e-17	0.155478	0.542	0.492	2.3948e-14	preGC-I	CEBPZ.SwissRegulon
1.25028e-17	-1.10173	0.439	0.525	2.40054e-14	preGC-I	BARH1-HUMAN.H10MO.D
1.26432e-17	0.169034	0.531	0.487	2.4275e-14	preGC-I	NFYB.SwissRegulon
1.32086e-17	0.149745	0.511	0.463	2.53605e-14	preGC-I	HESX1.SwissRegulon
1.9285e-17	0.362592	0.502	0.457	3.70272e-14	preGC-I	EBF1.HOMER
2.52777e-17	-0.411502	0.438	0.498	4.85331e-14	preGC-I	NKX25-HUMAN.H10MO.C
3.5491e-17	-7.3298	0.384	0.393	6.81428e-14	preGC-I	FOSL1::JUNB.MA1137.1
7.59879e-17	-0.402634	0.438	0.481	1.45897e-13	preGC-I	VDR.MA0693.2
7.63946e-17	-0.932944	0.442	0.501	1.46678e-13	preGC-I	HXB1-HUMAN.H10MO.D
8.35995e-17	0.195606	0.512	0.469	1.60511e-13	preGC-I	TBX21.SwissRegulon
1.15747e-16	-1.24275	0.499	0.426	2.22234e-13	preGC-I	PR.HOMER
1.27154e-16	-1.78687	0.429	0.472	2.44135e-13	preGC-I	USF2.MA0526.2
1.3354e-16	-0.741199	0.439	0.478	2.56396e-13	preGC-I	MITF.SwissRegulon
1.52943e-16	-6.56568	0.373	0.394	2.93651e-13	preGC-I	FOS.MA0476.1
1.91339e-16	-0.274784	0.437	0.478	3.6737e-13	preGC-I	ZNF24.MA1124.1
2.23117e-16	-0.710408	0.44	0.505	4.28385e-13	preGC-I	POU3F2.MA0787.1
2.37366e-16	-0.482991	0.427	0.466	4.55744e-13	preGC-I	SOX13.SwissRegulon
2.95207e-16	-0.339103	0.441	0.481	5.66798e-13	preGC-I	NKX31-HUMAN.H10MO.C
4.89063e-16	-0.229459	0.45	0.492	9.39001e-13	preGC-I	SIX4.SwissRegulon
5.54255e-16	0.0755177	0.541	0.49	1.06417e-12	preGC-I	NFYA.SwissRegulon
1.3697e-15	-0.313014	0.503	0.444	2.62982e-12	preGC-I	GLI2-HUMAN.H10MO.B
1.63129e-15	0.131051	0.52	0.479	3.13208e-12	preGC-I	RARA.SwissRegulon
2.29516e-15	-4.8749	0.382	0.392	4.40671e-12	preGC-I	FOSB::JUNB.MA1135.1
2.43696e-15	-0.871867	0.43	0.519	4.67897e-12	preGC-I	HOXB9.SwissRegulon
2.54136e-15	-0.775788	0.434	0.47	4.87942e-12	preGC-I	MAFG.MAFG-HUMAN.H10MO.S
2.81244e-15	-0.225728	0.501	0.439	5.39988e-12	preGC-I	CPEB1-HUMAN.H10MO.D
3.11634e-15	0.186539	0.51	0.465	5.98336e-12	preGC-I	ZBTB3.SwissRegulon
3.57891e-15	-0.391021	0.428	0.474	6.8715e-12	preGC-I	PRRX1-HUMAN.H10MO.D
4.55175e-15	-7.58948	0.342	0.362	8.73936e-12	preGC-I	SOX10.SwissRegulon
4.71561e-15	0.0643687	0.523	0.474	9.05397e-12	preGC-I	FOS.SwissRegulon
6.35134e-15	0.0942588	0.524	0.471	1.21946e-11	preGC-I	HNF6.HOMER
9.71434e-15	-12.4202	0.373	0.389	1.86515e-11	preGC-I	FOS::JUND.MA1141.1
1.06149e-14	-1.54223	0.404	0.425	2.03806e-11	preGC-I	GATA3.SwissRegulon
1.22705e-14	0.0720054	0.539	0.491	2.35594e-11	preGC-I	NFYA-HUMAN.H10MO.A
1.81353e-14	0.0107392	0.53	0.49	3.48198e-11	preGC-I	ELK1.MA0028.2
2.84499e-14	-0.234666	0.434	0.477	5.46239e-11	preGC-I	JUND.SwissRegulon
4.19353e-14	0.0365681	0.506	0.453	8.05157e-11	preGC-I	ISRE.HOMER
4.54805e-14	-0.247302	0.438	0.482	8.73226e-11	preGC-I	ZNF652.SwissRegulon
4.71338e-14	-0.30771	0.432	0.458	9.0497e-11	preGC-I	SMAD2::SMAD3::SMAD4.MA0513.1
6.15018e-14	-1.27544	0.444	0.471	1.18084e-10	preGC-I	AIRE.SwissRegulon
7.29552e-14	0.0319615	0.509	0.479	1.40074e-10	preGC-I	POU3F2.SwissRegulon
7.70701e-14	-1.28722	0.43	0.45	1.47975e-10	preGC-I	NFAT:AP1.HOMER
8.00275e-14	0.128648	0.521	0.478	1.53653e-10	preGC-I	GFX.HOMER
8.14411e-14	0.0511346	0.503	0.462	1.56367e-10	preGC-I	HXB2-HUMAN.H10MO.D
1.24276e-13	-0.316505	0.528	0.489	2.38609e-10	preGC-I	HOXD10.SwissRegulon
1.45686e-13	-0.936852	0.441	0.475	2.79717e-10	preGC-I	TFEC.MA0871.1
1.5784e-13	-0.721721	0.429	0.464	3.03053e-10	preGC-I	NKX21-HUMAN.H10MO.D
1.5784e-13	-0.721721	0.429	0.464	3.03053e-10	preGC-I	NKX2-1.SwissRegulon
1.65817e-13	-9.06824	0.397	0.406	3.18369e-10	preGC-I	JUN::JUNB.MA1132.1
1.8341e-13	-4.87503	0.411	0.428	3.52146e-10	preGC-I	GATA3.HOMER
2.14486e-13	0.704286	0.519	0.491	4.11813e-10	preGC-I	KLF16.MA0741.1
2.42559e-13	0.236795	0.483	0.459	4.65713e-10	preGC-I	TFAP2C.MA0524.2
3.08254e-13	0.10395	0.536	0.489	5.91848e-10	preGC-I	YY2.MA0748.1
3.59633e-13	0.157081	0.52	0.472	6.90496e-10	preGC-I	HEY2.SwissRegulon
3.67013e-13	0.151785	0.499	0.462	7.04665e-10	preGC-I	TLX1-HUMAN.H10MO.D
3.83683e-13	0.152171	0.507	0.468	7.36672e-10	preGC-I	NKX23-HUMAN.H10MO.D
4.45672e-13	-2.47803	0.424	0.448	8.55691e-10	preGC-I	PPARA-HUMAN.H10MO.C
5.53233e-13	-0.449881	0.45	0.496	1.06221e-09	preGC-I	HOXD11.MA0908.1
5.8888e-13	-1.22802	0.441	0.472	1.13065e-09	preGC-I	AIRE-HUMAN.H10MO.C
6.90474e-13	-0.212938	0.454	0.485	1.32571e-09	preGC-I	ZNF691.SwissRegulon
7.92871e-13	0.183223	0.506	0.472	1.52231e-09	preGC-I	GSC2-HUMAN.H10MO.D
8.02518e-13	-0.773385	0.512	0.593	1.54083e-09	preGC-I	CTCFL.MA1102.1
1.0349e-12	-0.288879	0.443	0.482	1.987e-09	preGC-I	PPARD-HUMAN.H10MO.D
1.15877e-12	0.0817327	0.499	0.468	2.22484e-09	preGC-I	EGR1.SwissRegulon
1.56945e-12	-0.289849	0.441	0.479	3.01334e-09	preGC-I	POU2F1.SwissRegulon
2.05297e-12	-0.84972	0.495	0.437	3.94171e-09	preGC-I	NR4A1.SwissRegulon
2.28631e-12	-0.582772	0.424	0.456	4.38972e-09	preGC-I	SOX1-HUMAN.H10MO.D
2.40248e-12	0.160637	0.51	0.474	4.61276e-09	preGC-I	BATF3.SwissRegulon
2.45349e-12	-11.5259	0.39	0.394	4.7107e-09	preGC-I	FOSL2::JUND.MA1144.1
2.45371e-12	-0.766574	0.418	0.447	4.71112e-09	preGC-I	SMAD4.SwissRegulon
3.20827e-12	-0.524225	0.449	0.495	6.15989e-09	preGC-I	NFIA.SwissRegulon
3.25565e-12	0.083422	0.51	0.466	6.25086e-09	preGC-I	GCM2.SwissRegulon
3.53204e-12	0.221029	0.513	0.476	6.78152e-09	preGC-I	MUSC-HUMAN.H10MO.D
3.86012e-12	0.208942	0.489	0.448	7.41143e-09	preGC-I	EBF3.SwissRegulon
4.21525e-12	-0.356335	0.439	0.476	8.09328e-09	preGC-I	SOX11-HUMAN.H10MO.D
4.24887e-12	0.115821	0.518	0.477	8.15782e-09	preGC-I	XBP1.SwissRegulon
4.47298e-12	0.21499	0.542	0.497	8.58813e-09	preGC-I	NFYA.MA0060.3
4.96564e-12	-0.27583	0.511	0.466	9.53403e-09	preGC-I	GATA.HOMER
4.99213e-12	0.136812	0.521	0.481	9.58488e-09	preGC-I	CREB3.SwissRegulon
5.63202e-12	-0.262649	0.432	0.462	1.08135e-08	preGC-I	KLF12.SwissRegulon
6.16896e-12	-6.05256	0.445	0.468	1.18444e-08	preGC-I	RELA.MA0107.1
1.0519e-11	0.0714658	0.51	0.463	2.01965e-08	preGC-I	HESX1-HUMAN.H10MO.D
1.23003e-11	-0.960494	0.456	0.481	2.36166e-08	preGC-I	CEBP.HOMER
1.59784e-11	-1.01599	0.448	0.528	3.06785e-08	preGC-I	HOXA11.SwissRegulon
1.66898e-11	-0.714491	0.437	0.469	3.20444e-08	preGC-I	ARI3A-HUMAN.H10MO.D
1.75735e-11	-13.4181	0.392	0.392	3.37412e-08	preGC-I	FOS::JUN.MA0099.3
2.0585e-11	-0.327318	0.454	0.495	3.95233e-08	preGC-I	PO2F3-HUMAN.H10MO.D
2.12771e-11	-0.0762292	0.454	0.5	4.0852e-08	preGC-I	SP3.MA0746.1
2.13892e-11	-0.311619	0.451	0.485	4.10672e-08	preGC-I	GSC.HOMER
2.14753e-11	-0.402398	0.491	0.449	4.12325e-08	preGC-I	HSF1.MA0486.2
2.66123e-11	0.0464375	0.499	0.455	5.10956e-08	preGC-I	TEAD4.HOMER
4.08209e-11	-1.42629	0.444	0.47	7.83761e-08	preGC-I	MITF.HOMER
4.08897e-11	-0.23488	0.48	0.438	7.85082e-08	preGC-I	NR2E3-HUMAN.H10MO.C
4.66478e-11	0.0429159	0.502	0.458	8.95637e-08	preGC-I	HIVEP1.SwissRegulon
6.23186e-11	-0.00280643	0.498	0.454	1.19652e-07	preGC-I	ZBTB12.HOMER
6.43021e-11	-0.863042	0.433	0.468	1.2346e-07	preGC-I	USF1.SwissRegulon
6.5669e-11	-0.365026	0.49	0.442	1.26084e-07	preGC-I	HSF4.MA0771.1
8.65832e-11	-0.533339	0.505	0.456	1.6624e-07	preGC-I	RXRG-HUMAN.H10MO.B
8.82453e-11	-0.34435	0.453	0.488	1.69431e-07	preGC-I	BHLHE41.SwissRegulon
9.75892e-11	-0.338159	0.449	0.488	1.87371e-07	preGC-I	BARHL2.MA0635.1
9.97742e-11	-0.295693	0.46	0.49	1.91566e-07	preGC-I	BHLHE41.MA0636.1
1.09897e-10	0.0547162	0.515	0.476	2.11003e-07	preGC-I	ZEP2-HUMAN.H10MO.D
1.51901e-10	-0.883519	0.451	0.498	2.91649e-07	preGC-I	HOXB1.SwissRegulon
2.1467e-10	0.136924	0.512	0.469	4.12167e-07	preGC-I	SMAD3.SwissRegulon
2.22426e-10	-0.0148433	0.502	0.459	4.27058e-07	preGC-I	ZNF282.SwissRegulon
2.26621e-10	0.0635504	0.504	0.482	4.35112e-07	preGC-I	STAT1-HUMAN.H10MO.A
2.31097e-10	-0.159411	0.453	0.487	4.43706e-07	preGC-I	ZBTB12.SwissRegulon
2.42294e-10	-1.32238	0.431	0.449	4.65204e-07	preGC-I	HNF4G.SwissRegulon
2.43355e-10	-5.69581	0.416	0.423	4.67242e-07	preGC-I	FOS-HUMAN.H10MO.A
3.32745e-10	0.188809	0.51	0.474	6.38871e-07	preGC-I	RFX1-HUMAN.H10MO.C
3.32745e-10	0.188809	0.51	0.474	6.38871e-07	preGC-I	RFX1.SwissRegulon
1.04167e-09	-1.22577	0.503	0.442	2e-06	preGC-I	NR2F1.SwissRegulon
1.18226e-09	-1.95965	0.49	0.432	2.26994e-06	preGC-I	GCR-HUMAN.H10MO.S
1.18226e-09	-1.95965	0.49	0.432	2.26994e-06	preGC-I	PRGR-HUMAN.H10MO.S
1.18226e-09	-1.95965	0.49	0.432	2.26994e-06	preGC-I	PGR.SwissRegulon
1.24239e-09	-0.759282	0.448	0.467	2.38539e-06	preGC-I	ZBTB16.SwissRegulon
1.51357e-09	-0.115224	0.436	0.472	2.90605e-06	preGC-I	PBX3.SwissRegulon
1.52471e-09	-0.444389	0.434	0.469	2.92744e-06	preGC-I	HXC6-HUMAN.H10MO.D
1.54903e-09	-2.85587	0.424	0.449	2.97414e-06	preGC-I	PPARG-HUMAN.H10MO.S
1.63741e-09	-0.667634	0.448	0.493	3.14384e-06	preGC-I	EGR2.SwissRegulon
1.768e-09	-0.0309142	0.501	0.461	3.39455e-06	preGC-I	KLF13.SwissRegulon
1.85332e-09	-0.346324	0.453	0.488	3.55838e-06	preGC-I	GSC-HUMAN.H10MO.D
1.85912e-09	0.144897	0.498	0.463	3.56951e-06	preGC-I	TP73.MA0861.1
2.19367e-09	-6.25723	0.45	0.468	4.21185e-06	preGC-I	REL.MA0101.1
2.46243e-09	-0.0857582	0.495	0.461	4.72787e-06	preGC-I	ZNF317.HOMER
3.31356e-09	-0.0978687	0.506	0.482	6.36204e-06	preGC-I	NFIX.MA0671.1
3.36084e-09	-0.29044	0.463	0.499	6.45282e-06	preGC-I	RHOXF1.MA0719.1
3.67048e-09	-0.293053	0.444	0.493	7.04733e-06	preGC-I	KLF14.HOMER
7.43846e-09	0.0779484	0.503	0.477	1.42818e-05	preGC-I	ZBED1.MA0749.1
9.6767e-09	-0.253963	0.451	0.481	1.85793e-05	preGC-I	MAFG.MAFG.SwissRegulon
1.00559e-08	-0.149402	0.51	0.466	1.93073e-05	preGC-I	IRX3.SwissRegulon
1.01601e-08	-0.124313	0.498	0.463	1.95074e-05	preGC-I	P5F1B-HUMAN.H10MO.D
1.1274e-08	0.160192	0.506	0.475	2.16461e-05	preGC-I	HES5-HUMAN.H10MO.D
1.25207e-08	-0.392401	0.519	0.497	2.40396e-05	preGC-I	HXD10-HUMAN.H10MO.D
1.63968e-08	-0.461275	0.433	0.458	3.14819e-05	preGC-I	AP2C-HUMAN.H10MO.A
1.75239e-08	0.151786	0.495	0.464	3.3646e-05	preGC-I	ZNF282.MA1154.1
1.79612e-08	-0.0304775	0.498	0.471	3.44856e-05	preGC-I	DMBX1.SwissRegulon
1.88336e-08	0.0965262	0.507	0.475	3.61605e-05	preGC-I	ZNF219.SwissRegulon
1.90549e-08	-4.12463	0.439	0.495	3.65854e-05	preGC-I	HOXA2.SwissRegulon
2.30147e-08	-0.294432	0.486	0.459	4.41882e-05	preGC-I	NFAC2-HUMAN.H10MO.B
2.65964e-08	0.0761595	0.525	0.489	5.1065e-05	preGC-I	ETV3.MA0763.1
3.09789e-08	0.0754906	0.526	0.494	5.94796e-05	preGC-I	CEBPZ-HUMAN.H10MO.D
3.52549e-08	-15.0671	0.4	0.391	6.76894e-05	preGC-I	JUN-HUMAN.H10MO.A
4.11677e-08	-0.0201382	0.498	0.469	7.9042e-05	preGC-I	GATA5-HUMAN.H10MO.D
4.11677e-08	-0.0201382	0.498	0.469	7.9042e-05	preGC-I	GATA5.SwissRegulon
5.60214e-08	-0.0392578	0.512	0.475	0.000107561	preGC-I	ZN652-HUMAN.H10MO.D
5.91826e-08	0.0403613	0.512	0.487	0.000113631	preGC-I	NFYC-HUMAN.H10MO.B
6.19456e-08	-3.34818	0.489	0.442	0.000118935	preGC-I	JUNB-HUMAN.H10MO.C
6.2259e-08	0.0976601	0.508	0.476	0.000119537	preGC-I	ZNF8.SwissRegulon
8.94104e-08	-0.174864	0.474	0.5	0.000171668	preGC-I	YY1.MA0095.2
1.30522e-07	-0.0747502	0.501	0.47	0.000250602	preGC-I	NFAC1-HUMAN.H10MO.S
1.67469e-07	0.183228	0.5	0.477	0.00032154	preGC-I	ZBTB6.SwissRegulon
1.93388e-07	-0.42057	0.504	0.561	0.000371305	preGC-I	BORIS.HOMER
1.93887e-07	-0.239259	0.459	0.489	0.000372263	preGC-I	HDX.SwissRegulon
1.96778e-07	-1.13071	0.444	0.466	0.000377815	preGC-I	NR1H4-HUMAN.H10MO.C
2.00071e-07	-1.14002	0.487	0.439	0.000384136	preGC-I	MEF2C-HUMAN.H10MO.C
2.28443e-07	-0.819741	0.461	0.519	0.000438611	preGC-I	HMX2-HUMAN.H10MO.D
2.44378e-07	-0.140199	0.457	0.493	0.000469206	preGC-I	YY1.SwissRegulon
2.75413e-07	0.0616501	0.492	0.479	0.000528792	preGC-I	EGR2-HUMAN.H10MO.C
3.1962e-07	-0.071224	0.447	0.479	0.00061367	preGC-I	RUNX-AML.HOMER
3.52233e-07	-6.60041	0.457	0.479	0.000676288	preGC-I	TF65-HUMAN.H10MO.A
3.57428e-07	0.0812346	0.5	0.467	0.000686262	preGC-I	ZNF136.HOMER
3.97715e-07	-0.119593	0.455	0.48	0.000763613	preGC-I	NR1I2-HUMAN.H10MO.S
3.97715e-07	-0.119593	0.455	0.48	0.000763613	preGC-I	NR1I2.SwissRegulon
4.394e-07	-0.133714	0.454	0.481	0.000843649	preGC-I	ZNF143.MA0088.2
4.42091e-07	-10.5702	0.394	0.39	0.000848814	preGC-I	JUNB.MA0490.1
4.7414e-07	0.0951658	0.499	0.473	0.000910349	preGC-I	DPRX.SwissRegulon
6.84377e-07	-0.107049	0.458	0.483	0.001314	preGC-I	NKX2-3.SwissRegulon
7.109e-07	0.0731041	0.482	0.462	0.00136493	preGC-I	ATF5.SwissRegulon
7.46006e-07	-0.413848	0.449	0.461	0.00143233	preGC-I	SOX7-HUMAN.H10MO.D
9.63793e-07	-2.56409	0.467	0.474	0.00185048	preGC-I	REL.SwissRegulon
9.85197e-07	-0.0555677	0.436	0.456	0.00189158	preGC-I	PBX1.HOMER
1.22022e-06	-0.389709	0.46	0.488	0.00234282	preGC-I	NFKB2-HUMAN.H10MO.D
1.41123e-06	-0.701044	0.427	0.444	0.00270956	preGC-I	GATA1::TAL1.MA0140.2
1.59295e-06	0.032045	0.481	0.459	0.00305847	preGC-I	MEIS2-HUMAN.H10MO.B
2.25117e-06	-5.88395	0.408	0.389	0.00432225	preGC-I	JUN(var.2).MA0489.1
2.41101e-06	-0.0464019	0.49	0.462	0.00462914	preGC-I	PAX4.SwissRegulon
2.62455e-06	0.0799662	0.488	0.467	0.00503914	preGC-I	ETV5-HUMAN.H10MO.D
2.77841e-06	-9.05533	0.386	0.367	0.00533455	preGC-I	SOX10.MA0442.2
2.78889e-06	-0.345232	0.445	0.475	0.00535467	preGC-I	ATF3-HUMAN.H10MO.A
2.78889e-06	-0.345232	0.445	0.475	0.00535467	preGC-I	ATF3.SwissRegulon
2.79406e-06	-3.15072	0.484	0.428	0.0053646	preGC-I	NR3C1.SwissRegulon
2.93802e-06	0.0803861	0.511	0.487	0.005641	preGC-I	KAISO-HUMAN.H10MO.A
3.13273e-06	0.235644	0.473	0.459	0.00601485	preGC-I	TFAP2B.MA0811.1
3.20455e-06	-0.400457	0.458	0.493	0.00615274	preGC-I	POU3F1.MA0786.1
3.50372e-06	-0.867352	0.445	0.466	0.00672714	preGC-I	USF1.HOMER
5.00985e-06	-1.61442	0.441	0.451	0.00961891	preGC-I	NR2C2.SwissRegulon
5.11424e-06	-9.83238	0.417	0.415	0.00981935	preGC-I	NR3C1.MA0113.3
5.55293e-06	-0.203378	0.491	0.465	0.0106616	preGC-I	NR1I3-HUMAN.H10MO.S
5.82309e-06	0.0299725	0.502	0.481	0.0111803	preGC-I	KLF10.HOMER
6.74436e-06	-16.9375	0.397	0.383	0.0129492	preGC-I	JUND.MA0491.1
8.03935e-06	1.38959	0.52	0.494	0.0154355	preGC-I	KLF16.SwissRegulon
1.06157e-05	0.0248276	0.486	0.464	0.0203822	preGC-I	ZNF528.HOMER
1.35797e-05	-1.26085	0.458	0.468	0.0260731	preGC-I	TFEB.MA0692.1
1.41017e-05	-0.369624	0.448	0.458	0.0270753	preGC-I	PPARG.SwissRegulon
1.56692e-05	0.0889882	0.483	0.473	0.0300848	preGC-I	NKX2-8.MA0673.1
1.62607e-05	-0.374755	0.478	0.492	0.0312206	preGC-I	MGA.SwissRegulon
1.62607e-05	-0.374755	0.478	0.492	0.0312206	preGC-I	TBX4.SwissRegulon
1.67779e-05	-0.163352	0.501	0.463	0.0322137	preGC-I	ONEC2-HUMAN.H10MO.D
1.68338e-05	0.0702804	0.493	0.464	0.0323208	preGC-I	TCF7-HUMAN.H10MO.C
1.92967e-05	-0.463175	0.465	0.476	0.0370496	preGC-I	HES5.MA0821.1
2.12662e-05	-0.25413	0.494	0.452	0.0408311	preGC-I	SOX8.MA0868.1
2.14203e-05	0.128142	0.499	0.481	0.0411269	preGC-I	ZBTB4-HUMAN.H10MO.D
2.25992e-05	-0.0914784	0.495	0.464	0.0433904	preGC-I	EVX2-HUMAN.H10MO.A
2.37429e-05	-0.00263864	0.5	0.473	0.0455863	preGC-I	HNF6-HUMAN.H10MO.C
2.40652e-05	-0.230285	0.467	0.492	0.0462052	preGC-I	NKX3-2.SwissRegulon
2.49405e-05	-0.72747	0.452	0.521	0.0478857	preGC-I	HOXC11.SwissRegulon
2.51794e-05	-0.375357	0.439	0.457	0.0483445	preGC-I	ZNF322.HOMER
3.47444e-05	-0.00733418	0.481	0.46	0.0667093	preGC-I	CDX1.MA0878.1
5.13826e-05	-0.167458	0.483	0.507	0.0986546	preGC-I	SP8.SwissRegulon
5.27699e-05	-0.35493	0.462	0.472	0.101318	preGC-I	HES7.SwissRegulon
6.51401e-05	0.0606021	0.494	0.466	0.125069	preGC-I	AMYB.HOMER
6.94902e-05	0.087803	0.526	0.499	0.133421	preGC-I	E2F1.MA0024.3
7.95324e-05	-0.157397	0.474	0.493	0.152702	preGC-I	E2F2.MA0864.1
8.23495e-05	-0.151629	0.463	0.486	0.158111	preGC-I	ZN232-HUMAN.H10MO.D
8.50506e-05	-0.0278661	0.481	0.481	0.163297	preGC-I	ZNF740.SwissRegulon
8.72813e-05	-2.27102	0.43	0.426	0.16758	preGC-I	GCR-HUMAN.H10MO.A
9.17901e-05	-0.192759	0.456	0.476	0.176237	preGC-I	HBP1-HUMAN.H10MO.D
9.25088e-05	0.177133	0.501	0.48	0.177617	preGC-I	RFX.HOMER
0.000115056	0.0463145	0.481	0.466	0.220908	preGC-I	SOX8.SwissRegulon
0.000144957	-0.0104817	0.504	0.477	0.278318	preGC-I	SREBF1.SwissRegulon
0.000160207	-0.144004	0.463	0.486	0.307597	preGC-I	SOX1.SwissRegulon
0.000181691	-0.142745	0.503	0.47	0.348847	preGC-I	AR.SwissRegulon
0.000195161	0.0470444	0.464	0.444	0.374709	preGC-I	GATA2.SwissRegulon
0.000215332	-0.129403	0.488	0.456	0.413437	preGC-I	ZNF675.HOMER
0.000253792	-0.240944	0.445	0.459	0.487281	preGC-I	ESR1-HUMAN.H10MO.S
0.000283469	-0.014314	0.457	0.483	0.54426	preGC-I	TBX20.SwissRegulon
0.000293956	0.100511	0.496	0.476	0.564396	preGC-I	CR3L2-HUMAN.H10MO.D
0.000297721	0.0320384	0.493	0.47	0.571625	preGC-I	MCR-HUMAN.H10MO.D
0.0003456	0.127125	0.488	0.475	0.663551	preGC-I	GLIS3.MA0737.1
0.000349787	0.0190805	0.502	0.471	0.671591	preGC-I	TBX19-HUMAN.H10MO.D
0.000385882	-0.38079	0.464	0.468	0.740893	preGC-I	HES7.MA0822.1
0.000466969	-0.289291	0.46	0.479	0.896581	preGC-I	CRE.HOMER
0.000484241	-0.144347	0.467	0.479	0.929743	preGC-I	TP63.SwissRegulon
0.000509624	-12.98	0.404	0.387	0.978479	preGC-I	FOSL2.MA0478.1
0.000525782	0.0222378	0.501	0.477	1	preGC-I	GLI2.MA0734.1
0.00055362	-1.21077	0.456	0.456	1	preGC-I	HNF4A.SwissRegulon
0.000640868	-0.119123	0.454	0.469	1	preGC-I	ZNF165.HOMER
0.000657566	-0.2955	0.458	0.477	1	preGC-I	MAFK.MAFK.SwissRegulon
0.000659708	-0.0310569	0.504	0.486	1	preGC-I	NFY.HOMER
0.00071896	-1.64047	0.458	0.454	1	preGC-I	FOSL2.SwissRegulon
0.000776149	-0.0288586	0.487	0.475	1	preGC-I	NR2E1-HUMAN.H10MO.D
0.000777026	-3.00726	0.454	0.446	1	preGC-I	RXRB.MA0855.1
0.000807878	-3.19129	0.444	0.443	1	preGC-I	FOSB.SwissRegulon
0.000853988	0.0554322	0.504	0.482	1	preGC-I	YBOX1-HUMAN.H10MO.D
0.000955969	-0.215548	0.46	0.477	1	preGC-I	SOX11.SwissRegulon
0.000971871	-0.392569	0.46	0.491	1	preGC-I	HOXA10.SwissRegulon
0.00105372	-0.14216	0.482	0.497	1	preGC-I	ZNF784.SwissRegulon
0.00106788	0.0827021	0.503	0.494	1	preGC-I	E4F1-HUMAN.H10MO.D
0.00106788	0.0827021	0.503	0.494	1	preGC-I	E4F1.SwissRegulon
0.00120538	-0.409086	0.446	0.455	1	preGC-I	SOX3-HUMAN.H10MO.D
0.00136595	0.0446189	0.502	0.483	1	preGC-I	ZNF423.SwissRegulon
0.0014049	-0.337391	0.453	0.467	1	preGC-I	IRX3-HUMAN.H10MO.D
0.00149712	-1.36463	0.456	0.453	1	preGC-I	ZNF384.MA1125.1
0.00160089	-0.0237795	0.481	0.463	1	preGC-I	MYB.MA0100.3
0.00160532	-1.13698	0.453	0.456	1	preGC-I	NR2C2.MA0504.1
0.00163147	-0.0384434	0.498	0.479	1	preGC-I	SMAD3.MA0795.1
0.00166729	0.0183043	0.493	0.473	1	preGC-I	ZNF669.HOMER
0.00167585	-7.78089	0.423	0.415	1	preGC-I	NR3C2.MA0727.1
0.00181331	-0.0921446	0.464	0.484	1	preGC-I	PROX1.SwissRegulon
0.00199231	-0.258712	0.459	0.472	1	preGC-I	SIX6.SwissRegulon
0.00199623	0.0700253	0.495	0.476	1	preGC-I	TBX21-HUMAN.H10MO.D
0.00207223	-0.132081	0.466	0.473	1	preGC-I	PRD14-HUMAN.H10MO.C
0.00223363	-0.360331	0.466	0.449	1	preGC-I	HSF2.MA0770.1
0.00236936	-0.0341013	0.473	0.49	1	preGC-I	MYBL1.SwissRegulon
0.0023853	-0.023155	0.485	0.465	1	preGC-I	SRF.MA0083.3
0.0024271	-7.20594	0.484	0.44	1	preGC-I	PAX1.MA0779.1
0.00247504	0.0622771	0.487	0.47	1	preGC-I	ZNF354C.MA0130.1
0.00254345	-0.296908	0.48	0.48	1	preGC-I	CEBPE-HUMAN.H10MO.A
0.00261549	-0.207913	0.474	0.454	1	preGC-I	GLI3.SwissRegulon
0.00265672	0.0941206	0.486	0.471	1	preGC-I	ZNF416.HOMER
0.00278596	-0.0940776	0.472	0.486	1	preGC-I	ZIC2-HUMAN.H10MO.C
0.00286295	-0.182802	0.447	0.462	1	preGC-I	P63-HUMAN.H10MO.A
0.00291389	-0.239098	0.449	0.456	1	preGC-I	ESR1.SwissRegulon
0.00314813	0.187003	0.494	0.478	1	preGC-I	TBX21.MA0690.1
0.0032871	-0.129707	0.462	0.478	1	preGC-I	DMC1.SwissRegulon
0.00341542	-0.113805	0.503	0.481	1	preGC-I	MLX.MA0663.1
0.00344091	-0.221038	0.473	0.487	1	preGC-I	TFEB.SwissRegulon
0.00410958	-0.674457	0.497	0.473	1	preGC-I	ZEP1-HUMAN.H10MO.D
0.00498035	-5.38424	0.483	0.438	1	preGC-I	PAX9.MA0781.1
0.0053438	-1.49109	0.497	0.452	1	preGC-I	ZNF35.SwissRegulon
0.00571206	0.0557718	0.485	0.472	1	preGC-I	PROX1-HUMAN.H10MO.D
0.00583331	-0.154462	0.47	0.49	1	preGC-I	GSC.SwissRegulon
0.00618446	-0.0450804	0.464	0.483	1	preGC-I	GLI3.HOMER
0.00726995	-1.51829	0.431	0.421	1	preGC-I	SOX4.SwissRegulon
0.00746346	-3.81486	0.468	0.422	1	preGC-I	FOSB-HUMAN.H10MO.C
0.00764251	-0.102288	0.482	0.46	1	preGC-I	NFAC1-HUMAN.H10MO.A
0.00833874	-0.197568	0.467	0.475	1	preGC-I	HXD12-HUMAN.H10MO.D
0.00848682	-0.0944645	0.481	0.495	1	preGC-I	GMEB2-HUMAN.H10MO.D
0.00911291	-0.227265	0.444	0.455	1	preGC-I	RXRA-HUMAN.H10MO.C
0.00923757	0.165172	0.476	0.469	1	preGC-I	TFAP2C.SwissRegulon
0.00939122	-0.037881	0.478	0.488	1	preGC-I	HES7-HUMAN.H10MO.D
0.00942518	-0.168861	0.497	0.474	1	preGC-I	BHE40-HUMAN.H10MO.A
0.0102004	0.0503924	0.481	0.476	1	preGC-I	PKNOX1.MA0782.1
0.0103889	-0.827909	0.471	0.445	1	preGC-I	PRGR-HUMAN.H10MO.C
0.0108369	-0.224622	0.455	0.474	1	preGC-I	OTX1.SwissRegulon
0.0110219	-0.871655	0.453	0.458	1	preGC-I	MEF2A-HUMAN.H10MO.A
0.0118427	0.0869529	0.479	0.47	1	preGC-I	PKNOX2.SwissRegulon
0.0120042	0.0615839	0.49	0.48	1	preGC-I	DPRX-HUMAN.H10MO.D
0.0125853	0.0155105	0.485	0.474	1	preGC-I	GLI2.SwissRegulon
0.0130536	-0.0897668	0.466	0.448	1	preGC-I	TCF7L1.SwissRegulon
0.0155376	-0.0464662	0.468	0.477	1	preGC-I	MYB-HUMAN.H10MO.C
0.0160019	-0.759111	0.475	0.519	1	preGC-I	HOXC13.MA0907.1
0.0166914	0.0133552	0.479	0.486	1	preGC-I	GCM2-HUMAN.H10MO.D
0.0202179	-0.0154198	0.482	0.469	1	preGC-I	HSF4-HUMAN.H10MO.D
0.0221922	0.044195	0.469	0.476	1	preGC-I	THAP1.MA0597.1
0.0225485	-0.0147504	0.466	0.453	1	preGC-I	COE1-HUMAN.H10MO.A
0.0235295	-0.255824	0.475	0.447	1	preGC-I	OSR2.SwissRegulon
0.0246421	-1.33807	0.469	0.435	1	preGC-I	NFE2-HUMAN.H10MO.B
0.0258753	-0.103332	0.484	0.469	1	preGC-I	NANOG-HUMAN.H10MO.A
0.0275897	-0.0253494	0.486	0.483	1	preGC-I	PBX2-HUMAN.H10MO.C
0.0275897	-0.0253494	0.486	0.483	1	preGC-I	PBX2.SwissRegulon
0.0289949	0.0629133	0.484	0.47	1	preGC-I	P73-HUMAN.H10MO.A
0.0291907	-0.0283708	0.471	0.483	1	preGC-I	ZIC3.SwissRegulon
0.0323445	-0.0110558	0.488	0.467	1	preGC-I	HXA9-HUMAN.H10MO.D
0.0332383	-0.538001	0.484	0.47	1	preGC-I	CDX1-HUMAN.H10MO.C
0.0332383	-0.538001	0.484	0.47	1	preGC-I	CDX1.SwissRegulon
0.0334515	-0.103194	0.477	0.459	1	preGC-I	GFI1.SwissRegulon
0.0355932	-0.174043	0.498	0.478	1	preGC-I	MLXIPL.MA0664.1
0.0363739	-0.128213	0.475	0.46	1	preGC-I	SOX21-HUMAN.H10MO.D
0.0377399	-0.139395	0.487	0.471	1	preGC-I	HOXC12.MA0906.1
0.0380009	0.0120649	0.474	0.479	1	preGC-I	GLIS3.SwissRegulon
0.0396693	-0.893352	0.468	0.475	1	preGC-I	NFIC.MA0161.2
0.0400929	0.0715679	0.486	0.475	1	preGC-I	RFX5-HUMAN.H10MO.A
0.0402391	-2.99731	0.461	0.443	1	preGC-I	RXRG.MA0856.1
0.0429894	-0.0142366	0.462	0.471	1	preGC-I	GLIS3-HUMAN.H10MO.D
0.0431841	0.0111344	0.495	0.484	1	preGC-I	GMEB2.MA0862.1
0.055247	-0.0848462	0.464	0.447	1	preGC-I	SMAD4-HUMAN.H10MO.C
0.0585718	-0.0275949	0.486	0.478	1	preGC-I	PBX1.SwissRegulon
0.0617781	-0.942065	0.468	0.473	1	preGC-I	NFIA-HUMAN.H10MO.S
0.0617781	-0.942065	0.468	0.473	1	preGC-I	NFIB.SwissRegulon
0.0617781	-0.942065	0.468	0.473	1	preGC-I	NFIX.SwissRegulon
0.0630305	-2.75371	0.466	0.461	1	preGC-I	RXRG.SwissRegulon
0.063114	-0.0477326	0.483	0.486	1	preGC-I	YBX1.SwissRegulon
0.068178	0.0689797	0.489	0.479	1	preGC-I	GLIS2.SwissRegulon
0.0770823	0.023809	0.463	0.477	1	preGC-I	ZN143-HUMAN.H10MO.A
0.0828217	-0.0647045	0.48	0.464	1	preGC-I	HSF2-HUMAN.H10MO.A
0.0856549	0.115719	0.488	0.481	1	preGC-I	GLIS2-HUMAN.H10MO.D
0.0916745	0.0330483	0.494	0.478	1	preGC-I	HES1.SwissRegulon
0.0967899	0.0363309	0.463	0.482	1	preGC-I	ZNF16.HOMER
0.0978448	-0.0608549	0.479	0.495	1	preGC-I	TYY2-HUMAN.H10MO.D
0.0996834	-0.45058	0.476	0.509	1	preGC-I	HOXB13.MA0901.1
0.100305	-0.338389	0.457	0.471	1	preGC-I	NFAT.HOMER
0.102354	0.0182544	0.464	0.482	1	preGC-I	INSM1-HUMAN.H10MO.C
0.109202	0.00183815	0.468	0.482	1	preGC-I	T.MA0009.2
0.114005	-0.133789	0.482	0.49	1	preGC-I	PITX3.SwissRegulon
0.124085	-5.39373	0.445	0.387	1	preGC-I	AP-1.HOMER
0.138529	-0.141738	0.449	0.491	1	preGC-I	ZN740-HUMAN.H10MO.D
0.14429	-0.066916	0.495	0.478	1	preGC-I	CUX1.MA0754.1
0.164336	-0.240237	0.479	0.457	1	preGC-I	EVI1-HUMAN.H10MO.B
0.174955	-0.0560217	0.463	0.476	1	preGC-I	TGIF2LX.SwissRegulon
0.177447	-0.102629	0.478	0.487	1	preGC-I	NR2F2.SwissRegulon
0.178888	-0.114761	0.476	0.467	1	preGC-I	MEIS3.MA0775.1
0.183255	0.0613379	0.488	0.484	1	preGC-I	ZN784-HUMAN.H10MO.D
0.194851	-3.51808	0.459	0.48	1	preGC-I	HOXA9.SwissRegulon
0.199207	-4.15601	0.457	0.486	1	preGC-I	HOXA9.HOMER
0.203646	-0.0805784	0.472	0.474	1	preGC-I	PRDM14.HOMER
0.205635	-0.212946	0.479	0.462	1	preGC-I	NR1D1.SwissRegulon
0.212529	-0.424692	0.493	0.471	1	preGC-I	TFEB-HUMAN.H10MO.C
0.221811	0.123853	0.492	0.486	1	preGC-I	HIC2.SwissRegulon
0.233977	-0.0810288	0.466	0.474	1	preGC-I	NKX2-5.SwissRegulon
0.238935	-3.03696	0.456	0.433	1	preGC-I	BACH1.SwissRegulon
0.241069	-0.430893	0.455	0.454	1	preGC-I	SOX21.MA0866.1
0.245094	0.0337842	0.487	0.471	1	preGC-I	SOX21.SwissRegulon
0.251285	-0.629533	0.46	0.46	1	preGC-I	MAFF.MAFF-HUMAN.H10MO.A
0.253398	0.05634	0.483	0.47	1	preGC-I	HAND1.SwissRegulon
0.257071	0.0543611	0.489	0.483	1	preGC-I	OTX1.MA0711.1
0.269599	0.0654304	0.479	0.473	1	preGC-I	TBX20-HUMAN.H10MO.D
0.287015	-0.0314429	0.476	0.481	1	preGC-I	TAL1-HUMAN.H10MO.A
0.307885	-0.0508355	0.487	0.492	1	preGC-I	ZBTB33.SwissRegulon
0.313702	-1.24237	0.45	0.441	1	preGC-I	COT2-HUMAN.H10MO.A
0.315073	-0.188105	0.482	0.473	1	preGC-I	PO2F2-HUMAN.H10MO.D
0.32209	-0.0458893	0.489	0.481	1	preGC-I	HNF1B.SwissRegulon
0.322986	0.0076855	0.483	0.475	1	preGC-I	NKX2-3.MA0672.1
0.359453	-0.0938165	0.47	0.463	1	preGC-I	SOX7.SwissRegulon
0.364925	0.0119429	0.486	0.49	1	preGC-I	MGA.MA0801.1
0.364925	0.0119429	0.486	0.49	1	preGC-I	TBX15.MA0803.1
0.381786	-0.149809	0.48	0.466	1	preGC-I	TFCP2-HUMAN.H10MO.D
0.39507	-1.06438	0.472	0.47	1	preGC-I	CDX2-HUMAN.H10MO.C
0.410785	-1.12369	0.466	0.455	1	preGC-I	PPARA::RXRA.MA1148.1
0.427953	-0.140481	0.473	0.482	1	preGC-I	HNF1A.SwissRegulon
0.470772	-1.25688	0.456	0.419	1	preGC-I	GATA4-HUMAN.H10MO.B
0.478184	-0.0798983	0.463	0.469	1	preGC-I	OSR1.SwissRegulon
0.500095	-9.95712	0.428	0.391	1	preGC-I	SMARCC1.SwissRegulon
0.503899	-0.242971	0.466	0.454	1	preGC-I	SMAD3-HUMAN.H10MO.C
0.5059	-0.0208449	0.476	0.474	1	preGC-I	NR1I2-HUMAN.H10MO.C
0.521697	-0.153448	0.47	0.48	1	preGC-I	HNF1A-HUMAN.H10MO.A
0.534087	-0.0640824	0.476	0.479	1	preGC-I	GSC.MA0648.1
0.551705	-0.0397719	0.486	0.493	1	preGC-I	EGR4.MA0733.1
0.568957	-0.373781	0.444	0.415	1	preGC-I	GATA2-HUMAN.H10MO.A
0.573292	-0.416117	0.481	0.49	1	preGC-I	HOXD12.MA0873.1
0.574947	0.0020618	0.478	0.482	1	preGC-I	ZBTB6-HUMAN.H10MO.D
0.576071	0.0346547	0.475	0.485	1	preGC-I	NDF2-HUMAN.H10MO.D
0.58106	-0.296503	0.462	0.466	1	preGC-I	CDX2.MA0465.1
0.586426	-0.230899	0.485	0.473	1	preGC-I	IRX4.SwissRegulon
0.603692	-0.00831719	0.479	0.486	1	preGC-I	GCM1-HUMAN.H10MO.D
0.603823	-0.278751	0.477	0.487	1	preGC-I	PBX1.MA0070.1
0.626045	0.0485989	0.487	0.483	1	preGC-I	GSC2.SwissRegulon
0.643686	0.137259	0.478	0.478	1	preGC-I	INSM1.SwissRegulon
0.651043	-0.0469352	0.488	0.478	1	preGC-I	BHLHE40.MA0464.2
0.661552	-1.03819	0.45	0.445	1	preGC-I	GATA6-HUMAN.H10MO.S
0.670385	0.00349392	0.506	0.505	1	preGC-I	NFYB.MA0502.1
0.675253	-0.514023	0.478	0.499	1	preGC-I	HXC12-HUMAN.H10MO.D
0.696938	-1.24387	0.455	0.438	1	preGC-I	GATA3-HUMAN.H10MO.C
0.719605	-0.407867	0.45	0.446	1	preGC-I	SMAD2-HUMAN.H10MO.C
0.74119	-0.512661	0.464	0.454	1	preGC-I	OVOL1-HUMAN.H10MO.C
0.74119	-0.512661	0.464	0.454	1	preGC-I	OVOL1.SwissRegulon
0.748381	0.0436126	0.469	0.482	1	preGC-I	ZIC1-HUMAN.H10MO.B
0.752237	-0.0583889	0.473	0.47	1	preGC-I	ZNF415.HOMER
0.784295	-1.33968	0.461	0.439	1	preGC-I	FOSL2-HUMAN.H10MO.A
0.784718	-0.0944906	0.478	0.473	1	preGC-I	MYB.SwissRegulon
0.806753	-0.470463	0.475	0.482	1	preGC-I	STAT6-HUMAN.H10MO.C
0.813986	-0.0296287	0.481	0.474	1	preGC-I	IRX2.SwissRegulon
0.847824	-0.260485	0.468	0.468	1	preGC-I	AP2A-HUMAN.H10MO.C
0.849247	-0.0220649	0.469	0.467	1	preGC-I	ELF5.HOMER
0.851828	-11.175	0.427	0.384	1	preGC-I	FOSL1.MA0477.1
0.875715	-7.88128	0.428	0.391	1	preGC-I	FOSL1.SwissRegulon
0.896034	-0.1184	0.456	0.445	1	preGC-I	BCL3.SwissRegulon
0.902371	0.0786769	0.474	0.48	1	preGC-I	GLIS2.MA0736.1
0.904514	-1.0572	0.464	0.453	1	preGC-I	MEF2D.SwissRegulon
0.907686	-0.21229	0.476	0.473	1	preGC-I	FOXL1.SwissRegulon
0.934965	-0.197507	0.481	0.509	1	preGC-I	KLF13-HUMAN.H10MO.D
0.944264	-1.83938	0.467	0.45	1	preGC-I	MEF2C.MA0497.1
0.952649	-0.101785	0.474	0.47	1	preGC-I	MEIS2.MA0774.1
0.981982	0.00962045	0.489	0.489	1	preGC-I	PAX2-HUMAN.H10MO.D
0.994863	-0.0350515	0.483	0.483	1	preGC-I	ZNF410.SwissRegulon
0	12.4044	0.995	0.442	0	sLGR5_female	TCF3.MA0522.2
0	11.8126	0.99	0.438	0	sLGR5_female	ID4.MA0824.1
0	11.4607	0.997	0.437	0	sLGR5_female	TCF4.MA0830.1
0	11.0781	0.997	0.44	0	sLGR5_female	ITF2-HUMAN.H10MO.B
0	10.5496	0.995	0.439	0	sLGR5_female	TCF4.SwissRegulon
0	8.55023	0.987	0.459	0	sLGR5_female	SNAI2.MA0745.1
0	8.45332	0.989	0.448	0	sLGR5_female	ZEB1.MA0103.3
0	7.3401	0.991	0.479	0	sLGR5_female	SNAI1.SwissRegulon
0	6.94416	0.994	0.457	0	sLGR5_female	E2A.HOMER
0	6.73947	0.985	0.452	0	sLGR5_female	SNAI2.SwissRegulon
0	6.37444	0.977	0.461	0	sLGR5_female	MESP1-HUMAN.H10MO.D
0	5.46601	0.979	0.479	0	sLGR5_female	FIGLA.MA0820.1
0	5.3159	0.984	0.423	0	sLGR5_female	HTF4-HUMAN.H10MO.B
0	5.27909	0.984	0.445	0	sLGR5_female	MESP1.SwissRegulon
0	5.10215	0.984	0.439	0	sLGR5_female	TCF3.SwissRegulon
0	5.0841	0.984	0.487	0	sLGR5_female	TWST1-HUMAN.H10MO.D
0	5.0841	0.984	0.487	0	sLGR5_female	TWIST1.SwissRegulon
0	4.52601	0.934	0.432	0	sLGR5_female	ID4-HUMAN.H10MO.D
0	4.28864	0.983	0.446	0	sLGR5_female	TCF12.SwissRegulon
0	3.99652	0.97	0.487	0	sLGR5_female	SNAI1-HUMAN.H10MO.C
0	3.88751	0.963	0.42	0	sLGR5_female	ASCL1.MA1100.1
0	3.6809	0.946	0.419	0	sLGR5_female	NHLH1.MA0048.2
0	3.09535	0.915	0.44	0	sLGR5_female	ID4.SwissRegulon
0	3.04709	0.954	0.427	0	sLGR5_female	NHLH1.SwissRegulon
0	3.03971	0.942	0.437	0	sLGR5_female	MYOD1-HUMAN.H10MO.C
0	3.03971	0.942	0.437	0	sLGR5_female	MYOD1.SwissRegulon
0	3.03088	0.948	0.447	0	sLGR5_female	MYOG-HUMAN.H10MO.D
0	2.97452	0.919	0.42	0	sLGR5_female	TFAP4-HUMAN.H10MO.C
0	2.90321	0.934	0.44	0	sLGR5_female	MYOG.SwissRegulon
0	2.78876	0.897	0.468	0	sLGR5_female	SNAI2-HUMAN.H10MO.C
0	2.78182	0.918	0.453	0	sLGR5_female	SCRT1.MA0743.1
0	2.76253	0.89	0.466	0	sLGR5_female	TBX1.SwissRegulon
0	2.57633	0.927	0.464	0	sLGR5_female	ZEB1.SwissRegulon
0	2.54725	0.931	0.447	0	sLGR5_female	TAL1-HUMAN.H10MO.S
0	2.39108	0.892	0.464	0	sLGR5_female	HEY1.SwissRegulon
0	2.37637	0.903	0.429	0	sLGR5_female	MYF6.SwissRegulon
0	2.26168	0.874	0.456	0	sLGR5_female	HEY2-HUMAN.H10MO.D
0	2.25433	0.956	0.459	0	sLGR5_female	MSC.SwissRegulon
0	2.24842	0.871	0.46	0	sLGR5_female	ZEB1-HUMAN.H10MO.B
0	2.11398	0.937	0.405	0	sLGR5_female	MYF6-HUMAN.H10MO.C
0	2.08325	0.934	0.46	0	sLGR5_female	TFE2-HUMAN.H10MO.C
0	0.547939	0.943	0.459	0	sLGR5_female	MSC.MA0665.1
6.27463e-322	2.05026	0.908	0.447	1.20473e-318	sLGR5_female	ASCL2.SwissRegulon
9.93072e-322	2.19255	0.914	0.509	1.9067e-318	sLGR5_female	NDF1-HUMAN.H10MO.C
3.70242e-307	2.0767	0.885	0.464	7.10864e-304	sLGR5_female	SCRT2.MA0744.1
1.97904e-304	2.17542	0.874	0.47	3.79977e-301	sLGR5_female	TBX4.MA0806.1
1.97904e-304	2.17542	0.874	0.47	3.79977e-301	sLGR5_female	TBX5.MA0807.1
1.97904e-304	2.17542	0.874	0.47	3.79977e-301	sLGR5_female	TBX5.SwissRegulon
1.12206e-301	2.31532	0.876	0.451	2.15435e-298	sLGR5_female	PKNOX2.MA0783.1
3.66561e-292	2.09936	0.865	0.462	7.03796e-289	sLGR5_female	HMX1.SwissRegulon
9.84016e-287	2.17323	0.875	0.463	1.88931e-283	sLGR5_female	TCF21.SwissRegulon
4.22521e-273	2.1709	0.898	0.474	8.1124e-270	sLGR5_female	FIGLA.SwissRegulon
8.14388e-272	2.21528	0.842	0.447	1.56362e-268	sLGR5_female	MEIS3-HUMAN.H10MO.D
9.43387e-266	1.88138	0.845	0.462	1.8113e-262	sLGR5_female	HEY1-HUMAN.H10MO.D
6.11554e-265	1.12408	0.889	0.436	1.17418e-261	sLGR5_female	MYF6.MA0667.1
1.28635e-251	1.84239	0.841	0.471	2.4698e-248	sLGR5_female	T.SwissRegulon
2.21267e-243	-4.37881	0.917	0.437	4.24833e-240	sLGR5_female	ZBTB18.MA0698.1
7.20275e-241	-1.70229	0.911	0.442	1.38293e-237	sLGR5_female	TAL1.SwissRegulon
1.0177e-239	-0.356848	0.887	0.444	1.95399e-236	sLGR5_female	TFAP4.MA0691.1
3.38138e-236	1.65622	0.916	0.496	6.49225e-233	sLGR5_female	TCFL2.HOMER
1.0181e-233	1.89634	0.848	0.479	1.95476e-230	sLGR5_female	FIGLA-HUMAN.H10MO.D
5.45071e-233	-2.49826	0.905	0.442	1.04654e-229	sLGR5_female	SCL.HOMER
6.83022e-233	1.8004	0.835	0.462	1.3114e-229	sLGR5_female	TBX15.SwissRegulon
1.10678e-225	1.76469	0.854	0.458	2.12502e-222	sLGR5_female	SCRT2.SwissRegulon
1.896e-223	1.79409	0.823	0.463	3.64032e-220	sLGR5_female	TBX1.MA0805.1
5.94763e-221	-1.24835	0.893	0.454	1.14195e-217	sLGR5_female	NEUROD1.SwissRegulon
1.59932e-213	1.26898	0.9	0.498	3.07069e-210	sLGR5_female	TCF7L2.MA0523.1
1.20135e-212	1.7911	0.826	0.459	2.30659e-209	sLGR5_female	TGIF1.MA0796.1
3.89464e-212	1.66149	0.823	0.472	7.47771e-209	sLGR5_female	HEY2.SwissRegulon
7.45496e-212	1.47169	0.827	0.451	1.43135e-208	sLGR5_female	MTF1.SwissRegulon
1.25954e-201	1.48208	0.875	0.476	2.41831e-198	sLGR5_female	LEF1.MA0768.1
8.68842e-201	1.65123	0.823	0.456	1.66818e-197	sLGR5_female	TBX5-HUMAN.H10MO.D
5.91681e-200	-3.8899	0.88	0.435	1.13603e-196	sLGR5_female	ZBTB18.HOMER
5.83783e-199	0.363998	0.857	0.447	1.12086e-195	sLGR5_female	ATOH1.SwissRegulon
1.50046e-191	1.63873	0.843	0.437	2.88089e-188	sLGR5_female	BCL11A.SwissRegulon
1.85089e-191	1.39475	0.85	0.454	3.5537e-188	sLGR5_female	TFAP4.SwissRegulon
2.34069e-189	1.98477	0.818	0.411	4.49413e-186	sLGR5_female	RUNX1-HUMAN.H10MO.A
1.47242e-186	1.53308	0.834	0.46	2.82705e-183	sLGR5_female	SIX1.MA1118.1
1.34693e-185	2.37146	0.821	0.427	2.58611e-182	sLGR5_female	NFIC::TLX1.MA0119.1
[truncated: 22,961 more rows]

## Sheet: 4_TF_prioritization
cluster	TF	N_agreement	scRNA_DEGs_hit	scRNA_DEGs_avg_log2FC	scRNA_DEGs_p_val	scRNA_DEGs_p_val_adj	scRNA_DEGs_pct.1	scRNA_DEGs_pct.2	scRNA_TFact_hit	scRNA_TFact_avg_log2FC	scRNA_TFact_p_val	scRNA_TFact_p_val_adj	snATAC_PWM.1	snATAC_TFact_hit	snATAC_TFact_avg_log2FC	snATAC_TFact_p_val	snATAC_TFact_p_val_adj
FetalLeydig-like	YBX1	3	1	0.550848	9.97275e-16	2.81531e-11	0.78	0.88	1	0.16108	2.0004e-09	2.77056e-06	YBX1.SwissRegulon	1	0.306131	3.36226e-14	6.45554e-11
ovarianSurf	ARX	3	1	0.263771	9.06545e-74	2.55918e-69	0.256	0.043	1	0.495352	1.46171e-28	2.02446e-25	ARX-HUMAN.H10MO.D.4	1	2.01501	0	0
ovarianSurf	EMX1	3	1	0.10911	6.85498e-54	1.93516e-49	0.088	0.004	1	0.477445	3.02819e-30	4.19405e-27	EMX1.MA0612.1.4	1	14.264	0	0
ovarianSurf	EMX2	3	1	0.417731	2.43623e-86	6.87748e-82	0.809	0.473	1	0.235716	4.09442e-23	5.67078e-20	EMX2.MA0886.1.4	1	16.3513	0	0
ovarianSurf	HOXD10	3	1	0.100613	1.56609e-12	4.42108e-08	0.087	0.032	1	0.269398	1.83799e-13	2.54562e-10	HOXD10.SwissRegulon.4	1	0.643238	5.58136e-190	1.07162e-186
ovarianSurf	HOXD9	3	1	0.354684	2.59467e-62	7.32476e-58	0.543	0.256	1	0.241946	1.76506e-06	0.00244461	HOXD9.SwissRegulon.4	1	3.51764	0	0
ovarianSurf	LHX2	3	1	0.627812	1.82428e-190	5.14994e-186	0.555	0.119	1	0.320737	2.55629e-42	3.54046e-39	LHX2.MA0700.1.4	1	19.9683	0	0
ovarianSurf	LHX9	3	1	0.607589	1.12989e-149	3.18969e-145	0.813	0.374	1	0.351829	6.07988e-19	8.42063e-16	LHX9.MA0701.1.4	1	13.9414	0	0
ovarianSurf	RELB	3	1	0.162152	1.89428e-21	5.34755e-17	0.225	0.094	1	0.738497	9.1991e-51	1.27408e-47	RELB-HUMAN.H10MO.C.4	1	0.370264	6.76377e-98	1.29864e-94
ovarianSurf	TEAD4	3	1	0.131609	3.61465e-44	1.02042e-39	0.139	0.021	1	0.359955	6.26578e-21	8.67811e-18	TEAD4-HUMAN.H10MO.A.4	1	0.583275	1.72231e-167	3.30684e-164
preGC_I	EGR1	3	1	0.118967	2.8449e-18	8.03114e-14	0.791	0.639	1	0.246049	3.01292e-10	4.1729e-07	EGR1-HUMAN.H10MO.S.8	1	0.445251	1.57222e-128	3.01865e-125
preGC_I	ELK1	3	1	0.508066	5.26301e-98	1.48575e-93	0.693	0.427	1	0.167708	1.69374e-21	2.34582e-18	ELK1.SwissRegulon.8	1	0.704277	3.67633e-245	7.05855e-242
preGC_I	FOXL2	3	1	1.04367	3.77307e-298	1.06514e-293	0.764	0.233	1	0.173543	6.07955e-33	8.42017e-30	FOXL2.HOMER.8	1	2.05539	0	0
preGC_I	JUN	3	1	0.273245	3.79037e-33	1.07002e-28	0.909	0.825	1	0.101327	1.46395e-06	0.00202757	JUN.SwissRegulon.8	1	0.110028	0	0
preGC_I	MAF	3	1	0.288983	3.3882e-37	9.5649e-33	0.504	0.311	1	0.10177	1.44231e-06	0.0019976	MAF.MAF-HUMAN.H10MO.B.8	1	0.283046	1.04229e-55	2.0012e-52
preGC_I	SMAD3	3	1	0.147214	2.93424e-17	8.28335e-13	0.204	0.11	1	0.102271	1.9177e-07	0.000265601	SMAD3.SwissRegulon.8	1	0.136924	2.1467e-10	4.12167e-07
preGC_I	SMARCC2	3	1	0.108174	7.74735e-08	0.00218708	0.412	0.333	1	0.105276	5.14736e-09	7.12909e-06	SMARCC2.SwissRegulon.8	1	0.328565	4.10717e-61	7.88576e-58
preGC_I	SP100	3	1	0.106209	7.91154e-11	2.23343e-06	0.211	0.128	1	0.381812	1.59649e-49	2.21114e-46	SP100.SwissRegulon.8	1	0.357902	1.02403e-97	1.96614e-94
preGC_I	STAT1	3	1	0.333017	1.64726e-45	4.65021e-41	0.368	0.182	1	0.707482	4.66628e-77	6.4628e-74	STAT1-HUMAN.H10MO.S.8	1	0.776517	1.31099e-158	2.5171e-155
preGC_I	STAT3	3	1	0.143902	2.24308e-11	6.33222e-07	0.598	0.499	1	0.471814	4.78321e-59	6.62475e-56	STAT3.MA0144.2.8	1	0.732408	5.0356e-285	9.66836e-282
preGC_I	TFDP1	3	1	0.105945	1.30246e-10	3.67685e-06	0.232	0.147	1	0.229924	1.98423e-31	2.74816e-28	TFDP1.MA1122.1.8	1	0.962542	0	0
preGC_I	USF2	3	1	0.130668	8.52374e-11	2.40625e-06	0.378	0.282	1	0.108239	7.11051e-14	9.84806e-11	USF2-HUMAN.H10MO.A.8	1	0.52332	3.57939e-112	6.87243e-109
preGC_IIa	LHX2	3	1	0.186044	7.16275e-23	2.02204e-18	0.299	0.139	1	0.513545	1.51438e-70	2.09742e-67	LHX2.SwissRegulon.5	1	0.566294	0	0
preGC_IIb	EGR4	3	1	0.396903	4.04571e-37	1.1421e-32	0.165	0.038	1	0.632093	5.77649e-81	8.00044e-78	EGR4.MA0733.1.7	1	0.139029	1.62976e-34	3.12915e-31
preGC_IIb	FOSB	3	1	0.500018	2.03337e-98	5.74021e-94	0.766	0.376	1	0.479811	2.29227e-70	3.1748e-67	FOSB-HUMAN.H10MO.C.7	1	6.95179	8.55144e-60	1.64188e-56
preGC_IIb	JUN	3	1	0.230051	6.01309e-44	1.69749e-39	0.956	0.821	1	0.119816	4.34645e-06	0.00601983	JUN.MA0488.1.7	1	1.55097	2.49019e-26	4.78117e-23
preGC_IIb	JUNB	3	1	0.951708	4.52684e-270	1.27793e-265	0.978	0.637	1	0.575913	5.72142e-84	7.92416e-81	JUNB.MA0490.1.7	1	1.51672	0	0
preGC_IIb	LEF1	3	1	0.252178	1.5826e-41	4.46767e-37	0.67	0.41	1	0.50606	2.4477e-47	3.39006e-44	LEF1-HUMAN.H10MO.C.7	1	1.143	0	0
preGC_IIb	LHX2	3	1	0.23191	1.03452e-34	2.92044e-30	0.349	0.135	1	0.782951	1.97552e-137	2.73609e-134	LHX2.SwissRegulon.7	1	0.737134	0	0
preGC_IIb	LHX9	3	1	0.458425	3.12072e-103	8.80978e-99	0.808	0.375	1	0.258333	5.65291e-31	7.82928e-28	LHX9.SwissRegulon.7	1	0.798949	0	0
preGC_IIb	MYC	3	1	0.194329	5.03189e-21	1.4205e-16	0.37	0.201	1	0.463967	1.39348e-91	1.92998e-88	MYC-HUMAN.H10MO.A.7	1	0.111417	1.05359e-24	2.02289e-21
preGC_IIb	NR2F6	3	1	0.117497	8.71484e-16	2.4602e-11	0.295	0.154	1	0.325351	3.70248e-34	5.12794e-31	NR2F6-HUMAN.H10MO.D.7	1	0.251897	5.89954e-59	1.13271e-55
preGC_IIb	PBX1	3	1	0.299211	6.87996e-50	1.94221e-45	0.717	0.441	1	0.111903	1.59525e-17	2.20943e-14	PBX1.MA0070.1.7	1	0.873952	3.68538e-281	7.07593e-278
preGC_IIb	TGIF1	3	1	0.245516	2.63984e-33	7.45228e-29	0.78	0.584	1	0.641737	4.54223e-87	6.29099e-84	TGIF1.MA0796.1.7	1	0.496362	1.52259e-93	2.92337e-90
preGC_IIb	ZNF410	3	1	0.109855	6.70856e-15	1.89383e-10	0.225	0.109	1	0.1235	2.36357e-13	3.27355e-10	ZNF410.SwissRegulon.7	1	0.143396	7.76703e-20	1.49127e-16
granulosa	FOXJ3	3	1	0.175483	1.33937e-13	3.78104e-09	0.257	0.188	1	0.781951	1.14981e-28	1.59248e-25	FOXJ3-HUMAN.H10MO.S.6	1	1.90692	0	0
granulosa	LHX9	3	1	0.305191	2.35465e-39	6.64719e-35	0.616	0.39	1	0.394408	2.04272e-19	2.82917e-16	LHX9.SwissRegulon.6	1	0.11148	1.57454e-105	3.02311e-102
granulosa	PBX3	3	1	0.317509	1.33461e-58	3.76759e-54	0.292	0.112	1	1.04461	2.97625e-84	4.1221e-81	PBX3-HUMAN.H10MO.B.6	1	0.275049	1.86335e-37	3.57764e-34
granulosa	TEF	3	1	0.136952	2.18725e-18	6.1746e-14	0.139	0.066	1	0.328656	2.02163e-18	2.79996e-15	TEF-HUMAN.H10MO.D.6	1	0.839072	6.67792e-245	1.28216e-241
Sertoli	ARNT2	3	1	0.298489	1.16643e-33	3.29283e-29	0.244	0.149	1	0.241213	6.78496e-09	9.39716e-06	ARNT2-HUMAN.H10MO.D.1	1	0.901216	0	0
Sertoli	ATF3	3	1	0.391626	2.74632e-30	7.75286e-26	0.292	0.169	1	0.273983	5.09073e-43	7.05066e-40	ATF3-HUMAN.H10MO.A.1	1	1.09312	0	0
Sertoli	DMRT1	3	1	0.374912	1.07901e-51	3.04605e-47	0.251	0.11	1	0.528637	6.16378e-114	8.53683e-111	DMRT1.HOMER.1	1	6.36831	0	0
Sertoli	ERF	3	1	0.396018	1.94325e-56	5.4858e-52	0.316	0.178	1	0.196045	1.20985e-23	1.67564e-20	ERF.SwissRegulon.1	1	0.102303	1.98401e-43	3.8093e-40
Sertoli	GATA4	3	1	0.40788	2.47015e-40	6.97324e-36	0.714	0.666	1	0.568711	2.10419e-118	2.91431e-115	GATA4-HUMAN.H10MO.B.1	1	0.265831	1.04482e-161	2.00606e-158
Sertoli	JUND	3	1	0.917776	3.80588e-214	1.0744e-209	0.759	0.497	1	0.222487	8.89381e-14	1.23179e-10	JUND.SwissRegulon.1	1	0.206203	1.86247e-28	3.57594e-25
Sertoli	NFATC3	3	1	0.159314	3.17566e-08	0.000896488	0.165	0.15	1	0.470482	2.84527e-68	3.94069e-65	NFATC3.SwissRegulon.1	1	1.03039	0	0
Sertoli	RELB	3	1	0.255478	2.98924e-27	8.43862e-23	0.171	0.098	1	0.628498	1.52531e-76	2.11256e-73	RELB-HUMAN.H10MO.C.1	1	0.657831	0	0
Sertoli	SOX9	3	1	1.38836	0	0	0.747	0.152	1	1.54301	0	0	SOX9.SwissRegulon.1	1	13.9173	0	0
Sertoli	SREBF1	3	1	0.241967	1.21288e-20	3.42395e-16	0.197	0.141	1	0.280622	6.47087e-13	8.96215e-10	SREBF1.MA0595.1.1	1	0.631704	1.57662e-245	3.02711e-242
Sertoli	SREBF2	3	1	0.480655	1.20676e-66	3.40668e-62	0.412	0.263	1	0.289856	2.65126e-16	3.672e-13	SREBF2.MA0596.1.1	1	0.772547	0	0
sLGR5_female	ELF3	3	1	0.202688	6.61263e-36	1.86674e-31	0.136	0.028	1	0.411934	1.18063e-71	1.63517e-68	ELF3-HUMAN.H10MO.D.11	1	0.311256	1.41849e-18	2.7235e-15
sLGR5_female	ETV1	3	1	0.330782	1.325e-71	3.74048e-67	0.281	0.088	1	0.197263	4.99014e-15	6.91134e-12	ETV1-HUMAN.H10MO.B.11	1	1.04751	6.24612e-124	1.19926e-120
sLGR5_female	OSR1	3	1	0.407142	1.71555e-62	4.84298e-58	0.322	0.089	1	0.29626	4.30035e-20	5.95599e-17	OSR1.SwissRegulon.11	1	0.43683	8.2482e-22	1.58365e-18
sLGR5_female	PROX1	3	1	0.105268	7.39641e-15	2.08801e-10	0.129	0.047	1	0.280321	1.16612e-29	1.61508e-26	PROX1-HUMAN.H10MO.D.11	1	0.66281	1.6201e-60	3.11059e-57
sLGR5_female	XBP1	3	1	0.443301	6.00973e-74	1.69655e-69	0.653	0.396	1	0.158687	6.15203e-06	0.00852056	XBP1-HUMAN.H10MO.C.11	1	0.717546	1.37779e-44	2.64536e-41
sLGR5_female	ZNF232	3	1	0.118469	2.33342e-16	6.58726e-12	0.186	0.092	1	0.286792	3.80212e-27	5.26593e-24	ZNF232.SwissRegulon.11	1	0.347616	2.18011e-13	4.18582e-10
sLGR5_male	E2F4	3	1	0.238087	2.5835e-12	7.29321e-08	0.429	0.235	1	0.137143	1.12664e-11	1.56039e-08	E2F4.MA0470.1.12	1	0.990186	3.87409e-64	7.43826e-61
sLGR5_male	MLX	3	1	0.173665	2.8675e-07	0.00809496	0.321	0.201	1	0.325145	1.42681e-16	1.97613e-13	MLX-HUMAN.H10MO.D.12	1	0.301974	3.52498e-13	6.76796e-10
sLGR5_male	XBP1	3	1	0.344927	2.69278e-14	7.60172e-10	0.621	0.411	1	0.109191	2.54298e-05	0.0352202	XBP1-HUMAN.H10MO.C.12	1	0.514511	1.71527e-12	3.29331e-09
sPAX8e	HEY2	3	1	0.160167	4.47945e-14	1.26455e-09	0.113	0.061	1	0.122298	7.63117e-12	1.05692e-08	HEY2.MA0649.1.13	1	0.587663	4.78882e-22	9.19454e-19
sPAX8e	PAX8	3	1	1.26862	0	0	0.725	0.107	1	0.528738	4.73662e-68	6.56022e-65	PAX8-HUMAN.H10MO.D.13	1	0.752154	3.29683e-26	6.32991e-23
sPAX8e	SMAD1	3	1	0.227929	1.7328e-15	4.89169e-11	0.25	0.195	1	0.226147	1.61589e-07	0.000223801	SMAD1.SwissRegulon.13	1	0.432043	3.34628e-17	6.42485e-14
sPAX8m	BHLHE41	3	1	0.26033	7.994e-34	2.25671e-29	0.236	0.102	1	0.195963	4.94948e-21	6.85502e-18	BHLHE41.MA0636.1.14	1	0.695442	2.02487e-06	0.00388775
sPAX8m	PAX8	3	1	1.44679	0	0	0.855	0.097	1	0.638697	2.14567e-114	2.97175e-111	PAX8-HUMAN.H10MO.D.14	1	1.98566	2.29436e-89	4.40517e-86
sPAX8m	TBX2	3	1	0.378263	1.22249e-79	3.45109e-75	0.297	0.076	1	0.406615	5.54455e-26	7.67921e-23	TBX2.SwissRegulon.14	1	0.568184	2.66111e-10	5.10933e-07
coelEpi	BNC1	2	1	0.504085	1.77202e-165	5.00242e-161	0.383	0.065	1	1.99429	0	0	NA	NA	NA	NA	NA
coelEpi	BNC2	2	1	0.324827	7.11016e-50	2.0072e-45	0.393	0.174	1	2.57053	0	0	NA	NA	NA	NA	NA
coelEpi	CEBPB	2	1	0.513956	1.25281e-101	3.53668e-97	0.378	0.112	1	0.112652	1.22664e-17	1.69889e-14	NA	NA	NA	NA	NA
coelEpi	GATA5	2	1	0.260064	8.30308e-35	2.34396e-30	0.359	0.18	1	0.655564	2.01705e-24	2.79361e-21	NA	NA	NA	NA	NA
coelEpi	GLI3	2	1	0.157914	6.47895e-11	1.82901e-06	0.211	0.141	1	0.368592	1.88511e-22	2.61087e-19	NA	NA	NA	NA	NA
coelEpi	HAND2	2	1	0.140501	1.7596e-17	4.96735e-13	0.206	0.091	1	1.90386	6.91692e-323	9.57993e-320	NA	NA	NA	NA	NA
coelEpi	HOXA3	2	1	0.20864	3.09816e-71	8.74612e-67	0.171	0.016	1	1.00562	3.28333e-80	4.54742e-77	NA	NA	NA	NA	NA
coelEpi	HOXA7	2	1	0.319597	7.32042e-90	2.06656e-85	0.266	0.042	1	0.373428	2.2103e-06	0.00306127	NA	NA	NA	NA	NA
coelEpi	HOXB2	2	1	0.10961	2.73079e-43	7.70902e-39	0.088	0.005	1	1.21893	1.52034e-97	2.10567e-94	NA	NA	NA	NA	NA
coelEpi	HOXC6	2	1	0.16384	3.35958e-31	9.48408e-27	0.185	0.058	1	1.04813	4.45513e-161	6.17035e-158	NA	NA	NA	NA	NA
coelEpi	ID3	2	1	0.56884	9.4131e-32	2.65732e-27	0.495	0.335	1	0.242766	6.40079e-32	8.86509e-29	NA	NA	NA	NA	NA
coelEpi	ID4	2	1	0.514832	1.21361e-59	3.42603e-55	0.521	0.282	1	1.4726	4.95156e-213	6.85791e-210	NA	NA	NA	NA	NA
coelEpi	JDP2	2	1	0.100922	1.07657e-34	3.03915e-30	0.085	0.008	1	1.80243	1.28849e-180	1.78456e-177	NA	NA	NA	NA	NA
coelEpi	JUN	2	1	0.411458	1.00552e-21	2.83857e-17	0.888	0.826	1	0.417793	9.28952e-53	1.2866e-49	NA	NA	NA	NA	NA
coelEpi	MEIS3	2	1	0.149595	5.96423e-22	1.6837e-17	0.173	0.07	1	2.43036	0	0	NA	NA	NA	NA	NA
coelEpi	MYRF	2	1	0.56349	5.28328e-123	1.49147e-118	0.612	0.261	1	1.54359	0	0	NA	NA	NA	NA	NA
coelEpi	NFIB	2	1	0.200795	8.47268e-20	2.39184e-15	0.629	0.483	1	0.807939	2.87927e-84	3.98779e-81	NA	NA	NA	NA	NA
coelEpi	NFIX	2	1	0.104881	1.37103e-08	0.000387041	0.196	0.112	1	1.36249	6.88831e-104	9.54031e-101	NA	NA	NA	NA	NA
coelEpi	NR2F1	2	1	0.393337	2.06713e-127	5.8355e-123	0.25	0.018	1	0.395084	2.06707e-50	2.86289e-47	NA	NA	NA	NA	NA
coelEpi	OSR2	2	1	0.159996	8.8109e-43	2.48732e-38	0.128	0.015	1	2.30541	0	0	NA	NA	NA	NA	NA
coelEpi	PRRX1	2	1	0.571045	1.35347e-135	3.82084e-131	0.464	0.137	1	2.04691	9.72528e-318	1.34695e-314	NA	NA	NA	NA	NA
coelEpi	SOX8	2	1	0.183787	1.84227e-75	5.20072e-71	0.138	0.01	1	0.623045	3.27496e-46	4.53582e-43	NA	NA	NA	NA	NA
coelEpi	TCF21	2	1	0.464801	1.30957e-79	3.69693e-75	0.26	0.07	1	2.41516	0	0	NA	NA	NA	NA	NA
coelEpi	TFDP1	2	1	0.106781	6.37976e-13	1.80101e-08	0.263	0.145	1	0.105195	2.31794e-10	3.21035e-07	NA	NA	NA	NA	NA
coelEpi	TSHZ2	2	1	0.475437	5.92557e-91	1.67279e-86	0.501	0.179	1	1.7735	2.42701e-260	3.3614e-257	NA	NA	NA	NA	NA
coelEpi	TSHZ3	2	1	0.181355	5.48934e-26	1.54964e-21	0.281	0.121	1	2.05725	8.72947e-301	1.20903e-297	NA	NA	NA	NA	NA
coelEpi	ZNF467	2	1	0.185152	1.42071e-59	4.01065e-55	0.17	0.022	1	1.3769	1.05403e-93	1.45983e-90	NA	NA	NA	NA	NA
FetalLeydig-like	ARID5A	2	NA	NA	NA	NA	NA	NA	1	1.20735	7.0124e-136	9.71217e-133	ARID5A.SwissRegulon	1	3.08657	2.47033e-323	4.74303e-320
FetalLeydig-like	ARNT	2	0	0.0575928	0.00654912	1	0.089	0.179	1	0.280787	5.94461e-21	8.23328e-18	ARNT-HUMAN.H10MO.B	1	0.645086	7.85841e-35	1.50881e-31
FetalLeydig-like	ATF4	2	0	-0.0969844	2.58776e-10	7.30524e-06	0.291	0.487	1	0.222046	4.88637e-08	6.76762e-05	ATF4.MA0833.1	1	1.61647	7.63858e-73	1.46661e-69
FetalLeydig-like	ATF5	2	NA	NA	NA	NA	NA	NA	1	0.420773	1.38086e-08	1.91249e-05	ATF5.SwissRegulon	1	1.00688	2.73648e-34	5.25404e-31
FetalLeydig-like	BACH1	2	NA	NA	NA	NA	NA	NA	1	0.266436	2.2622e-12	3.13315e-09	BACH1.SwissRegulon	1	6.86182	0	0
FetalLeydig-like	BCL6	2	NA	NA	NA	NA	NA	NA	1	0.420661	1.95832e-27	2.71228e-24	BCL6.SwissRegulon	1	1.31817	2.83702e-55	5.44708e-52
FetalLeydig-like	BHLHE22	2	NA	NA	NA	NA	NA	NA	1	0.163575	6.92765e-15	9.5948e-12	BHLHE22.SwissRegulon	1	1.85092	1.73295e-150	3.32726e-147
FetalLeydig-like	BHLHE40	2	0	-0.155134	2.42298e-08	0.000684008	0.065	0.147	1	0.747222	8.36019e-68	1.15789e-64	BHLHE40.MA0464.2	1	1.58661	3.42974e-120	6.5851e-117
FetalLeydig-like	BHLHE41	2	0	-0.095109	3.68049e-09	0.0001039	0.022	0.115	1	1.23631	3.39774e-142	4.70587e-139	BHLHE41.SwissRegulon	1	2.5784	3.71891e-207	7.1403e-204
FetalLeydig-like	CEBPA	2	NA	NA	NA	NA	NA	NA	1	0.520907	1.92173e-42	2.66159e-39	CEBPA-HUMAN.H10MO.A	1	3.92999	1.5481e-246	2.97235e-243
FetalLeydig-like	CEBPB	2	NA	NA	NA	NA	NA	NA	1	0.270083	1.41668e-22	1.9621e-19	CEBPB-HUMAN.H10MO.A	1	4.55753	1.53416e-231	2.94559e-228
FetalLeydig-like	CLOCK	2	0	-0.0503778	0.000332418	1	0.048	0.11	1	0.300702	7.95371e-37	1.10159e-33	CLOCK.SwissRegulon	1	1.81237	7.7709e-141	1.49201e-137
FetalLeydig-like	CREM	2	0	0.0995987	0.908827	1	0.259	0.331	1	0.673108	1.12462e-70	1.55759e-67	CREM-HUMAN.H10MO.C	1	1.33282	1.35091e-97	2.59374e-94
FetalLeydig-like	DLX4	2	NA	NA	NA	NA	NA	NA	1	0.90685	6.13745e-108	8.50036e-105	DLX4.SwissRegulon	1	0.471042	3.70551e-25	7.11457e-22
FetalLeydig-like	DMBX1	2	NA	NA	NA	NA	NA	NA	1	0.886196	1.0456e-97	1.44816e-94	DMBX1.SwissRegulon	1	1.28725	1.2338e-89	2.3689e-86
FetalLeydig-like	E2F6	2	NA	NA	NA	NA	NA	NA	1	0.410164	1.41887e-26	1.96514e-23	E2F6.HOMER	1	1.83699	8.88649e-94	1.70621e-90
FetalLeydig-like	ELK3	2	NA	NA	NA	NA	NA	NA	1	1.26559	6.75885e-136	9.361e-133	ELK3.MA0759.1	1	1.90918	1.49685e-183	2.87395e-180
FetalLeydig-like	ERF	2	NA	NA	NA	NA	NA	NA	1	1.02849	3.86589e-89	5.35426e-86	ERF.MA0760.1	1	2.20342	1.84386e-156	3.54022e-153
FetalLeydig-like	ERG	2	NA	NA	NA	NA	NA	NA	1	0.543616	6.20918e-07	0.000859971	ERG.SwissRegulon	1	3.84656	8.69472e-139	1.66939e-135
FetalLeydig-like	ETS2	2	0	-0.124632	1.86118e-08	0.00052541	0.03	0.106	1	0.126217	5.11255e-06	0.00708088	ETS2-HUMAN.H10MO.C	1	0.869503	2.65979e-30	5.10681e-27
FetalLeydig-like	ETV3	2	NA	NA	NA	NA	NA	NA	1	0.989964	9.43559e-103	1.30683e-99	ETV3.MA0763.1	1	1.20897	2.54208e-100	4.8808e-97
FetalLeydig-like	ETV7	2	NA	NA	NA	NA	NA	NA	1	0.577465	4.53771e-67	6.28472e-64	ETV7.SwissRegulon	1	1.25079	6.7258e-101	1.29135e-97
FetalLeydig-like	FEV	2	NA	NA	NA	NA	NA	NA	1	0.915132	2.38198e-69	3.29904e-66	FEV-HUMAN.H10MO.C	1	2.24884	2.17878e-86	4.18326e-83
FetalLeydig-like	FOS	2	0	-1.20857	1.4079e-97	3.97451e-93	0.341	0.783	1	0.502828	8.79942e-44	1.21872e-40	FOS.MA0476.1	1	1.9857	0	0
FetalLeydig-like	FOXA2	2	NA	NA	NA	NA	NA	NA	1	0.612796	1.58443e-65	2.19444e-62	FOXA2.SwissRegulon	1	1.95287	3.40642e-176	6.54032e-173
FetalLeydig-like	FOXJ1	2	NA	NA	NA	NA	NA	NA	1	0.30049	2.99818e-09	4.15248e-06	FOXJ1.SwissRegulon	1	4.43404	0	0
FetalLeydig-like	FOXN1	2	NA	NA	NA	NA	NA	NA	1	0.873769	3.55027e-53	4.91713e-50	FOXN1.SwissRegulon	1	0.833668	5.13386e-59	9.85701e-56
[truncated: 93,605 more rows]
