# Supplementary material for: Single-cell roadmap of human gonadal development
Source: Research Square preprint supplement (doi:10.21203/rs.3.rs-496470/v1), 2021-05-21
Supplement: Supplementary file 8 [file 8d2e8e39975bd08b72eacb0a.xlsx]

## Sheet: 1_macaque_Zhao2020
gene	cluster	geneFrequency	geneFrequencyOutsideCluster	geneFrequencySecondBest	geneFrequencyGlobal	secondBestClusterName	tfidf	idf	qval
GIP	PGC	0.918919	0.0140198	0.0600632	0.0221807	Oogonia_STRA8	3.49973	3.80853	6.98137e-162
POU5F1	PGC	0.963964	0.0211527	0.2	0.0296555	Oocyte	3.39133	3.51811	6.50584e-161
NANOG	PGC	0.783784	0.0104124	0.0505796	0.0173871	Oogonia_STRA8	3.17591	4.05203	7.31552e-135
DPEP2	PGC	0.756757	0.00934656	0.0638298	0.0160871	Macrophages	3.12521	4.12974	3.15256e-131
TRIML2	PGC	0.837838	0.0172993	0.0821918	0.0246994	Oogonia_STRA8	3.10082	3.70098	4.38342e-133
CRABP1	PGC	0.738739	0.0113143	0.0358272	0.0178746	Oogonia_STRA8	2.97296	4.02438	1.13579e-121
DPPA4	PGC	0.900901	0.0291875	0.153846	0.0370491	Oogonia_STRA8	2.96893	3.29551	7.72147e-131
TFAP2C	PGC	0.657658	0.00557514	0.0315789	0.011456	Oocyte	2.93923	4.46924	2.85028e-119
TMC5	PGC	0.738739	0.0124621	0.168421	0.019012	Oocyte	2.92739	3.96268	4.47465e-119
PERP	PGC	0.810811	0.0266459	0.105263	0.0337179	Oocyte	2.74843	3.38973	2.63136e-112
OLFM1	PGC	0.684685	0.0204968	0.0526316	0.0264868	Oocyte	2.48616	3.63111	7.36627e-93
TP53I3	PGC	0.684685	0.0214807	0.0558483	0.0274618	Oogonia_STRA8	2.46141	3.59496	1.37371e-91
L1TD1	PGC	0.747748	0.0320571	0.187566	0.0385115	Oogonia_STRA8	2.43526	3.2568	1.7678e-92
MGARP	PGC	0.720721	0.0287776	0.0661654	0.0350179	Supporting	2.41578	3.3519	2.21693e-90
TRIM71	PGC	0.720721	0.0299254	0.189474	0.0361553	Oocyte	2.39274	3.31993	3.36421e-89
SOX15	PGC	0.567568	0.0118062	0.0200521	0.0168183	Mesenchymal	2.31868	4.08529	1.84873e-82
GPHA2	PGC	0.702703	0.0358285	0.0631579	0.0418427	Oocyte	2.23026	3.17384	3.83543e-80
KIT	PGC	0.702703	0.0382881	0.252632	0.0442801	Oocyte	2.19048	3.11722	3.95295e-78
ELOVL6	PGC	0.936937	0.0895302	0.256642	0.0971726	Supporting	2.18425	2.33127	1.88927e-94
SNX10	PGC	0.657658	0.0359925	0.105263	0.041599	Oocyte	2.09114	3.17968	1.20609e-71
ACTG2	PGC	0.558559	0.019431	0.0398437	0.0242931	Mesenchymal	2.07648	3.71756	2.30206e-69
LIN28A	PGC	0.423423	0.00418136	0.0210748	0.0079623	Oogonia_STRA8	2.04642	4.83304	1.08509e-70
TTC36	PGC	0.423423	0.00426334	0.010142	0.00804355	Mesothelial	2.04212	4.82288	1.96588e-70
ADTRP	PGC	0.378378	0.00122981	0.0212766	0.00463113	Macrophages	2.03377	5.37495	2.75704e-74
SOX17	PGC	0.576577	0.0248422	0.4125	0.029818	Endothelial	2.02531	3.51264	7.48303e-67
SLC47A1	PGC	0.441441	0.00672296	0.0210748	0.0106435	Oogonia_STRA8	2.00538	4.54281	2.65096e-67
SMAGP	PGC	0.594595	0.0299254	0.371875	0.0350179	Endothelial	1.99302	3.3519	1.99107e-65
DPP4	PGC	0.513514	0.0168074	0.0875	0.021287	Endothelial	1.97685	3.84966	2.96532e-64
CD52	PGC	0.657658	0.0450111	0.982659	0.0505362	Erythroid	1.96315	2.98506	2.45689e-65
PTPRZ1	PGC	0.441441	0.00860867	0.0442571	0.0125122	Oogonia_STRA8	1.93398	4.38105	3.07777e-63
DCAF4	PGC	0.630631	0.0420595	0.0937829	0.0473676	Oogonia_STRA8	1.92331	3.04982	1.10806e-62
TSPAN12	PGC	0.594595	0.0359105	0.28125	0.040949	Endothelial	1.89998	3.19543	8.20884e-61
DSG2	PGC	0.783784	0.0830532	0.389474	0.0893728	Oocyte	1.89279	2.41494	2.4437e-67
FERMT1	PGC	0.459459	0.0124621	0.0588235	0.0164933	Mesothelial	1.88599	4.1048	3.78949e-60
FGFR3	PGC	0.63964	0.0493564	0.23393	0.0546799	Oogonia_STRA8	1.85896	2.90626	9.13853e-60
SLC29A1	PGC	0.522523	0.0243503	0.046875	0.028843	Endothelial	1.85281	3.54589	7.30622e-58
GLDC	PGC	0.414414	0.00828072	0.0230576	0.0119435	Supporting	1.83485	4.42757	1.28771e-58
ETV4	PGC	0.423423	0.0101664	0.136842	0.0138934	Oocyte	1.8107	4.27634	5.41664e-57
HMOX1	PGC	0.504505	0.0250881	0.191489	0.0294118	Macrophages	1.77906	3.52636	3.57552e-54
LOXL2	PGC	0.657658	0.0631303	0.26875	0.068492	Endothelial	1.76321	2.68104	1.10552e-55
S100P	PGC	0.333333	0.00229565	0.037234	0.00528112	Macrophages	1.74787	5.24362	1.66849e-58
MYO10	PGC	0.693694	0.0755104	0.203008	0.0810855	Supporting	1.74273	2.51225	6.34003e-56
MORC1	PGC	0.432432	0.0143478	0.0764977	0.0181183	Oogonia_meiotic	1.73441	4.01083	9.93881e-53
GMPR	PGC	0.828829	0.11798	0.673684	0.124391	Oocyte	1.72755	2.08433	2.22318e-62
CPVL	PGC	0.675676	0.0749365	0.178947	0.0803542	Supporting	1.70359	2.52131	2.00748e-53
SLC23A2	PGC	0.612613	0.0570632	0.0927318	0.0620734	Supporting	1.70272	2.77944	1.20806e-51
UNG	PGC	0.900901	0.152087	0.457323	0.15884	Oogonia_STRA8	1.65753	1.83986	5.61616e-65
TXNRD1	PGC	0.792793	0.120685	0.287234	0.126747	Macrophages	1.63756	2.06556	8.71595e-56
NR6A1	PGC	0.45045	0.0227925	0.0727081	0.0266493	Oogonia_STRA8	1.63288	3.62499	2.81906e-47
ANGPTL4	PGC	0.747748	0.106912	0.240625	0.112691	Mesenchymal	1.63241	2.18311	4.26189e-53
ABHD12	PGC	0.81982	0.131426	0.315789	0.137634	Oocyte	1.62583	1.98316	5.96828e-57
FAM184A	PGC	0.630631	0.071411	0.221286	0.0764543	Oogonia_STRA8	1.62139	2.57106	3.20375e-48
RAB43	PGC	0.585586	0.0596048	0.140625	0.0643484	Endothelial	1.60652	2.74344	1.57779e-46
TBC1D1	PGC	0.558559	0.05198	0.157895	0.0565486	Oocyte	1.60455	2.87266	5.04075e-46
DAZL	PGC	0.756757	0.114618	0.454162	0.120409	Oogonia_STRA8	1.60195	2.11686	3.99166e-52
MKRN1	PGC	0.513514	0.0400098	0.127168	0.0442801	Erythroid	1.60073	3.11722	1.77243e-45
CTSV	PGC	0.756757	0.114864	0.341412	0.120653	Oogonia_STRA8	1.60042	2.11483	4.54436e-52
CRACR2B	PGC	0.459459	0.0277117	0.153125	0.0316055	Endothelial	1.58717	3.45443	6.16716e-45
CYTH1	PGC	0.531532	0.0466508	0.148936	0.0510237	Macrophages	1.58155	2.97546	1.12746e-44
PLAU	PGC	0.441441	0.0244322	0.15	0.028193	Endothelial	1.57536	3.56868	1.49825e-44
PDPN	PGC	0.657658	0.0865787	0.311359	0.091729	Mesothelial	1.57109	2.38892	1.24468e-46
NUDT11	PGC	0.621622	0.0750184	0.126775	0.079948	Mesothelial	1.57045	2.52638	1.3466e-45
UPP1	PGC	0.396396	0.0159056	0.10625	0.019337	Endothelial	1.56407	3.94573	8.28681e-45
DMRT1	PGC	0.432432	0.0232024	0.179136	0.0268931	Oogonia_STRA8	1.56363	3.61589	4.33953e-44
FBLN2	PGC	0.522523	0.0460769	0.113804	0.0503737	Oogonia_STRA8	1.56145	2.98829	1.11203e-43
CECR2	PGC	0.441441	0.0254981	0.0947368	0.0292493	Oocyte	1.55913	3.5319	9.23086e-44
IGFBP6	PGC	0.747748	0.12003	0.26901	0.125691	Mesenchymal	1.55078	2.07393	2.69412e-49
CHGB	PGC	0.405405	0.0186931	0.085353	0.0221807	Oogonia_STRA8	1.544	3.80853	1.29027e-43
PCOLCE2	PGC	0.477477	0.0363204	0.221053	0.040299	Oocyte	1.53338	3.21143	2.84465e-42
PRDM1	PGC	0.423423	0.0236944	0.207447	0.0272993	Macrophages	1.5247	3.60089	2.50837e-42
PLPP2	PGC	0.396396	0.0181192	0.0691489	0.0215307	Macrophages	1.52148	3.83827	1.09735e-42
MAFG	PGC	0.828829	0.156268	0.285714	0.162333	Supporting	1.5069	1.8181	5.03166e-52
LIN28B	PGC	0.414414	0.0228745	0.107482	0.0264056	Oogonia_STRA8	1.50606	3.63418	1.43981e-41
ZNF91	PGC	0.675676	0.10396	0.192481	0.109116	Supporting	1.49685	2.21534	8.11486e-44
RBM46	PGC	0.846847	0.16996	0.705263	0.176064	Oocyte	1.47089	1.73691	1.20806e-51
ACSL4	PGC	0.567568	0.0710011	0.18617	0.0754794	Macrophages	1.46654	2.5839	9.31784e-40
USP28	PGC	0.675676	0.111667	0.169371	0.116753	Mesothelial	1.45114	2.14769	9.61636e-42
ZNF217	PGC	0.774775	0.151841	0.281947	0.157459	Mesothelial	1.43224	1.84859	3.13041e-45
CD9	PGC	0.702703	0.125113	0.484787	0.130322	Mesothelial	1.43193	2.03775	7.19961e-42
BSPRY	PGC	0.324324	0.00926457	0.0608295	0.0121059	Oogonia_meiotic	1.43159	4.41406	1.56876e-40
SRGAP1	PGC	0.513514	0.0574731	0.125313	0.061586	Supporting	1.43133	2.78732	1.47038e-37
NLRP2	PGC	0.72973	0.135853	0.8	0.141209	Oocyte	1.42846	1.95751	7.50785e-43
CPEB1	PGC	0.648649	0.106584	0.652632	0.111472	Oocyte	1.42312	2.19398	1.29952e-39
FUOM	PGC	0.576577	0.0804296	0.207447	0.0849041	Macrophages	1.42197	2.46623	7.15753e-38
TET1	PGC	0.882883	0.194064	0.302083	0.200276	Mesenchymal	1.41973	1.60806	4.04978e-52
TEAD4	PGC	0.414414	0.0294335	0.175	0.0329054	Endothelial	1.41486	3.41412	3.55034e-37
DND1	PGC	0.522523	0.0626384	0.442105	0.0667858	Oocyte	1.41408	2.70626	7.52757e-37
ELAVL2	PGC	0.774775	0.157334	0.642105	0.162902	Oocyte	1.40591	1.81461	4.87566e-44
HDC	PGC	0.297297	0.00623104	0.0631579	0.00885603	Oocyte	1.40522	4.72666	1.5155e-40
MDN1	PGC	0.630631	0.104288	0.209217	0.109035	Oogonia_meiotic	1.39753	2.21609	6.0885e-38
OLFM2	PGC	0.540541	0.071329	0.132832	0.0755606	Supporting	1.39612	2.58282	3.38198e-36
SKAP2	PGC	0.648649	0.111421	0.346681	0.116266	Oogonia_STRA8	1.39581	2.15188	2.23506e-38
PHF8	PGC	0.702703	0.132328	0.380645	0.137472	Oogonia_meiotic	1.3944	1.98434	3.55504e-40
MCM4	PGC	0.657658	0.115356	0.437302	0.120247	Oogonia_STRA8	1.39306	2.11821	1.59812e-38
HDAC5	PGC	0.720721	0.140444	0.226566	0.145678	Supporting	1.38837	1.92636	1.21864e-40
HIC2	PGC	0.54955	0.0760843	0.119298	0.0803542	Supporting	1.38558	2.52131	7.95156e-36
SALL4	PGC	0.324324	0.0113143	0.0631579	0.0141371	Oocyte	1.38128	4.25895	6.45889e-38
CTDP1	PGC	0.441441	0.0413216	0.106383	0.0449301	Macrophages	1.36964	3.10265	9.19679e-35
SERPINB6	PGC	0.792793	0.172993	0.3599	0.178583	Supporting	1.36575	1.7227	3.08688e-43
CENPF	PGC	0.873874	0.203657	0.565859	0.209701	Oogonia_STRA8	1.36505	1.56207	8.21768e-49
SAP25	Oogonia_STRA8	0.586934	0.0866273	0.477477	0.125203	PGC	1.21954	2.07782	4.97469e-281
NLRP7	Oogonia_STRA8	0.573235	0.103618	0.852632	0.139828	Oocyte	1.12775	1.96734	1.65249e-237
TUBB2B	Oogonia_STRA8	0.475237	0.0842504	0.378378	0.114397	PGC	1.03035	2.16808	1.47101e-188
ZGLP1	Oogonia_STRA8	0.322445	0.0200722	0.178947	0.0433864	Oocyte	1.01171	3.13761	1.05546e-208
CENPH	Oogonia_STRA8	0.5353	0.121754	0.534562	0.15364	Oogonia_meiotic	1.00269	1.87314	7.28495e-180
RBM46	Oogonia_STRA8	0.557429	0.144203	0.846847	0.176064	PGC	0.968201	1.73691	1.68561e-168
CDKN3	Oogonia_STRA8	0.389884	0.0582798	0.396396	0.0838479	PGC	0.966425	2.47875	5.72406e-167
DAZL	Oogonia_STRA8	0.454162	0.0925258	0.756757	0.120409	PGC	0.961397	2.11686	1.21081e-159
ASB9	Oogonia_STRA8	0.283456	0.0144379	0.108108	0.0351804	PGC	0.948804	3.34727	2.3337e-194
NLRP2	Oogonia_STRA8	0.483667	0.112598	0.8	0.141209	Oocyte	0.946785	1.95751	6.06336e-154
SMC1B	Oogonia_STRA8	0.651212	0.206092	0.850691	0.240413	Oogonia_meiotic	0.928236	1.4254	6.82816e-171
CKB	Oogonia_STRA8	0.558483	0.159521	0.756757	0.190283	PGC	0.926659	1.65924	1.95158e-152
MCM4	Oogonia_STRA8	0.437302	0.0937583	0.657658	0.120247	PGC	0.926297	2.11821	9.16205e-146
ELAVL2	Oogonia_STRA8	0.507903	0.134079	0.774775	0.162902	PGC	0.921644	1.81461	2.54778e-145
CENPF	Oogonia_STRA8	0.565859	0.179945	0.873874	0.209701	PGC	0.883912	1.56207	2.9468e-137
MKI67	Oogonia_STRA8	0.376185	0.0725416	0.306306	0.0959539	PGC	0.881737	2.34389	1.39843e-132
MAD2L1	Oogonia_STRA8	0.498419	0.144643	0.484211	0.171921	Oocyte	0.877578	1.76072	7.65094e-128
UBE2C	Oogonia_STRA8	0.383562	0.0813452	0.505263	0.104647	Oocyte	0.86576	2.25716	3.02636e-125
TOP2A	Oogonia_STRA8	0.674394	0.246765	0.764977	0.279737	Oogonia_meiotic	0.859115	1.27391	7.70587e-151
SDF2L1	Oogonia_STRA8	0.485774	0.144907	0.423423	0.171189	PGC	0.857384	1.76498	1.10367e-119
PGP	Oogonia_STRA8	0.485774	0.149133	0.693694	0.175089	PGC	0.846442	1.74246	1.15399e-115
DERL3	Oogonia_STRA8	0.389884	0.0910291	0.310599	0.114072	Oogonia_meiotic	0.846409	2.17092	5.2817e-117
DKC1	Oogonia_STRA8	0.554268	0.189805	0.522523	0.217907	PGC	0.84453	1.52369	2.98266e-121
CENPU	Oogonia_STRA8	0.55216	0.189277	0.721659	0.217257	Oogonia_meiotic	0.842969	1.52667	2.02368e-120
UNG	Oogonia_STRA8	0.457323	0.133903	0.900901	0.15884	PGC	0.841411	1.83986	7.3155e-113
SHMT1	Oogonia_STRA8	0.33509	0.0601285	0.486486	0.0813292	PGC	0.840823	2.50925	1.43309e-122
SCML2	Oogonia_STRA8	0.407798	0.105995	0.351351	0.129266	PGC	0.834308	2.04589	3.96167e-111
AURKC	Oogonia_STRA8	0.303477	0.0449864	0.347368	0.0649171	Oocyte	0.829902	2.73464	1.19622e-125
HMGB3	Oogonia_STRA8	0.603793	0.223787	0.652632	0.253087	Oocyte	0.829624	1.37402	8.78254e-124
CCNB2	Oogonia_STRA8	0.367756	0.0831059	0.4	0.105054	Oocyte	0.828658	2.25328	2.0232e-112
DDX4	Oogonia_STRA8	0.484721	0.157848	0.702703	0.183052	PGC	0.823049	1.69799	3.62818e-107
APOO	Oogonia_STRA8	0.452055	0.138128	0.54955	0.162333	PGC	0.821882	1.8181	1.101e-105
ABHD10	Oogonia_STRA8	0.421496	0.121754	0.526316	0.144865	Oocyte	0.814311	1.93195	3.84918e-103
DMRTB1	Oogonia_STRA8	0.310854	0.0529976	0.258986	0.0728794	Oogonia_meiotic	0.81411	2.61895	6.6571e-117
REC8	Oogonia_STRA8	0.248683	0.0207765	0.0562212	0.038349	Oogonia_meiotic	0.810961	3.26103	5.83728e-139
FABP5	Oogonia_STRA8	0.746048	0.304164	0.936937	0.338235	PGC	0.808727	1.08401	5.04507e-155
CKAP2	Oogonia_STRA8	0.369863	0.0954309	0.576577	0.116591	PGC	0.794867	2.14908	2.97458e-99
BOP1	Oogonia_STRA8	0.356164	0.0870675	0.387387	0.107816	PGC	0.793295	2.22733	3.18795e-100
PSMG4	Oogonia_STRA8	0.480506	0.170702	0.756757	0.194589	PGC	0.786524	1.63687	3.7511e-94
CALY	Oogonia_STRA8	0.253952	0.0279074	0.0571429	0.0453364	Oogonia_meiotic	0.785636	3.09365	8.09149e-124
TYMS	Oogonia_STRA8	0.375132	0.102386	0.557895	0.123416	Oocyte	0.78485	2.0922	4.85587e-95
CLSPN	Oogonia_STRA8	0.363541	0.0962233	0.443318	0.116835	Oogonia_meiotic	0.78052	2.147	1.35345e-94
CYP26A1	Oogonia_STRA8	0.244468	0.0241218	0.216216	0.0411115	PGC	0.780211	3.19147	8.83764e-126
NUDT1	Oogonia_STRA8	0.43098	0.141826	0.576577	0.164121	PGC	0.778846	1.80715	2.30754e-90
RPA2	Oogonia_STRA8	0.471022	0.168677	0.540541	0.191989	PGC	0.777336	1.65032	1.46078e-90
MCM7	Oogonia_STRA8	0.511064	0.197112	0.54955	0.221319	PGC	0.770761	1.50815	7.03127e-91
COPRS	Oogonia_STRA8	0.711275	0.308742	0.810811	0.339779	PGC	0.767793	1.07946	3.32222e-128
KNL1	Oogonia_STRA8	0.45627	0.166652	0.625806	0.188983	Oogonia_meiotic	0.760191	1.6661	2.95169e-84
MAP7D3	Oogonia_STRA8	0.519494	0.207413	0.610526	0.231475	Oocyte	0.760166	1.46328	4.20231e-88
BAG1	Oogonia_STRA8	0.553214	0.228629	0.468468	0.253656	PGC	0.758885	1.37178	2.08676e-91
FAM216A	Oogonia_STRA8	0.416228	0.140241	0.610138	0.161521	Oogonia_meiotic	0.758833	1.82312	1.15962e-83
OARD1	Oogonia_STRA8	0.506849	0.200282	0.783784	0.223919	PGC	0.758484	1.49647	1.94579e-86
TEX30	Oogonia_STRA8	0.583772	0.246853	0.78341	0.272831	Oogonia_meiotic	0.758264	1.2989	1.41077e-95
HERC5	Oogonia_STRA8	0.657534	0.287789	0.715207	0.316298	Oogonia_meiotic	0.756868	1.15107	9.42187e-110
CDC20	Oogonia_STRA8	0.306639	0.066203	0.157895	0.0847416	Oocyte	0.756829	2.46815	1.24587e-94
HELLS	Oogonia_STRA8	0.512118	0.206972	0.81982	0.2305	PGC	0.751534	1.4675	1.40361e-84
DTYMK	Oogonia_STRA8	0.419389	0.146228	0.567568	0.16729	PGC	0.749879	1.78803	1.41696e-80
MCM6	Oogonia_STRA8	0.376185	0.116295	0.459459	0.136334	PGC	0.749605	1.99265	2.37223e-82
SKAP2	Oogonia_STRA8	0.346681	0.0970156	0.648649	0.116266	PGC	0.746014	2.15188	6.13244e-84
DLGAP5	Oogonia_STRA8	0.396207	0.133727	0.523502	0.153965	Oogonia_meiotic	0.741315	1.87103	2.44357e-78
RFC3	Oogonia_STRA8	0.375132	0.119201	0.459459	0.138934	PGC	0.740419	1.97376	3.08939e-79
MRPL20	Oogonia_STRA8	0.62803	0.281011	0.810811	0.307767	PGC	0.740077	1.17841	1.60989e-97
ECI1	Oogonia_STRA8	0.435195	0.161722	0.603604	0.182808	PGC	0.739535	1.69932	4.62097e-77
TPX2	Oogonia_STRA8	0.349842	0.102122	0.432432	0.121222	PGC	0.738213	2.11013	8.57234e-81
KPNA2	Oogonia_STRA8	0.587987	0.259706	0.631579	0.285018	Oocyte	0.738044	1.2552	1.44773e-89
KLHL35	Oogonia_STRA8	0.265543	0.0453385	0.297297	0.0623172	PGC	0.737018	2.77552	1.03544e-97
POLE3	Oogonia_STRA8	0.44784	0.172198	0.756757	0.193451	PGC	0.735679	1.64273	5.57437e-76
HEBP2	Oogonia_STRA8	0.51844	0.220706	0.540541	0.243663	PGC	0.732023	1.41197	8.04886e-79
PSMD10	Oogonia_STRA8	0.419389	0.156352	0.493088	0.176633	Oogonia_meiotic	0.727086	1.73368	5.13948e-73
NCAPG	Oogonia_STRA8	0.3804	0.130029	0.468203	0.149334	Oogonia_meiotic	0.723359	1.90157	4.20333e-73
CTSV	Oogonia_STRA8	0.341412	0.10221	0.756757	0.120653	PGC	0.72203	2.11483	4.29749e-76
SGO1	Oogonia_STRA8	0.281349	0.0600405	0.223963	0.0771043	Oogonia_meiotic	0.720983	2.5626	1.22974e-86
GMNN	Oogonia_STRA8	0.347734	0.107492	0.389474	0.126016	Oocyte	0.72028	2.07135	9.19758e-75
VRK1	Oogonia_STRA8	0.3804	0.134695	0.452632	0.15364	Oocyte	0.712545	1.87314	1.52592e-69
DPEP3	Oogonia_STRA8	0.342466	0.107844	0.44977	0.125934	Oogonia_meiotic	0.709587	2.07199	1.13649e-71
CENPX	Oogonia_STRA8	0.360379	0.121402	0.45045	0.139828	PGC	0.70899	1.96734	9.6007e-70
SPC25	Oogonia_STRA8	0.240253	0.0372392	0.135135	0.0528924	PGC	0.706222	2.9395	6.5077e-94
PPAT	Oogonia_STRA8	0.347734	0.115063	0.531532	0.133003	PGC	0.701514	2.01738	2.15288e-68
MCUB	Oogonia_STRA8	0.332982	0.104058	0.452632	0.121709	Oocyte	0.7013	2.10612	5.78215e-70
ACAT1	Oogonia_STRA8	0.488936	0.217449	0.666667	0.238382	PGC	0.701077	1.43388	8.0414e-67
UCHL1	Oogonia_STRA8	0.381454	0.143234	0.736842	0.161602	Oocyte	0.695245	1.82262	7.31581e-64
ESCO2	Oogonia_STRA8	0.337197	0.111806	0.537327	0.129184	Oogonia_meiotic	0.690079	2.04652	1.11709e-65
SLC25A31	Oogonia_STRA8	0.297155	0.0822255	0.421053	0.0987975	Oocyte	0.687819	2.31468	8.01307e-71
AURKAIP1	Oogonia_STRA8	0.580611	0.2833	0.711712	0.306224	PGC	0.687118	1.18344	3.14915e-72
COX20	Oogonia_STRA8	0.487882	0.22634	0.747748	0.246506	PGC	0.683214	1.40037	2.50537e-61
STAG3	Oogonia_STRA8	0.28451	0.0745664	0.348387	0.090754	Oogonia_meiotic	0.682711	2.3996	1.50577e-71
FGFR3	Oogonia_STRA8	0.23393	0.0397042	0.63964	0.0546799	PGC	0.679863	2.90626	2.79542e-85
LRPPRC	Oogonia_STRA8	0.550053	0.26939	0.873874	0.29103	PGC	0.678946	1.23433	1.07292e-65
CCDC112	Oogonia_STRA8	0.421496	0.181354	0.468468	0.19987	PGC	0.678646	1.61009	8.48186e-58
COMMD8	Oogonia_STRA8	0.319283	0.103266	0.442105	0.119922	Oocyte	0.677173	2.12091	1.39795e-63
SPRYD7	Oogonia_STRA8	0.359326	0.135135	0.459459	0.152421	PGC	0.67593	1.88111	4.51535e-59
CCDC117	Oogonia_STRA8	0.421496	0.182851	0.675676	0.201251	PGC	0.675743	1.6032	6.34446e-57
DIABLO	Oogonia_STRA8	0.506849	0.243419	0.666667	0.263731	PGC	0.675542	1.33283	2.07998e-60
HAUS7	Oogonia_STRA8	0.252898	0.0544062	0.273684	0.0697108	Oocyte	0.673568	2.6634	2.95857e-76
TIMM17B	Oogonia_STRA8	0.51844	0.25372	0.846847	0.274131	PGC	0.67094	1.29415	4.86536e-60
CENPE	Oogonia_STRA8	0.300316	0.0918215	0.421053	0.107897	Oocyte	0.668676	2.22658	1.3617e-63
CHMP2A	Oogonia_STRA8	0.649104	0.333568	0.603604	0.357897	PGC	0.666961	1.02751	3.55276e-78
C12orf49	Oogonia_STRA8	0.395153	0.167884	0.477477	0.185408	PGC	0.66591	1.6852	2.77454e-54
MTHFD2	Oogonia_STRA8	0.398314	0.171934	0.414414	0.189389	PGC	0.662775	1.66395	2.80868e-53
C12orf45	Oogonia_STRA8	0.554268	0.282155	0.765766	0.303136	PGC	0.661559	1.19357	4.9606e-61
TEX12	Oogonia_meiotic	0.636866	0.0669162	0.463158	0.11716	Oocyte	1.36558	2.14422	0
SYCE3	Oogonia_meiotic	0.883871	0.160741	0.357218	0.224488	Oogonia_STRA8	1.32044	1.49393	0
SYCP2	Oogonia_meiotic	0.683871	0.102201	0.442105	0.153477	Oocyte	1.28171	1.8742	0
SYCP3	Oogonia_meiotic	0.917972	0.185423	0.444679	0.25	Oogonia_STRA8	1.27258	1.38629	0
SPDYA	Oogonia_meiotic	0.521659	0.0452642	0.060795	0.0872603	lowQC	1.27225	2.43886	0
C14orf39	Oogonia_meiotic	0.508756	0.0417001	0.0906217	0.0828729	Oogonia_STRA8	1.26703	2.49045	0
PAGE1	Oogonia_meiotic	0.610138	0.0788559	0.347368	0.125691	Oocyte	1.26539	2.07393	0
HORMAD1	Oogonia_meiotic	0.5447	0.0605008	0.219178	0.103185	Oogonia_STRA8	1.23714	2.27123	0
SMC1B	Oogonia_meiotic	0.850691	0.181413	0.651212	0.240413	Oogonia_STRA8	1.21257	1.4254	0
SYCP1	Oogonia_meiotic	0.505069	0.0542636	0.105263	0.0940039	Oocyte	1.1942	2.36442	9.44795e-311
LY6K	Oogonia_meiotic	0.524424	0.0723514	0.171171	0.112203	PGC	1.14715	2.18744	3.87938e-284
MEIOB	Oogonia_meiotic	0.524424	0.0741335	0.279279	0.113828	PGC	1.13961	2.17306	5.08414e-280
SPATA22	Oogonia_meiotic	0.592627	0.10924	0.477477	0.151852	PGC	1.11701	1.88485	3.31372e-276
FAM216A	Oogonia_meiotic	0.610138	0.11815	0.416228	0.161521	Oogonia_STRA8	1.11236	1.82312	2.27086e-277
RBM44	Oogonia_meiotic	0.517051	0.0799252	0.306306	0.11846	PGC	1.10296	2.13318	5.73899e-260
CENPU	Oogonia_meiotic	0.721659	0.168493	0.55216	0.217257	Oogonia_STRA8	1.10174	1.52667	6.79318e-308
ESCO2	Oogonia_meiotic	0.537327	0.0897265	0.410526	0.129184	Oocyte	1.09965	2.04652	1.43085e-259
MEIOC	Oogonia_meiotic	0.41106	0.0396507	0.131718	0.0723919	Oogonia_STRA8	1.0793	2.62566	1.20369e-255
ZCWPW1	Oogonia_meiotic	0.813825	0.220173	0.526316	0.272506	Oocyte	1.05805	1.3001	0
CENPK	Oogonia_meiotic	0.568664	0.119398	0.315789	0.159002	Oocyte	1.04568	1.83884	4.95646e-236
KNL1	Oogonia_meiotic	0.625806	0.146752	0.522523	0.188983	PGC	1.04266	1.6661	2.63979e-246
IQCB1	Oogonia_meiotic	0.665438	0.166177	0.284211	0.210188	Oocyte	1.03792	1.55975	2.10065e-255
TEX11	Oogonia_meiotic	0.43871	0.0618373	0.251844	0.0950601	Oogonia_STRA8	1.03239	2.35325	1.49526e-224
FAM9A	Oogonia_meiotic	0.380645	0.0376014	0.252252	0.0678421	PGC	1.02415	2.69057	4.75037e-231
TEX30	Oogonia_meiotic	0.78341	0.22347	0.583772	0.272831	Oogonia_STRA8	1.01757	1.2989	4.45201e-296
INCA1	Oogonia_meiotic	0.35023	0.0263744	0.0631579	0.0549236	Oocyte	1.0163	2.90181	2.56586e-237
CENPH	Oogonia_meiotic	0.534562	0.116814	0.5353	0.15364	Oogonia_STRA8	1.00131	1.87314	9.26822e-210
STK31	Oogonia_meiotic	0.44977	0.0768066	0.568421	0.109685	Oocyte	0.994056	2.21014	1.27439e-203
C8orf88	Oogonia_meiotic	0.517972	0.112715	0.231237	0.14844	Mesothelial	0.988071	1.90757	8.12386e-202
FAM9C	Oogonia_meiotic	0.313364	0.0166622	0.0736842	0.0428177	Oocyte	0.987349	3.1508	2.91384e-238
DLGAP5	Oogonia_meiotic	0.523502	0.118239	0.505263	0.153965	Oocyte	0.979489	1.87103	3.21326e-198
CCNB3	Oogonia_meiotic	0.380645	0.0474918	0.207587	0.0768606	Oogonia_STRA8	0.976645	2.56576	6.08806e-204
RBM46	Oogonia_meiotic	0.562212	0.138733	0.846847	0.176064	PGC	0.976509	1.73691	1.3506e-201
TOP2A	Oogonia_meiotic	0.764977	0.232825	0.674394	0.279737	Oogonia_STRA8	0.974509	1.27391	1.71845e-265
CLGN	Oogonia_meiotic	0.374194	0.0460661	0.273684	0.0749919	Oocyte	0.969302	2.59038	1.69944e-201
HELLS	Oogonia_meiotic	0.659908	0.188987	0.81982	0.2305	PGC	0.968416	1.4675	1.65e-220
CLSPN	Oogonia_meiotic	0.443318	0.0852713	0.363541	0.116835	Oogonia_STRA8	0.951802	2.147	7.93504e-183
FAM3B	Oogonia_meiotic	0.3447	0.036443	0.108108	0.0636172	PGC	0.949606	2.75487	3.47117e-199
DDX4	Oogonia_meiotic	0.558525	0.146752	0.702703	0.183052	PGC	0.948369	1.69799	6.47245e-188
DPEP3	Oogonia_meiotic	0.44977	0.0946271	0.36036	0.125934	PGC	0.93192	2.07199	6.06281e-173
RAD51AP2	Oogonia_meiotic	0.579724	0.166622	0.279279	0.203039	PGC	0.924287	1.59436	1.65962e-180
C18orf63	Oogonia_meiotic	0.291244	0.0189789	0.036036	0.0429802	PGC	0.91655	3.14702	1.60175e-204
UBE2T	Oogonia_meiotic	0.37788	0.0649559	0.342342	0.0925414	PGC	0.899392	2.3801	5.78074e-164
NCAPG	Oogonia_meiotic	0.468203	0.118507	0.431579	0.149334	Oocyte	0.890321	1.90157	1.57421e-153
SCML1	Oogonia_meiotic	0.483871	0.127773	0.249624	0.159165	Supporting	0.889265	1.83782	1.43212e-153
SHCBP1L	Oogonia_meiotic	0.270968	0.0153257	0.0421053	0.0378616	Oocyte	0.887099	3.27382	5.29692e-199
ZNF280C	Oogonia_meiotic	0.472811	0.122694	0.378378	0.153559	PGC	0.885893	1.87367	1.18244e-151
CNTD1	Oogonia_meiotic	0.279263	0.019959	0.045045	0.0428177	PGC	0.879902	3.1508	2.11291e-188
SLC25A31	Oogonia_meiotic	0.376037	0.071995	0.421053	0.0987975	Oocyte	0.870406	2.31468	5.21954e-150
AAMDC	Oogonia_meiotic	0.554839	0.175889	0.666667	0.209295	PGC	0.867774	1.56401	2.70003e-151
PSMD10	Oogonia_meiotic	0.493088	0.146039	0.473684	0.176633	Oocyte	0.854856	1.73368	5.72333e-139
TERB2	Oogonia_meiotic	0.284793	0.0274436	0.225225	0.05013	PGC	0.852423	2.99314	2.11819e-168
GLIPR1L2	Oogonia_meiotic	0.281106	0.0258398	0.0948367	0.0483425	Oogonia_STRA8	0.851595	3.02944	7.64449e-170
YEATS4	Oogonia_meiotic	0.419355	0.104963	0.387387	0.132678	PGC	0.847026	2.01983	8.32837e-135
BRDT	Oogonia_meiotic	0.340092	0.058095	0.663158	0.0829542	Oocyte	0.846648	2.48947	1.76402e-145
SYCE1	Oogonia_meiotic	0.345622	0.0637976	0.504505	0.0886415	PGC	0.837496	2.42315	1.00194e-139
STAG3	Oogonia_meiotic	0.348387	0.0658469	0.28451	0.090754	Oogonia_STRA8	0.835991	2.3996	2.01546e-138
RFC4	Oogonia_meiotic	0.38894	0.0915085	0.273684	0.117728	Oocyte	0.832089	2.13938	2.03721e-130
ANKRD31	Oogonia_meiotic	0.300461	0.0398289	0.198198	0.0628047	PGC	0.831593	2.76773	7.26612e-150
HERC5	Oogonia_meiotic	0.715207	0.277733	0.657534	0.316298	Oogonia_STRA8	0.823253	1.15107	2.96634e-174
TIPIN	Oogonia_meiotic	0.402765	0.10327	0.540541	0.129672	PGC	0.822748	2.04275	4.80373e-125
FAM228A	Oogonia_meiotic	0.36682	0.0810835	0.736842	0.106272	Oocyte	0.822319	2.24175	9.51195e-129
TEX15	Oogonia_meiotic	0.294009	0.0392943	0.115789	0.0617485	Oocyte	0.818723	2.78469	1.73872e-145
ASZ1	Oogonia_meiotic	0.253456	0.0188898	0.0947368	0.0395678	Oocyte	0.818598	3.22974	1.49423e-166
FKBP6	Oogonia_meiotic	0.300461	0.0433039	0.557895	0.0659734	Oocyte	0.816804	2.7185	4.42304e-142
MAD2L1	Oogonia_meiotic	0.462673	0.143812	0.498419	0.171921	Oogonia_STRA8	0.814638	1.76072	2.01326e-120
HSF2BP	Oogonia_meiotic	0.306912	0.0486501	0.305263	0.071417	Oocyte	0.810009	2.63922	2.03487e-136
SAP30	Oogonia_meiotic	0.473733	0.155128	0.293994	0.183214	Oogonia_STRA8	0.803972	1.6971	2.07196e-116
CPEB1	Oogonia_meiotic	0.363134	0.0871425	0.652632	0.111472	Oocyte	0.796708	2.19398	1.09273e-117
NUF2	Oogonia_meiotic	0.337327	0.0708367	0.284211	0.0943289	Oocyte	0.796419	2.36097	5.67819e-122
CCDC73	Oogonia_meiotic	0.247926	0.0206718	0.315789	0.0407052	Oocyte	0.793711	3.2014	7.93832e-155
KHDC1	Oogonia_meiotic	0.336406	0.0711931	0.181243	0.0945726	Oogonia_STRA8	0.793374	2.35839	9.24084e-121
CIAPIN1	Oogonia_meiotic	0.456221	0.149158	0.410526	0.176227	Oocyte	0.791992	1.73598	7.03998e-111
SLC4A1AP	Oogonia_meiotic	0.431336	0.133476	0.347368	0.159734	Oocyte	0.791178	1.83425	2.14637e-110
HSPB11	Oogonia_meiotic	0.56129	0.21545	0.468468	0.245938	PGC	0.787309	1.40268	8.6595e-119
CCNB1IP1	Oogonia_meiotic	0.292166	0.0463334	0.126316	0.0680045	Oocyte	0.785395	2.68818	6.02919e-129
MLF1	Oogonia_meiotic	0.473733	0.1668	0.368421	0.193858	Oocyte	0.777221	1.64063	1.45546e-105
EAF2	Oogonia_meiotic	0.270046	0.0371558	0.101064	0.0576861	Macrophages	0.770371	2.85274	7.13832e-130
UPF3B	Oogonia_meiotic	0.669124	0.283168	0.72973	0.317192	PGC	0.768321	1.14825	1.55428e-135
ALG13	Oogonia_meiotic	0.488479	0.181591	0.536842	0.208645	Oocyte	0.765507	1.56712	8.02849e-102
ECT2	Oogonia_meiotic	0.319816	0.0695001	0.157895	0.0915665	Oocyte	0.76458	2.39069	3.97372e-111
SGO2	Oogonia_meiotic	0.308756	0.0628174	0.206533	0.0844979	Oogonia_STRA8	0.762944	2.47103	4.58152e-113
HAGH	Oogonia_meiotic	0.420276	0.139357	0.526316	0.164121	Oocyte	0.759503	1.80715	1.09096e-97
DMXL2	Oogonia_meiotic	0.404608	0.12911	0.396396	0.153396	PGC	0.758532	1.87473	8.39643e-98
SYNGR4	Oogonia_meiotic	0.231336	0.019068	0.0653319	0.0377803	Oogonia_STRA8	0.757851	3.27597	2.13467e-144
NKAP	Oogonia_meiotic	0.599078	0.252339	0.621053	0.282905	Oocyte	0.756422	1.26264	2.18499e-113
PHF8	Oogonia_meiotic	0.380645	0.113962	0.702703	0.137472	PGC	0.755329	1.98434	5.06861e-98
SFR1	Oogonia_meiotic	0.348387	0.0937361	0.342342	0.116185	PGC	0.749929	2.15258	2.04237e-99
KDM1A	Oogonia_meiotic	0.645161	0.281119	0.720721	0.313211	PGC	0.748954	1.16088	4.45817e-121
PPP2R3C	Oogonia_meiotic	0.364977	0.106121	0.410526	0.128941	Oocyte	0.74762	2.0484	2.37176e-96
GTSF1	Oogonia_meiotic	0.319816	0.0762719	0.631579	0.0977413	Oocyte	0.743709	2.32543	9.12729e-102
VRK1	Oogonia_meiotic	0.395392	0.130268	0.452632	0.15364	Oocyte	0.740625	1.87314	4.3937e-91
TIMM17B	Oogonia_meiotic	0.570507	0.245478	0.846847	0.274131	PGC	0.738322	1.29415	3.79821e-101
CCDC122	Oogonia_meiotic	0.23871	0.0267308	0.0495258	0.0454176	Oogonia_STRA8	0.738056	3.09186	3.53055e-128
DAZL	Oogonia_meiotic	0.346544	0.0985476	0.756757	0.120409	PGC	0.733584	2.11686	8.05222e-93
CDC42SE2	Oogonia_meiotic	0.425806	0.155752	0.702703	0.179558	PGC	0.731219	1.71726	1.50274e-86
ZCCHC17	Oogonia_meiotic	0.742857	0.340105	0.594595	0.375609	PGC	0.72741	0.979206	2.8383e-144
KIF21A	Oogonia_meiotic	0.335484	0.0940034	0.221554	0.115291	Supporting	0.724745	2.1603	8.49963e-91
SPO11	Oogonia_meiotic	0.193548	0.00810835	0.0140296	0.0244556	lowQC	0.718238	3.71089	1.47158e-152
SPRYD7	Oogonia_meiotic	0.380645	0.130357	0.459459	0.152421	PGC	0.716035	1.88111	2.51107e-82
KPNA7	Oocyte	0.810526	0.0187505	0.0300078	0.0248619	lowQC	2.99442	3.69442	1.22443e-105
ACE2	Oocyte	0.642105	0.0162122	0.037234	0.0210432	Macrophages	2.47928	3.86118	3.2751e-77
LMOD3	Oocyte	0.621053	0.0140015	0.0214341	0.018687	lowQC	2.47174	3.97993	1.04892e-76
ZAR1	Oocyte	0.768421	0.0383198	0.0797872	0.0439552	Macrophages	2.401	3.12459	2.20474e-77
LDHAL6A	Oocyte	0.915789	0.0670597	0.12766	0.0736107	Macrophages	2.38926	2.60897	2.6716e-86
CCDC146	Oocyte	0.884211	0.0651765	0.12234	0.0714982	Macrophages	2.33262	2.63808	2.41231e-81
FIGLA	Oocyte	0.789474	0.0481454	0.132719	0.0538674	Oogonia_meiotic	2.30623	2.92123	1.59163e-74
AK5	Oocyte	0.642105	0.0234995	0.0476673	0.0282743	Mesothelial	2.28962	3.5658	6.95806e-69
ATG7	Oocyte	0.789474	0.0530582	0.111702	0.0587423	Macrophages	2.23784	2.8346	1.07875e-71
PADI6	Oocyte	0.715789	0.0406943	0.0957447	0.0459051	Macrophages	2.20548	3.08118	3.17775e-67
CABYR	Oocyte	0.863158	0.0769672	0.225225	0.0830354	PGC	2.14796	2.48849	2.62152e-72
CSF1R	Oocyte	0.6	0.0238271	0.260638	0.0282743	Macrophages	2.13948	3.5658	9.46698e-62
UPB1	Oocyte	0.673684	0.0373373	0.117051	0.0422489	Oogonia_meiotic	2.13166	3.16418	7.78128e-63
B3GAT2	Oocyte	0.642105	0.0329157	0.0682028	0.0376178	Oogonia_meiotic	2.10628	3.28028	4.9477e-61
OXT	Oocyte	0.557895	0.0191599	0.0258065	0.0233182	Oogonia_meiotic	2.09686	3.75852	1.40875e-59
MCTP1	Oocyte	0.557895	0.0199787	0.0625	0.0241306	Endothelial	2.07775	3.72427	9.49295e-59
RASL10A	Oocyte	0.536842	0.0213707	0.0797872	0.0253494	Macrophages	1.9729	3.675	4.37014e-54
VWF	Oocyte	0.642105	0.0423319	0.478125	0.0469613	Endothelial	1.96383	3.05843	5.32203e-55
PCCA	Oocyte	0.894737	0.106771	0.168922	0.112853	Supporting	1.95202	2.18167	1.17508e-66
MT1X	Oocyte	0.873684	0.102104	0.340625	0.10806	Endothelial	1.94401	2.22507	1.06594e-64
ARHGAP45	Oocyte	0.515789	0.0193237	0.276596	0.0231557	Macrophages	1.94221	3.76552	8.92581e-53
ASTL	Oocyte	0.568421	0.028658	0.0531915	0.0328242	Macrophages	1.94206	3.41659	6.15495e-53
F2	Oocyte	0.421053	0.00769672	0.0151988	0.0108872	lowQC	1.90323	4.52016	2.08434e-52
TGM7	Oocyte	0.452632	0.0138377	0.035023	0.0172246	Oogonia_meiotic	1.83833	4.06142	9.23098e-49
GDF9	Oocyte	0.663158	0.0595267	0.087218	0.0641859	Supporting	1.82101	2.74597	1.13991e-49
PPP1R3A	Oocyte	0.410526	0.00892492	0.0319149	0.0120247	Macrophages	1.81485	4.42079	1.34514e-48
NPM2	Oocyte	0.4	0.00892492	0.025	0.0119435	Endothelial	1.77103	4.42757	7.06227e-47
BAIAP2L1	Oocyte	0.557895	0.0383198	0.108535	0.0423302	Oogonia_STRA8	1.76421	3.16225	1.97937e-45
NINJ2	Oocyte	0.715789	0.0819618	0.243243	0.0868541	PGC	1.74905	2.44353	1.92812e-48
GINS2	Oocyte	0.778947	0.102186	0.252252	0.10741	PGC	1.73791	2.2311	1.22183e-50
MAL2	Oocyte	0.494737	0.0267747	0.0488479	0.0303867	Oogonia_meiotic	1.72849	3.49375	1.03616e-43
STK32C	Oocyte	0.547368	0.0393024	0.0977444	0.0432239	Supporting	1.71948	3.14136	1.63355e-43
NTNG2	Oocyte	0.431579	0.0159666	0.0425532	0.0191745	Macrophages	1.70654	3.95417	2.50046e-43
TMEM255B	Oocyte	0.547368	0.0417588	0.24375	0.0456614	Endothelial	1.68945	3.0865	2.56427e-42
DBH	Oocyte	0.389474	0.0103169	0.0212766	0.0132434	Macrophages	1.68418	4.32425	2.97939e-43
NLRP7	Oocyte	0.852632	0.134283	0.666667	0.139828	PGC	1.67742	1.96734	2.09436e-52
FAM228A	Oocyte	0.736842	0.101367	0.36682	0.106272	Oogonia_meiotic	1.65182	2.24175	2.48318e-45
BRDT	Oocyte	0.663158	0.078441	0.340092	0.0829542	Oogonia_meiotic	1.65091	2.48947	7.72771e-43
NLRP14	Oocyte	0.357895	0.00769672	0.0159574	0.0103997	Macrophages	1.63414	4.56597	5.11622e-42
MAP3K7CL	Oocyte	0.357895	0.00802424	0.0135417	0.0107247	Mesenchymal	1.62313	4.5352	1.60023e-41
WEE2	Oocyte	0.326316	0.00458528	0.00701481	0.00706857	lowQC	1.61595	4.9521	1.41944e-42
EPB41L3	Oocyte	0.547368	0.0515844	0.11275	0.0554111	Oogonia_STRA8	1.58352	2.89298	5.38481e-38
NLRP2	Oocyte	0.8	0.136085	0.72973	0.141209	PGC	1.56601	1.95751	7.80179e-45
PNLDC1	Oocyte	0.442105	0.0282486	0.0525346	0.031443	Oogonia_meiotic	1.5295	3.45958	1.03271e-35
FKBP6	Oocyte	0.557895	0.0621469	0.300461	0.0659734	Oogonia_meiotic	1.51664	2.7185	1.99592e-35
KCNK9	Oocyte	0.326316	0.00712356	0.00989583	0.00958726	Mesenchymal	1.51649	4.64732	7.70538e-38
TDRD1	Oocyte	0.494737	0.0440514	0.137327	0.0475301	Oogonia_meiotic	1.50716	3.04639	1.19084e-34
C6orf52	Oocyte	0.789474	0.14329	0.306306	0.148278	PGC	1.50684	1.90867	5.31009e-42
OSTF1	Oocyte	0.705263	0.114878	0.393617	0.119435	Macrophages	1.49868	2.12499	4.23847e-38
HABP4	Oocyte	0.547368	0.0611643	0.423423	0.0649171	PGC	1.49686	2.73464	1.4863e-34
SLC27A5	Oocyte	0.568421	0.0690248	0.513514	0.0728794	PGC	1.48867	2.61895	1.74535e-34
ESRP1	Oocyte	0.357895	0.0131827	0.306306	0.0158434	PGC	1.48348	4.14501	2.91162e-35
CCDC178	Oocyte	0.357895	0.0133464	0.0630631	0.0160058	PGC	1.47982	4.1348	4.13332e-35
SH2D4A	Oocyte	0.547368	0.0639483	0.315416	0.0676796	Mesothelial	1.47405	2.69297	1.10662e-33
GTSF1	Oocyte	0.631579	0.0935888	0.319816	0.0977413	Oogonia_meiotic	1.46869	2.32543	7.84553e-35
OOEP	Oocyte	0.431579	0.0303775	0.207207	0.0334742	PGC	1.46607	3.39698	2.72702e-33
TMEM54	Oocyte	0.494737	0.0490461	0.0990516	0.0524862	Oogonia_STRA8	1.45809	2.94721	9.23809e-33
LGALS4	Oocyte	0.347368	0.0126095	0.025	0.0151934	Endothelial	1.4544	4.1869	2.433e-34
CATSPERD	Oocyte	0.273684	0.00294768	0.00552995	0.00503737	Oogonia_meiotic	1.44803	5.29087	1.55047e-37
CPEB1	Oocyte	0.652632	0.107263	0.648649	0.111472	PGC	1.43186	2.19398	6.02951e-34
CNRIP1	Oocyte	0.652632	0.108818	0.265625	0.113016	Endothelial	1.42288	2.18023	1.29613e-33
LHX8	Oocyte	0.315789	0.00892492	0.0294931	0.0112935	Oogonia_meiotic	1.41585	4.48353	9.34705e-34
MVP	Oocyte	0.652632	0.110538	0.279279	0.114722	PGC	1.41311	2.16524	2.90963e-33
G6PD	Oocyte	0.631579	0.102841	0.387387	0.106922	PGC	1.41199	2.23565	1.03551e-32
GMPR	Oocyte	0.673684	0.120118	0.828829	0.124391	PGC	1.40418	2.08433	1.74215e-33
CHRNE	Oocyte	0.336842	0.0130189	0.18617	0.0155184	Macrophages	1.40319	4.16573	1.62922e-32
SOHLH1	Oocyte	0.305263	0.008188	0.0211982	0.010481	Oogonia_meiotic	1.39145	4.55819	3.82417e-33
CBR4	Oocyte	0.610526	0.10104	0.306306	0.104972	PGC	1.37616	2.25406	7.3237e-31
GDAP1	Oocyte	0.473684	0.0534676	0.0875576	0.0567111	Oogonia_meiotic	1.35937	2.86979	7.32108e-29
EPSTI1	Oocyte	0.631579	0.112339	0.367021	0.116347	Macrophages	1.35864	2.15118	1.19231e-30
IGF2BP3	Oocyte	0.736842	0.155736	0.468468	0.160221	PGC	1.34931	1.8312	1.59096e-33
ARHGAP18	Oocyte	0.642105	0.118398	0.51875	0.122441	Endothelial	1.3485	2.10013	1.62359e-30
CAMSAP3	Oocyte	0.336842	0.0158028	0.108108	0.0182808	PGC	1.34801	4.0019	3.61113e-30
UCHL1	Oocyte	0.736842	0.157128	0.441441	0.161602	PGC	1.34298	1.82262	2.72702e-33
CHRNA3	Oocyte	0.326316	0.0139196	0.0540541	0.0163308	PGC	1.34269	4.1147	2.95987e-30
PRMT7	Oocyte	0.6	0.103988	0.459459	0.107816	PGC	1.3364	2.22733	3.68991e-29
CLDN10	Oocyte	0.326316	0.014329	0.0990991	0.0167371	PGC	1.33467	4.09013	6.33109e-30
SMYD2	Oocyte	0.421053	0.0414313	0.117117	0.0443614	PGC	1.31174	3.11539	3.21657e-27
DNAJC5G	Oocyte	0.273684	0.00638664	0.0239631	0.00844979	Oogonia_meiotic	1.30646	4.77361	8.53724e-31
PDZK1	Oocyte	0.326316	0.0159666	0.0295739	0.018362	Supporting	1.30444	3.99747	1.18567e-28
MAEL	Oocyte	0.494737	0.0699255	0.270046	0.0732044	Oogonia_meiotic	1.29349	2.6145	2.34741e-26
GLMN	Oocyte	0.536842	0.0876934	0.243243	0.0911602	PGC	1.28581	2.39514	2.34816e-26
WFDC2	Oocyte	0.421053	0.0451159	0.189189	0.0480175	PGC	1.2784	3.03619	6.34586e-26
SLCO4A1	Oocyte	0.294737	0.01089	0.0273834	0.0130809	Mesothelial	1.27816	4.3366	1.24817e-28
GYG1	Oocyte	0.810526	0.202653	0.30137	0.207345	Oogonia_STRA8	1.27526	1.57337	5.14618e-34
CMC4	Oocyte	0.694737	0.157128	0.337327	0.161277	Oogonia_meiotic	1.26764	1.82463	6.00325e-29
SLC3A1	Oocyte	0.347368	0.0240727	0.0400421	0.0265681	Oogonia_STRA8	1.26027	3.62804	2.67298e-26
TESC	Oocyte	0.610526	0.123311	0.49711	0.127072	Erythroid	1.25952	2.063	1.84781e-26
STK31	Oocyte	0.568421	0.106116	0.44977	0.109685	Oogonia_meiotic	1.25629	2.21014	1.21838e-25
JAG1	Oocyte	0.6	0.121346	0.35	0.125041	Endothelial	1.24747	2.07912	8.01473e-26
ARG2	Oocyte	0.347368	0.025219	0.0586466	0.0277056	Supporting	1.24571	3.58612	1.0249e-25
GLIPR1	Oocyte	0.326316	0.0196512	0.462766	0.0220182	Macrophages	1.24518	3.81589	3.26407e-26
MYH15	Oocyte	0.284211	0.0103988	0.0540541	0.0125122	PGC	1.24514	4.38105	1.25443e-27
FOXR1	Oocyte	0.347368	0.0256284	0.0948367	0.0281118	Oogonia_STRA8	1.24065	3.57157	1.59237e-25
PSD3	Oocyte	0.557895	0.104806	0.223958	0.108304	Mesenchymal	1.2401	2.22282	6.91488e-25
KYNU	Oocyte	0.294737	0.0131008	0.0851064	0.0152746	Macrophages	1.23246	4.18156	1.1325e-26
RBM46	Oocyte	0.705263	0.171948	0.846847	0.176064	PGC	1.22498	1.73691	1.08299e-27
ADCY3	Oocyte	0.4	0.0440514	0.0966146	0.0467988	Mesenchymal	1.22476	3.0619	4.94598e-24
MFSD12	Oocyte	0.484211	0.0809793	0.175456	0.0840916	Mesothelial	1.19883	2.47585	9.52162e-23
DND1	Oocyte	0.442105	0.0638664	0.522523	0.0667858	PGC	1.19645	2.70626	1.15191e-22
RGS5	Supporting	0.901754	0.159798	0.291075	0.280062	Mesothelial	1.1477	1.27275	0
SOST	Supporting	0.590977	0.0804809	0.338742	0.163227	Mesothelial	1.07121	1.81261	0
KITLG	Supporting	0.657143	0.109377	0.350913	0.198164	Mesothelial	1.06369	1.61866	0
CRYM	Supporting	0.530326	0.0662271	0.242105	0.141453	Oocyte	1.03721	1.95579	0
WNT6	Supporting	0.457644	0.0353922	0.108519	0.103835	Mesothelial	1.03654	2.26495	0
PLA2G1B	Supporting	0.650627	0.118588	0.303245	0.204826	Mesothelial	1.03163	1.58559	0
TMEM176B	Supporting	0.58396	0.0933773	0.217039	0.172896	Mesothelial	1.02489	1.75507	0
AMHR2	Supporting	0.597995	0.102686	0.46146	0.18297	Mesothelial	1.01565	1.69843	0
CDH3	Supporting	0.55589	0.0875594	0.369369	0.163471	PGC	1.00678	1.81112	0
ETNK2	Supporting	0.711278	0.153786	0.684584	0.24415	Mesothelial	1.00288	1.40997	0
GREB1	Supporting	0.595489	0.107534	0.494929	0.186627	Mesothelial	0.999614	1.67865	0
TCEA3	Supporting	0.618546	0.117716	0.458418	0.198895	Mesothelial	0.998939	1.61498	0
GATM	Supporting	0.450627	0.0440221	0.133874	0.109929	Mesothelial	0.99495	2.20793	0
EMX2	Supporting	0.750877	0.172404	0.77789	0.266168	Mesothelial	0.993881	1.32363	0
NR1H4	Supporting	0.394987	0.0209444	0.0404624	0.081573	Erythroid	0.98994	2.50626	0
CCDC69	Supporting	0.625063	0.127703	0.581136	0.20832	Mesothelial	0.980524	1.56868	0
SCG5	Supporting	0.631579	0.136818	0.680527	0.217013	Mesothelial	0.964924	1.5278	0
ITGA6	Supporting	0.828571	0.217105	0.90991	0.316217	PGC	0.953956	1.15133	0
HMGN5	Supporting	0.615038	0.134684	0.259635	0.212545	Mesothelial	0.952449	1.5486	0
SLC25A29	Supporting	0.677694	0.161641	0.586207	0.245288	Mesothelial	0.95238	1.40532	0
DSEL	Supporting	0.569424	0.114419	0.268763	0.18817	Mesothelial	0.95117	1.67041	0
GRB14	Supporting	0.506767	0.0847474	0.125	0.153152	Endothelial	0.950858	1.87632	0
TMEM176A	Supporting	0.466165	0.066615	0.154255	0.131378	Macrophages	0.946165	2.02968	0
PRKAR2B	Supporting	0.689223	0.172016	0.462475	0.25585	Mesothelial	0.939524	1.36316	0
LHX2	Supporting	0.598496	0.134103	0.755578	0.209376	Mesothelial	0.935823	1.56362	0
GSTA3	Supporting	0.426566	0.0507127	0.071875	0.111635	Endothelial	0.935257	2.19252	0
SYT10	Supporting	0.569925	0.122176	0.768763	0.194751	Mesothelial	0.932415	1.63603	0
CDH2	Supporting	0.619048	0.147775	0.72973	0.224163	PGC	0.925712	1.49538	0
HS3ST3A1	Supporting	0.41604	0.0489673	0.28499	0.108466	Mesothelial	0.924157	2.22132	0
PRSS35	Supporting	0.673684	0.173858	0.336714	0.254875	Mesothelial	0.920915	1.36698	0
PCDH17	Supporting	0.683208	0.180549	0.559375	0.262025	Endothelial	0.915032	1.33932	0
ADGRG1	Supporting	0.369925	0.0300591	0.106491	0.0851479	Mesothelial	0.91126	2.46337	0
TOX3	Supporting	0.489724	0.091341	0.489858	0.155915	Mesothelial	0.910126	1.85845	0
RRAD	Supporting	0.417544	0.0542034	0.111702	0.113097	Macrophages	0.91004	2.17951	0
EHD4	Supporting	0.451128	0.0725298	0.41875	0.133897	Endothelial	0.907077	2.01069	0
PLSCR4	Supporting	0.623559	0.159217	0.556795	0.234482	Mesothelial	0.904396	1.45038	0
CHCHD10	Supporting	0.784962	0.225928	0.530426	0.316542	Mesothelial	0.902942	1.1503	0
SERINC5	Supporting	0.53584	0.119461	0.4875	0.186952	Endothelial	0.898552	1.67691	0
PLAAT3	Supporting	0.762406	0.222244	0.427992	0.309799	Mesothelial	0.893413	1.17183	0
DENND4C	Supporting	0.531328	0.122855	0.333333	0.189064	PGC	0.885017	1.66567	0
DPYSL3	Supporting	0.679699	0.19616	0.540541	0.274537	PGC	0.878627	1.29267	0
ISYNA1	Supporting	0.877193	0.270144	0.584178	0.368541	Mesothelial	0.875617	0.998204	0
ITGA2	Supporting	0.482707	0.102783	0.4125	0.164365	Endothelial	0.871608	1.80567	4.47326e-305
PLAT	Supporting	0.495739	0.110637	0.397566	0.173058	Mesothelial	0.86959	1.75413	5.82814e-304
BMPR1B	Supporting	0.400501	0.0589547	0.396396	0.114316	PGC	0.868603	2.16879	8.20019e-313
CD200	Supporting	0.665163	0.194803	0.536511	0.271043	Mesothelial	0.868355	1.30548	0
GAP43	Supporting	0.409023	0.063706	0.27789	0.119678	Mesothelial	0.868334	2.12295	7.30705e-310
SIPA1L2	Supporting	0.429574	0.0758266	0.432432	0.133165	PGC	0.866091	2.01616	8.41613e-303
JUP	Supporting	0.469173	0.0990982	0.459459	0.159084	PGC	0.862493	1.83833	6.65992e-296
GUCY1A1	Supporting	0.680702	0.20702	0.752535	0.283799	Mesothelial	0.857336	1.25949	0
HOPX	Supporting	0.392982	0.0603122	0.212766	0.114235	Macrophages	0.852576	2.1695	5.88778e-298
ME1	Supporting	0.377444	0.052652	0.155172	0.105297	Mesothelial	0.849613	2.25097	7.56845e-301
SEC14L1	Supporting	0.566917	0.159895	0.53125	0.225869	Endothelial	0.843459	1.4878	2.36261e-294
KIAA1522	Supporting	0.419048	0.0788325	0.331643	0.133978	Mesothelial	0.842319	2.01008	1.97517e-280
DSP	Supporting	0.423559	0.0827111	0.666667	0.137959	PGC	0.838985	1.9808	2.57803e-276
FDXR	Supporting	0.507268	0.130709	0.474645	0.191745	Mesothelial	0.837798	1.65159	2.10464e-275
IRX3	Supporting	0.444612	0.0957045	0.540568	0.152259	Mesothelial	0.836836	1.88217	7.44954e-272
CLU	Supporting	0.82005	0.272278	0.688641	0.361066	Mesothelial	0.835381	1.01869	0
TFPI	Supporting	0.515288	0.140308	0.3375	0.201089	Endothelial	0.826527	1.60401	1.85941e-266
ITPR2	Supporting	0.475188	0.118103	0.556795	0.175983	Mesothelial	0.825576	1.73737	4.71602e-261
TLE4	Supporting	0.435088	0.0952196	0.357895	0.150309	Oocyte	0.824519	1.89506	8.32146e-261
SCD	Supporting	0.37594	0.0607001	0.189655	0.111797	Mesothelial	0.82371	2.19107	2.08745e-273
ZMYM3	Supporting	0.466667	0.115582	0.362069	0.172489	Mesothelial	0.820129	1.75742	9.78503e-256
MAP2	Supporting	0.491228	0.129836	0.473631	0.188414	Mesothelial	0.819915	1.66911	3.63259e-257
TSPO	Supporting	0.611529	0.194706	0.68357	0.262268	Mesothelial	0.818462	1.33839	6.51019e-289
ASAH1	Supporting	0.574436	0.177252	0.432432	0.241631	PGC	0.815895	1.42034	2.8595e-272
WT1	Supporting	0.593484	0.187918	0.721095	0.253656	Mesothelial	0.814126	1.37178	1.21362e-277
FYB2	Supporting	0.361404	0.0572093	0.366126	0.106516	Mesothelial	0.809348	2.23946	2.7851e-264
SOX6	Supporting	0.357393	0.0549792	0.332657	0.103997	Mesothelial	0.808921	2.26339	1.16009e-265
C4orf48	Supporting	0.621053	0.20479	0.513514	0.272262	PGC	0.807984	1.30099	4.97929e-284
BTC	Supporting	0.314286	0.0307379	0.121704	0.0766981	Mesothelial	0.807048	2.56788	3.95951e-292
IVNS1ABP	Supporting	0.660652	0.224862	0.490872	0.295499	Mesothelial	0.805394	1.21909	3.06263e-302
AP1S2	Supporting	0.631579	0.212935	0.532454	0.280793	Mesothelial	0.802192	1.27014	5.12713e-284
RGS4	Supporting	0.396992	0.0819354	0.30426	0.133003	Mesothelial	0.800886	2.01738	4.13348e-244
AXL	Supporting	0.417544	0.0946378	0.174442	0.146978	Mesothelial	0.80063	1.91748	3.23206e-240
SIMC1	Supporting	0.402506	0.0861049	0.141927	0.13739	Mesenchymal	0.798947	1.98493	4.24725e-241
TM7SF2	Supporting	0.373434	0.0690391	0.276876	0.118378	Mesothelial	0.796859	2.13387	9.67601e-247
PPP1R1A	Supporting	0.337845	0.0483855	0.178947	0.0953039	Oocyte	0.794166	2.35068	5.28381e-260
HOXD9	Supporting	0.647118	0.224668	0.728195	0.293143	Mesothelial	0.794076	1.2271	6.50137e-285
ENDOD1	Supporting	0.402506	0.088723	0.359026	0.139584	Mesothelial	0.792571	1.96909	4.515e-235
PODXL	Supporting	0.415539	0.0976438	0.559838	0.149171	Mesothelial	0.790629	1.90266	3.20294e-231
RAB11FIP2	Supporting	0.619048	0.213517	0.692698	0.279249	Mesothelial	0.789688	1.27565	2.45576e-267
ATP1A1	Supporting	0.783459	0.284204	0.648073	0.365128	Mesothelial	0.78934	1.00751	0
SAT1	Supporting	0.752882	0.274217	0.783784	0.351804	PGC	0.786522	1.04468	0
RAMP1	Supporting	0.507268	0.155338	0.510142	0.212382	Mesothelial	0.785945	1.54937	1.38236e-229
TNPO3	Supporting	0.498246	0.151459	0.351351	0.20767	PGC	0.783145	1.57181	7.92669e-226
ZBTB20	Supporting	0.534837	0.172986	0.422921	0.231638	Mesothelial	0.782242	1.46258	5.42307e-232
SCARB1	Supporting	0.325815	0.0451857	0.103125	0.0906727	Endothelial	0.782117	2.4005	3.9437e-254
OPN3	Supporting	0.439599	0.117134	0.501014	0.169402	Mesothelial	0.780499	1.77548	3.52719e-220
FLNB	Supporting	0.45213	0.125473	0.711712	0.178421	PGC	0.779297	1.72361	5.55947e-219
DPP7	Supporting	0.56792	0.192863	0.439148	0.253656	Mesothelial	0.779059	1.37178	1.40918e-238
BCAM	Supporting	0.474185	0.14089	0.590625	0.194914	Endothelial	0.775387	1.6352	1.41699e-216
GADD45G	Supporting	0.719298	0.267236	0.463489	0.34051	Mesothelial	0.774907	1.07731	7.11909e-314
DMD	Supporting	0.384962	0.0856201	0.431579	0.13414	Oocyte	0.773339	2.00887	9.31757e-221
OSBPL1A	Supporting	0.564411	0.194124	0.432432	0.254144	PGC	0.773162	1.36986	1.50588e-232
KAZN	Supporting	0.491228	0.152429	0.309331	0.207345	Mesothelial	0.772885	1.57337	3.4193e-216
PSEN2	Supporting	0.344862	0.0611849	0.1643	0.107166	Mesothelial	0.770207	2.23338	2.88271e-231
RDH10	Supporting	0.46015	0.136236	0.281771	0.188739	Mesenchymal	0.76725	1.66739	8.0563e-209
FBXO21	Supporting	0.645614	0.239601	0.658215	0.305411	Mesothelial	0.765761	1.1861	4.77433e-260
HUNK	Supporting	0.322306	0.0490643	0.252252	0.0933539	PGC	0.764302	2.37136	4.91404e-237
MSLN	Mesothelial	0.633874	0.0653595	0.209023	0.110903	Supporting	1.39395	2.1991	0
SYT10	Mesothelial	0.768763	0.144762	0.569925	0.194751	Supporting	1.25772	1.63603	0
NSG1	Mesothelial	0.568966	0.072337	0.178947	0.112122	Oocyte	1.24499	2.18817	2.54634e-305
CYSTM1	Mesothelial	0.638945	0.104575	0.25	0.147384	Macrophages	1.2234	1.91472	1.41312e-306
LHX2	Mesothelial	0.755578	0.161809	0.598496	0.209376	Supporting	1.18144	1.56362	0
MBNL3	Mesothelial	0.833671	0.191839	0.483709	0.243256	Supporting	1.17851	1.41364	0
PLLP	Mesothelial	0.434077	0.0344462	0.324324	0.0664608	PGC	1.17684	2.71114	3.23512e-275
KRT19	Mesothelial	0.802231	0.186893	0.391479	0.236188	Supporting	1.15772	1.44313	0
DOCK11	Mesothelial	0.648073	0.138845	0.702703	0.179639	PGC	1.11261	1.7168	3.20696e-257
AQP1	Mesothelial	0.380325	0.0272037	0.396875	0.0554924	Endothelial	1.09971	2.89151	1.71658e-246
WIF1	Mesothelial	0.395538	0.0356827	0.073183	0.0645109	Supporting	1.08414	2.74092	2.91747e-233
PODXL	Mesothelial	0.559838	0.113408	0.425	0.149171	Endothelial	1.06518	1.90266	8.76653e-219
MYRF	Mesothelial	0.470588	0.0729553	0.27218	0.10481	Supporting	1.06146	2.25561	2.5893e-212
INHBB	Mesothelial	0.362069	0.0298534	0.189189	0.0564673	PGC	1.04062	2.87409	1.62354e-219
SCG5	Mesothelial	0.680527	0.176647	0.666667	0.217013	PGC	1.03971	1.5278	2.45173e-234
RSPO1	Mesothelial	0.383367	0.0389507	0.14787	0.0665421	Supporting	1.03889	2.70992	2.34729e-212
CLDN1	Mesothelial	0.540568	0.112436	0.309774	0.146734	Supporting	1.03742	1.91914	2.93723e-204
MEGF6	Mesothelial	0.391481	0.0435435	0.121875	0.071417	Endothelial	1.0332	2.63922	1.42289e-207
EMX2	Mesothelial	0.77789	0.221604	0.750877	0.266168	Supporting	1.02964	1.32363	1.53815e-268
CADM1	Mesothelial	0.525355	0.10908	0.396396	0.142428	PGC	1.02388	1.94892	6.3892e-197
IRX3	Mesothelial	0.540568	0.118442	0.444612	0.152259	Supporting	1.01744	1.88217	1.42168e-195
COL26A1	Mesothelial	0.452333	0.078873	0.314286	0.108791	Supporting	1.00342	2.21833	3.17936e-186
PTGDS	Mesothelial	0.978702	0.306571	0.719298	0.360416	Supporting	0.998762	1.0205	0
WT1	Mesothelial	0.721095	0.212948	0.593484	0.253656	Supporting	0.989181	1.37178	1.26754e-226
CD9	Mesothelial	0.484787	0.0994524	0.702703	0.130322	PGC	0.987874	2.03775	4.3536e-179
TMEM155	Mesothelial	0.352941	0.0366543	0.147368	0.0619922	Oocyte	0.98144	2.78075	5.15531e-191
CXADR	Mesothelial	0.402637	0.060855	0.513514	0.0882353	PGC	0.977501	2.42775	1.21771e-178
CHL1	Mesothelial	0.317444	0.0226992	0.234234	0.0463113	PGC	0.975306	3.07237	3.4286e-201
LEF1	Mesothelial	0.493915	0.109875	0.309774	0.14064	Supporting	0.968839	1.96155	3.37648e-171
ITPR2	Mesothelial	0.556795	0.142819	0.475188	0.175983	Supporting	0.967358	1.73737	3.03861e-176
ETNK2	Mesothelial	0.684584	0.205794	0.711278	0.24415	Supporting	0.965244	1.40997	5.60491e-204
KISS1	Mesothelial	0.813387	0.267797	0.433584	0.311505	Supporting	0.948687	1.16634	1.54997e-251
ALDH1A2	Mesothelial	0.439148	0.0872637	0.318797	0.115453	Supporting	0.948072	2.15889	3.24741e-162
GUCY1A1	Mesothelial	0.752535	0.242978	0.680702	0.283799	Supporting	0.94781	1.25949	1.17704e-221
BCAM	Mesothelial	0.578093	0.161544	0.590625	0.194914	Endothelial	0.945297	1.6352	2.27271e-170
NPNT	Mesothelial	0.400609	0.0703056	0.25614	0.0967663	Supporting	0.935604	2.33546	9.24266e-160
DPY19L1	Mesothelial	0.545639	0.149974	0.390977	0.18167	Supporting	0.93062	1.70556	1.08733e-159
PDLIM5	Mesothelial	0.557809	0.158099	0.522523	0.19012	PGC	0.926018	1.6601	1.97555e-159
KDR	Mesothelial	0.311359	0.0294118	0.546875	0.0519987	Endothelial	0.920544	2.95654	6.57368e-174
TSPO	Mesothelial	0.68357	0.225579	0.611529	0.262268	Supporting	0.914881	1.33839	5.76358e-183
ISOC1	Mesothelial	0.617647	0.194577	0.368421	0.228469	Oocyte	0.911865	1.47635	1.90628e-164
CCDC69	Mesothelial	0.581136	0.175852	0.625063	0.20832	Supporting	0.911617	1.56868	2.87133e-157
TOX3	Mesothelial	0.489858	0.126833	0.489724	0.155915	Supporting	0.910374	1.85845	1.28114e-146
SERPING1	Mesothelial	0.711968	0.245451	0.546875	0.282824	Endothelial	0.899165	1.26293	6.15335e-186
PTPRF	Mesothelial	0.488844	0.131779	0.378378	0.160383	PGC	0.894676	1.83019	3.36477e-140
HOXD9	Mesothelial	0.728195	0.255255	0.647118	0.293143	Supporting	0.893565	1.2271	1.56688e-189
OPN3	Mesothelial	0.501014	0.140523	0.439599	0.169402	Supporting	0.889541	1.77548	7.28066e-139
RAB11FIP2	Mesothelial	0.692698	0.243243	0.619048	0.279249	Supporting	0.88364	1.27565	3.07081e-173
PDZK1IP1	Mesothelial	0.23428	0.00529942	0.0115607	0.0236432	Erythroid	0.877304	3.74468	1.29981e-201
IGFBP2	Mesothelial	0.761663	0.277513	0.91875	0.316298	Endothelial	0.876727	1.15107	4.90323e-196
HPCAL1	Mesothelial	0.691684	0.246511	0.527318	0.282174	Supporting	0.875139	1.26523	1.50519e-169
CST6	Mesothelial	0.264706	0.0173114	0.135135	0.0371303	PGC	0.871762	3.29332	8.56707e-171
IQCJ-SCHIP1	Mesothelial	0.358012	0.0642996	0.221554	0.0878291	Supporting	0.870816	2.43236	3.10352e-137
COL12A1	Mesothelial	0.425963	0.104928	0.215625	0.130647	Mesenchymal	0.866946	2.03526	1.28076e-128
HOXD4	Mesothelial	0.768763	0.285285	0.633083	0.324017	Supporting	0.866364	1.12696	6.62278e-195
ESR1	Mesothelial	0.358012	0.0673909	0.189975	0.0906727	Supporting	0.859408	2.4005	3.02973e-132
PTN	Mesothelial	0.770791	0.292528	0.565885	0.330842	Mesenchymal	0.852584	1.10612	3.66587e-190
SH2D4A	Mesothelial	0.315416	0.0461049	0.547368	0.0676796	Oocyte	0.849406	2.69297	2.20504e-137
SLC39A4	Mesothelial	0.705882	0.267091	0.828829	0.302242	PGC	0.844606	1.19653	4.67842e-162
CLIC5	Mesothelial	0.321501	0.0514043	0.217544	0.0730419	Supporting	0.841279	2.61672	5.31802e-132
ARAP2	Mesothelial	0.346856	0.066331	0.287234	0.088804	Macrophages	0.83985	2.42132	8.7365e-126
PTGFRN	Mesothelial	0.544625	0.185568	0.43609	0.214332	Supporting	0.838847	1.54023	1.47691e-123
PDZRN3	Mesothelial	0.419878	0.111199	0.286717	0.135928	Supporting	0.837922	1.99563	2.81441e-117
SLC9A3R1	Mesothelial	0.342799	0.0651828	0.441441	0.0874228	PGC	0.835401	2.437	1.20561e-124
CACNB3	Mesothelial	0.504057	0.164282	0.427068	0.191501	Supporting	0.833135	1.65286	2.81441e-117
GREB1	Mesothelial	0.494929	0.159777	0.595489	0.186627	Supporting	0.83081	1.67865	9.37991e-116
LIMCH1	Mesothelial	0.327586	0.0588235	0.51875	0.0803542	Endothelial	0.825947	2.52131	9.8886e-124
SLC25A29	Mesothelial	0.586207	0.215598	0.677694	0.245288	Supporting	0.823811	1.40532	3.67918e-124
LTBP1	Mesothelial	0.824544	0.328476	0.701754	0.368216	Supporting	0.82379	0.999086	1.16803e-204
CPXM1	Mesothelial	0.597363	0.222311	0.55188	0.252356	Supporting	0.822517	1.37691	1.09253e-125
FYB2	Mesothelial	0.366126	0.0839074	0.361404	0.106516	Supporting	0.819924	2.23946	1.77428e-114
CDON	Mesothelial	0.407708	0.110228	0.183594	0.134059	Mesenchymal	0.819279	2.00947	1.49886e-110
MAP3K1	Mesothelial	0.579108	0.216216	0.529825	0.245288	Supporting	0.813834	1.40532	2.9561e-119
TGFB2	Mesothelial	0.36714	0.0875287	0.235088	0.109929	Supporting	0.810618	2.20793	1.33741e-110
RAB11FIP1	Mesothelial	0.380325	0.0961844	0.319149	0.118947	Macrophages	0.80974	2.12908	7.93103e-109
PLSCR4	Mesothelial	0.556795	0.206412	0.623559	0.234482	Supporting	0.807563	1.45038	1.44604e-113
WNT2B	Mesothelial	0.270791	0.0323264	0.108108	0.05143	PGC	0.803582	2.96753	2.41053e-131
MT3	Mesothelial	0.421907	0.126391	0.323308	0.150065	Supporting	0.800225	1.89669	1.02109e-102
GLB1L3	Mesothelial	0.43002	0.13222	0.589474	0.156077	Oocyte	0.798721	1.8574	5.20795e-102
PRR5L	Mesothelial	0.266734	0.0312666	0.105263	0.05013	Oocyte	0.798372	2.99314	1.52789e-130
KLHL23	Mesothelial	0.479716	0.165253	0.37995	0.190445	Supporting	0.795557	1.65839	7.67152e-102
CYTL1	Mesothelial	0.290061	0.0447801	0.0825521	0.0644296	Mesenchymal	0.7954	2.74218	2.27611e-120
TMEM14A	Mesothelial	0.547667	0.208709	0.422556	0.235863	Supporting	0.791108	1.4445	2.19137e-106
MAP2	Mesothelial	0.473631	0.163575	0.491228	0.188414	Supporting	0.790544	1.66911	1.00284e-99
RAMP1	Mesothelial	0.510142	0.186451	0.507268	0.212382	Supporting	0.790398	1.54937	4.41634e-102
EMP2	Mesothelial	0.576065	0.225755	0.478125	0.253819	Endothelial	0.789863	1.37114	4.85032e-110
RICTOR	Mesothelial	0.510142	0.189013	0.387387	0.214738	PGC	0.784769	1.53833	4.59995e-100
PTGER4	Mesothelial	0.288032	0.0462816	0.132979	0.0656484	Macrophages	0.78444	2.72344	4.37928e-116
CRIM1	Mesothelial	0.400609	0.11853	0.317293	0.141128	Supporting	0.784428	1.95809	1.32191e-97
PLXNB1	Mesothelial	0.280933	0.0422187	0.152882	0.0613422	Supporting	0.784165	2.79129	2.66456e-118
FDXR	Mesothelial	0.474645	0.167108	0.507268	0.191745	Supporting	0.783918	1.65159	2.21901e-97
AMHR2	Mesothelial	0.46146	0.158718	0.597995	0.18297	Supporting	0.783759	1.69843	8.07866e-97
FBXO21	Mesothelial	0.658215	0.274686	0.645614	0.305411	Supporting	0.780707	1.1861	1.06135e-123
PADI4	Mesothelial	0.205882	0.00733086	0.0315789	0.0232369	Oocyte	0.774532	3.76201	1.00388e-158
GCA	Mesothelial	0.410751	0.129217	0.378378	0.151771	PGC	0.774421	1.88538	1.81956e-93
EPCAM	Mesothelial	0.317444	0.0674792	0.441441	0.0875041	PGC	0.773316	2.43607	1.20487e-103
ITPR3	Mesothelial	0.282961	0.0466349	0.2875	0.0655671	Endothelial	0.77098	2.72468	1.03066e-111
PPP3CA	Mesothelial	0.490872	0.183625	0.389975	0.208239	Supporting	0.770213	1.56907	1.98856e-93
PCMTD2	Mesothelial	0.432049	0.146352	0.414414	0.16924	PGC	0.767509	1.77644	1.43594e-90
FGFR2	Mesothelial	0.336714	0.0824943	0.273684	0.10286	Supporting	0.765818	2.27439	4.60154e-97
C7	Mesenchymal	0.755208	0.0487718	0.09375	0.269175	Endothelial	0.991132	1.3124	0
OGN	Mesenchymal	0.826823	0.0821918	0.132948	0.314511	Erythroid	0.956416	1.15674	0
OLFML3	Mesenchymal	0.691406	0.0521965	0.171171	0.251625	PGC	0.954013	1.37982	0
DLK1	Mesenchymal	0.700521	0.0569202	0.15	0.257719	Endothelial	0.949827	1.35589	0
EMILIN1	Mesenchymal	0.632031	0.0415683	0.14375	0.225788	Endothelial	0.940563	1.48816	0
PMP22	Mesenchymal	0.653385	0.0588096	0.153125	0.244313	Endothelial	0.92082	1.40931	0
TCF21	Mesenchymal	0.679948	0.0673122	0.247465	0.25845	Mesothelial	0.920006	1.35305	0
MMP2	Mesenchymal	0.71224	0.0841993	0.477477	0.280143	PGC	0.906293	1.27246	0
LTBP4	Mesenchymal	0.759635	0.0987246	0.268763	0.304924	Mesothelial	0.902214	1.18769	0
HTRA3	Mesenchymal	0.521094	0.025744	0.105263	0.180289	Oocyte	0.892734	1.71319	0
FXYD1	Mesenchymal	0.646615	0.0726264	0.230223	0.251706	Mesothelial	0.892	1.37949	0
CXCL12	Mesenchymal	0.69401	0.0886868	0.2	0.277543	Endothelial	0.889568	1.28178	0
HIC1	Mesenchymal	0.507552	0.0347189	0.29375	0.182239	Endothelial	0.864075	1.70244	0
COL1A2	Mesenchymal	0.927083	0.16769	0.279919	0.404615	Mesothelial	0.838843	0.90482	0
MFAP4	Mesenchymal	0.583594	0.0820737	0.290061	0.238544	Mesothelial	0.836407	1.4332	0
NR2F2	Mesenchymal	0.876823	0.1671	0.575	0.388528	Endothelial	0.82894	0.945391	0
ITM2A	Mesenchymal	0.570573	0.0814832	0.421875	0.234075	Endothelial	0.828536	1.45211	0
RARRES2	Mesenchymal	0.776042	0.149976	0.4375	0.345304	Endothelial	0.825189	1.06333	0
GASK1B	Mesenchymal	0.64401	0.112069	0.234085	0.278031	Supporting	0.824349	1.28002	0
COL5A2	Mesenchymal	0.625781	0.109117	0.317444	0.270312	Mesothelial	0.818634	1.30818	0
CLDN11	Mesenchymal	0.42474	0.0201937	0.0630631	0.146409	PGC	0.816074	1.92135	0
THY1	Mesenchymal	0.539323	0.0787671	0.8125	0.222457	Endothelial	0.810614	1.50302	0
EDNRA	Mesenchymal	0.591667	0.10274	0.244422	0.255281	Mesothelial	0.807856	1.36539	0
CLEC11A	Mesenchymal	0.478906	0.0538498	0.153153	0.186464	PGC	0.804331	1.67952	0
LUM	Mesenchymal	0.419792	0.0320028	0.0635838	0.15299	Erythroid	0.78811	1.87738	0
COL6A1	Mesenchymal	0.502083	0.0759329	0.207207	0.208889	PGC	0.78624	1.56595	0
NR2F1	Mesenchymal	0.484635	0.0686112	0.153125	0.198408	Endothelial	0.783865	1.61743	0
SNAI2	Mesenchymal	0.433854	0.0446386	0.275	0.166071	Endothelial	0.778916	1.79534	0
AKAP12	Mesenchymal	0.642708	0.148677	0.63964	0.302811	PGC	0.767809	1.19465	0
NUPR1	Mesenchymal	0.510156	0.0931743	0.326572	0.223269	Mesothelial	0.764916	1.49938	0
NID1	Mesenchymal	0.410156	0.0408597	0.378125	0.156077	Endothelial	0.761826	1.8574	0
EVA1B	Mesenchymal	0.683333	0.1671	0.675	0.328161	Endothelial	0.761406	1.11425	0
COL6A2	Mesenchymal	0.922656	0.220359	0.4125	0.43947	Endothelial	0.758594	0.822185	0
MEST	Mesenchymal	0.740885	0.187766	0.390476	0.360335	Supporting	0.756238	1.02072	0
DHRS2	Mesenchymal	0.363021	0.0168871	0.034375	0.124878	Endothelial	0.755235	2.08042	0
SERPINF1	Mesenchymal	0.435937	0.0599906	0.294737	0.177283	Oocyte	0.754175	1.73001	0
COL14A1	Mesenchymal	0.67474	0.176193	0.360902	0.331735	Supporting	0.744519	1.10342	0
IGFBP4	Mesenchymal	0.895312	0.236301	0.840625	0.441908	Endothelial	0.731161	0.816654	0
PDLIM3	Mesenchymal	0.558333	0.140293	0.373225	0.270718	Mesothelial	0.729561	1.30668	0
TGFBR3	Mesenchymal	0.509635	0.117619	0.333671	0.239925	Mesothelial	0.727468	1.42743	0
SSPN	Mesenchymal	0.417708	0.0663675	0.164411	0.175983	Supporting	0.725713	1.73737	0
SPON2	Mesenchymal	0.407292	0.0601086	0.207207	0.168427	PGC	0.725489	1.78125	0
POSTN	Mesenchymal	0.484896	0.110179	0.17341	0.227088	Erythroid	0.718818	1.48242	0
GSN	Mesenchymal	0.392969	0.0555031	0.207207	0.16079	PGC	0.718212	1.82766	0
KANK2	Mesenchymal	0.445312	0.0888049	0.288288	0.200032	PGC	0.71663	1.60928	0
ALCAM	Mesenchymal	0.588802	0.164384	0.464503	0.296799	Mesothelial	0.715218	1.2147	0
CYGB	Mesenchymal	0.32474	0.0138167	0.036036	0.110822	PGC	0.714371	2.19983	0
CYP1B1	Mesenchymal	0.459896	0.102031	0.301217	0.213682	Mesothelial	0.709741	1.54327	0
MMP23B	Mesenchymal	0.36875	0.0452291	0.115619	0.146165	Mesothelial	0.709113	1.92302	0
FXYD6	Mesenchymal	0.445312	0.0986065	0.218546	0.206776	Supporting	0.701865	1.57612	0
PDGFRB	Mesenchymal	0.394271	0.0675484	0.180952	0.169483	Supporting	0.699831	1.775	0
PDE5A	Mesenchymal	0.34974	0.039915	0.0720081	0.136578	Mesothelial	0.696283	1.99086	0
EMP3	Mesenchymal	0.747656	0.234412	0.62234	0.39454	Macrophages	0.695346	0.930034	0
ANGPTL2	Mesenchymal	0.34401	0.037435	0.179513	0.133084	Mesothelial	0.693791	2.01677	0
TBX2	Mesenchymal	0.31276	0.0165328	0.0389884	0.108954	Oogonia_STRA8	0.693338	2.21683	0
CREB3L1	Mesenchymal	0.302604	0.0121634	0.040625	0.102779	Endothelial	0.688478	2.27518	0
FBLIM1	Mesenchymal	0.38125	0.0667218	0.20625	0.164852	Endothelial	0.687282	1.80271	0
COL6A3	Mesenchymal	0.327344	0.0299953	0.0561404	0.122766	Supporting	0.686596	2.09748	0
CAVIN1	Mesenchymal	0.63776	0.206188	0.765625	0.340835	Endothelial	0.686457	1.07636	0
S100A6	Mesenchymal	0.478385	0.130846	0.452128	0.239275	Macrophages	0.684158	1.43014	0
FSTL1	Mesenchymal	0.640625	0.21351	0.684685	0.346766	PGC	0.678489	1.0591	0
DHRS3	Mesenchymal	0.388021	0.0772319	0.29375	0.174196	Endothelial	0.678096	1.74758	0
PCOLCE	Mesenchymal	0.355208	0.0546764	0.191684	0.14844	Mesothelial	0.677586	1.90757	0
IGFBP3	Mesenchymal	0.378385	0.0709731	0.20625	0.166883	Endothelial	0.677484	1.79046	0
MFAP2	Mesenchymal	0.682552	0.230397	0.548682	0.371466	Mesothelial	0.67593	0.990299	0
CDH11	Mesenchymal	0.392708	0.0820737	0.34787	0.178989	Mesothelial	0.675627	1.72043	0
FBLN1	Mesenchymal	0.617448	0.207133	0.576577	0.335148	PGC	0.674984	1.09318	0
CCDC80	Mesenchymal	0.540365	0.173831	0.498986	0.288187	Mesothelial	0.672293	1.24415	0
FN1	Mesenchymal	0.454167	0.126358	0.38125	0.228632	Endothelial	0.670188	1.47564	0
NDRG2	Mesenchymal	0.408854	0.0982522	0.20625	0.195158	Endothelial	0.668046	1.63395	0
MYC	Mesenchymal	0.409115	0.0984884	0.253125	0.195401	Endothelial	0.667961	1.6327	0
RGS2	Mesenchymal	0.458594	0.131672	0.579787	0.233669	Macrophages	0.666726	1.45385	0
FKBP7	Mesenchymal	0.454688	0.129428	0.308316	0.230907	Mesothelial	0.666454	1.46574	0
LMO4	Mesenchymal	0.517188	0.168044	0.657658	0.276974	PGC	0.663981	1.28383	0
PLPP3	Mesenchymal	0.560156	0.191781	0.575051	0.306711	Mesothelial	0.66202	1.18185	0
COLEC11	Mesenchymal	0.353906	0.0636514	0.157895	0.154209	Supporting	0.66161	1.86945	0
ZEB2	Mesenchymal	0.379948	0.0827822	0.271277	0.175496	Macrophages	0.661163	1.74014	0
TGFBI	Mesenchymal	0.32526	0.0436939	0.143617	0.13154	Macrophages	0.659771	2.02844	0
BGN	Mesenchymal	0.291927	0.019367	0.071875	0.104404	Endothelial	0.659607	2.25949	0
AR	Mesenchymal	0.381771	0.0857345	0.198496	0.178096	Supporting	0.658721	1.72544	9.3581e-320
LRRC17	Mesenchymal	0.652083	0.234766	0.729209	0.364966	Mesothelial	0.657268	1.00795	0
ALDH1A1	Mesenchymal	0.348698	0.0641238	0.189474	0.152909	Oocyte	0.654825	1.87791	0
SERPINE2	Mesenchymal	0.797396	0.278224	0.562907	0.440201	Supporting	0.654281	0.820523	0
PDLIM2	Mesenchymal	0.49349	0.163085	0.374239	0.266168	Mesothelial	0.653196	1.32363	5.49661e-306
LMNA	Mesenchymal	0.58125	0.212211	0.421875	0.327348	Endothelial	0.6491	1.11673	0
DPT	Mesenchymal	0.265885	0.00661313	0.03125	0.0875041	Endothelial	0.647716	2.43607	0
TPM2	Mesenchymal	0.713802	0.26299	0.693694	0.40364	PGC	0.647584	0.907232	0
EPB41L2	Mesenchymal	0.54349	0.195087	0.774775	0.303786	PGC	0.64753	1.19143	6.66036e-318
LITAF	Mesenchymal	0.470052	0.153873	0.414414	0.252519	PGC	0.646919	1.37627	7.24209e-289
GBP1	Mesenchymal	0.324479	0.0510156	0.45	0.136334	Endothelial	0.646572	1.99265	0
ADAMTS1	Mesenchymal	0.530469	0.189537	0.474645	0.295905	Mesothelial	0.645961	1.21772	2.91312e-308
PPIC	Mesenchymal	0.477865	0.161431	0.547368	0.260156	Oocyte	0.643432	1.34647	2.02507e-284
HSPB6	Mesenchymal	0.288021	0.0263344	0.178947	0.107979	Oocyte	0.641083	2.22582	0
TAGLN	Mesenchymal	0.369531	0.0914029	0.211028	0.178177	Supporting	0.637434	1.72498	3.50367e-282
RASSF2	Mesenchymal	0.340625	0.0706188	0.1875	0.154859	Endothelial	0.635348	1.86524	6.44811e-296
MAFF	Mesenchymal	0.400521	0.115966	0.375	0.204745	Endothelial	0.635222	1.58599	1.19144e-267
MAP1B	Mesenchymal	0.580208	0.223666	0.536842	0.334904	Oocyte	0.634696	1.09391	1.99059e-319
GPX7	Mesenchymal	0.500521	0.182097	0.3375	0.281443	Endothelial	0.634573	1.26783	6.11333e-276
TAGLN2	Mesenchymal	0.416146	0.128248	0.809375	0.21807	Endothelial	0.633766	1.52294	1.14574e-262
RCN1	Mesenchymal	0.629167	0.245749	0.488722	0.365372	Supporting	0.63347	1.00684	0
ALAS2	Erythroid	0.855491	0.00255459	0.018018	0.0145434	PGC	3.61926	4.23062	1.95069e-278
HBZ	Erythroid	0.901734	0.0114545	0.036036	0.0239682	PGC	3.3644	3.73103	2.67112e-248
HBM	Erythroid	0.791908	0.00321384	0.00900901	0.0142996	PGC	3.36364	4.24752	8.11316e-246
SNCA	Erythroid	0.768786	0.00379069	0.018018	0.0145434	PGC	3.25244	4.23062	4.14264e-232
AHSP	Erythroid	0.768786	0.00543881	0.0990991	0.0161683	PGC	3.17101	4.1247	9.23725e-222
CD52	Erythroid	0.982659	0.0372476	0.657658	0.0505362	PGC	2.9333	2.98506	2.45627e-222
HEMGN	Erythroid	0.445087	0.00107128	0.00531915	0.00731232	Macrophages	2.18902	4.9182	1.71812e-133
ALOX15	Erythroid	0.433526	0.00618047	0.0446247	0.0121872	Mesothelial	1.91071	4.40737	7.23629e-101
UCP2	Erythroid	0.560694	0.0262876	0.468085	0.0337992	Macrophages	1.89925	3.38732	6.32488e-96
KLF1	Erythroid	0.364162	0.00123609	0.018018	0.00633734	PGC	1.84313	5.0613	4.08589e-104
TRIM58	Erythroid	0.445087	0.00988875	0.0631579	0.0160058	Oocyte	1.84034	4.1348	2.72199e-93
SPTA1	Erythroid	0.364162	0.00346106	0.0147465	0.00853104	Oogonia_meiotic	1.73488	4.76404	1.7573e-90
SLC25A37	Erythroid	0.786127	0.10103	0.181454	0.11066	Supporting	1.7305	2.2013	3.84835e-94
BPGM	Erythroid	0.66474	0.0772971	0.378947	0.0855541	Oocyte	1.63433	2.45861	2.46621e-78
NFE2	Erythroid	0.34104	0.00568603	0.162162	0.0103997	PGC	1.55718	4.56597	6.45848e-75
SLFN14	Erythroid	0.248555	0.000247219	0.0020284	0.00373741	Mesothelial	1.38926	5.58936	1.20352e-75
CA1	Erythroid	0.260116	0.00148331	0.0478723	0.00511862	Macrophages	1.37208	5.27487	1.63532e-68
GPX1	Erythroid	0.531792	0.0695509	0.378947	0.0760481	Oocyte	1.3701	2.57639	1.76518e-54
FECH	Erythroid	0.49711	0.0575196	0.126126	0.0636984	PGC	1.36884	2.7536	4.51766e-54
TSPO2	Erythroid	0.236994	8.24063e-05	0.000501253	0.00341241	Supporting	1.34621	5.68034	2.61006e-74
SLC4A1	Erythroid	0.231214	0.000576844	0.00105374	0.00381865	Oogonia_STRA8	1.28737	5.56786	3.02597e-66
PHOSPHO1	Erythroid	0.236994	0.0013185	0.018018	0.00463113	PGC	1.27383	5.37495	2.61026e-62
EPB42	Erythroid	0.289017	0.00972394	0.0953347	0.0136497	Mesothelial	1.24105	4.29404	3.58706e-51
OAZ1	Erythroid	0.83237	0.236012	0.643617	0.244394	Macrophages	1.17279	1.40897	1.29877e-57
GPX4	Erythroid	0.491329	0.0871034	0.333333	0.0927852	PGC	1.16812	2.37747	1.28707e-39
R3HDM4	Erythroid	0.462428	0.0772147	0.164894	0.0826292	Macrophages	1.15301	2.49339	1.81182e-38
AC034228.3	Erythroid	0.231214	0.0039555	0.0159574	0.00714982	Macrophages	1.14235	4.94067	4.32638e-49
IFIT5	Erythroid	0.751445	0.22019	0.471875	0.227657	Endothelial	1.11208	1.47992	3.70948e-46
RBM38	Erythroid	0.410405	0.0623815	0.315315	0.0672733	PGC	1.10768	2.69899	1.09447e-35
MPP1	Erythroid	0.416185	0.065513	0.191489	0.070442	Macrophages	1.10412	2.65297	2.26468e-35
CREG1	Erythroid	0.641618	0.182035	0.468468	0.188495	PGC	1.07066	1.66868	6.0969e-37
EPB41	Erythroid	0.549133	0.142398	0.567568	0.148115	PGC	1.04872	1.90977	1.80845e-32
SLC25A39	Erythroid	0.606936	0.172476	0.673684	0.178583	Oocyte	1.04557	1.7227	6.33653e-34
TESC	Erythroid	0.49711	0.121796	0.610526	0.127072	Oocyte	1.02554	2.063	4.522e-30
HBQ1	Erythroid	0.254335	0.0145859	0.0947368	0.0179558	Oocyte	1.02239	4.01984	3.49167e-36
BLVRB	Erythroid	0.543353	0.149155	0.340426	0.154696	Macrophages	1.01405	1.86629	4.522e-30
ADIPOR1	Erythroid	0.456647	0.103914	0.234234	0.108872	PGC	1.01265	2.21758	5.41537e-29
CD44	Erythroid	0.404624	0.0875155	0.585106	0.0919727	Macrophages	0.96554	2.38626	3.98126e-26
GAREM2	Erythroid	0.16763	0.000988875	0.00900901	0.00333117	PGC	0.956234	5.70443	6.18352e-43
BNIP3L	Erythroid	0.583815	0.197198	0.297297	0.202632	PGC	0.93198	1.59636	6.5187e-26
ISCA1	Erythroid	0.872832	0.338278	0.747748	0.345791	PGC	0.926878	1.06192	1.03062e-44
FKBP8	Erythroid	0.757225	0.314215	0.576577	0.320442	PGC	0.861763	1.13805	7.35377e-30
ERMAP	Erythroid	0.196532	0.00988875	0.0295739	0.0125122	Supporting	0.861016	4.38105	5.10907e-29
POC1B	Erythroid	0.317919	0.0676555	0.138298	0.0711732	Macrophages	0.840145	2.64264	8.10416e-20
RMND5A	Erythroid	0.612717	0.249526	0.610526	0.254631	Oocyte	0.838159	1.36794	4.2379e-21
ANK1	Erythroid	0.150289	0.00181294	0.0159574	0.0038999	Macrophages	0.833624	5.5468	8.81722e-34
JOSD2	Erythroid	0.416185	0.130944	0.279279	0.134953	PGC	0.833548	2.00283	9.51898e-18
FAM210B	Erythroid	0.589595	0.238896	0.90991	0.243825	PGC	0.832098	1.4113	5.3359e-20
TSPAN8	Erythroid	0.144509	0.00164813	0.00811359	0.00365616	Mesothelial	0.810888	5.61134	8.42455e-33
MXI1	Erythroid	0.404624	0.14042	0.252252	0.144134	PGC	0.783762	1.93701	7.09852e-15
HIPK1	Erythroid	0.416185	0.151133	0.396396	0.154859	PGC	0.776286	1.86524	2.09526e-14
MYL4	Erythroid	0.202312	0.0195303	0.040625	0.0220994	Endothelial	0.771255	3.8122	1.33177e-21
GIPC2	Erythroid	0.289017	0.0664194	0.294737	0.0695483	Oocyte	0.770443	2.66573	2.21705e-16
HMBS	Erythroid	0.225434	0.0304903	0.225225	0.0332304	PGC	0.767441	3.40429	1.57756e-19
DCAF12	Erythroid	0.184971	0.0135146	0.0478723	0.0159246	Macrophages	0.76576	4.13989	7.35468e-23
STMP1	Erythroid	0.641618	0.2993	0.560852	0.304111	Mesothelial	0.763758	1.19036	8.54629e-18
BCL2L1	Erythroid	0.352601	0.115122	0.468468	0.11846	PGC	0.752163	2.13318	1.33976e-13
TMOD1	Erythroid	0.144509	0.00370828	0.018018	0.00568736	PGC	0.747039	5.16951	1.07753e-26
TUBA4A	Erythroid	0.271676	0.0611454	0.388298	0.0641046	Macrophages	0.74636	2.74724	1.46963e-15
GMPR	Erythroid	0.346821	0.12122	0.828829	0.124391	PGC	0.722888	2.08433	4.96787e-12
RUNDC3A	Erythroid	0.132948	0.00346106	0.0110276	0.00528112	Supporting	0.697128	5.24362	2.3683e-24
TFDP2	Erythroid	0.560694	0.289905	0.567568	0.293711	PGC	0.686938	1.22516	3.34362e-11
UROD	Erythroid	0.387283	0.167779	0.441441	0.170864	PGC	0.684285	1.76688	1.54864e-09
STRADB	Erythroid	0.300578	0.108776	0.336842	0.111472	Oocyte	0.659462	2.19398	1.71297e-09
CMAS	Erythroid	0.433526	0.215657	0.431579	0.21872	Oocyte	0.658944	1.51997	3.06519e-08
GLUL	Erythroid	0.456647	0.238813	0.483709	0.241875	Supporting	0.648135	1.41933	7.48049e-08
NUDT4	Erythroid	0.595376	0.334652	0.711712	0.338317	PGC	0.645252	1.08377	6.09552e-10
BACE2	Erythroid	0.32948	0.146848	0.396396	0.149415	PGC	0.62635	1.90103	3.02335e-07
TRAK2	Erythroid	0.369942	0.183024	0.422055	0.185652	Supporting	0.62294	1.68388	1.11632e-06
XPO7	Erythroid	0.33526	0.153688	0.432432	0.15624	PGC	0.622364	1.85636	5.47629e-07
RANBP10	Erythroid	0.202312	0.0446642	0.0837093	0.0468801	Supporting	0.619108	3.06016	2.82683e-11
ZER1	Erythroid	0.213873	0.0534817	0.0993915	0.0557361	Mesothelial	0.617478	2.88713	1.7822e-10
RHAG	Erythroid	0.115607	0.00346106	0.0125313	0.00503737	Supporting	0.611661	5.29087	4.65855e-20
MACO1	Erythroid	0.352601	0.181623	0.387387	0.184027	PGC	0.596839	1.69267	1.26563e-05
UBE2O	Erythroid	0.236994	0.0802637	0.279279	0.0824667	PGC	0.591386	2.49536	6.87255e-08
GLRX5	Erythroid	0.531792	0.332015	0.652632	0.334823	Oocyte	0.581862	1.09415	9.18395e-06
CPEB4	Erythroid	0.375723	0.211784	0.480702	0.214088	Supporting	0.579126	1.54137	0.000104181
TRIM10	Erythroid	0.0867052	8.24063e-05	0.000260417	0.00129997	Mesenchymal	0.576192	6.64542	4.42859e-25
TRIM59	Erythroid	0.184971	0.044417	0.135135	0.0463926	PGC	0.567975	3.07062	2.64485e-09
GLIPR2	Erythroid	0.265896	0.118171	0.308511	0.120247	Macrophages	0.563223	2.11821	1.58418e-05
ITSN1	Erythroid	0.271676	0.124681	0.306306	0.126747	PGC	0.561165	2.06556	2.76311e-05
FAXDC2	Erythroid	0.213873	0.0712814	0.168421	0.0732857	Supporting	0.558933	2.61339	3.7128e-07
PIP4K2A	Erythroid	0.219653	0.0791924	0.336842	0.0811667	Oocyte	0.551604	2.51125	1.60901e-06
USP15	Erythroid	0.317919	0.176432	0.441441	0.178421	PGC	0.547969	1.72361	0.000687381
NBN	Erythroid	0.283237	0.143304	0.378378	0.145271	PGC	0.546407	1.92915	0.000234724
ICAM4	Erythroid	0.16185	0.0330449	0.084375	0.0348554	Endothelial	0.543256	3.35655	1.74342e-09
TUBB1	Erythroid	0.0982659	0.00280181	0.036036	0.00414365	PGC	0.539104	5.48618	3.66692e-17
RAP1A	Erythroid	0.369942	0.232963	0.537234	0.234888	Macrophages	0.535916	1.44865	0.00480974
ACKR1	Erythroid	0.0982659	0.00304903	0.059375	0.00438739	Endothelial	0.533488	5.42902	1.11012e-16
GABARAPL2	Erythroid	0.716763	0.479275	0.842105	0.482613	Oocyte	0.522191	0.72854	4.71758e-08
RAP2A	Erythroid	0.242775	0.11471	0.221053	0.11651	Oocyte	0.521912	2.14978	0.000299317
TCP11L2	Erythroid	0.150289	0.0301607	0.0904255	0.0318492	Macrophages	0.518008	3.44674	6.98547e-09
NARF	Erythroid	0.231214	0.110342	0.305263	0.112041	Oocyte	0.506102	2.18889	0.000687381
PDCD10	Erythroid	0.387283	0.269881	0.630631	0.271531	PGC	0.504893	1.30368	0.0578937
SMAP1	Erythroid	0.375723	0.260981	0.547368	0.262593	Oocyte	0.502397	1.33715	0.067019
RIOK3	Erythroid	0.231214	0.112485	0.252252	0.114153	PGC	0.501783	2.17021	0.0010637
RNF11	Erythroid	0.271676	0.158962	0.258333	0.160546	Mesenchymal	0.496943	1.82917	0.0141468
GPCPD1	Erythroid	0.323699	0.217965	0.430075	0.219451	Supporting	0.490931	1.51663	0.0901704
TALDO1	Erythroid	0.520231	0.388875	0.576577	0.390721	PGC	0.488893	0.93976	0.0360228
PIM1	Erythroid	0.248555	0.139102	0.531532	0.14064	PGC	0.487553	1.96155	0.0114931
CD48	Macrophages	0.75	0.00132013	0.00208333	0.0127559	Mesenchymal	3.27132	4.36176	1.87555e-263
PTPRC	Macrophages	0.680851	0.00132013	0.00578035	0.0116997	Erythroid	3.02856	4.44819	8.6115e-234
SRGN	Macrophages	0.904255	0.0247525	0.609375	0.0381865	Endothelial	2.95264	3.26527	2.9141e-228
RAC2	Macrophages	0.611702	0.00338284	0.0736842	0.0126747	Oocyte	2.67201	4.36815	9.85679e-188
CD37	Macrophages	0.606383	0.00412541	0.018018	0.0133247	PGC	2.61845	4.31814	6.82536e-181
CORO1A	Macrophages	0.659574	0.010396	0.0630631	0.020312	PGC	2.57006	3.89654	3.04383e-172
ARHGDIB	Macrophages	0.728723	0.0193894	0.25625	0.0302242	Endothelial	2.54988	3.49911	1.14882e-171
LCP1	Macrophages	0.617021	0.0070132	0.171171	0.0163308	PGC	2.53886	4.1147	4.95959e-170
TYROBP	Macrophages	0.537234	0.00255776	0.0210526	0.0107247	Oocyte	2.43647	4.5352	2.91357e-165
LAPTM5	Macrophages	0.579787	0.00635314	0.14375	0.0151121	Endothelial	2.43062	4.19226	2.41287e-159
RGS1	Macrophages	0.510638	0.00214521	0.00368664	0.00991225	Oogonia_meiotic	2.35608	4.61398	1.92371e-158
ISG20	Macrophages	0.515957	0.00437294	0.0736842	0.0121872	Oocyte	2.27402	4.40737	6.12985e-146
CLEC2B	Macrophages	0.505319	0.0040429	0.121875	0.0116997	Endothelial	2.24776	4.44819	6.4092e-144
TNFRSF1B	Macrophages	0.654255	0.02467	0.15	0.0342866	Endothelial	2.2068	3.373	1.55601e-135
LSP1	Macrophages	0.638298	0.024835	0.0875	0.0342054	Endothelial	2.15449	3.37537	3.45229e-130
CD53	Macrophages	0.430851	0.000660066	0.0105263	0.00723107	Oocyte	2.12382	4.92937	1.00552e-142
CST7	Macrophages	0.414894	0.00049505	0.00625	0.00682483	Endothelial	2.06915	4.98719	7.7511e-139
CD3D	Macrophages	0.414894	0.000907591	0.00368664	0.00723107	Oogonia_meiotic	2.04516	4.92937	5.87638e-134
GPSM3	Macrophages	0.446809	0.00437294	0.028125	0.011131	Endothelial	2.00976	4.49802	1.36792e-121
ITGB2	Macrophages	0.425532	0.00247525	0.0540541	0.00893728	PGC	2.00746	4.71752	7.07111e-125
CLEC2D	Macrophages	0.398936	0.00049505	0.00105374	0.00658109	Oogonia_STRA8	2.00408	5.02356	6.70909e-133
CTSS	Macrophages	0.468085	0.00874587	0.0190476	0.0157621	Supporting	1.94262	4.15015	6.2505e-112
FCER1G	Macrophages	0.404255	0.00222772	0.021875	0.00836854	Endothelial	1.93366	4.78328	5.4819e-119
CD52	Macrophages	0.643617	0.0413366	0.982659	0.0505362	Erythroid	1.92124	2.98506	2.55789e-109
GMFG	Macrophages	0.712766	0.0575908	0.371875	0.0675983	Endothelial	1.92031	2.69417	5.52579e-113
CD3G	Macrophages	0.37234	0.000247525	0.000921659	0.0059311	Oogonia_meiotic	1.90919	5.12755	1.552e-126
TRAC	Macrophages	0.382979	0.00107261	0.003125	0.00690608	Endothelial	1.90545	4.97535	1.28985e-120
FYB1	Macrophages	0.388298	0.00181518	0.018018	0.00771856	PGC	1.88873	4.86413	2.89112e-116
CD27	Macrophages	0.356383	0	0	0.00544361	PGC	1.85794	5.21331	2.59547e-125
SAMSN1	Macrophages	0.382979	0.00206271	0.00900901	0.00788105	PGC	1.85488	4.84329	1.35374e-112
CXCR4	Macrophages	0.590426	0.0355611	0.14375	0.0440364	Endothelial	1.84374	3.12274	7.53812e-101
APBB1IP	Macrophages	0.404255	0.00486799	0.0221286	0.0109685	Oogonia_STRA8	1.8243	4.51273	6.82576e-105
STK17B	Macrophages	0.515957	0.0223597	0.0631579	0.0298993	Oocyte	1.81097	3.50992	1.94015e-97
GLIPR1	Macrophages	0.462766	0.0151815	0.326316	0.0220182	Oocyte	1.76586	3.81589	1.70701e-94
CD69	Macrophages	0.37234	0.00321782	0.08125	0.00885603	Endothelial	1.75993	4.72666	6.14658e-102
ADGRE5	Macrophages	0.43617	0.0116337	0.10625	0.0181183	Endothelial	1.74941	4.01083	3.64054e-94
GZMB	Macrophages	0.340426	0.00107261	0.00578035	0.00625609	Erythroid	1.72739	5.0742	2.7968e-105
CD84	Macrophages	0.340426	0.00140264	0.00578035	0.00658109	Erythroid	1.71015	5.02356	1.76436e-102
LTB	Macrophages	0.345745	0.00189769	0.025	0.00714982	Endothelial	1.70821	4.94067	1.04635e-100
ANXA1	Macrophages	0.478723	0.0213696	0.259375	0.0283555	Endothelial	1.70566	3.56293	1.9913e-88
PLAAT4	Macrophages	0.430851	0.0133663	0.059375	0.0197433	Endothelial	1.69107	3.92494	9.32248e-89
CYTIP	Macrophages	0.351064	0.00280528	0.0842105	0.0081248	Oocyte	1.68961	4.81283	5.82056e-97
BCL2A1	Macrophages	0.319149	0.00107261	0.00316122	0.0059311	Oogonia_STRA8	1.63645	5.12755	9.6264e-98
RHOF	Macrophages	0.37234	0.00709571	0.0842105	0.0126747	Oocyte	1.62644	4.36815	1.20804e-86
S100A4	Macrophages	0.468085	0.024835	0.0578125	0.0316055	Mesenchymal	1.61697	3.45443	1.14347e-80
CCL5	Macrophages	0.319149	0.00165017	0.018018	0.00649984	PGC	1.60723	5.03598	3.15726e-93
DOCK8	Macrophages	0.367021	0.00750825	0.0421496	0.0129997	Oogonia_STRA8	1.59391	4.34283	9.11637e-84
UCP2	Macrophages	0.468085	0.0270627	0.560694	0.0337992	Erythroid	1.58555	3.38732	6.58512e-78
LAT	Macrophages	0.345745	0.00544554	0.0212982	0.0106435	Mesothelial	1.57065	4.54281	1.06403e-83
LPXN	Macrophages	0.404255	0.014934	0.117117	0.0208807	PGC	1.56403	3.86893	4.05678e-78
CD74	Macrophages	0.414894	0.0169967	0.38125	0.0230744	Endothelial	1.56375	3.76903	1.37428e-77
CD86	Macrophages	0.287234	0.000247525	0.0010142	0.00463113	Mesothelial	1.54387	5.37495	2.18834e-95
FXYD5	Macrophages	0.531915	0.0476073	0.40625	0.0550049	Endothelial	1.54273	2.90033	4.2305e-74
NKG7	Macrophages	0.287234	0.000412541	0.0105263	0.00479363	Oocyte	1.53396	5.34047	3.33115e-93
AIF1	Macrophages	0.345745	0.00684818	0.0375	0.0120247	Endothelial	1.52847	4.42079	3.46024e-79
ARPC1B	Macrophages	0.760638	0.128465	0.612613	0.138122	PGC	1.50578	1.97962	2.10858e-82
TGFB1	Macrophages	0.585106	0.0706271	0.34375	0.0784855	Endothelial	1.489	2.54484	8.47052e-71
KLRB1	Macrophages	0.276596	0.000577558	0.003125	0.00479363	Endothelial	1.47715	5.34047	1.69948e-87
GIMAP7	Macrophages	0.287234	0.00264026	0.084375	0.00698733	Endothelial	1.42573	4.96366	1.47819e-76
HCLS1	Macrophages	0.276596	0.00181518	0.00900901	0.00601235	PGC	1.41449	5.11394	1.27157e-77
RUNX3	Macrophages	0.265957	0.000907591	0.00578035	0.00495613	Erythroid	1.41147	5.30713	1.40255e-80
FERMT3	Macrophages	0.329787	0.00915842	0.0346821	0.0140559	Erythroid	1.40645	4.26471	1.52135e-68
RIPOR2	Macrophages	0.324468	0.00866337	0.0164063	0.0134872	Mesenchymal	1.39717	4.30602	3.71076e-68
CD44	Macrophages	0.585106	0.0843234	0.404624	0.0919727	Erythroid	1.39622	2.38626	2.14768e-63
LYZ	Macrophages	0.292553	0.00429043	0.10625	0.00869353	Endothelial	1.38822	4.74518	3.67515e-71
RGCC	Macrophages	0.505319	0.0605611	0.409375	0.0673546	Endothelial	1.36324	2.69778	3.28435e-59
CD83	Macrophages	0.409574	0.030363	0.1125	0.0361553	Endothelial	1.35976	3.31993	7.07064e-60
TIGIT	Macrophages	0.260638	0.00156766	0.0421053	0.00552486	Oocyte	1.35493	5.1985	7.87158e-74
TBC1D10C	Macrophages	0.260638	0.00165017	0.018018	0.00560611	PGC	1.35112	5.1839	2.64216e-73
IFI30	Macrophages	0.345745	0.0160066	0.0431078	0.0210432	Supporting	1.33498	3.86118	1.24674e-60
SLA	Macrophages	0.287234	0.00536304	0.0195489	0.00966851	Supporting	1.33244	4.63888	5.59719e-66
PSMB9	Macrophages	0.606383	0.103713	0.48125	0.111391	Endothelial	1.33083	2.19471	5.25841e-59
C1QA	Macrophages	0.260638	0.00272277	0.00900901	0.00666233	PGC	1.30613	5.01129	1.46973e-67
C1QB	Macrophages	0.265957	0.00338284	0.018018	0.00739357	PGC	1.30509	4.90715	2.16978e-66
NCKAP1L	Macrophages	0.25	0.00181518	0.00625	0.00560611	Endothelial	1.29597	5.1839	8.71769e-69
BATF	Macrophages	0.244681	0.00140264	0.0030426	0.00511862	Mesothelial	1.29066	5.27487	1.42963e-69
DOK2	Macrophages	0.271277	0.00453795	0.027027	0.00861228	PGC	1.2898	4.75457	8.85239e-64
PSTPIP1	Macrophages	0.25	0.00206271	0.018018	0.00584985	PGC	1.28533	5.14134	2.01465e-67
WAS	Macrophages	0.244681	0.00156766	0.00578035	0.00528112	Erythroid	1.28301	5.24362	1.5833e-68
LAT2	Macrophages	0.303191	0.0101485	0.045045	0.0146246	PGC	1.281	4.22505	4.8563e-59
MS4A7	Macrophages	0.239362	0.00115512	0.018018	0.00479363	PGC	1.2783	5.34047	1.6397e-69
GIMAP6	Macrophages	0.287234	0.00742574	0.253125	0.0116997	Endothelial	1.27767	4.44819	2.21943e-60
C1QC	Macrophages	0.244681	0.00173267	0.00460829	0.00544361	Oogonia_meiotic	1.2756	5.21331	1.56504e-67
ACAP1	Macrophages	0.234043	0.000742574	0.00421496	0.00430614	Oogonia_STRA8	1.275	5.44771	5.31015e-71
AIM2	Macrophages	0.276596	0.00585809	0.015625	0.0099935	Endothelial	1.27395	4.60582	2.47374e-61
TNFAIP3	Macrophages	0.404255	0.0382013	0.128125	0.0437927	Endothelial	1.26463	3.12829	3.91385e-52
BIN2	Macrophages	0.335106	0.0183993	0.135135	0.0232369	PGC	1.26067	3.76201	9.6387e-55
COTL1	Macrophages	0.62766	0.12731	0.540541	0.134953	PGC	1.2571	2.00283	3.34538e-54
GIMAP4	Macrophages	0.319149	0.014934	0.490625	0.0195808	Endothelial	1.25528	3.93321	2.37433e-55
ARRB2	Macrophages	0.430851	0.049505	0.207207	0.0553299	PGC	1.24707	2.89444	3.49163e-50
NCF4	Macrophages	0.223404	0.000412541	0.00625	0.00381865	Endothelial	1.24388	5.56786	1.30574e-70
WIPF1	Macrophages	0.404255	0.0405941	0.14375	0.0461488	Endothelial	1.24344	3.07588	2.11076e-50
REL	Macrophages	0.5	0.0778878	0.2375	0.0843354	Endothelial	1.23648	2.47295	3.54023e-49
GZMK	Macrophages	0.218085	0.000247525	0.000501253	0.00357491	Supporting	1.22865	5.63382	9.77431e-71
HLA-DMA	Macrophages	0.276596	0.00767327	0.190625	0.011781	Endothelial	1.22844	4.44127	8.35049e-57
BIRC3	Macrophages	0.308511	0.0141914	0.0507099	0.018687	Mesothelial	1.22785	3.97993	1.04221e-53
CYBB	Macrophages	0.223404	0.000907591	0.00900901	0.00430614	PGC	1.21704	5.44771	5.12978e-66
ORAI1	Macrophages	0.521277	0.0910066	0.353125	0.0975788	Endothelial	1.21306	2.32709	1.18857e-47
PSMB8	Macrophages	0.574468	0.115264	0.4875	0.122278	Endothelial	1.20722	2.10146	2.05326e-48
SPI1	Macrophages	0.244681	0.00379538	0.00912779	0.00747481	Mesothelial	1.19801	4.89622	3.04354e-58
CDH5	Endothelial	0.8	0.00525526	0.0630631	0.0259181	PGC	2.92225	3.65281	0
ESAM	Endothelial	0.709375	0.00850851	0.027027	0.0267306	PGC	2.56932	3.62195	2.3168e-317
PECAM1	Endothelial	0.75	0.0145145	0.36036	0.0336367	PGC	2.5441	3.39214	5.62735e-312
EMCN	Endothelial	0.6625	0.00442109	0.017341	0.0215307	Erythroid	2.54286	3.83827	5.61942e-317
MYCT1	Endothelial	0.6375	0.00283617	0.00737619	0.019337	Oogonia_STRA8	2.51541	3.94573	6.67179e-316
CD93	Endothelial	0.634375	0.00600601	0.0957447	0.0223432	Macrophages	2.41141	3.80123	4.44347e-288
RASIP1	Endothelial	0.615625	0.00533867	0.0630631	0.0212057	PGC	2.3723	3.85348	1.27456e-281
SOX18	Endothelial	0.6	0.00583917	0.0900901	0.021287	PGC	2.3098	3.84966	5.8248e-269
TIE1	Endothelial	0.55625	0.0025025	0.0319149	0.0168996	Macrophages	2.26976	4.08047	4.8564e-270
LMO2	Endothelial	0.65	0.0148482	0.387387	0.0313617	PGC	2.25041	3.46217	6.21026e-252
SRGN	Endothelial	0.609375	0.0229396	0.904255	0.0381865	Macrophages	1.98978	3.26527	1.18168e-203
SOX7	Endothelial	0.4875	0.00467134	0.00900901	0.0172246	PGC	1.97994	4.06142	8.42738e-213
CLEC3B	Endothelial	0.575	0.0185185	0.0414062	0.0329867	Mesenchymal	1.9617	3.41165	5.24039e-199
GIMAP4	Endothelial	0.490625	0.00700701	0.319149	0.0195808	Macrophages	1.92973	3.93321	1.87488e-200
ADGRF5	Endothelial	0.50625	0.00975976	0.036036	0.0226682	PGC	1.91706	3.78679	2.03287e-195
TMEM88	Endothelial	0.59375	0.0271104	0.126775	0.0418427	Mesothelial	1.88447	3.17384	1.49686e-185
ERG	Endothelial	0.46875	0.00617284	0.0132812	0.0181995	Mesenchymal	1.87798	4.00636	1.88922e-193
KANK3	Endothelial	0.48125	0.00909243	0.324324	0.0213682	PGC	1.85082	3.84585	1.97164e-185
C1orf115	Endothelial	0.5125	0.0145145	0.216216	0.0274618	PGC	1.84242	3.59496	2.06202e-180
TNFSF10	Endothelial	0.4375	0.00408742	0.101064	0.0153559	Macrophages	1.82711	4.17626	1.3151e-189
TM4SF18	Endothelial	0.421875	0.00233567	0.00900901	0.0132434	PGC	1.82429	4.32425	1.0145e-194
FLT1	Endothelial	0.521875	0.0176009	0.221053	0.0307117	Oocyte	1.81775	3.48311	2.48339e-175
CCND1	Endothelial	0.590625	0.0333667	0.0990991	0.0478551	PGC	1.79525	3.03958	8.7091e-171
CYYR1	Endothelial	0.45	0.00884218	0.0415822	0.020312	Mesothelial	1.75344	3.89654	1.67508e-170
CD34	Endothelial	0.7125	0.075659	0.200521	0.0922164	Mesenchymal	1.69833	2.38362	9.24071e-165
EGFL7	Endothelial	0.91875	0.145062	0.351351	0.165177	PGC	1.65443	1.80074	1.89126e-199
AFAP1L1	Endothelial	0.465625	0.0171004	0.117117	0.0287618	PGC	1.65237	3.54871	7.72863e-150
KDR	Endothelial	0.546875	0.0387888	0.311359	0.0519987	Mesothelial	1.61686	2.95654	9.59032e-142
TRIM22	Endothelial	0.53125	0.0351185	0.276596	0.0480175	Macrophages	1.61298	3.03619	4.58214e-141
EPAS1	Endothelial	0.503125	0.0287788	0.0641604	0.0411115	Supporting	1.60571	3.19147	2.95598e-140
PCDH12	Endothelial	0.340625	0.001001	0.00531915	0.009831	Macrophages	1.57444	4.62221	1.20144e-163
TEK	Endothelial	0.39375	0.00850851	0.0273834	0.0185245	Mesothelial	1.57053	3.98866	8.0518e-144
APOLD1	Endothelial	0.36875	0.00583917	0.0210526	0.0152746	Oocyte	1.54195	4.18156	1.87084e-143
ROBO4	Endothelial	0.33125	0.001001	0.00578035	0.00958726	Erythroid	1.53942	4.64732	1.58284e-158
VWF	Endothelial	0.478125	0.0354521	0.642105	0.0469613	Oocyte	1.46231	3.05843	2.24575e-118
EFNA1	Endothelial	0.5125	0.0455455	0.306306	0.0576861	PGC	1.46203	2.85274	5.21442e-118
MMRN2	Endothelial	0.325	0.00275275	0.0110599	0.011131	Oogonia_meiotic	1.46186	4.49802	1.78453e-139
LYVE1	Endothelial	0.325	0.003003	0.0691489	0.0113747	Macrophages	1.45482	4.47636	1.03203e-137
SOX17	Endothelial	0.4125	0.0196029	0.576577	0.029818	PGC	1.44897	3.51264	1.00635e-119
RAMP2	Endothelial	0.859375	0.168252	0.432432	0.18622	PGC	1.44446	1.68082	3.43331e-153
CD74	Endothelial	0.38125	0.0135135	0.414894	0.0230744	Macrophages	1.43694	3.76903	4.42825e-121
ETS1	Endothelial	0.653125	0.0984318	0.43617	0.112853	Macrophages	1.4249	2.18167	3.5444e-119
S100A16	Endothelial	0.70625	0.118035	0.240104	0.133328	Mesenchymal	1.42305	2.01494	2.60385e-124
TSPAN18	Endothelial	0.46875	0.037037	0.0822055	0.0482613	Supporting	1.42084	3.03113	2.38045e-112
ACVRL1	Endothelial	0.375	0.0135135	0.0361979	0.0229119	Mesenchymal	1.41604	3.7761	2.63563e-118
FLI1	Endothelial	0.3375	0.00700701	0.138298	0.0155996	Macrophages	1.40417	4.16051	9.18086e-123
CAVIN2	Endothelial	0.609375	0.0867534	0.210156	0.100341	Mesenchymal	1.40106	2.29918	1.40298e-112
BCL6B	Endothelial	0.3	0.002002	0.027027	0.00974976	PGC	1.38915	4.63051	3.34687e-132
ST3GAL1	Endothelial	0.453125	0.0374541	0.218085	0.0482613	Macrophages	1.37348	3.03113	1.21225e-105
PALM2AKAP2	Endothelial	0.534375	0.0682349	0.148698	0.0803542	Mesenchymal	1.34733	2.52131	1.01949e-101
HHEX	Endothelial	0.396875	0.0247748	0.333333	0.0344491	PGC	1.33678	3.36827	4.79591e-103
OAS1	Endothelial	0.459375	0.0442109	0.202128	0.0550049	Macrophages	1.33234	2.90033	2.06426e-99
ICAM2	Endothelial	0.3	0.00458792	0.180851	0.0122684	Macrophages	1.32022	4.40072	9.25356e-116
LIMCH1	Endothelial	0.51875	0.068652	0.327586	0.0803542	Mesothelial	1.30793	2.52131	7.07976e-96
TINAGL1	Endothelial	0.3625	0.0191859	0.0497396	0.0281118	Mesenchymal	1.29469	3.57157	1.46446e-99
CRIP2	Endothelial	0.503125	0.0658158	0.235294	0.0771856	Mesothelial	1.28878	2.56154	5.42408e-93
ETS2	Endothelial	0.575	0.0958458	0.297872	0.108304	Macrophages	1.27812	2.22282	1.14403e-93
USHBP1	Endothelial	0.26875	0.00175175	0.0159574	0.00869353	Macrophages	1.27527	4.74518	4.68925e-118
SNRK	Endothelial	0.575	0.0965966	0.202128	0.109035	Macrophages	1.27425	2.21609	3.82319e-93
THSD1	Endothelial	0.303125	0.00734067	0.0210526	0.0150309	Oocyte	1.27241	4.19765	2.651e-105
DUSP6	Endothelial	0.615625	0.114114	0.191489	0.127153	Macrophages	1.26964	2.06236	6.32465e-95
ARHGEF15	Endothelial	0.259375	0.000917584	0.00276498	0.00763731	Oogonia_meiotic	1.26438	4.87471	6.13639e-121
DLL4	Endothelial	0.271875	0.00258592	0.00900901	0.00958726	PGC	1.26349	4.64732	1.8428e-113
APOD	Endothelial	0.475	0.0611445	0.170833	0.0719045	Mesenchymal	1.2504	2.63242	1.46586e-87
C1orf54	Endothelial	0.290625	0.00617284	0.126126	0.0135684	PGC	1.24969	4.30001	4.73755e-104
PREX2	Endothelial	0.290625	0.00617284	0.0122396	0.0135684	Mesenchymal	1.24969	4.30001	4.73755e-104
SMAGP	Endothelial	0.371875	0.026026	0.594595	0.0350179	PGC	1.24649	3.3519	3.85531e-91
HLX	Endothelial	0.296875	0.00800801	0.0315789	0.0155184	Oocyte	1.2367	4.16573	4.79687e-100
MECOM	Endothelial	0.26875	0.00316984	0.0136986	0.0100747	Oogonia_STRA8	1.23564	4.59772	3.40907e-108
TAGLN2	Endothelial	0.809375	0.202286	0.617021	0.21807	Macrophages	1.23263	1.52294	1.8428e-113
THY1	Endothelial	0.8125	0.206707	0.539323	0.222457	Mesenchymal	1.22121	1.50302	1.74065e-112
ADAM15	Endothelial	0.428125	0.048632	0.138945	0.0584985	Mesothelial	1.21534	2.83875	1.91351e-83
CTSH	Endothelial	0.45625	0.0598932	0.297872	0.0701982	Macrophages	1.212	2.65643	2.21698e-82
PPP2R5A	Endothelial	0.4875	0.0727394	0.231579	0.0835229	Oocyte	1.21028	2.48263	4.68992e-82
RBP5	Endothelial	0.2875	0.00792459	0.0171875	0.0151934	Mesenchymal	1.20373	4.1869	4.26442e-96
SLC9A3R2	Endothelial	0.46875	0.0678178	0.168421	0.0782418	Oocyte	1.19435	2.54795	7.48172e-80
PDGFB	Endothelial	0.3	0.0115949	0.198198	0.0190933	PGC	1.18753	3.95842	9.80035e-91
FXYD5	Endothelial	0.40625	0.045629	0.531915	0.0550049	Macrophages	1.17826	2.90033	5.13109e-79
ST8SIA4	Endothelial	0.275	0.00692359	0.207447	0.0138934	Macrophages	1.17599	4.27634	5.81593e-94
SHC1	Endothelial	0.746875	0.192693	0.338346	0.207101	Supporting	1.17599	1.57455	5.95489e-96
LRRC32	Endothelial	0.303125	0.0131798	0.037234	0.0207182	Macrophages	1.17514	3.87674	4.10105e-88
TGFBR2	Endothelial	0.496875	0.0838338	0.287234	0.0945726	Macrophages	1.17182	2.35839	5.92124e-77
MEF2C	Endothelial	0.50625	0.0881715	0.211529	0.0990413	Supporting	1.17056	2.31222	6.19036e-77
EDN1	Endothelial	0.28125	0.00850851	0.0273834	0.0155996	Mesothelial	1.17014	4.16051	2.05068e-91
ITGA5	Endothelial	0.396875	0.0433767	0.096875	0.0525674	Mesenchymal	1.16906	2.94566	3.87381e-78
PRKCH	Endothelial	0.29375	0.0115115	0.287234	0.0188495	Macrophages	1.16656	3.97127	2.73243e-88
ENG	Endothelial	0.6375	0.147898	0.299219	0.160627	Mesenchymal	1.16578	1.82867	8.22364e-83
FAM89A	Endothelial	0.396875	0.0441275	0.225225	0.0532987	PGC	1.16358	2.93184	2.2997e-77
ARAP3	Endothelial	0.303125	0.0140974	0.0356771	0.021612	Mesenchymal	1.16234	3.83451	5.24559e-86
AQP1	Endothelial	0.396875	0.0463797	0.380325	0.0554924	Mesothelial	1.14757	2.89151	3.9009e-75
APOL2	Endothelial	0.446875	0.0699867	0.303191	0.0797855	Macrophages	1.12988	2.52841	2.55851e-71
PRCP	Endothelial	0.484375	0.0870037	0.279279	0.0973351	PGC	1.1284	2.3296	4.45352e-71
SPNS2	Endothelial	0.234375	0.00208542	0.0105263	0.0081248	Oocyte	1.12801	4.81283	4.45486e-98
RASGRP3	Endothelial	0.26875	0.00834168	0.037234	0.0151121	Macrophages	1.12667	4.19226	1.9026e-86
GIMAP6	Endothelial	0.253125	0.00525526	0.287234	0.0116997	Macrophages	1.12595	4.44819	2.11218e-90
FAM167B	Endothelial	0.228125	0.00166834	0.0040568	0.00755606	Mesothelial	1.11448	4.88541	5.22379e-98
LPAR6	Endothelial	0.25	0.00525526	0.0212766	0.0116185	Macrophages	1.11379	4.45516	5.95028e-89
C1QTNF5	Endothelial	0.48125	0.088672	0.178125	0.0988788	Mesenchymal	1.11355	2.31386	4.2818e-69
FAM171A1	Endothelial	0.471875	0.0845846	0.160243	0.0946539	Mesothelial	1.11246	2.35753	6.66491e-69
RGCC	Endothelial	0.409375	0.0582249	0.505319	0.0673546	Macrophages	1.10441	2.69778	1.04692e-68
LDHAL6A	lowQC	0.100546	0.0665161	0.915789	0.0736107	Oocyte	0.26232	2.60897	0.000133188

## Sheet: 2_mouse_Niu2020
gene	cluster	geneFrequency	geneFrequencyOutsideCluster	geneFrequencySecondBest	geneFrequencyGlobal	secondBestClusterName	tfidf	idf	qval
DPPA4	PGC	0.816372	0.0347235	0.643786	0.0420403	Oogonia_STRA8	2.58719	3.16913	0
FOXR1	PGC	0.75	0.0254834	0.559971	0.0322654	Oogonia_STRA8	2.57532	3.43376	0
SOX2	PGC	0.798673	0.0347026	0.729046	0.0418539	Oogonia_STRA8	2.53464	3.17357	0
SALL4	PGC	0.871681	0.0487091	0.767341	0.0564127	Oogonia_STRA8	2.50614	2.87506	0
AP3B2	PGC	0.721239	0.0250235	0.421965	0.0315406	Oogonia_STRA8	2.49295	3.45648	0
DND1	PGC	0.878319	0.0537264	0.767341	0.0614451	Oogonia_STRA8	2.45017	2.78961	0
POU5F1	PGC	0.940265	0.0700533	0.91474	0.0781991	Oogonia_STRA8	2.39626	2.5485	0
TUBA3D	PGC	0.853982	0.0587854	0.797688	0.066229	Oogonia_STRA8	2.31825	2.71464	0
PLCG2	PGC	0.696903	0.0319431	0.435694	0.0381676	Oogonia_STRA8	2.27592	3.26577	0
RBMXL3	PGC	0.818584	0.0569876	0.660405	0.0641166	Oogonia_STRA8	2.24869	2.74705	0
LIN28A	PGC	0.668142	0.0285983	0.450867	0.0345849	Oogonia_STRA8	2.24785	3.36434	0
GJB3	PGC	0.643805	0.0248145	0.445087	0.0306087	Oogonia_STRA8	2.24461	3.48647	0
DPPA2	PGC	0.544248	0.0113515	0.315751	0.0163398	Oogonia_STRA8	2.23912	4.11415	0
PHLDA2	PGC	0.860619	0.0687154	0.949422	0.0761282	Oogonia_STRA8	2.21639	2.57534	0
TFAP2C	PGC	0.557522	0.01478	0.384393	0.0198604	Oogonia_STRA8	2.18494	3.91903	2.91153e-310
DDX4	PGC	0.924779	0.0899341	0.889966	0.0977489	Oogonia_meiotic	2.15044	2.32535	0
DPPA5	PGC	0.949115	0.0964775	0.980491	0.104459	Oogonia_STRA8	2.14402	2.25896	0
IGFBPL1	PGC	0.581858	0.0201317	0.372832	0.0253899	Oogonia_STRA8	2.1374	3.67341	4.61265e-300
ALPL	PGC	0.710177	0.0431692	0.529624	0.0494129	Oogonia_STRA8	2.13589	3.00754	3.13078e-312
TCL1A	PGC	0.579646	0.0198808	0.345376	0.0251206	Oogonia_STRA8	2.13545	3.68407	1.36165e-299
DPPA3	PGC	0.949115	0.100303	0.980491	0.108249	Oogonia_STRA8	2.11019	2.22332	0
GLDC	PGC	0.603982	0.0265705	0.38078	0.0319755	Oogonia_STRA8	2.07938	3.44279	9.7687e-289
TRIM71	PGC	0.70354	0.0485001	0.461705	0.0546317	Oogonia_STRA8	2.04529	2.90714	1.21145e-292
STK31	PGC	0.933628	0.10532	0.98145	0.113074	Oogonia_meiotic	2.03504	2.17971	0
MAP7D2	PGC	0.940265	0.107076	0.951096	0.114876	Oogonia_meiotic	2.03465	2.16391	0
ZFP42	PGC	0.60177	0.0288701	0.348266	0.0342328	Oogonia_STRA8	2.03072	3.37457	2.16078e-278
SCT	PGC	0.719027	0.0534337	0.746387	0.0596641	Oogonia_STRA8	2.02695	2.81902	1.60272e-291
SPTBN2	PGC	0.577434	0.0267377	0.405347	0.0318926	Oogonia_STRA8	1.98948	3.44538	1.62864e-268
FKBP6	PGC	0.942478	0.11362	0.956577	0.121378	Oogonia_meiotic	1.98754	2.10884	0
ELAVL2	PGC	0.915929	0.10693	0.842327	0.114503	Oogonia_meiotic	1.98496	2.16716	0
EMB	PGC	0.849558	0.0906658	0.745665	0.0977696	Oogonia_STRA8	1.97534	2.32514	6.82172e-313
SOHLH2	PGC	0.663717	0.0453225	0.567919	0.0511111	Oogonia_STRA8	1.97373	2.97375	1.62393e-272
RNF17	PGC	0.80531	0.0806941	0.829258	0.087477	Oogonia_meiotic	1.96204	2.43638	2.65607e-297
CALCOCO2	PGC	0.473451	0.0118951	0.360549	0.0162155	Oogonia_STRA8	1.95146	4.12178	6.38824e-262
C2orf88	PGC	0.473451	0.0130657	0.253613	0.0173753	Oogonia_STRA8	1.91876	4.05271	1.18558e-254
MYBL2	PGC	0.818584	0.0912721	0.515173	0.0980802	Oogonia_STRA8	1.90073	2.32197	9.7687e-289
NR6A1	PGC	0.730088	0.0679419	0.558179	0.07414	Oogonia_meiotic	1.89954	2.6018	5.57886e-268
L1TD1	PGC	0.528761	0.0228285	0.289017	0.0275644	Oogonia_STRA8	1.8989	3.59123	1.61682e-248
REC114	PGC	0.778761	0.0823665	0.612142	0.0888852	Oogonia_meiotic	1.88492	2.42041	2.45016e-275
PLA2G10	PGC	0.449115	0.0114979	0.226156	0.0155943	Oogonia_STRA8	1.8687	4.16085	1.17203e-245
AL365232.1	PGC	0.404867	0.00622975	0.169798	0.00996127	Oogonia_STRA8	1.86605	4.60905	1.64579e-251
MOV10L1	PGC	0.734513	0.0732518	0.850337	0.0794417	Oogonia_meiotic	1.86033	2.53273	4.76941e-261
DAZ1	PGC	0.935841	0.129842	0.993255	0.137387	Oogonia_meiotic	1.8576	1.98495	0
LRRC34	PGC	0.599558	0.0402425	0.407514	0.0454781	Oogonia_STRA8	1.85295	3.09052	8.36454e-242
DMRT1	PGC	0.526549	0.0250653	0.400289	0.0297596	Oogonia_STRA8	1.85061	3.5146	1.92367e-238
HSF2BP	PGC	0.70354	0.0671057	0.796796	0.0730631	Oogonia_meiotic	1.84076	2.61643	1.15471e-251
SYT5	PGC	0.513274	0.0239574	0.335983	0.0285377	Oogonia_STRA8	1.82548	3.55653	3.02034e-233
COX7A1	PGC	0.860619	0.113223	0.802023	0.120219	Oogonia_STRA8	1.82317	2.11844	2.5042e-286
TDRKH	PGC	0.774336	0.0892652	0.804806	0.0956779	Oogonia_meiotic	1.81719	2.34677	5.9446e-261
TEX14	PGC	0.814159	0.100805	0.75801	0.107482	Oogonia_meiotic	1.81592	2.23043	1.00004e-270
SLC25A31	PGC	0.778761	0.0907495	0.952782	0.0971897	Oogonia_meiotic	1.81536	2.33109	1.3255e-261
PORCN	PGC	0.564159	0.0352043	0.461705	0.0401557	Oogonia_STRA8	1.81377	3.21499	7.64406e-232
ASZ1	PGC	0.654867	0.0578029	0.706998	0.0633918	Oogonia_meiotic	1.8064	2.75842	6.09536e-238
FAM169A	PGC	0.652655	0.057782	0.437139	0.0633504	Oogonia_STRA8	1.80072	2.75907	1.4816e-236
STAG3	PGC	0.705752	0.0737326	0.75253	0.0796488	Oogonia_meiotic	1.78564	2.53013	3.5219e-241
GDF3	PGC	0.426991	0.0113933	0.237717	0.0152836	Oogonia_STRA8	1.78524	4.18097	1.67674e-229
HORMAD1	PGC	0.74115	0.0847288	0.924115	0.0908733	Oogonia_meiotic	1.77749	2.39829	5.05976e-246
ESPL1	PGC	0.734513	0.0830563	0.512226	0.0891544	Oogonia_meiotic	1.7756	2.41739	2.24024e-244
MSX2	PGC	0.595133	0.0455942	0.471098	0.0507383	Oogonia_STRA8	1.77413	2.98107	1.049e-225
TIGAR	PGC	0.595133	0.045636	0.343931	0.0507797	Oogonia_STRA8	1.77365	2.98026	1.29961e-225
SYCE1	PGC	0.701327	0.0746734	0.88027	0.0805393	Oogonia_meiotic	1.76665	2.51901	9.70235e-237
KLF5	PGC	0.778761	0.0977318	0.627057	0.104107	Epithelial	1.76182	2.26234	4.07812e-251
CPEB1	PGC	0.676991	0.068569	0.765599	0.0742643	Oogonia_meiotic	1.76026	2.60012	8.46052e-232
MAEL	PGC	0.747788	0.0910003	0.948567	0.0971483	Oogonia_meiotic	1.74348	2.33152	9.94889e-241
SMC1B	PGC	0.946903	0.154218	0.999578	0.161638	Oogonia_meiotic	1.72563	1.8224	4.0185e-303
DUSP9	PGC	0.904867	0.142532	0.843931	0.149668	Oogonia_STRA8	1.71865	1.89934	3.38961e-282
EPCAM	PGC	0.929204	0.150936	0.923218	0.158221	Epithelial	1.71323	1.84376	7.66692e-292
PCGF5	PGC	0.869469	0.133229	0.78457	0.140121	Oogonia_meiotic	1.70873	1.96525	8.00222e-267
CAD	PGC	0.823009	0.119954	0.587428	0.126535	Oogonia_STRA8	1.70135	2.06724	8.96373e-251
SLC22A18	PGC	0.446903	0.0187938	0.34104	0.0228012	Oogonia_STRA8	1.68971	3.78094	3.39509e-207
MAGEB16	PGC	0.526549	0.0365005	0.383671	0.0410877	Oogonia_STRA8	1.68077	3.19205	7.88496e-204
ARID3B	PGC	0.64823	0.0694052	0.421965	0.0748235	Oogonia_STRA8	1.68062	2.59262	1.97368e-212
PECAM1	PGC	0.553097	0.0450298	0.909594	0.0497857	Endothelial	1.65931	3.00003	1.95577e-200
UBE2T	PGC	0.933628	0.16212	0.816189	0.169342	Oogonia_meiotic	1.65797	1.77584	4.85442e-283
RAB6B	PGC	0.685841	0.0835372	0.455202	0.0891751	Oogonia_STRA8	1.65778	2.41715	4.39384e-213
RBM44	PGC	0.530973	0.0394899	0.490725	0.0440905	Oogonia_meiotic	1.65744	3.12151	2.67906e-199
POLE	PGC	0.743363	0.103773	0.577993	0.10976	Oogonia_meiotic	1.64243	2.20946	3.13144e-220
NFATC2IP	PGC	0.79646	0.121647	0.528902	0.127964	Oogonia_STRA8	1.63753	2.05601	2.7405e-231
PTPN6	PGC	0.542035	0.0444653	0.591675	0.049123	Macrophages	1.63339	3.01343	6.90083e-195
TAF5	PGC	0.89823	0.15681	0.779933	0.16375	Oogonia_meiotic	1.62527	1.80941	3.74764e-261
STRA8	PGC	0.615044	0.066144	0.79552	0.0712821	Oogonia_STRA8	1.6244	2.64111	5.66804e-198
ENDOG	PGC	0.820796	0.133333	0.669075	0.139768	Oogonia_STRA8	1.61514	1.96777	2.07783e-233
FANCD2	PGC	0.595133	0.0614195	0.450253	0.0664154	Oogonia_meiotic	1.6139	2.71183	3.44645e-194
CEP89	PGC	0.838496	0.139814	0.553468	0.146354	Oogonia_STRA8	1.61136	1.92173	8.11867e-238
KIF2C	PGC	0.803097	0.128421	0.497832	0.134736	Oogonia_STRA8	1.60976	2.00444	1.28541e-227
KIT	PGC	0.676991	0.0876973	0.445087	0.0932135	Oogonia_STRA8	1.60641	2.37286	6.9366e-202
C6orf136	PGC	0.847345	0.14364	0.852445	0.150227	Oogonia_meiotic	1.60624	1.89561	1.54391e-239
RBM46	PGC	0.827434	0.13764	0.810287	0.144097	Oogonia_meiotic	1.60296	1.93727	6.0916e-233
TEX12	PGC	0.672566	0.0870283	0.958685	0.0925094	Oogonia_meiotic	1.60101	2.38045	3.2049e-200
GCLC	PGC	0.79646	0.128504	0.559971	0.134757	Oogonia_STRA8	1.59633	2.00428	2.51487e-223
EDDM13	PGC	0.365044	0.00955367	0.202312	0.0128813	Oogonia_STRA8	1.58866	4.35198	1.17777e-194
SHMT1	PGC	0.75885	0.117445	0.437861	0.123449	Oogonia_STRA8	1.58746	2.09192	7.80026e-213
PRKCZ	PGC	0.688053	0.0948678	0.472543	0.10042	Oogonia_STRA8	1.58141	2.29839	9.60016e-199
PHF19	PGC	0.435841	0.0228285	0.304913	0.0266946	Oogonia_STRA8	1.57918	3.6233	5.18449e-185
GPAT2	PGC	0.579646	0.0611686	0.783727	0.0660219	Oogonia_meiotic	1.57534	2.71777	1.4633e-185
CPNE5	PGC	0.727876	0.109794	0.597543	0.11558	Oogonia_STRA8	1.57061	2.15779	2.07331e-203
FBXO15	PGC	0.482301	0.034389	0.401771	0.0385818	Oogonia_meiotic	1.56988	3.25497	1.4632e-181
CCNF	PGC	0.679204	0.0939898	0.387283	0.0994678	Oogonia_STRA8	1.56755	2.30792	8.97588e-195
ESRRB	PGC	0.325221	0.00510087	0.140896	0.00809742	Oogonia_STRA8	1.56633	4.81621	4.05655e-198
POLD1	PGC	0.887168	0.164378	0.689306	0.171143	Oogonia_STRA8	1.56608	1.76525	2.39416e-245
PHLDA2	Oogonia_STRA8	0.949422	0.0503593	0.860619	0.0761282	PGC	2.44508	2.57534	0
POU5F1	Oogonia_STRA8	0.91474	0.0535147	0.940265	0.0781991	PGC	2.33121	2.5485	0
SOX2	Oogonia_STRA8	0.729046	0.0215764	0.798673	0.0418539	PGC	2.31368	3.17357	0
DPPA5	Oogonia_STRA8	0.980491	0.078609	0.949115	0.104459	PGC	2.21489	2.25896	0
SALL4	Oogonia_STRA8	0.767341	0.0354348	0.871681	0.0564127	PGC	2.20615	2.87506	0
DPPA3	Oogonia_STRA8	0.980491	0.0825107	0.949115	0.108249	PGC	2.17995	2.22332	0
TUBA3D	Oogonia_STRA8	0.797688	0.0446453	0.853982	0.066229	PGC	2.16543	2.71464	0
DND1	Oogonia_STRA8	0.767341	0.0406157	0.878319	0.0614451	PGC	2.14058	2.78961	0
SCT	Oogonia_STRA8	0.746387	0.0394005	0.719027	0.0596641	PGC	2.10408	2.81902	0
STRA8	Oogonia_STRA8	0.79552	0.0499115	0.615044	0.0712821	PGC	2.10106	2.64111	0
DPPA4	Oogonia_STRA8	0.643786	0.0242842	0.816372	0.0420403	PGC	2.04024	3.16913	0
DDX4	Oogonia_STRA8	0.872832	0.0748779	0.924779	0.0977489	PGC	2.02964	2.32535	0
STK31	Oogonia_STRA8	0.916185	0.0893759	0.98145	0.113074	Oogonia_meiotic	1.99702	2.17971	0
FKBP6	Oogonia_STRA8	0.926301	0.097627	0.956577	0.121378	Oogonia_meiotic	1.95342	2.10884	0
FOXR1	Oogonia_STRA8	0.559971	0.016694	0.75	0.0322654	PGC	1.92281	3.43376	0
MAP7D2	Oogonia_STRA8	0.884393	0.0921689	0.951096	0.114876	Oogonia_meiotic	1.91374	2.16391	0
DAZ1	Oogonia_STRA8	0.961705	0.113063	0.993255	0.137387	Oogonia_meiotic	1.90894	1.98495	0
RBMXL3	Oogonia_STRA8	0.660405	0.0465215	0.818584	0.0641166	PGC	1.81417	2.74705	0
SLC25A31	Oogonia_STRA8	0.763728	0.0775217	0.952782	0.0971897	Oogonia_meiotic	1.78032	2.33109	0
SMC1B	Oogonia_STRA8	0.955925	0.1382	0.999578	0.161638	Oogonia_meiotic	1.74208	1.8224	0
EMB	Oogonia_STRA8	0.745665	0.0786517	0.849558	0.0977696	PGC	1.73378	2.32514	0
ELAVL2	Oogonia_STRA8	0.78685	0.0946635	0.915929	0.114503	PGC	1.70523	2.16716	0
COX7A1	Oogonia_STRA8	0.802023	0.1001	0.860619	0.120219	PGC	1.69904	2.11844	0
SOHLH2	Oogonia_STRA8	0.567919	0.0358612	0.663717	0.0511111	PGC	1.68885	2.97375	0
MAEL	Oogonia_STRA8	0.699422	0.0793766	0.948567	0.0971483	Oogonia_meiotic	1.63071	2.33152	0
TEX12	Oogonia_STRA8	0.677746	0.0752404	0.958685	0.0925094	Oogonia_meiotic	1.61334	2.38045	0
TEX14	Oogonia_STRA8	0.719653	0.0894186	0.814159	0.107482	PGC	1.60514	2.23043	0
RNF17	Oogonia_STRA8	0.658237	0.0706351	0.829258	0.087477	Oogonia_meiotic	1.60372	2.43638	0
DUSP9	Oogonia_STRA8	0.843931	0.129182	0.904867	0.149668	PGC	1.60291	1.89934	0
HSF2BP	Oogonia_STRA8	0.611272	0.0571818	0.796796	0.0730631	Oogonia_meiotic	1.59935	2.61643	0
ALPL	Oogonia_STRA8	0.529624	0.0352429	0.710177	0.0494129	PGC	1.59287	3.00754	0
SYCP1	Oogonia_STRA8	0.773844	0.108948	0.990725	0.128005	Oogonia_meiotic	1.59078	2.05568	0
GJB3	Oogonia_STRA8	0.445087	0.0183784	0.643805	0.0306087	PGC	1.55178	3.48647	0
HORMAD1	Oogonia_STRA8	0.645231	0.0745155	0.924115	0.0908733	Oogonia_meiotic	1.54745	2.39829	0
LIN28A	Oogonia_STRA8	0.450867	0.0223013	0.668142	0.0345849	PGC	1.51687	3.36434	0
TFAP2C	Oogonia_STRA8	0.384393	0.0091039	0.557522	0.0198604	PGC	1.50645	3.91903	0
SYCE1	Oogonia_STRA8	0.590318	0.0654969	0.88027	0.0805393	Oogonia_meiotic	1.48702	2.51901	0
CALCOCO2	Oogonia_STRA8	0.360549	0.00605505	0.473451	0.0162155	PGC	1.48611	4.12178	0
STAG3	Oogonia_STRA8	0.586705	0.0646867	0.75253	0.0796488	Oogonia_meiotic	1.48444	2.53013	0
PORCN	Oogonia_STRA8	0.461705	0.0277168	0.564159	0.0401557	PGC	1.48438	3.21499	0
EPCAM	Oogonia_STRA8	0.793353	0.139479	0.929204	0.158221	PGC	1.46276	1.84376	0
AP3B2	Oogonia_STRA8	0.421965	0.02002	0.721239	0.0315406	PGC	1.45851	3.45648	0
MOV10L1	Oogonia_STRA8	0.572977	0.0648786	0.850337	0.0794417	Oogonia_meiotic	1.4512	2.53273	0
C14orf39	Oogonia_STRA8	0.776012	0.136388	0.971332	0.154721	Oogonia_meiotic	1.44814	1.86613	0
UBE2T	Oogonia_STRA8	0.814306	0.15031	0.933628	0.169342	PGC	1.44608	1.77584	0
CPEB1	Oogonia_STRA8	0.554913	0.0600814	0.765599	0.0742643	Oogonia_meiotic	1.44284	2.60012	0
REC114	Oogonia_STRA8	0.596098	0.0739185	0.778761	0.0888852	PGC	1.4428	2.42041	0
ASZ1	Oogonia_STRA8	0.516618	0.0500181	0.706998	0.0633918	Oogonia_meiotic	1.42505	2.75842	0
NR6A1	Oogonia_STRA8	0.546965	0.060188	0.730088	0.07414	PGC	1.42309	2.6018	0
PLCG2	Oogonia_STRA8	0.435694	0.0264375	0.696903	0.0381676	PGC	1.42287	3.26577	0
ZCWPW1	Oogonia_STRA8	0.848266	0.170224	0.966695	0.189658	Oogonia_meiotic	1.41027	1.66253	0
DMRT1	Oogonia_STRA8	0.400289	0.0188261	0.526549	0.0297596	PGC	1.40686	3.5146	0
MSX2	Oogonia_STRA8	0.471098	0.0383344	0.595133	0.0507383	PGC	1.40438	2.98107	0
ESCO2	Oogonia_STRA8	0.859827	0.177494	0.957965	0.197051	PGC	1.39661	1.62429	0
SPTBN2	Oogonia_STRA8	0.405347	0.0208729	0.577434	0.0318926	PGC	1.39657	3.44538	0
PCGF5	Oogonia_STRA8	0.705925	0.123425	0.869469	0.140121	PGC	1.38732	1.96525	0
SIAH1	Oogonia_STRA8	0.830202	0.169691	0.935841	0.188622	PGC	1.38479	1.66801	0
RBM46	Oogonia_STRA8	0.71315	0.127305	0.827434	0.144097	PGC	1.38156	1.93727	0
IGFBPL1	Oogonia_STRA8	0.372832	0.0151376	0.581858	0.0253899	PGC	1.36956	3.67341	0
TRIM71	Oogonia_STRA8	0.461705	0.0426199	0.70354	0.0546317	PGC	1.34224	2.90714	0
TAF5	Oogonia_STRA8	0.741329	0.146707	0.89823	0.16375	PGC	1.34137	1.80941	0
TDRKH	Oogonia_STRA8	0.567919	0.0817432	0.804806	0.0956779	Oogonia_meiotic	1.33277	2.34677	0
GATA2	Oogonia_STRA8	0.555636	0.0772658	0.577434	0.0909769	PGC	1.33194	2.39715	0
M1AP	Oogonia_STRA8	0.511561	0.0611901	0.682546	0.0740986	Oogonia_meiotic	1.33126	2.60236	0
ENDOG	Oogonia_STRA8	0.669075	0.12415	0.820796	0.139768	PGC	1.31658	1.96777	0
GLDC	Oogonia_STRA8	0.38078	0.021683	0.603982	0.0319755	PGC	1.31095	3.44279	0
CDX2	Oogonia_STRA8	0.341763	0.0121741	0.449726	0.0216207	Epithelial	1.31035	3.8341	0
C6orf136	Oogonia_STRA8	0.690029	0.134298	0.852445	0.150227	Oogonia_meiotic	1.30803	1.89561	0
KLF5	Oogonia_STRA8	0.577312	0.0901435	0.778761	0.104107	PGC	1.30608	2.26234	0
DPPA2	Oogonia_STRA8	0.315751	0.00750485	0.544248	0.0163398	PGC	1.29905	4.11415	0
CRIP1	Oogonia_STRA8	0.809249	0.185063	0.882743	0.202953	PGC	1.29057	1.59478	0
SLC22A18	Oogonia_STRA8	0.34104	0.0134107	0.446903	0.0228012	PGC	1.28945	3.78094	0
CPNE5	Oogonia_STRA8	0.597543	0.101358	0.727876	0.11558	PGC	1.28938	2.15779	0
GPAT2	Oogonia_STRA8	0.468931	0.054133	0.783727	0.0660219	Oogonia_meiotic	1.27444	2.71777	0
TCL1A	Oogonia_STRA8	0.345376	0.0156706	0.579646	0.0251206	PGC	1.27239	3.68407	0
TEX101	Oogonia_STRA8	0.507225	0.0690787	0.925801	0.0816369	Oogonia_meiotic	1.27084	2.50547	0
CCNB2	Oogonia_STRA8	0.929913	0.237874	0.993363	0.257709	PGC	1.26089	1.35592	0
LRRC34	Oogonia_STRA8	0.407514	0.0347952	0.599558	0.0454781	PGC	1.25943	3.09052	0
FBXO6	Oogonia_STRA8	0.526734	0.079803	0.606195	0.0926129	PGC	1.25327	2.37933	0
CITED1	Oogonia_STRA8	0.584538	0.104833	0.784148	0.118583	Oogonia_meiotic	1.24632	2.13215	0
FMR1NB	Oogonia_STRA8	0.46604	0.0598682	0.852024	0.0715099	Oogonia_meiotic	1.22938	2.63792	0
MAGEB16	Oogonia_STRA8	0.383671	0.0309788	0.526549	0.0410877	PGC	1.22469	3.19205	0
CKB	Oogonia_STRA8	0.758671	0.182781	0.95354	0.199288	PGC	1.22374	1.61301	0
POLD1	Oogonia_STRA8	0.689306	0.155854	0.887168	0.171143	PGC	1.2168	1.76525	0
CAD	Oogonia_STRA8	0.587428	0.112935	0.823009	0.126535	PGC	1.21435	2.06724	0
WFDC2	Oogonia_STRA8	0.469653	0.0644095	0.731261	0.0760246	Epithelial	1.21015	2.5767	0
FAM169A	Oogonia_STRA8	0.437139	0.0523207	0.652655	0.0633504	PGC	1.2061	2.75907	0
MYBL2	Oogonia_STRA8	0.515173	0.0857728	0.818584	0.0980802	PGC	1.19622	2.32197	0
SYT5	Oogonia_STRA8	0.335983	0.0194657	0.513274	0.0285377	PGC	1.19493	3.55653	0
PTPN6	Oogonia_STRA8	0.394509	0.0389314	0.591675	0.049123	Macrophages	1.18882	3.01343	0
REC8	Oogonia_STRA8	0.66474	0.153231	0.59292	0.167892	PGC	1.18618	1.78443	0
ZFP42	Oogonia_STRA8	0.348266	0.0249664	0.60177	0.0342328	PGC	1.17525	3.37457	0
RAD51	Oogonia_STRA8	0.705925	0.183357	0.931416	0.198335	PGC	1.14204	1.6178	0
HCCS	Oogonia_STRA8	0.760116	0.207321	0.858769	0.223166	Oogonia_meiotic	1.14005	1.49984	0
CENPM	Oogonia_STRA8	0.771676	0.212502	0.942478	0.228529	PGC	1.13906	1.47609	0
LARP1B	Oogonia_STRA8	0.577312	0.128179	0.839376	0.141052	Oogonia_meiotic	1.13074	1.95862	0
SPATA5	Oogonia_STRA8	0.653902	0.163998	0.88027	0.17804	Oogonia_meiotic	1.12847	1.72575	0
MEIOC	Oogonia_STRA8	0.406069	0.0521502	0.725126	0.0622942	Oogonia_meiotic	1.1272	2.77589	9.09731e-314
SYCE3	Oogonia_STRA8	0.455925	0.0740678	0.9043	0.0850125	Oogonia_meiotic	1.12383	2.46496	6.27654e-307
CENPF	Oogonia_STRA8	0.887283	0.263992	0.977876	0.281856	PGC	1.12362	1.26636	0
TEX101	Oogonia_meiotic	0.925801	0.0380268	0.507225	0.0816369	Oogonia_STRA8	2.31957	2.50547	0
TEX12	Oogonia_meiotic	0.958685	0.0477622	0.677746	0.0925094	Oogonia_STRA8	2.2821	2.38045	0
FMR1NB	Oogonia_meiotic	0.852024	0.0311881	0.524336	0.0715099	PGC	2.24757	2.63792	0
SYCE3	Oogonia_meiotic	0.9043	0.0426876	0.59292	0.0850125	PGC	2.22906	2.46496	0
SLC25A31	Oogonia_meiotic	0.952782	0.0529892	0.778761	0.0971897	PGC	2.22102	2.33109	0
SYCE1	Oogonia_meiotic	0.88027	0.0392247	0.701327	0.0805393	PGC	2.21741	2.51901	0
HORMAD1	Oogonia_meiotic	0.924115	0.0478275	0.74115	0.0908733	PGC	2.21629	2.39829	0
MAEL	Oogonia_meiotic	0.948567	0.0531635	0.747788	0.0971483	PGC	2.2116	2.33152	0
MOV10L1	Oogonia_meiotic	0.850337	0.0396167	0.734513	0.0794417	PGC	2.15368	2.53273	0
STK31	Oogonia_meiotic	0.98145	0.068213	0.933628	0.113074	PGC	2.13928	2.17971	0
SYCP2	Oogonia_meiotic	0.734823	0.0193401	0.134956	0.0544867	PGC	2.13819	2.9098	0
GPAT2	Oogonia_meiotic	0.783727	0.0289448	0.579646	0.0660219	PGC	2.12999	2.71777	0
BX276092.9	Oogonia_meiotic	0.736931	0.0213656	0.409292	0.0565162	PGC	2.11737	2.87323	0
DMRTC2	Oogonia_meiotic	0.660202	0.00962648	0.126106	0.0415847	PGC	2.09946	3.18002	0
TEX11	Oogonia_meiotic	0.692664	0.0159425	0.227876	0.0491851	PGC	2.08642	3.01216	0
HSF2BP	Oogonia_meiotic	0.796796	0.0356746	0.70354	0.0730631	PGC	2.08476	2.61643	0
TERB1	Oogonia_meiotic	0.674958	0.013133	0.110619	0.0456438	PGC	2.08352	3.08689	0
FIGLA	Oogonia_meiotic	0.758432	0.028335	0.15708	0.0641995	PGC	2.08247	2.74576	0
DDX4	Oogonia_meiotic	0.889966	0.0568224	0.924779	0.0977489	PGC	2.06949	2.32535	0
MAP7D2	Oogonia_meiotic	0.951096	0.0716759	0.940265	0.114876	PGC	2.05808	2.16391	0
SYCP1	Oogonia_meiotic	0.990725	0.0834368	0.773844	0.128005	Oogonia_STRA8	2.03662	2.05568	0
SPDYA	Oogonia_meiotic	0.667791	0.016487	0.12211	0.048481	Oogonia_STRA8	2.02113	3.02658	0
RNF17	Oogonia_meiotic	0.829258	0.049156	0.80531	0.087477	PGC	2.02039	2.43638	0
FKBP6	Oogonia_meiotic	0.956577	0.0782315	0.942478	0.121378	PGC	2.01727	2.10884	0
MEIOC	Oogonia_meiotic	0.725126	0.0280518	0.406069	0.0622942	Oogonia_STRA8	2.01287	2.77589	0
CPEB1	Oogonia_meiotic	0.765599	0.0385495	0.676991	0.0742643	PGC	1.99065	2.60012	0
CCDC172	Oogonia_meiotic	0.650084	0.0158772	0.323009	0.0470313	PGC	1.98727	3.05694	0
DAZ1	Oogonia_meiotic	0.993255	0.0931722	0.961705	0.137387	Oogonia_STRA8	1.97157	1.98495	0
ANKRD31	Oogonia_meiotic	0.606661	0.0101056	0.0818584	0.0394102	PGC	1.96178	3.23373	0
ASZ1	Oogonia_meiotic	0.706998	0.0301427	0.654867	0.0633918	PGC	1.9502	2.75842	0
STAG3	Oogonia_meiotic	0.75253	0.0448873	0.705752	0.0796488	PGC	1.904	2.53013	0
INCA1	Oogonia_meiotic	0.632799	0.0192747	0.108407	0.0494129	PGC	1.90317	3.00754	0
TDRKH	Oogonia_meiotic	0.804806	0.0590439	0.774336	0.0956779	PGC	1.88869	2.34677	0
C1orf146	Oogonia_meiotic	0.585582	0.0119569	0.170354	0.040135	PGC	1.88294	3.21551	0
RNF212	Oogonia_meiotic	0.56113	0.00860285	0.0951327	0.0357446	PGC	1.86932	3.33136	0
GTSF1	Oogonia_meiotic	0.623524	0.0204726	0.24115	0.0500963	PGC	1.86671	2.99381	0
HFM1	Oogonia_meiotic	0.655987	0.0281607	0.195809	0.0590014	Oogonia_STRA8	1.85657	2.83019	0
CCDC73	Oogonia_meiotic	0.824199	0.0706087	0.345133	0.107627	PGC	1.83721	2.22908	0
ZNF541	Oogonia_meiotic	0.533305	0.00635958	0.0597345	0.0322447	PGC	1.83158	3.4344	0
TAF4B	Oogonia_meiotic	0.732293	0.0488729	0.568584	0.0824446	PGC	1.82753	2.49563	0
ELAVL2	Oogonia_meiotic	0.842327	0.076903	0.915929	0.114503	PGC	1.82545	2.16716	0
SMC1B	Oogonia_meiotic	0.999578	0.118349	0.955925	0.161638	Oogonia_STRA8	1.82163	1.8224	0
C14orf39	Oogonia_meiotic	0.971332	0.112534	0.792035	0.154721	PGC	1.81264	1.86613	0
RBMXL3	Oogonia_meiotic	0.657251	0.0334749	0.818584	0.0641166	PGC	1.8055	2.74705	0
GC	Oogonia_meiotic	0.528246	0.00784057	0.128319	0.0334044	PGC	1.79554	3.39907	0
C5orf47	Oogonia_meiotic	0.547639	0.0113906	0.114162	0.0377327	Oogonia_STRA8	1.79474	3.27723	0
SCML2	Oogonia_meiotic	0.679174	0.0405968	0.438053	0.0719655	PGC	1.78729	2.63157	0
MEIOB	Oogonia_meiotic	0.52403	0.0077099	0.0464602	0.0330731	PGC	1.78644	3.40904	0
TEX15	Oogonia_meiotic	0.940556	0.109659	0.568584	0.150475	PGC	1.78137	1.89396	0
PIWIL2	Oogonia_meiotic	0.608347	0.0249156	0.524336	0.0535755	PGC	1.78043	2.92666	0
PRDM7	Oogonia_meiotic	0.560287	0.0151367	0.0840708	0.041916	PGC	1.77728	3.17209	0
M1AP	Oogonia_meiotic	0.682546	0.0426658	0.553097	0.0740986	PGC	1.77623	2.60236	0
SPO11	Oogonia_meiotic	0.517285	0.00740499	0.0884956	0.0324518	PGC	1.77325	3.428	0
TKTL1	Oogonia_meiotic	0.512226	0.00714363	0.090708	0.0319548	PGC	1.76382	3.44343	0
TOPAZ1	Oogonia_meiotic	0.521079	0.00890776	0.141593	0.0340671	PGC	1.76095	3.37942	0
RNF212B	Oogonia_meiotic	0.575042	0.0198846	0.418142	0.0471555	PGC	1.75635	3.0543	0
CCNB3	Oogonia_meiotic	0.50801	0.00906022	0.0433483	0.0335701	lowQC	1.72425	3.39412	0
ATF7IP2	Oogonia_meiotic	0.563238	0.0220407	0.225664	0.0486259	PGC	1.703	3.0236	0
DOCK3	Oogonia_meiotic	0.496206	0.00879887	0.137168	0.0327417	PGC	1.69658	3.4191	0
BEND2	Oogonia_meiotic	0.490304	0.00805837	0.133671	0.0317477	Oogonia_STRA8	1.69152	3.44994	0
DMC1	Oogonia_meiotic	0.60371	0.0326691	0.347345	0.0607203	PGC	1.69128	2.80148	0
TEX14	Oogonia_meiotic	0.75801	0.0738756	0.814159	0.107482	PGC	1.69069	2.23043	0
CITED1	Oogonia_meiotic	0.784148	0.0841991	0.584538	0.118583	Oogonia_STRA8	1.67192	2.13215	0
RHOXF1	Oogonia_meiotic	0.476813	0.00731787	0.143805	0.0303808	PGC	1.66596	3.49394	0
YBX2	Oogonia_meiotic	0.59317	0.0336056	0.466814	0.061093	PGC	1.65812	2.79536	0
CCDC181	Oogonia_meiotic	0.741568	0.0750953	0.34292	0.107834	PGC	1.65159	2.22716	0
LARP1B	Oogonia_meiotic	0.839376	0.104977	0.69469	0.141052	PGC	1.64402	1.95862	0
MAGEB2	Oogonia_meiotic	0.491147	0.0118262	0.216814	0.0353718	PGC	1.64133	3.34184	0
UGT8	Oogonia_meiotic	0.502108	0.0141348	0.161127	0.0381055	Oogonia_STRA8	1.64059	3.2674	0
C6orf136	Oogonia_meiotic	0.852445	0.11395	0.847345	0.150227	PGC	1.6159	1.89561	0
ZCWPW1	Oogonia_meiotic	0.966695	0.149515	0.929204	0.189658	PGC	1.60716	1.66253	0
ADAD1	Oogonia_meiotic	0.443086	0.00581509	0.0597345	0.0272951	PGC	1.59557	3.60105	0
TSBP1	Oogonia_meiotic	0.475126	0.0123925	0.0346821	0.0351233	Oogonia_STRA8	1.59115	3.34889	0
JADE3	Oogonia_meiotic	0.748314	0.0883807	0.643805	0.120799	PGC	1.58166	2.11363	0
DDX25	Oogonia_meiotic	0.638702	0.0561472	0.442478	0.084764	PGC	1.57624	2.46788	0
RBM46	Oogonia_meiotic	0.810287	0.109681	0.827434	0.144097	PGC	1.56974	1.93727	0
ADARB1	Oogonia_meiotic	0.592749	0.0439726	0.373894	0.0709301	PGC	1.56845	2.64606	0
TCFL5	Oogonia_meiotic	0.48398	0.016291	0.316372	0.0392652	PGC	1.56684	3.23742	0
SYNGR4	Oogonia_meiotic	0.471332	0.0140913	0.236726	0.0365523	PGC	1.55964	3.30901	0
CCNB1IP1	Oogonia_meiotic	0.622681	0.0538168	0.300578	0.0817611	Oogonia_STRA8	1.55916	2.50395	0
DPPA5	Oogonia_meiotic	0.686762	0.0743766	0.980491	0.104459	Oogonia_STRA8	1.55137	2.25896	0
POU4F1	Oogonia_meiotic	0.465008	0.013917	0.276549	0.036076	PGC	1.54482	3.32213	0
PCGF5	Oogonia_meiotic	0.78457	0.106828	0.869469	0.140121	PGC	1.54188	1.96525	0
SPA17	Oogonia_meiotic	0.679595	0.0739845	0.446903	0.103734	PGC	1.53991	2.26593	0
LYPD4	Oogonia_meiotic	0.408516	0.00350648	0.0303468	0.0234017	Oogonia_STRA8	1.53396	3.75494	0
RBM44	Oogonia_meiotic	0.490725	0.0210171	0.530973	0.0440905	PGC	1.5318	3.12151	0
CCDC152	Oogonia_meiotic	0.492411	0.0217794	0.272124	0.0448982	PGC	1.52813	3.10336	0
SPATA5	Oogonia_meiotic	0.88027	0.141762	0.840708	0.17804	PGC	1.51912	1.72575	0
TUBA3D	Oogonia_meiotic	0.556492	0.0409017	0.853982	0.066229	PGC	1.51067	2.71464	0
RIBC1	Oogonia_meiotic	0.488617	0.023391	0.272124	0.0462443	PGC	1.50192	3.07382	0
HORMAD2	Oogonia_meiotic	0.460371	0.0170315	0.303097	0.0388096	PGC	1.49579	3.24909	0
FBXO47	Oogonia_meiotic	0.425379	0.00986606	0.0973451	0.0302773	PGC	1.4877	3.49736	0
ESCO2	Oogonia_meiotic	0.915683	0.159926	0.957965	0.197051	PGC	1.48734	1.62429	0
REC114	Oogonia_meiotic	0.612142	0.0618534	0.778761	0.0888852	PGC	1.48163	2.42041	0
MAJIN	Oogonia_meiotic	0.387437	0.00394207	0.0752212	0.0227805	PGC	1.46523	3.78185	0
CECR2	Oogonia_meiotic	0.69941	0.0934989	0.690265	0.123263	PGC	1.46417	2.09344	0
EFCAB2	Oogonia_meiotic	0.655143	0.0800828	0.44469	0.108331	PGC	1.4561	2.22256	0
NR6A1	Oogonia_meiotic	0.558179	0.0491343	0.730088	0.07414	PGC	1.45227	2.6018	0
UBE2T	Oogonia_meiotic	0.816189	0.135925	0.933628	0.169342	PGC	1.44942	1.77584	0
ASPA	Oogonia_meiotic	0.403879	0.00836328	0.0168484	0.0277922	Macrophages	1.4471	3.583	0
FST	Supporting	0.836899	0.103327	0.256306	0.31495	Mesothelial	0.966903	1.15534	0
HMGCS2	Supporting	0.722182	0.0761708	0.190283	0.262534	Mesothelial	0.965827	1.33737	0
WNT6	Supporting	0.884135	0.130541	0.574899	0.34794	Mesothelial	0.933402	1.05572	0
AMHR2	Supporting	0.873726	0.137556	0.699782	0.349929	Mesothelial	0.917435	1.05003	0
CGN	Supporting	0.613855	0.0807987	0.415135	0.234577	Mesothelial	0.890073	1.44997	0
PRCD	Supporting	0.657143	0.0987281	0.454064	0.259821	Mesothelial	0.885671	1.34776	0
CLU	Supporting	0.805887	0.142475	0.341865	0.333858	Epithelial	0.884089	1.09704	0
CST8	Supporting	0.553769	0.0618506	0.354095	0.203761	Mesothelial	0.88094	1.59081	0
SMPX	Supporting	0.504738	0.0507611	0.321707	0.181726	Mesothelial	0.860707	1.70526	0
INHA	Supporting	0.525485	0.0667986	0.178449	0.199122	Mesothelial	0.848047	1.61384	0
GATM	Supporting	0.72893	0.146142	0.311199	0.314267	Macrophages	0.843746	1.15751	0
ALDH1B1	Supporting	0.517444	0.0681957	0.206789	0.197797	Mesothelial	0.838527	1.62052	0
IRX3	Supporting	0.614788	0.114242	0.457565	0.258641	Endothelial	0.831387	1.35231	0
ETNK2	Supporting	0.570567	0.0968944	0.345998	0.233541	Mesothelial	0.829831	1.4544	0
FNDC5	Supporting	0.612419	0.116104	0.153157	0.259283	Mesenchymal	0.826665	1.34984	0
FOXL2	Supporting	0.570567	0.101348	0.158726	0.23671	Mesenchymal	0.822142	1.44092	0
RUNX1	Supporting	0.649677	0.135547	0.428527	0.283865	Mesothelial	0.818109	1.25926	0
SH2D4A	Supporting	0.488801	0.0732893	0.394581	0.193158	Mesothelial	0.803711	1.64425	0
ITGA6	Supporting	0.867767	0.210321	0.760148	0.399983	Endothelial	0.795163	0.916332	0
NRN1	Supporting	0.512635	0.0979713	0.41389	0.217595	Mesothelial	0.78183	1.52512	0
AARD	Supporting	0.529433	0.106441	0.338496	0.228467	PGC	0.781635	1.47636	0
PANK1	Supporting	0.674515	0.169572	0.39863	0.31524	Mesothelial	0.778675	1.15442	0
BST2	Supporting	0.765039	0.199261	0.865044	0.362479	PGC	0.776354	1.01479	0
DCAF12L2	Supporting	0.615363	0.153913	0.517284	0.287034	Mesothelial	0.768068	1.24816	0
ADGRG1	Supporting	0.429146	0.0641791	0.235832	0.169466	Epithelial	0.761778	1.7751	0
SORBS2	Supporting	0.695908	0.188986	0.519776	0.335225	Mesothelial	0.760596	1.09295	0
KITLG	Supporting	0.885858	0.236866	0.701107	0.424089	Endothelial	0.759899	0.857811	0
PCSK6	Supporting	0.466403	0.0874058	0.168142	0.19674	PGC	0.758312	1.62587	0
RNF213	Supporting	0.551974	0.135023	0.552164	0.255307	Mesothelial	0.753604	1.36529	0
KLHL23	Supporting	0.767408	0.217307	0.476487	0.376002	Mesothelial	0.750649	0.978161	0
KANK3	Supporting	0.526059	0.125273	0.712177	0.240893	Endothelial	0.748793	1.4234	0
SDC4	Supporting	0.798636	0.226912	0.691042	0.391845	Epithelial	0.748234	0.93689	0
CDKN1B	Supporting	0.719598	0.205984	0.366241	0.354153	Mesothelial	0.746961	1.03803	0
ESPN	Supporting	0.483058	0.104957	0.528761	0.214033	PGC	0.744695	1.54163	0
CNTN4	Supporting	0.387509	0.0494222	0.0710059	0.146955	Mesothelial	0.743099	1.91763	0
TLE2	Supporting	0.421752	0.0703787	0.199626	0.171744	Mesothelial	0.743021	1.76175	0
GSTM2	Supporting	0.45219	0.0902582	0.190128	0.194669	Epithelial	0.739987	1.63645	0
TST	Supporting	0.792319	0.23151	0.646018	0.393294	PGC	0.73939	0.933197	0
CITED4	Supporting	0.454917	0.098437	0.437521	0.201276	Erythroid	0.729269	1.60308	0
ITPR2	Supporting	0.479182	0.113601	0.450185	0.219065	Endothelial	0.727583	1.51839	0
KLF4	Supporting	0.566188	0.160055	0.426199	0.277217	Endothelial	0.726393	1.28295	0
METTL24	Supporting	0.357574	0.0393806	0.0719557	0.131174	Endothelial	0.726314	2.03123	0
RND2	Supporting	0.393467	0.0628693	0.214602	0.158241	PGC	0.72541	1.84363	0
LRRN1	Supporting	0.411127	0.0742789	0.278729	0.171454	Mesothelial	0.724998	1.76344	0
GREB1	Supporting	0.430653	0.0870856	0.308958	0.186199	Epithelial	0.723902	1.68094	0
CPE	Supporting	0.732233	0.226853	0.629399	0.372647	Mesothelial	0.722804	0.987124	0
GPC4	Supporting	0.491027	0.123439	0.200872	0.229482	Mesothelial	0.722757	1.47193	0
HS3ST1	Supporting	0.346949	0.0354222	0.215867	0.125293	Endothelial	0.720649	2.0771	0
GNG13	Supporting	0.563029	0.162732	0.730088	0.278212	PGC	0.720325	1.27937	0
SMPDL3B	Supporting	0.391242	0.0648194	0.311429	0.158987	Mesothelial	0.719468	1.83893	0
REEP1	Supporting	0.52893	0.146695	0.503893	0.256964	Mesothelial	0.718722	1.35882	0
CRYL1	Supporting	0.489591	0.126641	0.501401	0.231346	Mesothelial	0.716683	1.46384	0
ENPP2	Supporting	0.424408	0.0879006	0.312052	0.184977	Mesothelial	0.716197	1.68752	0
DDIT4L	Supporting	0.435319	0.0952935	0.191841	0.193385	Mesothelial	0.71526	1.64307	0
FOSB	Supporting	0.610553	0.188375	0.435067	0.310166	Mesothelial	0.714742	1.17065	0
CIB2	Supporting	0.551328	0.161626	0.484896	0.274049	Mesothelial	0.713666	1.29445	0
BHLHE41	Supporting	0.34336	0.0385365	0.141231	0.126473	Oogonia_meiotic	0.709974	2.06773	0
SPINT2	Supporting	0.660589	0.212388	0.903108	0.341686	Epithelial	0.709381	1.07386	0
PLA2G1B	Supporting	0.309763	0.0167651	0.126143	0.10129	Epithelial	0.709285	2.28977	0
GXYLT2	Supporting	0.555133	0.167448	0.601682	0.279288	Mesothelial	0.708078	1.27551	0
KCTD14	Supporting	0.986935	0.287569	0.599502	0.489324	Mesothelial	0.705392	0.71473	0
GATA4	Supporting	0.616511	0.198708	0.536282	0.319237	Mesothelial	0.703946	1.14182	0
HPCAL1	Supporting	0.679397	0.225136	0.47786	0.356183	Endothelial	0.701349	1.03231	0
STIM1	Supporting	0.536181	0.162587	0.48398	0.270363	Oogonia_meiotic	0.70132	1.30799	0
RSPO1	Supporting	0.522613	0.155951	0.656182	0.261727	Mesothelial	0.700539	1.34045	0
CDC42EP5	Supporting	0.699785	0.234159	0.390221	0.368484	Mesothelial	0.698635	0.998357	0
KRT8	Supporting	0.49519	0.143552	0.893967	0.244993	Epithelial	0.696497	1.40652	0
RYR2	Supporting	0.344939	0.0503536	0.168483	0.135337	Mesothelial	0.689875	1.99999	0
ACSBG1	Supporting	0.324408	0.0366155	0.221426	0.119639	Mesothelial	0.688808	2.12328	0
CD151	Supporting	0.611989	0.208225	0.678967	0.324704	Endothelial	0.688389	1.12484	0
NAV2	Supporting	0.623977	0.214105	0.628885	0.332346	Epithelial	0.687359	1.10158	0
LPL	Supporting	0.526131	0.167331	0.479601	0.270839	Mesothelial	0.687248	1.30623	0
PODXL	Supporting	0.443431	0.119568	0.728745	0.212997	Mesothelial	0.685756	1.54648	0
HSPB1	Supporting	0.716296	0.251361	0.679228	0.385487	Mesothelial	0.682808	0.953248	0
ME1	Supporting	0.467911	0.137672	0.426036	0.232941	Mesothelial	0.681733	1.45697	0
TDRP	Supporting	0.416152	0.104433	0.429461	0.194359	Mesothelial	0.681678	1.63805	0
ADAMTS16	Supporting	0.307681	0.0292517	0.0786106	0.109574	Epithelial	0.680331	2.21116	0
TLE6	Supporting	0.365973	0.0724452	0.269912	0.157123	PGC	0.677315	1.85073	0
SFXN3	Supporting	0.378679	0.0814972	0.262224	0.167229	Mesothelial	0.677226	1.78839	0
TMEM86A	Supporting	0.509261	0.165381	0.276238	0.264585	Mesothelial	0.67711	1.32959	0
GAS6	Supporting	0.895549	0.297116	0.52289	0.469754	Mesothelial	0.676629	0.755547	0
EMX2	Supporting	0.596985	0.210496	0.672688	0.321991	Mesothelial	0.676521	1.13323	0
GAMT	Supporting	0.578464	0.20418	0.513274	0.312154	PGC	0.673481	1.16426	0
SUSD3	Supporting	0.285212	0.0186861	0.171457	0.0955744	Macrophages	0.669635	2.34785	0
PCBD1	Supporting	0.395262	0.0985825	0.702011	0.18417	Epithelial	0.668743	1.6919	0
SAT2	Supporting	0.406604	0.106907	0.248521	0.193365	Mesothelial	0.668123	1.64318	0
CD200	Supporting	0.457861	0.141747	0.568266	0.232941	Endothelial	0.66709	1.45697	0
APOC1	Supporting	0.428356	0.122537	0.641593	0.210761	PGC	0.666964	1.55703	0
STK39	Supporting	0.587724	0.213959	0.413578	0.321784	Mesothelial	0.666405	1.13387	0
WFDC1	Supporting	0.301077	0.0317548	0.181875	0.10945	Mesothelial	0.666069	2.21229	0
SYTL4	Supporting	0.316368	0.0438339	0.111492	0.122455	Mesothelial	0.664375	2.10001	0
TTYH2	Supporting	0.350538	0.0695637	0.159292	0.15062	PGC	0.663567	1.89299	0
RPP25	Supporting	0.466691	0.150362	0.518219	0.241618	Mesothelial	0.662886	1.4204	0
ATP1B2	Supporting	0.40682	0.112	0.228278	0.197051	Mesothelial	0.660795	1.62429	0
MID1IP1	Supporting	0.477172	0.159182	0.340037	0.250916	Epithelial	0.659754	1.38264	0
PDE1A	Supporting	0.420029	0.121897	0.186573	0.207903	Mesenchymal	0.659733	1.57068	0
SPCS3	Supporting	0.656999	0.248828	0.427788	0.366579	Epithelial	0.659326	1.00354	0
TRIM7	Supporting	0.298134	0.0336176	0.159763	0.109926	Mesothelial	0.658263	2.20795	0
CTNNAL1	Supporting	0.413209	0.120034	0.389397	0.20461	Epithelial	0.655618	1.58665	0
SULF1	Supporting	0.558435	0.20872	0.638119	0.309607	Mesothelial	0.654738	1.17245	0
UPK3B	Mesothelial	0.798194	0.0297941	0.0511883	0.0808913	Epithelial	2.00718	2.51465	0
TM4SF5	Mesothelial	0.635628	0.0143092	0.0486726	0.0556257	PGC	1.8364	2.88911	0
KRT7	Mesothelial	0.661476	0.0547298	0.446069	0.0950774	Epithelial	1.5565	2.35306	0
KRT19	Mesothelial	0.669885	0.0579022	0.431444	0.098598	Epithelial	1.55193	2.3167	0
UPK1B	Mesothelial	0.41389	0.0117801	0.0153625	0.0385197	Supporting	1.34787	3.25659	0
STK26	Mesothelial	0.593273	0.0724776	0.226691	0.10711	Epithelial	1.32531	2.2339	0
TMEM151A	Mesothelial	0.450016	0.0278641	0.119469	0.0559364	PGC	1.29764	2.88354	0
TMEM108	Mesothelial	0.554344	0.0667096	0.265487	0.0991364	PGC	1.28123	2.31126	0
MYRF	Mesothelial	0.526004	0.0764265	0.173675	0.106323	Epithelial	1.17892	2.24128	0
ILDR2	Mesothelial	0.444721	0.0443695	0.100359	0.0709922	Supporting	1.17637	2.64519	0
BCAM	Mesothelial	0.677671	0.145088	0.491773	0.180504	Epithelial	1.16017	1.712	0
CFAP161	Mesothelial	0.395204	0.0293948	0.0768126	0.0537205	Supporting	1.15556	2.92396	0
PODXL	Mesothelial	0.728745	0.176258	0.498155	0.212997	Endothelial	1.12699	1.54648	0
ALDH1A2	Mesothelial	0.769542	0.222158	0.412778	0.258558	Supporting	1.04091	1.35263	0
TNNI1	Mesothelial	0.670819	0.181139	0.3972	0.213701	Supporting	1.03519	1.54318	0
KRT18	Mesothelial	0.828402	0.25122	0.915905	0.289602	Epithelial	1.0266	1.23925	0
FLNC	Mesothelial	0.519153	0.11434	0.205642	0.14126	Mesenchymal	1.01606	1.95716	0
KRT8	Mesothelial	0.704453	0.212264	0.893967	0.244993	Epithelial	0.99083	1.40652	0
CRB2	Mesothelial	0.312052	0.0228947	0.0526981	0.0421231	Oogonia_meiotic	0.988319	3.16716	0
BNC1	Mesothelial	0.35067	0.0394667	0.262226	0.0601611	Oogonia_meiotic	0.985637	2.81073	0
MUC16	Mesothelial	0.247275	0.00266217	0.0132743	0.0189285	PGC	0.980961	3.96709	0
LHX9	Mesothelial	0.736531	0.234182	0.489663	0.267588	Supporting	0.970975	1.31831	0
LRRN4	Mesothelial	0.297415	0.0198554	0.24115	0.0383126	PGC	0.970161	3.26198	0
LSR	Mesothelial	0.555902	0.152764	0.561243	0.179572	Epithelial	0.954582	1.71718	0
FAH	Mesothelial	0.288695	0.0205653	0.0417085	0.0383954	Supporting	0.941093	3.25982	0
APLP1	Mesothelial	0.389287	0.0689724	0.380531	0.0902727	PGC	0.936204	2.40492	0
ANO1	Mesothelial	0.445033	0.104512	0.22491	0.127156	Supporting	0.917808	2.06234	0
IGFBP2	Mesothelial	0.892557	0.320126	0.8117	0.358192	Epithelial	0.916377	1.02669	0
RNF128	Mesothelial	0.489256	0.13282	0.546618	0.156522	Epithelial	0.907352	1.85456	0
FRMD4B	Mesothelial	0.688882	0.23893	0.575646	0.268851	Endothelial	0.904914	1.3136	0
ATF3	Mesothelial	0.600436	0.197023	0.49262	0.223849	Endothelial	0.898723	1.49678	0
EZR	Mesothelial	0.61881	0.208182	0.824497	0.235488	Epithelial	0.894859	1.4461	0
CXADR	Mesothelial	0.44005	0.109326	0.627057	0.131319	Epithelial	0.893357	2.03013	0
RSPO1	Mesothelial	0.656182	0.233628	0.522613	0.261727	Supporting	0.879582	1.34045	0
FREM2	Mesothelial	0.314855	0.0439036	0.361974	0.0619214	Epithelial	0.875892	2.78189	0
IRF5	Mesothelial	0.282155	0.028818	0.195243	0.0456645	Macrophages	0.870853	3.08643	0
NAAA	Mesothelial	0.476176	0.140607	0.307681	0.162922	Supporting	0.864014	1.81449	0
CDH3	Mesothelial	0.362504	0.0736756	0.372943	0.0928821	Epithelial	0.861463	2.37642	0
TMEM98	Mesothelial	0.606353	0.21659	0.464351	0.242508	Epithelial	0.859032	1.41672	0
HOXD9	Mesothelial	0.525693	0.173108	0.300926	0.196554	Mesenchymal	0.855207	1.62682	0
OOEP	Mesothelial	0.318904	0.051513	0.513274	0.069294	PGC	0.851281	2.6694	0
PLXNA4	Mesothelial	0.452196	0.134861	0.253123	0.155963	Supporting	0.84024	1.85813	0
SOX6	Mesothelial	0.358767	0.0807525	0.45133	0.09924	Erythroid	0.828828	2.31021	0
SEMA3A	Mesothelial	0.371847	0.0890496	0.14135	0.107855	Supporting	0.82809	2.22697	0
F11R	Mesothelial	0.54251	0.195004	0.667276	0.218113	Epithelial	0.826104	1.52274	0
SV2A	Mesothelial	0.270321	0.0313249	0.0500636	0.0472177	Mesenchymal	0.825286	3.05299	0
SEMA3C	Mesothelial	0.448458	0.138655	0.694698	0.159256	Epithelial	0.823926	1.83724	0
SP5	Mesothelial	0.425413	0.124168	0.315937	0.1442	Supporting	0.823834	1.93655	0
LGR5	Mesothelial	0.38119	0.0967699	0.267193	0.115683	Supporting	0.822188	2.1569	0
CAV1	Mesothelial	0.35939	0.083215	0.774908	0.10158	Endothelial	0.821891	2.28691	0
GADD45B	Mesothelial	0.575833	0.217078	0.60177	0.240934	PGC	0.819543	1.42323	0
SLC9A3R1	Mesothelial	0.465587	0.151677	0.840708	0.172552	PGC	0.818064	1.75706	0
LYPD6	Mesothelial	0.365618	0.0888278	0.312614	0.107234	Epithelial	0.816332	2.23274	0
ALCAM	Mesothelial	0.707568	0.28838	0.396913	0.316255	Supporting	0.814557	1.15121	0
DDIT4	Mesothelial	0.517596	0.186552	0.51107	0.208565	Endothelial	0.811333	1.5675	0
KDR	Mesothelial	0.331361	0.0696823	0.891144	0.0870835	Endothelial	0.808815	2.44089	0
PLAT	Mesothelial	0.528496	0.196779	0.291846	0.218837	Mesenchymal	0.80301	1.51943	0
ANO6	Mesothelial	0.617253	0.248381	0.446494	0.27291	Endothelial	0.801573	1.29861	0
CRIM1	Mesothelial	0.42479	0.13282	0.47786	0.152236	Endothelial	0.799593	1.88233	0
DCLK1	Mesothelial	0.645282	0.266128	0.527495	0.291341	Supporting	0.7958	1.23326	0
GABRA4	Mesothelial	0.439116	0.145177	0.278966	0.164723	Supporting	0.791939	1.80349	3.07013e-317
RASL11A	Mesothelial	0.59919	0.243433	0.474659	0.267091	Supporting	0.791032	1.32017	0
ARL4C	Mesothelial	0.414513	0.131001	0.771481	0.149854	Epithelial	0.786784	1.89809	3.60008e-312
BNC2	Mesothelial	0.521021	0.199907	0.382378	0.22126	Oogonia_meiotic	0.785917	1.50842	0
ZCCHC3	Mesothelial	0.758642	0.327957	0.526549	0.356597	PGC	0.782273	1.03115	0
LOXL2	Mesothelial	0.476799	0.17526	0.342091	0.195311	Mesenchymal	0.778688	1.63316	2.52623e-305
EDN2	Mesothelial	0.267518	0.0406203	0.113209	0.0557086	Supporting	0.77249	2.88762	0
KCND2	Mesothelial	0.35503	0.0965702	0.224408	0.113757	Supporting	0.771723	2.17369	6.13474e-308
GXYLT2	Mesothelial	0.601682	0.256323	0.555133	0.279288	Supporting	0.767451	1.27551	0
IGFBP3	Mesothelial	0.398318	0.128184	0.623616	0.146147	Endothelial	0.766023	1.92314	9.10338e-290
AMOTL2	Mesothelial	0.618499	0.26655	0.531365	0.289954	Endothelial	0.765722	1.23803	0
IER3	Mesothelial	0.478979	0.183401	0.607011	0.203057	Endothelial	0.763621	1.59427	1.0754e-288
EMX2	Mesothelial	0.672688	0.297009	0.596985	0.321991	Supporting	0.76231	1.13323	0
BAIAP2L1	Mesothelial	0.303955	0.066044	0.181703	0.0818647	Oogonia_meiotic	0.760705	2.50269	0
DCTN6	Mesothelial	0.66895	0.2963	0.519393	0.32108	Oogonia_meiotic	0.759971	1.13606	0
ZFP57	Mesothelial	0.39863	0.132132	0.357934	0.149854	Endothelial	0.756637	1.89809	7.48287e-279
RNF213	Mesothelial	0.552164	0.23416	0.551974	0.255307	Supporting	0.753864	1.36529	4.16493e-300
PPP2R2B	Mesothelial	0.255372	0.0380247	0.109689	0.0524779	Epithelial	0.752675	2.94736	0
TGM2	Mesothelial	0.356587	0.104712	0.424354	0.121461	Endothelial	0.751742	2.10816	3.13081e-283
FABP5	Mesothelial	0.53815	0.226662	0.590494	0.247375	Epithelial	0.751715	1.39685	4.52138e-292
P3H4	Mesothelial	0.59483	0.261647	0.353048	0.283803	Mesenchymal	0.749174	1.25947	3.19599e-316
DOCK4	Mesothelial	0.548116	0.234138	0.636531	0.255017	Endothelial	0.74896	1.36643	5.46301e-293
SULF1	Mesothelial	0.638119	0.286206	0.558435	0.309607	Supporting	0.748163	1.17245	0
ITGA3	Mesothelial	0.244472	0.0331884	0.126143	0.0472384	Epithelial	0.746263	3.05255	0
CEBPB	Mesothelial	0.61445	0.274536	0.786918	0.29714	Macrophages	0.745667	1.21355	0
PDPN	Mesothelial	0.60355	0.268502	0.690029	0.290782	Oogonia_STRA8	0.745494	1.23518	3.1074e-317
EGFL6	Mesothelial	0.379321	0.123503	0.29117	0.140514	Supporting	0.744398	1.96245	3.23461e-268
PDGFC	Mesothelial	0.381813	0.126009	0.59415	0.14302	Epithelial	0.742538	1.94477	1.49235e-265
ST8SIA1	Mesothelial	0.292744	0.064003	0.133381	0.0792139	Supporting	0.742282	2.5356	1.0793e-306
TMEM132A	Mesothelial	0.420741	0.153829	0.471664	0.171578	Epithelial	0.741647	1.76272	5.47746e-260
MICAL2	Mesothelial	0.334164	0.0932869	0.232161	0.109305	Supporting	0.73971	2.21362	6.48493e-278
CAVIN3	Mesothelial	0.552787	0.242612	0.845018	0.263239	Endothelial	0.737802	1.33469	9.31984e-283
GPM6A	Mesothelial	0.184678	0.0066998	0.0830258	0.018535	Endothelial	0.736512	3.98809	0
RPP25	Mesothelial	0.518219	0.221914	0.466691	0.241618	Supporting	0.736077	1.4204	4.07356e-268
AMHR2	Mesothelial	0.699782	0.325007	0.873726	0.349929	Supporting	0.734789	1.05003	0
CRYL1	Mesothelial	0.501401	0.212108	0.489591	0.231346	Supporting	0.733972	1.46384	4.7571e-261
CRYAB	Mesothelial	0.313609	0.0811296	0.130093	0.0965891	Mesenchymal	0.732996	2.33729	1.35179e-280
MT1X	Mesothelial	0.428838	0.163369	0.676991	0.181022	PGC	0.732944	1.70914	2.89063e-250
STAR	Mesothelial	0.254749	0.0429053	0.0874372	0.0569926	Supporting	0.729815	2.86483	0
HS3ST3A1	Mesothelial	0.283712	0.061718	0.139483	0.0764802	Supporting	0.729346	2.57072	2.8574e-297
CLDN6	Epithelial	0.866545	0.0112484	0.170354	0.0209373	PGC	3.35025	3.86622	0
AC003688.1	Epithelial	0.78245	0.020884	0.396018	0.029511	PGC	2.75656	3.52299	0
CLDN4	Epithelial	0.612431	0.00550901	0.0331858	0.0123843	PGC	2.68939	4.39133	0
TTR	Epithelial	0.49543	0.00190616	0.00342572	0.00749684	Mesothelial	2.42427	4.89327	0
AMBP	Epithelial	0.482633	0.00173858	0.00594648	0.0071862	Macrophages	2.38208	4.93559	0
GRB7	Epithelial	0.49543	0.0035819	0.0171286	0.0091536	Mesothelial	2.32535	4.69361	0
SHH	Epithelial	0.460695	0.00163385	0.00801012	0.00683414	Oogonia_meiotic	2.29694	4.98582	0
FAM183A	Epithelial	0.491773	0.00400084	0.0309735	0.00952637	PGC	2.28856	4.65369	0
CLDN3	Epithelial	0.561243	0.0118768	0.150442	0.0181001	PGC	2.25162	4.01184	0
FOXA1	Epithelial	0.466179	0.00324675	0.0392074	0.0084909	Oogonia_meiotic	2.2231	4.76876	0
CPM	Epithelial	0.621572	0.0331588	0.0553908	0.0398244	Mesenchymal	2.0035	3.22328	0
TMPRSS2	Epithelial	0.382084	0.00108923	0.00716695	0.00540518	Oogonia_meiotic	1.99463	5.2204	0
SPINT1	Epithelial	0.484461	0.0111227	0.0855818	0.0164848	Oogonia_meiotic	1.98887	4.10532	0
FERMT1	Epithelial	0.394881	0.00316297	0.0199115	0.00760039	PGC	1.92684	4.87956	0
WFDC2	Epithelial	0.731261	0.068517	0.595133	0.0760246	PGC	1.88424	2.5767	0
LGALS2	Epithelial	0.486289	0.0176163	0.169418	0.0229254	Mesothelial	1.83599	3.77551	8.40157e-288
CRB3	Epithelial	0.561243	0.0320486	0.340219	0.0380434	Oogonia_meiotic	1.83472	3.26903	5.05376e-287
SPINK1	Epithelial	0.334552	0.000733138	0.00442478	0.00451467	PGC	1.80672	5.40042	0
CLDN8	Epithelial	0.332724	0.000754085	0.0132743	0.00451467	PGC	1.79685	5.40042	0
F2RL1	Epithelial	0.396709	0.00747801	0.0311429	0.0118873	Mesothelial	1.75833	4.43229	7.30738e-279
OCLN	Epithelial	0.440585	0.0139506	0.0442478	0.0187835	PGC	1.75123	3.97478	2.87622e-269
DPP4	Epithelial	0.457038	0.017323	0.107755	0.0223041	Mesothelial	1.73811	3.80298	3.75918e-264
CDH1	Epithelial	0.435101	0.0138039	0.267699	0.0185764	PGC	1.73425	3.98586	2.1978e-265
KIF12	Epithelial	0.319927	0.000816925	0.0132743	0.00443183	PGC	1.73367	5.41894	5.60578e-309
CPN1	Epithelial	0.352834	0.00349811	0.027403	0.00745542	Oogonia_meiotic	1.72847	4.89881	5.06668e-284
CDX2	Epithelial	0.449726	0.0167155	0.39823	0.0216207	PGC	1.72429	3.8341	3.59442e-261
CLIC6	Epithelial	0.380256	0.00691244	0.0189713	0.0111417	Oogonia_meiotic	1.71003	4.49706	7.92684e-269
EPCAM	Epithelial	0.923218	0.149455	0.929204	0.158221	PGC	1.7022	1.84376	0
CYSTM1	Epithelial	0.650823	0.0726854	0.546796	0.0792346	Oogonia_meiotic	1.65006	2.53534	8.4078e-251
TSPAN8	Epithelial	0.510055	0.0432132	0.368474	0.0485017	Erythroid	1.54351	3.02616	6.74498e-214
KCNK1	Epithelial	0.49543	0.0399036	0.210177	0.0450639	PGC	1.53567	3.09967	6.55608e-212
OCIAD2	Epithelial	0.64351	0.0877671	0.195477	0.0940626	Supporting	1.52113	2.36379	2.25499e-219
RBP4	Epithelial	0.484461	0.0387935	0.235666	0.043842	Oogonia_meiotic	1.51499	3.12716	5.21405e-207
RAB25	Epithelial	0.299817	0.00303729	0.0663717	0.00639924	PGC	1.51455	5.05158	5.85399e-238
MAL2	Epithelial	0.276051	0.00123586	0.00884956	0.004349	PGC	1.50111	5.43781	6.093e-249
PRSS8	Epithelial	0.354662	0.0120654	0.035503	0.0159463	Mesothelial	1.46778	4.13853	4.40535e-207
ARL4C	Epithelial	0.771481	0.142731	0.429889	0.149854	Endothelial	1.46434	1.89809	1.42562e-232
PLAC8	Epithelial	0.674589	0.109656	0.44004	0.116056	Macrophages	1.45285	2.15368	1.40252e-208
PCSK9	Epithelial	0.297989	0.00450356	0.00996574	0.00782819	Mesothelial	1.44525	4.85002	9.34671e-217
GIPC2	Epithelial	0.303473	0.00532049	0.0774908	0.00869799	Endothelial	1.43988	4.74466	4.58421e-213
STX3	Epithelial	0.583181	0.0794093	0.506637	0.0851161	PGC	1.43681	2.46374	7.46388e-193
CDH16	Epithelial	0.288848	0.003938	0.0107681	0.00716549	Supporting	1.42647	4.93848	7.84103e-215
KLF5	Epithelial	0.627057	0.0981148	0.778761	0.104107	PGC	1.41861	2.26234	1.5616e-193
CDKN1A	Epithelial	0.760512	0.148932	0.623894	0.15586	PGC	1.41364	1.8588	5.77499e-218
ONECUT2	Epithelial	0.308958	0.00710096	0.0556492	0.0105204	Oogonia_meiotic	1.40713	4.55444	7.83448e-202
IHH	Epithelial	0.26691	0.00224131	0.0154867	0.00523951	PGC	1.40169	5.25153	3.61272e-218
LAD1	Epithelial	0.319927	0.00988689	0.0952974	0.0133991	Mesothelial	1.37971	4.31257	2.8145e-191
ACER2	Epithelial	0.533821	0.0706745	0.291513	0.0759211	Endothelial	1.37622	2.57806	1.92904e-175
TOX3	Epithelial	0.521024	0.0680142	0.197417	0.073146	Endothelial	1.36263	2.6153	9.13082e-172
EMB	Epithelial	0.581353	0.0922287	0.849558	0.0977696	PGC	1.35173	2.32514	3.00825e-173
RBP2	Epithelial	0.250457	0.00194805	0.0461255	0.00476319	Endothelial	1.33915	5.34684	5.21405e-207
EPS8L2	Epithelial	0.325411	0.0132593	0.0818584	0.0167954	PGC	1.32984	4.08665	6.89505e-177
PTH1R	Epithelial	0.581353	0.0978844	0.235729	0.103361	Mesenchymal	1.3194	2.26953	5.80483e-166
ST14	Epithelial	0.272395	0.00525765	0.121681	0.0082838	PGC	1.30571	4.79345	2.32644e-185
RCAN2	Epithelial	0.363803	0.0245915	0.0774908	0.0284342	Endothelial	1.2952	3.56016	7.02888e-162
C4orf19	Epithelial	0.263254	0.00454545	0.061447	0.00747613	Macrophages	1.2889	4.89604	4.24863e-184
DACT2	Epithelial	0.389397	0.0329284	0.134956	0.0369665	PGC	1.28413	3.29774	1.93726e-156
CMTM8	Epithelial	0.446069	0.0527231	0.667897	0.057179	Endothelial	1.27646	2.86157	1.82975e-151
SEMA3C	Epithelial	0.694698	0.153121	0.448458	0.159256	Mesothelial	1.27633	1.83724	2.82397e-172
CXADR	Epithelial	0.627057	0.125639	0.44005	0.131319	Mesothelial	1.273	2.03013	9.94702e-161
PLET1	Epithelial	0.248629	0.00349811	0.0287611	0.00627498	PGC	1.26084	5.07118	2.96567e-182
GJB1	Epithelial	0.213894	0.000377042	0.0110619	0.00279578	PGC	1.25762	5.87964	1.26101e-209
KRT8	Epithelial	0.893967	0.237558	0.704453	0.244993	Mesothelial	1.25739	1.40652	7.44575e-228
APOB	Epithelial	0.219378	0.000837872	0.00969646	0.00331352	Oogonia_meiotic	1.25259	5.70974	5.25798e-200
ARG1	Epithelial	0.343693	0.0250733	0.0518797	0.0286827	Mesenchymal	1.22061	3.55146	1.50442e-146
FOXA3	Epithelial	0.221207	0.0016548	0.00442478	0.0041419	PGC	1.21367	5.4866	3.58438e-183
ISX	Epithelial	0.294333	0.0130289	0.0352477	0.0162155	Supporting	1.21318	4.12178	7.60964e-154
RNASE4	Epithelial	0.546618	0.104252	0.27552	0.109263	Macrophages	1.21021	2.21399	6.22209e-139
AP1M2	Epithelial	0.296161	0.0142438	0.187184	0.0174374	Oogonia_meiotic	1.1992	4.04914	7.21017e-150
IRF6	Epithelial	0.277879	0.0103477	0.0774336	0.0133783	PGC	1.1988	4.31412	2.66786e-154
C1orf210	Epithelial	0.224863	0.00234604	0.0774336	0.00486673	PGC	1.19747	5.32533	4.00191e-175
ZCCHC18	Epithelial	0.349177	0.0292208	0.0550275	0.0328453	Mesenchymal	1.19277	3.41595	3.75477e-139
EZR	Epithelial	0.824497	0.228739	0.61881	0.235488	Mesothelial	1.1923	1.4461	2.64515e-186
PAX2	Epithelial	0.265082	0.00833682	0.0132743	0.0112453	PGC	1.18964	4.48781	1.32787e-155
PCBD1	Epithelial	0.702011	0.178236	0.402655	0.18417	PGC	1.18773	1.6919	4.18818e-154
SOX9	Epithelial	0.583181	0.125471	0.217157	0.130656	Supporting	1.18688	2.03519	7.6075e-137
MARVELD2	Epithelial	0.330896	0.0242773	0.123894	0.0277507	PGC	1.18609	3.58449	3.93214e-140
EMID1	Epithelial	0.460695	0.0734395	0.315498	0.0778263	Endothelial	1.17628	2.55328	1.0637e-128
ESRP1	Epithelial	0.363803	0.0361123	0.446903	0.0398244	PGC	1.17264	3.22328	9.3073e-133
RBM47	Epithelial	0.446069	0.0679724	0.316372	0.0722555	PGC	1.17207	2.62755	6.49821e-128
PROM1	Epithelial	0.422303	0.0586091	0.223247	0.0627291	Endothelial	1.16933	2.76893	6.11918e-128
DSP	Epithelial	0.429616	0.0619397	0.446903	0.0661047	PGC	1.16706	2.71651	3.44274e-127
FFAR4	Epithelial	0.212066	0.00180142	0.0243363	0.00418332	PGC	1.16141	5.47665	1.87002e-171
MAPK13	Epithelial	0.552102	0.117134	0.573009	0.122062	PGC	1.1612	2.10323	1.08291e-128
EFNB2	Epithelial	0.581353	0.131818	0.636531	0.136911	Endothelial	1.15598	1.98843	5.16057e-130
PDGFC	Epithelial	0.59415	0.137851	0.381813	0.14302	Mesothelial	1.15549	1.94477	3.5343e-131
TSPAN13	Epithelial	0.665448	0.1708	0.783186	0.176404	PGC	1.15454	1.73498	2.12338e-140
PRSS23	Epithelial	0.528336	0.107729	0.258303	0.112494	Endothelial	1.15434	2.18485	1.00362e-125
AFP	Epithelial	0.206581	0.00167574	0.00891972	0.00399693	Macrophages	1.14079	5.52223	2.88932e-168
TM4SF4	Epithelial	0.202925	0.00134059	0.00442478	0.00362416	PGC	1.14047	5.62013	4.84266e-171
TUBB4A	Epithelial	0.294333	0.017721	0.0333555	0.0208545	Mesenchymal	1.13912	3.87019	2.6076e-135
PALM3	Epithelial	0.466179	0.0829493	0.181252	0.0872906	Mesothelial	1.13678	2.43851	4.72997e-120
KRT18	Epithelial	0.915905	0.282426	0.828402	0.289602	Mesothelial	1.13503	1.23925	7.62269e-210
BSPRY	Epithelial	0.319927	0.0270004	0.150442	0.0303187	PGC	1.11846	3.49599	8.53465e-126
ARHGEF16	Epithelial	0.26691	0.0127357	0.0929204	0.015615	PGC	1.11022	4.15953	1.71239e-134
BEX1	Epithelial	0.884826	0.278592	0.938053	0.28546	PGC	1.10927	1.25365	9.20142e-190
RPRM	Epithelial	0.276051	0.0154168	0.0261601	0.0183693	Mesothelial	1.1034	3.99707	1.47868e-130
DDAH1	Epithelial	0.621572	0.16527	0.54428	0.170439	Endothelial	1.0998	1.76938	1.71696e-122
RIPK4	Epithelial	0.265082	0.0130917	0.152614	0.0159463	Oogonia_meiotic	1.09705	4.13853	1.16919e-131
FGD2	Epithelial	0.230347	0.00611646	0.14668	0.00865657	Macrophages	1.09402	4.74944	9.95597e-142
MMP2	Mesenchymal	0.682305	0.0879187	0.380074	0.291259	Endothelial	0.841654	1.23354	0
MFAP4	Mesenchymal	0.783401	0.113731	0.261912	0.342825	Mesothelial	0.838658	1.07053	0
COL1A1	Mesenchymal	0.798474	0.129564	0.301152	0.358399	Mesothelial	0.819322	1.02611	0
EMILIN1	Mesenchymal	0.62195	0.0879187	0.420664	0.270611	Endothelial	0.812934	1.30707	0
PRRX1	Mesenchymal	0.505297	0.0436603	0.127686	0.201586	Mesothelial	0.809252	1.60154	0
CDH11	Mesenchymal	0.65349	0.101864	0.320461	0.290575	Mesothelial	0.807644	1.23589	0
SFRP1	Mesenchymal	0.786791	0.135671	0.395515	0.358419	Mesothelial	0.807288	1.02605	0
CLMP	Mesenchymal	0.577456	0.0756422	0.297727	0.247313	Mesothelial	0.806765	1.3971	0
PDGFRA	Mesenchymal	0.513046	0.0587069	0.192775	0.214136	Mesothelial	0.790676	1.54114	0
TCF21	Mesenchymal	0.454144	0.0368295	0.179695	0.179593	Mesothelial	0.779793	1.71706	0
ISLR	Mesenchymal	0.468249	0.0470599	0.0984117	0.191149	Mesothelial	0.774813	1.6547	0
SPARCL1	Mesenchymal	0.62419	0.115053	0.819188	0.289229	Endothelial	0.774331	1.24054	0
TPM2	Mesenchymal	0.562806	0.0917905	0.271878	0.252925	Mesothelial	0.773668	1.37466	0
BGN	Mesenchymal	0.682366	0.138725	0.523985	0.324704	Endothelial	0.767552	1.12484	0
LHFPL6	Mesenchymal	0.483201	0.0646248	0.196823	0.20782	Mesothelial	0.759149	1.57108	0
SULF2	Mesenchymal	0.61626	0.130005	0.424779	0.296353	PGC	0.749498	1.2162	0
COL1A2	Mesenchymal	0.85774	0.191199	0.503581	0.419223	Mesothelial	0.745679	0.869353	0
COL6A3	Mesenchymal	0.40184	0.029684	0.0541887	0.156999	Mesothelial	0.744014	1.85152	0
LPAR1	Mesenchymal	0.48641	0.0783178	0.270567	0.217926	Epithelial	0.741093	1.5236	0
LSP1	Mesenchymal	0.702101	0.169258	0.622398	0.351544	Macrophages	0.733991	1.04542	0
NCAM1	Mesenchymal	0.758581	0.18399	0.416819	0.380558	Epithelial	0.732878	0.966117	0
CXCL12	Mesenchymal	0.41879	0.0464304	0.173675	0.173815	Epithelial	0.732785	1.74976	0
MEIS2	Mesenchymal	0.720201	0.175648	0.638376	0.36194	Endothelial	0.731923	1.01628	0
OLFML3	Mesenchymal	0.428476	0.0527575	0.133796	0.181291	Macrophages	0.731688	1.70765	0
LOXL1	Mesenchymal	0.456141	0.0698187	0.241046	0.20198	Mesothelial	0.729638	1.59959	0
CNN2	Mesenchymal	0.596828	0.138662	0.706642	0.2954	Endothelial	0.727786	1.21942	0
FBLN1	Mesenchymal	0.640172	0.155849	0.559735	0.321536	PGC	0.726369	1.13465	0
OAF	Mesenchymal	0.483625	0.0876668	0.225092	0.223124	Endothelial	0.72545	1.50003	0
DCN	Mesenchymal	0.615413	0.148357	0.560262	0.308137	Mesothelial	0.724471	1.17721	0
IGFBP7	Mesenchymal	0.441128	0.0651599	0.749077	0.193779	Endothelial	0.723908	1.64104	0
ACTA2	Mesenchymal	0.45941	0.080238	0.142323	0.209953	Mesothelial	0.717081	1.56087	0
TRIL	Mesenchymal	0.562928	0.135766	0.321033	0.281898	Endothelial	0.712785	1.26621	0
ITIH5	Mesenchymal	0.419396	0.0597771	0.0951327	0.182803	PGC	0.712699	1.69935	0
RHOJ	Mesenchymal	0.439615	0.0734387	0.738007	0.198708	Endothelial	0.710383	1.61592	0
TGFB2	Mesenchymal	0.502633	0.10945	0.448339	0.243958	Endothelial	0.709095	1.41076	0
DLK1	Mesenchymal	0.833767	0.216098	0.669262	0.427403	Mesothelial	0.708726	0.850028	0
PDGFRB	Mesenchymal	0.354198	0.0225699	0.0685145	0.13602	Mesothelial	0.706609	1.99495	0
LUM	Mesenchymal	0.378897	0.0392848	0.0644202	0.155466	Macrophages	0.705251	1.86133	0
MYLK	Mesenchymal	0.525456	0.129124	0.343173	0.264709	Endothelial	0.698396	1.32912	0
AC055839.2	Mesenchymal	0.635692	0.178293	0.541133	0.334769	Epithelial	0.695647	1.09431	0
CSRP1	Mesenchymal	0.648223	0.185564	0.684502	0.34384	Endothelial	0.69203	1.06758	0
SELENOM	Mesenchymal	0.585023	0.16504	0.581181	0.308717	Endothelial	0.687596	1.17533	0
PTN	Mesenchymal	0.916278	0.243421	0.471816	0.473606	Mesothelial	0.684808	0.74738	0
NR2F2	Mesenchymal	0.836431	0.238447	0.667897	0.443018	Endothelial	0.680976	0.814145	0
CADM1	Mesenchymal	0.471699	0.118578	0.652651	0.239381	Epithelial	0.674387	1.4297	0
LBH	Mesenchymal	0.57897	0.173823	0.282467	0.312424	Mesothelial	0.673571	1.1634	0
RBMS3	Mesenchymal	0.561777	0.167999	0.467767	0.302711	Mesothelial	0.671311	1.19498	0
MXRA8	Mesenchymal	0.41643	0.0878872	0.265338	0.200282	Mesothelial	0.669632	1.60803	0
GNG11	Mesenchymal	0.415885	0.0887686	0.95203	0.200675	Endothelial	0.667939	1.60607	0
COL6A2	Mesenchymal	0.518736	0.149868	0.326378	0.276058	Mesothelial	0.667689	1.28715	0
BICC1	Mesenchymal	0.387735	0.0712982	0.351005	0.179551	Epithelial	0.665855	1.71729	0
PMEPA1	Mesenchymal	0.37363	0.0618232	0.450185	0.168493	Endothelial	0.665385	1.78086	0
NREP	Mesenchymal	0.753678	0.237661	0.740402	0.41419	Epithelial	0.664314	0.88143	0
NID1	Mesenchymal	0.515528	0.151158	0.697417	0.275809	Endothelial	0.664023	1.28805	0
WNT5A	Mesenchymal	0.399298	0.0810564	0.303021	0.189927	Mesothelial	0.66328	1.66112	0
CSRP2	Mesenchymal	0.544646	0.167055	0.708487	0.296229	Endothelial	0.662628	1.21662	0
HSD11B2	Mesenchymal	0.326896	0.0315727	0.124314	0.132603	Epithelial	0.66046	2.0204	0
FN1	Mesenchymal	0.514317	0.154369	0.725664	0.277507	PGC	0.659307	1.28191	0
MEIS1	Mesenchymal	0.692294	0.226958	0.556836	0.386149	Mesothelial	0.658739	0.951531	0
COL5A2	Mesenchymal	0.488347	0.140645	0.381919	0.259594	Endothelial	0.658603	1.34864	0
DPYSL3	Mesenchymal	0.45711	0.124717	0.562731	0.238429	Endothelial	0.655352	1.43369	0
TGFBI	Mesenchymal	0.643804	0.219372	0.433579	0.36457	Endothelial	0.649622	1.00904	0
FBLIM1	Mesenchymal	0.389067	0.0842672	0.533821	0.188539	Epithelial	0.649138	1.66845	0
EDNRA	Mesenchymal	0.354985	0.0604382	0.139209	0.161203	Mesothelial	0.647881	1.82509	0
NGFR	Mesenchymal	0.300139	0.0198313	0.0707965	0.115725	PGC	0.647263	2.15654	0
CPED1	Mesenchymal	0.318119	0.0340594	0.180812	0.131236	Endothelial	0.646021	2.03076	0
ADAMTS2	Mesenchymal	0.366669	0.0707001	0.136406	0.171951	Mesothelial	0.645537	1.76055	0
COL26A1	Mesenchymal	0.385919	0.0860929	0.188415	0.188664	Mesothelial	0.643632	1.66779	0
GPM6B	Mesenchymal	0.416066	0.110992	0.192391	0.215358	Supporting	0.63885	1.53545	0
PTGIS	Mesenchymal	0.357407	0.069378	0.16786	0.167913	Mesothelial	0.637725	1.78431	0
AKAP12	Mesenchymal	0.478661	0.153299	0.710177	0.264605	PGC	0.636387	1.32952	0
PLAGL1	Mesenchymal	0.515225	0.175208	0.714022	0.291528	Endothelial	0.635077	1.23262	0
LTBP4	Mesenchymal	0.377444	0.0875724	0.399253	0.186738	Mesothelial	0.63337	1.67805	0
COL6A1	Mesenchymal	0.549852	0.194535	0.351292	0.316089	Mesothelial	0.633281	1.15173	0
PHLDA3	Mesenchymal	0.42327	0.121254	0.313653	0.224574	Endothelial	0.632175	1.49355	0
HIC1	Mesenchymal	0.289243	0.0207756	0.175277	0.112618	Endothelial	0.631634	2.18375	0
UNC5C	Mesenchymal	0.303408	0.0322337	0.111492	0.125003	Mesothelial	0.630913	2.07942	0
VCAN	Mesenchymal	0.376778	0.0893981	0.440585	0.187711	Epithelial	0.630294	1.67285	0
KDELR3	Mesenchymal	0.333434	0.0570071	0.146372	0.151573	Mesothelial	0.629087	1.88669	0
PLOD2	Mesenchymal	0.451056	0.143037	0.416819	0.248411	Epithelial	0.628174	1.39267	0
LPAR4	Mesenchymal	0.382287	0.0964807	0.738007	0.194255	Endothelial	0.626409	1.63858	0
RBP1	Mesenchymal	0.905018	0.290324	0.859779	0.500611	Endothelial	0.626206	0.691926	0
SNAI2	Mesenchymal	0.419517	0.123583	0.320772	0.224822	Mesothelial	0.626106	1.49244	0
CAMK2N1	Mesenchymal	0.359102	0.0797343	0.453382	0.175306	Epithelial	0.625276	1.74122	0
COPZ2	Mesenchymal	0.451601	0.146468	0.292744	0.250854	Mesothelial	0.624512	1.38288	0
NFIX	Mesenchymal	0.377444	0.0943402	0.212395	0.19119	Mesothelial	0.624476	1.65449	0
RND3	Mesenchymal	0.551183	0.203475	0.522852	0.322426	Epithelial	0.623874	1.13188	0
GPC6	Mesenchymal	0.34421	0.0697557	0.451554	0.163647	Epithelial	0.623036	1.81005	0
FGFR1	Mesenchymal	0.518131	0.188649	0.612832	0.301365	PGC	0.621463	1.19943	0
LRRC17	Mesenchymal	0.294267	0.0310375	0.0641593	0.121088	PGC	0.621267	2.11123	0
FKBP7	Mesenchymal	0.441128	0.14609	0.392989	0.247023	Endothelial	0.616818	1.39827	0
TAGLN	Mesenchymal	0.333374	0.0656006	0.239801	0.157206	Mesothelial	0.616808	1.8502	0
GRB10	Mesenchymal	0.802228	0.289851	0.843173	0.465136	Endothelial	0.614046	0.765426	0
FREM1	Mesenchymal	0.279436	0.0240494	0.0644659	0.111417	Mesothelial	0.613215	2.19447	0
POSTN	Mesenchymal	0.275622	0.0211848	0.0569916	0.108228	Mesothelial	0.61285	2.22352	0
COL5A1	Mesenchymal	0.389733	0.112912	0.201806	0.207613	Mesothelial	0.612692	1.57208	0
FBN1	Mesenchymal	0.396513	0.11883	0.279041	0.213826	Mesothelial	0.611659	1.54259	0
SLIT2	Mesenchymal	0.467522	0.171242	0.38575	0.272599	Oogonia_meiotic	0.607663	1.29975	0
ELN	Mesenchymal	0.36903	0.102115	0.380878	0.193427	Mesothelial	0.606263	1.64286	0
HMGN3	Mesenchymal	0.525213	0.207693	0.537477	0.316317	Epithelial	0.604526	1.15101	0
GYPE	Erythroid	0.910744	0.0208747	0.0404722	0.0755897	Oogonia_meiotic	2.35194	2.58244	0
ALAS2	Erythroid	0.867295	0.0281345	0.0498155	0.0797316	Endothelial	2.19347	2.52909	0
RHD	Erythroid	0.759852	0.0198376	0.0884956	0.0653385	PGC	2.07301	2.72817	0
SLC4A1	Erythroid	0.747053	0.0178296	0.0328836	0.062667	Oogonia_meiotic	2.06928	2.76992	0
TRIM10	Erythroid	0.646682	0.00560484	0.0139123	0.0450225	Oogonia_meiotic	2.0051	3.10059	0
TSPO2	Erythroid	0.652071	0.00787766	0.0199115	0.0474869	PGC	1.98706	3.0473	0
HEMGN	Erythroid	0.693499	0.0165276	0.0317146	0.0581523	Macrophages	1.97279	2.84469	0
ERMAP	Erythroid	0.636915	0.00723774	0.0221402	0.0459544	Endothelial	1.96176	3.08011	0
KLF1	Erythroid	0.632873	0.0137473	0.0324621	0.0518152	Oogonia_meiotic	1.87335	2.96007	0
NXPE2	Erythroid	0.603233	0.0094223	0.125461	0.0459337	Endothelial	1.85829	3.08056	0
RHAG	Erythroid	0.5581	0.00410433	0.0154867	0.0381676	PGC	1.82263	3.26577	0
CA2	Erythroid	0.940047	0.097864	0.238007	0.149647	Endothelial	1.7856	1.89948	0
LMO2	Erythroid	0.670933	0.0322388	0.819188	0.0715099	Endothelial	1.76987	2.63792	0
SNCA	Erythroid	0.861906	0.0839622	0.199856	0.131795	Supporting	1.74666	2.02651	0
EPB42	Erythroid	0.515999	0.00403813	0.0110701	0.0355168	Endothelial	1.72227	3.33775	0
KEL	Erythroid	0.513304	0.00498698	0.0138751	0.0362416	Macrophages	1.70291	3.31755	0
ISG20	Erythroid	0.551701	0.0131515	0.0910624	0.046265	Oogonia_meiotic	1.69558	3.07337	0
SLC25A37	Erythroid	0.855507	0.09921	0.225092	0.145712	Endothelial	1.64781	1.92612	0
PNPO	Erythroid	0.81711	0.0893685	0.280973	0.134115	PGC	1.64162	2.00906	0
KCNN4	Erythroid	0.475918	0.00737014	0.0455897	0.0361795	Macrophages	1.5797	3.31926	0
FAM210B	Erythroid	0.728528	0.0774085	0.353982	0.117444	PGC	1.56036	2.1418	0
TAL1	Erythroid	0.462782	0.00820866	0.291513	0.0361588	Endothelial	1.53636	3.31983	0
SPTA1	Erythroid	0.441226	0.00481045	0.0639854	0.0316441	Epithelial	1.52364	3.4532	0
ICAM4	Erythroid	0.525429	0.0244274	0.141593	0.0552323	PGC	1.52175	2.89621	0
C17orf99	Erythroid	0.417312	0.00311135	0.00792864	0.0285791	Macrophages	1.48358	3.55508	0
ADD2	Erythroid	0.468171	0.0162629	0.0956998	0.0440491	Oogonia_meiotic	1.46184	3.12245	0
ANK1	Erythroid	0.438531	0.00970917	0.0404722	0.036076	Oogonia_meiotic	1.45686	3.32213	0
TUBA4A	Erythroid	0.580667	0.0507745	0.327056	0.0833558	Macrophages	1.44275	2.48464	0
TSPAN33	Erythroid	0.653419	0.0787766	0.389966	0.114109	Oogonia_meiotic	1.41831	2.1706	0
SLC38A5	Erythroid	0.427753	0.0118496	0.0187057	0.0374221	Mesenchymal	1.40538	3.28549	0
EPOR	Erythroid	0.421354	0.0105256	0.0426165	0.035786	Macrophages	1.40319	3.3302	0
E2F2	Erythroid	0.524756	0.0395428	0.232301	0.0693769	PGC	1.40015	2.6682	0
NFE2	Erythroid	0.426406	0.0125116	0.207136	0.0379605	Macrophages	1.39486	3.27121	0
SPTB	Erythroid	0.441563	0.0166159	0.0796796	0.0427444	Oogonia_meiotic	1.39203	3.15252	0
MYLK3	Erythroid	0.438531	0.0178516	0.0694488	0.0437178	Mesothelial	1.3726	3.13	0
AQP1	Erythroid	0.438868	0.0198597	0.304428	0.045623	Endothelial	1.35494	3.08734	0
TMOD1	Erythroid	0.43449	0.0194404	0.0408938	0.0449603	Oogonia_meiotic	1.34778	3.10197	0
UBE2L6	Erythroid	0.825194	0.154067	0.282125	0.195332	Supporting	1.34759	1.63305	0
DHRS11	Erythroid	0.531829	0.0545699	0.121536	0.0839149	Supporting	1.31785	2.47795	0
FECH	Erythroid	0.903671	0.188821	0.307522	0.232775	PGC	1.31727	1.45768	0
GATA1	Erythroid	0.439542	0.0245156	0.0734974	0.0500342	Mesothelial	1.31645	2.99505	0
CTSE	Erythroid	0.393735	0.0134825	0.0396432	0.0368629	Macrophages	1.29954	3.30055	0
TNFAIP2	Erythroid	0.447625	0.031621	0.363726	0.0571997	Macrophages	1.28075	2.86121	0
LYL1	Erythroid	0.391714	0.0152257	0.337638	0.0383747	Endothelial	1.27713	3.26036	0
DMTN	Erythroid	0.393735	0.0159098	0.108856	0.039141	Endothelial	1.27593	3.24059	0
GFI1B	Erythroid	0.34254	0.00421466	0.0188305	0.0250171	Macrophages	1.26335	3.6882	0
ACP5	Erythroid	0.456383	0.0391015	0.0973451	0.0647586	PGC	1.24916	2.73709	0
ABCB10	Erythroid	0.591445	0.0960766	0.391593	0.126535	PGC	1.22266	2.06724	0
SLC43A1	Erythroid	0.485685	0.0573061	0.193727	0.0836457	Endothelial	1.20507	2.48117	0
TMCC2	Erythroid	0.420007	0.0334746	0.10118	0.0572411	Oogonia_meiotic	1.20142	2.86048	0
RBM38	Erythroid	0.654766	0.128669	0.619469	0.161016	PGC	1.19577	1.82625	0
ABCB4	Erythroid	0.330414	0.00973123	0.0552277	0.0294489	Oogonia_meiotic	1.16474	3.5251	0
CDC25B	Erythroid	0.482317	0.0670594	0.126143	0.0925922	Epithelial	1.1477	2.37955	0
SLC16A10	Erythroid	0.432132	0.047928	0.169899	0.0715513	Oogonia_meiotic	1.13968	2.63734	0
TSPAN8	Erythroid	0.368474	0.0275387	0.510055	0.0485017	Epithelial	1.11506	3.02616	0
HEBP1	Erythroid	0.661502	0.15528	0.302583	0.186406	Endothelial	1.11121	1.67983	0
CDR2	Erythroid	0.476591	0.0731497	0.356089	0.097956	Endothelial	1.10723	2.32324	0
ITGA4	Erythroid	0.371169	0.0298336	0.249752	0.0508211	Macrophages	1.10588	2.97944	0
MT1X	Erythroid	0.638599	0.151044	0.676991	0.181022	PGC	1.09145	1.70914	0
TSPAN32	Erythroid	0.383631	0.0384174	0.207136	0.0596434	Macrophages	1.0816	2.81937	0
CPOX	Erythroid	0.736612	0.197405	0.581858	0.230559	PGC	1.08079	1.46725	0
BPGM	Erythroid	0.648703	0.161944	0.338208	0.191874	Epithelial	1.07096	1.65092	0
UROS	Erythroid	0.446615	0.0692881	0.181416	0.0924887	PGC	1.06324	2.38067	0
CHAC2	Erythroid	0.443584	0.0683614	0.201327	0.0914325	PGC	1.06112	2.39215	0
MFSD2B	Erythroid	0.270125	0.00454566	0.0160202	0.0208752	Oogonia_meiotic	1.04516	3.86919	0
SOX6	Erythroid	0.45133	0.0761728	0.358767	0.09924	Mesothelial	1.04267	2.31021	0
EHBP1L1	Erythroid	0.38262	0.0455448	0.29336	0.0662704	Macrophages	1.03844	2.71401	0
FN3K	Erythroid	0.279892	0.00951057	0.0189519	0.0261354	Supporting	1.02006	3.64446	0
PTP4A3	Erythroid	0.583025	0.149256	0.654982	0.175927	Endothelial	1.01311	1.73768	0
TXNRD2	Erythroid	0.499832	0.109603	0.446903	0.133597	PGC	1.00612	2.01293	0
ARRB1	Erythroid	0.362748	0.0430955	0.289668	0.0627498	Endothelial	1.00431	2.7686	0
FAM241A	Erythroid	0.401819	0.0614105	0.427909	0.082341	Oogonia_meiotic	1.0033	2.49689	0
SLC30A10	Erythroid	0.248232	0.00328788	0.104205	0.0183486	Epithelial	0.99248	3.9982	0
PIGQ	Erythroid	0.526777	0.128426	0.446903	0.152919	PGC	0.989206	1.87785	0
IFT140	Erythroid	0.39744	0.0629331	0.25	0.0835007	PGC	0.986804	2.4829	0
IFRD2	Erythroid	0.488717	0.110243	0.506637	0.133514	PGC	0.984054	2.01355	0
PPOX	Erythroid	0.555069	0.144843	0.214602	0.170066	PGC	0.983341	1.77157	0
SLFN14	Erythroid	0.239475	0.00388367	0.00847093	0.0183693	Supporting	0.957197	3.99707	0
GYPC	Erythroid	0.47255	0.110817	0.326568	0.133059	Endothelial	0.953117	2.01697	0
SLC22A4	Erythroid	0.237791	0.00432499	0.0420354	0.01868	PGC	0.946478	3.9803	0
GRINA	Erythroid	0.690805	0.225893	0.482656	0.254478	Macrophages	0.945394	1.36854	0
REC114	Erythroid	0.38902	0.0692219	0.778761	0.0888852	PGC	0.941587	2.42041	0
SLC39A8	Erythroid	0.285618	0.0208968	0.247232	0.0371736	Endothelial	0.9403	3.29216	0
MKI67	Erythroid	0.627821	0.197162	0.688053	0.223642	PGC	0.940293	1.49771	0
AC087721.2	Erythroid	0.593803	0.180061	0.743363	0.2055	PGC	0.939578	1.58231	0
SLC25A21	Erythroid	0.302459	0.027958	0.159049	0.0448361	Epithelial	0.939056	3.10474	0
SLC1A5	Erythroid	0.368137	0.0590494	0.268739	0.0780541	Epithelial	0.93888	2.55035	0
TFRC	Erythroid	0.647019	0.207401	0.640388	0.234432	Oogonia_meiotic	0.93856	1.45059	0
SMIM5	Erythroid	0.244864	0.00737014	0.100099	0.0219728	Macrophages	0.934877	3.81795	0
RAD23A	Erythroid	0.693836	0.23174	0.570796	0.260153	PGC	0.934241	1.34649	0
UBE2C	Erythroid	0.753789	0.261508	0.969027	0.291776	PGC	0.928493	1.23177	0
EIF2AK1	Erythroid	0.578309	0.179642	0.457965	0.204154	PGC	0.918863	1.58888	0
PDZK1IP1	Erythroid	0.233075	0.00586963	0.14808	0.0198397	Epithelial	0.913671	3.92007	0
BLVRB	Erythroid	0.955204	0.348383	0.426902	0.385694	Mesenchymal	0.910033	0.952711	0
DAPK2	Erythroid	0.347255	0.0564014	0.145756	0.074285	Endothelial	0.90281	2.59985	0
TRAK2	Erythroid	0.396093	0.0849773	0.195572	0.104107	Endothelial	0.896097	2.26234	0
PKLR	Erythroid	0.21354	0.00214043	0.023766	0.0151387	Epithelial	0.89484	4.1905	0
AL049629.2	Erythroid	0.467834	0.127256	0.319188	0.148197	Endothelial	0.893194	1.90921	0
MGLL	Erythroid	0.285281	0.0284214	0.413284	0.0442148	Endothelial	0.889705	3.1187	0
STOM	Erythroid	0.440216	0.114656	0.201183	0.134674	Mesothelial	0.882588	2.0049	0
CD52	Macrophages	0.868186	0.0103008	0.0464602	0.0282271	PGC	3.09723	3.56747	0
FCER1G	Macrophages	0.924678	0.0167943	0.0682657	0.0357653	Endothelial	3.0799	3.33078	0
TYROBP	Macrophages	0.89891	0.0163713	0.0707965	0.0348127	PGC	3.01834	3.35777	0
CD53	Macrophages	0.727453	0.00200939	0.0110619	0.0171682	PGC	2.95688	4.0647	0
SPI1	Macrophages	0.733399	0.00340539	0.00922509	0.0186593	Endothelial	2.91997	3.98141	0
CORO1A	Macrophages	0.859267	0.0160328	0.039823	0.033653	PGC	2.91434	3.39165	0
GMFG	Macrophages	0.846383	0.0156733	0.346863	0.0330317	Endothelial	2.88641	3.41029	0
LAPTM5	Macrophages	0.751239	0.00683193	0.151292	0.022387	Endothelial	2.85416	3.79928	0
ALOX5AP	Macrophages	0.792864	0.0133889	0.0867159	0.0296767	Endothelial	2.78881	3.51739	0
PTPRC	Macrophages	0.647175	0.00154406	0.00572583	0.0150351	Erythroid	2.71643	4.19737	0
LST1	Macrophages	0.749257	0.0119929	0.0590406	0.0273987	Endothelial	2.69527	3.59726	0
RAC2	Macrophages	0.880079	0.0299717	0.276861	0.0477354	Erythroid	2.67727	3.04208	0
SLFN12	Macrophages	0.654113	0.00590126	0.0904059	0.0194462	Endothelial	2.57727	3.9401	0
LCP1	Macrophages	0.804757	0.0259952	0.643911	0.0422681	Endothelial	2.54603	3.16372	0
NCF1	Macrophages	0.613479	0.00522442	0.0184502	0.0179344	Endothelial	2.46682	4.02103	0
SRGN	Macrophages	0.812686	0.0331867	0.416974	0.049475	Endothelial	2.44317	3.00629	0
C5AR1	Macrophages	0.558969	0.00171327	0.00663717	0.0133576	PGC	2.41233	4.31567	0
SAMSN1	Macrophages	0.657086	0.0130505	0.195572	0.0265082	Endothelial	2.38542	3.6303	0
PLEK	Macrophages	0.616452	0.0101527	0.0202952	0.0228219	Endothelial	2.33021	3.78004	0
NCF2	Macrophages	0.65114	0.0147003	0.125461	0.0279993	Endothelial	2.3282	3.57558	0
CYBB	Macrophages	0.518335	0.00162866	0.00442478	0.0124257	PGC	2.27445	4.38799	0
IGSF6	Macrophages	0.539148	0.00408224	0.00927487	0.0152629	Oogonia_meiotic	2.25489	4.18233	0
HCLS1	Macrophages	0.525273	0.00395533	0.103321	0.0148487	Endothelial	2.21131	4.20984	0
ARHGDIB	Macrophages	0.869177	0.0635602	0.297048	0.0803943	Endothelial	2.19103	2.52081	0
CCL18	Macrophages	0.519326	0.00568975	0.0221239	0.0164226	PGC	2.13396	4.10909	0
ARHGAP30	Macrophages	0.479683	0.00230551	0.0221239	0.0122807	PGC	2.11047	4.39972	0
C19orf38	Macrophages	0.482656	0.00327848	0.017285	0.0132955	Oogonia_meiotic	2.08523	4.32033	0
CD14	Macrophages	0.473736	0.00442066	0.0219378	0.0142274	Epithelial	2.0146	4.25258	0
NCF4	Macrophages	0.555005	0.015504	0.188616	0.0267774	Erythroid	2.00923	3.6202	0
LGALS3	Macrophages	0.480674	0.00767799	0.0786106	0.0175617	Epithelial	1.9429	4.04204	0
CYTH4	Macrophages	0.437066	0.00270739	0.103321	0.0117837	Endothelial	1.94103	4.44104	0
HCST	Macrophages	0.454906	0.00465333	0.0539629	0.0140618	Oogonia_meiotic	1.93985	4.2643	0
MCEMP1	Macrophages	0.457879	0.00503405	0.0132743	0.0144967	PGC	1.93859	4.23384	0
CSTA	Macrophages	0.488603	0.0092432	0.0158302	0.0192598	Erythroid	1.92985	3.94973	0
FYB1	Macrophages	0.618434	0.0324041	0.216814	0.0446497	PGC	1.92265	3.10891	0
MYO1F	Macrophages	0.407334	0.000697999	0.0110619	0.00919502	PGC	1.91003	4.68909	0
HP	Macrophages	0.461843	0.00685308	0.0168407	0.0163605	Erythroid	1.89951	4.11288	0
ITGB2	Macrophages	0.419227	0.00215745	0.0124621	0.0108725	Erythroid	1.89554	4.52152	0
PTPN18	Macrophages	0.649158	0.0478024	0.560886	0.0603682	Endothelial	1.82238	2.80729	0
SLA	Macrophages	0.379584	0.000930665	0.00553506	0.00884296	Endothelial	1.79472	4.72813	0
CLEC12A	Macrophages	0.382557	0.00120563	0.00663717	0.00917431	PGC	1.79471	4.69135	0
FERMT3	Macrophages	0.538157	0.0249376	0.250589	0.0356618	Erythroid	1.79404	3.33368	0
PTPN6	Macrophages	0.591675	0.0375439	0.542035	0.049123	PGC	1.78297	3.01343	0
PTAFR	Macrophages	0.378593	0.00137485	0.00369004	0.00925715	Endothelial	1.77271	4.68236	0
SLPI	Macrophages	0.396432	0.00363806	0.0154867	0.0118458	PGC	1.75849	4.43578	0
LRRC25	Macrophages	0.371655	0.00107873	0.00505902	0.00882225	Oogonia_meiotic	1.75811	4.73048	0
CTSS	Macrophages	0.384539	0.00245357	0.00738007	0.0104376	Endothelial	1.7544	4.56234	0
LCP2	Macrophages	0.370664	0.00109988	0.00663717	0.00882225	PGC	1.75342	4.73048	0
LYN	Macrophages	0.558969	0.0325521	0.605166	0.0435521	Endothelial	1.7517	3.1338	0
CD37	Macrophages	0.417245	0.00748763	0.0619737	0.0160499	Erythroid	1.72408	4.13205	0
HCK	Macrophages	0.387512	0.00382842	0.0154867	0.0118458	PGC	1.71892	4.43578	0
PSMB8	Macrophages	0.442022	0.0118237	0.197417	0.0208131	Endothelial	1.71159	3.87217	0
NRROS	Macrophages	0.446977	0.0131351	0.287823	0.0222006	Endothelial	1.70193	3.80764	0
CD300C	Macrophages	0.350842	0.000613393	0.00126476	0.00793174	Oogonia_meiotic	1.69698	4.83688	0
VSIR	Macrophages	0.450942	0.014383	0.226937	0.0235053	Endothelial	1.69127	3.75053	0
IL1B	Macrophages	0.39445	0.0056263	0.0164418	0.0137511	Oogonia_meiotic	1.69086	4.28664	0
TNF	Macrophages	0.35778	0.00175557	0.0146252	0.00919502	Epithelial	1.67766	4.68909	0
CD300A	Macrophages	0.375619	0.00403993	0.0109689	0.0118044	Epithelial	1.66748	4.43928	0
AC134669.1	Macrophages	0.373637	0.00403993	0.00854271	0.011763	Supporting	1.65999	4.4428	0
APBB1IP	Macrophages	0.461843	0.0191209	0.162344	0.028372	Erythroid	1.64525	3.56235	0
TNFAIP8L2	Macrophages	0.340932	0.000972968	0.00369004	0.00807671	Endothelial	1.64287	4.81877	0
WAS	Macrophages	0.375619	0.00513981	0.0522061	0.0128813	Erythroid	1.63469	4.35198	0
EBI3	Macrophages	0.372646	0.00509751	0.0265487	0.0127778	PGC	1.62476	4.36005	0
BIN2	Macrophages	0.441031	0.0163289	0.191821	0.0252035	Oogonia_meiotic	1.62333	3.68077	0
CLEC5A	Macrophages	0.335976	0.00101527	0.00442478	0.00801458	PGC	1.62159	4.82649	0
SLC15A3	Macrophages	0.356789	0.00338424	0.0129151	0.0107689	Endothelial	1.61664	4.53109	0
GPSM3	Macrophages	0.617443	0.0636871	0.210177	0.0752584	PGC	1.59722	2.58683	0
IFITM2	Macrophages	0.397423	0.0106603	0.0464602	0.0187421	PGC	1.58055	3.97698	0
NFAM1	Macrophages	0.377602	0.00797411	0.0287611	0.0156978	PGC	1.56865	4.15423	0
CX3CR1	Macrophages	0.333994	0.00258048	0.00442478	0.00950566	PGC	1.55503	4.65587	0
BCL2A1	Macrophages	0.318137	0.000972968	0.00221239	0.00760039	PGC	1.55237	4.87956	0
GLIPR1	Macrophages	0.354807	0.00533017	0.0493601	0.0126328	Epithelial	1.55102	4.37146	0
GDA	Macrophages	0.341923	0.00382842	0.0641593	0.0108932	PGC	1.54536	4.51962	0
CSF1R	Macrophages	0.335976	0.00355345	0.0155715	0.0104997	Mesothelial	1.53084	4.55641	0
CD84	Macrophages	0.305253	0.000401878	0.00126476	0.00677201	Oogonia_meiotic	1.52472	4.99496	0
PLAUR	Macrophages	0.378593	0.0104911	0.125461	0.0181829	Endothelial	1.51712	4.00727	0
TM6SF1	Macrophages	0.503469	0.0408012	0.603321	0.0504691	Endothelial	1.50356	2.98639	0
TLR2	Macrophages	0.339941	0.00507636	0.0548446	0.0120736	Epithelial	1.50143	4.41673	0
TREM1	Macrophages	0.305253	0.000972968	0.00269451	0.00733117	Erythroid	1.50051	4.91562	0
LCN2	Macrophages	0.442022	0.0267778	0.0643314	0.0354547	Erythroid	1.47613	3.3395	0
PSTPIP1	Macrophages	0.338949	0.00643005	0.0464602	0.0133783	PGC	1.46227	4.31412	0
ASPRV1	Macrophages	0.333003	0.00558399	0.0154867	0.0124257	PGC	1.46121	4.38799	0
UNC93B1	Macrophages	0.450942	0.0309869	0.188192	0.0397623	Endothelial	1.45421	3.22484	0
CCRL2	Macrophages	0.43112	0.0260375	0.116874	0.034502	Erythroid	1.45147	3.36674	0
CLEC4D	Macrophages	0.303271	0.00207285	0.00707309	0.00836664	Erythroid	1.4507	4.7835	0
CCL4	Macrophages	0.328048	0.00543593	0.0110619	0.0121772	PGC	1.4461	4.40819	0
DOK3	Macrophages	0.326065	0.00524557	0.0206577	0.0119494	Oogonia_meiotic	1.44352	4.42708	0
VAV1	Macrophages	0.29336	0.00133254	0.0117885	0.00743471	Erythroid	1.43793	4.9016	0
CHI3L1	Macrophages	0.34886	0.00930665	0.0663717	0.0164019	PGC	1.43394	4.11036	0
RETNLB	Macrophages	0.387512	0.0184229	0.0319973	0.0261354	Erythroid	1.41228	3.64446	0
SELPLG	Macrophages	0.329039	0.00695884	0.0331858	0.013689	PGC	1.41196	4.29116	0
SNX20	Macrophages	0.391477	0.019544	0.158094	0.0273158	Oogonia_meiotic	1.40943	3.60029	0
MYO1G	Macrophages	0.280476	0.000888362	0.00738007	0.00673059	Endothelial	1.40269	5.00109	0
AIF1	Macrophages	0.291378	0.00245357	0.00553506	0.0084909	Endothelial	1.38951	4.76876	0
NLRP3	Macrophages	0.273538	0.000803757	0.00442478	0.00650279	PGC	1.37741	5.03552	0
NAPSA	Macrophages	0.277502	0.00131139	0.0329068	0.00708265	Epithelial	1.37367	4.95011	0
NCKAP1L	Macrophages	0.29336	0.00338424	0.0379427	0.00944354	Oogonia_meiotic	1.36777	4.66242	0
HCAR2	Macrophages	0.272547	0.000951817	0.00221239	0.00662704	PGC	1.36726	5.0166	0
C1QC	Macrophages	0.298315	0.00418799	0.0147601	0.010334	Endothelial	1.36399	4.57231	0
FCGR3A	Macrophages	0.26561	0.000380727	0.00221239	0.00592292	PGC	1.36229	5.12893	0
CLDN5	Endothelial	0.924354	0.00860823	0.112832	0.0188871	PGC	3.66902	3.96928	0
GIMAP6	Endothelial	0.905904	0.00829406	0.108028	0.0183693	Macrophages	3.62096	3.99707	0
CDH5	Endothelial	0.940959	0.0122526	0.0198145	0.0226769	Oogonia_meiotic	3.56286	3.78641	0
FLT1	Endothelial	0.850554	0.00668133	0.0464602	0.0161534	PGC	3.50906	4.12562	0
APLNR	Endothelial	0.784133	0.00261808	0.00663717	0.0113902	PGC	3.50899	4.475	0
MYCT1	Endothelial	0.778598	0.00245052	0.0168484	0.0111624	Macrophages	3.49995	4.4952	0
CD93	Endothelial	0.863469	0.00957168	0.120912	0.0191563	Macrophages	3.41513	3.95512	0
TIE1	Endothelial	0.739852	0.00169651	0.011893	0.00998198	Macrophages	3.40848	4.60697	0
AC142391.1	Endothelial	0.926199	0.0156037	0.0298972	0.0258248	Mesothelial	3.38658	3.65642	0
SOX17	Endothelial	0.747232	0.00282752	0.0548446	0.0111831	Epithelial	3.35758	4.49335	0
ICAM2	Endothelial	0.821033	0.00821028	0.0931615	0.0173339	Macrophages	3.32937	4.05509	0
GIMAP4	Endothelial	0.706642	0.0019269	0.0148662	0.00983702	Macrophages	3.26582	4.6216	0
RASIP1	Endothelial	0.881919	0.0171746	0.0767824	0.0268809	Epithelial	3.18932	3.61634	0
ESAM	Endothelial	0.891144	0.0201278	0.12644	0.0299045	Mesothelial	3.12769	3.50975	0
EMCN	Endothelial	0.926199	0.0275212	0.0669532	0.0376085	Mesenchymal	3.03842	3.28053	0
GIMAP1	Endothelial	0.654982	0.00397947	0.0511883	0.0112867	Epithelial	2.93702	4.48413	0
GPIHBP1	Endothelial	0.616236	0.00242957	0.00710015	0.00931928	lowQC	2.88132	4.67567	0
MFNG	Endothelial	0.675277	0.00758195	0.0901883	0.0150765	Macrophages	2.83253	4.19462	0
RASGRP3	Endothelial	0.717712	0.0123364	0.095064	0.0202539	Epithelial	2.79865	3.89941	0
TEK	Endothelial	0.643911	0.00659755	0.0176991	0.0137511	PGC	2.76021	4.28664	0
PECAM1	Endothelial	0.909594	0.0400251	0.553097	0.0497857	PGC	2.72881	3.00003	0
GIMAP1-GIMAP5	Endothelial	0.627306	0.00599016	0.024777	0.0129642	Macrophages	2.726	4.34557	0
CYYR1	Endothelial	0.590406	0.00333019	0.00663717	0.00991985	PGC	2.72367	4.61322	0
ROBO4	Endothelial	0.618081	0.00611582	0.0149318	0.0129849	Supporting	2.68493	4.34397	0
THSD1	Endothelial	0.579336	0.00341397	0.0132743	0.00987844	PGC	2.67503	4.6174	0
PTPRB	Endothelial	0.695572	0.0151011	0.0952974	0.022739	Mesothelial	2.63182	3.78367	0
ADGRL4	Endothelial	0.52583	0.00108912	0.0168484	0.0069791	Macrophages	2.61066	4.96483	0
CLEC14A	Endothelial	0.708487	0.0179286	0.0269387	0.0256798	Mesenchymal	2.59452	3.66205	0
ARHGEF15	Endothelial	0.559041	0.0038957	0.0109689	0.0101269	Epithelial	2.56742	4.59256	0
FAM167B	Endothelial	0.509225	0.00077495	0.002429	0.00648208	lowQC	2.56584	5.03871	0
PRKCH	Endothelial	0.608856	0.00856634	0.0812686	0.0153043	Macrophages	2.54479	4.17962	0
SCARF1	Endothelial	0.531365	0.00284847	0.00663717	0.00878083	PGC	2.51611	4.73518	0
SOX7	Endothelial	0.505535	0.00125668	0.00914077	0.00691698	Epithelial	2.51442	4.97378	0
TMEM255A	Endothelial	0.691882	0.0204	0.0440705	0.0279371	Mesenchymal	2.47541	3.5778	0
BCL6B	Endothelial	0.523985	0.00322547	0.00914077	0.00907076	Epithelial	2.46414	4.7027	0
FGD5	Endothelial	0.579336	0.00848256	0.0168172	0.0148901	Mesothelial	2.4373	4.20706	0
DLL4	Endothelial	0.48893	0.00180124	0.00548446	0.00726904	Epithelial	2.40756	4.92413	0
ITGA2	Endothelial	0.523985	0.00437742	0.0182815	0.0102098	Epithelial	2.40216	4.58441	0
PLVAP	Endothelial	0.693727	0.0249031	0.121681	0.0324104	PGC	2.37898	3.42928	0
EPAS1	Endothelial	0.693727	0.025699	0.050885	0.0331973	PGC	2.36234	3.40529	0
GNGT2	Endothelial	0.599631	0.0131532	0.319128	0.0197362	Macrophages	2.35373	3.9253	0
PCDH17	Endothelial	0.869004	0.0584773	0.134486	0.0675751	Oogonia_meiotic	2.34154	2.69452	0
APOLD1	Endothelial	0.708487	0.0320243	0.0607322	0.0396173	Supporting	2.28734	3.22849	0
PREX2	Endothelial	0.690037	0.0297623	0.0707965	0.0371736	PGC	2.27171	3.29216	0
FLT4	Endothelial	0.46679	0.00251335	0.0130691	0.00772465	Oogonia_meiotic	2.27016	4.86334	0
USHBP1	Endothelial	0.527675	0.00779139	0.0379427	0.0136269	Oogonia_meiotic	2.26674	4.29571	0
MMRN2	Endothelial	0.717712	0.0348728	0.0707965	0.0425373	PGC	2.26609	3.15737	0
PLXND1	Endothelial	0.802583	0.0517332	0.130531	0.0601611	PGC	2.25584	2.81073	0
KLHL4	Endothelial	0.494465	0.0050267	0.0109689	0.0105204	Epithelial	2.25201	4.55444	0
TMEM88	Endothelial	0.678967	0.0290502	0.10028	0.0363452	Mesothelial	2.25057	3.31469	0
ENG	Endothelial	0.852399	0.06275	0.14823	0.0716135	PGC	2.24732	2.63647	0
PCDH12	Endothelial	0.450185	0.00180124	0.00345057	0.00683414	Mesenchymal	2.24454	4.98582	0
ARAP3	Endothelial	0.570111	0.0138653	0.10109	0.0201089	Macrophages	2.22719	3.90659	0
FAM110D	Endothelial	0.559041	0.0130485	0.128319	0.019177	PGC	2.21047	3.95404	0
TM4SF1	Endothelial	0.677122	0.0311865	0.0890688	0.0384368	Mesothelial	2.20656	3.25874	0
GRAP	Endothelial	0.509225	0.00754006	0.197225	0.0131712	Macrophages	2.2048	4.32972	0
SHE	Endothelial	0.597786	0.018515	0.0406804	0.0250171	Mesenchymal	2.20475	3.6882	0
KDR	Endothelial	0.891144	0.0779558	0.331361	0.0870835	Mesothelial	2.17518	2.44089	0
ADGRF5	Endothelial	0.752768	0.0477118	0.177826	0.0556257	Mesothelial	2.17483	2.88911	0
FLI1	Endothelial	0.785978	0.0548749	0.373637	0.0630812	Macrophages	2.17192	2.76333	0
CD38	Endothelial	0.549815	0.0132579	0.119921	0.0192806	Macrophages	2.17103	3.94866	0
LMO2	Endothelial	0.819188	0.0630223	0.670933	0.0715099	Erythroid	2.16095	2.63792	0
PDGFB	Endothelial	0.53321	0.0122526	0.0694698	0.0181001	Epithelial	2.13915	4.01184	0
NRARP	Endothelial	0.629151	0.0267881	0.137168	0.0335494	PGC	2.1358	3.39474	0
DUSP2	Endothelial	0.618081	0.0251545	0.363726	0.0318098	Macrophages	2.13113	3.44798	0
CD34	Endothelial	0.900369	0.0886166	0.212785	0.0977282	Mesenchymal	2.09387	2.32557	0
S1PR1	Endothelial	0.702952	0.0441931	0.123885	0.0515874	Macrophages	2.08389	2.96448	0
EGFL7	Endothelial	0.96679	0.10621	0.239488	0.11587	Epithelial	2.08371	2.15529	0
AFAP1L1	Endothelial	0.616236	0.0278144	0.151737	0.0344192	Epithelial	2.07619	3.36914	0
STAB1	Endothelial	0.490775	0.00927846	0.240833	0.014683	Macrophages	2.07159	4.22106	0
RAPGEF5	Endothelial	0.684502	0.0433134	0.397133	0.0505105	Oogonia_meiotic	2.04363	2.98557	0
CDA	Endothelial	0.523985	0.0146403	0.129799	0.0203574	Epithelial	2.04056	3.89431	0
LCP1	Endothelial	0.643911	0.0354383	0.804757	0.0422681	Macrophages	2.03716	3.16372	0
PIEZO2	Endothelial	0.715867	0.0524243	0.109268	0.0598712	Mesenchymal	2.01557	2.81556	0
N4BP3	Endothelial	0.625461	0.0348728	0.10464	0.0415019	Mesothelial	1.99023	3.18202	0
CCM2L	Endothelial	0.363469	0.000649283	0.00594648	0.00472177	Macrophages	1.94658	5.35557	0
CMTM8	Endothelial	0.667897	0.0502461	0.446069	0.057179	Epithelial	1.91123	2.86157	2.60947e-314
MECOM	Endothelial	0.610701	0.0373023	0.323583	0.0437385	Epithelial	1.91121	3.12953	2.80008e-307
LYN	Endothelial	0.605166	0.0371767	0.558969	0.0435521	Macrophages	1.89647	3.1338	3.87672e-303
PTPRM	Endothelial	0.546125	0.0260551	0.0682968	0.0318926	Oogonia_meiotic	1.88161	3.44538	2.68066e-296
NOS3	Endothelial	0.435424	0.00850351	0.0597345	0.0132955	PGC	1.88118	4.32033	5.23093e-304
ARHGAP27	Endothelial	0.396679	0.00441931	0.0782953	0.00882225	Macrophages	1.87648	4.73048	9.31339e-313
KLHL6	Endothelial	0.490775	0.0167138	0.269574	0.0220349	Macrophages	1.87237	3.81513	5.09971e-295
EBF1	Endothelial	0.750923	0.077516	0.194322	0.0850747	Mesenchymal	1.85044	2.46423	2.78943e-316
COL15A1	Endothelial	0.553506	0.0300136	0.075731	0.0358896	Mesenchymal	1.84168	3.32731	2.08296e-286
C1orf115	Endothelial	0.619926	0.0455126	0.125197	0.0519602	Supporting	1.83329	2.95728	5.11963e-289
S100A16	Endothelial	0.913284	0.126945	0.312614	0.135772	Epithelial	1.82363	1.99678	0
SLCO2A1	Endothelial	0.442804	0.0116871	0.115174	0.0165262	Epithelial	1.81674	4.10281	9.71535e-285
TMEM204	Endothelial	0.559041	0.0329459	0.0782735	0.038851	Mesenchymal	1.81578	3.24802	3.78634e-280
TCIM	Endothelial	0.677122	0.0629804	0.153565	0.0698739	Epithelial	1.80186	2.66106	2.6634e-289
TM6SF1	Endothelial	0.603321	0.0441931	0.503469	0.0504691	Macrophages	1.80175	2.98639	1.11962e-279
NOVA2	Endothelial	0.365314	0.00337208	0.023766	0.00743471	Epithelial	1.79062	4.9016	5.5964e-297
ZNF366	Endothelial	0.341328	0.00150801	0.00221239	0.00532234	PGC	1.78714	5.23584	8.03095e-310
CAV1	Endothelial	0.774908	0.0939365	0.35939	0.10158	Mesothelial	1.77214	2.28691	6.73151e-304
PDE4B	Endothelial	0.54797	0.0338046	0.32111	0.0395759	Macrophages	1.76969	3.22954	2.63646e-268
ELMO1	Endothelial	0.614391	0.0501833	0.333003	0.0565162	Macrophages	1.76529	2.87323	6.44103e-272
PCDH1	Endothelial	0.439114	0.0134883	0.0730088	0.0182658	PGC	1.75765	4.00273	3.35626e-269
MYZAP	Endothelial	0.49262	0.0233323	0.0946746	0.0285998	Mesothelial	1.75095	3.55435	1.70872e-263
CLEC1A	Endothelial	0.328413	0.00123573	0.00297324	0.00490815	Macrophages	1.74613	5.31686	2.46364e-303
CD109	Endothelial	0.376384	0.00557126	0.0299325	0.00973347	Oogonia_meiotic	1.74348	4.63218	7.76854e-278
SMC1B	lowQC	0.271861	0.147898	0.999578	0.161638	Oogonia_meiotic	0.495439	1.8224	2.08572e-101
SYCP1	lowQC	0.208707	0.117946	0.990725	0.128005	Oogonia_meiotic	0.429035	2.05568	1.55299e-65
C14orf39	lowQC	0.192451	0.150017	0.971332	0.154721	Oogonia_meiotic	0.35914	1.86613	9.53907e-12
DAZ1	lowQC	0.168722	0.133481	0.993255	0.137387	Oogonia_meiotic	0.334905	1.98495	1.29903e-08
STK31	lowQC	0.137145	0.110073	0.98145	0.113074	Oogonia_meiotic	0.298937	2.17971	1.55234e-05
HORMAD1	lowQC	0.112108	0.0882264	0.924115	0.0908733	Oogonia_meiotic	0.268866	2.39829	3.69115e-05
CTSG	lowQC	0.00859492	0.00335391	0.0584737	0.00393481	Macrophages	0.0475977	5.53789	0.000549456

## Sheet: 3_mouse_Mayere2021
gene	cluster	geneFrequency	geneFrequencyOutsideCluster	geneFrequencySecondBest	geneFrequencyGlobal	secondBestClusterName	tfidf	idf	qval
NANOGP8	PGC	0.489471	0.0314066	0.0719178	0.318782	pre_spermatogonia	0.559586	1.14325	0
LEFTY1	PGC	0.423323	0.0044316	0.0239726	0.267231	pre_spermatogonia	0.558635	1.31964	0
GDF3	PGC	0.52781	0.0527938	0.0927022	0.350804	oogonia_STRA8	0.552895	1.04753	0
L1TD1	PGC	0.552415	0.0631985	0.104142	0.370118	oogonia_STRA8	0.549064	0.993934	0
HESX1	PGC	0.438087	0.0452794	0.359589	0.291715	pre_spermatogonia	0.539714	1.23198	0
ETV4	PGC	0.508469	0.0763006	0.226027	0.34743	pre_spermatogonia	0.53755	1.05719	0
PML	PGC	0.448157	0.0554913	0.0863905	0.301838	oogonia_STRA8	0.536832	1.19786	0
LHX1	PGC	0.609178	0.0863198	0.157002	0.414345	oogonia_STRA8	0.53672	0.881056	0
DUSP4	PGC	0.406271	0.0366089	0.0565068	0.268524	pre_spermatogonia	0.534172	1.31482	0
NANOS3	PGC	0.446784	0.061657	0.0911243	0.303274	oogonia_STRA8	0.533067	1.19312	0
DPPA2	PGC	0.52163	0.0899807	0.153846	0.360784	oogonia_STRA8	0.531789	1.01948	0
HEY1	PGC	0.460975	0.071869	0.22774	0.315982	pre_spermatogonia	0.531075	1.15207	0
GTSF1L	PGC	0.383268	0.0263969	0.052071	0.250287	oogonia_STRA8	0.530883	1.38515	0
ESRRB	PGC	0.407759	0.0447013	0.0765286	0.272473	oogonia_STRA8	0.530175	1.30022	0
ACTN2	PGC	0.583543	0.101927	0.371575	0.404078	pre_spermatogonia	0.528776	0.906147	0
SLC35F2	PGC	0.539368	0.100963	0.188356	0.376005	pre_spermatogonia	0.527584	0.978152	0
CPSF4L	PGC	0.456168	0.0768786	0.116438	0.314833	pre_spermatogonia	0.527199	1.15571	0
SIX4	PGC	0.547265	0.105973	0.169231	0.382826	oogonia_STRA8	0.52547	0.960175	0
AMOT	PGC	0.439345	0.0753372	0.119527	0.303705	oogonia_STRA8	0.523568	1.1917	0
LIPH	PGC	0.641337	0.106744	0.238014	0.442131	pre_spermatogonia	0.523426	0.816149	0
ABCG1	PGC	0.504463	0.101541	0.145562	0.354322	oogonia_STRA8	0.523405	1.03755	0
AL365232.1	PGC	0.37892	0.0404624	0.195205	0.2528	pre_spermatogonia	0.521074	1.37516	0
ENC1	PGC	0.52987	0.111753	0.321918	0.374067	pre_spermatogonia	0.521032	0.983321	0
CD276	PGC	0.495308	0.104046	0.19863	0.349512	pre_spermatogonia	0.520677	1.05122	0
GOT1	PGC	0.398718	0.0566474	0.166096	0.271252	pre_spermatogonia	0.52021	1.30471	0
SLC25A13	PGC	0.493591	0.105588	0.181507	0.349009	pre_spermatogonia	0.519582	1.05266	0
HK2	PGC	0.519341	0.114836	0.440068	0.36861	pre_spermatogonia	0.518311	0.998016	0
USP10	PGC	0.536164	0.120039	0.186644	0.381103	pre_spermatogonia	0.51723	0.964686	0
CDC42EP4	PGC	0.482261	0.109249	0.160947	0.343265	oogonia_STRA8	0.515659	1.06925	0
AL117348.2	PGC	0.570268	0.126782	0.337329	0.405011	pre_spermatogonia	0.515431	0.90384	0
NR5A2	PGC	0.374456	0.0472062	0.0781065	0.252513	oogonia_STRA8	0.515362	1.37629	0
HMGN5	PGC	0.571298	0.126975	0.200342	0.405729	pre_spermatogonia	0.51535	0.902069	0
PECAM1	PGC	0.594987	0.128324	0.201183	0.421094	oogonia_STRA8	0.514604	0.864899	0
HSD17B11	PGC	0.392538	0.0635838	0.27911	0.26996	pre_spermatogonia	0.514022	1.30948	0
CDH1	PGC	0.59247	0.13025	0.153846	0.420233	oogonia_STRA8	0.51364	0.866947	0
AURKB	PGC	0.402495	0.0728324	0.118343	0.279652	oogonia_STRA8	0.512862	1.27421	0
GJB3	PGC	0.650721	0.126204	0.230375	0.45527	oogonia_STRA8	0.512029	0.786865	0
PRDM1	PGC	0.55745	0.135645	0.253425	0.400273	pre_spermatogonia	0.510406	0.915609	0
PIK3CD	PGC	0.584344	0.136802	0.511986	0.417576	pre_spermatogonia	0.510301	0.873288	0
TFAP2C	PGC	0.476081	0.117726	0.210651	0.342547	oogonia_STRA8	0.510048	1.07135	0
SFXN1	PGC	0.407073	0.0834297	0.236301	0.286473	pre_spermatogonia	0.508885	1.25011	0
CDH3	PGC	0.467613	0.119075	0.129889	0.337737	oogonia_meiotic	0.507588	1.08549	0
SAPCD2	PGC	0.470016	0.120231	0.192899	0.339675	oogonia_STRA8	0.507507	1.07976	0
CTBP2	PGC	0.517853	0.135645	0.188166	0.375431	oogonia_STRA8	0.507331	0.979681	0
CDC42EP5	PGC	0.544289	0.145087	0.405822	0.395534	pre_spermatogonia	0.504838	0.927518	0
ZSWIM1	PGC	0.627718	0.144123	0.154635	0.447516	oogonia_STRA8	0.504713	0.804043	0
B4GALT1	PGC	0.467498	0.126397	0.217466	0.340393	pre_spermatogonia	0.503801	1.07765	0
MTHFD1	PGC	0.502747	0.139114	0.218935	0.367246	oogonia_STRA8	0.503613	1.00172	0
DUSP6	PGC	0.337377	0.0366089	0.135274	0.225302	pre_spermatogonia	0.502798	1.49032	0
RPP25	PGC	0.428016	0.108863	0.167808	0.30909	pre_spermatogonia	0.502543	1.17412	0
FOXR1	PGC	0.57599	0.154721	0.383562	0.419012	pre_spermatogonia	0.501028	0.869856	0
TXNRD1	PGC	0.496223	0.142967	0.219724	0.364589	oogonia_STRA8	0.500681	1.00898	0
DEDD2	PGC	0.534218	0.152023	0.339041	0.391801	pre_spermatogonia	0.500564	0.937002	0
TRIP10	PGC	0.49794	0.143931	0.342466	0.366025	pre_spermatogonia	0.500456	1.00505	0
PLCD1	PGC	0.395743	0.0921002	0.181507	0.282596	pre_spermatogonia	0.500114	1.26374	0
KCNK5	PGC	0.366331	0.0691715	0.0993151	0.2556	pre_spermatogonia	0.499727	1.36414	0
RIMBP2	PGC	0.320325	0.0267823	0.104452	0.210942	pre_spermatogonia	0.498481	1.55617	0
PRDM14	PGC	0.332227	0.0396917	0.0690335	0.223219	oogonia_STRA8	0.498208	1.4996	0
PRDX3	PGC	0.497597	0.152023	0.332192	0.368825	pre_spermatogonia	0.496319	0.997432	0
ELOVL6	PGC	0.683108	0.147784	0.318493	0.48363	pre_spermatogonia	0.496234	0.726435	0
SPRED2	PGC	0.541428	0.161657	0.273767	0.399914	oogonia_STRA8	0.496222	0.916506	0
FAM160B1	PGC	0.41474	0.113873	0.287671	0.302628	pre_spermatogonia	0.495719	1.19525	0
DNPH1	PGC	0.342184	0.0547206	0.138699	0.235066	pre_spermatogonia	0.495444	1.44789	0
CYP20A1	PGC	0.415656	0.115222	0.261986	0.303705	pre_spermatogonia	0.495337	1.1917	0
MYBL2	PGC	0.47322	0.145472	0.177909	0.351091	oogonia_STRA8	0.495324	1.04671	0
SPOUT1	PGC	0.521973	0.160308	0.18501	0.387206	oogonia_STRA8	0.495248	0.948799	0
ST3GAL2	PGC	0.483291	0.150289	0.285959	0.359204	pre_spermatogonia	0.494824	1.02386	0
PALD1	PGC	0.474708	0.147592	0.486301	0.352814	pre_spermatogonia	0.494557	1.04181	0
SCPEP1	PGC	0.462348	0.142967	0.231164	0.343337	pre_spermatogonia	0.49427	1.06904	0
GLT1D1	PGC	0.340124	0.055684	0.095858	0.234133	oogonia_STRA8	0.493814	1.45187	0
HBZ	PGC	0.420691	0.123892	0.233531	0.310095	oogonia_STRA8	0.492578	1.17088	2.67907e-319
SURF6	PGC	0.489357	0.157033	0.273973	0.365523	pre_spermatogonia	0.492502	1.00643	0
TBRG4	PGC	0.562715	0.171484	0.241438	0.41693	pre_spermatogonia	0.492284	0.874837	0
SOX15	PGC	0.317693	0.0352601	0.0839041	0.21245	pre_spermatogonia	0.492122	1.54905	0
OOEP	PGC	0.55436	0.171484	0.253425	0.411689	pre_spermatogonia	0.491988	0.887488	0
BLNK	PGC	0.329252	0.0481696	0.277397	0.224512	pre_spermatogonia	0.491845	1.49383	0
PLA2G10	PGC	0.525063	0.168208	0.44863	0.392088	pre_spermatogonia	0.4916	0.936269	0
SIGMAR1	PGC	0.490501	0.160308	0.251712	0.367461	pre_spermatogonia	0.491059	1.00114	0
WNT3	PGC	0.342412	0.0631985	0.282534	0.238369	pre_spermatogonia	0.490998	1.43394	0
SHMT2	PGC	0.449645	0.144701	0.347603	0.336014	pre_spermatogonia	0.490384	1.0906	3.31691e-319
PLEKHG3	PGC	0.451362	0.14605	0.269034	0.337593	oogonia_STRA8	0.49014	1.08591	5.4114e-319
E2F3	PGC	0.534791	0.173025	0.23432	0.399986	oogonia_STRA8	0.490043	0.916327	0
UTP15	PGC	0.463493	0.152408	0.27911	0.347573	pre_spermatogonia	0.48981	1.05678	0
C2orf88	PGC	0.349165	0.0720617	0.184932	0.245908	pre_spermatogonia	0.489808	1.4028	0
GCNT2	PGC	0.351453	0.0743738	0.188356	0.248205	pre_spermatogonia	0.48975	1.3935	0
F11R	PGC	0.61696	0.176301	0.460616	0.452757	pre_spermatogonia	0.488879	0.7924	0
GLIS3	PGC	0.476768	0.160308	0.246943	0.358845	oogonia_STRA8	0.488622	1.02486	0
MNT	PGC	0.392653	0.112331	0.181507	0.288196	pre_spermatogonia	0.488504	1.24411	3.97286e-299
FGFR2	PGC	0.32742	0.0524085	0.077712	0.224943	oogonia_STRA8	0.488482	1.49191	0
GRAMD2B	PGC	0.400549	0.119075	0.224315	0.295663	pre_spermatogonia	0.488083	1.21853	1.13804e-295
GLRX	PGC	0.546349	0.178805	0.312821	0.409391	oogonia_STRA8	0.487936	0.893084	0
SMIM40	PGC	0.564431	0.180732	0.708904	0.421453	pre_spermatogonia	0.487695	0.864047	0
IGFBPL1	PGC	0.436599	0.143353	0.565068	0.327326	pre_spermatogonia	0.487593	1.1168	3.68995e-299
PUS7	PGC	0.47013	0.160308	0.457192	0.354681	pre_spermatogonia	0.487307	1.03654	1.36223e-318
BMP4	PGC	0.327649	0.055106	0.212329	0.226091	pre_spermatogonia	0.487154	1.48682	0
KLF16	PGC	0.399062	0.119846	0.316781	0.295017	pre_spermatogonia	0.487143	1.22072	4.12472e-291
PDLIM1	PGC	0.619135	0.179961	0.363014	0.455485	pre_spermatogonia	0.486882	0.786392	0
BZW2	PGC	0.533303	0.179961	0.513699	0.401637	pre_spermatogonia	0.486482	0.912207	0
TPD52L1	PGC	0.512131	0.176493	0.402397	0.387062	pre_spermatogonia	0.486099	0.94917	0
UBQLN4	PGC	0.544518	0.182466	0.304795	0.409607	pre_spermatogonia	0.486014	0.892558	0
STRA8	oogonia_STRA8	0.993688	0.212499	0.2607	0.354681	PGC	1.02999	1.03654	0
MADD	oogonia_STRA8	0.771992	0.154042	0.308219	0.266513	pre_spermatogonia	1.02083	1.32233	0
M1AP	oogonia_STRA8	0.765286	0.167471	0.241912	0.276278	oogonia_meiotic	0.984424	1.28635	0
REC8	oogonia_STRA8	0.76568	0.172123	0.354452	0.280155	pre_spermatogonia	0.974261	1.27241	0
DMRTC2	oogonia_STRA8	0.695069	0.163258	0.520548	0.260052	pre_spermatogonia	0.936171	1.34687	0
MEIOC	oogonia_STRA8	0.954241	0.24989	0.487204	0.378087	oogonia_meiotic	0.928123	0.97263	0
IHO1	oogonia_STRA8	0.461144	0.0678487	0.164384	0.139431	pre_spermatogonia	0.908538	1.97018	0
UGT8	oogonia_STRA8	0.661144	0.164048	0.216803	0.254523	oogonia_meiotic	0.904685	1.36836	0
SPDYA	oogonia_STRA8	0.595266	0.137628	0.380975	0.220922	oogonia_meiotic	0.89882	1.50995	0
MSX1	oogonia_STRA8	0.710848	0.188274	0.229	0.283386	PGC	0.896341	1.26095	0
DDB2	oogonia_STRA8	0.583826	0.136663	0.206663	0.21805	oogonia_meiotic	0.889186	1.52303	0
FGF11	oogonia_STRA8	0.350296	0.0244887	0.0753425	0.0837881	pre_spermatogonia	0.868546	2.47946	0
LYPD4	oogonia_STRA8	0.396055	0.0565259	0.568493	0.118323	pre_spermatogonia	0.845316	2.13434	0
INCA1	oogonia_STRA8	0.521893	0.126569	0.524384	0.198521	oogonia_meiotic	0.843829	1.61686	0
DIP2C	oogonia_STRA8	0.505325	0.121917	0.244326	0.1917	oogonia_meiotic	0.834708	1.65182	0
DMC1	oogonia_STRA8	0.562525	0.152374	0.293578	0.227025	oogonia_meiotic	0.834053	1.4827	0
CITED1	oogonia_STRA8	0.861538	0.279119	0.597603	0.385123	pre_spermatogonia	0.822072	0.954191	0
LAMB2	oogonia_STRA8	0.421302	0.0800492	0.153066	0.14216	oogonia_meiotic	0.821877	1.9508	0
CYLD	oogonia_STRA8	0.674556	0.212236	0.265572	0.296381	oogonia_meiotic	0.820333	1.21611	0
ACER3	oogonia_STRA8	0.650888	0.207671	0.228392	0.28834	oogonia_meiotic	0.809453	1.24361	0
PDE6D	oogonia_STRA8	0.571992	0.170982	0.194667	0.243969	PGC	0.806917	1.41071	0
AC136616.1	oogonia_STRA8	0.423669	0.0883876	0.116438	0.149411	pre_spermatogonia	0.805416	1.90105	0
ANKRD29	oogonia_STRA8	0.486391	0.12613	0.546233	0.1917	pre_spermatogonia	0.803431	1.65182	7.01369e-318
ZNF672	oogonia_STRA8	0.4643	0.113579	0.327378	0.177412	oogonia_meiotic	0.802904	1.72928	1.01599e-315
FAM83G	oogonia_STRA8	0.523471	0.148512	0.212458	0.216758	oogonia_meiotic	0.800375	1.52898	0
RHOXF1	oogonia_STRA8	0.678501	0.225665	0.470304	0.308084	oogonia_meiotic	0.798854	1.17738	0
TRANK1	oogonia_STRA8	0.531755	0.154832	0.542808	0.223435	pre_spermatogonia	0.796908	1.49864	2.91716e-319
CCND1	oogonia_STRA8	0.753057	0.264285	0.315404	0.353245	PGC	0.783626	1.04059	0
TERB2	oogonia_STRA8	0.519132	0.155359	0.228392	0.221568	oogonia_meiotic	0.782345	1.50703	1.24768e-299
MEIOB	oogonia_STRA8	0.442998	0.115861	0.377113	0.175402	oogonia_meiotic	0.771115	1.74067	2.27872e-278
CCNE2	oogonia_STRA8	0.647732	0.230054	0.371318	0.306074	oogonia_meiotic	0.766868	1.18393	0
PRDM7	oogonia_STRA8	0.347535	0.0597735	0.226944	0.112148	oogonia_meiotic	0.760383	2.18793	9.49777e-292
TESMIN	oogonia_STRA8	0.420907	0.109014	0.176726	0.165781	oogonia_meiotic	0.756407	1.79709	5.16109e-263
PDE3B	oogonia_STRA8	0.521893	0.171333	0.171778	0.235138	PGC	0.755484	1.44758	8.68316e-271
C5orf47	oogonia_STRA8	0.342406	0.0590714	0.276678	0.11064	oogonia_meiotic	0.753797	2.20147	4.70559e-286
NMB	oogonia_STRA8	0.629191	0.229	0.609589	0.301838	pre_spermatogonia	0.753686	1.19786	6.87421e-316
TSC22D3	oogonia_STRA8	0.768836	0.290266	0.788025	0.377369	oogonia_meiotic	0.749255	0.974531	0
PDIK1L	oogonia_STRA8	0.518343	0.175283	0.201835	0.237723	oogonia_meiotic	0.744678	1.43665	2.66237e-258
SCT	oogonia_STRA8	0.619724	0.232862	0.335616	0.303274	pre_spermatogonia	0.739404	1.19312	6.58018e-295
ZNF398	oogonia_STRA8	0.487968	0.161327	0.181555	0.220778	oogonia_meiotic	0.737123	1.5106	5.398e-244
SLC25A42	oogonia_STRA8	0.3286	0.0591591	0.0890411	0.108199	pre_spermatogonia	0.730733	2.22378	2.5334e-264
TERB1	oogonia_STRA8	0.389349	0.101027	0.431193	0.153504	oogonia_meiotic	0.729652	1.87403	8.5983e-238
SYT14	oogonia_STRA8	0.406312	0.115948	0.143836	0.168797	pre_spermatogonia	0.722853	1.77906	3.58205e-227
NRTN	oogonia_STRA8	0.705325	0.283946	0.308219	0.36064	pre_spermatogonia	0.719343	1.01987	0
MYL7	oogonia_STRA8	0.462327	0.155095	0.335616	0.211014	pre_spermatogonia	0.719304	1.55583	2.97147e-222
TOP2B	oogonia_STRA8	0.77002	0.310629	0.327192	0.394242	PGC	0.716727	0.930791	0
GINS3	oogonia_STRA8	0.444181	0.145001	0.16434	0.199454	PGC	0.716096	1.61217	5.54891e-218
FIGLA	oogonia_STRA8	0.499014	0.184763	0.779334	0.241959	oogonia_meiotic	0.708095	1.41899	3.21923e-216
RAPGEFL1	oogonia_STRA8	0.32071	0.0631089	0.166096	0.109994	pre_spermatogonia	0.707912	2.20733	3.2705e-240
YIPF6	oogonia_STRA8	0.666667	0.274642	0.301304	0.345994	oogonia_meiotic	0.707557	1.06133	1.21249e-291
HLA-DQB1	oogonia_STRA8	0.299014	0.0484508	0.316781	0.0940551	pre_spermatogonia	0.706831	2.36387	7.74765e-255
SIRT7	oogonia_STRA8	0.515187	0.196524	0.289384	0.254523	pre_spermatogonia	0.704963	1.36836	8.75672e-217
IQSEC1	oogonia_STRA8	0.60789	0.248398	0.460616	0.313828	pre_spermatogonia	0.704489	1.15891	3.72865e-252
BAZ1A	oogonia_STRA8	0.68284	0.285702	0.550459	0.357984	oogonia_meiotic	0.701459	1.02727	3.1928e-297
PDLIM5	oogonia_STRA8	0.509665	0.196085	0.207828	0.253159	PGC	0.700145	1.37374	1.1315e-210
GPX3	oogonia_STRA8	0.449704	0.158255	0.530822	0.211301	pre_spermatogonia	0.699052	1.55447	8.82403e-201
HFM1	oogonia_STRA8	0.490335	0.185201	0.421535	0.240738	oogonia_meiotic	0.69826	1.42405	8.92862e-205
DIPK1B	oogonia_STRA8	0.491124	0.188098	0.589041	0.243251	pre_spermatogonia	0.694283	1.41366	5.13541e-201
CEP170B	oogonia_STRA8	0.743984	0.315983	0.411878	0.393883	oogonia_meiotic	0.693171	0.931702	0
EAF2	oogonia_STRA8	0.323077	0.0716229	0.196918	0.117389	pre_spermatogonia	0.692114	2.14226	1.634e-219
PBX3	oogonia_STRA8	0.624458	0.266918	0.383873	0.331993	oogonia_meiotic	0.688553	1.10264	3.30896e-245
FKBPL	oogonia_STRA8	0.478107	0.183446	0.269435	0.237076	oogonia_meiotic	0.688174	1.43937	6.35267e-193
PDE8A	oogonia_STRA8	0.439842	0.158167	0.170977	0.209434	PGC	0.687625	1.56335	5.08221e-189
GATA2	oogonia_STRA8	0.705325	0.30668	0.359579	0.379236	PGC	0.683881	0.969596	7.42056e-297
DNAJC18	oogonia_STRA8	0.526233	0.21759	0.292808	0.273765	pre_spermatogonia	0.681727	1.29548	3.97391e-197
TCHH	oogonia_STRA8	0.307298	0.0646888	0.296233	0.108845	pre_spermatogonia	0.681533	2.21783	2.55345e-216
DNAH8	oogonia_STRA8	0.378698	0.118143	0.231164	0.165566	pre_spermatogonia	0.681046	1.79839	2.61289e-187
MINDY2	oogonia_STRA8	0.458777	0.175722	0.503425	0.22724	pre_spermatogonia	0.679792	1.48175	1.52511e-182
GCHFR	oogonia_STRA8	0.600789	0.261827	0.554795	0.323521	pre_spermatogonia	0.677985	1.12849	2.53217e-222
RAD51AP2	oogonia_STRA8	0.289152	0.0531906	0.214041	0.0961373	pre_spermatogonia	0.677187	2.34198	3.3695e-224
PAPOLG	oogonia_STRA8	0.513215	0.212938	0.228199	0.26759	PGC	0.67657	1.3183	8.72108e-189
RGS10	oogonia_STRA8	0.539645	0.230317	0.364726	0.286617	pre_spermatogonia	0.674345	1.24961	3.58318e-194
SPRYD3	oogonia_STRA8	0.411045	0.146493	0.220666	0.194644	oogonia_meiotic	0.67271	1.63658	7.43214e-175
GAMT	oogonia_STRA8	0.549507	0.237426	0.283818	0.294227	PGC	0.672268	1.2234	1.72834e-195
HORMAD2	oogonia_STRA8	0.613018	0.272448	0.304189	0.334434	PGC	0.671448	1.09532	3.34458e-222
DUSP16	oogonia_STRA8	0.508876	0.213991	0.246741	0.267662	oogonia_meiotic	0.670713	1.31803	3.04597e-182
TSPYL2	oogonia_STRA8	0.551085	0.239445	0.363014	0.296166	pre_spermatogonia	0.670579	1.21684	1.89677e-194
NKD1	oogonia_STRA8	0.547929	0.237778	0.382424	0.294227	oogonia_meiotic	0.670338	1.2234	3.89812e-193
NPW	oogonia_STRA8	0.581854	0.257965	0.597603	0.316916	pre_spermatogonia	0.66862	1.14912	1.22636e-204
FAM72B	oogonia_STRA8	0.420118	0.159396	0.299658	0.20685	pre_spermatogonia	0.662007	1.57576	3.32344e-164
ZNF397	oogonia_STRA8	0.458383	0.189941	0.401738	0.2388	oogonia_meiotic	0.656464	1.43213	1.18792e-160
ATP11C	oogonia_STRA8	0.597633	0.274906	0.378078	0.333644	oogonia_meiotic	0.65601	1.09768	6.80578e-200
SSH2	oogonia_STRA8	0.60355	0.278065	0.660959	0.337306	pre_spermatogonia	0.655917	1.08676	1.22617e-202
REL	oogonia_STRA8	0.514004	0.226894	0.291096	0.27915	pre_spermatogonia	0.655872	1.27601	8.06082e-170
CLCN5	oogonia_STRA8	0.545957	0.246292	0.258869	0.300833	PGC	0.655803	1.2012	5.00857e-179
FGFR3	oogonia_STRA8	0.413807	0.158694	0.191691	0.205126	PGC	0.655523	1.58413	2.64908e-158
TMEM129	oogonia_STRA8	0.36568	0.122531	0.138699	0.166786	pre_spermatogonia	0.654949	1.79104	1.30855e-163
SLC35F5	oogonia_STRA8	0.525444	0.234969	0.244326	0.287837	oogonia_meiotic	0.654366	1.24536	1.84393e-171
ARMC8	oogonia_STRA8	0.586193	0.270429	0.302358	0.327901	PGC	0.653632	1.11504	1.7301e-192
GARNL3	oogonia_STRA8	0.35503	0.115597	0.309932	0.159176	pre_spermatogonia	0.652454	1.83775	1.12871e-163
ECSIT	oogonia_STRA8	0.637081	0.298078	0.347603	0.359779	pre_spermatogonia	0.651266	1.02227	3.67108e-216
FLYWCH2	oogonia_STRA8	0.452071	0.190643	0.39726	0.238225	pre_spermatogonia	0.648513	1.43454	6.93416e-153
ANKRD31	oogonia_STRA8	0.424852	0.171333	0.43071	0.217476	oogonia_meiotic	0.648183	1.52567	2.30106e-151
FUT8	oogonia_STRA8	0.693097	0.328008	0.42395	0.394457	oogonia_meiotic	0.644749	0.930245	3.30104e-247
RALGAPA2	oogonia_STRA8	0.575542	0.271044	0.366438	0.326465	pre_spermatogonia	0.644281	1.11943	1.95657e-179
BEND2	oogonia_STRA8	0.672189	0.319933	0.520548	0.384047	pre_spermatogonia	0.64328	0.956992	1.11565e-230
MMP24OS	oogonia_STRA8	0.371598	0.134293	0.151179	0.177484	PGC	0.642445	1.72887	2.32858e-150
ZNF541	oogonia_STRA8	0.359763	0.126306	0.568324	0.168797	oogonia_meiotic	0.640041	1.77906	2.16891e-150
ADARB1	oogonia_STRA8	0.514398	0.237865	0.361301	0.288196	pre_spermatogonia	0.63997	1.24411	9.79868e-156
FAM189B	oogonia_STRA8	0.495069	0.227157	0.308219	0.275919	pre_spermatogonia	0.637475	1.28765	2.90861e-149
MORN5	oogonia_meiotic	0.597296	0.0203255	0.234589	0.106117	pre_spermatogonia	1.33986	2.24321	0
CCNB3	oogonia_meiotic	0.557702	0.0541452	0.148323	0.129021	oogonia_STRA8	1.14205	2.04778	0
LHX8	oogonia_meiotic	0.480927	0.0301088	0.0650685	0.0971424	pre_spermatogonia	1.12132	2.33158	0
RNF212	oogonia_meiotic	0.637373	0.0953867	0.553082	0.175976	pre_spermatogonia	1.10738	1.73741	0
FIGLA	oogonia_meiotic	0.779334	0.148098	0.499014	0.241959	oogonia_STRA8	1.10587	1.41899	0
SPATA33	oogonia_meiotic	0.570256	0.0796154	0.1357	0.15257	oogonia_STRA8	1.07215	1.88013	0
TKTL1	oogonia_meiotic	0.674553	0.13064	0.482877	0.211516	pre_spermatogonia	1.04789	1.55345	0
DCAF8L2	oogonia_meiotic	0.788508	0.174918	0.635274	0.266155	pre_spermatogonia	1.04373	1.32368	0
SOHLH1	oogonia_meiotic	0.523901	0.0740491	0.902397	0.140939	pre_spermatogonia	1.02655	1.95943	0
ZNF541	oogonia_meiotic	0.568324	0.0990132	0.359763	0.168797	oogonia_STRA8	1.01108	1.77906	0
SSMEM1	oogonia_meiotic	0.407533	0.0361812	0.101027	0.0913986	pre_spermatogonia	0.975032	2.39252	0
TDRD9	oogonia_meiotic	0.548527	0.106941	0.888699	0.172602	pre_spermatogonia	0.963635	1.75677	0
GC	oogonia_meiotic	0.32931	0.00792781	0.0770548	0.0557151	pre_spermatogonia	0.950883	2.8875	0
FAM229B	oogonia_meiotic	0.715113	0.188581	0.503425	0.266872	pre_spermatogonia	0.944654	1.32098	0
PRPS1	oogonia_meiotic	0.527282	0.106435	0.191781	0.169012	pre_spermatogonia	0.937393	1.77779	0
MAOA	oogonia_meiotic	0.742154	0.20781	0.329389	0.287263	oogonia_STRA8	0.92573	1.24736	0
CCDC201	oogonia_meiotic	0.317721	0.0083495	0.0941781	0.0543509	pre_spermatogonia	0.925296	2.91229	0
PRDM16	oogonia_meiotic	0.382907	0.0387956	0.443493	0.0899627	pre_spermatogonia	0.922178	2.40836	0
CCDC122	oogonia_meiotic	0.453404	0.0831576	0.259566	0.138211	oogonia_STRA8	0.897276	1.97898	0
ASPA	oogonia_meiotic	0.344278	0.0275786	0.171233	0.0746697	pre_spermatogonia	0.893292	2.59468	0
NME5	oogonia_meiotic	0.364075	0.0417475	0.265411	0.0896755	pre_spermatogonia	0.877989	2.41156	0
JOSD2	oogonia_meiotic	0.778851	0.249304	0.315582	0.328044	oogonia_STRA8	0.868112	1.11461	0
CDKL2	oogonia_meiotic	0.534042	0.139749	0.326233	0.198377	oogonia_STRA8	0.863857	1.61758	1.66523e-308
MAP10	oogonia_meiotic	0.367938	0.0480729	0.0781065	0.0956347	oogonia_STRA8	0.863632	2.34722	0
INCA1	oogonia_meiotic	0.524384	0.141604	0.521893	0.198521	oogonia_STRA8	0.847856	1.61686	1.77824e-291
MYOM3	oogonia_meiotic	0.282955	0.00961457	0.101027	0.0502585	pre_spermatogonia	0.846199	2.99058	0
GAB3	oogonia_meiotic	0.472718	0.113857	0.285959	0.167217	pre_spermatogonia	0.845439	1.78846	7.44426e-283
TAF7L	oogonia_meiotic	0.554804	0.161171	0.420513	0.219701	oogonia_STRA8	0.840799	1.51549	1.51495e-292
CCDC173	oogonia_meiotic	0.464027	0.112339	0.27226	0.164632	pre_spermatogonia	0.837123	1.80404	1.01742e-274
NOBOX	oogonia_meiotic	0.277644	0.0150966	0.109589	0.0541356	pre_spermatogonia	0.809682	2.91626	0
TERB1	oogonia_meiotic	0.431193	0.105001	0.389349	0.153504	oogonia_STRA8	0.808068	1.87403	2.07421e-248
WDPCP	oogonia_meiotic	0.323032	0.0409041	0.172945	0.0828547	pre_spermatogonia	0.804566	2.49067	2.63215e-282
RIBC1	oogonia_meiotic	0.524384	0.163532	0.239842	0.217188	oogonia_STRA8	0.80073	1.52699	5.46691e-249
IL18	oogonia_meiotic	0.337035	0.0522898	0.368151	0.0946295	pre_spermatogonia	0.794657	2.35779	2.85287e-262
C4orf47	oogonia_meiotic	0.352004	0.0646032	0.344178	0.107338	pre_spermatogonia	0.785593	2.23177	1.95017e-245
LY6K	oogonia_meiotic	0.353452	0.0662056	0.409247	0.108917	pre_spermatogonia	0.783663	2.21717	7.03061e-243
TSC22D3	oogonia_meiotic	0.788025	0.305642	0.768836	0.377369	oogonia_STRA8	0.767955	0.974531	0
TAF9B	oogonia_meiotic	0.449058	0.134098	0.335616	0.18093	pre_spermatogonia	0.767729	1.70964	1.29065e-211
DNAJA4	oogonia_meiotic	0.35973	0.0775913	0.232877	0.119543	pre_spermatogonia	0.764093	2.12408	3.06047e-221
PODXL2	oogonia_meiotic	0.418155	0.11858	0.703767	0.163125	pre_spermatogonia	0.758217	1.81324	2.35371e-204
CCDC177	oogonia_meiotic	0.260744	0.0234461	0.060355	0.0587306	oogonia_STRA8	0.739154	2.83479	9.58187e-263
CCDC73	oogonia_meiotic	0.757605	0.310871	0.576331	0.377298	oogonia_STRA8	0.738454	0.974721	1.23728e-318
C6orf120	oogonia_meiotic	0.233221	0.00986759	0.010274	0.0430787	pre_spermatogonia	0.733415	3.14473	5.86467e-300
C17orf64	oogonia_meiotic	0.258329	0.0241208	0.0753425	0.058946	pre_spermatogonia	0.731365	2.83113	9.24532e-256
ZPBP	oogonia_meiotic	0.266055	0.0296028	0.052071	0.0647616	oogonia_STRA8	0.728204	2.73704	6.54675e-243
C11orf49	oogonia_meiotic	0.359247	0.0923505	0.10572	0.132036	oogonia_STRA8	0.727359	2.02468	2.21642e-187
RSPH3	oogonia_meiotic	0.310961	0.0601333	0.104452	0.0974296	pre_spermatogonia	0.724111	2.32862	1.0858e-203
RNF212B	oogonia_meiotic	0.575085	0.236738	0.460355	0.287048	oogonia_STRA8	0.717767	1.24811	1.17734e-194
TET3	oogonia_meiotic	0.353452	0.0981699	0.501712	0.136129	pre_spermatogonia	0.704839	1.99415	3.08935e-169
OR52E5	oogonia_meiotic	0.201835	0.00185544	0.00684932	0.031591	pre_spermatogonia	0.697316	3.45488	0
GRK4	oogonia_meiotic	0.303718	0.0657839	0.201972	0.101163	oogonia_STRA8	0.695824	2.29102	2.96167e-180
ZNF711	oogonia_meiotic	0.408015	0.147002	0.368047	0.185813	oogonia_STRA8	0.686696	1.68302	3.3912e-146
POLN	oogonia_meiotic	0.283921	0.056085	0.122288	0.0899627	oogonia_STRA8	0.683784	2.40836	3.27539e-180
CCNO	oogonia_meiotic	0.280058	0.0554103	0.145548	0.0888139	pre_spermatogonia	0.67808	2.42121	3.5464e-177
TOPAZ1	oogonia_meiotic	0.577016	0.263136	0.782534	0.309808	pre_spermatogonia	0.67615	1.1718	1.59481e-163
SYCP2	oogonia_meiotic	0.727668	0.339546	0.610651	0.397257	oogonia_STRA8	0.671762	0.923171	7.17835e-238
MRC1	oogonia_meiotic	0.200386	0.00683141	0.0565068	0.0356117	pre_spermatogonia	0.668304	3.33508	2.42859e-268
SYT11	oogonia_meiotic	0.434573	0.176942	0.267123	0.21525	pre_spermatogonia	0.667484	1.53596	1.82608e-131
UGGT2	oogonia_meiotic	0.438436	0.181327	0.308481	0.219558	oogonia_STRA8	0.66473	1.51614	1.40025e-129
NPTX2	oogonia_meiotic	0.423467	0.171291	0.292808	0.208788	pre_spermatogonia	0.663334	1.56644	2.60953e-128
LRRC6	oogonia_meiotic	0.226944	0.0237834	0.0808679	0.053992	oogonia_STRA8	0.66243	2.91892	4.70987e-210
TSGA10	oogonia_meiotic	0.252052	0.0415788	0.0579882	0.0728748	oogonia_STRA8	0.660128	2.61901	2.06899e-180
STYXL1	oogonia_meiotic	0.226944	0.0250485	0.188356	0.0550689	pre_spermatogonia	0.657948	2.89917	1.23693e-204
ANKRD31	oogonia_meiotic	0.43071	0.180231	0.424852	0.217476	oogonia_STRA8	0.65712	1.52567	6.54623e-124
MAGEB2	oogonia_meiotic	0.334621	0.106435	0.695205	0.140365	pre_spermatogonia	0.657032	1.96351	1.02009e-134
IFT22	oogonia_meiotic	0.556736	0.263726	0.293886	0.307295	oogonia_STRA8	0.656919	1.17995	2.69444e-143
MEIOB	oogonia_meiotic	0.377113	0.14017	0.442998	0.175402	oogonia_STRA8	0.65643	1.74067	5.35843e-126
TBC1D12	oogonia_meiotic	0.32931	0.10458	0.142012	0.137995	oogonia_STRA8	0.652209	1.98053	2.25659e-132
SNAP91	oogonia_meiotic	0.300821	0.0843384	0.392123	0.116528	pre_spermatogonia	0.646652	2.14962	7.03576e-138
EFCAB2	oogonia_meiotic	0.807339	0.387113	0.545562	0.449598	oogonia_STRA8	0.645388	0.799402	6.52665e-284
STARD6	oogonia_meiotic	0.236601	0.0359281	0.174658	0.0657668	pre_spermatogonia	0.643942	2.72164	6.87576e-178
FOCAD	oogonia_meiotic	0.407533	0.171797	0.263511	0.20685	oogonia_STRA8	0.642175	1.57576	1.76462e-113
TSBP1	oogonia_meiotic	0.270884	0.0625791	0.25641	0.0935526	oogonia_STRA8	0.641786	2.36923	7.21711e-149
CFAP410	oogonia_meiotic	0.213906	0.0215063	0.0530822	0.0501149	pre_spermatogonia	0.640315	2.99344	5.50308e-201
CHADL	oogonia_meiotic	0.327378	0.109134	0.266272	0.141585	oogonia_STRA8	0.639976	1.95485	2.57065e-123
GRID2	oogonia_meiotic	0.175761	0.000759045	0.0119863	0.0267806	pre_spermatogonia	0.636267	3.62008	5.21754e-295
TEX15	oogonia_meiotic	0.756639	0.376992	0.885274	0.433443	pre_spermatogonia	0.632546	0.835994	7.71563e-228
CTAG1A	oogonia_meiotic	0.57605	0.291473	0.518343	0.333788	oogonia_STRA8	0.632071	1.09725	1.04831e-131
TSHZ1	oogonia_meiotic	0.377595	0.154677	0.198422	0.187823	oogonia_STRA8	0.631436	1.67225	7.44385e-108
SMIM19	oogonia_meiotic	0.621922	0.317956	0.442209	0.363153	oogonia_STRA8	0.629963	1.01293	7.36589e-147
MAPRE3	oogonia_meiotic	0.337518	0.123724	0.284247	0.155514	pre_spermatogonia	0.628128	1.86102	7.77394e-112
PACRG	oogonia_meiotic	0.255915	0.0580248	0.496575	0.0874497	pre_spermatogonia	0.623586	2.43669	5.72378e-142
GTSF1	oogonia_meiotic	0.699662	0.360884	0.97774	0.411258	pre_spermatogonia	0.621674	0.888535	6.72749e-180
STK33	oogonia_meiotic	0.243844	0.0511934	0.172781	0.0798392	oogonia_STRA8	0.616373	2.52774	5.39125e-144
DYNC2H1	oogonia_meiotic	0.475616	0.239268	0.546233	0.274411	pre_spermatogonia	0.615032	1.29313	8.74248e-99
YBX2	oogonia_meiotic	0.631579	0.334486	0.502564	0.378662	oogonia_STRA8	0.613334	0.971112	3.24294e-139
SPO11	oogonia_meiotic	0.347658	0.140676	0.32363	0.171453	pre_spermatogonia	0.613076	1.76345	4.60624e-99
PDCL2	oogonia_meiotic	0.199903	0.0199039	0.0376712	0.0466686	pre_spermatogonia	0.612641	3.06468	1.2353e-187
SOX30	oogonia_meiotic	0.312892	0.112339	0.215385	0.14216	oogonia_STRA8	0.610392	1.9508	4.53079e-105
C5orf47	oogonia_meiotic	0.276678	0.0816395	0.342406	0.11064	oogonia_STRA8	0.609098	2.20147	9.37652e-118
CELF4	oogonia_meiotic	0.324481	0.123387	0.410959	0.153288	pre_spermatogonia	0.608543	1.87543	1.25097e-100
COQ8A	oogonia_meiotic	0.495413	0.257401	0.302959	0.292791	oogonia_STRA8	0.608513	1.22829	2.22148e-97
ANGPTL6	oogonia_meiotic	0.492033	0.257148	0.361301	0.292074	pre_spermatogonia	0.605569	1.23075	5.25988e-95
ZNF23	oogonia_meiotic	0.328344	0.128447	0.235897	0.158171	oogonia_STRA8	0.605493	1.84408	1.43331e-97
CLIP4	oogonia_meiotic	0.403187	0.191954	0.311644	0.223363	pre_spermatogonia	0.60436	1.49896	2.81486e-88
TMCC3	oogonia_meiotic	0.40705	0.195834	0.315068	0.22724	pre_spermatogonia	0.603145	1.48175	1.87371e-87
FAM240B	oogonia_meiotic	0.191695	0.0173737	0.0536489	0.0432941	oogonia_STRA8	0.601872	3.13974	2.42707e-187
LAMTOR3	oogonia_meiotic	0.32593	0.129291	0.207192	0.15853	pre_spermatogonia	0.600302	1.84181	1.77478e-94
HFM1	oogonia_meiotic	0.421535	0.209159	0.490335	0.240738	oogonia_STRA8	0.600286	1.42405	1.01755e-85
CFAP54	oogonia_meiotic	0.181072	0.0115544	0.107877	0.0367605	pre_spermatogonia	0.598141	3.30333	1.98382e-202
FP565260.4	pre_spermatogonia	0.953767	0.0184353	0.027924	0.0576536	PGC	2.72139	2.8533	0
AFP	pre_spermatogonia	0.943493	0.0229317	0.0325017	0.0615307	PGC	2.63067	2.78822	0
SPOCD1	pre_spermatogonia	0.820205	0.00959233	0.0146487	0.0435813	PGC	2.56981	3.13313	0
MYO1A	pre_spermatogonia	0.821918	0.0106415	0.0207629	0.0446582	oogonia_meiotic	2.55511	3.10872	0
CCDC113	pre_spermatogonia	0.868151	0.0221823	0.0357315	0.0576536	oogonia_meiotic	2.4771	2.8533	0
FAM183A	pre_spermatogonia	0.765411	0.00756894	0.00961318	0.0393452	PGC	2.4764	3.23538	0
NME8	pre_spermatogonia	0.767123	0.00786871	0.0105287	0.0397042	PGC	2.47497	3.2263	0
AC020765.6	pre_spermatogonia	0.804795	0.0147632	0.0165942	0.0478891	PGC	2.44566	3.03887	0
SPACA9	pre_spermatogonia	0.854452	0.0245803	0.0386588	0.0593768	oogonia_STRA8	2.41285	2.82385	0
TEKT1	pre_spermatogonia	0.696918	0.0119155	0.0169375	0.0406376	PGC	2.23227	3.20306	0
DSCAML1	pre_spermatogonia	0.77911	0.03125	0.0423438	0.0626077	PGC	2.15881	2.77087	0
SYCE1L	pre_spermatogonia	0.65411	0.0105665	0.0133898	0.0375503	PGC	2.14684	3.28208	0
C3	pre_spermatogonia	0.59589	0.00247302	0.00366217	0.027355	PGC	2.14452	3.59886	0
PLAC8	pre_spermatogonia	0.943493	0.0668465	0.092813	0.103604	PGC	2.13907	2.26718	0
LRRC27	pre_spermatogonia	0.652397	0.0142386	0.0598745	0.0409966	oogonia_meiotic	2.08393	3.19427	0
FCER1G	pre_spermatogonia	0.599315	0.00719424	0.00801099	0.0320218	PGC	2.06245	3.44134	0
ABLIM3	pre_spermatogonia	0.614726	0.00966727	0.0207629	0.0350373	oogonia_meiotic	2.06016	3.35134	0
DEFB123	pre_spermatogonia	0.594178	0.00681954	0.00904097	0.0314474	PGC	2.05552	3.45944	0
THBS4	pre_spermatogonia	0.57363	0.0059952	0.0122288	0.0297961	oogonia_STRA8	2.01538	3.51338	0
CYP2C18	pre_spermatogonia	0.606164	0.0113909	0.0165942	0.0363297	PGC	2.00951	3.31512	0
DMKN	pre_spermatogonia	0.623288	0.014988	0.0224308	0.040494	PGC	1.99864	3.2066	0
ASPHD2	pre_spermatogonia	0.708904	0.0350719	0.0516765	0.0633257	oogonia_STRA8	1.9562	2.75946	0
TSPAN8	pre_spermatogonia	0.82363	0.0615258	0.0892653	0.0934808	PGC	1.952	2.37	0
TNNC2	pre_spermatogonia	0.547945	0.00666966	0.00965717	0.0293653	oogonia_meiotic	1.93312	3.52794	0
PCP4	pre_spermatogonia	0.561644	0.0101169	0.0147631	0.0332424	PGC	1.9118	3.40393	0
KRT25	pre_spermatogonia	0.5	0.00142386	0.00171664	0.0223291	PGC	1.90093	3.80186	0
FAM217A	pre_spermatogonia	0.537671	0.00719424	0.0289715	0.0294371	oogonia_meiotic	1.89556	3.5255	0
GNGT2	pre_spermatogonia	0.530822	0.00614508	0.00766766	0.0281447	PGC	1.89524	3.57039	0
DPEP3	pre_spermatogonia	0.660959	0.0314748	0.0753259	0.057869	oogonia_meiotic	1.88345	2.84957	0
RBFOX3	pre_spermatogonia	0.599315	0.0201589	0.0568047	0.0444428	oogonia_STRA8	1.866	3.11355	0
MYH7	pre_spermatogonia	0.491438	0.00194844	0.00338001	0.0224727	oogonia_meiotic	1.86523	3.79545	0
C17orf97	pre_spermatogonia	0.782534	0.0645234	0.112023	0.0946295	oogonia_meiotic	1.84505	2.35779	0
TNP1	pre_spermatogonia	0.501712	0.00509592	0.0126233	0.025919	oogonia_STRA8	1.83264	3.65278	0
KRT27	pre_spermatogonia	0.52911	0.00981715	0.0132753	0.031591	PGC	1.82801	3.45488	0
DUSP26	pre_spermatogonia	0.672945	0.0397182	0.0564202	0.0662694	PGC	1.82639	2.71403	0
MUC17	pre_spermatogonia	0.510274	0.00681954	0.0115886	0.0279294	oogonia_meiotic	1.8258	3.57808	0
VWF	pre_spermatogonia	0.55137	0.0143135	0.0176242	0.0368323	PGC	1.82028	3.30138	0
CLSTN3	pre_spermatogonia	0.57363	0.0190348	0.0228797	0.0422889	oogonia_STRA8	1.81452	3.16323	0
SAG	pre_spermatogonia	0.575342	0.0200839	0.0270085	0.0433659	PGC	1.80547	3.13808	0
GSN	pre_spermatogonia	0.67637	0.0431655	0.051957	0.0697157	PGC	1.8014	2.66333	0
RSPO4	pre_spermatogonia	0.678082	0.043765	0.0631164	0.0703619	oogonia_STRA8	1.7997	2.6541	0
ACTA2	pre_spermatogonia	0.770548	0.0672962	0.0874342	0.0967835	PGC	1.79944	2.33528	0
MYH6	pre_spermatogonia	0.513699	0.00906775	0.0120165	0.0302269	PGC	1.79744	3.49902	0
ACTN3	pre_spermatogonia	0.690068	0.0472872	0.087574	0.0742389	oogonia_STRA8	1.7945	2.60047	0
RRAD	pre_spermatogonia	0.635274	0.0352968	0.0480659	0.0604538	PGC	1.7825	2.80588	0
SOHLH1	pre_spermatogonia	0.902397	0.107614	0.523901	0.140939	oogonia_meiotic	1.76818	1.95943	0
BCO1	pre_spermatogonia	0.469178	0.00359712	0.00503548	0.0231189	PGC	1.76744	3.7671	0
MEF2C	pre_spermatogonia	0.535959	0.0153627	0.0215152	0.0371913	PGC	1.76421	3.29168	0
JAKMIP2	pre_spermatogonia	0.520548	0.012515	0.0241429	0.0338168	oogonia_meiotic	1.76299	3.3868	0
SERPINE2	pre_spermatogonia	0.866438	0.098696	0.109979	0.130887	PGC	1.76183	2.03342	0
SERPING1	pre_spermatogonia	0.578767	0.0252548	0.0315582	0.0484635	oogonia_STRA8	1.7519	3.02694	2.11847e-317
PHGDH	pre_spermatogonia	0.606164	0.0320743	0.0424915	0.0561459	oogonia_meiotic	1.74563	2.8798	2.26656e-315
FMNL1	pre_spermatogonia	0.640411	0.0404676	0.046807	0.0656232	PGC	1.74437	2.72383	5.30819e-317
CRISPLD2	pre_spermatogonia	0.828767	0.0920264	0.124743	0.122918	PGC	1.73729	2.09624	0
RAB25	pre_spermatogonia	0.582192	0.0275779	0.0382238	0.0508329	PGC	1.73447	2.97921	1.83007e-311
ADTRP	pre_spermatogonia	0.484589	0.00801859	0.0231772	0.0280011	oogonia_meiotic	1.73265	3.57551	0
TIE1	pre_spermatogonia	0.474315	0.00666966	0.00846876	0.026278	PGC	1.72604	3.63902	0
CLU	pre_spermatogonia	0.738014	0.0690947	0.0883497	0.0971424	PGC	1.72074	2.33158	0
RASIP1	pre_spermatogonia	0.619863	0.0393435	0.0757396	0.0636847	oogonia_STRA8	1.70699	2.75381	1.12354e-303
TAGLN2	pre_spermatogonia	0.881849	0.112185	0.151751	0.144457	PGC	1.70618	1.93477	0
FAM124A	pre_spermatogonia	0.599315	0.0347722	0.0579882	0.0584434	oogonia_STRA8	1.70187	2.8397	5.08141e-301
ACTC1	pre_spermatogonia	0.469178	0.00756894	0.0101854	0.0269242	PGC	1.69595	3.61473	1.13724e-315
ROPN1L	pre_spermatogonia	0.892123	0.117356	0.306132	0.149842	oogonia_meiotic	1.6934	1.89817	0
C20orf85	pre_spermatogonia	0.44863	0.00434652	0.0125543	0.0229753	oogonia_meiotic	1.69283	3.77334	0
BPIFB4	pre_spermatogonia	0.431507	0.00179856	0.00241429	0.0198162	oogonia_meiotic	1.69205	3.92126	0
CYP11A1	pre_spermatogonia	0.585616	0.0326739	0.0492103	0.0558587	PGC	1.68946	2.88493	1.03641e-296
LTB	pre_spermatogonia	0.434932	0.0029976	0.00320439	0.0211086	PGC	1.678	3.85808	0
FABP3	pre_spermatogonia	0.710616	0.0680456	0.0874342	0.0949885	PGC	1.67279	2.354	1.17786e-305
KCNK3	pre_spermatogonia	0.511986	0.0176859	0.019913	0.0384118	PGC	1.66876	3.25939	5.04977e-294
JSRP1	pre_spermatogonia	0.530822	0.0221823	0.0296407	0.0435095	PGC	1.66401	3.13478	3.63309e-290
EN1	pre_spermatogonia	0.450342	0.0067446	0.0093843	0.0253446	PGC	1.65509	3.67519	1.83133e-305
MSI1	pre_spermatogonia	0.660959	0.0567296	0.0584802	0.0820649	PGC	1.65256	2.50024	2.37634e-291
CARD11	pre_spermatogonia	0.452055	0.00756894	0.0114443	0.0262062	PGC	1.64627	3.64176	8.76913e-301
RUNX3	pre_spermatogonia	0.585616	0.037545	0.0504931	0.0605256	oogonia_STRA8	1.64247	2.80469	7.48881e-282
ARHGEF16	pre_spermatogonia	0.570205	0.033723	0.0463544	0.0562177	oogonia_meiotic	1.64135	2.87852	3.21679e-281
IL1R2	pre_spermatogonia	0.515411	0.0209832	0.0390533	0.0417145	oogonia_STRA8	1.63741	3.17691	1.44747e-282
PTH1R	pre_spermatogonia	0.773973	0.0924011	0.110059	0.120979	oogonia_STRA8	1.63474	2.11214	3.70481e-310
SV2C	pre_spermatogonia	0.469178	0.0129646	0.0291913	0.0320936	oogonia_STRA8	1.61355	3.4391	5.9217e-282
POU2F2	pre_spermatogonia	0.631849	0.0541067	0.0678501	0.0783314	oogonia_STRA8	1.6092	2.54681	5.34845e-275
FXYD1	pre_spermatogonia	0.481164	0.0161121	0.0178531	0.0356117	PGC	1.60472	3.33508	4.45338e-276
AHSG	pre_spermatogonia	0.421233	0.00494604	0.00583658	0.0224009	PGC	1.60012	3.79865	7.36945e-295
NRAP	pre_spermatogonia	0.433219	0.00704436	0.0085832	0.0249138	PGC	1.59959	3.69233	2.08121e-288
MYO18B	pre_spermatogonia	0.405822	0.00254796	0.00772574	0.0194572	oogonia_meiotic	1.59875	3.93954	2.0115e-305
SMCO2	pre_spermatogonia	0.508562	0.0233064	0.0714631	0.0436531	oogonia_meiotic	1.59255	3.13148	5.15267e-268
ITIH2	pre_spermatogonia	0.455479	0.0121403	0.0709802	0.0307295	oogonia_meiotic	1.58622	3.48253	4.66678e-275
FAM50B	pre_spermatogonia	0.422945	0.00614508	0.00670611	0.0236215	oogonia_STRA8	1.58418	3.7456	2.02595e-286
DBX2	pre_spermatogonia	0.489726	0.0198591	0.0292973	0.0395606	PGC	1.58178	3.22992	1.39634e-266
ACTG2	pre_spermatogonia	0.385274	0.00067446	0.00102998	0.0168007	PGC	1.57436	4.08634	1.12823e-313
CARTPT	pre_spermatogonia	0.416096	0.00554556	0.00720989	0.0227599	PGC	1.57399	3.78275	2.48454e-285
RAC3	pre_spermatogonia	0.753425	0.0968975	0.130572	0.124426	oogonia_STRA8	1.57017	2.08405	2.4539e-286
SMARCD3	pre_spermatogonia	0.724315	0.0881295	0.155424	0.114805	oogonia_STRA8	1.5678	2.16452	1.46532e-278
TREML1	pre_spermatogonia	0.39726	0.00284772	0.00631164	0.0193854	oogonia_STRA8	1.56649	3.94323	2.23099e-294
TMC7	pre_spermatogonia	0.482877	0.0199341	0.0274662	0.0393452	PGC	1.56229	3.23538	7.72666e-261
TDRD9	pre_spermatogonia	0.888699	0.141262	0.548527	0.172602	oogonia_meiotic	1.56124	1.75677	0
SCG5	pre_spermatogonia	0.436644	0.0104916	0.0130178	0.0283601	oogonia_STRA8	1.55566	3.56277	9.16561e-269
FLNC	pre_spermatogonia	0.582192	0.0468375	0.0532544	0.0692849	oogonia_STRA8	1.55418	2.66953	8.54416e-255
TCF15	pre_spermatogonia	0.705479	0.0848321	0.0923552	0.110856	PGC	1.55172	2.19952	5.48638e-270
CYP17A1	pre_spermatogonia	0.482877	0.0210582	0.0318151	0.0404222	PGC	1.54925	3.20838	2.17988e-256
ITLN1	pre_spermatogonia	0.392123	0.00307254	0.00366217	0.0193854	PGC	1.54623	3.94323	2.07131e-287
TM4SF5	pre_spermatogonia	0.607877	0.0554556	0.0700145	0.0786186	oogonia_meiotic	1.54592	2.54315	3.94489e-254
