# Supplementary material for: Single-cell roadmap of human gonadal development
Source: Research Square preprint supplement (doi:10.21203/rs.3.rs-496470/v1), 2021-05-21
Supplement: Supplementary file 9 [file c57f60a36211689c40839b1d.xlsx]

## Sheet: TFIDF_main_lineages
gene	cluster	geneFrequency	geneFrequencyOutsideCluster	geneFrequencySecondBest	geneFrequencyGlobal	secondBestClusterName	tfidf	idf	qval
UPK3B	Coel Epi	0.897759	0.0260746	0.292902	0.0588597	Epithelial	2.54299	2.8326	0
KLK11	Coel Epi	0.747438	0.0172919	0.32741	0.0447535	Epithelial	2.32198	3.10659	0
KRT19	Coel Epi	0.92409	0.110505	0.850604	0.141105	Epithelial	1.8096	1.95825	0
LRRN4	Coel Epi	0.52104	0.0126123	0.0622998	0.0317349	Epithelial	1.79776	3.45034	0
CRIP1	Coel Epi	0.544621	0.0319233	0.250439	0.0512064	Epithelial	1.61855	2.97189	0
SBSPON	Coel Epi	0.511041	0.0266608	0.465735	0.0448789	Metanephros	1.58616	3.10379	0
TMEM151A	Coel Epi	0.392301	0.00295688	0.0245059	0.0176005	Neural	1.58483	4.03983	0
PODXL	Coel Epi	0.626698	0.059942	0.879574	0.0812584	Metanephros	1.57309	2.51012	0
MSLN	Coel Epi	0.51579	0.0340563	0.625375	0.0521748	Epithelial	1.52321	2.95315	0
CA9	Coel Epi	0.477544	0.0269767	0.106416	0.043923	Epithelial	1.49247	3.12532	0
REC8	Coel Epi	0.726023	0.130347	0.448617	0.152751	Neural	1.36416	1.87894	0
MYRF	Coel Epi	0.648946	0.104579	0.205706	0.125053	Supporting	1.34917	2.07902	0
BNC1	Coel Epi	0.399133	0.0239026	0.204426	0.0380154	Germ cells	1.30507	3.26976	0
ASPHD1	Coel Epi	0.371719	0.0180604	0.135178	0.0313619	Neural	1.28695	3.46216	0
FXYD7	Coel Epi	0.492876	0.057796	0.203557	0.0741599	Neural	1.28223	2.60153	0
PTGS1	Coel Epi	0.531206	0.0722646	0.41089	0.0895259	Epithelial	1.28192	2.41323	0
TNNT1	Coel Epi	0.51904	0.0681321	0.480769	0.0850912	Germ cells	1.27893	2.46403	0
BICDL1	Coel Epi	0.342388	0.0147519	0.107657	0.0270746	Germ cells	1.23573	3.60916	0
WNT2B	Coel Epi	0.72369	0.161346	0.438165	0.182496	Supporting	1.23102	1.70103	0
CALB2	Coel Epi	0.435964	0.0460825	0.139197	0.0607463	Supporting	1.22116	2.80105	0
TPD52L1	Coel Epi	0.687276	0.158773	0.55171	0.178651	Epithelial	1.18371	1.72232	0
CRIP2	Coel Epi	0.739772	0.181132	0.854129	0.202143	Endothelial	1.18273	1.59878	0
RASSF7	Coel Epi	0.558537	0.108809	0.658023	0.125724	Epithelial	1.15822	2.07367	0
SPRR2F	Coel Epi	0.831014	0.229074	0.876295	0.251714	Supporting	1.14635	1.37946	0
C2orf40	Coel Epi	0.554454	0.110847	0.258468	0.127532	PV	1.14184	2.05939	0
GABRG1	Coel Epi	0.406133	0.0475804	0.191224	0.061066	Supporting	1.13547	2.7958	0
RGS10	Coel Epi	0.548788	0.110147	0.567772	0.126645	Immune	1.134	2.06637	0
LGALS3	Coel Epi	0.773686	0.210144	0.495919	0.231339	Epithelial	1.13257	1.46387	0
ALDH1A2	Coel Epi	0.733272	0.195982	0.360781	0.21619	Epithelial	1.12308	1.5316	0
COL11A1	Coel Epi	0.775352	0.217676	0.494404	0.238651	Supporting	1.11089	1.43275	0
EPS8L1	Coel Epi	0.335139	0.0254071	0.422151	0.0370564	Epithelial	1.10439	3.29531	0
CYTL1	Coel Epi	0.496542	0.0930181	0.182434	0.108195	Supporting	1.10422	2.22382	0
CLIC3	Coel Epi	0.306724	0.0165397	0.0861659	0.0274538	Epithelial	1.10275	3.59525	0
NPY	Coel Epi	0.689443	0.188895	0.788515	0.207722	Supporting	1.0835	1.57156	0
STK26	Coel Epi	0.401633	0.0578383	0.112043	0.0707689	Supporting	1.06366	2.64834	0
CYSTM1	Coel Epi	0.845263	0.263293	0.627131	0.285182	Epithelial	1.06049	1.25463	0
GCA	Coel Epi	0.624281	0.166641	0.441988	0.183853	Epithelial	1.05729	1.69362	0
LGALS2	Coel Epi	0.294725	0.0193207	0.120364	0.029679	Epithelial	1.03664	3.51732	0
DMKN	Coel Epi	0.707191	0.212472	0.747185	0.231079	Epithelial	1.03603	1.46499	0
RAB33A	Coel Epi	0.27956	0.0161619	0.231225	0.0260686	Neural	1.01956	3.64702	0
EZR	Coel Epi	0.814599	0.269552	0.678643	0.290052	Metanephros	1.00823	1.2377	0
CLDN15	Coel Epi	0.312391	0.0296177	0.104143	0.0402531	Epithelial	1.00358	3.21257	0
EMX2	Coel Epi	0.71544	0.229217	0.771361	0.247505	Epithelial	0.998988	1.39633	0
LHX2	Coel Epi	0.341722	0.0426566	0.195819	0.0539048	Supporting	0.99801	2.92054	0
SLC9A3R1	Coel Epi	0.676527	0.212101	0.726547	0.229569	Metanephros	0.995545	1.47155	0
SLCO3A1	Coel Epi	0.350221	0.0473981	0.151816	0.0587876	Supporting	0.992464	2.83382	0
CAV1	Coel Epi	0.774519	0.262616	0.768725	0.281869	Endothelial	0.980783	1.26631	0
SEMA3B	Coel Epi	0.415799	0.0831542	0.636727	0.0956654	Metanephros	0.975838	2.3469	0
KLK10	Coel Epi	0.252062	0.0124332	0.125013	0.021446	Epithelial	0.968479	3.84222	0
FLRT3	Coel Epi	0.492209	0.126254	0.379447	0.140018	Neural	0.967676	1.96599	0
KRT18	Coel Epi	0.886009	0.315201	0.911354	0.33667	Epithelial	0.964556	1.08865	0
WNT10A	Coel Epi	0.250979	0.0128143	0.095671	0.0217719	Epithelial	0.960531	3.82714	0
TRNP1	Coel Epi	0.361053	0.0599258	0.137059	0.0712515	Metanephros	0.953736	2.64154	0
TFPI2	Coel Epi	0.335472	0.0475218	0.133278	0.058352	Epithelial	0.953164	2.84126	0
ST3GAL1	Coel Epi	0.427881	0.0956982	0.437791	0.108192	Metanephros	0.951542	2.22385	0
CRNDE	Coel Epi	0.500375	0.137274	0.490077	0.15093	Germ cells	0.946178	1.89094	0
PDPN	Coel Epi	0.47721	0.125046	0.495346	0.138291	Germ cells	0.944111	1.9784	0
KRT8	Coel Epi	0.908924	0.337169	0.908668	0.358674	Epithelial	0.931958	1.02534	0
FRMD4B	Coel Epi	0.493709	0.139973	0.358878	0.153278	Endothelial	0.925953	1.8755	0
VASN	Coel Epi	0.592534	0.195151	0.538922	0.210097	Metanephros	0.924463	1.56019	0
PITPNC1	Coel Epi	0.499542	0.144584	0.343597	0.157935	Supporting	0.921941	1.84557	0
LHX9	Coel Epi	0.671194	0.238221	0.502981	0.254506	Mesenchymal_LHX9_ARX	0.918483	1.36843	0
DPEP1	Coel Epi	0.425798	0.105334	0.353902	0.117387	Supporting	0.912177	2.14228	0
RPRM	Coel Epi	0.56337	0.185317	0.495709	0.199536	Supporting	0.908018	1.61176	0
PLP2	Coel Epi	0.855179	0.327123	0.665367	0.346984	Supporting	0.905187	1.05848	0
GRB7	Coel Epi	0.359803	0.0699459	0.508937	0.0808478	Epithelial	0.904973	2.51519	0
MUS81	Coel Epi	0.432714	0.111616	0.209519	0.123693	Germ cells	0.904353	2.08995	0
PRSS35	Coel Epi	0.621615	0.220539	0.435676	0.235624	Supporting	0.898557	1.44552	0
SPOCK2	Coel Epi	0.450379	0.123759	0.726547	0.136044	Metanephros	0.898406	1.99478	0
LGALS8	Coel Epi	0.465378	0.133578	0.353959	0.146057	Metanephros	0.895275	1.92376	0
HPCAL1	Coel Epi	0.552371	0.184476	0.400347	0.198313	Endothelial	0.893684	1.61791	0
TMEM235	Coel Epi	0.183568	0.00135144	0.00675923	0.00820481	Endothelial	0.881684	4.80303	0
TSPO	Coel Epi	0.546954	0.185916	0.640149	0.199495	Epithelial	0.881673	1.61197	0
GATA5	Coel Epi	0.395134	0.0964048	0.28693	0.10764	Doublets	0.880737	2.22896	0
HSBP1L1	Coel Epi	0.335722	0.0624528	0.418742	0.0727307	Epithelial	0.879924	2.62099	0
PKHD1L1	Coel Epi	0.19465	0.00404781	0.0265802	0.0112166	Endothelial	0.874051	4.49036	0
BCAM	Coel Epi	0.918423	0.366129	0.928092	0.386902	Epithelial	0.872121	0.949584	0
EMX2OS	Coel Epi	0.470877	0.146698	0.607191	0.158891	Epithelial	0.866197	1.83954	0
PTPRF	Coel Epi	0.516124	0.17501	0.501705	0.187839	Epithelial	0.863045	1.67217	0
GABRA2	Coel Epi	0.280977	0.037303	0.104611	0.0464678	Supporting	0.862316	3.069	0
COL26A1	Coel Epi	0.333556	0.0658037	0.130685	0.0758742	Supporting	0.860133	2.57868	0
NSG1	Coel Epi	0.617115	0.234616	0.589076	0.249003	Supporting	0.85797	1.39029	0
LINC02381	Coel Epi	0.48296	0.157213	0.591304	0.169465	Neural	0.857307	1.77511	0
FLNC	Coel Epi	0.379885	0.0945193	0.185802	0.105252	Mesenchymal_GATA2_NR2F1	0.855271	2.2514	0
SLC34A2	Coel Epi	0.255479	0.0269213	0.40686	0.0355176	Epithelial	0.852718	3.33773	0
ASPG	Coel Epi	0.236897	0.0192132	0.12841	0.0274006	Metanephros	0.852164	3.59719	0
LSR	Coel Epi	0.553037	0.201635	0.48972	0.214851	Epithelial	0.850465	1.53781	0
KDR	Coel Epi	0.356887	0.0828156	0.674461	0.0931237	Endothelial	0.847188	2.37383	0
MT1F	Coel Epi	0.35447	0.0833203	0.511416	0.0935186	Epithelial	0.839952	2.3696	0
ANXA3	Coel Epi	0.284393	0.0434317	0.467714	0.0524945	Epithelial	0.838119	2.94705	0
RTN4R	Coel Epi	0.342638	0.0770711	0.223651	0.0870594	Supporting	0.836436	2.44116	0
CACNB3	Coel Epi	0.462461	0.153494	0.281509	0.165115	Supporting	0.832946	1.80111	0
FAM221A	Coel Epi	0.348554	0.0817377	0.382684	0.0917729	Germ cells	0.8325	2.38844	0
PAK4	Coel Epi	0.519623	0.189485	0.395085	0.201902	Supporting	0.831384	1.59997	0
LINC01116	Coel Epi	0.535122	0.20155	0.44699	0.214096	Supporting	0.8248	1.54133	0
ITGA3	Coel Epi	0.299142	0.0544288	0.558217	0.0636327	Metanephros	0.824024	2.75463	0
CTXN1	Coel Epi	0.611199	0.246382	0.528433	0.260103	Supporting	0.823088	1.34668	0
PRCD	Coel Epi	0.244063	0.0262179	0.303557	0.0344113	Neural	0.822338	3.36937	0
LAMA5	Coel Epi	0.334472	0.0768627	0.43513	0.0865517	Metanephros	0.818458	2.44701	0
DIRAS3	Coel Epi	0.374135	0.102263	0.401664	0.112489	Supporting	0.81745	2.1849	0
CAV2	Coel Epi	0.506624	0.188238	0.57992	0.200212	Supporting	0.814843	1.60838	0
LEF1	Coel Epi	0.491792	0.179194	0.497972	0.190952	Supporting	0.814278	1.65574	0
LY6H	Coel Epi	0.490292	0.179386	0.35717	0.19108	Mesenchymal_GATA2_NR2F1	0.811465	1.65506	0
SYT10	Coel Epi	0.261312	0.0364172	0.0819074	0.0448758	Mesenchymal_GATA2_NR2F1	0.811074	3.10386	0
TVP23A	Coel Epi	0.457129	0.159232	0.500966	0.170436	Supporting	0.80884	1.76939	0
CNGB3	Coel Epi	0.194567	0.00869155	0.0315747	0.0156825	Supporting	0.808467	4.15521	0
SLC38A1	Coel Epi	0.376052	0.106383	0.433103	0.116525	Epithelial	0.808379	2.14965	0
KANK4	Coel Epi	0.327556	0.0756708	0.210336	0.0851445	Supporting	0.806903	2.46341	0
CD9	Coel Epi	0.571452	0.231178	0.751731	0.243976	Epithelial	0.80614	1.41069	0
CARNS1	Coel Epi	0.177485	0.00442556	0.0319361	0.0109345	Metanephros	0.801493	4.51583	0
TNFAIP8	Coel Epi	0.309724	0.0666406	0.211751	0.0757833	Immune	0.799051	2.57988	0
DOCK11	Coel Epi	0.281727	0.0506155	0.191342	0.0593078	Germ cells	0.795881	2.82501	0
KCNK6	Coel Epi	0.272727	0.0456721	0.128951	0.0542119	Immune	0.79496	2.91485	0
PODN	Coel Epi	0.232231	0.0250293	0.0621063	0.0328224	Mesenchymal_GATA2_NR2F1	0.79345	3.41664	0
CDCA7L	Coel Epi	0.547038	0.222564	0.653758	0.234768	Germ cells	0.792744	1.44916	0
AATF	Coel Epi	0.446129	0.159001	0.576835	0.1698	Germ cells	0.791047	1.77313	0
SPOCK1	Coel Epi	0.269478	0.0446789	0.174308	0.0531338	Neural	0.790901	2.93494	0
CNTN4	Coel Epi	0.399133	0.1277	0.243874	0.137909	Neural	0.790749	1.98116	0
MGP	Coel Epi	0.533706	0.215638	0.583065	0.227601	PV	0.789971	1.48016	0
KHDRBS2	Coel Epi	0.279977	0.0509867	0.153	0.0595993	Supporting	0.789565	2.82011	0
ANXA11	Coel Epi	0.485043	0.18518	0.695423	0.196458	Epithelial	0.789314	1.62731	0
RAB11FIP2	Coel Epi	0.471794	0.17682	0.483418	0.187915	Epithelial	0.78873	1.67177	0
CXADR	Coel Epi	0.373636	0.111531	0.525615	0.121389	Metanephros	0.787905	2.10875	0
FGF13	Coel Epi	0.376552	0.113619	0.280865	0.123508	Supporting	0.78754	2.09145	0
LMNB1	Coel Epi	0.409633	0.136385	0.293676	0.146662	Neural	0.786341	1.91963	0
MT1E	Coel Epi	0.318307	0.0756676	0.256154	0.0847935	Metanephros	0.785434	2.46754	0
MMEL1	Coel Epi	0.194484	0.010945	0.117987	0.0178481	Epithelial	0.782964	4.02586	0
JADE1	Coel Epi	0.370552	0.111453	0.346329	0.121198	Germ cells	0.781988	2.11033	0
CDK6	Coel Epi	0.573452	0.243849	0.507115	0.256245	Neural	0.780824	1.36162	0
PDZK1IP1	Coel Epi	0.213149	0.0183242	0.201467	0.0256518	Epithelial	0.780795	3.66314	0
CRB2	Coel Epi	0.181902	0.00714146	0.18829	0.0137144	Metanephros	0.780232	4.28931	0
CDH3	Coel Epi	0.458045	0.17149	0.457068	0.182267	Supporting	0.779722	1.70228	0
P4HA2	Coel Epi	0.499125	0.198769	0.524763	0.210066	Germ cells	0.778802	1.56033	0
MGARP	Coel Epi	0.390301	0.1267	0.449357	0.136614	Supporting	0.776931	1.99059	0
HHIP	Coel Epi	0.294892	0.0632506	0.160717	0.0719629	Mesenchymal_LHX9_ARX	0.776039	2.6316	0
IRX3	Coel Epi	0.329056	0.0855543	0.384275	0.0947126	Supporting	0.775554	2.35691	0
ANXA2	Coel Epi	0.659528	0.296089	0.876913	0.309758	Metanephros	0.772943	1.17196	0
DAPK1	Coel Epi	0.427048	0.153934	0.302902	0.164206	Supporting	0.771519	1.80663	0
SH2D4A	Coel Epi	0.326056	0.0848541	0.270439	0.093926	Supporting	0.771204	2.36525	0
NECTIN2	Coel Epi	0.72494	0.331747	0.763806	0.346536	Metanephros	0.768269	1.05977	0
AMHR2	Coel Epi	0.649613	0.293295	0.723765	0.306696	Supporting	0.767775	1.1819	0
ANXA1	Coel Epi	0.302391	0.0702683	0.574185	0.0789987	Metanephros	0.767567	2.53832	0
PROCR	Coel Epi	0.465711	0.182203	0.497077	0.192866	Endothelial	0.766448	1.64576	0
GALNT9	Coel Epi	0.243813	0.0353686	0.0689093	0.0432085	Mesenchymal_GATA2_NR2F1	0.765992	3.14172	0
RAB38	Coel Epi	0.43813	0.164088	0.3421	0.174395	Supporting	0.765166	1.74643	0
FAM89A	Coel Epi	0.340472	0.0966198	0.362608	0.105791	Metanephros	0.764797	2.24629	0
PKIG	Coel Epi	0.6052	0.270268	0.457416	0.282865	Supporting	0.764236	1.26278	0
HOPX	Coel Epi	0.526623	0.222874	0.582688	0.234298	Supporting	0.764215	1.45116	0
LDOC1	Coel Epi	0.739688	0.342106	0.595272	0.35706	Supporting	0.76177	1.02985	0
BMP4	Coel Epi	0.299558	0.0701511	0.188346	0.0787794	Epithelial	0.761209	2.5411	0
UGP2	Coel Epi	0.545371	0.236036	0.430717	0.247671	Germ cells	0.76115	1.39566	0
SCG5	Coel Epi	0.586534	0.26131	0.543478	0.273542	Neural	0.760325	1.2963	0
BASP1	Coel Epi	0.580952	0.258812	0.530435	0.270928	Neural	0.758666	1.3059	0
SERPINB9	Coel Epi	0.397967	0.139846	0.457799	0.149555	Supporting	0.756175	1.90009	0
DPP10	Coel Epi	0.417049	0.153387	0.491114	0.163303	Supporting	0.755753	1.81215	0
JUP	Coel Epi	0.507624	0.214937	0.737886	0.225946	Epithelial	0.755071	1.48746	0
ADAM15	Coel Epi	0.317557	0.0839846	0.540647	0.0927695	Endothelial	0.755035	2.37764	0
NELL2	Coel Epi	0.282226	0.060551	0.348617	0.0688885	Neural	0.755031	2.67527	0
SPINT2	Coel Epi	0.87801	0.406392	0.916833	0.424131	Metanephros	0.753082	0.857714	0
SSH3	Coel Epi	0.260062	0.0481243	0.215415	0.0560955	Epithelial	0.74916	2.8807	0
SOX6	Coel Epi	0.358053	0.11426	0.395805	0.123429	Epithelial	0.749078	2.09209	0
TRAPPC2L	Coel Epi	0.701525	0.330035	0.72032	0.344007	Germ cells	0.748593	1.06709	0
HSPB7	Coel Epi	0.221232	0.0266445	0.17043	0.0339632	PV	0.748311	3.38248	0
SH3BP5	Coel Epi	0.584618	0.266155	0.560376	0.278133	Endothelial	0.748109	1.27966	0
ANXA4	Coel Epi	0.462211	0.187915	0.578366	0.198232	Epithelial	0.748005	1.61832	0
IFITM1	Coel Epi	0.771436	0.363928	0.610084	0.379255	Epithelial	0.747943	0.969547	0
GSDME	Coel Epi	0.299475	0.0738114	0.21751	0.0822989	Germ cells	0.747908	2.4974	0
TCEAL2	Coel Epi	0.544288	0.242621	0.575865	0.253967	Supporting	0.745975	1.37055	0
C8orf88	Coel Epi	0.373552	0.126674	0.421409	0.135959	Germ cells	0.745386	1.9954	0
AC245041.2	Coel Epi	0.150737	0.00150775	0.00588904	0.00712045	Epithelial	0.745364	4.94478	0
RHPN2	Coel Epi	0.223065	0.0281197	0.242174	0.0354518	Epithelial	0.744943	3.33958	0
HHIP-AS1	Coel Epi	0.31514	0.0855673	0.164391	0.0942018	Mesenchymal_LHX9_ARX	0.744461	2.36232	0
SYNGR2	Coel Epi	0.454045	0.184431	0.69191	0.194571	Epithelial	0.743253	1.63696	0
CD47	Coel Epi	0.572619	0.262505	0.521232	0.274169	Epithelial	0.740976	1.29401	0
TSPAN13	Coel Epi	0.493959	0.212834	0.515117	0.223407	Supporting	0.740325	1.49876	0
APLP1	Coel Epi	0.271894	0.0577146	0.528063	0.0657701	Neural	0.739984	2.72159	0
SLC30A4	Coel Epi	0.294809	0.0734271	0.191363	0.0817535	Supporting	0.738215	2.50405	0
LEPROTL1	Coel Epi	0.483043	0.20778	0.458897	0.218133	Endothelial	0.735506	1.52265	0
UCHL1	Coel Epi	0.657862	0.314045	0.752964	0.326977	Neural	0.735402	1.11787	0
CSRP1	Coel Epi	0.662195	0.316409	0.61371	0.329415	PV	0.735326	1.11044	0
SLC39A10	Coel Epi	0.618782	0.293575	0.575886	0.305806	Epithelial	0.733135	1.1848	0
ALCAM	Coel Epi	0.551037	0.253286	0.495675	0.264485	Metanephros	0.732865	1.32997	0
MAGI1	Coel Epi	0.312141	0.0871336	0.286703	0.0955964	Epithelial	0.732788	2.34762	0
WDR54	Coel Epi	0.489793	0.214192	0.466164	0.224557	Epithelial	0.731566	1.49362	0
CDC42EP1	Coel Epi	0.529789	0.241198	0.541286	0.252052	Endothelial	0.730113	1.37812	0
PRKCG	Coel Epi	0.184401	0.0126872	0.0743765	0.0191456	Germ cells	0.729433	3.95568	0
MMP28	Coel Epi	0.207566	0.0230559	0.236938	0.0299955	Endothelial	0.727873	3.50671	0
SHMT2	Coel Epi	0.594867	0.282917	0.587767	0.294649	Epithelial	0.726909	1.22197	0
MBNL3	Coel Epi	0.461878	0.197343	0.46168	0.207292	Supporting	0.726823	1.57363	0
NEO1	Coel Epi	0.364553	0.12753	0.230706	0.136445	Epithelial	0.726129	1.99183	0
MT2A	Coel Epi	0.511041	0.231145	0.525544	0.241672	Supporting	0.725766	1.42017	0
GAS6	Coel Epi	0.575035	0.271685	0.560213	0.283094	Metanephros	0.725681	1.26198	0
ABRACL	Coel Epi	0.658278	0.320294	0.71573	0.333006	Doublets	0.723839	1.09959	0
PAWR	Coel Epi	0.408299	0.161928	0.447771	0.171195	Metanephros	0.720629	1.76495	0
SLC16A3	Coel Epi	0.35797	0.125042	0.294912	0.133803	Supporting	0.720016	2.01139	0
KLK5	Coel Epi	0.158737	0.0049759	0.0522781	0.010759	Epithelial	0.719397	4.53201	0
TSTD1	Coel Epi	0.558287	0.26484	0.753177	0.275877	Epithelial	0.718963	1.2878	0
GATA6	Coel Epi	0.501208	0.227993	0.368682	0.238269	Doublets	0.718911	1.43436	0
OCIAD2	Coel Epi	0.577535	0.276781	0.69284	0.288093	Epithelial	0.718726	1.24447	0
VAMP8	Coel Epi	0.323473	0.100335	0.691949	0.108728	Metanephros	0.717757	2.21891	0
CDH5	Endothelial	0.78818	0.00541	0.0898314	0.0322677	Germ cells	2.70637	3.43369	0
TIE1	Endothelial	0.748447	0.00577997	0.0221344	0.0312617	Neural	2.59364	3.46536	0
VWF	Endothelial	0.74863	0.0059682	0.0431156	0.0314497	Germ cells	2.58978	3.45937	0
PECAM1	Endothelial	0.740592	0.00754869	0.125654	0.0327002	Immune	2.5331	3.42038	0
SOX18	Endothelial	0.726525	0.00607854	0.0509308	0.0307978	Germ cells	2.52853	3.48031	0
MYCT1	Endothelial	0.67099	0.00243401	0.00592885	0.0253729	Neural	2.46527	3.67407	0
ESAM	Endothelial	0.788546	0.0193001	0.388306	0.0456937	PV	2.43329	3.08579	0
ROBO4	Endothelial	0.605042	0.00147988	0.00561995	0.0221887	Germ cells	2.3041	3.80817	0
APLNR	Endothelial	0.630526	0.00492644	0.0628458	0.0263914	Neural	2.29178	3.63472	0
CLEC14A	Endothelial	0.670625	0.0106383	0.0304348	0.0332831	Neural	2.28194	3.40271	0
CLDN5	Endothelial	0.654001	0.00914216	0.664005	0.0312679	Metanephros	2.26622	3.46516	0
CD93	Endothelial	0.61582	0.00483557	0.145627	0.0257991	Immune	2.25231	3.65742	0
ICAM2	Endothelial	0.6308	0.00745133	0.09172	0.0288391	Immune	2.23683	3.54602	0
GIMAP4	Endothelial	0.627329	0.00787322	0.332558	0.0291274	Immune	2.21828	3.53608	0
CD34	Endothelial	0.845269	0.0531783	0.114448	0.0803558	Mesenchymal_GATA2_NR2F1	2.13117	2.52129	0
EMCN	Endothelial	0.722141	0.0301526	0.129032	0.0538954	PV	2.10916	2.92071	0
FLT1	Endothelial	0.570881	0.00678603	0.0465735	0.0261407	Metanephros	2.08044	3.64426	0
A2M	Endothelial	0.84673	0.0592244	0.600806	0.0862446	PV	2.07497	2.45057	0
ADGRL4	Endothelial	0.528042	0.00193748	0.00922023	0.0199887	Germ cells	2.06601	3.91259	0
ADGRF5	Endothelial	0.572525	0.00774016	0.229167	0.0271185	PV	2.0654	3.60754	0
PTPRB	Endothelial	0.519456	0.00215167	0.0093147	0.0199009	Metanephros	2.0347	3.91699	0
TM4SF18	Endothelial	0.641396	0.0221885	0.11988	0.0434341	Sertoli	2.01174	3.13651	0
KANK3	Endothelial	0.528864	0.00541325	0.0772743	0.0233734	Germ cells	1.9865	3.75616	0
ERG	Endothelial	0.52722	0.00588058	0.0197581	0.0237683	PV	1.97149	3.7394	0
CXorf36	Endothelial	0.486025	0.000811338	0.00500527	0.0174595	Germ cells	1.96737	4.04787	0
EGFL7	Endothelial	0.944647	0.0995771	0.610818	0.128572	Germ cells	1.93772	2.05126	0
GMFG	Endothelial	0.574169	0.0156913	0.488268	0.0348532	Immune	1.92726	3.35661	0
AFAP1L1	Endothelial	0.559828	0.0142568	0.219354	0.032976	Germ cells	1.91012	3.41198	0
MMRN2	Endothelial	0.506577	0.00623757	0.0366175	0.0234047	Germ cells	1.9021	3.75482	0
SOX7	Endothelial	0.462824	0.00240156	0.00948617	0.0181991	Neural	1.85425	4.00638	0
TMEM88	Endothelial	0.556997	0.0181383	0.168403	0.0366271	Coel Epi	1.84197	3.30697	0
ADCY4	Endothelial	0.470497	0.00415081	0.0658602	0.0201516	PV	1.83704	3.90447	0
EPAS1	Endothelial	0.625502	0.0372826	0.317391	0.057465	Neural	1.7868	2.85658	0
TM4SF1	Endothelial	0.800329	0.0830648	0.395833	0.107675	PV	1.78364	2.22864	0
FLI1	Endothelial	0.515437	0.0152953	0.243746	0.0324557	Immune	1.76685	3.42788	0
GIMAP7	Endothelial	0.43597	0.00390091	0.145627	0.0187257	Immune	1.73423	3.97786	0
ECSCR	Endothelial	0.405462	0.000967115	0.00497312	0.0148458	PV	1.70701	4.21004	0
PLXND1	Endothelial	0.632262	0.047684	0.21823	0.0677414	Metanephros	1.70208	2.69206	0
ELK3	Endothelial	0.679211	0.0612106	0.228135	0.0824148	Germ cells	1.6953	2.49599	0
TEK	Endothelial	0.473968	0.0130333	0.0404133	0.0288485	Coel Epi	1.68055	3.5457	0
PRKCH	Endothelial	0.439258	0.006984	0.0469265	0.0218158	Immune	1.68022	3.82512	0
CAVIN2	Endothelial	0.562386	0.0323756	0.150941	0.0505608	PV	1.67848	2.98458	0
EMP1	Endothelial	0.596273	0.0464669	0.216138	0.0653314	Epithelial	1.6268	2.72828	0
PCAT19	Endothelial	0.377055	0.000908699	0.00134518	0.0138147	lowQC	1.61456	4.28202	0
ENTPD1	Endothelial	0.497991	0.0227824	0.25578	0.0390873	PV	1.61446	3.24196	0
PCDH12	Endothelial	0.395963	0.00350498	0.0860966	0.0169706	Immune	1.61405	4.07627	0
LMO2	Endothelial	0.537176	0.0328819	0.19301	0.0501847	Germ cells	1.60725	2.99204	0
KDR	Endothelial	0.674461	0.0724687	0.356887	0.0931237	Coel Epi	1.60105	2.37383	0
CALCRL	Endothelial	0.764341	0.10377	0.252896	0.126435	Coel Epi	1.58068	2.06803	0
RGCC	Endothelial	0.500183	0.0278386	0.367776	0.0440452	Erythroid	1.56184	3.12254	0
DYSF	Endothelial	0.428023	0.0117904	0.127678	0.0260717	Germ cells	1.56096	3.6469	0
VAMP5	Endothelial	0.695744	0.0866055	0.731204	0.107506	Metanephros	1.55166	2.23021	0
RASGRP3	Endothelial	0.401169	0.00764929	0.0383944	0.0211514	Immune	1.54693	3.85605	0
GIMAP6	Endothelial	0.347735	0.00211597	0.0913322	0.0139745	Immune	1.48501	4.27052	0
NOSTRIN	Endothelial	0.566039	0.0558817	0.225572	0.0733858	Doublets	1.47851	2.61203	0
PLVAP	Endothelial	0.397059	0.0112387	0.10198	0.0244765	Erythroid	1.4731	3.71004	0
FLT4	Endothelial	0.383175	0.00857422	0.087159	0.0214272	Metanephros	1.47258	3.8431	0
EFNA1	Endothelial	0.703964	0.103796	0.440231	0.124388	Epithelial	1.4673	2.08435	0
SCARF1	Endothelial	0.357234	0.0047804	0.0484778	0.0168735	Immune	1.45823	4.08201	0
ITGA5	Endothelial	0.498813	0.0379901	0.123522	0.0538014	PV	1.45776	2.92246	0
DUSP6	Endothelial	0.587961	0.068253	0.263241	0.0860847	Neural	1.44193	2.45242	0
TGFBR2	Endothelial	0.596365	0.0721539	0.242292	0.0901401	Neural	1.43509	2.40639	0
IL3RA	Endothelial	0.363719	0.0072631	0.0709715	0.0194935	Immune	1.43221	3.93768	0
RAMP3	Endothelial	0.332481	0.00278451	0.0449596	0.0140967	Germ cells	1.41697	4.26181	0
ARHGEF15	Endothelial	0.317136	0.000814583	0.00755181	0.0116679	Germ cells	1.41154	4.45092	0
CYYR1	Endothelial	0.616642	0.0830745	0.495816	0.101382	Epithelial	1.41141	2.28886	0
DLL4	Endothelial	0.353215	0.00660105	0.0573925	0.0184937	PV	1.40944	3.99032	0
BCL6B	Endothelial	0.328462	0.00303765	0.0634001	0.0142033	Germ cells	1.39737	4.25428	0
CD40	Endothelial	0.367464	0.0120403	0.09172	0.0242352	Immune	1.36695	3.71995	0
CRIP2	Endothelial	0.854129	0.178978	0.789544	0.202143	Epithelial	1.36556	1.59878	0
SOX17	Endothelial	0.461089	0.0379154	0.516376	0.052435	Epithelial	1.35937	2.94818	0
RBP7	Endothelial	0.353307	0.0100573	0.0620782	0.0218346	Coel Epi	1.35114	3.82426	0
GNG11	Endothelial	0.920259	0.207719	0.419548	0.232167	Coel Epi	1.34385	1.4603	0
SPP1	Endothelial	0.432042	0.0308438	0.396548	0.0446094	Immune	1.34357	3.10981	0
LYVE1	Endothelial	0.353398	0.0112971	0.375218	0.0230349	Immune	1.33257	3.77074	0
GIMAP8	Endothelial	0.306723	0.00261575	0.0967617	0.01305	Immune	1.33086	4.33897	0
HSPG2	Endothelial	0.826087	0.179767	0.372043	0.201942	Epithelial	1.32155	1.59977	0
ETS1	Endothelial	0.543296	0.0729815	0.208737	0.0891184	PV	1.31357	2.41779	0
HHEX	Endothelial	0.347278	0.0116151	0.207763	0.0231321	Germ cells	1.30804	3.76654	0
PDE2A	Endothelial	0.304165	0.00341411	0.0208992	0.0137332	Germ cells	1.30424	4.28794	0
TFPI	Endothelial	0.683869	0.13007	0.384812	0.149072	PV	1.30163	1.90333	0
S1PR1	Endothelial	0.427019	0.0344624	0.116151	0.0479314	Supporting	1.29728	3.03798	0
ADAM15	Endothelial	0.540647	0.0768564	0.317557	0.0927695	Coel Epi	1.28546	2.37764	0
MADCAM1	Endothelial	0.376233	0.0208741	0.0562873	0.0330668	Germ cells	1.28266	3.40922	0
EHD4	Endothelial	0.499726	0.0618597	0.211187	0.0768833	Germ cells	1.28203	2.56547	0
ARHGDIB	Endothelial	0.44209	0.0413945	0.673841	0.0551427	Immune	1.2811	2.89783	0
TMEM255B	Endothelial	0.320789	0.00780832	0.0662979	0.018547	Germ cells	1.27913	3.98745	0
RBP5	Endothelial	0.298411	0.00372242	0.0238661	0.0138335	Epithelial	1.2774	4.28066	0
PODXL	Endothelial	0.506303	0.0661565	0.879574	0.0812584	Metanephros	1.27088	2.51012	0
SMAGP	Endothelial	0.435057	0.042037	0.476115	0.055522	Germ cells	1.25774	2.89098	0
ENG	Endothelial	0.814487	0.192641	0.417045	0.213977	Mesenchymal_LHX9_ARX	1.25585	1.54189	0
SNRK	Endothelial	0.507033	0.0690935	0.182392	0.0841197	PV	1.25517	2.47551	0
GIMAP1	Endothelial	0.286536	0.00289161	0.110723	0.0126238	Immune	1.25279	4.37218	0
ARHGAP31	Endothelial	0.389021	0.0275628	0.0693548	0.0399648	PV	1.25255	3.21976	0
SHANK3	Endothelial	0.324808	0.0116573	0.0243827	0.0224018	Epithelial	1.23382	3.79861	0
HLA-E	Endothelial	0.870661	0.22107	0.663952	0.243358	Immune	1.23044	1.41322	0
ACVRL1	Endothelial	0.356412	0.020397	0.106855	0.0319261	PV	1.2276	3.44433	0
TCIM	Endothelial	0.558001	0.0952965	0.260136	0.111172	Mesenchymal_LHX9_ARX	1.22575	2.19667	0
THSD1	Endothelial	0.329193	0.0135688	0.060151	0.0243982	Germ cells	1.22237	3.71325	0
DOCK9	Endothelial	0.359152	0.0223378	0.0941213	0.0338942	Epithelial	1.21556	3.38451	0
ETS2	Endothelial	0.617921	0.124832	0.36047	0.141751	Coel Epi	1.20722	1.95368	0
ECM1	Endothelial	0.415601	0.0422675	0.221557	0.0550769	Metanephros	1.20484	2.89902	0
FGD5	Endothelial	0.309189	0.0101742	0.100105	0.0204337	Germ cells	1.20292	3.89057	0
TSPAN18	Endothelial	0.445195	0.0555637	0.247036	0.0689323	Neural	1.19073	2.67463	0
RPS6KA2	Endothelial	0.453051	0.0587928	0.157717	0.0723202	Supporting	1.19001	2.62665	0
MEF2C	Endothelial	0.704238	0.168823	0.713844	0.187194	PV	1.18003	1.67561	0
RASIP1	Endothelial	0.496072	0.0806892	0.132239	0.0949414	Coel Epi	1.168	2.3545	0
OIT3	Endothelial	0.255115	0.00173626	0.00570776	0.01043	Germ cells	1.16411	4.56307	0
MMRN1	Endothelial	0.254476	0.00177845	0.0230754	0.0104488	Immune	1.16073	4.56127	0
MFNG	Endothelial	0.273383	0.00563718	0.115377	0.0148238	Immune	1.15136	4.21152	0
MAP4K2	Endothelial	0.438071	0.0595262	0.182209	0.0725145	Germ cells	1.14948	2.62397	0
TMEM204	Endothelial	0.472141	0.0739973	0.23078	0.087658	PV	1.14934	2.43431	0
NRP2	Endothelial	0.65053	0.154203	0.40751	0.171232	Neural	1.14801	1.76473	0
UTRN	Endothelial	0.590884	0.129532	0.368683	0.145361	PV	1.13954	1.92853	0
LYL1	Endothelial	0.328553	0.0215199	0.387175	0.0320546	Erythroid	1.13033	3.44032	0
HLX	Endothelial	0.2827	0.00917136	0.0952957	0.0185564	PV	1.12711	3.98694	0
RP1	Endothelial	0.266167	0.00559823	0.0721812	0.0145386	Germ cells	1.12614	4.23095	0
PPP1R16B	Endothelial	0.244246	0.00177845	0.0304348	0.0100977	Neural	1.12242	4.59544	0
SHE	Endothelial	0.278681	0.00879815	0.143572	0.0180581	Germ cells	1.11867	4.01416	0
FAM241A	Endothelial	0.311472	0.018135	0.196505	0.0281997	PV	1.11147	3.56844	0
NOTCH4	Endothelial	0.332389	0.0250574	0.0541502	0.0356022	Neural	1.10863	3.33535	0
SH2D3C	Endothelial	0.347552	0.0307984	0.277688	0.0416665	PV	1.10454	3.17806	0
LPAR6	Endothelial	0.537176	0.1141	0.349816	0.128616	Immune	1.10171	2.05092	0
F2R	Endothelial	0.475521	0.0855994	0.539587	0.098978	Metanephros	1.09981	2.31286	0
CAVIN1	Endothelial	0.775119	0.223433	0.627823	0.242362	PV	1.09859	1.41732	0
CLEC3B	Endothelial	0.288089	0.0140816	0.0436248	0.0234831	Doublets	1.08076	3.75148	0
EFNB2	Endothelial	0.555261	0.128698	0.491683	0.143334	Epithelial	1.07864	1.94258	0
EDN1	Endothelial	0.279868	0.0121084	0.130179	0.0212955	Epithelial	1.07729	3.84926	0
FXYD5	Endothelial	0.676927	0.186848	0.373667	0.203663	Immune	1.07719	1.59129	0
DUSP5	Endothelial	0.403635	0.0580626	0.297682	0.0699196	Germ cells	1.07384	2.66041	0
LIMCH1	Endothelial	0.478078	0.093411	0.242951	0.106609	Doublets	1.07022	2.23858	0
STOM	Endothelial	0.588053	0.146943	0.369248	0.162078	Germ cells	1.07007	1.81968	0
RAPGEF5	Endothelial	0.378882	0.0480799	0.172177	0.0594301	PV	1.06957	2.82296	0
TNFSF10	Endothelial	0.266441	0.00976202	0.102191	0.018569	Immune	1.06211	3.98626	0
LDB2	Endothelial	0.704238	0.204892	0.50831	0.222025	Mesenchymal_GATA2_NR2F1	1.05985	1.50496	0
TGM2	Endothelial	0.395232	0.0572123	0.156675	0.0688101	Erythroid	1.0578	2.6764	0
PTPRM	Endothelial	0.412678	0.0654782	0.183614	0.077391	Germ cells	1.056	2.55888	0
PIM3	Endothelial	0.573529	0.144554	0.389621	0.159273	Germ cells	1.05365	1.83714	0
HDAC7	Endothelial	0.538546	0.127341	0.281021	0.14145	Epithelial	1.05329	1.95581	0
MAP3K11	Endothelial	0.476982	0.0989183	0.243765	0.11189	Germ cells	1.0447	2.19024	0
CSRP2	Endothelial	0.519821	0.120565	0.432209	0.134264	Germ cells	1.04377	2.00795	0
RFLNB	Endothelial	0.273383	0.0130982	0.0705256	0.0220289	Metanephros	1.04307	3.8154	0
WWTR1	Endothelial	0.675009	0.197441	0.378629	0.213827	PV	1.04126	1.54259	0
RAMP2	Endothelial	0.932499	0.308815	0.565825	0.330214	Mesenchymal_GATA2_NR2F1	1.03322	1.10801	0
PCDH17	Endothelial	0.466752	0.0970879	0.293059	0.109772	Coel Epi	1.03122	2.20935	0
PALMD	Endothelial	0.315309	0.0287798	0.239384	0.0386109	Epithelial	1.02608	3.25422	0
CARD8	Endothelial	0.376324	0.0553332	0.156874	0.0663468	Immune	1.02092	2.71286	0
FAM107B	Endothelial	0.456522	0.0959845	0.311732	0.108355	Germ cells	1.01455	2.22234	0
PXN	Endothelial	0.475795	0.1061	0.319764	0.118785	Epithelial	1.01365	2.13044	0
LRRC32	Endothelial	0.349927	0.0449676	0.322043	0.0554311	PV	1.0122	2.89262	0
MSN	Endothelial	0.701133	0.219707	0.502419	0.236225	PV	1.01171	1.44297	0
NRN1	Endothelial	0.214834	0.00188555	0.0151036	0.00919202	Germ cells	1.00745	4.68942	0
FAM167B	Endothelial	0.216204	0.00221982	0.00608283	0.00956184	Coel Epi	1.00534	4.64998	0
USHBP1	Endothelial	0.207618	0.000811338	0.00579557	0.00790708	Germ cells	1.00487	4.84	0
C1orf115	Endothelial	0.429759	0.084668	0.255159	0.0965084	Sertoli	1.00483	2.33813	0
TGFB1	Endothelial	0.456796	0.0987333	0.414776	0.111019	Immune	1.00406	2.19806	0
ABI3	Endothelial	0.237943	0.00726959	0.143688	0.0151842	Immune	0.996386	4.1875	0
GPIHBP1	Endothelial	0.202685	0.000486803	0.0067615	0.00742445	Germ cells	0.993762	4.90298	0
PRCP	Endothelial	0.881805	0.304855	0.532286	0.324651	Epithelial	0.992034	1.125	0
PKP4	Endothelial	0.472415	0.110404	0.277611	0.122825	Epithelial	0.990653	2.097	0
FAM69B	Endothelial	0.381257	0.0647772	0.201157	0.075636	Epithelial	0.984338	2.58182	0
DOCK6	Endothelial	0.348739	0.0503094	0.156317	0.0605489	PV	0.977972	2.8043	0
NOTCH1	Endothelial	0.336226	0.0448475	0.175099	0.054845	Neural	0.976146	2.90324	0
PPM1F	Endothelial	0.339788	0.0464832	0.156305	0.0565468	Germ cells	0.976105	2.87269	0
CAV1	Endothelial	0.768725	0.264571	0.774519	0.281869	Coel Epi	0.973447	1.26631	0
CRHBP	Endothelial	0.219949	0.00463436	0.0374078	0.012022	Germ cells	0.972397	4.42101	0
ARHGAP18	Endothelial	0.471136	0.115301	0.303859	0.12751	Immune	0.970334	2.05956	0
APOL3	Endothelial	0.22141	0.00525422	0.0395579	0.0126708	Immune	0.967222	4.36846	0
GGT5	Endothelial	0.338235	0.047327	0.125083	0.0573083	Metanephros	0.967119	2.85931	0
TNFAIP8L1	Endothelial	0.31951	0.038915	0.0824465	0.0485425	Epithelial	0.96662	3.02531	0
FAM43A	Endothelial	0.299141	0.0306394	0.0616666	0.0398519	Mesenchymal_GATA2_NR2F1	0.964008	3.22258	0
PIEZO1	Endothelial	0.278498	0.0231166	0.122358	0.0318791	Immune	0.959651	3.44581	0
NRROS	Endothelial	0.234472	0.00896042	0.19585	0.016698	Immune	0.95957	4.09247	0
ARAP3	Endothelial	0.332755	0.0461619	0.125	0.0559952	PV	0.959162	2.88249	0
NOVA2	Endothelial	0.220862	0.00565665	0.122134	0.0130406	Neural	0.958474	4.33969	0
SLC9A3R2	Endothelial	0.713555	0.245186	0.78177	0.261257	Metanephros	0.957771	1.34225	0
AP1S2	Endothelial	0.624224	0.201205	0.624506	0.21572	Neural	0.957419	1.53378	0
STAB1	Endothelial	0.234015	0.00947643	0.440954	0.0171806	Immune	0.951033	4.06397	0
CYBA	Endothelial	0.646328	0.21553	0.811344	0.230311	Epithelial	0.949018	1.46832	0
RHOJ	Endothelial	0.341615	0.0523086	0.180645	0.062235	PV	0.948609	2.77684	0
HEG1	Endothelial	0.328919	0.0467331	0.0971804	0.0564151	Doublets	0.945647	2.87502	0
SASH1	Endothelial	0.361984	0.0635472	0.203557	0.0737869	Neural	0.943538	2.60657	0
TACC1	Endothelial	0.548959	0.167411	0.427823	0.180503	PV	0.939822	1.71201	0
KLF2	Endothelial	0.681768	0.23683	0.420642	0.252096	Doublets	0.93944	1.37795	0
AC010737.1	Endothelial	0.202594	0.0030052	0.00664914	0.0098533	Supporting	0.935974	4.61995	0
TMEM37	Endothelial	0.362989	0.066838	0.254729	0.0769993	Coel Epi	0.930688	2.56396	0
TLNRD1	Endothelial	0.3924	0.0833179	0.167608	0.0939229	PV	0.928137	2.36528	0
CPNE2	Endothelial	0.366916	0.0695349	0.28056	0.0797384	Coel Epi	0.927933	2.529	0
ID1	Endothelial	0.642492	0.221502	0.574308	0.235946	Neural	0.927855	1.44415	0
TSPO	Endothelial	0.572159	0.186254	0.640149	0.199495	Epithelial	0.922302	1.61197	0
ITM2A	Endothelial	0.65802	0.23237	0.569006	0.246975	Mesenchymal_GATA2_NR2F1	0.92022	1.39847	0
PARVB	Endothelial	0.44209	0.113701	0.316557	0.124968	Coel Epi	0.919412	2.0797	0
IL33	Endothelial	0.272744	0.0259012	0.142339	0.0343706	PV	0.919298	3.37055	0
NR5A2	Endothelial	0.20643	0.00497188	0.0438181	0.0118841	Germ cells	0.915013	4.43255	0
MECOM	Endothelial	0.257033	0.0203873	0.486001	0.0285069	Epithelial	0.914424	3.55761	0
NRP1	Endothelial	0.536536	0.169313	0.422715	0.181913	PV	0.914379	1.70423	0
JUP	Endothelial	0.61171	0.21224	0.737886	0.225946	Epithelial	0.909894	1.48746	0
SRGN	Endothelial	0.251005	0.0187419	0.638356	0.0267111	Immune	0.909309	3.62268	0
PREX2	Endothelial	0.265163	0.0241616	0.101353	0.0324306	Epithelial	0.90915	3.42865	0
DEPP1	Endothelial	0.351571	0.0660981	0.131522	0.075893	Epithelial	0.906502	2.57843	0
CLDN4	Epithelial	0.737266	0.00847441	0.0213439	0.0305816	Neural	2.57111	3.48736	0
UGT2B7	Epithelial	0.65172	0.00197801	0.0572189	0.0216873	Metanephros	2.49676	3.83103	0
CLDN3	Epithelial	0.851018	0.0331414	0.234198	0.0579508	Metanephros	2.42384	2.84816	0
CD24	Epithelial	0.886249	0.0435033	0.687747	0.0690671	Neural	2.36866	2.67268	0
FOLR1	Epithelial	0.644591	0.00791204	0.224218	0.0272251	Metanephros	2.32286	3.60362	0
CLDN7	Epithelial	0.629714	0.0126664	0.239726	0.0313839	Germ cells	2.17973	3.46146	0
PAX8	Epithelial	0.819713	0.0486745	0.250166	0.0720632	Metanephros	2.15602	2.63021	0
ELF3	Epithelial	0.648517	0.0188654	0.133825	0.0379653	Germ cells	2.12135	3.27108	0
PNOC	Epithelial	0.587871	0.00978985	0.047496	0.0273253	Coel Epi	2.1163	3.59994	0
PERP	Epithelial	0.683542	0.0257852	0.290752	0.0457376	Metanephros	2.10861	3.08483	0
RAB25	Epithelial	0.553776	0.00867803	0.0822796	0.025213	Germ cells	2.03811	3.68039	0
DCDC2	Epithelial	0.682199	0.0319099	0.287425	0.0516358	Metanephros	2.02172	2.96354	0
HPN	Epithelial	0.535283	0.00700707	0.0741605	0.0230318	Coel Epi	2.01849	3.77088	0
SCGB2A1	Epithelial	0.487964	0.00156754	0.00806452	0.0163219	PV	2.00809	4.11525	0
ERP27	Epithelial	0.486517	0.00328699	0.00864937	0.0179453	Metanephros	1.95601	4.02043	0
KRT7	Epithelial	0.51307	0.00706847	0.0697442	0.0224175	Coel Epi	1.94859	3.79791	0
MSLN	Epithelial	0.625375	0.0342435	0.51579	0.0521748	Coel Epi	1.84683	2.95315	0
S100A14	Epithelial	0.452216	0.00354878	0.0231647	0.0171587	Coel Epi	1.83837	4.06525	0
AP1M2	Epithelial	0.495609	0.00990944	0.167369	0.0246426	Germ cells	1.83538	3.70328	0
KIF12	Epithelial	0.518442	0.0153716	0.167633	0.0306317	Germ cells	1.80714	3.48572	0
PAX2	Epithelial	0.442918	0.00476403	0.121756	0.018055	Metanephros	1.77802	4.01433	0
LHX1	Epithelial	0.42618	0.0030866	0.0838323	0.0159207	Metanephros	1.76444	4.14013	0
PART1	Epithelial	0.44612	0.00736259	0.0526882	0.0206719	PV	1.73049	3.87898	0
MECOM	Epithelial	0.486001	0.0141951	0.257033	0.0285069	Endothelial	1.729	3.55761	0
WFDC2	Epithelial	0.807935	0.0981668	0.262065	0.119697	Sertoli	1.71508	2.12279	0
MUC1	Epithelial	0.408927	0.00291853	0.0127688	0.0152344	PV	1.71103	4.1842	0
FOXJ1	Epithelial	0.411509	0.00397541	0.0618762	0.0163375	Metanephros	1.69307	4.11429	0
ASRGL1	Epithelial	0.65544	0.0606848	0.555146	0.0787261	Germ cells	1.66598	2.54178	0
KRT19	Epithelial	0.850604	0.11891	0.92409	0.141105	Coel Epi	1.6657	1.95825	0
TMEM139	Epithelial	0.390433	0.00465737	0.147705	0.0163595	Metanephros	1.60583	4.11295	0
EHF	Epithelial	0.353446	0.0010795	0.0047043	0.0117682	PV	1.57013	4.44236	0
MPZL2	Epithelial	0.378861	0.004499	0.020095	0.0158549	Endothelial	1.57011	4.14428	0
EPCAM	Epithelial	0.868065	0.146547	0.670618	0.168434	Germ cells	1.54621	1.78121	0
RBM47	Epithelial	0.505321	0.0331898	0.182277	0.0475114	Immune	1.5396	3.04678	0
LYPD6B	Epithelial	0.378965	0.00588878	0.017738	0.0172057	Germ cells	1.53955	4.06252	0
SOX17	Epithelial	0.516376	0.0379215	0.461089	0.052435	Endothelial	1.52237	2.94818	0
MAL2	Epithelial	0.475359	0.0280541	0.312043	0.0416227	Metanephros	1.51122	3.17911	0
CLDN6	Epithelial	0.371836	0.00653196	0.139533	0.0176131	Germ cells	1.50189	4.03911	0
SPINT1	Epithelial	0.57351	0.0584288	0.33588	0.0740533	Germ cells	1.49283	2.60297	0
MMP7	Epithelial	0.34456	0.00309306	0.00478808	0.0134511	Doublets	1.4846	4.30869	0
KLF5	Epithelial	0.538072	0.0511438	0.275202	0.0659143	Germ cells	1.46323	2.7194	0
PRSS8	Epithelial	0.495299	0.0397218	0.122435	0.0535413	Supporting	1.44989	2.9273	0
HNF1B	Epithelial	0.325034	0.00214284	0.0359281	0.0119374	Metanephros	1.43927	4.42808	0
ARL4C	Epithelial	0.533526	0.0553843	0.171189	0.0698882	Supporting	1.41964	2.66086	0
DAPL1	Epithelial	0.379998	0.01287	0.0552229	0.0240064	Metanephros	1.41718	3.72943	0
VAMP8	Epithelial	0.635913	0.092236	0.691949	0.108728	Metanephros	1.41103	2.21891	0
CMTM7	Epithelial	0.651514	0.0987162	0.343533	0.115485	Endothelial	1.40637	2.15862	0
GALNT3	Epithelial	0.36574	0.0109695	0.0267597	0.0217312	Immune	1.40042	3.82901	0
TMC4	Epithelial	0.367497	0.0116774	0.0295699	0.0224708	PV	1.39485	3.79554	0
EPS8L1	Epithelial	0.422151	0.0250095	0.335139	0.0370564	Coel Epi	1.39112	3.29531	0
HOXB2	Epithelial	0.51276	0.0524916	0.374704	0.0664533	Neural	1.39022	2.71126	0
CAPS	Epithelial	0.369666	0.0125888	0.0445775	0.0234204	Metanephros	1.38778	3.75415	0
AC022613.1	Epithelial	0.416572	0.023888	0.0741605	0.0357997	Coel Epi	1.38711	3.32982	0
ANKRD65	Epithelial	0.436719	0.02978	0.208916	0.0421241	Metanephros	1.38315	3.16714	0
ANXA3	Epithelial	0.467714	0.0395052	0.284393	0.0524945	Coel Epi	1.37837	2.94705	0
RASSF7	Epithelial	0.658023	0.109072	0.558537	0.125724	Coel Epi	1.36452	2.07367	0
SLPI	Epithelial	0.298688	0.00141563	0.0100475	0.0104331	Endothelial	1.36285	4.56277	0
LHX1-DT	Epithelial	0.294968	0.0010795	0.0432468	0.00999433	Metanephros	1.35855	4.60574	0
SLC34A2	Epithelial	0.40686	0.0239009	0.255479	0.0355176	Coel Epi	1.35799	3.33773	0
C19orf33	Epithelial	0.447877	0.0362603	0.220565	0.0487462	Coel Epi	1.35309	3.02113	0
CCDC198	Epithelial	0.28381	0.000869419	0.0206254	0.00945215	Metanephros	1.32299	4.66151	0
SCGB1D2	Epithelial	0.28753	0.00138008	0.0168599	0.0100601	Germ cells	1.3224	4.59917	0
DNAJB13	Epithelial	0.294555	0.00287975	0.0267826	0.0117274	Germ cells	1.30954	4.44582	0
CRB3	Epithelial	0.289906	0.00254038	0.0213316	0.0112573	Coel Epi	1.30073	4.48674	0
HMGA1	Epithelial	0.676516	0.130248	0.818669	0.146819	Germ cells	1.29794	1.91856	0
ADAM28	Epithelial	0.304267	0.00500966	0.136513	0.0140873	Immune	1.29693	4.26248	0
RNASET2	Epithelial	0.787581	0.175461	0.572232	0.194029	Immune	1.29143	1.63975	0
EPS8L2	Epithelial	0.476289	0.0538296	0.211732	0.0666445	Coel Epi	1.28997	2.70838	0
ST14	Epithelial	0.340634	0.0127795	0.0487372	0.0227246	Supporting	1.28906	3.78431	0
GRB7	Epithelial	0.508937	0.0674559	0.359803	0.0808478	Coel Epi	1.28007	2.51519	0
LYPD1	Epithelial	0.606881	0.107087	0.303963	0.122248	Supporting	1.27548	2.1017	0
CDH6	Epithelial	0.400145	0.030226	0.381028	0.0414472	Neural	1.27379	3.18334	0
STON2	Epithelial	0.358301	0.0191563	0.457086	0.0294439	Metanephros	1.26311	3.52527	0
CRIP2	Epithelial	0.789544	0.183767	0.854129	0.202143	Endothelial	1.26231	1.59878	0
TOM1L1	Epithelial	0.496126	0.065604	0.223398	0.0786634	Coel Epi	1.26144	2.54258	0
RNF144B	Epithelial	0.320901	0.0102941	0.100658	0.019716	Endothelial	1.25996	3.92632	0
WNT7A	Epithelial	0.259634	0.000446022	0.00289779	0.00830824	Germ cells	1.24378	4.79051	0
CLDN10	Epithelial	0.350243	0.018846	0.173692	0.0288986	Germ cells	1.24125	3.54396	0
SMIM24	Epithelial	0.324414	0.0128441	0.0725773	0.0222953	Coel Epi	1.23387	3.80338	0
UCP2	Epithelial	0.554499	0.0958623	0.500873	0.109775	Immune	1.22507	2.20933	0
MT1F	Epithelial	0.511416	0.0804455	0.35447	0.0935186	Coel Epi	1.21185	2.3696	0
SORBS2	Epithelial	0.45077	0.0566286	0.166403	0.0685845	Neural	1.20792	2.67969	0
ANXA1	Epithelial	0.470813	0.0667417	0.574185	0.0789987	Metanephros	1.19508	2.53832	0
CYBA	Epithelial	0.811344	0.212135	0.739771	0.230311	Immune	1.19132	1.46832	0
LCN12	Epithelial	0.312946	0.0137556	0.0437764	0.0228312	Supporting	1.18282	3.77963	0
SYK	Epithelial	0.359025	0.0276372	0.314718	0.0376895	Immune	1.17702	3.27837	0
C1orf210	Epithelial	0.249923	0.0014932	0.00683276	0.00902906	Coel Epi	1.17646	4.70731	0
SCNN1A	Epithelial	0.255398	0.00249837	0.0240604	0.0101698	Germ cells	1.17185	4.58833	0
ERBB4	Epithelial	0.453043	0.0638748	0.319361	0.0756798	Metanephros	1.16941	2.58124	0
HOXB4	Epithelial	0.350346	0.0272364	0.147826	0.0370376	Neural	1.15468	3.29582	0
GJB1	Epithelial	0.364191	0.0334872	0.200392	0.0435187	Sertoli	1.14158	3.13456	0
CYYR1	Epithelial	0.495816	0.0890427	0.616642	0.101382	Endothelial	1.13485	2.28886	0
SYNGR2	Epithelial	0.69191	0.179013	0.622089	0.194571	Metanephros	1.13263	1.63696	0
ANXA11	Epithelial	0.695423	0.180849	0.485043	0.196458	Coel Epi	1.13167	1.62731	0
PCP4	Epithelial	0.515239	0.0989328	0.331013	0.111561	Supporting	1.13001	2.19318	0
GCHFR	Epithelial	0.491166	0.0882864	0.191984	0.100507	Coel Epi	1.12847	2.29752	0
SH3YL1	Epithelial	0.540345	0.111751	0.265982	0.124752	Germ cells	1.12469	2.08143	0
EMX2OS	Epithelial	0.607191	0.144867	0.470877	0.158891	Coel Epi	1.11695	1.83954	0
PPP2R2B	Epithelial	0.339498	0.0278861	0.325349	0.0373385	Metanephros	1.11618	3.28773	0
FAM3B	Epithelial	0.257775	0.0059308	0.0739105	0.0135702	Coel Epi	1.1084	4.29988	0
JUP	Epithelial	0.737886	0.209931	0.61171	0.225946	Endothelial	1.09758	1.48746	0
HSBP1L1	Epithelial	0.418742	0.0619065	0.335722	0.0727307	Coel Epi	1.09752	2.62099	0
DMKN	Epithelial	0.747185	0.214934	0.707191	0.231079	Coel Epi	1.09462	1.46499	0
RAI2	Epithelial	0.373282	0.0433708	0.0805108	0.0533783	PV	1.09385	2.93035	0
SLC44A4	Epithelial	0.289183	0.0148706	0.0324973	0.0231916	Coel Epi	1.08847	3.76396	0
CXADR	Epithelial	0.515652	0.109056	0.525615	0.121389	Metanephros	1.08738	2.10875	0
KRTCAP3	Epithelial	0.359955	0.0394471	0.324377	0.0491693	Germ cells	1.08436	3.01249	0
PSAT1	Epithelial	0.734683	0.212772	0.447129	0.228603	Supporting	1.08422	1.47577	0
CDH16	Epithelial	0.217791	0.000436326	0.00399202	0.00702956	Metanephros	1.07973	4.95763	0
EMX2	Epithelial	0.771361	0.231117	0.71544	0.247505	Coel Epi	1.07707	1.39633	0
TNFRSF12A	Epithelial	0.407893	0.062624	0.212804	0.0730974	Doublets	1.06703	2.61596	0
ADGRG2	Epithelial	0.254985	0.00805748	0.0332472	0.0155478	Coel Epi	1.06172	4.16384	0
PAM	Epithelial	0.626718	0.170264	0.402357	0.18411	Endothelial	1.06055	1.69222	0
CD9	Epithelial	0.751731	0.228092	0.611609	0.243976	Germ cells	1.06046	1.41069	0
C2orf88	Epithelial	0.316355	0.0266062	0.132292	0.0353954	Erythroid	1.057	3.34117	0
KIAA1217	Epithelial	0.541792	0.129695	0.24573	0.142196	Coel Epi	1.05679	1.95055	0
FZD6	Epithelial	0.339188	0.0354458	0.161399	0.0446595	Endothelial	1.05443	3.10869	0
SYNE4	Epithelial	0.227296	0.00297994	0.0172987	0.00978435	Metanephros	1.05169	4.62697	0
PDLIM1	Epithelial	0.438682	0.0804649	0.678226	0.091331	PV	1.04988	2.39326	0
LRRTM1	Epithelial	0.475256	0.0992043	0.328454	0.110611	Supporting	1.04639	2.20173	0
CAPG	Epithelial	0.630954	0.176799	0.436336	0.190575	Germ cells	1.04594	1.65771	0
HOOK1	Epithelial	0.394462	0.0607301	0.250896	0.0708535	Coel Epi	1.0442	2.64714	0
PRR15L	Epithelial	0.214485	0.00146088	0.0250812	0.00792275	Coel Epi	1.03768	4.83802	0
PKP3	Epithelial	0.230086	0.00420812	0.0322269	0.0110599	Germ cells	1.03641	4.50443	0
LINC01829	Epithelial	0.257775	0.0105591	0.0646613	0.0180581	Coel Epi	1.03475	4.01416	0
TSPO	Epithelial	0.640149	0.18571	0.572159	0.199495	Endothelial	1.0319	1.61197	0
PKP2	Epithelial	0.515859	0.124786	0.342638	0.136649	Coel Epi	1.02674	1.99034	0
PARD6B	Epithelial	0.385784	0.0602679	0.307385	0.0701421	Metanephros	1.02512	2.65723	0
DOK5	Epithelial	0.394772	0.0645471	0.220815	0.0745641	Coel Epi	1.02487	2.5961	0
S100A1	Epithelial	0.254778	0.0106366	0.0718563	0.0180424	Metanephros	1.02294	4.01503	0
AC004540.2	Epithelial	0.259944	0.0122203	0.220553	0.0197348	Neural	1.02038	3.92537	0
CNDP2	Epithelial	0.603265	0.172038	0.409182	0.185119	Metanephros	1.01756	1.68676	0
KLK11	Epithelial	0.32741	0.0359112	0.747438	0.0447535	Coel Epi	1.01713	3.10659	0
CDH1	Epithelial	0.349313	0.0451936	0.185758	0.0544188	Supporting	1.01687	2.91105	0
MAPK15	Epithelial	0.235975	0.00649317	0.087159	0.0134543	Metanephros	1.01669	4.30846	0
RGL3	Epithelial	0.244447	0.00858107	0.11679	0.0157358	Germ cells	1.0149	4.15182	0
CCDC146	Epithelial	0.299618	0.0261537	0.0668247	0.0344489	Germ cells	1.0092	3.36828	0
FILIP1	Epithelial	0.317388	0.033151	0.274462	0.0417731	PV	1.00787	3.1755	0
LINC02381	Epithelial	0.567207	0.157022	0.591304	0.169465	Neural	1.00686	1.77511	0
EYA4	Epithelial	0.271412	0.0169488	0.0924901	0.0246677	Neural	1.00484	3.70226	0
ESRP1	Epithelial	0.274305	0.0188008	0.261064	0.0265513	Germ cells	0.995365	3.62868	0
MST1	Epithelial	0.422358	0.0846924	0.298308	0.0949351	Coel Epi	0.994467	2.35456	0
SPINT1-AS1	Epithelial	0.260874	0.0146508	0.0432468	0.0221198	Metanephros	0.994265	3.81128	0
RGS10	Epithelial	0.480835	0.115565	0.567772	0.126645	Immune	0.993581	2.06637	0
KCTD1	Epithelial	0.386094	0.066732	0.16996	0.0764195	Neural	0.992847	2.57152	0
SMIM6	Epithelial	0.202707	0.00135746	0.0154987	0.00746519	Coel Epi	0.992758	4.8975	0
CREG1	Epithelial	0.570307	0.16306	0.483052	0.175413	Germ cells	0.992683	1.74061	0
KRT18	Epithelial	0.911354	0.318692	0.886009	0.33667	Coel Epi	0.992148	1.08865	0
PTGS1	Epithelial	0.41089	0.0794727	0.531206	0.0895259	Coel Epi	0.99157	2.41323	0
AIG1	Epithelial	0.61091	0.184433	0.389887	0.19737	Metanephros	0.991309	1.62268	0
CXXC5	Epithelial	0.728898	0.242054	0.730539	0.256822	Metanephros	0.990843	1.35937	0
GPRC5C	Epithelial	0.472466	0.112223	0.334738	0.123151	Germ cells	0.989508	2.09435	0
KIF9	Epithelial	0.460378	0.106105	0.394099	0.116851	Germ cells	0.988365	2.14685	0
MAP7	Epithelial	0.273065	0.0192177	0.160608	0.0269179	Germ cells	0.987121	3.61496	0
CA2	Epithelial	0.253022	0.0130057	0.0864937	0.0202864	Metanephros	0.986231	3.89781	0
FXYD2	Epithelial	0.241037	0.00994822	0.0174985	0.0169581	Coel Epi	0.982712	4.07701	0
ICA1	Epithelial	0.353756	0.0531024	0.433992	0.0622224	Neural	0.982393	2.77704	0
HOXB3	Epithelial	0.273272	0.0199126	0.105725	0.027598	Germ cells	0.98105	3.59001	0
LMO7	Epithelial	0.387127	0.0698767	0.172287	0.0795002	Germ cells	0.980203	2.532	0
RASSF9	Epithelial	0.281124	0.0234743	0.241688	0.0312899	Endothelial	0.973943	3.46446	0
AGPAT2	Epithelial	0.475359	0.118315	0.287583	0.129146	Germ cells	0.972971	2.04681	0
WDR91	Epithelial	0.356752	0.0564153	0.187829	0.0655257	Germ cells	0.97226	2.72531	0
SHMT1	Epithelial	0.409856	0.083587	0.378644	0.0934841	Germ cells	0.971345	2.36996	0
DNALI1	Epithelial	0.46792	0.114809	0.279441	0.12552	Metanephros	0.971071	2.07529	0
TSTD1	Epithelial	0.753177	0.260945	0.571742	0.275877	Germ cells	0.969942	1.2878	0
DSC2	Epithelial	0.476289	0.119851	0.53493	0.130663	Metanephros	0.969313	2.03514	0
DDAH1	Epithelial	0.398182	0.0781669	0.205888	0.0878742	Doublets	0.968317	2.43185	0
CRYL1	Epithelial	0.441265	0.10146	0.225565	0.111768	Coel Epi	0.966957	2.19133	0
DSP	Epithelial	0.46823	0.116502	0.355737	0.127171	Doublets	0.965593	2.06222	0
ANXA2	Epithelial	0.822709	0.293712	0.876913	0.309758	Metanephros	0.964184	1.17196	0
ID4	Epithelial	0.69284	0.23515	0.705921	0.249034	Metanephros	0.963163	1.39017	0
SLC44A3	Epithelial	0.261494	0.017773	0.128458	0.025166	Neural	0.962889	3.68226	0
TES	Epithelial	0.482798	0.126176	0.333806	0.136993	Coel Epi	0.959716	1.98782	0
CDH2	Epithelial	0.567621	0.173738	0.458103	0.185686	Neural	0.955701	1.6837	0
EFNB2	Epithelial	0.491683	0.132436	0.555261	0.143334	Endothelial	0.955134	1.94258	0
KLHL14	Epithelial	0.212625	0.0049935	0.0532269	0.0112918	Metanephros	0.953343	4.48368	0
KCNJ15	Epithelial	0.194028	0.00153199	0.00876872	0.00737117	Endothelial	0.952714	4.91018	0
SKAP1	Epithelial	0.22492	0.00801546	0.10915	0.014595	Germ cells	0.950753	4.22707	0
TPD52L1	Epithelial	0.55171	0.16698	0.687276	0.178651	Coel Epi	0.950223	1.72232	0
RSPH1	Epithelial	0.22616	0.00836775	0.0571654	0.0149743	Germ cells	0.950193	4.20142	0
LINC01139	Epithelial	0.259738	0.0185099	0.0784935	0.0258273	Coel Epi	0.949685	3.65632	0
EIF4EBP3	Epithelial	0.315219	0.041173	0.322269	0.0494859	Germ cells	0.947568	3.00607	0
NET1	Epithelial	0.593656	0.19069	0.451478	0.202914	PV	0.946866	1.59497	0
TMEM45B	Epithelial	0.194028	0.00181641	0.0217773	0.00764696	Germ cells	0.945587	4.87345	0
PTGR1	Epithelial	0.681475	0.236657	0.50499	0.25015	Metanephros	0.944318	1.3857	0
LINC00472	Epithelial	0.314082	0.0412764	0.565536	0.0495517	Metanephros	0.943735	3.00474	0
LAD1	Epithelial	0.204773	0.00388168	0.0556726	0.00997552	Germ cells	0.943517	4.60762	0
TACSTD2	Epithelial	0.276062	0.0252552	0.136726	0.0328631	Doublets	0.942862	3.4154	0
RASSF10	Epithelial	0.20343	0.00373301	0.120426	0.00979062	Metanephros	0.941135	4.62633	0
PRKX	Epithelial	0.313152	0.0413507	0.168686	0.0495956	Germ cells	0.940663	3.00385	0
MARVELD3	Epithelial	0.195681	0.00234646	0.0249385	0.00821108	Germ cells	0.939715	4.80227	0
FAH	Epithelial	0.420291	0.0975753	0.207585	0.107365	Metanephros	0.937891	2.23152	0
PPP1R16A	Epithelial	0.632503	0.214973	0.483699	0.227638	Metanephros	0.936104	1.48	0
ITGB8	Epithelial	0.318628	0.0446797	0.25682	0.0529897	Metanephros	0.93602	2.93766	0
ANXA4	Epithelial	0.578366	0.18634	0.462211	0.198232	Coel Epi	0.935979	1.61832	0
WDR72	Epithelial	0.219341	0.0076761	0.172199	0.0140967	Germ cells	0.934789	4.26181	0
S100A4	Epithelial	0.374006	0.0732025	0.421823	0.0823271	Metanephros	0.933913	2.49706	0
NEDD9	Epithelial	0.369253	0.0709401	0.381903	0.0799891	Metanephros	0.932683	2.52586	0
KRT8	Epithelial	0.908668	0.341468	0.908924	0.358674	Coel Epi	0.931696	1.02534	0
SLC38A1	Epithelial	0.433103	0.106622	0.376052	0.116525	Coel Epi	0.931018	2.14965	0
ALAS2	Erythroid	0.932238	0.0178433	0.0812067	0.0391155	Epithelial	3.0216	3.24124	0
AHSP	Erythroid	0.847905	0.0123148	0.0375039	0.0317537	Epithelial	2.92506	3.44975	0
HBM	Erythroid	0.879159	0.0175	0.0661225	0.0375453	Epithelial	2.88558	3.28221	0
SLC4A1	Erythroid	0.680453	0.00428996	0.0208699	0.02002	Epithelial	2.66127	3.91102	0
AC104389.4	Erythroid	0.754681	0.0147084	0.0647794	0.0319229	Epithelial	2.59945	3.44443	0
HEMGN	Erythroid	0.649198	0.00482259	0.0216965	0.0198132	Epithelial	2.54577	3.92141	0
GYPB	Erythroid	0.628183	0.00342683	0.0142577	0.017961	Epithelial	2.52501	4.01955	0
HBZ	Erythroid	0.747272	0.0213952	0.117391	0.0382818	Neural	2.43818	3.26278	0
HBA1	Erythroid	0.99515	0.0672275	0.154355	0.0888144	Epithelial	2.40946	2.42121	0
MYL4	Erythroid	0.60811	0.00711678	0.163673	0.0210981	Metanephros	2.34644	3.85857	0
PHOSPHO1	Erythroid	0.587094	0.00493169	0.0256225	0.0184749	Epithelial	2.34329	3.99134	0
GYPA	Erythroid	0.557187	0.00251879	0.0110549	0.0154224	Epithelial	2.32455	4.17193	0
HBA2	Erythroid	0.994072	0.0792343	0.190412	0.100517	Epithelial	2.28381	2.29743	0
HBQ1	Erythroid	0.656338	0.0167395	0.194679	0.0316189	Germ cells	2.26699	3.454	0
HBG1	Erythroid	0.934528	0.0689859	0.0910669	0.0891216	Endothelial	2.25946	2.41775	0
EPB42	Erythroid	0.587498	0.00907405	0.129906	0.0225303	Coel Epi	2.22832	3.79289	0
TRIM58	Erythroid	0.631012	0.0156646	0.127942	0.0299798	Germ cells	2.2131	3.50723	0
HBG2	Erythroid	0.98801	0.0966925	0.195991	0.117428	Epithelial	2.11625	2.14193	0
SNCA	Erythroid	0.924289	0.0953898	0.644045	0.114673	Metanephros	2.00171	2.16567	0
TENT5C	Erythroid	0.684629	0.0522785	0.172111	0.0669893	Germ cells	1.8507	2.70322	0
DMTN	Erythroid	0.592213	0.0312971	0.163757	0.0443461	Epithelial	1.84518	3.11573	0
BPGM	Erythroid	0.753469	0.072063	0.288901	0.087915	Germ cells	1.83197	2.43139	0
HBB	Erythroid	0.904486	0.114613	0.311292	0.132988	Epithelial	1.8248	2.0175	0
NFE2	Erythroid	0.458844	0.00985696	0.0440815	0.0203021	Germ cells	1.78813	3.89703	0
MPP1	Erythroid	0.741749	0.0864184	0.273609	0.101664	Immune	1.6957	2.28608	0
FECH	Erythroid	0.716961	0.0912057	0.184668	0.105763	Germ cells	1.61069	2.24655	0
KLF1	Erythroid	0.321703	0.000949759	0.00717471	0.00841166	Immune	1.53714	4.77814	0
ANK1	Erythroid	0.330325	0.00412311	0.022392	0.0117118	Germ cells	1.46901	4.44716	0
BCL2L1	Erythroid	0.764381	0.139855	0.477839	0.154384	Epithelial	1.4281	1.86831	0
DCAF12	Erythroid	0.811262	0.162425	0.44582	0.177519	Germ cells	1.40241	1.72868	0
STRADB	Erythroid	0.730298	0.134006	0.503337	0.147878	Germ cells	1.39587	1.91137	0
TMOD1	Erythroid	0.380439	0.0202145	0.223715	0.0285946	Neural	1.35229	3.55454	0
SLC25A37	Erythroid	0.991109	0.238502	0.433527	0.25601	Germ cells	1.35042	1.36254	0
PCGF5	Erythroid	0.57699	0.0854141	0.280998	0.09685	Germ cells	1.34704	2.33459	0
LYL1	Erythroid	0.387175	0.0235964	0.328553	0.0320546	Endothelial	1.332	3.44032	0
R3HDM4	Erythroid	0.72208	0.156415	0.296208	0.169574	Epithelial	1.2813	1.77446	0
CR1L	Erythroid	0.255826	0.00169737	0.010125	0.00760935	Epithelial	1.24802	4.87838	0
BLVRB	Erythroid	0.882258	0.229623	0.5109	0.244806	Epithelial	1.24159	1.40729	0
AC104389.5	Erythroid	0.266065	0.00361935	0.00706424	0.0097248	Sertoli	1.2327	4.63308	0
GATA1	Erythroid	0.241681	0.000917673	0.0162885	0.00651872	Immune	1.2164	5.03308	0
C17orf99	Erythroid	0.238987	0.000901629	0.00568241	0.00644037	Epithelial	1.20573	5.04517	0
CDKN2D	Erythroid	0.467331	0.067911	0.344222	0.077203	Germ cells	1.19698	2.56132	0
RHAG	Erythroid	0.23535	0.000792535	0.00814427	0.0062492	Immune	1.19447	5.0753	0
RBM38	Erythroid	0.615115	0.134837	0.401198	0.14601	Metanephros	1.18353	1.92408	0
KRT1	Erythroid	0.232386	0.00177438	0.00971175	0.00713925	Epithelial	1.14848	4.94215	0
RGCC	Erythroid	0.367776	0.0363347	0.500183	0.0440452	Endothelial	1.14839	3.12254	0
EPB41	Erythroid	0.567291	0.122975	0.530295	0.133311	Germ cells	1.14313	2.01507	0
RUNDC3A	Erythroid	0.271858	0.00945267	0.224506	0.0155572	Neural	1.13181	4.16323	0
CCNDBP1	Erythroid	0.63411	0.157211	0.593783	0.168305	Germ cells	1.12997	1.78198	0
NCOA4	Erythroid	0.829314	0.246655	0.462341	0.26021	Epithelial	1.11648	1.34627	0
GYPE	Erythroid	0.217971	0.00102035	0.00444261	0.00606742	Epithelial	1.1127	5.10482	0
ADIPOR1	Erythroid	0.863936	0.272581	0.477942	0.286338	Epithelial	1.08042	1.25058	0
RHD	Erythroid	0.208406	0.00092409	0.00605901	0.00575089	Germ cells	1.07504	5.1584	0
HAGH	Erythroid	0.597063	0.156598	0.529417	0.166845	Germ cells	1.06916	1.79069	0
UCP2	Erythroid	0.480129	0.100954	0.554499	0.109775	Epithelial	1.06076	2.20933	0
XK	Erythroid	0.235754	0.00584936	0.0762206	0.0111978	Germ cells	1.05902	4.49204	0
MAP2K3	Erythroid	0.409538	0.0690725	0.274615	0.076993	Epithelial	1.05007	2.56404	0
GMPR	Erythroid	0.552741	0.141845	0.367807	0.151404	Epithelial	1.04347	1.88781	0
NPL	Erythroid	0.262428	0.0129982	0.229203	0.0188009	Immune	1.04285	3.97385	0
SMOX	Erythroid	0.426243	0.0791541	0.154636	0.0872286	Germ cells	1.0397	2.43922	0
SELENBP1	Erythroid	0.723427	0.22637	0.422548	0.237933	Coel Epi	1.03867	1.43576	0
TESC	Erythroid	0.490233	0.111757	0.296767	0.120562	Endothelial	1.03713	2.11559	0
SPTA1	Erythroid	0.202479	0.00133159	0.00833818	0.00601101	Immune	1.03551	5.11416	0
TANGO2	Erythroid	0.293682	0.0235322	0.0957921	0.0298169	Immune	1.03161	3.51268	0
TCP11L2	Erythroid	0.332211	0.0392032	0.109825	0.0460197	Epithelial	1.02277	3.07869	0
SLC14A1	Erythroid	0.235484	0.00809541	0.0863171	0.0133853	Endothelial	1.01578	4.3136	0
AC130456.3	Erythroid	0.193722	0.00104281	0.00557909	0.00552524	Epithelial	1.00705	5.19843	0
HMBS	Erythroid	0.445777	0.0965899	0.365033	0.104713	Germ cells	1.00591	2.25653	0
SMIM5	Erythroid	0.234811	0.0109351	0.0395702	0.0161432	Epithelial	0.968889	4.12625	0
HBE1	Erythroid	0.240873	0.0128217	0.113439	0.0181271	Neural	0.965985	4.01035	0
FAM210B	Erythroid	0.891419	0.32527	0.702303	0.338441	Supporting	0.965769	1.08341	0
TAL1	Erythroid	0.213121	0.00615418	0.136555	0.010969	Endothelial	0.961749	4.51268	0
OSBP2	Erythroid	0.242759	0.0145448	0.0501085	0.0198539	Epithelial	0.951459	3.91936	0
ESPN	Erythroid	0.240199	0.0144132	0.0671557	0.0196659	Epithelial	0.943713	3.92887	0
RGS10	Erythroid	0.456015	0.1188	0.567772	0.126645	Immune	0.942295	2.06637	0
GYPC	Erythroid	0.900714	0.34046	0.663226	0.353493	Endothelial	0.936644	1.03989	0
SLC25A39	Erythroid	0.943284	0.360713	0.73314	0.374265	Germ cells	0.92705	0.98279	0
PIM1	Erythroid	0.53927	0.17489	0.349097	0.183367	Supporting	0.914744	1.69626	0
PNP	Erythroid	0.324397	0.0555128	0.260667	0.061768	Epithelial	0.903242	2.78437	0
CHPT1	Erythroid	0.450896	0.13417	0.352628	0.141538	Metanephros	0.881587	1.95519	0
FBXO7	Erythroid	0.757376	0.301648	0.698015	0.31225	Germ cells	0.881549	1.16395	0
NUDT4	Erythroid	0.61781	0.231966	0.509763	0.240942	Epithelial	0.879266	1.4232	0
TMEM56	Erythroid	0.334636	0.0691046	0.157829	0.0752818	Doublets	0.86554	2.58652	0
YOD1	Erythroid	0.272935	0.0378748	0.0851328	0.0433432	Epithelial	0.856637	3.1386	0
2021-03-02	Erythroid	0.301495	0.0526346	0.178975	0.058424	Metanephros	0.856255	2.84003	0
RIOK3	Erythroid	0.521757	0.189387	0.348383	0.197119	Epithelial	0.847305	1.62395	0
FAM104A	Erythroid	0.443621	0.145576	0.44582	0.15251	Germ cells	0.834241	1.88053	0
HPS1	Erythroid	0.423818	0.134449	0.326687	0.14118	Epithelial	0.829715	1.95772	0
TMCC2	Erythroid	0.217028	0.0189085	0.0743765	0.0235175	Germ cells	0.813857	3.75001	0
TSPO2	Erythroid	0.14482	0.000282361	0.00196301	0.00364484	Epithelial	0.813084	5.61444	0
MKRN1	Erythroid	0.709956	0.310635	0.663681	0.319925	Germ cells	0.809114	1.13967	0
RNF10	Erythroid	0.690152	0.302222	0.560678	0.311247	Germ cells	0.805524	1.16717	0
ANKRD9	Erythroid	0.318065	0.0744502	0.225749	0.0801176	Doublets	0.80288	2.52426	0
MFSD2B	Erythroid	0.153173	0.00184818	0.00950165	0.00536854	Immune	0.800663	5.2272	0
SIAH2	Erythroid	0.425434	0.145936	0.301975	0.152438	Coel Epi	0.800242	1.881	0
RILP	Erythroid	0.223764	0.0248606	0.105499	0.0294878	Endothelial	0.788495	3.52378	0
CAT	Erythroid	0.52243	0.22301	0.570513	0.229976	Epithelial	0.767858	1.46978	0
TUBB1	Erythroid	0.13768	0.000869543	0.0112468	0.00405226	Immune	0.758409	5.50848	0
EIF2AK1	Erythroid	0.561498	0.255492	0.503771	0.26261	Epithelial	0.75077	1.33708	0
CNPPD1	Erythroid	0.451839	0.184439	0.534159	0.19066	Germ cells	0.748816	1.65726	0
SLC22A4	Erythroid	0.165162	0.00799274	0.0337845	0.0116491	Epithelial	0.73539	4.45253	0
PLEK2	Erythroid	0.170416	0.00978316	0.0628732	0.0135201	Germ cells	0.7334	4.30358	0
GPR146	Erythroid	0.236562	0.0410963	0.164414	0.0456436	Endothelial	0.730242	3.08689	0
SLC38A5	Erythroid	0.183618	0.0154657	0.131419	0.0193775	Epithelial	0.724125	3.94364	0
CISD2	Erythroid	0.554493	0.264973	0.465234	0.271708	Epithelial	0.722518	1.30303	0
MXI1	Erythroid	0.416139	0.172725	0.366463	0.178387	Epithelial	0.71734	1.7238	0
SPTB	Erythroid	0.167857	0.0104698	0.0571237	0.0141312	PV	0.714964	4.25937	0
YPEL4	Erythroid	0.155732	0.0073478	0.0418972	0.0107998	Neural	0.705191	4.52823	0
RHCE	Erythroid	0.166375	0.0118014	0.162276	0.0153973	Germ cells	0.694375	4.17356	0
GSPT1	Erythroid	0.571198	0.290877	0.531612	0.297398	Germ cells	0.692683	1.21268	0
2021-03-08	Erythroid	0.274956	0.0774054	0.234633	0.0820011	Germ cells	0.687672	2.50102	0
RNF11	Erythroid	0.504782	0.255014	0.449767	0.260824	Metanephros	0.678382	1.34391	0
GLRX5	Erythroid	0.703759	0.374828	0.499667	0.38248	Metanephros	0.676368	0.96108	0
RFESD	Erythroid	0.20679	0.034724	0.371444	0.0387268	Germ cells	0.672319	3.25122	0
KEL	Erythroid	0.172706	0.0176764	0.10516	0.021283	Doublets	0.664893	3.84985	0
MAP1LC3B	Erythroid	0.625892	0.340938	0.772568	0.347567	Germ cells	0.661442	1.0568	0
DCUN1D1	Erythroid	0.293817	0.102115	0.291798	0.106575	Germ cells	0.657828	2.23891	0
ISCA1	Erythroid	0.491311	0.25853	0.618282	0.263946	Germ cells	0.654432	1.33201	0
TRAK2	Erythroid	0.265122	0.0832611	0.19784	0.0874919	Germ cells	0.645892	2.43621	0
ACSL6	Erythroid	0.139027	0.00655205	0.023359	0.00963392	Supporting	0.64543	4.64247	0
CTSE	Erythroid	0.108447	0.000247066	0.00118577	0.00276419	Neural	0.638861	5.89101	0
CD36	Erythroid	0.20167	0.0396685	0.428738	0.0434372	Immune	0.632527	3.13644	0
PIM2	Erythroid	0.226458	0.0579963	0.340007	0.0619153	Germ cells	0.630004	2.78199	0
CPOX	Erythroid	0.247205	0.0750823	0.219968	0.0790865	Germ cells	0.627211	2.53721	0
ERMAP	Erythroid	0.202883	0.0417316	0.128629	0.0454806	Epithelial	0.627003	3.09047	0
IFIT1B	Erythroid	0.106695	0.000401081	0.00309949	0.00287388	Epithelial	0.624391	5.85209	0
STOM	Erythroid	0.340024	0.15784	0.588053	0.162078	Endothelial	0.618735	1.81968	1.27484e-313
TSPAN32	Erythroid	0.141048	0.00956497	0.0438239	0.0126238	Immune	0.616687	4.37218	0
YPEL3	Erythroid	0.576721	0.338685	0.609881	0.344223	Neural	0.615053	1.06647	0
SLC2A1	Erythroid	0.345413	0.165406	0.426904	0.169593	Epithelial	0.612884	1.77435	7.40396e-299
TMEM86B	Erythroid	0.141452	0.0103062	0.0221097	0.0133571	Epithelial	0.610466	4.31571	0
C9orf78	Erythroid	0.483363	0.281376	0.677204	0.286075	Germ cells	0.604929	1.2515	2.67014e-286
PITHD1	Erythroid	0.481746	0.280558	0.744292	0.285238	Germ cells	0.604317	1.25443	1.89521e-284
ACKR1	Erythroid	0.129867	0.00710073	0.159481	0.00995672	Endothelial	0.598621	4.60951	0
ICAM4	Erythroid	0.13539	0.00910614	0.0248206	0.012044	Immune	0.598314	4.41919	0
CREG1	Erythroid	0.343257	0.171415	0.570307	0.175413	Epithelial	0.597478	1.74061	6.76208e-269
USP12	Erythroid	0.231308	0.0718897	0.344573	0.0755984	Germ cells	0.597312	2.58232	0
CDC34	Erythroid	0.458171	0.267794	0.485695	0.272222	Metanephros	0.596142	1.30114	1.11985e-260
2021-03-03	Erythroid	0.226324	0.069926	0.235659	0.0735644	Endothelial	0.590613	2.60959	0
YBX3	Erythroid	0.640846	0.394872	0.658683	0.400594	Metanephros	0.58625	0.914806	0
DPM2	Erythroid	0.43446	0.25709	0.482385	0.261216	Epithelial	0.583223	1.34241	1.05818e-231
USP15	Erythroid	0.360771	0.195012	0.522392	0.198868	Germ cells	0.582686	1.61511	3.6678e-234
HBD	Erythroid	0.107638	0.00202466	0.0236595	0.00448162	Epithelial	0.582084	5.40777	0
SMIM1	Erythroid	0.463963	0.281328	0.564462	0.285576	Doublets	0.58146	1.25325	8.80921e-236
UBAC1	Erythroid	0.274417	0.116596	0.334563	0.120267	Germ cells	0.581227	2.11804	3.4395e-288
MOB1B	Erythroid	0.246531	0.0925919	0.315244	0.0961731	Germ cells	0.577279	2.34161	1.36896e-316
EMC3	Erythroid	0.416274	0.247505	0.589656	0.251431	Germ cells	0.574701	1.38058	1.98356e-214
FGFR1OP2	Erythroid	0.447932	0.275847	0.464963	0.279851	Germ cells	0.570441	1.2735	5.85874e-212
FBXO9	Erythroid	0.321703	0.168018	0.349491	0.171593	Germ cells	0.567043	1.76263	4.00332e-221
UBE2H	Erythroid	0.42732	0.261758	0.525261	0.26561	Epithelial	0.566511	1.32573	2.19486e-201
TMEM63B	Erythroid	0.264314	0.114507	0.277661	0.117992	Germ cells	0.564875	2.13714	2.63789e-265
RAP1GAP	Erythroid	0.166105	0.0316148	0.132968	0.0347435	Epithelial	0.558074	3.35976	0
HK1	Erythroid	0.299609	0.155061	0.271542	0.158424	Neural	0.552025	1.84248	6.13015e-207
CPEB4	Erythroid	0.198437	0.0595172	0.20825	0.062749	Metanephros	0.549396	2.76861	0
ARL4A	Erythroid	0.486865	0.320771	0.620698	0.324635	Coel Epi	0.547749	1.12505	1.24579e-186
WBP2	Erythroid	0.438637	0.284411	0.478149	0.287999	Epithelial	0.546014	1.2448	2.458e-169
TUBA4A	Erythroid	0.150344	0.0239205	0.228019	0.0268615	Epithelial	0.543802	3.61706	0
GLUL	Erythroid	0.726122	0.471462	0.727658	0.477387	Epithelial	0.536915	0.739429	0
CYSTM1	Erythroid	0.420046	0.281969	0.845263	0.285182	Coel Epi	0.527002	1.25463	2.93716e-137
NPRL3	Erythroid	0.324532	0.196019	0.476291	0.199009	Germ cells	0.523926	1.61441	1.20148e-144
FAXDC2	Erythroid	0.224842	0.0952615	0.193408	0.098276	Epithelial	0.521627	2.31998	2.79666e-229
TMEM158	Erythroid	0.190758	0.0634285	0.143321	0.0663907	Coel Epi	0.517375	2.7122	3.98391e-286
KLF3	Erythroid	0.342449	0.219122	0.452137	0.221991	Endothelial	0.515427	1.50512	1.46462e-125
TFR2	Erythroid	0.111006	0.00737347	0.0238638	0.00978435	Supporting	0.513623	4.62697	0
PIP4K2A	Erythroid	0.15223	0.0329592	0.111499	0.0357339	Immune	0.507177	3.33166	0
GFI1B	Erythroid	0.107773	0.00677987	0.0232894	0.00912934	Supporting	0.506131	4.69626	0
TRIM10	Erythroid	0.082177	0.000218188	0.00213302	0.00212485	Immune	0.505722	6.15405	0
MICAL2	Erythroid	0.206251	0.0833221	0.244547	0.0861819	Doublets	0.505582	2.4513	3.42481e-227
SLC1A5	Erythroid	0.299744	0.185415	0.267654	0.188075	Supporting	0.500847	1.67092	7.40434e-120
DCAF11	Erythroid	0.25879	0.142072	0.391673	0.144788	Epithelial	0.500109	1.93249	4.71201e-147
FKBP8	Erythroid	0.896942	0.565091	0.786032	0.572811	Epithelial	0.499776	0.5572	0
EPOR	Erythroid	0.170551	0.0508667	0.150988	0.053651	Neural	0.498905	2.92526	4.01739e-294
MT1H	Erythroid	0.0945709	0.00347175	0.038537	0.00559106	Epithelial	0.4905	5.18659	0
ST8SIA1	Erythroid	0.128924	0.0198166	0.134528	0.0223548	Germ cells	0.490002	3.80071	0
E2F2	Erythroid	0.118146	0.0140089	0.0498771	0.0164316	Germ cells	0.48541	4.10855	0
XPO7	Erythroid	0.217163	0.106142	0.244819	0.108725	Germ cells	0.48187	2.21894	5.6677e-162
RIPOR3	Erythroid	0.135525	0.0260927	0.127656	0.0286385	Coel Epi	0.48152	3.553	0
AC073349.1	Erythroid	0.0916072	0.00317335	0.0361784	0.00523065	Germ cells	0.481233	5.25322	0
ST6GALNAC4	Erythroid	0.262562	0.157596	0.289899	0.160038	Supporting	0.481105	1.83235	6.08707e-113
CTSB	Erythroid	0.453186	0.344413	0.717636	0.346943	Epithelial	0.47974	1.05859	1.58293e-79
RAB2B	Erythroid	0.199515	0.0879586	0.16412	0.0905538	Germ cells	0.479197	2.40181	1.14152e-184
PKLR	Erythroid	0.0781355	0.000372203	0.00836863	0.00218126	Epithelial	0.478803	6.12785	0
NARF	Erythroid	0.37532	0.278238	0.729803	0.280496	Germ cells	0.477105	1.2712	8.64977e-70
AL139220.2	Erythroid	0.117473	0.014856	0.0677419	0.0172433	PV	0.476978	4.06033	0
GCLC	Erythroid	0.172976	0.0627964	0.133366	0.0653596	Supporting	0.471852	2.72785	2.91918e-224
TALDO1	Erythroid	0.616193	0.468279	0.743478	0.47172	Neural	0.462988	0.751369	5.44183e-139
UBE2B	Erythroid	0.623468	0.473147	0.725676	0.476644	Germ cells	0.461981	0.740986	1.04718e-143
C11orf21	Erythroid	0.0790785	0.00109415	0.032771	0.00290835	Immune	0.461832	5.84017	0
RAD23A	Erythroid	0.645157	0.487127	0.701177	0.490803	Germ cells	0.459166	0.711712	1.38076e-159
PDCD10	Erythroid	0.349724	0.267216	0.623463	0.269135	Germ cells	0.459027	1.31254	5.88692e-52
GRAP2	Erythroid	0.0848713	0.00259579	0.0199729	0.00450983	Immune	0.458432	5.4015	0
ALAD	Erythroid	0.188334	0.0861425	0.191651	0.0885198	Coel Epi	0.45662	2.42453	5.04521e-160
ANXA7	Erythroid	0.31847	0.236522	0.578767	0.238428	Germ cells	0.456585	1.43369	7.27265e-55
DNAJC6	Erythroid	0.119763	0.0198294	0.113107	0.0221542	Metanephros	0.456264	3.80973	0
H2AFJ	Erythroid	0.409403	0.326396	0.638723	0.328327	Metanephros	0.455971	1.11374	8.65649e-48
PPM1A	Erythroid	0.226862	0.134269	0.319547	0.136423	Germ cells	0.451909	1.99199	3.05023e-99
GUK1	Erythroid	0.794288	0.56116	0.798685	0.566583	Endothelial	0.45126	0.568131	0
ASCC2	Erythroid	0.229153	0.137484	0.317176	0.139617	Germ cells	0.451168	1.96886	7.23898e-96
PSMF1	Erythroid	0.484575	0.393447	0.625395	0.395567	Germ cells	0.449412	0.927434	6.38515e-54
OPTN	Erythroid	0.291257	0.213083	0.373719	0.214902	Coel Epi	0.447829	1.53758	2.55411e-53
GTSF1	Germ cells	0.769406	0.00720523	0.0301225	0.0344082	lowQC	2.59248	3.36946	0
SYCP3	Germ cells	0.730506	0.00905773	0.0463128	0.0348062	lowQC	2.45301	3.35796	0
CPEB1	Germ cells	0.727169	0.00881073	0.132402	0.0344489	Metanephros	2.44931	3.36828	0
DAZL	Germ cells	0.714787	0.00732548	0.0309392	0.0325748	lowQC	2.44759	3.42422	0
MAP7D2	Germ cells	0.713031	0.00876848	0.0328063	0.0339036	Neural	2.41306	3.38423	0
SPINK2	Germ cells	0.658588	0.00991898	0.0399835	0.03307	Epithelial	2.24521	3.40913	0
DDX4	Germ cells	0.618458	0.00464424	0.026087	0.0265513	lowQC	2.24419	3.62868	0
DSCR8	Germ cells	0.591675	0.00246024	0.0133077	0.0234893	lowQC	2.2195	3.75121	0
RBM46	Germ cells	0.578591	0.00484249	0.0174393	0.0253196	lowQC	2.127	3.67618	0
MAEL	Germ cells	0.578328	0.00556399	0.0419162	0.0260059	Metanephros	2.11057	3.64943	0
OOEP	Germ cells	0.564893	0.00383824	0.0160461	0.0238623	lowQC	2.11013	3.73546	0
PRAME	Germ cells	0.729276	0.0364747	0.188538	0.0612008	Sertoli	2.0373	2.7936	0
CXorf67	Germ cells	0.532051	0.00346774	0.0185443	0.0223329	lowQC	2.0227	3.80169	0
ELAVL2	Germ cells	0.654022	0.0253109	0.0956522	0.0477496	Neural	1.98939	3.04178	0
TCL1A	Germ cells	0.519494	0.00347749	0.050223	0.0218941	Immune	1.98527	3.82154	0
AK5	Germ cells	0.626185	0.0211477	0.133739	0.0427415	Coel Epi	1.9741	3.15258	0
SMC1B	Germ cells	0.521338	0.00792348	0.0369445	0.0262473	lowQC	1.89777	3.64019	0
KCNV2	Germ cells	0.465841	0.00117	0.00494835	0.0177541	lowQC	1.87787	4.03114	0
HENMT1	Germ cells	0.731033	0.0529749	0.0869565	0.0771748	Neural	1.87267	2.56168	0
TDRD12	Germ cells	0.505005	0.00739698	0.0197334	0.0251566	Epithelial	1.85975	3.68263	0
DCAF4L1	Germ cells	0.476379	0.00350349	0.0117223	0.0203804	lowQC	1.85463	3.89318	0
LUZP4	Germ cells	0.463909	0.00194025	0.0118664	0.0184279	lowQC	1.8528	3.99389	0
DND1	Germ cells	0.476642	0.00526174	0.0107134	0.0220853	lowQC	1.81736	3.81284	0
ALPL	Germ cells	0.547506	0.0179887	0.179461	0.0368872	Epithelial	1.80671	3.29989	0
ZCWPW1	Germ cells	0.67176	0.0462636	0.0800703	0.0685876	Epithelial	1.80008	2.67964	0
DDX43	Germ cells	0.467071	0.00470924	0.0116347	0.0212109	Immune	1.79973	3.85324	0
HIST1H2AA	Germ cells	0.476466	0.00627574	0.026183	0.0230568	lowQC	1.79618	3.76979	0
COX8C	Germ cells	0.45065	0.00321424	0.0194571	0.0191832	lowQC	1.78174	3.95372	0
DCAF4L2	Germ cells	0.436951	0.00153725	0.006822	0.0170772	lowQC	1.7784	4.07001	0
TPTE	Germ cells	0.428872	0.00169	0.00874369	0.0169361	lowQC	1.74907	4.07831	0
ANHX	Germ cells	0.431507	0.00349374	0.022724	0.0187695	lowQC	1.71546	3.97552	0
PCSK1N	Germ cells	0.812785	0.0982343	0.576285	0.123737	Neural	1.6984	2.0896	0
TSACC	Germ cells	0.435283	0.00609049	0.0494071	0.0214084	Neural	1.67322	3.84397	0
TUBA3D	Germ cells	0.422374	0.00428349	0.0208023	0.0192052	lowQC	1.66947	3.95258	0
POU5F1	Germ cells	0.451879	0.00977923	0.06137	0.0255578	Epithelial	1.65696	3.66681	0
SPANXA2-OT1	Germ cells	0.407798	0.00283724	0.00778285	0.0172903	lowQC	1.65468	4.05761	0
BEND4	Germ cells	0.418862	0.00450124	0.0146245	0.0192898	Neural	1.65374	3.94818	0
CENPH	Germ cells	0.753688	0.0883153	0.171236	0.112062	Coel Epi	1.6496	2.1887	0
PIWIL2	Germ cells	0.465666	0.0131982	0.0193676	0.0293468	Neural	1.64313	3.52857	0
DGAT2	Germ cells	0.446084	0.010101	0.0241647	0.0256612	Coel Epi	1.6339	3.66278	0
NLRP7	Germ cells	0.395504	0.0021645	0.00946433	0.0162028	lowQC	1.63049	4.12257	0
C5orf58	Germ cells	0.399543	0.00291849	0.0142686	0.017074	lowQC	1.62622	4.0702	0
STK31	Germ cells	0.560151	0.0368549	0.207149	0.0555314	Coel Epi	1.61929	2.89081	0
KLHL35	Germ cells	0.495258	0.021385	0.059585	0.0382975	Doublets	1.61572	3.26237	0
TEX30	Germ cells	0.800053	0.108046	0.217275	0.132744	Epithelial	1.61557	2.01933	0
C5orf47	Germ cells	0.388479	0.00233349	0.013692	0.016115	lowQC	1.60364	4.128	0
KNL1	Germ cells	0.570776	0.0420809	0.0881423	0.06095	Neural	1.59686	2.7977	0
UPP1	Germ cells	0.455743	0.0147387	0.0675923	0.0304782	Endothelial	1.59088	3.49075	0
TDRKH	Germ cells	0.452757	0.014365	0.0644269	0.0300112	Neural	1.58745	3.50619	0
CCNO	Germ cells	0.392255	0.00374074	0.0261391	0.0176068	Epithelial	1.5845	4.03947	0
SYCE1	Germ cells	0.378995	0.00222299	0.00874369	0.01567	lowQC	1.57511	4.15601	0
KIT	Germ cells	0.462592	0.0176117	0.184143	0.0334931	Endothelial	1.57116	3.39642	0
HMGA1	Germ cells	0.818669	0.121953	0.680237	0.146819	Neural	1.57066	1.91856	0
PYY	Germ cells	0.373112	0.001729	0.00516582	0.0149837	Epithelial	1.56737	4.2008	0
PAGE2B	Germ cells	0.401212	0.00601574	0.0410885	0.0201203	Erythroid	1.56714	3.90603	0
DPEP3	Germ cells	0.375746	0.00243424	0.0127312	0.0157578	lowQC	1.55951	4.15042	0
DLL3	Germ cells	0.549789	0.0407679	0.421344	0.0589349	Neural	1.55663	2.83132	0
FAM162B	Germ cells	0.546628	0.0400334	0.492473	0.0581138	PV	1.55535	2.84535	0
RAB3IP	Germ cells	0.64287	0.0687211	0.376279	0.0892125	Epithelial	1.55365	2.41673	0
TCL1B	Germ cells	0.370653	0.00213525	0.0110529	0.0152877	Immune	1.54959	4.18071	0
SAP25	Germ cells	0.54092	0.0392014	0.0916829	0.0571078	Doublets	1.54855	2.86282	0
HORMAD1	Germ cells	0.364594	0.00199225	0.0118664	0.0149335	lowQC	1.53281	4.20415	0
MYBL2	Germ cells	0.539076	0.0409142	0.114625	0.0586936	Neural	1.52851	2.83543	0
SLC25A31	Germ cells	0.361521	0.00195325	0.0112419	0.0147862	lowQC	1.52347	4.21406	0
ATP11C	Germ cells	0.638743	0.0723838	0.176819	0.0925972	Coel Epi	1.51989	2.3795	0
NANOS3	Germ cells	0.408851	0.0113457	0.0640316	0.0255327	Neural	1.49958	3.6678	0
LINC00467	Germ cells	0.544608	0.0462571	0.142577	0.0640433	Epithelial	1.49669	2.7482	0
RNF17	Germ cells	0.350018	0.00207025	0.00667788	0.0144885	lowQC	1.48211	4.2344	0
MND1	Germ cells	0.605462	0.0677103	0.143321	0.0869027	Coel Epi	1.47912	2.44297	0
HERC5	Germ cells	0.8732	0.158921	0.635219	0.184414	Doublets	1.47621	1.69057	0
FOXR1	Germ cells	0.341412	0.0012285	0.00744655	0.0133696	lowQC	1.47311	4.31477	0
BRDT	Germ cells	0.341851	0.001547	0.00552486	0.0136924	lowQC	1.46685	4.29091	0
ZNF98	Germ cells	0.454338	0.0243912	0.0483521	0.039736	Epithelial	1.46547	3.2255	0
PDLIM1	Germ cells	0.609852	0.0721401	0.678226	0.091331	PV	1.45954	2.39326	0
TEX14	Germ cells	0.343256	0.00236599	0.00792698	0.0145324	lowQC	1.45245	4.23138	0
BAIAP2L1	Germ cells	0.450913	0.0250412	0.186073	0.0402406	Epithelial	1.44873	3.21288	0
L1TD1	Germ cells	0.538813	0.0514961	0.153321	0.0688885	Coel Epi	1.44147	2.67527	0
CCNB2	Germ cells	0.592115	0.0701316	0.207115	0.0887612	Neural	1.43399	2.42181	0
SYCP2	Germ cells	0.357482	0.00600599	0.0355731	0.0185501	Neural	1.42538	3.98728	0
FBXO15	Germ cells	0.383386	0.011102	0.0758343	0.0243888	Epithelial	1.42375	3.71363	0
PRIM1	Germ cells	0.569547	0.0648211	0.128063	0.0828348	Neural	1.41869	2.49091	0
NR6A1	Germ cells	0.631981	0.0866383	0.294201	0.106102	Doublets	1.41776	2.24336	0
CPVL	Germ cells	0.638391	0.0896348	0.279232	0.10922	Immune	1.41365	2.21439	0
ASRGL1	Germ cells	0.555146	0.0610934	0.65544	0.0787261	Epithelial	1.41106	2.54178	0
TAF9B	Germ cells	0.620302	0.0853773	0.205138	0.104469	Neural	1.40118	2.25887	0
TFCP2L1	Germ cells	0.348964	0.00585974	0.0698419	0.0181051	Epithelial	1.39989	4.01156	0
SPECC1	Germ cells	0.558483	0.0643954	0.212634	0.0820293	PV	1.39659	2.50068	0
OIP5	Germ cells	0.477169	0.0383304	0.0836597	0.0539926	Coel Epi	1.39281	2.91891	0
RBBP8	Germ cells	0.651914	0.0993458	0.312842	0.119067	Epithelial	1.38732	2.12807	0
C11orf65	Germ cells	0.380049	0.0131072	0.0481455	0.0262034	Epithelial	1.38409	3.64187	0
DPPA3	Germ cells	0.317088	0.00162175	0.00336296	0.0128807	lowQC	1.37997	4.35202	0
CCNB1	Germ cells	0.649807	0.100474	0.196317	0.120079	Coel Epi	1.37733	2.1196	0
SMAGP	Germ cells	0.476115	0.0399554	0.435057	0.055522	Endothelial	1.37644	2.89098	0
ZNF729	Germ cells	0.320162	0.00231724	0.00608283	0.0136611	Coel Epi	1.37452	4.2932	0
DPPA5	Germ cells	0.312961	0.001443	0.00533269	0.0125611	lowQC	1.36988	4.37715	0
HELLS	Germ cells	0.735511	0.134488	0.249509	0.155938	Epithelial	1.3668	1.85829	0
INCA1	Germ cells	0.344134	0.00692573	0.0134999	0.0189607	lowQC	1.36463	3.96539	0
CR381653.1	Germ cells	0.444766	0.0322172	0.0924817	0.0469411	Metanephros	1.36048	3.05886	0
MAGEB2	Germ cells	0.312083	0.001768	0.00783089	0.0128431	lowQC	1.3591	4.35495	0
KLRG2	Germ cells	0.307078	0.0012675	0.00485587	0.0121819	Epithelial	1.35354	4.40781	0
AL137058.1	Germ cells	0.303477	0.000838498	0.00379534	0.0116397	lowQC	1.35149	4.45334	0
SOX17	Germ cells	0.456094	0.0374952	0.516376	0.052435	Epithelial	1.34465	2.94818	0
SLC25A33	Germ cells	0.589217	0.0843698	0.196443	0.102388	Neural	1.34282	2.27899	0
VRK1	Germ cells	0.585968	0.0841423	0.171402	0.102052	Epithelial	1.33734	2.28227	0
ESX1	Germ cells	0.304531	0.0018395	0.0114821	0.0126426	lowQC	1.33101	4.37069	0
RASGRP2	Germ cells	0.37803	0.016926	0.174597	0.0298137	PV	1.32794	3.51279	0
BRCA2	Germ cells	0.455919	0.0396954	0.0753271	0.0545504	Coel Epi	1.3261	2.90863	0
TRIP13	Germ cells	0.458816	0.0407127	0.113834	0.0556348	Neural	1.3255	2.88895	0
CDX1	Germ cells	0.325255	0.00568749	0.0143676	0.0170928	Mesenchymal_LHX9_ARX	1.32349	4.0691	0
ARHGEF33	Germ cells	0.358623	0.012662	0.0170243	0.0250093	Doublets	1.32278	3.68851	0
ESCO2	Germ cells	0.421409	0.0294937	0.0587451	0.0434811	Coel Epi	1.3213	3.13543	0
AUNIP	Germ cells	0.351423	0.0112157	0.0222481	0.0233577	Coel Epi	1.32023	3.75683	0
CLSPN	Germ cells	0.491921	0.0528644	0.146988	0.0685343	Coel Epi	1.31856	2.68042	0
TRMT6	Germ cells	0.571654	0.0823743	0.15415	0.0998367	Neural	1.31722	2.30422	0
SPESP1	Germ cells	0.427028	0.0321717	0.0620677	0.0462641	Doublets	1.31242	3.07339	0
DMRTB1	Germ cells	0.296979	0.001651	0.0103291	0.0121913	lowQC	1.3088	4.40704	0
CENPF	Germ cells	0.623727	0.104218	0.215415	0.122759	Neural	1.30829	2.09753	0
KIF3A	Germ cells	0.708728	0.138417	0.311462	0.158772	Neural	1.30426	1.84029	0
REXO5	Germ cells	0.409905	0.0280117	0.0445294	0.0416415	Epithelial	1.30295	3.17866	0
NANOG	Germ cells	0.332719	0.00856373	0.0247381	0.0201328	Sertoli	1.2994	3.9054	0
TAF5	Germ cells	0.452845	0.0421459	0.0683794	0.0568038	Neural	1.29883	2.86815	0
ERI1	Germ cells	0.494117	0.0569009	0.0916417	0.0725051	Epithelial	1.29661	2.6241	0
AL392172.1	Germ cells	0.448542	0.0411482	0.107158	0.0556881	Coel Epi	1.29539	2.88799	0
NMU	Germ cells	0.438707	0.0379664	0.168236	0.0522689	Coel Epi	1.29478	2.95135	0
LIN7B	Germ cells	0.481999	0.0529554	0.172727	0.0682679	Neural	1.29384	2.68432	0
VPS13A	Germ cells	0.61477	0.103678	0.266247	0.121919	Epithelial	1.29372	2.1044	0
MTHFD2	Germ cells	0.654285	0.119915	0.349731	0.138987	PV	1.29115	1.97338	0
CCDC117	Germ cells	0.574728	0.0888093	0.149602	0.106152	Epithelial	1.28905	2.24289	0
DMRT1	Germ cells	0.466105	0.0483274	0.217404	0.0632379	Sertoli	1.28685	2.76085	0
ZNF208	Germ cells	0.374693	0.019643	0.111995	0.0323147	Epithelial	1.28603	3.43223	0
AP000547.3	Germ cells	0.361082	0.016224	0.0322752	0.0285319	Doublets	1.28427	3.55673	0
SNX10	Germ cells	0.412891	0.0314599	0.213573	0.0450732	Metanephros	1.27974	3.09947	0
M1AP	Germ cells	0.308834	0.00502124	0.0258312	0.0158643	Coel Epi	1.27971	4.14368	0
UBE2T	Germ cells	0.635318	0.115462	0.245455	0.134016	Neural	1.27686	2.0098	0
TDRD9	Germ cells	0.306024	0.00472874	0.0316148	0.015482	Epithelial	1.27553	4.16808	0
AC093459.1	Germ cells	0.282227	0.000883998	0.0024982	0.0109251	lowQC	1.27473	4.51669	0
NEIL2	Germ cells	0.540832	0.0790203	0.233289	0.0955024	Epithelial	1.2702	2.3486	0
NUP93	Germ cells	0.665174	0.129164	0.272332	0.148295	Neural	1.26952	1.90855	0
NLRP2	Germ cells	0.377064	0.0221617	0.095671	0.0348281	Epithelial	1.26593	3.35733	0
DLGAP5	Germ cells	0.429136	0.0389642	0.0943255	0.0528894	Coel Epi	1.26147	2.93955	0
AGA	Germ cells	0.525904	0.0748701	0.212729	0.0909675	Epithelial	1.26073	2.39725	0
SHD	Germ cells	0.322708	0.00891473	0.560079	0.020114	Neural	1.26061	3.90634	0
CENPU	Germ cells	0.564893	0.0905188	0.197233	0.107449	Neural	1.26013	2.23074	0
ATP1B3	Germ cells	0.747453	0.164498	0.417793	0.185304	Endothelial	1.26003	1.68576	0
C6orf136	Germ cells	0.571215	0.0935933	0.231429	0.11064	Epithelial	1.25752	2.20148	0
RPL39L	Germ cells	0.705743	0.149067	0.24598	0.168935	Coel Epi	1.25498	1.77824	0
BOLA2-SMG1P6	Germ cells	0.560678	0.0898623	0.222647	0.106666	Epithelial	1.25483	2.23806	0
EGFL7	Germ cells	0.610818	0.110724	0.944647	0.128572	Endothelial	1.25295	2.05126	0
RNF168	Germ cells	0.577977	0.0973893	0.152598	0.114541	Epithelial	1.25237	2.16682	0
LRRC69	Germ cells	0.281437	0.001716	0.00798403	0.0116992	Metanephros	1.2519	4.44823	0
RNF138	Germ cells	0.696962	0.147176	0.299618	0.166798	Epithelial	1.24824	1.79097	0
PIK3R3	Germ cells	0.50483	0.0694653	0.150347	0.0850035	Endothelial	1.24444	2.46506	0
INPP5F	Germ cells	0.559009	0.0919195	0.288142	0.10859	Neural	1.2411	2.22018	0
STAG3	Germ cells	0.376185	0.0246024	0.0698603	0.0371504	Metanephros	1.2387	3.29278	0
CHEK1	Germ cells	0.514401	0.0746036	0.151404	0.0903	Coel Epi	1.23694	2.40462	0
SMC4	Germ cells	0.734809	0.165854	0.282393	0.18616	Coel Epi	1.23532	1.68115	0
C12orf75	Germ cells	0.568932	0.0975583	0.402934	0.114382	Epithelial	1.23357	2.16821	0
CCDC112	Germ cells	0.55778	0.0929725	0.26996	0.109562	Neural	1.2334	2.21127	0
TFAP2C	Germ cells	0.282842	0.00291849	0.0351779	0.0129089	Neural	1.23031	4.34983	0
AL354920.1	Germ cells	0.321654	0.0108615	0.0356442	0.0219537	Epithelial	1.22834	3.81882	0
POLR3G	Germ cells	0.317615	0.00994173	0.0462451	0.0209226	Neural	1.22819	3.86693	0
TRMT10A	Germ cells	0.461363	0.0553734	0.142887	0.0698631	Epithelial	1.22779	2.66122	0
APOO	Germ cells	0.672287	0.142213	0.284637	0.161131	Epithelial	1.22728	1.82553	0
CEP85	Germ cells	0.413857	0.0382849	0.0640184	0.0516891	Doublets	1.22605	2.96251	0
UTP18	Germ cells	0.702055	0.156546	0.293315	0.176015	Epithelial	1.2196	1.73719	0
MYCBP	Germ cells	0.474447	0.0618799	0.138961	0.0766044	Epithelial	1.2189	2.5691	0
PDCD2L	Germ cells	0.445293	0.0506609	0.103162	0.0647453	Neural	1.2189	2.73729	0
CENPK	Germ cells	0.536617	0.0871908	0.154545	0.103231	Neural	1.21854	2.27079	0
GIP	Germ cells	0.269845	0.00138125	0.00395257	0.0109627	Neural	1.21788	4.51325	0
RACGAP1	Germ cells	0.472251	0.0613306	0.124506	0.0759964	Neural	1.21702	2.57707	0
NCAPH	Germ cells	0.407622	0.0374887	0.0940711	0.0506987	Neural	1.21547	2.98185	0
RBPMS2	Germ cells	0.492975	0.0699821	0.340188	0.0850787	PV	1.21478	2.46418	0
SALL4	Germ cells	0.292852	0.00560299	0.0399202	0.0158549	Metanephros	1.21366	4.14428	0
WDR47	Germ cells	0.444503	0.0514279	0.102016	0.0654567	PV	1.21188	2.72637	0
RFESD	Germ cells	0.371444	0.0264127	0.20679	0.0387268	Erythroid	1.20765	3.25122	0
AC107419.1	Germ cells	0.268177	0.00162175	0.00389142	0.0111351	lowQC	1.20617	4.49765	0
SKAP2	Germ cells	0.47752	0.0654484	0.281437	0.0801552	Metanephros	1.20516	2.52379	0
DPPA4	Germ cells	0.390148	0.0329387	0.200931	0.0456875	Metanephros	1.20397	3.08593	0
C9orf40	Germ cells	0.356779	0.0223177	0.0533113	0.0342546	Epithelial	1.20375	3.37393	0
PKMYT1	Germ cells	0.40569	0.0384962	0.104348	0.0516013	Neural	1.20255	2.96421	0
SGO1	Germ cells	0.420882	0.0443137	0.109741	0.0577534	Coel Epi	1.20018	2.85157	0
UTP4	Germ cells	0.581314	0.110097	0.250129	0.126914	Epithelial	1.19997	2.06424	0
ZNF296	Germ cells	0.292413	0.00630824	0.0329649	0.0165193	Immune	1.19984	4.10322	0
CENPJ	Germ cells	0.489989	0.0714998	0.128854	0.0864357	Neural	1.19967	2.44835	0
NAE1	Germ cells	0.763435	0.187248	0.360161	0.207812	Epithelial	1.19945	1.57112	0
ZBED5-AS1	Germ cells	0.442922	0.0530854	0.18829	0.0669987	Metanephros	1.19726	2.70308	0
ZNF676	Germ cells	0.303302	0.00880748	0.0330613	0.019318	Epithelial	1.19705	3.94672	0
MCM6	Germ cells	0.587636	0.113548	0.210246	0.130468	Metanephros	1.19679	2.03662	0
DYNC1LI1	Germ cells	0.69705	0.160491	0.335178	0.179641	Neural	1.19669	1.7168	0
CSTF2	Germ cells	0.502547	0.0775383	0.146193	0.0927069	Epithelial	1.19521	2.37831	0
TENT5B	Germ cells	0.298472	0.00788448	0.0335778	0.0182556	Epithelial	1.19487	4.00329	0
EPCAM	Germ cells	0.670618	0.149847	0.868065	0.168434	Epithelial	1.19451	1.78121	0
NUDT1	Germ cells	0.60994	0.123821	0.280237	0.141171	Neural	1.19413	1.95778	0
RFC3	Germ cells	0.486916	0.0713146	0.182213	0.0861474	Neural	1.19377	2.4517	0
SETD3	Germ cells	0.559449	0.102719	0.28784	0.11902	Epithelial	1.19077	2.12846	0
NRIP3	Germ cells	0.295223	0.00745873	0.0205645	0.017729	PV	1.1905	4.03255	0
SRSF12	Germ cells	0.45908	0.0605636	0.155285	0.0747867	Epithelial	1.19045	2.59312	0
ACOT7	Germ cells	0.499737	0.0773238	0.267984	0.0923997	Neural	1.19019	2.38163	0
BRCA1	Germ cells	0.414823	0.0435142	0.0879093	0.0567662	Coel Epi	1.19005	2.86882	0
DNAJC15	Germ cells	0.761328	0.189484	0.596141	0.209893	Metanephros	1.18855	1.56116	0
TYROBP	Immune	0.78185	0.0102955	0.0219897	0.0227654	Doublets	2.95736	3.78251	0
FCER1G	Immune	0.682567	0.0076579	0.0360906	0.0185658	Germ cells	2.72101	3.98643	0
LAPTM5	Immune	0.65542	0.0108179	0.197844	0.021236	Endothelial	2.52472	3.85206	0
C1QC	Immune	0.644949	0.0103942	0.018975	0.0206499	Doublets	2.50243	3.88004	0
C1QA	Immune	0.631181	0.0100884	0.020571	0.0201266	Doublets	2.46521	3.90572	0
C1QB	Immune	0.586969	0.0076802	0.0143642	0.0170427	Doublets	2.39016	4.07203	0
CSF1R	Immune	0.536164	0.00380028	0.0325782	0.0124044	Germ cells	2.3536	4.38971	0
SRGN	Immune	0.638356	0.0166633	0.251005	0.0267111	Endothelial	2.31256	3.62268	0
ITGB2	Immune	0.517355	0.00315682	0.00968213	0.0114673	Endothelial	2.31167	4.46826	0
HCST	Immune	0.535195	0.00583262	0.0155427	0.0143882	Germ cells	2.26995	4.24135	0
MS4A6A	Immune	0.501454	0.00365375	0.0126964	0.0116992	Endothelial	2.23059	4.44823	0
CD68	Immune	0.587939	0.0144175	0.050935	0.0236868	Epithelial	2.20056	3.74284	0
CD37	Immune	0.483033	0.00328105	0.0126449	0.0110348	Germ cells	2.17688	4.5067	0
FOLR2	Immune	0.502812	0.00566061	0.0311732	0.0136956	Germ cells	2.15741	4.29068	0
MS4A7	Immune	0.462284	0.00262802	0.00673878	0.010057	Doublets	2.12627	4.59949	0
CYBB	Immune	0.452201	0.00183165	0.00395257	0.00911054	Neural	2.12459	4.69832	0
HLA-DRA	Immune	0.634671	0.0261847	0.17373	0.0360191	Endothelial	2.10946	3.32371	0
SPI1	Immune	0.531123	0.0144398	0.0359281	0.0227905	Metanephros	2.00839	3.78141	0
ALOX5AP	Immune	0.424278	0.00284145	0.00895141	0.00965272	Endothelial	1.96887	4.64052	0
CD53	Immune	0.429707	0.00353589	0.0645416	0.0104237	Germ cells	1.96104	4.56367	0
MS4A4A	Immune	0.416715	0.00236681	0.00478808	0.00906353	Doublets	1.96002	4.7035	0
ARHGDIB	Immune	0.673841	0.044979	0.44209	0.0551427	Endothelial	1.95268	2.89783	0
PTPRC	Immune	0.40159	0.0013825	0.00299618	0.00785067	Epithelial	1.94657	4.84716	0
PLD4	Immune	0.417491	0.00337343	0.00755426	0.0100664	Supporting	1.91985	4.59855	0
CD14	Immune	0.512119	0.0174724	0.0799787	0.0254669	Doublets	1.87967	3.67038	0
HLA-DPA1	Immune	0.547411	0.0258024	0.138107	0.0342327	Endothelial	1.84728	3.37457	0
FYB1	Immune	0.387047	0.00251016	0.0135185	0.00872506	Endothelial	1.8352	4.74156	0
HCLS1	Immune	0.397712	0.00365694	0.0501461	0.0100257	Endothelial	1.83051	4.60261	0
RNASE6	Immune	0.374443	0.00189218	0.00904275	0.00791335	Endothelial	1.812	4.8392	0
STAB1	Immune	0.440954	0.010219	0.234015	0.0171806	Endothelial	1.79203	4.06397	0
AIF1	Immune	0.741322	0.0827334	0.709248	0.0933775	Metanephros	1.75775	2.3711	0
CORO1A	Immune	0.517937	0.0265733	0.181028	0.0345147	Neural	1.74357	3.36637	0
HLA-DRB1	Immune	0.573977	0.0393821	0.226343	0.0480223	Endothelial	1.74265	3.03609	0
CTSS	Immune	0.42389	0.0119965	0.0350243	0.0186536	Epithelial	1.68781	3.98172	0
WAS	Immune	0.36339	0.00388948	0.02056	0.00969973	Epithelial	1.68455	4.63566	0
PLEK	Immune	0.337599	0.00137613	0.00337961	0.00681018	Endothelial	1.6844	4.98934	0
HPGDS	Immune	0.338569	0.00168831	0.00372406	0.00713299	Doublets	1.67355	4.94303	0
CD163	Immune	0.335854	0.00173609	0.0097471	0.00713612	Germ cells	1.65999	4.94259	0
ADAP2	Immune	0.384332	0.00743492	0.110753	0.0135263	PV	1.65383	4.30312	0
NCF4	Immune	0.327516	0.00117544	0.0024249	0.00644977	Erythroid	1.6519	5.04371	0
GMFG	Immune	0.488268	0.0274047	0.574169	0.0348532	Endothelial	1.63893	3.35661	0
NCKAP1L	Immune	0.321311	0.00118181	0.00403934	0.00635575	Germ cells	1.62532	5.05839	0
IGSF6	Immune	0.320729	0.00119137	0.00248271	0.00635575	Doublets	1.62237	5.05839	0
F13A1	Immune	0.387435	0.0103974	0.0262161	0.0164911	Mesenchymal_GATA2_NR2F1	1.59039	4.10493	0
MRC1	Immune	0.349622	0.00550452	0.0875959	0.0110662	Endothelial	1.57465	4.50386	0
LY86	Immune	0.30987	0.00130286	0.00219218	0.00628994	Endothelial	1.57067	5.0688	0
GPR34	Immune	0.310452	0.00136657	0.00266005	0.00636202	Doublets	1.57008	5.05741	0
LST1	Immune	0.438045	0.0217569	0.0443099	0.0284849	Mesenchymal_GATA2_NR2F1	1.55873	3.55838	0
APBB1IP	Immune	0.31976	0.00323327	0.0344222	0.00834898	Germ cells	1.53025	4.78562	0
CCL3	Immune	0.306768	0.00190173	0.00645161	0.00682899	PV	1.52972	4.98658	0
HCK	Immune	0.297654	0.0012519	0.0082543	0.00604235	Germ cells	1.5207	5.10896	0
VSIG4	Immune	0.289509	0.000920605	0.00191816	0.00558479	Endothelial	1.50189	5.18771	0
LCP1	Immune	0.417297	0.0239294	0.106209	0.030287	Epithelial	1.4593	3.49704	0
LAIR1	Immune	0.310258	0.0046954	0.0111357	0.00963392	Mesenchymal_GATA2_NR2F1	1.44036	4.64247	0
HLA-DQB1	Immune	0.363583	0.0135638	0.0611984	0.0192208	Endothelial	1.43679	3.95176	0
IL10RA	Immune	0.295521	0.00310903	0.00671937	0.007835	Neural	1.43303	4.84915	0
MPEG1	Immune	0.267791	0.00052879	0.000943015	0.0048483	Erythroid	1.42709	5.32913	0
CYTH4	Immune	0.268373	0.000602057	0.00237486	0.00492978	Endothelial	1.42572	5.31246	0
LYVE1	Immune	0.375218	0.0172494	0.353398	0.0230349	Endothelial	1.41485	3.77074	0
AGR2	Immune	0.298041	0.00405831	0.0620932	0.00880968	Epithelial	1.4103	4.7319	0
HLA-DQA1	Immune	0.286019	0.00268536	0.00895141	0.00726461	Endothelial	1.40857	4.92474	0
HLA-DMB	Immune	0.306574	0.00560645	0.0579605	0.0104707	Epithelial	1.39772	4.55917	0
HLA-DMA	Immune	0.391701	0.0224449	0.108148	0.0284128	Endothelial	1.39481	3.56091	0
RGS1	Immune	0.264301	0.000974758	0.00332668	0.00523065	Metanephros	1.38843	5.25322	0
C1orf162	Immune	0.285243	0.00329061	0.0183595	0.00784754	Endothelial	1.38273	4.84756	0
FCGR2A	Immune	0.339151	0.012417	0.0278226	0.0176977	PV	1.36824	4.03432	0
C3AR1	Immune	0.252085	0.000560645	0.00127877	0.00462578	Endothelial	1.35523	5.37611	0
LCP2	Immune	0.2707	0.00250061	0.0299598	0.00683525	Endothelial	1.34962	4.98566	0
HLA-DPB1	Immune	0.478379	0.0530447	0.157015	0.059919	Endothelial	1.34652	2.81476	0
GPSM3	Immune	0.398681	0.0282871	0.167194	0.0342734	Germ cells	1.34491	3.37338	0
CD36	Immune	0.428738	0.0371077	0.256942	0.0434372	Endothelial	1.34471	3.13644	0
LAT2	Immune	0.25286	0.000895121	0.00237154	0.00496739	Neural	1.34139	5.30486	0
CD300A	Immune	0.259065	0.00165964	0.0094018	0.00581984	Epithelial	1.33328	5.14648	0
CD86	Immune	0.246073	0.000554274	0.00158103	0.00452236	Neural	1.32848	5.39872	0
CCL4	Immune	0.254024	0.00215976	0.00461075	0.00623039	Doublets	1.29001	5.07832	0
LY96	Immune	0.303083	0.010047	0.0729814	0.0147831	Endothelial	1.27727	4.21427	0
FERMT3	Immune	0.277487	0.00573387	0.0191297	0.010126	Erythroid	1.2744	4.59265	0
HLA-DRB5	Immune	0.339151	0.0183675	0.0790099	0.023552	Endothelial	1.27132	3.74854	0
VAMP8	Immune	0.572426	0.10111	0.691949	0.108728	Metanephros	1.27016	2.21891	0
TYMP	Immune	0.346325	0.0208299	0.0860626	0.0260906	Epithelial	1.26277	3.64618	0
CLEC7A	Immune	0.231724	0.000573387	0.00395153	0.00430925	Germ cells	1.2622	5.44699	0
GPR183	Immune	0.255963	0.00328105	0.0172987	0.0073649	Metanephros	1.25704	4.91103	0
PARVG	Immune	0.238705	0.00149718	0.0126964	0.00533093	Endothelial	1.24943	5.23423	0
CSF2RA	Immune	0.23502	0.00125827	0.00491746	0.00503634	Germ cells	1.24351	5.29108	0
PTAFR	Immune	0.239092	0.00180617	0.0179028	0.0056412	Endothelial	1.23794	5.17766	0
SPP1	Immune	0.396548	0.0388279	0.432042	0.0446094	Endothelial	1.23319	3.10981	0
TBXAS1	Immune	0.290673	0.00984952	0.343313	0.0143882	Metanephros	1.23284	4.24135	0
GLIPR1	Immune	0.367074	0.0317593	0.138978	0.0371786	PV	1.20841	3.29202	0
MNDA	Immune	0.214854	0.000729476	0.0016166	0.00419016	Erythroid	1.17633	5.47502	0
GIMAP4	Immune	0.332558	0.0241428	0.627329	0.0291274	Endothelial	1.17595	3.53608	0
RGS10	Immune	0.567772	0.119398	0.548788	0.126645	Coel Epi	1.17323	2.06637	0
SLCO2B1	Immune	0.274578	0.00995145	0.175831	0.0142284	Endothelial	1.16765	4.25252	0
DOCK8	Immune	0.285243	0.0125604	0.155251	0.0169675	Germ cells	1.16278	4.07646	0
RETN	Immune	0.213496	0.00103847	0.00913242	0.00447222	Germ cells	1.15499	5.40987	0
NCF1	Immune	0.267791	0.00950867	0.016884	0.013683	Supporting	1.14925	4.2916	0
RCSD1	Immune	0.328873	0.0259107	0.301882	0.0308072	PV	1.14448	3.48001	0
CASP1	Immune	0.246073	0.00573069	0.0443003	0.00961511	Endothelial	1.14287	4.64442	0
CD4	Immune	0.301532	0.0184121	0.0649194	0.0229879	PV	1.13762	3.77279	0
HMOX1	Immune	0.393058	0.0498019	0.106804	0.0553496	Supporting	1.13754	2.89409	0
AOAH	Immune	0.217956	0.001975	0.0172989	0.0054657	Germ cells	1.13539	5.20926	0
CD74	Immune	0.875703	0.266558	0.648311	0.276403	Epithelial	1.12606	1.28589	0
DOK2	Immune	0.2261	0.00343395	0.0679663	0.0070327	Germ cells	1.12082	4.95719	0
LSP1	Immune	0.404305	0.0575394	0.097944	0.0631438	Epithelial	1.11683	2.76234	0
A2M	Immune	0.453558	0.0802105	0.84673	0.0862446	Endothelial	1.11148	2.45057	0
FCGR1A	Immune	0.202249	0.000907863	0.00140499	0.00416195	Germ cells	1.10868	5.48177	0
UCP2	Immune	0.500873	0.10335	0.554499	0.109775	Epithelial	1.10659	2.20933	0
NCF2	Immune	0.203607	0.00109262	0.0102151	0.00436566	PV	1.1064	5.43399	0
HAVCR2	Immune	0.202831	0.00117226	0.00413266	0.00443148	Epithelial	1.09915	5.41902	0
MYO1F	Immune	0.252278	0.00904678	0.123288	0.0129779	Germ cells	1.09603	4.34451	0
CYBA	Immune	0.739771	0.221942	0.811344	0.230311	Epithelial	1.08622	1.46832	0
SAMSN1	Immune	0.201862	0.00143028	0.00721593	0.00466966	Endothelial	1.08332	5.36667	0
IKZF1	Immune	0.212527	0.0029848	0.0362387	0.00637142	Erythroid	1.07452	5.05593	0
SAMHD1	Immune	0.430289	0.0776717	0.4366	0.0833707	Germ cells	1.06904	2.48446	0
TREM2	Immune	0.189063	0.000799557	0.00158103	0.00384228	Neural	1.05151	5.56169	0
INPP5D	Immune	0.244328	0.0103337	0.189167	0.0141155	Endothelial	1.04095	4.26048	0
FGD2	Immune	0.18693	0.000809113	0.008162	0.00381721	Epithelial	1.04087	5.56823	0
FPR1	Immune	0.181889	0.00045871	0.00272216	0.00339099	Germ cells	1.03433	5.68663	0
SYK	Immune	0.314718	0.0331386	0.359025	0.0376895	Epithelial	1.03176	3.27837	0
LYZ	Immune	0.197789	0.00231903	0.0111521	0.00547823	Germ cells	1.02988	5.20697	0
CD33	Immune	0.18693	0.00126464	0.0067615	0.00426537	Germ cells	1.02012	5.45723	0
ARRB2	Immune	0.461509	0.104274	0.247431	0.110047	Neural	1.01848	2.20685	0
TNFAIP8L2	Immune	0.180143	0.000672137	0.00360028	0.00357276	Germ cells	1.015	5.63442	0
SELPLG	Immune	0.188288	0.00158319	0.0146841	0.00460071	Erythroid	1.01328	5.38154	0
IRF8	Immune	0.217374	0.00617665	0.0194235	0.00959004	Epithelial	1.01015	4.64703	0
ARPC1B	Immune	0.452977	0.102477	0.369474	0.108142	Endothelial	1.00756	2.22431	0
SASH3	Immune	0.175684	0.000410927	0.00365364	0.00324369	Endothelial	1.00685	5.73104	0
DOCK2	Immune	0.203025	0.00380347	0.0152792	0.0070233	Germ cells	1.0067	4.95852	0
LILRB2	Immune	0.174714	0.00035996	0.00193186	0.00317788	Germ cells	1.00487	5.75154	0
MILR1	Immune	0.180725	0.000955645	0.00347095	0.00386109	Endothelial	1.00426	5.55681	0
LYN	Immune	0.275354	0.0223143	0.230636	0.026404	Endothelial	1.0007	3.63424	0
CX3CR1	Immune	0.191584	0.00247194	0.00586587	0.00552838	Supporting	0.995828	5.19786	0
CXCL16	Immune	0.281365	0.0250602	0.233599	0.0292026	Epithelial	0.994203	3.5335	0
CCR1	Immune	0.18441	0.00188262	0.0105302	0.00483263	Sertoli	0.983339	5.33236	0
NAIP	Immune	0.32422	0.0454346	0.123463	0.0499403	Epithelial	0.971662	2.99693	0
GNA15	Immune	0.170254	0.000611613	0.00237092	0.00335338	Germ cells	0.970071	5.69779	0
CALHM6	Immune	0.333721	0.0505409	0.191781	0.0551177	Germ cells	0.967219	2.89828	0
CD84	Immune	0.175296	0.0012073	0.00372406	0.00402092	Doublets	0.966974	5.51624	0
ARHGAP9	Immune	0.187706	0.00287968	0.03732	0.00586685	Germ cells	0.964516	5.13844	0
MSR1	Immune	0.172969	0.00109899	0.00939586	0.00387676	Germ cells	0.960453	5.55276	0
ARHGAP30	Immune	0.167151	0.00055746	0.00216965	0.00324996	Epithelial	0.95763	5.72911	0
SLA	Immune	0.195656	0.00447561	0.0197581	0.00756548	PV	0.955617	4.88416	0
FCGR3A	Immune	0.165988	0.000544718	0.000913409	0.00321862	Endothelial	0.952572	5.7388	0
ARHGAP4	Immune	0.353112	0.0632796	0.111103	0.0679639	Supporting	0.949441	2.68878	0
DAB2	Immune	0.490207	0.140595	0.460413	0.146245	Metanephros	0.94241	1.92247	0
RNASET2	Immune	0.572232	0.187816	0.787581	0.194029	Epithelial	0.938316	1.63975	0
HLA-E	Immune	0.663952	0.236449	0.870661	0.243358	Endothelial	0.93831	1.41322	0
HLA-B	Immune	0.796005	0.300668	0.76297	0.308674	Endothelial	0.93568	1.17547	0
CD28	Immune	0.161916	0.000484194	0.00158103	0.00309326	Neural	0.935636	5.77853	0
C5AR1	Immune	0.180337	0.00276819	0.0271722	0.00563807	Epithelial	0.933826	5.17821	0
VSIR	Immune	0.319953	0.0498719	0.228444	0.054237	Endothelial	0.93247	2.91439	0
BIN2	Immune	0.192554	0.00487061	0.111609	0.00790395	Germ cells	0.932036	4.84039	0
CTSZ	Immune	0.461703	0.129197	0.419827	0.134571	Metanephros	0.92602	2.00566	0
TNFRSF1B	Immune	0.34012	0.0613875	0.227028	0.0658924	Supporting	0.925036	2.71973	0
ITGAM	Immune	0.162304	0.000745403	0.00614682	0.00335651	Germ cells	0.92462	5.69685	0
PTPN6	Immune	0.30638	0.0456289	0.155388	0.0498431	Epithelial	0.918794	2.99887	0
ARHGAP45	Immune	0.198565	0.00675641	0.103618	0.00985643	Germ cells	0.917297	4.61963	0
TGFB1	Immune	0.414776	0.106029	0.456796	0.111019	Endothelial	0.911701	2.19806	0
NPL	Immune	0.229203	0.0153445	0.262428	0.0188009	Erythroid	0.910819	3.97385	0
RGS19	Immune	0.286989	0.0379296	0.180946	0.0419549	Endothelial	0.910087	3.17116	0
OGFRL1	Immune	0.267985	0.0296823	0.0795537	0.0335338	Epithelial	0.909864	3.3952	0
LILRB5	Immune	0.164437	0.00153859	0.0067615	0.00417135	Germ cells	0.901033	5.47951	0
JAML	Immune	0.152414	0.000423669	0.00412715	0.00288015	Germ cells	0.89161	5.84991	0
GPR65	Immune	0.152802	0.000621169	0.00416667	0.00308072	PV	0.883592	5.78259	0
PTPRE	Immune	0.267016	0.0330908	0.220771	0.0368715	Endothelial	0.881236	3.30032	0
PPP1R18	Immune	0.373279	0.0907863	0.325082	0.095352	Endothelial	0.877273	2.35018	0
RENBP	Immune	0.198953	0.00915827	0.0796493	0.0122257	Endothelial	0.876231	4.40421	0
PYCARD	Immune	0.468102	0.14967	0.373302	0.154816	Coel Epi	0.87325	1.86551	0
TNFSF13B	Immune	0.173163	0.00380028	0.0124156	0.00653752	Coel Epi	0.871042	5.0302	0
BTK	Immune	0.15765	0.00158956	0.0133474	0.00411181	Germ cells	0.866111	5.49389	0
S100A4	Immune	0.344386	0.0780221	0.421823	0.0823271	Metanephros	0.859952	2.49706	0
CD48	Immune	0.159977	0.00266944	0.00729446	0.00521184	Mesenchymal_GATA2_NR2F1	0.840969	5.25682	0
WIPF1	Immune	0.273221	0.0428607	0.136281	0.0465838	Endothelial	0.837833	3.0665	0
FLI1	Immune	0.243746	0.0289847	0.515437	0.0324557	Endothelial	0.835533	3.42788	0
LGMN	Immune	0.465969	0.161743	0.419155	0.16666	Epithelial	0.834923	1.7918	0
TAGAP	Immune	0.160946	0.00327786	0.0141129	0.00582611	PV	0.828134	5.14541	0
CCL4L2	Immune	0.144464	0.000942903	0.00164039	0.00326249	Sertoli	0.827093	5.72526	0
CYTIP	Immune	0.161722	0.00349129	0.00724095	0.00604862	Supporting	0.826063	5.10792	0
LRRC25	Immune	0.145433	0.00114677	0.00834211	0.00347874	Germ cells	0.823311	5.66108	0
POU2F2	Immune	0.189839	0.0103719	0.183004	0.0132725	Neural	0.820496	4.32206	0
RUNX1	Immune	0.279814	0.05013	0.136708	0.0538421	Supporting	0.817532	2.9217	0
MEF2C	Immune	0.486329	0.18228	0.713844	0.187194	PV	0.814898	1.67561	0
CXCR4	Immune	0.26624	0.0444885	0.24086	0.0480724	PV	0.808051	3.03505	0
P2RY13	Immune	0.133411	0.000235726	0.000709346	0.00238811	Doublets	0.805435	6.03725	0
DEF6	Immune	0.191584	0.0120571	0.0448718	0.0149586	Germ cells	0.805127	4.20247	0
2021-03-01	Immune	0.202831	0.0158637	0.0510753	0.0188855	PV	0.80511	3.96936	0
UNC93B1	Immune	0.202831	0.0158924	0.151772	0.0189137	Epithelial	0.804807	3.96787	0
CCL3L1	Immune	0.137871	0.000713549	0.0082543	0.00293029	Germ cells	0.804153	5.83265	0
NRROS	Immune	0.19585	0.0137549	0.234472	0.016698	Endothelial	0.801511	4.09247	0
PIK3AP1	Immune	0.152608	0.00282871	0.0180014	0.00524945	Germ cells	0.801136	5.24963	0
GLRX	Immune	0.282141	0.0551758	0.287759	0.058844	Germ cells	0.799267	2.83287	0
RASSF4	Immune	0.260423	0.0431092	0.2083	0.0466214	Neural	0.798377	3.0657	0
NEAT1	Immune	0.520652	0.214982	0.58483	0.219922	Metanephros	0.788517	1.51448	0
FGL2	Immune	0.233663	0.0311158	0.0789845	0.0343894	Mesenchymal_GATA2_NR2F1	0.787446	3.37001	0
LIMD2	Immune	0.389568	0.129178	0.49249	0.133386	Neural	0.784786	2.01451	0
CSF3R	Immune	0.159007	0.0047846	0.0227439	0.00727715	Endothelial	0.782795	4.92302	0
SMAP2	Immune	0.266822	0.0498942	0.144269	0.0534002	Neural	0.781772	2.92994	0
FMNL1	Immune	0.241419	0.0360661	0.204733	0.039385	Coel Epi	0.78084	3.23437	0
TFEC	Immune	0.145627	0.00242097	0.0614733	0.00473547	Epithelial	0.779495	5.35267	0
CREG1	Immune	0.444832	0.170987	0.570307	0.175413	Epithelial	0.77428	1.74061	0
EFHD2	Immune	0.377545	0.124763	0.349175	0.128848	Doublets	0.773635	2.04912	0
UBE2C	lowQC	0.13447	0.112614	0.342641	0.11404	Germ cells	0.291963	2.17121	3.3771e-18
CDC20	lowQC	0.073841	0.0661054	0.353618	0.06661	Germ cells	0.200028	2.7089	0.00392841
HOXC10	lowQC	0.048811	0.0244111	0.194943	0.0260028	Metanephros	0.178138	3.64955	1.97469e-79
HOXB9	lowQC	0.0389623	0.0136154	0.43083	0.0152689	Neural	0.162938	4.18194	5.88533e-129
HOXA10	lowQC	0.048907	0.0390256	0.165003	0.0396702	Metanephros	0.157831	3.22716	2.55752e-09
SYCP3	lowQC	0.0463128	0.0340032	0.730506	0.0348062	Germ cells	0.155516	3.35796	1.38365e-16
SMC1B	lowQC	0.0369445	0.0255007	0.521338	0.0262473	Germ cells	0.134485	3.64019	1.7431e-18
HBE1	lowQC	0.0321403	0.0171491	0.240873	0.0181271	Erythroid	0.128894	4.01035	4.77346e-43
SIX2	lowQC	0.022724	0.00231337	0.0311732	0.00364484	Germ cells	0.127583	5.61444	2.43413e-239
HOXB-AS3	lowQC	0.0285371	0.0122475	0.164893	0.0133101	Epithelial	0.123258	4.31923	1.25127e-64
NKAIN3	lowQC	0.0310834	0.018859	0.239526	0.0196565	Neural	0.122137	3.92935	2.81566e-27
BMPER	lowQC	0.0256065	0.0145105	0.0397703	0.0152344	Mesenchymal_GATA2_NR2F1	0.107143	4.1842	2.98594e-28
SIX1	lowQC	0.0233485	0.011188	0.193449	0.0119813	Germ cells	0.103304	4.42441	4.63286e-41
PAGE2B	lowQC	0.0257026	0.0197307	0.401212	0.0201203	Germ cells	0.100395	3.90603	3.0648e-06
PAX2	lowQC	0.0247418	0.0175883	0.442918	0.018055	Epithelial	0.0993217	4.01433	3.64474e-10
HLA-DQB1	lowQC	0.0243094	0.0188657	0.363583	0.0192208	Immune	0.0960649	3.95176	2.54357e-05
EYA1	lowQC	0.0209945	0.00972286	0.0920949	0.0104582	Neural	0.0957426	4.56037	6.93521e-40
HOXA11	lowQC	0.0190247	0.00688982	0.0212884	0.00768144	Mesenchymal_GATA2_NR2F1	0.0926305	4.86895	2.16002e-58
ANHX	lowQC	0.022724	0.0184936	0.431507	0.0187695	Germ cells	0.0903397	3.97552	0.00484298
HOXA11-AS	lowQC	0.0171031	0.00563591	0.0178481	0.00638396	Mesenchymal_GATA2_NR2F1	0.0864383	5.05397	1.02987e-60
HOXD11	lowQC	0.017055	0.0112852	0.0288538	0.0116616	Neural	0.0759196	4.45145	6.41359e-10
SHISA3	lowQC	0.0148451	0.00578343	0.0213439	0.00637456	Neural	0.0750483	5.05544	8.66839e-40
ELAVL4	lowQC	0.0164305	0.011473	0.444269	0.0117964	Neural	0.0729506	4.43996	3.55655e-07
PAGE2	lowQC	0.0156137	0.0117647	0.259396	0.0120158	Germ cells	0.0690367	4.42154	0.000526959
IL19	lowQC	0.00956041	0.000311802	0.00474308	0.000915128	Neural	0.0668889	6.99645	1.62068e-157
AC103702.2	lowQC	0.0126832	0.00537775	0.188538	0.00585431	Neural	0.0651988	5.14058	1.12553e-28
CHRNA1	lowQC	0.00864761	0.000482791	0.00532269	0.00101542	Metanephros	0.0596033	6.89246	1.95673e-119
HOXC11	lowQC	0.00956041	0.00190769	0.0225296	0.00240691	Neural	0.0576437	6.02941	1.02987e-60
FGF8	lowQC	0.00773481	0.000653779	0.00711462	0.0011157	Neural	0.0525833	6.79827	1.21497e-88
AC020571.1	lowQC	0.00802306	0.00226308	0.00474308	0.00263883	Neural	0.0476363	5.93742	1.30612e-34
CSH2	lowQC	0.00648571	0.0004325	0.00201967	0.000827376	Germ cells	0.0460307	7.09725	7.18114e-83
CSH1	lowQC	0.00610137	0.0004325	0.00105374	0.000802304	Germ cells	0.0434907	7.12802	7.26021e-76
SLC15A1	lowQC	0.00538074	0.000479438	0.011976	0.00079917	Metanephros	0.0383751	7.13194	9.68925e-60
BIRC7	lowQC	0.00667788	0.00402325	0.0259481	0.00419643	Metanephros	0.0365515	5.47352	3.1272e-05
AC093901.1	lowQC	0.0062455	0.00299397	0.0371542	0.00320608	Neural	0.035866	5.74271	3.25302e-10
CPB1	lowQC	0.0062455	0.00337953	0.016076	0.00356649	Endothelial	0.0352007	5.63617	3.21029e-07
AC120042.3	lowQC	0.00629354	0.00384891	0.0849802	0.00400839	Neural	0.0347363	5.51937	0.000141227
LINC01807	lowQC	0.00480423	0.000918643	0.00368809	0.00117212	Germ cells	0.0324235	6.74894	3.76439e-31
UNCX	lowQC	0.00403555	0.000569961	0.0109515	0.000796036	Epithelial	0.0287972	7.13587	2.28908e-33
SULT2A1	lowQC	0.00422772	0.00103599	0.00434783	0.0012442	Neural	0.0282803	6.68926	4.21457e-21
HOXB1	lowQC	0.00441989	0.00198816	0.0444327	0.00214679	Germ cells	0.0271548	6.14378	3.44493e-08
ASB4	lowQC	0.00393947	0.00104269	0.00598802	0.00123166	Metanephros	0.026392	6.69939	6.70221e-18
CGA	lowQC	0.00384338	0.000968934	0.0110672	0.00115645	Neural	0.0259905	6.7624	1.74491e-18
CACNG6	lowQC	0.00384338	0.00114327	0.0154549	0.00131941	Germ cells	0.0254838	6.63057	5.59407e-15
ADGB	lowQC	0.00398751	0.00159924	0.0209732	0.00175504	Epithelial	0.0253018	6.34526	2.10049e-09
AC011298.1	lowQC	0.00326687	0.000623604	0.0160141	0.000796036	Epithelial	0.023312	7.13587	6.90225e-21
SPINK1	lowQC	0.00326687	0.00127068	0.0226263	0.0014009	Epithelial	0.0214655	6.57064	4.90004e-08
VSTM2B	lowQC	0.00288254	0.000576666	0.00869336	0.000727088	Germ cells	0.0208305	7.22646	1.5976e-17
MC2R	lowQC	0.00245016	0.000546492	0.00316206	0.000670676	Neural	0.0179038	7.30722	3.50071e-13
AL390115.1	lowQC	0.00211386	9.38759e-05	0.00316206	0.000225648	Neural	0.0177491	8.39653	1.061e-30
CYP11B1	lowQC	0.00235407	0.000583372	0.00237154	0.000698882	Neural	0.0171048	7.26603	3.56017e-11
LINC01571	lowQC	0.00240211	0.000774476	0.0113648	0.000880654	Epithelial	0.0168985	7.03485	5.79647e-08
TFF2	lowQC	0.0021619	0.000315155	0.00433929	0.000435626	Epithelial	0.0167304	7.73873	5.4679e-17
FOXI2	lowQC	0.00206582	0.000194457	0.00356229	0.000316534	Endothelial	0.0166465	8.05808	1.67979e-21
LINC02086	lowQC	0.00211386	0.00075436	0.0355731	0.000843046	Neural	0.0149629	7.07849	9.29054e-06
SLC32A1	lowQC	0.0021619	0.00102928	0.0192947	0.00110317	Metanephros	0.0147216	6.80957	0.00519463
SPINK4	lowQC	0.00192169	0.000771124	0.00351247	0.00084618	Germ cells	0.0135955	7.07478	0.000493251
CLRN1	lowQC	0.00177756	0.0004325	0.0027668	0.000520244	Neural	0.0134405	7.56121	2.20968e-08
CHRNA9	lowQC	0.00134518	4.35853e-05	0.000665336	0.000128494	Metanephros	0.0120523	8.95963	4.9734e-21
PLA2G3	lowQC	0.00144127	0.000291686	0.00158103	0.000366678	Neural	0.0114019	7.91103	3.62762e-08
GJA8	lowQC	0.00129714	7.37597e-05	0.000965929	0.000153566	Germ cells	0.0113907	8.78138	9.23668e-17
CHRNG	lowQC	0.00129714	7.71124e-05	0.00118577	0.0001567	Neural	0.0113645	8.76118	1.74174e-16
MYF5	lowQC	0.00115301	0.000113992	0.00266134	0.000181772	Metanephros	0.00993064	8.61276	3.43682e-11
HOXB-AS4	lowQC	0.00110497	0.000110639	0.00592885	0.000175504	Neural	0.00955563	8.64785	1.32905e-10
PAX7	lowQC	0.00105693	0.000140814	0.00210748	0.000200576	Germ cells	0.00899904	8.51432	2.51146e-08
AL157414.1	lowQC	0.000816719	3.35271e-06	1.29334e-05	5.6412e-05	Mesenchymal_GATA2_NR2F1	0.00798982	9.78283	9.23668e-17
AC003092.1	lowQC	0.000864761	0.000194457	0.0106454	0.000238184	Metanephros	0.00721424	8.34247	0.000582258
PSG4	lowQC	0.00062455	8.71705e-05	0.00332668	0.000122226	Metanephros	0.00562697	9.00964	0.000266393
MUC5AC	lowQC	0.000576507	6.37015e-05	0.00122936	9.7154e-05	Germ cells	0.00532647	9.23921	0.000113825
AC011474.2	lowQC	0.000480423	1.00581e-05	0.000395257	4.0742e-05	Neural	0.00485623	10.1083	1.70223e-07
PSG5	lowQC	0.000480423	3.35271e-05	0.000249979	6.268e-05	Coel Epi	0.00464928	9.67747	6.26788e-05
SMTNL1	lowQC	0.000480423	5.69961e-05	0.000878117	8.4618e-05	Germ cells	0.0045051	9.37736	0.00159363
PSG9	lowQC	0.00043238	2.01163e-05	0.000249979	4.701e-05	Coel Epi	0.00430874	9.96515	3.38815e-05
LGALS14	lowQC	0.00043238	4.02325e-05	0.000206633	6.5814e-05	Epithelial	0.00416325	9.62868	0.00117807
CSHL1	lowQC	0.000384338	2.68217e-05	0.000166653	5.0144e-05	Coel Epi	0.00380518	9.90061	0.00102644
HSD3B1	lowQC	0.000384338	2.68217e-05	0.000103316	5.0144e-05	Epithelial	0.00380518	9.90061	0.00102644
PSG3	lowQC	0.000384338	3.35271e-05	0.000249979	5.6412e-05	Coel Epi	0.00375991	9.78283	0.00297564
PSG6	lowQC	0.000336296	1.34108e-05	0.000103316	3.4474e-05	Epithelial	0.00345554	10.2753	0.000536264
PSG1	lowQC	0.000336296	2.68217e-05	0.000166653	4.701e-05	Coel Epi	0.00335124	9.96515	0.00722995
CD248	Mesenchymal_GATA2_NR2F1	0.699362	0.161043	0.677688	0.291487	PV	0.862146	1.23276	0
OGN	Mesenchymal_GATA2_NR2F1	0.5897	0.120887	0.370101	0.234489	Doublets	0.855269	1.45035	0
SULT1E1	Mesenchymal_GATA2_NR2F1	0.484072	0.0707886	0.472312	0.170935	PV	0.855101	1.76647	0
PLAT	Mesenchymal_GATA2_NR2F1	0.600305	0.126389	0.539919	0.241227	PV	0.853644	1.42202	0
RSPO3	Mesenchymal_GATA2_NR2F1	0.425782	0.0445355	0.213868	0.136918	Doublets	0.846612	1.98837	0
NR2F1	Mesenchymal_GATA2_NR2F1	0.510185	0.100673	0.532934	0.199905	Metanephros	0.821353	1.60991	0
PCOLCE	Mesenchymal_GATA2_NR2F1	0.766707	0.207502	0.591034	0.343007	Coel Epi	0.82038	1.07	0
EDNRA	Mesenchymal_GATA2_NR2F1	0.568269	0.135005	0.740726	0.239992	PV	0.811004	1.42715	0
GATA2	Mesenchymal_GATA2_NR2F1	0.397406	0.0510461	0.487352	0.134975	Neural	0.79587	2.00266	0
ITM2A	Mesenchymal_GATA2_NR2F1	0.569006	0.143985	0.65802	0.246975	Endothelial	0.795737	1.39847	0
PDGFRA	Mesenchymal_GATA2_NR2F1	0.702919	0.200747	0.591014	0.322432	Mesenchymal_LHX9_ARX	0.795608	1.13186	0
MMP23B	Mesenchymal_GATA2_NR2F1	0.503343	0.116309	0.479042	0.210094	Metanephros	0.785316	1.5602	0
ELN	Mesenchymal_GATA2_NR2F1	0.542583	0.139182	0.466532	0.236934	PV	0.781307	1.43998	0
GPC3	Mesenchymal_GATA2_NR2F1	0.836366	0.25408	0.863606	0.395179	Metanephros	0.776497	0.928417	0
FAP	Mesenchymal_GATA2_NR2F1	0.391896	0.0569817	0.220161	0.138137	PV	0.775761	1.97951	0
LUM	Mesenchymal_GATA2_NR2F1	0.416224	0.0722694	0.271325	0.155616	Doublets	0.774328	1.86037	0
OLFML3	Mesenchymal_GATA2_NR2F1	0.796661	0.246734	0.622273	0.379991	Doublets	0.770854	0.967607	0
NKAIN4	Mesenchymal_GATA2_NR2F1	0.54808	0.14846	0.40947	0.245295	Doublets	0.770213	1.40529	0
POSTN	Mesenchymal_GATA2_NR2F1	0.718556	0.222636	0.566953	0.342806	Mesenchymal_LHX9_ARX	0.769278	1.07059	0
EMILIN1	Mesenchymal_GATA2_NR2F1	0.664869	0.203278	0.564856	0.31513	Mesenchymal_LHX9_ARX	0.767771	1.15477	0
LDB2	Mesenchymal_GATA2_NR2F1	0.50831	0.130467	0.704238	0.222025	Endothelial	0.764988	1.50496	0
FBLN1	Mesenchymal_GATA2_NR2F1	0.760861	0.24216	0.498858	0.36785	Germ cells	0.760921	1.00008	0
PLAC9	Mesenchymal_GATA2_NR2F1	0.589066	0.178858	0.697043	0.278258	PV	0.753536	1.2792	0
COL5A1	Mesenchymal_GATA2_NR2F1	0.617002	0.194154	0.495595	0.296617	Mesenchymal_LHX9_ARX	0.74985	1.21531	0
SRPX	Mesenchymal_GATA2_NR2F1	0.543333	0.164091	0.423118	0.255988	PV	0.740359	1.36262	0
OSR2	Mesenchymal_GATA2_NR2F1	0.414491	0.0899728	0.255364	0.168609	Doublets	0.737864	1.78017	0
COL5A2	Mesenchymal_GATA2_NR2F1	0.6423	0.215489	0.643683	0.318913	PV	0.734045	1.14284	0
COL14A1	Mesenchymal_GATA2_NR2F1	0.628358	0.210844	0.493817	0.312015	PV	0.731851	1.1647	0
HSPB6	Mesenchymal_GATA2_NR2F1	0.729484	0.251206	0.705976	0.367101	Doublets	0.731029	1.00212	0
ISLR	Mesenchymal_GATA2_NR2F1	0.826395	0.287655	0.693917	0.418201	Doublets	0.720445	0.871793	0
PAMR1	Mesenchymal_GATA2_NR2F1	0.301465	0.0245448	0.153495	0.0916476	PV	0.720443	2.3898	0
TCF21	Mesenchymal_GATA2_NR2F1	0.60328	0.21074	0.884897	0.30586	Metanephros	0.714663	1.18463	0
GSTM5	Mesenchymal_GATA2_NR2F1	0.42066	0.109244	0.282124	0.184705	PV	0.710492	1.68899	0
MFAP4	Mesenchymal_GATA2_NR2F1	0.802804	0.288598	0.655258	0.413199	Doublets	0.709539	0.883826	0
FXYD1	Mesenchymal_GATA2_NR2F1	0.517273	0.171421	0.510978	0.255227	Metanephros	0.706389	1.3656	0
CTSK	Mesenchymal_GATA2_NR2F1	0.37569	0.0813651	0.235753	0.152685	PV	0.706063	1.87938	0
IGF1	Mesenchymal_GATA2_NR2F1	0.380786	0.0925952	0.232049	0.162429	Epithelial	0.692084	1.81751	0
SPARCL1	Mesenchymal_GATA2_NR2F1	0.735046	0.281124	0.814651	0.391117	PV	0.690023	0.938749	0
GLT8D2	Mesenchymal_GATA2_NR2F1	0.37926	0.0932074	0.218534	0.162523	Mesenchymal_LHX9_ARX	0.689091	1.81694	0
PRRX1	Mesenchymal_GATA2_NR2F1	0.414633	0.118211	0.443145	0.19004	PV	0.688508	1.66052	0
FLRT2	Mesenchymal_GATA2_NR2F1	0.429946	0.130409	0.264061	0.202992	Coel Epi	0.685586	1.59459	0
COL6A3	Mesenchymal_GATA2_NR2F1	0.673858	0.26354	0.748253	0.362967	PV	0.682916	1.01344	0
FHL1	Mesenchymal_GATA2_NR2F1	0.428679	0.132573	0.430547	0.204324	Coel Epi	0.680762	1.58805	0
CRABP2	Mesenchymal_GATA2_NR2F1	0.5539	0.212188	0.636016	0.294991	Epithelial	0.676207	1.22081	0
MEIS1	Mesenchymal_GATA2_NR2F1	0.432416	0.138359	0.486207	0.209614	Epithelial	0.675644	1.56249	0
TGFBI	Mesenchymal_GATA2_NR2F1	0.380243	0.10177	0.429032	0.169249	PV	0.675458	1.77639	0
MXRA8	Mesenchymal_GATA2_NR2F1	0.503188	0.186237	0.826347	0.26304	Metanephros	0.671983	1.33545	0
FN1	Mesenchymal_GATA2_NR2F1	0.565294	0.223993	0.669437	0.306696	Endothelial	0.66812	1.1819	0
DES	Mesenchymal_GATA2_NR2F1	0.517557	0.197488	0.407164	0.275046	Doublets	0.668071	1.29082	0
FBLN5	Mesenchymal_GATA2_NR2F1	0.353303	0.0862543	0.209966	0.150965	Doublets	0.667992	1.89071	0
LRRC17	Mesenchymal_GATA2_NR2F1	0.546192	0.214413	0.372584	0.294809	Doublets	0.667133	1.22143	0
PLS3	Mesenchymal_GATA2_NR2F1	0.498092	0.188901	0.550403	0.263823	PV	0.663696	1.33248	0
CDH11	Mesenchymal_GATA2_NR2F1	0.597796	0.243773	0.531039	0.329559	Coel Epi	0.663554	1.11	0
AKAP12	Mesenchymal_GATA2_NR2F1	0.689934	0.284238	0.667589	0.382545	Neural	0.662963	0.960908	0
NUPR1	Mesenchymal_GATA2_NR2F1	0.576999	0.234338	0.481183	0.317371	PV	0.662213	1.14768	0
SMOC2	Mesenchymal_GATA2_NR2F1	0.34121	0.0817788	0.238163	0.144644	Doublets	0.659723	1.93348	0
TBX3	Mesenchymal_GATA2_NR2F1	0.37322	0.106704	0.528458	0.171286	Neural	0.658518	1.76442	0
F10	Mesenchymal_GATA2_NR2F1	0.347832	0.0877681	0.266182	0.150786	Doublets	0.65806	1.89189	0
OLFML1	Mesenchymal_GATA2_NR2F1	0.374151	0.107937	0.269758	0.172445	PV	0.657636	1.75768	0
CXCL12	Mesenchymal_GATA2_NR2F1	0.636118	0.265985	0.724419	0.355675	Doublets	0.65758	1.03374	0
LITAF	Mesenchymal_GATA2_NR2F1	0.613523	0.255772	0.652419	0.342462	PV	0.657449	1.0716	0
CCDC80	Mesenchymal_GATA2_NR2F1	0.436594	0.153262	0.398253	0.221919	PV	0.657268	1.50544	0
FBN2	Mesenchymal_GATA2_NR2F1	0.369573	0.106365	0.255187	0.170145	Doublets	0.654552	1.7711	0
HIC1	Mesenchymal_GATA2_NR2F1	0.361024	0.105525	0.290007	0.167437	Endothelial	0.645203	1.78715	0
MGP	Mesenchymal_GATA2_NR2F1	0.435611	0.161076	0.583065	0.227601	PV	0.644775	1.48016	0
FSTL1	Mesenchymal_GATA2_NR2F1	0.693995	0.300002	0.663575	0.395473	PV	0.6438	0.927672	0
LHFPL6	Mesenchymal_GATA2_NR2F1	0.483516	0.194629	0.71828	0.264632	PV	0.642794	1.32942	0
FMOD	Mesenchymal_GATA2_NR2F1	0.373311	0.116689	0.323587	0.178873	Epithelial	0.642497	1.72108	0
MOXD1	Mesenchymal_GATA2_NR2F1	0.274098	0.0390632	0.440316	0.0960164	Neural	0.642277	2.34324	0
ALCAM	Mesenchymal_GATA2_NR2F1	0.482443	0.194778	0.551037	0.264485	Coel Epi	0.641636	1.32997	0
PDGFRB	Mesenchymal_GATA2_NR2F1	0.436568	0.164434	0.749328	0.230377	PV	0.640898	1.46804	0
CPE	Mesenchymal_GATA2_NR2F1	0.723108	0.313519	0.801882	0.41277	PV	0.639853	0.884865	0
NPW	Mesenchymal_GATA2_NR2F1	0.464556	0.185397	0.687957	0.253042	Metanephros	0.638392	1.3742	0
COL16A1	Mesenchymal_GATA2_NR2F1	0.387473	0.1311	0.341905	0.193224	Doublets	0.636969	1.64391	0
BGN	Mesenchymal_GATA2_NR2F1	0.71518	0.314044	0.916667	0.411247	PV	0.635482	0.888562	0
PRICKLE1	Mesenchymal_GATA2_NR2F1	0.415189	0.153548	0.294603	0.216948	Mesenchymal_LHX9_ARX	0.634449	1.5281	0
INHBA	Mesenchymal_GATA2_NR2F1	0.361735	0.112834	0.40078	0.173147	Doublets	0.634343	1.75361	0
SOD3	Mesenchymal_GATA2_NR2F1	0.29108	0.0580571	0.462097	0.114523	PV	0.630765	2.16698	0
LTBP4	Mesenchymal_GATA2_NR2F1	0.753023	0.330846	0.688837	0.433147	Mesenchymal_LHX9_ARX	0.630038	0.836678	0
RAMP2	Mesenchymal_GATA2_NR2F1	0.565825	0.254862	0.932499	0.330214	Endothelial	0.626942	1.10801	0
PDGFRL	Mesenchymal_GATA2_NR2F1	0.301375	0.0686088	0.158903	0.125012	Coel Epi	0.626662	2.07934	0
ACTA2	Mesenchymal_GATA2_NR2F1	0.392362	0.141834	0.858199	0.202541	PV	0.626528	1.59681	0
TSHZ2	Mesenchymal_GATA2_NR2F1	0.627077	0.28679	0.707572	0.369248	Doublets	0.624749	0.996287	0
MDFI	Mesenchymal_GATA2_NR2F1	0.62127	0.285343	0.529881	0.366744	Doublets	0.623191	1.00309	0
HTRA3	Mesenchymal_GATA2_NR2F1	0.339619	0.102787	0.325877	0.160176	Mesenchymal_LHX9_ARX	0.622007	1.83148	0
SELENOM	Mesenchymal_GATA2_NR2F1	0.527089	0.23907	0.515718	0.308862	Germ cells	0.619256	1.17486	0
IGFBP5	Mesenchymal_GATA2_NR2F1	0.806412	0.35513	0.676882	0.464484	PV	0.61838	0.766828	0
PLPP1	Mesenchymal_GATA2_NR2F1	0.497653	0.222702	0.504654	0.289328	Germ cells	0.617186	1.2402	0
PLEKHA5	Mesenchymal_GATA2_NR2F1	0.500653	0.225197	0.51124	0.291945	Germ cells	0.6164	1.23119	0
COL21A1	Mesenchymal_GATA2_NR2F1	0.324215	0.09444	0.349597	0.150119	PV	0.614819	1.89633	0
BOC	Mesenchymal_GATA2_NR2F1	0.372069	0.134608	0.249813	0.192149	Coel Epi	0.613722	1.64949	0
STRA6	Mesenchymal_GATA2_NR2F1	0.395763	0.153415	0.283794	0.21214	Neural	0.613633	1.55051	0
PLPP3	Mesenchymal_GATA2_NR2F1	0.475317	0.211257	0.449854	0.275244	Endothelial	0.613205	1.2901	0
FBN1	Mesenchymal_GATA2_NR2F1	0.440163	0.187221	0.433468	0.248514	PV	0.612821	1.39226	0
CDC42EP5	Mesenchymal_GATA2_NR2F1	0.39306	0.152001	0.386593	0.210414	Doublets	0.612655	1.55868	0
THY1	Mesenchymal_GATA2_NR2F1	0.428472	0.179184	0.639113	0.239591	PV	0.612209	1.42882	0
TGFB1I1	Mesenchymal_GATA2_NR2F1	0.421113	0.17396	0.780108	0.23385	PV	0.611909	1.45308	0
COL9A3	Mesenchymal_GATA2_NR2F1	0.479779	0.215993	0.507958	0.279913	Coel Epi	0.61089	1.27328	0
PCDH18	Mesenchymal_GATA2_NR2F1	0.462706	0.204718	0.53871	0.267233	PV	0.610603	1.31963	0
FKBP7	Mesenchymal_GATA2_NR2F1	0.52004	0.242941	0.408063	0.310087	Mesenchymal_LHX9_ARX	0.608916	1.1709	0
HOXC6	Mesenchymal_GATA2_NR2F1	0.2805	0.0620486	0.189328	0.114983	Neural	0.606713	2.16297	0
ADAMTS1	Mesenchymal_GATA2_NR2F1	0.405217	0.166341	0.500806	0.224225	PV	0.605842	1.4951	0
NID1	Mesenchymal_GATA2_NR2F1	0.431873	0.187283	0.623118	0.246552	PV	0.604701	1.40018	0
CAVIN1	Mesenchymal_GATA2_NR2F1	0.42648	0.183478	0.775119	0.242362	Endothelial	0.60446	1.41732	0
MMP14	Mesenchymal_GATA2_NR2F1	0.4819	0.222442	0.441935	0.285313	PV	0.604383	1.25417	0
SSBP2	Mesenchymal_GATA2_NR2F1	0.541083	0.259623	0.59481	0.327826	Metanephros	0.603455	1.11527	0
C7	Mesenchymal_GATA2_NR2F1	0.536349	0.256914	0.759867	0.324626	Mesenchymal_LHX9_ARX	0.603437	1.12508	0
RARRES2	Mesenchymal_GATA2_NR2F1	0.630285	0.306669	0.652946	0.385087	Coel Epi	0.601472	0.954286	0
RCN3	Mesenchymal_GATA2_NR2F1	0.299991	0.0826184	0.206952	0.135292	Doublets	0.600079	2.00032	0
AEBP1	Mesenchymal_GATA2_NR2F1	0.425562	0.186795	0.428714	0.244653	Coel Epi	0.599155	1.40792	0
KLHL13	Mesenchymal_GATA2_NR2F1	0.294132	0.078689	0.278656	0.130895	Neural	0.598077	2.03336	0
CERCAM	Mesenchymal_GATA2_NR2F1	0.383722	0.157539	0.28564	0.212347	Mesenchymal_LHX9_ARX	0.594589	1.54953	0
CREB3L1	Mesenchymal_GATA2_NR2F1	0.40329	0.173733	0.329262	0.229359	Mesenchymal_LHX9_ARX	0.593832	1.47247	0
CLEC11A	Mesenchymal_GATA2_NR2F1	0.705221	0.343425	0.575634	0.431094	Doublets	0.593393	0.841428	0
LMO4	Mesenchymal_GATA2_NR2F1	0.53353	0.265013	0.519578	0.330079	Epithelial	0.591377	1.10842	0
LY6H	Mesenchymal_GATA2_NR2F1	0.35717	0.137962	0.490292	0.19108	Coel Epi	0.591138	1.65506	0
HOXA3	Mesenchymal_GATA2_NR2F1	0.252409	0.0466947	0.218896	0.0965429	Metanephros	0.590073	2.33777	0
TENT5A	Mesenchymal_GATA2_NR2F1	0.322676	0.109794	0.221138	0.161379	Doublets	0.588561	1.824	0
SOCS3	Mesenchymal_GATA2_NR2F1	0.367051	0.148415	0.511144	0.201394	Endothelial	0.588196	1.60249	0
CNN2	Mesenchymal_GATA2_NR2F1	0.504986	0.250486	0.642715	0.312156	Metanephros	0.587931	1.16425	0
SFRP1	Mesenchymal_GATA2_NR2F1	0.627905	0.317047	0.710524	0.392374	Coel Epi	0.587431	0.935541	0
TIMP3	Mesenchymal_GATA2_NR2F1	0.58172	0.29666	0.771922	0.365735	Endothelial	0.585121	1.00585	0
RARRES1	Mesenchymal_GATA2_NR2F1	0.24408	0.0425087	0.262478	0.091353	Coel Epi	0.584089	2.39302	0
MEIS2	Mesenchymal_GATA2_NR2F1	0.433736	0.20504	0.493626	0.260457	Coel Epi	0.583511	1.34532	0
CNRIP1	Mesenchymal_GATA2_NR2F1	0.36277	0.148299	0.418577	0.200269	Neural	0.583368	1.60809	0
DLK1	Mesenchymal_GATA2_NR2F1	0.650552	0.330528	0.869499	0.408075	Mesenchymal_LHX9_ARX	0.583092	0.896304	0
TSPAN4	Mesenchymal_GATA2_NR2F1	0.425057	0.198915	0.588822	0.253713	Metanephros	0.582988	1.37155	0
MATN2	Mesenchymal_GATA2_NR2F1	0.61329	0.314326	0.647869	0.38677	Mesenchymal_LHX9_ARX	0.58258	0.949925	0
WLS	Mesenchymal_GATA2_NR2F1	0.562979	0.28921	0.506974	0.355549	Epithelial	0.582172	1.03409	0
SPATS2L	Mesenchymal_GATA2_NR2F1	0.479261	0.23866	0.614105	0.296962	Metanephros	0.581895	1.21415	0
S100A11	Mesenchymal_GATA2_NR2F1	0.712218	0.357393	0.840893	0.443373	Epithelial	0.579278	0.813343	0
TAGLN	Mesenchymal_GATA2_NR2F1	0.288247	0.0849348	0.768683	0.134201	PV	0.578921	2.00842	0
EFEMP2	Mesenchymal_GATA2_NR2F1	0.605841	0.31701	0.669444	0.386999	Coel Epi	0.575145	0.949333	0
ID2	Mesenchymal_GATA2_NR2F1	0.46387	0.238495	0.544664	0.293107	Neural	0.569269	1.22722	0
TPM2	Mesenchymal_GATA2_NR2F1	0.776536	0.385722	0.933737	0.480423	PV	0.569269	0.733087	0
OAF	Mesenchymal_GATA2_NR2F1	0.373931	0.168666	0.339495	0.218405	Mesenchymal_LHX9_ARX	0.5689	1.5214	0
CAPN6	Mesenchymal_GATA2_NR2F1	0.226387	0.0347532	0.170236	0.0811894	Coel Epi	0.568451	2.51097	0
CHST14	Mesenchymal_GATA2_NR2F1	0.355061	0.153175	0.270083	0.202096	Doublets	0.567748	1.59901	0
NBL1	Mesenchymal_GATA2_NR2F1	0.304996	0.107763	0.246237	0.155556	PV	0.567521	1.86075	0
GPC6	Mesenchymal_GATA2_NR2F1	0.288441	0.0925332	0.461078	0.140005	Metanephros	0.567098	1.96608	0
PTK7	Mesenchymal_GATA2_NR2F1	0.580465	0.312088	0.538622	0.377121	Coel Epi	0.566064	0.97519	0
PDE5A	Mesenchymal_GATA2_NR2F1	0.269378	0.075897	0.29086	0.122781	PV	0.56498	2.09736	0
TWIST2	Mesenchymal_GATA2_NR2F1	0.25475	0.0625078	0.159957	0.109091	Doublets	0.564416	2.21557	0
SEPT11	Mesenchymal_GATA2_NR2F1	0.450174	0.232783	0.776447	0.28546	Metanephros	0.564361	1.25365	0
ASPN	Mesenchymal_GATA2_NR2F1	0.216118	0.0297028	0.154704	0.0748744	PV	0.560165	2.59194	0
SORBS3	Mesenchymal_GATA2_NR2F1	0.480645	0.257787	0.543011	0.311789	PV	0.560157	1.16543	0
ADGRA2	Mesenchymal_GATA2_NR2F1	0.386296	0.18603	0.49422	0.234558	PV	0.560149	1.45005	0
PTN	Mesenchymal_GATA2_NR2F1	0.676393	0.360594	0.599866	0.437118	PV	0.55975	0.827552	0
C1S	Mesenchymal_GATA2_NR2F1	0.321654	0.128883	0.324877	0.175595	Mesenchymal_LHX9_ARX	0.559542	1.73958	0
GPX7	Mesenchymal_GATA2_NR2F1	0.570649	0.312861	0.460897	0.375328	Doublets	0.55921	0.979955	0
COL12A1	Mesenchymal_GATA2_NR2F1	0.240122	0.0520222	0.310753	0.0976022	PV	0.558729	2.32686	0
DCN	Mesenchymal_GATA2_NR2F1	0.890557	0.420835	0.915765	0.534657	Doublets	0.557604	0.626129	0
CNTFR	Mesenchymal_GATA2_NR2F1	0.378652	0.182853	0.505231	0.230299	Doublets	0.556004	1.46838	0
LRP1	Mesenchymal_GATA2_NR2F1	0.572692	0.317374	0.611279	0.379242	Doublets	0.555271	0.96958	0
SPRY1	Mesenchymal_GATA2_NR2F1	0.388675	0.192272	0.565554	0.239864	Epithelial	0.554906	1.42768	0
SERPING1	Mesenchymal_GATA2_NR2F1	0.644227	0.352905	0.770186	0.423497	Coel Epi	0.553525	0.859208	0
MYLK	Mesenchymal_GATA2_NR2F1	0.386981	0.19257	0.7375	0.239679	PV	0.552785	1.42845	0
JPH4	Mesenchymal_GATA2_NR2F1	0.294895	0.108334	0.22088	0.153541	Mesenchymal_LHX9_ARX	0.552571	1.87379	0
PDLIM7	Mesenchymal_GATA2_NR2F1	0.500912	0.278307	0.681452	0.332248	PV	0.551942	1.10187	0
FGF7	Mesenchymal_GATA2_NR2F1	0.220735	0.0377272	0.225134	0.0820732	PV	0.551869	2.50014	0
FKBP10	Mesenchymal_GATA2_NR2F1	0.663964	0.362534	0.578452	0.435576	Coel Epi	0.551811	0.831086	0
GPX8	Mesenchymal_GATA2_NR2F1	0.424527	0.224167	0.433134	0.272718	Metanephros	0.551596	1.29932	0
ROR1	Mesenchymal_GATA2_NR2F1	0.258694	0.073895	0.184318	0.118675	Coel Epi	0.551372	2.13136	0
VCAN	Mesenchymal_GATA2_NR2F1	0.722306	0.384262	0.800674	0.466176	Doublets	0.551258	0.763191	0
CYP1B1	Mesenchymal_GATA2_NR2F1	0.293136	0.107862	0.420287	0.152757	Doublets	0.550775	1.8789	0
TSHZ3	Mesenchymal_GATA2_NR2F1	0.296874	0.112181	0.266478	0.156935	Coel Epi	0.549788	1.85192	0
GSTM2	Mesenchymal_GATA2_NR2F1	0.609979	0.340968	0.539415	0.406154	Epithelial	0.549606	0.901023	0
EVA1B	Mesenchymal_GATA2_NR2F1	0.299525	0.115142	0.580838	0.159821	Metanephros	0.549239	1.8337	0
SSPN	Mesenchymal_GATA2_NR2F1	0.389956	0.198236	0.358752	0.244693	Doublets	0.54896	1.40775	0
ANXA2	Mesenchymal_GATA2_NR2F1	0.468371	0.259032	0.876913	0.309758	Metanephros	0.548914	1.17196	0
MAFB	Mesenchymal_GATA2_NR2F1	0.32093	0.136101	0.870259	0.180888	Metanephros	0.548751	1.70988	0
SLIT3	Mesenchymal_GATA2_NR2F1	0.24655	0.0638851	0.467204	0.108148	PV	0.54839	2.22425	0
HTRA1	Mesenchymal_GATA2_NR2F1	0.354583	0.168281	0.738523	0.213425	Metanephros	0.547642	1.54447	0
APCDD1	Mesenchymal_GATA2_NR2F1	0.247339	0.0651467	0.17848	0.109295	Endothelial	0.547535	2.2137	0
FAM114A1	Mesenchymal_GATA2_NR2F1	0.396487	0.204937	0.337649	0.251353	Doublets	0.547508	1.3809	0
NCAM1	Mesenchymal_GATA2_NR2F1	0.332583	0.148286	0.596443	0.192945	Neural	0.547216	1.64535	0
BASP1	Mesenchymal_GATA2_NR2F1	0.419004	0.223571	0.580952	0.270928	Coel Epi	0.547179	1.3059	0
ITGA8	Mesenchymal_GATA2_NR2F1	0.252435	0.070619	0.190323	0.114676	PV	0.546683	2.16564	0
NLRP1	Mesenchymal_GATA2_NR2F1	0.453162	0.250163	0.648703	0.299353	Metanephros	0.546572	1.20613	0
SLC9A3R2	Mesenchymal_GATA2_NR2F1	0.406976	0.214653	0.78177	0.261257	Metanephros	0.546265	1.34225	0
CTSC	Mesenchymal_GATA2_NR2F1	0.669137	0.37168	0.665721	0.443759	Doublets	0.543656	0.812474	0
MCC	Mesenchymal_GATA2_NR2F1	0.33733	0.156149	0.341983	0.200053	Metanephros	0.542823	1.60917	0
BCHE	Mesenchymal_GATA2_NR2F1	0.291494	0.113165	0.348253	0.156377	PV	0.540862	1.85548	0
GYPC	Mesenchymal_GATA2_NR2F1	0.519885	0.300279	0.900714	0.353493	Erythroid	0.540624	1.03989	0
BIN1	Mesenchymal_GATA2_NR2F1	0.487629	0.279874	0.463997	0.330217	Germ cells	0.540296	1.108	0
MIR99AHG	Mesenchymal_GATA2_NR2F1	0.385235	0.202095	0.341018	0.246473	Doublets	0.539522	1.4005	0
ZNF503	Mesenchymal_GATA2_NR2F1	0.495764	0.286344	0.681304	0.33709	Metanephros	0.539097	1.08741	0
PALLD	Mesenchymal_GATA2_NR2F1	0.439271	0.24637	0.664671	0.293114	Metanephros	0.539071	1.22719	0
FBXO17	Mesenchymal_GATA2_NR2F1	0.408593	0.222698	0.530938	0.267744	Metanephros	0.538413	1.31772	0
FJX1	Mesenchymal_GATA2_NR2F1	0.244532	0.0684227	0.476075	0.111097	PV	0.537323	2.19735	0
THBS2	Mesenchymal_GATA2_NR2F1	0.204167	0.0298724	0.177285	0.0721071	PV	0.536879	2.6296	0
CPED1	Mesenchymal_GATA2_NR2F1	0.24082	0.0650185	0.276478	0.107618	PV	0.536828	2.22916	0
PMP22	Mesenchymal_GATA2_NR2F1	0.5386	0.315629	0.706941	0.369658	Coel Epi	0.536001	0.995176	0
PRELP	Mesenchymal_GATA2_NR2F1	0.232866	0.0578213	0.200806	0.100238	PV	0.535642	2.30021	0
TCEAL7	Mesenchymal_GATA2_NR2F1	0.435727	0.247595	0.529249	0.293183	Neural	0.53462	1.22696	0
EFEMP1	Mesenchymal_GATA2_NR2F1	0.252486	0.0781636	0.541583	0.120405	Metanephros	0.534487	2.11689	0
PIK3R1	Mesenchymal_GATA2_NR2F1	0.347224	0.1736	0.567001	0.215673	Epithelial	0.532639	1.53399	0
COL6A2	Mesenchymal_GATA2_NR2F1	0.888074	0.440834	0.805066	0.549209	Mesenchymal_LHX9_ARX	0.532202	0.599277	0
MMP2	Mesenchymal_GATA2_NR2F1	0.775489	0.416451	0.743941	0.503452	Mesenchymal_LHX9_ARX	0.532192	0.686267	0
NRP1	Mesenchymal_GATA2_NR2F1	0.311644	0.140423	0.536536	0.181913	Endothelial	0.531112	1.70423	0
C7	Mesenchymal_LHX9_ARX	0.759867	0.239901	0.701011	0.324626	Doublets	0.854912	1.12508	0
COL15A1	Mesenchymal_LHX9_ARX	0.495769	0.136801	0.470771	0.195292	Endothelial	0.809718	1.63326	0
DLK1	Mesenchymal_LHX9_ARX	0.869499	0.318253	0.847313	0.408075	Doublets	0.779336	0.896304	0
MSC	Mesenchymal_LHX9_ARX	0.300123	0.0453856	0.266537	0.0868933	Doublets	0.733223	2.44307	0
ARX	Mesenchymal_LHX9_ARX	0.329301	0.0723392	0.266359	0.114209	Doublets	0.714491	2.16972	0
PLAC1	Mesenchymal_LHX9_ARX	0.425989	0.148404	0.437791	0.193634	Metanephros	0.699381	1.64178	0
TSHZ2	Mesenchymal_LHX9_ARX	0.693934	0.306044	0.707572	0.369248	Doublets	0.691357	0.996287	0
LHX9	Mesenchymal_LHX9_ARX	0.502981	0.206137	0.671194	0.254506	Coel Epi	0.688295	1.36843	0
NID1	Mesenchymal_LHX9_ARX	0.490922	0.198982	0.623118	0.246552	PV	0.68738	1.40018	0
PDGFRA	Mesenchymal_LHX9_ARX	0.591014	0.27015	0.702919	0.322432	Mesenchymal_GATA2_NR2F1	0.668946	1.13186	0
TCF21	Mesenchymal_LHX9_ARX	0.564587	0.255495	0.884897	0.30586	Metanephros	0.668826	1.18463	0
LAMA2	Mesenchymal_LHX9_ARX	0.396253	0.147015	0.320802	0.187626	Doublets	0.663052	1.6733	0
CXCL12	Mesenchymal_LHX9_ARX	0.637829	0.30075	0.724419	0.355675	Doublets	0.659349	1.03374	0
STAR	Mesenchymal_LHX9_ARX	0.53264	0.24515	0.562009	0.291995	Supporting	0.65569	1.23102	0
SPARCL1	Mesenchymal_LHX9_ARX	0.697088	0.331556	0.814651	0.391117	PV	0.65439	0.938749	0
EMILIN1	Mesenchymal_LHX9_ARX	0.564856	0.266518	0.664869	0.31513	Mesenchymal_GATA2_NR2F1	0.652279	1.15477	0
ENG	Mesenchymal_LHX9_ARX	0.417045	0.174447	0.814487	0.213977	Endothelial	0.643036	1.54189	0
EGFLAM	Mesenchymal_LHX9_ARX	0.274888	0.0652479	0.309274	0.0994074	PV	0.634588	2.30853	0
NRK	Mesenchymal_LHX9_ARX	0.461013	0.217867	0.48466	0.257486	Doublets	0.625497	1.35679	0
HSPB6	Mesenchymal_LHX9_ARX	0.61973	0.317924	0.729484	0.367101	Mesenchymal_GATA2_NR2F1	0.621042	1.00212	0
COLEC11	Mesenchymal_LHX9_ARX	0.242287	0.045805	0.219529	0.0778204	Germ cells	0.618645	2.55335	0
PDGFRB	Mesenchymal_LHX9_ARX	0.419718	0.19352	0.749328	0.230377	PV	0.616162	1.46804	0
MATN2	Mesenchymal_LHX9_ARX	0.647869	0.335944	0.61329	0.38677	Mesenchymal_GATA2_NR2F1	0.615427	0.949925	0
PPP1R14A	Mesenchymal_LHX9_ARX	0.672661	0.348015	0.830644	0.400914	Doublets	0.614818	0.914009	0
POSTN	Mesenchymal_LHX9_ARX	0.566953	0.299174	0.718556	0.342806	Mesenchymal_GATA2_NR2F1	0.606974	1.07059	0
COL5A1	Mesenchymal_LHX9_ARX	0.495595	0.257884	0.617002	0.296617	Mesenchymal_GATA2_NR2F1	0.602303	1.21531	0
OLFML3	Mesenchymal_LHX9_ARX	0.618807	0.333503	0.796661	0.379991	Mesenchymal_GATA2_NR2F1	0.598762	0.967607	0
SYT1	Mesenchymal_LHX9_ARX	0.378097	0.172167	0.457312	0.205722	Neural	0.597857	1.58123	0
ISLR	Mesenchymal_LHX9_ARX	0.685625	0.366144	0.826395	0.418201	Mesenchymal_GATA2_NR2F1	0.597723	0.871793	0
HTRA3	Mesenchymal_LHX9_ARX	0.325877	0.12792	0.339619	0.160176	Mesenchymal_GATA2_NR2F1	0.596839	1.83148	0
PTCH2	Mesenchymal_LHX9_ARX	0.340706	0.142151	0.469587	0.174504	Doublets	0.594807	1.74581	0
PKDCC	Mesenchymal_LHX9_ARX	0.312721	0.118515	0.285157	0.150159	Doublets	0.592938	1.89606	0
CYP1B1	Mesenchymal_LHX9_ARX	0.314452	0.121282	0.420287	0.152757	Doublets	0.590826	1.8789	0
BGN	Mesenchymal_LHX9_ARX	0.663044	0.362231	0.916667	0.411247	PV	0.589156	0.888562	0
ENC1	Mesenchymal_LHX9_ARX	0.436779	0.226584	0.414549	0.260833	Coel Epi	0.586975	1.34387	0
LHFPL6	Mesenchymal_LHX9_ARX	0.441068	0.230287	0.71828	0.264632	PV	0.586362	1.32942	0
EGFR	Mesenchymal_LHX9_ARX	0.284082	0.09942	0.224597	0.129509	PV	0.580664	2.044	0
LRRN3	Mesenchymal_LHX9_ARX	0.364287	0.172766	0.428048	0.203973	Coel Epi	0.579131	1.58977	0
LTBP4	Mesenchymal_LHX9_ARX	0.688837	0.383374	0.753023	0.433147	Mesenchymal_GATA2_NR2F1	0.576335	0.836678	0
MFAP4	Mesenchymal_LHX9_ARX	0.650696	0.366968	0.802804	0.413199	Mesenchymal_GATA2_NR2F1	0.575102	0.883826	0
PCDH18	Mesenchymal_LHX9_ARX	0.434817	0.234611	0.53871	0.267233	PV	0.573799	1.31963	0
TCIM	Mesenchymal_LHX9_ARX	0.260136	0.0821749	0.558001	0.111172	Endothelial	0.571434	2.19667	0
PLAC9	Mesenchymal_LHX9_ARX	0.444741	0.245851	0.697043	0.278258	PV	0.568915	1.2792	0
PXDN	Mesenchymal_LHX9_ARX	0.513194	0.294905	0.521774	0.330474	PV	0.568223	1.10723	0
ROBO2	Mesenchymal_LHX9_ARX	0.322203	0.142256	0.588157	0.171577	Metanephros	0.567955	1.76272	0
C1S	Mesenchymal_LHX9_ARX	0.324877	0.146535	0.321654	0.175595	Mesenchymal_GATA2_NR2F1	0.565148	1.73958	0
OSR1	Mesenchymal_LHX9_ARX	0.286813	0.111614	0.248094	0.140162	Doublets	0.563576	1.96496	0
CDH11	Mesenchymal_LHX9_ARX	0.50602	0.295209	0.597796	0.329559	Mesenchymal_GATA2_NR2F1	0.561682	1.11	0
DCN	Mesenchymal_LHX9_ARX	0.892541	0.464991	0.915765	0.534657	Doublets	0.558846	0.626129	0
SERPINE2	Mesenchymal_LHX9_ARX	0.644272	0.38118	0.632559	0.424049	Doublets	0.552725	0.857906	0
LOXL2	Mesenchymal_LHX9_ARX	0.338667	0.167742	0.371849	0.195593	Endothelial	0.55261	1.63172	0
WFDC1	Mesenchymal_LHX9_ARX	0.225554	0.0602758	0.214577	0.0872067	Doublets	0.550233	2.43947	0
FBN1	Mesenchymal_LHX9_ARX	0.393676	0.220256	0.440163	0.248514	Mesenchymal_GATA2_NR2F1	0.548098	1.39226	0
COL5A2	Mesenchymal_LHX9_ARX	0.477843	0.287975	0.643683	0.318913	PV	0.546097	1.14284	0
CYGB	Mesenchymal_LHX9_ARX	0.229766	0.0663	0.210277	0.0929356	Neural	0.545889	2.37585	0
TBX2	Mesenchymal_LHX9_ARX	0.285775	0.121952	0.415745	0.148646	Epithelial	0.544741	1.90619	0
HSD11B2	Mesenchymal_LHX9_ARX	0.241018	0.0778505	0.222557	0.104437	Doublets	0.5445	2.25917	0
NR2F2-AS1	Mesenchymal_LHX9_ARX	0.375481	0.209997	0.362537	0.236962	Mesenchymal_GATA2_NR2F1	0.540639	1.43986	0
LRP1	Mesenchymal_LHX9_ARX	0.556047	0.344825	0.611279	0.379242	Doublets	0.539132	0.96958	0
INHBA	Mesenchymal_LHX9_ARX	0.307413	0.147011	0.40078	0.173147	Doublets	0.539083	1.75361	0
BCHE	Mesenchymal_LHX9_ARX	0.289506	0.130462	0.348253	0.156377	PV	0.537174	1.85548	0
SNAI2	Mesenchymal_LHX9_ARX	0.289891	0.132604	0.264566	0.158233	Mesenchymal_GATA2_NR2F1	0.534469	1.84369	0
PCDH9	Mesenchymal_LHX9_ARX	0.392714	0.230294	0.451879	0.256759	Coel Epi	0.533941	1.35962	0
GPC3	Mesenchymal_LHX9_ARX	0.571876	0.360782	0.863606	0.395179	Metanephros	0.53094	0.928417	0
MIR503HG	Mesenchymal_LHX9_ARX	0.335744	0.181041	0.529172	0.206249	Doublets	0.53003	1.57867	0
RPS4Y1	Mesenchymal_LHX9_ARX	0.583974	0.369105	0.971981	0.404117	Doublets	0.529111	0.906051	0
ZEB2	Mesenchymal_LHX9_ARX	0.41943	0.258891	0.648925	0.28505	PV	0.526423	1.25509	0
C3orf58	Mesenchymal_LHX9_ARX	0.389733	0.23597	0.425754	0.261025	Supporting	0.523466	1.34314	0
MEG3	Mesenchymal_LHX9_ARX	0.743518	0.44939	0.844664	0.497316	Neural	0.51937	0.69853	0
MSC-AS1	Mesenchymal_LHX9_ARX	0.185529	0.036602	0.159274	0.0608686	PV	0.519302	2.79904	0
FBLIM1	Mesenchymal_LHX9_ARX	0.287756	0.14105	0.366129	0.164955	PV	0.51856	1.80208	0
OAF	Mesenchymal_LHX9_ARX	0.339495	0.194834	0.373931	0.218405	Mesenchymal_GATA2_NR2F1	0.516508	1.5214	0
RBMS3	Mesenchymal_LHX9_ARX	0.334878	0.191221	0.475494	0.214629	Neural	0.515326	1.53884	0
NKAIN4	Mesenchymal_LHX9_ARX	0.364787	0.222035	0.54808	0.245295	Mesenchymal_GATA2_NR2F1	0.512633	1.40529	0
FN1	Mesenchymal_LHX9_ARX	0.43247	0.282213	0.669437	0.306696	Endothelial	0.511135	1.1819	0
MMP2	Mesenchymal_LHX9_ARX	0.743941	0.456638	0.775489	0.503452	Mesenchymal_GATA2_NR2F1	0.510542	0.686267	0
ABCA10	Mesenchymal_LHX9_ARX	0.17747	0.0331088	0.12183	0.0566314	Doublets	0.509549	2.87119	0
SPON2	Mesenchymal_LHX9_ARX	0.221015	0.0764764	0.198085	0.100028	Doublets	0.508844	2.30231	0
NPW	Mesenchymal_LHX9_ARX	0.368864	0.230496	0.687957	0.253042	Metanephros	0.506893	1.3742	0
EDNRB	Mesenchymal_LHX9_ARX	0.241518	0.0997008	0.341897	0.122809	Neural	0.506493	2.09713	0
COL6A3	Mesenchymal_LHX9_ARX	0.495999	0.337071	0.748253	0.362967	PV	0.502667	1.01344	0
DES	Mesenchymal_LHX9_ARX	0.389118	0.252841	0.517557	0.275046	Mesenchymal_GATA2_NR2F1	0.502279	1.29082	0
PEG3	Mesenchymal_LHX9_ARX	0.581628	0.392869	0.661642	0.423626	Doublets	0.499563	0.858904	0
COL6A1	Mesenchymal_LHX9_ARX	0.698531	0.451572	0.74613	0.491812	Mesenchymal_GATA2_NR2F1	0.495718	0.709658	0
DLC1	Mesenchymal_LHX9_ARX	0.378828	0.250924	0.625403	0.271765	PV	0.493543	1.30282	0
MDFI	Mesenchymal_LHX9_ARX	0.491556	0.342448	0.62127	0.366744	Mesenchymal_GATA2_NR2F1	0.493076	1.00309	0
HOXD9	Mesenchymal_LHX9_ARX	0.308374	0.181752	0.445463	0.202384	Coel Epi	0.492655	1.59759	0
COL14A1	Mesenchymal_LHX9_ARX	0.422642	0.29048	0.628358	0.312015	Mesenchymal_GATA2_NR2F1	0.492253	1.1647	0
SSPN	Mesenchymal_LHX9_ARX	0.349227	0.224345	0.389956	0.244693	Mesenchymal_GATA2_NR2F1	0.491624	1.40775	0
MYC	Mesenchymal_LHX9_ARX	0.323204	0.198406	0.483831	0.218741	Epithelial	0.491227	1.51987	0
RARRES2	Mesenchymal_LHX9_ARX	0.514733	0.35985	0.652946	0.385087	Coel Epi	0.491202	0.954286	0
RNF24	Mesenchymal_LHX9_ARX	0.341995	0.218002	0.375395	0.238206	Germ cells	0.490633	1.43462	0
KLHDC8A	Mesenchymal_LHX9_ARX	0.325146	0.201023	0.373466	0.221248	Supporting	0.490474	1.50847	0
PLAGL1	Mesenchymal_LHX9_ARX	0.548373	0.385224	0.543004	0.411808	Doublets	0.486516	0.887199	0
CD248	Mesenchymal_LHX9_ARX	0.39333	0.271662	0.699362	0.291487	Mesenchymal_GATA2_NR2F1	0.484881	1.23276	0
CREB3L1	Mesenchymal_LHX9_ARX	0.329262	0.209911	0.40329	0.229359	Mesenchymal_GATA2_NR2F1	0.484828	1.47247	0
LAMC1	Mesenchymal_LHX9_ARX	0.344938	0.227303	0.486938	0.24647	Endothelial	0.48309	1.40051	0
ELK1	Mesenchymal_LHX9_ARX	0.425258	0.301199	0.527998	0.321414	Supporting	0.482679	1.13503	0
COL6A2	Mesenchymal_LHX9_ARX	0.805066	0.499403	0.888074	0.549209	Mesenchymal_GATA2_NR2F1	0.482458	0.599277	0
ABCA8	Mesenchymal_LHX9_ARX	0.196011	0.0650083	0.275226	0.0863542	Doublets	0.480089	2.4493	0
FKBP7	Mesenchymal_LHX9_ARX	0.408063	0.291015	0.52004	0.310087	Mesenchymal_GATA2_NR2F1	0.477801	1.1709	0
HIC1	Mesenchymal_LHX9_ARX	0.266368	0.148179	0.361024	0.167437	Mesenchymal_GATA2_NR2F1	0.476039	1.78715	0
STC1	Mesenchymal_LHX9_ARX	0.242172	0.120918	0.231956	0.140676	Doublets	0.474971	1.9613	0
LITAF	Mesenchymal_LHX9_ARX	0.442145	0.323057	0.652419	0.342462	PV	0.473801	1.0716	0
NUPR1	Mesenchymal_LHX9_ARX	0.411756	0.298998	0.576999	0.317371	Mesenchymal_GATA2_NR2F1	0.472566	1.14768	0
MMP14	Mesenchymal_LHX9_ARX	0.376693	0.267525	0.4819	0.285313	Mesenchymal_GATA2_NR2F1	0.472436	1.25417	0
SEZ6L2	Mesenchymal_LHX9_ARX	0.321607	0.212487	0.424901	0.230268	Neural	0.472284	1.46851	0
NDRG2	Mesenchymal_LHX9_ARX	0.331186	0.223963	0.479301	0.241434	PV	0.470667	1.42116	0
PDE7B	Mesenchymal_LHX9_ARX	0.193741	0.0688572	0.145141	0.0892062	Endothelial	0.468235	2.4168	0
NEFL	Mesenchymal_LHX9_ARX	0.153004	0.0262983	0.26996	0.0469442	Neural	0.468009	3.0588	0
FAT3	Mesenchymal_LHX9_ARX	0.199762	0.0773038	0.174144	0.0972574	Doublets	0.465523	2.33039	0
GATA4	Mesenchymal_LHX9_ARX	0.462783	0.348816	0.721136	0.367386	Supporting	0.463403	1.00134	0
COL1A1	Mesenchymal_LHX9_ARX	0.95709	0.549847	0.9933	0.616204	Mesenchymal_GATA2_NR2F1	0.463401	0.484177	0
RAMP2	Mesenchymal_LHX9_ARX	0.417891	0.313147	0.932499	0.330214	Endothelial	0.46303	1.10801	0
EHD2	Mesenchymal_LHX9_ARX	0.305028	0.202446	0.591263	0.219161	PV	0.463017	1.51795	0
OGN	Mesenchymal_LHX9_ARX	0.31903	0.218032	0.5897	0.234489	Mesenchymal_GATA2_NR2F1	0.462704	1.45035	0
ST3GAL4	Mesenchymal_LHX9_ARX	0.330397	0.230646	0.470651	0.2469	Doublets	0.46215	1.39877	0
LAMA4	Mesenchymal_LHX9_ARX	0.292872	0.189742	0.552795	0.206546	Endothelial	0.461927	1.57723	0
CDC42EP5	Mesenchymal_LHX9_ARX	0.295584	0.193834	0.39306	0.210414	Mesenchymal_GATA2_NR2F1	0.460721	1.55868	0
TPM1	Mesenchymal_LHX9_ARX	0.607286	0.442482	0.881586	0.469335	PV	0.459374	0.756438	0
TYRO3	Mesenchymal_LHX9_ARX	0.351766	0.255394	0.608782	0.271097	Metanephros	0.459152	1.30528	0
RPP25	Mesenchymal_LHX9_ARX	0.227958	0.115104	0.218648	0.133493	Coel Epi	0.459041	2.01371	0
SCG5	Mesenchymal_LHX9_ARX	0.353958	0.257888	0.586534	0.273542	Coel Epi	0.458836	1.2963	0
MXRA8	Mesenchymal_LHX9_ARX	0.341706	0.247726	0.826347	0.26304	Metanephros	0.456332	1.33545	0
VCAN	Mesenchymal_LHX9_ARX	0.597861	0.440542	0.800674	0.466176	Doublets	0.456283	0.763191	0
CTSC	Mesenchymal_LHX9_ARX	0.555989	0.421912	0.669137	0.443759	Mesenchymal_GATA2_NR2F1	0.451727	0.812474	0
LAMB1	Mesenchymal_LHX9_ARX	0.302527	0.209601	0.41828	0.224742	PV	0.451613	1.4928	0
PRICKLE1	Mesenchymal_LHX9_ARX	0.294603	0.201832	0.415189	0.216948	Mesenchymal_GATA2_NR2F1	0.450182	1.5281	0
COL18A1	Mesenchymal_LHX9_ARX	0.445799	0.348685	0.696353	0.364509	Epithelial	0.449902	1.0092	0
FXYD1	Mesenchymal_LHX9_ARX	0.328512	0.240961	0.517273	0.255227	Mesenchymal_GATA2_NR2F1	0.448617	1.3656	0
ADAMTS5	Mesenchymal_LHX9_ARX	0.224765	0.119058	0.328898	0.136282	PV	0.447964	1.99303	0
TPM2	Mesenchymal_LHX9_ARX	0.609748	0.455249	0.933737	0.480423	PV	0.446998	0.733087	0
CLEC11A	Mesenchymal_LHX9_ARX	0.530312	0.41178	0.705221	0.431094	Mesenchymal_GATA2_NR2F1	0.44622	0.841428	0
CNRIP1	Mesenchymal_LHX9_ARX	0.277235	0.185287	0.418577	0.200269	Neural	0.44582	1.60809	0
PMP22	Mesenchymal_LHX9_ARX	0.447915	0.354425	0.706941	0.369658	Coel Epi	0.445754	0.995176	0
PTK7	Mesenchymal_LHX9_ARX	0.455955	0.361775	0.580465	0.377121	Mesenchymal_GATA2_NR2F1	0.444643	0.97519	0
NR2F2	Mesenchymal_LHX9_ARX	0.800739	0.530168	0.85793	0.574255	PV	0.444154	0.554681	0
SELENBP1	Mesenchymal_LHX9_ARX	0.30849	0.224199	0.723427	0.237933	Erythroid	0.442919	1.43576	0
C11orf96	Mesenchymal_LHX9_ARX	0.299161	0.213584	0.749194	0.227528	PV	0.442903	1.48048	0
LDLR	Mesenchymal_LHX9_ARX	0.219111	0.115699	0.329491	0.132549	Doublets	0.442779	2.0208	0
CERCAM	Mesenchymal_LHX9_ARX	0.28564	0.19808	0.383722	0.212347	Mesenchymal_GATA2_NR2F1	0.442608	1.54953	0
CRISPLD2	Mesenchymal_LHX9_ARX	0.202012	0.0942832	0.350538	0.111837	PV	0.44255	2.19071	0
FSTL1	Mesenchymal_LHX9_ARX	0.476496	0.379701	0.693995	0.395473	Mesenchymal_GATA2_NR2F1	0.442032	0.927672	0
LRRC17	Mesenchymal_LHX9_ARX	0.361806	0.281768	0.546192	0.294809	Mesenchymal_GATA2_NR2F1	0.441919	1.22143	5.71429e-283
MSMO1	Mesenchymal_LHX9_ARX	0.465399	0.372812	0.727611	0.387898	Doublets	0.440738	0.947012	0
LINC01916	Mesenchymal_LHX9_ARX	0.141579	0.0256843	0.143288	0.0445686	Doublets	0.440415	3.11073	0
CFH	Mesenchymal_LHX9_ARX	0.183894	0.073556	0.312043	0.0915348	Metanephros	0.439697	2.39104	0
RND3	Mesenchymal_LHX9_ARX	0.256059	0.164874	0.336295	0.179732	Epithelial	0.439471	1.71629	0
TGFB1I1	Mesenchymal_LHX9_ARX	0.302277	0.220529	0.780108	0.23385	PV	0.439232	1.45308	0
FBN2	Mesenchymal_LHX9_ARX	0.247692	0.155049	0.369573	0.170145	Mesenchymal_GATA2_NR2F1	0.438688	1.7711	0
MRC2	Mesenchymal_LHX9_ARX	0.288737	0.205636	0.412508	0.219176	Metanephros	0.438267	1.51788	0
COL16A1	Mesenchymal_LHX9_ARX	0.266233	0.179011	0.387473	0.193224	Mesenchymal_GATA2_NR2F1	0.437663	1.64391	0
COL21A1	Mesenchymal_LHX9_ARX	0.230516	0.134468	0.349597	0.150119	PV	0.437135	1.89633	0
ELN	Mesenchymal_LHX9_ARX	0.30347	0.223982	0.542583	0.236934	Mesenchymal_GATA2_NR2F1	0.436989	1.43998	2.9773e-316
IGFBP5	Mesenchymal_LHX9_ARX	0.569453	0.44405	0.806412	0.464484	Mesenchymal_GATA2_NR2F1	0.436673	0.766828	0
HRC	Mesenchymal_LHX9_ARX	0.205166	0.103007	0.326075	0.119653	PV	0.4356	2.12316	0
HMGCS1	Mesenchymal_LHX9_ARX	0.346246	0.273733	0.587161	0.285548	Doublets	0.433965	1.25334	5.76598e-237
C6orf48	Mesenchymal_LHX9_ARX	0.53741	0.428389	0.584868	0.446153	Coel Epi	0.43374	0.807093	0
EPB41L2	Mesenchymal_LHX9_ARX	0.303508	0.227205	0.555848	0.239638	Germ cells	0.433599	1.42862	6.72118e-290
ACTA2	Mesenchymal_LHX9_ARX	0.271465	0.189124	0.858199	0.202541	PV	0.433479	1.59681	0
WNT5A	Mesenchymal_LHX9_ARX	0.237787	0.146798	0.382968	0.161624	Coel Epi	0.433363	1.82249	0
EFNB1	Mesenchymal_LHX9_ARX	0.320992	0.247854	0.727878	0.259771	Metanephros	0.432682	1.34795	3.54657e-254
PLTP	Mesenchymal_LHX9_ARX	0.307855	0.233892	0.833001	0.245944	Metanephros	0.431814	1.40265	1.89601e-268
ADAMTS7	Mesenchymal_LHX9_ARX	0.180874	0.0746343	0.131257	0.0919453	Endothelial	0.431667	2.38656	0
NGFR	Mesenchymal_LHX9_ARX	0.181624	0.0757313	0.494466	0.0929858	Neural	0.431413	2.37531	0
SLC40A1	Mesenchymal_LHX9_ARX	0.507251	0.411964	0.612799	0.42749	Mesenchymal_GATA2_NR2F1	0.431074	0.849824	0
TSPAN5	Mesenchymal_LHX9_ARX	0.33936	0.269566	0.454004	0.280938	Supporting	0.430858	1.26962	9.17606e-222
RHOBTB3	Mesenchymal_LHX9_ARX	0.573281	0.452205	0.691257	0.471933	Doublets	0.430486	0.750917	0
HEYL	Mesenchymal_LHX9_ARX	0.168026	0.0594783	0.415591	0.0771654	PV	0.430449	2.5618	0
SYNE1	Mesenchymal_LHX9_ARX	0.252558	0.168637	0.392473	0.182311	PV	0.429864	1.70204	0
COL4A2	Mesenchymal_LHX9_ARX	0.54266	0.435405	0.900806	0.452882	PV	0.429854	0.792124	0
ADGRA2	Mesenchymal_LHX9_ARX	0.296257	0.222548	0.49422	0.234558	PV	0.429588	1.45005	1.48222e-274
OSR2	Mesenchymal_LHX9_ARX	0.241249	0.154469	0.414491	0.168609	Mesenchymal_GATA2_NR2F1	0.429464	1.78017	0
BIN1	Mesenchymal_LHX9_ARX	0.387502	0.319066	0.487629	0.330217	Mesenchymal_GATA2_NR2F1	0.429354	1.108	1.15485e-196
GSTM5	Mesenchymal_LHX9_ARX	0.254058	0.171205	0.42066	0.184705	Mesenchymal_GATA2_NR2F1	0.429103	1.68899	0
PTN	Mesenchymal_LHX9_ARX	0.518368	0.421302	0.676393	0.437118	Mesenchymal_GATA2_NR2F1	0.428977	0.827552	0
PLOD1	Mesenchymal_LHX9_ARX	0.427104	0.354432	0.512624	0.366274	Coel Epi	0.428972	1.00437	3.04969e-212
RAB34	Mesenchymal_LHX9_ARX	0.486306	0.400683	0.72394	0.414635	Coel Epi	0.428123	0.880358	3.6163e-283
FAM198B	Mesenchymal_LHX9_ARX	0.250866	0.168	0.445744	0.181503	Endothelial	0.428098	1.70649	0
FADS2	Mesenchymal_LHX9_ARX	0.308586	0.238677	0.447597	0.250068	Doublets	0.427707	1.38602	5.92084e-238
COL4A5	Mesenchymal_LHX9_ARX	0.309836	0.24098	0.370296	0.252199	PV	0.42681	1.37754	8.4135e-230
TSC22D3	Mesenchymal_LHX9_ARX	0.416795	0.348157	0.693945	0.359341	Metanephros	0.426582	1.02348	6.36835e-191
COL4A1	Mesenchymal_LHX9_ARX	0.353439	0.289585	0.819489	0.29999	PV	0.425543	1.20401	9.87997e-180
FAT4	Mesenchymal_LHX9_ARX	0.221938	0.132529	0.261734	0.147097	Mesenchymal_GATA2_NR2F1	0.42538	1.91666	0
HHIP	Mesenchymal_LHX9_ARX	0.160717	0.0546859	0.294892	0.0719629	Coel Epi	0.422944	2.6316	0
FAM114A1	Mesenchymal_LHX9_ARX	0.305374	0.240837	0.396487	0.251353	Mesenchymal_GATA2_NR2F1	0.42169	1.3809	8.82928e-203
THY1	Mesenchymal_LHX9_ARX	0.29493	0.228819	0.639113	0.239591	PV	0.421402	1.42882	6.00544e-219
RCN1	Mesenchymal_LHX9_ARX	0.562587	0.455751	0.689132	0.473159	Mesenchymal_GATA2_NR2F1	0.420997	0.748324	0
PLPP1	Mesenchymal_LHX9_ARX	0.339341	0.279592	0.504654	0.289328	Germ cells	0.420849	1.2402	9.79998e-161
COX7A1	Mesenchymal_LHX9_ARX	0.23794	0.157506	0.350134	0.170612	PV	0.420765	1.76836	0
FGFR4	Mesenchymal_LHX9_ARX	0.149735	0.042922	0.186294	0.0603264	Metanephros	0.420453	2.80799	0
OLFML1	Mesenchymal_LHX9_ARX	0.238979	0.159494	0.374151	0.172445	Mesenchymal_GATA2_NR2F1	0.420048	1.75768	0
CHST2	Mesenchymal_LHX9_ARX	0.222746	0.138018	0.233729	0.151824	Doublets	0.419884	1.88504	0
GADD45G	Mesenchymal_LHX9_ARX	0.418641	0.357503	0.786487	0.367465	Doublets	0.419114	1.00113	1.36458e-150
BST2	Mesenchymal_LHX9_ARX	0.746615	0.536274	0.927478	0.570548	Metanephros	0.418969	0.561158	0
BAMBI	Mesenchymal_LHX9_ARX	0.32505	0.266226	0.497278	0.275811	Germ cells	0.418677	1.28804	4.56159e-160
SMOC2	Mesenchymal_LHX9_ARX	0.216456	0.130664	0.34121	0.144644	Mesenchymal_GATA2_NR2F1	0.418515	1.93348	0
BNC2	Mesenchymal_LHX9_ARX	0.272388	0.204059	0.380885	0.215193	Coel Epi	0.418448	1.53622	3.31595e-250
SH3PXD2A	Mesenchymal_LHX9_ARX	0.219457	0.134936	0.308696	0.148708	Neural	0.418234	1.90577	0
INSIG1	Mesenchymal_LHX9_ARX	0.264252	0.194287	0.515104	0.205688	Germ cells	0.417888	1.5814	5.02917e-270
NPHS2	Metanephros	0.902861	0.00764537	0.0301474	0.0118622	Supporting	4.00365	4.4344	0
PTPRO	Metanephros	0.819694	0.00633545	0.0605003	0.0101667	Immune	3.76128	4.58864	0
CLIC5	Metanephros	0.850965	0.00913791	0.0721149	0.0131033	Epithelial	3.68884	4.33489	0
NPHS1	Metanephros	0.691284	0.00663774	0.0244146	0.0098627	Coel Epi	3.19304	4.619	0
TPPP3	Metanephros	0.694611	0.0188206	0.0986559	0.0220038	PV	2.65101	3.81654	0
KLK6	Metanephros	0.747172	0.0323259	0.172745	0.0356931	Epithelial	2.49017	3.3328	0
ENPEP	Metanephros	0.741184	0.0340956	0.384543	0.0374262	PV	2.43507	3.28538	0
SOST	Metanephros	0.604125	0.0187387	0.087257	0.0214961	Supporting	2.31977	3.83988	0
CLDN5	Metanephros	0.664005	0.0282734	0.654001	0.0312679	Endothelial	2.30089	3.46516	0
DDN	Metanephros	0.389887	0.00118081	0.00430277	0.00301177	Germ cells	2.26338	5.80523	0
PODXL	Metanephros	0.879574	0.0774802	0.626698	0.0812584	Coel Epi	2.20784	2.51012	0
FGF1	Metanephros	0.431803	0.00437688	0.0272849	0.00639023	PV	2.18189	5.05299	0
ST3GAL6	Metanephros	0.62475	0.0279333	0.230435	0.0307445	Neural	2.17541	3.48204	0
FRMD1	Metanephros	0.38523	0.0018956	0.0126046	0.00370125	Epithelial	2.15693	5.59908	0
AC092813.2	Metanephros	0.314704	0.000472325	0.00641026	0.00195248	Germ cells	1.96333	6.23865	0
TNNT2	Metanephros	0.44644	0.0109327	0.0625781	0.0129842	Coel Epi	1.93935	4.34402	0
FOXC2	Metanephros	0.530938	0.0256504	0.0716398	0.0280305	PV	1.89782	3.57446	0
TNNI1	Metanephros	0.661344	0.0562193	0.201317	0.0590696	Coel Epi	1.87097	2.82904	0
TMEM178A	Metanephros	0.538922	0.0289913	0.145986	0.0313933	Epithelial	1.8653	3.46116	0
ST6GALNAC3	Metanephros	0.779108	0.0900881	0.23156	0.0933337	Germ cells	1.84771	2.37157	0
CA10	Metanephros	0.485695	0.0205209	0.0659217	0.0227121	Mesenchymal_GATA2_NR2F1	1.83829	3.78486	0
TMEM266	Metanephros	0.42515	0.011383	0.108799	0.013332	Germ cells	1.83562	4.31759	0
ITIH5	Metanephros	0.474385	0.0210279	0.0798419	0.0231634	Neural	1.78614	3.76518	0
BMP7	Metanephros	0.490353	0.0251812	0.228433	0.0273724	Epithelial	1.7644	3.59822	0
NTNG1	Metanephros	0.559548	0.0405129	0.0884264	0.0429577	Germ cells	1.7612	3.14754	0
LINC00472	Metanephros	0.565536	0.0471097	0.314082	0.0495517	Epithelial	1.69929	3.00474	0
MPP5	Metanephros	0.729874	0.0966125	0.41614	0.0995954	Germ cells	1.68356	2.30664	0
AIF1	Metanephros	0.709248	0.0904628	0.741322	0.0933775	Immune	1.6817	2.3711	0
PLA2R1	Metanephros	0.505655	0.0345395	0.0846162	0.0367587	Epithelial	1.67037	3.30338	0
LMX1B	Metanephros	0.277445	0.00113673	0.0144011	0.00243825	Germ cells	1.66924	6.01647	0
NEBL	Metanephros	0.479042	0.029196	0.0753177	0.0313149	Epithelial	1.65924	3.46366	0
KLRB1	Metanephros	0.285429	0.00178224	0.0490595	0.00311833	Immune	1.64706	5.77046	0
NRIP2	Metanephros	0.393879	0.0140249	0.149194	0.0158142	PV	1.63336	4.14685	0
VAMP5	Metanephros	0.731204	0.104554	0.695744	0.107506	Endothelial	1.63074	2.23021	0
MAGI2	Metanephros	0.720559	0.102876	0.204696	0.105785	Supporting	1.61862	2.24635	0
STON2	Metanephros	0.457086	0.02742	0.358301	0.0294439	Epithelial	1.61135	3.52527	0
FOXC1	Metanephros	0.508317	0.0401224	0.111527	0.0423278	Endothelial	1.60746	3.16231	0
PDLIM2	Metanephros	0.700599	0.102602	0.183771	0.105418	Mesenchymal_GATA2_NR2F1	1.57622	2.24982	0
RETREG1	Metanephros	0.538922	0.0514173	0.195984	0.0537136	Coel Epi	1.57586	2.92409	0
AC009336.1	Metanephros	0.264804	0.00143272	0.0055336	0.0026733	Neural	1.56881	5.92444	0
PDLIM5	Metanephros	0.712575	0.108783	0.411509	0.111627	Epithelial	1.56239	2.19259	0
HOXD1	Metanephros	0.4165	0.0216734	0.120478	0.0235332	Germ cells	1.5616	3.74934	0
SYNPO	Metanephros	0.582834	0.0665285	0.130165	0.0689605	Doublets	1.55863	2.67422	0
ITGA3	Metanephros	0.558217	0.061292	0.299142	0.0636327	Coel Epi	1.53768	2.75463	0
SAMD11	Metanephros	0.595476	0.0732702	0.343083	0.07573	Neural	1.53667	2.58058	0
PTH1R	Metanephros	0.591484	0.0720295	0.168264	0.0744764	Mesenchymal_GATA2_NR2F1	1.53624	2.59727	0
VAMP8	Metanephros	0.691949	0.105968	0.635913	0.108728	Epithelial	1.53537	2.21891	0
AQP3	Metanephros	0.577512	0.0696805	0.29294	0.0720726	Germ cells	1.5189	2.63008	0
AIF1L	Metanephros	0.712575	0.117653	0.387127	0.120455	Epithelial	1.50815	2.11648	0
GADD45A	Metanephros	0.784431	0.145586	0.431346	0.148595	Epithelial	1.49554	1.90653	0
SEMA3B	Metanephros	0.636727	0.0931047	0.415799	0.0956654	Coel Epi	1.49433	2.3469	0
MAFB	Metanephros	0.870259	0.177626	0.32093	0.180888	Mesenchymal_GATA2_NR2F1	1.48804	1.70988	0
ANXA1	Metanephros	0.574185	0.0766552	0.470813	0.0789987	Epithelial	1.45747	2.53832	0
TBXAS1	Metanephros	0.343313	0.0128315	0.290673	0.0143882	Immune	1.45611	4.24135	0
SPOCK2	Metanephros	0.726547	0.133249	0.450379	0.136044	Coel Epi	1.4493	1.99478	0
TSPAN2	Metanephros	0.486361	0.0488636	0.260357	0.0509244	Epithelial	1.4481	2.97741	0
SBSPON	Metanephros	0.465735	0.0428871	0.511041	0.0448789	Coel Epi	1.44554	3.10379	0
PTPRQ	Metanephros	0.299401	0.00677944	0.0742438	0.0081578	Coel Epi	1.43975	4.80878	0
HOTAIRM1	Metanephros	0.487691	0.0502869	0.179047	0.0523472	Epithelial	1.43862	2.94986	0
DSC1	Metanephros	0.212908	0.000393604	0.00382271	0.00139463	Epithelial	1.39989	6.57513	0
SNCA	Metanephros	0.644045	0.112168	0.924289	0.114673	Erythroid	1.39479	2.16567	0
FRMD3	Metanephros	0.421823	0.0360321	0.0741935	0.0378493	PV	1.38111	3.27414	0
NPNT	Metanephros	0.687292	0.134625	0.433047	0.137228	Supporting	1.36504	1.98611	0
IQGAP2	Metanephros	0.61477	0.106368	0.276711	0.108762	Immune	1.36392	2.21859	0
NES	Metanephros	0.732535	0.153584	0.38419	0.156311	Neural	1.35952	1.85591	0
MRGPRF	Metanephros	0.528277	0.0756413	0.328091	0.0777734	PV	1.3492	2.55396	0
CXCL14	Metanephros	0.326015	0.0146862	0.124341	0.0161526	Germ cells	1.34503	4.12567	0
ST6GALNAC2	Metanephros	0.27811	0.00677944	0.0885375	0.00805752	Neural	1.34081	4.82115	0
TARID	Metanephros	0.355289	0.0218151	0.0399255	0.0233859	Mesenchymal_GATA2_NR2F1	1.33433	3.75562	0
HIPK2	Metanephros	0.655356	0.128942	0.339395	0.131421	Epithelial	1.32995	2.02935	0
CTGF	Metanephros	0.862941	0.211573	0.550987	0.214641	Epithelial	1.32788	1.53879	0
SLC48A1	Metanephros	0.608117	0.112605	0.237124	0.114939	Supporting	1.31557	2.16335	0
ADAMTS9	Metanephros	0.506986	0.0728829	0.359677	0.0749277	PV	1.31372	2.59123	0
HOXA-AS2	Metanephros	0.363273	0.0254363	0.230189	0.0270276	Epithelial	1.31174	3.6109	0
THSD7A	Metanephros	0.586826	0.10491	0.268716	0.10718	Supporting	1.31053	2.23325	0
ARHGEF3	Metanephros	0.659348	0.136445	0.412221	0.138908	Endothelial	1.30151	1.97394	0
WFIKKN1	Metanephros	0.27811	0.00815863	0.0521739	0.00943021	Neural	1.29706	4.66384	0
KIRREL2	Metanephros	0.299401	0.0125512	0.0389134	0.0139024	Coel Epi	1.28015	4.27569	0
LEFTY1	Metanephros	0.3167	0.0162511	0.0777973	0.0176664	Epithelial	1.27823	4.03609	0
MYH3	Metanephros	0.244178	0.00444615	0.0309097	0.00557539	Germ cells	1.26714	5.18939	0
SRGAP1	Metanephros	0.546241	0.0975792	0.231735	0.0996926	Germ cells	1.25945	2.30566	0
NTRK2	Metanephros	0.552894	0.100552	0.311828	0.102682	PV	1.25845	2.27611	0
NPR1	Metanephros	0.403194	0.0429312	0.254567	0.0446282	Endothelial	1.25369	3.10939	0
PDE4DIP	Metanephros	0.574185	0.11053	0.231999	0.112714	Germ cells	1.25339	2.1829	0
F2R	Metanephros	0.539587	0.0968927	0.475521	0.098978	Endothelial	1.24799	2.31286	0
DACH2	Metanephros	0.371257	0.0338531	0.136274	0.0354424	Epithelial	1.23994	3.33985	0
GFRA3	Metanephros	0.305389	0.0159898	0.48419	0.017353	Neural	1.23805	4.05399	0
PHYHIP	Metanephros	0.37525	0.0367154	0.076359	0.03831	Mesenchymal_GATA2_NR2F1	1.22408	3.26204	0
HOXA9	Metanephros	0.431803	0.0571639	0.208696	0.0589286	Neural	1.22262	2.83143	0
PRUNE2	Metanephros	0.411843	0.0508536	0.179977	0.0525541	Epithelial	1.21325	2.94591	0
CCBE1	Metanephros	0.457086	0.0699513	0.141	0.0717749	Mesenchymal_GATA2_NR2F1	1.20406	2.63422	0
ARMH4	Metanephros	0.600133	0.13232	0.21549	0.134524	Germ cells	1.20388	2.00601	0
NECAB1	Metanephros	0.308716	0.0190977	0.0676402	0.0204619	Supporting	1.20066	3.88919	0
TMEM150C	Metanephros	0.441118	0.064614	0.122087	0.0663875	Supporting	1.19642	2.71225	0
CFAP45	Metanephros	0.218896	0.00328108	0.0608534	0.00429671	Epithelial	1.19296	5.4499	0
PAPPA	Metanephros	0.324019	0.023802	0.076964	0.0252162	Doublets	1.19248	3.68027	0
MCUB	Metanephros	0.481703	0.0832551	0.289726	0.085132	Coel Epi	1.1867	2.46355	0
PARD3B	Metanephros	0.42515	0.0602592	0.148672	0.061978	Epithelial	1.18233	2.78098	0
NDNF	Metanephros	0.328676	0.0263841	0.171569	0.027808	Coel Epi	1.17746	3.58243	0
LINC01031	Metanephros	0.220892	0.00400846	0.0101658	0.00503007	Coel Epi	1.16903	5.29232	0
PLTP	Metanephros	0.833001	0.243165	0.559045	0.245944	Epithelial	1.16841	1.40265	0
SERPIND1	Metanephros	0.28676	0.0162417	0.0794416	0.0175159	Supporting	1.15984	4.04464	0
APLP1	Metanephros	0.424484	0.0640724	0.528063	0.0657701	Neural	1.15527	2.72159	0
UNC5C	Metanephros	0.37525	0.0447575	0.224111	0.0463143	Neural	1.15288	3.07231	0
SULF1	Metanephros	0.590818	0.140079	0.336022	0.142202	PV	1.15239	1.95051	0
P3H2	Metanephros	0.69328	0.188067	0.307114	0.190447	Supporting	1.14972	1.65838	0
LOXL1	Metanephros	0.489687	0.093747	0.201399	0.0956121	Mesenchymal_GATA2_NR2F1	1.14952	2.34746	0
EFEMP1	Metanephros	0.541583	0.118412	0.35836	0.120405	Germ cells	1.14647	2.11689	0
TRAV8-2	Metanephros	0.165669	0.000226716	0.00213302	0.00100601	Immune	1.14341	6.90176	0
HTRA1	Metanephros	0.738523	0.21094	0.453629	0.213425	Coel Epi	1.14062	1.54447	0
CDC14A	Metanephros	0.405855	0.0588706	0.135322	0.060505	Coel Epi	1.13843	2.80503	0
FOXD2	Metanephros	0.202262	0.0027017	0.00750988	0.00364171	Neural	1.13576	5.6153	0
RERG	Metanephros	0.412508	0.0631876	0.365323	0.0648331	PV	1.1286	2.73594	0
PARD6G	Metanephros	0.360612	0.0429942	0.103003	0.0444903	Germ cells	1.1224	3.11248	0
VEGFA	Metanephros	0.642715	0.172477	0.339705	0.174692	Epithelial	1.12136	1.74473	0
TGFBR3	Metanephros	0.712575	0.205622	0.344816	0.20801	Supporting	1.11886	1.57017	0
RIPOR1	Metanephros	0.505655	0.108556	0.316405	0.110427	Endothelial	1.11416	2.20341	3.97368e-315
CXADR	Metanephros	0.525615	0.119476	0.515652	0.121389	Epithelial	1.10839	2.10875	2.11562e-314
DACH1	Metanephros	0.640719	0.17595	0.357174	0.17814	Supporting	1.10536	1.72519	0
GMDS	Metanephros	0.567532	0.140797	0.347998	0.142807	Germ cells	1.10456	1.94626	0
MXRA8	Metanephros	0.826347	0.260374	0.503188	0.26304	Mesenchymal_GATA2_NR2F1	1.10355	1.33545	0
CST5	Metanephros	0.167665	0.000686446	0.0131212	0.00147298	Epithelial	1.09325	6.52047	0
COL4A4	Metanephros	0.252162	0.0120096	0.0597169	0.0131409	Epithelial	1.09237	4.33203	0
DSC2	Metanephros	0.53493	0.128749	0.476289	0.130663	Epithelial	1.08866	2.03514	1.46249e-304
FOXD1	Metanephros	0.223553	0.00670701	0.0337197	0.00772845	Germ cells	1.0871	4.86285	0
HES4	Metanephros	0.620093	0.171744	0.699194	0.173856	PV	1.08487	1.74953	0
CTTNBP2	Metanephros	0.379907	0.0561846	0.28381	0.0577095	Epithelial	1.08362	2.85233	5.31077e-301
KIRREL1	Metanephros	0.570858	0.148241	0.276288	0.150231	Supporting	1.08211	1.89558	2.88279e-308
SDC2	Metanephros	0.667332	0.198887	0.468388	0.201093	Germ cells	1.07039	1.60399	0
PPP2R2B	Metanephros	0.325349	0.0359754	0.339498	0.0373385	Epithelial	1.06966	3.28773	7.40075e-307
SLC9A3R1	Metanephros	0.726547	0.227217	0.676527	0.229569	Coel Epi	1.06915	1.47155	0
SFXN2	Metanephros	0.399202	0.0672654	0.221614	0.0688289	Epithelial	1.06832	2.67613	6.03479e-289
GPHN	Metanephros	0.493014	0.113178	0.274324	0.114968	Germ cells	1.06644	2.1631	2.0177e-286
EVA1B	Metanephros	0.580838	0.157829	0.312477	0.159821	Endothelial	1.06508	1.8337	4.23532e-301
LAMA5	Metanephros	0.43513	0.084902	0.334472	0.0865517	Coel Epi	1.06477	2.44701	5.87216e-284
PRMT6	Metanephros	0.499002	0.117174	0.245377	0.118973	Epithelial	1.06231	2.12886	1.25339e-284
S100A4	Metanephros	0.421823	0.0807203	0.374006	0.0823271	Epithelial	1.05332	2.49706	5.04762e-278
CGNL1	Metanephros	0.550898	0.146802	0.278167	0.148705	Supporting	1.0499	1.90579	1.59701e-285
SLC9A3R2	Metanephros	0.78177	0.258793	0.713555	0.261257	Endothelial	1.04933	1.34225	0
TCF21	Metanephros	0.884897	0.303119	0.60328	0.30586	Mesenchymal_GATA2_NR2F1	1.04827	1.18463	0
ZDHHC6	Metanephros	0.536926	0.141253	0.30313	0.143117	Epithelial	1.04383	1.94409	1.89484e-279
AL161908.1	Metanephros	0.153693	0.000440837	0.00570776	0.00116271	Germ cells	1.0385	6.757	0
ROBO2	Metanephros	0.588157	0.169606	0.322203	0.171577	Mesenchymal_LHX9_ARX	1.03676	1.76272	4.62718e-287
OLFM3	Metanephros	0.320027	0.0382615	0.118577	0.0395887	Neural	1.03343	3.22921	1.30836e-286
SLC37A4	Metanephros	0.417166	0.0824081	0.353756	0.0839849	Epithelial	1.03337	2.47712	7.77963e-267
EPB41L5	Metanephros	0.482369	0.115666	0.458026	0.117393	Germ cells	1.03334	2.14222	8.45744e-267
SULT1C2	Metanephros	0.220892	0.00834126	0.14361	0.00934246	Epithelial	1.03227	4.67319	0
ANXA2	Metanephros	0.876913	0.307074	0.822709	0.309758	Epithelial	1.02771	1.17196	0
AGRN	Metanephros	0.516301	0.136354	0.458312	0.138144	Epithelial	1.022	1.97946	5.94345e-264
CORO2B	Metanephros	0.32668	0.0426667	0.0840054	0.0440045	PV	1.02037	3.12346	1.70589e-276
SYNGR2	Metanephros	0.622089	0.192548	0.69191	0.194571	Epithelial	1.01833	1.63696	3.58221e-287
PLCE1	Metanephros	0.360612	0.0587194	0.134421	0.0601415	Doublets	1.0137	2.81106	1.81101e-263
KYAT1	Metanephros	0.280772	0.0258519	0.100457	0.0270527	Germ cells	1.01358	3.60997	7.46218e-291
DLG2	Metanephros	0.303393	0.0343947	0.205138	0.0356618	Neural	1.01141	3.33368	1.827e-279
DDR1	Metanephros	0.544245	0.15519	0.492096	0.157023	Epithelial	1.0076	1.85136	1.52189e-260
PON2	Metanephros	0.686627	0.232104	0.506871	0.234245	Epithelial	0.996563	1.45139	4.88336e-301
CXXC5	Metanephros	0.730539	0.25458	0.728898	0.256822	Epithelial	0.993074	1.35937	0
MAL2	Metanephros	0.312043	0.0403428	0.475359	0.0416227	Epithelial	0.992018	3.17911	1.90042e-264
CRYAB	Metanephros	0.443779	0.10542	0.408199	0.107014	PV	0.991757	2.2348	3.62541e-242
DUSP23	Metanephros	0.648703	0.215437	0.416572	0.217478	Epithelial	0.989699	1.52566	6.87795e-281
ARID3A	Metanephros	0.360612	0.0633986	0.176071	0.0647986	Immune	0.986805	2.73647	9.16453e-248
F3	Metanephros	0.289421	0.0318945	0.0808654	0.0331076	Doublets	0.986345	3.40799	4.5765e-270
NFE2L3	Metanephros	0.273453	0.0262298	0.292501	0.0273943	Germ cells	0.983726	3.59742	5.13507e-276
PTPRD	Metanephros	0.56487	0.173749	0.261394	0.175592	Doublets	0.982645	1.73959	4.1709e-251
ID4	Metanephros	0.705921	0.246872	0.69284	0.249034	Epithelial	0.981348	1.39017	6.89939e-302
EFNB1	Metanephros	0.727878	0.257556	0.405568	0.259771	Doublets	0.981146	1.34795	1.54909e-313
HMGA1	Metanephros	0.508982	0.145105	0.818669	0.146819	Germ cells	0.976512	1.91856	8.98197e-238
TRIB2	Metanephros	0.586826	0.18797	0.380209	0.189848	Doublets	0.975029	1.66153	2.05841e-252
BISPR	Metanephros	0.28676	0.0323291	0.0817218	0.0335275	Supporting	0.973661	3.39539	1.62521e-263
ST3GAL1	Metanephros	0.437791	0.106632	0.427881	0.108192	Coel Epi	0.973581	2.22385	4.39873e-232
SEPT11	Metanephros	0.776447	0.283137	0.593683	0.28546	PV	0.973394	1.25365	0
TMCC3	Metanephros	0.292748	0.0351693	0.231001	0.0363826	Endothelial	0.970068	3.31366	9.52155e-259
ARHGAP28	Metanephros	0.459747	0.120084	0.265163	0.121684	Endothelial	0.968379	2.10633	2.16528e-229
NEDD9	Metanephros	0.381903	0.0785602	0.369253	0.0799891	Epithelial	0.964635	2.52586	2.368e-231
MYO1E	Metanephros	0.476381	0.131451	0.289003	0.133076	Endothelial	0.960781	2.01684	4.99699e-226
CAST	Metanephros	0.669328	0.23621	0.425881	0.23825	Coel Epi	0.960108	1.43444	7.23319e-273
DRD4	Metanephros	0.200266	0.0075572	0.07183	0.00846494	Germ cells	0.955635	4.77182	2.37797e-308
CDC42EP3	Metanephros	0.474385	0.132257	0.305475	0.133869	Coel Epi	0.953937	2.01089	3.68433e-222
XKR4	Metanephros	0.172322	0.00322126	0.118972	0.00401779	Neural	0.950705	5.51702	0
CRIP2	Metanephros	0.592149	0.200297	0.854129	0.202143	Endothelial	0.946716	1.59878	2.02355e-238
HACD2	Metanephros	0.449767	0.120307	0.302511	0.121859	Germ cells	0.946709	2.10489	2.90611e-217
FYN	Metanephros	0.489687	0.143209	0.373036	0.144841	Endothelial	0.946134	1.93212	4.24036e-219
NPW	Metanephros	0.687957	0.250984	0.464556	0.253042	Mesenchymal_GATA2_NR2F1	0.94539	1.3742	5.4246e-273
TENM2	Metanephros	0.249501	0.0218309	0.056144	0.0229033	Mesenchymal_GATA2_NR2F1	0.942234	3.77648	2.06876e-263
SEMA3G	Metanephros	0.177645	0.00423203	0.0573621	0.00504887	Endothelial	0.93949	5.28859	0
FRAS1	Metanephros	0.38656	0.0870558	0.259645	0.0884666	Coel Epi	0.937459	2.42513	1.89887e-215
RASSF8-AS1	Metanephros	0.449102	0.123337	0.188004	0.124871	Supporting	0.934344	2.08047	1.58141e-210
KLK7	Metanephros	0.175649	0.00415961	0.0708751	0.00496739	Epithelial	0.931792	5.30486	4.01677e-317
TMCO3	Metanephros	0.491018	0.148414	0.275889	0.150028	Neural	0.931429	1.89694	2.69872e-211
KCNH2	Metanephros	0.400532	0.0963511	0.213336	0.0977839	Doublets	0.931235	2.32499	1.56327e-210
DNAJC15	Metanephros	0.596141	0.208065	0.761328	0.209893	Germ cells	0.930669	1.56116	7.22738e-231
GOLIM4	Metanephros	0.556221	0.187428	0.435215	0.189165	PV	0.926183	1.66513	1.46287e-218
HSPB8	Metanephros	0.235529	0.0186379	0.167473	0.0196596	PV	0.925438	3.92919	1.37354e-261
CHD7	Metanephros	0.465735	0.13596	0.465666	0.137514	Germ cells	0.924034	1.98403	1.72078e-205
CYBA	Metanephros	0.628077	0.228429	0.811344	0.230311	Epithelial	0.92222	1.46832	2.76868e-236
ZNF185	Metanephros	0.302063	0.0461335	0.124693	0.0473391	Germ cells	0.921417	3.05042	4.15482e-226
ARHGAP29	Metanephros	0.650699	0.241257	0.625594	0.243186	Endothelial	0.920042	1.41393	2.69782e-243
SYTL1	Metanephros	0.292748	0.0420338	0.272743	0.0432147	Germ cells	0.919689	3.14157	1.30754e-228
GRK5	Metanephros	0.322688	0.0573088	0.275099	0.0585588	Neural	0.915699	2.83772	4.39257e-216
MGAT5	Metanephros	0.359281	0.0769953	0.216807	0.0783249	Germ cells	0.91505	2.54689	4.19533e-207
LINC00682	Neural	0.638735	0.00137103	0.0150158	0.0064247	Germ cells	3.22408	5.04761	0
MAB21L1	Neural	0.512253	0.00119728	0.00728837	0.00524945	Germ cells	2.68914	5.24963	0
STMN2	Neural	0.524901	0.00272626	0.00725438	0.0068666	lowQC	2.61458	4.98109	0
CHGA	Neural	0.583794	0.00733215	0.0345975	0.0119029	Metanephros	2.58678	4.43097	0
SLC18A1	Neural	0.474704	0.000616014	0.00332668	0.00437506	Metanephros	2.57851	5.43183	0
DBH	Neural	0.509486	0.0023756	0.00521234	0.00639649	Mesenchymal_LHX9_ARX	2.57393	5.05201	0
PHOX2A	Neural	0.518972	0.00385088	0.0734984	0.00793529	Germ cells	2.50998	4.83644	0
L1CAM	Neural	0.499605	0.00429947	0.0234528	0.00822675	Epithelial	2.39828	4.80036	0
GDAP1L1	Neural	0.447036	0.00332964	0.00682885	0.00684779	Mesenchymal_GATA2_NR2F1	2.22795	4.98383	0
PHOX2B	Neural	0.390514	0.000334859	0.00465735	0.0034286	Metanephros	2.2164	5.6756	0
SHD	Neural	0.560079	0.0157984	0.322708	0.020114	Germ cells	2.18786	3.90634	0
EEF1A2	Neural	0.499605	0.00934447	0.0795767	0.0132317	Coel Epi	2.16086	4.32514	0
FAM57B	Neural	0.418577	0.00260937	0.00904461	0.00590759	Germ cells	2.14794	5.13152	0
NEFM	Neural	0.56166	0.0182151	0.0455626	0.0225241	Epithelial	2.13047	3.79317	0
SCG3	Neural	0.394466	0.00154793	0.0159847	0.00466339	Endothelial	2.1175	5.36801	0
CHRNA3	Neural	0.522134	0.0145664	0.266772	0.0185909	Germ cells	2.08075	3.98508	0
DDC	Neural	0.421344	0.00461221	0.069532	0.00791649	Epithelial	2.0388	4.83881	0
ELAVL4	Neural	0.444269	0.00833989	0.103793	0.0117964	Germ cells	1.97254	4.43996	0
NSG2	Neural	0.352174	0.0010109	0.0156305	0.00379527	Germ cells	1.96302	5.574	0
GFRA3	Neural	0.48419	0.0136218	0.305389	0.017353	Metanephros	1.9629	4.05399	0
CD24	Neural	0.687747	0.0641224	0.886249	0.0690671	Epithelial	1.83813	2.67268	0
PCBP4	Neural	0.700791	0.0704689	0.146374	0.0754667	Metanephros	1.81089	2.58406	0
SCG2	Neural	0.320553	0.00107408	0.00465735	0.00360723	Metanephros	1.80305	5.62481	0
HOXB9	Neural	0.43083	0.0119475	0.0951879	0.0152689	Germ cells	1.80171	4.18194	0
KCNQ2	Neural	0.547036	0.0335586	0.108799	0.0376299	Germ cells	1.79425	3.27996	0
TUBB2B	Neural	0.81581	0.107013	0.362399	0.112633	Germ cells	1.78142	2.18362	0
TFAP2B	Neural	0.324111	0.00154793	0.0235562	0.00410554	Epithelial	1.78112	5.49542	0
INSM1	Neural	0.311462	0.00100142	0.0132596	0.00346307	Germ cells	1.76462	5.6656	0
RGS4	Neural	0.524111	0.0306301	0.135822	0.034543	Coel Epi	1.76392	3.36555	0
GNG3	Neural	0.479051	0.0232253	0.0434693	0.0268396	Mesenchymal_GATA2_NR2F1	1.73315	3.61788	0
ASCL1	Neural	0.43004	0.0145695	0.0812432	0.0178638	Coel Epi	1.7309	4.02498	0
S100B	Neural	0.431225	0.0157384	0.0683141	0.0190328	Sertoli	1.70834	3.96159	0
ACTC1	Neural	0.391304	0.0100805	0.107833	0.0131033	Germ cells	1.69626	4.33489	0
DLX1	Neural	0.296047	0.00109619	0.0194064	0.00343486	Germ cells	1.67971	5.67378	0
SRRM4	Neural	0.288538	0.000732899	0.00712884	0.00301491	Epithelial	1.67473	5.80419	0
GATA3	Neural	0.459289	0.023099	0.0833764	0.0265575	Epithelial	1.6665	3.62844	0
GAL	Neural	0.364427	0.00795764	0.0400421	0.0107841	Germ cells	1.65074	4.52968	0
TAGLN3	Neural	0.516601	0.0380192	0.157359	0.0418138	Germ cells	1.63996	3.17453	0
CHGB	Neural	0.558893	0.053429	0.216192	0.0574368	Germ cells	1.5968	2.85707	0
NNAT	Neural	0.800791	0.135188	0.317176	0.140466	Germ cells	1.57178	1.96279	0
ATCAY	Neural	0.323715	0.00531668	0.0297475	0.00784127	Coel Epi	1.56949	4.84835	0
DLX2	Neural	0.314625	0.00447953	0.0441693	0.00693868	Germ cells	1.56389	4.97064	0
MPZ	Neural	0.366798	0.0113663	0.027913	0.0141845	Sertoli	1.56095	4.25561	0
HAND2-AS1	Neural	0.525296	0.0487031	0.202316	0.052482	Coel Epi	1.5482	2.94729	0
TH	Neural	0.387747	0.0163639	0.0440125	0.0193086	Mesenchymal_GATA2_NR2F1	1.53052	3.94721	0
TUBB3	Neural	0.71581	0.117482	0.323806	0.122226	Supporting	1.50455	2.10188	0
ISL1	Neural	0.375099	0.0153561	0.12197	0.0182085	Germ cells	1.50259	4.00586	0
TLX2	Neural	0.312253	0.00599272	0.146909	0.00842106	Germ cells	1.49164	4.77702	0
VSTM2L	Neural	0.398419	0.0218353	0.0622227	0.0248213	Mesenchymal_GATA2_NR2F1	1.47258	3.69605	0
INA	Neural	0.343874	0.0115053	0.21268	0.0141406	Germ cells	1.46446	4.2587	0
STMN4	Neural	0.24585	0.000818194	0.0126414	0.00276105	Metanephros	1.44858	5.89214	0
ELAVL3	Neural	0.304743	0.0065645	0.0576045	0.00892877	Germ cells	1.43792	4.71848	0
APLP1	Neural	0.528063	0.0620753	0.424484	0.0657701	Metanephros	1.43717	2.72159	0
IGFBPL1	Neural	0.279051	0.00379402	0.0317	0.00597654	Germ cells	1.42872	5.11991	0
CELF3	Neural	0.268379	0.00292212	0.00665336	0.00502694	Metanephros	1.42052	5.29294	0
INSC	Neural	0.234783	0.000811875	0.00873656	0.00266703	PV	1.39151	5.92679	0
HAND2	Neural	0.490514	0.0551917	0.182235	0.0586434	Coel Epi	1.39123	2.83628	0
MMP17	Neural	0.379842	0.0234465	0.0808654	0.0262723	Doublets	1.38234	3.63924	0
PLPPR5	Neural	0.294071	0.00771124	0.0235562	0.00998179	Epithelial	1.35478	4.60699	0
SST	Neural	0.387352	0.029515	0.0990583	0.0323523	Supporting	1.32903	3.43107	0
FAM162B	Neural	0.464822	0.0548632	0.546628	0.0581138	Germ cells	1.32258	2.84535	0
ATP6V0E2	Neural	0.509091	0.0709996	0.370653	0.0744733	Germ cells	1.32227	2.59732	0
NDRG4	Neural	0.374704	0.0275722	0.0812259	0.0303246	Germ cells	1.30989	3.4958	0
HMGA1	Neural	0.680237	0.142555	0.818669	0.146819	Germ cells	1.30507	1.91856	0
FOXD3-AS1	Neural	0.241502	0.00293476	0.0596242	0.00482636	Germ cells	1.28809	5.33366	0
NT5E	Neural	0.316206	0.0149518	0.176562	0.0173404	Endothelial	1.28212	4.05471	0
DCX	Neural	0.377075	0.0316031	0.0824181	0.0343424	Supporting	1.27126	3.37138	0
GNG4	Neural	0.297628	0.0117074	0.0676836	0.0139745	Endothelial	1.27103	4.27052	0
PTPRR	Neural	0.225692	0.00181329	0.00579557	0.00358843	Germ cells	1.27065	5.63004	0
C14orf132	Neural	0.398419	0.038711	0.137559	0.0415631	Endothelial	1.26719	3.18054	0
ACTL6B	Neural	0.210277	0.000852943	0.00614682	0.00251347	Germ cells	1.25874	5.98609	0
CRABP1	Neural	0.461265	0.0638886	0.168686	0.0670394	Germ cells	1.24656	2.70247	0
RGS5	Neural	0.491304	0.0763258	0.673387	0.0796161	PV	1.24326	2.53054	0
SOX2	Neural	0.226482	0.00254619	0.00618218	0.00432179	Mesenchymal_GATA2_NR2F1	1.23299	5.44409	0
LGI4	Neural	0.297233	0.0141462	0.118952	0.0163908	PV	1.22194	4.11103	0
CDH6	Neural	0.381028	0.0387331	0.400145	0.0414472	Epithelial	1.21294	3.18334	0
MIAT	Neural	0.273123	0.00978673	0.0199333	0.0118747	Germ cells	1.21085	4.43334	0
ICA1	Neural	0.433992	0.0592511	0.353756	0.0622224	Epithelial	1.20521	2.77704	0
FAIM2	Neural	0.383399	0.0404958	0.126888	0.0432147	Germ cells	1.20448	3.14157	0
PCSK1N	Neural	0.576285	0.12012	0.812785	0.123737	Germ cells	1.2042	2.0896	0
TTC9B	Neural	0.193676	0.000533879	0.00904461	0.00206531	Germ cells	1.1974	6.18248	0
DLL3	Neural	0.421344	0.0560384	0.549789	0.0589349	Germ cells	1.19296	2.83132	0
LMO1	Neural	0.320949	0.0219617	0.0892239	0.0243324	Supporting	1.19263	3.71595	0
METRN	Neural	0.467589	0.0768407	0.209422	0.0799389	Epithelial	1.18136	2.52649	0
NGFR	Neural	0.494466	0.089777	0.219086	0.0929858	PV	1.17451	2.37531	0
SEZ6L	Neural	0.206324	0.00180066	0.00950165	0.00342233	Immune	1.17139	5.67743	0
CARTPT	Neural	0.209486	0.0021987	0.0320607	0.00384228	Endothelial	1.1651	5.56169	0
RAB3C	Neural	0.310277	0.0212541	0.100544	0.0235457	Germ cells	1.16317	3.74881	0
GAP43	Neural	0.309486	0.0230358	0.131737	0.0253071	Metanephros	1.13788	3.67667	0
MAB21L2	Neural	0.198419	0.00170273	0.00712366	0.00326249	PV	1.136	5.72526	0
PGAM2	Neural	0.292885	0.018929	0.0773355	0.0211012	Supporting	1.13008	3.85842	0
SNAP25	Neural	0.385375	0.0517231	0.126075	0.0543686	PV	1.1222	2.91197	0
MLLT11	Neural	0.73004	0.212016	0.329846	0.216124	Supporting	1.11835	1.5319	0
CAMKV	Neural	0.194071	0.00163639	0.0331928	0.00316221	Germ cells	1.11717	5.75649	0
CYB561	Neural	0.359684	0.0424292	0.281744	0.0449447	Epithelial	1.11586	3.10232	0
DPYSL4	Neural	0.41502	0.0654144	0.188984	0.0681864	Coel Epi	1.11454	2.68551	0
RAMP1	Neural	0.390514	0.0559847	0.163007	0.0586371	Metanephros	1.10765	2.83639	0
TBX20	Neural	0.211858	0.00373084	0.0360028	0.00538108	Germ cells	1.10693	5.22487	0
CRMP1	Neural	0.661265	0.184871	0.344172	0.188648	Supporting	1.10291	1.66787	0
CHRNA7	Neural	0.333597	0.0348317	0.170969	0.0372006	Germ cells	1.09801	3.29143	0
CDH19	Neural	0.273518	0.0164271	0.0803334	0.0184655	Doublets	1.09184	3.99185	0
EML5	Neural	0.356126	0.0447384	0.1228	0.0472074	Supporting	1.08733	3.0532	0
AL391807.1	Neural	0.325296	0.0333975	0.0701646	0.0357119	Mesenchymal_LHX9_ARX	1.08398	3.33227	0
SOX10	Neural	0.298814	0.0245553	0.159699	0.0267299	Sertoli	1.0823	3.62197	0
ADGRB3	Neural	0.406719	0.0673509	0.12802	0.0700418	Mesenchymal_LHX9_ARX	1.08133	2.65866	0
CADM1	Neural	0.781423	0.246412	0.518355	0.250654	Supporting	1.08124	1.38368	0
PTPRZ1	Neural	0.308696	0.0286241	0.142925	0.0308448	Sertoli	1.07389	3.47879	0
STAC	Neural	0.22253	0.00643182	0.101796	0.00814527	Metanephros	1.07044	4.81032	0
SYT5	Neural	0.231621	0.00820405	0.0943976	0.00997552	Germ cells	1.06722	4.60762	0
PLP1	Neural	0.41581	0.0758266	0.284625	0.0785224	Doublets	1.05798	2.54437	0
CRIP2	Neural	0.66087	0.198477	0.854129	0.202143	Endothelial	1.05658	1.59878	0
DUSP4	Neural	0.2917	0.0249976	0.100457	0.0271122	Germ cells	1.05239	3.60777	0
SYT11	Neural	0.462451	0.0998954	0.199858	0.10277	Doublets	1.0522	2.27526	0
SORCS1	Neural	0.254941	0.0142663	0.0516582	0.0161746	Epithelial	1.05146	4.12431	0
NRXN1	Neural	0.360474	0.0517452	0.116333	0.0541931	Doublets	1.05086	2.9152	0
LINC02381	Neural	0.591304	0.166093	0.567207	0.169465	Epithelial	1.04963	1.77511	0
KHDRBS3	Neural	0.448617	0.0941112	0.356779	0.0969221	Germ cells	1.047	2.33385	0
GNAO1	Neural	0.264427	0.0173906	0.124605	0.0193493	Germ cells	1.04319	3.9451	0
CADM2	Neural	0.352569	0.0500899	0.135406	0.0524882	Germ cells	1.03908	2.94717	0
MOXD1	Neural	0.440316	0.0932646	0.274098	0.0960164	Mesenchymal_GATA2_NR2F1	1.03177	2.34324	0
[truncated: 680 more rows]
