# Supplementary material for: Single-cell roadmap of human gonadal development
Source: Research Square preprint supplement (doi:10.21203/rs.3.rs-496470/v1), 2021-05-21
Supplement: Supplementary file 11 [file d25b4c8aad2c0ca853b0685f.xlsx]

## Sheet: 1_cellphoneDB_germcells-sertoli
interaction	PGC--Sertoli	PGC--Sertoli_WFDC2	PGC--sLGR5_male	pre-spermatogonia--Sertoli	pre-spermatogonia--Sertoli_WFDC2	pre-spermatogonia--sLGR5_male	Sertoli--PGC	Sertoli_WFDC2--PGC	sLGR5_male--PGC	Sertoli--pre-spermatogonia	Sertoli_WFDC2--pre-spermatogonia	sLGR5_male--pre-spermatogonia
2arachidonoylglycerol_byDAGLB_CNR1	0	0	1	0	0	1	0	0	0	0	0	0
IGF1_IGF1R	1	0	0	0	0	0	0	0	0	0	0	0
LRPAP1_SORT1	1	0	0	1	0	0	1	1	0	1	1	0
SFRP1_WNT5B	0	0	0	0	0	0	0	1	0	0	0	0
FRZB_WNT5B	0	0	0	0	0	0	1	1	0	0	0	0
FZD2_LRP5_WNT2B	0	0	0	0	0	0	1	1	1	0	0	0
FZD2_LRP6_WNT2B	0	0	0	0	0	0	1	1	1	0	0	0
FZD3_LRP5_WNT2B	0	0	0	0	0	0	1	1	1	0	0	0
FZD3_LRP6_WNT2B	0	0	0	0	0	0	1	1	1	0	0	0
FZD4_LRP5_WNT2B	0	0	0	0	0	0	1	1	1	0	0	0
FZD4_LRP6_WNT2B	0	0	0	0	0	0	1	1	1	0	0	0
FZD5_LRP5_WNT2B	0	0	0	0	0	0	0	1	0	0	0	0
FZD5_LRP6_WNT2B	0	0	0	0	0	0	0	1	0	0	0	0
FZD6_LRP5_WNT2B	0	0	0	0	0	0	0	1	0	0	0	0
FZD6_LRP6_WNT2B	0	0	0	0	0	0	0	1	0	0	0	0
FZD8_LRP5_WNT2B	0	0	0	0	0	0	0	1	0	0	0	0
FZD8_LRP6_WNT2B	0	0	0	0	0	0	0	1	0	0	0	0
SFRP1_WNT2B	0	0	0	0	0	0	1	1	1	0	1	0
FRZB_WNT2B	0	0	0	0	0	0	1	1	0	1	1	0
FZD3_LRP5_WNT6	1	1	1	1	1	1	0	0	0	0	0	0
FZD3_LRP6_WNT6	1	1	1	1	1	1	0	0	0	0	0	0
FZD4_LRP5_WNT6	0	0	0	1	1	1	0	0	0	0	0	0
FZD4_LRP6_WNT6	0	0	0	1	1	1	0	0	0	0	0	0
SFRP1_WNT6	0	0	0	1	1	1	0	0	0	0	0	0
SFRP2_WNT6	1	1	1	1	1	1	0	0	0	0	0	0
CADM1_NECTIN3	0	0	0	0	0	0	0	0	0	1	1	1
NOTCH2_DLL3	0	0	0	0	0	0	1	1	0	1	1	0
NOTCH2_JAG2	0	0	0	0	0	0	1	1	0	1	1	0
CADM3_CADM1	1	1	1	1	1	1	0	0	0	0	0	0
CADM1_CADM1	0	0	0	1	1	1	0	0	0	1	1	1
CADM3_EPB41L1	1	0	0	1	0	0	0	0	0	0	0	0
COL2A1_integrin_a2b1_complex	0	0	0	0	0	0	0	0	0	1	1	1
COL1A2_integrin_a2b1_complex	0	0	0	0	0	0	0	0	0	1	1	1
COL9A1_integrin_a2b1_complex	0	0	0	0	0	0	0	0	0	1	1	0
COL18A1_integrin_a2b1_complex	0	0	0	0	0	0	0	0	0	1	1	0
COL16A1_integrin_a2b1_complex	0	0	0	0	0	0	0	0	0	1	1	0
COL9A3_integrin_a2b1_complex	0	0	0	0	0	0	0	0	0	1	1	0
COL9A2_integrin_a2b1_complex	0	0	0	0	0	0	0	0	0	0	1	0
COL27A1_integrin_a2b1_complex	0	0	0	0	0	0	0	0	0	1	0	0
LAMC1_integrin_a2b1_complex	0	0	0	0	0	0	0	0	0	1	1	0
FN1_integrin_aVb1_complex	0	0	0	1	1	0	0	0	0	0	0	0
FN1_integrin_aVb5_complex	0	0	0	1	1	0	0	0	0	0	0	0
LAMC1_integrin_a6b1_complex	1	1	0	1	1	0	1	1	0	1	1	0
JAM2_JAM3	0	1	0	0	1	0	1	1	0	1	1	0
JAM3_JAM3	0	1	0	0	1	0	0	1	0	0	1	0
ACVR_1A2B_receptor_Inhibin_ligand_B	1	1	0	0	0	0	0	0	0	0	0	0
ACVR_1B2A_receptor_Inhibin_ligand_B	0	0	0	1	1	0	0	0	0	0	0	0
ACVR_1B2B_receptor_Inhibin_ligand_B	1	1	0	1	1	0	0	0	0	0	0	0
ACVR_1A2B_receptor_INHA	1	1	0	0	0	0	0	0	0	0	0	0
ACVR_1B2A_receptor_INHA	0	0	0	1	1	0	0	0	0	0	0	0
ACVR_1B2B_receptor_INHA	1	1	0	1	1	0	0	0	0	0	0	0
BMPR1A_BMPR2_BMP4	0	0	0	0	0	0	0	0	0	1	1	0
ERBB3_NRG1	0	0	0	0	0	0	1	1	0	1	1	0
ERBB4_HBEGF	0	0	0	0	0	0	0	0	0	1	1	0
CD74_APP	0	0	0	0	1	0	1	1	1	0	0	0
TNFRSF21_APP	0	1	0	0	0	0	0	0	1	0	0	0
ABCA1_APOA1	1	1	0	1	1	0	0	0	0	0	0	0
Epinephrine_byPNMT_ADRA2A	0	1	1	0	0	0	0	0	0	0	0	0
EFNA1_EPHA4	0	0	1	0	0	1	0	0	0	0	0	0
EFNA3_EPHA4	0	0	1	0	0	1	0	0	0	0	0	0
EFNA4_EPHA4	0	0	1	0	0	1	0	0	0	0	0	0
MDK_PTPRZ1	1	1	0	1	1	0	0	0	0	0	0	0
PTN_PTPRZ1	1	1	0	1	1	0	0	0	0	0	0	0
WNT3_SFRP1	0	1	0	0	1	0	0	0	0	0	0	0
WNT3_FRZB	1	1	0	1	1	0	0	0	0	0	0	0
WNT2B_SFRP2	0	0	0	0	0	0	0	0	1	0	0	0
WNT3_WIF1	0	1	0	0	1	0	0	0	0	0	0	0
WNT2B_WIF1	0	1	0	0	1	0	0	0	0	0	0	0
WNT5B_WIF1	0	1	0	0	0	0	0	0	0	0	0	0
AGRN_NCAM1	0	0	0	1	1	0	0	0	0	0	0	0
FGFR1_NCAM1	1	1	0	1	1	0	0	0	0	0	0	1
DLK1_NOTCH2	0	0	0	1	1	0	0	0	0	0	0	0
CXCL12_CXCR4	0	0	1	0	0	1	0	0	0	0	0	0
CXCL14_CXCR4	0	0	1	0	0	1	0	0	0	0	0	0
OXT_OXTR	1	0	0	1	0	0	0	0	0	0	0	0
NRG2_ERBB3	0	0	0	1	1	0	0	0	0	0	0	0
NRG2_ERBB4	0	0	0	1	1	0	0	0	0	0	0	0
NRG1_ERBB4	1	1	0	1	1	0	0	0	0	0	0	0
EPHB6_EFNB1	0	0	0	0	0	1	0	0	0	0	0	0
EPHB4_EFNB1	0	0	1	0	0	1	0	0	0	0	0	0
GPR37_PSAP	0	0	0	0	0	0	1	0	1	0	0	1
TGFB1_TGFbeta_receptor1	0	0	1	0	0	0	0	0	0	0	0	0
TGFB1_TGFbeta_receptor2	0	0	1	0	0	0	0	0	0	0	0	0
RBP4_STRA6	0	0	0	0	0	1	0	0	0	0	0	0
KIT_KITLG	1	1	1	0	0	0	0	0	0	0	0	0
AXL_GAS6	0	0	0	0	0	0	1	1	0	1	1	0
GNRHR_NSMF	0	0	0	0	0	0	0	0	0	0	0	1
BSG_PPIA	1	1	1	0	0	1	0	0	0	0	0	0
RAreceptor_RARA_atRetinoicAcid_byALDH1A2	0	0	0	0	0	0	0	0	0	0	0	1
RAreceptor_RARA_RXRA_atRetinoicAcid_byALDH1A2	0	0	0	0	0	0	0	0	0	0	0	1
RAreceptor_RXRA_atRetinoicAcid_byALDH1A2	0	0	0	0	0	0	0	0	0	0	0	1
RAreceptor_RXRB_atRetinoicAcid_byALDH1A2	0	0	0	0	0	0	0	0	0	0	0	1

## Sheet: 2_cellphoneDB_germcells-sertoli
interaction	PGC--Sertoli	PGC--Sertoli_WFDC2	PGC--sLGR5_male	pre-spermatogonia--Sertoli	pre-spermatogonia--Sertoli_WFDC2	pre-spermatogonia--sLGR5_male	Sertoli--PGC	Sertoli_WFDC2--PGC	sLGR5_male--PGC	Sertoli--pre-spermatogonia	Sertoli_WFDC2--pre-spermatogonia	sLGR5_male--pre-spermatogonia
2arachidonoylglycerol_byDAGLB_CNR1	0	0	1	0	0	1	0	0	0	0	0	0
IGF1_IGF1R	1	0	0	0	0	0	0	0	0	0	0	0
FZD3_LRP5_WNT2B	0	0	0	0	0	0	1	1	1	0	0	0
ACVR_1B2A_receptor_Inhibin_ligand_B	0	0	0	1	1	0	0	0	0	0	0	0
ACVR_1B2A_receptor_INHA	0	0	0	1	1	0	0	0	0	0	0	0
BMPR1A_BMPR2_BMP4	0	0	0	0	0	0	0	0	0	1	1	0
MDK_PTPRZ1	1	1	0	1	1	0	0	0	0	0	0	0
OXT_OXTR	1	0	0	1	0	0	0	0	0	0	0	0
GPR37_PSAP	0	0	0	0	0	0	1	0	1	0	0	1
TGFB1_TGFbeta_receptor1	0	0	1	0	0	0	0	0	0	0	0	0
TGFB1_TGFbeta_receptor2	0	0	1	0	0	0	0	0	0	0	0	0
GNRHR_NSMF	0	0	0	0	0	0	0	0	0	0	0	1
CADM1_NECTIN3	0	0	0	0	0	0	0	0	0	1	1	1
CADM3_CADM1	1	1	1	1	1	1	0	0	0	0	0	0
CADM1_CADM1	0	0	0	1	1	1	0	0	0	1	1	1
CADM3_EPB41L1	1	0	0	1	0	0	0	0	0	0	0	0
COL9A1_integrin_a2b1_complex	0	0	0	0	0	0	0	0	0	1	1	0
COL18A1_integrin_a2b1_complex	0	0	0	0	0	0	0	0	0	1	1	0
COL16A1_integrin_a2b1_complex	0	0	0	0	0	0	0	0	0	1	1	0
LAMC1_integrin_a2b1_complex	0	0	0	0	0	0	0	0	0	1	1	0
FN1_integrin_aVb1_complex	0	0	0	1	1	0	0	0	0	0	0	0
FN1_integrin_aVb5_complex	0	0	0	1	1	0	0	0	0	0	0	0
LAMC1_integrin_a6b1_complex	1	1	0	1	1	0	1	1	0	1	1	0
JAM2_JAM3	0	1	0	0	1	0	1	1	0	1	1	0
