# Supplementary material for: Single-cell roadmap of human gonadal development
Source: Research Square preprint supplement (doi:10.21203/rs.3.rs-496470/v1), 2021-05-21
Supplement: Supplementary file 12 [file e19cc8d627b845a91c40e10a.xlsx]

## Sheet: 1_SVM_predictions_macaque
	prob_coelEpi	prob_ovarianSurf	prob_preGC-II	prob_granulosa	prob_preGC-I	prob_sKITLG	prob_sLGR5	prob_sPAX8e
AAACCCAGTGACTCGC_1	0.207227	0.0601856	0.0507886	0.100887	0.102496	0.154205	0.172971	0.151241
AAACGAACAGGTGGAT_1	0.0760506	0.0345275	0.0781197	0.112996	0.163759	0.477127	0.0480875	0.00933338
AAACGAATCTAGCCAA_1	0.0054104	0.00709217	0.0322584	0.00234396	0.143123	0.787747	0.0216218	0.000403027
AAACGCTAGTGCGCTC_1	0.0606689	0.0189315	0.01704	0.0216591	0.745201	0.025501	0.0969903	0.014008
AAACGCTGTCATACCA_1	0.0115723	0.144941	0.584065	0.0127655	0.192707	0.0327032	0.0163788	0.00486747
AAACGCTGTGCGTTTA_1	0.0148899	0.113379	0.0255658	0.034693	0.500389	0.106068	0.174771	0.0302439
AAAGGATTCTTCCCGA_1	0.0166296	0.263188	0.162978	0.00817876	0.192795	0.270052	0.0663726	0.0198056
AAAGGGCCAGCTTCCT_1	0.0030329	0.0715793	0.0335182	0.00344488	0.287032	0.032557	0.563629	0.00520721
AAAGGGCGTTCCGTTC_1	0.0361031	0.0694336	0.229716	0.0076919	0.149637	0.404129	0.0929534	0.010336
AAAGGTAAGTCTGGAG_1	0.0116006	0.424729	0.420748	0.00342172	0.0180471	0.0749606	0.0276097	0.0188836
AAAGGTAAGTGGTTGG_1	0.0406574	0.361284	0.137855	0.0139667	0.386693	0.0278687	0.0159977	0.0156766
AAAGTCCAGAGAGTTT_1	0.0290948	0.0190717	0.00640578	0.0278233	0.607864	0.113695	0.188883	0.00716223
AAAGTCCAGAGGTGCT_1	0.938916	0.0599189	0.000187244	0.000262856	0.000109812	0.000166281	0.000230567	0.000208335
AAAGTGACAGCGTTTA_1	0.84462	0.154618	5.38537e-05	5.3871e-05	5.19065e-05	0.000158561	0.000114118	0.000329468
AAAGTGACATTGCTTT_1	0.304483	0.091869	0.0106306	0.0390849	0.40125	0.0221917	0.0712597	0.0592304
AAAGTGATCCGAGTGC_1	0.0167695	0.529862	0.123165	0.00181464	0.0229967	0.281729	0.02017	0.00349328
AACAAAGAGACATACA_1	0.00176383	0.00206248	0.00214708	0.00131184	0.314285	0.178134	0.492691	0.00760514
AACAAAGAGATCGACG_1	0.133902	0.260471	0.0600171	0.0580895	0.335356	0.048659	0.0814091	0.0220967
AACAACCCATGACGGA_1	0.0856857	0.203559	0.219592	0.00733738	0.0863782	0.276414	0.103853	0.0171809
AACAACCGTTCTCGTC_1	0.020539	0.926239	0.0153128	0.0029327	0.0112443	0.022174	0.00117885	0.000379214
AACAAGACAGGCGTTC_1	0.736051	0.174033	0.00400447	0.00652871	0.00914731	0.0168425	0.00219	0.0512031
AACACACCAAAGGCAC_1	0.00662541	0.0730925	0.238867	0.00429421	0.036205	0.466168	0.169597	0.00515109
AACACACTCAGCTAGT_1	0.074042	0.567772	0.069564	0.020048	0.0670724	0.050433	0.0893485	0.0617197
AACACACTCCGAACGC_1	0.371285	0.605591	0.00282984	0.00357971	0.00484614	0.00403897	0.00509203	0.00273692
AACAGGGCAAGCTGTT_1	0.145969	0.11099	0.155487	0.0500517	0.117896	0.359406	0.047549	0.0126513
AACCAACTCTTCGTAT_1	0.0418331	0.068179	0.149332	0.0170432	0.19304	0.256152	0.135735	0.138685
AACCACAAGGGTAGCT_1	0.0155743	0.128365	0.161514	0.335573	0.266602	0.0620523	0.0280658	0.00225263
AACCACAGTGGATCGA_1	0.0199792	0.114925	0.116594	0.0447901	0.154322	0.533328	0.0132569	0.0028048
AACCACATCACGAGGA_1	0.00672505	0.181085	0.181889	0.00563335	0.475607	0.0689305	0.0755312	0.00459855
AACCATGTCAAGGAGC_1	0.0376463	0.194493	0.196534	0.0101942	0.323318	0.214298	0.0184797	0.00503632
AACCCAAAGGATTTGA_1	0.96755	0.00018169	9.43125e-06	0.000296572	0.000235465	4.28441e-06	0.000662231	0.0310602
AACCCAACAATTTCCT_1	0.00682728	0.0431377	0.176544	0.398705	0.222	0.115151	0.029084	0.00855062
AACCCAAGTTAAGCAA_1	0.0198096	0.00829031	0.0684571	0.0199209	0.395701	0.195617	0.206386	0.0858181
AACCTGACATGTTCAG_1	0.00577129	0.145026	0.596245	0.00262377	0.215044	0.0194877	0.0132645	0.0025374
AACCTTTAGGATACCG_1	0.101709	0.680601	0.0393818	0.00479727	0.11193	0.0165424	0.0247909	0.0202477
AACCTTTCAAGTCCAT_1	0.122884	0.0288659	0.03986	0.0179705	0.543699	0.0739962	0.129141	0.0435844
AACCTTTCATAACCCA_1	0.0129811	0.298314	0.170271	0.0114516	0.177598	0.0750425	0.240448	0.0138941
AACCTTTGTACGTACT_1	0.0269947	0.100045	0.0762275	0.0348445	0.27487	0.384139	0.0959821	0.00689742
AACCTTTGTAGCTGAG_1	0.0278783	0.0689431	0.0452223	0.00850324	0.00920904	0.779121	0.0560718	0.00505153
AACCTTTTCAAGAGGC_1	0.297818	0.613446	0.00499541	0.00369841	0.0136794	0.0335196	0.0051607	0.027682
AACGAAAGTGTTGACT_1	0.202244	0.00331117	0.00347235	0.0055638	0.0125707	0.0616554	0.505189	0.205994
AACGAAATCGTCGATA_1	0.0117987	0.0835336	0.468784	0.0178546	0.323998	0.0165424	0.0729482	0.00454006
AACGGGATCCAAACCA_1	0.00330873	0.0277897	0.107393	0.0290878	0.68194	0.0798001	0.0661162	0.00456531
AACGTCACAAATTGGA_1	0.0593271	0.158017	0.207226	0.228987	0.285575	0.0375873	0.0172607	0.00601994
AACGTCATCTCACCCA_1	0.0200864	0.00841882	0.206738	0.0141718	0.425435	0.267302	0.0532256	0.00462192
AACTTCTAGCTTCTAG_1	0.966918	0.0329097	3.06093e-05	4.82487e-06	1.42457e-05	3.41785e-05	1.71263e-05	7.10191e-05
AACTTCTCACAAATCC_1	0.0215946	0.00767342	0.0163341	0.00740941	0.524666	0.282131	0.127761	0.0124313
AACTTCTCACGGTCTG_1	0.00690886	0.0525425	0.708109	0.00317153	0.0828392	0.10392	0.0388865	0.00362219
AACTTCTGTGTGGACA_1	0.0238001	0.0565064	0.0507569	0.180303	0.580775	0.0645993	0.0393426	0.00391656
AACTTCTTCTGGGAGA_1	0.70105	0.275942	0.00143492	0.000711848	0.00224859	0.00968427	0.0023258	0.00660251
AAGAACAGTTGGCCTG_1	0.00763276	0.320874	0.492832	0.00261646	0.0240406	0.0875664	0.0415011	0.0229372
AAGAACATCAACTGGT_1	0.00810928	0.018668	0.275077	0.00893836	0.36645	0.210453	0.104931	0.00737385
AAGACAACATAGATGA_1	0.172697	0.253719	0.0336388	0.139094	0.237508	0.0746948	0.0746333	0.0140146
AAGACAATCCTAAACG_1	0.0504204	0.307865	0.0771318	0.0237006	0.0557955	0.376583	0.0715061	0.0369979
AAGACTCAGGGTACAC_1	0.00845081	0.049371	0.160539	0.00265473	0.0172584	0.757459	0.00387822	0.000388701
AAGACTCTCCAGCCTT_1	0.0561258	0.253573	0.100681	0.0684112	0.184196	0.0189327	0.0809445	0.237136
AAGATAGGTCTACGTA_1	0.00740215	0.0320705	0.151058	0.00242559	0.563977	0.176835	0.0588454	0.00738609
AAGCATCTCCATCTAT_1	0.0609301	0.755149	0.022104	0.00585739	0.00940155	0.0171111	0.125643	0.00380429
AAGCCATCACAGACGA_1	0.00630184	0.0150236	0.464649	0.0117092	0.281499	0.168992	0.0471641	0.00466045
AAGCCATGTCACGTGC_1	0.0106169	0.130311	0.0862909	0.00504078	0.134313	0.185889	0.441541	0.0059981
AAGCCATGTGTAACGG_1	0.00774734	0.0483886	0.142152	0.0237587	0.16754	0.514905	0.0702772	0.0252317
AAGCCATTCGTGTTCC_1	0.00714797	0.974242	0.00338453	0.000738294	0.00244755	0.0100232	0.00169917	0.000317431
AAGCGAGAGTACCGGA_1	0.00269377	0.0781292	0.747957	0.00278551	0.052902	0.104914	0.00781108	0.00280677
AAGCGAGCACTGAATC_1	0.0406702	0.0600224	0.064185	0.386469	0.228974	0.128268	0.0274763	0.0639355
AAGCGAGTCTCGTTTA_1	0.0138627	0.134452	0.21479	0.0487486	0.236123	0.243032	0.0984441	0.0105472
AAGCGAGTCTCTGAGA_1	0.0110659	0.0240308	0.159654	0.00169866	0.144652	0.647587	0.0089725	0.00233967
AAGCGTTCAAACGGCA_1	0.000436837	0.00100524	0.3221	0.000101563	0.0471228	0.622155	0.00652794	0.000550554
AAGCGTTCAATCGAAA_1	0.416167	0.360838	0.125156	0.0504045	0.0267119	0.00892567	0.00633226	0.00546351
AAGCGTTTCCACGGAC_1	0.00884057	0.0433072	0.027143	0.0862021	0.40091	0.129554	0.296002	0.00804036
AAGGAATGTACGATTC_1	0.0462413	0.199879	0.117291	0.0517712	0.406783	0.129965	0.0340104	0.0140588
AAGGTAATCGCAGAGA_1	0.00247918	0.00149374	0.00471878	0.945057	0.0384547	0.00286544	0.00277943	0.0021518
AAGTACCGTGGCACTC_1	0.0113549	0.434066	0.261147	0.0015928	0.182707	0.054609	0.040181	0.0143428
AAGTACCTCGAAGGAC_1	0.00861829	0.027222	0.122809	0.443535	0.330045	0.0376246	0.00940829	0.0207377
AAGTACCTCGATACTG_1	0.0367058	0.0406797	0.0991537	0.12643	0.605103	0.0860325	0.00269798	0.00319695
AAGTACCTCTGCGGAC_1	0.0746032	0.918864	0.00201287	0.000176912	0.000312703	0.00245072	0.000361685	0.00121822
AAGTGAAAGATAACAC_1	0.0130832	0.166435	0.169498	0.00263473	0.0284075	0.605555	0.00863388	0.00575329
AAGTGAACACGGCCAT_1	0.138119	0.848173	0.00159597	0.00158996	0.00116851	0.00331239	0.00107997	0.00496081
AAGTGAAGTGTGCCTG_1	0.0214162	0.00957609	0.00681211	0.000297228	0.00245397	0.951123	0.00464071	0.00368022
AAGTTCGGTAGCCCTG_1	0.075855	0.0835866	0.0294152	0.527014	0.133902	0.0910379	0.0545674	0.00462159
AAGTTCGTCGCTTGAA_1	0.0322175	0.954519	0.00390266	0.000187654	0.00217498	0.00535677	0.000949191	0.000692537
AATAGAGGTACGGGAT_1	0.00816391	0.037087	0.152086	0.0505883	0.524297	0.175858	0.049779	0.00214096
AATAGAGGTTCCTAGA_1	0.00318284	0.0781461	0.0269764	0.00176754	0.0104356	0.844785	0.0282254	0.00648126
AATCACGAGCTAGTTC_1	0.0216442	0.0379454	0.0229705	0.0531995	0.20148	0.0674798	0.135668	0.459612
AATCACGGTGTTCCAA_1	0.0185702	0.178889	0.442859	0.00717169	0.0526249	0.28883	0.00780533	0.00325042
AATCGACCAACTGAAA_1	0.00436876	0.00677987	0.0278489	0.0701716	0.286007	0.0473649	0.542184	0.0152746
AATCGACGTTAGAGAT_1	0.0952714	0.57261	0.0492669	0.00577888	0.00930562	0.259263	0.00504955	0.00345541
AATCGACTCTGCGGGT_1	0.00748552	0.00997707	0.0632407	0.0056165	0.589069	0.167371	0.134162	0.0230786
AATGAAGTCTTACGTT_1	0.0704463	0.025214	0.237181	0.0182092	0.310329	0.168866	0.156988	0.0127652
AATGACCCAGTCAGTT_1	0.0076471	0.0591512	0.293537	0.00351646	0.107678	0.493986	0.03187	0.00261368
AATGCCAAGCCTGACC_1	0.0395518	0.7583	0.0588375	0.0173619	0.030702	0.0625486	0.02444	0.00825826
AATGGAAAGAACTGAT_1	0.0203165	0.0428723	0.0779122	0.00837444	0.10568	0.714508	0.0278804	0.00245602
AATGGAAGTTGACGGA_1	0.00692352	0.0128143	0.299043	0.151261	0.229131	0.261216	0.00915812	0.030453
AATGGCTAGACCTCCG_1	0.0831247	0.0394751	0.0207277	0.0109443	0.731472	0.0106564	0.0907118	0.012888
AATGGCTCAAGAATGT_1	0.789074	0.194586	0.00083262	0.00035345	0.00030174	0.0139105	0.000274987	0.00066734
AATTCCTAGTACGTCT_1	0.00984355	0.0941635	0.116381	0.223235	0.388452	0.152733	0.0107912	0.00440124
AATTCCTTCAAGAGTA_1	0.0472522	0.094578	0.0460434	0.109874	0.574505	0.0525976	0.064946	0.0102038
AATTCCTTCGAAGGAC_1	0.0452766	0.0224055	0.0135258	0.148598	0.351576	0.0301606	0.320918	0.0675389
AATTTCCCACAGCATT_1	0.00424255	0.0109516	0.0163417	0.0126216	0.85644	0.0442933	0.0282841	0.0268248
ACAAAGAAGGTACAGC_1	0.00685502	0.010616	0.0130387	0.114669	0.558675	0.0228759	0.11798	0.155291
ACAAAGACAACGGGTA_1	0.000994511	0.000881126	0.00446003	0.938165	0.0464821	0.0082596	0.000614029	0.000143418
ACAAAGATCTCGTGGG_1	0.00258635	0.0249278	0.0185182	0.0010953	0.027206	0.894872	0.0297208	0.00107314
ACAACCACATCCGGCA_1	0.00771673	0.0161279	0.283438	0.00655318	0.509891	0.121032	0.0533156	0.00192585
ACAACCAGTGTTATCG_1	0.0038939	0.009644	0.0675447	0.00262753	0.716192	0.155476	0.0438112	0.000810756
ACAACCAGTTGTCTAG_1	0.0244538	0.0114902	0.0733688	0.0153885	0.466399	0.053245	0.338326	0.0173285
ACAACCATCCATTCAT_1	0.007089	0.0126596	0.0643198	0.556389	0.289974	0.0541742	0.0131829	0.00221204
ACAACCATCCTTTAGT_1	5.65582e-08	1.33317e-08	9.05465e-09	1.33919e-08	1.77211e-08	3.09322e-08	1.9893e-08	1
ACAAGCTGTACAAACA_1	0.0764855	0.741701	0.00666711	0.00789569	0.0209862	0.00908705	0.12952	0.00765832
ACACAGTGTAACAGTA_1	0.0640617	0.51285	0.070677	0.0782949	0.139418	0.113576	0.0158106	0.00531264
ACACAGTGTAACTGCT_1	0.000261654	2.98535e-05	3.87882e-05	0.000403285	0.929693	8.55693e-05	0.0120652	0.0574226
ACACAGTGTCGAACGA_1	0.026661	0.123214	0.0731712	0.0422225	0.656063	0.0592289	0.0102629	0.00917655
ACACAGTGTGCTGATT_1	0.0386261	0.914879	0.0242283	0.000777673	0.00869335	0.00834584	0.00211009	0.00233941
ACACCAAAGCATCTTG_1	0.00252459	0.0117055	0.313229	0.0122079	0.373368	0.253023	0.0286563	0.00528529
ACACGCGAGCTGGCCT_1	0.00247006	0.00088594	0.0120006	0.00308828	0.815386	0.0274669	0.136949	0.00175262
ACACGCGTCCGGTAGC_1	0.0112866	0.0755153	0.114418	0.0053589	0.0975228	0.642796	0.0503633	0.00273893
ACACTGAGTCGTCTCT_1	0.112718	0.0855507	0.0541403	0.00839983	0.437598	0.0397735	0.24064	0.0211799
ACACTGAGTGCACAAG_1	0.0130261	0.0628707	0.137947	0.0420504	0.705872	0.0119742	0.0239426	0.00231726
ACACTGATCAGTAGGG_1	0.00343845	0.0205499	0.723294	0.00018595	0.020236	0.2177	0.0118138	0.00278198
ACACTGATCGTGTGGC_1	0.40656	0.566163	0.00722435	0.000116932	0.000392826	0.018135	0.000572972	0.000835281
ACAGAAAGTCCGAAGA_1	0.104916	0.6512	0.0331823	0.0121349	0.0440599	0.0208834	0.00708779	0.126535
ACAGAAAGTCTAACGT_1	0.00535785	0.152165	0.666843	0.00301657	0.070243	0.0661769	0.0277918	0.00840533
ACAGGGATCACGAGGA_1	0.000551258	0.998997	6.68032e-05	6.05646e-05	5.24202e-05	6.88647e-05	8.5071e-05	0.000117904
ACAGGGATCCCTTGGT_1	0.0887406	0.585323	0.00590833	0.000367615	0.00335086	0.295536	0.0193725	0.00140077
ACATCCCCACGCGTGT_1	0.0100202	0.0882086	0.166623	0.0156833	0.313098	0.331469	0.0680911	0.00680635
ACATCCCGTTAGAAAC_1	0.671595	0.320801	0.000744357	0.000451724	0.000771575	0.000524347	0.00119103	0.00392094
ACATCCCGTTTCGTTT_1	0.0112661	0.208146	0.182341	0.00311631	0.0365656	0.470691	0.0807943	0.00707987
ACATCCCTCCTACGGG_1	0.0299555	0.113004	0.0889642	0.114203	0.427739	0.158381	0.063443	0.0043106
ACATCGAGTAGCTCGC_1	0.194314	0.795385	0.00457832	0.000334082	0.00255628	0.00136908	0.000176084	0.0012871
ACATGCAGTGCCTACG_1	0.0200419	0.0156405	0.0323951	0.373286	0.296735	0.0870836	0.165674	0.00914358
ACATGCATCTTCGCTG_1	0.344593	0.0238576	0.0338433	0.119049	0.143214	0.155145	0.151938	0.0283605
ACCAAACCAGTAGAAT_1	0.00934979	0.293215	0.156211	0.0928153	0.266966	0.102617	0.0701677	0.00865705
ACCAAACGTTTCACTT_1	0.0188901	0.00799058	0.0485264	0.064817	0.506003	0.228559	0.0545076	0.0707067
ACCAACAAGACCAACG_1	0.0187727	0.0568027	0.206246	0.188984	0.30435	0.166627	0.0488538	0.00936346
ACCAACACAATTTCCT_1	0.410686	0.235712	0.0223081	0.0157768	0.0705682	0.215885	0.017834	0.0112297
ACCAACAGTACTCAAC_1	0.0153857	0.0404833	0.167164	0.00321416	0.207846	0.164937	0.394311	0.00665828
ACCACAAGTTAAGGAT_1	0.0366618	0.308041	0.373412	0.0105582	0.0533733	0.153511	0.0499942	0.0144491
ACCATTTAGCCGGATA_1	0.17884	0.0323736	0.0315066	0.0904793	0.557796	0.055082	0.0442181	0.00970443
ACCCAAACATCGAAGG_1	0.976973	0.0210397	0.000128908	0.000554191	0.000232187	0.000527877	0.000345952	0.000198446
ACCCAAAGTATTTCTC_1	0.00492832	0.0352766	0.483417	0.00217176	0.116526	0.327475	0.0253324	0.00487309
ACCCTCAGTTACGATC_1	0.026632	0.0196263	0.0638545	0.113412	0.40134	0.154805	0.0377775	0.182552
ACCCTCATCACAAGAA_1	0.00790489	0.0154957	0.026937	0.0369069	0.149044	0.63664	0.124973	0.00209846
ACCCTCATCGTTCGCT_1	0.0343765	0.0208462	0.122653	0.555488	0.168984	0.028199	0.0257733	0.0436788
ACCCTTGAGTCAGCCC_1	0.00494053	0.518046	0.406279	0.0012395	0.0134499	0.0497016	0.00258321	0.00375995
ACCCTTGCACCAATTG_1	0.00230124	0.0179271	0.0977699	0.00207407	0.539546	0.317348	0.0222844	0.000749829
ACCCTTGTCACTCCGT_1	0.0249543	0.013629	0.0291345	0.133723	0.346204	0.262185	0.165818	0.0243525
ACCGTTCAGATACCAA_1	0.0527528	0.109505	0.0553947	0.0143473	0.0959351	0.16282	0.198286	0.310959
ACCGTTCAGGCTCACC_1	0.00338696	0.216069	0.325748	0.00427806	0.178688	0.21606	0.0526869	0.0030836
ACCGTTCGTTTGACAC_1	0.750242	0.135749	0.00469864	0.00142533	0.00161383	0.0844394	0.00311674	0.0187149
ACCTACCAGGGCGAAG_1	0.00607206	0.00808164	0.0954881	0.0287767	0.785693	0.0571779	0.0153934	0.00331724
ACCTACCTCTGGTGCG_1	0.022874	0.0697377	0.00871011	0.694684	0.15328	0.0359776	0.0138588	0.00087773
ACCTGAAAGCTACGTT_1	0.303535	0.000866515	0.000118175	0.00123035	0.00624738	0.000117667	0.0020527	0.685832
ACCTGAACAGAGTCAG_1	0.00145957	0.00320171	0.0880135	0.00390654	0.0773259	0.727656	0.0880461	0.0103909
ACCTGAAGTATGCAAA_1	0.0142117	0.110353	0.48449	0.0503864	0.0625245	0.260841	0.0132506	0.00394334
ACCTGAAGTTGGACCC_1	0.00151325	0.0118229	0.00841225	0.000111772	0.00984062	0.923297	0.0435332	0.00146856
ACGATCACACTTGACA_1	0.446001	0.484764	0.0193072	0.0078029	0.00935121	0.0126734	0.0125027	0.00759809
ACGATCACAGTGGCTC_1	0.00261282	0.00444845	0.0266532	0.0302838	0.809827	0.019966	0.0615024	0.044706
ACGATCAGTACCCGAC_1	0.633894	0.163004	0.00744971	0.00242443	0.00616697	0.168131	0.00474371	0.0141867
ACGATGTAGTTAGTGA_1	0.0668314	0.0241917	0.138013	0.0525566	0.275367	0.217134	0.152101	0.0738044
ACGATGTCACAGAAGC_1	0.0451401	0.279584	0.10224	0.0453485	0.249049	0.212551	0.0568674	0.00921931
ACGCACGCATACTGTG_1	0.0320615	0.933614	0.00455653	0.00425704	0.00308645	0.00428163	0.014997	0.00314542
ACGCACGCATAGCTGT_1	0.148243	0.0470295	0.0955783	0.0209605	0.338256	0.0693057	0.150461	0.130167
ACGCACGGTGTAGTGG_1	0.00474063	0.0719109	0.0875867	0.0443055	0.499266	0.277073	0.0129818	0.00213539
ACGCACGTCAGCGCGT_1	0.00446848	0.103578	0.408814	0.0023837	0.360899	0.0754628	0.0409554	0.00343919
ACGGAAGAGGTGCTTT_1	0.000464567	0.00129875	0.168442	0.0446507	0.61516	0.15892	0.0107252	0.000339106
ACGGAAGGTCGACTTA_1	0.0726448	0.428096	0.00968632	0.00980223	0.0223277	0.416425	0.0373365	0.00368122
ACGGAAGGTCGATGCC_1	0.0059708	0.059201	0.121243	0.00719657	0.184776	0.0439065	0.561188	0.0165176
ACGGAAGGTTGGCCGT_1	0.00878951	0.0667349	0.343756	0.00298117	0.538733	0.0289619	0.00832875	0.00171466
ACGGAAGTCGATACTG_1	0.532183	0.458174	0.00147663	0.000364572	0.000644429	0.00498649	0.000818202	0.00135194
ACGGGTCCACGCCACA_1	0.000781885	0.105732	0.641624	0.00581755	0.187393	0.0067037	0.046333	0.00561405
ACGGGTCCAGAACATA_1	0.0490358	0.0823048	0.0800006	0.134206	0.220182	0.164471	0.244709	0.02509
ACGGTCGAGTTGAAGT_1	0.0391282	0.13987	0.0499991	0.00814464	0.624401	0.0244677	0.0804537	0.0335358
ACGGTCGGTCAGGTAG_1	0.0151135	0.146863	0.0460403	0.0263596	0.536877	0.114517	0.103794	0.0104359
ACGGTTAGTAATGATG_1	0.0228712	0.153714	0.162285	0.0561645	0.574288	0.0222146	0.00469944	0.00376399
ACGGTTAGTATTGAGA_1	0.625044	0.342111	0.00452058	0.000644749	0.00412389	0.0101753	0.00957197	0.00380824
ACGGTTAGTCGTGTTA_1	0.0461981	0.0408584	0.0547866	0.00276849	0.105194	0.524318	0.214658	0.0112185
ACGTAACAGGAGGTTC_1	0.00784556	0.0279225	0.0996935	0.566574	0.15736	0.113824	0.0225649	0.00421628
ACGTAACAGGTAACTA_1	0.0070539	0.849408	0.106791	0.00191798	0.0107645	0.0172565	0.00269323	0.00411504
ACGTAACCACAGTCGC_1	0.0304345	0.0308544	0.540018	0.00813267	0.0623013	0.154235	0.0288297	0.145195
ACGTACAGTAGTCGGA_1	0.495777	0.340326	0.00458371	0.0354987	0.0148234	0.0188764	0.0306026	0.0595121
ACGTACAGTCACTGAT_1	0.00805873	0.657612	0.171902	0.00597547	0.00366504	0.142598	0.0049426	0.00524648
ACGTACATCATGGATC_1	0.00121261	0.0286232	0.0674088	0.000566617	0.183375	0.638957	0.0749533	0.00490377
ACGTACATCCTCGATC_1	0.00779123	0.00776453	0.151774	0.00770421	0.26684	0.275	0.218848	0.0642779
ACGTACATCGACTCCT_1	0.0619936	0.886944	0.00783633	0.000522148	0.00967179	0.0292743	0.00296984	0.000787459
ACGTAGTGTGTACATC_1	0.0108775	0.000427278	8.87649e-05	0.00126669	0.605205	0.000339414	0.0161462	0.365649
ACGTAGTTCCGCTAGG_1	0.00222154	0.813575	0.106663	0.0044216	0.0304173	0.0153135	0.0171832	0.0102055
ACGTTCCAGATTGGGC_1	0.0153154	0.155551	0.38889	0.0892033	0.190082	0.120936	0.0235454	0.0164761
ACGTTCCCACAACGCC_1	0.0915583	0.875352	0.00518646	0.0191495	0.0060604	0.00046937	0.00056556	0.00165885
ACGTTCCTCTTAATCC_1	0.0179296	0.0422365	0.0283448	0.602976	0.270559	0.0223986	0.0118665	0.00368816
ACTACGATCCAACTGA_1	0.00528592	0.123609	0.0812976	0.00338733	0.0232374	0.679265	0.0823495	0.00156873
ACTACGATCCGTTGGG_1	0.0828791	0.0499752	0.0130113	0.110981	0.595737	0.0705257	0.0686123	0.00827781
ACTATGGTCGCAACAT_1	0.00156008	0.00717184	0.528133	0.00255699	0.423188	0.0316613	0.00421093	0.00151841
ACTATTCGTACTCCGG_1	0.0230266	0.0669918	0.123145	0.435061	0.245436	0.0851941	0.0188279	0.00231677
ACTATTCGTGCTCTTC_1	0.607503	0.0763771	0.111023	0.0142619	0.108169	0.0488688	0.0267096	0.00708864
ACTATTCTCATAAGGA_1	0.00413362	0.0807665	0.67639	0.00493283	0.150128	0.0427537	0.0368686	0.00402651
ACTCTCGCATCGTTCC_1	0.0676719	0.0192078	0.00689235	0.0856981	0.360566	0.0640244	0.379718	0.0162219
ACTGATGCATTGCTGA_1	0.00515787	0.0818262	0.0713846	0.00128023	0.0742629	0.697681	0.065048	0.00335889
ACTGATGTCCGGGACT_1	0.179978	0.0838262	0.00905039	0.0723321	0.108229	0.481206	0.0459376	0.0194411
ACTGCAATCTCATTGT_1	0.0877075	0.221847	0.0853074	0.011851	0.0586515	0.48669	0.0445517	0.00339403
ACTGTCCAGACCTGGA_1	0.0131494	0.0478931	0.0466887	0.0273251	0.701713	0.109641	0.0485653	0.0050244
ACTGTCCAGCATCAAA_1	0.0143139	0.0296997	0.534412	0.194645	0.118231	0.0850964	0.0173885	0.00621315
ACTGTCCAGGTCGTGA_1	0.0120999	0.282003	0.0469381	0.0106407	0.13892	0.156712	0.30719	0.0454956
ACTGTCCCAGAACGCA_1	0.0274521	0.031078	0.248085	0.0167858	0.424089	0.224857	0.0247441	0.00290977
ACTGTCCGTGTGTGTT_1	0.0206692	0.0197947	0.124331	0.047451	0.411652	0.284331	0.083552	0.00821924
ACTGTCCTCCGACAGC_1	0.0175335	0.0959288	0.176311	0.0527791	0.407162	0.18166	0.0596299	0.0089952
ACTGTGATCCGGTAAT_1	0.25602	0.148314	0.053369	0.0986742	0.264281	0.133515	0.0339168	0.0119107
ACTTAGGGTCGTATGT_1	0.0702574	0.539664	0.118514	0.00400131	0.0303137	0.207469	0.0133771	0.0164028
ACTTAGGTCAGATTGC_1	0.0359343	0.0255908	0.0413159	0.383752	0.233359	0.254286	0.02126	0.00450192
ACTTATCAGCCTATCA_1	0.017278	0.580406	0.211771	0.0293542	0.0525291	0.0536351	0.0410004	0.0140259
ACTTATCCAGAATCGG_1	0.0054958	0.403123	0.0932819	0.0390742	0.289458	0.0988065	0.0662545	0.00450578
ACTTCCGAGACATGCG_1	0.00345981	0.199594	0.196174	0.00305803	0.0282939	0.496685	0.0639531	0.0087831
ACTTCCGTCAAGCTTG_1	0.00279828	0.00401623	0.0224355	0.0544612	0.852514	0.0406638	0.0134002	0.00971063
ACTTCCGTCACATACG_1	0.00387321	0.0562585	0.51564	0.00238642	0.317232	0.0816042	0.0156244	0.00738203
ACTTCCGTCCTCTTTC_1	0.0337048	0.945607	0.00169824	0.000618497	0.00354925	0.00525927	0.00526963	0.00429347
ACTTCGCGTTTCGTGA_1	0.00354719	0.00593445	0.16092	0.0338837	0.545408	0.065567	0.167588	0.0171517
ACTTCGCTCGAGAGCA_1	0.0994024	0.141008	0.0515783	0.00380786	0.106135	0.537988	0.0248279	0.0352526
ACTTTCACAATTGCTG_1	0.000934485	0.0253497	0.637444	0.000774725	0.0285375	0.303141	0.00319694	0.000621398
ACTTTCATCTCCATAT_1	0.00156334	0.118324	0.708564	0.00173066	0.0883471	0.0668546	0.0132924	0.00132407
ACTTTGTAGCTTCATG_1	0.0369386	0.101655	0.290795	0.0156329	0.211794	0.284835	0.0568178	0.00153136
ACTTTGTCACGTTGGC_1	0.0047189	0.167682	0.0349804	0.00417699	0.111383	0.126259	0.540741	0.0100589
ACTTTGTGTGGCAGAT_1	0.0053529	0.00871493	0.0314461	0.00209165	0.317413	0.529027	0.102991	0.00296434
ACTTTGTTCTTAAGGC_1	0.00460548	0.0468495	0.0239217	0.00970828	0.0365116	0.0460498	0.830558	0.00179521
AGAAATGAGATAGTCA_1	0.357192	0.0604628	0.088358	0.0473207	0.187535	0.171286	0.0478185	0.0400272
AGAAATGTCGTCGGGT_1	0.00513881	0.0753332	0.519872	0.0266597	0.0631418	0.187463	0.107322	0.0150697
AGAAATGTCTCACTCG_1	0.0388719	0.36748	0.129531	0.0194949	0.161416	0.232355	0.0383357	0.012516
AGAACAACACGATTCA_1	0.00327953	0.135022	0.153621	0.0154904	0.359478	0.249096	0.0805723	0.0034409
AGAACAATCATACAGC_1	0.0260431	0.163132	0.0555426	0.0832476	0.607104	0.0201582	0.0319744	0.0127991
AGACAAAGTCAACCTA_1	0.19405	0.683603	0.0175738	0.0018563	0.0338856	0.0117242	0.0472497	0.0100582
AGACAAAGTTACGTAC_1	0.0212453	0.00803608	0.0740704	0.077591	0.470485	0.259045	0.0692562	0.0202716
AGACAAATCCGGTTCT_1	0.00340487	0.0148381	0.538339	0.189204	0.165501	0.0727751	0.0139102	0.00202775
AGACAAATCTGGCTGG_1	0.0674583	0.00758207	0.00573934	0.0084119	0.510852	0.0136216	0.108897	0.277438
AGACCATAGAGGGTAA_1	0.0175487	0.0460573	0.321235	0.00335705	0.129584	0.46291	0.0167629	0.00254535
AGACCATAGGTTGGTG_1	0.00281286	0.0635002	0.169344	0.00282747	0.026701	0.687693	0.0125296	0.0345913
AGACCATGTCTGTGCG_1	0.00333449	0.0513136	0.58662	0.00319049	0.0403249	0.307108	0.00705369	0.00105544
AGACCATTCGACGACC_1	0.00975342	0.665545	0.153694	0.0542808	0.0376259	0.0615988	0.0154978	0.00200429
AGACCCGCAACTGGTT_1	0.0349197	0.00470582	0.0108964	0.0721951	0.726984	0.0871514	0.0304139	0.0327338
AGACCCGGTGAATTAG_1	0.0109781	0.0176032	0.273979	0.0152152	0.436032	0.0904172	0.146029	0.00974566
AGACTCAGTCACTACA_1	0.172316	0.0230566	0.0278391	0.0396567	0.458714	0.246629	0.0264868	0.00530179
AGAGAATCAAGAAATC_1	0.808592	0.00109886	0.000296446	0.00222192	0.0273055	0.000829913	0.00998934	0.149666
AGAGAATCATGCTGCG_1	0.16823	0.0152907	0.148877	0.101727	0.0608067	0.381897	0.110048	0.0131249
AGAGAATCATGGCCAC_1	0.00364706	0.007417	0.0770108	0.0027692	0.0862592	0.48483	0.318221	0.0198458
AGAGAATTCGAGCCAC_1	3.51006e-05	1.00006e-05	1.26341e-05	0.000546934	0.00263123	0.000135673	0.995911	0.000717487
AGAGAATTCGTTGTGA_1	0.0715045	0.0833225	0.222643	0.0421441	0.110279	0.0664614	0.0809448	0.3227
AGAGAGCCAAACCACT_1	0.0232896	0.04206	0.0216482	0.0335657	0.429338	0.168001	0.275099	0.00699841
AGAGAGCCACTCCTTG_1	0.0730846	0.6038	0.118193	0.0193481	0.123652	0.0494305	0.00524689	0.00724444
AGAGAGCCAGTAGTGG_1	0.0437417	0.14102	0.0482794	0.00352127	0.263292	0.0449474	0.43899	0.016208
AGAGAGCCATCTTAGG_1	0.048174	0.0315749	0.0191957	0.0667089	0.0180693	0.531735	0.00632224	0.27822
AGAGAGCTCCAGTACA_1	0.00630028	0.000504212	9.99428e-05	0.00096631	0.716136	0.000468384	0.00301005	0.272515
AGAGAGCTCCGGTTCT_1	0.950732	0.00253604	0.00011585	0.00181804	0.00106672	0.00639003	0.00247015	0.0348707
AGAGCAGAGCAGGTCA_1	0.00678927	0.253955	0.0869529	0.00333813	0.127113	0.334402	0.182817	0.00463141
AGAGCAGAGTCATTGC_1	0.000583202	8.17232e-05	0.000113481	4.5107e-05	0.0299673	0.000155129	0.969028	2.57475e-05
AGAGCAGGTGGTCTCG_1	0.120744	0.716835	0.0152932	0.004302	0.0125638	0.117635	0.00969271	0.00293419
AGAGCCCGTGTCTTAG_1	0.00851655	0.0376636	0.219214	0.00807158	0.31754	0.397588	0.0104077	0.000998339
AGATAGAAGATGAACT_1	0.971448	0.00124743	2.56476e-05	0.000183069	0.00048669	4.68554e-06	9.84802e-05	0.0265057
AGATAGACATACCATG_1	0.00495205	0.234792	0.105347	0.00602051	0.0724424	0.308317	0.264383	0.00374584
AGATAGAGTATGTCCA_1	0.16959	0.12189	0.119775	0.192591	0.23882	0.107515	0.021552	0.0282666
AGATCCAAGCACCGTC_1	0.0314893	0.140427	0.114987	0.0186319	0.433268	0.0850672	0.170216	0.00591374
AGATCCAGTCCGTTTC_1	0.00433887	0.00643983	0.170604	0.0574175	0.100559	0.637092	0.0167587	0.00678986
AGATCCATCAAGGCTT_1	0.00356761	0.00130938	0.00380644	0.000330773	0.00371697	0.964965	0.0201732	0.00213095
AGATCCATCAGCAATC_1	0.0225311	0.0518199	0.0419307	0.0267511	0.247253	0.0843453	0.190832	0.334537
AGATCGTTCCGCTAGG_1	0.0545915	0.0284351	0.0248552	0.829221	0.035348	0.0213037	0.00490522	0.00133986
AGATGAAAGTTGGCTT_1	0.05019	0.000936076	0.000745462	0.00291603	0.573507	0.00377632	0.00989228	0.358037
AGATGAAGTCCAGCAC_1	0.00431556	0.00557281	0.0181523	0.00170047	0.516393	0.396051	0.0556959	0.00211962
AGATGCTAGCATGTTC_1	0.297813	0.147537	0.105012	0.0175355	0.136536	0.219565	0.0565992	0.0194008
AGATGCTTCGGTCTGG_1	0.0150924	0.404211	0.490025	0.00732916	0.048419	0.023556	0.00654504	0.00482204
AGCCAATAGTGCGACA_1	0.0231461	0.0216389	0.0840579	0.00784412	0.581725	0.174086	0.0958842	0.0116186
AGCCAATCATTGAAGA_1	0.0116907	0.210904	0.476489	0.00358536	0.0238526	0.259582	0.00809789	0.00579875
AGCCACGAGAGTCCGA_1	0.00782332	0.0453895	0.582306	0.00108294	0.0289935	0.258151	0.0638101	0.0124434
AGCCACGCATATCTCT_1	0.00715299	0.0314079	0.253327	0.481066	0.19657	0.0231029	0.00402268	0.00334992
AGCCAGCAGATTCGCT_1	0.0959181	0.264077	0.0528041	0.0185596	0.205294	0.0748544	0.226874	0.0616185
AGCCAGCAGTACCGGA_1	0.00947893	0.0467112	0.0358121	0.000858066	0.00372667	0.900654	0.00232262	0.000436679
AGCCAGCTCTGTTCAT_1	0.0131227	0.183005	0.124384	0.0141015	0.291924	0.207503	0.158194	0.00776467
AGCGCCATCCAAGCTA_1	0.000744107	0.000442164	0.000775177	0.000749904	0.0420374	0.0010467	0.092141	0.862064
AGCGTATCAAATTGGA_1	0.0261247	0.0369006	0.0206017	0.00100729	0.0153384	0.882151	0.0162923	0.00158415
AGCGTATGTACTCCCT_1	0.0123308	0.207781	0.133675	0.00109978	0.00513436	0.634172	0.00498851	0.000818455
AGCGTATGTAGCCCTG_1	0.254832	0.268427	0.0956421	0.171557	0.105085	0.0654951	0.0330691	0.00589305
AGCGTATGTCCTGTTC_1	0.0107715	0.0327232	0.708408	0.000689028	0.0305671	0.213735	0.00240693	0.000699153
AGCTACAAGACAACAT_1	0.0197101	0.0620606	0.0319726	0.0321999	0.202657	0.574983	0.0696662	0.00675078
AGCTACAGTGGATTTC_1	0.657125	0.291684	0.0110007	0.015416	0.00870329	0.00831241	0.00222048	0.00553829
AGCTACATCTCCAAGA_1	0.0753143	0.878919	0.0166538	0.0010802	0.0113007	0.00720386	0.00615646	0.00337207
AGCTCAAAGTCTGCGC_1	0.00124484	0.00262665	0.0986399	0.0365067	0.69321	0.0296043	0.129797	0.00836974
AGCTCAATCACTGTCC_1	0.0733732	0.0215405	0.011287	0.00910263	0.739395	0.0592676	0.083769	0.00226465
AGCTCAATCGGTCATA_1	0.00585989	0.0295869	0.0443915	0.449579	0.232694	0.0836971	0.132187	0.0220052
AGCTTCCCATGGTGGA_1	0.024121	0.0592573	0.202477	0.164878	0.274537	0.0595843	0.208094	0.00705177
AGGAAATCACGTAGTT_1	0.0462687	0.55171	0.0634761	0.0500706	0.160803	0.0629453	0.0567838	0.00794189
AGGAAATGTAGCTTGT_1	0.111874	0.0547904	0.0476809	0.00661848	0.237945	0.468887	0.0390893	0.0331153
AGGAATAAGCTTTCCC_1	0.0384384	0.133663	0.0831065	0.0291412	0.39012	0.185826	0.118655	0.0210502
AGGAATACATGACAAA_1	0.152507	0.134314	0.119901	0.0238236	0.0983159	0.273991	0.155815	0.0413338
AGGACGAAGAAGTCCG_1	0.0164909	0.00286676	0.00303319	0.0246624	0.871575	0.0231574	0.032676	0.025538
AGGACGAGTGACAGCA_1	0.0509574	0.019971	0.0131399	0.0652904	0.813948	0.0184221	0.0129889	0.00528247
AGGACGAGTGGGCTCT_1	0.0115424	0.00973751	0.186348	0.00582862	0.375017	0.393847	0.0165685	0.00111085
AGGACTTAGTTCACTG_1	0.0202848	0.610271	0.244264	0.00424315	0.045592	0.0632588	0.00733872	0.00474764
AGGACTTGTTCTTCAT_1	0.0284741	0.0325388	0.124592	0.00526566	0.243993	0.507343	0.0539531	0.00384007
AGGACTTTCATCTATC_1	0.199406	0.770474	0.00473428	0.00619389	0.00658842	0.0067241	0.00299946	0.00288003
AGGAGGTCAAGGTCAG_1	0.00528701	0.0304083	0.0487514	0.316966	0.518114	0.0478636	0.0303395	0.00227049
AGGAGGTTCAAATAGG_1	0.0137922	0.0161541	0.0670337	0.0345253	0.698646	0.0769402	0.0689704	0.0239376
AGGATAAAGTGATCGG_1	0.113793	0.413466	0.105214	0.00895254	0.049912	0.0753761	0.0849499	0.148336
AGGATAACAATCCAGT_1	0.0147334	0.0121193	0.00843499	0.563204	0.289066	0.0602608	0.0476159	0.00456643
AGGATAACAATTCTCT_1	0.973146	0.00630138	0.000489342	0.00057362	0.00066399	0.0132072	0.000473493	0.00514533
AGGATAACAGGTTCGC_1	0.0375225	0.00807138	0.0235782	0.00297888	0.766317	0.02012	0.12404	0.0173724
AGGATCTTCACGACTA_1	0.00043531	0.00273682	0.0373741	0.00154256	0.0055484	0.951657	0.000617822	8.7668e-05
AGGCTGCAGGGAGGAC_1	0.0143121	0.0027996	0.294861	0.00420827	0.600757	0.0340052	0.0457817	0.00327522
AGGCTGCGTCACGCTG_1	0.860087	0.000467439	0.000455411	4.87141e-05	0.000135517	0.124924	0.000164783	0.0137178
AGGCTGCGTCGTCTCT_1	0.00113434	0.0199618	0.105976	0.000712745	0.248666	0.60081	0.0221748	0.000563851
AGGGCCTCAGTCAACT_1	0.025982	0.344729	0.334807	0.00402092	0.069424	0.209732	0.0079996	0.00330472
AGGGCCTGTTTACACG_1	0.00598586	0.0119633	0.44764	0.0174111	0.458224	0.0295756	0.0227123	0.00648806
AGGGCTCCAACGATTC_1	0.0286997	0.0172584	0.0290226	0.0659955	0.1289	0.691027	0.0317843	0.00731174
AGGGCTCCAGTTAAAG_1	0.0324361	0.0679277	0.32497	0.0254276	0.18862	0.237843	0.111251	0.0115238
AGGGTCCTCTTCTCAA_1	0.00235671	0.00387887	0.0140779	0.00452785	0.443453	0.0524003	0.395584	0.0837207
AGGGTGACAACGCCCA_1	0.00208667	0.00476656	0.00397617	0.558264	0.355768	0.00860796	0.0638412	0.00268876
AGGGTGACAGCATACT_1	0.285624	0.604528	0.0132587	0.00330333	0.00382591	0.0589912	0.00586376	0.0246055
AGGGTTTGTCGTATTG_1	0.00262505	0.0145648	0.00944567	0.0217314	0.722848	0.0353986	0.188952	0.0044344
AGGTAGGAGCATGGGT_1	0.157653	0.765475	0.0101353	0.0010467	0.00812768	0.0466611	0.00590715	0.004994
AGGTAGGAGTCACTCA_1	0.00823777	0.0289528	0.52926	0.101977	0.135467	0.126383	0.0614296	0.00829331
AGGTCATAGAGTCACG_1	0.0140313	0.0521008	0.1361	0.00377125	0.220599	0.556461	0.0150367	0.0018999
AGGTCATAGGGCCAAT_1	0.449919	0.0174262	0.0220037	0.0143699	0.280144	0.141703	0.0527907	0.0216441
AGGTCATGTGCCTACG_1	0.427832	0.551325	0.0032184	0.00252563	0.00441679	0.00331834	0.00292891	0.00443486
AGGTCATGTTGCATGT_1	0.0409943	0.0506272	0.222759	0.00319834	0.030179	0.592342	0.0455671	0.0143332
AGGTCTAGTCATTCCC_1	0.0322324	0.820242	0.0426662	0.00381218	0.00808107	0.0834455	0.00793743	0.00158327
AGGTGTTGTGGCTGAA_1	0.00970049	0.0175204	0.100047	0.0197176	0.0757812	0.723803	0.0501323	0.00329821
AGGTTACCAGTCTGGC_1	0.0416099	0.00244519	0.00207028	0.741372	0.167466	0.0155943	0.0135698	0.0158729
AGGTTACTCTATCGCC_1	0.00749075	0.00162032	0.00354098	0.00132747	0.848608	0.0458578	0.0736818	0.0178724
AGGTTGTGTCCATCTC_1	0.029208	0.0536002	0.112994	0.0167039	0.710449	0.0253785	0.0230802	0.0285863
AGTAACCAGCCACTCG_1	0.00739477	0.0137846	0.0204722	0.0296534	0.780526	0.0126899	0.124384	0.011095
AGTAACCAGTGAGCCA_1	0.179624	0.0260535	0.66551	0.00801441	0.0196907	0.0937903	0.00417414	0.00314372
AGTAACCTCCGTAATG_1	0.00229242	0.00440478	0.0127047	0.000283401	0.358893	0.0152669	0.509287	0.0968681
AGTACCACAGCTGGTC_1	0.00693317	0.0053856	0.00405664	0.852926	0.100025	0.0128441	0.00587275	0.011957
AGTACCACATGAAGGC_1	0.042088	0.0338623	0.390247	0.00318652	0.305721	0.123003	0.0768142	0.0250778
AGTACCATCATCTGTT_1	0.00550676	0.00448911	0.00869489	0.00582384	0.59052	0.0633087	0.133725	0.187932
AGTACTGAGAGAGTTT_1	0.011366	0.109295	0.131163	0.00115654	0.0251413	0.635756	0.0731921	0.0129295
AGTACTGAGATACATG_1	0.00301627	0.0254755	0.495979	0.0015157	0.325091	0.0612409	0.0760795	0.0116021
AGTACTGAGCGCCTTG_1	0.0333883	0.918344	0.0161591	0.00162923	0.0100547	0.00302039	0.00987779	0.0075263
AGTACTGTCGACGATT_1	0.00534371	0.0230188	0.100944	0.0186871	0.13291	0.666996	0.0372471	0.014854
AGTAGTCTCATAGGCT_1	0.00523742	0.0140176	0.0828272	0.0511384	0.750431	0.0174865	0.0660044	0.0128574
AGTCAACTCCGAGTGC_1	0.00470387	0.0293306	0.363779	0.0177173	0.485305	0.069707	0.0266484	0.00280921
AGTCACAAGACGGTCA_1	0.000256113	0.00118234	0.0183578	0.000387865	0.962226	0.0039965	0.0134327	0.000160796
AGTCACACAGTTCACA_1	0.0136471	0.174982	0.123654	0.0427502	0.403748	0.181613	0.0522993	0.00730634
AGTCACAGTGCAATAA_1	0.000210512	0.000669445	0.025384	0.00132824	0.00377102	0.967308	0.00100817	0.000320991
AGTCACATCCCAAGCG_1	0.0213001	0.203666	0.12557	0.101851	0.201532	0.286906	0.0552775	0.0038979
AGTCATGAGAGAGGGC_1	0.0365559	0.0396438	0.133928	0.00170342	0.0717349	0.712566	0.00315643	0.000710778
AGTCATGAGCGCCTTG_1	0.0165254	0.027246	0.171744	0.00713543	0.144564	0.626155	0.00605576	0.000573926
AGTCATGCAGACATCT_1	0.0132856	0.00861662	0.0570357	0.107072	0.610102	0.1188	0.0774342	0.00765398
AGTCATGGTTACGATC_1	0.012141	0.0980471	0.407163	0.01315	0.434714	0.0241378	0.00902777	0.00161926
AGTCTCCAGATGACAT_1	0.00749129	0.0541505	0.0875283	0.0056999	0.11529	0.637646	0.0890778	0.00311615
AGTCTCCAGCGCTTCG_1	0.0158826	0.0369849	0.329579	0.00235043	0.470093	0.071457	0.0620473	0.0116059
AGTCTCCGTCCTTAAG_1	0.00777692	0.0814544	0.303676	0.00118235	0.0249676	0.562965	0.0150537	0.00292465
AGTCTCCTCTCTGGTC_1	0.00748504	0.0125372	0.113754	0.00239005	0.757013	0.066154	0.0186839	0.0219825
AGTGACTAGCTAGAAT_1	0.00688712	0.0375831	0.150385	0.00389289	0.543166	0.184659	0.0708011	0.00262571
AGTGACTCACACGGTC_1	0.025319	0.0796554	0.0543598	0.00549223	0.276794	0.181472	0.330091	0.0468161
AGTGACTGTAGTCTTG_1	0.0653597	0.844407	0.0069378	0.020114	0.0179884	0.0302294	0.0111266	0.00383692
AGTGACTGTCCAGTTA_1	0.00201424	0.0104836	0.010856	0.00306042	0.00497902	0.925528	0.0413569	0.0017217
AGTGATCAGCAAGTGC_1	0.0309365	0.0751581	0.152636	0.00570285	0.440594	0.274507	0.0138235	0.0066422
AGTGATCAGTGTTCAC_1	0.0121795	0.00440192	0.065071	0.0256865	0.416793	0.0794415	0.380108	0.0163179
AGTGATCGTTTGAAAG_1	0.13798	0.0207419	0.00986444	0.0385201	0.620804	0.0221983	0.0950884	0.0548028
AGTGATCTCCGAACGC_1	0.00718832	0.00359222	0.00660576	0.258568	0.686843	0.0171751	0.0183898	0.001638
AGTGCCGAGGTGTGAC_1	0.00653944	0.0986541	0.351113	0.0227232	0.225706	0.1598	0.118216	0.0172471
AGTGCCGGTCAAGCCC_1	0.325168	0.229784	0.0152231	0.011488	0.209989	0.0364015	0.0860314	0.0859143
AGTGCCGTCGCTTGAA_1	0.125022	0.0138076	0.0210758	0.0264545	0.427875	0.0348546	0.17407	0.176841
AGTGTTGAGGGCAACT_1	0.299013	0.642766	0.0214093	0.00400487	0.0189467	0.00267359	0.00474696	0.00643967
AGTGTTGCACCATATG_1	0.0162196	0.128439	0.147792	0.00566553	0.148736	0.447438	0.101219	0.00449053
AGTTAGCGTCAGGTAG_1	0.0122092	0.233467	0.0231908	0.00136434	0.0249494	0.642299	0.0601692	0.00235009
AGTTCCCAGCATGTTC_1	0.0083749	0.0105789	0.00729142	0.0558596	0.776729	0.0167897	0.0798571	0.0445196
AGTTCCCGTTACTCAG_1	0.00802223	0.0246836	0.673306	0.00196161	0.12363	0.161896	0.00523845	0.00126224
AGTTCCCTCCATTTAC_1	0.0835238	0.0380968	0.00763978	0.190532	0.465093	0.0650132	0.113591	0.0365103
AGTTCGAAGAGTCAGC_1	0.00345174	0.00818111	0.0382741	0.00162274	0.0711454	0.405354	0.453487	0.0184836
AGTTCGACAGCAGATG_1	0.000749049	0.00512509	0.769609	0.00850906	0.0621493	0.149667	0.00351759	0.00067395
ATACCGACAAGTATAG_1	0.0213939	0.0118875	0.060698	0.0346588	0.356469	0.380641	0.115699	0.0185534
ATACCGACACGTTGGC_1	0.00553324	0.0267396	0.311284	0.016068	0.338625	0.228987	0.0697726	0.00298987
ATACCGAGTAGACACG_1	0.0010118	0.00328387	0.0425277	0.020805	0.532947	0.0361394	0.349397	0.0138885
ATACCGATCCACAAGT_1	0.00160315	0.00304856	0.0338139	0.796242	0.152587	0.0099969	0.00219448	0.000514935
ATACCTTAGCGGTATG_1	0.00509008	0.0330974	0.0746985	0.00133564	0.0881965	0.741569	0.0528979	0.00311486
ATACCTTTCCATATGG_1	0.0261183	0.00329962	0.000853754	7.35965e-05	0.000605705	0.966961	0.00196314	0.000124921
ATACTTCCACCGTCTT_1	0.00780266	0.0546913	0.0373352	0.112608	0.724705	0.0395333	0.0158588	0.00746647
ATACTTCCACGCCAGT_1	0.0420994	0.109965	0.054619	0.0535509	0.178001	0.455851	0.0908233	0.0150909
ATAGACCCACTTGGCG_1	0.00210277	0.0416654	0.312694	0.00474345	0.059684	0.565783	0.0119451	0.0013831
ATAGAGAAGAGTCTGG_1	0.0755285	0.253872	0.0248283	0.0228949	0.0417593	0.143482	0.0552734	0.382362
ATAGGCTGTTTAGTCG_1	0.00390808	0.02686	0.0744504	0.0358971	0.405484	0.373897	0.0707843	0.00871919
ATAGGCTTCATAGCAC_1	0.0231791	0.168492	0.0402722	0.185877	0.480186	0.0218622	0.0268804	0.053252
ATATCCTCAGAACATA_1	0.120125	0.0863345	0.016903	0.0660391	0.660997	0.00714148	0.0197961	0.0226642
ATATCCTGTGCGTCGT_1	0.0983835	0.0214382	0.00431248	0.0115887	0.160859	0.00542176	0.0253713	0.672625
ATATCCTTCGCCTAGG_1	0.0155189	0.144106	0.0173951	0.00729602	0.0124671	0.792066	0.01039	0.000760794
ATCACAGAGATAGTGT_1	0.0206642	0.00646004	0.00894777	0.0770515	0.197471	0.624842	0.0468013	0.0177626
ATCACAGAGGCAGTCA_1	0.00286543	0.0450538	0.500134	0.00661025	0.274683	0.157709	0.0120644	0.000879894
ATCACAGTCACTAGCA_1	0.147695	0.079115	0.0196985	0.111434	0.217355	0.0982288	0.300511	0.0259626
ATCACAGTCTGCTAGA_1	0.0306472	0.0121095	0.165572	0.132264	0.452778	0.168374	0.0265241	0.0117313
ATCACGAAGATTTGCC_1	0.017938	0.173857	0.411083	0.00814259	0.0787492	0.280133	0.0265141	0.0035835
ATCACGAGTATTGACC_1	0.00709951	0.0465235	0.00353654	0.839316	0.0725074	0.0194134	0.0104033	0.00119991
ATCACTTCAGCTTTCC_1	0.0302034	0.268854	0.0182643	0.0469478	0.07856	0.414322	0.134238	0.00861075
ATCACTTTCAGTCACA_1	0.0602186	0.0311733	0.00976129	0.169944	0.612939	0.0350587	0.0689751	0.0119294
ATCAGGTCAACACGAG_1	0.000611081	0.0209519	0.0931201	0.00327054	0.807419	0.0153027	0.0584113	0.000913488
ATCAGGTCAACGACTT_1	0.00410009	0.0560717	0.0795143	0.00557877	0.330274	0.326562	0.195657	0.00224171
ATCAGGTGTAACATGA_1	0.000655551	0.0305279	0.113569	0.00688636	0.774244	0.0634644	0.00931886	0.00133314
ATCAGGTGTGGAAATT_1	0.625829	0.0306778	0.0124283	0.0165822	0.217875	0.0522402	0.0234176	0.0209491
ATCAGGTTCTGTCTCG_1	0.0282391	0.0872644	0.157557	0.0173472	0.118532	0.0951196	0.0867824	0.409158
ATCATTCCACTATCCC_1	0.104421	0.053031	0.100169	0.0608903	0.592843	0.0100859	0.0473819	0.0311777
ATCATTCTCCTACGAA_1	0.00199482	0.00435612	0.00678771	0.0207716	0.758962	0.0972861	0.0755551	0.0342869
ATCCACCAGGGACAGG_1	0.000660607	0.00273487	0.128407	0.00194587	0.0730398	0.774671	0.0164874	0.00205344
ATCCACCCACCGCTGA_1	0.0896553	0.0174957	0.0248845	0.27567	0.388749	0.117485	0.0502604	0.0357999
ATCCACCCATTGACCA_1	0.00325833	0.00223283	0.00198065	0.000477582	0.00413323	0.974302	0.00321624	0.0103991
ATCCACCGTTCGTAAC_1	0.00473283	0.00257478	0.0162852	0.00271914	0.569061	0.230406	0.171831	0.00238914
ATCCATTTCACTTATC_1	0.0799489	0.266863	0.0357655	0.00593398	0.0511448	0.247835	0.276425	0.0360841
ATCCCTGAGGCCTTCG_1	0.038552	0.0533364	0.0787664	0.00461023	0.119728	0.612646	0.0756676	0.0166939
ATCCCTGCAAAGACGC_1	0.0112926	0.755821	0.11053	0.00150603	0.0516655	0.0535095	0.013697	0.00197859
ATCCCTGCACAGCGCT_1	0.257721	0.579962	0.03559	0.0159048	0.0238953	0.0193471	0.006634	0.0609451
ATCCCTGGTAACGTTC_1	0.00692551	0.0494131	0.33729	0.00089965	0.06939	0.382631	0.138265	0.0151856
ATCCGTCCAGTATGAA_1	0.00328644	0.023917	0.0544703	0.00919428	0.766766	0.10539	0.0362834	0.000693062
ATCCTATGTACCAATC_1	0.0299128	0.126446	0.113949	0.0188166	0.0314259	0.558058	0.04066	0.0807316
ATCCTATGTGACACAG_1	0.0312635	0.0421393	0.492498	0.00755161	0.14552	0.253141	0.0152552	0.0126324
ATCGATGTCGCTCCTA_1	0.345863	0.0262601	0.0140185	0.252025	0.180285	0.068549	0.0496507	0.0633484
ATCGCCTAGCCGCACT_1	0.026282	0.204353	0.457461	0.0899729	0.148018	0.0586805	0.0102781	0.00495421
ATCGCCTAGCGTGAAC_1	0.00570742	0.0179634	0.0151117	0.00272521	0.172893	0.493279	0.285985	0.00633559
ATCGCCTCACAGACGA_1	0.028488	0.819651	0.0257252	0.0725411	0.0205566	0.011103	0.0117179	0.0102173
ATCGCCTTCCATGCAA_1	0.00200412	0.0102984	0.161166	0.00303011	0.163644	0.562107	0.0962035	0.00154735
ATCGGATAGAAGTGTT_1	0.0252375	0.705348	0.165208	0.00067017	0.0178246	0.0533274	0.028875	0.00350881
ATCGGATCAGTCAACT_1	0.00972408	0.0412222	0.147097	0.0013737	0.0509563	0.68634	0.0617646	0.00152156
ATCGGATTCGGCCAAC_1	0.122353	0.130876	0.38984	0.0830037	0.16224	0.0908993	0.0132065	0.00758091
ATCGTAGCACGTCGGT_1	0.0104228	0.0233825	0.0323982	0.020411	0.773806	0.110803	0.0270994	0.00167801
ATCGTCCGTGCGACAA_1	0.00505853	0.0155795	0.259517	0.00360283	0.533988	0.154978	0.0234183	0.00385765
ATCGTGACAAGATGTA_1	0.00789336	0.0537173	0.0947569	0.00792305	0.0425964	0.429899	0.237648	0.125566
ATCGTGAGTAACGCGA_1	0.00411989	0.0104558	0.0538605	0.0629593	0.767618	0.0735048	0.0257909	0.00169114
ATCGTGATCATTGGTG_1	0.993534	0.00177878	3.27424e-05	0.000370886	6.74935e-05	6.09238e-05	3.7176e-05	0.00411849
ATCGTGATCCGCATAA_1	0.00207249	0.00435649	0.227306	0.0328755	0.207689	0.446325	0.0779917	0.00138338
ATCGTGATCGACGAGA_1	0.00405902	0.844459	0.0115608	0.000829008	0.00463952	0.0191422	0.0320046	0.0833058
ATCGTGATCTCCTGCA_1	0.0292725	0.0725685	0.0191378	0.0100519	0.0378834	0.0444972	0.0459229	0.740666
ATCGTGATCTGAGGCC_1	0.00122661	0.00051567	0.000588701	0.00393439	0.0391066	0.000655143	0.00114077	0.952832
ATCTCTAAGATGCTTC_1	0.00147837	0.00795769	0.787582	0.00109343	0.132542	0.04753	0.0157816	0.00603532
ATCTCTATCGCTGTTC_1	0.000809932	0.00255957	0.0200748	0.137644	0.748113	0.0285033	0.0509886	0.0113072
ATGAAAGGTAGCTCGC_1	0.00861042	0.0229635	0.491977	0.00455591	0.203637	0.255581	0.0111709	0.00150495
ATGAAAGGTTCGTTCC_1	0.0494512	0.0335285	0.163334	0.0504568	0.31381	0.14793	0.0775594	0.16393
ATGAAAGTCCATTTAC_1	0.00496667	0.0025601	0.979029	0.000248797	0.00530715	0.00250448	0.00158596	0.00379783
ATGACCATCAGGACAG_1	0.0533991	0.0648489	0.137188	0.0420199	0.661946	0.0284679	0.00902319	0.00310752
ATGAGGGCAAGCGCTC_1	0.0559423	0.453815	0.0222699	0.113139	0.1006	0.0395158	0.199049	0.0156692
ATGAGGGGTGACTGTT_1	0.172175	0.0334429	0.0127138	0.0218893	0.483059	0.0566309	0.212929	0.0071594
ATGATCGAGCTGTCCG_1	0.0438048	0.068931	0.344556	0.00665594	0.104295	0.202973	0.223693	0.00509129
ATGATCGCAAATGATG_1	0.00254269	0.0156144	0.605773	0.000733493	0.023194	0.330618	0.0200119	0.00151215
ATGATCGGTCAAGTTC_1	0.000903417	0.0501612	0.548811	0.00229523	0.298256	0.0798534	0.0191214	0.000599116
ATGATCGTCCGACATA_1	0.0486996	0.0635045	0.675105	0.00352666	0.0948529	0.0901075	0.0196478	0.00455604
ATGCATGCATTAGGCT_1	0.0323742	0.0416609	0.0824631	0.0136337	0.165502	0.381061	0.184761	0.0985437
ATGCATGGTCAGGAGT_1	0.0030661	0.0156079	0.00859518	0.0414754	0.396119	0.033422	0.498077	0.00363808
ATGCCTCCACCTCGTT_1	0.0252589	0.0198449	0.0193245	0.0855629	0.281236	0.0670204	0.398194	0.103558
ATGCCTCGTTATGTCG_1	0.0649386	0.0467357	0.144284	0.110357	0.11911	0.458917	0.0508899	0.00476768
ATGCCTCTCTTCCCAG_1	0.0260111	0.0852652	0.215849	0.00124417	0.351734	0.301356	0.0148317	0.00370882
ATGCGATAGTCCCGAC_1	0.219227	0.651515	0.0165693	0.00821922	0.049688	0.00696734	0.0229184	0.0248955
ATGCGATCAGGTCCCA_1	0.0392673	0.0619442	0.284654	0.00450461	0.0949436	0.448277	0.0331062	0.0333026
ATGGAGGGTATTGACC_1	0.244644	0.0774141	0.0520538	0.00996176	0.119351	0.241851	0.10424	0.150484
ATGGATCTCGAGATGG_1	0.0181766	0.00980725	0.0157068	0.00410859	0.165318	0.19373	0.250133	0.34302
ATGGATCTCTCTCGAC_1	0.0164695	0.194476	0.46074	0.00672829	0.299947	0.00867368	0.00811907	0.00484634
ATGGGAGGTGGGTTGA_1	0.818619	0.116315	0.00163226	0.00113027	0.0078417	0.0276574	0.00257097	0.0242326
ATGGGTTAGCTGAAGC_1	0.0214823	0.451419	0.459044	0.0019007	0.0278048	0.0316266	0.0049737	0.00174859
ATGGGTTAGTCTGTAC_1	0.329363	0.0555825	0.0486659	0.0463319	0.393449	0.0591198	0.0305742	0.0369141
ATGGGTTCAGTCCGTG_1	0.102554	0.7447	0.0144347	0.0032338	0.0203067	0.0661209	0.0428637	0.00578609
ATGGGTTCATAGGTTC_1	0.0262452	0.105279	0.399761	0.06705	0.355331	0.0147317	0.0244874	0.00711615
ATGGTTGGTCCAGCAC_1	0.0127386	0.348169	0.0736669	0.0245741	0.190557	0.151915	0.192256	0.0061237
ATGGTTGGTGGATCAG_1	0.00899701	0.138354	0.749537	0.000838905	0.0349903	0.0553722	0.0090987	0.0028113
ATGTCCCTCGTAGCCG_1	0.188004	0.649808	0.0103431	0.00888934	0.0256939	0.0891085	0.0247726	0.0033803
ATGTCTTAGGAGAGTA_1	0.0141561	0.0162694	0.0871035	0.0133614	0.64931	0.119726	0.0614772	0.0385965
ATGTCTTGTAGACGTG_1	0.00123397	0.988641	0.00176578	0.00130448	0.000973476	0.00156624	0.00126614	0.00324852
ATGTCTTGTAGGCTCC_1	0.0033268	0.00931547	0.112828	0.00787109	0.827354	0.0200592	0.0161632	0.00308219
ATTACTCGTCCCGTGA_1	0.0138616	0.0501874	0.631964	0.0122841	0.171879	0.102173	0.0137745	0.00387567
ATTACTCGTTGGGTTT_1	0.0172563	0.0423544	0.340987	0.0399471	0.335736	0.165386	0.019228	0.039106
ATTACTCTCCTAGAGT_1	0.011772	0.00450778	0.00553009	0.174853	0.767211	0.00348368	0.0238659	0.00877712
ATTACTCTCGACATCA_1	0.0177449	0.0311383	0.467357	0.00388346	0.313357	0.116832	0.0365914	0.0130962
ATTATCCAGCGAAACC_1	0.0159355	0.0243051	0.128881	0.0101975	0.542536	0.225164	0.0436165	0.00936428
ATTATCCGTGTGTGTT_1	0.0105899	0.31704	0.187002	0.0139115	0.11167	0.217379	0.126026	0.0163823
ATTATCCGTTATGACC_1	0.0297646	0.234025	0.0653573	0.00489635	0.0496728	0.145313	0.457846	0.0131256
ATTATCCGTTCGTACA_1	0.00758945	0.0453514	0.797868	0.0015097	0.0673274	0.0675959	0.00887839	0.00388026
ATTCAGGGTCGTGGAA_1	0.0152532	0.144845	0.456416	0.00629614	0.137252	0.207387	0.0229555	0.00959557
ATTCAGGGTTAAACAG_1	0.0226933	0.292214	0.361679	0.00570599	0.0182523	0.286247	0.0109699	0.00223837
ATTCAGGTCCACCTCA_1	0.0149348	0.183829	0.243574	0.0259248	0.0492743	0.430396	0.0431403	0.00892683
ATTCATCGTTAGAAAC_1	0.0141208	0.0308417	0.302984	0.00328711	0.466492	0.164844	0.015013	0.00241744
ATTCATCGTTATAGCC_1	0.0323267	0.0793536	0.111181	0.0254695	0.37917	0.207234	0.158596	0.00666972
ATTCCATAGGGATCGT_1	0.0135973	0.0184227	0.0622537	0.37069	0.494019	0.0235513	0.00735054	0.0101153
ATTCCATCATGTCAGT_1	0.0291102	0.0345383	0.242691	0.0360208	0.588444	0.0271571	0.038146	0.0038927
ATTCCATGTCATCACA_1	0.0117506	0.0387097	0.0388947	0.0184244	0.661897	0.130397	0.0894419	0.0104846
ATTCCATGTCTTCAAG_1	0.00384192	0.00511105	0.00815003	0.0515698	0.389518	0.394557	0.143592	0.00365982
ATTCCATTCCACCTGT_1	0.0233588	0.208386	0.0672557	0.0430736	0.287956	0.257203	0.095355	0.0174116
ATTCCCGAGGTGGTTG_1	0.0634536	0.192452	0.0175212	0.0235607	0.31044	0.156822	0.156115	0.0796357
ATTCCTAGTAGTATAG_1	0.0236625	0.518945	0.0777298	0.290423	0.0603806	0.0192637	0.00619226	0.00340267
ATTCCTATCTACGCAA_1	0.0227489	0.125111	0.109368	0.399675	0.22892	0.0934221	0.0145114	0.00624363
ATTCGTTAGATAGCAT_1	0.00279591	0.0234009	0.0940696	0.00376219	0.0509075	0.790377	0.0323734	0.00231348
ATTCGTTCAACGAGGT_1	0.0312815	0.0528881	0.0604189	0.370798	0.425517	0.032464	0.0202753	0.00635648
ATTCGTTCACCAAAGG_1	0.0172717	0.0267254	0.0636428	0.247911	0.51034	0.0974483	0.022904	0.0137565
ATTCGTTTCATCCTGC_1	0.011781	0.0212978	0.274487	0.0330617	0.576077	0.062545	0.0166769	0.00407441
ATTCTACCAATGCAAA_1	0.0116945	0.0151906	0.00561582	0.0251194	0.727445	0.03799	0.168772	0.00817327
ATTCTACTCGTCACCT_1	0.0107121	0.00592795	0.00199693	0.841424	0.114722	0.00617165	0.00818317	0.0108619
ATTCTTGCATGCCATA_1	0.0226476	0.287917	0.172922	0.0127158	0.196542	0.180156	0.0794216	0.0476777
ATTCTTGGTCCAAAGG_1	0.00399722	0.00950268	0.0332196	0.00200353	0.00733833	0.786023	0.034085	0.123831
ATTCTTGTCCACTGAA_1	0.0535652	0.0389202	0.0084162	0.0327873	0.638986	0.0135933	0.209007	0.00472453
ATTCTTGTCTACACTT_1	0.0387597	0.17276	0.153261	0.0210287	0.32206	0.24615	0.0438502	0.00213087
ATTGGGTCAAGGTTGG_1	0.00774843	0.0224436	0.0779543	0.147225	0.610338	0.0586712	0.0699607	0.00565846
ATTGGGTCATGGACAG_1	0.0441367	0.0132607	0.0105342	0.0526827	0.652036	0.172233	0.0446254	0.0104915
ATTGGGTTCCCTTCCC_1	0.0335374	0.37582	0.107305	0.0550212	0.256767	0.0584602	0.1001	0.0129891
ATTGTTCCAGCGTGAA_1	0.0308193	0.0321828	0.250635	0.104941	0.291086	0.214579	0.0125883	0.0631681
ATTGTTCGTATATGGA_1	0.0186482	0.0388285	0.00976841	0.10129	0.736827	0.0149023	0.0230109	0.0567239
ATTGTTCGTGTTCCAA_1	0.481954	0.389786	0.0100489	0.00346467	0.00933531	0.0513091	0.0454196	0.00868242
ATTTACCCACCTGAAT_1	0.0171109	0.0413129	0.074666	0.0539068	0.416308	0.326829	0.066803	0.00306283
ATTTACCCAGCCGTTG_1	0.00248591	0.0112481	0.183863	0.00695257	0.629567	0.129367	0.0344491	0.0020666
ATTTACCCAGGTTTAC_1	0.0173829	0.0196861	0.037897	0.00746755	0.439625	0.126776	0.277141	0.0740241
ATTTACCCATCAGCAT_1	0.360768	0.624911	0.00122497	0.000199029	0.000780785	0.00651982	0.00221217	0.00338435
ATTTACCGTGGACCAA_1	0.0129677	0.066996	0.262268	0.01019	0.471943	0.106003	0.0654932	0.00413943
ATTTACCTCCATAGGT_1	0.0289248	0.0278139	0.470409	0.0321207	0.341437	0.0841916	0.0105711	0.00453182
ATTTCACAGGAGTCTG_1	0.0382411	0.0268249	0.128119	0.0609208	0.62679	0.0151462	0.0644464	0.0395116
ATTTCTGCACTAGTAC_1	0.0122153	0.118886	0.420015	0.0689138	0.0851465	0.270317	0.016335	0.00817146
ATTTCTGGTCCGGACT_1	0.0237333	0.776335	0.0512444	0.011535	0.0498076	0.0148223	0.0686639	0.00385797
CAAAGAAGTATGCTAC_1	0.00381024	0.116943	0.151016	0.00403203	0.337322	0.286055	0.097819	0.00300238
CAACAACTCTTTCCGG_1	0.0411738	0.187177	0.582631	0.0295005	0.0623332	0.0863199	0.00630233	0.00456195
CAACAGTGTTAGGGAC_1	0.373912	0.608693	0.00318413	0.000405901	0.00237771	0.00790996	0.00230547	0.00121179
CAACAGTTCACGAGGA_1	0.0187538	0.264189	0.105198	0.0140329	0.213826	0.213195	0.160666	0.0101386
CAACGATCATGGCCAC_1	0.0236692	0.789275	0.0476005	0.000661643	0.0232758	0.0656988	0.0415024	0.00831675
CAACGATTCGATTCCC_1	0.00635013	0.0119627	0.0970611	0.00425664	0.385555	0.430278	0.0570432	0.00749313
CAACGGCTCGCTAATG_1	0.234048	0.186748	0.0111621	0.00395281	0.0772251	0.365092	0.0489587	0.0728134
CAACGGCTCTCACTCG_1	0.0268431	0.0869526	0.705343	0.0172932	0.0866109	0.0738845	0.00129314	0.00177949
CAAGACTCAGAATCGG_1	0.00136022	0.00166004	0.0590775	0.000852794	0.234123	0.1933	0.50607	0.00355625
CAAGAGGGTTACACTG_1	0.0125098	0.0694534	0.0324563	0.0035297	0.165908	0.345896	0.354588	0.0156591
CAAGCTACACCGTGCA_1	0.257111	0.0444511	0.0770347	0.0666509	0.149549	0.291654	0.10603	0.00751898
CAAGCTATCTCATTAC_1	0.00460154	0.0214497	0.00725318	0.0316792	0.791221	0.011413	0.129436	0.00294674
CAAGGGACACTCCTTG_1	0.00168544	0.000591715	0.000620124	0.00114195	0.358379	0.000738784	0.0313525	0.605491
CAATACGAGAAGATCT_1	0.03667	0.053166	0.0414367	0.00442488	0.0269634	0.764656	0.0298639	0.0428191
CAATACGCAATAAGGT_1	0.00359975	0.0084007	0.0149256	0.432927	0.516423	0.0143914	0.00732709	0.00200525
CAATACGTCATGACAC_1	0.0246005	0.00214676	0.00628332	0.00683286	0.0948487	0.00371792	0.164394	0.697176
CAATACGTCCTACTGC_1	0.399993	0.586037	0.00101645	0.000287328	0.000789197	0.00627034	0.00125741	0.00434896
CAATACGTCCTGGGAC_1	0.115547	0.0242267	0.00587487	0.692305	0.0748859	0.0191193	0.0581529	0.0098876
CAATCGAAGAATACAC_1	0.00270036	0.0185977	0.1405	0.00661777	0.533886	0.0674431	0.222953	0.00730255
CAATGACAGAATCGAT_1	0.00311198	0.0537196	0.291953	0.00116087	0.0685802	0.547033	0.0330842	0.00135746
CAATGACCAGCGTATT_1	0.00469928	0.0113113	0.11266	0.00216186	0.0916208	0.647261	0.115959	0.0143259
CAATGACTCAGTGTGT_1	0.027377	0.0131131	0.00458278	0.00259547	0.763954	0.0211196	0.147089	0.0201683
CAATTTCAGCGCCTCA_1	0.0278096	0.124785	0.102389	0.465898	0.140646	0.0794637	0.0383509	0.0206585
CAATTTCTCATTTACC_1	0.0290081	0.0205438	0.014992	0.0446924	0.808759	0.0280281	0.0176536	0.0363228
CACAACACACACGTGC_1	0.0533268	0.0558448	0.108777	0.0540824	0.428542	0.217292	0.0755546	0.00658154
CACAACATCGGTCAGC_1	0.00790569	0.00381838	0.0134672	0.0143209	0.150733	0.0403626	0.163139	0.606254
CACACAAAGCGCACAA_1	0.00747826	0.0588123	0.094118	0.401744	0.352767	0.0682533	0.014994	0.00183384
CACACAACAATTGCCA_1	0.00839346	0.0134042	0.910306	0.00169185	0.0262505	0.0364161	0.00267594	0.00086219
CACACAACAGTTAGGG_1	0.0175013	0.0129176	0.0128731	0.740023	0.172153	0.0164325	0.0237042	0.00439566
CACAGATAGAGAGGTA_1	0.486162	0.399266	0.00864449	0.0013929	0.00320485	0.0216965	0.00801948	0.0716143
CACAGATAGTGTACAA_1	0.00548012	0.0297034	0.316457	0.0548545	0.44923	0.112502	0.0217513	0.0100212
CACAGATCAGGATCTT_1	0.0743641	0.674365	0.0586148	0.0400443	0.119793	0.0136899	0.00750493	0.011624
CACAGATCAGGTGTGA_1	0.273007	0.257756	0.0298246	0.0229208	0.0527133	0.328372	0.0207626	0.0146444
CACAGATCATCATGAC_1	0.0420069	0.955597	0.00037775	4.55619e-05	0.000114125	0.00050165	0.000167773	0.00118969
CACAGGCCAGAGTTCT_1	0.0124054	0.0328917	0.178061	0.00340655	0.0653719	0.419774	0.277963	0.0101266
CACAGGCGTGGATGAC_1	0.0236756	0.0154435	0.0343649	0.0307231	0.12349	0.732504	0.0347188	0.00507975
CACAGGCTCTGGACCG_1	0.00586853	0.0234225	0.0291586	0.00481323	0.214821	0.583512	0.134839	0.00356456
CACATGACATGACGTT_1	0.0908058	0.138486	0.208366	0.0885913	0.235267	0.220712	0.0143703	0.00340189
CACATGAGTCTGCGCA_1	0.0363084	0.0188787	0.0312404	0.00808097	0.114811	0.525289	0.236299	0.0290918
CACCAAAAGCCAGACA_1	0.0258475	0.810027	0.0946504	0.00212624	0.0298437	0.011495	0.0171375	0.00887247
CACCGTTAGGGAGTGG_1	0.0443264	0.246142	0.129738	0.0200422	0.214756	0.302275	0.0415844	0.00113638
CACCGTTAGTGTACAA_1	0.0342271	0.449269	0.132847	0.0286027	0.226935	0.0678602	0.0421382	0.0181215
CACCGTTCAATTGCTG_1	0.0858805	0.266365	0.239302	0.0078116	0.333261	0.0547406	0.00715794	0.00548154
CACCGTTTCAGCCTCT_1	0.0103885	0.00894478	0.00251664	0.25946	0.669701	0.0137448	0.0155056	0.0197386
CACGAATAGGAGACCT_1	0.0723682	0.022177	0.037295	0.52393	0.0826401	0.20718	0.0347135	0.0196968
CACGAATGTGTGTGTT_1	0.140955	0.242945	0.104763	0.0235299	0.224217	0.203815	0.0517143	0.00806078
CACGAATGTTTGACAC_1	0.00742621	0.846086	0.103743	0.00334397	0.0161662	0.0124454	0.00562717	0.00516159
CACGTGGAGGGACAGG_1	0.0141595	0.0354429	0.220735	0.00953681	0.213611	0.281008	0.214407	0.0111004
CACGTGGTCGCCAACG_1	0.00263301	0.00423574	0.211076	0.00274483	0.417858	0.277059	0.0770893	0.00730486
CACGTTCAGAGTCTGG_1	0.0125777	0.0138805	0.0331276	0.00188394	0.0118216	0.922104	0.00241236	0.00219251
CACGTTCAGCGCAATG_1	0.000641052	0.000658711	0.000713237	0.835503	0.155568	0.00135517	0.00533576	0.000224351
CACGTTCGTCATCGCG_1	0.00416864	0.159071	0.738455	0.000894626	0.0536539	0.029686	0.0101796	0.0038907
CACGTTCGTCTATGAC_1	0.00684769	0.562608	0.315824	0.011949	0.028526	0.036601	0.0328986	0.00474543
CACGTTCGTGCATACT_1	0.00614531	0.0771098	0.337732	0.0846754	0.441143	0.0404244	0.0102469	0.0025233
CACTAAGGTGTGAGCA_1	0.00304594	0.111803	0.728777	0.00663829	0.110875	0.032879	0.00438803	0.00159301
CACTGAAAGCTCGAAG_1	0.0157113	0.0152671	0.0293212	0.00491297	0.564276	0.183996	0.184156	0.00235968
CACTGAACAGTAACGG_1	0.0325945	0.476574	0.304592	0.0325591	0.097307	0.0264833	0.0243539	0.00553626
CACTGAATCATCTATC_1	0.00905652	0.0149656	0.0718004	0.33258	0.341957	0.182147	0.043469	0.00402409
CACTGGGGTTCAGCGC_1	0.386208	0.368231	0.011321	0.00550537	0.0168327	0.111054	0.0603412	0.0405065
CACTGTCCAGAGGTAC_1	0.249342	0.0481859	0.0178074	0.159779	0.04477	0.0156466	0.00845221	0.456017
CACTGTCGTCTTAGTG_1	0.000874596	0.0281924	0.616636	0.000655365	0.112538	0.225712	0.0146442	0.000747344
CACTGTCGTTCGAAGG_1	0.391972	0.01131	0.162459	0.00173677	0.018647	0.386848	0.0187718	0.00825557
CACTTCGGTAGTCTTG_1	0.00411781	0.0435133	0.157967	0.0045013	0.0409993	0.734385	0.0126646	0.00185168
CAGAGCCCAATACCCA_1	0.00968939	0.0102725	0.0487306	0.163909	0.562419	0.151165	0.0497774	0.00403733
CAGAGCCCACTGGACC_1	0.00125355	0.00429024	0.496026	0.0907199	0.191741	0.206605	0.00692853	0.00243579
CAGAGCCGTGAATAAC_1	0.11414	0.0319848	0.00603339	0.397478	0.276021	0.0212029	0.0425847	0.110555
CAGAGCCGTGGCTGAA_1	0.013483	0.0925936	0.358937	0.031526	0.176186	0.305844	0.017225	0.00420494
CAGATACCAAACGTGG_1	0.909825	0.000738848	4.16715e-05	0.000425717	0.000123581	1.74499e-05	0.0002554	0.0885728
CAGATACGTGACTGAG_1	0.0159097	0.04384	0.114117	0.0791127	0.714736	0.00820171	0.0163414	0.00774121
CAGATCAAGAGGCGGA_1	0.0926435	0.348155	0.0486822	0.00318129	0.0138424	0.387485	0.0403785	0.0656328
CAGATCACAACAAGAT_1	0.003839	0.0144889	0.124955	0.0827056	0.0281375	0.721034	0.0146446	0.0101955
CAGATCATCTGACAGT_1	0.00215892	0.00991751	0.0350993	0.192784	0.676185	0.0517964	0.0300356	0.00202326
CAGATTGCAAATAAGC_1	0.0322342	0.478244	0.094436	0.0352636	0.19163	0.102396	0.0468947	0.0189018
CAGATTGGTCTCAGAT_1	0.155302	0.11861	0.196646	0.044545	0.116333	0.106985	0.186037	0.0755416
CAGCAATAGACCCGCT_1	0.206916	0.634501	0.02718	0.0493867	0.0387609	0.00366094	0.0164299	0.0231648
CAGCAATGTACATACC_1	0.00819937	0.0122894	0.0630066	0.0797936	0.220344	0.45849	0.151791	0.00608613
CAGCAATTCATACGGT_1	0.0473026	0.890638	0.00689415	0.00281267	0.00715194	0.00849561	0.0325083	0.00419646
CAGCAATTCCACATAG_1	0.181273	0.143723	0.411698	0.0259098	0.0664631	0.150659	0.0156107	0.00466353
CAGCAATTCTAGTGTG_1	0.00255734	0.00437874	0.00528026	0.400479	0.468545	0.068257	0.0493699	0.00113251
CAGCACGGTCGAGTTT_1	0.00594479	0.0421907	0.0289444	0.00519141	0.369818	0.255604	0.282879	0.00942793
CAGCACGTCGCTCATC_1	0.173169	0.801955	0.00229144	0.00318391	0.00203013	0.00528482	0.00494456	0.0071411
CAGCAGCGTAGAGCTG_1	0.0155278	0.0794122	0.092996	0.00241986	0.0106962	0.675459	0.103124	0.0203651
CAGCCAGAGCTCCACG_1	0.00549142	0.0272451	0.324398	0.0217031	0.470825	0.121441	0.0258411	0.00305416
CAGCCAGCACACGGAA_1	0.0150339	0.0139643	0.147776	0.0467613	0.443063	0.272187	0.0518461	0.00936824
CAGCCAGCATCGAACT_1	0.00742493	0.00865434	0.00460948	0.0265941	0.918873	0.0113111	0.0193077	0.00322569
CAGCCAGGTTTGAAAG_1	0.11556	0.148698	0.0447832	0.00501657	0.227877	0.39726	0.0399993	0.0208063
CAGCCAGTCGGCATTA_1	0.0251961	0.0398023	0.0120078	0.006947	0.467489	0.145664	0.281515	0.0213785
CAGCCAGTCGTAACCA_1	0.00427559	0.0172008	0.129768	0.0496511	0.437897	0.323637	0.0360124	0.00155845
CAGCGTGGTCGGTACC_1	0.0469307	0.583994	0.100439	0.0307554	0.13992	0.0775942	0.0184383	0.00192783
CAGCGTGGTCTTAGTG_1	0.912907	0.071819	0.00299246	0.00247125	0.00242196	0.00399124	0.00208745	0.00130968
CAGCGTGGTGATAGAT_1	0.0317024	0.014899	0.010232	0.009201	0.213605	0.0516172	0.638546	0.0301981
CAGCGTGTCCGGCAGT_1	0.0429054	0.758385	0.034536	0.00177558	0.0138849	0.0580277	0.0883199	0.00216571
CAGCGTGTCTTCGCTG_1	0.00964124	0.0453809	0.125578	0.0092455	0.293135	0.118854	0.396315	0.00185
CAGGCCACACACTTAG_1	0.0123886	0.0560497	0.146215	0.188047	0.274572	0.0869332	0.228962	0.00683266
CAGGCCAGTCTTTCAT_1	0.00175169	0.274658	0.64208	0.000297846	0.0389781	0.0312261	0.0104815	0.000527071
CAGGGCTAGTCAGGGT_1	0.00500936	0.0164304	0.415753	0.00510759	0.0590111	0.332354	0.154912	0.011423
CAGTGCGCATGAATCC_1	0.0293349	0.016236	0.0356381	0.73458	0.116922	0.0179543	0.0257188	0.0236152
CAGTGCGTCGGATACT_1	0.00209522	0.00244564	0.00783302	0.0287737	0.330702	0.0788027	0.536353	0.0129942
CAGTGCGTCTGTTCAT_1	0.0334351	0.344853	0.22692	0.00287526	0.19524	0.166423	0.0243907	0.00586291
CAGTTAGCAGCCCACA_1	0.0773555	0.0170383	0.0263839	0.0869476	0.50575	0.0322811	0.232765	0.0214784
CAGTTAGGTACGATTC_1	0.831212	0.0898186	0.0121399	0.0460658	0.0124366	0.00363846	0.00273637	0.00195252
CAGTTAGGTTCGTGCG_1	0.00214658	0.00473837	0.74647	0.00161549	0.0658681	0.168247	0.00886461	0.00204964
CAGTTAGTCCGAAATC_1	0.00161287	0.0459042	0.915368	0.000465785	0.0338084	0.00180347	0.000762607	0.000274517
CAGTTAGTCGACGAGA_1	0.0176984	0.0028085	0.00698524	0.00271329	0.219478	0.00469482	0.666684	0.078938
CAGTTCCAGAAGCGGG_1	0.0111971	0.0271662	0.0652834	0.00164295	0.818856	0.0157171	0.0553026	0.00483412
CAGTTCCAGACGCTCC_1	0.0184029	0.249175	0.392898	0.00160844	0.046121	0.275791	0.0122021	0.00380204
CAGTTCCGTGTGTCCG_1	0.320065	0.128527	0.12099	0.00893873	0.180152	0.150024	0.075	0.0163039
CAGTTCCTCTACCACC_1	0.0024284	0.00622355	0.0191008	0.00218409	0.586318	0.241389	0.133202	0.00915384
CATAAGCCAAGCGGAT_1	0.000442144	0.00372426	0.732518	0.000669419	0.122408	0.129755	0.0100725	0.000410593
CATAAGCCACATTCTT_1	0.162928	0.00473834	0.0033802	0.000439168	0.00112632	0.784722	0.00139321	0.0412725
CATAAGCCACTTTAGG_1	0.000286074	0.00457896	0.955703	0.00141135	0.0169146	0.0167048	0.00376644	0.000634398
CATAAGCGTCGTCTCT_1	0.0844648	0.0256236	0.0363304	0.0629454	0.718617	0.0208224	0.0408052	0.010391
CATAAGCGTGACTGTT_1	0.0641047	0.172096	0.103623	0.00484934	0.0606081	0.582296	0.00841261	0.00401082
CATAAGCGTGATAGTA_1	0.00166503	0.0208839	0.207323	0.00970099	0.460806	0.169501	0.129177	0.000942423
CATAAGCTCGCTAATG_1	0.00062944	0.00207038	0.0570395	0.0304164	0.863767	0.0110408	0.0319469	0.0030901
CATACAGGTAAGATTG_1	0.0038363	0.00963474	0.101076	0.00164315	0.0746728	0.786258	0.0221584	0.000720744
CATACAGTCAGACCCG_1	0.857878	0.136278	0.000208881	0.000175081	0.000188864	0.00468157	0.000307514	0.000282028
CATACCCGTAGACAGC_1	0.00687185	0.013729	0.109424	0.0016687	0.409452	0.367586	0.0878748	0.0033942
CATACCCGTCGGTACC_1	0.00245655	0.00401452	0.201941	0.0133418	0.342069	0.403987	0.030643	0.00154623
CATACCCTCATGGTAC_1	0.220141	0.00605806	0.0032247	0.010775	0.32167	0.0709319	0.0505206	0.316678
CATACCCTCCGCGAGT_1	0.0778063	0.604661	0.0845197	0.00393723	0.0400985	0.0674977	0.117944	0.00353634
CATACTTGTCGTGGAA_1	0.311582	0.621605	0.00447109	0.00395414	0.0179377	0.00391318	0.0180468	0.0184899
CATACTTTCTGCGGCA_1	0.00635237	0.041583	0.023825	0.00896819	0.215006	0.0774012	0.61629	0.010575
CATAGACAGAACAAGG_1	0.0202692	0.0113645	0.013594	0.0535462	0.15641	0.0419738	0.697161	0.00568116
CATAGACGTTAGGGAC_1	0.00609045	0.214507	0.077121	0.00103274	0.0335066	0.62285	0.0395655	0.00532687
CATAGACGTTGTCCCT_1	0.0442873	0.129336	0.138626	0.00361704	0.0684164	0.533299	0.0792621	0.00315667
CATCAAGCACAACATC_1	0.00189495	0.00764938	0.390656	0.0015025	0.170103	0.384144	0.0410714	0.00297862
CATCAAGGTCACTTCC_1	0.992527	0.000973627	3.17809e-05	0.00026089	0.000122082	9.24471e-05	4.5323e-05	0.00594704
CATCAAGTCTAGGCCG_1	0.0115447	0.0607453	0.0612604	0.0057899	0.714946	0.066823	0.0653064	0.0135842
CATCCACGTGGAACAC_1	0.0246047	0.0538488	0.144701	0.300415	0.154801	0.261075	0.0518372	0.00871677
CATCCACGTGTTATCG_1	0.0468821	0.00952535	0.0101341	0.0260663	0.784247	0.0805747	0.0403443	0.00222583
CATCCGTGTTAAGACA_1	0.0131832	0.011244	0.0176394	0.221801	0.720274	0.00355452	0.00511666	0.00718725
CATCGCTCACAGACGA_1	0.0346133	0.266882	0.0365951	0.0109352	0.0175716	0.601764	0.0149844	0.0166546
CATCGCTTCTGACGCG_1	0.0314934	0.0420948	0.00658474	0.000775882	0.034193	0.780653	0.0966958	0.00750981
CATCGGGCACCGTACG_1	0.00233759	0.0144139	0.861885	0.011492	0.0645071	0.0400957	0.00428729	0.000981196
CATCGGGTCCTTGACC_1	0.00284769	0.017672	0.0149255	0.00167859	0.531416	0.250592	0.160248	0.0206203
CATCGTCAGCAGTCTT_1	0.158565	0.774024	0.0244494	0.00259903	0.00330774	0.0285165	0.00532889	0.00320924
CATCGTCAGGGTATAT_1	0.0935796	0.047237	0.0495406	0.0211	0.220007	0.169512	0.234499	0.164525
CATCGTCGTTCCTACC_1	0.0167211	0.219403	0.314586	0.00397345	0.0129263	0.422376	0.00714342	0.0028712
CATGAGTAGAAGCCAC_1	0.035379	0.264846	0.177981	0.0371743	0.122519	0.230039	0.128904	0.0031567
CATGCAAAGTACTCGT_1	0.0134741	0.0653627	0.200755	0.0513676	0.262694	0.349427	0.0508777	0.00604135
CATGCAACATACAGAA_1	0.00706442	0.763993	0.102935	0.00159986	0.089641	0.0138024	0.015615	0.00534988
CATGCAATCACTAGCA_1	0.0575289	0.127001	0.122449	0.0106717	0.0446227	0.603411	0.0221168	0.0121989
CATGCCTAGCTGAAAT_1	0.0258095	0.233893	0.393276	0.00641364	0.158092	0.165053	0.00889966	0.00856382
CATGCCTGTCCTTGTC_1	0.0023998	0.000981178	0.000823392	0.021246	0.859611	0.00282626	0.098864	0.013248
CATGCCTGTGCCGAAA_1	0.00476721	0.0269706	0.146588	0.0369003	0.506255	0.0501394	0.217355	0.0110244
CATGCCTGTGCTTATG_1	0.0100209	0.175537	0.331218	0.0454188	0.104248	0.307979	0.0214036	0.00417523
CATGCCTTCCGTGTAA_1	0.00628559	0.517383	0.260594	0.00464654	0.0733756	0.115081	0.0204633	0.00217167
CATGCGGCATCCGGTG_1	0.00796094	0.00581356	0.137951	0.0146263	0.573814	0.146473	0.107061	0.00629937
CATGCGGGTATCAAGA_1	0.00803411	0.00366536	0.00664432	0.00330253	0.28289	0.0112418	0.0373389	0.646883
CATGCTCAGCCATTTG_1	0.0118371	0.142609	0.400246	0.00853859	0.296592	0.126679	0.00937834	0.00411946
CATGCTCCAACTCCAA_1	0.245636	0.546546	0.0384747	0.00689654	0.0150273	0.0927012	0.0314291	0.0232885
CATGCTCCATCGATCA_1	0.00375369	0.0336524	0.32315	0.151812	0.44432	0.031348	0.00942165	0.00254254
CATGCTCGTAGCACGA_1	0.00951436	0.965145	0.00665107	0.000542755	0.0104641	0.00145169	0.00274005	0.00349101
CATGGATCAGGTCAAG_1	0.00368418	0.00879939	0.0315645	0.266071	0.566242	0.0768821	0.0340853	0.0126707
CATGGTACACATACGT_1	0.0106087	0.0139688	0.00636439	0.39286	0.329091	0.0894154	0.154936	0.00275532
CATGGTATCGAGTCCG_1	0.00257724	0.00859502	0.264897	0.0942483	0.375366	0.216445	0.0355311	0.0023398
CATTCATCAAGAGTAT_1	0.00522483	0.00187023	0.00118639	0.957008	0.0232784	0.0020051	0.0083334	0.00109374
CATTCATCAGCACCCA_1	0.00135625	0.0153972	0.0115432	0.000423656	0.00758335	0.923675	0.0380763	0.00194481
CATTCATGTTACACTG_1	0.07972	0.0841443	0.0244369	0.415442	0.253272	0.0743694	0.0487125	0.0199028
CATTCATTCCCATAAG_1	0.0770074	0.0348397	0.0380011	0.121978	0.634655	0.0301005	0.0547807	0.00863752
CATTCCGCAATCACGT_1	0.0008794	0.155089	0.390289	0.00300276	0.0424078	0.386432	0.0202303	0.00166914
CATTCTACAGCAGGAT_1	0.000781684	0.0159239	0.931678	0.00223363	0.0151192	0.03272	0.00101471	0.000528489
CATTCTAGTACGCTTA_1	0.00706537	0.168783	0.0394156	0.162205	0.525887	0.0218967	0.0695475	0.00520023
CATTCTAGTGGCTTGC_1	0.00874207	0.111524	0.458664	0.0153683	0.20506	0.16705	0.0268211	0.00677058
CATTCTATCCTTTGAT_1	0.634508	0.269632	0.00455166	0.0052982	0.0350334	0.00193235	0.0146231	0.0344208
CATTGAGTCCCGTGTT_1	0.0534136	0.49465	0.187906	0.00879402	0.1985	0.0397989	0.00596158	0.0109762
CATTGAGTCGCTGACG_1	0.06366	0.915343	0.00304814	0.000697189	0.000843364	0.0149696	0.00083164	0.000606698
CATTGCCCAGGCAATG_1	0.197035	0.63292	0.106936	0.00527754	0.0208238	0.0172154	0.0140974	0.00569476
CATTGCCGTAACAGTA_1	0.00411413	0.0247157	0.193401	0.0318665	0.0717859	0.668861	0.00434222	0.000913436
CATTGTTAGGATTCAA_1	0.00745106	0.130885	0.48459	0.00259289	0.295334	0.0448267	0.0303305	0.00398961
CATTGTTTCAACACGT_1	0.141587	0.132791	0.0222526	0.0384344	0.469091	0.0754346	0.109551	0.0108593
CATTTCAGTCCAAAGG_1	0.00134267	0.0762476	0.874495	0.00448633	0.0090859	0.0276624	0.00501606	0.00166372
CATTTCAGTTAGGGTG_1	0.00485343	0.00317554	0.00657524	0.644346	0.283249	0.0330924	0.0128609	0.0118471
CATTTCATCTTCTTCC_1	0.00768492	0.595076	0.122368	0.0247367	0.206622	0.0183983	0.018836	0.00627832
CCAAGCGCAGTATTCG_1	0.0139223	0.0876342	0.186078	0.0331657	0.213887	0.403772	0.0479774	0.0135637
CCAAGCGGTGGTATGG_1	0.00273645	0.0156727	0.0454971	0.00788086	0.689492	0.199534	0.0301815	0.0090053
CCAATGAGTAACGTTC_1	0.00821806	0.423421	0.221573	0.00668135	0.258336	0.0420199	0.0298434	0.00990752
CCAATGAGTCTTACAG_1	0.00407588	0.0189934	0.164068	0.00765326	0.23878	0.295367	0.20728	0.0637821
CCAATTTGTGCCGGTT_1	0.0180354	0.0636964	0.0164854	0.044544	0.824719	0.00858074	0.0171731	0.00676612
CCACAAACACCCGTAG_1	0.00521143	0.00840011	0.0497542	0.82962	0.0641415	0.0178046	0.0213598	0.00370824
CCACAAAGTAGGAGTC_1	0.0180386	0.0905222	0.0128707	0.0199467	0.410634	0.332503	0.108443	0.00704147
CCACAAATCTCCAAGA_1	0.00242069	0.0206958	0.437145	0.0796263	0.144656	0.29007	0.0233493	0.0020357
CCACAAATCTTTCTAG_1	0.00300498	0.0191143	0.066882	0.000592373	0.667577	0.0908539	0.146672	0.00530317
CCACCATAGGGTCACA_1	0.772886	0.00261646	7.74922e-05	0.000323717	0.00218655	0.000154065	0.00239414	0.219361
CCACCATCAATGAAAC_1	0.00548915	0.153397	0.545568	0.0559871	0.184334	0.0427256	0.00722529	0.00527384
CCACGAGCAAAGCTCT_1	0.016192	0.0175616	0.0149765	0.0139189	0.396708	0.0172729	0.137576	0.385795
CCACGTTAGCTGTACT_1	0.0048378	0.0111099	0.475812	0.00574516	0.150829	0.239719	0.0644054	0.0475416
CCACGTTCACCCGTAG_1	0.00278476	0.0107329	0.0971349	0.00943072	0.410271	0.397626	0.065771	0.00624869
CCACGTTCATCTGGGC_1	0.0137831	0.0889435	0.207069	0.00473881	0.29626	0.32323	0.0636372	0.00233879
CCACTTGAGATCACCT_1	0.00221302	0.0118882	0.0847263	0.320408	0.262223	0.168484	0.137097	0.0129603
CCACTTGCAGGTGACA_1	0.301274	0.0126942	0.00577392	0.0395136	0.127285	0.035512	0.426584	0.0513628
CCACTTGTCGAACGCC_1	0.0185974	0.0969389	0.0499888	0.0740307	0.320087	0.38713	0.0479479	0.00527875
CCATAAGCACGTTCGG_1	0.0242091	0.00577247	0.0204037	0.00409235	0.0903101	0.840575	0.0130011	0.00163632
CCATAAGCACTCTCGT_1	0.00483288	0.0170627	0.0165115	0.000824642	0.033334	0.901138	0.0249032	0.00139291
CCATAAGCACTTCAAG_1	0.00548328	0.000848554	0.0015107	0.496982	0.445297	0.0357616	0.0106372	0.00347964
CCATAAGTCGGTTAGT_1	0.0521367	0.0919022	0.0285229	0.0123614	0.326003	0.25094	0.229873	0.00826137
CCATCACCAATCTCTT_1	0.639652	0.343568	0.00242916	0.000207333	0.00176997	0.00939374	0.00206338	0.000917361
CCATCACTCAACTCTT_1	0.051364	0.161427	0.152042	0.0534193	0.181212	0.323374	0.0734479	0.00371221
CCCAACTTCTAGATCG_1	0.00786132	0.00583577	0.00913314	0.00358842	0.075766	0.00801886	0.793034	0.0967626
CCCATTGAGACCGCCT_1	0.0665513	0.0591555	0.0868318	0.348658	0.18444	0.212551	0.035893	0.00591974
CCCATTGCACAAAGTA_1	0.149621	0.00436208	0.0027831	0.0072604	0.0690573	0.061415	0.0129929	0.692508
CCCATTGTCGTTGTTT_1	0.0176574	0.0145288	0.746926	0.00376613	0.0476307	0.15326	0.0125886	0.00364323
CCCGAAGCATTGGATC_1	0.156155	0.762381	0.00554532	0.00503478	0.00440873	0.0396908	0.00868487	0.0180989
CCCGAAGTCCATTGCC_1	0.0141671	0.159276	0.182853	0.0459944	0.298238	0.187334	0.0978077	0.0143293
CCCGGAACAATCAGCT_1	0.00499371	0.0113837	0.00821901	0.353209	0.606541	0.00846788	0.00658703	0.000598646
CCCGGAACACGGCTAC_1	0.0292583	0.169555	0.203394	0.0096955	0.142569	0.407736	0.0331666	0.00462638
CCCGGAAGTCCTATAG_1	0.0620262	0.0849237	0.0467187	0.481985	0.205351	0.0818329	0.0122356	0.0249268
CCCGGAAGTTCTCCAC_1	0.0078877	0.192458	0.120507	0.0262097	0.247512	0.190878	0.2046	0.00994827
CCCGGAATCGAGATGG_1	0.00294403	0.00268584	0.013336	0.0208645	0.25182	0.544175	0.159637	0.00453747
CCCTAACGTACTAACC_1	0.00444629	0.0226269	0.41828	0.000670238	0.0216469	0.526785	0.00418018	0.00136387
CCCTCAAAGAGAGAAC_1	0.0342444	0.941841	0.00786987	0.000151733	0.00282016	0.00756083	0.00415094	0.00136073
CCCTCAAAGCCATGCC_1	0.783541	0.142517	0.005862	0.00346266	0.0140215	0.0211941	0.02201	0.00739097
CCCTCAAAGCTGGCCT_1	0.0098721	0.0353828	0.0392742	0.00156845	0.0618451	0.836904	0.0144972	0.000656037
CCCTCAAAGGGTACAC_1	0.0370055	0.897309	0.0196391	0.000778938	0.0119531	0.0169208	0.00765089	0.00874239
CCCTCAATCAGCCCAG_1	0.0141926	0.858874	0.0602918	0.00481868	0.00412085	0.053475	0.00300412	0.00122276
CCCTCAATCAGCTGTA_1	0.0209958	0.181554	0.10548	0.0022276	0.0636353	0.604556	0.0126807	0.00887083
CCCTCAATCGAAACAA_1	0.00162346	0.00349721	0.0728657	0.0135059	0.818271	0.0592712	0.0266813	0.0042844
CCCTCAATCGGTCGAC_1	0.0112686	0.0207991	0.0676511	0.0120035	0.380119	0.0248057	0.18359	0.299764
CCCTGATCACAGCCTG_1	0.0180607	0.105841	0.532605	0.0921527	0.0727116	0.0757364	0.0848759	0.0180164
CCCTGATTCCATCCGT_1	0.0627938	0.855927	0.00393995	0.0351575	0.0152171	0.0183588	0.00331899	0.00528654
CCCTGATTCGAAATCC_1	0.14999	0.104569	0.173312	0.0322282	0.203634	0.238762	0.0868698	0.0106352
CCCTTAGTCCGTAGGC_1	0.0188079	0.412568	0.00875114	0.0030297	0.00597221	0.492768	0.0180091	0.0400944
CCCTTAGTCCGTCACT_1	0.804467	0.131662	0.00237768	0.00164609	0.00367424	0.0293817	0.0236852	0.00310548
CCGCAAGAGCAATTCC_1	0.0357317	0.0770017	0.141406	0.0131306	0.363147	0.259189	0.107732	0.00266182
CCGCAAGAGTTGGGAC_1	0.00370408	0.0279735	0.397251	0.00570869	0.375353	0.153533	0.0336263	0.00285056
CCGGACACATAAGCAA_1	0.00960574	0.0306922	0.733374	0.00228791	0.157301	0.0590204	0.00371857	0.00399989
CCGGGTAGTCGCTGCA_1	0.00788486	0.00395769	0.16153	0.0267618	0.589976	0.184282	0.0231324	0.0024758
CCGGGTATCCGGACTG_1	0.0185463	0.024428	0.253146	0.00448195	0.156034	0.411608	0.112199	0.0195554
CCGGTAGTCACCTCAC_1	0.015588	0.0214024	0.234927	0.0357707	0.570307	0.0418276	0.0697839	0.0103943
CCGGTAGTCGCAGTTA_1	0.00468863	0.0611579	0.170755	0.0714333	0.564468	0.0907101	0.0188479	0.0179393
CCGGTAGTCGTCTCAC_1	0.222509	0.453726	0.032518	0.00423183	0.0291654	0.143232	0.0380125	0.0766052
CCGGTGAGTGGTCCCA_1	0.0143504	0.021679	0.11152	0.00331123	0.288039	0.301524	0.196712	0.0628645
CCGGTGATCCCATAGA_1	0.0388249	0.179541	0.0459097	0.00736723	0.560646	0.124451	0.0232123	0.0200477
CCGGTGATCGTAGCTA_1	0.00176289	0.995007	0.00027617	0.00014452	0.000517045	0.00017785	0.000870286	0.00124404
CCGTAGGAGCGGTAGT_1	0.0990895	0.900352	7.56538e-05	1.77499e-05	1.82049e-05	9.5174e-05	2.34521e-05	0.000328492
CCGTAGGCACATTGTG_1	0.0511051	0.0499877	0.428914	0.0154734	0.244965	0.122128	0.0622173	0.0252093
CCGTAGGCATAAGCGG_1	0.0288872	0.02322	0.0685198	0.0088268	0.203549	0.364545	0.293319	0.00913305
CCGTGAGAGTCACTGT_1	0.0033535	0.0452435	0.0872688	0.00652292	0.846612	0.00557961	0.0048811	0.000538177
CCTACGTCAAAGCTCT_1	0.186347	0.201217	0.0752563	0.00373783	0.0282046	0.41948	0.0522884	0.033468
CCTACGTTCTGATGGT_1	0.0106754	0.00768595	0.0468532	0.00186291	0.0279199	0.899338	0.00436802	0.0012967
CCTATCGAGGACAAGA_1	0.895068	0.010643	0.000782027	9.83436e-05	0.001168	0.000594398	0.00192351	0.0897223
CCTATCGGTAACAGGC_1	0.00535027	0.0355878	0.679067	0.00225122	0.241983	0.0286534	0.00444025	0.00266666
CCTATCGGTTAGGCCC_1	0.01045	0.0160963	0.153502	0.0206411	0.154136	0.619395	0.0138875	0.0118924
CCTATCGTCCGTGTAA_1	0.0182375	0.0319648	0.18377	0.125688	0.494618	0.11586	0.0239321	0.00593007
CCTCAACAGCGACTGA_1	0.0116479	0.0106897	0.0512596	0.149261	0.364833	0.365606	0.0429772	0.00372614
CCTCAACCAACGAGGT_1	0.00644075	0.0389489	0.141724	0.0621166	0.718445	0.0109548	0.0184868	0.00288322
CCTCAACCAATCTAGC_1	0.0143815	0.0661558	0.021614	0.0301829	0.821735	0.0116577	0.0225878	0.0116849
CCTCACACAACAGTGG_1	0.0165753	0.00485288	0.00778752	0.190235	0.673052	0.0235006	0.0284629	0.0555335
CCTCACACAGATCCTA_1	0.00444512	0.00739362	0.0351346	0.0306301	0.588275	0.115478	0.21481	0.00383296
CCTCACACAGTTAGGG_1	0.00987298	0.0100416	0.0998311	0.00747431	0.481644	0.36439	0.0251119	0.00163356
CCTCACAGTAGACACG_1	0.0389183	0.0454675	0.0570603	0.0824949	0.570717	0.128989	0.0717758	0.00457807
CCTCAGTCACAGAGCA_1	0.0102034	0.35771	0.196646	0.0014736	0.0639579	0.326972	0.0383417	0.00469604
CCTCATGAGGCCCACT_1	0.0105816	0.278312	0.166646	0.0785795	0.34382	0.0493026	0.0687618	0.00399727
CCTCCAAAGTAGGGTC_1	0.00389685	0.0173372	0.00880212	0.0687593	0.823716	0.0358798	0.0326283	0.00898013
CCTCCAACATAGAAAC_1	0.00357818	0.0696502	0.0185913	0.0354089	0.805029	0.031258	0.0353286	0.00115607
CCTCCAATCCCTCTCC_1	0.143465	0.180815	0.091328	0.0307023	0.259126	0.0746163	0.206488	0.0134596
CCTCCTCGTCCTCCAT_1	0.017394	0.0218282	0.0182097	0.176326	0.730118	0.0140113	0.0163467	0.00576661
CCTCTAGGTTTACGTG_1	0.00160288	0.0295641	0.39282	0.000381136	0.119026	0.425262	0.0294175	0.00192609
CCTCTCCAGCTCCGAC_1	0.00223312	0.00102862	0.000617689	0.00521976	0.763019	0.00092365	0.0388566	0.188101
CCTCTCCGTAGTCGTT_1	0.00531355	0.195313	0.645753	0.00628851	0.118594	0.0184468	0.00605039	0.00424057
CCTGCATCACACGGTC_1	0.0606716	0.203096	0.0574473	0.0429171	0.324166	0.0400544	0.18076	0.0908869
CCTGCATCACGGTAGA_1	0.00158848	0.00609328	0.00792891	3.3757e-05	0.00245104	0.975093	0.00602736	0.000784409
CCTGCATTCGGAATTC_1	0.0364069	0.0775754	0.160296	0.00210828	0.0492074	0.642116	0.0172059	0.0150837
CCTGTTGAGCTAAGTA_1	0.00365782	0.0176926	0.107798	0.00601858	0.251182	0.533833	0.0778048	0.00201354
CCTGTTGTCAAGTGTC_1	0.00104289	0.028828	0.234491	0.0264175	0.64632	0.0232607	0.0368395	0.00279952
CCTTCAGGTTGCCGCA_1	0.00939707	0.0228904	0.0385058	0.233534	0.458801	0.0493396	0.181921	0.00561078
CCTTGTGAGAGCAGTC_1	0.0555992	0.0152035	0.0288734	0.0069137	0.277041	0.166564	0.442348	0.00745779
CCTTGTGGTTGTACGT_1	0.0365859	0.17218	0.11996	0.0196397	0.392798	0.0791337	0.0696289	0.110074
CCTTGTGTCTAGATCG_1	0.912358	0.0264227	0.000286175	0.00138901	0.00108776	0.0128827	0.00113535	0.0444387
CCTTTGGTCCAAGCCG_1	0.0116389	0.0422201	0.12914	0.0447942	0.141879	0.579558	0.0374753	0.0132943
CCTTTGGTCGAGCCTG_1	0.290032	0.0125167	0.00798355	0.16839	0.308129	0.0426025	0.159189	0.0111582
CGAAGTTAGCAAATCA_1	0.0303034	0.0153431	0.0586985	0.00784431	0.744969	0.0413574	0.0280336	0.0734506
CGAAGTTTCTTAATCC_1	0.00695501	0.446435	0.00489879	0.00162541	0.0102687	0.511697	0.0168457	0.00127418
CGAATTGTCTACTATC_1	0.00441184	0.107	0.661503	0.0214889	0.156227	0.0408068	0.00701739	0.00154507
CGAATTGTCTGCCTGT_1	0.0768559	0.892154	0.00451404	0.0147132	0.00228566	0.00351828	0.00282426	0.00313502
CGACAGCGTTCGTGCG_1	0.400011	0.386497	0.069648	0.00910525	0.066352	0.0511571	0.00997735	0.00725225
CGACAGCGTTTCGGCG_1	0.0395464	0.0261753	0.0854711	0.608982	0.204846	0.0260251	0.00714085	0.00181283
CGAGAAGTCGCCTTGT_1	0.0296394	0.212407	0.173679	0.0687149	0.0503804	0.177306	0.0327649	0.255108
CGAGGAACAAATACAG_1	0.162964	0.00700836	0.006652	0.00460077	0.237809	0.0214911	0.164331	0.395143
CGAGGAACACCGTGCA_1	0.0314058	0.0416029	0.0258477	0.016831	0.113739	0.350077	0.108553	0.311944
CGAGGCTAGAGTGGCT_1	0.0375628	0.0202261	0.0406029	0.0841646	0.543954	0.194314	0.0593621	0.0198136
CGAGGCTTCCAGTGTA_1	0.00502974	0.012746	0.622114	0.163879	0.153962	0.0204027	0.00868136	0.0131842
CGAGGCTTCCTTGAAG_1	0.0171952	0.0306679	0.115825	0.00538791	0.447592	0.317994	0.0397906	0.0255471
CGAGTGCCAATTGCAC_1	0.0144991	0.617773	0.109729	0.00162019	0.119167	0.108816	0.0142953	0.0141008
CGAGTGCCACACGTGC_1	0.147192	0.78891	0.00888691	0.00545648	0.011428	0.00535319	0.0144894	0.0182845
CGAGTGCGTAACTAAG_1	0.0197519	0.204197	0.212224	0.00283591	0.0404071	0.475699	0.0327013	0.012185
CGAGTGCGTACCTTCC_1	0.0578439	0.0600519	0.061547	0.0401968	0.127217	0.0641027	0.0791337	0.509907
CGAGTGCGTAGGAGGG_1	0.0198798	0.0279744	0.0967457	0.0396787	0.280844	0.230903	0.194057	0.109918
CGAGTGCTCTTGTTAC_1	0.0785942	0.00770831	0.0260237	0.0224824	0.0677906	0.119276	0.532748	0.145377
CGAGTTAAGTGCTACT_1	0.189062	0.0779979	0.0191964	0.000531061	0.000343617	0.710464	0.00152668	0.000879123
CGAGTTATCAGGTAAA_1	0.672853	0.00254162	0.000221706	0.000326516	0.000501661	7.84695e-05	0.00199625	0.321481
CGATCGGCAACTCCAA_1	0.0863868	0.00597865	0.00290658	0.020652	0.127814	0.0173603	0.725229	0.0136732
CGATCGGGTTTAGACC_1	0.0176389	0.377401	0.390684	0.00842345	0.106223	0.0707514	0.0235402	0.00533848
CGATGCGAGGATATAC_1	0.00200836	0.00327723	0.06581	0.0158462	0.706624	0.0201782	0.159894	0.026362
CGATGCGTCTACAGGT_1	0.0041797	0.269566	0.225652	0.000882508	0.0716127	0.406423	0.017265	0.00441912
CGATGGCAGTGGTTCT_1	0.00365189	0.0177007	0.20377	0.00146561	0.0355389	0.728271	0.00855082	0.00105177
CGATGGCTCATCGTAG_1	0.00274104	0.00861973	0.0581249	0.00307047	0.587843	0.133128	0.204356	0.00211639
CGCAGGTGTGGCTCTG_1	0.000955568	0.0521437	0.213747	0.00127082	0.409861	0.169325	0.146903	0.00579437
CGCAGGTGTGGTCTAT_1	0.011475	0.0326389	0.00376511	0.833605	0.0930356	0.00745386	0.00535224	0.0126741
CGCATAATCGTGTCAA_1	0.00597399	0.331634	0.207496	0.00190521	0.026244	0.397197	0.027236	0.00231379
CGCATGGCATCGTGCG_1	0.000856137	0.0054136	0.0828428	0.025343	0.82407	0.0423122	0.0179161	0.00124604
CGCATGGTCGCTAAAC_1	0.00565821	0.00921253	0.0397603	0.358692	0.545916	0.0235591	0.0153551	0.00184679
CGCATGGTCTCAGTCC_1	0.00748298	0.0191094	0.0102755	0.0644996	0.689544	0.0132348	0.184304	0.0115503
CGCCATTCAGAGACTG_1	0.0265785	0.0636319	0.173205	0.0839632	0.55823	0.0341421	0.0278531	0.0323963
CGCCATTTCCATAGAC_1	0.0257288	0.0080423	0.0156672	0.158755	0.729652	0.0248201	0.0232396	0.0140953
CGCGTGACATCCCACT_1	0.00275572	0.0172558	0.0483995	0.00466462	0.158718	0.255221	0.510596	0.0023895
CGGAACCGTGGTCCGT_1	0.0115518	0.0109629	0.0546527	0.035518	0.459717	0.248502	0.120785	0.0583106
CGGAATTCAGGAACCA_1	0.00721697	0.00693199	0.0149975	0.00533067	0.396191	0.507478	0.0602468	0.00160723
CGGAATTTCCGTGTGG_1	0.0334839	0.0725354	0.473976	0.116226	0.266453	0.0207427	0.0114264	0.00515732
CGGACACAGTCTTCCC_1	0.0295272	0.00629417	0.0341386	0.268897	0.607937	0.0204086	0.0231044	0.00969325
CGGAGAAAGACAGTCG_1	0.046608	0.217994	0.0398218	0.032089	0.482658	0.0512821	0.106382	0.0231645
CGGCAGTAGTTACGTC_1	0.00452322	0.00610041	0.262366	0.00108767	0.49136	0.217626	0.0126521	0.00428594
CGGCAGTCATCTAGAC_1	0.0702654	0.132053	0.231265	0.0135839	0.0853527	0.382416	0.0641885	0.020875
CGGCAGTGTTCGAACT_1	0.0171185	0.089387	0.03467	0.00143688	0.027171	0.812985	0.00879541	0.00843591
CGGCAGTTCATGCATG_1	0.0123318	0.580606	0.260334	0.00213694	0.0472626	0.0778296	0.017225	0.00227478
CGGGACTAGCGTCGAA_1	0.259174	0.67016	0.00597254	0.00593899	0.00929514	0.0176691	0.0258666	0.00592383
CGGGCATCAGCACGAA_1	0.012676	0.0113894	0.0403907	0.125527	0.6473	0.11524	0.0415079	0.00596876
CGGGCATCATTGGATC_1	0.0117215	0.0245599	0.64121	0.00169696	0.0329387	0.270856	0.0095211	0.00749641
CGGGCATTCCTTGAAG_1	0.0409094	0.162165	0.0619879	0.00464507	0.0178011	0.578771	0.033156	0.100564
CGGGTCACACAGCCTG_1	0.0143892	0.355107	0.192079	0.00545127	0.279097	0.109332	0.0312917	0.0132515
CGGGTCAGTACCAGAG_1	0.0118827	0.00709514	0.0129297	0.00875522	0.758123	0.0293997	0.154368	0.0174458
CGGGTCAGTCTCAGAT_1	0.0583285	0.938276	0.00101806	0.0001055	0.000131088	0.0017569	0.000230559	0.000153077
CGGGTCATCAACGCTA_1	0.131205	0.425089	0.0211997	0.00350854	0.0304229	0.297797	0.0677031	0.0230749
CGGGTCATCCAGTTCC_1	0.00163324	0.0261314	0.881127	0.000492214	0.0741813	0.0141352	0.00132425	0.000975737
CGGGTGTCAAGTGGCA_1	0.802102	0.0873958	0.00141392	0.00164033	0.0100337	0.0762938	0.0110565	0.0100636
CGGTCAGCAAGACTGG_1	0.0112235	0.026892	0.0386736	0.00374274	0.0984988	0.78481	0.0332893	0.00287021
CGTAAGTAGAGCCCAA_1	0.00260356	0.055976	0.181661	0.0368699	0.651307	0.0570773	0.0131217	0.00138414
CGTAAGTAGTGTCATC_1	0.0267586	0.115335	0.0391901	0.150991	0.560884	0.0704738	0.0303739	0.00599396
CGTAAGTGTCTAACGT_1	0.0718466	0.0145828	0.00571178	0.00134381	0.00572806	0.835655	0.0189514	0.0461803
CGTAAGTGTTCCGCTT_1	0.0112562	0.0910752	0.0864052	0.11358	0.516602	0.149998	0.0218306	0.00925346
CGTAATGAGAGTGACC_1	0.00588407	0.00741875	0.195165	0.00133511	0.278085	0.47582	0.0280825	0.00820896
CGTAATGGTAGAGATT_1	0.996346	2.33294e-05	3.24915e-06	0.000142955	3.10602e-05	0.00223878	2.13624e-05	0.00119364
CGTAATGTCCACAGGC_1	0.0600736	0.0306759	0.127064	0.17477	0.354618	0.222109	0.0252406	0.00544835
CGTAATGTCCGTGCGA_1	0.122511	0.0318402	0.0261603	0.0858409	0.268354	0.1345	0.241502	0.089291
CGTAATGTCTCCTGTG_1	0.323963	0.162542	0.108493	0.0521887	0.134032	0.0585872	0.135355	0.0248383
CGTAGTAAGTGGGAAA_1	0.388916	0.504447	0.0173764	0.000784848	0.00520633	0.0534032	0.0183262	0.0115408
CGTAGTAGTTCGAAGG_1	0.00258912	0.982646	0.00330598	0.000885737	0.00199562	0.00235566	0.00519164	0.00103004
CGTAGTATCGCTTGAA_1	0.0567859	0.591959	0.0518858	0.0136604	0.0889154	0.147238	0.0447902	0.00476558
CGTCAAAGTCACTTAG_1	0.912061	0.00358406	0.00285304	0.0126373	0.0178382	0.0190911	0.00569961	0.0262361
CGTCCATAGATTGAGT_1	0.102817	0.0165516	0.0252661	0.230117	0.479428	0.0235398	0.0590285	0.0632524
CGTCCATCATAATGAG_1	0.0901017	0.855601	0.00532401	0.00696522	0.0122679	0.0151024	0.00786374	0.00677412
CGTCCATGTCTACGAT_1	0.00426095	0.0274117	0.0281767	0.0231354	0.860016	0.0261994	0.0285505	0.00224895
CGTCCATTCCATGAGT_1	0.0228331	0.00913326	0.00381151	0.0208193	0.0231475	0.0243771	0.0595137	0.836365
CGTGAATAGAACTCCT_1	0.0126953	0.0202617	0.181009	0.258726	0.494204	0.0242625	0.00572358	0.00311777
CGTGAATCACTTTATC_1	0.00340979	0.00222409	0.00133922	0.95928	0.0312	0.00118736	0.000782103	0.000577594
CGTGAATCAGTAGATA_1	0.00868545	0.0291513	0.262469	0.015369	0.0812499	0.55788	0.0403711	0.00482461
CGTGAATTCCGACATA_1	0.524834	0.333018	0.0134174	0.00905446	0.0313618	0.00634301	0.00683605	0.0751356
CGTGATAAGGACTAAT_1	0.000498745	0.0375576	0.0231093	0.00121415	0.018411	0.776045	0.141302	0.00186141
CGTGATAAGGTCTGGA_1	0.00340947	0.0100908	0.238882	0.00538829	0.646214	0.0659003	0.0278041	0.00231101
CGTGATATCCTTCTGG_1	0.0057574	0.0483693	0.355203	0.00505448	0.554239	0.0251696	0.00491444	0.00129297
CGTGATATCTCGAGTA_1	0.00930465	0.00751877	0.00341054	0.837062	0.117723	0.0052577	0.0147909	0.00493278
CGTGCTTAGACAACAT_1	0.617033	0.0127662	0.00541867	0.00897311	0.170364	0.0313683	0.0677518	0.0863251
CGTGCTTAGATTTGCC_1	0.00113926	0.00805755	0.168303	0.00166726	0.46117	0.302042	0.0543921	0.00322923
CGTGCTTCATGTTTGG_1	0.0172362	0.0382073	0.660349	0.00652726	0.140722	0.11972	0.0105896	0.00664837
CGTGTCTAGTCACTAC_1	0.00135359	0.00179399	0.0129424	0.000843038	0.250364	0.034885	0.673208	0.0246099
CGTGTCTTCCCGTTCA_1	0.00493253	0.0581668	0.124872	0.00888951	0.556784	0.0376316	0.198256	0.0104669
CGTGTCTTCCTACGGG_1	0.00594371	0.00701487	0.0277263	0.0189886	0.163602	0.760828	0.0146067	0.00128982
CGTGTCTTCGACCTAA_1	0.0227126	0.770579	0.0762275	0.00076705	0.00762092	0.110619	0.00757018	0.00390352
CGTGTCTTCTAGTGAC_1	0.162473	0.79646	0.00259947	0.00176611	0.00701586	0.00504822	0.0143148	0.0103227
CGTTAGAAGCTGAAGC_1	0.00584552	0.00535922	0.00179186	0.947544	0.0113876	0.00234046	0.00565486	0.0200761
CGTTAGAAGGCCGCTT_1	0.0214439	0.0201157	0.238348	0.00981415	0.0477546	0.631072	0.0269721	0.00447942
CGTTCTGGTCCCGCAA_1	0.0283962	0.0188457	0.0842184	0.0548161	0.328712	0.419988	0.049784	0.0152394
CGTTGGGAGACGCTCC_1	0.0705429	0.0192238	0.0108335	0.0194835	0.514381	0.263565	0.0506025	0.0513679
CGTTGGGGTTTACCTT_1	0.437184	0.559021	0.000743045	6.7912e-05	0.000292128	0.00141587	0.000564594	0.000712097
CGTTGGGTCGTCGACG_1	0.0589679	0.0705011	0.103706	0.00671768	0.675207	0.0539291	0.0232946	0.00767636
CTAACCCGTGGAAATT_1	0.435857	0.020983	0.00369916	0.0170838	0.201316	0.015267	0.0696231	0.236171
CTAAGTGAGTCATCGT_1	0.492749	0.113862	0.0125396	0.00411975	0.00896185	0.327717	0.0373936	0.00265719
CTAAGTGCAACTGAAA_1	0.0103068	0.122934	0.384343	0.00480573	0.0719209	0.367604	0.0329763	0.00510883
CTAAGTGCATAATCGC_1	0.553176	0.438979	0.00266254	0.000324209	0.000532646	0.00320837	0.000201806	0.000915452
CTAAGTGGTATGGTTC_1	0.00671462	0.0953837	0.490003	0.0328436	0.120138	0.24279	0.0104089	0.00171763
CTACAGAAGGTCACAG_1	0.00435892	0.0105583	0.0163827	0.00799529	0.186204	0.319925	0.44517	0.00940588
CTACAGACAAATGGCG_1	0.0795274	0.0222217	0.0652311	0.00640797	0.0623783	0.734545	0.0160742	0.0136147
CTACAGATCTAGTGTG_1	0.0319686	0.0395473	0.203155	0.00591039	0.421575	0.202929	0.0871973	0.00771791
CTACAGATCTCGGCTT_1	0.00972697	0.114853	0.0909675	0.00509977	0.12263	0.431598	0.163103	0.0620228
CTACATTAGTCTAACC_1	0.00843818	0.0387255	0.122649	0.0731166	0.402303	0.154113	0.182288	0.0183659
CTACATTTCTAGTACG_1	0.104084	0.77708	0.0577892	0.00339455	0.0198555	0.012867	0.0148881	0.0100413
CTACCTGAGATTTGCC_1	0.947926	0.000829456	0.000586975	0.00282198	0.00282958	0.00778754	0.00124764	0.0359712
CTACCTGAGTGATTCC_1	0.0116673	0.0337379	0.0819387	0.146256	0.532638	0.0885386	0.0983537	0.00686968
CTACGGGCAAGTGGAC_1	0.000177825	0.00729924	0.947846	0.000500441	0.00668694	0.0367314	0.000499897	0.000258224
CTACGGGCACCTGAAT_1	0.0273969	0.656484	0.151949	0.0436772	0.0411771	0.04319	0.0161781	0.0199475
CTACGGGTCCCAAGTA_1	0.00166377	0.0621829	0.645132	0.000624447	0.0585636	0.221233	0.00779228	0.00280761
CTACGGGTCGTCCTTG_1	0.0204004	0.199386	0.227095	0.0706318	0.215898	0.242538	0.0192813	0.00476988
CTACTATGTAGCGAGT_1	0.0039584	0.00814409	0.182288	0.000267707	0.0227166	0.757705	0.0156895	0.00923057
CTAGACAAGAGAGCAA_1	0.0253013	0.974248	0.000305213	2.14998e-05	2.57046e-05	2.57746e-05	3.95047e-05	3.28736e-05
CTAGACACAGTGCCTG_1	0.0872432	0.563563	0.0635293	0.0442099	0.0808339	0.0711985	0.0821376	0.00728435
CTAGACAGTCCTACGG_1	0.0727074	0.252457	0.0493783	0.0125828	0.0572728	0.41823	0.121355	0.0160169
CTAGACAGTGCAGTGA_1	0.0203098	0.0690112	0.057858	0.0367335	0.466548	0.16896	0.166391	0.0141874
CTAGGTAAGTTGCTGT_1	0.000249267	3.02028e-05	4.49171e-05	0.998005	0.0011449	6.69201e-05	7.25953e-05	0.0003858
CTAGGTACACTTCATT_1	0.352691	0.307173	0.0277123	0.0519396	0.151323	0.0575492	0.0343136	0.0172984
CTATCCGAGTGAGGTC_1	0.00463591	0.00155206	0.00702774	0.633385	0.314828	0.0260759	0.0119543	0.000541192
CTATCCGGTAGCGATG_1	0.0857963	0.0282094	0.0114886	0.000317094	0.00161763	0.849721	0.0190063	0.00384322
CTATCTACAAGCGAAC_1	0.00138821	0.00663689	0.0774012	0.0140488	0.22529	0.648175	0.0258506	0.00120909
CTCAACCGTTAACAGA_1	0.0449544	0.215977	0.0310714	0.502388	0.185395	0.00643729	0.00657336	0.00720324
CTCAACCTCCGGACGT_1	0.0108898	0.064792	0.152674	0.0359371	0.34022	0.324446	0.0685595	0.00248189
CTCAAGACACCAACAT_1	0.380696	0.0355565	0.0477157	0.0543583	0.151097	0.0992572	0.11918	0.112139
CTCAAGACAGACCTGC_1	0.747653	0.0524182	0.00641753	0.00540277	0.0102306	0.158227	0.0115378	0.00811335
CTCAAGAGTCGAGCAA_1	0.00765206	0.00197361	0.000994753	0.0336931	0.93692	0.00747927	0.00883786	0.00244924
CTCAATTCAACGACAG_1	0.00516662	0.0097817	0.0163254	0.14456	0.765688	0.014622	0.0357069	0.00815017
CTCAATTGTAACTGCT_1	0.010243	0.832096	0.00505696	0.00659315	0.0595691	0.00509721	0.0623972	0.0189473
CTCAATTTCACTCACC_1	0.00483725	0.116467	0.274444	0.0174296	0.0963085	0.45933	0.0294323	0.00175098
CTCACTGAGGTAAGTT_1	0.0716774	0.890038	0.00363736	0.000792778	0.00177391	0.02345	0.00478022	0.00385015
CTCACTGCAATGGCCC_1	0.0515838	0.198187	0.0694163	0.182146	0.357609	0.04132	0.0952085	0.00452846
CTCAGAAAGAGGACTC_1	0.0317982	0.0258267	0.0379973	0.0893573	0.0916442	0.710157	0.0103495	0.00287011
CTCAGAAGTCACTTCC_1	0.0153758	0.0397514	0.0373251	0.000799707	0.607568	0.0652999	0.223688	0.0101919
CTCAGAAGTCGAGCTC_1	0.0100284	0.585893	0.166266	0.0263401	0.084337	0.0324403	0.0924144	0.00228026
CTCAGAAGTGGGAGAG_1	0.00337305	0.00882076	0.00258922	0.522482	0.43056	0.00566723	0.021332	0.00517588
CTCAGAAGTTTCGCTC_1	0.00576599	0.026535	0.0391183	0.00267407	0.436667	0.0790103	0.391897	0.0183326
CTCAGGGTCTACTCAT_1	0.000457791	0.00927996	0.975638	0.00014638	0.0042919	0.00624166	0.00279827	0.00114562
CTCAGTCGTTAGAAAC_1	0.00861448	0.0297089	0.0263648	0.00255251	0.255842	0.527737	0.139104	0.0100763
CTCATCGCATGTACGT_1	0.0262424	0.0603045	0.0589177	0.0355937	0.392499	0.353022	0.0695645	0.00385615
CTCATCGGTACAAGCG_1	0.0257003	0.0773936	0.629498	0.0080862	0.12209	0.124187	0.00677607	0.00626787
CTCATCGGTTCTAACG_1	0.00143299	0.0547805	0.803393	0.00271194	0.0756183	0.0542876	0.00673751	0.0010378
CTCATTACATCTCCCA_1	0.00468033	0.0509887	0.283329	0.120701	0.112264	0.132168	0.290788	0.00508079
CTCATTAGTTGGACCC_1	0.610575	0.0531904	0.057454	0.0143838	0.0896722	0.0889338	0.0179393	0.0678513
CTCCAACCACATACTG_1	0.00972505	0.0130501	0.0967027	0.00584773	0.672391	0.155187	0.0440853	0.00301096
CTCCACAGTAGTGCGA_1	0.00619869	0.0144508	0.0273593	0.112103	0.739742	0.0272602	0.0188918	0.0539939
CTCCATGCAAACGTGG_1	0.0306674	0.25809	0.0832341	0.00515622	0.188743	0.301273	0.127518	0.00531821
CTCCATGGTCGCACAC_1	0.421644	0.467056	0.00964946	0.00120748	0.00423151	0.088755	0.00445133	0.00300527
CTCCCAACATGCACTA_1	0.957079	0.00109473	5.40238e-05	0.000866369	0.00263882	0.000101644	0.000352367	0.037813
CTCCCAATCAAAGAAC_1	0.00304586	0.0245032	0.065636	0.00143572	0.0107206	0.882609	0.0112501	0.000798986
CTCCCAATCGTCACCT_1	0.00557659	0.0982602	0.183035	0.00083625	0.0956472	0.574765	0.033781	0.00809911
CTCCGATAGAATTGTG_1	0.0820898	0.101871	0.0515838	0.0035721	0.0158875	0.724889	0.0144414	0.00566518
CTCCTCCAGGCTCACC_1	0.666587	0.330267	0.000418185	0.00153151	0.00012074	0.000248249	0.000448565	0.000378686
CTCCTCCCACGCCACA_1	0.00964321	0.0343713	0.0587788	0.0193477	0.288642	0.393312	0.189157	0.00674857
CTCCTCCCAGTGTGCC_1	0.0305207	0.0771523	0.0707164	0.0168007	0.0397257	0.729504	0.0231411	0.012439
CTCCTCCGTTCCCACT_1	0.00974079	0.014775	0.0404011	0.0276819	0.747359	0.0517388	0.104884	0.00341934
CTCCTCCTCCGAGAAG_1	0.118284	0.511436	0.0478746	0.0074076	0.0645986	0.0712882	0.107614	0.0714973
CTCCTTTAGGATGCGT_1	0.381163	0.516919	0.0115696	0.00785647	0.0317863	0.0198624	0.0142182	0.0166247
CTCCTTTTCTGCTCTG_1	0.0214752	0.0515805	0.0359158	0.321494	0.398175	0.130251	0.0324814	0.00862694
CTCGAGGAGTCCTGCG_1	0.00170726	0.0101044	0.157548	0.00446556	0.696067	0.110535	0.018605	0.00096843
CTCTCAGAGGCCCAAA_1	0.00739055	0.0145629	0.270123	0.0217482	0.381468	0.111804	0.165462	0.0274406
CTCTCAGTCGAACGCC_1	0.191141	0.632118	0.0102695	0.00533173	0.0119213	0.00521605	0.00620035	0.137802
CTCTCGAAGTTTCTTC_1	0.0626512	0.0728355	0.651216	0.0035221	0.0537957	0.126761	0.00797662	0.0212417
CTGAATGAGCTTTGTG_1	0.0267285	0.260179	0.457673	0.0055914	0.0678709	0.13129	0.0462822	0.0043844
CTGAATGCACATGTTG_1	0.00735238	0.00524785	0.0320242	0.0715106	0.869159	0.00557608	0.00602695	0.00310267
CTGAATGCACCCTAAA_1	0.0206071	0.057796	0.183354	0.211042	0.457576	0.0508871	0.0136069	0.00513118
CTGAATGTCGGCTATA_1	0.00899804	0.00131365	0.0011666	0.841822	0.0842367	0.0509856	0.00862068	0.00285672
CTGAGCGAGGAGCTGT_1	0.184228	0.392517	0.0448798	0.0129508	0.188811	0.0763666	0.0782893	0.0219573
CTGAGCGTCCACTTTA_1	0.0153479	0.335283	0.0671652	0.00790504	0.231338	0.13443	0.204398	0.004133
CTGAGGCCAACGAGGT_1	0.147887	0.831305	0.00219225	0.00278897	0.00485193	0.00159076	0.0037185	0.00566598
CTGAGGCCACGGTGCT_1	0.0433456	0.0233321	0.102038	0.0953032	0.447574	0.0386969	0.0796483	0.170061
CTGAGGCTCATCGCAA_1	0.121113	0.760532	0.0379965	0.0126805	0.03796	0.0193716	0.00815895	0.00218758
CTGATCCCACACACGC_1	0.00779364	0.0163865	0.284005	0.0382826	0.542432	0.0879819	0.0184018	0.00471683
CTGATCCTCGGTCGGT_1	0.00982709	0.0283407	0.0224088	0.00257949	0.0637197	0.667311	0.199011	0.00680251
CTGCAGGCACATACGT_1	0.00508252	0.0974018	0.46092	0.0156141	0.0452704	0.354233	0.0195874	0.00189079
CTGCAGGGTTGCTCCT_1	0.0022158	0.0126771	0.466773	0.00383438	0.255982	0.244562	0.0130486	0.0009077
CTGCAGGTCCGAGCTG_1	0.0260199	0.0233694	0.0125149	0.267246	0.41725	0.0500338	0.0362218	0.167344
CTGCATCGTATTGCCA_1	0.0121991	0.0245654	0.286104	0.00187228	0.0991403	0.499485	0.0679026	0.00873138
CTGCATCGTTAAACAG_1	0.0553876	0.192933	0.0536517	0.00465799	0.526672	0.0834897	0.0737578	0.00944965
CTGCCATAGCCAGAGT_1	0.0253756	0.152165	0.197292	0.164222	0.351005	0.0963101	0.00924301	0.00438686
CTGCCTAAGCCATCCG_1	0.0115331	0.153251	0.0325768	0.0205868	0.410254	0.257594	0.109843	0.00436086
CTGCCTACACAACGTT_1	0.0216344	0.0154336	0.0678157	0.0282207	0.15381	0.670668	0.0332683	0.00914916
CTGCCTACATCATTGG_1	0.00454651	0.0125988	0.258306	0.0191113	0.244304	0.416976	0.0409646	0.00319216
CTGCGAGGTAGTGGCA_1	0.0161847	0.0235343	0.0581103	0.04333	0.552492	0.0813782	0.219335	0.00563515
CTGCTCAAGCACTCTA_1	0.027296	0.0072687	0.025876	0.449193	0.340071	0.0313364	0.0244764	0.0944822
CTGGACGAGCCTGCCA_1	0.00267608	0.0236358	0.688699	0.000532408	0.157432	0.106949	0.0184267	0.00165013
CTGGACGAGTCTGGTT_1	0.156847	0.764637	0.0287219	0.00531224	0.0127479	0.00693267	0.00613448	0.0186673
CTGGACGCATACTGAC_1	0.035716	0.639827	0.244059	0.00699596	0.0493311	0.0173689	0.00328777	0.00341424
CTGGACGTCTTCTTCC_1	0.0336594	0.03032	0.0440114	0.03061	0.751971	0.059979	0.0463911	0.00305824
CTGGCAGTCTCTCGAC_1	0.00377294	0.0364054	0.547592	0.00067087	0.187403	0.193131	0.0202357	0.0107895
CTGGTCTAGCTGGCTC_1	0.13456	0.168059	0.168685	0.0131374	0.217868	0.241497	0.0482804	0.00791353
CTGGTCTCACGTCGTG_1	0.00191825	0.0320063	0.412596	0.00636707	0.0630046	0.42737	0.0531352	0.00360219
CTGGTCTCATGAAGCG_1	0.030432	0.0941006	0.464571	0.00669856	0.138152	0.201732	0.0336096	0.0307042
CTGGTCTCATTCGGGC_1	0.0132523	0.0187032	0.0462309	0.00695005	0.191428	0.254513	0.446307	0.0226159
CTGGTCTGTCCGAAGA_1	0.015192	0.0967646	0.757704	0.00242542	0.10853	0.0138022	0.00382598	0.00175547
CTGGTCTGTCGCATCG_1	0.0285762	0.0153181	0.30517	0.0114338	0.477779	0.086601	0.0585916	0.0165301
CTGTACCAGCGAGTAC_1	0.0321457	0.148373	0.0191768	0.0194151	0.652603	0.0111486	0.0949678	0.0221707
CTGTACCCATCGCTGG_1	0.0427252	0.0532313	0.404863	0.0545808	0.199433	0.148604	0.029921	0.066642
CTGTAGACAATACCCA_1	0.01999	0.0342582	0.15556	0.0137601	0.718338	0.0449724	0.0103319	0.00279016
CTGTAGATCTCTGCCA_1	0.00286424	0.00293851	0.0162289	0.00340668	0.883327	0.0507912	0.0368688	0.00357458
CTGTATTCACAGAAGC_1	0.114898	0.795249	0.0191758	0.0135369	0.00808863	0.00581093	0.00245411	0.0407864
CTGTATTGTTGGAGGT_1	0.00311988	0.00650641	0.0794222	0.00495919	0.0655589	0.834507	0.00468821	0.00123829
CTGTCGTCACAGCCAC_1	0.00494325	0.122493	0.382263	0.00540302	0.169589	0.0836774	0.218344	0.0132869
CTGTGAACAAGAAACT_1	0.00339099	0.0244689	0.14271	0.00156719	0.12881	0.674543	0.0194299	0.00507979
CTGTGAAGTTCACCGG_1	0.00155531	0.0374222	0.748585	0.00300067	0.128285	0.0539349	0.0260423	0.00117408
CTGTGGGAGTTTCAGC_1	0.0636432	0.0300691	0.0566225	0.0259223	0.238137	0.238735	0.336199	0.0106722
CTGTGGGCAAAGGGCT_1	0.0281715	0.023476	0.0179901	0.459477	0.223153	0.0494812	0.150507	0.0477437
CTGTGGGTCAAGAGGC_1	0.0376262	0.769116	0.032079	0.00145217	0.00296318	0.148425	0.00681067	0.00152825
CTGTGGGTCCGAAGGA_1	0.0773399	0.100122	0.426552	0.00314966	0.0985166	0.22497	0.0414786	0.0278714
CTTACCGAGCACGTCC_1	0.00360045	0.1138	0.690796	0.002965	0.0702609	0.106707	0.0104248	0.00144564
CTTACCGTCTGCGGAC_1	0.0160356	0.821152	0.0657217	0.00984419	0.0320078	0.0446817	0.00496915	0.00558818
CTTAGGAGTAGTGATA_1	0.0138001	0.000562568	0.000224896	0.00301161	0.11996	0.000523826	0.809727	0.05219
CTTAGGAGTGCATTAC_1	0.0153006	0.493557	0.15935	0.010993	0.00443398	0.306107	0.00569419	0.00456496
CTTCAATCACTGCGAC_1	0.0342189	0.408706	0.176008	0.0142522	0.114001	0.18729	0.0636007	0.00192239
CTTCAATGTAGGATAT_1	0.0163395	0.221884	0.119789	0.193626	0.340248	0.0207269	0.0699843	0.0174037
CTTCCGAAGCCACAAG_1	0.068608	0.0774012	0.0516976	0.0150931	0.0990261	0.0402649	0.543655	0.104254
CTTCCGAAGTCTGGAG_1	0.0681113	0.252124	0.0361427	0.00955299	0.0645755	0.17946	0.285119	0.104914
CTTCCGACAGAACCGA_1	0.0125692	0.0328326	0.0949067	0.0786183	0.533502	0.154755	0.0788192	0.0139971
CTTCGGTAGATTGTGA_1	0.000857811	0.000957418	0.00222258	0.000581468	0.00406728	0.000944758	0.0917767	0.898592
CTTCGGTCAAGTGACG_1	0.00522136	0.00569278	0.0430569	0.00958012	0.698936	0.184658	0.0423772	0.010478
CTTCGGTCACACCAGC_1	0.0656517	0.220756	0.365736	0.00833724	0.0234381	0.297212	0.0123513	0.00651661
CTTCTAACAGACACCC_1	0.123027	0.0767764	0.030243	0.0142318	0.0425381	0.602976	0.0207387	0.0894696
CTTCTCTAGTGCAAAT_1	0.0128035	0.0157863	0.161385	0.0019423	0.638042	0.133643	0.0341962	0.00220282
CTTCTCTGTAGGTACG_1	0.0082964	0.0252447	0.163881	0.0280732	0.585745	0.0731557	0.107621	0.00798337
CTTGAGACACCAGCCA_1	0.00132895	0.00117244	0.000353285	0.00692782	0.976176	0.00156356	0.00862385	0.00385365
CTTGAGATCATCGGGC_1	0.0328967	0.0341906	0.0321548	0.550972	0.269786	0.0363942	0.0328414	0.010765
CTTGAGATCTCGCTCA_1	0.00413784	0.0231751	0.651808	0.00607349	0.27217	0.0351567	0.00544821	0.00203078
CTTGATTAGATGAATC_1	0.0225222	0.018013	0.19578	0.0333309	0.499924	0.209101	0.0154115	0.00591762
CTTTCAATCGACGCTG_1	0.00904515	0.0226732	0.908698	0.000899431	0.0212552	0.0307794	0.00617202	0.000477243
CTTTCGGCATGATGCT_1	0.0147893	0.00833148	0.0325788	0.258435	0.627717	0.0312276	0.0182633	0.00865783
CTTTCGGGTAGTCACT_1	0.130786	0.119788	0.0332601	0.0972007	0.113735	0.0234492	0.466523	0.0152575
CTTTCGGGTTTGTTGG_1	0.0789552	0.0140529	0.0258737	0.00439358	0.626048	0.14186	0.0135551	0.0952616
CTTTCGGTCAGTCACA_1	0.321167	0.150622	0.0203727	0.102809	0.0593522	0.0191763	0.0100431	0.316458
GAAACCTCAAGGCGTA_1	0.0919044	0.0133566	0.010407	0.0920174	0.328568	0.235366	0.149904	0.0784767
GAAACCTCAGCATACT_1	0.0108837	0.00611008	0.0391417	0.00328976	0.0587931	0.791114	0.0695537	0.0211142
GAAATGACAAATTGCC_1	0.109465	0.091992	0.0138851	0.000318754	0.00357986	0.767351	0.0100388	0.00336964
GAAATGAGTTTGGAGG_1	0.0244223	0.193116	0.148033	0.00309989	0.141403	0.452911	0.0269782	0.0100356
GAACACTAGGTTATAG_1	0.00198753	0.00734467	0.948149	0.0015037	0.00749065	0.0108826	0.00863763	0.0140041
GAACACTCATGGATCT_1	0.0157157	0.000508751	0.000144113	0.00117565	0.909971	0.000384787	0.0124491	0.0596507
GAACGTTTCGTAATGC_1	0.888288	0.0825764	0.00080926	0.000637025	0.000264292	0.00366128	0.000709112	0.0230546
GAACTGTAGGTAAACT_1	0.0464935	0.147434	0.10381	0.450492	0.143745	0.0402024	0.033082	0.0347407
GAACTGTCACCGTGAC_1	0.011783	0.941253	0.0139846	0.00085573	0.00836606	0.0182395	0.00319072	0.00232742
GAAGAATCAGCTATAC_1	0.000825716	0.00132267	0.19244	7.93954e-05	0.00398845	0.799423	0.00160587	0.000314035
GAAGCCCGTGGCTGAA_1	0.0170301	0.066505	0.132935	0.100127	0.547961	0.0714487	0.0548207	0.00917305
GAAGCCCTCTCCACTG_1	0.0034482	0.0124593	0.62082	0.00246321	0.157079	0.140431	0.0206402	0.0426587
GAAGCGACAGGACGAT_1	0.00811732	0.0208042	0.0651096	0.0542436	0.590405	0.188459	0.0652893	0.00757141
GAAGGACCAAAGCTCT_1	0.0169849	0.0319945	0.00349394	0.625957	0.292354	0.0121892	0.0156364	0.00138962
GAAGGGTTCGCTCTCA_1	0.0291165	0.18811	0.13863	0.00433482	0.309658	0.241689	0.0745403	0.0139212
GAAGTAAAGAAGCGCT_1	0.147497	0.12119	0.226624	0.103929	0.212604	0.112693	0.0196784	0.0557852
GAAGTAACAGCCGTTG_1	0.785675	0.0296896	0.0253292	0.000612165	0.0111948	0.137335	0.00730807	0.00285664
GAAGTAATCTCTCTTC_1	0.204461	0.0833811	0.0283165	0.00256636	0.00992218	0.660078	0.00358358	0.00769109
GAATAGAAGAATGTTG_1	0.00718369	0.17058	0.311279	0.0818776	0.102073	0.282828	0.0400137	0.00416532
GAATAGAGTGATAGTA_1	0.534256	0.456468	0.00167206	0.000473337	0.000850931	0.00404794	0.000438807	0.0017924
GAATCACTCATGGAGG_1	0.0056177	0.0225755	0.0537896	0.00657621	0.46479	0.345226	0.0923608	0.00906446
GACACGCGTTGACTAC_1	0.0273261	0.11556	0.0383084	0.00158033	0.0336277	0.766605	0.0155341	0.00145743
GACAGCCCACGGCGTT_1	0.00239172	0.00506766	0.027472	0.00386043	0.25604	0.66957	0.0347346	0.000862955
GACAGCCGTCAGTCTA_1	0.00912423	0.0200766	0.131309	0.00125787	0.0355779	0.70506	0.0414293	0.0561652
GACAGCCTCTCGCAGG_1	0.00362938	0.575293	0.0755136	0.00248722	0.197558	0.016377	0.114788	0.0143539
GACATCATCTGCTTAT_1	0.00343709	0.00235377	0.00152751	0.00342646	0.50933	0.00444843	0.464755	0.0107223
GACCCAGCAGACATCT_1	0.0262263	0.0248819	0.0298414	0.0203558	0.0782953	0.0326297	0.22806	0.559709
GACCCTTCATTCGGGC_1	0.0024331	0.0160501	0.0821543	0.000471475	0.00870853	0.886146	0.00349678	0.000539626
GACCCTTGTGAGTTTC_1	0.480009	0.193757	0.00207074	0.00321062	0.00737031	0.281498	0.0253671	0.00671727
GACCCTTTCGCGTCGA_1	0.00872743	0.0886161	0.079568	0.00463762	0.326348	0.241227	0.246746	0.00412981
GACCGTGCACCTTCCA_1	0.00939349	0.114865	0.110938	0.00372229	0.0706612	0.105497	0.39111	0.193813
GACCGTGCATGAGGGT_1	0.00172949	0.0336098	0.676223	0.118275	0.104201	0.0281209	0.0364737	0.0013667
GACCGTGGTATCGAAA_1	0.0136542	0.0763623	0.399862	0.00665248	0.231101	0.245837	0.0217808	0.00475038
GACCTTCCATGCGTGC_1	0.0133847	0.00403483	0.00967969	0.00214724	0.600365	0.160423	0.199591	0.0103739
GACGCTGAGGTGGGTT_1	0.33709	0.517771	0.0344375	0.00323349	0.00827845	0.0676894	0.0259661	0.00553481
GACGTTAAGGAGCTGT_1	0.616903	0.0414633	0.0411643	0.0112345	0.143986	0.116165	0.0250293	0.00405485
GACGTTAAGTACCGGA_1	0.0163305	0.0299975	0.28967	0.0710652	0.174469	0.374461	0.0336627	0.010344
GACGTTATCGGCACTG_1	0.0182212	0.279979	0.0554284	0.00227161	0.167524	0.14043	0.320333	0.0158132
GACTATGAGCTATCCA_1	0.0227242	0.0343288	0.103084	0.0175401	0.367542	0.137857	0.222976	0.0939476
GACTATGTCTCTATAC_1	0.0892783	0.023546	0.0399917	0.335565	0.345188	0.0607252	0.0561519	0.0495544
GACTCTCAGCGTGTTT_1	0.164731	0.690358	0.0109748	0.00159081	0.00801807	0.105974	0.00570397	0.0126499
GACTCTCCAGGCACAA_1	0.0677909	0.160963	0.0229123	0.0330041	0.282004	0.321353	0.0995977	0.0123752
GACTCTCTCACTACTT_1	0.0358857	0.824636	0.0415057	0.0771238	0.0128388	0.0016322	0.00213272	0.00424545
GACTGATAGACTTCCA_1	0.00840484	0.0886468	0.122357	0.0275456	0.60701	0.101632	0.0250544	0.01935
GACTTCCTCTGGAAGG_1	0.00333408	0.0674793	0.263124	0.00120709	0.506245	0.0268755	0.126832	0.0049024
GAGAAATAGGTGAGCT_1	0.00172672	0.0227906	0.528581	0.00880731	0.223778	0.190551	0.0224321	0.00133395
GAGAAATGTAGAATAC_1	0.00280518	0.0346854	0.0416193	0.013122	0.102306	0.751061	0.0499759	0.00442614
GAGAAATTCAAGGAGC_1	0.0753375	0.067709	0.053254	0.035675	0.63732	0.0782867	0.0276484	0.0247698
GAGAAATTCGGATTAC_1	0.00773793	0.204539	0.0884948	0.00934939	0.324504	0.197616	0.164156	0.00360309
GAGACCCGTCTTAGTG_1	0.01916	0.0140947	0.00895062	0.73036	0.0683967	0.0190965	0.0893537	0.0505879
GAGACCCGTTGAGTCT_1	0.00239792	0.0403666	0.0904484	0.0237011	0.604281	0.148315	0.0885853	0.00190469
GAGACCCTCGAGTGGA_1	0.00467285	0.00481735	0.0805848	0.00529168	0.866499	0.0204275	0.0107677	0.00693907
GAGAGGTAGTGGAAAG_1	0.0227655	0.0889115	0.321145	0.00326317	0.0833259	0.402409	0.0449895	0.03319
GAGAGGTTCGCTCATC_1	0.787099	0.190606	0.000498684	0.000291929	0.00144649	0.000551286	0.00877433	0.0107325
GAGATGGGTGAAGCGT_1	0.174517	0.58013	0.164487	0.00829935	0.0123016	0.0569297	0.00184357	0.00149157
GAGATGGTCCTTATCA_1	0.107464	0.176011	0.125278	0.103839	0.170395	0.251727	0.0523801	0.0129062
GAGCCTGGTCGTGGTC_1	0.00117944	0.0129534	0.0108292	0.0138681	0.931998	0.00853852	0.0174879	0.00314576
GAGCTGCAGCCGAACA_1	0.0189911	0.0036334	0.00288706	0.00684089	0.442262	0.00965133	0.088003	0.427731
GAGCTGCCAGAGGCTA_1	0.0257029	0.0103226	0.00613972	0.0301305	0.619185	0.0356749	0.131599	0.141246
GAGCTGCGTACGCTAT_1	0.00109293	0.000106618	0.000450466	3.17629e-05	0.00256057	0.983945	0.00612027	0.00569247
GAGCTGCGTCGAATGG_1	0.0258759	0.105788	0.392579	0.00380927	0.14726	0.286019	0.0354188	0.00325041
GAGCTGCGTTCCCACT_1	0.0541072	0.195678	0.0790304	0.00279634	0.0494906	0.363084	0.0972584	0.158555
GAGGCAAGTGGCTGAA_1	0.0877489	0.0322987	0.00489103	0.00707961	0.367219	0.114739	0.331757	0.0542663
GAGGGTAAGATGTTGA_1	0.136827	0.143233	0.0301211	0.0104624	0.316161	0.185288	0.0850016	0.0929059
GAGGGTAAGGAGCTGT_1	0.0387479	0.0821889	0.0120346	0.420368	0.366854	0.0146074	0.0537197	0.0114802
GAGGGTAAGGCAGGGA_1	0.369847	0.582115	0.013949	0.00115755	0.00148607	0.0230328	0.00467191	0.00374143
GAGGGTAAGGTAAACT_1	0.0921591	0.879996	0.00462713	0.000520101	0.00162006	0.0176849	0.00230457	0.00108786
GAGGGTACATCGCCTT_1	0.0100401	0.0108007	0.387626	0.0017691	0.180572	0.396186	0.0106667	0.0023402
GAGGGTAGTCCTGGTG_1	0.0112062	0.200499	0.347779	0.00484843	0.245754	0.156704	0.0296848	0.00352506
GAGTCATTCCTCGATC_1	0.144078	0.00861258	0.00320999	0.0847454	0.0190111	0.00715264	0.365724	0.367466
GAGTCATTCTAGGCAT_1	0.00090857	0.00648154	0.344057	0.0162968	0.0908132	0.534024	0.00632576	0.00109265
GAGTCTAAGGACTAAT_1	0.0198774	0.312725	0.197586	0.085174	0.0419846	0.318047	0.0171026	0.00750292
GAGTCTAAGGTGATAT_1	0.00954725	0.00703687	0.0344735	0.379914	0.548064	0.016716	0.0035386	0.000709213
GAGTCTACACCGCTGA_1	0.00409045	0.152334	0.11289	0.016617	0.302917	0.173067	0.228605	0.0094798
GAGTCTATCCACATAG_1	0.00191171	0.0157391	0.539763	0.0300811	0.340189	0.0406597	0.0276154	0.00404069
GAGTGAGAGGCCTAGA_1	0.0155682	0.256511	0.461618	0.00668136	0.159283	0.0567156	0.0240207	0.0196017
GAGTGAGTCGCTAGCG_1	0.276734	0.125793	0.102508	0.00934736	0.0311117	0.409175	0.0343114	0.0110199
GAGTGTTAGTCATCGT_1	0.00477587	0.245369	0.547615	0.0298799	0.0218667	0.130075	0.0152969	0.00512125
GAGTTACAGACGGTTG_1	0.00567165	0.00158321	0.00343445	0.121789	0.844331	0.00636437	0.0104258	0.00639997
GAGTTACAGCATAGGC_1	0.141661	0.842127	0.000894276	0.000783133	0.00106578	0.0014948	0.00184472	0.0101294
GAGTTACTCAATCCGA_1	0.985788	0.000412275	3.0745e-05	0.000496021	0.000106086	4.66605e-05	7.76804e-05	0.0130428
GAGTTGTAGTCGCCAC_1	0.00301207	0.0133818	0.0267061	0.016982	0.0643665	0.679824	0.192645	0.00308234
GAGTTGTCAGAACTCT_1	0.00107525	0.000892864	0.00459509	0.00445932	0.768396	0.0824439	0.137286	0.000852047
GAGTTTGAGGATTTAG_1	0.0259997	0.112794	0.261527	0.0128898	0.530156	0.0431858	0.0110917	0.00235576
GAGTTTGCACAACATC_1	0.00876455	0.188868	0.299376	0.111644	0.274054	0.0517985	0.0585793	0.00691672
GAGTTTGGTAAGACCG_1	0.00687896	0.0491449	0.335214	0.00263829	0.130849	0.223678	0.216737	0.0348604
GAGTTTGGTGTCATCA_1	0.0146178	0.0117465	0.00589985	0.0536695	0.882868	0.00758482	0.0211163	0.00249703
GAGTTTGTCGAGGCAA_1	0.050856	0.284563	0.0901159	0.0157975	0.194577	0.0913468	0.166925	0.105819
GATAGCTCATTCTTCA_1	0.00544402	0.872384	0.0323344	0.0121249	0.0164822	0.0493401	0.00992341	0.00196669
GATCACACATCATCTT_1	0.0759292	0.131826	0.0573282	0.00266438	0.291867	0.24547	0.187665	0.00724976
GATCAGTCAAGAGTGC_1	0.000217356	0.00610438	0.964673	0.002969	0.0193525	0.0030358	0.0028166	0.000831773
GATCATGAGTTTGGCT_1	0.80395	0.180101	0.000926058	0.00055483	0.000609599	0.0118754	0.000493226	0.00148971
GATCATGTCCATGAGT_1	0.0649827	0.0300913	0.0293882	0.0961732	0.537185	0.109924	0.0992416	0.0330144
GATCCCTAGACTGAGC_1	0.00491762	0.0425932	0.607848	0.0383885	0.207964	0.0609547	0.03163	0.00570318
GATCCCTAGCACCAGA_1	0.0444862	0.0752806	0.0545798	0.0124286	0.24762	0.15893	0.173306	0.233369
GATCCCTGTACCGTCG_1	0.00437951	0.0151207	0.0852421	0.0174182	0.657446	0.138938	0.080085	0.00137041
GATCCCTGTGCCTGCA_1	0.0169014	0.0068768	0.0253606	0.00286327	0.0635853	0.08029	0.802134	0.00198875
GATCCCTTCAGTAGGG_1	0.000718537	0.000227526	0.0055201	0.000642648	0.982384	0.00335952	0.00597341	0.00117448
GATCGTAAGAGTAACT_1	0.443193	0.39593	0.0277811	0.0367821	0.04734	0.0293889	0.0174272	0.00215686
GATGACTCATCCTTGC_1	0.101661	0.170537	0.0329003	0.122995	0.454208	0.0213767	0.0277604	0.0685613
GATGACTTCTAACACG_1	0.126417	0.223496	0.0328862	0.0177977	0.341408	0.209783	0.0426399	0.00557219
GATGATCAGTGATAAC_1	0.0309742	0.00645513	0.00178319	0.916408	0.0304546	0.00434324	0.00664824	0.0029333
GATGATCCAGCCCAGT_1	0.664061	0.157178	0.0131013	0.00880648	0.0120296	0.131996	0.00668958	0.00613811
GATGATCTCGACGATT_1	0.0206076	0.0237812	0.0632567	0.190162	0.595931	0.0375312	0.0441632	0.0245667
GATGCTATCTCTTAAC_1	0.0089088	0.00276145	0.00235477	0.618451	0.247057	0.0105701	0.0197002	0.0901973
GATGGAGAGATAGTCA_1	0.0153678	0.193546	0.198484	0.00694802	0.0598011	0.467054	0.0438075	0.0149917
GATGGAGAGCGTTCAT_1	0.0480235	0.0616261	0.0324368	0.0521417	0.309075	0.275359	0.21305	0.00828863
GATGGAGCACTCCCTA_1	0.00784317	0.00239341	0.00253027	0.0469484	0.751971	0.00746254	0.130122	0.0507295
GATGTTGTCAGAATAG_1	0.00598592	0.0285453	0.332244	0.000819492	0.0427531	0.567838	0.0154708	0.00634308
GATTCGAGTCGCTTGG_1	0.995876	0.00223313	3.2606e-06	0.000176565	7.67327e-05	1.10195e-05	4.82458e-05	0.00157466
GATTCGATCCACAGGC_1	0.0087851	0.0101628	0.0455171	0.0225622	0.0100502	0.533412	0.0467977	0.322713
GATTCGATCTGGCTGG_1	0.00263254	0.0227738	0.295289	0.159291	0.348964	0.11402	0.0543641	0.00266568
GATTCTTGTCCGGCAT_1	0.00773532	0.0424354	0.239237	0.0102323	0.341911	0.282023	0.0726948	0.00373128
GATTCTTGTCTTACAG_1	0.0481207	0.0932912	0.0761841	0.0496365	0.243565	0.470133	0.014988	0.00408127
GATTCTTGTTGTGCAT_1	0.999867	3.90366e-05	2.80986e-08	2.5058e-05	1.41836e-06	4.12103e-06	3.92744e-07	6.25195e-05
GATTCTTTCAGCCTTC_1	0.0153326	0.0789548	0.0872998	0.0955048	0.639068	0.0566084	0.017446	0.0097855
GATTGGTAGAAATTCG_1	0.292953	0.0344063	0.01919	0.0271592	0.0171205	0.520362	0.0669753	0.0218345
GATTGGTAGTGTACCT_1	0.0856952	0.047393	0.058011	0.206929	0.148387	0.389745	0.036371	0.0274693
GATTGGTAGTTGGACG_1	0.00722444	0.0323921	0.099832	0.00580242	0.0249819	0.820955	0.00731183	0.00150077
GATTGGTCATCGCTCT_1	0.00766929	0.0187383	0.019404	0.00137141	0.0293218	0.903932	0.0172608	0.0023029
GATTGGTGTTAACCTG_1	0.705535	0.037225	0.00168569	0.00254993	0.00646497	0.0147919	0.0331465	0.198601
GATTGGTTCAAGGTGG_1	0.00353615	0.025756	0.143224	0.00122564	0.106291	0.623084	0.0946432	0.00223975
GATTTCTGTAGTCGGA_1	0.00411724	0.00640185	0.0224376	0.0606607	0.76404	0.10229	0.0312464	0.0088064
GCAACATGTGTTAAAG_1	0.18287	0.780335	0.00789086	0.000537273	0.00866943	0.00711847	0.00259664	0.00998236
GCAACCGAGAGCAGTC_1	0.0330682	0.00667427	0.00567616	0.26051	0.501672	0.0123023	0.0361646	0.143932
GCAACCGCAACTAGAA_1	0.117259	0.878072	0.000636261	0.000579043	0.00115054	0.00027072	0.000398262	0.00163485
GCAACCGCACAACGCC_1	0.0279348	0.553405	0.0898336	0.00738518	0.134596	0.130388	0.0478716	0.00858639
GCACATACACGCGTGT_1	0.219717	0.520876	0.014797	0.130466	0.0659964	0.0116209	0.0197188	0.0168084
GCACATAGTCTTCATT_1	0.0106022	0.0284151	0.0364621	0.234066	0.259794	0.109278	0.303882	0.0174997
GCACATATCCAGTGCG_1	0.016863	0.0214579	0.0269854	0.00468012	0.158319	0.514867	0.240343	0.0164837
GCACATATCGTGCATA_1	0.497542	0.36605	0.00301028	0.00219925	0.00807493	0.100383	0.0161943	0.00654701
GCACGGTCACAAGCAG_1	0.0106112	0.292256	0.113678	0.00563711	0.0208096	0.538555	0.0119734	0.00648034
GCACGGTTCTAAGAAG_1	0.0431361	0.0737913	0.111519	0.200822	0.473679	0.0687906	0.0185161	0.00974641
GCACGTGCAATGCAAA_1	0.04383	0.432964	0.143449	0.00833214	0.0305733	0.251013	0.0563083	0.0335307
GCACGTGGTAGTCTTG_1	0.00418726	0.0403661	0.0895804	0.0680046	0.711731	0.0479814	0.0253618	0.012788
GCACTAACAATTTCGG_1	0.00245811	0.0984266	0.768123	0.0024858	0.0764856	0.0441927	0.00702153	0.000806237
GCACTAACATCCGAAT_1	0.25302	0.0834118	0.0290342	0.00704325	0.0409598	0.108601	0.318436	0.159494
GCACTAAGTGCCTATA_1	0.053797	0.6539	0.105896	0.0184924	0.0406529	0.0806002	0.0188494	0.027812
GCACTAATCGTGCTCT_1	0.0896597	0.862998	0.0265057	0.000663768	0.00984148	0.00497543	0.00161229	0.00374403
GCACTAATCTGGGCAC_1	0.229759	0.529315	0.0408962	0.0175543	0.0467549	0.0790854	0.0369018	0.0197337
GCAGCCACATGGCTGC_1	0.000723419	0.00011921	0.000126829	0.000137626	0.286812	0.00015673	0.0321783	0.679745
GCAGCTGAGGTGCAGT_1	0.00179648	0.0184963	0.214426	0.00787671	0.509845	0.035668	0.207198	0.00469306
GCAGCTGAGTTAACGA_1	0.431605	0.00244754	0.000551176	0.0010971	0.00108135	0.509762	0.00100952	0.0524466
GCAGCTGGTGTAGGAC_1	0.0138455	0.0315272	0.0417867	0.0343623	0.310939	0.414431	0.145775	0.00733245
GCAGCTGTCAAGAGTA_1	0.933983	0.0520637	0.000212058	0.000129128	0.000262194	0.00254785	0.00819103	0.00261109
GCAGGCTAGATAGCAT_1	0.0429828	0.179273	0.0493197	0.351699	0.0608537	0.208395	0.0821454	0.0253314
GCAGGCTCACCAGTTA_1	0.0016594	0.0038354	0.942741	0.00136305	0.0364918	0.00469713	0.00536395	0.00384835
GCAGGCTGTAAGGCTG_1	0.0183585	0.11239	0.443836	0.0068237	0.0624821	0.0832341	0.0551266	0.217749
GCAGGCTGTCGAATGG_1	0.0128921	0.0868934	0.439563	0.0477149	0.346711	0.0197481	0.0315552	0.0149226
GCAGTTAGTCGCATTA_1	0.015296	0.0100094	0.0137471	0.148617	0.73591	0.0381144	0.013429	0.0248768
GCAGTTATCAGCCTCT_1	0.010645	0.0777212	0.120993	0.00502213	0.495685	0.247655	0.0388563	0.00342256
GCAGTTATCCAGGACC_1	0.0915984	0.112383	0.0233938	0.00188862	0.0162183	0.735164	0.0126405	0.00671363
GCATCGGTCAACACCA_1	0.00479176	0.0761656	0.49536	0.00789055	0.256931	0.139312	0.0172794	0.00226934
GCATCTCCAGTAACAA_1	0.187848	0.370308	0.0434113	0.285223	0.0806529	0.0111323	0.0103144	0.0111107
GCATCTCGTCACTTAG_1	0.718995	0.249731	0.00152179	0.0035223	0.00452112	0.016569	0.00213229	0.00300724
GCATCTCTCGCAGAGA_1	0.00406836	0.00909453	0.275849	0.0113535	0.307308	0.376066	0.0146351	0.00162599
GCATGATAGACATAGT_1	0.0554641	0.0737752	0.0402575	0.12783	0.349031	0.275494	0.0729755	0.00517318
GCATTAGAGAAGATCT_1	0.930155	0.0631688	0.000196132	0.000254127	0.000353823	0.00102157	0.00170708	0.0031435
GCCAACGAGGCCCGTT_1	0.0248376	0.137238	0.266547	0.149905	0.282655	0.0900338	0.0271392	0.0216446
GCCAGCATCCAAATGC_1	0.0278667	0.00507172	0.0292347	0.00240444	0.731069	0.0521269	0.15036	0.00186704
GCCAGGTAGGTAGCCA_1	0.00068938	0.000458729	0.00303347	0.00537537	0.968484	0.00521116	0.0164806	0.000267275
GCCAGGTGTTTGACAC_1	0.92713	0.000190113	6.64436e-06	7.42325e-05	5.89608e-05	2.72855e-05	9.03152e-05	0.0724225
GCCAGGTTCGCCTAGG_1	0.00505413	0.0257246	0.359225	0.0042929	0.0880548	0.236463	0.27256	0.00862533
GCCAGTGAGCCGGATA_1	0.0156793	0.0208257	0.006369	0.766477	0.0889778	0.0192708	0.0472582	0.0351421
GCCAGTGTCCCAATAG_1	0.00917443	0.0385778	0.261119	0.105667	0.532092	0.0230185	0.00551429	0.024837
GCCATTCCACAAAGTA_1	0.00646491	0.015602	0.0137901	0.00547392	0.454912	0.0717505	0.360989	0.0710177
GCCATTCGTAGCTGTT_1	0.0380344	0.0476936	0.0711664	0.00329616	0.313327	0.394194	0.12041	0.0118783
GCCATTCTCCTCGCAT_1	0.00178205	0.0218981	0.0115779	0.00151167	0.259026	0.036055	0.641381	0.0267682
GCCCAGAAGGGTAGCT_1	0.00549904	0.00565165	0.00748944	0.390487	0.434338	0.111885	0.0302059	0.0144442
GCCCGAACAAGGCCTC_1	0.73276	0.169608	0.00166499	0.000920257	0.00503344	0.0605907	0.0258802	0.00354268
GCCCGAACAGTTTCGA_1	0.0451008	0.0275444	0.0309372	0.311038	0.123031	0.0811331	0.0767428	0.304473
GCCCGAAGTGTGCTTA_1	0.0334268	0.228262	0.159111	0.00827346	0.47427	0.0653653	0.0217472	0.00954477
GCCGATGAGCGACCCT_1	0.00504739	0.0653592	0.315216	0.0149233	0.513942	0.0561866	0.0277704	0.00155452
GCCGATGAGTAGGGTC_1	0.363693	0.59423	0.00417093	0.0047574	0.00596594	0.0244028	0.00157754	0.00120286
GCCGATGAGTGATAAC_1	0.466768	0.243076	0.0485068	0.00228676	0.0043712	0.227902	0.00446809	0.00262055
GCCGATGGTTTACGAC_1	0.0153607	0.934494	0.00589741	0.00260659	0.00978022	0.00869564	0.0139584	0.0092066
GCCGTGAAGTTGCTCA_1	0.207448	0.0831749	0.0992083	0.0358749	0.318677	0.140086	0.0651974	0.0503341
GCCTGTTAGCATCCTA_1	0.0627496	0.906973	0.0141347	0.000663858	0.00489579	0.00846054	0.000730528	0.00139242
GCCTGTTAGGGTAGCT_1	0.00239814	0.0136846	0.0228847	0.0116365	0.312429	0.0496817	0.580617	0.00666784
GCCTGTTCATATCTGG_1	0.00465455	0.0166927	0.677137	0.0099827	0.123994	0.119558	0.0466473	0.00133367
GCCTGTTTCAGACCGC_1	0.02333	0.00771178	0.692327	0.00433679	0.00921764	0.209285	0.0136933	0.0400979
GCGAGAAAGTAGAGTT_1	0.00443608	0.0257702	0.0219407	0.00737446	0.135651	0.669544	0.130883	0.00440039
GCGAGAACAATGTCAC_1	0.0197733	0.972266	0.0041238	0.000298238	0.000572764	0.00204521	0.000730542	0.00019006
GCGAGAAGTAATGATG_1	0.00694474	0.0237569	0.0337827	0.221854	0.111844	0.0267683	0.00545119	0.569598
GCGAGAAGTGACAGCA_1	0.00130918	0.00398111	0.147052	0.00403509	0.795486	0.0241802	0.0211781	0.00277857
GCGATCGTCGAGAAAT_1	0.0060077	0.00267519	0.0124372	0.0185549	0.712427	0.147763	0.0869772	0.0131578
GCGATCGTCGATGGAG_1	0.0629372	0.871746	0.0185997	0.000994904	0.013685	0.0217115	0.00419358	0.00613185
GCGGATCGTAGCGCTC_1	0.00328841	0.988342	0.001447	0.000205576	0.000641343	0.00138317	0.00263882	0.00205385
GCGGATCTCGCATTGA_1	0.014902	0.0904221	0.158093	0.139658	0.108813	0.231375	0.0298515	0.226886
GCGGATCTCTCATGCC_1	0.812483	0.00144102	0.000640485	0.000760385	0.0345372	0.00873134	0.0789878	0.0624187
GCGTGCACAACCGATT_1	0.00915472	0.209536	0.435284	0.0215035	0.304844	0.0105269	0.00542571	0.003725
GCGTGCACAGAGAGGG_1	0.0130962	0.055928	0.0313249	0.191903	0.594374	0.0549611	0.0540513	0.00436212
GCGTTTCTCGACGACC_1	0.0275601	0.0549656	0.0668785	0.0106449	0.366511	0.181216	0.265227	0.0269969
GCTACAAAGATCGCCC_1	0.0284019	0.0617997	0.0909451	0.0840816	0.303411	0.0932987	0.286306	0.0517555
GCTACAAGTCGCGGTT_1	0.00749563	0.0134704	0.0345332	0.00164383	0.0182435	0.890915	0.0276787	0.00602013
GCTACAATCGTCAACA_1	0.172627	0.817838	0.0017406	0.00134537	0.00226721	0.00149314	0.00205029	0.00063791
GCTACCTGTGTTGCCG_1	0.101754	0.0211583	0.012966	0.182786	0.451426	0.0774989	0.138098	0.0143129
GCTACCTGTTTGGAAA_1	0.00751486	0.0119464	0.710089	0.00211287	0.12687	0.104974	0.030715	0.00577882
GCTACCTTCCGATCGG_1	0.0558453	0.0590093	0.157769	0.0164568	0.0633425	0.605508	0.0399187	0.00215036
GCTCAAAAGAGGGTGG_1	0.0189043	0.149976	0.0143322	0.0622693	0.641871	0.0596634	0.0510878	0.00189552
GCTCAAACAACTGCCG_1	0.00431449	0.240961	0.249241	0.00102139	0.0272285	0.440014	0.0305673	0.00665272
GCTCAAATCCGGTAAT_1	0.0402148	0.196732	0.0234048	0.117965	0.50196	0.053898	0.0384407	0.027385
GCTGAATAGGTCCCTG_1	0.0200123	0.189747	0.140097	0.00662923	0.0825554	0.425292	0.12519	0.0104768
GCTGCAGAGGGTGAGG_1	0.0645852	0.053452	0.136273	0.0164304	0.611098	0.0540911	0.0346413	0.0294293
GCTGCAGCATCCCACT_1	0.00118981	0.000793049	0.00214989	0.0161299	0.962017	0.0031198	0.0138501	0.000750191
GCTGCAGTCCAACCAA_1	0.000556356	0.000256332	0.00022789	0.000725039	0.0199816	0.00188387	0.0043814	0.971987
GCTGCAGTCTCGCAGG_1	0.00306616	0.00458184	0.0171414	0.00138676	0.735673	0.00751725	0.220676	0.00995804
GCTGCAGTCTGCGGAC_1	0.107754	0.866566	0.0027477	0.00451211	0.001249	0.0142617	0.00104807	0.00186134
GCTGGGTTCCCAAGTA_1	0.00388507	0.0506202	0.191954	0.00283864	0.110601	0.626116	0.0109175	0.00306729
GCTTGGGGTATCGTAC_1	0.00413448	0.0090126	0.0445617	0.599577	0.192003	0.138595	0.0115653	0.000550722
GCTTGGGGTCAGACGA_1	0.00875057	0.249139	0.139529	0.0444617	0.321418	0.187964	0.0406652	0.00807319
GCTTTCGCAGGCGATA_1	0.00971299	0.0209225	0.552567	0.00681939	0.374619	0.0119266	0.0204423	0.00299013
GCTTTCGGTGTATTCG_1	0.562737	0.203778	0.0411069	0.00391157	0.0497241	0.028537	0.0665238	0.0436818
GCTTTCGGTTGCCGAC_1	0.00254113	0.0139832	0.085925	0.00515395	0.786879	0.0224125	0.054786	0.0283189
GGAACCCAGCGCCATC_1	0.00502418	0.0456287	0.0801652	0.0142262	0.740732	0.0584946	0.0475366	0.00819216
GGAAGTGCAACGGCTC_1	0.0375377	0.151841	0.148837	0.00553644	0.0535516	0.575661	0.0244981	0.00253702
GGAAGTGTCACGAGGA_1	0.00203523	0.0278772	0.878265	0.000437752	0.040612	0.0442355	0.00428651	0.00225131
GGAATCTGTCTAATCG_1	0.0198871	0.131136	0.475596	0.00990645	0.315462	0.0368781	0.00611551	0.00501945
GGAATCTTCACTCCGT_1	0.00302726	0.000952482	0.000765842	0.00570399	0.585916	0.00367956	0.043469	0.356486
GGAATCTTCCGGCAGT_1	0.79074	0.115659	0.00832805	0.00336278	0.00309387	0.0585257	0.0111666	0.00912401
GGAATCTTCTTCGCTG_1	0.331234	0.114056	0.0216296	0.0533604	0.236074	0.116339	0.120532	0.006775
GGAATGGAGAGGCGTT_1	0.105149	0.0587886	0.0263516	0.00744178	0.138588	0.0409247	0.121134	0.501622
GGAATGGTCCGTGACG_1	0.0866558	0.057784	0.216988	0.0296584	0.452932	0.079146	0.0717135	0.00512241
GGACGTCAGAGAGTGA_1	0.0379706	0.511905	0.418157	0.00338241	0.00559336	0.0199239	0.00155256	0.0015147
GGACGTCAGCCGATTT_1	0.0291298	0.00580839	0.0321422	0.00103476	0.0514791	0.833465	0.0118655	0.0350747
GGACGTCAGTTCGCAT_1	0.0259379	0.29326	0.310234	0.00678641	0.116409	0.195079	0.0504156	0.00187763
GGACGTCCAGCGTATT_1	0.0980957	0.336026	0.0725011	0.0178742	0.119094	0.178338	0.153706	0.0243645
GGACGTCGTAGATGTA_1	0.00401096	0.0259667	0.652794	0.00222597	0.0457169	0.257326	0.00831637	0.00364339
GGAGATGAGACATATG_1	0.00262258	0.0149381	0.0592973	0.264188	0.529004	0.0277256	0.0966965	0.00552859
GGAGATGAGTTCGGTT_1	0.0928145	0.0040159	0.00609837	0.218685	0.354504	0.0181044	0.233665	0.0721128
GGAGATGGTAAGCGGT_1	0.258883	0.583524	0.0163874	0.00667915	0.043257	0.011767	0.0407922	0.0387099
GGAGATGTCTCGGTAA_1	0.011525	0.0155713	0.0228403	0.0816316	0.651755	0.0102602	0.195158	0.0112585
GGAGCAATCACACGAT_1	0.138069	0.00468168	0.0126012	0.00274154	0.739488	0.0458007	0.0201447	0.0364724
GGAGCAATCCTTATGT_1	0.00869188	0.114976	0.167205	0.0589533	0.437647	0.067516	0.0801704	0.0648401
GGAGGATCAAGCCCAC_1	0.0155199	0.0221733	0.23563	0.120707	0.533617	0.0554358	0.0111195	0.00579643
GGAGGATTCGACGATT_1	0.00125697	0.00466747	0.00163768	0.000286631	0.00979686	0.00627501	0.955355	0.0207246
GGAGGTAGTCGACTGC_1	0.177443	0.048908	0.375487	0.012691	0.153807	0.173847	0.0397186	0.0180988
GGATCTAAGTTTGTCG_1	0.0274144	0.106906	0.34098	0.00828894	0.348547	0.139819	0.0161505	0.0118951
GGATCTACACTGGCCA_1	0.99189	0.00449653	1.77986e-05	0.000152605	7.0568e-05	7.44406e-05	0.000348107	0.00295037
GGATCTACAGCTGGTC_1	0.00964851	0.00550624	0.00455051	0.194809	0.611863	0.147892	0.0207402	0.00499101
GGATCTAGTAAGGCCA_1	0.0297654	0.822553	0.00983916	0.00447751	0.0135128	0.0338098	0.0650891	0.0209536
GGATCTAGTATTGGCT_1	0.0407711	0.756881	0.0461637	0.0144608	0.0571242	0.019039	0.0599656	0.00559456
GGATCTATCTACTATC_1	0.0841587	0.0474158	0.0542928	0.0852121	0.250048	0.156736	0.0590653	0.263071
GGATGTTAGTCGAAGC_1	0.00456318	0.0303632	0.18433	0.000933003	0.0137702	0.70095	0.0549999	0.0100904
GGATGTTCAAATAGCA_1	0.0108682	0.279231	0.234757	0.00938773	0.097954	0.276307	0.0810612	0.010434
GGATGTTCAACTGGTT_1	0.00144833	0.00400031	0.00190518	0.00375117	0.930995	0.00315401	0.0130585	0.041688
GGATGTTGTAGTCCTA_1	0.537192	0.302396	0.00552076	0.0335909	0.0126708	0.0843115	0.0076539	0.0166644
GGCAGTCCACGACGTC_1	0.0314127	0.103935	0.0292058	0.00976182	0.0710032	0.348918	0.266448	0.139315
GGCAGTCCATAGAGGC_1	0.498574	0.00648229	0.00238596	0.00582861	0.0156975	0.278008	0.0552384	0.137786
GGCAGTCTCGTGGTAT_1	0.0775274	0.814764	0.0274089	0.00381092	0.0248776	0.00692483	0.0398142	0.00487215
GGCGTCAAGTCCGCCA_1	0.884957	0.0860295	0.00566473	0.000425142	0.00244452	0.017673	0.0014158	0.00139072
GGCGTCACATTGGCAT_1	0.00281124	0.00216962	0.00329746	0.436874	0.535705	0.0067775	0.0107348	0.00163
GGCGTCAGTTGCAAGG_1	0.00331748	0.00993897	0.0190513	0.788386	0.16042	0.00457559	0.00695235	0.00735793
GGCTTGGAGTAAACTG_1	0.0375035	0.106729	0.158744	0.102762	0.462225	0.0803287	0.0475263	0.00418014
GGCTTTCAGATTACCC_1	0.00136022	0.00167147	0.0233426	0.00927031	0.223774	0.724464	0.0123454	0.00377194
GGCTTTCGTGTCCCTT_1	0.448478	0.26673	0.0696361	0.0391147	0.0753127	0.0643998	0.0291764	0.00715224
GGGAAGTGTCGTACTA_1	0.043099	0.0774421	0.039354	0.0161385	0.459617	0.0642535	0.0621214	0.237974
GGGAAGTTCAGTGTGT_1	0.00992966	0.00232764	0.00148238	0.906785	0.0567615	0.00368867	0.0106589	0.0083662
GGGACAAAGCCAAGCA_1	0.0355525	0.432557	0.109466	0.0192705	0.0602378	0.329624	0.0103034	0.00298869
GGGACAAGTACTTGTG_1	0.00310426	0.0383786	0.564018	0.00586525	0.345884	0.034892	0.00694976	0.000908339
GGGACAAGTGGGTATG_1	0.0179015	0.0117052	0.557422	0.22384	0.15839	0.0190625	0.00439395	0.00728426
GGGATCCAGAGGACTC_1	0.0106767	0.239542	0.145864	0.00922373	0.273154	0.249308	0.0639924	0.00823937
GGGATCCCACAGCCTG_1	0.0136564	0.0733393	0.333422	0.00978157	0.243343	0.266594	0.0569622	0.00290215
GGGATCCTCAGCGCAC_1	0.583868	0.0415528	0.0266575	0.0179209	0.0977773	0.153856	0.0733552	0.00501248
GGGATGACATCGCCTT_1	0.00121417	0.00660638	0.112342	0.00480854	0.728989	0.0237694	0.115553	0.00671757
GGGCCATAGTAATACG_1	0.0136223	0.0090034	0.0941079	0.00101038	0.546025	0.312841	0.0217275	0.00166272
GGGCCATCACTACCCT_1	0.0219872	0.0190106	0.124868	0.0342062	0.42587	0.329562	0.0404697	0.00402604
GGGCCATGTACTCGAT_1	0.195373	0.0180869	0.00668106	0.630705	0.114527	0.0118139	0.0178836	0.00492992
GGGCCATTCCCGTGAG_1	0.0644621	0.035138	0.064364	0.408162	0.119702	0.0743453	0.0264276	0.2074
GGGCCATTCGGAATTC_1	0.0190918	0.0187958	0.0597464	0.490567	0.230589	0.151872	0.0240384	0.00529873
GGGCTACCAATACAGA_1	0.00383697	0.0479688	0.126172	0.0135372	0.58979	0.183828	0.0328752	0.00199214
GGGCTACCAATCTAGC_1	9.898e-05	0.000243379	0.000180638	0.000272199	0.907903	0.000304631	0.0807126	0.010285
GGGCTACTCTTGGTCC_1	0.00218779	0.0359025	0.493863	0.0174511	0.334538	0.0618387	0.0472216	0.00699665
GGGCTCAGTACATACC_1	0.00171837	0.0167227	0.822947	0.00201499	0.061298	0.0809419	0.0121177	0.00223948
GGGCTCAGTATTAAGG_1	0.0152555	0.104402	0.545065	0.00267139	0.0623847	0.250036	0.0178527	0.00233237
GGGCTCATCAGTCAGT_1	0.000585268	0.000899277	0.0402725	0.00682887	0.944013	0.00325771	0.00318108	0.000962187
GGGCTCATCCAACTAG_1	0.0206946	0.0313391	0.0464639	0.0115503	0.587806	0.0694269	0.158229	0.0744908
GGGTAGAAGTTGTCAC_1	0.000486936	2.24529e-05	2.35448e-05	1.96226e-05	0.0281971	1.76059e-05	0.00100086	0.970232
GGGTAGAGTATCTCGA_1	0.313303	0.0343547	0.0840725	0.039084	0.17612	0.0271773	0.0168521	0.309036
GGGTATTAGACGGTTG_1	0.0698875	0.14133	0.0579077	0.0533219	0.345713	0.0510906	0.0973879	0.183361
GGGTATTCATATACCG_1	0.00922671	0.0444323	0.392815	0.385909	0.139441	0.020134	0.00377928	0.0042628
GGGTCACAGAGATTCA_1	0.0154362	0.00710987	0.021508	0.0307436	0.325926	0.576149	0.0194967	0.00363067
GGGTCACAGATTAGCA_1	0.05546	0.0272764	0.0305951	0.0965438	0.267168	0.10782	0.288273	0.126863
GGGTCACTCCACCTCA_1	0.0178742	0.0561765	0.0406843	0.361711	0.487146	0.026385	0.0039889	0.00603389
GGGTCTGCAAATGAAC_1	0.0269978	0.0271121	0.24304	0.106328	0.422135	0.092177	0.020844	0.0613663
GGGTCTGCAAGCTACT_1	0.00935434	0.00582388	0.00641387	0.865686	0.0412953	0.0556157	0.00867075	0.00714
GGGTCTGTCCGATAGT_1	0.0159221	0.0316548	0.0431945	0.00723194	0.468974	0.164908	0.216701	0.0514142
GGGTGAACACGAAAGC_1	0.0100617	0.0581827	0.36655	0.0194789	0.290449	0.212044	0.0402835	0.00295077
GGGTGAAGTGCGTTTA_1	0.327245	0.608975	0.00781645	0.00400017	0.0297065	0.00464318	0.00277487	0.0148392
GGGTGTCAGTCCCAAT_1	0.0952523	0.85602	0.00388924	0.00695627	0.0135556	0.00976754	0.00531821	0.00924061
GGGTGTCCAACGGCTC_1	0.0242022	0.257852	0.169239	0.136439	0.152485	0.212577	0.0383584	0.00884867
GGGTGTCTCCGTCCTA_1	0.0968206	0.101234	0.0952531	0.0777633	0.193703	0.405387	0.0217162	0.00812325
GGGTTATCAAGAGGTC_1	0.00132751	0.000292014	0.000456336	0.00128129	0.790264	0.000639144	0.0149812	0.190759
GGGTTTACAACACGTT_1	0.999436	2.9085e-05	1.30951e-07	4.07043e-05	2.39911e-06	3.99431e-07	9.98345e-06	0.000481279
GGGTTTAGTTGGCCTG_1	0.0144404	0.011511	0.0768901	0.0556205	0.631824	0.0440147	0.152782	0.0129173
GGTAACTAGCCAAGGT_1	0.0016041	0.00477585	0.0102005	0.00164784	0.849483	0.0117631	0.110499	0.0100267
GGTAACTCACAAGTTC_1	0.203295	0.727099	0.0234636	0.00235919	0.0153174	0.00923051	0.00780673	0.0114288
GGTAATCAGGCAATGC_1	0.0323982	0.0267177	0.276631	0.0920785	0.109515	0.356188	0.0592099	0.0472616
GGTAATCCACATAACC_1	0.000804222	0.00278657	0.00510904	0.00205195	0.800533	0.0145451	0.0132997	0.16087
GGTAATCCAGGGTCTC_1	0.00382177	0.0129624	0.0230786	0.00186408	0.192423	0.166784	0.592619	0.00644737
GGTAATCTCCTGGTCT_1	0.0126831	0.0175856	0.0234443	0.0376644	0.617264	0.0252938	0.110386	0.155678
GGTCACGTCCATCCGT_1	0.298269	0.463248	0.0129089	0.0262771	0.051315	0.0156871	0.0743375	0.0579566
GGTCTGGGTATGTGTC_1	0.134148	0.450813	0.0338069	0.00981401	0.3221	0.00382002	0.0218415	0.0236574
GGTGAAGAGGGTCACA_1	0.0224281	0.246126	0.0728169	0.00621685	0.0869131	0.429524	0.10065	0.035325
GGTGAAGGTCCCGTGA_1	0.00847578	0.187346	0.114973	0.00203008	0.0152625	0.654009	0.0148543	0.00304915
GGTGAAGGTTAGGCTT_1	0.0298503	0.0564906	0.0620231	0.0625249	0.64914	0.0673739	0.0690414	0.00355608
GGTGATTCACGGTAGA_1	0.00229786	0.0125757	0.0160974	0.00316919	0.168937	0.340449	0.453128	0.00334526
GGTGGCTAGAAGGATG_1	0.558707	0.428827	0.000866384	0.000739158	0.000452118	0.000116619	0.000551277	0.00974023
GGTGGCTGTGCTCTTC_1	0.0015866	0.00661427	0.0206369	0.00874625	0.768218	0.0197331	0.127727	0.0467381
GGTGGCTTCCTCAGGG_1	0.00953166	0.0312945	0.144899	0.0144013	0.549285	0.191818	0.0555302	0.0032406
GGTTCTCGTCTAGGTT_1	0.0193205	0.0426005	0.109718	0.118515	0.554713	0.134009	0.0186294	0.00249538
GGTTGTACAAACAGGC_1	0.0240099	0.0438221	0.0472185	0.0235127	0.514023	0.230931	0.102667	0.0138161
GGTTGTATCCTTCTAA_1	0.511495	0.15645	0.0258275	0.00569312	0.0295808	0.143402	0.0241393	0.103412
GTAACACAGTACCCTA_1	0.0105366	0.014009	0.210714	0.0610222	0.231608	0.396286	0.0733409	0.00248388
GTAACACGTACCTAAC_1	0.00106077	0.0242268	0.929077	0.00205386	0.0339392	0.0086034	0.000645665	0.000393293
GTAACCAAGAGTGTTA_1	0.00840493	0.0276376	0.0303665	0.129007	0.781366	0.0125747	0.00843715	0.00220628
GTAACCACATGACGAG_1	0.00314586	0.0104729	0.0312913	0.0830622	0.535062	0.0666109	0.267509	0.00284511
GTAACCAGTTCTCCTG_1	0.0258184	0.0292425	0.0582259	0.0372702	0.314814	0.0921674	0.131213	0.311249
GTAACCATCTTAGCCC_1	0.00677271	0.192498	0.413433	0.0199217	0.197547	0.105545	0.0565714	0.00771055
GTAAGTCAGCTGACTT_1	0.0452194	0.33193	0.352353	0.00924362	0.153958	0.0842021	0.0179437	0.00515003
GTAAGTCCAAATTGCC_1	0.00766011	0.0253067	0.0880025	0.0925187	0.571003	0.125716	0.0738064	0.0159862
GTAAGTCCATCCTCAC_1	0.0898069	0.224084	0.267819	0.00662301	0.361649	0.0261334	0.0167536	0.0071317
GTAAGTCGTCACTCGG_1	0.0583755	0.0113823	0.00750629	0.0218588	0.402611	0.0436426	0.451961	0.00266252
GTAAGTCGTCGGATTT_1	0.100003	0.88696	0.00253687	0.000224737	0.00109595	0.0017718	0.000946164	0.00646167
GTAATCGAGTATGATG_1	0.0158015	0.062187	0.0276036	0.0759984	0.717309	0.0309242	0.0677312	0.00244519
GTAATCGCAATCTCGA_1	0.0363336	0.079907	0.513337	0.00124033	0.0245324	0.336272	0.00497268	0.003404
GTAATCGCAGGTGACA_1	0.0315644	0.0264233	0.0421243	0.446032	0.169706	0.169067	0.072921	0.0421619
GTAATGCCAGGCATGA_1	0.0613371	0.539736	0.263596	0.00894378	0.0280725	0.0734292	0.0197157	0.00516963
GTAATGCCATCCGAGC_1	0.0817259	0.0155693	0.00926475	0.114035	0.639055	0.0260894	0.0907252	0.0235349
GTACAACGTATGCGTT_1	0.00149336	0.0105062	0.210838	0.00319876	0.0268907	0.737117	0.00959815	0.000358333
GTACAACTCGCACGAC_1	0.0530037	0.530148	0.0700536	0.0237878	0.0149114	0.276062	0.0276847	0.00434932
GTACAGTCATGACGGA_1	0.0290491	0.891606	0.0253328	0.00458219	0.0258149	0.00783584	0.00491034	0.0108692
GTAGAAAAGATAGCTA_1	0.00307953	0.000243688	0.00018519	0.00173745	0.931351	0.000270275	0.0119544	0.0511787
GTAGAAAAGCAGCCCT_1	0.000282191	0.0256088	0.880065	0.00273866	0.05018	0.0324382	0.00796618	0.000721044
GTAGAAACAATTAGGA_1	0.0538132	0.197041	0.234645	0.00289923	0.0517401	0.434719	0.0143049	0.0108378
GTAGAGGCAGAGTTCT_1	0.00765271	0.0431788	0.0380048	0.0539027	0.536153	0.0316322	0.268569	0.0209076
GTAGAGGTCAACGCTA_1	0.0149066	0.207205	0.264107	0.00591025	0.0378611	0.133241	0.0335431	0.303227
GTAGAGGTCCAGCACG_1	0.00962679	0.402979	0.447333	0.00589292	0.0139969	0.0387179	0.00850246	0.0729505
GTAGATCCAATCCAGT_1	0.0782408	0.0393377	0.712284	0.00172004	0.0995663	0.0511603	0.0121082	0.00558279
GTAGATCGTGGACTAG_1	0.00291106	0.129973	0.502641	0.0040194	0.0637097	0.27619	0.0127082	0.00784683
GTAGATCTCAGCTCTC_1	0.0099185	0.00924532	0.0269339	0.253344	0.354409	0.2115	0.103739	0.0309109
GTAGATCTCATTGCGA_1	0.0037417	0.0100035	0.00371729	0.00423297	0.0429367	0.906779	0.024186	0.00440252
GTAGGAGCAAGGATGC_1	0.418484	0.449242	0.0198247	0.0021603	0.0301138	0.011614	0.0415332	0.0270272
GTAGGTTAGAGAATCT_1	0.0472782	0.115938	0.221752	0.0071195	0.0963604	0.493311	0.0114224	0.00681818
GTAGGTTGTACCGGAA_1	0.29622	0.0285702	0.385462	0.00393747	0.0292921	0.130706	0.0844816	0.0413302
GTAGGTTGTCCATACA_1	0.0117036	0.07006	0.537358	0.00405411	0.241815	0.102039	0.0291582	0.00381224
GTAGGTTGTCCTTAAG_1	0.0155209	0.07148	0.462722	0.0100982	0.302375	0.104836	0.0138737	0.0190938
GTAGTACAGCTGTGCC_1	0.016012	0.108122	0.118533	0.087999	0.119644	0.345432	0.188858	0.0153991
GTAGTACTCCTCCACA_1	0.0317084	0.0447713	0.0303401	0.0906907	0.301651	0.151931	0.333784	0.0151241
GTATTGGAGCCTCCAG_1	0.0654025	0.922868	0.00269046	0.00115221	0.00184403	0.0034399	0.0015276	0.00107567
GTATTTCAGCCATATC_1	0.0123406	0.209364	0.155228	0.018641	0.209379	0.309337	0.0769715	0.00873881
GTATTTCTCTTTCAGT_1	0.00306302	0.00454431	0.013579	0.00106794	0.164433	0.126663	0.679975	0.00667486
GTCAAACAGCATAGGC_1	0.159006	0.0257575	0.0485396	0.207175	0.253344	0.190117	0.0124301	0.103632
GTCAAACCATGTCGTA_1	0.00731391	0.537184	0.146981	0.0169719	0.0496728	0.150296	0.0888574	0.00272336
GTCAAACGTAGCACGA_1	0.0101646	0.0290914	0.242153	0.0229114	0.173453	0.126561	0.233822	0.161844
GTCAAACTCATTATCC_1	0.00269311	0.00270995	0.053397	0.00664665	0.107825	0.690988	0.131581	0.00415955
GTCAAACTCCACGGAC_1	0.00126943	0.0561318	0.873179	0.0143918	0.00751595	0.0421531	0.00440705	0.000951414
GTCACGGAGCATTTCG_1	0.00142725	0.0741373	0.266262	0.0266161	0.441062	0.159685	0.0298697	0.000941124
GTCACGGAGGTTGAGC_1	0.0117953	0.101947	0.597373	0.055152	0.162268	0.0651055	0.00492924	0.00142897
GTCACGGCAGAATGTA_1	0.00906637	0.0867142	0.174938	0.0126597	0.294628	0.26119	0.154669	0.00613476
GTCACGGGTTCGAACT_1	0.02521	0.0421696	0.041552	0.0531357	0.39008	0.320882	0.0927666	0.0342044
GTCACGGTCCGTACGG_1	0.295359	0.375526	0.013578	0.0121517	0.043148	0.0113199	0.0851318	0.163786
GTCAGCGCACGACGCT_1	0.0170571	0.0466499	0.0300993	0.000219774	0.00537149	0.883427	0.0161748	0.00100095
GTCAGCGTCAGCGCGT_1	0.0185639	0.0489654	0.150928	0.112507	0.199502	0.434451	0.0314228	0.00366063
GTCAGCGTCGCGTCGA_1	0.0011131	0.0226169	0.199646	0.0172925	0.0909438	0.589776	0.0773755	0.00123594
GTCATCCAGTCGAGGT_1	0.481244	0.515342	0.000838738	0.000352077	0.000204414	0.00171257	0.000182435	0.000123108
GTCATCCCAAGAAATC_1	0.00698409	0.112911	0.352013	0.00521336	0.387629	0.124824	0.00911507	0.00131103
GTCATCCTCAAACCCA_1	0.00701535	0.0974524	0.0273962	0.00016425	0.00099153	0.865653	0.000815447	0.000511896
GTCATGACACGTATAC_1	0.0747631	0.0135253	0.0212778	0.102847	0.645103	0.054771	0.0654853	0.0222279
GTCATGACACTCTCGT_1	0.0689805	0.184564	0.270323	0.12255	0.184298	0.133818	0.0288862	0.00657973
GTCATTTCAAGCCATT_1	0.0354292	0.828771	0.0454896	0.0101438	0.0397061	0.01613	0.0193399	0.00499022
GTCATTTCAGCGAACA_1	0.0316669	0.838634	0.0229354	0.00301947	0.0476203	0.0388732	0.0131477	0.00410268
GTCATTTGTACAGTAA_1	0.000225445	0.0012879	0.0199757	0.000501028	0.018253	0.900416	0.0578813	0.00146002
GTCATTTGTTGTAAAG_1	0.0220021	0.486028	0.31565	0.00399326	0.0791907	0.0820489	0.00790058	0.00318616
GTCCACTAGCTATCTG_1	0.00277137	0.02575	0.32041	0.00458085	0.0464814	0.546274	0.0510496	0.00268226
GTCCACTAGTTGGACG_1	0.0816392	0.343192	0.108697	0.002082	0.0305126	0.415729	0.0147877	0.00336046
GTCCACTGTAACTTCG_1	0.00595692	0.00599778	0.0168719	0.0184836	0.0130238	0.0272413	0.0124275	0.899997
GTCCACTTCGGTGAAG_1	0.000539544	0.00457521	0.577075	0.00150202	0.0799764	0.330893	0.00435558	0.00108327
GTCCCATGTGCACATT_1	0.0128956	0.0255693	0.750203	0.0422687	0.0797221	0.0824377	0.00196841	0.00493542
GTCCCATTCATAGAGA_1	0.00653306	0.00301439	0.0357874	0.000767561	0.00755972	0.121544	0.0118644	0.812929
GTCCTCATCAGCTCTC_1	0.124403	0.230897	0.266017	0.288293	0.0267699	0.0484196	0.00575963	0.00944119
GTCGAATTCATCTGTT_1	0.0178533	0.262628	0.471081	0.0271001	0.19382	0.0184363	0.00665758	0.00242448
GTCGAATTCGGCACTG_1	0.00425531	0.0615735	0.0566999	0.0155425	0.221848	0.545347	0.0766448	0.0180887
GTCGCGAAGCCGTTAT_1	0.0104762	0.063174	0.334481	0.00327829	0.044069	0.427817	0.10086	0.0158447
GTCGCGACACTGTTCC_1	0.565059	0.282767	0.0304486	0.0088653	0.0442648	0.0246224	0.0216603	0.0223133
GTCGTAAGTTAAGCAA_1	0.00422492	0.00764208	0.0145966	0.0508642	0.85021	0.0531621	0.0168807	0.00241913
GTCGTAATCGAGTCCG_1	0.0993068	0.0813262	0.0953299	0.0358006	0.0518375	0.497586	0.112359	0.0264539
GTCGTTCCAAGAAACT_1	0.00271714	0.00170204	0.014221	0.0680803	0.900512	0.00419705	0.00521754	0.00335341
GTCGTTCGTACGGCAA_1	0.049153	0.0356952	0.164316	0.00935046	0.686461	0.0368349	0.00808954	0.0100996
GTCTACCAGGTGCTAG_1	0.0196388	0.0192521	0.0443842	0.0440897	0.121866	0.0345698	0.383591	0.332609
GTCTAGAAGGATGTTA_1	0.0252998	0.0175871	0.107371	0.0189255	0.0691356	0.640258	0.10883	0.0125932
GTCTAGACAAAGGCGT_1	0.0391315	0.0198018	0.304637	0.0123743	0.296218	0.308164	0.01817	0.00150385
GTCTAGAGTCATGACT_1	0.0124276	0.0348982	0.217063	0.03131	0.264503	0.343652	0.0571871	0.0389589
GTCTAGAGTGGAATGC_1	0.0167988	0.0687786	0.024187	0.0672439	0.692249	0.101692	0.0242737	0.00477707
GTCTAGAGTGTGGACA_1	0.913595	0.0501421	0.000918443	0.00182923	0.00156003	0.0289226	0.0024435	0.00058898
GTCTAGATCCAGCCTT_1	0.0557731	0.0511441	0.0259442	0.00488696	0.233545	0.468186	0.0822369	0.0782841
GTCTCACCATGAGATA_1	0.0135303	0.0448278	0.110686	0.139735	0.274329	0.369531	0.0396033	0.00775838
GTCTCACGTGTCCGTG_1	0.432625	0.446393	0.0278127	0.00326538	0.00928411	0.0753895	0.00333578	0.00189522
GTCTGTCCATCCGATA_1	0.0375337	0.392813	0.0671312	0.00827149	0.161197	0.0926904	0.228207	0.0121554
GTCTTTAAGCAGGTCA_1	0.547793	0.275496	0.01006	0.00212062	0.0406996	0.0207653	0.0327181	0.070347
GTCTTTAAGCGATGCA_1	0.00346569	0.000424276	0.000246166	0.00320998	0.96191	0.00113626	0.0180152	0.0115925
GTCTTTACAACTGGTT_1	0.00373877	0.0256708	0.208541	0.0108485	0.285692	0.210999	0.244906	0.0096045
GTCTTTACACAAATCC_1	0.0066745	0.447406	0.318818	0.0062694	0.100259	0.072741	0.0413062	0.0065261
GTCTTTACAGAGTTCT_1	0.303827	0.0857159	0.0310511	0.00937024	0.274526	0.0729331	0.153633	0.0689435
GTCTTTACAGGATTCT_1	0.0069113	0.0102202	0.0212239	0.0408506	0.812023	0.027985	0.0791077	0.00167795
GTCTTTAGTGGCACTC_1	0.0319383	0.127405	0.0526085	0.00550406	0.618745	0.0716744	0.085097	0.00702725
GTCTTTATCCATATGG_1	0.0376969	0.050458	0.0349615	0.00494948	0.0451308	0.0626491	0.0509786	0.713176
GTGACGCCAAGGAGTC_1	0.00375631	0.0353647	0.0173888	0.00570742	0.784456	0.0456511	0.100926	0.00674951
GTGACGCCATCTTTCA_1	0.00366686	0.0980298	0.694874	0.0109549	0.127179	0.0523294	0.0101984	0.0027674
GTGACGCCATTGACAC_1	0.0125544	0.0309369	0.0246634	0.00140553	0.0437563	0.853223	0.0315421	0.00191852
GTGACGCTCACCGCTT_1	0.0231817	0.544041	0.0298354	0.00118389	0.00581016	0.374714	0.0173743	0.00385971
GTGAGCCAGCAAATGT_1	0.00429821	0.0463869	0.166139	0.00171027	0.645772	0.0192185	0.102338	0.0141367
GTGAGCCCAACGACAG_1	0.0958429	0.886633	0.00970022	0.001917	0.00166733	0.00345671	0.000332468	0.000450374
GTGAGCCCACGCTTAA_1	0.0430677	0.246969	0.14716	0.0240545	0.171847	0.11662	0.241093	0.00918867
GTGAGCCCACGTGTGC_1	0.00551978	0.00448512	0.00653892	0.00151532	0.855206	0.0484098	0.0630467	0.0152787
GTGAGCCTCGCTGCGA_1	0.0105103	0.065633	0.0590048	0.139895	0.568254	0.0506692	0.0815191	0.0245147
GTGAGGAAGTCAGGGT_1	0.0514059	0.232971	0.616035	0.0101487	0.0332548	0.0330376	0.016924	0.00622307
GTGAGGATCCTCTCTT_1	0.0225128	0.0053069	0.0148485	0.560845	0.294162	0.0541594	0.0212929	0.0268729
GTGAGGATCGCGAAGA_1	0.00357608	0.0390845	0.656427	0.00301155	0.173287	0.0876439	0.0253579	0.0116114
GTGAGTTCAACTCCCT_1	0.00388743	0.0195489	0.541302	0.00132667	0.0699913	0.279422	0.0776838	0.00683787
GTGAGTTCACTTGAAC_1	0.00242224	0.00167013	0.0147747	0.0892148	0.762329	0.0153853	0.107254	0.00694984
GTGAGTTGTGACGCCT_1	0.00931391	0.082824	0.265669	0.00544248	0.0927876	0.419157	0.116881	0.00792421
GTGCACGAGCTACTAC_1	0.00974973	0.269507	0.189144	0.102084	0.367216	0.0426887	0.0131428	0.0064675
GTGCACGAGTCTTCCC_1	0.0334355	0.14096	0.153427	0.0116615	0.420835	0.0502228	0.180589	0.00886987
GTGCACGGTGAGTTGG_1	0.0111507	0.358915	0.430278	0.00565878	0.0438458	0.136901	0.0112125	0.00203791
GTGCACGTCGGATTAC_1	0.82056	0.172878	0.0012799	0.00116415	0.00143092	0.00164477	0.000873386	0.000169346
GTGCAGCTCACATTGG_1	0.00912558	0.223535	0.528273	0.0116883	0.150398	0.0370083	0.0164184	0.0235541
GTGCGTGAGAACTTCC_1	0.0724959	0.19295	0.0629163	0.0529411	0.246883	0.237639	0.114421	0.0197536
GTGCGTGGTAGACGTG_1	0.00419511	0.0486316	0.148861	0.00654062	0.150008	0.400437	0.20913	0.0321959
GTGCGTGTCTCCATAT_1	0.00172626	0.00800971	0.0887899	0.0135181	0.831053	0.00552018	0.0476449	0.00373741
GTGCTGGGTATCGCTA_1	0.00206554	0.0121854	0.0370331	0.101673	0.585848	0.0310328	0.221589	0.00857349
GTGCTGGGTGAATAAC_1	0.0276681	0.134133	0.103796	0.358682	0.112599	0.21897	0.0258328	0.0183183
GTGCTGGTCTACTCAT_1	0.273305	0.0198229	0.0300875	0.0182732	0.380117	0.0389454	0.188059	0.0513892
GTGGAAGAGGCCCGTT_1	0.00411094	0.007247	0.458918	0.0204508	0.374617	0.119531	0.01211	0.0030162
GTGGAAGAGTCCGTCG_1	0.00370667	0.00871515	0.0157415	0.00495949	0.00959041	0.878326	0.0314225	0.0475379
GTGGAAGCAGGCGAAT_1	0.00595762	0.00733959	0.0225447	0.067776	0.480447	0.0593619	0.323818	0.0327555
GTGGAAGCAGTGACCC_1	0.0129415	0.195782	0.171615	0.0224838	0.339652	0.182932	0.0708312	0.00376224
GTGGAGAGTAGCACGA_1	0.0069581	0.0348243	0.188701	0.0112225	0.399747	0.289409	0.0611834	0.00795426
GTGGAGATCATCTATC_1	0.0115337	0.259559	0.368533	0.15824	0.0940991	0.0944392	0.00917745	0.00441785
GTGGAGATCATGCATG_1	0.0060747	0.0219557	0.546561	0.0105305	0.23941	0.0651983	0.0762172	0.034052
GTGGCGTTCGAGGCAA_1	0.308794	0.0374873	0.114453	0.0670341	0.200002	0.223953	0.029396	0.0188806
GTGGGAACACAATGTC_1	0.00109373	0.00719502	0.215081	0.00994514	0.637518	0.0862299	0.0370092	0.00592814
GTGGGAAGTAACATCC_1	0.661647	0.336589	0.000569378	0.000387763	0.000190954	0.000351683	6.97631e-05	0.000194621
GTGGTTACATGTGGCC_1	0.103889	0.616206	0.0159184	0.00476835	0.0401277	0.101719	0.012047	0.105326
GTGGTTAGTGTGGACA_1	0.388952	0.398487	0.0200751	0.0240887	0.0180126	0.0140916	0.00795953	0.128334
GTGGTTATCCTACGAA_1	0.0314835	0.0434722	0.177378	0.00461841	0.207527	0.510283	0.0185226	0.00671426
GTGTAACTCCGGACTG_1	0.119928	0.0243555	0.0403426	0.0124427	0.59081	0.133133	0.0668253	0.0121622
GTGTCCTAGCATCAGG_1	0.00391334	0.000720016	0.00122412	0.004123	0.0630999	0.00150755	0.0239815	0.901431
GTGTCCTGTGCTCTTC_1	0.00453445	0.01352	0.535394	0.00606232	0.239699	0.185178	0.0111792	0.00443307
GTGTGATCATCGCTAA_1	0.215148	0.759911	0.00260554	0.000556795	0.00112128	0.0178343	0.00170741	0.00111625
GTGTGATGTCACATTG_1	0.0245178	0.0320848	0.122565	0.0504751	0.698265	0.0582516	0.0111451	0.00269511
GTGTTAGCAAGATCCT_1	0.101838	0.0414358	0.0247663	0.024624	0.391573	0.0180155	0.156409	0.241339
GTGTTAGTCGAGTGGA_1	0.038875	0.00412548	0.015104	0.00604793	0.810663	0.0353639	0.0880349	0.00178561
GTGTTAGTCGTAGTCA_1	0.339589	0.446737	0.0142048	0.0169397	0.0125173	0.0641499	0.0309553	0.0749077
GTGTTCCTCGTAGCCG_1	0.0220917	0.00756349	0.00723665	0.157104	0.0964444	0.0949957	0.547766	0.0667974
GTTACAGAGGTTGAGC_1	0.0232276	0.232014	0.270988	0.0216308	0.175791	0.253414	0.0192994	0.00363626
GTTACAGTCACCACAA_1	0.000419166	0.00328416	0.878134	0.000616475	0.0605801	0.0522542	0.00457433	0.000137995
GTTACGATCCGTAATG_1	0.000485032	0.000644532	0.00118192	0.00277526	0.906531	0.00197099	0.0840862	0.00232514
GTTAGACAGCAGCCCT_1	0.115243	0.279216	0.148027	0.126379	0.145423	0.0394756	0.0237788	0.122458
GTTAGACGTGATCGTT_1	0.00377101	0.0121098	0.329699	0.00277801	0.156013	0.331367	0.132802	0.0314607
GTTAGTGCAAGAGGCT_1	0.0157449	0.276819	0.192433	0.00730633	0.320374	0.0776929	0.101948	0.0076806
GTTAGTGTCTACCCAC_1	0.00842349	0.0657017	0.148128	0.00160023	0.0291402	0.741891	0.00455637	0.000559327
GTTATGGTCAAGTGGG_1	0.092062	0.0101677	0.0058057	0.00485588	0.0411939	0.129074	0.017063	0.699777
GTTATGGTCACCTACC_1	0.0518091	0.0659889	0.255937	0.00917969	0.0409314	0.567395	0.00652786	0.00223109
GTTCATTTCCTACCGT_1	0.00132795	0.00200496	0.00120875	0.774964	0.174264	0.00655669	0.0297854	0.00988845
GTTCATTTCTACTGAG_1	0.0598785	0.0264079	0.061524	0.350067	0.237232	0.248997	0.0102573	0.00563539
GTTCCGTCATGGCTAT_1	0.0461018	0.811071	0.051924	0.0348355	0.0364908	0.0150917	0.00324444	0.00124069
GTTCCGTTCGGTAGAG_1	0.0943318	0.0058154	0.00398993	0.093956	0.718446	0.00931866	0.0145487	0.0595932
GTTCGCTCAGAGTGAC_1	0.120344	0.142805	0.12606	0.0335182	0.252038	0.165359	0.094025	0.0658505
GTTGAACCACCGTGAC_1	0.0409438	0.0531156	0.296617	0.00191297	0.0712533	0.510434	0.0200285	0.00569477
GTTGAACGTCCATCTC_1	0.181364	0.720877	0.0173427	0.000933157	0.0142533	0.0231521	0.0319153	0.0101629
GTTGCTCCAAATAGCA_1	0.880834	0.0960923	0.00117497	0.00029881	0.000590717	0.0198242	0.000308743	0.000875951
GTTGTAGAGTAGCTCT_1	0.0124088	0.0682002	0.254769	0.00363954	0.546482	0.071211	0.0266822	0.0166078
GTTGTAGCACTACACA_1	0.201541	0.76742	0.0103359	0.000692207	0.00163981	0.0162323	0.000731001	0.00140779
GTTGTAGTCCTTCTAA_1	0.208825	0.464234	0.0730985	0.00376102	0.0931075	0.0452853	0.065438	0.0462502
GTTGTCCAGTCGAATA_1	0.00793338	0.00940584	0.00851767	0.432751	0.346559	0.021854	0.155189	0.0177903
GTTGTCCAGTCTAGCT_1	0.00969202	0.00209774	0.00259695	0.00105898	0.00235375	0.981658	0.000424574	0.000118035
GTTGTCCCACCGGCTA_1	0.0190127	0.271666	0.214689	0.00717931	0.0662725	0.379653	0.0377275	0.00379961
GTTGTGAAGAATTCAG_1	0.00298009	0.0128431	0.515834	0.335486	0.0925805	0.0201537	0.0166987	0.00342391
GTTGTGAAGATGACCG_1	0.503121	0.0319177	0.00355563	0.393498	0.0493654	0.00591926	0.00873434	0.00388882
GTTGTGACAATTGTGC_1	0.00282825	0.00326971	0.0890802	0.0301344	0.768428	0.0245947	0.0745391	0.00712592
GTTTACTTCTCATTTG_1	0.570116	0.202342	0.020253	0.0384048	0.114034	0.0145626	0.0120404	0.0282473
TAACACGGTGCATACT_1	0.00465069	0.0125538	0.0875478	0.0727126	0.716146	0.0309959	0.0386319	0.0367617
TAACCAGAGCCTAGGA_1	0.618134	0.259989	0.012604	0.0097384	0.0381955	0.0174494	0.0212478	0.022642
TAACCAGAGGTGAGCT_1	0.0305648	0.0146321	0.0104062	0.070886	0.0952344	0.684468	0.0872352	0.00657365
TAACGACAGTTACTCG_1	0.00499841	0.190189	0.0357937	0.0449287	0.671752	0.0172792	0.0310235	0.00403498
TAACGACTCTGACGCG_1	0.0232356	0.00983025	0.0272517	0.0343957	0.862005	0.0180939	0.0170299	0.00815738
TAACTTCCAGACAAAT_1	0.00238446	0.0176752	0.428365	0.102708	0.40206	0.0206503	0.0215351	0.00462157
TAACTTCGTAGTCTTG_1	0.0688942	0.542178	0.146388	0.086457	0.0741778	0.0653264	0.0107123	0.0058665
TAAGCACCAACATCGT_1	0.167933	0.830284	0.000504841	0.000166561	0.00042025	0.000146713	8.9196e-05	0.000455534
TAAGCACTCCTTGACC_1	0.00877242	0.375399	0.211635	0.00160987	0.0764448	0.22273	0.0972495	0.00615884
TAAGCCAGTCTAACGT_1	0.0397271	0.837102	0.045951	0.00795256	0.0155842	0.0206854	0.020192	0.0128059
TAAGCGTCATCAACCA_1	0.0016064	0.00182008	0.000798934	0.000709405	0.140618	0.000479599	0.00627982	0.847688
TAAGTCGCAGAGAATT_1	0.032417	0.0494313	0.101257	0.000974617	0.00859926	0.774922	0.0289765	0.00342268
TAAGTCGTCCACGTGG_1	0.0367476	0.0634985	0.312409	0.00217886	0.280434	0.261832	0.0364051	0.006495
TAAGTCGTCTTACTGT_1	0.00143728	0.00383099	0.047112	0.00828788	0.821869	0.047307	0.0691389	0.00101667
TAATTCCAGTCCTGTA_1	0.00173346	0.00559585	0.00651942	0.314574	0.600488	0.00328397	0.0223518	0.0454528
TAATTCCCAACCGCTG_1	0.0242045	0.0294058	0.403749	0.0102454	0.158367	0.26516	0.0266932	0.0821747
TAATTCCTCTGAATCG_1	0.00960646	0.197104	0.121085	0.00510177	0.126958	0.132968	0.343099	0.0640769
TACAACGCAATACGAA_1	0.174923	0.0219781	0.00442849	0.0241087	0.633018	0.0222191	0.103618	0.0157054
TACAACGCACCGTGCA_1	0.0465814	0.023039	0.0546145	0.467152	0.320517	0.047458	0.028126	0.0125128
TACAACGGTTGGACTT_1	0.0106152	0.0117131	0.00840698	0.217356	0.667667	0.059686	0.0173424	0.00721333
TACACCCCAGGCGAAT_1	0.025209	0.132401	0.0463016	0.00304271	0.22433	0.0285647	0.505608	0.0345423
TACATTCAGGTGGCTA_1	0.00398564	0.987778	0.00123653	0.000166025	0.00064914	0.000636925	0.000884367	0.00466294
TACCCACGTCAGCGTC_1	0.0046263	0.0701264	0.112886	0.00220072	0.691265	0.0838871	0.033903	0.00110595
TACCCACTCTGGTGCG_1	0.00852882	0.132314	0.115243	0.00798528	0.656309	0.0421751	0.0305175	0.00692735
TACCCGTCACGACGCT_1	0.0163912	0.782042	0.0524789	0.019517	0.0290146	0.00561474	0.0921738	0.00276732
TACCGAACAACCGTAT_1	0.0759212	0.0576113	0.0297703	0.210811	0.20242	0.0632358	0.215453	0.144777
TACCGAAGTCCACGCA_1	0.00874725	0.0757409	0.450531	0.00691388	0.0406425	0.07553	0.0154726	0.326422
TACCGGGCAACCACGC_1	0.056992	0.0343715	0.0648426	0.0593771	0.694886	0.0342573	0.0334508	0.0218223
TACCGGGGTCTGGTTA_1	0.00902441	0.110118	0.0715188	0.00994354	0.482803	0.184654	0.128912	0.00302646
TACCGGGTCGTTGTGA_1	0.0342804	0.101242	0.12076	0.282597	0.240469	0.114905	0.102156	0.00359021
TACCTCGAGTGCTACT_1	0.0167998	0.0110566	0.0233572	0.110317	0.641611	0.149899	0.0404872	0.00647183
TACCTCGTCGCCAGTG_1	0.0123941	0.155971	0.076622	0.110631	0.439602	0.0723221	0.0997275	0.0327311
TACCTGCAGAAACTCA_1	0.00604648	0.00636795	0.00428331	0.100134	0.289244	0.0394756	0.548561	0.00588764
TACGCTCAGGAACTCG_1	0.0156404	0.132757	0.121425	0.299952	0.408218	0.0137976	0.00582975	0.0023799
TACGCTCCAGCCGGTT_1	0.00645978	0.0650276	0.58798	0.00141794	0.109841	0.194609	0.0296109	0.00505404
TACGCTCTCATCAGTG_1	0.0308884	0.647198	0.0418544	0.0138809	0.112946	0.0810017	0.0630697	0.0091612
TACGGGCAGCGTCTCG_1	0.0621822	0.169365	0.0428509	0.104949	0.395432	0.162958	0.0572037	0.00505943
TACGGGCCACAGACGA_1	0.00378609	0.144362	0.174701	0.0324954	0.523716	0.0535758	0.0599256	0.00743836
TACGGGCCAGCAGTCC_1	0.0813645	0.52155	0.0552833	0.00312917	0.0878017	0.223033	0.0249858	0.00285254
TACGGGCCATATGCGT_1	0.183126	0.126682	0.133354	0.0462282	0.151128	0.166477	0.11435	0.0786555
TACGGGCTCGCCTTGT_1	0.203409	0.272078	0.105653	0.007321	0.0663831	0.31725	0.013451	0.0144544
TACGGTAAGAATTGCA_1	0.0438119	0.0133505	0.00990798	0.0056018	0.264553	0.561216	0.0351547	0.0664041
TACGGTACAACTACGT_1	0.0236882	0.0771577	0.0333507	0.35009	0.425664	0.0398451	0.0400626	0.0101423
TACGGTACAGTCGGTC_1	0.0443131	0.0548696	0.0124325	0.572299	0.248432	0.0155307	0.0452271	0.00689649
TACGTCCGTTATCTTC_1	0.00532534	0.0860778	0.169198	0.0429571	0.580174	0.0972271	0.0165898	0.00245118
TACTGCCCAATTTCTC_1	0.0382232	0.178563	0.114719	0.00374809	0.132855	0.376369	0.153264	0.00225951
TACTGCCGTGCATGAG_1	0.454404	0.00716013	0.00344953	0.0161834	0.223353	0.0436127	0.0727638	0.179074
TACTTACTCAGTGCGC_1	0.00252358	0.0530509	0.543457	0.00419403	0.200124	0.134569	0.0564057	0.00567566
TACTTCAAGGAAGTAG_1	0.00246572	0.0129133	0.103594	0.0618778	0.676846	0.116834	0.0241298	0.00133936
TACTTCATCTAGGCCG_1	0.0547681	0.129371	0.112273	0.111766	0.494077	0.0668571	0.0226747	0.00821253
TACTTGTTCTAGACCA_1	0.00221256	0.00424422	0.0224538	0.230372	0.669569	0.0303788	0.03897	0.00180004
TAGACCAAGGTATCTC_1	0.0337901	0.122217	0.521958	0.00261346	0.030506	0.277805	0.0063018	0.00480885
TAGACCACAAGATGTA_1	0.0588976	0.0555889	0.473845	0.00808647	0.285645	0.0483014	0.0349673	0.0346687
TAGACCAGTATAATGG_1	0.0314496	0.199382	0.0276855	0.35413	0.289248	0.0204502	0.0653369	0.0123175
TAGACCATCCTTCTAA_1	0.244333	0.640383	0.00379002	0.0025513	0.011132	0.0489456	0.0120622	0.0368027
TAGACTGAGTCACTAC_1	0.588765	0.00689698	8.08598e-05	0.00115913	0.000417963	8.2159e-05	0.00112244	0.401475
TAGACTGCAGCTGAAG_1	0.00310085	0.00102097	0.00451876	0.0275976	0.925734	0.00861115	0.0194796	0.00993701
TAGACTGTCTGTGCGG_1	0.00133918	0.0157302	0.0330232	0.00228039	0.0873288	0.850038	0.00985697	0.000403673
TAGGGTTAGCGTGTTT_1	0.00490417	0.00426166	0.0437882	0.00577267	0.928388	0.00586588	0.00538431	0.00163536
TAGGGTTCAGACATCT_1	0.0194536	0.0398012	0.128421	0.695676	0.0604298	0.0516822	0.00220694	0.00232959
TAGGGTTGTGTTGCCG_1	0.0166936	0.0301704	0.0115236	0.0134479	0.412252	0.0856149	0.410832	0.019466
TAGGGTTTCATGAGGG_1	0.0271866	0.0330677	0.0172896	0.176059	0.653777	0.0178123	0.0194745	0.0553338
TAGGTACCAGGAAGTC_1	0.0292609	0.0243461	0.0161905	0.0483716	0.626592	0.0548651	0.181244	0.0191298
TAGGTACTCGGTGAAG_1	0.0353116	0.113687	0.0723894	0.0119278	0.226173	0.38612	0.146038	0.00835277
TAGGTTGGTGCCGGTT_1	0.0852472	0.284783	0.0242968	0.00533766	0.0222238	0.568671	0.00596989	0.00347061
TAGGTTGTCCACGTAA_1	0.0363183	0.0984756	0.154715	0.00862433	0.65242	0.0191342	0.0237488	0.00656402
TAGTGCACAGACGCTC_1	0.0126356	0.0624501	0.215761	0.0496643	0.202422	0.419652	0.0349214	0.00249302
TATACCTTCCATCTAT_1	0.0287879	0.113632	0.21261	0.161309	0.223106	0.23022	0.0241058	0.00622946
TATATCCCAGATTAAG_1	0.00265132	0.0957032	0.306942	0.00157074	0.094212	0.461168	0.0336926	0.00405998
TATATCCCATAATCCG_1	0.0141693	0.596727	0.170126	0.0141748	0.18477	0.0117453	0.00578204	0.00250617
TATATCCTCCTTATCA_1	0.00884351	0.113375	0.11925	0.00595037	0.395565	0.326448	0.0289915	0.00157674
TATATCCTCTAGTACG_1	0.000783355	0.02847	0.0592393	0.00982131	0.328328	0.20592	0.364773	0.00266609
TATCAGGCAACGGTAG_1	0.0267664	0.0185605	0.158867	0.0488259	0.391828	0.324121	0.0197419	0.0112895
TATCAGGCAATAGAGT_1	0.00173503	0.0413031	0.527298	0.00486838	0.252873	0.136007	0.0341752	0.0017402
TATCAGGCAGTCAACT_1	0.0384403	0.0589844	0.0579769	0.0546016	0.430096	0.216157	0.126468	0.0172764
TATCCTAAGACTACCT_1	0.0223327	0.0626996	0.530109	0.0767048	0.237023	0.0453947	0.014868	0.0108687
TATCCTAGTGGCTAGA_1	0.269544	0.0218155	0.0119292	0.382139	0.192929	0.0157236	0.0510769	0.0548428
TATCGCCTCTATTCGT_1	0.010949	0.640244	0.1774	0.00276264	0.084795	0.0325558	0.0389928	0.0123013
TATCTGTAGCCATCCG_1	0.00048866	0.0019518	0.00407113	0.000590748	0.434571	0.0262629	0.53067	0.00139285
TATGTTCCAGGTTACT_1	0.70957	0.0862737	0.0163613	0.00219889	0.0230994	0.00797647	0.0827111	0.0718094
TATTCCACATATGAAG_1	0.00352543	0.0537746	0.628492	0.00184991	0.0809913	0.217746	0.0109824	0.00263842
TATTGCTTCTGCACCT_1	0.0131643	0.975465	0.00253866	0.00180159	0.00151023	0.00191579	0.00194918	0.00165508
TATTGGGAGTCTAACC_1	0.00440496	0.00816304	0.481876	0.0010001	0.157241	0.115433	0.22631	0.00557123
TATTGGGCAAGGGCAT_1	0.00292792	0.13894	0.333704	0.00151879	0.198866	0.270925	0.0466105	0.00650758
TATTGGGCACGAGGAT_1	0.00253137	0.0396554	0.044053	0.00420375	0.0620424	0.788483	0.0555196	0.00351113
TATTGGGGTCCACGCA_1	0.916437	0.000113473	2.05193e-06	0.00101639	6.88831e-05	0.000379114	0.000301464	0.0816817
TATTTCGAGAGGCTGT_1	0.00757829	0.02825	0.111474	0.0275193	0.243858	0.458898	0.114536	0.00788677
TATTTCGGTCGTTATG_1	0.000619614	0.00129046	0.0480589	0.00704003	0.884921	0.0073486	0.0492857	0.00143526
TATTTCGGTTGAAGTA_1	0.103538	0.853153	0.00344083	0.00180922	0.00365464	0.0100267	0.013654	0.0107236
TATTTCGTCCACTGAA_1	0.016549	0.00829299	0.013889	0.380203	0.504047	0.0319217	0.0198344	0.0252627
TATTTCGTCCCTATTA_1	0.000684341	0.0289832	0.802356	0.00500245	0.0662852	0.0436941	0.0467715	0.00622357
TCAAGACTCGATCCAA_1	0.0433122	0.0264026	0.0149197	0.0010895	0.141281	0.0887458	0.678927	0.00532246
TCAAGCATCTTTGGAG_1	0.0189054	0.0678657	0.177447	0.00956989	0.513905	0.151043	0.0495785	0.0116849
TCAAGTGTCACTTATC_1	0.49463	0.482189	0.00223705	0.00418584	0.00232414	0.00458005	0.000762788	0.00909024
TCAATTCAGATACCAA_1	0.997457	0.00220053	2.8158e-06	3.94117e-05	8.79709e-06	0.000210325	1.77357e-05	6.30407e-05
TCACAAGAGTGGCAGT_1	0.0226831	0.0793754	0.15533	0.0405333	0.43143	0.0724843	0.167197	0.0309668
TCACACCAGACCGTTT_1	0.0451449	0.923275	0.0108456	0.000659391	0.00235546	0.0125931	0.00164256	0.00348363
TCACACCAGGTCTTTG_1	0.00219905	0.00290337	0.00537157	0.860188	0.0159438	0.00188307	0.00157135	0.10994
TCACATTGTTCCTAAG_1	0.0202488	0.191354	0.628349	0.00236005	0.0489794	0.0889085	0.0143703	0.00543064
TCACGCTAGTGAGGCT_1	0.986702	0.0062756	3.39745e-05	0.000270004	5.96887e-05	4.97133e-05	0.000224164	0.00638484
TCACGCTCATATCGGT_1	0.22166	0.210036	0.0159062	0.00282488	0.0088779	0.150879	0.00954729	0.380269
TCACGGGCAACTGATC_1	0.0160309	0.129648	0.64513	0.0343893	0.0800938	0.0800963	0.0100789	0.00453253
TCACGGGCACTCCACT_1	0.0244424	0.380986	0.135304	0.00794392	0.119873	0.319877	0.00745207	0.00412135
TCACGGGCATCAACCA_1	0.0654578	0.109989	0.0735982	0.000462439	0.00627596	0.724542	0.0135533	0.00612141
TCACGGGTCTACGCAA_1	0.00510716	0.00960956	0.0865798	0.00629029	0.231088	0.643165	0.0154561	0.0027037
TCACTATAGATCGGTG_1	0.0127647	0.291312	0.471552	0.00283017	0.146974	0.0591072	0.0129456	0.00251473
TCACTCGAGTACTCGT_1	0.993623	2.3786e-05	1.28094e-05	0.000317035	9.08558e-05	3.60288e-05	5.06783e-05	0.00584569
TCACTCGGTACCCAGC_1	0.00267437	0.11067	0.565133	0.00496528	0.207141	0.0714306	0.0334096	0.00457589
TCACTCGTCCGGACTG_1	0.0062639	0.205176	0.623925	0.00510385	0.0243796	0.127727	0.00619417	0.00123062
TCAGCAAAGCATGTTC_1	0.647684	0.00242216	0.000183245	0.000287285	0.000730804	4.90335e-05	0.000597946	0.348046
TCAGCAAAGTACTCGT_1	0.0182798	0.00968275	0.0188772	0.0298151	0.470662	0.241164	0.071072	0.140447
TCAGCAAAGTGAACAT_1	0.0838873	0.55103	0.0367067	0.00555218	0.0104587	0.182534	0.0356364	0.0941946
TCAGCAACAACTGAAA_1	0.00840274	0.0415082	0.386843	0.00256122	0.0829434	0.467975	0.00828936	0.00147699
TCAGCAACATGTTTGG_1	0.00577769	0.0273386	0.182523	0.0920826	0.318822	0.307464	0.0642943	0.00169813
TCAGCCTCATTCCTAT_1	0.00875164	0.0863759	0.664376	0.00470642	0.0380052	0.173767	0.0127973	0.0112199
TCAGGGCAGGTGAGCT_1	0.0764996	0.187327	0.306138	0.0061615	0.114584	0.236318	0.06046	0.0125115
TCAGGGCTCCTCCACA_1	0.00303381	0.177914	0.42483	0.00881661	0.313159	0.0368173	0.0299356	0.00549318
TCAGGTAAGTTCATGC_1	0.769441	0.0106716	0.00132617	0.0550936	0.017371	0.102555	0.00916703	0.034375
TCAGGTAGTCATATGC_1	0.279885	0.0279477	0.0206641	0.0369364	0.355813	0.183348	0.068747	0.0266594
TCAGGTATCATCGCCT_1	0.0151147	0.0157423	0.272693	0.00132544	0.0638913	0.570626	0.0386797	0.0219274
TCAGTCCCAGAGGTAC_1	0.00913566	0.0145659	0.335633	0.186382	0.348248	0.086989	0.0151577	0.00388874
TCAGTGACACATATCG_1	0.0683015	0.852205	0.0201936	0.000949263	0.0115195	0.0366672	0.00500332	0.00516042
TCAGTGATCGTAGCTA_1	0.0242437	0.816487	0.0244403	0.0040515	0.0815903	0.0203555	0.0138815	0.0149507
TCAGTTTCAACACACT_1	0.00423043	0.0952312	0.707575	0.0056771	0.0119794	0.165226	0.0030897	0.0069914
TCAGTTTCAATAGGAT_1	0.00963782	0.0895841	0.221357	0.0222474	0.152066	0.420153	0.0785532	0.00640225
TCAGTTTCAGAAATCA_1	0.00569001	0.0192049	0.188513	0.0262929	0.517439	0.186476	0.0544374	0.0019466
TCAGTTTTCGGAGTGA_1	0.0841951	0.0898547	0.0638381	0.605918	0.0859431	0.0558757	0.0102735	0.00410189
TCATACTCAACCCGCA_1	0.0361227	0.00749815	0.0131707	0.0696483	0.547652	0.0321036	0.235619	0.058186
TCATACTGTCGCAGTC_1	0.0128959	0.141597	0.156989	0.00416573	0.261554	0.278912	0.140887	0.00299916
TCATATCTCTACCAGA_1	0.410364	0.538179	0.00581353	0.00146933	0.00291572	0.0357823	0.00327338	0.00220228
TCATCATAGTGCTACT_1	0.00352071	0.178325	0.642983	0.0311654	0.108316	0.020069	0.00662174	0.00899922
TCATCATGTACGGCAA_1	0.0024666	0.0323227	0.165136	0.00690279	0.429057	0.347176	0.0102328	0.00670646
TCATCCGGTTAGGAGC_1	0.102534	0.527705	0.0104425	0.0174237	0.189377	0.00729046	0.0942599	0.0509669
TCATGAGTCATTTGGG_1	0.0451564	0.00801251	0.0102113	0.00233415	0.843443	0.0580343	0.0153669	0.0174414
TCATGCCCACCCGTAG_1	0.0839453	0.906191	0.00497765	0.000412855	0.00149546	0.00148854	0.000829503	0.000659541
TCATGCCGTGCTAGCC_1	0.997182	0.00135276	9.19127e-06	0.000817296	0.000118169	6.29171e-05	8.58321e-05	0.000371541
TCATGCCGTTCATCTT_1	0.00376921	0.195149	0.178076	0.00759108	0.288605	0.173225	0.147613	0.00597229
TCATGGAAGATGAAGG_1	0.19561	0.165449	0.177845	0.0558693	0.113564	0.223959	0.0421527	0.0255506
TCATGGAAGTAGCATA_1	0.0426998	0.033607	0.0405813	0.0713011	0.741625	0.0275572	0.0248931	0.0177353
TCATGGATCTGTACAG_1	0.0348061	0.175166	0.0606321	0.0110288	0.067776	0.105368	0.0825102	0.462712
TCATGTTAGCACACAG_1	0.00408044	0.101977	0.0288732	0.00834127	0.784053	0.0232175	0.0476292	0.00182852
TCATGTTCACGGAAGT_1	0.0015652	0.0158951	0.424366	0.00262891	0.14844	0.379618	0.0255781	0.00190862
TCATGTTCATAAGCGG_1	0.515575	0.45418	0.00340717	0.000748009	0.00296351	0.00975888	0.0126108	0.000756576
TCATGTTTCCTGATAG_1	0.0132959	0.0328083	0.0850639	0.0168202	0.320682	0.435935	0.0878784	0.00751641
TCATTACAGCGAACTG_1	0.00306604	0.0120977	0.191077	0.0104271	0.156778	0.581871	0.0430952	0.00158749
TCATTACGTTGCAAGG_1	0.00498819	0.0123127	0.0817762	0.0637787	0.430771	0.0460961	0.35508	0.00519769
TCATTCAAGAAGGTAG_1	0.0181764	0.102273	0.0939556	0.0123517	0.691444	0.048812	0.0315438	0.00144296
TCATTCACACATGGTT_1	0.0590567	0.0111626	0.0547472	0.218981	0.147114	0.0444428	0.0408151	0.423681
TCATTCAGTCGCATCG_1	0.0106544	0.0331951	0.133317	0.00301551	0.549391	0.194202	0.0722116	0.00401318
TCATTCATCGTCTACC_1	0.00927105	0.0149971	0.070829	0.00312836	0.0438709	0.843788	0.0134114	0.000704339
TCATTGTGTGGACTGA_1	0.00200533	0.0257233	0.198447	0.00307928	0.0528506	0.638765	0.0720101	0.00712015
TCATTGTTCAGGGTAG_1	0.0331296	0.0987955	0.157462	0.0212922	0.553201	0.0564865	0.0695124	0.0101213
TCATTGTTCTCGTTTA_1	0.0496908	0.0127462	0.02364	0.0174345	0.542309	0.0331572	0.0672821	0.25374
TCATTTGCACAACCGC_1	0.0093787	0.140018	0.087721	0.00229318	0.0451062	0.706032	0.00810963	0.00134099
TCATTTGCACCTGAAT_1	0.00696385	0.00443138	0.00576532	0.00737411	0.123591	0.181214	0.508482	0.162178
TCATTTGGTGCTATTG_1	0.0067226	0.0262714	0.516174	0.0763608	0.313831	0.0513634	0.0071219	0.00215499
TCCACCACAGAGGCAT_1	0.0443514	0.824771	0.0259406	0.00996383	0.0465503	0.0138716	0.0308053	0.00374579
TCCACCAGTTCGTACA_1	0.0526953	0.932988	0.00217807	0.00299999	0.00232549	0.00195369	0.00115341	0.00370643
TCCACCATCATTACTC_1	0.0035029	0.00216049	0.00281592	0.934007	0.0386425	0.00171484	0.00130568	0.0158507
TCCACGTTCGGTTAGT_1	0.00280293	0.0161557	0.576966	0.0115342	0.300149	0.0822096	0.0093499	0.000832392
TCCAGAAAGCTTAAGA_1	0.00931879	0.104097	0.364158	0.0231418	0.338522	0.121282	0.0353283	0.00415203
TCCAGAACAGGTCAAG_1	0.00460505	0.0131433	0.0643542	0.00279295	0.538742	0.234311	0.134832	0.0072191
TCCATCGCAACGACTT_1	0.20944	0.775295	0.00335465	0.000534936	0.00229447	0.00237779	0.00204817	0.00465525
TCCATGCAGAACCCGA_1	0.0220633	0.11406	0.0527674	0.016012	0.0327531	0.734286	0.0194229	0.00863479
TCCATGCAGAATTGTG_1	0.0674615	0.096331	0.0714059	0.00179851	0.0079029	0.746483	0.00697247	0.00164499
TCCATGCGTCCTTAAG_1	0.00356879	0.0041172	0.0947312	0.00723541	0.591211	0.059433	0.195758	0.043945
TCCCACAAGAGTGGCT_1	0.00167954	0.0123497	0.850142	0.00182374	0.0448731	0.0599131	0.0169921	0.0122262
TCCCACAAGTTTCGAC_1	0.00137283	0.00636408	0.00651367	0.000586898	0.89035	0.00372329	0.0604455	0.0306437
TCCCACAGTTTGTTCT_1	0.00346614	0.0591116	0.20951	0.00364838	0.0744544	0.430295	0.213754	0.00576083
TCCCAGTCACACTTAG_1	0.0355926	0.0155909	0.127689	0.0458543	0.352536	0.171694	0.208202	0.0428415
TCCCAGTCAGCACACC_1	0.00434705	0.0172749	0.225928	0.00547089	0.435421	0.260071	0.0497475	0.00174022
TCCCAGTGTGGAGAAA_1	0.0341007	0.258418	0.0238493	0.0123621	0.258097	0.139064	0.268608	0.00550095
TCCCATGTCTAGGAAA_1	0.0107614	0.0155427	0.0683151	0.00201329	0.142402	0.483539	0.27369	0.0037373
TCCGAAACAAATGATG_1	0.0247983	0.571146	0.072238	0.00450719	0.0408523	0.203468	0.0739226	0.00906776
TCCGAAACACTGCACG_1	0.00859381	0.177327	0.105845	0.0154802	0.223989	0.183175	0.280442	0.00514764
TCCGATCGTGTAAATG_1	0.0107592	0.0145558	0.0577301	0.00830486	0.706034	0.126426	0.0657733	0.010417
TCCGATCTCGTTAGAC_1	0.0813544	0.117943	0.219834	0.0210611	0.224323	0.290415	0.0320596	0.0130101
TCCGTGTTCGGTCATA_1	0.0128748	0.301575	0.421629	0.0868324	0.0702856	0.0928207	0.0111376	0.00284458
TCCTAATTCCATTGGA_1	0.0117636	0.341778	0.116837	0.0468386	0.306857	0.0747036	0.0795083	0.0217133
TCCTCCCAGCAACAGC_1	0.0607156	0.932828	0.00127795	0.000362615	0.00104833	0.000830115	0.000868491	0.00206925
TCCTCGACATTCAGGT_1	0.00047456	0.00909602	0.0339186	0.00417889	0.90917	0.0249175	0.0161477	0.0020965
TCCTCTTCACTAAACC_1	0.0486897	0.167506	0.134916	0.0320433	0.217054	0.19397	0.0721697	0.133652
TCCTCTTGTCACCACG_1	0.174459	0.800471	0.00528442	0.000706486	0.00524856	0.0039332	0.00139704	0.00850079
TCCTTCTCACCAACAT_1	0.784625	0.0372388	0.00885955	0.0397333	0.0383409	0.0591722	0.0187379	0.0132927
TCCTTCTCACTAGTAC_1	0.0393964	0.0135934	0.0853866	0.00451747	0.0685829	0.219233	0.125057	0.444233
TCCTTTCTCCACTTTA_1	0.022333	0.629491	0.0805763	0.00684956	0.0486496	0.200324	0.00571144	0.00606547
TCGAAGTAGGACAGCT_1	0.0105379	0.0081771	0.0199286	0.220843	0.604516	0.0284748	0.0920942	0.0154285
TCGAAGTAGGGCTTCC_1	0.0196322	0.969099	0.00454072	0.000310697	0.000787534	0.00408222	0.00110054	0.000447467
TCGACCTAGACTGTTC_1	0.0185811	0.0988172	0.0187939	0.165216	0.525545	0.0651217	0.0361568	0.071768
TCGACCTTCAGGGATG_1	0.431827	0.565101	0.000402793	8.98775e-05	7.45837e-05	0.00173498	0.000229612	0.000540012
TCGACCTTCTACGCAA_1	0.0630912	0.366101	0.0383583	0.0730022	0.122596	0.275481	0.0532392	0.00813127
TCGACGGGTCCAGCAC_1	0.254889	0.432495	0.036112	0.172486	0.0593389	0.0101239	0.017341	0.0172144
TCGACGGGTTCAACGT_1	0.0048828	0.051482	0.0232635	0.00517585	0.00974059	0.879017	0.020344	0.00609427
TCGACGGTCTGTGTGA_1	0.00549251	0.0225311	0.0419636	0.119291	0.246345	0.234495	0.323593	0.00628876
TCGATTTTCTGGGCGT_1	0.492084	0.204202	0.0192704	0.02675	0.104809	0.0842167	0.0490733	0.0195945
TCGCACTAGCAGGCAT_1	0.0380434	0.426668	0.197849	0.0242359	0.0868192	0.194783	0.0262142	0.00538706
TCGCAGGCAATGTGGG_1	0.907228	0.0646217	0.000990865	0.00137812	0.0014879	0.000744263	0.00316686	0.0203826
TCGCTCAAGGGAACAA_1	0.198536	0.135433	0.137325	0.00929904	0.113217	0.0855438	0.0446069	0.276039
TCGCTCACAATCGCCG_1	0.0248301	0.0843343	0.119107	0.0539897	0.587794	0.0717746	0.0519251	0.00624481
TCGCTTGCATTGTGCA_1	0.00257628	0.027413	0.3643	0.000433507	0.294248	0.283375	0.0259742	0.00168061
TCGGATAAGTGGAAAG_1	0.00300822	0.012559	0.0279232	0.000529673	0.0031323	0.929186	0.0126059	0.011056
TCGGATAGTCTTTCAT_1	0.0101658	0.00696576	0.0696985	0.062319	0.163593	0.676106	0.00918276	0.00196947
TCGGGACAGGCCTGAA_1	0.024784	0.163671	0.702016	0.00324081	0.00867763	0.0856337	0.00787872	0.00409791
TCGGGACGTTGTTTGG_1	0.169915	0.318205	0.361556	0.00950416	0.0108561	0.0651357	0.0341353	0.0306929
TCGGGCACAGAACATA_1	0.180287	0.178686	0.178057	0.0479358	0.158504	0.206097	0.0430175	0.00741571
TCGGGCAGTACTCCGG_1	0.000201016	0.000697366	0.0185838	0.00032134	0.140754	0.0528119	0.785652	0.000978957
TCGGGTGCAATGGCCC_1	0.00907173	0.148777	0.112468	0.00171738	0.0311792	0.654733	0.0397538	0.00230082
TCGGGTGTCGACATAC_1	0.237478	0.109528	0.0315263	0.0372268	0.431937	0.0325608	0.0372863	0.0824569
TCGGTCTCACGTCGTG_1	0.00132745	0.0446187	0.0233545	0.00399412	0.642308	0.0213311	0.25605	0.00701648
TCGGTCTTCATCCTGC_1	0.0145201	0.142475	0.372536	0.0144749	0.013384	0.414716	0.0248662	0.00302741
TCGTAGAAGCCTCTCT_1	0.0939877	0.0355088	0.0890912	0.0306324	0.174138	0.107951	0.0975396	0.371151
TCGTAGACATGGATCT_1	0.599537	0.330785	0.0094809	0.00255388	0.00754975	0.0310395	0.0105382	0.00851592
TCGTCCAGTATCTTCT_1	0.0347638	0.360626	0.179694	0.0331656	0.267449	0.0404365	0.0753625	0.00850286
TCGTCCAGTCTACTGA_1	0.00823179	0.0995277	0.395425	0.0146818	0.269554	0.127145	0.0800323	0.00540163
TCGTCCAGTGTGGACA_1	0.631104	0.302337	0.0270858	0.000818347	0.00236619	0.0291007	0.00464025	0.00254739
TCGTCCAGTTTAAGGA_1	0.00649436	0.00631292	0.00501813	0.289752	0.672386	0.00475463	0.0124543	0.00282808
TCGTGCTAGCGTTAGG_1	0.132681	0.0280767	0.0112837	0.0137541	0.537003	0.0416618	0.21544	0.0200991
TCGTGCTCACTGAATC_1	0.014894	0.0207352	0.542149	0.00694757	0.23739	0.168633	0.00697698	0.00227433
TCGTGCTTCACCTACC_1	0.0261622	0.0165679	0.00324195	0.00224072	0.0115701	0.0140558	0.0147265	0.911435
TCGTGGGCAATCAGCT_1	0.000334876	0.00549582	0.117504	0.000106175	0.0626046	0.798763	0.0143935	0.000797947
TCGTGGGGTCCTGTTC_1	0.00290322	0.00246883	0.00746436	0.000245414	0.00100999	0.874209	0.0042824	0.107417
TCGTGGGTCATGAGGG_1	0.0887043	0.264793	0.27735	0.00553096	0.181588	0.0852268	0.086532	0.0102746
TCTAACTAGATGACCG_1	0.000526339	8.78433e-06	3.56524e-05	2.94808e-05	0.000298677	5.83871e-05	0.984631	0.0144113
TCTAACTTCCACAGCG_1	0.261756	0.708402	0.00258162	0.000561478	0.00436765	0.0128172	0.00620167	0.00331231
TCTACATAGTAACAGT_1	0.00280147	0.014294	0.236126	0.00114512	0.228138	0.0592418	0.447975	0.0102786
TCTACATAGTGGATTA_1	0.169725	0.694984	0.01877	0.00367519	0.0131599	0.0827331	0.0132336	0.00371943
TCTACCGAGCAATTAG_1	0.914327	0.0209794	0.00325693	0.00141817	0.00231215	0.0400208	0.00278323	0.0149026
TCTACCGCATAATGAG_1	0.00159007	0.00214639	0.00243615	0.00206224	0.93121	0.0442968	0.0124058	0.00385292
TCTACCGTCTTTCCAA_1	0.00528285	0.270375	0.18589	0.00221563	0.0293035	0.470957	0.0336028	0.00237385
TCTATACGTAATGATG_1	0.043509	0.296366	0.0329673	0.155789	0.182287	0.0916771	0.157125	0.0402804
TCTATCAAGCTGCGAA_1	0.392338	0.00427017	0.00327017	0.00153641	0.000920717	0.566357	0.0037092	0.0275988
TCTATCAGTGTTTCTT_1	0.0034817	0.0686198	0.0404038	0.0212702	0.485253	0.283314	0.0937376	0.0039206
TCTCACGAGGGAGTGG_1	0.511413	0.440836	0.00529882	0.015904	0.0161506	0.00301983	0.00630738	0.00107027
TCTCACGAGTGGAATT_1	0.00590268	0.0728853	0.142345	0.0582551	0.373141	0.328922	0.0161466	0.00240174
TCTCACGCACATGACT_1	0.012035	0.981379	0.00271819	0.000165033	0.000749634	0.00152442	0.000989204	0.000439896
TCTCACGGTGGTTCTA_1	0.00500111	0.00670146	0.0102683	0.0509413	0.773532	0.0377745	0.0858212	0.0299601
TCTCACGTCCGATTAG_1	0.00194233	7.72954e-06	3.52945e-06	0.000455877	0.00012285	1.618e-05	0.000194378	0.997257
TCTCAGCCAACGCCCA_1	0.0850336	0.0273215	0.12715	0.00831671	0.418547	0.220556	0.0972255	0.0158497
TCTCAGCGTCAAACGG_1	0.00794139	0.0771867	0.0860703	0.0764974	0.493648	0.0512858	0.161903	0.0454679
TCTCAGCTCAGACCGC_1	0.00129443	0.0409931	0.329919	0.000602779	0.0324335	0.503614	0.0839596	0.0071838
TCTCAGCTCTCATGCC_1	0.00252774	0.00738253	0.00439304	0.0216379	0.412104	0.073835	0.475367	0.00275252
TCTCCGACATCAGTGT_1	0.00524044	0.00856547	0.0255612	0.0156167	0.318178	0.160264	0.416277	0.0502976
TCTCCGATCCCACAGG_1	0.372209	0.0159595	0.00840869	0.110055	0.116595	0.206288	0.140296	0.0301893
TCTCTGGAGCACTAAA_1	0.053902	0.281548	0.174721	0.0166565	0.287391	0.122832	0.0448571	0.0180919
TCTCTGGCACCCTATC_1	0.0134512	0.0423383	0.102813	0.0156065	0.3731	0.0641291	0.0567349	0.331827
TCTCTGGGTCGCCACA_1	0.00348862	0.0160388	0.72039	0.00172214	0.0751842	0.157486	0.0165088	0.00918185
TCTCTGGTCGAACGGA_1	0.00960688	0.000736644	0.000446909	0.000157163	0.000909452	0.000139064	0.000442862	0.987561
TCTGCCACAATTGCAC_1	0.12715	0.120355	0.300496	0.0627113	0.3079	0.0526044	0.0181139	0.0106701
TCTGCCACAGACGATG_1	0.00944931	0.016354	0.298473	0.0458518	0.208374	0.172129	0.21707	0.0322995
TCTGCCACATAACAGA_1	0.0204187	0.462625	0.134888	0.0294355	0.0745392	0.119461	0.109007	0.0496262
TCTGCCAGTGACAACG_1	0.0053998	0.0142609	0.0207092	0.410056	0.501356	0.0161233	0.0274552	0.00463939
TCTGGCTCACGCACCA_1	0.00188746	0.0833256	0.017667	0.00142333	0.0401581	0.216454	0.634454	0.00463033
TCTGGCTGTGAGATTA_1	0.00556282	0.0204066	0.0161781	0.0226205	0.0683918	0.098715	0.73559	0.0325351
TCTGGCTTCCCATACC_1	0.194627	0.483018	0.0136211	0.0116583	0.036777	0.145706	0.0438245	0.0707684
TCTTAGTAGGTATTGA_1	0.0145256	0.106901	0.0563197	0.0016306	0.0935673	0.677597	0.0416244	0.00783507
TCTTAGTCACCCTGTT_1	0.00320299	0.000555573	0.000544402	0.00334892	0.820541	0.000862109	0.103023	0.0679227
TCTTAGTGTGAGATTA_1	0.0999549	0.0226213	0.00909517	0.0856799	0.384565	0.0563546	0.232817	0.108912
TCTTAGTGTGATACCT_1	0.0479468	0.123399	0.0786536	0.065001	0.314981	0.111319	0.245171	0.0135279
TCTTCCTGTTAGGCCC_1	0.0273394	0.040061	0.0207549	0.042524	0.283337	0.0701222	0.499112	0.0167495
TCTTCCTTCCCTTGTG_1	0.00311123	0.00334968	0.0273907	0.0036344	0.665186	0.215675	0.0633537	0.0182991
TCTTCCTTCGAGTGGA_1	0.00348411	0.0323785	0.0504224	0.00205291	0.191646	0.420245	0.296928	0.00284339
TCTTGCGCAATCGCCG_1	0.00829094	0.0091598	0.0427096	0.00326001	0.235458	0.592439	0.107356	0.0013265
TCTTGCGCATGCGGTC_1	0.00176469	0.0116288	0.764067	0.0107473	0.100073	0.105449	0.00483489	0.00143522
TCTTGCGGTTAGAAGT_1	0.0064659	0.212622	0.352155	0.00279434	0.10835	0.256619	0.0575535	0.00344019
TCTTGCGTCATATGGC_1	0.00978611	0.0497031	0.0457751	0.704174	0.177466	0.00853637	0.00313191	0.00142757
TCTTGCGTCCGTGCGA_1	0.0420474	0.0583933	0.0162878	0.143445	0.252841	0.0516683	0.4018	0.033517
TCTTTGACAAAGTATG_1	0.0339163	0.296725	0.128975	0.00568097	0.0784099	0.365331	0.0881859	0.00277595
TCTTTGAGTCACCACG_1	0.00492082	0.0345601	0.0275216	0.000637995	0.00206458	0.926433	0.00345377	0.000408328
TCTTTGATCTAAGCGT_1	0.00102931	0.00433898	0.0205053	0.00586847	0.893873	0.0112859	0.0539342	0.00916494
TGAATCGAGTTCGCAT_1	0.00512407	0.022723	0.0115981	0.00277733	0.0964152	0.0676303	0.789145	0.00458669
TGAATGCAGAGTCGAC_1	0.00123275	0.0107767	0.648941	0.00908096	0.130658	0.187443	0.0108783	0.000989529
TGAATGCAGGTTGACG_1	0.185297	0.0429564	0.0236578	0.240044	0.156337	0.283547	0.0529817	0.0151789
TGACAGTAGACCCTTA_1	0.00576922	0.0137325	0.11583	0.0124223	0.460304	0.372756	0.0162798	0.00290678
TGACAGTCAGGAATCG_1	0.0199505	0.0175343	0.0121776	0.0211191	0.353823	0.0169603	0.0845458	0.473889
TGACAGTCAGGCGTTC_1	0.0963012	0.821544	0.0125767	0.00240805	0.0223475	0.0347849	0.00619569	0.00384176
TGACAGTGTGGTCTTA_1	0.0115951	0.314374	0.389578	0.00590566	0.131825	0.132854	0.00842889	0.00543829
TGACCCTCAAGTTGGG_1	0.930987	0.00265148	0.000809594	0.0257526	0.00383075	0.000932838	0.00200274	0.0330325
TGACCCTCACTGGATT_1	0.0237102	0.154483	0.0204656	0.00966886	0.0562984	0.6902	0.0402274	0.00494655
TGACCCTTCTCTGACC_1	0.00560786	0.00264427	0.00171343	0.971964	0.0147113	0.00251085	0.000581971	0.000266591
TGACGCGAGGGTGAGG_1	0.132885	0.069009	0.128294	0.0521324	0.170106	0.418664	0.023242	0.00566829
TGACGCGCAGTATTCG_1	0.0392787	0.0232886	0.00946791	0.107092	0.456715	0.270549	0.0742259	0.0193826
TGACGCGTCATGAGTC_1	0.254351	0.408788	0.0391174	0.00696584	0.0443104	0.0912215	0.0211914	0.134055
TGACGCGTCTTGATTC_1	0.0415593	0.0443343	0.602125	0.0128425	0.243369	0.0485397	0.00632658	0.000903291
TGACTCCGTTATGGTC_1	0.0107982	0.0512272	0.205425	0.0017677	0.0654726	0.567095	0.0725509	0.0256628
TGACTCCTCACACCCT_1	0.00406386	0.00476151	0.0120972	0.0128955	0.866554	0.0557043	0.0324548	0.0114688
TGAGACTCACATGGTT_1	0.115057	0.0528182	0.0766505	0.0819247	0.409821	0.157858	0.0954358	0.0104348
TGAGCATAGGTGAGAA_1	0.0136732	0.194996	0.16228	0.0523134	0.159045	0.388084	0.0259515	0.00365677
TGAGCGCAGTGAACAT_1	0.0526458	0.276959	0.133413	0.132869	0.0698928	0.2237	0.0143882	0.096133
TGAGGAGAGATGTTGA_1	0.84731	0.00697583	0.00393983	0.0278342	0.0178952	0.0835704	0.00855125	0.00392367
TGAGGGACAATGTCTG_1	0.00621994	0.211189	0.0747064	0.00960764	0.391116	0.187261	0.115079	0.00482181
TGAGGGATCCTAAACG_1	0.0369296	0.302406	0.0956948	0.0109381	0.238881	0.158188	0.145771	0.0111913
TGAGGGATCGAACCAT_1	0.0110693	0.140059	0.121589	0.0173136	0.0941615	0.549345	0.0618528	0.0046092
TGAGGTTCACCATAAC_1	0.000801256	0.00171212	0.0290054	0.00116345	0.318822	0.57517	0.0649843	0.00834112
TGAGTCAAGTTGGACG_1	0.0308897	0.0284557	0.0565988	0.232485	0.202255	0.312736	0.0127513	0.123829
TGAGTCAGTGGATGAC_1	0.0343843	0.028618	0.0211997	0.0554349	0.810941	0.00886745	0.0180338	0.0225209
TGAGTCATCGTAGGGA_1	0.00465041	0.0154299	0.0135907	0.000543022	0.0917085	0.452394	0.417144	0.00453982
TGAGTCATCGTTGTTT_1	0.0193401	0.0100589	0.0121027	0.214595	0.671849	0.00995413	0.0379451	0.024155
TGAGTCATCTCAGGCG_1	0.105388	0.119321	0.105359	0.00530053	0.0372224	0.573131	0.0405744	0.0137044
TGATCAGCAACGCCCA_1	0.00145533	0.00306396	0.375255	0.00902209	0.33255	0.256446	0.0204179	0.00178978
TGATCAGTCCAACTGA_1	0.0786203	0.0412613	0.0315638	0.0455658	0.0428948	0.0182071	0.148697	0.593189
TGATCAGTCCTCTAAT_1	0.00504629	0.177149	0.362163	0.0169869	0.121903	0.232508	0.0752697	0.00897394
TGATCAGTCGTACCTC_1	0.00445604	0.00557832	0.0295835	0.00868578	0.864117	0.0157035	0.0245979	0.047278
TGATCAGTCTCCCATG_1	0.0525538	0.0193821	0.156941	0.00808724	0.121779	0.570782	0.0527531	0.0177214
TGATCTTAGCGACAGT_1	0.00775382	0.523294	0.235657	0.0128234	0.170212	0.0308783	0.012757	0.00662469
TGATCTTGTCCAGCGT_1	0.0189286	0.0179488	0.0334611	0.00171533	0.0205858	0.902249	0.00318507	0.00192662
TGATCTTTCCACTTCG_1	0.0383808	0.0108425	0.00300887	0.0848603	0.799234	0.00442137	0.0179733	0.0412786
TGATGCAAGCATCTTG_1	0.000966848	0.00149315	0.00192805	0.00966807	0.310501	0.0237291	0.648903	0.00281058
TGATGCAAGCTGGCCT_1	0.0421044	0.737297	0.0282638	0.0101459	0.0336095	0.0378763	0.018226	0.0924766
TGATGGTCAACCACGC_1	0.145453	0.0933628	0.0262527	0.0521957	0.11615	0.330703	0.219951	0.0159321
TGATGGTGTAGATGTA_1	0.00744047	0.357483	0.312871	0.0136579	0.0402297	0.208887	0.0492446	0.010186
TGATGGTTCTTCCCGA_1	0.00125881	0.0486897	0.779248	0.00559994	0.104562	0.053309	0.00458752	0.0027457
TGATTCTCAACACAAA_1	0.0148161	0.0655664	0.0265376	0.000979115	0.0456889	0.707922	0.12525	0.01324
TGATTCTGTAACCCTA_1	0.13654	0.23207	0.00817807	0.00264889	0.0308425	0.499559	0.081333	0.00882868
TGATTCTGTAGGAAAG_1	0.0556065	0.00698109	0.00686504	0.0050518	0.0602322	0.807784	0.0165974	0.0408818
TGATTCTGTCTCAAGT_1	0.00241478	0.00662896	0.860231	0.00494846	0.109743	0.0105262	0.00353648	0.00197055
TGATTCTGTTGGGCCT_1	0.0245947	0.00712124	0.0104639	0.0122749	0.196235	0.184563	0.532596	0.0321524
TGATTTCCACGAGGTA_1	0.0492309	0.0354339	0.00672568	0.0633222	0.745412	0.0361764	0.0586112	0.00508807
TGATTTCGTCGTTCAA_1	0.0249921	0.803786	0.0553903	0.00315299	0.0527016	0.0283836	0.0201828	0.0114101
TGATTTCTCGACACTA_1	0.0134746	0.037648	0.0696305	0.00157188	0.0355116	0.828605	0.0108211	0.00273684
TGCACGGAGAGCAGAA_1	0.0325175	0.0827674	0.0904106	0.00103269	0.0444088	0.719753	0.0239483	0.00516171
TGCAGATCACCTCAGG_1	0.0313495	0.0224261	0.0923103	0.00874207	0.111773	0.0829239	0.0899399	0.560536
TGCAGATTCTCTGGTC_1	0.0163854	0.00387426	0.0032058	0.00223038	0.0530993	0.00422986	0.021682	0.895293
TGCAGGCAGAGGCCAT_1	0.0198616	0.00504632	0.030251	0.0805353	0.788551	0.0565355	0.0140183	0.00520107
TGCAGTAGTTTGCCGG_1	0.00441841	0.0197765	0.651023	0.00276535	0.0915246	0.186951	0.0361005	0.00744034
TGCATCCTCAGACCTA_1	0.229733	0.0628058	0.107785	0.136166	0.199088	0.16213	0.078359	0.0239324
TGCATCCTCGCCTTTG_1	0.00114284	0.975185	0.0035535	0.00553611	0.00194156	0.00667583	0.00512218	0.000843014
TGCATGACAGAGGTAC_1	0.712309	0.137563	0.0065774	0.00118382	0.00589871	0.116426	0.0136707	0.00637133
TGCCGAGAGCCACTCG_1	0.0140999	0.956336	0.000869159	0.00139861	0.00440107	0.00155237	0.0167859	0.00455656
TGCCGAGTCTTTGATC_1	0.0144028	0.115085	0.0300623	0.0113334	0.0657454	0.0738072	0.55207	0.137495
TGCGACGGTTCGAACT_1	0.898794	0.0419283	0.00164568	0.00152767	0.00494727	0.00942866	0.01033	0.0313984
TGCGATAGTCAAGTTC_1	0.255463	0.153715	0.0233531	0.0621889	0.167605	0.0692011	0.23776	0.0307146
TGCGATAGTCGATGCC_1	0.0243562	0.0909311	0.00763697	0.00295029	0.350526	0.00842919	0.487188	0.0279817
TGCGATAGTTTACGTG_1	0.0295902	0.00105336	0.00148783	0.004221	0.0732075	0.172563	0.0287519	0.689126
TGCGGCACACTCATAG_1	0.00711882	0.0588026	0.578448	0.0289963	0.247509	0.069422	0.00807864	0.00162443
TGCGGGTAGAGCAGTC_1	0.00763263	0.109715	0.319566	0.0701822	0.117239	0.283218	0.0520652	0.0403817
TGCGGGTAGGGTGAAA_1	0.982131	0.0148478	3.8533e-05	0.000173964	4.20166e-05	0.000403353	0.000898954	0.00146433
TGCGGGTGTCGCTTGG_1	0.00387558	0.0164922	0.287206	0.0309361	0.0331412	0.614256	0.00983841	0.00425471
TGCGGGTGTTTCGACA_1	0.00519741	0.04098	0.52031	0.0057049	0.149711	0.243925	0.0321786	0.00199314
TGCTCCAAGAGGGTGG_1	0.0289057	0.0711735	0.181282	0.00398916	0.128191	0.519213	0.056128	0.0111177
TGCTCCACAAGCGCTC_1	0.114885	0.0825122	0.0216502	0.0101371	0.241293	0.0632902	0.22101	0.245222
TGCTCCACACTTGTCC_1	0.00602958	0.0292142	0.493579	0.0161334	0.217067	0.218362	0.0165245	0.0030902
TGCTCCATCCCACAGG_1	0.378103	0.0144959	0.00329205	0.0144802	0.444425	0.00329688	0.0636502	0.0782564
TGCTCCATCGATTGAC_1	0.0512286	0.459266	0.437187	0.00329586	0.00868733	0.0211659	0.00542664	0.0137428
TGCTCGTAGTTTGAGA_1	0.0142511	0.142149	0.225734	0.0015195	0.0230126	0.559895	0.0281818	0.00525686
TGCTGAACATACGCAT_1	0.0384589	0.0894174	0.0350435	0.504919	0.225319	0.0580372	0.0373013	0.011504
TGCTGAAGTTATGGTC_1	0.00329051	0.314805	0.263884	0.00224043	0.0522489	0.337484	0.0215765	0.00447132
TGCTTCGAGATGCTTC_1	0.00621379	0.0313328	0.0203523	0.0185337	0.0257623	0.487177	0.340687	0.0699406
TGCTTCGCAAAGACTA_1	0.0092523	0.0215184	0.135327	0.0810182	0.691107	0.049714	0.00867605	0.00338731
TGCTTCGCACCGGAAA_1	0.0724712	0.142	0.0437493	0.00218117	0.0656283	0.594059	0.0753258	0.00458555
TGCTTGCGTATAGGGC_1	0.737853	0.130601	0.0123074	0.00278429	0.011346	0.0860089	0.0167065	0.00239221
TGCTTGCTCCAAAGGG_1	0.00603261	0.129287	0.0684089	0.0062913	0.165627	0.580337	0.0407484	0.00326813
TGCTTGCTCTTCCGTG_1	0.0134765	0.188084	0.066507	0.181152	0.11128	0.252827	0.0933929	0.0932799
TGGAACTAGAGAGGGC_1	0.000821668	0.00667921	0.0498394	0.0616382	0.682329	0.16946	0.0287893	0.000443035
TGGAACTAGGAGTCTG_1	0.00514596	0.0145486	0.204391	0.009945	0.694684	0.0359547	0.0324188	0.00291251
TGGAGAGAGCATCAAA_1	0.0685642	0.0499129	0.0267139	0.340465	0.332298	0.0363177	0.0326557	0.113073
TGGATCAAGCTCGTGC_1	0.0434311	0.420412	0.275868	0.0111694	0.0269497	0.114325	0.0709565	0.0368872
TGGATCACAACAGCTT_1	0.0668799	0.259858	0.190795	0.0167876	0.138641	0.267057	0.0514906	0.00848966
TGGATCAGTACTTCCC_1	0.0763298	0.0129287	0.124601	0.018132	0.149131	0.0863397	0.267362	0.265176
TGGATCATCTACGCGG_1	0.864059	0.103257	0.00299443	0.00060647	0.00636177	0.00211242	0.00174087	0.0188685
TGGATGTTCAAATAGG_1	0.386351	0.174461	0.0144512	0.00425215	0.0150082	0.381626	0.0185251	0.00532479
TGGATGTTCTTCTCAA_1	0.0139884	0.00821005	0.957876	0.000694796	0.00181966	0.0115804	0.00182813	0.00400201
TGGCGTGAGAACCCGA_1	0.00669485	0.168304	0.215134	0.0234138	0.524532	0.0429265	0.0166206	0.00237377
TGGCGTGAGGGAGTGG_1	0.0266773	0.553878	0.382991	0.0022096	0.0153385	0.011871	0.00185763	0.00517662
TGGCGTGTCCCACAGG_1	0.0124314	0.0506643	0.119204	0.00446039	0.401568	0.0573843	0.318257	0.0360308
TGGGAAGGTCAGTTTG_1	0.639842	0.321816	0.00354119	0.000334247	0.00228389	0.0243926	0.0053781	0.00241159
TGGGAAGTCTCCTGAC_1	0.0530508	0.0159121	0.00742644	0.604833	0.165615	0.0434492	0.0486055	0.0611088
TGGGAAGTCTTCACGC_1	0.0290421	0.0451765	0.00787177	0.194527	0.54218	0.0505912	0.121291	0.00932014
TGGGAGAAGACCAAGC_1	0.00147987	0.0098784	0.239207	0.00457878	0.213897	0.515143	0.0153792	0.000436705
TGGGAGAAGGACGCTA_1	0.164423	0.68406	0.078567	0.00359026	0.0216436	0.0334716	0.0115227	0.00272142
TGGGAGAAGGCGTCCT_1	0.0943334	0.0294526	0.142566	0.00395093	0.403946	0.242512	0.0781393	0.00509995
TGGGATTAGAATCGAT_1	0.00556171	0.0440199	0.0113724	0.0972388	0.724304	0.0208505	0.0888586	0.00779428
TGGGATTAGGGTACGT_1	0.0676033	0.00617312	0.00799349	0.00609102	0.0214822	0.112156	0.0599084	0.718593
TGGGATTTCCGATAGT_1	0.0350441	0.946747	0.00132672	0.0068881	0.00245118	0.00106254	0.00206426	0.00441578
TGGGCGTAGACGCCCT_1	0.0630307	0.139483	0.257504	0.00121263	0.0364031	0.463842	0.0312273	0.00729722
TGGGCGTAGGAATTAC_1	0.291757	0.0230305	0.0519777	0.0528907	0.250934	0.190701	0.119	0.0197098
TGGGCGTCAGGACGAT_1	0.00665617	0.0178819	0.0447169	0.0137962	0.296616	0.190568	0.348673	0.0810912
TGGGCGTGTCGTCGGT_1	0.799907	0.0134376	0.0100257	0.0107968	0.0286494	0.130566	0.00577546	0.000842149
TGGGCGTTCAAATGAG_1	0.012475	0.283587	0.214337	0.0378089	0.19194	0.139677	0.114395	0.00578055
TGGGCGTTCCCATAGA_1	0.00164138	0.0228032	0.105858	0.00942897	0.804299	0.0231329	0.0320872	0.000749183
TGGGCGTTCTCGTCAC_1	0.0844869	0.183408	0.333804	0.00496126	0.0973747	0.120711	0.0786175	0.0966359
TGGGCTGAGAGTCTTC_1	0.0231873	0.264694	0.0443762	0.00857131	0.0983002	0.447927	0.106694	0.00625058
TGGGCTGAGATGGGCT_1	0.0785993	0.650769	0.0819574	0.0215191	0.124323	0.0175863	0.0182249	0.00702105
TGGGCTGAGGGCAAGG_1	0.00633573	0.036102	0.318512	0.018751	0.125601	0.402627	0.0868372	0.00523378
TGGGCTGTCTCGGGAC_1	0.00222924	0.0604119	0.87889	0.000361919	0.0314707	0.025399	0.00061064	0.000626275
TGGGTTACAAATAGCA_1	0.934052	0.00382878	0.000907368	0.0244178	0.0126383	0.000727741	0.00196787	0.0214605
TGGGTTAGTCATCACA_1	0.377129	0.58916	0.00230474	0.00710581	0.00668287	0.00377577	0.00772801	0.00611416
TGGTACAAGTTGCCCG_1	0.00183339	0.00372186	0.0196054	0.0232506	0.873194	0.0173404	0.0582975	0.00275682
TGGTACACAATGAAAC_1	0.0122126	0.048463	0.320939	0.00194977	0.123101	0.477316	0.0139879	0.00203079
TGGTACAGTGTGTTTG_1	0.0423797	0.329917	0.317658	0.0113487	0.196806	0.0323068	0.0508772	0.0187064
TGGTAGTAGCTGACTT_1	0.0102185	0.027813	0.0198643	0.00205243	0.048493	0.102851	0.724668	0.0640394
TGGTGATAGGATTTAG_1	0.00366623	0.00503502	0.0203005	0.413894	0.405172	0.0139972	0.068294	0.0696412
TGGTGATGTACCGCGT_1	0.326065	0.338677	0.109395	0.0320855	0.0532302	0.113616	0.018951	0.00798028
TGGTTAGCAACCGTAT_1	0.0743732	0.693799	0.0283389	0.00711669	0.0184218	0.017195	0.0124866	0.148269
TGGTTAGCAATCCTTT_1	0.00474418	0.038359	0.598235	0.00244548	0.208724	0.100336	0.045739	0.00141822
TGTAACGTCTCTATGT_1	0.0147722	0.00221851	0.00354757	0.00139648	0.513303	0.144155	0.304863	0.0157444
TGTAAGCCACCTGATA_1	0.0290939	0.0203519	0.00826832	0.442243	0.44676	0.0189303	0.0299807	0.00437139
TGTACAGCAAGAGCTG_1	0.00138836	0.107675	0.785696	0.00267338	0.0253918	0.0653196	0.0109993	0.00085679
TGTACAGTCCCGAGTG_1	0.0216303	0.20524	0.100638	0.15654	0.296195	0.0735103	0.101657	0.0445887
TGTCAGAAGCTGGTGA_1	0.0477469	0.0168414	0.0867663	0.140877	0.375986	0.249621	0.062397	0.0197645
TGTCAGAAGCTTCTAG_1	0.00203331	0.0145137	0.029755	0.0231652	0.787896	0.0394864	0.10094	0.00221005
TGTCAGACAACGACAG_1	0.0186054	0.00241803	0.00237109	0.00117977	0.958117	0.004333	0.00453295	0.0084432
TGTCCACAGTAGGGTC_1	0.0164639	0.624821	0.130484	0.0203735	0.117488	0.0721788	0.0137824	0.00440769
TGTCCCACAAGACAAT_1	0.000808542	0.00147965	0.00699284	0.615098	0.308708	0.0173664	0.0474548	0.00209205
TGTCCCAGTGTGAGCA_1	0.00483047	0.0476873	0.366871	0.0321376	0.166315	0.266354	0.112345	0.00345918
TGTCCTGGTAGCTCGC_1	0.034522	0.0383088	0.175028	0.00924311	0.535519	0.162885	0.0404926	0.00400153
TGTCCTGTCTCGGGAC_1	0.00315739	0.00798603	0.120129	0.00484967	0.629917	0.198297	0.0349042	0.000759797
TGTGAGTAGTCGAAAT_1	0.00340028	0.00331158	0.0258409	0.00311327	0.00477112	0.003912	0.00198031	0.953671
TGTGAGTGTACCTAGT_1	0.00645589	0.0977856	0.0501133	0.0998852	0.237455	0.422467	0.0834498	0.00238847
TGTGAGTGTAGGAGGG_1	0.0154447	0.171631	0.0918631	0.0211964	0.187468	0.0481544	0.418017	0.0462249
TGTGAGTGTGGAGGTT_1	0.0239996	0.553191	0.0499006	0.00458236	0.171366	0.112171	0.0551989	0.0295909
TGTGATGAGACATATG_1	0.155702	0.257587	0.0519113	0.00625434	0.0726018	0.335191	0.051495	0.0692575
TGTGATGGTGGCAGAT_1	0.0166698	0.0369186	0.105184	0.351764	0.277923	0.188554	0.018087	0.00489968
TGTGCGGGTCGTGGAA_1	0.00531434	0.0439542	0.223996	0.0136943	0.632193	0.0147006	0.0584705	0.00767673
TGTGGCGAGCGCCATC_1	0.429501	0.0574316	0.0928216	0.0134016	0.0151163	0.375828	0.0100601	0.00583966
TGTGTGAGTCTTCATT_1	0.0141436	0.0843521	0.0301548	0.0156024	0.298074	0.0399643	0.415055	0.102654
TGTGTGATCAACTCTT_1	0.0543883	0.0802272	0.084408	0.00440255	0.117687	0.585821	0.0637451	0.00932088
TGTTCATAGGTAGTAT_1	0.193043	0.161034	0.0887829	0.0108192	0.0106594	0.527948	0.00498435	0.00272981
TGTTCATCAGAGTTGG_1	0.319689	0.38029	0.0677214	0.00260381	0.0269443	0.131912	0.0555214	0.0153178
TGTTCATGTAGTCCTA_1	0.0031996	0.0058121	0.0193004	0.00709568	0.716078	0.140585	0.0989162	0.00901277
TGTTCCGAGCTGTGCC_1	0.134342	0.0417155	0.106972	0.101227	0.440046	0.10504	0.0519107	0.0187481
TGTTCCGCACAAAGTA_1	0.0258368	0.0719885	0.10201	0.00109024	0.0438461	0.741085	0.0103405	0.00380319
TGTTCCGCATAGAGGC_1	0.000388444	0.000306253	0.00161436	0.00869389	0.087668	0.00765301	0.881255	0.0124206
TGTTCCGTCACCTCAC_1	0.0168308	0.359465	0.317879	0.00290294	0.0947534	0.181506	0.0254148	0.00124887
TGTTCCGTCATTACTC_1	0.0844284	0.0187507	0.0111666	0.0411749	0.558877	0.0236529	0.181974	0.0799757
TGTTCCGTCCCAAGCG_1	0.00807444	0.00348789	0.00506806	0.501169	0.450753	0.022329	0.00500587	0.00411298
TGTTCCGTCTATCGTT_1	0.176661	0.295039	0.0955947	0.0117772	0.347921	0.0238317	0.0297024	0.0194731
TGTTCTACAACTGAAA_1	0.000882898	0.00448641	0.0775138	0.0187723	0.119289	0.725552	0.0417997	0.011704
TGTTCTAGTATTTCGG_1	0.019709	0.010736	0.042106	0.0638913	0.242708	0.576794	0.0383034	0.0057522
TGTTCTATCCAACCGG_1	0.00690154	0.023053	0.222462	0.0056816	0.555891	0.141505	0.0402012	0.00430378
TGTTGAGAGTCACTGT_1	0.00741137	0.125264	0.765908	0.0127261	0.0269362	0.0508688	0.00589316	0.00499197
TGTTGAGCACTAACCA_1	0.00842452	0.0816885	0.281255	0.0248071	0.247172	0.337501	0.0134521	0.00570047
TGTTGGAAGAAACCCG_1	0.0239356	0.0158317	0.0581981	0.0618888	0.776514	0.0225289	0.0148492	0.0262535
TGTTGGACACGGCACT_1	0.0173226	0.504644	0.351385	0.0246491	0.0151446	0.0477532	0.0340033	0.00509741
TGTTGGACAGTCGGAA_1	0.589332	0.214732	0.0302887	0.013565	0.0382719	0.0880551	0.0141876	0.0115671
TGTTGGAGTTTGCAGT_1	0.0492783	0.0863017	0.262228	0.00349131	0.533156	0.0279769	0.0224702	0.0150975
TGTTGGATCGGTTCAA_1	0.0187248	0.0816362	0.0167639	0.0232684	0.729156	0.0560107	0.0716204	0.00281962
TGTTTGTGTATGCAAA_1	0.00234362	0.0201113	0.500332	0.00192038	0.0414741	0.413594	0.0196151	0.00060892
TGTTTGTTCAAGCTTG_1	0.00526515	0.0138758	0.207929	0.0104324	0.371046	0.364833	0.0248756	0.00174374
TTAATCCCACTTTATC_1	0.0141367	0.0505241	0.15249	0.00718153	0.235831	0.0356374	0.264591	0.239608
TTAATCCCAGTGGGTA_1	0.946324	0.0441518	0.00143168	0.000120274	0.000484378	0.00370492	0.000364135	0.00341862
TTACAGGCAACAAGAT_1	0.145299	0.00986017	0.0050878	0.199368	0.443798	0.104125	0.0325106	0.0599518
TTACAGGGTCGACTGC_1	0.272239	0.569134	0.0133916	0.00183839	0.00625754	0.109799	0.0217959	0.0055451
TTACAGGGTTGGACTT_1	0.0202949	0.00859881	0.00487341	0.0376578	0.0155742	0.0148647	0.0157477	0.882388
TTACCGCAGAGCTGCA_1	0.00150784	0.00148433	0.0142108	0.00338106	0.92912	0.0138009	0.0349919	0.00150354
TTACCGCGTGCCGAAA_1	0.42716	0.558717	0.00336985	0.000804786	0.00352653	0.00206129	0.00175143	0.00260915
TTACCGCTCCACGTGG_1	0.011049	0.0953274	0.0552217	0.00905843	0.109173	0.631128	0.0717905	0.0172523
TTACCGCTCGTTCGCT_1	0.00982149	0.0542304	0.0364735	0.247367	0.490533	0.0665963	0.0875758	0.00740233
TTACGCCAGCATCTTG_1	0.00608888	0.00871899	0.0347575	0.0213313	0.104505	0.45557	0.308368	0.060661
TTACGCCCAGCAGATG_1	0.0293609	0.0955883	0.423872	0.00864018	0.372156	0.0464481	0.0180613	0.00587315
TTACGCCTCTCTCTAA_1	0.0891845	0.280076	0.063658	0.0134799	0.0815539	0.439605	0.0184761	0.0139673
TTACGTTGTGGGTCAA_1	0.0219983	0.130089	0.0477554	0.293107	0.215684	0.131056	0.125886	0.0344247
TTACTGTCATTAGGCT_1	0.00582812	0.0243165	0.0488325	0.00961706	0.146136	0.5612	0.203196	0.00087343
TTACTGTGTGCCTGAC_1	0.0364639	0.961417	0.000733139	0.000247761	0.000231709	0.000218957	0.000204322	0.000482921
TTAGGGTAGGAGACCT_1	0.00365441	0.0399169	0.691482	0.075681	0.0466029	0.106572	0.0282289	0.00786126
TTAGGGTCAATCTCGA_1	0.0878793	0.064325	0.0629744	0.00337225	0.158557	0.533406	0.0429038	0.0465822
TTAGTCTCACAAGGTG_1	0.247135	0.74576	0.00119626	0.00150112	0.0011022	0.00109966	0.000928375	0.00127689
TTAGTCTCACGCTGTG_1	0.0559793	0.0425127	0.00817136	0.553353	0.273787	0.0305762	0.0220085	0.0136114
TTAGTCTCAGTCTGGC_1	0.00654388	0.00925411	0.0280646	0.0654949	0.809858	0.0632658	0.00949849	0.00801974
TTAGTCTTCTACGCGG_1	0.348692	0.034251	0.0574177	0.060893	0.136191	0.252677	0.0946138	0.0152646
TTATTGCAGACCAAGC_1	0.0152037	0.284232	0.158044	0.0112066	0.140132	0.280401	0.103863	0.00691765
TTATTGCAGTGTGTTC_1	0.717354	0.256436	0.00243973	0.00234678	0.00141787	0.0177443	0.00155162	0.000710254
TTATTGCCATGACACT_1	0.0163402	0.00372541	0.0142003	0.00302909	0.0701905	0.284928	0.54562	0.0619662
TTATTGCGTCACCGAC_1	0.0282565	0.297894	0.398822	0.00546955	0.214285	0.0383445	0.0112433	0.00568434
TTCAATCTCTCGCCTA_1	0.0267391	0.024679	0.0223402	0.61864	0.217866	0.0167046	0.0377862	0.0352451
TTCACCGAGCGTGAGT_1	0.0882041	0.0281638	0.0169357	0.0727196	0.462491	0.0950932	0.209244	0.0271482
TTCACCGCAAGTTCCA_1	0.111283	0.0971295	0.0492146	0.502642	0.0483562	0.0524442	0.0438007	0.0951302
TTCACCGTCCCTCGTA_1	0.054556	0.0178134	0.0393894	0.00742352	0.506217	0.139513	0.181564	0.0535239
TTCACGCTCACGATCA_1	0.0251117	0.656411	0.148689	0.00113722	0.0142493	0.123726	0.00659608	0.0240794
TTCAGGAAGCGCCCAT_1	0.540397	0.427965	0.00209787	0.000216512	0.00212942	0.0125875	0.00309672	0.0115104
TTCATGTAGCACGATG_1	0.00391982	0.00531252	0.0324515	0.0287405	0.222772	0.0860985	0.420092	0.200613
TTCATGTGTGTGACCC_1	0.00319407	0.00565008	0.665281	0.00097208	0.160395	0.121417	0.0333996	0.00969108
TTCATGTTCGAGTGAG_1	0.00227405	0.00430805	0.0249404	0.0347585	0.740746	0.0620205	0.106863	0.0240895
TTCATTGAGAGAGCCT_1	0.0120633	0.0743622	0.0843728	0.00778354	0.123141	0.405659	0.279668	0.0129495
TTCATTGGTAGGGTAC_1	0.0358419	0.0494827	0.0283535	0.422395	0.403872	0.00994865	0.0322464	0.0178594
TTCATTGTCTGGGCCA_1	0.114978	0.0116368	0.015117	0.505657	0.245694	0.070825	0.026005	0.0100876
TTCCAATCAATCCAGT_1	0.00385146	0.0476829	0.0378931	0.00398032	0.401909	0.0774799	0.414004	0.0131991
TTCCAATCAGGTACGA_1	0.722671	0.191634	0.000824943	0.000675222	0.00393769	0.0699745	0.00545913	0.00482419
TTCCACGCAAGACTGG_1	0.00191247	0.0363527	0.944748	0.000178316	0.0104815	0.00514061	0.000904775	0.000281458
TTCCACGGTTCATCTT_1	0.124355	0.0370701	0.00742119	0.0733923	0.476604	0.0426578	0.146956	0.0915433
TTCCGGTCAGAGTAAT_1	0.319985	0.597091	0.00201969	0.00358058	0.0119626	0.0315639	0.0323681	0.00142839
TTCCGGTGTCAGTCCG_1	0.0105125	0.254957	0.17597	0.000774046	0.0360656	0.505992	0.0141481	0.00158094
TTCCGGTTCAAGAATG_1	0.00120213	0.997668	0.000175707	9.3702e-05	0.000249717	9.78347e-05	0.000296784	0.000215895
TTCCGTGAGGAAAGTG_1	0.028187	0.13211	0.394558	0.00754049	0.097996	0.144315	0.162987	0.0323069
TTCCGTGGTACTCCGG_1	0.0148225	0.0335781	0.14792	0.0511074	0.531317	0.15873	0.0548549	0.0076702
TTCCTAAAGGATATAC_1	0.0352273	0.0317322	0.100307	0.0229457	0.116246	0.648381	0.0391086	0.00605116
TTCCTCTAGTGATTCC_1	0.00301938	0.0204586	0.135616	0.00111898	0.0435529	0.754309	0.0397044	0.00222107
TTCCTCTCAAGGTTGG_1	0.0027004	0.0112106	0.570155	0.0217676	0.312473	0.0667778	0.0131482	0.00176738
TTCCTTCGTCCATCTC_1	0.026138	0.0142496	0.0577759	0.193262	0.405736	0.140886	0.0986858	0.0632666
TTCGATTGTAGCTGTT_1	0.0276747	0.00966779	0.023166	0.034341	0.7447	0.0980797	0.039808	0.0225624
TTCGCTGCAGCACACC_1	0.00699998	0.125535	0.263986	0.175702	0.280962	0.116299	0.0254681	0.00504667
TTCGCTGGTTACCTGA_1	0.00129528	0.00624504	0.43213	0.0692113	0.386046	0.0804949	0.0135047	0.0110726
TTCGCTGTCATGCCAA_1	0.00788945	0.116955	0.372742	0.0149181	0.0956819	0.334902	0.0517884	0.00512327
TTCTAACAGACGCTCC_1	0.00229149	0.00619082	0.0590835	0.142008	0.663791	0.0637826	0.0612298	0.0016224
TTCTAACCAACGACAG_1	0.0188556	0.0211946	0.317606	0.00622785	0.0358197	0.229148	0.0223857	0.348762
TTCTAGTAGGATTTGA_1	0.0442894	0.0145476	0.0371207	0.0907891	0.356734	0.0543966	0.364089	0.0380338
TTCTAGTAGTGGATAT_1	0.00106397	0.0160473	0.973117	0.000805736	0.00517532	0.00330246	0.000250838	0.000237493
TTCTAGTCAAAGCGTG_1	0.0424992	0.0689761	0.0841065	0.0226748	0.154532	0.474122	0.143298	0.00979131
TTCTAGTTCTTAGCCC_1	0.00226927	0.00733035	0.0417329	0.0184961	0.671436	0.120957	0.135895	0.00188285
TTCTGTAAGGAGGCAG_1	0.0142241	0.91102	0.0226955	0.0099816	0.0335743	0.00202748	0.00231759	0.00415957
TTCTGTAGTATTGGCT_1	0.00939192	0.0201304	0.102677	0.0166991	0.241561	0.554378	0.0514128	0.00374971
TTCTGTATCAGTAGGG_1	0.00938239	0.101858	0.504653	0.00816115	0.0226317	0.328339	0.0127305	0.0122446
TTCTTCCGTTGTCTAG_1	0.00414322	0.0195788	0.0414537	0.240881	0.679493	0.0103783	0.00233687	0.00173465
TTCTTCCTCCCATGGG_1	0.0245196	0.153165	0.206435	0.0483582	0.40027	0.141701	0.0222433	0.0033082
TTCTTCCTCGCAGTTA_1	0.0242435	0.771898	0.0844919	0.00542752	0.00813882	0.0921655	0.00918053	0.00445399
TTCTTGAAGAGGTTTA_1	0.539536	0.0441585	0.00634462	0.138533	0.14862	0.0132247	0.0395829	0.0699993
TTCTTGACAAGTCATC_1	0.0183823	0.0408724	0.259388	0.0371138	0.268468	0.156919	0.0759467	0.142909
TTGAACGGTAAGCAAT_1	0.0112231	0.00486742	0.0157575	0.396289	0.32046	0.162646	0.0755781	0.0131786
TTGAACGGTACCTAGT_1	0.0426698	0.356429	0.118354	0.0383221	0.0409225	0.391017	0.00857231	0.00371464
TTGAACGTCTCCTGCA_1	0.0039185	0.00967043	0.0165614	0.0262435	0.899326	0.0323861	0.00603102	0.0058631
TTGACCCAGAGTGACC_1	0.00338617	0.111033	0.128467	0.00599579	0.132814	0.0950873	0.502876	0.0203399
TTGACCCAGTGATGGC_1	0.0042919	0.0170444	0.321981	0.00649615	0.42525	0.0774546	0.139725	0.00775719
[truncated: 982 more rows]

## Sheet: 2_SVM_predictions_mouse
	prob_coelEpi	prob_ovarianSurf	prob_preGC-II	prob_granulosa	prob_preGC-I	prob_sKITLG	prob_sLGR5	prob_sPAX8e
GSM4643732_E11.5gonad_AAACCTGAGTCCGTAT	0.00499096	0.0643015	0.053718	0.00290153	0.392522	0.468897	0.0114499	0.00121966
GSM4643732_E11.5gonad_AAACCTGGTAGAGTGC	0.507077	0.0280218	0.00670589	0.0243802	0.0186957	0.00597866	0.0211742	0.387967
GSM4643732_E11.5gonad_AAACCTGGTCTCCACT	0.0534303	0.0612109	0.0207639	0.00301008	0.125714	0.62061	0.0354844	0.0797756
GSM4643732_E11.5gonad_AAACCTGTCACGACTA	0.00569662	0.0135492	0.0196371	0.00104852	0.251898	0.658406	0.0492354	0.000529722
GSM4643732_E11.5gonad_AAACCTGTCGTTACAG	0.66683	0.0724698	0.024439	0.0103919	0.0675045	0.0964286	0.0248893	0.0370467
GSM4643732_E11.5gonad_AAACGGGGTTTGACTG	0.0914452	0.0352987	0.0183973	0.0447217	0.239194	0.069298	0.200889	0.300756
GSM4643732_E11.5gonad_AAAGATGTCGCTTGTC	0.000266634	0.0153379	0.00922386	2.71215e-05	0.00481588	0.969173	0.00114873	6.54686e-06
GSM4643732_E11.5gonad_AAAGCAAGTCAGAAGC	0.0802359	0.369709	0.0414132	0.00551747	0.0727341	0.405802	0.0180957	0.00649222
GSM4643732_E11.5gonad_AAAGCAAGTGTCGCTG	0.0267297	0.00995843	0.00104129	0.00337886	0.00327907	0.00170602	0.007064	0.946843
GSM4643732_E11.5gonad_AAAGTAGAGGGATACC	0.0165925	0.0835186	0.0649231	0.0242799	0.408184	0.115789	0.273867	0.0128462
GSM4643732_E11.5gonad_AAAGTAGCAGTTAACC	0.00439536	0.00119754	0.000540309	0.000917525	0.00508136	0.00225155	0.200119	0.785497
GSM4643732_E11.5gonad_AAATGCCGTATGGTTC	0.000276815	0.0119568	0.0407306	5.98518e-05	0.00233847	0.943729	0.00081781	9.06077e-05
GSM4643732_E11.5gonad_AACACGTCAGCTGCAC	0.600794	0.0282554	0.00547733	0.00922198	0.0219325	0.134795	0.10532	0.0942044
GSM4643732_E11.5gonad_AACACGTCATAGTAAG	0.00829595	0.0153075	0.0451572	0.000977977	0.0889407	0.839149	0.00191543	0.000256408
GSM4643732_E11.5gonad_AACACGTGTGTCCTCT	0.0824371	0.0253226	0.0101295	0.0288564	0.16243	0.498722	0.0368411	0.155262
GSM4643732_E11.5gonad_AACACGTTCAGCGACC	0.0673437	0.0407866	0.00602687	0.00075487	0.0207991	0.826832	0.00882386	0.0286335
GSM4643732_E11.5gonad_AACACGTTCTTAACCT	0.10626	0.0292806	0.00571972	0.088524	0.383888	0.252128	0.102404	0.0317951
GSM4643732_E11.5gonad_AACCATGGTACATGTC	0.0547906	0.013706	0.0430227	0.00282107	0.0530632	0.82055	0.0103842	0.00166243
GSM4643732_E11.5gonad_AACCATGTCATAAAGG	0.0215838	0.365566	0.0368468	0.00885597	0.0835678	0.308576	0.168494	0.00650981
GSM4643732_E11.5gonad_AACCATGTCATGGTCA	0.254936	0.478723	0.0136279	0.00190985	0.0364161	0.200549	0.0061146	0.0077225
GSM4643732_E11.5gonad_AACCGCGAGGCGATAC	0.00853884	0.241543	0.220352	0.00175862	0.208978	0.250735	0.0642292	0.00386482
GSM4643732_E11.5gonad_AACCGCGGTGGTCCGT	0.00422537	0.0643593	0.153183	0.00133244	0.146139	0.620155	0.00927748	0.00132839
GSM4643732_E11.5gonad_AACGTTGCATATACCG	0.0103503	0.00331435	0.00100115	0.000551754	0.851203	0.083031	0.0326219	0.0179269
GSM4643732_E11.5gonad_AACGTTGCATGCTAGT	0.0146932	0.0237363	0.048304	0.00917606	0.433586	0.37419	0.094259	0.00205505
GSM4643732_E11.5gonad_AACGTTGTCTTGAGAC	0.451466	0.0282251	0.00929011	0.0189156	0.0360032	0.0217874	0.0727039	0.361609
GSM4643732_E11.5gonad_AACTCAGAGTAAGTAC	3.86962e-06	4.88395e-05	1.16825e-05	5.09383e-06	0.0044825	0.00113132	0.994316	7.17809e-07
GSM4643732_E11.5gonad_AACTCAGCAGTCCTTC	0.000894966	0.0425002	0.039648	0.000286025	0.0417251	0.872224	0.00263278	8.92344e-05
GSM4643732_E11.5gonad_AACTCCCCACCAGGCT	0.968003	0.0106103	0.000727037	0.00103634	0.00396228	0.012421	0.00188962	0.00135064
GSM4643732_E11.5gonad_AACTCCCTCCTCAATT	0.194137	0.239398	0.0228825	0.0348561	0.054104	0.0385681	0.0380425	0.378011
GSM4643732_E11.5gonad_AACTCTTGTCAGCTAT	0.592615	0.121102	0.0396995	0.0112931	0.096408	0.0843402	0.0393984	0.0151441
GSM4643732_E11.5gonad_AACTCTTTCTTAGAGC	0.530553	0.0682054	0.0211685	0.00660794	0.0454266	0.318992	0.00538003	0.00366622
GSM4643732_E11.5gonad_AACTGGTGTTCAGACT	0.00624653	0.00661221	0.0060443	0.0260262	0.0729341	0.0187527	0.115571	0.747813
GSM4643732_E11.5gonad_AACTTTCAGTTCGCGC	0.566624	0.306056	0.00900441	0.0132298	0.0185675	0.0141448	0.0120992	0.0602742
GSM4643732_E11.5gonad_AACTTTCTCCCAAGTA	0.0296954	0.0309591	0.044683	0.00501146	0.272724	0.437172	0.131361	0.0483932
GSM4643732_E11.5gonad_AACTTTCTCTCGATGA	0.0877714	0.17496	0.0643177	0.00541388	0.149871	0.268259	0.239092	0.0103147
GSM4643732_E11.5gonad_AAGACCTAGGCTCATT	0.600156	0.0164597	0.00401512	0.00850913	0.0557634	0.253602	0.0290664	0.0324278
GSM4643732_E11.5gonad_AAGACCTTCGATCCCT	0.218914	0.181458	0.00831177	0.00773046	0.0672813	0.483877	0.0238784	0.00854892
GSM4643732_E11.5gonad_AAGCCGCAGATAGGAG	0.15	0.175375	0.070062	0.0400663	0.337705	0.0655221	0.121414	0.0398561
GSM4643732_E11.5gonad_AAGCCGCAGGCTAGGT	0.0686944	0.0632645	0.00532458	0.00385623	0.0568181	0.0695684	0.0165485	0.715925
GSM4643732_E11.5gonad_AAGCCGCTCGGAAACG	0.0537869	0.030677	0.00905687	0.00633038	0.235155	0.0378814	0.066106	0.561007
GSM4643732_E11.5gonad_AAGGAGCCAAGCCTAT	0.0340947	0.0513848	0.0246972	0.00813425	0.594622	0.162227	0.0640036	0.0608364
GSM4643732_E11.5gonad_AAGGAGCGTTTGTGTG	0.0904042	0.0197362	0.0107338	0.00034615	0.0112093	0.860526	0.00528862	0.00175566
GSM4643732_E11.5gonad_AAGGAGCTCTCAAACG	0.110652	0.176979	0.308028	0.00425927	0.224001	0.142624	0.0254341	0.00802261
GSM4643732_E11.5gonad_AAGGTTCAGCAAATCA	0.090494	0.0226454	0.0318669	0.0101327	0.14509	0.602988	0.091222	0.00556025
GSM4643732_E11.5gonad_AAGGTTCAGGACAGCT	0.0052793	0.043446	0.529323	0.0765233	0.145555	0.174809	0.0232687	0.00179594
GSM4643732_E11.5gonad_AAGGTTCAGGCTCATT	0.666326	0.0244412	0.00311474	0.00661205	0.0370328	0.0272208	0.00843141	0.226821
GSM4643732_E11.5gonad_AAGGTTCCAGTGAGTG	0.00329913	0.00565555	0.00456536	0.00188299	0.0696114	0.231841	0.681021	0.00212391
GSM4643732_E11.5gonad_AAGGTTCGTCTTCTCG	0.0671853	0.00841888	0.00752779	0.00407059	0.516325	0.0496404	0.0249682	0.321864
GSM4643732_E11.5gonad_AAGTCTGAGACCCACC	0.725966	0.0182666	0.00583272	0.0214337	0.0139035	0.00607571	0.0169257	0.191596
GSM4643732_E11.5gonad_AATCCAGCACACATGT	0.00823001	0.0433629	0.0476063	0.00676233	0.144176	0.289957	0.254566	0.205339
GSM4643732_E11.5gonad_AATCCAGGTCATCGGC	0.0586485	0.0132512	0.00636194	0.0176465	0.504159	0.246358	0.0569291	0.0966459
GSM4643732_E11.5gonad_AATCCAGTCATAGCAC	0.31396	0.235316	0.0364711	0.0141445	0.0856722	0.0723769	0.23577	0.00628887
GSM4643732_E11.5gonad_AATCCAGTCCTGCTTG	0.156149	0.216062	0.013532	0.00355166	0.012302	0.585463	0.00512822	0.00781262
GSM4643732_E11.5gonad_AATCGGTAGCTTCGCG	0.133407	0.0149018	0.000807772	5.12625e-05	0.00260503	0.847285	0.000800919	0.000141657
GSM4643732_E11.5gonad_AATCGGTAGTACCGGA	0.0480165	0.92915	0.00655481	0.00184134	0.00201511	0.00761646	0.00208397	0.00272128
GSM4643732_E11.5gonad_AATCGGTAGTTGCAGG	0.130324	0.0118966	0.0123868	0.0525084	0.260995	0.0950221	0.131045	0.305821
GSM4643732_E11.5gonad_AATCGGTCACCAGATT	0.0903982	0.02182	0.00488824	0.00609635	0.0229648	0.0474277	0.0271639	0.779241
GSM4643732_E11.5gonad_ACACCAACAACTGCGC	0.608916	0.0467039	0.00640017	0.10754	0.0831059	0.0919671	0.0110652	0.0443023
GSM4643732_E11.5gonad_ACACCAATCGTGGGAA	0.00058025	0.00489815	0.0319877	0.000430653	0.319572	0.631355	0.0105326	0.000643981
GSM4643732_E11.5gonad_ACACCCTAGTGCTGCC	0.567484	0.0204478	0.00500827	0.0301276	0.0123317	0.0195822	0.0137042	0.331314
GSM4643732_E11.5gonad_ACACTGACACCTATCC	0.70451	0.240194	0.00512587	0.000844218	0.00552286	0.0383029	0.00112516	0.0043754
GSM4643732_E11.5gonad_ACACTGAGTCTAAAGA	0.281483	0.227046	0.0126536	0.00309192	0.0337389	0.4268	0.00637428	0.00881212
GSM4643732_E11.5gonad_ACACTGAGTGCACGAA	0.0541406	0.10825	0.103815	0.00588041	0.0228033	0.679326	0.0217446	0.0040398
GSM4643732_E11.5gonad_ACACTGATCTAGAGTC	0.340907	0.0293489	0.0157816	0.025336	0.0863679	0.0120197	0.101575	0.388664
GSM4643732_E11.5gonad_ACAGCCGAGCGTGAAC	0.494821	0.0181967	0.00746601	0.00623737	0.152413	0.193117	0.0523639	0.0753851
GSM4643732_E11.5gonad_ACAGCCGGTAGGCTGA	0.001215	0.000363829	0.000267165	0.000703257	0.037029	0.00495744	0.058529	0.896935
GSM4643732_E11.5gonad_ACAGCCGGTGGCAAAC	0.641589	0.0297565	0.00686836	0.0321138	0.0195036	0.0083428	0.0215866	0.24024
GSM4643732_E11.5gonad_ACAGCCGGTTCGCTAA	0.803123	0.0221309	0.00277956	0.00464666	0.00622633	0.0211902	0.0038194	0.136084
GSM4643732_E11.5gonad_ACAGCTAAGTATCTCG	0.00483894	0.00463542	0.00433582	0.000138152	0.00687779	0.968799	0.00141951	0.00895553
GSM4643732_E11.5gonad_ACAGCTACATTAGCCA	0.00164847	0.0121263	0.0305946	0.000979251	0.157598	0.75824	0.037676	0.00113743
GSM4643732_E11.5gonad_ACATACGCATGCCCGA	0.508771	0.0236677	0.00623963	0.0135827	0.167799	0.0340659	0.060774	0.185099
GSM4643732_E11.5gonad_ACATCAGCACATTCGA	0.000170049	0.00362409	0.012215	4.58593e-05	0.0742963	0.904531	0.00510904	9.03646e-06
GSM4643732_E11.5gonad_ACATCAGGTAAAGTCA	0.057672	0.242503	0.0238838	0.00563826	0.324297	0.333502	0.00892429	0.00358028
GSM4643732_E11.5gonad_ACATCAGGTTAGTGGG	0.77265	0.0185971	0.00414587	0.017723	0.0758036	0.0152879	0.0109718	0.084821
GSM4643732_E11.5gonad_ACATCAGTCGTTTGCC	0.0452018	0.0341177	0.0175957	0.0042596	0.118422	0.182578	0.158008	0.439817
GSM4643732_E11.5gonad_ACATGGTCATCGATTG	0.000324668	0.00287303	0.0314866	0.000414119	0.141607	0.172874	0.650094	0.000327162
GSM4643732_E11.5gonad_ACATGGTTCTGCGGCA	0.834814	0.00774172	0.00209853	0.00661557	0.0110694	0.0101897	0.00688562	0.120585
GSM4643732_E11.5gonad_ACCAGTAAGTCAAGGC	0.866017	0.0172069	0.00390381	0.024136	0.0178132	0.0108924	0.012861	0.0471701
GSM4643732_E11.5gonad_ACCAGTAAGTTGTCGT	0.807735	0.054774	0.00211813	0.00353191	0.0075242	0.120742	0.00164057	0.00193421
GSM4643732_E11.5gonad_ACCAGTACAGCTATTG	0.490033	0.0412042	0.0205023	0.0653238	0.133082	0.0206095	0.082654	0.146591
GSM4643732_E11.5gonad_ACCCACTAGGCCGAAT	0.820044	0.0737428	0.00750396	0.00855174	0.00983715	0.0103337	0.00985255	0.0601338
GSM4643732_E11.5gonad_ACCCACTGTGGCCCTA	0.399799	0.359648	0.0198367	0.00159523	0.0194642	0.18107	0.00303702	0.0155504
GSM4643732_E11.5gonad_ACCCACTGTGGTCCGT	0.00113709	0.00920352	0.000956823	1.38744e-05	0.00325362	0.983929	0.00141323	9.30278e-05
GSM4643732_E11.5gonad_ACCCACTGTGTGAAAT	0.0409289	0.0143245	0.0277029	0.00398116	0.299199	0.347222	0.235364	0.0312782
GSM4643732_E11.5gonad_ACCGTAAAGTCAAGGC	0.124056	0.0290179	0.0180803	0.3608	0.17144	0.0649348	0.209416	0.0222549
GSM4643732_E11.5gonad_ACCGTAAAGTGCTGCC	0.361918	0.082769	0.0174946	0.0152281	0.0497091	0.018994	0.0403976	0.413489
GSM4643732_E11.5gonad_ACCGTAACAGGTCTCG	0.823135	0.0133099	0.00263351	0.00223321	0.0165271	0.111704	0.0232258	0.00723226
GSM4643732_E11.5gonad_ACCGTAAGTCGAAAGC	0.878412	0.0109202	0.00366403	0.0125707	0.00880043	0.00485761	0.00720986	0.0735656
GSM4643732_E11.5gonad_ACCTTTAAGTTACCCA	0.00221616	0.00162927	0.00299963	0.00124223	0.162586	0.0932474	0.731175	0.00490461
GSM4643732_E11.5gonad_ACCTTTAGTGTGGCTC	0.351914	0.0196953	0.0153428	0.0153896	0.129847	0.197463	0.191609	0.0787392
GSM4643732_E11.5gonad_ACCTTTATCTTGTACT	0.104057	0.0554489	0.0265589	0.0287713	0.121176	0.0430305	0.546824	0.0741336
GSM4643732_E11.5gonad_ACGAGCCAGCGAAGGG	8.25427e-06	8.19071e-05	0.000649483	2.70702e-06	0.00220958	0.991906	0.00512791	1.44589e-05
GSM4643732_E11.5gonad_ACGAGCCCAGGGATTG	0.858694	0.0603293	0.00995185	0.00723982	0.0192106	0.0149183	0.00569052	0.0239657
GSM4643732_E11.5gonad_ACGAGCCGTAAGTGGC	0.186387	0.0732701	0.062451	0.0130703	0.0950799	0.312005	0.156214	0.101522
GSM4643732_E11.5gonad_ACGAGCCTCATCTGCC	0.81957	0.142581	0.0026263	0.00434471	0.00889076	0.00936939	0.00280414	0.009814
GSM4643732_E11.5gonad_ACGAGCCTCGATGAGG	0.29811	0.0195938	0.00821292	0.027773	0.0248645	0.00593377	0.0318573	0.583655
GSM4643732_E11.5gonad_ACGAGGAAGGCGTACA	0.169985	0.0452683	0.00755884	0.00478739	0.56798	0.130302	0.0234109	0.050707
GSM4643732_E11.5gonad_ACGAGGATCCACTGGG	0.761327	0.0318851	0.00741255	0.0360414	0.0800806	0.0181511	0.0132792	0.0518228
GSM4643732_E11.5gonad_ACGATGTAGCTGAAAT	0.252922	0.0442015	0.0421725	0.0449176	0.258128	0.0280242	0.181605	0.148029
GSM4643732_E11.5gonad_ACGATGTCAATTGCTG	0.0677433	0.0581013	0.0279278	0.01072	0.231449	0.449784	0.147948	0.00632717
GSM4643732_E11.5gonad_ACGATGTCAGAGCCAA	0.00077552	0.0833211	0.0330989	3.66901e-05	0.0032432	0.879419	0.000103766	1.91311e-06
GSM4643732_E11.5gonad_ACGATGTTCACGCGGT	0.205848	0.0172876	0.0086266	0.0303422	0.0366001	0.0139418	0.0737107	0.613643
GSM4643732_E11.5gonad_ACGCAGCAGCCAGTTT	0.987368	0.00392742	0.00018564	2.41448e-05	0.000640547	0.00678111	0.000106184	0.000966854
GSM4643732_E11.5gonad_ACGCAGCTCATAAAGG	0.00224382	0.00665632	0.00571983	9.69311e-05	0.174166	0.805583	0.00550315	3.08921e-05
GSM4643732_E11.5gonad_ACGCCAGCACCATGTA	0.90162	0.00835902	0.00263215	0.000951434	0.00752366	0.074982	0.00138505	0.0025464
GSM4643732_E11.5gonad_ACGCCAGGTACCCAAT	0.0237955	0.0903535	0.0098169	6.95351e-05	0.00400139	0.871103	0.000589983	0.00027038
GSM4643732_E11.5gonad_ACGCCGAAGACGCAAC	0.00775046	0.0101433	0.00168602	0.000118522	0.00217271	0.975396	0.00226096	0.000472105
GSM4643732_E11.5gonad_ACGCCGAAGACTACAA	0.548739	0.0240341	0.00380024	0.00718688	0.0241964	0.338729	0.0173381	0.0359756
GSM4643732_E11.5gonad_ACGGAGAAGGTGCACA	0.454898	0.0442974	0.0156293	0.0392793	0.0588991	0.0507904	0.0922162	0.24399
GSM4643732_E11.5gonad_ACGGAGACACCGATAT	0.0138793	0.0132649	0.0521505	0.0169613	0.252555	0.0675567	0.161011	0.422622
GSM4643732_E11.5gonad_ACGGCCAAGTATCGAA	0.00431839	0.0558412	0.00822551	0.000193952	0.0050457	0.925282	0.000974961	0.000118477
GSM4643732_E11.5gonad_ACGGCCAGTGCAACTT	0.280662	0.0212042	0.00925181	0.0306018	0.0579737	0.0163765	0.116218	0.467711
GSM4643732_E11.5gonad_ACGGCCAGTTGATTGC	0.11599	0.0432224	0.0266626	0.00713044	0.0885221	0.112835	0.434058	0.17158
GSM4643732_E11.5gonad_ACGGCCATCAGTTGAC	0.0305727	0.0492339	0.0301157	0.0094029	0.265014	0.307324	0.298998	0.00933798
GSM4643732_E11.5gonad_ACGGCCATCCCTTGCA	0.660826	0.0298579	0.00576471	0.0208877	0.0201216	0.00807619	0.0161664	0.238299
GSM4643732_E11.5gonad_ACGGCCATCTTAGAGC	0.337134	0.441317	0.0533641	0.0140959	0.0287248	0.0621073	0.0342515	0.0290056
GSM4643732_E11.5gonad_ACGGGCTCAAGCCGTC	0.0335666	0.0152435	0.00651121	0.00510974	0.133424	0.0234215	0.39078	0.391944
GSM4643732_E11.5gonad_ACGGGCTTCAACTCTT	0.00356011	0.00459194	0.000526845	5.13733e-05	0.00396255	0.912255	0.00138139	0.0736709
GSM4643732_E11.5gonad_ACGGGCTTCCTTGGTC	0.379204	0.021737	0.00956692	0.0333603	0.0227152	0.00690918	0.0383617	0.488145
GSM4643732_E11.5gonad_ACGGGCTTCTGAGGGA	0.694841	0.0413842	0.0191767	0.0286425	0.032289	0.0865284	0.0246237	0.0725146
GSM4643732_E11.5gonad_ACGGGTCGTAAGTGGC	0.0247031	0.0133754	0.00585393	0.0160853	0.246799	0.552106	0.0828566	0.0582213
GSM4643732_E11.5gonad_ACGTCAAAGCCTTGAT	0.0723936	0.0152889	0.00739298	0.0160352	0.0381796	0.00586832	0.0369867	0.807855
GSM4643732_E11.5gonad_ACGTCAAAGTAGGTGC	0.00156548	0.00655011	0.0901114	0.00193474	0.297807	0.497201	0.10327	0.00156018
GSM4643732_E11.5gonad_ACTATCTAGAAACGCC	0.273691	0.0921741	0.0221213	0.0112647	0.114352	0.196535	0.17636	0.113502
GSM4643732_E11.5gonad_ACTATCTAGACTTGAA	0.134429	0.138275	0.060663	0.00878635	0.282948	0.187635	0.126192	0.0610724
GSM4643732_E11.5gonad_ACTATCTGTTGCTCCT	0.226486	0.030556	0.00829243	0.0126164	0.0489817	0.195323	0.0239829	0.453762
GSM4643732_E11.5gonad_ACTGAACAGAAGCCCA	0.832609	0.12163	0.00189635	0.000774416	0.00744285	0.0307001	0.00113014	0.00381697
GSM4643732_E11.5gonad_ACTGAACAGTGTGGCA	0.112746	0.0402969	0.00473756	0.00336359	0.214787	0.0136978	0.0552429	0.555128
GSM4643732_E11.5gonad_ACTGATGCAATCTACG	0.0131316	0.0203118	0.022634	0.00109736	0.121464	0.801026	0.0142773	0.00605803
GSM4643732_E11.5gonad_ACTGATGGTCCCTTGT	0.903236	0.0115516	0.00191187	0.0118821	0.0152715	0.0124956	0.00499628	0.0386556
GSM4643732_E11.5gonad_ACTGATGGTTGATTGC	0.929302	0.0293857	0.00371848	0.0103285	0.00955397	0.00908043	0.00260497	0.00602582
GSM4643732_E11.5gonad_ACTGATGTCTGGCGTG	0.0148681	0.0498593	0.0254523	0.00296457	0.167519	0.424958	0.312121	0.00225876
GSM4643732_E11.5gonad_ACTGATGTCTTCAACT	0.0232765	0.184378	0.0320372	0.00172318	0.0432113	0.707753	0.00706662	0.000553962
GSM4643732_E11.5gonad_ACTGCTCCATGAGCGA	0.00301974	0.104285	0.280897	0.00268648	0.201455	0.398071	0.008785	0.000800583
GSM4643732_E11.5gonad_ACTGTCCAGCCGTCGT	0.0545312	0.0409629	0.0404508	0.00551239	0.341311	0.399621	0.0924701	0.0251412
GSM4643732_E11.5gonad_ACTGTCCCAGGTCGTC	0.0047418	0.019968	0.0233481	0.00044797	0.0549283	0.870308	0.0259412	0.000316428
GSM4643732_E11.5gonad_ACTTACTTCGGAGCAA	0.14319	0.156007	0.0563599	0.0121934	0.306069	0.176883	0.142825	0.00647165
GSM4643732_E11.5gonad_ACTTGTTAGCTCCTTC	0.568298	0.0443665	0.0159675	0.00945979	0.0247146	0.0466815	0.0259074	0.264605
GSM4643732_E11.5gonad_ACTTGTTAGGCCCTTG	0.438173	0.0206875	0.00622941	0.0148333	0.0123685	0.00679776	0.0120498	0.488861
GSM4643732_E11.5gonad_ACTTGTTCAATGACCT	0.00682367	0.0534803	0.0612987	0.00190596	0.239759	0.280941	0.35385	0.00194124
GSM4643732_E11.5gonad_ACTTGTTCATCGGAAG	0.355234	0.0687538	0.0522407	0.102392	0.0709175	0.0644938	0.0329163	0.253052
GSM4643732_E11.5gonad_ACTTGTTCATGCTGGC	0.105477	0.131929	0.0229897	0.0065579	0.0202749	0.365619	0.338598	0.00855521
GSM4643732_E11.5gonad_ACTTTCAGTTCCCTTG	0.00899329	0.0116289	0.0110692	0.00526865	0.778071	0.0463511	0.133779	0.00483868
GSM4643732_E11.5gonad_AGAATAGCACCAGGCT	0.0466779	0.0115219	0.00254889	0.00337141	0.0516892	0.0190055	0.843625	0.0215597
GSM4643732_E11.5gonad_AGAATAGGTCGTCTTC	0.381926	0.455907	0.0138932	0.00395206	0.085058	0.0373526	0.0131678	0.00874289
GSM4643732_E11.5gonad_AGACGTTGTGTGCCTG	0.0902478	0.0861189	0.0268074	0.0170021	0.258867	0.144809	0.359229	0.0169179
GSM4643732_E11.5gonad_AGAGCGAAGTGGGATC	0.602758	0.0281931	0.00240593	0.0103319	0.170803	0.137501	0.0122273	0.0357795
GSM4643732_E11.5gonad_AGAGCGAAGTTCGCAT	8.10527e-05	0.00439882	0.48228	0.000145946	0.149431	0.362589	0.00100736	6.67691e-05
GSM4643732_E11.5gonad_AGAGCGACACAGTCGC	0.257689	0.0218442	0.0160583	0.0102398	0.0662314	0.346954	0.0772492	0.203734
GSM4643732_E11.5gonad_AGAGCGACACGGTAGA	0.802747	0.0728965	0.0121839	0.0037561	0.0223941	0.0632896	0.00850827	0.0142243
GSM4643732_E11.5gonad_AGAGCGACAGGTTTCA	0.0290828	0.0159443	0.00653024	0.00270353	0.0320938	0.0726721	0.81311	0.0278631
GSM4643732_E11.5gonad_AGAGCTTTCGGCGCTA	0.299835	0.0246809	0.00516846	0.012971	0.0216993	0.0419156	0.0150144	0.578715
GSM4643732_E11.5gonad_AGAGTGGAGGAATCGC	0.755635	0.0260056	0.0137134	0.00686362	0.0491855	0.0607123	0.0492438	0.0386412
GSM4643732_E11.5gonad_AGAGTGGCATGCCCGA	0.0735352	0.218437	0.0325364	0.018194	0.279585	0.204301	0.161183	0.0122298
GSM4643732_E11.5gonad_AGAGTGGCATTTCACT	0.00031839	0.00923619	0.100652	0.000345639	0.140391	0.747309	0.00153862	0.000208732
GSM4643732_E11.5gonad_AGATCTGCAAGGTTCT	0.00438213	0.0652789	0.0144939	0.0150038	0.478252	0.0410215	0.353032	0.0285364
GSM4643732_E11.5gonad_AGATCTGGTCAATGTC	0.95516	0.0225999	0.000907281	0.00052464	0.0018724	0.0170662	0.000701759	0.00116801
GSM4643732_E11.5gonad_AGATTGCTCACAACGT	0.921266	0.0119015	0.00279462	0.0139724	0.0147878	0.00557365	0.00856552	0.0211385
GSM4643732_E11.5gonad_AGATTGCTCGGAAATA	0.862947	0.0335929	0.00148131	0.00447767	0.0315766	0.0415867	0.00687194	0.0174661
GSM4643732_E11.5gonad_AGCATACCATGGAATA	0.907939	0.0447196	0.0042459	0.00826522	0.010342	0.0106744	0.00505625	0.00875803
GSM4643732_E11.5gonad_AGCATACGTCCAGTGC	0.324929	0.0161477	0.0100253	0.0236429	0.0206631	0.0234755	0.0249346	0.556182
GSM4643732_E11.5gonad_AGCCTAAAGAGCTTCT	0.719007	0.0412962	0.00838086	0.0198705	0.0836539	0.0785929	0.0298852	0.0193131
GSM4643732_E11.5gonad_AGCCTAAAGAGTGAGA	0.841143	0.0276686	0.00881602	0.0340071	0.0237605	0.034172	0.00734525	0.0230877
GSM4643732_E11.5gonad_AGCCTAAAGCACCGCT	0.00179995	0.0967782	0.151362	3.72211e-05	0.00708989	0.739233	0.00367073	2.88336e-05
GSM4643732_E11.5gonad_AGCCTAACATCCGCGA	0.238096	0.220522	0.00931267	0.0068161	0.303263	0.196127	0.00750172	0.0183612
GSM4643732_E11.5gonad_AGCCTAATCTACTTAC	0.447429	0.0802201	0.0116948	0.0102674	0.0846867	0.286675	0.0295578	0.0494697
GSM4643732_E11.5gonad_AGCGGTCAGCACAGGT	0.0362041	0.0705276	0.0079417	0.00686952	0.610365	0.0922973	0.0748064	0.100988
GSM4643732_E11.5gonad_AGCGGTCAGCGCTTAT	0.880669	0.0191697	0.00432998	0.00250676	0.0151294	0.043426	0.00863874	0.0261299
GSM4643732_E11.5gonad_AGCGGTCGTGTGCCTG	0.349539	0.21314	0.0376087	0.0025472	0.0177078	0.357863	0.0063356	0.0152583
GSM4643732_E11.5gonad_AGCGTATAGGGTCTCC	0.0117796	0.0707299	0.790443	0.00527978	0.0356275	0.0767106	0.00642249	0.0030072
GSM4643732_E11.5gonad_AGCGTATAGGTTCCTA	0.207612	0.0659097	0.0500693	0.0115206	0.0744179	0.444739	0.03024	0.115491
GSM4643732_E11.5gonad_AGCGTATCAAGCCCAC	0.128112	0.60564	0.058028	0.00173544	0.0169829	0.183979	0.00328269	0.00223985
GSM4643732_E11.5gonad_AGCGTATCAGGTCGTC	0.0159954	0.0147276	0.00515432	0.00366776	0.134616	0.718943	0.0549776	0.0519181
GSM4643732_E11.5gonad_AGCGTATGTCACACGC	0.971646	0.00143367	0.000208908	0.00043145	0.00338906	0.0186687	0.000861081	0.00336124
GSM4643732_E11.5gonad_AGCGTCGTCCATGCTC	0.275893	0.0575918	0.00555809	0.00403125	0.0511276	0.564507	0.00369749	0.0375934
GSM4643732_E11.5gonad_AGCTCCTCAAGAGTCG	0.0276849	0.114834	0.0672344	0.0128706	0.424346	0.176537	0.162642	0.01385
GSM4643732_E11.5gonad_AGCTCCTCACTTACGA	0.031259	0.15313	0.470172	0.0276269	0.19831	0.0822689	0.0295811	0.0076527
GSM4643732_E11.5gonad_AGCTCCTGTCTTGTCC	0.000605665	0.00288857	0.0310288	0.000188653	0.0465395	0.908521	0.0101016	0.000126613
GSM4643732_E11.5gonad_AGCTCTCCAACCGCCA	0.000400926	0.00994405	0.0130049	0.000146141	0.0380607	0.919365	0.0189606	0.000117292
GSM4643732_E11.5gonad_AGCTCTCGTGTTTGGT	0.0264563	0.0841961	0.0741262	0.0039142	0.134918	0.0569045	0.558389	0.0610959
GSM4643732_E11.5gonad_AGCTTGAAGGAACTGC	0.191049	0.0659197	0.0144201	0.0901044	0.0536089	0.0232897	0.0375586	0.524049
GSM4643732_E11.5gonad_AGCTTGAGTACCGAGA	0.00209545	0.698961	0.091917	0.00609944	0.084327	0.108778	0.00691876	0.000903105
GSM4643732_E11.5gonad_AGCTTGAGTTCTCATT	0.00307425	0.000595539	0.000559678	0.000843109	0.201987	0.00834746	0.0166348	0.767958
GSM4643732_E11.5gonad_AGGCCACAGTTAGCGG	8.411e-05	0.00175404	0.00967199	8.01595e-06	0.0155141	0.972248	0.00071384	6.15539e-06
GSM4643732_E11.5gonad_AGGCCACCACATAACC	0.0079089	0.98003	0.00418109	0.000145132	0.00190161	0.0016385	0.00402588	0.00016906
GSM4643732_E11.5gonad_AGGCCACTCTCGTTTA	0.283363	0.306325	0.0165031	0.0242959	0.156295	0.0528802	0.143677	0.0166603
GSM4643732_E11.5gonad_AGGCCGTGTGAAAGAG	0.881926	0.0534159	0.00329956	0.00255525	0.00845351	0.0366816	0.0071729	0.00649524
GSM4643732_E11.5gonad_AGGCCGTGTGCTAGCC	0.547284	0.017794	0.00632032	0.0275253	0.0163805	0.00790459	0.020243	0.356548
GSM4643732_E11.5gonad_AGGCCGTTCCAAGTAC	0.812268	0.0452525	0.00278152	0.00241033	0.0381409	0.0569414	0.0258152	0.0163907
GSM4643732_E11.5gonad_AGGGAGTAGCAGCCTC	0.0580097	0.0134425	0.00824529	0.18974	0.149346	0.0484149	0.0607495	0.472052
GSM4643732_E11.5gonad_AGGGATGAGATCCCAT	0.677406	0.0130748	0.00279743	0.00603627	0.107007	0.0534381	0.086523	0.0537176
GSM4643732_E11.5gonad_AGGGATGAGCGTAGTG	0.0134297	0.454745	0.412886	0.0102933	0.0291856	0.0151073	0.0402567	0.0240963
GSM4643732_E11.5gonad_AGGGATGAGTAAGTAC	0.00326107	0.0198142	0.122044	0.00449369	0.231738	0.305121	0.214341	0.0991876
GSM4643732_E11.5gonad_AGGGATGTCTTGTTTG	0.00104059	0.0121361	0.0464465	0.00442517	0.788411	0.11944	0.0241328	0.00396793
GSM4643732_E11.5gonad_AGGGTGAGTGAGGCTA	0.0554229	0.0255471	0.00409531	0.00939956	0.0115763	0.00653726	0.0165704	0.870851
GSM4643732_E11.5gonad_AGGTCCGAGGTCGGAT	0.0224843	0.0457866	0.0701096	0.00327154	0.502323	0.253112	0.0235358	0.079377
GSM4643732_E11.5gonad_AGGTCCGAGTCCCACG	0.726706	0.0489555	0.00329326	0.00116066	0.00763632	0.196369	0.00165523	0.0142241
GSM4643732_E11.5gonad_AGGTCCGGTCTCACCT	0.254608	0.0163039	0.00781513	0.0238264	0.031083	0.00653425	0.0360866	0.623743
GSM4643732_E11.5gonad_AGGTCCGTCCAGATCA	0.142882	0.10877	0.0893151	0.0127702	0.100262	0.424938	0.103435	0.0176282
GSM4643732_E11.5gonad_AGTCTTTAGTACGCGA	8.13091e-05	0.0118881	0.0261062	0.000361223	0.531319	0.41874	0.0100493	0.00145509
GSM4643732_E11.5gonad_AGTCTTTGTGCAACTT	0.314406	0.0585635	0.0473664	0.0353095	0.0593449	0.0223133	0.124784	0.337913
GSM4643732_E11.5gonad_AGTCTTTTCAAAGACA	0.0029975	0.00249801	0.00559212	0.00245475	0.326645	0.291704	0.366016	0.00209138
GSM4643732_E11.5gonad_AGTCTTTTCCATGCTC	0.00138051	0.0443132	0.108835	0.000981959	0.335278	0.430398	0.0780199	0.000793612
GSM4643732_E11.5gonad_AGTGAGGCATGCTAGT	0.0971377	0.0545258	0.0243068	0.0160691	0.25988	0.0428126	0.46965	0.0356185
GSM4643732_E11.5gonad_AGTGAGGGTGCGCTTG	0.0577204	0.0267464	0.00844854	0.0028542	0.042714	0.189372	0.0550515	0.617093
GSM4643732_E11.5gonad_AGTGGGAAGCCGCCTA	0.00989009	0.0601917	0.0359356	0.00142362	0.0912967	0.768674	0.0228094	0.00977887
GSM4643732_E11.5gonad_AGTGGGAGTCTACCTC	0.214967	0.0056451	0.000907602	0.000571872	0.00480576	0.772161	0.000826579	0.000114764
GSM4643732_E11.5gonad_AGTGGGAGTGTGACGA	0.0975908	0.0260603	0.0168695	0.0162481	0.130771	0.0363235	0.186775	0.489362
GSM4643732_E11.5gonad_AGTGGGATCAAGAAGT	0.0208619	0.0381517	0.016811	0.00579288	0.420689	0.0266024	0.346537	0.124554
GSM4643732_E11.5gonad_AGTTGGTAGAAGGGTA	0.735854	0.0114572	0.00418348	0.0093558	0.0151441	0.183312	0.00953697	0.0311564
GSM4643732_E11.5gonad_AGTTGGTAGCTCAACT	0.244182	0.0250321	0.00305551	0.000982184	0.0730419	0.589134	0.0097768	0.0547951
GSM4643732_E11.5gonad_AGTTGGTAGTATTGGA	0.679605	0.144843	0.0121235	0.00264136	0.0959029	0.0531051	0.00570499	0.00607407
GSM4643732_E11.5gonad_AGTTGGTCACGCATCG	0.039099	0.0521925	0.0108643	0.0142796	0.0932895	0.0651482	0.0467434	0.678384
GSM4643732_E11.5gonad_AGTTGGTTCCACGAAT	0.00881118	0.0102467	0.00439983	0.00426954	0.584143	0.177152	0.209267	0.00171073
GSM4643732_E11.5gonad_AGTTGGTTCCGTTGTC	0.41094	0.0710331	0.0168393	0.0168106	0.0881435	0.2825	0.100195	0.0135387
GSM4643732_E11.5gonad_ATAACGCAGGGAAACA	0.00162031	0.0278796	0.0283828	0.000101871	0.0329038	0.906276	0.00274843	8.70906e-05
GSM4643732_E11.5gonad_ATCACGAAGTGCAAGC	0.595053	0.0313919	0.0103038	0.0170401	0.0219562	0.214093	0.0247571	0.085405
GSM4643732_E11.5gonad_ATCACGACATTACGAC	0.460189	0.0615792	0.0221228	0.00961786	0.110198	0.121329	0.178382	0.0365818
GSM4643732_E11.5gonad_ATCACGAGTATGAATG	0.00765498	0.0149253	0.0094234	0.00151465	0.300293	0.382955	0.282089	0.00114445
GSM4643732_E11.5gonad_ATCATCTCATGGTAGG	0.0203566	0.00908839	0.00577252	0.0157102	0.431174	0.0146464	0.062507	0.440744
GSM4643732_E11.5gonad_ATCATCTGTCTTTCAT	0.247741	0.0462	0.0149899	0.0133127	0.450392	0.0943669	0.11515	0.017847
GSM4643732_E11.5gonad_ATCATGGGTCTCTCGT	0.00282323	0.945757	0.0166428	0.000222081	0.000522381	0.0337541	0.000270036	8.0519e-06
GSM4643732_E11.5gonad_ATCATGGTCTGGCGAC	0.14911	0.00609666	0.00233891	0.0107813	0.0153371	0.00964772	0.0103162	0.796372
GSM4643732_E11.5gonad_ATCCACCAGCTGAACG	0.549961	0.0567368	0.0169406	0.0150232	0.0431166	0.194149	0.0143632	0.109709
GSM4643732_E11.5gonad_ATCCACCAGTCATGCT	0.000518286	0.0591581	0.0609662	0.00030144	0.0274461	0.848195	0.00323638	0.000178497
GSM4643732_E11.5gonad_ATCCACCGTAAGTAGT	0.0641039	0.155714	0.0262271	0.00690843	0.194974	0.214229	0.330633	0.00721022
GSM4643732_E11.5gonad_ATCCACCTCAGTGCAT	0.0352122	0.00740364	0.001387	0.000710436	0.0111862	0.777174	0.00305683	0.163869
GSM4643732_E11.5gonad_ATCCGAAAGGACACCA	0.566206	0.0609308	0.0191523	0.0229707	0.0790775	0.0570333	0.098392	0.0962369
GSM4643732_E11.5gonad_ATCTACTCATTTGCCC	0.877039	0.070708	0.00335434	0.00705828	0.0120394	0.00676812	0.00679927	0.0162341
GSM4643732_E11.5gonad_ATCTACTTCACCAGGC	0.0716607	0.0408982	0.0186198	0.29396	0.106629	0.0988691	0.103896	0.265467
GSM4643732_E11.5gonad_ATCTGCCGTAGTACCT	0.539465	0.277601	0.00556834	0.00143691	0.0996502	0.0515887	0.0116779	0.0130116
GSM4643732_E11.5gonad_ATGAGGGAGACCTTTG	0.000933982	0.00264784	0.000567574	0.000468427	0.00163381	0.00204519	0.00141994	0.990283
GSM4643732_E11.5gonad_ATGAGGGCACCGATAT	0.154966	0.0611231	0.0140314	0.00995471	0.313421	0.192256	0.237163	0.0170845
GSM4643732_E11.5gonad_ATGAGGGTCAACACTG	0.00035814	0.0246695	0.0349286	0.00182674	0.786934	0.137639	0.0133934	0.000250511
GSM4643732_E11.5gonad_ATGAGGGTCCGTTGCT	0.865607	0.0618493	0.0048823	0.00456649	0.00753677	0.0404905	0.00326353	0.0118039
GSM4643732_E11.5gonad_ATGAGGGTCGGAGGTA	0.0303452	0.0672206	0.0136447	0.00469574	0.0414019	0.0196297	0.146932	0.67613
GSM4643732_E11.5gonad_ATGCGATAGCTGCAAG	0.71247	0.0845533	0.0170435	0.00376308	0.00947845	0.144013	0.00776615	0.0209128
GSM4643732_E11.5gonad_ATGCGATCACTAAGTC	0.345946	0.114963	0.0730922	0.0287512	0.10029	0.107882	0.12077	0.108305
GSM4643732_E11.5gonad_ATGCGATCAGACGCCT	0.0015807	0.0392062	0.00707613	6.02808e-05	0.018013	0.930987	0.0030311	4.51002e-05
GSM4643732_E11.5gonad_ATGCGATGTAGAAAGG	0.783158	0.0297375	0.00698013	0.0216102	0.0277748	0.0128428	0.0270909	0.0908057
GSM4643732_E11.5gonad_ATGCGATGTAGCGATG	0.0113668	0.0243454	0.0484088	0.00259549	0.151242	0.388231	0.364185	0.00962505
GSM4643732_E11.5gonad_ATGCGATTCACGAAGG	0.0266604	0.00797737	0.0522785	0.00753392	0.0986507	0.180258	0.088582	0.538059
GSM4643732_E11.5gonad_ATGCGATTCTAGCACA	0.680125	0.00742073	0.00294312	0.0194806	0.0147039	0.0161957	0.0110264	0.248105
GSM4643732_E11.5gonad_ATGGGAGCATATGCTG	0.261091	0.18989	0.0358641	0.0109018	0.106524	0.294837	0.0620244	0.0388665
GSM4643732_E11.5gonad_ATGGGAGGTAAGGGAA	0.00760933	0.0507179	0.489162	0.0185715	0.167432	0.206911	0.0565039	0.00309272
GSM4643732_E11.5gonad_ATGTGTGAGACGCACA	0.617847	0.0751419	0.00970194	0.00864364	0.0146272	0.266426	0.00395382	0.00365903
GSM4643732_E11.5gonad_ATGTGTGGTGCTTCTC	0.158678	0.272434	0.0437411	0.00902273	0.190899	0.163052	0.048795	0.113378
GSM4643732_E11.5gonad_ATGTGTGTCAAACCGT	0.00756103	0.0177712	0.0373548	0.00296656	0.422436	0.0707708	0.435752	0.00538775
GSM4643732_E11.5gonad_ATTACTCAGGTAGCCA	0.403653	0.0561652	0.0284509	0.0429231	0.0693125	0.0198334	0.0791405	0.300521
GSM4643732_E11.5gonad_ATTACTCCAAGCCCAC	0.292334	0.0608325	0.00700016	0.0010731	0.0447643	0.581785	0.010901	0.00131008
GSM4643732_E11.5gonad_ATTACTCTCAGCGATT	0.883442	0.00785188	0.00213325	0.00660416	0.0100525	0.0278515	0.00854576	0.0535195
GSM4643732_E11.5gonad_ATTACTCTCGTACGGC	0.00035899	0.00237528	0.00490506	4.21935e-05	0.0220246	0.968908	0.00127798	0.000108273
GSM4643732_E11.5gonad_ATTATCCTCTTCGGTC	0.080672	0.0225727	0.00704962	0.0445178	0.134091	0.227845	0.0499214	0.433331
GSM4643732_E11.5gonad_ATTCTACCACACCGCA	0.000416122	0.998265	0.000968086	1.22419e-05	8.38097e-05	0.000204347	4.85562e-05	2.16478e-06
GSM4643732_E11.5gonad_ATTCTACCATACGCCG	0.066804	0.0204115	0.0147363	0.00167446	0.0947273	0.787291	0.00894672	0.00540855
GSM4643732_E11.5gonad_ATTCTACGTCCAGTTA	0.127329	0.0362819	0.0236689	0.0351761	0.126923	0.0165551	0.12401	0.510055
GSM4643732_E11.5gonad_ATTGGACAGCGGCTTC	0.305663	0.0145807	0.00597812	0.00501769	0.0517134	0.185619	0.12738	0.304049
GSM4643732_E11.5gonad_ATTGGACCATGAGCGA	0.431454	0.00996672	0.0102013	0.000871438	0.0343959	0.481823	0.0234479	0.0078396
GSM4643732_E11.5gonad_ATTGGACCATTTCAGG	0.000864497	0.0139515	0.10985	0.0233087	0.648884	0.201296	0.00168132	0.000163879
GSM4643732_E11.5gonad_ATTGGACTCTTTCCTC	0.0355773	0.017947	0.0396327	0.00785736	0.166574	0.55865	0.101842	0.0719202
GSM4643732_E11.5gonad_ATTGGTGGTTCGTTGA	0.576748	0.381149	0.0102255	0.00216622	0.00268195	0.0219734	0.00323463	0.00182109
GSM4643732_E11.5gonad_ATTGGTGTCCTTGGTC	0.00350062	0.0153414	0.128492	0.00249015	0.738115	0.0640055	0.0468296	0.00122568
GSM4643732_E11.5gonad_ATTTCTGAGACTACAA	5.06735e-05	1.06248e-05	3.62655e-05	5.18407e-06	0.00200001	0.997208	0.000378247	0.000310862
GSM4643732_E11.5gonad_ATTTCTGGTGAGGCTA	0.00460976	0.00912057	0.0236232	0.00104366	0.313283	0.607519	0.0402969	0.000503086
GSM4643732_E11.5gonad_CAACCAACACCGAATT	0.648279	0.0294678	0.0147821	0.0142669	0.0416657	0.0900137	0.105326	0.0561994
GSM4643732_E11.5gonad_CAACCAAGTTTGCATG	0.310085	0.0260564	0.00978803	0.00721392	0.191752	0.0299307	0.029522	0.395651
GSM4643732_E11.5gonad_CAACCAATCCGAACGC	0.00198363	0.159994	0.241246	0.000268045	0.00718052	0.58864	0.000682951	4.16764e-06
GSM4643732_E11.5gonad_CAACCTCAGAGAACAG	0.0123457	0.0102667	0.0156467	0.0112608	0.658227	0.123969	0.159883	0.0084018
GSM4643732_E11.5gonad_CAACCTCAGGCATGTG	0.00620417	0.0192872	0.031683	0.00351226	0.286108	0.263336	0.371541	0.0183275
GSM4643732_E11.5gonad_CAACTAGAGGAATCGC	0.0259459	0.0166827	0.00740939	0.00115202	0.0210704	0.917821	0.0029173	0.00700125
GSM4643732_E11.5gonad_CAACTAGGTCGCTTTC	0.00980626	0.0857994	0.0409319	0.00263097	0.30241	0.0503402	0.492571	0.0155104
GSM4643732_E11.5gonad_CAAGAAACAGTTCCCT	0.00325238	0.0276828	0.0243569	0.000669028	0.14582	0.764626	0.0333192	0.000273709
GSM4643732_E11.5gonad_CAAGAAAGTTATCGGT	0.0574059	0.0218696	0.00739812	0.0031886	0.14608	0.384754	0.0897638	0.28954
GSM4643732_E11.5gonad_CAAGATCAGTGCTGCC	0.746811	0.0209819	0.00661802	0.00342429	0.0425585	0.114255	0.0505332	0.0148187
GSM4643732_E11.5gonad_CAAGATCGTCTAGAGG	0.00303272	0.0795498	0.112707	0.00283396	0.399541	0.362057	0.0387003	0.00157838
GSM4643732_E11.5gonad_CAAGATCTCCACGTTC	0.640945	0.121715	0.0208284	0.0401041	0.0228415	0.0724784	0.0142524	0.0668349
GSM4643732_E11.5gonad_CAAGGCCCACCAGCAC	0.00184723	0.00444389	0.0102483	0.00244121	0.0136155	0.0221425	0.0075721	0.937689
GSM4643732_E11.5gonad_CAAGGCCGTAAATACG	0.336237	0.0699109	0.0202939	0.039463	0.100442	0.0450478	0.0977193	0.290886
GSM4643732_E11.5gonad_CAAGGCCGTCCGAACC	0.046193	0.084425	0.0693561	0.012402	0.166144	0.169765	0.350978	0.100737
GSM4643732_E11.5gonad_CAAGTTGAGATAGCAT	0.000454567	0.0229981	0.0137389	8.57564e-05	0.0165923	0.940964	0.00455409	0.000611886
GSM4643732_E11.5gonad_CAAGTTGAGCATGGCA	0.0102284	0.0174291	0.0173109	0.00464054	0.143107	0.183367	0.617097	0.00682027
GSM4643732_E11.5gonad_CAAGTTGAGCTAACTC	0.369207	0.11804	0.0357692	0.00596052	0.117697	0.269586	0.065827	0.0179128
GSM4643732_E11.5gonad_CAAGTTGAGGCGATAC	0.0102446	0.0366294	0.0184218	0.899081	0.0181046	0.0108348	0.00423442	0.00244971
GSM4643732_E11.5gonad_CAAGTTGAGGGCATGT	0.0581503	0.0262046	0.00707465	0.00876461	0.0438382	0.0277262	0.0720721	0.756169
GSM4643732_E11.5gonad_CACAAACCACGGTAGA	0.031301	0.00712802	0.00339729	0.00105386	0.00778105	0.0396613	0.00189232	0.907785
GSM4643732_E11.5gonad_CACAAACCAGGCAGTA	0.0994671	0.00901684	0.00381339	0.00582555	0.0110221	0.134665	0.00624321	0.729947
GSM4643732_E11.5gonad_CACAAACGTGTTGAGG	0.000612942	0.0273512	0.294986	0.00509921	0.15017	0.50786	0.0134383	0.000482331
GSM4643732_E11.5gonad_CACAAACTCCGTTGCT	1.6525e-06	8.75082e-05	2.31204e-05	2.44249e-06	0.000114776	0.00101344	0.000211656	0.998545
GSM4643732_E11.5gonad_CACACAAAGCGAAGGG	0.371431	0.0162801	0.00630759	0.0140086	0.020996	0.0467138	0.0342124	0.49005
GSM4643732_E11.5gonad_CACACAAGTATAGGGC	0.0431591	0.00424083	0.00123637	0.00135046	0.0660158	0.841524	0.010279	0.0321948
GSM4643732_E11.5gonad_CACACAAGTATGAAAC	0.000508611	0.0026617	0.00601756	0.000136512	0.106591	0.842534	0.0345942	0.00695616
GSM4643732_E11.5gonad_CACACCTCAATGGAAT	0.443883	0.199664	0.0315825	0.00945824	0.0793545	0.216334	0.00916728	0.0105568
GSM4643732_E11.5gonad_CACACCTCAGGTCTCG	0.593494	0.0322708	0.0110107	0.0309799	0.0468802	0.02457	0.0925824	0.168212
GSM4643732_E11.5gonad_CACACCTTCCAAGCCG	0.0899798	0.0776285	0.0399581	0.00398601	0.662917	0.0896446	0.0329202	0.00296604
GSM4643732_E11.5gonad_CACACTCAGTTACCCA	0.00641536	0.00510113	0.00204772	0.000800223	0.00454572	0.022069	0.00544614	0.953575
GSM4643732_E11.5gonad_CACACTCCAACCGCCA	0.169303	0.108237	0.037314	0.0532675	0.0768666	0.0409492	0.0683968	0.445666
GSM4643732_E11.5gonad_CACACTCCACCAGTTA	0.928211	0.014355	0.00386726	0.0168305	0.0094375	0.00966857	0.00546453	0.012166
GSM4643732_E11.5gonad_CACACTCCATTAACCG	0.0430739	0.0876632	0.0136711	0.0070847	0.770842	0.0117038	0.0496153	0.016346
GSM4643732_E11.5gonad_CACACTCGTTTAGGAA	0.021034	0.0117119	0.0060856	0.0100435	0.329288	0.0220314	0.136015	0.46379
GSM4643732_E11.5gonad_CACAGGCTCAGGTAAA	0.229115	0.01609	0.006634	0.0274834	0.0177728	0.00530992	0.0359423	0.661653
GSM4643732_E11.5gonad_CACATTTAGATGCCAG	0.000717966	0.00337734	0.18266	0.00104278	0.237701	0.566401	0.00713831	0.000961659
GSM4643732_E11.5gonad_CACCACTTCGCGTTTC	0.419776	0.428583	0.00699875	0.000971884	0.0110697	0.122238	0.00417484	0.00618718
GSM4643732_E11.5gonad_CACCAGGCACGACGAA	0.583221	0.184673	0.00381311	0.0240195	0.0570101	0.134369	0.00330744	0.00958752
GSM4643732_E11.5gonad_CACCAGGCAGTGGGAT	0.124612	0.0155016	0.00887348	0.0179112	0.0598739	0.0116671	0.125385	0.636176
GSM4643732_E11.5gonad_CACCTTGAGAGGTAGA	0.207931	0.151669	0.0144972	0.225044	0.152781	0.109869	0.0728272	0.0653813
GSM4643732_E11.5gonad_CACCTTGAGATATGCA	0.839501	0.00604939	0.00206433	0.0102831	0.0243149	0.00799622	0.010662	0.0991289
GSM4643732_E11.5gonad_CACCTTGCACGAAAGC	0.488405	0.014354	0.00366883	0.00352072	0.017732	0.083387	0.0309034	0.358029
GSM4643732_E11.5gonad_CACCTTGGTCATCGGC	0.176236	0.099007	0.125925	0.0191714	0.147017	0.0866939	0.088181	0.257769
GSM4643732_E11.5gonad_CACCTTGGTCCGAGTC	0.0501333	0.0209474	0.00438202	0.0112657	0.25106	0.0160046	0.0537988	0.592408
GSM4643732_E11.5gonad_CACTCCAAGCTACCGC	0.0980036	0.27377	0.0290896	0.00516981	0.102955	0.422474	0.0515754	0.0169626
GSM4643732_E11.5gonad_CACTCCAGTAATCGTC	0.167798	0.0333826	0.00123523	0.000293023	0.00364474	0.791995	0.000950295	0.000701164
GSM4643732_E11.5gonad_CAGAATCAGCCCAGCT	0.772646	0.0185138	0.00589466	0.0144164	0.0450163	0.015811	0.031238	0.0964638
GSM4643732_E11.5gonad_CAGAATCAGCCGGTAA	0.45895	0.343676	0.0160608	0.00516615	0.0114532	0.149296	0.00575254	0.00964599
GSM4643732_E11.5gonad_CAGAATCAGTATCTCG	0.49345	0.0809411	0.0100416	0.00306027	0.0227495	0.18212	0.0215421	0.186096
GSM4643732_E11.5gonad_CAGAATCCACGCCAGT	0.0119029	0.0229349	0.00470943	0.000470387	0.0365742	0.796518	0.00782995	0.11906
GSM4643732_E11.5gonad_CAGAATCGTACGCACC	0.0865439	0.051605	0.0567604	0.00682223	0.171813	0.452654	0.165995	0.00780606
GSM4643732_E11.5gonad_CAGAATCTCCGTAGGC	0.131108	0.162061	0.026503	0.0111683	0.219569	0.280404	0.161409	0.00777771
GSM4643732_E11.5gonad_CAGAGAGGTGACAAAT	0.62078	0.0725616	0.0170059	0.00644157	0.0777512	0.177171	0.0107908	0.0174978
GSM4643732_E11.5gonad_CAGAGAGGTTCCACGG	0.332801	0.00983328	0.000508964	1.20351e-05	0.0014334	0.65297	0.000414523	0.00202739
GSM4643732_E11.5gonad_CAGAGAGTCAACGGGA	0.540393	0.229376	0.0172201	0.0098534	0.0332287	0.159206	0.00632937	0.00439325
GSM4643732_E11.5gonad_CAGAGAGTCCGGCACA	0.0444245	0.00564595	0.0021134	0.00735088	0.0187516	0.0141692	0.0137033	0.893841
GSM4643732_E11.5gonad_CAGATCACATTAGCCA	0.549545	0.119607	0.00893386	0.00482691	0.00700871	0.301768	0.00365674	0.00465442
GSM4643732_E11.5gonad_CAGCAGCAGCGCTTAT	0.885151	0.0109124	0.00363203	0.0258103	0.0141772	0.031313	0.0142346	0.0147692
GSM4643732_E11.5gonad_CAGCAGCTCAGCATGT	0.00295632	0.0129998	0.0100743	0.000817735	0.0316633	0.94107	0.000341008	7.72081e-05
GSM4643732_E11.5gonad_CAGCAGCTCTTTACAC	0.00778666	0.00116903	0.00166204	7.99047e-05	0.00315198	0.981279	0.000822452	0.00404901
GSM4643732_E11.5gonad_CAGCATAAGGCTAGCA	0.502143	0.244196	0.0121255	0.00181528	0.124711	0.0671556	0.00703305	0.0408193
GSM4643732_E11.5gonad_CAGCATACAAGCTGGA	0.351654	0.00326767	0.000291395	0.000813698	0.0149272	0.0224689	0.0163725	0.590205
GSM4643732_E11.5gonad_CAGCATACACACATGT	0.000279991	0.00894467	0.00939424	7.1466e-05	0.0344005	0.944653	0.00219485	6.07969e-05
GSM4643732_E11.5gonad_CAGCATAGTGAAGGCT	0.0284481	0.0467395	0.0166308	0.00670971	0.302326	0.366694	0.210967	0.0214854
GSM4643732_E11.5gonad_CAGCATAGTTTGACTG	0.829016	0.0116123	0.00075386	0.00252865	0.00469479	0.138919	0.00254664	0.00992851
GSM4643732_E11.5gonad_CAGCATATCCCAACGG	0.0506841	0.0417328	0.0577227	0.0196324	0.251751	0.289937	0.0801848	0.208355
GSM4643732_E11.5gonad_CAGCATATCGGTGTTA	0.945244	0.0130542	0.00321838	0.0084006	0.00792291	0.00881245	0.00576917	0.00757823
GSM4643732_E11.5gonad_CAGCCGATCCAGTAGT	0.233422	0.117873	0.0229451	0.0218534	0.197756	0.239755	0.149777	0.0166187
GSM4643732_E11.5gonad_CAGCGACCATACTCTT	0.0525045	0.071016	0.0434214	0.0144773	0.295152	0.415884	0.10077	0.00677602
GSM4643732_E11.5gonad_CAGCGACGTACGAAAT	0.041914	0.0046424	0.00306191	0.00416294	0.0297799	0.883646	0.00793335	0.0248597
GSM4643732_E11.5gonad_CAGCGACTCGAGCCCA	0.0276598	0.0390288	0.0130971	0.00223083	0.160508	0.751708	0.00548743	0.000280041
GSM4643732_E11.5gonad_CAGCTAAAGGATGGAA	0.00887765	0.0288915	0.0647301	0.00783287	0.417738	0.345795	0.112352	0.0137831
GSM4643732_E11.5gonad_CAGCTAAAGTTTGCGT	0.70542	0.102375	0.0124354	0.00991209	0.0476011	0.054071	0.020908	0.0472767
GSM4643732_E11.5gonad_CAGCTGGCAGTACACT	0.960221	0.00549231	0.00127134	0.00298712	0.00945485	0.0116174	0.00411769	0.00483854
GSM4643732_E11.5gonad_CAGCTGGCATCAGTAC	0.897211	0.0614204	0.00257424	0.00738686	0.0118167	0.0133374	0.00148312	0.00477048
GSM4643732_E11.5gonad_CAGCTGGTCTCAACTT	0.0177908	0.0934981	0.222757	0.00212123	0.0625563	0.507788	0.0883236	0.00516421
GSM4643732_E11.5gonad_CAGGTGCAGAGGTTGC	0.350679	0.0539661	0.0113079	0.002632	0.0305386	0.489671	0.0374161	0.0237897
GSM4643732_E11.5gonad_CAGGTGCAGAGTCTGG	0.889915	0.0168616	0.000745864	0.00191246	0.0141826	0.073664	0.000505793	0.00221251
GSM4643732_E11.5gonad_CAGGTGCCAAAGAATC	0.927571	0.0243854	0.00206225	0.00328471	0.00217697	0.0292745	0.00234263	0.00890294
GSM4643732_E11.5gonad_CAGTAACCAATCTACG	0.790851	0.0259891	0.00308521	0.00250523	0.00579225	0.15892	0.00221719	0.0106405
GSM4643732_E11.5gonad_CAGTAACTCATCATTC	0.0757343	0.0826936	0.0256202	0.00520497	0.0305116	0.140471	0.0353448	0.604419
GSM4643732_E11.5gonad_CAGTCCTGTCTAGGTT	0.666352	0.013528	0.00587214	0.0259549	0.026405	0.0227817	0.0237046	0.215402
GSM4643732_E11.5gonad_CAGTCCTTCAGGTTCA	0.000909349	0.0990114	0.0466922	0.00148037	0.132544	0.713893	0.00499915	0.00047077
GSM4643732_E11.5gonad_CATATGGAGAAGGTTT	0.0557846	0.0163591	0.0120824	0.0111792	0.107825	0.0431835	0.119037	0.63455
GSM4643732_E11.5gonad_CATATGGAGGAGTAGA	0.000480584	0.0878415	0.0466125	8.77617e-05	0.0175062	0.842353	0.00506334	5.47474e-05
GSM4643732_E11.5gonad_CATATGGCACCTTGTC	0.0675145	0.0867758	0.0494955	0.00686003	0.364502	0.214644	0.0832606	0.126948
GSM4643732_E11.5gonad_CATATGGGTCTCTCGT	0.161741	0.017453	0.0057784	0.0178414	0.0285491	0.0654209	0.0301894	0.673027
GSM4643732_E11.5gonad_CATATTCGTTATGTGC	0.385432	0.0310086	0.00559916	0.0146643	0.017342	0.0149817	0.0367323	0.49424
GSM4643732_E11.5gonad_CATCAAGAGAGTGACC	0.0437616	0.0836057	0.0254375	0.0136527	0.101636	0.0889823	0.6299	0.0130248
GSM4643732_E11.5gonad_CATCAAGAGCGAAGGG	0.558976	0.282814	0.00422192	0.000895327	0.00310607	0.147047	0.00156931	0.00137068
GSM4643732_E11.5gonad_CATCAAGCATATGCTG	0.852879	0.0252246	0.00169339	0.00155138	0.0486285	0.0576935	0.00416226	0.00816769
GSM4643732_E11.5gonad_CATCAAGTCTAAGCCA	0.0889264	0.0925379	0.0351153	0.0759353	0.201019	0.137864	0.235699	0.132903
GSM4643732_E11.5gonad_CATCAGACAGACAAGC	0.691497	0.0230854	0.00900855	0.0221156	0.015824	0.0206607	0.0188452	0.198964
GSM4643732_E11.5gonad_CATCCACGTGAGGCTA	0.000172416	0.00187709	0.0190183	0.000134181	0.0746913	0.874937	0.0240319	0.0051378
GSM4643732_E11.5gonad_CATCGAAAGCCCGAAA	0.484248	0.0222225	0.00897104	0.0301514	0.0207022	0.00844761	0.030943	0.394314
GSM4643732_E11.5gonad_CATCGAAGTACTTGAC	0.145377	0.0819517	0.0477143	0.185319	0.197355	0.173707	0.153765	0.0148115
GSM4643732_E11.5gonad_CATCGAAGTCATGCCG	0.0231218	0.0373856	0.0316477	0.0153977	0.229422	0.0387897	0.135337	0.488899
GSM4643732_E11.5gonad_CATCGAAGTTGAGTTC	0.306163	0.2939	0.0126309	0.00165985	0.0300777	0.337956	0.00784082	0.00977064
GSM4643732_E11.5gonad_CATCGAATCTCTAAGG	0.000157365	0.000405002	0.000548403	0.000229049	0.855252	0.0628999	0.0801073	0.000401211
GSM4643732_E11.5gonad_CATCGGGAGGAACTGC	0.0606326	0.0144313	0.015327	0.00920676	0.0606414	0.0656473	0.296777	0.477337
GSM4643732_E11.5gonad_CATGACAAGAGCCCAA	0.956612	0.00325138	0.00109444	0.00198416	0.00398628	0.0244143	0.00282494	0.00583273
GSM4643732_E11.5gonad_CATGACACAATGCCAT	0.000680067	0.00345719	0.0101616	0.00079835	0.0616365	0.746301	0.176413	0.000552427
GSM4643732_E11.5gonad_CATGCCTAGAGACTAT	0.0944957	0.060301	0.0237317	0.0112474	0.191291	0.321908	0.288644	0.00838211
GSM4643732_E11.5gonad_CATGCCTGTACTCGCG	0.902735	0.0294762	0.0031351	0.00358862	0.0117153	0.0213347	0.00521544	0.0228
GSM4643732_E11.5gonad_CATGGCGCACATTAGC	0.0247603	0.0069267	0.00267785	0.00134337	0.0394583	0.672495	0.00504514	0.247293
GSM4643732_E11.5gonad_CATGGCGCAGGTTTCA	0.319347	0.268611	0.0476611	0.0123833	0.115806	0.148074	0.0776154	0.0105017
GSM4643732_E11.5gonad_CATGGCGTCATAAAGG	0.0634085	0.051222	0.0898264	0.00641737	0.16571	0.506524	0.102214	0.014678
GSM4643732_E11.5gonad_CATTCGCAGCTCCTTC	0.159872	0.188491	0.0687525	0.0204498	0.353928	0.0624952	0.125655	0.0203559
GSM4643732_E11.5gonad_CATTCGCCAGAGCCAA	0.531535	0.00746337	0.00389439	0.000968559	0.0075414	0.444101	0.0027953	0.00170069
GSM4643732_E11.5gonad_CCAATCCAGCTACCTA	0.0314915	0.263075	0.11892	0.00113504	0.0932896	0.487588	0.00371447	0.000786847
GSM4643732_E11.5gonad_CCAATCCCAGGACCCT	0.105353	0.100388	0.0477897	0.00205758	0.0940487	0.628589	0.0171994	0.0045749
GSM4643732_E11.5gonad_CCAATCCTCGAGAACG	0.0125778	0.169148	0.0158042	0.0025556	0.193171	0.401627	0.200085	0.00503089
GSM4643732_E11.5gonad_CCACCTAAGCTGAAAT	0.253383	0.0684858	0.0291089	0.0637831	0.0913822	0.0429658	0.0589604	0.39193
GSM4643732_E11.5gonad_CCACCTACACAGCGTC	0.950102	0.0076883	0.000527158	0.000662552	0.00415899	0.0255515	0.00848863	0.00282112
GSM4643732_E11.5gonad_CCACCTACACATGACT	0.0477916	0.053317	0.00208549	0.00173469	0.00958563	0.0803871	0.00746602	0.797632
GSM4643732_E11.5gonad_CCACGGAAGGGATCTG	0.0820773	0.0461462	0.0184174	0.0098334	0.310909	0.0742984	0.404503	0.0538148
GSM4643732_E11.5gonad_CCACTACCACCGTTGG	0.0202955	0.0574745	0.0279912	0.043166	0.113063	0.307433	0.0842565	0.346321
GSM4643732_E11.5gonad_CCACTACGTACGCTGC	0.179149	0.0225672	0.0073473	0.0153786	0.10119	0.27719	0.0853274	0.31185
GSM4643732_E11.5gonad_CCAGCGAAGGACTGGT	0.588382	0.0254991	0.00979276	0.092071	0.0348586	0.00810151	0.0235923	0.217702
GSM4643732_E11.5gonad_CCAGCGACAAACAACA	0.434158	0.179884	0.0298741	0.00822393	0.118701	0.137657	0.0614101	0.0300922
GSM4643732_E11.5gonad_CCAGCGATCAGCGACC	0.169599	0.688937	0.0434055	0.00531573	0.0490892	0.0278896	0.0104823	0.00528165
GSM4643732_E11.5gonad_CCATGTCTCGGTCTAA	0.0213793	0.0120773	0.0170004	0.0296383	0.483939	0.127409	0.263043	0.0455131
GSM4643732_E11.5gonad_CCATTCGAGGCTAGGT	0.870491	0.0284744	0.00187441	0.00425566	0.0127751	0.0754582	0.0028809	0.00379039
GSM4643732_E11.5gonad_CCATTCGCAAGCTGTT	0.0124396	0.00516479	0.00222203	0.00497655	0.0277118	0.00292669	0.0273046	0.917254
GSM4643732_E11.5gonad_CCATTCGGTCGGCATC	0.313824	0.124378	0.0378538	0.0198691	0.33219	0.0702426	0.0937282	0.00791369
GSM4643732_E11.5gonad_CCCAATCAGGATTCGG	0.0912723	0.0503276	0.0138252	0.0167918	0.248985	0.443529	0.123973	0.0112951
GSM4643732_E11.5gonad_CCCAATCCACCTATCC	0.187728	0.0517465	0.0188623	0.126887	0.079705	0.167757	0.0445274	0.322787
GSM4643732_E11.5gonad_CCCAATCGTCCTCCAT	0.508238	0.118609	0.0212478	0.0508563	0.0806633	0.0857348	0.0587424	0.0759084
GSM4643732_E11.5gonad_CCCAATCGTTGGTTTG	0.00818029	0.00251577	0.000298082	0.0058455	0.00237065	0.00479498	0.0032064	0.972788
GSM4643732_E11.5gonad_CCCAATCGTTGTCGCG	0.597654	0.0769447	0.0143124	0.0175883	0.0934016	0.0899247	0.0689608	0.0412139
GSM4643732_E11.5gonad_CCCAGTTGTCGAGATG	0.0281984	0.0128408	0.0164473	0.0027025	0.133824	0.703039	0.0824951	0.0204522
GSM4643732_E11.5gonad_CCCAGTTGTTAGAACA	0.0590661	0.0235525	0.0109579	0.0515895	0.312767	0.011114	0.217436	0.313517
GSM4643732_E11.5gonad_CCCATACCAAGAGGCT	0.0327934	0.0678068	0.226913	0.541876	0.0997259	0.0230275	0.00657138	0.00128624
GSM4643732_E11.5gonad_CCCATACCAGGTCGTC	0.349496	0.175273	0.0734718	0.0539485	0.145233	0.0549592	0.0988884	0.0487311
GSM4643732_E11.5gonad_CCCATACTCTTTAGTC	0.146192	0.146333	0.00415475	0.00230087	0.0198712	0.665281	0.00461541	0.0112522
GSM4643732_E11.5gonad_CCCTCCTAGAAGGCCT	0.0301941	0.0172019	0.00371319	0.00714822	0.0598738	0.45889	0.0162814	0.406698
GSM4643732_E11.5gonad_CCCTCCTAGCGCCTCA	0.497845	0.0998737	0.00431799	0.00694709	0.047358	0.318751	0.0152227	0.00968478
GSM4643732_E11.5gonad_CCCTCCTAGGGTCTCC	0.0193075	0.0427539	0.0055623	0.00332443	0.301059	0.575151	0.0272001	0.0256414
GSM4643732_E11.5gonad_CCCTCCTCAAAGGTGC	0.0175543	0.873134	0.00806084	0.000816031	0.00522535	0.0895203	0.00537399	0.000315006
GSM4643732_E11.5gonad_CCGGGATGTATATCCG	0.000302688	0.000477141	0.0004585	7.08116e-05	0.0125889	0.975565	0.0082154	0.00232142
GSM4643732_E11.5gonad_CCGGGATTCCACGACG	0.0224159	0.0118165	0.00180774	0.000913078	0.0395049	0.566665	0.0319821	0.324895
GSM4643732_E11.5gonad_CCGGTAGAGTTGCAGG	0.217022	0.0233527	0.00592135	0.00989137	0.0254524	0.0705947	0.0262923	0.621473
GSM4643732_E11.5gonad_CCGGTAGCAATCCAAC	0.279221	0.0125014	0.00439697	0.0127578	0.0229442	0.0158361	0.018275	0.634067
GSM4643732_E11.5gonad_CCGGTAGGTCTGCGGT	0.0019571	0.974151	0.0114461	0.00209563	0.00364937	0.00185832	0.00350169	0.00134086
GSM4643732_E11.5gonad_CCGGTAGTCCGGGTGT	0.0443395	0.0596295	0.0393306	0.00775209	0.264691	0.323092	0.113132	0.148034
GSM4643732_E11.5gonad_CCGTACTAGGCATGGT	0.573859	0.250422	0.0118047	0.00523213	0.0418631	0.0367842	0.0164873	0.0635472
GSM4643732_E11.5gonad_CCGTACTCACAGCGTC	0.101527	0.126276	0.131668	0.186353	0.298446	0.105855	0.0258957	0.0239786
GSM4643732_E11.5gonad_CCGTACTCACGGTGTC	0.854054	0.0575797	0.00410119	0.00141603	0.018722	0.039355	0.00913163	0.0156403
GSM4643732_E11.5gonad_CCGTTCAAGTGTACTC	0.221877	0.113973	0.0245526	0.0132971	0.0798359	0.0867554	0.171113	0.288596
GSM4643732_E11.5gonad_CCGTTCATCTGTCTAT	0.0903364	0.0196573	0.00595856	0.0956227	0.0731873	0.0777142	0.0571922	0.580331
GSM4643732_E11.5gonad_CCTAAAGGTCCCTACT	0.571493	0.021222	0.00609875	0.0359127	0.0195659	0.00904469	0.0216225	0.315041
GSM4643732_E11.5gonad_CCTAAAGTCACCAGGC	0.839207	0.0275381	0.00561924	0.0229754	0.0292429	0.0103525	0.0118191	0.0532462
GSM4643732_E11.5gonad_CCTACACAGACAATAC	0.109799	0.0251492	0.0151338	0.010279	0.249531	0.157959	0.0335858	0.398563
GSM4643732_E11.5gonad_CCTACACCATCAGTCA	0.00743365	0.000258995	0.000105259	0.000422367	0.00511067	0.00155446	0.000473474	0.984641
GSM4643732_E11.5gonad_CCTACACTCAGTGCAT	3.05503e-05	0.00232693	0.986834	4.15343e-05	0.000522478	0.0102088	3.31139e-05	2.44459e-06
GSM4643732_E11.5gonad_CCTACACTCGGCGGTT	0.00110314	0.000600319	0.000268184	0.000255776	0.00201011	0.00215659	0.002288	0.991318
GSM4643732_E11.5gonad_CCTACCAAGACCTTTG	0.347379	0.040451	0.0177813	0.0135478	0.0978251	0.353369	0.0221024	0.107544
GSM4643732_E11.5gonad_CCTAGCTGTAGCTAAA	0.0151236	0.0258714	0.104115	0.00481266	0.592713	0.229323	0.0208998	0.00714182
GSM4643732_E11.5gonad_CCTAGCTGTCAGTGGA	0.011965	0.0485012	0.0837309	0.00893734	0.469885	0.0755046	0.268423	0.0330526
GSM4643732_E11.5gonad_CCTAGCTTCAACCAAC	0.624772	0.00757574	0.00168341	0.00281154	0.0367661	0.0448409	0.0153198	0.26623
GSM4643732_E11.5gonad_CCTATTAGTGGCCCTA	0.000164264	0.00112486	0.0046048	1.7377e-05	0.0146182	0.977353	0.00210591	1.18955e-05
GSM4643732_E11.5gonad_CCTATTATCCGAGCCA	0.187505	0.0525406	0.0363106	0.417956	0.0747129	0.0499833	0.146808	0.0341837
GSM4643732_E11.5gonad_CCTCAGTAGAATGTTG	0.832757	0.018825	0.00365014	0.00229399	0.00805229	0.127714	0.00233636	0.0043717
GSM4643732_E11.5gonad_CCTCAGTGTCACCTAA	0.243457	0.0320152	0.0103575	0.0132409	0.156481	0.290394	0.238718	0.0153358
GSM4643732_E11.5gonad_CCTCAGTGTTGCGCAC	0.000180073	0.000346974	0.000824923	2.86174e-06	0.00136048	0.995324	0.00195455	5.92459e-06
GSM4643732_E11.5gonad_CCTCTGAAGAAACGCC	0.0604751	0.0597619	0.011679	0.0139457	0.0484006	0.0364552	0.0318584	0.737424
GSM4643732_E11.5gonad_CCTCTGATCTGTCAAG	0.0433859	0.0172815	0.0424563	0.00784536	0.388992	0.340545	0.0501027	0.109392
GSM4643732_E11.5gonad_CCTTACGTCGAATGCT	0.877527	0.00789192	0.00277562	0.00725657	0.00959499	0.0120633	0.00738783	0.0755028
GSM4643732_E11.5gonad_CCTTACGTCTGTCTAT	0.57946	0.0629095	0.0166033	0.0122129	0.0450668	0.10774	0.111762	0.064246
GSM4643732_E11.5gonad_CCTTCCCCACACAGAG	0.252612	0.0785169	0.0117821	0.00493045	0.0366513	0.573573	0.0246166	0.0173178
GSM4643732_E11.5gonad_CCTTCCCCATTGTGCA	0.0888917	0.041541	0.0178526	0.00895476	0.302025	0.365829	0.163364	0.0115411
GSM4643732_E11.5gonad_CCTTCCCTCATGTCTT	0.0149825	0.00319939	0.0014274	0.00374777	0.0147265	0.0204625	0.0123474	0.929107
GSM4643732_E11.5gonad_CCTTCCCTCGTTACGA	0.469699	0.520888	0.0019523	0.000985207	0.00270115	0.0024567	0.000527083	0.000790379
GSM4643732_E11.5gonad_CCTTCGAAGGTAGCCA	0.840693	0.0515294	0.00239808	0.00818603	0.0121347	0.0728329	0.00361893	0.0086073
GSM4643732_E11.5gonad_CCTTCGATCTGCCCTA	0.000153053	0.00734648	0.0121521	6.24951e-06	0.00203587	0.977204	0.00107619	2.56416e-05
GSM4643732_E11.5gonad_CCTTTCTCACCTTGTC	4.32335e-05	0.000786675	0.000864213	4.67974e-06	0.00140045	0.945087	0.0518128	9.23219e-07
GSM4643732_E11.5gonad_CCTTTCTGTTATGCGT	0.0206586	0.00540426	0.0056875	0.00758185	0.0396479	0.716895	0.00692121	0.197204
GSM4643732_E11.5gonad_CGAACATAGAGTGAGA	0.000635473	0.0452364	0.409552	0.00088602	0.216944	0.305295	0.0210745	0.000377129
GSM4643732_E11.5gonad_CGAACATAGCCAGGAT	0.0899893	0.0279857	0.0175813	0.0647845	0.100618	0.0387276	0.102732	0.557582
GSM4643732_E11.5gonad_CGAACATAGGTACTCT	0.345883	0.0334228	0.0132513	0.0124522	0.127809	0.246195	0.0877364	0.13325
GSM4643732_E11.5gonad_CGAACATTCCCAACGG	0.153435	0.0241045	0.0175177	0.0168677	0.227045	0.0375253	0.388131	0.135374
GSM4643732_E11.5gonad_CGAATGTGTAAGTAGT	0.0016011	0.0565708	0.0232382	0.000323984	0.142614	0.762776	0.0127323	0.000143489
GSM4643732_E11.5gonad_CGAATGTGTTCGCTAA	0.528255	0.0304765	0.00675231	0.0172236	0.0182515	0.0342071	0.01509	0.349744
GSM4643732_E11.5gonad_CGACCTTAGCTATGCT	0.447915	0.0184433	0.00674269	0.029534	0.0146821	0.00552637	0.0208247	0.456332
GSM4643732_E11.5gonad_CGACCTTCACGCATCG	0.0146461	0.0462405	0.0624768	0.00140366	0.0264277	0.829756	0.00683324	0.0122158
GSM4643732_E11.5gonad_CGACCTTGTAGGGACT	0.152127	0.158982	0.130331	0.133266	0.139994	0.137977	0.105482	0.0418404
GSM4643732_E11.5gonad_CGACCTTGTTCTGTTT	0.627251	0.0269239	0.00764277	0.0578309	0.0259868	0.0147038	0.0288989	0.210762
GSM4643732_E11.5gonad_CGACCTTTCTGCCAGG	0.9884	0.00337493	0.00013305	0.000282636	0.00289616	0.00339257	0.000190027	0.00133038
GSM4643732_E11.5gonad_CGACTTCAGAAAGTGG	0.135709	0.0230889	0.0107277	0.0206853	0.0733598	0.00608086	0.0521333	0.678215
GSM4643732_E11.5gonad_CGACTTCGTCTTCTCG	0.0427928	0.0140576	0.0127965	0.015747	0.13773	0.00896023	0.0742518	0.693663
GSM4643732_E11.5gonad_CGACTTCTCACCGGGT	0.249679	0.0262778	0.0125307	0.0418054	0.342437	0.158261	0.023717	0.145292
GSM4643732_E11.5gonad_CGACTTCTCATAAAGG	0.000727496	0.00589016	0.23232	0.00164483	0.529548	0.223077	0.00599285	0.00080011
GSM4643732_E11.5gonad_CGACTTCTCGGTCTAA	0.423862	0.0907516	0.0223356	0.011576	0.154723	0.0767542	0.213833	0.0061648
GSM4643732_E11.5gonad_CGAGAAGAGTCATCCA	0.0676926	0.176364	0.275497	0.0152576	0.103225	0.323075	0.0359587	0.00292939
GSM4643732_E11.5gonad_CGAGAAGAGTGTGAAT	0.0913205	0.00340225	0.000330824	0.000143349	0.00459652	0.89989	0.000203635	0.000113405
GSM4643732_E11.5gonad_CGAGAAGGTTTGGGCC	0.630995	0.0174261	0.00233683	0.000342998	0.0153992	0.303451	0.0250033	0.00504524
GSM4643732_E11.5gonad_CGAGCACTCGAGAGCA	0.936647	0.0140628	0.00218973	0.00761861	0.00763031	0.0174377	0.00634509	0.00806844
GSM4643732_E11.5gonad_CGATCGGAGGCTCATT	0.0104446	0.0298689	0.0210371	0.00234896	0.727818	0.190528	0.0176012	0.000353129
GSM4643732_E11.5gonad_CGATCGGGTAATAGCA	0.0621509	0.0742968	0.036206	0.0383285	0.122997	0.0635141	0.129253	0.473253
GSM4643732_E11.5gonad_CGATCGGGTCGAATCT	0.0181533	0.263697	0.28992	0.00458622	0.114987	0.27396	0.0339283	0.000768063
GSM4643732_E11.5gonad_CGATGGCCATCCGTGG	0.0203178	0.0259013	0.0164438	0.000274199	0.0141616	0.890903	0.0234384	0.00856015
GSM4643732_E11.5gonad_CGATGGCCATCTCCCA	0.077538	0.200915	0.0428887	0.00941063	0.264094	0.340677	0.0507121	0.0137645
GSM4643732_E11.5gonad_CGATGGCGTAGTAGTA	0.814253	0.0180552	0.00538485	0.0195534	0.0176888	0.0128215	0.0142186	0.0980244
GSM4643732_E11.5gonad_CGATGGCTCCTCGCAT	0.0203811	0.193196	0.14656	0.00233257	0.162229	0.3965	0.0666073	0.0121936
GSM4643732_E11.5gonad_CGATTGAAGTGCCATT	0.503544	0.162193	0.0120933	0.0692922	0.0468389	0.0143509	0.0555876	0.1361
GSM4643732_E11.5gonad_CGATTGACAGAAGCAC	0.82981	0.0231787	0.00851007	0.00406793	0.0621548	0.052959	0.0135828	0.00573672
GSM4643732_E11.5gonad_CGCCAAGAGAGTACCG	7.01574e-06	0.000420193	0.000110039	7.11061e-05	0.000135765	0.000701936	0.000557973	0.997996
GSM4643732_E11.5gonad_CGCCAAGAGATGCCAG	0.878991	0.00390213	0.000807245	0.000329315	0.0017228	0.100569	0.000934326	0.0127445
GSM4643732_E11.5gonad_CGCCAAGCAAAGTGCG	0.612702	0.0178738	0.00611658	0.0260328	0.0137278	0.00613208	0.0170218	0.300393
GSM4643732_E11.5gonad_CGCCAAGGTAAGCACG	0.0326414	0.0259749	0.0547606	0.0163882	0.411027	0.364701	0.0712929	0.0232144
GSM4643732_E11.5gonad_CGCCAAGTCTACCAGA	0.191365	0.0246528	0.00521186	0.00396495	0.0282025	0.642536	0.0125288	0.0915382
GSM4643732_E11.5gonad_CGCGGTAAGGTTACCT	0.00780239	0.0828627	0.020623	0.0311751	0.477722	0.306923	0.0242355	0.0486563
GSM4643732_E11.5gonad_CGCGGTAAGTGTACGG	0.00160957	0.010892	0.0312902	0.00180371	0.0606424	0.877246	0.0096456	0.00687099
GSM4643732_E11.5gonad_CGCGGTAGTGCTAGCC	0.0217032	0.226613	0.0131158	0.00358829	0.421378	0.178601	0.0179909	0.11701
GSM4643732_E11.5gonad_CGCGTTTAGGTTCCTA	0.0926666	0.0360776	0.0459908	0.00853507	0.104355	0.322712	0.382611	0.00705237
GSM4643732_E11.5gonad_CGCGTTTGTAGCGTGA	0.609777	0.0281048	0.00888002	0.0325577	0.0310401	0.00875797	0.0209632	0.25992
GSM4643732_E11.5gonad_CGCGTTTTCACTATTC	0.00560489	0.00323027	0.00781809	0.000849953	0.236991	0.703285	0.0414369	0.000784229
GSM4643732_E11.5gonad_CGCTATCAGGCAGGTT	0.0196548	0.0616004	0.205959	0.00425906	0.439448	0.25912	0.00790588	0.00205363
GSM4643732_E11.5gonad_CGCTATCCATGCCTAA	0.292888	0.122429	0.0197126	0.0249737	0.105513	0.227626	0.0745789	0.132279
GSM4643732_E11.5gonad_CGCTATCGTTTGGCGC	0.00260359	0.234333	0.102041	0.000901372	0.0577409	0.59933	0.00278811	0.000262879
GSM4643732_E11.5gonad_CGCTATCTCGCCCTTA	0.84219	0.109157	0.00227511	0.00515618	0.0178067	0.0143062	0.00274016	0.00636916
GSM4643732_E11.5gonad_CGCTTCAAGCTGGAAC	0.0656795	0.0260824	0.0201078	0.0128485	0.180121	0.613536	0.073309	0.00831545
GSM4643732_E11.5gonad_CGCTTCAAGGGTTTCT	0.0609769	0.0690819	0.0328633	0.00855253	0.134708	0.153343	0.350619	0.189854
GSM4643732_E11.5gonad_CGCTTCAGTGTGGCTC	0.159068	0.0486683	0.020772	0.0069571	0.510022	0.0698851	0.125479	0.0591481
GSM4643732_E11.5gonad_CGCTTCAGTTGGACCC	0.352894	0.125077	0.0264872	0.00880625	0.134139	0.15092	0.194712	0.00696458
GSM4643732_E11.5gonad_CGCTTCATCAAACAAG	0.93581	0.00991888	0.000547878	0.000639527	0.00396755	0.0479964	0.000251646	0.000868634
GSM4643732_E11.5gonad_CGGACACGTCTGGTCG	0.116896	0.0491232	0.0314234	0.0114207	0.141753	0.330846	0.262353	0.0561842
GSM4643732_E11.5gonad_CGGACACTCCGTAGGC	0.0877422	0.134578	0.102349	0.00338033	0.0394276	0.573846	0.0165472	0.0421307
GSM4643732_E11.5gonad_CGGACGTAGAGCCTAG	0.369662	0.122715	0.0239851	0.213488	0.0237033	0.135993	0.0211245	0.0893296
GSM4643732_E11.5gonad_CGGACGTAGGCTAGCA	0.00378685	0.138721	0.0968591	0.00102981	0.0379469	0.717062	0.00349019	0.00110381
GSM4643732_E11.5gonad_CGGACGTGTAGCGTCC	0.502892	0.045554	0.0113696	0.0112046	0.119685	0.150042	0.0569895	0.102263
GSM4643732_E11.5gonad_CGGACGTGTAGCTTGT	0.382754	0.037164	0.0117559	0.0332433	0.12215	0.211798	0.0743967	0.126737
GSM4643732_E11.5gonad_CGGACTGCACACTGCG	0.000154045	0.0149457	0.207	0.00144602	0.020678	0.750098	0.00537352	0.000304243
GSM4643732_E11.5gonad_CGGACTGCACAGACAG	0.160864	0.155983	0.0315395	0.0441808	0.0631134	0.499748	0.0359655	0.00860608
GSM4643732_E11.5gonad_CGGACTGCAGTAAGCG	0.559465	0.0404513	0.00641099	0.00434743	0.0353315	0.0748023	0.233344	0.0458473
GSM4643732_E11.5gonad_CGGACTGGTGCTCTTC	0.641957	0.104162	0.0249432	0.0115601	0.0355148	0.142395	0.0217993	0.0176678
GSM4643732_E11.5gonad_CGGACTGGTTACCGAT	0.752774	0.0292849	0.0202778	0.0124293	0.0418559	0.036656	0.0536104	0.0531113
GSM4643732_E11.5gonad_CGGACTGTCATCATTC	0.685567	0.181954	0.00940927	0.021359	0.0108721	0.0290962	0.0095611	0.0521809
GSM4643732_E11.5gonad_CGGACTGTCATCGCTC	0.0497017	0.159773	0.0707879	0.0325845	0.325839	0.0414793	0.307002	0.0128324
GSM4643732_E11.5gonad_CGGAGTCCACCCAGTG	0.000997125	0.224508	0.179751	0.000994148	0.0703447	0.505805	0.0170856	0.000514057
GSM4643732_E11.5gonad_CGGAGTCGTAAAGGAG	0.210719	0.0377982	0.012648	0.0437534	0.240874	0.0397621	0.0982267	0.316219
GSM4643732_E11.5gonad_CGGAGTCGTGTAATGA	0.0467893	0.342187	0.0655345	0.00446998	0.163613	0.0597324	0.280712	0.0369616
GSM4643732_E11.5gonad_CGGAGTCGTTGTCTTT	0.0137112	0.0094529	0.0093624	0.00218679	0.190805	0.0149414	0.436402	0.323138
GSM4643732_E11.5gonad_CGGAGTCTCGTTTGCC	0.0804673	0.075445	0.00629018	0.00178703	0.100456	0.675462	0.0123325	0.0477597
GSM4643732_E11.5gonad_CGGCTAGCAACACGCC	0.485926	0.0240984	0.00717959	0.0316217	0.0465137	0.0177776	0.0469623	0.339921
GSM4643732_E11.5gonad_CGGCTAGGTCTAGGTT	0.000772995	0.00252474	0.0162071	2.56076e-05	0.0278979	0.949053	0.00208588	0.00143242
GSM4643732_E11.5gonad_CGGGTCACATGCCACG	0.104977	0.0169236	0.0288941	0.00800953	0.0559514	0.732445	0.0488731	0.00392571
GSM4643732_E11.5gonad_CGGGTCAGTCATACTG	0.861451	0.0192872	0.0062436	0.00995304	0.0396213	0.0137718	0.0195579	0.0301137
GSM4643732_E11.5gonad_CGGGTCATCCCTTGCA	0.467697	0.0619987	0.0165076	0.0451063	0.0705436	0.0755532	0.0992274	0.163367
GSM4643732_E11.5gonad_CGGTTAAAGCCACGCT	0.000758579	0.00151858	0.00156219	0.00075008	0.769635	0.00529995	0.06786	0.152615
GSM4643732_E11.5gonad_CGGTTAAAGCGTTGCC	0.841642	0.148678	0.00159283	0.000213103	0.00207337	0.00457618	0.00071926	0.00050579
GSM4643732_E11.5gonad_CGGTTAATCCCGACTT	0.000431795	0.00410854	0.580091	0.0012921	0.110439	0.301938	0.00127841	0.000420719
GSM4643732_E11.5gonad_CGTAGCGAGAGCCCAA	0.0438433	0.279002	0.0523133	0.0157212	0.09365	0.148013	0.318978	0.0484789
GSM4643732_E11.5gonad_CGTAGCGCACGGATAG	0.453293	0.0166469	0.00612432	0.0235701	0.0268039	0.0118454	0.0243342	0.437382
GSM4643732_E11.5gonad_CGTAGCGGTGCCTGGT	0.869342	0.0118604	0.00269944	0.00657899	0.013367	0.0511469	0.00837749	0.0366277
GSM4643732_E11.5gonad_CGTAGCGTCAGTTTGG	0.0618935	0.0520642	0.472451	0.00448731	0.102866	0.27323	0.0294705	0.00353714
GSM4643732_E11.5gonad_CGTAGGCGTTCACCTC	0.205773	0.0416361	0.0256725	0.02095	0.0869699	0.0586034	0.30355	0.256846
GSM4643732_E11.5gonad_CGTAGGCTCGCCATAA	0.00596124	0.422141	0.0667945	0.000272362	0.0730938	0.430511	0.00113619	8.93827e-05
GSM4643732_E11.5gonad_CGTCACTAGCGATATA	0.509641	0.0511343	0.0112437	0.00787274	0.104576	0.256559	0.0166783	0.042296
GSM4643732_E11.5gonad_CGTCACTGTCAGTGGA	0.0182217	0.0137274	0.00707875	0.00306043	0.0107574	0.064149	0.0041294	0.878876
GSM4643732_E11.5gonad_CGTCACTTCTGACCTC	0.513669	0.035843	0.0129414	0.0104565	0.0925734	0.0673179	0.0560051	0.211194
GSM4643732_E11.5gonad_CGTCAGGCACTGTGTA	0.273286	0.0580502	0.0107179	0.00362227	0.118074	0.0746404	0.45194	0.00966875
GSM4643732_E11.5gonad_CGTCAGGGTTTGTGTG	0.348779	0.0169229	0.00747199	0.0193923	0.0251361	0.010511	0.0274463	0.54434
GSM4643732_E11.5gonad_CGTCAGGTCATAGCAC	0.694129	0.0938199	0.011635	0.0199159	0.0461932	0.0717278	0.0205608	0.0420189
GSM4643732_E11.5gonad_CGTCCATGTGGTCTCG	0.52007	0.0382859	0.0154728	0.0503862	0.0619638	0.0367359	0.0220396	0.255046
GSM4643732_E11.5gonad_CGTCCATTCTGCGACG	0.000837207	0.0130027	0.243583	0.00210494	0.545083	0.19081	0.00377229	0.000807167
GSM4643732_E11.5gonad_CGTCTACAGTTATCGC	0.394934	0.0898431	0.031853	0.0710027	0.158745	0.0859164	0.063742	0.103964
GSM4643732_E11.5gonad_CGTCTACTCGCTTGTC	0.170791	0.0526159	0.03173	0.0232168	0.394879	0.026162	0.21057	0.0900355
GSM4643732_E11.5gonad_CGTGTAATCCAAAGTC	0.798268	0.0160508	0.00532701	0.0227528	0.0117656	0.00585989	0.014752	0.125224
GSM4643732_E11.5gonad_CGTGTCTGTGTAAGTA	0.0751926	0.0464023	0.0143548	0.00346403	0.178515	0.53223	0.14218	0.00766145
GSM4643732_E11.5gonad_CGTGTCTGTTGAACTC	0.00921454	0.0110654	0.0198682	0.00335118	0.158804	0.591797	0.184445	0.021454
GSM4643732_E11.5gonad_CGTTAGATCAAGAAGT	0.0302523	0.0395555	0.0327248	0.00228895	0.275012	0.309674	0.300564	0.00992885
GSM4643732_E11.5gonad_CGTTCTGAGGTAGCTG	0.0152582	0.00167318	0.000700328	0.00102777	0.0311132	0.278757	0.0175954	0.653875
GSM4643732_E11.5gonad_CGTTCTGGTGTTCTTT	0.359111	0.0338407	0.0231417	0.0126723	0.0736596	0.117592	0.326177	0.0538061
GSM4643732_E11.5gonad_CGTTCTGTCCACGTTC	0.187574	0.0132937	0.00892729	0.0200032	0.018263	0.00842485	0.0203343	0.72318
GSM4643732_E11.5gonad_CGTTGGGAGACTGTAA	0.00015889	0.00590571	0.151083	6.4767e-05	0.0343486	0.805135	0.00328298	2.06895e-05
GSM4643732_E11.5gonad_CGTTGGGAGCTAACAA	0.0403233	0.150133	0.0189462	0.0100194	0.122746	0.496968	0.152947	0.00791709
GSM4643732_E11.5gonad_CGTTGGGCAAGGACAC	0.0709892	0.0250579	0.0425434	0.0165475	0.0722249	0.114167	0.133237	0.525233
GSM4643732_E11.5gonad_CGTTGGGCATATACGC	0.868327	0.0140775	0.0051565	0.0185529	0.0110036	0.00734587	0.0122262	0.0633105
GSM4643732_E11.5gonad_CGTTGGGGTGCGGTAA	0.0903484	0.0500317	0.0888325	0.0170091	0.279514	0.295094	0.149975	0.0291954
GSM4643732_E11.5gonad_CTAACTTAGCTGAACG	0.150826	0.0221958	0.00434658	0.00352377	0.00982154	0.101692	0.00944644	0.698149
GSM4643732_E11.5gonad_CTAACTTAGGATATAC	0.00758968	0.0133924	0.0136046	0.00253581	0.138781	0.282002	0.538583	0.00351169
GSM4643732_E11.5gonad_CTAACTTCAATAAGCA	0.826689	0.0518025	0.0142422	0.0203744	0.0364751	0.041758	0.00315609	0.00550282
GSM4643732_E11.5gonad_CTAACTTGTAGAGTGC	0.00442775	0.00432286	0.00336567	0.00179843	0.0103981	0.0130567	0.0351292	0.927501
GSM4643732_E11.5gonad_CTAACTTTCCCGGATG	0.21379	0.101918	0.0516847	0.0172335	0.131294	0.22397	0.199984	0.0601271
GSM4643732_E11.5gonad_CTAACTTTCGCATGGC	0.654761	0.0270915	0.0136476	0.0374747	0.0810609	0.120429	0.0493406	0.0161954
GSM4643732_E11.5gonad_CTAAGACAGTCATGCT	0.00277466	0.0378694	0.0469242	0.00368723	0.435968	0.0540759	0.0136158	0.405085
GSM4643732_E11.5gonad_CTAATGGAGGCTACGA	0.00738274	0.0101484	0.0181747	0.0102523	0.433526	0.378899	0.117009	0.0246077
GSM4643732_E11.5gonad_CTAATGGTCCACGAAT	0.635522	0.0155984	0.00537801	0.0276818	0.0131944	0.00636775	0.0152048	0.281053
GSM4643732_E11.5gonad_CTACACCCACGACTCG	0.489618	0.0186686	0.00658155	0.0283977	0.0144393	0.00567236	0.0200734	0.416549
GSM4643732_E11.5gonad_CTACACCCAGGACCCT	0.0182326	0.0117368	0.0123596	0.000478917	0.0526781	0.893701	0.0099822	0.00083039
GSM4643732_E11.5gonad_CTACACCGTGCACTTA	0.0644939	0.119465	0.048272	0.0160804	0.106675	0.119975	0.102223	0.422816
GSM4643732_E11.5gonad_CTACATTCAACGCACC	0.0154427	0.00260243	0.000967892	0.0004613	0.0201663	0.0996676	0.0104734	0.850218
GSM4643732_E11.5gonad_CTACCCAAGATCTGAA	0.0901011	0.0534841	0.0644939	0.0171154	0.503389	0.206631	0.0567006	0.00808482
GSM4643732_E11.5gonad_CTACCCATCACGATGT	0.00399387	0.00386039	0.023561	0.00106861	0.463285	0.479014	0.0215038	0.00371316
GSM4643732_E11.5gonad_CTACCCATCATTATCC	0.000325284	0.00400643	0.0124512	0.000559501	0.0877742	0.880308	0.0145283	4.69459e-05
GSM4643732_E11.5gonad_CTACGTCCAGTCGTGC	0.0159669	0.0667522	0.104853	0.0346343	0.403062	0.131517	0.220688	0.0225271
GSM4643732_E11.5gonad_CTACGTCGTCAAAGAT	0.512216	0.0852171	0.0307897	0.0230446	0.0432916	0.0368587	0.0793855	0.189196
GSM4643732_E11.5gonad_CTACGTCGTGCAACTT	0.616256	0.170674	0.0100971	0.000725713	0.0104985	0.18498	0.00556381	0.00120487
GSM4643732_E11.5gonad_CTACGTCGTTAGGGTG	0.110728	0.307138	0.0819955	0.00510492	0.204433	0.254217	0.031711	0.00467304
GSM4643732_E11.5gonad_CTACGTCGTTGGGACA	0.918055	0.0147011	0.0022158	0.00594798	0.0076447	0.0192253	0.0103178	0.021892
GSM4643732_E11.5gonad_CTAGAGTAGGCAGTCA	0.308957	0.00689248	0.00265292	0.0039963	0.0442189	0.29678	0.300511	0.0359915
GSM4643732_E11.5gonad_CTAGAGTCACGAGAGT	0.759811	0.0916162	0.00699363	0.00442871	0.0593447	0.0232974	0.0430471	0.011461
GSM4643732_E11.5gonad_CTAGCCTGTCATATGC	0.11316	0.0203659	0.00513225	0.00281133	0.057693	0.766802	0.020516	0.0135194
GSM4643732_E11.5gonad_CTAGTGAGTTATTCTC	0.0293507	0.0290597	0.0109534	0.0153458	0.237033	0.579028	0.0423345	0.0568947
GSM4643732_E11.5gonad_CTAGTGATCTCCTATA	0.736472	0.0157275	0.00508362	0.0214993	0.0116863	0.00634899	0.013898	0.189285
GSM4643732_E11.5gonad_CTCACACCAAGGACAC	0.847768	0.0451966	0.00193624	0.00121247	0.00740491	0.0872662	0.00265041	0.00656485
GSM4643732_E11.5gonad_CTCACACCACCGAAAG	0.00090571	0.000503022	9.0973e-05	0.0002501	0.0940067	0.00290244	0.000849489	0.900492
GSM4643732_E11.5gonad_CTCACACCACGAAGCA	0.030802	0.00408413	0.000775811	0.0014327	0.0182736	0.102057	0.00717057	0.835404
GSM4643732_E11.5gonad_CTCACACGTCGCATCG	0.196757	0.125935	0.036173	0.00163209	0.0245244	0.60761	0.00392978	0.00343851
GSM4643732_E11.5gonad_CTCACACTCACAATGC	0.0289006	0.0249057	0.0457055	0.0084919	0.161875	0.581516	0.122636	0.0259689
GSM4643732_E11.5gonad_CTCATTAAGTTGTCGT	0.0869996	0.0266125	0.0145731	0.0192169	0.113391	0.0109189	0.0867475	0.64154
GSM4643732_E11.5gonad_CTCATTATCCTTTACA	0.128232	0.447814	0.0802703	0.00447551	0.126808	0.207722	0.00346669	0.00121211
GSM4643732_E11.5gonad_CTCCTAGAGCGTTTAC	0.00695254	0.00292691	0.000871221	0.00100971	0.570564	0.0146417	0.0131499	0.389884
GSM4643732_E11.5gonad_CTCCTAGAGGCAATTA	0.543692	0.0230674	0.00625902	0.0542574	0.0893655	0.0261414	0.038172	0.219045
GSM4643732_E11.5gonad_CTCCTAGCATGGGACA	0.0613162	0.0358177	0.00947026	0.00340552	0.509819	0.200426	0.174677	0.00506843
GSM4643732_E11.5gonad_CTCCTAGGTCAAGCGA	0.420829	0.0516674	0.0281644	0.0175347	0.0919506	0.165405	0.0344258	0.190023
GSM4643732_E11.5gonad_CTCCTAGGTCCGTCAG	0.0948389	0.0154955	0.00449043	0.00318733	0.038749	0.390204	0.0128167	0.440218
GSM4643732_E11.5gonad_CTCGAAAAGCCAGAAC	0.33066	0.0171551	0.00403134	0.00330608	0.3477	0.0757369	0.177975	0.0434356
GSM4643732_E11.5gonad_CTCGAAAAGGTAGCCA	0.0738962	0.213491	0.0215887	0.0135165	0.27478	0.23048	0.119952	0.0522965
GSM4643732_E11.5gonad_CTCGAAACATGACATC	0.0406895	0.00598043	0.00243732	0.000739102	0.0175165	0.864259	0.00952178	0.0588562
GSM4643732_E11.5gonad_CTCGAAAGTTGTTTGG	0.0875591	0.00478168	0.00221582	0.00991619	0.0103593	0.0144205	0.0137166	0.857031
GSM4643732_E11.5gonad_CTCGAAATCATGCTCC	0.0013754	0.00372587	0.00520388	0.000332511	0.222661	0.716705	0.0490333	0.000963074
GSM4643732_E11.5gonad_CTCGAGGAGACTTGAA	0.251485	0.165428	0.0319257	0.0165556	0.092185	0.10364	0.0390529	0.299728
GSM4643732_E11.5gonad_CTCGAGGAGATAGTCA	0.867284	0.057304	0.00108714	0.000502181	0.00217442	0.0692741	0.00150799	0.000866113
GSM4643732_E11.5gonad_CTCGGAGAGCCACCTG	0.174472	0.0230923	0.0146318	0.0325821	0.153464	0.0142157	0.251402	0.33614
GSM4643732_E11.5gonad_CTCGGAGCAAACCTAC	0.0251532	0.151668	0.29468	0.0923908	0.123377	0.262773	0.0399527	0.0100055
GSM4643732_E11.5gonad_CTCGGAGCATGAAGTA	0.196011	0.384444	0.0624223	0.017424	0.126213	0.140872	0.0577423	0.0148726
GSM4643732_E11.5gonad_CTCGGAGGTATAATGG	0.591718	0.0792375	0.00839839	0.00233032	0.0522419	0.24659	0.0122338	0.00725005
GSM4643732_E11.5gonad_CTCGGAGGTATTCGTG	0.00090434	0.0401442	0.0153409	0.000367353	0.177697	0.751715	0.0138043	2.70414e-05
GSM4643732_E11.5gonad_CTCGGAGGTTACTGAC	0.473875	0.0324529	0.00912825	0.00647104	0.0413625	0.42827	0.00445965	0.00398076
GSM4643732_E11.5gonad_CTCGGGAAGGCTAGGT	0.790155	0.0278282	0.00327488	0.00230058	0.00874916	0.0810437	0.0112831	0.0753658
GSM4643732_E11.5gonad_CTCGGGAAGTTTAGGA	0.156029	0.0249322	0.0103892	0.0250383	0.0387633	0.00957965	0.0526474	0.682621
GSM4643732_E11.5gonad_CTCGGGAGTCGCATCG	0.737307	0.0393617	0.00329606	0.00243162	0.011642	0.160026	0.00701859	0.0389173
GSM4643732_E11.5gonad_CTCGGGATCCGTCAAA	0.033926	0.177735	0.126197	0.0233147	0.401492	0.11512	0.0376878	0.0845267
GSM4643732_E11.5gonad_CTCGGGATCGTTACAG	0.00311937	0.0921582	0.278067	0.0036409	0.202215	0.348105	0.0701039	0.00259072
GSM4643732_E11.5gonad_CTCGTACAGACAAAGG	8.3034e-05	0.00025994	0.000459949	4.05871e-05	0.0071019	0.0236484	0.968372	3.44526e-05
GSM4643732_E11.5gonad_CTCGTACGTTCCTCCA	0.00109559	0.373541	0.00848028	0.000110491	0.0640157	0.542878	0.00984726	3.11275e-05
GSM4643732_E11.5gonad_CTCGTCACAAACAACA	0.436813	0.0330989	0.00613774	0.00232278	0.0488942	0.384548	0.0191498	0.0690358
GSM4643732_E11.5gonad_CTCGTCACATATGGTC	0.0012652	0.049666	0.303217	0.0020341	0.242742	0.386537	0.0132458	0.00129364
GSM4643732_E11.5gonad_CTCTAATAGTTAGCGG	0.848286	0.0853006	0.00566726	0.00702079	0.00867805	0.0329224	0.00333168	0.0087933
GSM4643732_E11.5gonad_CTCTAATTCTGCGACG	0.00450679	0.0157821	0.0531735	0.00237358	0.0650345	0.521293	0.119275	0.218561
GSM4643732_E11.5gonad_CTCTACGAGTACATGA	0.495819	0.0247552	0.0084848	0.0347448	0.0240434	0.0194278	0.0280951	0.36463
GSM4643732_E11.5gonad_CTCTACGGTTCCGGCA	0.00266207	0.104877	0.244903	0.00605512	0.477734	0.132653	0.0302523	0.00086348
GSM4643732_E11.5gonad_CTCTGGTCAGAGCCAA	0.60134	0.0210474	0.0109032	0.014364	0.0245912	0.0375117	0.0153769	0.274866
GSM4643732_E11.5gonad_CTCTGGTCAGTTCCCT	0.0354203	0.944118	0.00629637	0.000375391	0.0027717	0.00942494	0.000746187	0.000847168
GSM4643732_E11.5gonad_CTCTGGTGTTAAAGAC	0.802084	0.0726859	0.00568151	0.0329238	0.0478522	0.0157098	0.0108025	0.0122606
GSM4643732_E11.5gonad_CTCTGGTTCCCTAACC	4.11328e-05	0.0101665	0.0861204	6.49972e-05	0.0352627	0.866489	0.00184473	1.02388e-05
GSM4643732_E11.5gonad_CTCTGGTTCTGGGCCA	0.503328	0.167614	0.0118548	0.00740361	0.0384919	0.22549	0.0227405	0.0230769
GSM4643732_E11.5gonad_CTCTGGTTCTTTACGT	0.0672758	0.0326338	0.0227016	0.00890073	0.217498	0.440516	0.20362	0.00685406
GSM4643732_E11.5gonad_CTGAAACAGTCGTACT	0.0270598	0.528877	0.0431215	0.0439912	0.18369	0.0572863	0.0722681	0.0437055
GSM4643732_E11.5gonad_CTGAAACGTTGGGACA	0.0433567	0.0341194	0.0668012	0.00258835	0.0577922	0.793565	0.00162689	0.000150342
GSM4643732_E11.5gonad_CTGAAACTCGTTGACA	0.427157	0.036325	0.00433818	0.0142308	0.176492	0.00674179	0.0175005	0.317214
GSM4643732_E11.5gonad_CTGAAGTCACAGCGTC	0.389556	0.0901295	0.0289352	0.0592885	0.0756031	0.0406782	0.0958373	0.219972
GSM4643732_E11.5gonad_CTGAAGTCATCGGACC	0.460572	0.0308384	0.0189652	0.0299991	0.0488068	0.0139689	0.0883773	0.308472
GSM4643732_E11.5gonad_CTGAAGTTCGGCGGTT	0.0518272	0.252616	0.0187047	0.0340621	0.259901	0.359271	0.018815	0.0048023
GSM4643732_E11.5gonad_CTGATAGGTCATGCCG	0.00106871	0.000189631	0.000131035	0.000339042	0.00456975	0.00132483	0.00393938	0.988438
GSM4643732_E11.5gonad_CTGATCCAGGACGAAA	0.539499	0.0219954	0.00867017	0.00942805	0.0343097	0.0625725	0.0221385	0.301386
GSM4643732_E11.5gonad_CTGATCCCACCGATAT	0.0451199	0.00646014	0.00313839	0.0138006	0.0430835	0.00661587	0.0299788	0.851803
GSM4643732_E11.5gonad_CTGATCCGTCGGGTCT	0.0822655	0.178248	0.0483282	0.0151816	0.173424	0.379225	0.0158304	0.107497
GSM4643732_E11.5gonad_CTGATCCGTGAGCGAT	0.869563	0.02163	0.005266	0.0121359	0.0141122	0.0121495	0.0359118	0.0292311
GSM4643732_E11.5gonad_CTGATCCTCAACGCTA	0.179777	0.0123544	0.00727887	0.0222452	0.0594096	0.0103738	0.139454	0.569106
GSM4643732_E11.5gonad_CTGCCTAGTCCCGACA	0.000110103	0.0143673	0.469719	0.000142539	0.108154	0.40574	0.00168493	8.23288e-05
GSM4643732_E11.5gonad_CTGCTGTTCACATAGC	0.000418155	0.0326806	0.481051	0.00279039	0.16537	0.299404	0.0180515	0.000234808
GSM4643732_E11.5gonad_CTGGTCTCAAACCTAC	0.891313	0.00917186	0.00251466	0.0115029	0.00847821	0.00908524	0.00598459	0.0619494
GSM4643732_E11.5gonad_CTGGTCTGTCTTGTCC	0.226294	0.0699519	0.0535026	0.0431537	0.19453	0.346379	0.0596746	0.00651468
GSM4643732_E11.5gonad_CTGGTCTTCCACGACG	0.0355515	0.0893151	0.079782	0.0307035	0.282776	0.0642484	0.356146	0.0614778
GSM4643732_E11.5gonad_CTGTGCTTCACAGGCC	0.0486562	0.0111531	0.00402588	0.0150522	0.0694412	0.0484197	0.0381699	0.765082
GSM4643732_E11.5gonad_CTGTGCTTCAGTACGT	0.459861	0.0262715	0.0102516	0.00981592	0.0537319	0.221116	0.0268796	0.192073
GSM4643732_E11.5gonad_CTGTTTAAGTGTACCT	0.0119494	0.0214849	0.00568146	0.000203422	0.0599544	0.883156	0.0169381	0.000632286
GSM4643732_E11.5gonad_CTGTTTAGTTCAACCA	0.0612752	0.00826592	0.0021539	0.000627175	0.00978749	0.899984	0.00557541	0.0123307
GSM4643732_E11.5gonad_CTTAACTAGCATCATC	0.699388	0.0314882	0.00633784	0.0233746	0.0167201	0.0175506	0.0148716	0.19027
GSM4643732_E11.5gonad_CTTAACTCACAGGAGT	0.0126858	0.264893	0.136741	0.0120448	0.389278	0.0600406	0.118063	0.0062524
GSM4643732_E11.5gonad_CTTAACTGTCCGTGAC	0.000897811	0.0224776	0.0971805	0.00114894	0.641381	0.213176	0.0233431	0.000394689
GSM4643732_E11.5gonad_CTTACCGCACTTGGAT	0.0823766	0.868602	0.0155834	0.000897137	0.0121654	0.0172335	0.00141277	0.00172931
GSM4643732_E11.5gonad_CTTACCGTCTACTATC	0.60524	0.0375109	0.0185916	0.0133613	0.0689675	0.194742	0.0517219	0.00986509
GSM4643732_E11.5gonad_CTTACCGTCTTGCAAG	8.21784e-05	0.0374192	0.582763	9.25966e-05	0.0446981	0.33349	0.00127856	0.000176212
GSM4643732_E11.5gonad_CTTAGGACACCTATCC	0.0625981	0.090212	0.106539	0.126686	0.21799	0.125156	0.114961	0.155859
GSM4643732_E11.5gonad_CTTAGGAGTCCATCCT	0.0363086	0.262914	0.00854785	0.000226984	0.00470479	0.67944	0.00727414	0.000583163
GSM4643732_E11.5gonad_CTTAGGATCCTTGCCA	0.91138	0.0114817	0.00338325	0.0137828	0.00851865	0.0053115	0.00717402	0.0389677
GSM4643732_E11.5gonad_CTTCTCTAGGGTATCG	0.0305633	0.0646634	0.0387802	0.0132203	0.426321	0.123156	0.238478	0.0648175
GSM4643732_E11.5gonad_CTTCTCTAGTGTCCCG	0.0780341	0.0470878	0.0285031	0.0149594	0.126965	0.462543	0.228041	0.0138674
GSM4643732_E11.5gonad_CTTGGCTAGGCATGGT	0.448194	0.265857	0.0267888	0.001711	0.0431515	0.116349	0.0950181	0.00293046
GSM4643732_E11.5gonad_CTTGGCTGTAACGTTC	0.0539541	0.0208521	0.0124564	0.0117635	0.294531	0.161701	0.434182	0.0105602
GSM4643732_E11.5gonad_CTTGGCTGTTATGCGT	0.512137	0.0355873	0.0119628	0.0559737	0.0556141	0.012271	0.0663483	0.250106
GSM4643732_E11.5gonad_CTTGGCTTCCATGAGT	0.498279	0.104551	0.0167318	0.011941	0.0956249	0.198921	0.0377483	0.0362027
GSM4643732_E11.5gonad_GAAATGACAATGTTGC	0.277608	0.0478868	0.010402	0.00561998	0.119071	0.437558	0.0550157	0.046838
GSM4643732_E11.5gonad_GAAATGACACGGCGTT	0.0020776	0.00403774	0.00664317	0.00224765	0.31699	0.187131	0.473312	0.0075601
GSM4643732_E11.5gonad_GAACATCCACACTGCG	0.0243998	0.0589935	0.022545	0.0050178	0.283632	0.183719	0.417284	0.00440895
GSM4643732_E11.5gonad_GAACATCCATGTAGTC	0.0225139	0.00683693	0.00137912	0.00195331	0.0329514	0.0759792	0.015671	0.842715
GSM4643732_E11.5gonad_GAACATCCATTCACTT	0.181958	0.0180832	0.00850063	0.00596897	0.509988	0.237346	0.0288032	0.00935195
GSM4643732_E11.5gonad_GAACCTAAGACAATAC	0.949282	0.00802326	0.000190983	0.00035266	0.0204084	0.0138166	0.00222064	0.00570585
GSM4643732_E11.5gonad_GAACCTAGTGCACTTA	0.00736572	0.00118836	0.000389169	0.00205697	0.10458	0.0382798	0.0658607	0.78028
GSM4643732_E11.5gonad_GAACCTATCAGAGGTG	0.908793	0.0278299	0.00878686	0.00696744	0.0245558	0.00601853	0.004929	0.012119
GSM4643732_E11.5gonad_GAACCTATCTGTGCAA	0.0614324	0.0229407	0.112856	0.0253799	0.364657	0.221976	0.178534	0.0122234
GSM4643732_E11.5gonad_GAACCTATCTTGAGGT	0.144331	0.0520012	0.0224518	0.0216314	0.13641	0.1432	0.334028	0.145947
GSM4643732_E11.5gonad_GAACGGAAGAAGGCCT	0.185018	0.0173512	0.00947724	0.0255753	0.0480012	0.00704015	0.061585	0.645951
GSM4643732_E11.5gonad_GAACGGAGTAAACGCG	0.767438	0.0961123	0.0149378	0.00626936	0.0227872	0.060161	0.0246849	0.00760908
GSM4643732_E11.5gonad_GAACGGAGTGACGGTA	0.0350167	0.0858281	0.0495974	0.0070842	0.10957	0.0470682	0.218666	0.44717
GSM4643732_E11.5gonad_GAACGGATCTCTAAGG	0.0314994	0.142328	0.131253	0.01751	0.0702639	0.0169275	0.0542729	0.535945
GSM4643732_E11.5gonad_GAAGCAGGTGCCTGTG	0.345499	0.0345631	0.0137908	0.0491481	0.0360454	0.073978	0.101286	0.345689
GSM4643732_E11.5gonad_GAATAAGGTCAAGCGA	0.726352	0.0785785	0.0190243	0.0118242	0.0375952	0.0931378	0.0137928	0.0196951
GSM4643732_E11.5gonad_GAATAAGGTTTCCACC	0.309346	0.135576	0.0256614	0.00975388	0.0824098	0.065645	0.284282	0.087326
GSM4643732_E11.5gonad_GAATGAACAATGAATG	0.0383732	0.0365412	0.117219	0.00967012	0.548553	0.11118	0.115633	0.0228301
GSM4643732_E11.5gonad_GACAGAGCATCCAACA	0.00382537	0.100291	0.0268426	0.00476233	0.433398	0.362236	0.065743	0.0029006
GSM4643732_E11.5gonad_GACAGAGGTGAAGGCT	0.00140272	0.0112901	0.00489696	0.000187146	0.0445893	0.936915	0.000660499	5.88098e-05
GSM4643732_E11.5gonad_GACAGAGTCATCATTC	0.0183196	0.655953	0.0491799	6.77227e-05	0.00653901	0.268691	0.00104257	0.000207045
GSM4643732_E11.5gonad_GACAGAGTCATTTGGG	0.523708	0.0243974	0.0160147	0.0218013	0.150998	0.0696655	0.0634685	0.129947
GSM4643732_E11.5gonad_GACAGAGTCTCTTATG	0.100046	0.0264611	0.00595312	0.00623692	0.0940699	0.280913	0.0114068	0.474913
GSM4643732_E11.5gonad_GACCAATCATTGCGGC	0.880794	0.0223846	0.00321322	0.00333747	0.0161943	0.0652295	0.00324089	0.00560568
GSM4643732_E11.5gonad_GACGCGTGTCTTGTCC	0.0859844	0.0549153	0.0236155	0.0174837	0.111047	0.14204	0.239473	0.325441
GSM4643732_E11.5gonad_GACGCGTTCAGCTCTC	0.24004	0.0322466	0.00742249	0.0187148	0.0578538	0.158714	0.0257289	0.459279
GSM4643732_E11.5gonad_GACGGCTCATCCAACA	0.517806	0.0219522	0.00702728	0.0110633	0.0533183	0.0363562	0.0531045	0.299372
GSM4643732_E11.5gonad_GACGGCTGTCAAGCGA	0.00704976	0.00921592	0.00744364	0.00110124	0.429204	0.495171	0.0113835	0.0394308
GSM4643732_E11.5gonad_GACGGCTGTGACCAAG	0.167118	0.0102555	0.0031401	0.00325032	0.191841	0.504577	0.0423948	0.077424
GSM4643732_E11.5gonad_GACGTGCGTAGGGACT	0.000350344	0.000387943	0.000160356	1.19938e-05	0.00421693	0.0123052	0.982402	0.000165102
GSM4643732_E11.5gonad_GACGTGCTCCATTCTA	0.0463005	0.0697159	0.267729	0.00156586	0.0439345	0.560374	0.00887824	0.00150276
GSM4643732_E11.5gonad_GACGTTAAGATGAGAG	0.0614393	0.0500282	0.00998901	0.00853078	0.17103	0.56651	0.121948	0.0105246
GSM4643732_E11.5gonad_GACGTTAAGCTCCCAG	0.173496	0.0210909	0.0153432	0.00662746	0.0496117	0.583512	0.010821	0.139497
GSM4643732_E11.5gonad_GACGTTAAGGCAGGTT	0.00221354	0.0178864	0.0036323	0.000845701	0.370939	0.552465	0.0205308	0.0314874
GSM4643732_E11.5gonad_GACGTTAGTCTAGAGG	0.0411968	0.0142159	0.0167666	0.00520314	0.15841	0.108231	0.166756	0.48922
GSM4643732_E11.5gonad_GACGTTATCCCAACGG	6.39279e-07	3.53412e-06	3.90043e-06	4.56208e-07	7.49468e-05	0.000950403	0.998963	3.12999e-06
GSM4643732_E11.5gonad_GACTAACAGCTCCTCT	0.167018	0.0367742	0.0136417	0.045645	0.064872	0.0723932	0.09303	0.506626
GSM4643732_E11.5gonad_GACTAACGTTGATTGC	0.0889172	0.0876594	0.0219065	0.0274455	0.295602	0.0363532	0.0969116	0.345204
GSM4643732_E11.5gonad_GACTAACTCAGCAACT	0.292964	0.0147644	0.00459131	0.0040356	0.0313337	0.132518	0.0187712	0.501022
GSM4643732_E11.5gonad_GACTACACACACGCTG	3.55663e-06	2.25509e-05	1.21751e-05	9.54334e-05	0.00215911	0.000726802	0.0006991	0.996281
GSM4643732_E11.5gonad_GACTACACAGGGAGAG	0.0696819	0.129305	0.0226011	0.00530374	0.073812	0.593534	0.0983727	0.00739024
GSM4643732_E11.5gonad_GACTACAGTCAGAATA	0.827342	0.0153986	0.00409574	0.0089941	0.0140831	0.0122449	0.0126542	0.105187
GSM4643732_E11.5gonad_GACTGCGCACCTATCC	0.468633	0.0457127	0.0320667	0.0330874	0.0258859	0.0394524	0.0258965	0.329265
GSM4643732_E11.5gonad_GAGCAGAAGAGCCTAG	0.194509	0.0360603	0.00646651	0.0040473	0.101127	0.566385	0.0244316	0.0669728
GSM4643732_E11.5gonad_GAGCAGACAACGCACC	0.132087	0.014004	0.00802797	0.0621426	0.246091	0.0568558	0.0589792	0.421813
GSM4643732_E11.5gonad_GAGGTGAAGTTACGGG	0.460552	0.0075345	0.00244467	0.005671	0.0193485	0.0498174	0.0118095	0.442822
GSM4643732_E11.5gonad_GAGGTGACACATCCAA	0.0092316	0.0175643	0.00762222	0.00164361	0.043693	0.177515	0.741906	0.000824498
GSM4643732_E11.5gonad_GAGGTGACACCATCCT	0.0659394	0.0450421	0.0461954	0.0142165	0.29512	0.299126	0.138387	0.0959744
GSM4643732_E11.5gonad_GAGGTGATCCCGACTT	1.49884e-06	6.73905e-06	6.76493e-06	1.18481e-06	0.000103207	0.00230749	0.99757	2.64309e-06
GSM4643732_E11.5gonad_GAGGTGATCTCGAGTA	0.374841	0.023625	0.00248867	0.000884514	0.046048	0.534781	0.00700829	0.0103232
GSM4643732_E11.5gonad_GAGTCCGTCCGGCACA	0.0262962	0.0209279	0.0370862	0.00470507	0.328754	0.321378	0.255402	0.00545064
GSM4643732_E11.5gonad_GATCAGTCACATTAGC	0.0258863	0.085912	0.0403671	0.0034265	0.11371	0.659735	0.0635669	0.00739619
GSM4643732_E11.5gonad_GATCAGTCACCAGGCT	0.77755	0.186214	0.0083158	0.00381182	0.00485265	0.00933997	0.00121692	0.00869904
GSM4643732_E11.5gonad_GATCAGTCAGTCGATT	0.482727	0.0711941	0.0147347	0.00447686	0.0167408	0.13636	0.00757186	0.266195
GSM4643732_E11.5gonad_GATCAGTGTATATCCG	0.367351	0.0329026	0.0299305	0.00781596	0.039276	0.183205	0.0494302	0.290089
GSM4643732_E11.5gonad_GATCAGTTCGCCGTGA	0.000945816	0.000476173	0.000131499	0.000116257	0.00716512	0.00737068	0.00348289	0.980312
GSM4643732_E11.5gonad_GATCGATCACGGCTAC	0.698611	0.0126361	0.0033729	0.00050833	0.00402088	0.279221	0.000397708	0.00123207
GSM4643732_E11.5gonad_GATCGATTCACAACGT	0.624071	0.194358	0.0108335	0.00157266	0.0482846	0.109852	0.00662062	0.00440867
GSM4643732_E11.5gonad_GATCGCGAGAAAGTGG	0.00360587	0.104466	0.0150681	0.000523305	0.347219	0.511148	0.0145091	0.00346044
GSM4643732_E11.5gonad_GATCGCGAGGATGCGT	0.448831	0.0233133	0.00917992	0.0304746	0.0189739	0.00869583	0.0263732	0.434159
GSM4643732_E11.5gonad_GATCGCGGTGTCAATC	0.0558207	0.260082	0.0509336	0.00966286	0.0784122	0.535708	0.00803783	0.00134356
GSM4643732_E11.5gonad_GATCGTACACAAGCCC	0.000120075	0.000380285	0.000209564	3.89183e-05	0.00256292	0.955529	0.0411508	8.15592e-06
GSM4643732_E11.5gonad_GATCGTACAGCCACCA	0.863612	0.0107715	0.00381897	0.018749	0.0139031	0.00905107	0.0132481	0.0668462
GSM4643732_E11.5gonad_GATCTAGGTAAGGATT	0.00346342	0.0261097	0.0475976	0.00762983	0.214041	0.681632	0.0193068	0.000219951
GSM4643732_E11.5gonad_GATGAAAAGTGTCTCA	0.316283	0.0182088	0.00974491	0.0248123	0.0295206	0.0130983	0.0470033	0.541328
GSM4643732_E11.5gonad_GATGAAACACGCTTTC	0.0903575	0.0730534	0.0330606	0.0251253	0.107533	0.229852	0.0249429	0.416075
GSM4643732_E11.5gonad_GATGAAACAGATGGGT	0.0068722	0.0142111	0.68651	0.00129235	0.108069	0.169635	0.01124	0.00216988
GSM4643732_E11.5gonad_GATGAAACATCCCATC	0.92772	0.0351205	0.00373012	0.00376768	0.00779736	0.016065	0.00230447	0.00349506
GSM4643732_E11.5gonad_GATGAAAGTCATACTG	0.0358523	0.00440948	0.00164263	0.000596581	0.00281352	0.879974	0.00472982	0.0699819
GSM4643732_E11.5gonad_GATGCTAAGTACCGGA	0.0195222	0.0234895	0.015144	0.161431	0.503894	0.044548	0.166799	0.0651722
GSM4643732_E11.5gonad_GATGCTATCCATTCTA	0.95666	0.00833497	0.00209821	0.01023	0.00567206	0.00851947	0.00318759	0.00529817
GSM4643732_E11.5gonad_GATTCAGGTGCCTTGG	0.974192	0.00733866	0.000828841	7.45215e-05	0.00518041	0.0117231	0.000496645	0.000166264
GSM4643732_E11.5gonad_GCAAACTAGACTAAGT	0.0302924	0.213702	0.0495163	0.00550273	0.202684	0.397419	0.0974248	0.00345801
GSM4643732_E11.5gonad_GCAAACTAGGTTACCT	0.00968973	0.209386	0.096971	0.00196067	0.0832661	0.329152	0.25918	0.0103945
GSM4643732_E11.5gonad_GCAAACTCACACATGT	0.0029524	0.00708334	0.00171722	0.00062047	0.698678	0.0692256	0.0134087	0.206314
GSM4643732_E11.5gonad_GCAAACTTCATTCACT	0.0564467	0.098266	0.0104096	0.0158155	0.0452538	0.0114152	0.0335215	0.728872
GSM4643732_E11.5gonad_GCAATCAAGGCAGTCA	0.00505272	0.0265561	0.0148883	0.138871	0.726101	0.0130291	0.0649942	0.0105077
GSM4643732_E11.5gonad_GCAATCACAAAGCGGT	0.231882	0.195892	0.0166034	0.00269674	0.0717043	0.47331	0.0061829	0.00172909
GSM4643732_E11.5gonad_GCAATCACACATGGGA	0.000572077	0.0333073	0.0345367	8.07889e-05	0.116571	0.812844	0.00205183	3.60383e-05
GSM4643732_E11.5gonad_GCAATCAGTGCCTTGG	0.016302	0.0705295	0.040775	0.0311012	0.222759	0.561416	0.0557737	0.00134352
GSM4643732_E11.5gonad_GCAATCATCTGCTGCT	0.08814	0.0607567	0.063471	0.0130702	0.241175	0.405651	0.0914918	0.0362445
GSM4643732_E11.5gonad_GCAATCATCTTACCTA	0.155877	0.0255616	0.0147901	0.0216831	0.0521713	0.00909723	0.0415272	0.679293
GSM4643732_E11.5gonad_GCACATACAAGACGTG	0.0440432	0.00692635	0.00188922	0.000555941	0.0556664	0.867453	0.0058716	0.0175946
GSM4643732_E11.5gonad_GCACATACAATGGAAT	0.00360292	0.017301	0.00885338	0.00124018	0.275068	0.679058	0.0144935	0.000383003
GSM4643732_E11.5gonad_GCACATAGTACCGTTA	0.0293112	0.303601	0.0784945	0.0033175	0.147864	0.39722	0.0368326	0.00335949
GSM4643732_E11.5gonad_GCACATATCGCTTGTC	0.15924	0.0133784	0.00126775	0.0029276	0.0062025	0.00434116	0.00630719	0.806336
GSM4643732_E11.5gonad_GCACTCTAGCTCCCAG	0.236061	0.0373571	0.0204777	0.0416924	0.0428978	0.0237209	0.0787034	0.51909
GSM4643732_E11.5gonad_GCACTCTCAACACCTA	0.919572	0.00867304	0.00296301	0.0117325	0.00708655	0.0164779	0.00612655	0.0273684
GSM4643732_E11.5gonad_GCACTCTCAAGCCATT	0.00117482	0.0530391	0.382113	0.000861828	0.0248382	0.532622	0.00513689	0.000213923
GSM4643732_E11.5gonad_GCACTCTCAAGGACTG	0.675989	0.107311	0.013264	0.0150178	0.0606896	0.0240943	0.0230913	0.0805425
GSM4643732_E11.5gonad_GCACTCTGTACAGTGG	0.131787	0.0264337	0.0109548	0.0218138	0.287855	0.113468	0.158863	0.248825
GSM4643732_E11.5gonad_GCACTCTGTTGGTGGA	0.225252	0.251894	0.0402554	0.00667696	0.24473	0.141523	0.0796652	0.0100042
GSM4643732_E11.5gonad_GCACTCTTCGCGATCG	0.291574	0.0174029	0.00701524	0.0284098	0.018616	0.00557796	0.030517	0.600887
GSM4643732_E11.5gonad_GCAGCCAAGGAATGGA	0.0747562	0.076187	0.00472237	0.00175593	0.00857325	0.82955	0.00216984	0.00228571
GSM4643732_E11.5gonad_GCAGCCAAGTACCGGA	0.188527	0.0475539	0.0361006	0.0434162	0.195281	0.028074	0.376589	0.0844581
GSM4643732_E11.5gonad_GCAGCCACACTCGACG	0.0593333	0.426444	0.157992	0.0108112	0.180271	0.124479	0.0145732	0.0260965
GSM4643732_E11.5gonad_GCAGCCAGTCTCTTAT	0.00544865	0.00469572	0.0014481	0.00087957	0.0069248	0.0196437	0.00477137	0.956188
GSM4643732_E11.5gonad_GCAGCCAGTGCTCTTC	0.00321979	0.000414774	0.000177372	0.0019649	0.00803325	0.000738663	0.00319227	0.982259
GSM4643732_E11.5gonad_GCAGTTAAGCTAACAA	0.193271	0.0169025	0.00169357	0.000531197	0.0253266	0.721809	0.0252248	0.0152418
GSM4643732_E11.5gonad_GCAGTTAGTCGAGTTT	0.172083	0.107837	0.0229625	0.0154629	0.288437	0.196654	0.187577	0.00898726
GSM4643732_E11.5gonad_GCATACAGTCGATTGT	0.0354077	0.107251	0.258351	0.0518459	0.389241	0.0552247	0.097711	0.00496854
GSM4643732_E11.5gonad_GCATACATCATGTCCC	0.574818	0.0145247	0.00160712	0.00237572	0.0352423	0.105537	0.006879	0.259016
GSM4643732_E11.5gonad_GCATACATCTAGCACA	0.0129215	0.131383	0.642799	0.0031484	0.0298906	0.119343	0.0192572	0.0412575
GSM4643732_E11.5gonad_GCATGATCAGCAGTTT	0.962454	0.00462386	0.00111586	0.00363648	0.00840252	0.00606539	0.00740833	0.00629341
GSM4643732_E11.5gonad_GCATGTAAGCCTCGTG	0.91853	0.0071694	0.00120228	0.00081252	0.00845002	0.0481078	0.00328554	0.0124427
GSM4643732_E11.5gonad_GCATGTAAGTGGCACA	0.0758755	0.0623519	0.0265307	0.0330616	0.238045	0.138941	0.249686	0.175509
GSM4643732_E11.5gonad_GCATGTAAGTGGGATC	0.694869	0.0316797	0.00571151	0.0157965	0.0155864	0.0141906	0.013903	0.208264
GSM4643732_E11.5gonad_GCATGTAAGTTCGCAT	0.272316	0.0459467	0.0233498	0.0164938	0.161318	0.07423	0.279629	0.126716
GSM4643732_E11.5gonad_GCATGTACACGTAAGG	0.00599189	0.0105689	0.000938659	0.00187076	0.11205	0.00830615	0.00409335	0.85618
GSM4643732_E11.5gonad_GCCAAATTCACCATAG	0.160361	0.105488	0.0320565	0.00681207	0.11311	0.28199	0.289892	0.0102907
GSM4643732_E11.5gonad_GCCAAATTCGCATGGC	0.000597795	0.000985527	0.000443031	1.07616e-05	0.030189	0.954186	0.00779628	0.00579124
GSM4643732_E11.5gonad_GCCTCTATCTTTAGTC	0.0239213	0.0281038	0.00851336	0.00433519	0.0644404	0.647147	0.0169605	0.206578
GSM4643732_E11.5gonad_GCGACCAAGATGCCTT	0.288307	0.0403972	0.0164365	0.0092828	0.434884	0.0371845	0.0482845	0.125223
GSM4643732_E11.5gonad_GCGACCAAGCACGCCT	0.0152561	0.00143421	0.00119785	0.00311048	0.114973	0.0760558	0.0191721	0.768801
GSM4643732_E11.5gonad_GCGACCACAGTAACGG	0.0254921	0.0123925	0.00761191	0.0124823	0.20681	0.280268	0.0424302	0.412513
GSM4643732_E11.5gonad_GCGAGAAGTATGAAAC	0.62447	0.192547	0.00334238	0.0023164	0.0225468	0.144928	0.00273912	0.00711048
GSM4643732_E11.5gonad_GCGAGAATCTTCATGT	0.851045	0.0546818	0.0056346	0.00201775	0.0147216	0.0437267	0.0102326	0.01794
GSM4643732_E11.5gonad_GCGCAACCAATCAGAA	0.613036	0.14448	0.0129099	0.0285966	0.0507083	0.0115592	0.0565222	0.0821874
GSM4643732_E11.5gonad_GCGCAACTCACGCGGT	0.00114378	0.0472717	0.133788	0.000900148	0.0195335	0.763462	0.0286319	0.00526877
GSM4643732_E11.5gonad_GCGCAGTCATTGCGGC	0.586369	0.04704	0.0103982	0.0174003	0.0790759	0.218466	0.0338776	0.00737312
GSM4643732_E11.5gonad_GCGCCAACACATTTCT	0.572254	0.012953	0.00770692	0.00724416	0.188779	0.0279718	0.0278221	0.155269
GSM4643732_E11.5gonad_GCGCCAAGTAAATACG	0.540633	0.105482	0.00287213	0.000917009	0.0110364	0.278368	0.0061099	0.0545821
GSM4643732_E11.5gonad_GCGCCAAGTAAGGGAA	0.000618526	0.157564	0.242807	0.0108347	0.124947	0.460899	0.00186605	0.000462808
GSM4643732_E11.5gonad_GCGCCAAGTCCAGTAT	0.0078172	0.0281132	0.0328516	0.00126161	0.260994	0.373257	0.27771	0.0179947
GSM4643732_E11.5gonad_GCGCCAAGTGAGCGAT	0.000602767	0.00324935	0.00643921	0.0023314	0.62436	0.066148	0.291671	0.00519773
GSM4643732_E11.5gonad_GCGCCAATCCCTCAGT	0.21372	0.00339513	0.00103782	0.00292658	0.00431036	0.00975592	0.00416022	0.760694
GSM4643732_E11.5gonad_GCGGGTTAGATAGTCA	0.648265	0.0160418	0.00646631	0.0210645	0.0261476	0.0371645	0.0223735	0.222476
GSM4643732_E11.5gonad_GCGGGTTAGTCATGCT	0.0346281	0.0419245	0.138825	0.00737678	0.160674	0.56923	0.044372	0.00297031
GSM4643732_E11.5gonad_GCGGGTTCAAGTCTAC	0.000210417	0.0344722	0.236911	0.0023356	0.376098	0.344982	0.00465516	0.000334953
GSM4643732_E11.5gonad_GCGGGTTGTTCAACCA	0.0342419	0.0175413	0.0044537	0.000105064	0.0222263	0.918303	0.00224652	0.000882487
GSM4643732_E11.5gonad_GCTCCTACAGCTGTTA	0.0394964	0.103118	0.0208863	0.000636884	0.0106485	0.823947	0.000842639	0.000424444
GSM4643732_E11.5gonad_GCTCTGTGTTATTCTC	0.113399	0.061012	0.02541	0.012304	0.106331	0.283284	0.0697154	0.328545
GSM4643732_E11.5gonad_GCTCTGTTCATGCTCC	0.0454476	0.0153847	0.0107082	0.0176375	0.0520651	0.0168891	0.0590237	0.782844
GSM4643732_E11.5gonad_GCTGCAGCAGATCGGA	0.445088	0.0157512	0.0154224	0.00869917	0.177867	0.256471	0.0660582	0.0146435
GSM4643732_E11.5gonad_GCTGCAGCATGCTGGC	0.363793	0.16746	0.0100292	0.011349	0.199664	0.169268	0.0205389	0.0578978
GSM4643732_E11.5gonad_GCTGCAGCATTGGTAC	0.0291602	0.00449757	0.000995397	0.000144881	0.00585248	0.954466	0.00352147	0.00136218
GSM4643732_E11.5gonad_GCTGCAGTCAGTCCCT	0.0501362	0.0517214	0.0463388	0.0569524	0.381572	0.0338585	0.225664	0.153757
GSM4643732_E11.5gonad_GCTGCAGTCGCGGATC	0.252832	0.018906	0.00394386	0.00384152	0.056353	0.565471	0.0412231	0.0574289
GSM4643732_E11.5gonad_GCTGCGAAGGGAAACA	0.337384	0.0727478	0.0177456	0.0602686	0.193213	0.219234	0.0537981	0.0456089
GSM4643732_E11.5gonad_GCTGCGACAGGTCTCG	0.038631	0.0167949	0.00938243	0.164919	0.0502668	0.0775055	0.119047	0.523453
GSM4643732_E11.5gonad_GCTGCGATCGGTTAAC	0.0144615	0.0365728	0.0053454	0.00170893	0.0101646	0.00779429	0.00763553	0.916317
GSM4643732_E11.5gonad_GCTGCTTAGATGCCTT	0.875537	0.110253	0.00373854	0.000781585	0.00313711	0.00535304	0.000474508	0.000724947
GSM4643732_E11.5gonad_GCTGCTTCATGCAACT	0.00946531	0.00707841	0.00115167	0.00138022	0.00692637	0.0129364	0.00388871	0.957173
GSM4643732_E11.5gonad_GCTGCTTTCAACTCTT	0.663192	0.0231947	0.00460293	0.0044452	0.0147657	0.238295	0.0102021	0.0413027
GSM4643732_E11.5gonad_GCTGGGTCAAGCGAGT	0.30981	0.127985	0.0129356	0.00751062	0.17102	0.196789	0.162788	0.0111621
GSM4643732_E11.5gonad_GCTGGGTCACATAACC	0.000827546	0.00380069	0.0100519	0.000567971	0.573262	0.294454	0.11301	0.00402581
GSM4643732_E11.5gonad_GCTTCCACAAGCTGGA	0.452283	0.131293	0.0119255	0.00387608	0.195963	0.0998936	0.079695	0.0250712
GSM4643732_E11.5gonad_GCTTGAACACTTCGAA	0.001924	0.0763262	0.275945	0.00303993	0.366031	0.21231	0.0631863	0.00123821
GSM4643732_E11.5gonad_GCTTGAATCACCCGAG	0.0112439	0.0991549	0.0108571	0.505525	0.0476948	0.316764	0.00600913	0.00275091
GSM4643732_E11.5gonad_GCTTGAATCTGGTATG	0.0820771	0.0196498	0.00238571	0.000245204	0.0146983	0.877135	0.000824977	0.00298437
GSM4643732_E11.5gonad_GGAACTTTCTCACATT	0.00407764	0.00547379	0.00110952	9.91142e-05	0.0121995	0.904857	0.0721368	4.65521e-05
GSM4643732_E11.5gonad_GGAATAACACACATGT	0.0644235	0.051954	0.00405268	0.00117617	0.0170442	0.177606	0.0105696	0.673174
GSM4643732_E11.5gonad_GGAATAAGTACACCGC	0.267336	0.02868	0.0254606	0.0263045	0.0384126	0.0163078	0.0345888	0.56291
GSM4643732_E11.5gonad_GGACAAGAGATATACG	0.11872	0.0368629	0.00750915	0.00526442	0.14291	0.482392	0.040174	0.166167
GSM4643732_E11.5gonad_GGACAAGGTTCCACGG	0.899659	0.013149	0.00444024	0.00994356	0.00896143	0.0111121	0.00975236	0.0429823
GSM4643732_E11.5gonad_GGACAGAAGCCTTGAT	0.0146854	0.0122035	0.00404804	0.0126897	0.0368293	0.0114561	0.0238647	0.884223
GSM4643732_E11.5gonad_GGACAGAAGGGAAACA	0.708627	0.0277063	0.00927805	0.0223166	0.0174781	0.0199596	0.0220655	0.172568
GSM4643732_E11.5gonad_GGACAGATCATGTAGC	0.037848	0.0729	0.00764806	0.0193965	0.678985	0.153236	0.0273879	0.00259798
GSM4643732_E11.5gonad_GGACATTAGGTTACCT	0.821679	0.0499455	0.0083712	0.0677617	0.0116023	0.0121423	0.00768046	0.0208173
GSM4643732_E11.5gonad_GGACATTTCTTCATGT	0.78631	0.0983761	0.0166953	0.00137087	0.00412843	0.0895041	0.0020356	0.00157944
GSM4643732_E11.5gonad_GGACGTCAGTACGATA	0.244408	0.0128304	0.00459293	0.0208107	0.0731568	0.0219927	0.0291063	0.593103
GSM4643732_E11.5gonad_GGACGTCGTGTCTGAT	0.0208807	0.017174	0.0456368	0.00355525	0.0972241	0.546214	0.206033	0.0632821
GSM4643732_E11.5gonad_GGAGCAAGTCGGGTCT	0.773914	0.0357471	0.00863143	0.024245	0.0217456	0.024615	0.0251602	0.0859416
GSM4643732_E11.5gonad_GGATGTTAGTTCGCGC	0.00250801	0.00567525	0.0343461	0.000242063	0.0249335	0.92731	0.00495375	3.13549e-05
GSM4643732_E11.5gonad_GGATGTTTCACCTCGT	0.477638	0.0563637	0.0220815	0.013312	0.0509669	0.0797941	0.107309	0.192535
GSM4643732_E11.5gonad_GGATGTTTCTAACTCT	0.0154737	0.00765007	0.00289785	0.0116737	0.011934	0.00487064	0.0292726	0.916227
GSM4643732_E11.5gonad_GGCAATTAGGGCACTA	0.0760395	0.0432897	0.0115048	0.00148252	0.0170267	0.833904	0.0108777	0.00587499
GSM4643732_E11.5gonad_GGCAATTTCCCTCAGT	0.573825	0.0635853	0.00672194	0.0143492	0.0263788	0.0132226	0.017879	0.284038
GSM4643732_E11.5gonad_GGCGACTAGCTCTCGG	0.190419	0.00625085	0.00360676	0.000534373	0.115879	0.671676	0.00940139	0.0022325
GSM4643732_E11.5gonad_GGCGACTAGGGTTTCT	0.0311468	0.0531082	0.00336254	0.000735498	0.165577	0.699642	0.0349319	0.0114966
GSM4643732_E11.5gonad_GGCGACTGTACGCACC	0.0218122	0.242692	0.242604	0.00530712	0.0429763	0.410063	0.0173604	0.0171849
GSM4643732_E11.5gonad_GGCGACTGTTAGATGA	0.960572	0.00405309	0.00101323	0.00252593	0.00787529	0.0101197	0.00307155	0.0107695
GSM4643732_E11.5gonad_GGCGTGTCAGTCCTTC	0.00562001	0.00589854	0.012772	0.000595532	0.0955369	0.848198	0.0307463	0.000632799
GSM4643732_E11.5gonad_GGCGTGTTCGGAAACG	0.000740455	0.0206602	0.484093	0.00153253	0.254527	0.213576	0.0232168	0.0016543
GSM4643732_E11.5gonad_GGCTCGAAGATGAGAG	0.323262	0.018471	0.00718652	0.0298665	0.0305415	0.00798689	0.0322548	0.550431
GSM4643732_E11.5gonad_GGCTCGAGTGGACGAT	0.000345603	0.01943	0.03517	0.000101078	0.0997815	0.839596	0.00552182	5.35255e-05
GSM4643732_E11.5gonad_GGCTGGTAGTGACATA	0.105488	0.0327047	0.0156169	0.015423	0.234547	0.174626	0.106978	0.314616
GSM4643732_E11.5gonad_GGGAATGAGGGCTTCC	0.0134133	0.113318	0.0859642	0.00773613	0.498617	0.107833	0.168572	0.00454716
GSM4643732_E11.5gonad_GGGAATGAGTACGTTC	0.0855363	0.0429595	0.0116137	0.00529432	0.0135338	0.3352	0.0132926	0.49257
GSM4643732_E11.5gonad_GGGAATGTCGTGACAT	0.811593	0.00813963	0.00212852	0.00280737	0.00720619	0.13624	0.00653769	0.0253481
GSM4643732_E11.5gonad_GGGACCTCAAGTAGTA	0.0391873	0.0215229	0.0355979	0.00639656	0.172062	0.305336	0.374705	0.0451922
GSM4643732_E11.5gonad_GGGACCTCACTGTGTA	0.146986	0.415824	0.0813967	0.0134726	0.115376	0.156659	0.0453724	0.0249135
GSM4643732_E11.5gonad_GGGACCTGTACTCTCC	0.834167	0.0460243	0.00721049	0.000749614	0.0205989	0.0833798	0.00398265	0.00388721
GSM4643732_E11.5gonad_GGGACCTGTGTGCGTC	0.206585	0.0603838	0.0419521	0.0210633	0.230064	0.251521	0.149207	0.0392245
GSM4643732_E11.5gonad_GGGAGATAGTACGCCC	0.13463	0.025896	0.00709996	0.00279417	0.0820884	0.636461	0.108264	0.00276574
GSM4643732_E11.5gonad_GGGAGATGTGCCTGTG	0.557007	0.0453138	0.0233007	0.0163943	0.0535255	0.0334992	0.0440996	0.22686
GSM4643732_E11.5gonad_GGGAGATTCTTCTGGC	0.505125	0.125951	0.0496149	0.00866808	0.0398597	0.178989	0.0445269	0.047265
GSM4643732_E11.5gonad_GGGATGAAGAGTGACC	0.402516	0.0520005	0.034555	0.0430102	0.0432578	0.0505343	0.0770292	0.297097
GSM4643732_E11.5gonad_GGGATGAAGGACAGAA	0.0565534	0.11898	0.0720334	0.00601101	0.235169	0.188078	0.318786	0.00439043
GSM4643732_E11.5gonad_GGGATGAAGTGCGTGA	0.892197	0.0118367	0.0030339	0.0109989	0.0109546	0.0130456	0.00588597	0.052047
GSM4643732_E11.5gonad_GGGATGAGTATAATGG	0.301959	0.0635316	0.0198406	0.0127595	0.0456734	0.366218	0.0280875	0.161931
GSM4643732_E11.5gonad_GGGATGAGTTGAACTC	0.191508	0.601255	0.0266143	0.0214984	0.0502853	0.100501	0.00671269	0.00162486
GSM4643732_E11.5gonad_GGGCACTAGATCCCGC	0.00508267	0.0493732	0.321813	0.00133822	0.0980301	0.466606	0.0561133	0.00164341
GSM4643732_E11.5gonad_GGGCACTAGTCTCCTC	0.00690945	0.0646817	0.0581592	0.00585042	0.472303	0.245368	0.144096	0.0026322
GSM4643732_E11.5gonad_GGGCACTTCGGATGGA	0.498321	0.0797705	0.00437562	0.017767	0.0315369	0.03517	0.0121859	0.320873
GSM4643732_E11.5gonad_GGGCACTTCTGGGCCA	0.00764178	0.0101256	0.00221282	0.000610012	0.0248065	0.944809	0.00966086	0.000133732
GSM4643732_E11.5gonad_GGGCATCTCAAAGACA	3.67098e-05	0.00937491	0.0291811	4.00956e-05	0.0671394	0.890713	0.00349007	2.50083e-05
GSM4643732_E11.5gonad_GGGTCTGGTAACGCGA	0.632051	0.020757	0.00706187	0.0308751	0.0231354	0.0141665	0.0393559	0.232597
GSM4643732_E11.5gonad_GGGTTGCCACTTCTGC	0.014386	0.00946653	0.00977796	0.0154149	0.447697	0.344766	0.0835343	0.0749579
GSM4643732_E11.5gonad_GGTGAAGGTGCCTTGG	0.751893	0.0305029	0.00683326	0.0285466	0.0158425	0.0136154	0.0170265	0.13574
GSM4643732_E11.5gonad_GGTGAAGTCTTATCTG	0.11335	0.0124331	0.00573407	0.0161131	0.234201	0.140087	0.403745	0.0743366
GSM4643732_E11.5gonad_GGTGTTAAGAGGGCTT	0.253333	0.0494102	0.0285556	0.123457	0.127115	0.0743836	0.115103	0.228642
GSM4643732_E11.5gonad_GGTGTTAAGTGAAGAG	0.000349551	0.0128154	0.0481964	0.000360309	0.030592	0.865087	0.0422823	0.000317208
GSM4643732_E11.5gonad_GGTGTTAGTTATCGGT	0.120117	0.00887957	0.0104201	0.00233198	0.0403142	0.774848	0.0421044	0.000985
GSM4643732_E11.5gonad_GTAACGTAGACAGACC	0.363963	0.132817	0.0267999	0.0173351	0.0840822	0.188375	0.130194	0.0564329
GSM4643732_E11.5gonad_GTAACGTAGCAATCTC	0.757801	0.058654	0.010069	0.00528062	0.0380456	0.0796882	0.0127429	0.0377185
GSM4643732_E11.5gonad_GTAACGTGTACGCTGC	0.683973	0.0127063	0.00499097	0.0146443	0.0243947	0.018088	0.0322719	0.208931
GSM4643732_E11.5gonad_GTAACGTGTTATCACG	0.568386	0.0238273	0.0077746	0.0181521	0.0209928	0.0190979	0.0276899	0.314079
GSM4643732_E11.5gonad_GTAACGTTCGCGTAGC	0.0451908	0.20061	0.0666714	0.0105827	0.303789	0.339297	0.0186203	0.0152388
GSM4643732_E11.5gonad_GTAACGTTCTCGGACG	0.336621	0.362426	0.0554434	0.00368554	0.0270446	0.169871	0.0102248	0.0346835
GSM4643732_E11.5gonad_GTAACTGGTCGGGTCT	0.38011	0.0399986	0.0149127	0.0291564	0.0552159	0.0252474	0.102134	0.353225
GSM4643732_E11.5gonad_GTACGTAAGGCTATCT	0.438741	0.0718724	0.0225107	0.0530537	0.0680231	0.0339194	0.068388	0.243492
GSM4643732_E11.5gonad_GTACGTAGTAGCGCAA	0.18774	0.0050824	0.0017242	0.00256994	0.00526051	0.0172431	0.0107716	0.769608
GSM4643732_E11.5gonad_GTACGTAGTAGTACCT	0.619851	0.0346878	0.00656662	0.0338635	0.0202628	0.00860709	0.0242985	0.251862
GSM4643732_E11.5gonad_GTACTCCAGGAGTCTG	0.0107458	0.014054	0.0780103	0.000539869	0.0316562	0.859401	0.00545841	0.000134515
GSM4643732_E11.5gonad_GTACTCCCAGATCCAT	0.00277236	0.00807501	0.109987	0.00355752	0.312803	0.298653	0.262207	0.00194572
GSM4643732_E11.5gonad_GTACTCCTCAACACAC	0.634323	0.039029	0.00752867	0.022172	0.017293	0.00900038	0.0446306	0.226024
GSM4643732_E11.5gonad_GTACTCCTCTGCTGCT	0.00996936	0.060623	0.158421	0.00148911	0.0733235	0.692551	0.00213356	0.00148983
GSM4643732_E11.5gonad_GTACTTTAGTATCTCG	0.00486366	0.00271062	0.0159109	0.000194911	0.0335273	0.934528	0.00759673	0.000667854
GSM4643732_E11.5gonad_GTACTTTAGTCCGGTC	0.123767	0.0602747	0.00936961	0.0080101	0.164331	0.101771	0.0131951	0.519281
GSM4643732_E11.5gonad_GTACTTTTCCGGGTGT	0.571574	0.0764992	0.00878963	0.00446926	0.055214	0.22407	0.0106877	0.0486966
GSM4643732_E11.5gonad_GTAGGCCGTTGAACTC	0.0513399	0.0342249	0.0370843	0.0715174	0.18007	0.0340094	0.12842	0.463334
GSM4643732_E11.5gonad_GTAGGCCTCGGAGCAA	0.80564	0.00954406	0.00179583	0.00760214	0.0253111	0.0832726	0.00861124	0.0582235
GSM4643732_E11.5gonad_GTAGGCCTCGGTTAAC	0.010901	0.00867126	0.00134076	0.00188281	0.0111363	0.0278454	0.00373286	0.93449
GSM4643732_E11.5gonad_GTATCTTCATCCGTGG	0.179729	0.0420441	0.0281869	0.0124099	0.18278	0.0574324	0.459239	0.038179
GSM4643732_E11.5gonad_GTATCTTGTGACGCCT	0.205441	0.0418308	0.0140007	0.0276142	0.423477	0.153893	0.0704081	0.0633348
GSM4643732_E11.5gonad_GTATTCTTCCTCCTAG	0.0365071	0.010603	0.00557101	0.0021591	0.0145126	0.105937	0.0249845	0.799726
GSM4643732_E11.5gonad_GTCAAGTGTGTTCGAT	0.64347	0.0455786	0.0182799	0.0342088	0.0563509	0.0371253	0.0932089	0.0717777
GSM4643732_E11.5gonad_GTCAAGTTCCAGAGGA	0.0108178	0.11297	0.0942379	0.00234304	0.310894	0.0718973	0.269341	0.127499
GSM4643732_E11.5gonad_GTCACGGCACCAGTTA	0.000549352	0.029787	0.182217	0.00196534	0.0874269	0.619189	0.0784783	0.000386807
GSM4643732_E11.5gonad_GTCACGGCAGGAATCG	0.0273336	0.0280233	0.0108937	0.00037681	0.0961994	0.819063	0.0119482	0.00616175
GSM4643732_E11.5gonad_GTCATTTAGGTCGGAT	0.187187	0.0638002	0.018635	0.00582947	0.153588	0.544071	0.0140553	0.0128344
GSM4643732_E11.5gonad_GTCATTTGTAGCGTGA	0.423745	0.425627	0.00971657	0.00317637	0.0535969	0.0496445	0.0052262	0.0292674
GSM4643732_E11.5gonad_GTCCTCAAGGCATGGT	0.832521	0.0743719	0.00813231	0.00108582	0.0308257	0.0326878	0.0141697	0.00620538
GSM4643732_E11.5gonad_GTCCTCACATCTCCCA	0.922926	0.0134409	0.00258171	0.00885865	0.0108635	0.0207101	0.00821736	0.0124019
GSM4643732_E11.5gonad_GTCCTCATCCAAGCCG	0.0445516	0.0871837	0.0882168	0.00315036	0.199566	0.572727	0.00354661	0.00105779
GSM4643732_E11.5gonad_GTCCTCATCGCAGGCT	0.165671	0.0435341	0.0063617	0.00225382	0.441223	0.255903	0.0310301	0.0540227
GSM4643732_E11.5gonad_GTCGGGTCACTGTTAG	0.00154303	0.000508177	8.95176e-05	0.000215627	0.00648258	0.00218764	0.000409619	0.988564
GSM4643732_E11.5gonad_GTCGGGTGTAGGGTAC	0.267207	0.0541661	0.0111544	0.0115548	0.357188	0.0629446	0.0552241	0.180562
GSM4643732_E11.5gonad_GTCGTAACACACATGT	0.00642833	0.00164644	0.000510165	0.000824225	0.0133206	0.0135766	0.00786739	0.955826
GSM4643732_E11.5gonad_GTCTCGTGTGCGCTTG	0.193838	0.108449	0.0362373	0.039224	0.299802	0.0800039	0.211448	0.0309982
GSM4643732_E11.5gonad_GTCTTCGCAAAGCAAT	0.123368	0.62469	0.0311553	0.000579328	0.004614	0.213872	0.000650305	0.00107085
GSM4643732_E11.5gonad_GTCTTCGGTATGGTTC	0.478495	0.0353435	0.00647391	0.00176391	0.0148447	0.439406	0.00649318	0.0171797
GSM4643732_E11.5gonad_GTCTTCGGTGCAGACA	0.186319	0.0377961	0.0048142	0.00287056	0.193953	0.3996	0.0237174	0.15093
GSM4643732_E11.5gonad_GTGCAGCAGTGTGAAT	1.84844e-06	9.36901e-06	5.73578e-05	7.5112e-07	0.00164972	0.994998	0.00291069	0.000371951
GSM4643732_E11.5gonad_GTGCAGCCAAGAGTCG	0.141046	0.121553	0.0431745	0.00110208	0.00926583	0.680515	0.00183086	0.00151236
GSM4643732_E11.5gonad_GTGCAGCCACGGTAGA	0.653804	0.058267	0.00491533	0.00497588	0.096134	0.115234	0.0142627	0.052407
GSM4643732_E11.5gonad_GTGCATAAGATCCGAG	0.409804	0.014352	0.00236161	0.00369768	0.0792319	0.19975	0.00994179	0.280862
GSM4643732_E11.5gonad_GTGCATAAGTCATGCT	0.530796	0.0179402	0.00644916	0.027021	0.0140356	0.00573179	0.0190541	0.378972
GSM4643732_E11.5gonad_GTGCATACATAAAGGT	0.00721193	0.0269644	0.0573597	0.00128712	0.339887	0.426025	0.132534	0.00873028
GSM4643732_E11.5gonad_GTGGGTCAGAACAATC	0.778304	0.013243	0.00245403	0.00284306	0.0208355	0.174414	0.00458077	0.00332552
GSM4643732_E11.5gonad_GTGGGTCCAGCGATCC	0.133918	0.00959936	0.00390272	0.00770167	0.0548409	0.543553	0.0325814	0.213902
GSM4643732_E11.5gonad_GTGTGCGTCCTGCCAT	0.368455	0.0537302	0.0117056	0.00715371	0.0831676	0.435029	0.0215694	0.0191897
GSM4643732_E11.5gonad_GTGTTAGAGGGCTTCC	0.00354018	0.00387421	0.00239938	0.00129924	0.0142385	0.0188243	0.944129	0.0116954
GSM4643732_E11.5gonad_GTTACAGAGGGAACGG	0.223946	0.269162	0.0388395	0.0134075	0.0882627	0.188683	0.0827488	0.09495
GSM4643732_E11.5gonad_GTTACAGAGGGAGTAA	0.217259	0.0251568	0.00308854	0.000462402	0.0174462	0.735429	0.000883342	0.000275163
GSM4643732_E11.5gonad_GTTCATTAGCGAGAAA	0.131544	0.368179	0.0400337	0.00302829	0.0723794	0.375284	0.0061369	0.00341489
GSM4643732_E11.5gonad_GTTCATTTCCCTTGCA	0.000461634	0.0736815	0.0617764	0.000472309	0.0174584	0.840981	0.00493952	0.000228953
GSM4643732_E11.5gonad_GTTCGGGCATTTGCCC	0.23568	0.0799535	0.062003	0.0433274	0.114438	0.103684	0.247987	0.112927
GSM4643732_E11.5gonad_GTTCTCGAGAATCTCC	0.00769528	0.16634	0.174099	0.00383163	0.135607	0.451214	0.0578859	0.00332706
GSM4643732_E11.5gonad_GTTCTCGCAATCGGTT	0.00125641	0.0516167	0.0827778	0.00111232	0.191153	0.644606	0.0266233	0.00085439
GSM4643732_E11.5gonad_GTTCTCGCATACAGCT	0.00789107	0.325698	0.0803344	0.000864966	0.0145988	0.568667	0.00136496	0.000581108
GSM4643732_E11.5gonad_GTTCTCGGTTATCCGA	0.000351454	0.00827691	0.0415554	0.000131882	0.436678	0.503893	0.00899563	0.000117037
GSM4643732_E11.5gonad_GTTCTCGGTTTAAGCC	0.129317	0.0262127	0.00461802	0.00854218	0.272206	0.0273134	0.0276405	0.504151
GSM4643732_E11.5gonad_GTTCTCGTCATCTGTT	0.737032	0.0239326	0.00149593	0.00119185	0.0355099	0.194832	0.00084029	0.00516544
GSM4643732_E11.5gonad_GTTCTCGTCCGTTGCT	0.00707261	0.0370687	0.0319103	0.00340388	0.115049	0.167835	0.634087	0.00357332
GSM4643732_E11.5gonad_GTTTCTAGTCTCATCC	0.150446	0.0112824	0.00443591	0.0245224	0.0203664	0.0119112	0.0392211	0.737814
GSM4643732_E11.5gonad_GTTTCTATCTTACCGC	0.47583	0.0168999	0.00502887	0.0354947	0.0215601	0.00951785	0.0213995	0.414269
GSM4643732_E11.5gonad_TAAACCGCACATCCAA	0.853709	0.0208826	0.00586908	0.0179004	0.0161213	0.00591743	0.0202948	0.0593055
GSM4643732_E11.5gonad_TAAACCGCACTTCGAA	3.27752e-05	0.000170512	0.000464787	3.79001e-06	0.00462944	0.993205	0.001493	1.18799e-06
GSM4643732_E11.5gonad_TAAACCGGTAACGCGA	0.884151	0.0165435	0.00510659	0.0165313	0.0165196	0.0207607	0.0125229	0.0278644
GSM4643732_E11.5gonad_TAAACCGGTTACAGAA	0.0488001	0.0188168	0.0122581	0.00596329	0.0644949	0.0891302	0.51957	0.240967
GSM4643732_E11.5gonad_TAAGAGACAGGTGGAT	0.00513281	0.00135356	7.91607e-05	0.000216441	0.0017622	0.00411403	0.000468082	0.986874
GSM4643732_E11.5gonad_TAAGAGATCAGCGACC	0.000132522	0.0168047	0.610405	0.000105876	0.0411015	0.325079	0.00632379	4.80838e-05
GSM4643732_E11.5gonad_TAAGAGATCGTTACAG	0.551289	0.0740381	0.00822652	0.0013468	0.0223562	0.300832	0.0140139	0.0278973
GSM4643732_E11.5gonad_TAAGCGTAGATACACA	0.0898808	0.256859	0.0227651	0.0037236	0.0408373	0.567816	0.0110724	0.00704572
GSM4643732_E11.5gonad_TAAGCGTGTATAAACG	0.555256	0.109644	0.0132147	0.00189916	0.0146409	0.257289	0.0142429	0.0338142
GSM4643732_E11.5gonad_TAAGCGTGTGGTTTCA	0.00176853	0.0290386	0.0283851	8.50183e-05	0.00415979	0.934659	0.00110332	0.000800942
GSM4643732_E11.5gonad_TAAGCGTTCACTCCTG	0.152504	0.0106046	0.00427026	0.0141847	0.0140567	0.00651317	0.0121832	0.785683
GSM4643732_E11.5gonad_TAAGCGTTCTCTTATG	0.000799706	0.00482155	0.846315	0.000314197	0.00695043	0.140062	0.000629953	0.000107124
GSM4643732_E11.5gonad_TAAGTGCCATTCACTT	0.26511	0.114422	0.0344953	0.0084525	0.0985292	0.459103	0.0160443	0.0038433
GSM4643732_E11.5gonad_TAAGTGCTCATACGGT	0.660741	0.0735709	0.0134188	0.0167005	0.0580773	0.0620286	0.0683223	0.0471402
GSM4643732_E11.5gonad_TACACGAAGTAGATGT	0.610765	0.0780612	0.00455483	0.00228738	0.0164883	0.0929749	0.00533748	0.189531
GSM4643732_E11.5gonad_TACACGACAGATGAGC	0.483418	0.194161	0.0195138	0.00397748	0.0350636	0.235135	0.0157551	0.0129755
GSM4643732_E11.5gonad_TACAGTGCAGACACTT	0.0594289	0.00842258	0.00243683	0.0154756	0.0330711	0.00997706	0.0228852	0.848303
GSM4643732_E11.5gonad_TACAGTGTCGTATCAG	0.953437	0.0246079	0.00202787	0.00300466	0.00966424	0.00325335	0.0014084	0.00259699
GSM4643732_E11.5gonad_TACCTATTCTACTATC	0.896747	0.0129538	0.00186603	0.00396675	0.00972899	0.0239434	0.00497681	0.0458176
GSM4643732_E11.5gonad_TACCTTACAGGTCTCG	0.00106551	0.00569169	0.00628771	0.00105583	0.695307	0.272415	0.0157346	0.00244294
GSM4643732_E11.5gonad_TACCTTATCTTAGCCC	0.00133105	0.00437658	0.0101402	0.000116839	0.042889	0.93531	0.00501663	0.000819956
GSM4643732_E11.5gonad_TACGGATAGAGCTTCT	0.00867638	0.00430928	0.0159932	0.0044964	0.512139	0.287868	0.16541	0.00110751
GSM4643732_E11.5gonad_TACGGATTCCGTAGTA	0.675751	0.0548962	0.00912796	0.155674	0.0212071	0.0312837	0.0129519	0.0391083
GSM4643732_E11.5gonad_TACGGGCAGAAGGACA	0.0287729	0.0357682	0.018731	0.00877497	0.162547	0.606699	0.13577	0.00293728
GSM4643732_E11.5gonad_TACGGGCGTAAAGTCA	0.6524	0.0311104	0.00449696	0.0108954	0.0560394	0.112503	0.0139424	0.118612
GSM4643732_E11.5gonad_TACGGGCGTTTGCATG	0.248067	0.308557	0.146566	0.0153205	0.0771071	0.159937	0.037854	0.00659064
GSM4643732_E11.5gonad_TACGGTAAGTTATCGC	0.384177	0.0581638	0.0224266	0.0059399	0.091665	0.365164	0.0460327	0.0264307
GSM4643732_E11.5gonad_TACGGTAGTAGTACCT	0.134898	0.250289	0.0530761	0.0231678	0.415418	0.0335553	0.031447	0.0581493
GSM4643732_E11.5gonad_TACTCATAGGAATGGA	0.266859	0.0719998	0.0237372	0.0410271	0.177884	0.25052	0.118068	0.0499037
GSM4643732_E11.5gonad_TACTCGCTCATCATTC	0.00574017	0.00955059	0.00892515	0.000195467	0.0255703	0.939964	0.0090407	0.0010136
GSM4643732_E11.5gonad_TACTCGCTCGTGGTCG	0.109376	0.0219243	0.00527574	0.0137797	0.0798064	0.153315	0.0305553	0.585967
GSM4643732_E11.5gonad_TACTTACGTCCAACTA	0.0724758	0.109077	0.0160625	0.0367614	0.155093	0.139056	0.0202217	0.451252
GSM4643732_E11.5gonad_TACTTGTAGGTCGGAT	0.911186	0.0274116	0.00116292	0.000471518	0.0070611	0.0358145	0.00627353	0.0106187
GSM4643732_E11.5gonad_TACTTGTGTTACGACT	0.0808945	0.0230645	0.0107981	0.0153391	0.23073	0.0358304	0.485243	0.118101
GSM4643732_E11.5gonad_TAGACCAAGACTAGAT	0.0216016	0.0154685	0.0126861	0.00927159	0.20391	0.0732533	0.626946	0.0368628
GSM4643732_E11.5gonad_TAGACCACAATAACGA	0.959621	0.0120146	0.00157197	0.00262165	0.00862156	0.00883166	0.00277699	0.00394042
GSM4643732_E11.5gonad_TAGACCAGTCTAGCCG	0.00871639	0.000631798	0.00030404	0.000582468	0.00371045	0.0586317	0.00141845	0.926005
GSM4643732_E11.5gonad_TAGCCGGAGGCTCAGA	0.256924	0.0814434	0.0379519	0.00523202	0.0870767	0.371461	0.0611503	0.0987603
GSM4643732_E11.5gonad_TAGCCGGCATGTTGAC	0.00559785	0.0202742	0.00559039	0.00426373	0.768648	0.0861087	0.10395	0.00556762
GSM4643732_E11.5gonad_TAGCCGGGTTCCCTTG	0.9181	0.0123308	0.0034593	0.0038421	0.0274138	0.00788673	0.0151189	0.0118484
GSM4643732_E11.5gonad_TAGGCATAGCCACCTG	0.384525	0.125222	0.028383	0.00659911	0.0845806	0.249835	0.082939	0.0379165
GSM4643732_E11.5gonad_TAGGCATCACTATCTT	0.266748	0.024729	0.0163015	0.0299181	0.0518453	0.011231	0.0790987	0.520128
GSM4643732_E11.5gonad_TAGGCATGTCAATACC	0.0599751	0.0347089	0.00827387	0.0030175	0.309997	0.0360979	0.474864	0.0730656
GSM4643732_E11.5gonad_TAGGCATGTTCAACCA	0.020253	0.00976493	0.0107263	0.00362537	0.0590353	0.0261801	0.140045	0.73037
GSM4643732_E11.5gonad_TAGGCATTCCAGTAGT	0.084727	0.200563	0.0413901	0.0293515	0.266775	0.23232	0.098384	0.0464895
GSM4643732_E11.5gonad_TAGTGGTCACGGTGTC	0.0846438	0.0107108	0.00510163	0.00205766	0.151446	0.637252	0.0991343	0.00965321
GSM4643732_E11.5gonad_TAGTGGTGTGCACGAA	0.898121	0.0124596	0.000567264	0.000413444	0.0069458	0.0647867	0.00133957	0.0153661
GSM4643732_E11.5gonad_TAGTTGGAGAACAACT	0.908449	0.0199664	0.000865659	0.00116309	0.0044178	0.0533174	0.00275872	0.00906209
GSM4643732_E11.5gonad_TAGTTGGAGACGCAAC	0.0503635	0.0102354	0.00524106	0.0167326	0.0109926	0.00468153	0.0184562	0.883297
GSM4643732_E11.5gonad_TAGTTGGAGGACCACA	0.191256	0.0161504	0.0059899	0.0104686	0.0111787	0.0260588	0.0179679	0.720929
GSM4643732_E11.5gonad_TATCAGGGTGCTGTAT	0.615938	0.0290274	0.00570275	0.00986179	0.028215	0.0809297	0.0264967	0.203829
GSM4643732_E11.5gonad_TATCTCACAGCTGTGC	0.0610909	0.0544838	0.0230161	0.00601094	0.0494243	0.0864915	0.221721	0.497762
GSM4643732_E11.5gonad_TATCTCAGTAGCGCAA	0.0320466	0.0198792	0.00121308	0.000990638	0.0322419	0.778259	0.00976667	0.125603
GSM4643732_E11.5gonad_TATCTCATCTTCATGT	0.160694	0.0414992	0.0144659	0.0285402	0.196253	0.0836005	0.227686	0.247261
GSM4643732_E11.5gonad_TATGCCCAGTGGTAGC	0.499613	0.0943529	0.0184402	0.00727502	0.0713422	0.242993	0.056215	0.0097686
GSM4643732_E11.5gonad_TATGCCCCATGATCCA	0.300699	0.123637	0.0222504	0.00570091	0.065877	0.110677	0.29495	0.0762088
GSM4643732_E11.5gonad_TATTACCGTATAGGGC	0.977904	0.00754775	0.00100885	0.00329987	0.00480461	0.0030168	0.000888109	0.00152976
GSM4643732_E11.5gonad_TATTACCGTCCGAAGA	0.130765	0.0112313	0.0083542	0.0215212	0.0750857	0.010131	0.262887	0.480024
GSM4643732_E11.5gonad_TCAATCTAGCGTTTAC	0.800269	0.0134577	0.00426238	0.0201482	0.0119091	0.00791016	0.0115929	0.13045
GSM4643732_E11.5gonad_TCAATCTAGCTAGTGG	0.678675	0.0223081	0.00434883	0.0181888	0.0175173	0.0641548	0.00949008	0.185317
GSM4643732_E11.5gonad_TCACGAAAGTCCCACG	0.108922	0.00575221	0.00153586	0.00027757	0.0052376	0.843982	0.00111354	0.03318
GSM4643732_E11.5gonad_TCACGAAGTAGAAAGG	0.00310958	0.511384	0.199151	0.000841923	0.0670217	0.21641	0.00166351	0.000417365
GSM4643732_E11.5gonad_TCACGAAGTATATGAG	5.89548e-05	0.00328903	0.142966	0.000116505	0.0530992	0.786538	0.0138918	4.07202e-05
GSM4643732_E11.5gonad_TCACGAATCCATGAAC	0.443291	0.0442358	0.0167622	0.00521223	0.0753135	0.301437	0.0610158	0.0527331
GSM4643732_E11.5gonad_TCAGATGAGGGCTCTC	0.555882	0.0220909	0.00780943	0.0153437	0.0201192	0.0256613	0.0241439	0.32895
GSM4643732_E11.5gonad_TCAGATGCACTTACGA	0.225705	0.103297	0.0222957	0.0251478	0.19457	0.132592	0.201472	0.0949206
GSM4643732_E11.5gonad_TCAGCAACACTTCTGC	6.65538e-05	0.000319918	0.00421969	5.1024e-05	0.123351	0.870503	0.00148122	7.77606e-06
GSM4643732_E11.5gonad_TCAGCAAGTTACGTCA	0.0100141	0.00554089	0.0145732	0.0102844	0.0900391	0.568016	0.27819	0.0233423
GSM4643732_E11.5gonad_TCAGCAATCAGCTTAG	0.0594186	0.0254661	0.0152887	0.0306809	0.0963657	0.0200348	0.100373	0.652372
GSM4643732_E11.5gonad_TCAGCTCAGCGACGTA	0.649331	0.0648512	0.017456	0.0164176	0.0694801	0.0140711	0.0578976	0.110496
GSM4643732_E11.5gonad_TCAGCTCAGTGACATA	0.0224147	0.0788281	0.0315546	0.00165162	0.0694168	0.771621	0.0175116	0.00700135
GSM4643732_E11.5gonad_TCAGCTCCAGTCAGAG	0.0305545	0.0163693	0.0140852	0.00807694	0.0402897	0.0661882	0.0370318	0.787404
GSM4643732_E11.5gonad_TCAGCTCTCAGTGCAT	0.25141	0.0306841	0.0195715	0.0157963	0.0414239	0.171327	0.165983	0.303804
GSM4643732_E11.5gonad_TCAGCTCTCGGCGCTA	0.00833163	0.00273641	0.000562988	0.000763768	0.0341181	0.021498	0.0502458	0.881743
GSM4643732_E11.5gonad_TCAGGATAGCGCTTAT	0.0313136	0.0332168	0.0196023	0.0165779	0.196795	0.604814	0.0909895	0.00669154
GSM4643732_E11.5gonad_TCAGGATAGTCATGCT	0.129051	0.0899983	0.0724775	0.0106491	0.197003	0.142715	0.189237	0.168868
GSM4643732_E11.5gonad_TCAGGATCAATGAATG	0.965678	0.0153582	0.000601663	0.00178309	0.00312608	0.00994362	0.00115305	0.00235654
GSM4643732_E11.5gonad_TCAGGTAAGTGACTCT	0.000546953	0.0128287	0.00381564	2.60501e-05	0.0805505	0.875958	0.0262135	6.08554e-05
GSM4643732_E11.5gonad_TCAGGTATCCTTTACA	0.453818	0.0960979	0.0101326	0.0134603	0.030027	0.054932	0.0196251	0.321907
GSM4643732_E11.5gonad_TCATTACCAATAGCGG	0.0267891	0.365593	0.0111402	0.00107528	0.00649608	0.587496	0.00121942	0.00019099
GSM4643732_E11.5gonad_TCATTACCATAGACTC	0.513188	0.0592094	0.00766538	0.18969	0.0479649	0.136041	0.013661	0.0325796
GSM4643732_E11.5gonad_TCATTACTCACTTCAT	0.00783943	0.0287176	0.00532539	7.59923e-05	0.0108499	0.93976	0.00611016	0.0013213
GSM4643732_E11.5gonad_TCATTTGCAAGCTGTT	0.235572	0.329737	0.0168763	0.0142571	0.156324	0.123774	0.043083	0.0803766
GSM4643732_E11.5gonad_TCATTTGCATTAGCCA	0.634002	0.0374777	0.00672297	0.00253119	0.0300229	0.235976	0.0113946	0.0418723
GSM4643732_E11.5gonad_TCATTTGGTAAATGAC	0.508605	0.0980519	0.0271049	0.0047138	0.072226	0.262155	0.00550833	0.0216348
GSM4643732_E11.5gonad_TCATTTGGTTATTCTC	0.00225095	0.0265402	0.114346	0.00290342	0.0771991	0.767404	0.00766289	0.00169373
GSM4643732_E11.5gonad_TCCACACAGCGACGTA	0.61467	0.131745	0.0464146	0.0129763	0.0411828	0.0999572	0.0144706	0.0385832
GSM4643732_E11.5gonad_TCCACACAGCGTAATA	0.387775	0.0141935	0.00520209	0.0227566	0.0132931	0.00506289	0.0168482	0.534869
GSM4643732_E11.5gonad_TCCACACTCATCATTC	0.00080949	0.00320322	0.0293225	0.010942	0.895153	0.00240558	0.0575628	0.000601309
GSM4643732_E11.5gonad_TCCACACTCGAATGGG	0.00967203	0.00687093	0.00202207	0.0043892	0.00800093	0.00966149	0.00568924	0.953694
GSM4643732_E11.5gonad_TCCCGATAGTAGATGT	0.152653	0.0107447	0.0136499	0.023866	0.127364	0.0110754	0.0882747	0.572373
GSM4643732_E11.5gonad_TCCCGATGTGGCAAAC	0.0445362	0.104333	0.00535244	0.00154811	0.068905	0.72233	0.0517662	0.00122938
GSM4643732_E11.5gonad_TCCCGATTCGTAGGTT	0.0228915	0.0055523	0.00546959	0.00396837	0.32757	0.0619028	0.0667218	0.505924
GSM4643732_E11.5gonad_TCCCGATTCTGCTGTC	0.00868905	0.0531562	0.866058	0.0016279	0.0245396	0.0429573	0.00240987	0.000561995
GSM4643732_E11.5gonad_TCGAGGCAGCTGTTCA	0.023187	0.0982011	0.0408858	0.00404983	0.30212	0.381568	0.147393	0.00259514
GSM4643732_E11.5gonad_TCGAGGCCACAGAGGT	0.646147	0.0178297	0.00614731	0.0258956	0.0135605	0.0059682	0.0172907	0.267161
GSM4643732_E11.5gonad_TCGAGGCTCCGAATGT	0.000186243	0.0260794	0.0211018	9.35574e-05	0.0502713	0.895822	0.00626073	0.000184917
GSM4643732_E11.5gonad_TCGAGGCTCGACAGCC	0.0383676	0.38964	0.179123	0.00428435	0.0439078	0.331041	0.0121746	0.00146082
GSM4643732_E11.5gonad_TCGCGAGTCACATGCA	0.499778	0.0308245	0.00723049	0.0232885	0.0411864	0.0111736	0.0387843	0.347734
GSM4643732_E11.5gonad_TCGCGTTAGTCACGCC	0.719389	0.196259	0.00317747	0.000917364	0.00205002	0.0763122	0.00105952	0.000835641
GSM4643732_E11.5gonad_TCGGGACAGGCTCATT	0.343344	0.0782187	0.0130368	0.00342551	0.0353023	0.489974	0.0306964	0.00600247
GSM4643732_E11.5gonad_TCGGGACCAGACGCTC	0.405868	0.0555207	0.0479043	0.0370023	0.123418	0.0949392	0.0864491	0.148899
GSM4643732_E11.5gonad_TCGGGACGTCCGAATT	0.00370091	0.0261381	0.032492	0.00623488	0.326303	0.154388	0.447079	0.0036641
GSM4643732_E11.5gonad_TCGGGACTCTGGCGAC	0.610851	0.100077	0.0430351	0.0199793	0.0569889	0.0506888	0.0622177	0.0561623
GSM4643732_E11.5gonad_TCGGTAACAAACTGTC	0.737442	0.106444	0.00976711	0.00361974	0.0387053	0.0839839	0.0133932	0.00664433
GSM4643732_E11.5gonad_TCGGTAATCAGTTCGA	0.511711	0.0316668	0.0104014	0.0062674	0.136934	0.26686	0.0235766	0.0125833
GSM4643732_E11.5gonad_TCGTACCCACTACAGT	0.000459295	0.0496234	0.083266	0.000281661	0.00986668	0.854594	0.00168187	0.000226712
GSM4643732_E11.5gonad_TCGTAGATCCAAGTAC	0.00851199	0.0918074	0.00774593	0.000121304	0.00658393	0.883658	0.00138289	0.00018825
GSM4643732_E11.5gonad_TCTATTGAGCAATATG	0.0547046	0.0217427	0.0121551	0.014274	0.0433768	0.0802721	0.103363	0.670112
GSM4643732_E11.5gonad_TCTATTGCATTCTCAT	0.864473	0.0466561	0.00272125	0.00189151	0.010712	0.0657885	0.00283391	0.00492371
GSM4643732_E11.5gonad_TCTATTGGTATGCTTG	0.0877206	0.049163	0.0186583	0.016716	0.122343	0.125958	0.510542	0.0688997
GSM4643732_E11.5gonad_TCTATTGGTTTAGGAA	0.360388	0.065772	0.0235939	0.0364567	0.0988171	0.0135891	0.0948664	0.306517
GSM4643732_E11.5gonad_TCTCATAGTCCAACTA	0.241518	0.0110962	0.00433019	0.0134231	0.0114108	0.00859746	0.0147086	0.694916
GSM4643732_E11.5gonad_TCTCATAGTCTGCCAG	0.231951	0.030357	0.0200524	0.0127829	0.127461	0.490401	0.0506861	0.0363087
GSM4643732_E11.5gonad_TCTCATATCCACTCCA	0.00193616	0.0247589	0.604009	0.00125258	0.214804	0.0911545	0.0599591	0.00212572
GSM4643732_E11.5gonad_TCTCTAAGTGCACCAC	0.00420273	0.0359683	0.851411	0.0110046	0.0172288	0.0666859	0.0117786	0.00171964
GSM4643732_E11.5gonad_TCTCTAAGTTTGTGTG	0.012372	0.0401363	0.0653854	0.0213416	0.50057	0.233128	0.121432	0.00563528
GSM4643732_E11.5gonad_TCTGAGAAGTGTGAAT	0.140852	0.0517851	0.175722	0.0260078	0.271269	0.0683528	0.171822	0.0941896
GSM4643732_E11.5gonad_TCTGAGACACTTAACG	0.0602191	0.0167443	0.00156941	0.0373436	0.0213244	0.0484303	0.0261117	0.788257
GSM4643732_E11.5gonad_TCTGAGAGTGCGAAAC	0.882387	0.0105418	0.00368025	0.00824987	0.013205	0.0489233	0.0105653	0.0224474
GSM4643732_E11.5gonad_TCTGGAAGTAATCGTC	0.655662	0.0543662	0.00428547	0.000977162	0.0207255	0.254752	0.00416259	0.00506922
GSM4643732_E11.5gonad_TCTTCGGAGTCTCGGC	0.898538	0.0213383	0.00364918	0.00587467	0.0124068	0.0319636	0.00747465	0.0187551
GSM4643732_E11.5gonad_TCTTCGGCATGCCACG	0.0289763	0.0130388	0.012828	0.0102974	0.167763	0.250414	0.359012	0.157671
GSM4643732_E11.5gonad_TCTTTCCAGTGCGTGA	0.0037796	0.0107274	0.0114219	0.00650771	0.501443	0.364375	0.091534	0.0102113
GSM4643732_E11.5gonad_TCTTTCCGTTATTCTC	0.0223563	0.236899	0.0915191	0.57002	0.0471773	0.0255292	0.00448733	0.00201213
GSM4643732_E11.5gonad_TCTTTCCTCCGTACAA	0.027874	0.0254876	0.00536515	0.00251627	0.211491	0.175918	0.528944	0.0224047
GSM4643732_E11.5gonad_TGAAAGAAGCGTAATA	0.877824	0.0187396	0.00238607	0.00353869	0.00769321	0.0217117	0.0101037	0.0580029
GSM4643732_E11.5gonad_TGAAAGACAGCCTGTG	1.89304e-05	0.000233777	0.00182333	2.63259e-05	0.0380465	0.957631	0.00211503	0.000104621
GSM4643732_E11.5gonad_TGAAAGACAGCGTCCA	0.00262835	0.0399717	0.0275355	0.00077788	0.0975662	0.823733	0.00705934	0.000727967
GSM4643732_E11.5gonad_TGACAACTCTTCTGGC	0.000339623	0.00795477	0.00672107	1.75778e-05	0.012184	0.972421	0.000353536	8.51944e-06
GSM4643732_E11.5gonad_TGACGGCGTAGCGATG	0.893957	0.0496467	0.00381483	0.00525963	0.00930918	0.0267205	0.00406236	0.00722935
GSM4643732_E11.5gonad_TGACGGCTCAACTCTT	0.144206	0.119442	0.0194868	0.00326247	0.149159	0.45039	0.109316	0.00473754
GSM4643732_E11.5gonad_TGACGGCTCCGCGCAA	0.286016	0.146803	0.0318229	0.0127632	0.0591546	0.0354717	0.178941	0.249027
GSM4643732_E11.5gonad_TGACTAGGTGGTGTAG	0.0243085	0.0167885	0.0107993	0.00182786	0.0806702	0.808984	0.0518573	0.00476408
GSM4643732_E11.5gonad_TGACTAGTCATCGATG	0.00120345	0.00054073	0.000616098	0.000982651	0.00981928	0.00370254	0.00338508	0.97975
GSM4643732_E11.5gonad_TGACTAGTCGGATGGA	0.851484	0.0477199	0.00689635	0.00144115	0.00651754	0.0684951	0.00266203	0.0147834
GSM4643732_E11.5gonad_TGACTTTAGCTAAACA	0.182962	0.0499547	0.0297393	0.00281504	0.199654	0.437149	0.0819783	0.0157481
GSM4643732_E11.5gonad_TGACTTTCACCCAGTG	0.855884	0.0703498	0.00337291	0.00730734	0.023343	0.0140231	0.00530275	0.020417
GSM4643732_E11.5gonad_TGACTTTTCCGTCATC	0.0845214	0.0862653	0.0634069	0.0125916	0.117563	0.0924167	0.0662834	0.476952
GSM4643732_E11.5gonad_TGAGAGGAGTTTAGGA	0.029158	0.0258929	0.00499203	0.00191336	0.775533	0.136611	0.024769	0.00113153
GSM4643732_E11.5gonad_TGAGAGGCACGTCAGC	3.3095e-05	0.00105644	0.0167533	0.0002566	0.0988683	0.880916	0.00210774	8.51484e-06
GSM4643732_E11.5gonad_TGAGAGGCATACAGCT	0.0562241	0.02743	0.157608	0.0221837	0.318521	0.155	0.0842044	0.178828
GSM4643732_E11.5gonad_TGAGAGGGTTACGCGC	0.0104397	0.159938	0.254451	0.00792405	0.160119	0.10972	0.286282	0.0111268
GSM4643732_E11.5gonad_TGAGAGGTCTTGCCGT	0.0768967	0.00632579	0.00214011	0.0109729	0.00820862	0.0173192	0.0122496	0.865887
GSM4643732_E11.5gonad_TGAGCCGAGACAGAGA	0.179576	0.090961	0.0515007	0.00976925	0.0382053	0.423296	0.0476019	0.15909
GSM4643732_E11.5gonad_TGAGCCGCACGAAATA	0.155913	0.250691	0.0429914	0.0419175	0.0760799	0.0242327	0.035741	0.372434
GSM4643732_E11.5gonad_TGAGCCGGTCACCCAG	0.000280786	0.00117873	0.00604201	0.000321394	0.16859	0.571249	0.252129	0.000208869
GSM4643732_E11.5gonad_TGAGGGAAGACGACGT	0.000896322	0.00124825	0.00116846	0.00059106	0.0185054	0.00454208	0.971179	0.00186952
GSM4643732_E11.5gonad_TGAGGGACAACACCCG	0.22175	0.00617168	0.00140418	0.00320152	0.0080779	0.0213686	0.0150213	0.723005
GSM4643732_E11.5gonad_TGAGGGACAGGCGATA	0.258135	0.0502383	0.00685916	0.00597204	0.0103258	0.0401584	0.0171324	0.611179
GSM4643732_E11.5gonad_TGAGGGATCCGCGTTT	0.064102	0.150369	0.0616569	0.0445091	0.37728	0.0751944	0.178217	0.0486709
GSM4643732_E11.5gonad_TGATTTCTCGAATCCA	0.422361	0.118085	0.00419838	0.00369232	0.08498	0.28183	0.0100729	0.0747807
GSM4643732_E11.5gonad_TGCACCTGTCTCCATC	0.47635	0.0835184	0.00934393	0.000936019	0.00656142	0.420097	0.000951464	0.00224161
GSM4643732_E11.5gonad_TGCACCTTCGCCTGTT	0.000193512	0.0510213	0.0357527	0.00017124	0.21712	0.67321	0.0224424	8.85026e-05
GSM4643732_E11.5gonad_TGCCAAATCCTTGGTC	0.525129	0.106132	0.00921472	0.128313	0.0460468	0.0913162	0.00739848	0.0864496
GSM4643732_E11.5gonad_TGCCCATAGCACAGGT	0.0527555	0.772693	0.0150082	0.000791972	0.0389348	0.10839	0.00728475	0.00414241
GSM4643732_E11.5gonad_TGCCCATCATACCATG	0.0243175	0.062407	0.035679	0.0713063	0.498946	0.0802453	0.165735	0.0613639
GSM4643732_E11.5gonad_TGCCCTACAAGTCTAC	0.977095	0.00361485	0.000611916	0.00125493	0.00263253	0.0112502	0.0010592	0.00248112
GSM4643732_E11.5gonad_TGCCCTAGTCAGATAA	0.0061668	0.0142199	0.00164879	5.64284e-05	0.00690814	0.930491	0.04042	8.84264e-05
GSM4643732_E11.5gonad_TGCCCTAGTCAGCTAT	0.00331493	0.00933597	0.0528344	0.00215179	0.459032	0.46342	0.00633214	0.00357867
GSM4643732_E11.5gonad_TGCCCTATCAGCTCTC	0.401465	0.062195	0.018893	0.0167416	0.0666436	0.261651	0.037219	0.135192
GSM4643732_E11.5gonad_TGCCCTATCCAGAGGA	0.44329	0.0202877	0.00817175	0.0317192	0.0167865	0.00612126	0.0236126	0.450011
GSM4643732_E11.5gonad_TGCGCAGGTCCCGACA	0.0555419	0.0370162	0.247662	0.0150238	0.155366	0.379637	0.103971	0.00578218
GSM4643732_E11.5gonad_TGCGGGTAGCTTATCG	0.586357	0.0250812	0.0105106	0.0388017	0.0236084	0.0134249	0.0296603	0.272556
GSM4643732_E11.5gonad_TGCGGGTGTGCAGTAG	0.447695	0.0245475	0.0117509	0.022417	0.0238582	0.0115027	0.0265369	0.431692
GSM4643732_E11.5gonad_TGCGTGGAGACTTTCG	0.814758	0.0503788	0.00768361	0.0124566	0.0238858	0.0833011	0.00277846	0.00475808
GSM4643732_E11.5gonad_TGCGTGGAGAGCAATT	0.13354	0.0140772	0.00605034	0.0188131	0.0282636	0.00546118	0.039923	0.753872
GSM4643732_E11.5gonad_TGCGTGGAGGAACTGC	0.0529613	0.0418028	0.0145196	0.0127957	0.546106	0.154374	0.164125	0.0133159
GSM4643732_E11.5gonad_TGCGTGGGTGGTGTAG	0.0610887	0.00216268	0.00181509	0.00169592	0.178294	0.082666	0.0198753	0.652402
GSM4643732_E11.5gonad_TGCTACCAGGCCCTTG	0.208968	0.0056192	0.00433689	0.0168907	0.0543084	0.182543	0.0588895	0.468445
GSM4643732_E11.5gonad_TGCTACCCACGGTGTC	0.849105	0.0476095	0.000871328	0.000452003	0.0113739	0.0809118	0.000861225	0.00881492
GSM4643732_E11.5gonad_TGCTGCTCAGATCGGA	0.634413	0.073116	0.00885857	0.00482327	0.0265579	0.244494	0.0049312	0.00280624
GSM4643732_E11.5gonad_TGCTGCTCAGCGTAAG	0.689203	0.0163915	0.00718178	0.0286382	0.0341511	0.0167454	0.0821662	0.125523
GSM4643732_E11.5gonad_TGCTGCTCATCGGGTC	0.00659999	0.00155194	0.000199667	0.000184405	0.0151763	0.0202093	0.00225225	0.953826
GSM4643732_E11.5gonad_TGCTGCTGTGCAACTT	0.0647404	0.0548179	0.00523295	0.0216314	0.162186	0.353754	0.167862	0.169776
GSM4643732_E11.5gonad_TGCTGCTTCCTGTAGA	0.0836364	0.0409287	0.0390133	0.00983156	0.101188	0.150217	0.158209	0.416977
GSM4643732_E11.5gonad_TGGACGCGTTGGTAAA	0.0939444	0.190159	0.115596	0.00813405	0.0469105	0.379717	0.0358619	0.129677
GSM4643732_E11.5gonad_TGGACGCTCAGCTCTC	0.335329	0.161863	0.0558517	0.0130339	0.161453	0.224016	0.0414482	0.00700466
GSM4643732_E11.5gonad_TGGCCAGGTATTAGCC	0.3444	0.0226231	0.00462459	0.0243264	0.0186139	0.062069	0.00929907	0.514044
GSM4643732_E11.5gonad_TGGCCAGGTCACCTAA	0.0713389	0.0417334	0.0443542	0.0164656	0.126874	0.0488628	0.117136	0.533235
GSM4643732_E11.5gonad_TGGCCAGTCAACTCTT	0.525249	0.0188412	0.0105862	0.0125357	0.145961	0.180872	0.0425437	0.0634106
GSM4643732_E11.5gonad_TGGCGCAAGAACTGTA	0.29651	0.0124656	0.0137936	0.0144376	0.142882	0.0431756	0.0800329	0.396703
GSM4643732_E11.5gonad_TGGCGCAGTCCAACTA	0.0343855	0.0751647	0.0346348	0.00586315	0.368464	0.193023	0.241312	0.0471526
GSM4643732_E11.5gonad_TGGCGCAGTCTGCAAT	0.0306914	0.00448152	0.00114673	0.0285362	0.043164	0.00361341	0.0139347	0.874432
GSM4643732_E11.5gonad_TGGCGCAGTTGATTCG	0.0478827	0.247831	0.0336376	0.00140276	0.0830714	0.537432	0.0474729	0.00126974
GSM4643732_E11.5gonad_TGGCTGGTCATATCGG	0.504302	0.0325401	0.0126018	0.0355265	0.0434222	0.010128	0.0759375	0.285542
GSM4643732_E11.5gonad_TGGCTGGTCGAATGGG	0.926971	0.00769713	0.00304319	0.0104319	0.00792152	0.00962845	0.00674485	0.0275621
GSM4643732_E11.5gonad_TGGCTGGTCTCCGGTT	0.537568	0.0347444	0.0161348	0.0123896	0.125321	0.159833	0.0475852	0.0664249
GSM4643732_E11.5gonad_TGGGAAGCACATCCGG	0.235532	0.0540957	0.011963	0.0185185	0.0920303	0.0168782	0.285209	0.285774
GSM4643732_E11.5gonad_TGGGAAGGTCACTGGC	0.0986238	0.101535	0.0793543	0.013719	0.103183	0.540886	0.0452439	0.0174559
GSM4643732_E11.5gonad_TGGGCGTCAGATGGCA	0.230714	0.0236687	0.00308154	0.00962639	0.0318888	0.0657773	0.0152849	0.619959
GSM4643732_E11.5gonad_TGGGCGTCATCCGCGA	0.000209029	0.00939325	0.00622713	0.00833127	0.93209	0.0401909	0.00206014	0.00149799
GSM4643732_E11.5gonad_TGGTTAGAGTTGCAGG	0.0166989	0.0858656	0.149977	0.00234043	0.174636	0.536809	0.0329418	0.000730608
GSM4643732_E11.5gonad_TGGTTCCGTGATGTCT	0.0322535	0.00199753	0.00102451	0.000332822	0.00851893	0.634831	0.00451796	0.316524
GSM4643732_E11.5gonad_TGGTTCCTCACAACGT	0.67189	0.0159331	0.00527818	0.0205647	0.0112848	0.00603006	0.0146853	0.254334
GSM4643732_E11.5gonad_TGTATTCCATGCTAGT	0.000120019	0.00122377	0.0323659	6.27169e-05	0.106178	0.855683	0.00427599	9.06431e-05
GSM4643732_E11.5gonad_TGTATTCGTGTGGTTT	0.117474	0.377919	0.103169	0.00508612	0.030182	0.353219	0.00846947	0.00448054
GSM4643732_E11.5gonad_TGTCCCACACCTCGGA	0.000272727	0.0077218	0.0178655	0.00163097	0.109897	0.855854	0.00591129	0.000846693
GSM4643732_E11.5gonad_TGTCCCACATACTACG	0.000104438	0.00255565	0.00654066	4.35798e-05	0.0184137	0.916679	0.0556277	3.55173e-05
GSM4643732_E11.5gonad_TGTCCCATCCAAATGC	0.0452097	0.00355475	0.00247022	0.00138515	0.0163718	0.814512	0.0093931	0.107103
GSM4643732_E11.5gonad_TGTGGTAGTGATGATA	0.411052	0.298734	0.0197354	0.0148057	0.0734518	0.0208402	0.0952986	0.0660821
GSM4643732_E11.5gonad_TGTGGTATCATCGCTC	0.471798	0.0340284	0.00466296	0.0282488	0.144378	0.284594	0.0167234	0.0155668
GSM4643732_E11.5gonad_TGTGTTTAGTGAACAT	0.213769	0.0260883	0.0120991	0.0827104	0.0492378	0.0303774	0.0460403	0.539678
GSM4643732_E11.5gonad_TGTGTTTGTCGAAAGC	0.0239554	0.00738854	0.00325445	0.0186041	0.784408	0.140438	0.0192275	0.00272411
GSM4643732_E11.5gonad_TGTGTTTGTCTCTTAT	0.0063822	0.0060327	0.00778066	0.00252006	0.583678	0.275173	0.0759164	0.0425172
GSM4643732_E11.5gonad_TGTTCCGAGTCACGCC	0.284746	0.27593	0.0927817	0.00809563	0.0754277	0.201495	0.0280574	0.0334671
GSM4643732_E11.5gonad_TGTTCCGCATCTACGA	0.0833954	0.046735	0.138311	0.00672638	0.210055	0.253182	0.112582	0.149014
GSM4643732_E11.5gonad_TGTTCCGGTCACCTAA	0.326138	0.0248729	0.011008	0.0382888	0.0375617	0.00912417	0.0533718	0.499634
GSM4643732_E11.5gonad_TTAACTCGTAGCCTCG	0.614106	0.0195963	0.010669	0.029232	0.0394517	0.0101243	0.0668603	0.209961
GSM4643732_E11.5gonad_TTAACTCTCTCCGGTT	0.0131198	0.00503799	0.00431187	0.000112305	0.023273	0.950281	0.00366629	0.000197605
GSM4643732_E11.5gonad_TTAGGACAGAAACCGC	0.000441819	0.000967736	0.00892704	0.000236737	0.0414762	0.909237	0.037955	0.000758435
GSM4643732_E11.5gonad_TTAGGACGTCTGATTG	0.0109408	0.590468	0.0560238	0.000417545	0.0106401	0.322369	0.00820227	0.000938675
GSM4643732_E11.5gonad_TTAGGACTCGGCTACG	0.123998	0.058636	0.035192	0.0463494	0.152537	0.0262499	0.213603	0.343435
GSM4643732_E11.5gonad_TTAGGCACAACACGCC	0.394609	0.102357	0.0199791	0.0185594	0.0492781	0.0649545	0.225736	0.124527
GSM4643732_E11.5gonad_TTAGGCATCTGAAAGA	0.000419842	0.00237207	0.018158	3.60587e-05	0.0105841	0.965895	0.00251451	2.07797e-05
GSM4643732_E11.5gonad_TTAGGCATCTGTCCGT	0.00729695	0.0132655	0.0115191	0.00262881	0.267999	0.656257	0.0260343	0.0149992
GSM4643732_E11.5gonad_TTAGTTCAGAAGATTC	0.252923	0.0395259	0.00869941	0.00117378	0.010222	0.684015	0.00130891	0.00213218
GSM4643732_E11.5gonad_TTAGTTCGTGCACGAA	0.000202658	0.00160535	0.00628468	4.79997e-05	0.0114037	0.444668	0.535679	0.000108419
GSM4643732_E11.5gonad_TTATGCTGTACCATCA	0.883041	0.0503348	0.00709377	0.00686831	0.0126763	0.0224096	0.00645048	0.0111256
GSM4643732_E11.5gonad_TTATGCTGTCTTGCGG	0.502952	0.0258126	0.0117902	0.0388139	0.0337318	0.00877212	0.0573041	0.320823
GSM4643732_E11.5gonad_TTCCCAGGTTCACCTC	0.862621	0.0244421	0.00621895	0.0396619	0.0118376	0.00733745	0.00872631	0.0391544
GSM4643732_E11.5gonad_TTCCCAGTCGCGTTTC	0.460656	0.0226593	0.00744694	0.0187412	0.0491177	0.0485221	0.0301964	0.36266
GSM4643732_E11.5gonad_TTCGAAGCAGGAATGC	0.013882	0.0104929	0.00265122	0.00552599	0.0234923	0.00780541	0.0189473	0.917203
GSM4643732_E11.5gonad_TTCGAAGGTCCATGAT	0.875595	0.0135046	0.00432619	0.0189377	0.0140097	0.00564777	0.0139221	0.0540567
GSM4643732_E11.5gonad_TTCGAAGTCTGAGGGA	0.849286	0.00971372	0.00143517	0.00330726	0.00767534	0.0206723	0.00630241	0.101608
GSM4643732_E11.5gonad_TTCTCAAAGCGTTTAC	0.597826	0.029621	0.0191205	0.00701528	0.051926	0.248709	0.0282405	0.0175421
GSM4643732_E11.5gonad_TTCTCAATCCTCAATT	0.00767777	0.000795713	0.00125093	0.000751237	0.884379	0.00858572	0.0917708	0.00478903
GSM4643732_E11.5gonad_TTCTCCTTCAGTTTGG	0.409427	0.158971	0.0204585	0.0410304	0.271063	0.038876	0.0354516	0.0247232
GSM4643732_E11.5gonad_TTCTTAGGTATGAATG	0.56571	0.0878921	0.0234441	0.00246162	0.046674	0.21849	0.0490319	0.0062961
GSM4643732_E11.5gonad_TTGAACGGTCACCCAG	0.0330201	0.0136242	0.0179693	0.0104632	0.477781	0.113908	0.319643	0.0135921
GSM4643732_E11.5gonad_TTGAACGTCGCATGGC	0.427034	0.0929366	0.0458925	0.043634	0.0790645	0.0951623	0.0578343	0.158442
GSM4643732_E11.5gonad_TTGACTTCACAAGTAA	0.133503	0.460279	0.0222016	0.00102538	0.0141081	0.346866	0.0108645	0.011153
GSM4643732_E11.5gonad_TTGACTTGTACACCGC	0.525219	0.348307	0.00422802	0.00131567	0.0822239	0.0148652	0.0125968	0.0112451
GSM4643732_E11.5gonad_TTGACTTGTTCGTGAT	0.158212	0.0180857	0.00515674	0.0229922	0.0437283	0.0123972	0.139836	0.599592
GSM4643732_E11.5gonad_TTGCCGTAGAGGTACC	0.0246515	0.210959	0.189585	0.00210491	0.117009	0.4359	0.0182071	0.00158395
GSM4643732_E11.5gonad_TTGCCGTTCACCGTAA	0.00147495	0.0135046	0.0835431	0.00051017	0.12249	0.76883	0.008731	0.000916046
GSM4643732_E11.5gonad_TTGCGTCAGCACACAG	0.237148	0.036128	0.00371515	0.00344538	0.0204564	0.112068	0.0179302	0.569109
GSM4643732_E11.5gonad_TTGCGTCCACGGTTTA	0.529035	0.077136	0.0129114	0.00914659	0.233655	0.0738147	0.0278853	0.0364153
GSM4643732_E11.5gonad_TTGCGTCTCATCGCTC	0.0927049	0.0599827	0.022885	0.00949561	0.404931	0.283947	0.11901	0.007044
GSM4643732_E11.5gonad_TTGGAACAGAACTCGG	0.328627	0.151918	0.0389791	0.0172751	0.0482213	0.374062	0.0136312	0.0272864
GSM4643732_E11.5gonad_TTGGAACTCCTGTACC	0.00711558	0.225294	0.117054	0.011573	0.45572	0.0758416	0.104095	0.00330563
GSM4643732_E11.5gonad_TTGGAACTCGGTTAAC	0.00799086	0.00208017	0.00231236	0.04578	0.0443284	0.0124124	0.124719	0.760377
GSM4643732_E11.5gonad_TTGTAGGAGCAGATCG	0.243252	0.0318417	0.010486	0.0178476	0.0510024	0.0310058	0.105847	0.508718
GSM4643732_E11.5gonad_TTGTAGGCATCGGAAG	0.0450864	0.0109364	0.00445479	0.00304903	0.0165017	0.069194	0.0135431	0.837235
GSM4643732_E11.5gonad_TTGTAGGGTACTTCTT	0.900421	0.0198823	0.00530839	0.0131623	0.0165731	0.00722641	0.0153679	0.0220584
GSM4643732_E11.5gonad_TTTACTGAGACCACGA	0.0938347	0.0290778	0.0349466	0.0149681	0.276327	0.0576734	0.264791	0.228382
GSM4643732_E11.5gonad_TTTACTGAGTTCCACA	0.424757	0.0343042	0.0279252	0.0227126	0.0396761	0.258073	0.0733307	0.11922
GSM4643732_E11.5gonad_TTTACTGCACCAGGTC	0.00160261	0.0959823	0.160139	0.00144146	0.0260593	0.71065	0.00314028	0.000985497
GSM4643732_E11.5gonad_TTTACTGGTATTAGCC	0.0387706	0.0178358	0.0116188	0.00882384	0.186153	0.0476144	0.455416	0.233767
GSM4643732_E11.5gonad_TTTACTGTCAGTACGT	0.00022051	0.000858889	0.0060064	0.000142971	0.0330141	0.937927	0.0217959	3.38546e-05
GSM4643732_E11.5gonad_TTTACTGTCTTGAGGT	0.0105733	0.0402181	0.103778	0.0224293	0.63533	0.0879197	0.0977536	0.00199814
GSM4643732_E11.5gonad_TTTATGCCAGACAAAT	0.944916	0.00945576	0.0013622	0.00371567	0.00404312	0.0310037	0.00120869	0.00429525
GSM4643732_E11.5gonad_TTTATGCTCATCTGCC	0.238752	0.660185	0.00517388	0.000327383	0.00333997	0.0908712	0.000993487	0.000357466
GSM4643732_E11.5gonad_TTTCCTCCATCTATGG	0.00162342	0.0769213	0.502423	0.00179032	0.0371943	0.374988	0.00354356	0.00151539
GSM4643732_E11.5gonad_TTTCCTCGTTACGCGC	0.0185882	0.0100694	0.00503012	0.0358956	0.0288654	0.0749425	0.0392211	0.787388
GSM4643732_E11.5gonad_TTTGCGCCAGCTGTAT	0.0895989	0.109837	0.0797959	0.0397242	0.176462	0.0392446	0.0984244	0.366914
GSM4643732_E11.5gonad_TTTGCGCCATGGTCTA	0.257408	0.00288352	0.00283713	0.00775725	0.0410636	0.331812	0.0105868	0.345651
GSM4643732_E11.5gonad_TTTGCGCGTTGAGGTG	0.0129063	0.00571081	0.00137626	0.00105451	0.31832	0.43685	0.129172	0.0946103
GSM4643732_E11.5gonad_TTTGGTTGTAAGAGGA	0.0589757	0.135693	0.0538565	0.00347555	0.109806	0.574691	0.0501612	0.013341
GSM4643732_E11.5gonad_TTTGGTTGTTACTGAC	0.00175802	0.155823	0.113799	0.00403322	0.489452	0.155634	0.0656553	0.0138448
GSM4643733_E12.5ovary_AAACCTGAGCATGGCA	0.931675	0.0133864	0.0019079	0.0088539	0.00952365	0.00643212	0.00468648	0.0235344
GSM4643733_E12.5ovary_AAACCTGAGTGGCACA	0.00504258	0.518166	0.0873408	0.0112656	0.244675	0.0805887	0.0517684	0.00115296
GSM4643733_E12.5ovary_AAACCTGCAACACCTA	0.00853497	0.0971699	0.058106	0.00277887	0.0261914	0.350523	0.454399	0.00229699
GSM4643733_E12.5ovary_AAACCTGGTAGCGATG	0.00490939	0.00803358	0.00783922	0.00086406	0.0497306	0.214433	0.704018	0.0101722
GSM4643733_E12.5ovary_AAACCTGGTTTGGGCC	0.000100062	0.0307385	0.951445	0.000165661	0.00711749	0.0103368	9.12245e-05	5.33259e-06
GSM4643733_E12.5ovary_AAACGGGCAAACGTGG	0.0016478	0.10906	0.342	0.00262474	0.158803	0.375078	0.00946543	0.00132234
GSM4643733_E12.5ovary_AAACGGGTCGATGAGG	0.000112291	0.0100568	0.022398	4.47056e-05	0.0354423	0.931154	0.000788061	3.97538e-06
GSM4643733_E12.5ovary_AAAGATGCAAGTTCTG	0.0174126	0.420296	0.0218023	0.00844539	0.141963	0.161483	0.222021	0.00657674
GSM4643733_E12.5ovary_AAAGATGCACTTCGAA	0.00109873	0.0180097	0.161886	0.655687	0.121691	0.0349891	0.00557497	0.00106326
GSM4643733_E12.5ovary_AAAGATGCATCAGTCA	0.0249995	0.0613443	0.00196718	5.78057e-05	0.00155378	0.907121	0.00287899	7.70848e-05
GSM4643733_E12.5ovary_AAAGATGGTAGTGAAT	0.392382	0.0174615	0.00667766	0.0286373	0.0190736	0.00540779	0.0345229	0.495837
GSM4643733_E12.5ovary_AAAGATGGTCCCTACT	0.000117136	0.000864617	0.000659741	0.00330087	0.92713	0.0110088	0.0500462	0.00687289
GSM4643733_E12.5ovary_AAAGATGGTCTAGTGT	0.178142	0.124197	0.0218059	0.0001963	0.0140968	0.656407	0.00400435	0.00114938
GSM4643733_E12.5ovary_AAAGCAACAAGGCTCC	0.988661	0.00236049	0.000127656	5.24949e-05	0.000343701	0.00836587	3.19143e-05	5.72898e-05
GSM4643733_E12.5ovary_AAAGCAAGTAATAGCA	0.206512	0.120407	0.109267	0.0517726	0.0798155	0.0684996	0.155748	0.207979
GSM4643733_E12.5ovary_AAAGCAAGTTGCGCAC	4.67482e-05	0.00354719	0.0230215	1.26922e-05	0.00835449	0.963983	0.0010112	2.3639e-05
GSM4643733_E12.5ovary_AAAGCAATCCTCTAGC	0.0236445	0.0343636	0.0341178	0.0798154	0.72128	0.054189	0.028782	0.0238073
GSM4643733_E12.5ovary_AAAGTAGAGAATTCCC	0.00293811	0.0217375	0.18113	0.00713032	0.602124	0.156614	0.0279049	0.00042108
GSM4643733_E12.5ovary_AAAGTAGAGAGGGCTT	0.00128356	0.107402	0.304606	0.0012776	0.0868855	0.49139	0.00642107	0.000734546
GSM4643733_E12.5ovary_AAAGTAGCAAGTCTAC	0.00757048	0.0462675	0.0212316	0.00101782	0.0683692	0.847171	0.0081657	0.000207115
GSM4643733_E12.5ovary_AAAGTAGCACACCGAC	0.00102928	0.0165673	0.251363	0.00125408	0.53587	0.15689	0.0361692	0.000857576
GSM4643733_E12.5ovary_AAAGTAGCACACCGCA	0.140158	0.27198	0.0285337	0.00448232	0.0834953	0.45083	0.0153707	0.00514938
GSM4643733_E12.5ovary_AAAGTAGCACGTCTCT	9.48481e-05	0.00852108	0.906887	0.00940457	0.054423	0.0175614	0.00266868	0.000439288
GSM4643733_E12.5ovary_AAATGCCAGATCACGG	0.00404383	0.154183	0.117968	0.00633196	0.0896597	0.583137	0.0436296	0.0010475
GSM4643733_E12.5ovary_AAATGCCGTAAGTTCC	0.00816241	0.104672	0.18246	0.0139598	0.361907	0.222914	0.0984823	0.00744247
GSM4643733_E12.5ovary_AACACGTCAACCGCCA	0.000452479	0.0115273	0.0535871	0.000633614	0.136743	0.791474	0.00551096	7.14294e-05
GSM4643733_E12.5ovary_AACCATGGTGCCTTGG	0.000299718	0.019641	0.00936916	0.00117826	0.623117	0.0851251	0.261171	9.86343e-05
GSM4643733_E12.5ovary_AACCATGGTTAAGATG	0.0755235	0.0273013	0.0139981	0.0513731	0.0312045	0.040921	0.575914	0.183764
GSM4643733_E12.5ovary_AACCATGTCTAACCGA	4.82676e-05	0.00995172	0.245914	7.34247e-05	0.066091	0.676493	0.00142437	4.68687e-06
GSM4643733_E12.5ovary_AACCGCGCAATAGCAA	0.000136233	0.937661	0.048288	0.000139944	0.00732569	0.00637478	7.05879e-05	3.77248e-06
GSM4643733_E12.5ovary_AACCGCGCACACCGCA	0.00214042	0.0566141	0.0582179	0.00204797	0.310585	0.232964	0.336004	0.00142636
GSM4643733_E12.5ovary_AACCGCGCAGGATCGA	0.0174795	0.107011	0.0869765	0.0264592	0.120673	0.518571	0.119847	0.00298217
GSM4643733_E12.5ovary_AACCGCGTCACAACGT	0.639235	0.0308726	0.00446323	0.00650176	0.0352695	0.275043	0.00682478	0.00179003
GSM4643733_E12.5ovary_AACCGCGTCCTTTCGG	0.291347	0.0235354	0.00911376	0.0292319	0.0348198	0.0179314	0.0400891	0.553932
GSM4643733_E12.5ovary_AACGTTGAGTACGATA	0.00839574	0.237554	0.2099	0.00340449	0.12118	0.377379	0.039163	0.00302248
GSM4643733_E12.5ovary_AACGTTGAGTAGCCGA	0.0010161	0.0108808	0.869604	0.000266153	0.00381493	0.109189	0.0051577	7.14001e-05
GSM4643733_E12.5ovary_AACGTTGAGTGTGAAT	0.618447	0.039835	0.0142367	0.0490037	0.0405586	0.00892151	0.0500936	0.178904
GSM4643733_E12.5ovary_AACGTTGCATCGGAAG	0.000347938	0.0373248	0.219086	0.00370339	0.364915	0.354703	0.0196384	0.000282396
GSM4643733_E12.5ovary_AACGTTGGTAGCACGA	0.00230815	0.141211	0.291867	0.153359	0.369624	0.0358326	0.004577	0.00122126
GSM4643733_E12.5ovary_AACGTTGGTTCTGAAC	0.00754052	0.0399522	0.0240877	0.000700005	0.0180199	0.891154	0.0183713	0.000174429
GSM4643733_E12.5ovary_AACGTTGTCCGCGGTA	0.00878906	0.0247212	0.0729368	0.00401932	0.376257	0.388955	0.00922268	0.115099
GSM4643733_E12.5ovary_AACGTTGTCGCAAACT	0.00274022	0.0334402	0.399511	0.0131112	0.122052	0.15392	0.268304	0.00692157
GSM4643733_E12.5ovary_AACTCAGAGTGTCCAT	0.0110807	0.00375157	0.00613243	0.0048451	0.0159159	0.0175127	0.0202697	0.920492
GSM4643733_E12.5ovary_AACTCAGGTTGGACCC	0.0368374	0.618201	0.0295713	0.00589807	0.0461009	0.244245	0.0151822	0.0039638
GSM4643733_E12.5ovary_AACTCAGTCTGCTGTC	0.0109258	0.501755	0.1111	0.179092	0.0780414	0.106972	0.00921503	0.00289909
GSM4643733_E12.5ovary_AACTCCCAGGGTGTGT	0.0112771	0.024435	0.0198709	0.000903465	0.145604	0.713178	0.0839175	0.000814494
GSM4643733_E12.5ovary_AACTCCCAGTCAAGGC	0.348153	0.474545	0.0186763	0.00385239	0.00853182	0.137074	0.00501153	0.00415601
GSM4643733_E12.5ovary_AACTCCCAGTGGTAAT	0.00668001	0.0119154	0.00965548	0.00588984	0.509727	0.023043	0.41765	0.0154385
GSM4643733_E12.5ovary_AACTCCCCAATGAATG	0.0724739	0.0584351	0.041807	0.0178246	0.111415	0.54183	0.147077	0.00913751
GSM4643733_E12.5ovary_AACTCCCCAGACGTAG	0.000425065	0.00139269	0.00469096	0.000748024	0.565492	0.112188	0.314477	0.000586132
GSM4643733_E12.5ovary_AACTCCCTCCCAACGG	0.00111352	0.0017289	0.00158872	0.000233021	0.053323	0.906611	0.0335563	0.00184549
GSM4643733_E12.5ovary_AACTCCCTCCCAAGTA	7.40883e-05	0.00768846	0.024525	3.14063e-05	0.016085	0.948833	0.00275205	1.1242e-05
GSM4643733_E12.5ovary_AACTCTTAGCTAGGCA	0.00145887	0.0318907	0.0195145	0.00165752	0.34723	0.542709	0.055054	0.000485721
GSM4643733_E12.5ovary_AACTCTTAGGAATTAC	0.000204351	0.00108035	0.0090023	0.00115001	0.121167	0.855381	0.0119913	2.40031e-05
GSM4643733_E12.5ovary_AACTCTTAGGCCCTTG	0.0173517	0.0172147	0.00193812	0.000705884	0.0311206	0.918229	0.0129576	0.000481998
GSM4643733_E12.5ovary_AACTCTTCACGGCGTT	0.870285	0.0243307	0.0090383	0.0251119	0.0223005	0.0311247	0.0060268	0.0117826
GSM4643733_E12.5ovary_AACTCTTCAGGAATGC	0.0780282	0.482557	0.034049	0.0352509	0.0314723	0.0186278	0.0257401	0.294275
GSM4643733_E12.5ovary_AACTCTTCAGGGTTAG	0.935488	0.00887819	0.00247535	0.00418904	0.0203256	0.016933	0.00479409	0.00691698
GSM4643733_E12.5ovary_AACTCTTCAGTGGAGT	0.0601185	0.0106314	0.00400266	0.0267587	0.0641421	0.00897206	0.406687	0.418688
GSM4643733_E12.5ovary_AACTCTTTCGTCGTTC	0.0452938	0.0582859	0.117248	0.113911	0.115353	0.0223214	0.471067	0.0565204
GSM4643733_E12.5ovary_AACTCTTTCTGTTGAG	8.01705e-05	0.00382429	0.145829	0.00204913	0.801661	0.0454004	0.00111696	3.90645e-05
GSM4643733_E12.5ovary_AACTGGTCAAGGTTTC	0.0029671	0.0799185	0.0187322	0.000384711	0.0134816	0.883473	0.00086626	0.000176224
GSM4643733_E12.5ovary_AACTGGTCAGTCAGCC	0.13786	0.337194	0.165476	0.0723885	0.116357	0.106967	0.0552516	0.00850629
GSM4643733_E12.5ovary_AACTGGTGTGAGGGAG	0.93046	0.0316567	0.00267984	0.00329109	0.00672512	0.012384	0.00460288	0.0081998
GSM4643733_E12.5ovary_AACTGGTGTTGATTGC	0.00351568	0.0225347	0.101815	0.00122526	0.225002	0.599541	0.0452718	0.00109462
GSM4643733_E12.5ovary_AACTGGTTCGACGGAA	0.000218696	0.00620112	0.0111133	0.00176074	0.301128	0.222103	0.454385	0.00309036
GSM4643733_E12.5ovary_AACTTTCCACAGCGTC	0.0467404	0.0295967	0.0257558	0.00276292	0.489514	0.297205	0.0978621	0.0105626
GSM4643733_E12.5ovary_AACTTTCCACCTATCC	8.19409e-05	0.011483	0.937137	0.000894815	0.023836	0.0205844	0.00588256	0.000100363
GSM4643733_E12.5ovary_AACTTTCCATGCATGT	0.0502398	0.00939142	0.012738	0.0045475	0.0547809	0.559903	0.284737	0.0236625
GSM4643733_E12.5ovary_AACTTTCCATGTCCTC	0.00166947	0.00861234	0.0201157	0.00268339	0.299097	0.585155	0.0314022	0.0512649
GSM4643733_E12.5ovary_AACTTTCTCTTGTTTG	0.629322	0.0280867	0.0035121	0.00076088	0.0179166	0.305949	0.0101445	0.00430851
GSM4643733_E12.5ovary_AAGACCTCACGGTAAG	0.0774091	0.287735	0.0427006	0.0183099	0.185574	0.235245	0.150578	0.00244803
GSM4643733_E12.5ovary_AAGACCTGTAAATACG	0.938229	0.0374801	0.00297018	0.00064732	0.00411389	0.0157335	0.000649038	0.000177427
GSM4643733_E12.5ovary_AAGACCTGTACTCAAC	0.402442	0.0155793	0.00622784	0.0305148	0.0240997	0.0066083	0.0561002	0.458428
GSM4643733_E12.5ovary_AAGACCTGTGATAAAC	0.0417662	0.0220044	0.0180347	0.011243	0.0308502	0.0519182	0.0601015	0.764082
GSM4643733_E12.5ovary_AAGCCGCAGTTATCGC	0.000944084	0.00495928	0.0117632	0.000194622	0.469113	0.379007	0.133758	0.000261088
GSM4643733_E12.5ovary_AAGCCGCGTTCCATGA	0.689654	0.0810324	0.0184734	0.00401948	0.0111712	0.176175	0.0186325	0.000842522
GSM4643733_E12.5ovary_AAGCCGCTCTACCAGA	0.000783939	0.153275	0.0798901	0.000224589	0.0798483	0.632657	0.0531999	0.000121167
GSM4643733_E12.5ovary_AAGCCGCTCTATCCTA	0.00144104	0.00383458	0.00550612	0.000249677	0.0549829	0.932868	0.00111215	5.67943e-06
GSM4643733_E12.5ovary_AAGGAGCAGTATCTCG	0.383858	0.0872567	0.183206	0.0389796	0.098145	0.0670969	0.0476882	0.0937695
GSM4643733_E12.5ovary_AAGGAGCAGTGAAGTT	0.00109206	0.000648044	0.00096977	0.00195878	0.0884001	0.00918183	0.0212309	0.876519
GSM4643733_E12.5ovary_AAGGAGCGTCAGTGGA	0.00255028	8.08411e-05	8.5559e-05	1.10435e-06	0.000174867	0.99672	0.000250366	0.000137437
GSM4643733_E12.5ovary_AAGGAGCTCCCTTGTG	0.00104232	0.0604965	0.555767	0.00285533	0.232474	0.109061	0.0378081	0.000495912
GSM4643733_E12.5ovary_AAGGAGCTCGATAGAA	0.00130402	0.0498354	0.154934	0.0163527	0.557409	0.209451	0.00984327	0.000870079
GSM4643733_E12.5ovary_AAGGCAGAGAAGCCCA	0.014112	0.182583	0.0424956	0.00769478	0.162076	0.484497	0.101853	0.00468952
GSM4643733_E12.5ovary_AAGGCAGAGCAACGGT	7.04986e-05	0.00189172	0.00417092	1.88842e-05	0.00618145	0.987389	0.000273868	3.94337e-06
GSM4643733_E12.5ovary_AAGGCAGAGCGTGAGT	0.000771182	0.133896	0.441954	0.00772401	0.356538	0.0561406	0.00222159	0.000754829
GSM4643733_E12.5ovary_AAGGCAGAGTTAGCGG	0.000905089	0.0963785	0.0863091	0.00133745	0.0461192	0.763718	0.00467095	0.000561524
GSM4643733_E12.5ovary_AAGGCAGAGTTGAGAT	0.150061	0.0945592	0.040642	0.0181202	0.098252	0.020306	0.147046	0.431014
GSM4643733_E12.5ovary_AAGGCAGCACACCGCA	0.00430218	0.187678	0.0614703	0.0070378	0.423076	0.206598	0.107186	0.00265175
GSM4643733_E12.5ovary_AAGGCAGCAGCTATTG	0.015037	0.00579418	0.00730166	0.00424638	0.915316	0.0114214	0.031323	0.00956052
GSM4643733_E12.5ovary_AAGGCAGGTATTACCG	0.673705	0.196645	0.0358522	0.00485732	0.0252022	0.0488117	0.0138098	0.00111684
GSM4643733_E12.5ovary_AAGGTTCAGAGACTTA	0.00489095	0.249859	0.0197455	0.000893234	0.0686126	0.650332	0.0052505	0.000416371
GSM4643733_E12.5ovary_AAGGTTCAGGGAGTAA	0.0124634	0.0934836	0.122848	0.00612066	0.221329	0.452848	0.0868461	0.00406093
GSM4643733_E12.5ovary_AAGGTTCAGTGAACGC	0.0165743	0.0269671	0.679562	0.0139404	0.083895	0.0420701	0.0904189	0.0465726
GSM4643733_E12.5ovary_AAGGTTCGTGACCAAG	0.113424	0.173914	0.063088	0.00519137	0.0708575	0.530728	0.0153439	0.0274523
GSM4643733_E12.5ovary_AAGGTTCGTGTGTGCC	0.305133	0.0139189	0.00603475	0.0187917	0.0219976	0.00639958	0.0228041	0.60492
GSM4643733_E12.5ovary_AAGTCTGCAAGACACG	0.103321	0.0166611	0.00540434	0.00716647	0.0349062	0.403545	0.0208396	0.408156
GSM4643733_E12.5ovary_AAGTCTGGTAGCTGCC	0.00231483	0.00944486	0.370233	0.00420588	0.324341	0.26026	0.0257528	0.00344777
GSM4643733_E12.5ovary_AAGTCTGGTTTGGCGC	0.00179603	0.195199	0.154969	0.0141281	0.373505	0.234895	0.024085	0.00142294
GSM4643733_E12.5ovary_AATCCAGGTAGCTTGT	0.000775298	0.03943	0.0978001	0.000371865	0.0970039	0.758292	0.00614623	0.000181204
GSM4643733_E12.5ovary_AATCGGTAGCACAGGT	0.964806	0.0168643	0.000488056	0.000212316	0.004083	0.0129323	0.000476526	0.000137609
GSM4643733_E12.5ovary_AATCGGTAGGGATCTG	0.0176401	0.00738033	0.00347244	0.000159445	0.00513712	0.961411	0.00410785	0.000691882
GSM4643733_E12.5ovary_AATCGGTAGGGTCGAT	0.490295	0.391839	0.0285183	0.00219209	0.0131447	0.0660664	0.00656096	0.00138279
GSM4643733_E12.5ovary_AATCGGTAGTCATCCA	0.000331155	0.00571177	0.028618	0.000562242	0.813868	0.0518959	0.0974802	0.00153293
GSM4643733_E12.5ovary_AATCGGTAGTTATCGC	0.155373	0.270111	0.0543141	0.004375	0.068452	0.412131	0.033089	0.00215492
GSM4643733_E12.5ovary_AATCGGTCACCGATAT	0.0397367	0.858032	0.03782	0.00885462	0.0240795	0.0250039	0.00514371	0.00132985
GSM4643733_E12.5ovary_AATCGGTGTTTCGCTC	0.0055802	0.00145324	0.00383471	0.00743622	0.00531722	0.0169745	0.00411033	0.955294
GSM4643733_E12.5ovary_ACACCAACACAAGTAA	0.0111436	0.0050918	0.00730791	0.0149211	0.0131579	0.0532246	0.0136684	0.881485
GSM4643733_E12.5ovary_ACACCAAGTCGGCTCA	0.134134	0.0991865	0.0541448	0.0115284	0.0937229	0.394816	0.0696985	0.142769
GSM4643733_E12.5ovary_ACACCAATCAAGCCTA	0.214487	0.0372584	0.00214566	9.57745e-05	0.000436132	0.745458	0.000107342	1.13732e-05
GSM4643733_E12.5ovary_ACACCCTAGCGATATA	0.00309264	0.0117631	0.265631	0.0453198	0.425507	0.0611673	0.184038	0.00348084
GSM4643733_E12.5ovary_ACACCCTCAAATCCGT	0.00432284	0.0296378	0.0223202	0.000334408	0.0510589	0.823886	0.0682303	0.000209459
GSM4643733_E12.5ovary_ACACCCTCACGACGAA	0.000513271	7.26997e-05	0.00020216	7.67665e-06	9.17674e-05	0.99885	9.40362e-05	0.000168387
GSM4643733_E12.5ovary_ACACCCTCACGTGAGA	0.0221982	0.0806439	0.136968	0.0457026	0.393015	0.171276	0.106139	0.0440569
GSM4643733_E12.5ovary_ACACCCTCAGGAATGC	0.815739	0.026965	0.0100302	0.0222278	0.0571958	0.0159217	0.017587	0.0343337
GSM4643733_E12.5ovary_ACACCCTGTACCATCA	0.00246328	0.804015	0.0106676	2.72124e-05	0.00402668	0.178569	0.000225466	5.22622e-06
GSM4643733_E12.5ovary_ACACCCTTCCTCTAGC	0.0209953	0.256784	0.0755873	0.0370537	0.508158	0.0809558	0.0187313	0.00173557
GSM4643733_E12.5ovary_ACACCGGAGCCAACAG	0.051987	0.0704202	0.1553	0.0442022	0.32632	0.118069	0.215183	0.0185191
GSM4643733_E12.5ovary_ACACCGGCATGTCGAT	0.00859282	0.11232	0.11872	0.0181	0.197549	0.283804	0.254766	0.00614638
GSM4643733_E12.5ovary_ACACCGGTCACATAGC	0.000776674	0.0540515	0.581628	0.00132539	0.0601862	0.299513	0.00174024	0.00077897
GSM4643733_E12.5ovary_ACACCGGTCCAAGTAC	0.00340642	0.439951	0.122	0.00505032	0.0771796	0.339046	0.0110442	0.00232298
GSM4643733_E12.5ovary_ACACCGGTCTGGCGAC	0.00321916	0.139116	0.0273049	0.00319948	0.0980487	0.590868	0.135258	0.00298562
GSM4643733_E12.5ovary_ACACTGAAGATGCCTT	0.00440308	0.025316	0.0321658	0.00300413	0.189202	0.734223	0.0107095	0.000976425
GSM4643733_E12.5ovary_ACACTGAGTACCTACA	0.000559585	0.00728626	0.00916705	0.000785527	0.317808	0.0739087	0.59008	0.000404505
GSM4643733_E12.5ovary_ACACTGAGTATGGTTC	0.019256	0.43416	0.274065	0.0105478	0.146085	0.0419186	0.0683837	0.00558407
GSM4643733_E12.5ovary_ACACTGAGTCATGCCG	0.177382	0.101716	0.0177518	0.00790447	0.0311008	0.395895	0.0247646	0.243485
GSM4643733_E12.5ovary_ACAGCCGGTGGTCCGT	0.0177158	0.0549838	0.124617	0.024918	0.201209	0.031497	0.494563	0.0504959
GSM4643733_E12.5ovary_ACAGCTAAGCAGGCTA	0.000123158	0.00733421	0.0579018	0.000224196	0.435814	0.479755	0.0184112	0.000436436
GSM4643733_E12.5ovary_ACAGCTAAGGATGGAA	0.00538482	0.0365601	0.019718	0.00543718	0.82998	0.0635902	0.0331087	0.00622062
GSM4643733_E12.5ovary_ACAGCTAAGGTGCTTT	0.00273544	0.0223291	0.0116322	0.0037516	0.139133	0.044705	0.767335	0.00837829
GSM4643733_E12.5ovary_ACAGCTAAGTCATGCT	0.6891	0.0180384	0.00682164	0.00428053	0.0161298	0.19286	0.0210932	0.0516763
GSM4643733_E12.5ovary_ACAGCTACAAAGTGCG	0.00313108	0.0641123	0.086509	0.00401629	0.0792011	0.461628	0.298642	0.00276055
GSM4643733_E12.5ovary_ACAGCTACAGACAAAT	0.00941413	0.434996	0.268442	0.0092189	0.190107	0.0538833	0.0237697	0.0101695
GSM4643733_E12.5ovary_ACAGCTAGTTCTGAAC	0.0066266	0.0539901	0.0803504	0.00609946	0.152735	0.450989	0.243549	0.00565981
GSM4643733_E12.5ovary_ACAGCTATCATGCAAC	0.000290895	0.00830796	0.869402	0.00114059	0.0264979	0.0583965	0.0353447	0.00061945
GSM4643733_E12.5ovary_ACAGCTATCTACTCAT	0.146597	0.547766	0.0281211	0.0190621	0.0659139	0.174584	0.0130387	0.00491722
GSM4643733_E12.5ovary_ACATACGCAGTAACGG	0.0535754	0.230971	0.019248	0.00663423	0.276993	0.145411	0.262041	0.00512639
GSM4643733_E12.5ovary_ACATACGGTGAGGGAG	0.0510181	0.0841623	0.19417	0.0349898	0.321741	0.0884046	0.169242	0.0562716
GSM4643733_E12.5ovary_ACATACGGTTTGCATG	0.0634162	0.00231134	0.00145652	0.00077436	0.00804201	0.63025	0.00656485	0.287185
GSM4643733_E12.5ovary_ACATACGTCCCTTGCA	1.31284e-05	0.00128018	0.00847861	0.00440143	0.933467	0.051115	0.00123654	8.21997e-06
GSM4643733_E12.5ovary_ACATACGTCCCTTGTG	0.0515378	0.0162132	0.00393026	0.020839	0.0246552	0.0217368	0.00955525	0.851533
GSM4643733_E12.5ovary_ACATACGTCTCCCTGA	0.0781552	0.733125	0.0164423	0.00315615	0.0392677	0.105857	0.0180391	0.00595787
GSM4643733_E12.5ovary_ACATCAGAGGACATTA	0.000102373	0.0547017	0.0372105	0.000865698	0.820014	0.030049	0.0569881	6.89421e-05
GSM4643733_E12.5ovary_ACATCAGAGTTGTCGT	8.71568e-05	0.0169097	0.00936233	1.3018e-05	0.00134365	0.97183	0.000453942	2.41201e-07
GSM4643733_E12.5ovary_ACATCAGCACTGTGTA	0.141602	0.710036	0.0390413	0.0025818	0.00706393	0.0902895	0.00743801	0.00194799
GSM4643733_E12.5ovary_ACATCAGCAGGCGATA	0.0163105	0.31467	0.041206	0.0188931	0.12199	0.120019	0.339893	0.0270184
GSM4643733_E12.5ovary_ACATCAGGTCCTCTTG	0.000165783	0.00196532	0.0034774	0.000657023	0.551115	0.367576	0.0570417	0.018002
GSM4643733_E12.5ovary_ACATCAGGTTCCCGAG	0.0154748	0.175082	0.0354308	0.0125574	0.568754	0.155846	0.0345383	0.00231698
GSM4643733_E12.5ovary_ACATCAGTCGGACAAG	0.167636	0.315332	0.0792163	0.0260322	0.0509221	0.349875	0.00803895	0.00294773
GSM4643733_E12.5ovary_ACATGGTAGATCCCAT	0.000948275	0.111828	0.710276	0.00146616	0.0475446	0.125862	0.00137319	0.000702022
GSM4643733_E12.5ovary_ACATGGTAGTGCTGCC	0.00433922	0.409168	0.0713132	0.00441231	0.0292588	0.360005	0.11846	0.00304289
GSM4643733_E12.5ovary_ACATGGTAGTTTAGGA	0.366692	0.0188183	0.00799291	0.0290529	0.0204284	0.0061995	0.0287529	0.522063
GSM4643733_E12.5ovary_ACATGGTCACATGACT	0.229632	0.0928868	0.0731538	0.00954628	0.317655	0.20694	0.0341327	0.0360539
GSM4643733_E12.5ovary_ACATGGTCATGTCCTC	0.0129714	0.0777336	0.110554	0.0577522	0.393675	0.316617	0.0280761	0.0026219
GSM4643733_E12.5ovary_ACATGGTGTCTAGAGG	0.399522	0.0173255	0.00703462	0.0255	0.017393	0.00604733	0.0279408	0.499237
GSM4643733_E12.5ovary_ACATGGTGTGCTAGCC	0.00901042	0.146095	0.298126	0.050599	0.31307	0.0948254	0.0808305	0.00744389
GSM4643733_E12.5ovary_ACATGGTTCTACTATC	0.0110209	0.979937	0.00227352	1.68615e-05	0.000153952	0.00657189	2.28692e-05	3.31014e-06
GSM4643733_E12.5ovary_ACCAGTAAGCTAGTCT	0.0364847	0.0571776	0.380447	0.034569	0.106805	0.173607	0.104002	0.106908
GSM4643733_E12.5ovary_ACCAGTAAGTGCGTGA	0.00199712	0.0642461	0.450104	0.017333	0.256002	0.0132521	0.179113	0.0179531
GSM4643733_E12.5ovary_ACCAGTACAACGATGG	0.000329743	0.00920115	0.0131529	0.0933538	0.862083	0.0140944	0.0076719	0.000112591
GSM4643733_E12.5ovary_ACCAGTACAGGATTGG	0.00186973	0.327927	0.158922	0.00135959	0.0434901	0.399083	0.0663263	0.00102198
GSM4643733_E12.5ovary_ACCAGTAGTACAGTTC	0.1832	0.0881294	0.0130864	0.097938	0.289802	0.170769	0.10205	0.0550255
GSM4643733_E12.5ovary_ACCAGTAGTCAGAATA	0.0195794	0.113812	0.0885003	0.00307014	0.05547	0.70274	0.0145613	0.00226669
GSM4643733_E12.5ovary_ACCAGTATCTTACCGC	0.0156922	0.0133896	0.0279461	0.00981973	0.233996	0.0341701	0.648708	0.0162777
GSM4643733_E12.5ovary_ACCCACTGTTGGTGGA	0.000730693	0.00388169	0.0461093	0.000849548	0.469047	0.400807	0.0777975	0.000776793
GSM4643733_E12.5ovary_ACCCACTTCATCACCC	0.0252437	0.0882019	0.163286	0.0217081	0.241182	0.152305	0.3043	0.00377442
GSM4643733_E12.5ovary_ACCGTAAAGCTAGTGG	0.971107	0.00767847	0.000675788	0.00210793	0.00228888	0.0140146	0.00100241	0.00112468
GSM4643733_E12.5ovary_ACCGTAAAGTACGATA	0.00557964	0.131031	0.114317	0.0717859	0.252167	0.0703495	0.34401	0.0107595
GSM4643733_E12.5ovary_ACCGTAACAAACGCGA	0.826145	0.0306108	0.00631221	0.00606379	0.0189035	0.0827618	0.00881412	0.0203884
GSM4643733_E12.5ovary_ACCGTAAGTATTAGCC	0.00781032	0.123979	0.279859	0.101834	0.266789	0.0854281	0.113884	0.0204171
GSM4643733_E12.5ovary_ACCGTAAGTCAACTGT	0.124148	0.0263373	0.0256253	0.0201321	0.274764	0.264563	0.128813	0.135618
GSM4643733_E12.5ovary_ACCGTAATCAATACCG	0.00477179	0.200009	0.0600707	0.00437807	0.341663	0.328544	0.0575912	0.00297177
GSM4643733_E12.5ovary_ACCGTAATCGTCACGG	0.549259	0.00534781	0.000498548	0.00120654	0.00244315	0.43662	0.00143887	0.00318559
GSM4643733_E12.5ovary_ACCTTTAAGAATCTCC	0.0037667	0.023463	0.0666971	0.000358184	0.0366084	0.864923	0.00405133	0.00013268
GSM4643733_E12.5ovary_ACCTTTACAGGTGCCT	0.00177647	0.536582	0.0355015	0.000577676	0.0401157	0.366873	0.0182949	0.00027809
GSM4643733_E12.5ovary_ACCTTTATCGGCGCAT	0.000222415	0.00328836	0.00276746	0.000140722	0.930139	0.0441767	0.0190443	0.000221203
GSM4643733_E12.5ovary_ACGAGCCCAATAACGA	0.000467643	0.00468369	0.23271	0.00124951	0.4215	0.31999	0.0190205	0.000378963
GSM4643733_E12.5ovary_ACGAGCCCACCACCAG	0.00814123	0.0922633	0.021654	0.0154516	0.726634	0.0756337	0.0596296	0.000592225
GSM4643733_E12.5ovary_ACGAGCCTCTCGTATT	0.0796219	0.067723	0.0291387	0.00420387	0.0557748	0.71441	0.0470908	0.00203743
GSM4643733_E12.5ovary_ACGAGCCTCTTGCATT	0.00233872	0.169347	0.141094	0.0119895	0.246183	0.387255	0.0415105	0.000281657
GSM4643733_E12.5ovary_ACGAGGACAGATGGCA	0.00109026	0.00627591	0.0072826	0.00109034	0.0609897	0.0900899	0.831804	0.00137686
GSM4643733_E12.5ovary_ACGAGGACATTAGGCT	0.517064	0.159978	0.0504581	0.120626	0.0135098	0.120678	0.00848883	0.00919725
GSM4643733_E12.5ovary_ACGAGGAGTCCCTACT	0.000516097	0.0129468	0.0515117	0.00652739	0.783387	0.0413986	0.103319	0.000393279
GSM4643733_E12.5ovary_ACGAGGATCAGGATCT	0.968097	0.0193553	0.000794517	0.00166767	0.00405854	0.00166416	0.00113924	0.00322313
GSM4643733_E12.5ovary_ACGATACAGTGGTCCC	0.000162252	0.905102	0.0781934	4.32377e-05	0.00466801	0.01087	0.000956797	4.26219e-06
GSM4643733_E12.5ovary_ACGATACGTTAGATGA	0.000104713	0.000689237	0.000247949	4.28014e-06	0.0115611	0.00549134	0.981895	5.8727e-06
GSM4643733_E12.5ovary_ACGATACTCACTCTTA	0.0386111	0.00946793	0.00620048	0.00399077	0.312861	0.536641	0.072065	0.0201625
GSM4643733_E12.5ovary_ACGATACTCCTAAGTG	0.000434731	0.0296837	0.0953286	0.00106968	0.179269	0.66069	0.0329895	0.000534544
GSM4643733_E12.5ovary_ACGATGTAGTGTCCCG	0.000340096	0.00900061	0.0244026	0.00987218	0.0799597	0.723932	0.15188	0.000612021
GSM4643733_E12.5ovary_ACGATGTCAGCTCCGA	0.346224	0.0228712	0.00860323	0.0398027	0.0273094	0.00613262	0.034316	0.514741
GSM4643733_E12.5ovary_ACGATGTCAGCTGTAT	0.00176697	0.0501024	0.144858	0.00279318	0.33563	0.129165	0.333902	0.00178316
GSM4643733_E12.5ovary_ACGATGTCATTGGTAC	0.00800629	0.000252771	0.000573171	9.35845e-06	0.00169593	0.98921	0.000243565	8.92121e-06
GSM4643733_E12.5ovary_ACGATGTGTTACCGAT	0.00035856	0.0366234	0.0391452	0.00104884	0.585905	0.293448	0.0432064	0.00026462
GSM4643733_E12.5ovary_ACGCAGCAGCGCCTTG	0.174834	0.014369	0.00792259	0.0209558	0.0316393	0.00808958	0.105493	0.636697
GSM4643733_E12.5ovary_ACGCAGCCACTTACGA	0.683572	0.0135435	0.00423237	0.0117957	0.0289441	0.0205795	0.0206614	0.216671
GSM4643733_E12.5ovary_ACGCAGCGTCAATGTC	0.0298552	0.139876	0.186564	0.0671043	0.30193	0.0577227	0.20544	0.0115072
GSM4643733_E12.5ovary_ACGCCAGAGCTAAACA	0.454911	0.0161254	0.00676013	0.022551	0.0255807	0.00637431	0.0367127	0.430985
GSM4643733_E12.5ovary_ACGCCAGAGCTACCGC	0.000322907	0.00373576	0.00706879	0.000832722	0.166932	0.618488	0.201907	0.000713331
GSM4643733_E12.5ovary_ACGCCAGCAAAGCAAT	0.00544152	0.452398	0.308826	0.014995	0.137664	0.0696131	0.00873781	0.00232404
GSM4643733_E12.5ovary_ACGCCAGCATGTTGAC	0.00761227	0.0113747	0.00917514	0.031247	0.252157	0.108757	0.0644484	0.515228
GSM4643733_E12.5ovary_ACGCCAGGTATTCTCT	0.000106118	0.0015041	0.00730737	0.000666676	0.18029	0.79526	0.0141217	0.000744335
GSM4643733_E12.5ovary_ACGCCAGGTGTTTGTG	0.4182	0.0362234	0.0171301	0.143779	0.16974	0.0652375	0.0469173	0.102773
GSM4643733_E12.5ovary_ACGCCAGGTTGATTGC	0.156534	0.0191706	0.0183085	0.00857355	0.0577433	0.0542906	0.256687	0.428693
GSM4643733_E12.5ovary_ACGCCAGTCAAGCCTA	0.0276677	0.08762	0.0822467	0.00452551	0.297769	0.126241	0.344222	0.0297084
GSM4643733_E12.5ovary_ACGCCAGTCTGGTGTA	0.390904	0.128812	0.100511	0.0182914	0.0399118	0.241628	0.0722851	0.00765697
GSM4643733_E12.5ovary_ACGCCGAAGCGTGTCC	0.0061054	0.0724789	0.0531483	0.00337686	0.156256	0.579266	0.125303	0.00406574
GSM4643733_E12.5ovary_ACGCCGACAATTCCTT	2.20538e-05	3.1711e-05	9.56769e-06	2.91329e-06	0.000741472	0.00409977	0.99509	2.60483e-06
GSM4643733_E12.5ovary_ACGCCGACACTTCTGC	0.00283913	0.121551	0.263891	0.00896155	0.126251	0.426206	0.0388925	0.0114085
GSM4643733_E12.5ovary_ACGCCGACATGTCCTC	0.00509477	0.351642	0.00747768	0.0031921	0.0168277	0.583276	0.0322423	0.000247488
GSM4643733_E12.5ovary_ACGCCGATCGTGACAT	0.87033	0.0471812	0.00359261	0.00547648	0.00407641	0.0607865	0.00393244	0.0046244
GSM4643733_E12.5ovary_ACGCCGATCTTGTATC	0.265456	0.193614	0.106512	0.0164123	0.0895409	0.257729	0.0450667	0.0256684
GSM4643733_E12.5ovary_ACGGAGAAGAGCTATA	0.0499904	0.0212631	0.0126512	0.00336884	0.042654	0.849216	0.00732175	0.0135347
GSM4643733_E12.5ovary_ACGGAGACAGACGCTC	0.649382	0.0720948	0.0215264	0.0667421	0.0649212	0.0325337	0.032049	0.0607505
GSM4643733_E12.5ovary_ACGGAGACAGGTGGAT	0.00408018	0.0177223	0.0321755	0.00130387	0.087562	0.675083	0.179111	0.00296217
GSM4643733_E12.5ovary_ACGGAGAGTGCCTTGG	0.319485	0.212154	0.0456044	0.00441265	0.0407472	0.192923	0.146313	0.038362
GSM4643733_E12.5ovary_ACGGAGAGTTGAACTC	0.00100975	0.0218635	0.0191872	0.00107829	0.588272	0.141158	0.187633	0.039798
GSM4643733_E12.5ovary_ACGGAGATCAACACTG	0.000218737	0.0122574	0.0494844	0.00110797	0.764223	0.131712	0.0396196	0.00137654
GSM4643733_E12.5ovary_ACGGAGATCCAATGGT	0.000863089	0.041035	0.0414618	0.000891591	0.202719	0.667556	0.0448982	0.000575355
GSM4643733_E12.5ovary_ACGGCCAGTAAAGGAG	0.714042	0.0523036	0.0156012	0.020313	0.0242989	0.00930574	0.0347566	0.129379
GSM4643733_E12.5ovary_ACGGCCATCCTCCTAG	0.004558	0.0651432	0.0566256	0.00848164	0.546321	0.238794	0.0773635	0.00271263
GSM4643733_E12.5ovary_ACGGCCATCGTCCGTT	0.00101236	0.0300279	0.113819	0.000420159	0.248974	0.602457	0.00308754	0.000201391
GSM4643733_E12.5ovary_ACGGCCATCGTTGCCT	0.278831	0.0151899	0.00592636	0.0247269	0.0267582	0.00558705	0.0813356	0.561645
GSM4643733_E12.5ovary_ACGGGCTAGGAACTGC	0.0117332	0.124092	0.0628077	0.00173149	0.697844	0.0921888	0.00901647	0.000586383
GSM4643733_E12.5ovary_ACGGGCTAGGATCGCA	0.0134987	0.0661698	0.198887	0.0245117	0.279032	0.122106	0.270151	0.0256432
GSM4643733_E12.5ovary_ACGGGCTCAAAGAATC	0.0569896	0.0473532	0.135848	0.357412	0.0636443	0.055728	0.122211	0.160814
GSM4643733_E12.5ovary_ACGGGCTCAACGATGG	5.63539e-05	0.00303335	0.021067	6.37239e-05	0.376388	0.596734	0.00262457	3.29406e-05
GSM4643733_E12.5ovary_ACGGGCTGTGTTTGGT	0.979961	0.00464283	0.000174518	3.79452e-05	0.000291614	0.0147198	9.4698e-05	7.75437e-05
GSM4643733_E12.5ovary_ACGGGCTTCAAGGCTT	0.0221547	0.129774	0.00984992	0.000679905	0.0622	0.768424	0.00627174	0.000646017
GSM4643733_E12.5ovary_ACGGGCTTCGAGAACG	0.0029386	0.0339977	0.126503	0.0355005	0.610618	0.111998	0.0690624	0.00938224
GSM4643733_E12.5ovary_ACGGGCTTCGGCGGTT	0.000265307	0.0224481	0.0174374	9.35405e-05	0.00611158	0.934411	0.0192041	2.87998e-05
GSM4643733_E12.5ovary_ACGGGCTTCTTAACCT	0.734208	0.0200222	0.0032077	0.00747668	0.0210388	0.00842052	0.0571923	0.148434
GSM4643733_E12.5ovary_ACGGGTCCAACGATCT	0.000749021	0.0181005	0.0563608	0.00320208	0.175067	0.678657	0.0673044	0.000559531
GSM4643733_E12.5ovary_ACGGGTCGTGGTCTCG	6.03498e-05	0.017588	0.780987	0.000113569	0.0410598	0.159589	0.000555737	4.68357e-05
GSM4643733_E12.5ovary_ACGGGTCTCGCTGATA	0.0757039	0.0137996	0.0103213	0.0221902	0.0525992	0.00708639	0.0427284	0.775571
GSM4643733_E12.5ovary_ACGTCAACACGTAAGG	0.000174915	0.00102723	0.0289445	0.000454818	0.615011	0.157558	0.196679	0.000151094
GSM4643733_E12.5ovary_ACGTCAACATTCCTCG	0.000110418	0.0300053	0.0618782	0.000982434	0.0408287	0.829843	0.0363004	5.11298e-05
GSM4643733_E12.5ovary_ACGTCAAGTACTTAGC	0.00650643	0.057281	0.0638981	0.00332385	0.0841909	0.767698	0.0159813	0.00112089
GSM4643733_E12.5ovary_ACGTCAAGTAGCTCCG	0.910092	0.0238809	0.00643118	0.0131901	0.00740473	0.018736	0.00799841	0.0122663
GSM4643733_E12.5ovary_ACTATCTCATGCTAGT	0.140485	0.0889764	0.128198	0.0159332	0.271023	0.158418	0.171072	0.0258929
GSM4643733_E12.5ovary_ACTATCTTCAGAGACG	0.000112515	0.00154548	0.000509629	4.33183e-06	0.00172328	0.99564	0.000381855	8.25777e-05
GSM4643733_E12.5ovary_ACTGAACGTAATTGGA	0.000243138	0.0174098	0.0493292	0.000100119	0.0836197	0.846586	0.00243949	0.000272824
GSM4643733_E12.5ovary_ACTGAACGTCCGACGT	0.0570743	0.727272	0.0180418	0.0119915	0.0767305	0.0991209	0.00789791	0.00187131
GSM4643733_E12.5ovary_ACTGAACGTCTAGGTT	0.00164969	0.037	0.00592346	0.000697612	0.839534	0.0510761	0.0640172	0.000102409
GSM4643733_E12.5ovary_ACTGAGTAGAAACCGC	0.0458665	0.911046	0.00559046	0.000128449	0.0190835	0.0177677	0.000407619	0.000109914
GSM4643733_E12.5ovary_ACTGAGTCAAGCGCTC	0.95806	0.0150712	0.00040107	0.000246781	0.00575193	0.0173144	0.00187594	0.00127895
GSM4643733_E12.5ovary_ACTGAGTCAATCTGCA	0.0172432	0.00960036	0.00550971	0.00904835	0.0170867	0.00369242	0.0174547	0.920365
GSM4643733_E12.5ovary_ACTGAGTCACACAGAG	0.00173207	0.0154647	0.0279693	0.00133027	0.770073	0.159373	0.0215667	0.00249134
GSM4643733_E12.5ovary_ACTGAGTCATATGGTC	0.324942	0.0484488	0.0329898	0.0290475	0.138888	0.111313	0.232595	0.081776
GSM4643733_E12.5ovary_ACTGATGAGCAGATCG	0.656146	0.0439766	0.00924036	0.00372432	0.141725	0.0803638	0.0300059	0.0348185
GSM4643733_E12.5ovary_ACTGATGCAACTGCTA	0.767022	0.0882033	0.0170405	0.0173632	0.0201477	0.0151119	0.0226056	0.0525057
GSM4643733_E12.5ovary_ACTGATGCATTCTCAT	0.0190013	0.0802433	0.0576379	0.0326197	0.131549	0.52751	0.064953	0.0864852
GSM4643733_E12.5ovary_ACTGATGTCGATGAGG	0.00629246	0.165592	0.161462	0.00362715	0.0992111	0.46894	0.0914131	0.0034625
GSM4643733_E12.5ovary_ACTGATGTCTTGCCGT	0.000877484	0.0226426	0.0179982	0.00309988	0.41295	0.46393	0.0783428	0.000158998
GSM4643733_E12.5ovary_ACTGCTCCACACCGCA	0.000583452	0.00204574	0.0163023	0.000158419	0.708222	0.249305	0.021872	0.00151037
GSM4643733_E12.5ovary_ACTGCTCCACGGTGTC	3.11376e-05	0.0164592	0.0184585	0.000400866	0.953068	0.00921088	0.0023515	2.02516e-05
GSM4643733_E12.5ovary_ACTGCTCTCCGCAGTG	0.00451222	0.308887	0.0957218	0.000868845	0.19678	0.380513	0.0123308	0.000386238
GSM4643733_E12.5ovary_ACTGTCCAGAGACTTA	0.0191959	0.0153851	0.00170827	0.00691386	0.0341045	0.00784333	0.909811	0.00503809
GSM4643733_E12.5ovary_ACTGTCCAGGGAACGG	0.0379459	0.00481282	0.0015474	0.00450259	0.0283992	0.00639523	0.868999	0.0473976
GSM4643733_E12.5ovary_ACTGTCCCAACAACCT	0.0166632	0.072934	0.0081087	0.000170884	0.00554785	0.887587	0.00181017	0.00717835
GSM4643733_E12.5ovary_ACTTACTGTACCTACA	0.0240071	0.00358038	0.00105709	0.001706	0.0267593	0.00266753	0.00498905	0.935234
GSM4643733_E12.5ovary_ACTTGTTAGCGATGAC	0.00185483	0.106393	0.134005	0.00124011	0.311679	0.433885	0.0105573	0.000386082
GSM4643733_E12.5ovary_ACTTGTTAGCGGCTTC	0.000645427	0.00415787	0.0547617	0.00188272	0.641508	0.117359	0.177919	0.00176643
GSM4643733_E12.5ovary_ACTTGTTAGGGTTTCT	1.65194e-05	0.000226492	0.00984499	0.000830521	0.978893	0.00824884	0.00193835	1.61411e-06
GSM4643733_E12.5ovary_ACTTGTTGTCACTGGC	0.00256722	0.0705838	0.103749	0.0034015	0.257097	0.444833	0.115956	0.00181218
GSM4643733_E12.5ovary_ACTTGTTGTCGCTTCT	0.82364	0.020363	0.00386593	0.0139843	0.0304002	0.00827903	0.0225406	0.0769266
GSM4643733_E12.5ovary_ACTTGTTGTGAAATCA	0.841115	0.0379425	0.0077637	0.00528664	0.0312234	0.0496948	0.0130676	0.0139062
GSM4643733_E12.5ovary_ACTTTCAAGGGTGTTG	0.00469822	0.105417	0.0572637	0.0197458	0.343768	0.200779	0.230603	0.0377261
GSM4643733_E12.5ovary_ACTTTCACACAGGAGT	0.00144361	0.00319622	0.00383309	0.0151301	0.263073	0.0369516	0.165311	0.511061
GSM4643733_E12.5ovary_ACTTTCACACTAAGTC	0.851375	0.0669208	0.00330431	0.00065334	0.000929205	0.0749107	0.00089498	0.00101222
GSM4643733_E12.5ovary_ACTTTCACAGACTCGC	0.00144436	0.0266005	0.157807	0.00154256	0.142268	0.59833	0.0715675	0.000440805
GSM4643733_E12.5ovary_ACTTTCACAGTAACGG	0.78625	0.0129529	0.00370147	0.0183368	0.0363491	0.00679605	0.0281448	0.107469
GSM4643733_E12.5ovary_ACTTTCATCATGTCTT	0.541272	0.084084	0.0105716	0.00926601	0.0367096	0.0136033	0.0304337	0.27406
GSM4643733_E12.5ovary_ACTTTCATCCTGCCAT	4.43175e-05	0.00350791	0.141094	0.000180101	0.191079	0.649064	0.0149968	3.39399e-05
GSM4643733_E12.5ovary_AGAATAGAGACAAGCC	0.00336302	0.00555074	0.00287355	0.00273468	0.00559972	0.00679412	0.0013716	0.971713
GSM4643733_E12.5ovary_AGAATAGAGTTTCCTT	0.0130233	0.00320946	0.0033604	0.00251621	0.0191595	0.945191	0.00863845	0.00490131
GSM4643733_E12.5ovary_AGAATAGCACGCATCG	0.00654623	0.118466	0.1558	0.00914088	0.247022	0.403789	0.056581	0.00265477
GSM4643733_E12.5ovary_AGAATAGCATACTACG	0.174962	0.0925855	0.0695614	0.044392	0.0855921	0.220728	0.0935166	0.218663
GSM4643733_E12.5ovary_AGAATAGCATGAAGTA	0.852984	0.129426	0.00238516	0.000187902	0.00260404	0.0118397	0.000538403	3.51106e-05
GSM4643733_E12.5ovary_AGAATAGGTCTCTTAT	0.0029354	0.0130188	0.0266858	0.00744018	0.359149	0.0994327	0.488331	0.00300749
GSM4643733_E12.5ovary_AGAATAGGTTACAGAA	0.798208	0.0294882	0.0107878	0.0393231	0.02675	0.00745377	0.0474307	0.0405583
GSM4643733_E12.5ovary_AGAATAGTCAGCTGGC	0.00101212	0.00206513	0.00338392	0.0225438	0.560461	0.0143321	0.0141297	0.382072
GSM4643733_E12.5ovary_AGAATAGTCTCTAAGG	0.00399248	0.254072	0.338127	0.0135228	0.00852862	0.370435	0.0101141	0.00120844
GSM4643733_E12.5ovary_AGACGTTCATGATCCA	0.374582	0.0195095	0.00716393	0.0347011	0.0176198	0.0061059	0.0319951	0.508323
GSM4643733_E12.5ovary_AGACGTTGTGTTGAGG	0.000457416	0.00283417	0.0238223	0.00114072	0.26392	0.491065	0.216115	0.00064572
GSM4643733_E12.5ovary_AGACGTTTCAAACCAC	0.00539837	0.076091	0.0284272	0.000637364	0.0527203	0.789355	0.0334822	0.0138884
GSM4643733_E12.5ovary_AGAGCGAAGAATAGGG	0.0190859	0.914514	0.0275494	0.000936252	0.00818058	0.010198	0.00142079	0.0181151
GSM4643733_E12.5ovary_AGAGCGACACGTCAGC	0.316996	0.0543252	0.034063	0.16482	0.160395	0.0488237	0.0827334	0.137844
GSM4643733_E12.5ovary_AGAGCGATCGTGGACC	0.00279531	0.264774	0.4778	0.00422419	0.0740755	0.123484	0.0508699	0.00197698
GSM4643733_E12.5ovary_AGAGCGATCTGGCGTG	0.00751669	0.0761584	0.532139	0.013443	0.248646	0.0631257	0.0339782	0.0249936
GSM4643733_E12.5ovary_AGAGCGATCTGTTTGT	0.000267706	0.0223439	0.0228871	0.00061306	0.0806754	0.869328	0.00383427	5.08411e-05
GSM4643733_E12.5ovary_AGAGCTTAGCCACTAT	0.0436928	0.531109	0.0375462	0.00174061	0.061871	0.31799	0.00554342	0.000507205
GSM4643733_E12.5ovary_AGAGCTTAGTGGAGAA	0.951854	0.0125256	0.00300081	0.0111966	0.0105015	0.00344999	0.00208453	0.00538699
GSM4643733_E12.5ovary_AGAGCTTCACAGAGGT	0.0932995	0.236426	0.200051	0.013603	0.0987235	0.24957	0.103826	0.0045015
GSM4643733_E12.5ovary_AGAGCTTTCCCTGACT	0.0201824	0.431194	0.00401341	0.00027342	0.0146376	0.520244	0.00927354	0.000181056
GSM4643733_E12.5ovary_AGAGTGGCAAGTTGTC	0.350874	0.0232867	0.00508726	0.047457	0.0427426	0.00770441	0.0697752	0.453073
GSM4643733_E12.5ovary_AGAGTGGCATGACATC	0.118935	0.00966793	0.00389335	0.0244279	0.0478315	0.00720193	0.701841	0.0862019
GSM4643733_E12.5ovary_AGAGTGGTCCTAGTGA	0.0496712	0.23376	0.144163	0.0296634	0.116291	0.322129	0.0899665	0.0143549
GSM4643733_E12.5ovary_AGAGTGGTCGGAATCT	0.00322415	0.00988377	0.0528943	0.0022809	0.168839	0.669486	0.0919296	0.00146249
GSM4643733_E12.5ovary_AGATCTGGTAACGTTC	0.0057802	0.0170578	0.0155351	0.00219557	0.628876	0.041244	0.107109	0.182202
GSM4643733_E12.5ovary_AGATCTGGTCCGTTAA	0.00273945	0.0240496	0.00774143	0.000699206	0.0344102	0.0331493	0.896844	0.000366654
GSM4643733_E12.5ovary_AGATCTGTCGCCTGTT	0.00405086	0.0258603	0.0521896	0.00441236	0.243897	0.159723	0.00858019	0.501287
GSM4643733_E12.5ovary_AGATCTGTCTGCAGTA	0.00049982	0.00338425	0.0135225	0.00075202	0.571361	0.201637	0.208227	0.000615487
GSM4643733_E12.5ovary_AGATTGCAGGGTGTGT	0.018354	0.00232042	0.00146621	0.00432431	0.003167	0.00164711	0.00359328	0.965128
GSM4643733_E12.5ovary_AGATTGCGTGGTCCGT	0.0548426	0.0916605	0.0751794	0.0961946	0.18557	0.117151	0.331051	0.0483511
GSM4643733_E12.5ovary_AGCAGCCAGAAGGTGA	0.0102503	0.0366096	0.121038	0.00581757	0.369844	0.343333	0.108802	0.00430409
GSM4643733_E12.5ovary_AGCAGCCGTAAACGCG	0.646027	0.326925	0.00290477	0.0031139	0.00376129	0.0123788	0.00175177	0.00313761
GSM4643733_E12.5ovary_AGCAGCCGTAGGGACT	0.0024421	0.00694411	0.00857817	0.00871828	0.655595	0.0168443	0.216484	0.0843941
GSM4643733_E12.5ovary_AGCAGCCTCCTTGACC	0.0028782	0.83051	0.0668112	0.00276932	0.0358545	0.0521063	0.00895308	0.000117056
GSM4643733_E12.5ovary_AGCAGCCTCGAATCCA	0.0211501	0.208141	0.340347	0.00276362	0.209367	0.172854	0.0383983	0.00697876
GSM4643733_E12.5ovary_AGCATACAGGAATGGA	0.34202	0.0173619	0.00691883	0.0302802	0.0153089	0.00550753	0.0238501	0.558753
GSM4643733_E12.5ovary_AGCATACGTATGGTTC	0.623336	0.189739	0.0137644	0.00664676	0.063611	0.0622623	0.0128835	0.0277572
GSM4643733_E12.5ovary_AGCATACGTCCAAGTT	0.136646	0.14218	0.0491552	0.0237944	0.113194	0.290426	0.109035	0.135569
GSM4643733_E12.5ovary_AGCCTAAAGGAACTGC	0.000939664	0.00624917	0.0140236	0.004787	0.250701	0.0488281	0.673704	0.000767821
GSM4643733_E12.5ovary_AGCCTAATCCTTAATC	0.000264629	0.00600503	0.019191	0.000180027	0.057837	0.886614	0.029785	0.000123574
GSM4643733_E12.5ovary_AGCGGTCCAATCAGAA	0.000647573	0.0491299	0.0959716	0.00153984	0.101157	0.742494	0.00856559	0.000494906
GSM4643733_E12.5ovary_AGCGGTCCACGCGAAA	0.035719	0.210362	0.00282529	0.000506301	0.0121853	0.73323	0.00362618	0.00154548
GSM4643733_E12.5ovary_AGCGGTCGTTAAAGTG	0.00304996	0.119947	0.138551	0.00811165	0.420347	0.229144	0.079847	0.00100252
GSM4643733_E12.5ovary_AGCGGTCGTTACAGAA	0.00347877	0.129367	0.0791818	0.00335008	0.0990545	0.614161	0.0691135	0.00229325
GSM4643733_E12.5ovary_AGCGTATCACGGTTTA	0.29963	0.0216918	0.0100498	0.0338865	0.0326509	0.00662279	0.038853	0.556616
GSM4643733_E12.5ovary_AGCGTATCATCCGGGT	0.00254534	0.0308164	0.0236455	0.00326754	0.158725	0.0762205	0.702647	0.0021331
GSM4643733_E12.5ovary_AGCGTCGCACAGGTTT	0.00110033	0.0124644	0.0237828	0.00045354	0.391171	0.555752	0.0151669	0.00010883
GSM4643733_E12.5ovary_AGCGTCGGTGTCGCTG	0.00202653	0.0553366	0.0135543	0.000141062	0.0216547	0.904819	0.00169436	0.000773082
GSM4643733_E12.5ovary_AGCGTCGGTTGCGTTA	0.00859733	0.33594	0.18848	0.0106907	0.0290266	0.412941	0.0115202	0.00280411
GSM4643733_E12.5ovary_AGCTCCTAGAAGCCCA	0.847198	0.0546936	0.0012794	0.000207904	0.0172872	0.0777019	0.00122898	0.000402834
GSM4643733_E12.5ovary_AGCTCCTAGCTGAAAT	0.0070614	0.0106402	0.00749594	0.00375447	0.0792234	0.0147303	0.873617	0.00347754
GSM4643733_E12.5ovary_AGCTCCTAGGCACATG	0.0515112	0.134247	0.0492131	0.447075	0.149298	0.0336844	0.036572	0.0983992
GSM4643733_E12.5ovary_AGCTCCTAGGCGATAC	0.00444479	0.463605	0.247959	0.00478318	0.00874981	0.261204	0.00609443	0.00315984
GSM4643733_E12.5ovary_AGCTCCTCAGTAAGCG	0.513896	0.0626384	0.0182075	0.00934771	0.0544768	0.0753266	0.123463	0.142644
GSM4643733_E12.5ovary_AGCTCCTCATAACCTG	0.00771438	0.0709244	0.125838	0.194669	0.0659507	0.327849	0.203089	0.00396537
GSM4643733_E12.5ovary_AGCTCCTCATCACCCT	0.0914348	0.277511	0.0912527	0.0710006	0.185232	0.100233	0.114313	0.0690231
GSM4643733_E12.5ovary_AGCTCCTGTCCAACTA	0.00378416	0.0111184	0.0531942	0.00265802	0.145765	0.691294	0.0915752	0.000610664
GSM4643733_E12.5ovary_AGCTCCTGTCTCCACT	0.135316	0.00418488	0.000855221	0.000739879	0.00428853	0.00531455	0.00176015	0.847541
GSM4643733_E12.5ovary_AGCTCCTTCTTCATGT	0.0631868	0.900638	0.0141763	0.000154864	0.00406267	0.0168216	0.000853482	0.000106826
GSM4643733_E12.5ovary_AGCTCTCAGAGAGCTC	0.000290053	0.0191165	0.0167084	0.0200691	0.91851	0.0113578	0.0133528	0.00059524
GSM4643733_E12.5ovary_AGCTCTCCACAACGCC	0.234976	0.0595521	0.0292563	0.0263721	0.308154	0.232178	0.069272	0.0402397
GSM4643733_E12.5ovary_AGCTCTCGTAGCCTCG	5.90991e-05	0.00554995	0.0105591	0.00234387	0.87454	0.060667	0.0453345	0.000946766
GSM4643733_E12.5ovary_AGCTCTCGTTCACGGC	0.000404628	0.0187953	0.025765	0.00260687	0.259961	0.681976	0.0102863	0.000205598
GSM4643733_E12.5ovary_AGCTCTCTCACAAACC	0.00570552	0.0155252	0.10895	0.00273881	0.197005	0.603388	0.065264	0.0014234
GSM4643733_E12.5ovary_AGCTTGAAGCTAGTTC	0.00153266	0.0190028	0.141131	0.00157189	0.0705364	0.719721	0.0451139	0.00139042
GSM4643733_E12.5ovary_AGCTTGACATTAGCCA	0.000814999	0.0269308	0.140118	0.00332569	0.130703	0.650204	0.0474025	0.000500372
GSM4643733_E12.5ovary_AGCTTGAGTCTTCGTC	0.00197088	0.0968685	0.301495	0.00265514	0.354985	0.228164	0.0131844	0.000677844
GSM4643733_E12.5ovary_AGCTTGAGTGCGGTAA	0.0163584	0.220441	0.0897686	0.0174744	0.429818	0.212579	0.0108476	0.00271303
GSM4643733_E12.5ovary_AGCTTGAGTTGTCTTT	0.138593	0.0427694	0.0166613	0.0688393	0.28186	0.0204903	0.0326409	0.398146
GSM4643733_E12.5ovary_AGCTTGATCCAGAGGA	0.00110333	0.00525599	0.00521443	0.000358228	0.0308454	0.0113429	0.945517	0.000362611
GSM4643733_E12.5ovary_AGGCCACGTACGACCC	0.00320931	0.375893	0.258502	0.0635212	0.201061	0.0882313	0.00679439	0.00278745
GSM4643733_E12.5ovary_AGGCCACTCTTCTGGC	0.000732756	0.0234503	0.0794993	0.00160219	0.493829	0.0212393	0.379282	0.000365717
GSM4643733_E12.5ovary_AGGCCACTCTTGACGA	0.0232091	0.0767486	0.133308	0.00995507	0.23365	0.470495	0.050068	0.00256572
GSM4643733_E12.5ovary_AGGCCGTAGAAAGTGG	0.0108457	0.0334292	0.116392	0.0213782	0.0883727	0.0483791	0.63884	0.0423633
GSM4643733_E12.5ovary_AGGCCGTCACATCCGG	0.982403	0.00476679	0.000767269	0.000663489	0.0023261	0.00821763	0.000374304	0.000481162
GSM4643733_E12.5ovary_AGGCCGTTCTTATCTG	0.00123234	0.0512735	0.170335	0.0223391	0.610638	0.107201	0.03656	0.000420572
GSM4643733_E12.5ovary_AGGGAGTCAACTTGAC	0.591988	0.0455931	0.0202604	0.046023	0.064522	0.0177621	0.12414	0.0897108
GSM4643733_E12.5ovary_AGGGAGTCACAGGTTT	0.00245706	0.0166847	0.0345609	0.00770844	0.523438	0.340446	0.0682472	0.00645767
GSM4643733_E12.5ovary_AGGGAGTCACATAACC	3.91648e-05	0.00754239	0.018308	7.43136e-06	0.00933496	0.960972	0.00379404	1.91471e-06
GSM4643733_E12.5ovary_AGGGAGTTCATCACCC	0.751474	0.0289368	0.00672924	0.0104125	0.0395313	0.0110764	0.0247218	0.127118
GSM4643733_E12.5ovary_AGGGAGTTCCGCAGTG	0.0040671	0.19233	0.201453	0.000933573	0.0374103	0.560552	0.00261795	0.000635935
GSM4643733_E12.5ovary_AGGGAGTTCCTTTACA	0.954414	0.0118879	0.000713718	0.00197531	0.018243	0.00445107	0.00250771	0.00580763
GSM4643733_E12.5ovary_AGGGATGAGAGGTTAT	0.0031878	0.604042	0.247906	6.30818e-05	0.0138175	0.127191	0.00373511	5.64689e-05
GSM4643733_E12.5ovary_AGGGATGCAGATGAGC	0.00812151	0.163443	0.0322875	0.00360033	0.60003	0.176518	0.0121357	0.00386316
GSM4643733_E12.5ovary_AGGGATGGTCGAATCT	0.00407415	0.609794	0.0682653	0.0179217	0.11515	0.174974	0.00798037	0.00184045
GSM4643733_E12.5ovary_AGGGATGTCCCTAACC	0.00923141	0.00263819	0.000853734	0.00237776	0.00277741	0.00156273	0.0264843	0.954074
GSM4643733_E12.5ovary_AGGGATGTCGCGATCG	0.000147259	0.0965318	0.459471	0.000238185	0.0172486	0.425149	0.00110209	0.000112057
GSM4643733_E12.5ovary_AGGGTGAAGTACGCGA	0.204844	0.308593	0.0499395	0.00123594	0.00607993	0.424245	0.00413863	0.000923553
GSM4643733_E12.5ovary_AGGGTGAAGTCCGTAT	0.00217515	0.000599321	0.001301	0.00111812	0.00494521	0.0053402	0.00490137	0.97962
GSM4643733_E12.5ovary_AGGGTGACATCCGTGG	0.00655338	0.0736294	0.13724	0.00765229	0.090137	0.384456	0.295027	0.00530485
GSM4643733_E12.5ovary_AGGGTGAGTCCGAAGA	0.0524417	0.0218617	0.021641	0.0193524	0.529787	0.0774223	0.246976	0.0305176
GSM4643733_E12.5ovary_AGGGTGAGTTCGGCAC	0.00316559	0.00751283	0.0447654	0.00308254	0.388296	0.0795956	0.445069	0.0285133
GSM4643733_E12.5ovary_AGGGTGATCTTGGGTA	0.0246471	0.135243	0.0686924	0.0390002	0.139781	0.333776	0.0926992	0.166162
GSM4643733_E12.5ovary_AGGTCATAGATCCCGC	0.00852705	0.00689473	0.0106633	0.0296125	0.252521	0.0232096	0.408881	0.259691
GSM4643733_E12.5ovary_AGGTCATAGTCCAGGA	0.0152144	0.194798	0.354293	0.0118008	0.150708	0.17427	0.0947407	0.00417469
GSM4643733_E12.5ovary_AGGTCATTCTACTTAC	0.00158855	0.0163195	0.124935	0.00181153	0.221114	0.383415	0.249542	0.00127476
GSM4643733_E12.5ovary_AGGTCATTCTGTGCAA	0.0038794	0.258183	0.103852	0.011809	0.399719	0.0104974	0.210636	0.00142451
GSM4643733_E12.5ovary_AGGTCCGAGAGATGAG	0.000126417	0.00426408	0.028602	0.000113564	0.0186077	0.926343	0.0218702	7.30999e-05
GSM4643733_E12.5ovary_AGGTCCGGTCTTGTCC	0.0962292	0.0197526	0.00863962	0.017863	0.0215264	0.00388068	0.0176196	0.814489
GSM4643733_E12.5ovary_AGGTCCGGTTCCCGAG	0.0283853	0.105299	0.0806789	0.00703646	0.08231	0.390505	0.29748	0.0083057
GSM4643733_E12.5ovary_AGGTCCGTCATTCACT	0.0019497	0.336663	0.295291	0.00542697	0.216199	0.136875	0.00597051	0.00162403
GSM4643733_E12.5ovary_AGGTCCGTCCAAATGC	0.00842005	0.224667	0.0710227	0.0333145	0.0987365	0.5077	0.05514	0.000999551
GSM4643733_E12.5ovary_AGTAGTCAGTTTCCTT	7.23754e-05	0.0177574	0.0460393	0.00253848	0.151147	0.775796	0.00660769	4.18814e-05
GSM4643733_E12.5ovary_AGTAGTCCAAAGGAAG	0.00152435	0.00330659	0.00540392	0.0008339	0.644837	0.262509	0.0811646	0.000420045
GSM4643733_E12.5ovary_AGTAGTCGTCAGAAGC	0.369176	0.0772196	0.0267503	0.0556487	0.257227	0.167472	0.0260828	0.0204238
GSM4643733_E12.5ovary_AGTAGTCTCCGCGCAA	0.0191503	0.00715415	0.00256165	0.00680498	0.00491363	0.00527421	0.00530506	0.948836
GSM4643733_E12.5ovary_AGTAGTCTCCTAGTGA	0.00050125	0.0562759	0.0919042	0.00764602	0.757579	0.0751134	0.0104016	0.000578839
GSM4643733_E12.5ovary_AGTAGTCTCGCGGATC	0.350917	0.0786208	0.00980235	0.00786383	0.18216	0.111071	0.0251976	0.234367
GSM4643733_E12.5ovary_AGTCTTTAGCTGCAAG	0.0662743	0.0532151	0.0136227	0.0186287	0.35127	0.293287	0.195272	0.00842954
GSM4643733_E12.5ovary_AGTCTTTAGTGACTCT	0.00181524	0.679226	0.10434	0.0436895	0.0761543	0.0928245	0.00133328	0.000617574
GSM4643733_E12.5ovary_AGTCTTTCAAACAACA	0.427539	0.0343658	0.00545488	0.0192276	0.0273934	0.014675	0.0176279	0.453717
GSM4643733_E12.5ovary_AGTGAGGGTAATTGGA	0.000363155	0.00154115	0.00361818	0.000645427	0.303041	0.0265879	0.635562	0.028642
GSM4643733_E12.5ovary_AGTGAGGGTAGCCTCG	0.00656845	0.630923	0.0887894	0.000961531	0.0537157	0.216426	0.00202596	0.00058933
GSM4643733_E12.5ovary_AGTGAGGGTCTGCGGT	0.0203405	0.075638	0.091947	0.113339	0.391204	0.163156	0.123428	0.0209477
GSM4643733_E12.5ovary_AGTGGGAAGCGTGAAC	4.20162e-05	7.31211e-05	4.86549e-05	6.62437e-05	0.0535144	0.000638979	0.943829	0.00178708
GSM4643733_E12.5ovary_AGTGTCAGTTGTGGCC	0.0354612	0.0842389	0.182972	0.0393319	0.0801709	0.0753152	0.122286	0.380224
GSM4643733_E12.5ovary_AGTTGGTCACTCTGTC	0.375102	0.01831	0.00729187	0.0288534	0.0158087	0.005811	0.0251863	0.523636
GSM4643733_E12.5ovary_AGTTGGTGTGACTACT	0.0232029	0.19717	0.172585	0.0328726	0.285292	0.0861095	0.180872	0.0218969
GSM4643733_E12.5ovary_ATAACGCGTAGAGCTG	0.00697047	0.385977	0.113386	0.0102588	0.288425	0.177715	0.0114939	0.00577428
GSM4643733_E12.5ovary_ATAACGCGTAGGGACT	0.212301	0.0232966	0.00840615	0.0786268	0.0660332	0.0330196	0.0441643	0.534152
GSM4643733_E12.5ovary_ATAACGCTCACATAGC	0.539136	0.135228	0.0788182	0.0118278	0.0451509	0.0406638	0.12274	0.0264354
GSM4643733_E12.5ovary_ATAAGAGCAGATAATG	0.0166785	0.466946	0.0968992	0.00470563	0.111669	0.220311	0.079764	0.00302712
GSM4643733_E12.5ovary_ATAAGAGTCTTCTGGC	0.00254304	0.194821	0.180068	0.00276857	0.126498	0.486784	0.00517009	0.00134647
GSM4643733_E12.5ovary_ATAGACCCAATGCCAT	0.0192926	0.00951	0.0118284	0.00551103	0.0821642	0.161589	0.574142	0.135963
GSM4643733_E12.5ovary_ATAGACCCACAGGTTT	0.108625	0.0100208	0.00498043	0.021191	0.0280401	0.00515619	0.0791588	0.742828
GSM4643733_E12.5ovary_ATAGACCCAGACAGGT	0.000421145	0.0153462	0.0308147	0.000162512	0.0532651	0.876886	0.0229096	0.000195112
GSM4643733_E12.5ovary_ATAGACCGTGATGTCT	5.36308e-05	0.00595745	0.014014	3.6303e-05	0.00666135	0.968384	0.00488408	9.27862e-06
GSM4643733_E12.5ovary_ATAGACCGTTGAGGTG	0.12323	0.0686228	0.0377032	0.053411	0.127898	0.403175	0.023495	0.162465
GSM4643733_E12.5ovary_ATAGACCTCTCTGAGA	0.0122967	0.0841537	0.318101	0.0460628	0.143652	0.0657356	0.261206	0.0687922
GSM4643733_E12.5ovary_ATAGACCTCTTGCAAG	0.016325	0.00740193	0.000715285	0.000752816	0.00398993	0.962011	0.00667389	0.00213032
GSM4643733_E12.5ovary_ATCACGAAGGCTAGCA	0.0114282	0.375329	0.160798	0.00572062	0.152022	0.256831	0.0333433	0.00452731
GSM4643733_E12.5ovary_ATCACGACAAACCCAT	0.00359505	0.0727809	0.0333086	0.010268	0.387465	0.430052	0.0511888	0.0113424
GSM4643733_E12.5ovary_ATCACGAGTCCATGAT	0.141512	0.010228	0.00469497	0.0245681	0.0387501	0.00551846	0.124216	0.650512
GSM4643733_E12.5ovary_ATCATCTCACCGTTGG	0.0058222	0.112351	0.335296	0.0476112	0.161172	0.307525	0.0198348	0.0103872
GSM4643733_E12.5ovary_ATCATCTCATATGGTC	0.345951	0.0171704	0.00650193	0.0286021	0.0173017	0.00546618	0.0343809	0.544626
GSM4643733_E12.5ovary_ATCATCTGTGGACGAT	0.66488	0.262986	0.00998459	0.00414047	0.00812067	0.027803	0.00674689	0.0153391
GSM4643733_E12.5ovary_ATCATCTTCATCGCTC	0.068035	0.133183	0.0560229	0.00977242	0.654373	0.0590913	0.0176328	0.00188944
GSM4643733_E12.5ovary_ATCATCTTCTCGGACG	0.00021201	0.0138287	0.00136679	2.0557e-05	0.00307323	0.981269	0.000228474	1.04559e-06
GSM4643733_E12.5ovary_ATCATGGAGGACTGGT	0.000193175	0.0158091	0.125421	0.0017153	0.0235868	0.811037	0.0221127	0.000124714
GSM4643733_E12.5ovary_ATCATGGAGGCATTGG	0.0138812	0.15453	0.239672	0.0358031	0.223221	0.159534	0.138792	0.0345659
GSM4643733_E12.5ovary_ATCATGGCACGAAGCA	0.00947051	0.0291689	0.0843708	0.00227816	0.536986	0.267151	0.0690796	0.00149438
GSM4643733_E12.5ovary_ATCATGGGTATTAGCC	0.00656883	0.924228	0.023664	6.4951e-05	0.000649157	0.0437064	0.00108979	2.85585e-05
GSM4643733_E12.5ovary_ATCATGGGTCGAGATG	2.91738e-05	0.0045768	0.0179527	1.00599e-05	0.00297035	0.973872	0.000588818	5.60914e-07
GSM4643733_E12.5ovary_ATCCACCAGGCTACGA	0.255653	0.0366126	0.00547061	0.0411778	0.0161193	0.0296728	0.0247431	0.590551
GSM4643733_E12.5ovary_ATCCACCCACGTTGGC	0.274592	0.46889	0.0469694	0.102621	0.0493506	0.038193	0.0164691	0.00291519
GSM4643733_E12.5ovary_ATCCACCGTACTCAAC	0.00209432	0.0111061	0.0206257	0.00671781	0.449018	0.130942	0.377987	0.00150905
GSM4643733_E12.5ovary_ATCCACCGTGCTTCTC	0.705769	0.0360439	0.0093543	0.0245465	0.0326736	0.0169147	0.0124611	0.162237
GSM4643733_E12.5ovary_ATCCACCGTTATCCGA	0.252425	0.026558	0.00507672	0.000916149	0.0279582	0.672559	0.0138044	0.000703132
GSM4643733_E12.5ovary_ATCCACCGTTGGGACA	0.00671334	0.670808	0.17038	0.0133567	0.0811806	0.0263006	0.0310771	0.00018307
GSM4643733_E12.5ovary_ATCCACCTCATAGCAC	0.850328	0.0593852	0.00573021	0.00302847	0.0089463	0.0592842	0.00259723	0.0107008
GSM4643733_E12.5ovary_ATCCACCTCGCATGAT	0.0738122	0.036832	0.00523243	0.00150027	0.0430873	0.742019	0.0942914	0.00322577
GSM4643733_E12.5ovary_ATCCACCTCGTCTGCT	0.0152591	0.113479	0.153253	0.00237997	0.126073	0.547859	0.0392964	0.00239894
GSM4643733_E12.5ovary_ATCCGAAGTATCACCA	0.0784293	0.0128848	0.0100888	0.0287622	0.0595199	0.00701465	0.0382443	0.765056
GSM4643733_E12.5ovary_ATCGAGTAGATACACA	0.149117	0.0383272	0.0129807	0.0517188	0.184433	0.315577	0.0417774	0.206069
GSM4643733_E12.5ovary_ATCGAGTCAAATCCGT	0.103325	0.0650121	0.00213982	0.000507792	0.0269465	0.795471	0.0054713	0.00112586
GSM4643733_E12.5ovary_ATCGAGTTCACCTTAT	0.667354	0.0353738	0.0103733	0.0150393	0.0298754	0.024297	0.0599077	0.157779
GSM4643733_E12.5ovary_ATCTACTAGAGAACAG	0.026028	0.171719	0.191961	0.0365195	0.286061	0.0933485	0.0573183	0.137045
GSM4643733_E12.5ovary_ATCTACTAGATCTGCT	0.0263411	0.0302111	0.0144632	0.00178363	0.100092	0.801405	0.0252564	0.000447823
GSM4643733_E12.5ovary_ATCTACTCAGTTAACC	0.758143	0.0439626	0.00459498	0.00071256	0.00479244	0.179792	0.00547987	0.00252193
GSM4643733_E12.5ovary_ATCTACTCATTAACCG	0.00850114	0.0183368	0.022375	0.00659029	0.597156	0.175047	0.156471	0.0155239
GSM4643733_E12.5ovary_ATCTACTGTACGACCC	0.00246371	0.0223007	0.00981338	9.9824e-05	0.00221555	0.961422	0.00167233	1.24592e-05
GSM4643733_E12.5ovary_ATCTACTGTGACGCCT	0.00289293	0.00790547	0.0321925	0.00697568	0.404174	0.247384	0.296187	0.00228926
GSM4643733_E12.5ovary_ATCTACTTCTAACGGT	0.00126912	0.00780297	0.0099355	0.00206084	0.535982	0.0565747	0.382968	0.00340633
GSM4643733_E12.5ovary_ATCTGCCAGAATCTCC	0.0658213	0.0337881	0.0118247	0.00403808	0.087594	0.0868203	0.192059	0.518055
GSM4643733_E12.5ovary_ATCTGCCAGATATGGT	0.00303604	0.0611056	0.0204652	0.00879342	0.828146	0.00739504	0.0689396	0.0021194
GSM4643733_E12.5ovary_ATCTGCCAGCGTTCCG	0.000102141	0.0061795	0.923451	0.00538539	0.0451315	0.0101609	0.00881501	0.000774425
GSM4643733_E12.5ovary_ATCTGCCGTACTTAGC	0.000717535	0.00647799	0.00804901	1.68557e-05	0.00883439	0.972075	0.00380823	2.1252e-05
GSM4643733_E12.5ovary_ATCTGCCGTGACCAAG	0.0665713	0.0726521	0.122058	0.0282796	0.0638855	0.065878	0.13493	0.445745
GSM4643733_E12.5ovary_ATCTGCCTCCAGTATG	0.291989	0.221956	0.0340554	0.012144	0.0368663	0.377651	0.0157174	0.00962047
GSM4643733_E12.5ovary_ATCTGCCTCTTAACCT	0.00570059	0.00477635	0.004418	0.0616052	0.45627	0.0253379	0.346699	0.0951936
GSM4643733_E12.5ovary_ATGAGGGAGGAATCGC	0.000115361	0.0117264	0.967464	0.000124938	0.00948987	0.0104701	0.000584236	2.52047e-05
GSM4643733_E12.5ovary_ATGAGGGAGTGGACGT	0.000219565	0.945949	0.0216251	0.000106342	0.00311591	0.020112	0.00881669	5.53666e-05
GSM4643733_E12.5ovary_ATGAGGGCAGCCACCA	0.00259842	0.0162193	0.0473905	0.0170026	0.551024	0.132326	0.231353	0.00208626
GSM4643733_E12.5ovary_ATGAGGGGTCACCCAG	0.00457969	0.0286611	0.0691511	0.089302	0.476999	0.0677288	0.0877099	0.175869
GSM4643733_E12.5ovary_ATGAGGGTCTTCAACT	0.000132675	0.0344979	0.0194008	7.1048e-05	0.02826	0.914791	0.00274155	0.000105057
GSM4643733_E12.5ovary_ATGCGATCAACAACCT	0.305317	0.0119141	0.00522503	0.0239505	0.0177072	0.00423444	0.0225892	0.609063
GSM4643733_E12.5ovary_ATGGGAGCAATCTACG	0.0024161	0.0628726	0.0195585	0.0145892	0.0781729	0.802108	0.0195972	0.000685613
GSM4643733_E12.5ovary_ATGGGAGGTCTAGGTT	0.179424	0.0885728	0.0218198	0.0123959	0.0995597	0.0485267	0.130635	0.419066
GSM4643733_E12.5ovary_ATGGGAGTCGCGATCG	0.424567	0.126524	0.0731486	0.0880643	0.135286	0.0249721	0.0815346	0.0459037
GSM4643733_E12.5ovary_ATGGGAGTCTATGTGG	0.0238117	0.178623	0.039944	0.0544466	0.411192	0.249053	0.0399091	0.00302048
GSM4643733_E12.5ovary_ATGGGAGTCTTTCCTC	0.757475	0.015938	0.00682714	0.0133136	0.0172035	0.0158437	0.0163155	0.157083
GSM4643733_E12.5ovary_ATGTGTGAGATGTAAC	0.00312907	0.134595	0.0766174	0.00464419	0.0583348	0.648552	0.0724368	0.00169082
GSM4643733_E12.5ovary_ATGTGTGCAATGGACG	0.341964	0.0425326	0.027176	0.0549854	0.14268	0.0163805	0.148917	0.225365
GSM4643733_E12.5ovary_ATGTGTGCAGGGTATG	0.0225719	0.0735212	0.0111805	0.00861575	0.12865	0.241468	0.0205246	0.493468
GSM4643733_E12.5ovary_ATGTGTGCATCCAACA	0.0080593	0.0360964	0.0531041	0.013777	0.225608	0.572524	0.0820114	0.00881945
GSM4643733_E12.5ovary_ATGTGTGGTCGGGTCT	0.608231	0.0346945	0.0200153	0.0478327	0.0450933	0.0102514	0.0601752	0.173706
GSM4643733_E12.5ovary_ATGTGTGGTTATCCGA	0.688251	0.00698076	0.00280883	0.000134889	0.00534389	0.294703	0.0013821	0.000395777
GSM4643733_E12.5ovary_ATGTGTGTCGAACGGA	0.000107549	0.00188007	0.0195411	0.000250831	0.30684	0.666753	0.00458714	3.94803e-05
GSM4643733_E12.5ovary_ATGTGTGTCGCGGATC	0.00298047	0.272343	0.258683	0.00696952	0.0909816	0.356861	0.0107631	0.000418893
GSM4643733_E12.5ovary_ATGTGTGTCTAGAGTC	0.000615557	0.00605907	0.0412675	0.00052505	0.260543	0.447796	0.23909	0.00410384
GSM4643733_E12.5ovary_ATTACTCCAGAGCCAA	0.0395806	0.0401691	0.0198473	0.0136547	0.413688	0.100003	0.349704	0.023354
GSM4643733_E12.5ovary_ATTACTCTCACAATGC	0.000441655	0.00199932	0.00202865	0.00292314	0.640613	0.0303365	0.321341	0.000315927
GSM4643733_E12.5ovary_ATTACTCTCACATAGC	0.0060696	0.00371504	0.00914836	0.0369854	0.0266022	0.0188878	0.0127923	0.885799
GSM4643733_E12.5ovary_ATTACTCTCATGTCTT	0.040709	0.719049	0.0330039	0.0007457	0.0124279	0.181554	0.0116488	0.000861802
GSM4643733_E12.5ovary_ATTATCCCACCTATCC	0.00120827	0.00131705	0.00320897	0.0128039	0.610123	0.0163237	0.130016	0.224999
GSM4643733_E12.5ovary_ATTATCCCATAGGATA	0.0102735	0.132152	0.0527085	0.0190299	0.313754	0.430726	0.0393405	0.00201519
GSM4643733_E12.5ovary_ATTCTACAGCGTGTCC	0.87344	0.0168661	0.00129971	0.00532516	0.0417917	0.0398008	0.0142504	0.00722649
GSM4643733_E12.5ovary_ATTCTACAGTGATCGG	0.0391817	0.00313569	0.000852501	0.000257619	0.00347802	0.928162	0.00531734	0.0196153
GSM4643733_E12.5ovary_ATTCTACCAGATCGGA	4.64428e-05	0.00486668	0.00511426	6.21873e-05	0.0242894	0.963913	0.00170383	4.24041e-06
GSM4643733_E12.5ovary_ATTCTACCAGCCAATT	0.0015121	0.370847	0.278089	0.00137465	0.0945886	0.247708	0.00554067	0.000339543
GSM4643733_E12.5ovary_ATTCTACGTTACGGAG	0.00810399	0.0161822	0.0183451	0.000544192	0.0249446	0.357085	0.572674	0.00212096
GSM4643733_E12.5ovary_ATTCTACTCATCGCTC	0.00121696	0.00780133	0.0180224	0.0762051	0.798508	0.0741293	0.0217784	0.00233804
GSM4643733_E12.5ovary_ATTGGACAGGCAATTA	0.000633048	0.0185195	0.0293257	0.000596774	0.0107413	0.0125567	0.00834885	0.919278
GSM4643733_E12.5ovary_ATTGGACCAGCATACT	0.00507873	0.0265188	0.220082	0.01709	0.540504	0.13217	0.0513648	0.0071924
GSM4643733_E12.5ovary_ATTGGACCATGCATGT	0.000684824	0.00410599	0.0377595	0.000689791	0.116914	0.721949	0.117432	0.000465153
GSM4643733_E12.5ovary_ATTGGACGTCACACGC	0.0160657	0.0603945	0.0178732	0.00257473	0.0531952	0.838269	0.0107903	0.000836768
GSM4643733_E12.5ovary_ATTGGACTCCCAACGG	0.000227985	0.0131346	0.0468717	7.17945e-05	0.042138	0.896841	0.000513888	0.000200835
GSM4643733_E12.5ovary_ATTGGACTCTTCTGGC	0.00353015	0.0653952	0.148513	0.00951397	0.706165	0.0467966	0.0188473	0.00123893
GSM4643733_E12.5ovary_ATTGGTGAGGAGCGTT	0.00132151	0.022091	0.0659302	0.00201916	0.440946	0.0908219	0.375756	0.00111401
GSM4643733_E12.5ovary_ATTGGTGCAACCGCCA	0.0147996	0.969478	0.00550491	0.000199933	0.00664422	0.00289044	0.000434206	4.91298e-05
GSM4643733_E12.5ovary_ATTGGTGCAGCCAATT	0.000171305	0.0123414	0.130265	0.010735	0.804176	0.0374518	0.00426731	0.000591846
GSM4643733_E12.5ovary_ATTGGTGGTCATATCG	0.0240126	0.0283656	0.232526	0.0718202	0.295201	0.0758388	0.130736	0.141501
GSM4643733_E12.5ovary_ATTGGTGGTCCTAGCG	0.109454	0.140381	0.0111284	0.00400575	0.376226	0.168301	0.0412274	0.149277
GSM4643733_E12.5ovary_ATTGGTGTCATCACCC	0.103315	0.190126	0.0093537	0.00200632	0.0902665	0.513622	0.0623727	0.0289376
GSM4643733_E12.5ovary_ATTGGTGTCGTACCGG	0.000963053	0.12684	0.192905	0.000933011	0.0166371	0.659718	0.00136801	0.00063561
GSM4643733_E12.5ovary_ATTGGTGTCTCTTATG	0.276289	0.0744631	0.0104238	0.00791927	0.0905781	0.486518	0.00834669	0.0454626
GSM4643733_E12.5ovary_ATTTCTGCACATTAGC	2.61814e-05	0.000116105	0.00288451	0.000792722	0.949072	0.0148646	0.0320845	0.000159127
GSM4643733_E12.5ovary_ATTTCTGCAGCGTTCG	0.0472262	0.0744861	0.0954928	0.025369	0.164972	0.312411	0.201239	0.0788035
[truncated: 16,014 more rows]
