# Supplementary material for: Single-cell roadmap of human gonadal development
Source: Research Square preprint supplement (doi:10.21203/rs.3.rs-496470/v1), 2021-05-21
Supplement: Supplementary file 16 [file 45944c6e8dbc8519b68f78fa.xlsx]

## Sheet: 1_DEGs_germcells
p_val	avg_logFC	pct.1	pct.2	p_val_adj	cluster	gene	avg_log2FC
2.30971e-109	1.40012	0.955	0.329	5.4225e-105	PGC	POU5F1	1.40012
2.53906e-99	1.00405	0.94	0.335	5.96095e-95	PGC	GLIPR2	1.00405
3.94052e-98	1.13474	0.91	0.185	9.25115e-94	PGC	NANOG	1.13474
1.98347e-96	0.857796	1	0.935	4.65658e-92	PGC	RPS13	0.857796
2.26182e-94	1.19254	0.95	0.302	5.31008e-90	PGC	NANOS3	1.19254
4.84842e-92	0.82793	1	0.956	1.13826e-87	PGC	RPS3	0.82793
1.1724e-89	0.728935	1	0.964	2.75244e-85	PGC	RPS14	0.728935
7.02268e-88	0.856782	1	0.953	1.64871e-83	PGC	RPL11	0.856782
7.16494e-88	0.70738	1	0.972	1.68211e-83	PGC	RPL30	0.70738
1.09807e-85	1.20077	0.945	0.43	2.57795e-81	PGC	PDPN	1.20077
2.0878e-85	1.26961	0.97	0.583	4.90154e-81	PGC	APOE	1.26961
2.10736e-83	0.902675	0.785	0.187	4.94744e-79	PGC	AQP3	0.902675
1.52632e-82	0.783642	0.995	0.9	3.58334e-78	PGC	RPL22	0.783642
2.19887e-78	0.739071	1	0.928	5.16228e-74	PGC	RPL35A	0.739071
2.76154e-78	0.782719	1	0.933	6.48326e-74	PGC	RPL37	0.782719
4.30684e-77	0.841163	1	0.938	1.01112e-72	PGC	RPS15A	0.841163
6.17374e-77	0.972455	0.925	0.492	1.44941e-72	PGC	ALPL	0.972455
1.02477e-76	0.91251	0.87	0.339	2.40585e-72	PGC	SOX15	0.91251
5.23738e-75	0.879658	1	0.951	1.22958e-70	PGC	RPS4X	0.879658
2.52053e-74	0.976968	0.805	0.201	5.91746e-70	PGC	GPHA2	0.976968
1.26254e-73	0.856379	0.97	0.815	2.96406e-69	PGC	NDUFAB1	0.856379
8.25251e-72	1.06528	0.94	0.533	1.93744e-67	PGC	APOC1	1.06528
1.50557e-71	0.64278	1	0.978	3.53463e-67	PGC	RPS3A	0.64278
2.83522e-70	0.6944	1	0.945	6.65625e-66	PGC	RPL18	0.6944
1.71117e-69	0.651042	1	0.964	4.01731e-65	PGC	RPS24	0.651042
8.59903e-69	1.06115	0.87	0.406	2.01879e-64	PGC	SAT1	1.06115
1.19081e-68	1.07927	0.945	0.507	2.79567e-64	PGC	DDIT4	1.07927
1.46164e-68	0.949417	0.935	0.498	3.4315e-64	PGC	PQLC3	0.949417
1.15957e-67	0.673653	1	0.968	2.72233e-63	PGC	RPS28	0.673653
1.74384e-67	0.863425	0.945	0.64	4.09402e-63	PGC	MGST3	0.863425
2.00638e-67	0.9036	0.9	0.462	4.71038e-63	PGC	ITM2C	0.9036
5.11576e-67	0.638484	1	0.948	1.20103e-62	PGC	RPL12	0.638484
1.05195e-66	0.706501	0.785	0.178	2.46967e-62	PGC	ETV4	0.706501
3.06456e-66	0.657413	1	0.906	7.19467e-62	PGC	RACK1	0.657413
3.70374e-66	0.581121	1	0.978	8.69526e-62	PGC	RPL28	0.581121
5.28366e-66	0.651767	1	0.988	1.24044e-61	PGC	EEF1A1	0.651767
7.94068e-66	0.82924	0.845	0.299	1.86423e-61	PGC	PLBD1	0.82924
2.40003e-65	0.576968	1	0.958	5.63456e-61	PGC	RPL14	0.576968
1.76168e-64	0.763858	0.835	0.243	4.1359e-60	PGC	MMP2	0.763858
8.0646e-64	0.787798	0.945	0.489	1.89333e-59	PGC	FAM162B	0.787798
1.02585e-63	0.857011	0.755	0.214	2.40839e-59	PGC	RASD1	0.857011
1.08445e-63	0.541603	1	0.983	2.54597e-59	PGC	RPLP1	0.541603
1.74209e-63	0.897749	0.825	0.199	4.08989e-59	PGC	IFITM1	0.897749
3.90455e-63	0.843392	1	0.866	9.1667e-59	PGC	RPL39	0.843392
2.73565e-62	0.566638	1	0.977	6.42249e-58	PGC	RPS7	0.566638
8.58361e-62	0.788178	1	0.948	2.01517e-57	PGC	RPL41	0.788178
6.64815e-61	0.746625	0.99	0.739	1.56079e-56	PGC	SLC25A6	0.746625
1.23418e-60	0.636924	1	0.927	2.89748e-56	PGC	RPL34	0.636924
1.28222e-59	0.496623	0.62	0.109	3.01026e-55	PGC	ACP5	0.496623
2.32417e-59	-1.61066	0.115	0.642	5.45646e-55	PGC	SMC1B	-1.61066
3.03593e-59	0.745255	0.88	0.342	7.12744e-55	PGC	RGS10	0.745255
3.60611e-59	0.588859	1	0.962	8.46607e-55	PGC	RPS18	0.588859
7.01523e-59	0.796155	0.955	0.624	1.64697e-54	PGC	MKRN1	0.796155
1.42034e-58	0.589568	1	0.92	3.33452e-54	PGC	RPL24	0.589568
2.88323e-58	0.648487	0.99	0.792	6.76895e-54	PGC	TOMM7	0.648487
5.00558e-57	0.677058	0.845	0.359	1.17516e-52	PGC	S100A13	0.677058
9.62828e-57	0.516781	1	0.983	2.26043e-52	PGC	RPL7A	0.516781
1.35714e-56	-1.50805	0.255	0.718	3.18616e-52	PGC	STK31	-1.50805
1.29175e-55	0.544631	1	0.968	3.03263e-51	PGC	RPS23	0.544631
4.58754e-55	0.463185	1	0.967	1.07702e-50	PGC	RPL19	0.463185
1.08451e-54	0.521285	0.685	0.159	2.54611e-50	PGC	PPM1N	0.521285
1.17882e-54	0.548991	0.65	0.121	2.7675e-50	PGC	SUSD2	0.548991
1.77839e-54	0.583909	1	0.98	4.17513e-50	PGC	RPS8	0.583909
1.45342e-53	0.815096	0.895	0.481	3.41221e-49	PGC	L1TD1	0.815096
8.31744e-53	0.658769	0.89	0.455	1.95269e-48	PGC	SMAGP	0.658769
8.53047e-53	0.656235	0.87	0.383	2.0027e-48	PGC	TXNDC12	0.656235
8.92873e-53	0.477726	1	0.968	2.0962e-48	PGC	RPL5	0.477726
3.42128e-51	0.525377	1	0.971	8.03215e-47	PGC	RPSA	0.525377
4.12164e-51	0.561925	0.84	0.381	9.67639e-47	PGC	RMND1	0.561925
4.41018e-51	0.463377	1	0.98	1.03538e-46	PGC	RPLP0	0.463377
1.59507e-50	0.739053	0.815	0.411	3.74476e-46	PGC	CFLAR	0.739053
4.16875e-50	0.682559	0.76	0.253	9.78697e-46	PGC	PIM2	0.682559
1.04736e-49	0.622315	0.575	0.108	2.45888e-45	PGC	TUBB4A	0.622315
2.71961e-49	0.622498	0.98	0.767	6.38483e-45	PGC	RPL23	0.622498
3.63707e-49	0.715517	0.945	0.652	8.53875e-45	PGC	MLEC	0.715517
4.24564e-49	0.542245	1	0.97	9.96749e-45	PGC	RPL8	0.542245
9.17691e-49	0.870503	0.84	0.401	2.15446e-44	PGC	MEG3	0.870503
1.23174e-48	-1.38492	0.13	0.588	2.89177e-44	PGC	B2M	-1.38492
1.49584e-48	0.714921	0.86	0.268	3.51177e-44	PGC	TPM4	0.714921
3.38816e-48	0.620155	0.79	0.323	7.95438e-44	PGC	DPPA4	0.620155
3.8371e-48	0.691648	0.75	0.333	9.00837e-44	PGC	SPANXA2-OT1	0.691648
8.37768e-48	0.43573	0.61	0.113	1.96683e-43	PGC	ST6GALNAC1	0.43573
4.01002e-47	0.622742	0.965	0.792	9.41431e-43	PGC	EIF3K	0.622742
2.44261e-46	0.586097	0.875	0.412	5.7345e-42	PGC	UPP1	0.586097
2.37639e-45	0.590372	0.995	0.917	5.57906e-41	PGC	RPS2	0.590372
4.54428e-45	0.529372	0.71	0.227	1.06686e-40	PGC	KLRG2	0.529372
1.56869e-44	0.690658	0.92	0.467	3.68282e-40	PGC	TMSB4X	0.690658
6.31962e-44	0.475731	1	0.948	1.48366e-39	PGC	RPS25	0.475731
8.43961e-44	0.618357	0.87	0.33	1.98137e-39	PGC	ETV5	0.618357
8.78282e-44	-1.04857	0.865	0.909	2.06194e-39	PGC	CKS2	-1.04857
4.12513e-43	0.646473	0.79	0.248	9.68456e-39	PGC	THY1	0.646473
8.79086e-43	0.473245	1	0.935	2.06383e-38	PGC	RPL18A	0.473245
1.46137e-42	0.46752	1	0.921	3.43085e-38	PGC	NACA	0.46752
2.70119e-42	0.535665	0.865	0.405	6.34157e-38	PGC	SOX17	0.535665
3.04632e-42	0.518255	0.775	0.237	7.15184e-38	PGC	PHLDA3	0.518255
1.64385e-41	-1.54035	0.075	0.516	3.85927e-37	PGC	PAGE2B	-1.54035
3.62056e-41	0.587067	0.83	0.358	8.49998e-37	PGC	VAMP8	0.587067
4.2726e-41	-0.74986	0.05	0.468	1.00308e-36	PGC	BAZ1A	-0.74986
4.88223e-41	0.571904	0.98	0.802	1.1462e-36	PGC	LDHB	0.571904
4.91538e-41	0.631555	0.905	0.583	1.15398e-36	PGC	CD9	0.631555
4.97854e-41	0.51415	0.745	0.263	1.16881e-36	PGC	JUP	0.51415
5.48679e-41	-0.902291	0.04	0.466	1.28813e-36	PGC	SLC25A31	-0.902291
6.5416e-41	0.58794	0.935	0.629	1.53577e-36	PGC	LY6E	0.58794
7.65452e-41	-0.91076	0.97	0.955	1.79705e-36	PGC	HMGB1	-0.91076
1.06173e-40	0.588659	0.87	0.456	2.49263e-36	PGC	SLC3A2	0.588659
2.15738e-40	-1.26457	0.16	0.592	5.06489e-36	PGC	HIST1H2AA	-1.26457
2.31032e-40	0.602443	0.885	0.452	5.42393e-36	PGC	BAX	0.602443
3.13717e-40	0.53945	0.72	0.252	7.36514e-36	PGC	PPP1R14C	0.53945
3.97125e-40	0.43612	1	0.978	9.32331e-36	PGC	RPL32	0.43612
7.93659e-40	0.489931	0.985	0.918	1.86327e-35	PGC	FAU	0.489931
9.04476e-40	0.337788	0.525	0.116	2.12344e-35	PGC	CYP2S1	0.337788
1.1628e-39	0.54761	0.84	0.439	2.7299e-35	PGC	BFAR	0.54761
1.48252e-39	0.620409	0.925	0.586	3.48051e-35	PGC	CD63	0.620409
1.86367e-39	-1.28845	0.695	0.837	4.37534e-35	PGC	SMS	-1.28845
2.86924e-39	0.521007	0.73	0.204	6.73611e-35	PGC	TENT5B	0.521007
7.71566e-39	-0.712861	0.145	0.563	1.81141e-34	PGC	RNASEH2B	-0.712861
1.22472e-38	0.430386	0.66	0.182	2.87528e-34	PGC	ABHD14B	0.430386
3.84899e-38	0.43895	0.995	0.943	9.03627e-34	PGC	RPL9	0.43895
4.11825e-38	0.473847	0.99	0.922	9.66842e-34	PGC	EEF1B2	0.473847
5.25509e-38	0.537819	0.66	0.228	1.23374e-33	PGC	GIP	0.537819
6.45226e-38	0.445586	0.665	0.203	1.5148e-33	PGC	TFAP2C	0.445586
7.15782e-38	0.568746	0.895	0.617	1.68044e-33	PGC	APRT	0.568746
8.97803e-38	0.594772	0.935	0.566	2.10777e-33	PGC	TXN	0.594772
9.14259e-38	0.513701	0.93	0.625	2.14641e-33	PGC	MRPL57	0.513701
1.4564e-37	0.575142	0.76	0.352	3.4192e-33	PGC	IGFBP6	0.575142
1.54478e-37	0.634534	0.725	0.319	3.62669e-33	PGC	PYY	0.634534
1.78452e-37	0.498989	0.645	0.201	4.18952e-33	PGC	PLTP	0.498989
2.83314e-37	-1.02892	0.165	0.567	6.65136e-33	PGC	COX8C	-1.02892
5.74358e-37	-0.906868	0.445	0.726	1.34842e-32	PGC	DDX4	-0.906868
9.18275e-37	0.548684	0.93	0.581	2.15583e-32	PGC	RNPEP	0.548684
1.46243e-36	0.56123	0.835	0.417	3.43335e-32	PGC	SPTSSA	0.56123
1.48873e-36	0.621516	0.94	0.77	3.4951e-32	PGC	TMED9	0.621516
1.73665e-36	0.37488	0.49	0.096	4.07713e-32	PGC	FOXH1	0.37488
1.75677e-36	0.534637	0.975	0.912	4.12438e-32	PGC	RPL10A	0.534637
1.90806e-36	0.590634	0.975	0.781	4.47955e-32	PGC	MIF	0.590634
2.19996e-36	0.420964	1	0.963	5.16485e-32	PGC	RPL29	0.420964
3.31949e-36	-1.5769	0.875	0.898	7.79317e-32	PGC	MT-ND1	-1.5769
3.73993e-36	0.507356	0.775	0.301	8.78022e-32	PGC	KLF4	0.507356
4.67772e-36	-0.565812	0.09	0.503	1.09819e-31	PGC	ASPM	-0.565812
6.74367e-36	-0.839456	0.31	0.623	1.58321e-31	PGC	SCCPDH	-0.839456
6.75727e-36	0.469896	0.99	0.838	1.5864e-31	PGC	UQCRH	0.469896
6.9265e-36	0.433715	0.71	0.253	1.62613e-31	PGC	GPRC5C	0.433715
7.41546e-36	0.552517	0.975	0.732	1.74093e-31	PGC	MYL6	0.552517
3.86759e-35	-0.911957	0.105	0.482	9.07995e-31	PGC	STAG3	-0.911957
6.5064e-35	0.395621	1	0.95	1.52751e-30	PGC	RPL36	0.395621
7.38736e-35	-1.2157	0.79	0.866	1.73433e-30	PGC	TEX30	-1.2157
8.18215e-35	0.518982	0.95	0.675	1.92092e-30	PGC	NDUFS5	0.518982
1.7632e-34	0.586187	1	0.938	4.13947e-30	PGC	RPS26	0.586187
3.60152e-34	0.572025	0.925	0.613	8.45528e-30	PGC	SDCBP	0.572025
3.78485e-34	0.4849	0.985	0.855	8.88568e-30	PGC	RPL27	0.4849
3.87206e-34	0.927246	0.61	0.197	9.09043e-30	PGC	KHDC3L	0.927246
5.2836e-34	0.484825	0.725	0.297	1.24043e-29	PGC	GMPR	0.484825
5.74977e-34	0.445753	0.715	0.311	1.34987e-29	PGC	EFEMP1	0.445753
6.43839e-34	0.436442	0.775	0.288	1.51154e-29	PGC	STOM	0.436442
1.76824e-33	0.372906	0.58	0.162	4.15129e-29	PGC	SLC43A1	0.372906
2.07719e-33	0.44784	0.99	0.901	4.87661e-29	PGC	HNRNPA1	0.44784
2.36922e-33	0.478339	0.985	0.809	5.56222e-29	PGC	S100A10	0.478339
2.86735e-33	-0.666448	0.02	0.374	6.73168e-29	PGC	TEX15	-0.666448
1.26251e-32	-0.90086	0.155	0.521	2.96399e-28	PGC	TUBA3D	-0.90086
1.66001e-32	-0.691307	0.005	0.339	3.89721e-28	PGC	CCDC73	-0.691307
2.90624e-32	0.417954	0.625	0.199	6.82298e-28	PGC	GABARAPL1	0.417954
3.13593e-32	-1.07128	0.37	0.642	7.36222e-28	PGC	CENPU	-1.07128
1.13467e-31	0.568127	0.87	0.499	2.66385e-27	PGC	TCL1A	0.568127
1.49837e-31	-0.802005	0.19	0.532	3.51772e-27	PGC	NMU	-0.802005
2.10895e-31	0.434008	0.785	0.399	4.95118e-27	PGC	COA4	0.434008
2.62736e-31	0.421401	0.785	0.4	6.16824e-27	PGC	UNC119	0.421401
4.49236e-31	0.415478	0.665	0.212	1.05467e-26	PGC	NFE2L3	0.415478
5.00042e-31	-1.34457	0.99	0.973	1.17395e-26	PGC	MT-ND4L	-1.34457
5.08046e-31	0.424936	0.625	0.265	1.19274e-26	PGC	ABRACL	0.424936
5.96914e-31	0.410405	0.995	0.927	1.40137e-26	PGC	RPS16	0.410405
6.39733e-31	0.515197	0.97	0.761	1.5019e-26	PGC	PGAM1	0.515197
8.80772e-31	0.440964	0.99	0.863	2.06779e-26	PGC	RPL13A	0.440964
1.1099e-30	0.370938	0.54	0.179	2.60572e-26	PGC	SCG5	0.370938
1.11879e-30	-0.98123	0.76	0.837	2.62657e-26	PGC	KPNA2	-0.98123
1.61918e-30	-0.980464	0.59	0.763	3.80136e-26	PGC	FKBP2	-0.980464
2.02392e-30	0.440308	0.705	0.299	4.75155e-26	PGC	HILPDA	0.440308
2.12479e-30	0.489198	0.92	0.646	4.98836e-26	PGC	APEX1	0.489198
2.72233e-30	-0.797718	0.415	0.723	6.39122e-26	PGC	RBBP7	-0.797718
3.93918e-30	-0.542127	0.045	0.399	9.24802e-26	PGC	NPB	-0.542127
5.11493e-30	0.581901	0.715	0.268	1.20083e-25	PGC	SFRP2	0.581901
6.43537e-30	0.325858	0.54	0.159	1.51083e-25	PGC	VSIG10	0.325858
7.18501e-30	0.45209	0.995	0.878	1.68683e-25	PGC	RPL7	0.45209
1.0038e-29	0.428304	0.795	0.443	2.35662e-25	PGC	RRP9	0.428304
1.05922e-29	-0.569614	0.01	0.323	2.48673e-25	PGC	RBP4	-0.569614
1.15571e-29	0.413505	0.695	0.259	2.71325e-25	PGC	TFCP2L1	0.413505
1.19749e-29	0.555521	0.955	0.761	2.81134e-25	PGC	TMSB10	0.555521
1.50881e-29	0.49165	0.87	0.55	3.54223e-25	PGC	NOP10	0.49165
1.55362e-29	0.620695	0.965	0.834	3.64743e-25	PGC	RPL26	0.620695
1.55528e-29	0.448689	0.89	0.561	3.65134e-25	PGC	RPUSD3	0.448689
1.74704e-29	0.235884	0.375	0.062	4.10152e-25	PGC	ARRB1	0.235884
1.89834e-29	-0.642388	0.035	0.375	4.45674e-25	PGC	DMRTB1	-0.642388
1.99435e-29	0.36345	0.625	0.177	4.68213e-25	PGC	SLC25A16	0.36345
2.82104e-29	-1.16442	0.015	0.332	6.62295e-25	PGC	PAGE2	-1.16442
3.91214e-29	0.312547	1	0.968	9.18453e-25	PGC	RPL15	0.312547
4.49695e-29	0.368801	0.995	0.907	1.05575e-24	PGC	RPL35	0.368801
5.34662e-29	0.393275	0.765	0.346	1.25523e-24	PGC	TEAD4	0.393275
5.58113e-29	-0.665719	0.055	0.418	1.31028e-24	PGC	ESX1	-0.665719
7.57997e-29	0.443425	0.875	0.511	1.77955e-24	PGC	IMP3	0.443425
7.79602e-29	0.357984	0.675	0.275	1.83027e-24	PGC	HUS1	0.357984
1.02252e-28	-1.395	0.96	0.929	2.40058e-24	PGC	MT-ND3	-1.395
1.39462e-28	0.55218	0.86	0.593	3.27415e-24	PGC	DCXR	0.55218
1.46077e-28	0.371362	0.63	0.244	3.42944e-24	PGC	PLOD1	0.371362
1.57066e-28	-1.24904	0.815	0.846	3.68745e-24	PGC	MT-ND2	-1.24904
1.74363e-28	-0.677101	0.065	0.382	4.09352e-24	PGC	DERL3	-0.677101
2.2469e-28	0.26988	0.405	0.084	5.27505e-24	PGC	FAM124B	0.26988
2.80232e-28	0.297155	0.45	0.091	6.579e-24	PGC	PLAU	0.297155
3.33339e-28	-0.743102	0.46	0.689	7.82581e-24	PGC	WASF1	-0.743102
3.93648e-28	0.546361	0.975	0.73	9.24167e-24	PGC	RPL36A	0.546361
4.52229e-28	0.234869	0.355	0.068	1.0617e-23	PGC	AC106864.2	0.234869
6.07144e-28	-0.858666	0.125	0.447	1.42539e-23	PGC	HORMAD1	-0.858666
6.10541e-28	0.413462	0.675	0.279	1.43337e-23	PGC	ELOVL6	0.413462
6.29974e-28	0.49994	0.88	0.589	1.47899e-23	PGC	PIN4	0.49994
6.47897e-28	-0.510555	0.14	0.5	1.52107e-23	PGC	TACC3	-0.510555
7.07203e-28	0.300321	1	0.988	1.6603e-23	PGC	RPS27A	0.300321
7.23208e-28	-0.975006	0.215	0.535	1.69788e-23	PGC	ID3	-0.975006
7.91365e-28	0.278751	0.465	0.117	1.85789e-23	PGC	FKBP11	0.278751
8.06546e-28	0.319471	0.515	0.148	1.89353e-23	PGC	TJP3	0.319471
8.75657e-28	0.464015	0.9	0.566	2.05578e-23	PGC	CRTAP	0.464015
1.48311e-27	0.286299	0.53	0.187	3.48189e-23	PGC	PLPP5	0.286299
1.77499e-27	-0.958794	0.565	0.746	4.16714e-23	PGC	ZCWPW1	-0.958794
1.85333e-27	-0.91503	0.095	0.435	4.35107e-23	PGC	SYCP2	-0.91503
2.06817e-27	-0.82109	0.885	0.893	4.85543e-23	PGC	HMGN2	-0.82109
2.14665e-27	-0.68748	0.335	0.617	5.0397e-23	PGC	UBLCP1	-0.68748
2.21036e-27	-0.902559	0.135	0.479	5.18927e-23	PGC	C5orf47	-0.902559
2.53967e-27	-0.44869	0.015	0.321	5.96239e-23	PGC	HSF2BP	-0.44869
2.62102e-27	-0.791779	0.115	0.451	6.15337e-23	PGC	DPEP3	-0.791779
3.48009e-27	-0.420936	0	0.273	8.17021e-23	PGC	PAX6	-0.420936
3.68518e-27	0.296821	0.465	0.117	8.65171e-23	PGC	GDPD2	0.296821
4.19902e-27	0.36416	0.995	0.954	9.85803e-23	PGC	RPL37A	0.36416
4.2622e-27	0.39166	0.735	0.352	1.00064e-22	PGC	SCPEP1	0.39166
4.78335e-27	0.323137	1	0.974	1.12299e-22	PGC	RPS6	0.323137
5.28507e-27	0.520476	0.955	0.823	1.24077e-22	PGC	LAPTM4A	0.520476
8.45239e-27	0.444062	0.975	0.657	1.98437e-22	PGC	TPM2	0.444062
9.39439e-27	0.418346	0.955	0.697	2.20552e-22	PGC	PHB2	0.418346
1.04171e-26	0.443236	0.9	0.584	2.44563e-22	PGC	TAF1D	0.443236
1.6331e-26	-0.742441	0.3	0.573	3.83402e-22	PGC	BAIAP2L1	-0.742441
1.96943e-26	0.373794	0.63	0.242	4.62364e-22	PGC	PIP5K1B	0.373794
2.03407e-26	0.242331	0.445	0.11	4.77539e-22	PGC	CDC42EP4	0.242331
2.0978e-26	-0.531709	0.165	0.502	4.925e-22	PGC	CTSF	-0.531709
2.47773e-26	-0.747049	0.255	0.568	5.81696e-22	PGC	TOP2A	-0.747049
2.99498e-26	-0.852791	0.275	0.542	7.03132e-22	PGC	TSPYL2	-0.852791
3.09902e-26	0.402366	0.86	0.512	7.27556e-22	PGC	MRPL17	0.402366
3.93696e-26	-0.750378	0.475	0.689	9.24279e-22	PGC	HSF2	-0.750378
4.22645e-26	-0.811973	0.445	0.691	9.92244e-22	PGC	MAEL	-0.811973
7.14032e-26	-1.35682	0.785	0.852	1.67633e-21	PGC	MT-ATP8	-1.35682
7.32893e-26	0.474931	0.85	0.54	1.72061e-21	PGC	CCPG1	0.474931
7.34475e-26	0.455256	0.985	0.927	1.72433e-21	PGC	EEF2	0.455256
8.31981e-26	0.267739	0.465	0.119	1.95324e-21	PGC	SLC47A1	0.267739
8.79471e-26	0.446474	0.81	0.508	2.06473e-21	PGC	EXOSC5	0.446474
9.24739e-26	0.439556	0.825	0.447	2.17101e-21	PGC	CCND2	0.439556
9.79611e-26	0.322626	0.545	0.209	2.29983e-21	PGC	PYCARD	0.322626
1.11373e-25	0.34728	1	0.926	2.61471e-21	PGC	RPL23A	0.34728
1.17215e-25	-0.898339	0.165	0.479	2.75187e-21	PGC	REXO5	-0.898339
1.62049e-25	-0.8831	0.74	0.819	3.80442e-21	PGC	PSMD10	-0.8831
1.71693e-25	-0.728797	0.4	0.657	4.03083e-21	PGC	KNL1	-0.728797
1.78303e-25	0.4148	0.96	0.743	4.18601e-21	PGC	PEBP1	0.4148
1.96688e-25	-0.872731	0.935	0.907	4.61765e-21	PGC	TUBB4B	-0.872731
2.01764e-25	0.323328	0.995	0.948	4.73682e-21	PGC	RPLP2	0.323328
2.21696e-25	-0.904795	0.12	0.427	5.20476e-21	PGC	INCA1	-0.904795
4.1389e-25	0.380216	0.635	0.292	9.7169e-21	PGC	ARPC1B	0.380216
4.38798e-25	-1.27497	0.685	0.781	1.03017e-20	PGC	SYCP3	-1.27497
4.40279e-25	0.338534	0.63	0.214	1.03364e-20	PGC	RAB3B	0.338534
4.573e-25	0.433671	0.855	0.558	1.0736e-20	PGC	EIF3I	0.433671
5.53735e-25	0.28215	0.535	0.132	1.3e-20	PGC	PNP	0.28215
5.83181e-25	-0.492067	0.11	0.422	1.36914e-20	PGC	FAM133A	-0.492067
6.11873e-25	0.316565	1	0.963	1.43649e-20	PGC	RPS15	0.316565
1.05797e-24	0.433235	0.85	0.507	2.48379e-20	PGC	ANP32A	0.433235
1.80739e-24	0.344862	0.68	0.348	4.2432e-20	PGC	ETHE1	0.344862
1.865e-24	0.230481	0.375	0.068	4.37847e-20	PGC	ATP6V1B1	0.230481
1.92219e-24	0.351184	0.995	0.958	4.51272e-20	PGC	TPT1	0.351184
2.59477e-24	0.28442	1	0.971	6.09175e-20	PGC	RPS5	0.28442
2.99043e-24	-1.14025	0.965	0.937	7.02063e-20	PGC	MT-ATP6	-1.14025
4.41944e-24	-0.696768	0.14	0.482	1.03755e-19	PGC	CDC20	-0.696768
4.58537e-24	0.420426	0.85	0.508	1.07651e-19	PGC	GSN	0.420426
4.60876e-24	0.439172	0.77	0.375	1.082e-19	PGC	SERPINH1	0.439172
4.71207e-24	-0.453678	0.14	0.442	1.10625e-19	PGC	FAM83D	-0.453678
5.30822e-24	-0.596113	0.04	0.344	1.24621e-19	PGC	TDRD1	-0.596113
5.39289e-24	-0.717527	0.35	0.612	1.26609e-19	PGC	CRNDE	-0.717527
7.51633e-24	0.328824	0.99	0.975	1.76461e-19	PGC	RPL13	0.328824
9.42956e-24	-0.548401	0.155	0.503	2.21378e-19	PGC	ESCO2	-0.548401
9.92277e-24	0.437091	0.335	0.068	2.32957e-19	PGC	ALPG	0.437091
1.02932e-23	0.392386	0.93	0.733	2.41654e-19	PGC	SNRPE	0.392386
1.17264e-23	-0.453045	0.03	0.327	2.753e-19	PGC	FKBP6	-0.453045
1.31815e-23	0.320699	1	0.989	3.09462e-19	PGC	RPS12	0.320699
1.34773e-23	0.507964	0.94	0.756	3.16407e-19	PGC	ENO1	0.507964
1.38576e-23	0.427205	0.94	0.677	3.25335e-19	PGC	TKT	0.427205
1.59216e-23	-0.951965	0.88	0.909	3.73792e-19	PGC	BUD23	-0.951965
1.67025e-23	0.409998	0.89	0.562	3.92124e-19	PGC	RNF181	0.409998
2.23003e-23	-0.80399	0.7	0.794	5.23545e-19	PGC	DUT	-0.80399
2.87028e-23	-0.95744	0.3	0.552	6.73856e-19	PGC	GNAS	-0.95744
2.89498e-23	-0.522799	0.005	0.259	6.79655e-19	PGC	FTCD	-0.522799
2.93305e-23	0.411108	0.845	0.524	6.88592e-19	PGC	MMP24OS	0.411108
3.71571e-23	0.408934	0.76	0.43	8.72337e-19	PGC	ZYX	0.408934
3.88463e-23	0.31624	0.625	0.235	9.11995e-19	PGC	WNT2B	0.31624
4.20822e-23	0.364366	0.975	0.832	9.87963e-19	PGC	EIF3H	0.364366
4.35216e-23	0.45565	0.89	0.624	1.02176e-18	PGC	LAPTM4B	0.45565
5.30854e-23	0.408689	0.29	0.064	1.24629e-18	PGC	LINC01356	0.408689
5.33094e-23	-0.73389	0.355	0.578	1.25154e-18	PGC	LIN7B	-0.73389
5.62598e-23	-0.725158	0.7	0.78	1.32081e-18	PGC	SMC4	-0.725158
6.46866e-23	-0.632815	0.365	0.612	1.51865e-18	PGC	CFL2	-0.632815
6.62024e-23	0.393606	0.855	0.544	1.55423e-18	PGC	MRPL15	0.393606
1.00673e-22	0.662986	0.66	0.235	2.36349e-18	PGC	ACTG2	0.662986
1.26831e-22	0.426136	0.985	0.889	2.97762e-18	PGC	RPS29	0.426136
1.78054e-22	-0.810095	0.05	0.312	4.18018e-18	PGC	LY6K	-0.810095
1.98383e-22	-0.376597	0	0.228	4.65743e-18	PGC	AC090627.1	-0.376597
1.99939e-22	0.35512	0.985	0.938	4.69396e-18	PGC	NPM1	0.35512
2.04378e-22	-0.633161	0.505	0.671	4.79818e-18	PGC	WDR34	-0.633161
2.08323e-22	-0.857736	0.935	0.947	4.89081e-18	PGC	ATP5F1E	-0.857736
2.7164e-22	-0.442364	0.08	0.373	6.37729e-18	PGC	DLK1	-0.442364
2.91482e-22	-0.733164	0.41	0.65	6.84313e-18	PGC	USP11	-0.733164
3.05232e-22	-0.439656	0.19	0.487	7.16594e-18	PGC	CDCA2	-0.439656
3.31396e-22	-0.415325	0.02	0.272	7.78019e-18	PGC	GCNA	-0.415325
3.53807e-22	-0.48667	0.18	0.54	8.30634e-18	PGC	NCAPH	-0.48667
3.64907e-22	0.349063	0.97	0.884	8.56693e-18	PGC	COX7C	0.349063
3.8997e-22	0.366777	0.685	0.346	9.15532e-18	PGC	RPRM	0.366777
4.00362e-22	0.27227	0.465	0.148	9.3993e-18	PGC	CDC42EP1	0.27227
4.61626e-22	0.297966	0.52	0.179	1.08376e-17	PGC	GLDC	0.297966
4.81238e-22	0.286597	0.46	0.122	1.1298e-17	PGC	TMEM51	0.286597
5.9402e-22	0.45555	0.77	0.353	1.39458e-17	PGC	TCL1B	0.45555
6.44495e-22	0.3443	0.975	0.864	1.51308e-17	PGC	BTF3	0.3443
7.68737e-22	0.386181	0.815	0.481	1.80476e-17	PGC	XBP1	0.386181
7.94326e-22	-1.03372	0.95	0.922	1.86484e-17	PGC	MT-ND4	-1.03372
8.1597e-22	-0.535964	0.045	0.312	1.91565e-17	PGC	PSMA8	-0.535964
8.72321e-22	0.288165	0.455	0.128	2.04795e-17	PGC	FABP3	0.288165
8.83687e-22	0.340527	0.965	0.788	2.07463e-17	PGC	ZNF428	0.340527
9.00311e-22	0.298572	0.455	0.117	2.11366e-17	PGC	ANXA3	0.298572
9.03268e-22	0.301766	0.52	0.222	2.1206e-17	PGC	LPCAT4	0.301766
9.69597e-22	0.248652	0.405	0.099	2.27632e-17	PGC	LARGE2	0.248652
1.05438e-21	-0.574184	0.52	0.703	2.47536e-17	PGC	MND1	-0.574184
1.08669e-21	-0.794563	0.79	0.816	2.55121e-17	PGC	SLBP	-0.794563
1.10771e-21	-0.9175	0.31	0.488	2.60057e-17	PGC	ANHX	-0.9175
1.14547e-21	0.3709	0.83	0.532	2.68921e-17	PGC	ASRGL1	0.3709
1.2584e-21	0.400959	0.95	0.776	2.95435e-17	PGC	TMED10	0.400959
1.41455e-21	0.347885	1	0.976	3.32094e-17	PGC	RPL10	0.347885
1.47479e-21	0.306267	0.99	0.925	3.46235e-17	PGC	RPL4	0.306267
1.84307e-21	0.298107	0.58	0.223	4.32696e-17	PGC	ENC1	0.298107
1.92406e-21	0.378454	0.895	0.574	4.51712e-17	PGC	PSMB4	0.378454
1.93009e-21	0.279172	0.465	0.133	4.53128e-17	PGC	CDO1	0.279172
2.12233e-21	0.195325	0.315	0.062	4.9826e-17	PGC	IL12B	0.195325
2.34921e-21	0.296991	0.395	0.112	5.51524e-17	PGC	PNMT	0.296991
2.44445e-21	0.375301	0.74	0.439	5.73885e-17	PGC	BIN1	0.375301
2.82576e-21	0.360173	1	0.938	6.63404e-17	PGC	RPS27	0.360173
3.22758e-21	-0.659547	0.305	0.552	7.57739e-17	PGC	MAD2L1	-0.659547
3.47989e-21	0.417517	0.855	0.504	8.16973e-17	PGC	AKAP12	0.417517
3.83993e-21	0.330454	0.98	0.826	9.01499e-17	PGC	ARPC3	0.330454
3.93328e-21	-1.03843	0.91	0.902	9.23417e-17	PGC	MT-ND5	-1.03843
4.11625e-21	0.688344	0.745	0.442	9.66372e-17	PGC	CD81	0.688344
4.43323e-21	0.259787	0.54	0.198	1.04079e-16	PGC	TEAD2	0.259787
4.61051e-21	0.393333	0.845	0.603	1.08241e-16	PGC	SHISA5	0.393333
5.16963e-21	0.337866	0.655	0.292	1.21367e-16	PGC	MYADM	0.337866
5.79106e-21	0.392769	0.875	0.614	1.35957e-16	PGC	CAP1	0.392769
6.4797e-21	-0.657097	0.475	0.656	1.52124e-16	PGC	TCEAL4	-0.657097
6.57746e-21	0.309048	0.525	0.211	1.54419e-16	PGC	SUSD3	0.309048
7.19302e-21	-0.578343	0.45	0.651	1.6887e-16	PGC	GMPS	-0.578343
7.68995e-21	-0.384713	0.02	0.279	1.80537e-16	PGC	TCP11	-0.384713
8.37198e-21	0.343623	0.99	0.876	1.96549e-16	PGC	PRDX1	0.343623
9.08471e-21	0.147082	0.255	0.039	2.13282e-16	PGC	DLGAP1-AS2	0.147082
9.15775e-21	0.217719	0.33	0.078	2.14996e-16	PGC	PXDNL	0.217719
9.95874e-21	-0.640882	0.45	0.659	2.33801e-16	PGC	VRK1	-0.640882
1.02414e-20	-0.674764	0.345	0.58	2.40437e-16	PGC	GINS2	-0.674764
1.05813e-20	-0.514065	0.21	0.489	2.48416e-16	PGC	NT5DC2	-0.514065
1.08569e-20	0.243548	0.495	0.161	2.54886e-16	PGC	NAGA	0.243548
1.09555e-20	0.33363	0.585	0.238	2.57202e-16	PGC	TUBB3	0.33363
1.12536e-20	0.27317	1	0.971	2.642e-16	PGC	RPL6	0.27317
1.12975e-20	-0.407547	0.06	0.347	2.65231e-16	PGC	YY2	-0.407547
1.15554e-20	-0.641466	0.595	0.737	2.71285e-16	PGC	RBBP8	-0.641466
1.1612e-20	-0.526057	0.175	0.467	2.72614e-16	PGC	SYCE1	-0.526057
1.35208e-20	0.360589	0.93	0.657	3.17427e-16	PGC	COX8A	0.360589
1.80199e-20	-0.679846	0.05	0.293	4.23052e-16	PGC	C14orf39	-0.679846
1.8585e-20	0.306234	0.81	0.409	4.3632e-16	PGC	TOR3A	0.306234
1.87684e-20	-0.671367	0.43	0.636	4.40626e-16	PGC	CXorf67	-0.671367
2.14547e-20	-0.500024	0.015	0.266	5.03693e-16	PGC	ALDH1A2	-0.500024
2.23679e-20	-0.528926	0.095	0.351	5.25131e-16	PGC	ZGLP1	-0.528926
2.90865e-20	0.380788	0.925	0.653	6.82864e-16	PGC	TPM3	0.380788
2.92112e-20	0.184186	0.38	0.087	6.85792e-16	PGC	CLDN6	0.184186
3.14621e-20	-0.439087	0.19	0.46	7.38637e-16	PGC	DTD1	-0.439087
3.56615e-20	0.330164	0.77	0.459	8.37226e-16	PGC	SRD5A3	0.330164
3.5834e-20	-0.507938	0.025	0.282	8.41275e-16	PGC	MRVI1-AS1	-0.507938
3.88408e-20	-0.759118	0.14	0.417	9.11866e-16	PGC	CDKN2D	-0.759118
4.27939e-20	-0.732615	0.535	0.698	1.00467e-15	PGC	OSBPL8	-0.732615
4.4184e-20	0.239628	0.335	0.12	1.03731e-15	PGC	CD52	0.239628
4.87233e-20	0.35736	0.855	0.57	1.14388e-15	PGC	MRPS18B	0.35736
5.18882e-20	-0.826601	0.09	0.348	1.21818e-15	PGC	C15orf48	-0.826601
6.35269e-20	-0.454506	0.055	0.302	1.49142e-15	PGC	ADAD1	-0.454506
6.40795e-20	-0.982523	0.045	0.289	1.50439e-15	PGC	SPATA22	-0.982523
8.73956e-20	0.361065	0.855	0.558	2.05179e-15	PGC	CSTB	0.361065
9.66623e-20	0.305882	0.985	0.843	2.26934e-15	PGC	SNRPD2	0.305882
1.09357e-19	-0.266569	0.005	0.236	2.56737e-15	PGC	FST	-0.266569
1.10882e-19	0.339204	0.92	0.707	2.60317e-15	PGC	POLR1D	0.339204
1.21965e-19	-0.7131	0	0.201	2.86337e-15	PGC	SPO11	-0.7131
1.44988e-19	0.350215	0.72	0.398	3.40389e-15	PGC	ABHD16A	0.350215
1.54208e-19	-0.599137	0.365	0.59	3.62035e-15	PGC	CAPRIN2	-0.599137
1.56991e-19	0.168677	0.265	0.038	3.68569e-15	PGC	PRELP	0.168677
2.0013e-19	0.227443	0.29	0.058	4.69844e-15	PGC	GPX2	0.227443
2.11984e-19	0.136969	0.215	0.032	4.97674e-15	PGC	LINC02452	0.136969
2.12787e-19	0.408535	0.935	0.795	4.9956e-15	PGC	PSAP	0.408535
2.67275e-19	-0.633806	0.53	0.667	6.27481e-15	PGC	RBM46	-0.633806
2.80996e-19	-0.386082	0.115	0.39	6.59695e-15	PGC	HJURP	-0.386082
2.97048e-19	0.336299	0.91	0.706	6.9738e-15	PGC	EIF3E	0.336299
2.97633e-19	-0.551738	0.33	0.556	6.98754e-15	PGC	ANXA11	-0.551738
3.02923e-19	0.254253	0.435	0.103	7.11172e-15	PGC	TRAF3IP2	0.254253
3.3968e-19	0.276602	0.435	0.102	7.97467e-15	PGC	C19orf85	0.276602
3.63382e-19	0.321825	0.61	0.293	8.53111e-15	PGC	SLC35A5	0.321825
4.44471e-19	0.247087	0.53	0.182	1.04348e-14	PGC	GRAMD1A	0.247087
4.61804e-19	-0.780141	0.765	0.802	1.08418e-14	PGC	C4orf48	-0.780141
4.85941e-19	0.277288	0.605	0.302	1.14084e-14	PGC	CCDC85B	0.277288
5.24119e-19	-0.889264	0.47	0.613	1.23047e-14	PGC	IQCB1	-0.889264
5.32587e-19	0.340601	0.98	0.863	1.25035e-14	PGC	HINT1	0.340601
5.43673e-19	-0.295597	0.03	0.277	1.27638e-14	PGC	SIX1	-0.295597
5.6431e-19	-0.418135	0.13	0.381	1.32483e-14	PGC	FAM50B	-0.418135
5.73413e-19	-0.625278	0.745	0.792	1.3462e-14	PGC	RALY	-0.625278
5.92072e-19	0.301476	0.705	0.389	1.39001e-14	PGC	NOP16	0.301476
6.02692e-19	0.192403	0.335	0.081	1.41494e-14	PGC	PTHLH	0.192403
6.06771e-19	-0.33788	0.1	0.378	1.42452e-14	PGC	KIF2C	-0.33788
6.86192e-19	-0.452065	0.235	0.494	1.61097e-14	PGC	CDKN3	-0.452065
7.0801e-19	0.238229	0.445	0.151	1.66219e-14	PGC	WDR55	0.238229
7.53081e-19	-0.653079	0.46	0.647	1.76801e-14	PGC	FH	-0.653079
7.84563e-19	0.352905	0.85	0.505	1.84192e-14	PGC	CDCA7	0.352905
8.93463e-19	-0.616214	0.48	0.635	2.09758e-14	PGC	IMPACT	-0.616214
9.83684e-19	0.168338	0.3	0.058	2.3094e-14	PGC	RASSF2	0.168338
9.96211e-19	-0.558346	0.225	0.486	2.3388e-14	PGC	SCML2	-0.558346
1.00099e-18	0.315289	1	0.95	2.35002e-14	PGC	RPL3	0.315289
1.06568e-18	-0.484492	0.18	0.429	2.50189e-14	PGC	SERPINE2	-0.484492
1.0933e-18	0.343266	0.945	0.79	2.56674e-14	PGC	TOMM22	0.343266
1.18306e-18	-0.674608	0.14	0.404	2.77747e-14	PGC	MAGEB2	-0.674608
1.19916e-18	-0.545673	0.275	0.529	2.81527e-14	PGC	TPTE	-0.545673
1.21408e-18	-1.03331	0.99	0.962	2.8503e-14	PGC	MT-CYB	-1.03331
1.39639e-18	-0.472239	0.325	0.559	3.2783e-14	PGC	TPX2	-0.472239
1.47436e-18	-0.648925	0.47	0.637	3.46136e-14	PGC	EPN1	-0.648925
1.69777e-18	-0.702468	0.045	0.3	3.98586e-14	PGC	PAGE5	-0.702468
1.74403e-18	0.380279	0.48	0.162	4.09446e-14	PGC	FBLN5	0.380279
1.89481e-18	0.308209	0.765	0.472	4.44846e-14	PGC	KCNV2	0.308209
1.9455e-18	-0.774824	0.48	0.712	4.56745e-14	PGC	HPRT1	-0.774824
2.02433e-18	-0.955047	1	0.969	4.75252e-14	PGC	MT-CO3	-0.955047
2.07284e-18	0.310894	0.705	0.337	4.86641e-14	PGC	NUDT4	0.310894
2.15086e-18	-0.27553	0.015	0.23	5.04957e-14	PGC	EPB41L3	-0.27553
2.26753e-18	-0.49689	0.345	0.568	5.32348e-14	PGC	ATAD2	-0.49689
2.36363e-18	0.320424	0.96	0.824	5.5491e-14	PGC	C1QBP	0.320424
2.52719e-18	0.463453	0.79	0.465	5.93309e-14	PGC	VIM	0.463453
2.63377e-18	0.234674	0.475	0.178	6.1833e-14	PGC	ACADS	0.234674
2.79441e-18	0.327841	0.96	0.728	6.56044e-14	PGC	NDUFB4	0.327841
2.8455e-18	-0.329805	0.02	0.253	6.68037e-14	PGC	CCT6B	-0.329805
2.8509e-18	-0.704445	0.88	0.868	6.69307e-14	PGC	SMC3	-0.704445
2.98707e-18	-0.73374	0.7	0.797	7.01275e-14	PGC	PRAME	-0.73374
3.09814e-18	-0.692618	0.81	0.856	7.2735e-14	PGC	EIF1B	-0.692618
3.52137e-18	-0.531617	0.19	0.444	8.26712e-14	PGC	BAIAP2	-0.531617
3.78547e-18	-0.577121	0.33	0.546	8.88714e-14	PGC	TRIP13	-0.577121
4.03329e-18	-0.834383	0.365	0.557	9.46895e-14	PGC	ZFAND2A	-0.834383
4.09785e-18	-0.504244	0.29	0.53	9.62052e-14	PGC	ETFA	-0.504244
4.66973e-18	0.312939	0.87	0.604	1.09631e-13	PGC	UFC1	0.312939
4.83663e-18	0.19489	0.42	0.147	1.13549e-13	PGC	IL6R	0.19489
5.30595e-18	-0.669765	0.56	0.684	1.24568e-13	PGC	CCDC88A	-0.669765
5.96159e-18	0.328929	0.83	0.568	1.3996e-13	PGC	OXA1L	0.328929
6.06415e-18	0.281369	0.63	0.261	1.42368e-13	PGC	USP28	0.281369
6.10163e-18	0.238721	0.605	0.264	1.43248e-13	PGC	HDDC3	0.238721
6.34836e-18	-0.716167	0.005	0.2	1.4904e-13	PGC	SCML1	-0.716167
6.50991e-18	-0.797905	0.9	0.886	1.52833e-13	PGC	BCAP31	-0.797905
6.57862e-18	-0.1942	0	0.183	1.54446e-13	PGC	DLX5	-0.1942
7.25402e-18	0.350014	0.965	0.734	1.70303e-13	PGC	RBM3	0.350014
7.4419e-18	-0.5945	0.445	0.597	1.74713e-13	PGC	IFT57	-0.5945
7.84083e-18	0.340005	0.865	0.612	1.84079e-13	PGC	SEC63	0.340005
7.85927e-18	0.310888	0.81	0.496	1.84512e-13	PGC	MRPL34	0.310888
9.78076e-18	0.305664	0.665	0.329	2.29623e-13	PGC	ALDH7A1	0.305664
1.00476e-17	-0.779998	0.805	0.799	2.35888e-13	PGC	HMGB2	-0.779998
1.08299e-17	-0.639249	0.9	0.891	2.54253e-13	PGC	EIF5	-0.639249
1.09302e-17	0.36844	0.94	0.693	2.56609e-13	PGC	CTSL	0.36844
1.10637e-17	-0.582802	0.355	0.571	2.59743e-13	PGC	SUGP2	-0.582802
1.12323e-17	-0.50569	0.42	0.63	2.63702e-13	PGC	CENPK	-0.50569
1.19911e-17	-0.520269	0.01	0.202	2.81515e-13	PGC	DMRTC2	-0.520269
1.22181e-17	0.303089	0.68	0.353	2.86844e-13	PGC	PCMTD2	0.303089
1.23537e-17	0.313993	0.69	0.34	2.90027e-13	PGC	GLUD1	0.313993
1.24555e-17	0.376298	0.83	0.499	2.92419e-13	PGC	TMEM170A	0.376298
1.24613e-17	-0.374537	0.01	0.204	2.92554e-13	PGC	STRA8	-0.374537
1.33857e-17	0.326739	0.95	0.818	3.14256e-13	PGC	HNRNPF	0.326739
1.61351e-17	0.36187	0.825	0.515	3.78803e-13	PGC	PCYOX1	0.36187
1.64465e-17	0.3196	0.965	0.855	3.86115e-13	PGC	SEC61G	0.3196
1.68032e-17	0.293874	0.93	0.664	3.94488e-13	PGC	TOMM5	0.293874
1.74227e-17	-0.28888	0.06	0.305	4.09033e-13	PGC	FAM178B	-0.28888
1.80363e-17	-0.416315	0.005	0.205	4.23438e-13	PGC	MEIKIN	-0.416315
1.80404e-17	0.268362	0.555	0.228	4.23535e-13	PGC	SLC35A2	0.268362
1.80724e-17	-0.9898	1	0.976	4.24285e-13	PGC	MT-CO2	-0.9898
1.85793e-17	-1.21124	0.005	0.191	4.36186e-13	PGC	SYCP1	-1.21124
1.88693e-17	-0.623797	0.62	0.73	4.42996e-13	PGC	NUP93	-0.623797
1.92721e-17	-0.448921	0.195	0.44	4.52451e-13	PGC	SGO2	-0.448921
1.96036e-17	0.280483	0.435	0.13	4.60234e-13	PGC	MYCL	0.280483
1.97849e-17	0.197544	0.285	0.063	4.6449e-13	PGC	ZFP42	0.197544
1.99441e-17	0.0976736	0.23	0.029	4.68228e-13	PGC	AC005833.1	0.0976736
2.1149e-17	-0.503222	0.495	0.657	4.96514e-13	PGC	CKAP2	-0.503222
2.19105e-17	0.437614	0.925	0.729	5.14392e-13	PGC	BNIP3	0.437614
2.19487e-17	0.343406	0.685	0.329	5.1529e-13	PGC	TRIAP1	0.343406
2.2119e-17	-0.573305	1	0.991	5.19289e-13	PGC	HSP90AA1	-0.573305
2.21327e-17	0.178462	0.3	0.07	5.19609e-13	PGC	PSORS1C2	0.178462
2.4779e-17	0.248511	0.455	0.155	5.81738e-13	PGC	MT1F	0.248511
2.73861e-17	-0.396123	0.015	0.22	6.42943e-13	PGC	C1orf146	-0.396123
2.89733e-17	0.213286	0.37	0.108	6.80205e-13	PGC	SLC2A14	0.213286
2.90663e-17	-0.472611	0.115	0.355	6.8239e-13	PGC	TESC	-0.472611
3.01252e-17	-0.334124	0.06	0.305	7.0725e-13	PGC	HOXC9	-0.334124
3.30837e-17	-0.511676	0.205	0.454	7.76706e-13	PGC	PTBP2	-0.511676
3.3248e-17	0.267067	0.47	0.212	7.80562e-13	PGC	ALDOC	0.267067
3.65532e-17	-0.577106	0.525	0.662	8.58159e-13	PGC	MAP7D3	-0.577106
3.87163e-17	-0.373181	0.035	0.259	9.08942e-13	PGC	TEX11	-0.373181
3.94798e-17	-0.391424	0.03	0.259	9.26867e-13	PGC	ID2	-0.391424
3.97182e-17	0.0913273	0.15	0.02	9.32464e-13	PGC	AC008083.1	0.0913273
4.04797e-17	0.235435	0.575	0.235	9.50342e-13	PGC	GSTM4	0.235435
4.25169e-17	0.335379	0.79	0.492	9.98169e-13	PGC	KIAA1551	0.335379
4.31328e-17	0.255588	0.995	0.979	1.01263e-12	PGC	RPS19	0.255588
4.39716e-17	-0.457724	0.135	0.388	1.03232e-12	PGC	TDRD9	-0.457724
4.44684e-17	-0.335145	0.14	0.392	1.04398e-12	PGC	HOXA7	-0.335145
4.52845e-17	0.344383	0.78	0.45	1.06314e-12	PGC	SERPING1	0.344383
4.72974e-17	-0.461359	0.02	0.233	1.1104e-12	PGC	SOHLH1	-0.461359
5.1118e-17	-0.52283	0.215	0.447	1.2001e-12	PGC	FOXR1	-0.52283
5.54936e-17	0.314103	0.745	0.438	1.30282e-12	PGC	SUMF2	0.314103
6.79652e-17	-0.693003	0.73	0.767	1.59562e-12	PGC	RCN2	-0.693003
6.90145e-17	-0.236627	0.04	0.262	1.62025e-12	PGC	RRAGD	-0.236627
7.04226e-17	0.248018	0.605	0.293	1.65331e-12	PGC	SLC30A5	0.248018
7.76794e-17	0.300668	0.935	0.721	1.82368e-12	PGC	FBL	0.300668
8.01199e-17	0.343154	0.935	0.685	1.88098e-12	PGC	P4HB	0.343154
8.55478e-17	0.338092	0.96	0.85	2.00841e-12	PGC	BSG	0.338092
8.5712e-17	-0.529561	0.18	0.416	2.01226e-12	PGC	PITRM1	-0.529561
9.02097e-17	-0.212455	0	0.172	2.11785e-12	PGC	CYP26A1	-0.212455
9.10136e-17	-0.713613	0.675	0.732	2.13673e-12	PGC	MLF1	-0.713613
9.81012e-17	0.280759	0.7	0.407	2.30312e-12	PGC	MRPS2	0.280759
1.04443e-16	0.322914	0.965	0.842	2.45202e-12	PGC	EIF3F	0.322914
1.06529e-16	-0.347436	0.105	0.342	2.50099e-12	PGC	ASF1B	-0.347436
1.07789e-16	-0.209504	0.015	0.218	2.53057e-12	PGC	HOXA10	-0.209504
1.156e-16	-0.538625	0.47	0.637	2.71395e-12	PGC	NGLY1	-0.538625
1.28065e-16	-0.726973	0.345	0.498	3.00659e-12	PGC	PDHA1	-0.726973
1.30795e-16	-0.143483	0	0.17	3.07068e-12	PGC	HOXA5	-0.143483
1.32547e-16	-0.414367	0.155	0.391	3.11181e-12	PGC	SLC25A14	-0.414367
1.35764e-16	-0.401486	0.145	0.391	3.18732e-12	PGC	TMCO1	-0.401486
1.37395e-16	0.258825	0.56	0.268	3.22562e-12	PGC	NLE1	0.258825
1.52723e-16	0.280223	0.97	0.825	3.58548e-12	PGC	PFDN5	0.280223
1.53347e-16	0.313394	0.78	0.41	3.60013e-12	PGC	ANXA6	0.313394
1.59582e-16	-0.279571	0.045	0.278	3.7465e-12	PGC	DEPDC1	-0.279571
1.68025e-16	0.234244	0.59	0.276	3.94472e-12	PGC	CERS5	0.234244
1.73586e-16	0.341154	0.72	0.394	4.07527e-12	PGC	PMAIP1	0.341154
1.74852e-16	0.231774	0.575	0.246	4.10501e-12	PGC	SNAP23	0.231774
1.78561e-16	0.267531	0.615	0.284	4.19208e-12	PGC	AEN	0.267531
1.96832e-16	-0.430805	0.205	0.437	4.62102e-12	PGC	SAMD11	-0.430805
2.13161e-16	0.325053	0.92	0.703	5.00438e-12	PGC	NHP2	0.325053
2.38415e-16	-0.544292	0.495	0.613	5.59726e-12	PGC	HAGH	-0.544292
2.77068e-16	-1.00781	1	0.972	6.50472e-12	PGC	MT-CO1	-1.00781
2.87654e-16	0.315135	0.775	0.472	6.75326e-12	PGC	TMEM11	0.315135
3.45229e-16	0.287773	0.98	0.766	8.10494e-12	PGC	RPL36AL	0.287773
3.71736e-16	-0.440318	0.255	0.498	8.72725e-12	PGC	CD99	-0.440318
4.22474e-16	0.261297	0.39	0.113	9.91842e-12	PGC	TRANK1	0.261297
4.93697e-16	0.156333	0.335	0.071	1.15905e-11	PGC	CAPN13	0.156333
5.03285e-16	0.122523	0.275	0.056	1.18156e-11	PGC	GPR4	0.122523
5.483e-16	-0.454415	0.3	0.532	1.28724e-11	PGC	TMEM98	-0.454415
5.63668e-16	0.389943	0.96	0.707	1.32332e-11	PGC	GSTP1	0.389943
5.72447e-16	-0.405392	0.16	0.438	1.34393e-11	PGC	BIRC5	-0.405392
5.81801e-16	0.189473	0.35	0.077	1.3659e-11	PGC	ESAM	0.189473
6.23108e-16	0.343784	0.78	0.408	1.46287e-11	PGC	LGALS1	0.343784
6.52855e-16	0.143697	0.29	0.073	1.53271e-11	PGC	TMC7	0.143697
6.53343e-16	-0.414449	0.19	0.426	1.53385e-11	PGC	BUB1	-0.414449
7.6357e-16	-0.458537	0.16	0.39	1.79263e-11	PGC	ZNF280B	-0.458537
7.82193e-16	-0.577818	0.455	0.589	1.83635e-11	PGC	P4HA2	-0.577818
7.89425e-16	-0.406873	0.04	0.267	1.85333e-11	PGC	ACTL8	-0.406873
8.05295e-16	-0.56744	0.68	0.771	1.89059e-11	PGC	MAP7D2	-0.56744
8.33561e-16	-0.256327	0.04	0.263	1.95695e-11	PGC	MYEF2	-0.256327
8.57088e-16	-0.29854	0.11	0.358	2.01219e-11	PGC	SPAG5	-0.29854
8.60883e-16	0.262363	0.595	0.331	2.02109e-11	PGC	DFFA	0.262363
9.0569e-16	0.27943	0.55	0.261	2.12629e-11	PGC	TGFB1	0.27943
9.50759e-16	-0.259279	0.095	0.317	2.2321e-11	PGC	KIF23	-0.259279
9.85324e-16	-0.598891	0.5	0.651	2.31324e-11	PGC	USP9X	-0.598891
9.97277e-16	0.228682	0.485	0.198	2.34131e-11	PGC	OPHN1	0.228682
1.02094e-15	-0.301552	0.1	0.342	2.39686e-11	PGC	PRTG	-0.301552
1.06639e-15	0.314011	0.735	0.429	2.50356e-11	PGC	SNX10	0.314011
1.06942e-15	0.315711	0.92	0.667	2.51068e-11	PGC	SOX4	0.315711
1.26786e-15	0.308415	0.87	0.638	2.97656e-11	PGC	EIF4B	0.308415
1.27486e-15	0.307519	0.955	0.755	2.99298e-11	PGC	NDUFB5	0.307519
1.28112e-15	-1.27664	0.835	0.8	3.00769e-11	PGC	MALAT1	-1.27664
1.3076e-15	-0.776319	0.505	0.644	3.06985e-11	PGC	MT-ND6	-0.776319
1.40331e-15	0.183407	0.405	0.115	3.29456e-11	PGC	FBLIM1	0.183407
1.47142e-15	0.244813	0.635	0.334	3.45446e-11	PGC	RABGGTB	0.244813
1.47148e-15	0.303167	0.82	0.568	3.45459e-11	PGC	AKR1A1	0.303167
1.62702e-15	-0.62269	0.685	0.721	3.81974e-11	PGC	TTC3	-0.62269
1.6283e-15	-0.290645	0.065	0.328	3.82276e-11	PGC	NUF2	-0.290645
1.7225e-15	-0.747367	0.615	0.712	4.04391e-11	PGC	CHIC2	-0.747367
1.82019e-15	-0.196268	0.01	0.185	4.27326e-11	PGC	ZNF503	-0.196268
1.98042e-15	0.158285	0.34	0.084	4.64943e-11	PGC	PTH2	0.158285
1.98088e-15	-0.629912	0.65	0.728	4.65051e-11	PGC	ANKRD12	-0.629912
1.9815e-15	-0.361351	0.015	0.208	4.65198e-11	PGC	MORC1	-0.361351
1.98235e-15	-0.389072	0.035	0.213	4.65395e-11	PGC	RHOXF1	-0.389072
2.02192e-15	0.170917	0.33	0.107	4.74685e-11	PGC	TUFT1	0.170917
2.04464e-15	0.303117	0.91	0.634	4.8002e-11	PGC	MESD	0.303117
2.10232e-15	0.287898	0.93	0.741	4.93562e-11	PGC	AP2M1	0.287898
2.15751e-15	0.158781	0.34	0.102	5.06518e-11	PGC	PCED1B	0.158781
2.1746e-15	0.325616	0.895	0.657	5.1053e-11	PGC	WSB1	0.325616
2.2211e-15	0.353183	0.75	0.522	5.21448e-11	PGC	EPB41L2	0.353183
2.24386e-15	0.196044	0.405	0.147	5.2679e-11	PGC	OCLN	0.196044
2.32811e-15	-0.223597	0.005	0.177	5.46569e-11	PGC	SPOCK3	-0.223597
2.4922e-15	-0.447941	0.26	0.469	5.85095e-11	PGC	CHAF1A	-0.447941
2.54624e-15	-0.688898	0.895	0.87	5.9778e-11	PGC	SPCS1	-0.688898
2.54792e-15	-0.347343	0.13	0.349	5.98175e-11	PGC	NPW	-0.347343
2.62548e-15	0.333013	0.725	0.417	6.16384e-11	PGC	YPEL2	0.333013
2.6271e-15	0.256172	0.64	0.347	6.16764e-11	PGC	DCPS	0.256172
2.67605e-15	-0.76749	0.59	0.68	6.28256e-11	PGC	SRP9	-0.76749
2.74373e-15	-0.440526	0.005	0.171	6.44146e-11	PGC	TEX12	-0.440526
2.76029e-15	0.285568	0.595	0.287	6.48032e-11	PGC	CDX1	0.285568
2.76807e-15	-0.325386	0.065	0.288	6.49859e-11	PGC	AC022784.1	-0.325386
2.80015e-15	-0.340874	0.03	0.226	6.57391e-11	PGC	ADAD2	-0.340874
3.16907e-15	0.233708	0.52	0.238	7.44002e-11	PGC	HMGN4	0.233708
3.23855e-15	-0.31559	0.12	0.389	7.60314e-11	PGC	CDK1	-0.31559
3.4485e-15	0.344636	0.885	0.679	8.09605e-11	PGC	C4orf3	0.344636
3.46624e-15	-0.243258	0.01	0.181	8.13768e-11	PGC	LINC01579	-0.243258
3.53254e-15	0.311527	1	0.933	8.29334e-11	PGC	ACTB	0.311527
3.62114e-15	-0.438551	0.2	0.401	8.50134e-11	PGC	TSC22D1	-0.438551
3.65135e-15	0.284202	0.555	0.255	8.57228e-11	PGC	SUMF1	0.284202
3.75839e-15	-0.266764	0.045	0.253	8.82358e-11	PGC	HBQ1	-0.266764
4.2182e-15	0.175174	0.365	0.111	9.90307e-11	PGC	F2R	0.175174
4.68661e-15	0.218605	0.965	0.762	1.10028e-10	PGC	TUBA1C	0.218605
4.71433e-15	0.24839	0.55	0.272	1.10678e-10	PGC	PGM2	0.24839
4.91339e-15	0.241586	0.565	0.292	1.15352e-10	PGC	ABCB8	0.241586
5.28539e-15	0.201761	0.47	0.162	1.24085e-10	PGC	INA	0.201761
5.55845e-15	0.279453	0.95	0.761	1.30496e-10	PGC	C19orf53	0.279453
5.60479e-15	-0.495476	0.27	0.498	1.31584e-10	PGC	PHF8	-0.495476
5.72283e-15	0.244531	0.6	0.303	1.34355e-10	PGC	SURF6	0.244531
5.75053e-15	0.309701	0.765	0.498	1.35005e-10	PGC	DAP3	0.309701
6.53143e-15	0.301665	0.905	0.67	1.53338e-10	PGC	APP	0.301665
6.64674e-15	0.326375	0.665	0.298	1.56046e-10	PGC	MT1X	0.326375
6.76537e-15	0.264739	0.81	0.507	1.5883e-10	PGC	DENR	0.264739
6.81512e-15	-0.529266	0.105	0.318	1.59999e-10	PGC	SYCE3	-0.529266
6.89277e-15	-0.329985	0.17	0.412	1.61821e-10	PGC	TEX14	-0.329985
6.90004e-15	-0.535448	0.165	0.412	1.61992e-10	PGC	HIST1H2BJ	-0.535448
7.14536e-15	0.28847	0.675	0.377	1.67752e-10	PGC	CLIC1	0.28847
7.24408e-15	-0.432487	0.235	0.516	1.70069e-10	PGC	ZWINT	-0.432487
7.43092e-15	0.286188	0.975	0.894	1.74456e-10	PGC	RPL31	0.286188
7.59516e-15	0.312588	0.765	0.489	1.78312e-10	PGC	TXNDC15	0.312588
8.35451e-15	-0.29212	0.005	0.186	1.96139e-10	PGC	FAM25G	-0.29212
8.36785e-15	-0.39099	0.245	0.47	1.96452e-10	PGC	AGBL5	-0.39099
8.7125e-15	0.297019	0.9	0.713	2.04543e-10	PGC	PGD	0.297019
8.71463e-15	-0.41962	0.175	0.414	2.04593e-10	PGC	OXR1	-0.41962
8.82334e-15	0.243219	0.42	0.171	2.07146e-10	PGC	FXYD6	0.243219
8.88033e-15	0.289263	0.785	0.505	2.08483e-10	PGC	EPRS	0.289263
9.27284e-15	0.254451	0.995	0.917	2.17698e-10	PGC	PFN1	0.254451
9.48684e-15	-0.311839	0.02	0.211	2.22722e-10	PGC	CTCFL	-0.311839
9.54289e-15	-0.371619	0.05	0.273	2.24038e-10	PGC	RAD9B	-0.371619
9.55405e-15	-0.490236	0.375	0.557	2.243e-10	PGC	CSRP2	-0.490236
9.59215e-15	0.295703	0.93	0.698	2.25195e-10	PGC	MARCKSL1	0.295703
9.78297e-15	0.271852	0.97	0.842	2.29675e-10	PGC	EIF3L	0.271852
9.90336e-15	-0.548283	0.515	0.642	2.32501e-10	PGC	VPS26A	-0.548283
1.0331e-14	0.155447	0.37	0.108	2.42541e-10	PGC	AL031058.1	0.155447
1.10765e-14	-0.352011	0.2	0.413	2.60042e-10	PGC	PRADC1	-0.352011
1.12251e-14	0.277799	0.55	0.274	2.63531e-10	PGC	MAGED1	0.277799
1.15033e-14	-0.268975	0.09	0.302	2.70062e-10	PGC	XPNPEP1	-0.268975
1.19881e-14	-0.970881	0.03	0.187	2.81444e-10	PGC	FIGLA	-0.970881
1.21946e-14	-0.349363	0.02	0.215	2.86293e-10	PGC	TOPAZ1	-0.349363
1.2989e-14	0.258896	0.99	0.926	3.04943e-10	PGC	RPL21	0.258896
1.31761e-14	-0.229559	0.025	0.248	3.09336e-10	PGC	LY6G5C	-0.229559
1.3297e-14	-0.3102	0.055	0.246	3.12175e-10	PGC	ANKRD31	-0.3102
1.33699e-14	-0.212068	0.055	0.266	3.13884e-10	PGC	SPATS2L	-0.212068
1.45827e-14	0.295448	0.83	0.592	3.42359e-10	PGC	PQBP1	0.295448
1.48209e-14	0.179209	0.34	0.108	3.4795e-10	PGC	RTN2	0.179209
1.52841e-14	-0.799044	0.28	0.438	3.58824e-10	PGC	C5orf58	-0.799044
1.5909e-14	-0.725143	0.665	0.735	3.73494e-10	PGC	HSPB1	-0.725143
1.7113e-14	0.277158	0.7	0.373	4.01763e-10	PGC	CRIP2	0.277158
1.75917e-14	-0.435687	0.05	0.255	4.13001e-10	PGC	HIST1H2BA	-0.435687
1.79217e-14	0.159615	0.355	0.122	4.20748e-10	PGC	CCDC33	0.159615
1.80837e-14	0.26159	0.58	0.279	4.24551e-10	PGC	COL4A2	0.26159
1.8175e-14	-0.516058	0.65	0.698	4.26694e-10	PGC	DEK	-0.516058
1.89761e-14	-0.562553	0.22	0.444	4.45501e-10	PGC	UBE2C	-0.562553
1.90131e-14	-0.305389	0.11	0.386	4.46371e-10	PGC	PBK	-0.305389
2.05365e-14	0.293996	0.75	0.472	4.82134e-10	PGC	SCP2	0.293996
2.13064e-14	-0.459015	0.095	0.306	5.00211e-10	PGC	MEIOC	-0.459015
2.24187e-14	-0.33263	0.01	0.179	5.26325e-10	PGC	SYNGR4	-0.33263
2.31533e-14	0.187699	0.28	0.071	5.43571e-10	PGC	GUCA1A	0.187699
2.55284e-14	-0.434992	0.03	0.235	5.99331e-10	PGC	SYCE2	-0.434992
2.86159e-14	0.234211	0.995	0.943	6.71816e-10	PGC	RPS21	0.234211
2.90115e-14	-0.125825	0.005	0.165	6.81103e-10	PGC	TBX2-AS1	-0.125825
2.96176e-14	0.249527	0.545	0.282	6.95333e-10	PGC	NCBP2-AS2	0.249527
3.05255e-14	0.277554	0.8	0.541	7.16646e-10	PGC	MTMR14	0.277554
3.09631e-14	0.239707	0.665	0.319	7.2692e-10	PGC	TAF11	0.239707
3.10664e-14	-0.40867	0.38	0.576	7.29346e-10	PGC	NSUN5	-0.40867
3.32743e-14	0.259048	0.86	0.603	7.8118e-10	PGC	RBPMS	0.259048
3.49779e-14	-0.578547	0.02	0.19	8.21176e-10	PGC	SHCBP1L	-0.578547
3.56882e-14	0.257382	0.71	0.348	8.37851e-10	PGC	ACTN1	0.257382
3.6686e-14	-0.282252	0.02	0.187	8.61276e-10	PGC	ASZ1	-0.282252
3.7974e-14	-0.46558	0.54	0.675	8.91514e-10	PGC	LRRFIP2	-0.46558
4.08745e-14	-0.189644	0.025	0.224	9.5961e-10	PGC	NEK2	-0.189644
4.12955e-14	0.245959	0.53	0.249	9.69495e-10	PGC	LPIN1	0.245959
4.36482e-14	-0.518263	0.75	0.782	1.02473e-09	PGC	BUB3	-0.518263
4.44245e-14	0.165161	0.34	0.095	1.04295e-09	PGC	FUT4	0.165161
4.70655e-14	-0.365382	0.185	0.398	1.10496e-09	PGC	SSFA2	-0.365382
4.78983e-14	0.332309	0.86	0.649	1.12451e-09	PGC	PDLIM1	0.332309
4.85753e-14	0.288732	0.88	0.678	1.1404e-09	PGC	TOMM20	0.288732
5.11588e-14	0.286209	0.905	0.662	1.20106e-09	PGC	ADH5	0.286209
5.12802e-14	0.241069	0.58	0.282	1.2039e-09	PGC	CTSA	0.241069
5.2106e-14	-0.369466	0.045	0.249	1.22329e-09	PGC	TDRD6	-0.369466
5.27486e-14	-0.361664	0.27	0.528	1.23838e-09	PGC	MED10	-0.361664
5.65771e-14	0.228979	0.665	0.368	1.32826e-09	PGC	MRS2	0.228979
5.6959e-14	-0.227956	0.035	0.234	1.33723e-09	PGC	2021-03-10	-0.227956
5.8201e-14	0.229044	0.52	0.217	1.36639e-09	PGC	CALD1	0.229044
5.90409e-14	0.268143	0.655	0.424	1.3861e-09	PGC	LDOC1	0.268143
6.00656e-14	-0.272815	0.07	0.274	1.41016e-09	PGC	MCUB	-0.272815
6.27727e-14	0.212197	0.48	0.236	1.47371e-09	PGC	SH3BP1	0.212197
6.37967e-14	0.241947	0.415	0.144	1.49776e-09	PGC	COL4A1	0.241947
6.8562e-14	-2.26139	0.05	0.191	1.60963e-09	PGC	ZP3	-2.26139
6.89369e-14	0.229686	0.99	0.886	1.61843e-09	PGC	ATP5MC2	0.229686
7.31237e-14	0.259291	0.945	0.75	1.71673e-09	PGC	ARF1	0.259291
7.81021e-14	-0.233851	0.015	0.196	1.8336e-09	PGC	MEI1	-0.233851
8.10901e-14	-0.547272	0.695	0.73	1.90375e-09	PGC	NGRN	-0.547272
8.24846e-14	-0.334636	0.065	0.241	1.93649e-09	PGC	LMO7	-0.334636
8.34364e-14	0.283626	0.73	0.453	1.95884e-09	PGC	KXD1	0.283626
8.37914e-14	0.285386	0.875	0.588	1.96717e-09	PGC	ZNF593	0.285386
8.70832e-14	0.222786	0.545	0.281	2.04445e-09	PGC	LARP6	0.222786
8.83605e-14	0.181337	0.37	0.112	2.07444e-09	PGC	ARL8A	0.181337
8.94607e-14	0.229207	0.545	0.244	2.10027e-09	PGC	LITAF	0.229207
9.19651e-14	0.319741	0.835	0.555	2.15907e-09	PGC	ZFP36L2	0.319741
9.34338e-14	0.366627	0.375	0.132	2.19355e-09	PGC	MT1G	0.366627
9.45297e-14	-0.297756	0	0.14	2.21927e-09	PGC	HIST3H3	-0.297756
9.54996e-14	0.271471	0.665	0.308	2.24204e-09	PGC	MT2A	0.271471
9.87916e-14	0.232573	0.61	0.287	2.31933e-09	PGC	DHX33	0.232573
1.04514e-13	-0.580397	0.685	0.724	2.45367e-09	PGC	ATP6V1D	-0.580397
1.10914e-13	0.180533	0.35	0.116	2.60393e-09	PGC	TAGLN3	0.180533
1.13791e-13	0.304702	0.725	0.42	2.67147e-09	PGC	KIT	0.304702
1.1759e-13	-0.393865	0.16	0.384	2.76067e-09	PGC	CDC45	-0.393865
1.25017e-13	0.280658	0.705	0.445	2.93502e-09	PGC	EPB41L4A-AS1	0.280658
1.2853e-13	0.262239	0.795	0.496	3.0175e-09	PGC	CHEK1	0.262239
1.29813e-13	0.223194	0.73	0.372	3.04762e-09	PGC	MTHFD1	0.223194
1.37305e-13	-0.267743	0.065	0.252	3.2235e-09	PGC	AK9	-0.267743
1.3768e-13	0.262954	0.545	0.308	3.23232e-09	PGC	ZNF138	0.262954
1.39174e-13	-0.188169	0.025	0.228	3.26739e-09	PGC	NR2F1-AS1	-0.188169
1.47959e-13	0.252628	0.945	0.737	3.47362e-09	PGC	HIGD2A	0.252628
1.62697e-13	-0.289148	0.025	0.186	3.81964e-09	PGC	FHL1	-0.289148
1.68834e-13	0.208549	0.515	0.224	3.96371e-09	PGC	NSMAF	0.208549
1.69061e-13	0.217132	0.455	0.188	3.96904e-09	PGC	NR2C2AP	0.217132
1.73343e-13	0.293176	0.745	0.46	4.06956e-09	PGC	RHOC	0.293176
1.75258e-13	-0.220741	0.055	0.249	4.11454e-09	PGC	WASF3	-0.220741
1.75355e-13	-0.151161	0.005	0.156	4.11681e-09	PGC	RFX6	-0.151161
1.7971e-13	-0.417044	0.135	0.402	4.21904e-09	PGC	HIST1H1A	-0.417044
1.8415e-13	-0.591543	0.085	0.264	4.32329e-09	PGC	LDHAL6A	-0.591543
1.84777e-13	0.0746112	0.125	0.014	4.33801e-09	PGC	MT4	0.0746112
1.88647e-13	-0.18949	0.02	0.183	4.42886e-09	PGC	UGT8	-0.18949
1.89801e-13	-0.166738	0.05	0.251	4.45595e-09	PGC	KIF15	-0.166738
1.94163e-13	-0.269537	0	0.137	4.55838e-09	PGC	LINC01582	-0.269537
1.95552e-13	0.310887	0.535	0.306	4.59098e-09	PGC	PRSS23	0.310887
2.08251e-13	-0.324693	0.095	0.265	4.88912e-09	PGC	PLK1	-0.324693
2.09461e-13	-0.35388	0.15	0.357	4.91752e-09	PGC	RBP1	-0.35388
2.1001e-13	-0.384753	0.12	0.311	4.93041e-09	PGC	CCDC152	-0.384753
2.10231e-13	-0.473376	0.44	0.588	4.93559e-09	PGC	KIF20B	-0.473376
2.12905e-13	0.297094	0.88	0.667	4.99837e-09	PGC	TMEM123	0.297094
2.25409e-13	0.212984	0.44	0.162	5.29192e-09	PGC	PODXL	0.212984
2.37154e-13	-0.306097	0.02	0.195	5.56766e-09	PGC	MAL2	-0.306097
2.38822e-13	0.130609	0.235	0.072	5.60681e-09	PGC	CTH	0.130609
2.41768e-13	-0.575045	0.61	0.678	5.67599e-09	PGC	NKAP	-0.575045
2.41786e-13	0.222036	0.595	0.258	5.67641e-09	PGC	FAM234A	0.222036
2.52221e-13	-0.318226	0.12	0.335	5.9214e-09	PGC	ZNF800	-0.318226
2.55635e-13	-0.448025	0.01	0.17	6.00155e-09	PGC	ZPBP2	-0.448025
2.56924e-13	-0.569954	0.495	0.606	6.03181e-09	PGC	CTSH	-0.569954
2.69443e-13	-0.589993	0.72	0.748	6.32572e-09	PGC	DYNLT1	-0.589993
2.75578e-13	-0.440224	0.25	0.459	6.46975e-09	PGC	RNF219	-0.440224
2.7888e-13	-0.527069	0.975	0.965	6.54726e-09	PGC	UBB	-0.527069
3.06082e-13	-0.594561	0.88	0.886	7.18588e-09	PGC	ATP6V0C	-0.594561
3.06354e-13	-0.234296	0.055	0.239	7.19227e-09	PGC	CCDC122	-0.234296
3.15425e-13	-0.267781	0.015	0.167	7.40524e-09	PGC	LACC1	-0.267781
3.32646e-13	-0.200687	0	0.134	7.80953e-09	PGC	ADGRG6	-0.200687
3.44552e-13	0.211123	0.335	0.113	8.08904e-09	PGC	CRYM	0.211123
3.54135e-13	-0.52611	0.155	0.345	8.31402e-09	PGC	AP1S2	-0.52611
3.80912e-13	-0.612445	0.825	0.822	8.94268e-09	PGC	SBNO1	-0.612445
3.88058e-13	0.256131	0.765	0.507	9.11044e-09	PGC	SUPT4H1	0.256131
4.11565e-13	0.280224	0.805	0.48	9.66232e-09	PGC	IFI16	0.280224
4.21137e-13	-0.356872	0.28	0.455	9.88702e-09	PGC	TOP1MT	-0.356872
4.21767e-13	0.330251	0.875	0.63	9.90182e-09	PGC	TXNL4A	0.330251
4.26323e-13	0.155154	0.28	0.072	1.00088e-08	PGC	RAB15	0.155154
4.36237e-13	0.177237	0.45	0.185	1.02415e-08	PGC	GLMP	0.177237
4.44362e-13	-0.702898	0.375	0.512	1.04323e-08	PGC	ALG13	-0.702898
4.68578e-13	0.238523	0.605	0.332	1.10008e-08	PGC	TRAF4	0.238523
4.70278e-13	-0.343391	0.265	0.492	1.10407e-08	PGC	COPS7B	-0.343391
4.91733e-13	-0.239557	0.045	0.235	1.15444e-08	PGC	RUNX1T1	-0.239557
5.36373e-13	-0.405507	0.295	0.484	1.25924e-08	PGC	SASS6	-0.405507
5.45193e-13	-0.363308	0.2	0.367	1.27995e-08	PGC	FBXO25	-0.363308
5.78109e-13	-0.491219	0.685	0.734	1.35723e-08	PGC	ARL6IP4	-0.491219
5.78565e-13	0.191642	0.46	0.218	1.3583e-08	PGC	CORO1B	0.191642
5.86162e-13	-0.393029	0.17	0.343	1.37613e-08	PGC	RAB40B	-0.393029
6.1619e-13	0.253627	0.715	0.466	1.44663e-08	PGC	GPATCH4	0.253627
6.34534e-13	0.178968	0.45	0.179	1.4897e-08	PGC	RND2	0.178968
6.48831e-13	-0.295601	0.02	0.171	1.52326e-08	PGC	CTAG2	-0.295601
6.56324e-13	-0.474508	0.57	0.657	1.54085e-08	PGC	C12orf75	-0.474508
6.8384e-13	-0.967843	0.005	0.138	1.60545e-08	PGC	NOBOX	-0.967843
6.86956e-13	-0.945326	0.525	0.63	1.61277e-08	PGC	HSPA1A	-0.945326
6.98812e-13	-0.684469	0.91	0.863	1.6406e-08	PGC	HMGA1	-0.684469
7.14308e-13	-0.611418	0.88	0.87	1.67698e-08	PGC	NDUFB6	-0.611418
7.51613e-13	0.275497	0.83	0.576	1.76456e-08	PGC	PAICS	0.275497
8.2536e-13	-0.170104	0.01	0.167	1.9377e-08	PGC	RASSF8-AS1	-0.170104
8.59446e-13	0.253306	0.705	0.41	2.01772e-08	PGC	SENP2	0.253306
8.6792e-13	0.200443	0.44	0.189	2.03762e-08	PGC	HK1	0.200443
8.78481e-13	-0.370392	0.06	0.263	2.06241e-08	PGC	HIST1H1T	-0.370392
9.06867e-13	-0.534546	0.525	0.647	2.12905e-08	PGC	CCDC112	-0.534546
9.24844e-13	-0.351873	0.285	0.494	2.17126e-08	PGC	FANCI	-0.351873
9.30899e-13	-0.944805	0.365	0.442	2.18547e-08	PGC	REC8	-0.944805
9.34349e-13	0.155426	0.315	0.098	2.19357e-08	PGC	SLC6A6	0.155426
9.37267e-13	-0.610231	0.41	0.523	2.20042e-08	PGC	MORN2	-0.610231
9.4343e-13	0.258445	0.65	0.372	2.21489e-08	PGC	PNPT1	0.258445
9.46216e-13	-0.310765	0.005	0.146	2.22143e-08	PGC	UPB1	-0.310765
9.74547e-13	-0.158497	0.005	0.148	2.28794e-08	PGC	LRMDA	-0.158497
9.78113e-13	-0.334566	0.04	0.218	2.29632e-08	PGC	JADE3	-0.334566
1.01977e-12	0.263926	0.795	0.529	2.39412e-08	PGC	POLR1C	0.263926
1.02215e-12	0.263913	0.875	0.651	2.3997e-08	PGC	MAPK1IP1L	0.263913
1.02551e-12	0.208275	0.37	0.149	2.40758e-08	PGC	NKAIN4	0.208275
1.0264e-12	-0.411621	0.34	0.519	2.40968e-08	PGC	DNMT1	-0.411621
1.02799e-12	-0.347498	0.29	0.511	2.41341e-08	PGC	SGO1	-0.347498
1.04344e-12	0.265839	0.915	0.704	2.44969e-08	PGC	WDR1	0.265839
1.05719e-12	-0.173011	0.01	0.157	2.48197e-08	PGC	SIMC1	-0.173011
1.05872e-12	-0.444382	0.18	0.358	2.48555e-08	PGC	MESP1	-0.444382
1.06961e-12	-0.573746	0.805	0.801	2.51113e-08	PGC	UBE2E3	-0.573746
1.07438e-12	-0.325498	0.215	0.412	2.52231e-08	PGC	TMSB15A	-0.325498
1.10009e-12	-0.689747	0.895	0.882	2.58268e-08	PGC	HERC5	-0.689747
1.11313e-12	-0.671646	0.69	0.718	2.61329e-08	PGC	SSR4	-0.671646
1.1385e-12	0.201286	0.435	0.168	2.67285e-08	PGC	VASP	0.201286
1.16978e-12	-0.458313	0.36	0.507	2.74629e-08	PGC	DUSP22	-0.458313
1.20311e-12	0.104736	0.26	0.071	2.82455e-08	PGC	CORO1A	0.104736
1.22711e-12	-0.361397	0.27	0.468	2.88089e-08	PGC	TTK	-0.361397
1.23523e-12	-0.549642	0.705	0.73	2.89994e-08	PGC	MRPL51	-0.549642
1.25582e-12	-0.179101	0.02	0.173	2.94828e-08	PGC	LRRC34	-0.179101
1.27141e-12	0.196846	0.495	0.213	2.98488e-08	PGC	RAB11FIP4	0.196846
1.29643e-12	0.512409	0.83	0.627	3.04364e-08	PGC	SRM	0.512409
1.31978e-12	-0.637861	0.225	0.415	3.09844e-08	PGC	JAZF1	-0.637861
1.33332e-12	-0.577715	0.825	0.791	3.13023e-08	PGC	CENPH	-0.577715
1.42788e-12	0.20246	0.675	0.392	3.35222e-08	PGC	RBFA	0.20246
1.48122e-12	0.259555	0.505	0.248	3.47745e-08	PGC	NRK	0.259555
1.51478e-12	-0.30437	0.135	0.354	3.55625e-08	PGC	NCAPG	-0.30437
1.53377e-12	-0.580052	0.865	0.853	3.60082e-08	PGC	UBA2	-0.580052
1.54544e-12	-0.3985	0.445	0.577	3.62822e-08	PGC	GMNN	-0.3985
1.56045e-12	-0.652364	0.97	0.958	3.66348e-08	PGC	PCBP2	-0.652364
1.67357e-12	-0.468231	0.17	0.348	3.92905e-08	PGC	IGF2BP3	-0.468231
1.68547e-12	-0.611036	0.61	0.646	3.95699e-08	PGC	COX17	-0.611036
1.6933e-12	-0.205409	0.01	0.166	3.97536e-08	PGC	KIAA1211L	-0.205409
1.72085e-12	-0.483263	0.545	0.665	4.04003e-08	PGC	ZNF518A	-0.483263
1.74785e-12	-0.397928	0.34	0.518	4.10343e-08	PGC	PPP2R3C	-0.397928
1.84323e-12	0.278331	0.925	0.683	4.32734e-08	PGC	OSTC	0.278331
1.87484e-12	-0.230961	0.05	0.259	4.40156e-08	PGC	CD74	-0.230961
1.96408e-12	-0.24856	0.135	0.353	4.61107e-08	PGC	CKAP2L	-0.24856
1.9686e-12	-0.372533	0.295	0.468	4.62169e-08	PGC	CSNK1G3	-0.372533
1.99427e-12	0.0923269	0.15	0.016	4.68194e-08	PGC	LINC00479	0.0923269
2.04587e-12	0.188589	0.425	0.178	4.80309e-08	PGC	METAP1D	0.188589
2.10429e-12	0.213982	0.965	0.802	4.94023e-08	PGC	COX7A2	0.213982
2.16376e-12	-0.208079	0.085	0.3	5.07986e-08	PGC	SKA3	-0.208079
2.17948e-12	-0.456437	0.335	0.512	5.11678e-08	PGC	DLGAP5	-0.456437
2.2083e-12	-0.332918	0.2	0.402	5.18442e-08	PGC	NEK9	-0.332918
2.24205e-12	0.140034	0.255	0.071	5.26367e-08	PGC	CCDC163	0.140034
2.28138e-12	0.257074	0.775	0.532	5.356e-08	PGC	VAT1	0.257074
2.33377e-12	-0.608659	0.915	0.863	5.47899e-08	PGC	HSBP1	-0.608659
2.34954e-12	-0.512361	0.645	0.714	5.516e-08	PGC	ZFAND5	-0.512361
2.40498e-12	0.294676	0.695	0.418	5.64616e-08	PGC	TMEM159	0.294676
2.41552e-12	-0.299507	0.09	0.279	5.67091e-08	PGC	MOV10L1	-0.299507
2.42382e-12	0.150028	0.34	0.123	5.69039e-08	PGC	MBP	0.150028
2.42719e-12	0.272218	0.72	0.432	5.69832e-08	PGC	PTBP3	0.272218
2.48617e-12	0.0998317	0.2	0.036	5.83679e-08	PGC	VSX2	0.0998317
2.60772e-12	0.186319	0.44	0.217	6.12215e-08	PGC	CLDN7	0.186319
2.61642e-12	-0.231758	0.015	0.159	6.14258e-08	PGC	CCDC88C	-0.231758
2.63146e-12	-0.375764	0.355	0.518	6.17787e-08	PGC	UXS1	-0.375764
2.78946e-12	0.149874	0.36	0.129	6.54883e-08	PGC	TTYH1	0.149874
2.81604e-12	0.154413	0.31	0.099	6.61123e-08	PGC	MAP3K8	0.154413
2.90834e-12	-0.261671	0.1	0.315	6.8279e-08	PGC	CDCA3	-0.261671
3.02184e-12	-0.5798	0.805	0.801	7.09438e-08	PGC	PCM1	-0.5798
3.1744e-12	0.188099	0.435	0.177	7.45254e-08	PGC	ZMIZ1	0.188099
3.306e-12	-0.195162	0.02	0.167	7.76149e-08	PGC	HOXD8	-0.195162
3.35613e-12	-0.4382	0.38	0.542	7.87918e-08	PGC	C17orf75	-0.4382
3.37782e-12	0.264413	0.85	0.652	7.93011e-08	PGC	AHCY	0.264413
3.40725e-12	0.149367	0.245	0.059	7.99921e-08	PGC	PCAT14	0.149367
3.41827e-12	0.2014	0.585	0.294	8.02507e-08	PGC	GNAI2	0.2014
3.65056e-12	0.0890547	0.185	0.033	8.57042e-08	PGC	SLC16A9	0.0890547
3.67352e-12	-0.108236	0.005	0.138	8.62433e-08	PGC	HOXA9	-0.108236
3.77542e-12	0.224621	0.54	0.248	8.86355e-08	PGC	BSPRY	0.224621
3.80793e-12	0.210825	0.385	0.157	8.93988e-08	PGC	DSP	0.210825
3.90244e-12	0.271297	0.95	0.812	9.16175e-08	PGC	JPT1	0.271297
3.91329e-12	-0.492385	0.35	0.51	9.18723e-08	PGC	IFT81	-0.492385
4.00824e-12	-0.480408	0.98	0.971	9.41014e-08	PGC	SKP1	-0.480408
4.07925e-12	-0.404263	0.08	0.273	9.57685e-08	PGC	CAST	-0.404263
4.09023e-12	-0.198017	0.03	0.202	9.60263e-08	PGC	PELI2	-0.198017
4.31879e-12	0.253658	0.77	0.495	1.01392e-07	PGC	PLPP1	0.253658
4.36418e-12	-0.272789	0.1	0.293	1.02458e-07	PGC	ADA	-0.272789
4.38536e-12	0.203772	1	0.937	1.02955e-07	PGC	GAPDH	0.203772
4.46054e-12	0.223893	0.98	0.782	1.0472e-07	PGC	TPI1	0.223893
4.51148e-12	-0.456284	0.415	0.548	1.05916e-07	PGC	TRMT10A	-0.456284
4.61232e-12	0.24008	0.6	0.342	1.08283e-07	PGC	ZNF208	0.24008
4.7018e-12	-0.281801	0.035	0.194	1.10384e-07	PGC	C16orf74	-0.281801
4.82067e-12	-0.711371	0	0.122	1.13175e-07	PGC	NLRP5	-0.711371
4.88446e-12	0.195423	0.36	0.133	1.14672e-07	PGC	MYCN	0.195423
4.88876e-12	0.267583	0.955	0.728	1.14773e-07	PGC	MDH1	0.267583
5.01315e-12	-0.328734	0.205	0.382	1.17694e-07	PGC	ZHX1	-0.328734
5.04824e-12	0.224978	0.545	0.264	1.18517e-07	PGC	DLG3	0.224978
5.13555e-12	-0.171227	0.01	0.159	1.20567e-07	PGC	AL049870.3	-0.171227
5.26906e-12	-0.382475	0.24	0.461	1.23702e-07	PGC	PKMYT1	-0.382475
5.32397e-12	-0.521185	0.02	0.161	1.24991e-07	PGC	VCX	-0.521185
5.42023e-12	0.236702	0.66	0.355	1.27251e-07	PGC	AGL	0.236702
5.47611e-12	0.172685	0.45	0.18	1.28563e-07	PGC	IRX4	0.172685
5.75513e-12	-0.66739	0	0.121	1.35113e-07	PGC	IGHEP1	-0.66739
5.75513e-12	-0.119128	0	0.121	1.35113e-07	PGC	MSX1	-0.119128
5.80424e-12	0.263283	0.78	0.532	1.36266e-07	PGC	MCTS1	0.263283
5.8896e-12	-1.07263	0.96	0.905	1.3827e-07	PGC	HIST1H4C	-1.07263
5.91396e-12	-1.4943	0.015	0.13	1.38842e-07	PGC	PADI6	-1.4943
6.1646e-12	0.192111	1	0.881	1.44726e-07	PGC	TUBB	0.192111
6.22242e-12	-0.566939	0.915	0.893	1.46084e-07	PGC	PRDX5	-0.566939
6.58811e-12	-0.265712	0.03	0.201	1.54669e-07	PGC	REC114	-0.265712
6.70178e-12	-0.249517	0.115	0.311	1.57338e-07	PGC	OTULINL	-0.249517
6.76363e-12	0.281965	0.71	0.432	1.5879e-07	PGC	CAPG	0.281965
6.97984e-12	-0.394684	0.18	0.347	1.63866e-07	PGC	RNF212	-0.394684
7.06874e-12	0.222214	0.585	0.311	1.65953e-07	PGC	IFRD1	0.222214
7.25955e-12	-0.158811	0.01	0.146	1.70432e-07	PGC	RPA4	-0.158811
7.39856e-12	-0.237316	0.04	0.203	1.73696e-07	PGC	PGRMC1	-0.237316
7.47154e-12	-0.500298	0.045	0.22	1.75409e-07	PGC	FAM9C	-0.500298
7.52333e-12	0.220299	0.71	0.432	1.76625e-07	PGC	BLCAP	0.220299
7.59876e-12	0.261662	0.725	0.487	1.78396e-07	PGC	WDR77	0.261662
7.60202e-12	0.242758	0.885	0.651	1.78473e-07	PGC	PLEKHB2	0.242758
7.73358e-12	-0.272502	0.11	0.316	1.81561e-07	PGC	PLD6	-0.272502
7.82145e-12	0.165936	0.44	0.185	1.83624e-07	PGC	PLLP	0.165936
8.07257e-12	0.101004	0.135	0.019	1.8952e-07	PGC	IGF1	0.101004
8.54684e-12	-0.521978	0.89	0.875	2.00654e-07	PGC	SEPT7	-0.521978
8.60768e-12	-0.383808	0.185	0.384	2.02083e-07	PGC	FBXO3	-0.383808
8.69789e-12	-0.464251	0.61	0.68	2.042e-07	PGC	ILKAP	-0.464251
8.9471e-12	0.218062	0.6	0.285	2.10051e-07	PGC	SPINT1	0.218062
9.00645e-12	-0.467325	0.485	0.593	2.11444e-07	PGC	HSPB11	-0.467325
9.12235e-12	0.167125	0.43	0.158	2.14165e-07	PGC	UNC45A	0.167125
9.43401e-12	-0.541193	0.845	0.817	2.21482e-07	PGC	MFF	-0.541193
9.99817e-12	0.171879	0.37	0.146	2.34727e-07	PGC	DDIT4L	0.171879
1.02614e-11	-0.545594	0.84	0.81	2.40906e-07	PGC	MAP1LC3B	-0.545594
1.03193e-11	-0.665248	0.755	0.78	2.42266e-07	PGC	FABP5	-0.665248
1.05395e-11	-0.486139	0.58	0.647	2.47436e-07	PGC	MTDH	-0.486139
1.06048e-11	-0.612517	0.505	0.627	2.48969e-07	PGC	EZR	-0.612517
1.11353e-11	0.235558	0.835	0.566	2.61423e-07	PGC	MINDY2	0.235558
1.12927e-11	0.244892	0.71	0.447	2.65118e-07	PGC	MRPL9	0.244892
1.16045e-11	-0.192044	0.02	0.166	2.7244e-07	PGC	LINC01413	-0.192044
1.16759e-11	-0.371219	0	0.117	2.74115e-07	PGC	TUBA4A	-0.371219
1.22884e-11	-0.356924	0.055	0.218	2.88495e-07	PGC	AL033504.1	-0.356924
1.24503e-11	0.134787	0.295	0.095	2.92295e-07	PGC	ETV1	0.134787
1.26312e-11	-0.176351	0.01	0.143	2.96544e-07	PGC	PITX2	-0.176351
1.28344e-11	-0.285247	0.15	0.348	3.01313e-07	PGC	MOK	-0.285247
1.2963e-11	0.127449	0.26	0.078	3.04332e-07	PGC	LINC02387	0.127449
1.33969e-11	0.102537	0.255	0.075	3.1452e-07	PGC	ABCC12	0.102537
1.41762e-11	0.208422	0.775	0.512	3.32814e-07	PGC	CLPP	0.208422
1.57268e-11	-0.219448	0.055	0.222	3.69218e-07	PGC	HES6	-0.219448
1.57384e-11	0.0989591	0.22	0.068	3.69491e-07	PGC	BAK1	0.0989591
1.60037e-11	0.276574	0.94	0.775	3.75719e-07	PGC	CALR	0.276574
1.61659e-11	-0.287995	0.185	0.399	3.79528e-07	PGC	GPSM2	-0.287995
1.62113e-11	0.181521	0.32	0.107	3.80592e-07	PGC	TRIM2	0.181521
1.62532e-11	-0.514455	0.645	0.711	3.81576e-07	PGC	PTK2	-0.514455
1.70698e-11	0.203589	0.625	0.325	4.00748e-07	PGC	TRAF7	0.203589
1.71927e-11	-0.220331	0.03	0.197	4.03634e-07	PGC	SLC30A3	-0.220331
1.74225e-11	-0.298153	0.13	0.298	4.09029e-07	PGC	GATD1	-0.298153
1.74619e-11	-0.287909	0.035	0.228	4.09954e-07	PGC	PRSS21	-0.287909
1.78676e-11	0.200165	0.61	0.297	4.19477e-07	PGC	HKR1	0.200165
1.79382e-11	-0.383921	0.335	0.492	4.21135e-07	PGC	DCAF6	-0.383921
1.82377e-11	-0.340822	0.215	0.422	4.28166e-07	PGC	IFT122	-0.340822
1.93751e-11	-0.311226	0.245	0.436	4.5487e-07	PGC	FMR1	-0.311226
1.94655e-11	-0.158607	0.01	0.159	4.56992e-07	PGC	TSPYL6	-0.158607
1.96388e-11	-0.323572	0.015	0.162	4.61059e-07	PGC	MAGEC2	-0.323572
1.98215e-11	-0.608301	0	0.115	4.6535e-07	PGC	LINC02303	-0.608301
1.98216e-11	-0.323164	0	0.115	4.65351e-07	PGC	LHX8	-0.323164
2.03209e-11	0.232682	0.92	0.698	4.77074e-07	PGC	PSMB5	0.232682
2.04616e-11	-0.154519	0.005	0.148	4.80376e-07	PGC	ACSBG1	-0.154519
2.08185e-11	-0.309126	0.25	0.449	4.88756e-07	PGC	CDCA8	-0.309126
2.0822e-11	0.147647	0.32	0.116	4.88839e-07	PGC	OTOA	0.147647
2.09838e-11	0.20708	0.365	0.152	4.92636e-07	PGC	FRAT2	0.20708
2.16986e-11	0.251994	0.87	0.679	5.09418e-07	PGC	PHB	0.251994
2.17751e-11	-0.447011	0.545	0.654	5.11213e-07	PGC	MCRIP1	-0.447011
2.20677e-11	-0.259975	0.195	0.403	5.18083e-07	PGC	HYLS1	-0.259975
2.21321e-11	-0.375767	0.165	0.343	5.19596e-07	PGC	CNTRL	-0.375767
2.25401e-11	0.219067	0.955	0.797	5.29174e-07	PGC	UBE2I	0.219067
2.30568e-11	-0.510674	0.675	0.7	5.41305e-07	PGC	CCNB1	-0.510674
2.40399e-11	-0.2957	0.03	0.189	5.64384e-07	PGC	CRYBG3	-0.2957
2.44226e-11	0.262602	0.63	0.359	5.7337e-07	PGC	FAM221A	0.262602
2.60561e-11	0.0940901	0.195	0.036	6.11718e-07	PGC	ZAN	0.0940901
2.65483e-11	0.147314	0.28	0.088	6.23274e-07	PGC	ZC3HAV1	0.147314
2.67011e-11	0.14835	0.32	0.088	6.26862e-07	PGC	ELF3	0.14835
2.74423e-11	0.216077	0.815	0.493	6.44262e-07	PGC	SDC2	0.216077
2.81796e-11	-0.302805	0.16	0.338	6.61572e-07	PGC	DNALI1	-0.302805
2.81901e-11	-0.189927	0	0.113	6.61819e-07	PGC	CLGN	-0.189927
2.81901e-11	-0.628543	0	0.113	6.61819e-07	PGC	AC022113.1	-0.628543
2.82424e-11	0.226923	0.535	0.286	6.63048e-07	PGC	ILF3-DT	0.226923
2.87297e-11	0.242104	0.755	0.463	6.74488e-07	PGC	POP7	0.242104
2.87714e-11	-0.172309	0.015	0.158	6.75466e-07	PGC	CPE	-0.172309
2.91492e-11	-0.350866	0.22	0.402	6.84335e-07	PGC	PON3	-0.350866
3.04102e-11	-0.518433	0.435	0.53	7.13941e-07	PGC	TCTN1	-0.518433
3.14027e-11	0.154012	0.385	0.152	7.37241e-07	PGC	DHRS13	0.154012
3.20517e-11	-0.522145	0.93	0.887	7.52477e-07	PGC	GABARAPL2	-0.522145
3.21852e-11	-0.372391	0.105	0.261	7.55611e-07	PGC	HFM1	-0.372391
3.25941e-11	0.215012	0.805	0.542	7.65211e-07	PGC	RSU1	0.215012
3.29348e-11	-0.25226	0.11	0.299	7.7321e-07	PGC	PALLD	-0.25226
3.30545e-11	0.177214	0.385	0.169	7.7602e-07	PGC	MTFP1	0.177214
3.37163e-11	-0.762207	0.065	0.218	7.91559e-07	PGC	WFDC2	-0.762207
3.43633e-11	0.215407	0.74	0.468	8.06746e-07	PGC	MRPL11	0.215407
3.43697e-11	0.234181	0.905	0.701	8.06897e-07	PGC	REST	0.234181
3.51048e-11	-0.408295	0.45	0.554	8.24155e-07	PGC	NCBP3	-0.408295
3.57109e-11	-0.433814	0.51	0.614	8.38384e-07	PGC	CHID1	-0.433814
3.57712e-11	-0.295285	0.12	0.289	8.398e-07	PGC	COLEC11	-0.295285
3.58035e-11	-0.229431	0.05	0.229	8.4056e-07	PGC	DUSP9	-0.229431
3.66277e-11	0.212668	0.38	0.179	8.59908e-07	PGC	CRIP1	0.212668
3.68406e-11	0.256428	0.57	0.319	8.64907e-07	PGC	FLNA	0.256428
3.81082e-11	0.179335	0.435	0.198	8.94666e-07	PGC	AKAP1	0.179335
3.91579e-11	-0.212124	0.035	0.191	9.19309e-07	PGC	AC063977.6	-0.212124
3.98657e-11	-0.163263	0.03	0.201	9.35928e-07	PGC	DENND1B	-0.163263
4.00718e-11	-0.14701	0	0.112	9.40767e-07	PGC	DNAH12	-0.14701
4.00719e-11	-0.158614	0	0.112	9.40767e-07	PGC	ADORA2A-AS1	-0.158614
4.02819e-11	0.218658	0.755	0.488	9.45697e-07	PGC	BOLA3	0.218658
4.0438e-11	0.105784	0.12	0.022	9.49362e-07	PGC	TMEM51-AS1	0.105784
4.07171e-11	0.208825	0.545	0.296	9.55916e-07	PGC	ABCF3	0.208825
4.08812e-11	-0.252734	0.045	0.199	9.59767e-07	PGC	RIBC2	-0.252734
4.25805e-11	0.157281	0.37	0.146	9.99661e-07	PGC	SPOUT1	0.157281
4.41812e-11	0.129846	0.305	0.102	1.03724e-06	PGC	CAVIN1	0.129846
4.71576e-11	0.145622	0.36	0.132	1.10712e-06	PGC	PPP1R3B	0.145622
4.77673e-11	-0.214987	0	0.111	1.12143e-06	PGC	DYDC1	-0.214987
4.89365e-11	-0.562804	0.785	0.793	1.14888e-06	PGC	GYG1	-0.562804
4.98231e-11	0.230634	0.615	0.322	1.1697e-06	PGC	GEMIN6	0.230634
5.06949e-11	0.156284	0.3	0.112	1.19016e-06	PGC	SLC25A29	0.156284
5.15546e-11	-0.298416	0.09	0.272	1.21035e-06	PGC	LYST	-0.298416
5.183e-11	0.164953	0.535	0.233	1.21681e-06	PGC	TRIP10	0.164953
5.33824e-11	-0.444976	0.435	0.598	1.25326e-06	PGC	TRMT1L	-0.444976
5.48957e-11	0.237566	0.98	0.833	1.28879e-06	PGC	UQCRB	0.237566
5.49994e-11	-0.510664	0.495	0.6	1.29122e-06	PGC	ODC1	-0.510664
5.51269e-11	-0.302777	0.05	0.252	1.29421e-06	PGC	TKTL1	-0.302777
5.71562e-11	-0.365546	0.235	0.41	1.34186e-06	PGC	NBPF14	-0.365546
5.85239e-11	0.213524	0.385	0.155	1.37397e-06	PGC	LMO2	0.213524
5.85425e-11	-0.144531	0.03	0.198	1.3744e-06	PGC	PEA15	-0.144531
6.00209e-11	0.173166	0.415	0.202	1.40911e-06	PGC	NEU1	0.173166
6.0349e-11	0.225546	0.44	0.198	1.41681e-06	PGC	ZDHHC9	0.225546
6.13129e-11	0.190809	0.46	0.208	1.43944e-06	PGC	RAB29	0.190809
6.16892e-11	0.219475	0.89	0.662	1.44828e-06	PGC	PDCD2	0.219475
6.17595e-11	-0.466944	0.75	0.772	1.44993e-06	PGC	DYNC1LI1	-0.466944
6.25288e-11	-0.348524	0.54	0.635	1.46799e-06	PGC	CENPW	-0.348524
6.29387e-11	-0.215279	0.115	0.327	1.47761e-06	PGC	SPC25	-0.215279
6.34144e-11	-0.923535	0.74	0.76	1.48878e-06	PGC	MTRNR2L12	-0.923535
6.54019e-11	0.200581	0.965	0.836	1.53544e-06	PGC	SLC25A3	0.200581
6.74443e-11	0.415685	0.645	0.377	1.58339e-06	PGC	UTF1	0.415685
6.76497e-11	-0.24196	0.1	0.278	1.58821e-06	PGC	PRKAG2	-0.24196
6.78507e-11	-0.291711	0	0.109	1.59293e-06	PGC	PLEK2	-0.291711
6.78508e-11	-0.636067	0	0.109	1.59293e-06	PGC	IGHE	-0.636067
6.85967e-11	0.211403	0.74	0.455	1.61044e-06	PGC	NIP7	0.211403
6.87015e-11	0.19885	0.61	0.329	1.61291e-06	PGC	LTA4H	0.19885
7.01663e-11	-0.302161	0.16	0.352	1.64729e-06	PGC	VGLL4	-0.302161
7.248e-11	-0.504203	0.305	0.433	1.70161e-06	PGC	SLC25A4	-0.504203
7.46548e-11	-0.469933	0.685	0.715	1.75267e-06	PGC	PPP1R7	-0.469933
7.47497e-11	-0.366616	0.26	0.463	1.7549e-06	PGC	BRCA1	-0.366616
8.47918e-11	-0.532429	0.76	0.767	1.99066e-06	PGC	FBXO7	-0.532429
8.59105e-11	0.199783	0.495	0.265	2.01692e-06	PGC	C17orf58	0.199783
8.81036e-11	0.2264	0.935	0.729	2.06841e-06	PGC	IMPDH2	0.2264
8.8614e-11	0.220958	0.92	0.729	2.08039e-06	PGC	BRK1	0.220958
8.89542e-11	-0.282887	0.035	0.188	2.08838e-06	PGC	CCNB3	-0.282887
9.26372e-11	0.240087	0.81	0.574	2.17484e-06	PGC	SCAND1	0.240087
9.39475e-11	0.187194	0.5	0.268	2.20561e-06	PGC	BCL7A	0.187194
9.63315e-11	-0.113047	0	0.108	2.26158e-06	PGC	HOXB8	-0.113047
9.69709e-11	0.236553	0.765	0.526	2.27658e-06	PGC	COX16	0.236553
9.79359e-11	0.209649	0.85	0.612	2.29924e-06	PGC	NUDT5	0.209649
9.95813e-11	-0.238971	0.02	0.17	2.33787e-06	PGC	CLEC4C	-0.238971
1.12793e-10	-0.239257	0.03	0.18	2.64803e-06	PGC	DLX6	-0.239257
1.14634e-10	-0.283944	0.245	0.42	2.69126e-06	PGC	CYB5R2	-0.283944
1.17072e-10	0.223895	0.715	0.462	2.7485e-06	PGC	RAC3	0.223895
1.1844e-10	-0.186091	0.04	0.201	2.78061e-06	PGC	MEIS2	-0.186091
1.18476e-10	-0.372116	0.42	0.578	2.78146e-06	PGC	KLC1	-0.372116
1.18783e-10	0.249275	0.645	0.425	2.78867e-06	PGC	WDR54	0.249275
1.21688e-10	-0.347678	0.375	0.53	2.85687e-06	PGC	COQ7	-0.347678
1.25737e-10	0.126071	0.2	0.061	2.95194e-06	PGC	SOWAHD	0.126071
1.2617e-10	-0.250978	0.195	0.397	2.96208e-06	PGC	RTKN2	-0.250978
1.28409e-10	0.55499	0.47	0.237	3.01465e-06	PGC	RPS4Y1	0.55499
1.32488e-10	-0.244119	0.07	0.232	3.11042e-06	PGC	TIPARP	-0.244119
1.35849e-10	-0.456469	0.54	0.641	3.18933e-06	PGC	LZIC	-0.456469
1.36217e-10	0.159421	0.42	0.2	3.19798e-06	PGC	TTC27	0.159421
1.38846e-10	-0.0806581	0.005	0.117	3.25969e-06	PGC	FAM72B	-0.0806581
1.39464e-10	0.106343	0.135	0.022	3.27419e-06	PGC	TRIM38	0.106343
1.4139e-10	0.214444	0.705	0.438	3.31942e-06	PGC	RAB3GAP1	0.214444
1.45102e-10	-0.144724	0.04	0.195	3.40655e-06	PGC	IGDCC3	-0.144724
1.45862e-10	0.0971671	0.25	0.074	3.42441e-06	PGC	RAB3C	0.0971671
1.46413e-10	0.150171	0.28	0.082	3.43733e-06	PGC	ADTRP	0.150171
1.52914e-10	0.0744559	0.155	0.038	3.58997e-06	PGC	MSC	0.0744559
1.5951e-10	0.266262	0.795	0.593	3.74481e-06	PGC	TRAPPC4	0.266262
1.60225e-10	0.194534	0.6	0.344	3.76161e-06	PGC	DCTD	0.194534
1.61234e-10	-0.246483	0.165	0.358	3.78529e-06	PGC	PHF19	-0.246483
1.61658e-10	-0.198677	0.125	0.303	3.79524e-06	PGC	RAD51AP1	-0.198677
1.62397e-10	0.236279	0.97	0.782	3.81259e-06	PGC	ALDOA	0.236279
1.64507e-10	-0.384699	0.47	0.583	3.86212e-06	PGC	SLF1	-0.384699
1.73015e-10	-0.578618	0.675	0.657	4.06187e-06	PGC	SDF2L1	-0.578618
1.73159e-10	0.15972	0.345	0.136	4.06525e-06	PGC	DLK2	0.15972
1.75032e-10	-0.396971	0.51	0.627	4.10923e-06	PGC	DNM1L	-0.396971
1.76739e-10	-0.151953	0.005	0.118	4.14929e-06	PGC	RHOXF2	-0.151953
1.84055e-10	0.225795	0.775	0.555	4.32105e-06	PGC	NCBP2	0.225795
1.86499e-10	0.228414	0.63	0.368	4.37844e-06	PGC	RASGRP2	0.228414
1.9204e-10	-0.262395	0.155	0.357	4.50852e-06	PGC	KIF18A	-0.262395
1.93185e-10	-0.535075	0.52	0.567	4.5354e-06	PGC	PSMG4	-0.535075
1.95072e-10	-0.406005	0.53	0.592	4.57971e-06	PGC	RAMP2	-0.406005
2.04977e-10	-0.491313	0.995	0.965	4.81224e-06	PGC	SRP14	-0.491313
2.0987e-10	-0.397703	0.515	0.604	4.92711e-06	PGC	DCTN3	-0.397703
2.10475e-10	0.186687	0.41	0.175	4.94132e-06	PGC	CAPNS1	0.186687
2.12857e-10	-0.356259	0.38	0.514	4.99724e-06	PGC	SCYL1	-0.356259
2.15823e-10	0.151025	0.45	0.208	5.06688e-06	PGC	EML2	0.151025
2.25623e-10	-0.428131	0.36	0.51	5.29694e-06	PGC	MSL3	-0.428131
2.27613e-10	-0.328937	0.01	0.138	5.34367e-06	PGC	TUBA3C	-0.328937
2.2881e-10	-0.232266	0.02	0.165	5.37176e-06	PGC	USP2	-0.232266
2.31495e-10	0.13849	0.35	0.132	5.43482e-06	PGC	HLA-E	0.13849
2.38566e-10	-0.285202	0.12	0.31	5.60081e-06	PGC	PER3	-0.285202
2.39451e-10	0.158919	0.375	0.122	5.62159e-06	PGC	AC006329.1	0.158919
2.42805e-10	-0.439892	0.74	0.744	5.70033e-06	PGC	FAM204A	-0.439892
2.44135e-10	0.211669	0.9	0.704	5.73156e-06	PGC	TIMM13	0.211669
2.52959e-10	0.231792	0.895	0.653	5.93873e-06	PGC	PDHB	0.231792
2.64913e-10	-0.608474	0.725	0.733	6.21937e-06	PGC	PIGP	-0.608474
2.66851e-10	0.241645	0.895	0.688	6.26487e-06	PGC	PSMB6	0.241645
2.74899e-10	-0.460782	0	0.102	6.4538e-06	PGC	LINC01554	-0.460782
2.75956e-10	-0.313618	0.185	0.364	6.47861e-06	PGC	PEG3	-0.313618
2.76698e-10	0.2215	0.85	0.642	6.49605e-06	PGC	NSMCE1	0.2215
2.77328e-10	-0.45418	0.78	0.781	6.51082e-06	PGC	RPL39L	-0.45418
2.78341e-10	0.231705	0.68	0.4	6.53462e-06	PGC	C14orf119	0.231705
2.79009e-10	-0.437213	0.38	0.524	6.5503e-06	PGC	GLUL	-0.437213
2.79927e-10	0.203224	0.485	0.266	6.57186e-06	PGC	MAGEF1	0.203224
2.90217e-10	-0.272257	0.045	0.199	6.81342e-06	PGC	CDK3	-0.272257
2.94925e-10	-0.338361	0.39	0.541	6.92396e-06	PGC	ORC6	-0.338361
2.96945e-10	-0.459095	0.265	0.412	6.97137e-06	PGC	STX8	-0.459095
2.99315e-10	0.159093	0.46	0.226	7.02702e-06	PGC	ENO2	0.159093
3.11224e-10	0.228554	0.63	0.364	7.3066e-06	PGC	AP000547.3	0.228554
3.12885e-10	-0.248684	0.065	0.222	7.3456e-06	PGC	SH3GL2	-0.248684
3.19744e-10	-0.20308	0.11	0.285	7.50664e-06	PGC	AKT3	-0.20308
3.35035e-10	-0.215277	0.03	0.183	7.86563e-06	PGC	IGF2-1	-0.215277
3.4557e-10	0.223711	0.5	0.261	8.11295e-06	PGC	KLHL18	0.223711
3.46093e-10	0.139038	0.41	0.172	8.12523e-06	PGC	KTI12	0.139038
3.46979e-10	0.0914023	0.205	0.057	8.14602e-06	PGC	TP53	0.0914023
3.53257e-10	0.22932	0.96	0.794	8.29343e-06	PGC	XRCC5	0.22932
3.54975e-10	-0.255386	0.015	0.134	8.33375e-06	PGC	LINC01193	-0.255386
3.78215e-10	0.180259	0.59	0.298	8.87936e-06	PGC	PTDSS1	0.180259
3.84217e-10	0.192024	0.46	0.239	9.02026e-06	PGC	TAMM41	0.192024
3.85359e-10	0.226719	0.91	0.721	9.04708e-06	PGC	ATP5ME	0.226719
3.89556e-10	-0.12383	0	0.101	9.14562e-06	PGC	RBM44	-0.12383
3.89557e-10	-0.079314	0	0.101	9.14563e-06	PGC	DYNC1I1	-0.079314
3.89557e-10	-0.156262	0	0.101	9.14563e-06	PGC	LINC01030	-0.156262
3.97375e-10	0.231101	0.915	0.752	9.32917e-06	PGC	BTF3L4	0.231101
4.03401e-10	-0.409301	0.235	0.355	9.47064e-06	PGC	PRKACB	-0.409301
4.14805e-10	-0.352861	0.165	0.319	9.73839e-06	PGC	ZDHHC4	-0.352861
4.26021e-10	-0.675681	0.95	0.931	1.00017e-05	PGC	PDCD5	-0.675681
4.3511e-10	0.224224	0.83	0.602	1.02151e-05	PGC	MRPS7	0.224224
4.63225e-10	0.0801659	0.16	0.034	1.08751e-05	PGC	HOXB1	0.0801659
4.63655e-10	-0.267481	0	0.1	1.08852e-05	PGC	C18orf63	-0.267481
4.65089e-10	-0.215629	0.055	0.201	1.09189e-05	PGC	POMC	-0.215629
4.68462e-10	0.230777	0.915	0.765	1.09981e-05	PGC	RPL27A	0.230777
4.79923e-10	-0.219356	0.17	0.342	1.12671e-05	PGC	CENPM	-0.219356
4.89374e-10	0.139654	0.365	0.148	1.1489e-05	PGC	PRDM1	0.139654
4.90485e-10	0.139699	0.255	0.078	1.15151e-05	PGC	CGB8	0.139699
5.01286e-10	0.208707	0.585	0.339	1.17687e-05	PGC	KRTCAP3	0.208707
5.04577e-10	-0.216563	0.085	0.233	1.1846e-05	PGC	RUNDC3B	-0.216563
5.08266e-10	-0.541567	0.395	0.495	1.19326e-05	PGC	BEX3	-0.541567
5.09554e-10	-0.29088	0.3	0.466	1.19628e-05	PGC	TNIP2	-0.29088
5.12722e-10	-0.23971	0.11	0.29	1.20372e-05	PGC	FUCA2	-0.23971
5.49429e-10	0.22181	0.76	0.504	1.2899e-05	PGC	TMEM60	0.22181
5.57672e-10	-0.149507	0.03	0.174	1.30925e-05	PGC	NUP210	-0.149507
5.58665e-10	0.21985	0.745	0.524	1.31158e-05	PGC	PGLS	0.21985
5.69476e-10	-0.231183	0.105	0.275	1.33696e-05	PGC	RB1	-0.231183
5.7105e-10	-0.319696	0.205	0.366	1.34065e-05	PGC	NBPF26	-0.319696
5.80993e-10	-0.449078	0.26	0.41	1.364e-05	PGC	SELENOT	-0.449078
5.90117e-10	-0.529744	0.745	0.737	1.38542e-05	PGC	BRWD1	-0.529744
5.95686e-10	0.165417	0.535	0.258	1.39849e-05	PGC	LDLRAP1	0.165417
6.36886e-10	0.198643	0.965	0.876	1.49522e-05	PGC	RPL38	0.198643
6.40292e-10	-0.485567	0.65	0.652	1.50321e-05	PGC	DKC1	-0.485567
6.47455e-10	-0.332224	0.285	0.436	1.52003e-05	PGC	MUM1	-0.332224
6.47643e-10	0.264836	0.605	0.362	1.52047e-05	PGC	CNN2	0.264836
6.48675e-10	0.0869736	0.16	0.04	1.52289e-05	PGC	RPRML	0.0869736
6.69586e-10	0.222979	0.52	0.287	1.57199e-05	PGC	TRIM24	0.222979
7.02551e-10	-0.135183	0.01	0.138	1.64938e-05	PGC	LEKR1	-0.135183
7.04615e-10	-0.464898	0.72	0.749	1.65422e-05	PGC	KIF3A	-0.464898
7.14602e-10	-0.457058	0.72	0.743	1.67767e-05	PGC	TPGS2	-0.457058
7.34963e-10	0.227935	0.61	0.401	1.72547e-05	PGC	PGM1	0.227935
7.66053e-10	-0.367554	0.145	0.302	1.79846e-05	PGC	PNLDC1	-0.367554
7.75362e-10	-0.488075	0.755	0.757	1.82032e-05	PGC	RNF138	-0.488075
7.79523e-10	-0.281483	0.185	0.368	1.83009e-05	PGC	CEP295	-0.281483
7.94236e-10	0.178588	0.96	0.768	1.86463e-05	PGC	TMEM14C	0.178588
8.08585e-10	0.175493	0.585	0.332	1.89832e-05	PGC	TIGAR	0.175493
8.13739e-10	0.188417	0.325	0.131	1.91042e-05	PGC	FTX	0.188417
8.24128e-10	0.237216	0.865	0.672	1.9348e-05	PGC	TPM1	0.237216
8.30696e-10	-0.219049	0.055	0.221	1.95023e-05	PGC	GLCCI1	-0.219049
8.39395e-10	-0.234791	0.05	0.207	1.97065e-05	PGC	YBX2	-0.234791
8.53279e-10	0.10398	0.24	0.071	2.00324e-05	PGC	F2RL1	0.10398
8.55491e-10	-0.187625	0.11	0.322	2.00844e-05	PGC	CCNA2	-0.187625
8.61981e-10	-0.445146	0.46	0.562	2.02367e-05	PGC	GTF3C3	-0.445146
8.68479e-10	0.11446	0.255	0.078	2.03893e-05	PGC	SOX13	0.11446
8.70715e-10	0.166839	0.49	0.255	2.04418e-05	PGC	BPHL	0.166839
8.77636e-10	0.204362	0.92	0.71	2.06043e-05	PGC	EIF3M	0.204362
9.09142e-10	0.20939	0.67	0.406	2.13439e-05	PGC	PRR13	0.20939
9.28774e-10	-0.235891	0.07	0.218	2.18048e-05	PGC	GALNS	-0.235891
9.34625e-10	0.231327	0.505	0.273	2.19422e-05	PGC	SLC39A7	0.231327
9.62515e-10	-0.15342	0.015	0.162	2.2597e-05	PGC	IL13RA1	-0.15342
9.64657e-10	0.249659	0.76	0.566	2.26473e-05	PGC	PTPN2	0.249659
9.76038e-10	-0.244641	0.08	0.231	2.29144e-05	PGC	STAT1	-0.244641
9.99094e-10	0.207836	0.515	0.29	2.34557e-05	PGC	UQCRHL	0.207836
1.03683e-09	-0.307375	0.255	0.442	2.43417e-05	PGC	TRAPPC6B	-0.307375
1.0508e-09	0.239724	0.89	0.738	2.46697e-05	PGC	PKM	0.239724
1.05167e-09	-0.274657	0.205	0.372	2.46902e-05	PGC	MAPK8	-0.274657
1.08289e-09	0.162928	0.435	0.186	2.5423e-05	PGC	TET1	0.162928
1.0982e-09	0.161425	0.5	0.242	2.57825e-05	PGC	NR2F6	0.161425
1.10556e-09	-0.122898	0	0.096	2.59553e-05	PGC	DNAH7	-0.122898
1.10557e-09	-0.0844671	0	0.096	2.59554e-05	PGC	CAMK2B	-0.0844671
1.11283e-09	0.214213	0.735	0.478	2.6126e-05	PGC	NME4	0.214213
1.11821e-09	0.162242	0.45	0.198	2.62522e-05	PGC	PXDN	0.162242
1.12427e-09	0.207089	0.705	0.452	2.63944e-05	PGC	CD47	0.207089
1.13633e-09	-0.14372	0.005	0.11	2.66777e-05	PGC	TMEM255B	-0.14372
1.19956e-09	-0.0992134	0.005	0.121	2.81621e-05	PGC	DPP7	-0.0992134
1.20123e-09	-0.359481	0.39	0.519	2.82012e-05	PGC	IFT88	-0.359481
1.24413e-09	-0.455933	0.255	0.417	2.92083e-05	PGC	TMEM243	-0.455933
1.24618e-09	0.234946	0.775	0.569	2.92566e-05	PGC	BOLA2-SMG1P6	0.234946
1.25071e-09	-0.134767	0.005	0.115	2.9363e-05	PGC	NR2F1	-0.134767
1.26041e-09	0.217269	0.375	0.152	2.95907e-05	PGC	SOCS1	0.217269
1.2609e-09	-0.561202	0.815	0.785	2.96021e-05	PGC	BTG3	-0.561202
1.26165e-09	-0.213658	0.06	0.235	2.96199e-05	PGC	CCDC15	-0.213658
1.26359e-09	-0.141401	0.06	0.211	2.96654e-05	PGC	ELOVL1	-0.141401
1.285e-09	0.238003	0.905	0.729	3.01679e-05	PGC	SNRPC	0.238003
1.32367e-09	-0.502059	0.94	0.905	3.10759e-05	PGC	DNAJB6	-0.502059
1.38605e-09	-0.380386	0.09	0.235	3.25404e-05	PGC	COCH	-0.380386
1.39345e-09	0.0734985	0.145	0.032	3.2714e-05	PGC	ATP2B3	0.0734985
1.39504e-09	0.178125	0.475	0.286	3.27514e-05	PGC	MED20	0.178125
1.40076e-09	-0.221917	0.01	0.126	3.28856e-05	PGC	C9orf84	-0.221917
1.42502e-09	-0.393625	0.285	0.448	3.34552e-05	PGC	H2AFY	-0.393625
1.45313e-09	0.196086	0.585	0.363	3.41151e-05	PGC	TIMM8A	0.196086
1.46591e-09	0.212211	0.79	0.538	3.44151e-05	PGC	DDX27	0.212211
1.49125e-09	-0.229791	0.015	0.138	3.50101e-05	PGC	DNAH3	-0.229791
1.52e-09	0.137946	0.38	0.168	3.5685e-05	PGC	TPP1	0.137946
1.55141e-09	-0.369112	0.405	0.527	3.64225e-05	PGC	BRCA2	-0.369112
1.56388e-09	-0.529368	0	0.094	3.67153e-05	PGC	KPNA7	-0.529368
1.56389e-09	-0.418914	0	0.094	3.67153e-05	PGC	FAM167A-AS1	-0.418914
1.598e-09	0.222446	0.885	0.695	3.75164e-05	PGC	ATP5MD	0.222446
1.64594e-09	-0.202508	0.03	0.161	3.86416e-05	PGC	CDKL2	-0.202508
1.69091e-09	-0.17851	0.045	0.192	3.96974e-05	PGC	PENK	-0.17851
1.70976e-09	-0.434751	0.71	0.72	4.01401e-05	PGC	RSF1	-0.434751
1.71709e-09	0.168702	0.485	0.28	4.0312e-05	PGC	OSGEP	0.168702
1.72962e-09	-0.300975	0.255	0.412	4.06063e-05	PGC	SPA17	-0.300975
1.77613e-09	0.19485	0.925	0.744	4.16982e-05	PGC	ALKBH7	0.19485
1.78206e-09	-0.348173	0.35	0.479	4.18375e-05	PGC	STUB1	-0.348173
1.82159e-09	-0.17519	0.05	0.186	4.27655e-05	PGC	CDKL3	-0.17519
1.83338e-09	0.144215	0.35	0.116	4.30423e-05	PGC	LINC01198	0.144215
1.84188e-09	0.187823	0.71	0.463	4.32419e-05	PGC	ASH2L	0.187823
1.85852e-09	0.0876388	0.98	0.866	4.36324e-05	PGC	NPC2	0.0876388
1.85971e-09	-0.0796432	0	0.093	4.36604e-05	PGC	BOC	-0.0796432
1.91955e-09	0.201524	0.65	0.43	4.50653e-05	PGC	RNASEH1	0.201524
1.92233e-09	0.186892	0.97	0.746	4.51306e-05	PGC	NDUFB11	0.186892
1.98373e-09	0.16576	0.98	0.862	4.6572e-05	PGC	ATP5MG	0.16576
2.00309e-09	-0.223309	0.125	0.298	4.70266e-05	PGC	LTBP3	-0.223309
2.00315e-09	0.211999	0.805	0.498	4.70279e-05	PGC	BAMBI	0.211999
2.00966e-09	-0.395005	0.49	0.565	4.71809e-05	PGC	RBMX2	-0.395005
2.02558e-09	-0.302143	0.21	0.37	4.75546e-05	PGC	B3GALNT1	-0.302143
2.03119e-09	0.141473	0.32	0.139	4.76862e-05	PGC	BACE2	0.141473
2.03841e-09	0.182325	0.445	0.241	4.78558e-05	PGC	CHP1	0.182325
2.04047e-09	0.200957	0.87	0.623	4.79041e-05	PGC	ANAPC16	0.200957
2.06619e-09	-0.305171	0.035	0.154	4.85079e-05	PGC	CCDC172	-0.305171
2.18253e-09	-0.465391	0.775	0.767	5.12392e-05	PGC	BNIP3L	-0.465391
2.18476e-09	0.213415	0.945	0.798	5.12916e-05	PGC	RBM8A	0.213415
2.21126e-09	-0.063728	0	0.092	5.19136e-05	PGC	C1QTNF12	-0.063728
2.21584e-09	0.1328	0.345	0.135	5.20213e-05	PGC	MAVS	0.1328
2.24022e-09	-0.448192	0.38	0.517	5.25937e-05	PGC	PJA2	-0.448192
2.2551e-09	-0.470591	0.405	0.542	5.2943e-05	PGC	TRIP12	-0.470591
2.27042e-09	0.153581	0.3	0.11	5.33025e-05	PGC	TRIML2	0.153581
2.30491e-09	-0.448614	0.03	0.166	5.41125e-05	PGC	SPDYA	-0.448614
2.34093e-09	-0.315974	0.27	0.431	5.49579e-05	PGC	PARD3	-0.315974
2.40523e-09	-0.249346	0.195	0.362	5.64675e-05	PGC	TMEM107	-0.249346
2.40752e-09	0.0908374	0.195	0.059	5.65213e-05	PGC	HSBP1L1	0.0908374
2.43243e-09	0.0848105	0.16	0.043	5.71062e-05	PGC	CD53	0.0848105
2.44066e-09	-0.427124	0.245	0.383	5.72994e-05	PGC	AC084033.3	-0.427124
2.46386e-09	-0.43452	0.64	0.673	5.7844e-05	PGC	ARIH2	-0.43452
2.56359e-09	0.224218	0.58	0.301	6.01855e-05	PGC	LSR	0.224218
2.59807e-09	-0.257027	0.21	0.387	6.0995e-05	PGC	ASAP1	-0.257027
2.62897e-09	-0.0998153	0	0.092	6.17204e-05	PGC	AC126175.1	-0.0998153
2.62897e-09	-0.10153	0	0.092	6.17204e-05	PGC	XK	-0.10153
2.63555e-09	-0.189694	0.095	0.242	6.18749e-05	PGC	CCDC136	-0.189694
2.64404e-09	-0.532921	0.86	0.83	6.20742e-05	PGC	ROMO1	-0.532921
2.64817e-09	-0.290361	0.145	0.334	6.2171e-05	PGC	APIP	-0.290361
2.66541e-09	0.191112	0.615	0.385	6.25759e-05	PGC	FHL3	0.191112
2.66756e-09	-0.471037	0.01	0.104	6.26264e-05	PGC	UNC13C	-0.471037
2.67476e-09	0.195424	0.505	0.279	6.27954e-05	PGC	FOXN3	0.195424
2.69988e-09	0.145219	0.375	0.168	6.33852e-05	PGC	EFNA4	0.145219
2.84874e-09	-0.166424	0.025	0.144	6.68798e-05	PGC	AK1	-0.166424
2.90993e-09	-0.133007	0.025	0.152	6.83165e-05	PGC	LAG3	-0.133007
2.93265e-09	0.132814	0.405	0.175	6.88499e-05	PGC	UBQLN4	0.132814
2.98197e-09	-0.435751	0.905	0.887	7.00076e-05	PGC	DNAJA1	-0.435751
3.02642e-09	-0.265386	0.04	0.167	7.10512e-05	PGC	SH2D4A	-0.265386
3.06089e-09	0.161423	0.405	0.202	7.18605e-05	PGC	IFT172	0.161423
3.08242e-09	0.187642	0.545	0.305	7.23659e-05	PGC	SUCLG2	0.187642
3.09337e-09	0.196632	0.97	0.888	7.26229e-05	PGC	SAP18	0.196632
3.1377e-09	-0.1756	0.03	0.165	7.36638e-05	PGC	KCNQ2	-0.1756
3.24851e-09	0.100501	0.23	0.058	7.62653e-05	PGC	FLVCR2	0.100501
3.26797e-09	-0.288325	0.32	0.471	7.6722e-05	PGC	GNL1	-0.288325
3.30168e-09	0.127025	0.315	0.098	7.75136e-05	PGC	LIN28A	0.127025
3.31474e-09	-0.502499	0.75	0.741	7.78202e-05	PGC	HTATSF1	-0.502499
3.39492e-09	0.12767	0.37	0.144	7.97025e-05	PGC	ERBB3	0.12767
3.40074e-09	-0.273332	0.135	0.283	7.98391e-05	PGC	ECHDC3	-0.273332
3.45921e-09	-0.141782	0.05	0.192	8.12118e-05	PGC	INPP1	-0.141782
3.50078e-09	0.151171	0.515	0.184	8.21879e-05	PGC	A4GALT	0.151171
3.51614e-09	0.212065	0.855	0.636	8.25485e-05	PGC	RPP30	0.212065
3.55133e-09	-0.342327	0.015	0.134	8.33746e-05	PGC	TEX101	-0.342327
3.71488e-09	-0.138125	0	0.09	8.72143e-05	PGC	AC093151.3	-0.138125
3.76653e-09	-0.483693	0.705	0.699	8.84267e-05	PGC	BBX	-0.483693
3.77487e-09	-0.131705	0.02	0.135	8.86225e-05	PGC	SCT	-0.131705
3.77962e-09	-0.114901	0.005	0.115	8.87343e-05	PGC	ASB9	-0.114901
3.78663e-09	-0.494322	0.42	0.55	8.88986e-05	PGC	DCAF4L1	-0.494322
3.86124e-09	-0.248914	0.23	0.414	9.06504e-05	PGC	ANAPC2	-0.248914
3.88857e-09	0.155782	0.465	0.212	9.12919e-05	PGC	SH3BGRL	0.155782
3.90532e-09	-0.258887	0.26	0.441	9.16852e-05	PGC	CCDC18	-0.258887
4.03548e-09	-0.302126	0.05	0.171	9.47411e-05	PGC	FAM228A	-0.302126
4.04365e-09	0.148784	0.44	0.208	9.49328e-05	PGC	PIGBOS1	0.148784
4.09964e-09	0.218341	0.725	0.504	9.62473e-05	PGC	QSOX1	0.218341
4.11113e-09	-0.361628	0.305	0.449	9.6517e-05	PGC	SPDL1	-0.361628
4.11127e-09	0.168947	0.595	0.358	9.65202e-05	PGC	NMT1	0.168947
4.1335e-09	-0.352716	0.095	0.229	9.70422e-05	PGC	KRT19	-0.352716
4.28933e-09	-0.487149	0.675	0.696	0.000100701	PGC	KIF5B	-0.487149
4.32835e-09	0.21799	0.685	0.481	0.000101617	PGC	TYW3	0.21799
4.34841e-09	0.141088	0.4	0.2	0.000102088	PGC	DPAGT1	0.141088
4.41527e-09	-0.109368	0	0.089	0.000103657	PGC	EYA2	-0.109368
4.41527e-09	-0.37922	0	0.089	0.000103657	PGC	CTRB2	-0.37922
4.45796e-09	-0.130696	0.015	0.153	0.000104659	PGC	CGREF1	-0.130696
4.47703e-09	-0.230896	0.1	0.259	0.000105107	PGC	NOTCH2	-0.230896
4.65872e-09	0.161469	0.995	0.968	0.000109373	PGC	ACTG1	0.161469
4.76947e-09	-0.248652	0.26	0.444	0.000111973	PGC	HAUS8	-0.248652
4.90294e-09	0.124557	0.315	0.105	0.000115106	PGC	SLC37A3	0.124557
4.93395e-09	-0.972237	0.01	0.116	0.000115834	PGC	RAD51AP2	-0.972237
4.96536e-09	-0.456459	0.51	0.602	0.000116572	PGC	YPEL5	-0.456459
4.98665e-09	0.155909	0.355	0.155	0.000117071	PGC	ZNF791	0.155909
4.99529e-09	-0.129056	0.03	0.162	0.000117274	PGC	CACNB4	-0.129056
5.09291e-09	0.13154	0.335	0.114	0.000119566	PGC	ARL6IP5	0.13154
5.11086e-09	-0.445029	0.6	0.642	0.000119988	PGC	UBE2A	-0.445029
5.21126e-09	-0.223348	0.11	0.279	0.000122345	PGC	LPGAT1	-0.223348
5.29988e-09	-0.20422	0.095	0.236	0.000124425	PGC	PAM	-0.20422
5.35477e-09	0.130031	0.445	0.156	0.000125714	PGC	CDH3	0.130031
5.36222e-09	-0.305991	0.3	0.443	0.000125889	PGC	PCOLCE2	-0.305991
5.39781e-09	0.177533	0.615	0.341	0.000126724	PGC	IFITM3	0.177533
5.45169e-09	-0.156322	0.005	0.117	0.000127989	PGC	TUBA3E	-0.156322
5.60238e-09	-0.143216	0.03	0.167	0.000131527	PGC	HOXA3	-0.143216
5.69018e-09	-0.120217	0.015	0.129	0.000133588	PGC	SULT2B1	-0.120217
5.72054e-09	-0.414742	0.44	0.543	0.000134301	PGC	CLSPN	-0.414742
5.73647e-09	0.140163	0.365	0.156	0.000134675	PGC	PIGL	0.140163
5.79228e-09	-0.243691	0.215	0.378	0.000135985	PGC	HRASLS	-0.243691
5.79246e-09	-0.242282	0.21	0.349	0.00013599	PGC	ELK1	-0.242282
5.79749e-09	0.123021	0.235	0.093	0.000136108	PGC	CD7	0.123021
5.8042e-09	-0.463027	0.73	0.741	0.000136265	PGC	SH3GLB1	-0.463027
5.83722e-09	-0.453076	0.58	0.642	0.00013704	PGC	KIFAP3	-0.453076
5.89404e-09	-0.245833	0.155	0.312	0.000138374	PGC	DGKE	-0.245833
6.00978e-09	0.155429	0.48	0.232	0.000141092	PGC	MAP4K1	0.155429
6.07797e-09	0.0484767	0.095	0.017	0.000142693	PGC	AL606491.1	0.0484767
6.09081e-09	-0.274185	0.195	0.338	0.000142994	PGC	RALGPS2	-0.274185
6.09933e-09	-0.107421	0.035	0.153	0.000143194	PGC	AC010894.2	-0.107421
6.17322e-09	-0.2768	0.345	0.499	0.000144929	PGC	THUMPD3	-0.2768
6.23119e-09	0.183001	0.73	0.459	0.00014629	PGC	GOSR1	0.183001
6.24021e-09	0.105631	0.245	0.079	0.000146501	PGC	FNDC5	0.105631
6.30306e-09	-0.185945	0.1	0.249	0.000147977	PGC	CYREN	-0.185945
6.43571e-09	-0.327625	0.345	0.452	0.000151091	PGC	TSEN15	-0.327625
6.62459e-09	-0.349578	0.35	0.461	0.000155526	PGC	PNPLA4	-0.349578
6.64729e-09	0.192071	0.895	0.697	0.000156058	PGC	HAX1	0.192071
6.75505e-09	-0.0936057	0.015	0.138	0.000158588	PGC	PARVB	-0.0936057
6.80959e-09	-0.248279	0.165	0.312	0.000159869	PGC	ZNF267	-0.248279
6.86123e-09	-0.16531	0.02	0.13	0.000161081	PGC	CLIP4	-0.16531
6.89945e-09	0.160448	0.55	0.288	0.000161978	PGC	FAM118A	0.160448
6.92372e-09	0.145584	0.38	0.183	0.000162548	PGC	NNT-AS1	0.145584
6.93353e-09	-0.227467	0.01	0.109	0.000162778	PGC	CNTD1	-0.227467
7.02323e-09	0.178995	0.765	0.54	0.000164884	PGC	IMP4	0.178995
7.0342e-09	-0.22341	0.2	0.351	0.000165142	PGC	M1AP	-0.22341
7.04947e-09	-0.225954	0.11	0.275	0.0001655	PGC	SESN3	-0.225954
7.08196e-09	-0.262635	0.15	0.308	0.000166263	PGC	GATM	-0.262635
7.19482e-09	0.125004	0.365	0.156	0.000168913	PGC	PITPNC1	0.125004
7.28364e-09	-0.221615	0.025	0.152	0.000170998	PGC	UHRF1	-0.221615
7.35351e-09	0.213056	0.865	0.684	0.000172638	PGC	NOP53	0.213056
7.37055e-09	-0.353367	0.35	0.493	0.000173038	PGC	HCCS	-0.353367
7.3835e-09	-0.139802	0.03	0.142	0.000173342	PGC	REEP2	-0.139802
7.58471e-09	-0.190126	0.005	0.11	0.000178066	PGC	LINC01511	-0.190126
7.59145e-09	0.194163	0.52	0.306	0.000178225	PGC	RSAD1	0.194163
7.63708e-09	-0.274943	0.3	0.429	0.000179296	PGC	NUP88	-0.274943
7.78648e-09	-0.119668	0.015	0.141	0.000182803	PGC	ZEB2	-0.119668
7.93407e-09	-0.165905	0.035	0.155	0.000186268	PGC	DZIP1	-0.165905
7.96387e-09	0.169373	0.425	0.201	0.000186968	PGC	ORAI1	0.169373
7.98928e-09	-0.358342	0.4	0.533	0.000187564	PGC	RBL2	-0.358342
8.11049e-09	-0.327336	0.425	0.54	0.00019041	PGC	LBR	-0.327336
8.23176e-09	0.211953	0.645	0.402	0.000193257	PGC	CXXC5	0.211953
8.32611e-09	0.200601	0.865	0.654	0.000195472	PGC	SRP72	0.200601
8.473e-09	-0.232264	0.125	0.273	0.000198921	PGC	ZNF672	-0.232264
8.50848e-09	0.128358	0.325	0.142	0.000199754	PGC	ELOVL3	0.128358
8.58322e-09	0.211008	0.74	0.492	0.000201508	PGC	RPL7L1	0.211008
8.74957e-09	0.112934	0.275	0.104	0.000205414	PGC	STK10	0.112934
8.76929e-09	0.180815	0.935	0.712	0.000205877	PGC	MRPL41	0.180815
9.13841e-09	0.189822	0.615	0.399	0.000214543	PGC	RPP14	0.189822
9.19305e-09	0.0717392	0.165	0.038	0.000215825	PGC	UMODL1	0.0717392
9.28538e-09	-0.134581	0.03	0.166	0.000217993	PGC	AGAP3	-0.134581
9.55203e-09	0.181385	0.69	0.446	0.000224253	PGC	ISOC2	0.181385
9.6944e-09	-0.229801	0.135	0.317	0.000227595	PGC	MINDY3	-0.229801
9.8026e-09	-0.449524	0.515	0.559	0.000230136	PGC	KLHL35	-0.449524
9.89657e-09	0.171718	0.42	0.199	0.000232342	PGC	MDFI	0.171718
1.00006e-08	-0.0708791	0.005	0.112	0.000234785	PGC	ZSWIM6	-0.0708791
1.01155e-08	-0.183703	0.005	0.105	0.000237482	PGC	EPSTI1	-0.183703
1.02621e-08	-0.279993	0.105	0.252	0.000240924	PGC	ZCCHC9	-0.279993
1.04965e-08	-0.23725	0.09	0.231	0.000246426	PGC	C16orf95	-0.23725
1.05551e-08	-0.447798	0.27	0.392	0.000247802	PGC	MED16	-0.447798
1.06522e-08	0.124558	0.35	0.144	0.000250083	PGC	GCNT1	0.124558
1.07333e-08	0.095452	0.245	0.071	0.000251987	PGC	PPP2R5B	0.095452
1.07438e-08	-0.330752	0.415	0.522	0.000252232	PGC	CDC16	-0.330752
1.07867e-08	0.105175	0.16	0.043	0.000253239	PGC	IQCF1	0.105175
1.08303e-08	-0.248845	0.11	0.242	0.000254262	PGC	FBXO5	-0.248845
1.1073e-08	0.216397	0.69	0.498	0.00025996	PGC	GNL3	0.216397
1.12579e-08	0.184225	0.93	0.748	0.000264301	PGC	CYCS	0.184225
1.13509e-08	0.15522	0.435	0.181	0.000266485	PGC	TCP11L1	0.15522
1.14393e-08	-0.142103	0.04	0.174	0.000268562	PGC	LTBP1	-0.142103
1.14905e-08	0.129169	0.285	0.114	0.000269763	PGC	ARHGAP28	0.129169
1.16011e-08	-0.447973	0.35	0.434	0.00027236	PGC	ARHGEF33	-0.447973
1.17051e-08	-0.391847	0.555	0.637	0.000274801	PGC	MCM6	-0.391847
1.18245e-08	0.137871	0.37	0.163	0.000277605	PGC	RNF125	0.137871
1.1834e-08	0.180696	0.43	0.215	0.000277826	PGC	FMN2	0.180696
1.20308e-08	0.159333	0.615	0.356	0.000282447	PGC	ILK	0.159333
1.20777e-08	0.161235	0.56	0.323	0.000283548	PGC	VRK2	0.161235
1.2148e-08	-0.354739	0.57	0.634	0.000285198	PGC	OOEP	-0.354739
1.22775e-08	0.169308	0.44	0.238	0.000288239	PGC	CPSF4	0.169308
1.25583e-08	0.196778	0.715	0.472	0.000294832	PGC	TIMM9	0.196778
1.26483e-08	0.155692	0.475	0.192	0.000296943	PGC	ASS1	0.155692
1.26698e-08	-0.473744	0.68	0.698	0.000297449	PGC	TOMM34	-0.473744
1.28309e-08	0.181993	0.94	0.723	0.000301231	PGC	PSMD4	0.181993
1.30765e-08	-0.307958	0.125	0.26	0.000306997	PGC	TOB1	-0.307958
1.31776e-08	0.153764	0.99	0.946	0.000309371	PGC	SUMO2	0.153764
1.33217e-08	0.229367	0.955	0.839	0.000312753	PGC	ITM2B	0.229367
1.34321e-08	0.194316	0.75	0.545	0.000315345	PGC	LRRC59	0.194316
1.37711e-08	-0.208314	0.08	0.219	0.000323305	PGC	ANKRD50	-0.208314
1.39588e-08	-0.449172	0.85	0.778	0.00032771	PGC	RDX	-0.449172
1.39601e-08	-0.376972	0.59	0.64	0.000327741	PGC	MRPL28	-0.376972
1.41542e-08	-0.29626	0.2	0.361	0.000332298	PGC	EHMT2	-0.29626
1.41653e-08	0.202102	0.81	0.586	0.000332559	PGC	PUM3	0.202102
1.46808e-08	-0.120825	0.03	0.172	0.000344662	PGC	HOXB6	-0.120825
1.47778e-08	0.0885314	0.21	0.061	0.000346938	PGC	TIMP4	0.0885314
1.49208e-08	-0.149222	0.015	0.14	0.000350295	PGC	HOXA4	-0.149222
1.55485e-08	0.190185	0.85	0.617	0.000365033	PGC	LMAN1	0.190185
1.55615e-08	0.232632	0.755	0.535	0.000365337	PGC	GRINA	0.232632
1.56017e-08	0.107733	0.21	0.074	0.000366282	PGC	SPSB2	0.107733
1.56752e-08	-0.230575	0.165	0.319	0.000368007	PGC	MLLT3	-0.230575
1.59668e-08	0.155693	0.575	0.336	0.000374853	PGC	CTDNEP1	0.155693
1.60382e-08	-0.342808	0.45	0.556	0.000376529	PGC	RFC3	-0.342808
1.60875e-08	-0.640011	0.775	0.768	0.000377685	PGC	DNAJB1	-0.640011
1.62348e-08	-0.320611	0.005	0.094	0.000381145	PGC	GDF9	-0.320611
1.64722e-08	0.126323	0.36	0.158	0.000386719	PGC	ADD2	0.126323
1.66433e-08	0.174705	0.53	0.258	0.000390735	PGC	PPP1R15A	0.174705
1.6677e-08	-0.101668	0.01	0.123	0.000391525	PGC	BOK	-0.101668
1.67865e-08	0.118094	0.67	0.298	0.000394096	PGC	DPPA3	0.118094
1.68344e-08	-0.352517	0.34	0.458	0.000395222	PGC	NKIRAS1	-0.352517
1.71326e-08	-0.439874	0.735	0.768	0.000402223	PGC	GDI1	-0.439874
1.71688e-08	0.152336	0.38	0.183	0.000403072	PGC	CHM	0.152336
1.72575e-08	-0.295568	0.24	0.403	0.000405153	PGC	NSD2	-0.295568
1.72668e-08	-0.107047	0.015	0.119	0.000405372	PGC	CCSER1	-0.107047
1.73207e-08	-0.406079	0.6	0.653	0.000406638	PGC	UAP1	-0.406079
1.74007e-08	0.201397	0.875	0.686	0.000408517	PGC	EMC6	0.201397
1.7515e-08	-0.252956	0.1	0.253	0.0004112	PGC	GPAT2	-0.252956
1.75181e-08	-0.0926991	0	0.082	0.000411273	PGC	SLCO4A1	-0.0926991
1.75181e-08	-0.071806	0	0.082	0.000411273	PGC	PCDH11X	-0.071806
1.75412e-08	-0.227633	0.11	0.266	0.000411815	PGC	TMEM54	-0.227633
1.76676e-08	-0.126056	0.025	0.148	0.000414781	PGC	MEIS1	-0.126056
1.77708e-08	-0.104559	0.01	0.113	0.000417205	PGC	DACH1	-0.104559
1.78922e-08	-0.243563	0.125	0.258	0.000420055	PGC	TSPYL5	-0.243563
1.8197e-08	-0.086893	0.01	0.119	0.000427212	PGC	ACTN2	-0.086893
1.82364e-08	-0.258261	0.32	0.472	0.000428136	PGC	EVI5	-0.258261
1.8376e-08	-0.35908	0.29	0.368	0.000431415	PGC	NUSAP1	-0.35908
1.86548e-08	0.166145	0.86	0.635	0.000437959	PGC	PTRHD1	0.166145
1.89554e-08	-0.187951	0.05	0.198	0.000445016	PGC	EPS8	-0.187951
1.8977e-08	-0.232171	0.025	0.141	0.000445524	PGC	SKAP1	-0.232171
1.9052e-08	0.0657591	0.135	0.025	0.000447283	PGC	LDHD	0.0657591
1.91904e-08	0.193249	0.72	0.477	0.000450534	PGC	PPT1	0.193249
1.92215e-08	0.182157	0.68	0.461	0.000451262	PGC	MRPS36	0.182157
1.92876e-08	-0.0746198	0.01	0.106	0.000452816	PGC	COL7A1	-0.0746198
1.97752e-08	0.174392	0.44	0.231	0.000464263	PGC	RAB20	0.174392
2.00457e-08	0.107308	0.305	0.109	0.000470613	PGC	MDP1	0.107308
2.01647e-08	-0.174659	0.06	0.212	0.000473406	PGC	GAMT	-0.174659
2.09384e-08	0.166501	0.95	0.805	0.00049157	PGC	UQCR10	0.166501
2.09621e-08	-0.412179	0.825	0.795	0.000492128	PGC	U2SURP	-0.412179
2.15894e-08	0.187468	0.805	0.588	0.000506854	PGC	GTF2I	0.187468
2.19181e-08	-0.155148	0.045	0.174	0.00051457	PGC	BMPR1B	-0.155148
2.20993e-08	0.191303	0.875	0.658	0.000518825	PGC	TMEM14A	0.191303
2.21254e-08	0.186046	0.71	0.462	0.000519437	PGC	PTPN12	0.186046
2.21334e-08	-0.147213	0.025	0.135	0.000519625	PGC	CCDC36	-0.147213
2.28709e-08	0.245998	0.7	0.473	0.00053694	PGC	FBLN1	0.245998
2.29214e-08	0.184596	0.835	0.652	0.000538126	PGC	RNF214	0.184596
2.29575e-08	-0.370798	0.165	0.312	0.000538974	PGC	ANKRD7	-0.370798
2.30173e-08	0.179733	0.77	0.567	0.000540377	PGC	SMIM26	0.179733
2.30508e-08	-0.156389	0.05	0.182	0.000541163	PGC	MBOAT2	-0.156389
2.32704e-08	0.143157	0.46	0.256	0.000546319	PGC	AL355338.1	0.143157
2.42895e-08	0.157381	0.465	0.254	0.000570244	PGC	SORBS3	0.157381
2.44602e-08	0.19391	0.86	0.649	0.000574251	PGC	NIFK	0.19391
2.47221e-08	0.173381	0.8	0.551	0.000580402	PGC	CMC1	0.173381
2.50814e-08	-0.236564	0.13	0.263	0.000588835	PGC	PRR19	-0.236564
2.51437e-08	-0.159015	0.06	0.202	0.0005903	PGC	C5orf63	-0.159015
2.5174e-08	0.178597	0.64	0.422	0.00059101	PGC	TMX2	0.178597
2.53328e-08	-0.141791	0.005	0.098	0.000594738	PGC	NUP62CL	-0.141791
2.54654e-08	0.206718	0.82	0.598	0.000597851	PGC	EIF6	0.206718
2.58499e-08	-0.22239	0.005	0.099	0.000606878	PGC	AL365184.1	-0.22239
2.59328e-08	0.161099	0.385	0.205	0.000608825	PGC	ZDHHC12	0.161099
2.59818e-08	-0.140763	0.045	0.226	0.000609974	PGC	FOXM1	-0.140763
2.61402e-08	-0.446131	0.955	0.92	0.000613694	PGC	TRMT112	-0.446131
2.62923e-08	-0.466625	0.96	0.922	0.000617264	PGC	MORF4L1	-0.466625
2.63149e-08	-0.295801	0.1	0.25	0.000617794	PGC	ZFP36L1	-0.295801
2.65195e-08	-0.259645	0.255	0.398	0.000622598	PGC	GNAI1	-0.259645
2.67962e-08	0.150838	0.305	0.15	0.000629095	PGC	JADE2	0.150838
2.6924e-08	-0.139321	0.055	0.188	0.000632096	PGC	DENND6B	-0.139321
2.72322e-08	0.157612	0.615	0.353	0.000639329	PGC	GPAT4	0.157612
2.75338e-08	-0.257905	0.09	0.234	0.00064641	PGC	HOOK1	-0.257905
2.77641e-08	-0.127922	0.005	0.103	0.000651819	PGC	AP005482.1	-0.127922
2.85314e-08	-0.216787	0.035	0.182	0.000669832	PGC	TERB1	-0.216787
2.87631e-08	-0.288812	0.21	0.343	0.000675271	PGC	DMXL2	-0.288812
2.91809e-08	-0.320339	0.5	0.598	0.000685081	PGC	AIFM1	-0.320339
2.94557e-08	-0.3878	0.765	0.766	0.000691531	PGC	SRP54	-0.3878
3.00043e-08	0.111251	0.335	0.134	0.00070441	PGC	TNFAIP1	0.111251
3.04196e-08	-0.376427	0.34	0.472	0.000714161	PGC	HSPA4L	-0.376427
3.05541e-08	0.167175	0.795	0.557	0.000717319	PGC	EMC10	0.167175
3.06514e-08	-0.384607	0.645	0.652	0.000719603	PGC	CCNB2	-0.384607
3.14976e-08	-0.489469	0.21	0.336	0.00073947	PGC	POLR2M	-0.489469
3.16166e-08	-0.37504	0.625	0.68	0.000742263	PGC	MCM3	-0.37504
3.20494e-08	0.118743	0.315	0.122	0.000752424	PGC	ALDH4A1	0.118743
3.26367e-08	0.17362	0.5	0.282	0.000766212	PGC	LHFPL6	0.17362
3.31395e-08	0.14357	0.51	0.256	0.000778016	PGC	PYGL	0.14357
3.31958e-08	0.17158	0.55	0.335	0.000779338	PGC	ALG2	0.17158
3.32712e-08	-0.515753	0.495	0.542	0.000781108	PGC	AAMDC	-0.515753
3.44058e-08	-0.368072	0.34	0.471	0.000807746	PGC	TBL1XR1	-0.368072
3.48542e-08	-0.329098	0.355	0.468	0.000818272	PGC	CCNO	-0.329098
3.51271e-08	-0.325884	0.455	0.545	0.000824678	PGC	ERCC3	-0.325884
3.58897e-08	0.151909	0.36	0.164	0.000842583	PGC	ADAMTS12	0.151909
3.62409e-08	-0.2798	0.22	0.378	0.000850827	PGC	AL354920.1	-0.2798
3.67046e-08	-0.283644	0.01	0.103	0.000861714	PGC	VCX3A	-0.283644
3.6786e-08	-0.138289	0.045	0.18	0.000863625	PGC	ELOVL2	-0.138289
3.68078e-08	-0.256568	0.155	0.291	0.000864136	PGC	DNAJA4	-0.256568
3.72288e-08	0.266214	0.355	0.148	0.00087402	PGC	MYL9	0.266214
3.88036e-08	0.143373	0.47	0.262	0.000910991	PGC	YARS2	0.143373
3.89777e-08	-0.44695	0.935	0.868	0.00091508	PGC	SRRM1	-0.44695
3.91476e-08	-0.165722	0.08	0.199	0.000919068	PGC	SPATA4	-0.165722
3.95827e-08	-0.415425	0.8	0.768	0.000929283	PGC	TALDO1	-0.415425
3.96001e-08	-0.256528	0.04	0.157	0.000929692	PGC	PTPRK	-0.256528
3.97414e-08	-0.230974	0.065	0.206	0.000933009	PGC	LDHC	-0.230974
3.98295e-08	-0.394148	0.655	0.692	0.000935078	PGC	PABPC4	-0.394148
4.07423e-08	0.168978	0.5	0.288	0.000956506	PGC	SARS2	0.168978
4.13552e-08	0.108682	0.295	0.128	0.000970897	PGC	KANK4	0.108682
4.17314e-08	-0.413037	0.525	0.582	0.000979728	PGC	UBE2E1	-0.413037
4.26286e-08	-0.165254	0.045	0.18	0.00100079	PGC	AURKC	-0.165254
4.27992e-08	0.094665	0.14	0.037	0.0010048	PGC	LIM2	0.094665
4.29292e-08	0.112547	0.175	0.052	0.00100785	PGC	SH3TC1	0.112547
4.30557e-08	-0.140542	0.005	0.1	0.00101082	PGC	ADCY9	-0.140542
4.41731e-08	-0.622216	0.36	0.459	0.00103705	PGC	C8orf88	-0.622216
4.42133e-08	-0.446689	0.255	0.371	0.00103799	PGC	TRAF2	-0.446689
4.44645e-08	0.206849	0.72	0.482	0.00104389	PGC	EIF4A1	0.206849
4.50742e-08	-0.250988	0.235	0.362	0.00105821	PGC	AURKA	-0.250988
4.54432e-08	-0.220758	0.15	0.318	0.00106687	PGC	USP31	-0.220758
4.6244e-08	-0.133296	0.04	0.18	0.00108567	PGC	MPP1	-0.133296
4.80745e-08	-0.578744	0.595	0.631	0.00112865	PGC	DZIP3	-0.578744
4.84591e-08	0.16322	0.49	0.292	0.00113767	PGC	ZNF296	0.16322
4.90518e-08	-0.19473	0	0.078	0.00115159	PGC	NPM2	-0.19473
4.90519e-08	-0.161833	0	0.078	0.00115159	PGC	ZAR1	-0.161833
4.96281e-08	0.182275	0.345	0.188	0.00116512	PGC	PQLC1	0.182275
4.98054e-08	0.0933582	0.265	0.103	0.00116928	PGC	LURAP1	0.0933582
4.98506e-08	-0.706912	0.26	0.369	0.00117034	PGC	SERPINF1	-0.706912
5.00087e-08	-0.390201	0.575	0.644	0.00117405	PGC	ATP6V0D1	-0.390201
5.02731e-08	0.110654	0.35	0.163	0.00118026	PGC	TMEM177	0.110654
5.06449e-08	0.124622	0.37	0.169	0.00118899	PGC	NVL	0.124622
5.07803e-08	0.168598	0.485	0.274	0.00119217	PGC	CCDC43	0.168598
5.18007e-08	0.0967828	0.155	0.038	0.00121613	PGC	TTTY15	0.0967828
5.18037e-08	-0.367435	0.605	0.66	0.00121619	PGC	SUPT20H	-0.367435
5.19663e-08	-0.233087	0.225	0.391	0.00122001	PGC	PKN1	-0.233087
5.28872e-08	-0.190697	0.035	0.142	0.00124163	PGC	CCDC110	-0.190697
5.39311e-08	-0.153968	0.08	0.253	0.00126614	PGC	ZNF723	-0.153968
5.41146e-08	-0.361952	0.515	0.568	0.00127045	PGC	PIGH	-0.361952
5.49529e-08	-0.153915	0.13	0.285	0.00129013	PGC	DDIAS	-0.153915
5.51378e-08	0.12986	0.38	0.178	0.00129447	PGC	PTPN11	0.12986
5.56021e-08	0.106079	0.295	0.129	0.00130537	PGC	QPRT	0.106079
5.59221e-08	-0.440713	0.635	0.616	0.00131288	PGC	CALCOCO2	-0.440713
5.59526e-08	0.204022	0.72	0.513	0.0013136	PGC	IGBP1	0.204022
5.59675e-08	-0.157069	0.135	0.296	0.00131395	PGC	TROAP	-0.157069
5.6604e-08	-0.0796845	0.005	0.108	0.00132889	PGC	EDIL3	-0.0796845
5.7336e-08	-0.328874	0.42	0.545	0.00134608	PGC	PIWIL2	-0.328874
5.74361e-08	-0.180845	0.04	0.173	0.00134843	PGC	KLHDC9	-0.180845
5.78877e-08	0.164257	0.88	0.639	0.00135903	PGC	CACUL1	0.164257
5.83694e-08	0.177352	0.66	0.463	0.00137034	PGC	CHCHD5	0.177352
5.86406e-08	-0.356406	0.6	0.645	0.00137671	PGC	RAD51C	-0.356406
5.90666e-08	-0.345261	0.575	0.639	0.00138671	PGC	ABHD10	-0.345261
6.00026e-08	0.109166	0.305	0.124	0.00140868	PGC	LRP10	0.109166
6.09064e-08	-0.19467	0.06	0.183	0.0014299	PGC	CADPS2	-0.19467
6.1495e-08	-0.485148	0.94	0.898	0.00144372	PGC	DDX24	-0.485148
6.17933e-08	-0.150353	0.04	0.156	0.00145072	PGC	CNKSR2	-0.150353
6.21589e-08	-0.0829891	0.005	0.094	0.0014593	PGC	RNF157	-0.0829891
6.26575e-08	0.159164	0.4	0.179	0.00147101	PGC	EPHB4	0.159164
6.43732e-08	-0.178495	0.105	0.248	0.00151129	PGC	EPHX2	-0.178495
6.47311e-08	0.138962	0.585	0.321	0.00151969	PGC	C1GALT1C1	0.138962
6.53129e-08	-0.258414	0.265	0.408	0.00153335	PGC	PNPLA2	-0.258414
6.5832e-08	0.0965693	0.28	0.094	0.00154554	PGC	NOS3	0.0965693
6.65782e-08	-0.254686	0.055	0.182	0.00156306	PGC	CCNE2	-0.254686
6.87819e-08	0.147097	0.4	0.177	0.00161479	PGC	CPT1A	0.147097
6.90881e-08	-0.133473	0	0.076	0.00162198	PGC	BOLL	-0.133473
7.02217e-08	-0.40416	0.355	0.46	0.0016486	PGC	TXNIP	-0.40416
7.13123e-08	-0.139984	0.015	0.122	0.0016742	PGC	LRCH2	-0.139984
7.14889e-08	0.163478	0.53	0.292	0.00167834	PGC	ZNF729	0.163478
7.22866e-08	-0.266269	0.335	0.468	0.00169707	PGC	ARHGAP21	-0.266269
7.22926e-08	0.139835	0.455	0.237	0.00169721	PGC	NFKBIB	0.139835
7.24109e-08	-0.201311	0.025	0.133	0.00169999	PGC	FBXO47	-0.201311
7.24383e-08	-0.32265	0.445	0.547	0.00170064	PGC	CREG1	-0.32265
7.29241e-08	-0.135577	0.005	0.086	0.00171204	PGC	CCDC42	-0.135577
7.29726e-08	0.19866	0.745	0.502	0.00171318	PGC	ANKRD37	0.19866
7.41663e-08	0.172509	0.675	0.433	0.0017412	PGC	ZNF217	0.172509
7.41888e-08	-0.22672	0.15	0.289	0.00174173	PGC	RALGPS1	-0.22672
7.69574e-08	-0.228433	0.09	0.247	0.00180673	PGC	MYOM2	-0.228433
7.74181e-08	0.16764	0.645	0.384	0.00181754	PGC	WDR82	0.16764
7.74997e-08	0.132431	0.21	0.091	0.00181946	PGC	FGF18	0.132431
7.77631e-08	-0.283596	0.255	0.399	0.00182564	PGC	KDM1B	-0.283596
7.79777e-08	0.146201	0.71	0.421	0.00183068	PGC	SLC29A1	0.146201
7.84e-08	-0.181495	0.1	0.25	0.0018406	PGC	PPIL6	-0.181495
7.86457e-08	0.146133	0.525	0.318	0.00184636	PGC	GMPR2	0.146133
7.87877e-08	-0.475884	0.69	0.696	0.0018497	PGC	SQLE	-0.475884
7.95969e-08	-0.298934	0.025	0.132	0.0018687	PGC	CALB2	-0.298934
8.08187e-08	-0.222497	0.215	0.337	0.00189738	PGC	FANCD2	-0.222497
8.12224e-08	-0.227359	0.19	0.336	0.00190686	PGC	C1orf112	-0.227359
8.19826e-08	-0.12943	0	0.075	0.00192471	PGC	AC017074.1	-0.12943
8.19826e-08	-0.0519165	0	0.075	0.00192471	PGC	TCF7L1	-0.0519165
8.20974e-08	0.170452	0.62	0.406	0.0019274	PGC	DPH6	0.170452
8.22e-08	0.185285	0.81	0.571	0.00192981	PGC	CDK4	0.185285
8.27871e-08	-0.101852	0.02	0.133	0.00194359	PGC	TCF7L2	-0.101852
8.49174e-08	-0.16464	0.08	0.221	0.0019936	PGC	MACROD1	-0.16464
8.52033e-08	-0.320176	0.175	0.316	0.00200032	PGC	INTS6	-0.320176
8.55649e-08	-0.269173	0.245	0.405	0.00200881	PGC	PLEKHA3	-0.269173
8.69999e-08	-0.194918	0.125	0.267	0.0020425	PGC	TFAP2A	-0.194918
9.05138e-08	-0.178152	0.09	0.226	0.00212499	PGC	TBC1D12	-0.178152
9.07221e-08	0.18953	0.71	0.493	0.00212988	PGC	DERL1	0.18953
9.08862e-08	-0.158293	0.07	0.222	0.00213374	PGC	E2F1	-0.158293
9.09405e-08	0.162124	0.36	0.172	0.00213501	PGC	MT1E	0.162124
9.141e-08	0.0951461	0.26	0.103	0.00214603	PGC	MYPOP	0.0951461
9.17575e-08	0.161479	0.29	0.153	0.00215419	PGC	SLC35D2	0.161479
9.19326e-08	-0.467185	0.72	0.712	0.0021583	PGC	COPRS	-0.467185
9.25763e-08	-0.308422	0.135	0.281	0.00217341	PGC	DECR2	-0.308422
9.55249e-08	-0.235139	0.135	0.282	0.00224264	PGC	SLC4A7	-0.235139
9.57402e-08	0.0989162	0.18	0.058	0.00224769	PGC	VWA1	0.0989162
9.59821e-08	-0.316131	0.245	0.387	0.00225337	PGC	IMPDH1	-0.316131
9.64989e-08	-0.348125	0.015	0.098	0.0022655	PGC	PFKP	-0.348125
9.65776e-08	0.172952	0.685	0.461	0.00226735	PGC	TMEM160	0.172952
9.69943e-08	0.0900805	0.205	0.075	0.00227714	PGC	TSPAN18	0.0900805
9.71886e-08	0.15955	0.415	0.23	0.0022817	PGC	CRACR2B	0.15955
9.72758e-08	-0.116397	0	0.074	0.00228374	PGC	LINC02204	-0.116397
9.72758e-08	-0.0819814	0	0.074	0.00228374	PGC	GATA2	-0.0819814
9.79785e-08	-0.434047	0.815	0.796	0.00230024	PGC	PAPOLA	-0.434047
1.01946e-07	0.166837	0.935	0.808	0.00239339	PGC	OST4	0.166837
1.02474e-07	0.172793	0.85	0.638	0.00240578	PGC	SPATS2	0.172793
1.03097e-07	-0.244345	0.265	0.39	0.0024204	PGC	ARFRP1	-0.244345
1.032e-07	-0.29686	0.225	0.342	0.00242282	PGC	PCGF5	-0.29686
1.04294e-07	0.126264	0.275	0.117	0.00244851	PGC	RBBP9	0.126264
1.04766e-07	-0.418481	0.745	0.728	0.00245959	PGC	SMAP1	-0.418481
1.05604e-07	0.0945113	0.245	0.065	0.00247925	PGC	RRAD	0.0945113
1.06215e-07	-0.181943	0.06	0.192	0.00249362	PGC	FHOD3	-0.181943
1.06444e-07	0.174354	0.545	0.372	0.00249897	PGC	SNHG8	0.174354
1.06607e-07	-0.14267	0.075	0.259	0.00250281	PGC	GTSE1	-0.14267
1.06881e-07	-0.494661	0.755	0.742	0.00250925	PGC	HLTF	-0.494661
1.07293e-07	0.125874	0.22	0.074	0.00251892	PGC	AC104041.1	0.125874
1.07476e-07	-0.187681	0.1	0.234	0.00252322	PGC	MTMR12	-0.187681
1.07944e-07	0.113448	0.275	0.101	0.0025342	PGC	IL4R	0.113448
1.08046e-07	0.126196	0.35	0.168	0.00253659	PGC	DHRS4	0.126196
1.08386e-07	-0.434004	0.935	0.898	0.00254458	PGC	HDAC2	-0.434004
1.09309e-07	0.0975767	0.165	0.052	0.00256625	PGC	CHN2	0.0975767
1.11851e-07	-0.306043	0.14	0.255	0.00262593	PGC	CCNI2	-0.306043
1.13203e-07	-0.0626624	0.01	0.105	0.00265768	PGC	ESPL1	-0.0626624
1.141e-07	0.129076	0.41	0.189	0.00267872	PGC	SRGAP1	0.129076
1.15275e-07	-0.195546	0.195	0.361	0.00270631	PGC	ANLN	-0.195546
1.15412e-07	-0.127477	0	0.073	0.00270953	PGC	DCDC2	-0.127477
1.15412e-07	-0.172208	0	0.073	0.00270953	PGC	COX4I2	-0.172208
1.15412e-07	-0.29418	0	0.073	0.00270953	PGC	OOSP2	-0.29418
1.15981e-07	-0.137041	0.07	0.208	0.00272289	PGC	AFF3	-0.137041
1.18883e-07	-0.25193	0.275	0.409	0.00279102	PGC	MIOS	-0.25193
1.19051e-07	0.120316	0.325	0.141	0.00279497	PGC	FILIP1	0.120316
1.19135e-07	-0.291737	0.375	0.479	0.00279693	PGC	FGFR1OP	-0.291737
1.20273e-07	0.130285	0.26	0.12	0.00282366	PGC	ANGPTL4	0.130285
1.21588e-07	0.0730793	0.195	0.052	0.00285453	PGC	VENTX	0.0730793
1.22665e-07	0.0256893	0.06	0.003	0.0028798	PGC	COL5A3	0.0256893
1.23337e-07	0.114691	0.365	0.174	0.00289557	PGC	ANKZF1	0.114691
1.23425e-07	0.226617	0.465	0.24	0.00289764	PGC	FLNB	0.226617
1.24706e-07	-0.278329	0.075	0.179	0.00292773	PGC	CFD	-0.278329
1.26424e-07	-0.270612	0.265	0.412	0.00296804	PGC	ZNF473	-0.270612
1.27415e-07	-0.189976	0.12	0.261	0.00299132	PGC	HOXB5	-0.189976
1.28122e-07	0.130349	0.54	0.282	0.00300793	PGC	TMBIM1	0.130349
1.28462e-07	-0.247227	0.155	0.31	0.00301589	PGC	CDC6	-0.247227
1.3028e-07	-0.10767	0.02	0.124	0.00305858	PGC	CHD5	-0.10767
1.31232e-07	0.152396	0.79	0.557	0.00308094	PGC	PLD3	0.152396
1.35248e-07	-0.116708	0.035	0.151	0.00317522	PGC	NFATC1	-0.116708
1.35962e-07	0.0981638	0.26	0.068	0.00319199	PGC	LINC01160	0.0981638
1.36919e-07	-0.0850633	0	0.072	0.00321445	PGC	RASSF8	-0.0850633
1.37281e-07	-0.376084	0.51	0.556	0.00322294	PGC	SLC25A1	-0.376084
1.41199e-07	0.0783009	0.19	0.048	0.00331493	PGC	MFSD2A	0.0783009
1.42883e-07	-0.128815	0.02	0.136	0.00335446	PGC	HIST1H3G	-0.128815
1.44095e-07	-0.173429	0.075	0.22	0.00338291	PGC	MINK1	-0.173429
1.45537e-07	-0.147683	0.03	0.17	0.00341677	PGC	SNX30	-0.147683
1.47922e-07	-0.282328	0.25	0.379	0.00347277	PGC	POLR3H	-0.282328
1.5037e-07	-0.234085	0.13	0.285	0.00353024	PGC	MSL1	-0.234085
1.52841e-07	0.147324	0.495	0.232	0.00358826	PGC	ARMT1	0.147324
1.531e-07	-0.184616	0.015	0.108	0.00359434	PGC	PKIA-AS1	-0.184616
1.54783e-07	0.0981842	0.265	0.084	0.00363383	PGC	PROS1	0.0981842
1.54893e-07	0.0949377	0.245	0.098	0.00363643	PGC	METTL27	0.0949377
1.58119e-07	0.139994	0.555	0.339	0.00371216	PGC	APH1A	0.139994
1.58482e-07	-0.118252	0.01	0.099	0.00372069	PGC	NPY	-0.118252
1.59164e-07	0.124411	0.42	0.238	0.00373668	PGC	CYB561D2	0.124411
1.6123e-07	-0.189205	0.15	0.297	0.00378521	PGC	MAP3K11	-0.189205
1.61369e-07	-0.182149	0.015	0.1	0.00378846	PGC	MYO5B	-0.182149
1.61469e-07	0.167986	0.67	0.426	0.00379081	PGC	GOLPH3	0.167986
1.62242e-07	0.154235	0.54	0.306	0.00380897	PGC	PHC1	0.154235
1.62421e-07	-0.123147	0	0.072	0.00381315	PGC	ASGR2	-0.123147
1.62567e-07	0.242146	0.615	0.408	0.00381658	PGC	MCL1	0.242146
1.62828e-07	0.132268	1	0.952	0.00382272	PGC	HSP90AB1	0.132268
1.62915e-07	-0.166447	0.075	0.244	0.00382476	PGC	MKI67	-0.166447
1.66411e-07	0.153591	0.895	0.698	0.00390684	PGC	PA2G4	0.153591
1.66645e-07	0.137997	0.335	0.152	0.00391232	PGC	PHLDA1	0.137997
1.68489e-07	0.179967	0.905	0.708	0.00395563	PGC	HSPA9	0.179967
1.69731e-07	-0.302511	0.26	0.386	0.00398477	PGC	PTPMT1	-0.302511
1.69867e-07	0.110861	0.69	0.328	0.00398796	PGC	LOXL2	0.110861
1.74696e-07	-0.405253	0.695	0.702	0.00410133	PGC	MCM7	-0.405253
1.76718e-07	0.17268	0.93	0.744	0.0041488	PGC	SRSF10	0.17268
1.77115e-07	-0.404807	0.55	0.605	0.00415812	PGC	POLE4	-0.404807
1.7825e-07	0.134672	0.44	0.257	0.00418477	PGC	MAN2B1	0.134672
1.78669e-07	-0.309648	0.485	0.562	0.00419461	PGC	CEP63	-0.309648
1.79545e-07	-0.200766	0.085	0.202	0.00421518	PGC	GADD45A	-0.200766
1.79656e-07	-0.262811	0.245	0.356	0.00421779	PGC	TMEM42	-0.262811
1.80071e-07	-0.34685	0.395	0.517	0.00422752	PGC	CLOCK	-0.34685
1.82319e-07	-0.0918863	0.045	0.17	0.00428031	PGC	PTPN18	-0.0918863
1.82489e-07	0.127646	0.435	0.189	0.00428429	PGC	SPRY1	0.127646
1.83464e-07	0.0682688	0.12	0.03	0.00430718	PGC	EVX1-AS	0.0682688
1.87051e-07	-0.210834	0.09	0.248	0.00439139	PGC	MCMDC2	-0.210834
1.87908e-07	-0.375985	0.545	0.59	0.00441151	PGC	WIPI2	-0.375985
1.89228e-07	0.125468	0.535	0.302	0.0044425	PGC	RPP25L	0.125468
1.89464e-07	0.175514	0.87	0.664	0.00444805	PGC	APLP2	0.175514
1.90624e-07	-0.328579	0.515	0.583	0.00447528	PGC	UBA1	-0.328579
1.92229e-07	0.0887608	0.19	0.072	0.00451297	PGC	SLC7A4	0.0887608
1.92657e-07	-0.107972	0	0.071	0.00452302	PGC	MAGEC1	-0.107972
1.94375e-07	-0.0744975	0.01	0.099	0.00456334	PGC	TRIM17	-0.0744975
1.95693e-07	-0.298554	0.21	0.337	0.00459428	PGC	UBA6	-0.298554
1.95734e-07	0.140905	0.48	0.277	0.00459525	PGC	COA7	0.140905
1.96756e-07	0.160111	0.64	0.4	0.00461923	PGC	PAGR1	0.160111
1.98003e-07	-0.229145	0.125	0.291	0.00464852	PGC	DIAPH3	-0.229145
2.02055e-07	-0.161165	0.08	0.188	0.00474365	PGC	FBXO4	-0.161165
2.0213e-07	0.0990668	0.675	0.298	0.00474541	PGC	SHD	0.0990668
2.02233e-07	0.152685	0.545	0.323	0.00474782	PGC	TPD52	0.152685
2.10706e-07	-0.409862	0.485	0.548	0.00494675	PGC	POLR2A	-0.409862
2.11622e-07	-0.247095	0.265	0.415	0.00496825	PGC	GMDS	-0.247095
2.12332e-07	-0.299567	0.01	0.098	0.00498493	PGC	CFAP58	-0.299567
2.13696e-07	0.132862	0.48	0.239	0.00501694	PGC	NBDY	0.132862
2.15313e-07	-0.173675	0.03	0.144	0.00505491	PGC	SPATA6L	-0.173675
2.15346e-07	-0.0873818	0.005	0.085	0.00505568	PGC	FOXD3-AS1	-0.0873818
2.16355e-07	0.0546533	0.13	0.031	0.00507935	PGC	AC090907.2	0.0546533
2.17045e-07	-0.235344	0.145	0.283	0.00509556	PGC	HDGFL1	-0.235344
2.22638e-07	-0.400941	0.455	0.546	0.00522687	PGC	ME2	-0.400941
2.23162e-07	0.178255	0.495	0.282	0.00523917	PGC	PIAS3	0.178255
2.23264e-07	-0.357374	0.645	0.672	0.00524156	PGC	NELFE	-0.357374
2.24114e-07	-0.37759	0.5	0.567	0.00526153	PGC	STRADB	-0.37759
2.27136e-07	-0.163937	0.005	0.081	0.00533248	PGC	LINC02158	-0.163937
2.28506e-07	-0.239013	0	0.07	0.00536464	PGC	ARHGAP15	-0.239013
2.29282e-07	-0.220975	0.015	0.114	0.00538285	PGC	ART3	-0.220975
2.31267e-07	0.125952	0.4	0.223	0.00542946	PGC	SOCS2	0.125952
2.31663e-07	0.175144	0.745	0.536	0.00543874	PGC	AK4	0.175144
2.35048e-07	-0.260516	0.255	0.368	0.00551822	PGC	TUBGCP3	-0.260516
2.35391e-07	0.183185	0.805	0.592	0.00552628	PGC	SNF8	0.183185
2.35589e-07	0.196725	0.81	0.592	0.00553092	PGC	NPM3	0.196725
2.36464e-07	-0.443785	0.695	0.677	0.00555145	PGC	UBE2T	-0.443785
2.42361e-07	0.0907926	0.23	0.099	0.00568992	PGC	SPATA17	0.0907926
2.43202e-07	-0.458461	0.785	0.772	0.00570964	PGC	UBE2E2	-0.458461
2.43478e-07	-0.342972	0.56	0.618	0.00571613	PGC	PPP1R12A	-0.342972
2.437e-07	-0.221742	0.08	0.198	0.00572135	PGC	IQUB	-0.221742
2.44006e-07	0.169126	0.71	0.48	0.00572854	PGC	DEGS1	0.169126
2.44732e-07	-0.108009	0.01	0.095	0.00574558	PGC	LINC01632	-0.108009
2.44907e-07	-0.392392	0.56	0.593	0.00574969	PGC	CAPZA2	-0.392392
2.4567e-07	0.157924	0.835	0.637	0.0057676	PGC	ZNF770	0.157924
2.46599e-07	0.0860334	0.195	0.069	0.00578941	PGC	AARD	0.0860334
2.48256e-07	-0.21658	0.005	0.095	0.0058283	PGC	BEND2	-0.21658
2.48507e-07	-0.143927	0.035	0.148	0.0058342	PGC	ZNF445	-0.143927
2.48656e-07	-0.129232	0.015	0.106	0.0058377	PGC	RNF182	-0.129232
2.54551e-07	-0.385747	0.6	0.628	0.0059761	PGC	PTTG1	-0.385747
2.56654e-07	-0.23671	0.215	0.362	0.00602548	PGC	ULK2	-0.23671
2.56956e-07	0.0850193	0.26	0.095	0.00603255	PGC	AC078883.1	0.0850193
2.58502e-07	-0.104638	0.005	0.084	0.00606885	PGC	PPP1R36	-0.104638
2.67298e-07	0.0627729	0.155	0.041	0.00627536	PGC	ADORA2B	0.0627729
2.69156e-07	-0.178496	0.085	0.235	0.00631898	PGC	CBR1	-0.178496
2.7013e-07	-0.283519	0.365	0.485	0.00634185	PGC	CTNNBIP1	-0.283519
2.71005e-07	-0.171829	0	0.069	0.00636238	PGC	AC084816.1	-0.171829
2.74118e-07	0.169894	0.68	0.448	0.00643547	PGC	PITPNA-AS1	0.169894
2.74329e-07	-0.249194	0.355	0.467	0.00644042	PGC	CENPT	-0.249194
2.75222e-07	0.195184	0.8	0.607	0.00646138	PGC	SUCLA2	0.195184
2.75427e-07	0.0782833	0.205	0.054	0.0064662	PGC	ST6GAL1	0.0782833
2.75707e-07	-0.128549	0.015	0.101	0.00647277	PGC	MALRD1	-0.128549
2.7659e-07	-0.0785383	0.005	0.112	0.00649351	PGC	MAFTRR	-0.0785383
2.78557e-07	0.147514	0.71	0.49	0.00653969	PGC	NOB1	0.147514
2.81989e-07	-0.325944	0.39	0.454	0.00662025	PGC	ITSN1	-0.325944
2.83269e-07	0.144157	0.86	0.646	0.0066503	PGC	SSR2	0.144157
2.83834e-07	-0.311542	0.425	0.524	0.00666357	PGC	FGFR1OP2	-0.311542
2.86089e-07	0.159433	0.515	0.292	0.00671652	PGC	PKP2	0.159433
2.88068e-07	-0.322084	0.37	0.481	0.00676297	PGC	ARID4A	-0.322084
2.89786e-07	-0.103779	0.01	0.1	0.00680332	PGC	PHYHIPL	-0.103779
2.9123e-07	0.121275	0.415	0.138	0.00683722	PGC	GYPC	0.121275
2.91547e-07	0.110331	0.275	0.107	0.00684465	PGC	PTN	0.110331
2.92433e-07	-0.30074	0.335	0.461	0.00686545	PGC	PPP6R3	-0.30074
2.94777e-07	0.140171	0.385	0.189	0.00692049	PGC	MGAT5	0.140171
2.94924e-07	0.148178	0.635	0.416	0.00692392	PGC	ABT1	0.148178
2.97089e-07	-0.376612	0.625	0.651	0.00697476	PGC	SHOC2	-0.376612
2.9774e-07	-0.274493	0.28	0.4	0.00699004	PGC	NAA35	-0.274493
2.98008e-07	0.14037	0.29	0.126	0.00699632	PGC	MYO1C	0.14037
3.06513e-07	-0.353265	0.49	0.539	0.00719602	PGC	RAD17	-0.353265
3.10042e-07	0.144913	0.55	0.335	0.00727885	PGC	L3MBTL2	0.144913
3.1536e-07	0.1517	0.94	0.756	0.0074037	PGC	LSM2	0.1517
3.17495e-07	-0.0891877	0.005	0.082	0.00745383	PGC	LINC01606	-0.0891877
3.19361e-07	-0.13046	0.045	0.172	0.00749765	PGC	TRIM4	-0.13046
3.20011e-07	-0.193773	0.185	0.338	0.0075129	PGC	RANBP9	-0.193773
3.20503e-07	-0.159947	0.105	0.23	0.00752444	PGC	INCENP	-0.159947
3.21385e-07	-0.190862	0	0.068	0.00754515	PGC	TP63	-0.190862
3.26285e-07	-0.157171	0.11	0.237	0.0076602	PGC	CFAP53	-0.157171
3.29083e-07	-0.256634	0.3	0.435	0.00772588	PGC	EZH2	-0.256634
3.34078e-07	-0.386274	0.76	0.728	0.00784316	PGC	ATOX1	-0.386274
3.3443e-07	-0.101791	0.03	0.126	0.00785141	PGC	HSPA1L	-0.101791
3.35232e-07	-0.323163	0.415	0.513	0.00787025	PGC	FANCL	-0.323163
3.36325e-07	-0.0937037	0.015	0.103	0.00789591	PGC	HOXB13	-0.0937037
3.37598e-07	-0.475913	0.72	0.718	0.00792579	PGC	CLNS1A	-0.475913
3.37983e-07	0.155995	0.925	0.772	0.00793483	PGC	SERP1	0.155995
3.39138e-07	-0.463762	0.865	0.8	0.00796195	PGC	HMGB3	-0.463762
3.40395e-07	-0.277017	0.23	0.362	0.00799144	PGC	MNS1	-0.277017
3.44061e-07	-0.380266	0.725	0.726	0.00807753	PGC	ELAVL2	-0.380266
3.45128e-07	-0.161213	0.035	0.141	0.00810258	PGC	PTPN20	-0.161213
3.4582e-07	0.142861	0.53	0.31	0.00811882	PGC	SNX24	0.142861
3.47102e-07	0.140321	0.37	0.177	0.00814891	PGC	AHCYL2	0.140321
3.49316e-07	-0.296461	0.225	0.362	0.00820089	PGC	DAAM1	-0.296461
3.51306e-07	-0.283497	0.225	0.369	0.0082476	PGC	GLE1	-0.283497
3.52895e-07	-0.132075	0.05	0.169	0.00828491	PGC	TXNDC16	-0.132075
3.56387e-07	0.0775955	0.165	0.053	0.0083669	PGC	MX1	0.0775955
3.56814e-07	0.143306	0.42	0.186	0.00837693	PGC	FSCN1	0.143306
3.57693e-07	-0.277256	0.29	0.419	0.00839755	PGC	KRCC1	-0.277256
3.63326e-07	0.117573	0.315	0.146	0.00852982	PGC	DEPTOR	0.117573
3.6393e-07	-0.167727	0.155	0.299	0.008544	PGC	PKNOX1	-0.167727
3.64176e-07	0.0898039	0.21	0.068	0.00854975	PGC	KLF8	0.0898039
3.7216e-07	-0.442724	0.655	0.649	0.0087372	PGC	VBP1	-0.442724
3.75418e-07	-0.266681	0.145	0.261	0.00881369	PGC	SPART	-0.266681
3.79009e-07	0.132995	0.475	0.282	0.00889799	PGC	TRAPPC5	0.132995
3.81103e-07	-0.124714	0	0.068	0.00894715	PGC	HORMAD2	-0.124714
3.81103e-07	-0.067817	0	0.068	0.00894715	PGC	ZNF541	-0.067817
3.81103e-07	-0.0744489	0	0.068	0.00894716	PGC	PLCL2	-0.0744489
3.83861e-07	-0.101054	0.03	0.145	0.00901191	PGC	FAM241A	-0.101054
3.8397e-07	-0.54942	0.45	0.542	0.00901447	PGC	ID1	-0.54942
3.8624e-07	0.153186	0.55	0.318	0.00906776	PGC	STAT3	0.153186
3.86553e-07	0.108516	0.265	0.126	0.00907511	PGC	ARHGEF2	0.108516
3.9339e-07	0.157176	0.745	0.512	0.00923562	PGC	UROD	0.157176
3.94372e-07	-0.247483	0.295	0.431	0.00925866	PGC	BLVRA	-0.247483
3.95962e-07	0.14489	0.73	0.499	0.009296	PGC	WDR74	0.14489
3.97213e-07	-0.0615255	0.005	0.083	0.00932536	PGC	SERINC4	-0.0615255
4.06354e-07	-0.367222	0.76	0.726	0.00953997	PGC	TSPAN3	-0.367222
4.09144e-07	-0.239433	0.275	0.388	0.00960548	PGC	ECT2	-0.239433
4.10506e-07	-0.444521	0.695	0.708	0.00963746	PGC	GRSF1	-0.444521
4.15589e-07	0.189802	0.775	0.555	0.00975679	PGC	TRMT10C	0.189802
4.16165e-07	0.163747	0.615	0.385	0.00977031	PGC	PNRC2	0.163747
4.25667e-07	-0.146208	0.075	0.204	0.00999337	PGC	NCAPD2	-0.146208
4.28669e-07	0.173891	0.565	0.353	0.0100639	PGC	ECI1	0.173891
4.29741e-07	-0.228622	0.225	0.392	0.010089	PGC	RANBP17	-0.228622
4.42898e-07	0.0834418	0.22	0.078	0.0103979	PGC	ATG2A	0.0834418
4.4567e-07	0.130221	0.235	0.101	0.010463	PGC	PROM1	0.130221
4.48948e-07	-0.173443	0.03	0.122	0.01054	PGC	FBXO43	-0.173443
4.49158e-07	-0.397398	0.595	0.637	0.0105449	PGC	BSCL2	-0.397398
4.50955e-07	0.157785	0.485	0.312	0.0105871	PGC	TYW1	0.157785
4.51033e-07	0.149737	0.34	0.163	0.0105889	PGC	LPP	0.149737
4.51886e-07	-0.0988315	0	0.067	0.0106089	PGC	GABBR2	-0.0988315
4.51886e-07	-0.0986743	0	0.067	0.0106089	PGC	NGB	-0.0986743
4.51886e-07	-0.101993	0	0.067	0.0106089	PGC	F2	-0.101993
4.51886e-07	-0.0818291	0	0.067	0.0106089	PGC	FAM171B	-0.0818291
4.51887e-07	-0.0887134	0	0.067	0.0106089	PGC	SLCO6A1	-0.0887134
4.55206e-07	0.127991	0.6	0.374	0.0106869	PGC	NOA1	0.127991
4.66855e-07	-0.147449	0.115	0.242	0.0109604	PGC	NBPF10	-0.147449
4.68943e-07	-0.368716	0.665	0.708	0.0110094	PGC	PDIA4	-0.368716
4.72635e-07	0.161148	0.955	0.838	0.0110961	PGC	SET	0.161148
4.7378e-07	-0.364475	0.41	0.484	0.0111229	PGC	RRAGB	-0.364475
4.78131e-07	-0.449045	0.885	0.806	0.0112251	PGC	VAPA	-0.449045
4.78671e-07	-0.200773	0.155	0.298	0.0112378	PGC	ADNP2	-0.200773
4.80429e-07	-0.37222	0.195	0.282	0.011279	PGC	TESMIN	-0.37222
4.82291e-07	-0.144449	0.025	0.121	0.0113228	PGC	TAZ	-0.144449
4.89535e-07	-0.300885	0.155	0.298	0.0114928	PGC	ZNF711	-0.300885
4.91346e-07	-0.370234	0.57	0.602	0.0115353	PGC	DGCR6L	-0.370234
4.9383e-07	-0.142742	0.01	0.103	0.0115937	PGC	TRIM50	-0.142742
4.98614e-07	-0.348906	0.465	0.518	0.011706	PGC	PRKAR2A	-0.348906
4.98925e-07	-0.367405	0.395	0.479	0.0117133	PGC	CCDC93	-0.367405
4.98928e-07	-0.278203	0.46	0.534	0.0117133	PGC	SCAPER	-0.278203
5.01013e-07	-0.251191	0.215	0.334	0.0117623	PGC	ATF7IP2	-0.251191
5.02874e-07	-0.106241	0.02	0.109	0.011806	PGC	DMTN	-0.106241
5.03566e-07	0.141745	0.77	0.479	0.0118222	PGC	LMO4	0.141745
5.03758e-07	-0.361803	0.75	0.746	0.0118267	PGC	CSE1L	-0.361803
5.04634e-07	-0.209312	0.22	0.374	0.0118473	PGC	TFDP1	-0.209312
5.12154e-07	0.158185	0.62	0.365	0.0120238	PGC	SERTAD3	0.158185
5.14456e-07	-0.22253	0.04	0.148	0.0120779	PGC	HOXD1	-0.22253
5.16008e-07	0.0367351	0.075	0.014	0.0121143	PGC	BFSP2-AS1	0.0367351
5.17659e-07	-0.122119	0.02	0.122	0.0121531	PGC	AMN	-0.122119
5.18643e-07	-0.0997726	0.01	0.102	0.0121762	PGC	SIRPA	-0.0997726
5.2108e-07	-0.435835	0.255	0.332	0.0122334	PGC	UBA5	-0.435835
5.2139e-07	-0.313163	0.525	0.602	0.0122407	PGC	C16orf87	-0.313163
5.26527e-07	0.203573	0.49	0.297	0.0123613	PGC	RBM38	0.203573
5.33457e-07	-0.155149	0.08	0.208	0.012524	PGC	LINC01019	-0.155149
5.34037e-07	-0.19276	0.155	0.301	0.0125376	PGC	UGGT2	-0.19276
5.35781e-07	-0.0847821	0	0.066	0.0125785	PGC	NUP210L	-0.0847821
5.35781e-07	-0.058086	0	0.066	0.0125785	PGC	FAM111B	-0.058086
5.3875e-07	0.154097	0.88	0.672	0.0126482	PGC	TSPAN6	0.154097
5.38931e-07	0.195204	0.8	0.597	0.0126525	PGC	ATP5MC1	0.195204
5.45309e-07	-0.267425	0.135	0.248	0.0128022	PGC	HSPA2	-0.267425
5.52511e-07	0.103336	0.86	0.637	0.0129713	PGC	SDHC	0.103336
5.71059e-07	0.16828	0.555	0.348	0.0134068	PGC	IMPA2	0.16828
5.72107e-07	-0.159557	0.07	0.192	0.0134313	PGC	CFAP70	-0.159557
5.77319e-07	-0.178098	0.12	0.242	0.0135537	PGC	ZNF580	-0.178098
5.80987e-07	0.135811	0.875	0.677	0.0136398	PGC	CSNK1A1	0.135811
5.81616e-07	-0.146021	0.07	0.188	0.0136546	PGC	CYLD	-0.146021
5.81861e-07	-0.3958	0.615	0.627	0.0136604	PGC	ZCCHC17	-0.3958
5.83195e-07	-0.160814	0.05	0.165	0.0136917	PGC	TRIM5	-0.160814
5.85433e-07	-0.282154	0.305	0.418	0.0137442	PGC	TMEM80	-0.282154
6.04893e-07	-0.110838	0.055	0.189	0.0142011	PGC	DPYD	-0.110838
6.13344e-07	-0.207362	0.005	0.074	0.0143995	PGC	PRDM9	-0.207362
6.13413e-07	-0.196568	0.15	0.292	0.0144011	PGC	OSCP1	-0.196568
6.14138e-07	-0.288601	0.485	0.542	0.0144181	PGC	SMYD2	-0.288601
6.14435e-07	-0.224998	0.045	0.156	0.0144251	PGC	C19orf38	-0.224998
6.16324e-07	-0.201241	0.155	0.286	0.0144694	PGC	SEMA4F	-0.201241
6.19505e-07	-0.43154	0.9	0.843	0.0145441	PGC	HSPA4	-0.43154
6.22479e-07	-0.0788898	0.035	0.191	0.0146139	PGC	KIF4A	-0.0788898
6.31628e-07	0.155462	0.865	0.659	0.0148287	PGC	GARS	0.155462
6.33257e-07	-0.100087	0.015	0.1	0.014867	PGC	KIAA2012	-0.100087
6.46628e-07	-0.501398	0.1	0.196	0.0151809	PGC	RARRES2	-0.501398
6.58974e-07	0.0725959	0.96	0.851	0.0154707	PGC	HSPA5	0.0725959
6.58998e-07	-0.167655	0.115	0.28	0.0154713	PGC	SHCBP1	-0.167655
6.62699e-07	-0.155801	0.145	0.298	0.0155582	PGC	TMTC4	-0.155801
6.66789e-07	0.0758613	0.22	0.066	0.0156542	PGC	MME	0.0758613
6.66984e-07	0.157401	0.72	0.527	0.0156588	PGC	TOMM70	0.157401
6.70038e-07	-0.347169	0.58	0.618	0.0157305	PGC	SEPT10	-0.347169
6.70173e-07	0.141406	0.37	0.218	0.0157336	PGC	DPYSL2	0.141406
6.70558e-07	-0.109029	0.035	0.128	0.0157427	PGC	LIMCH1	-0.109029
6.91563e-07	-0.191278	0.29	0.452	0.0162358	PGC	CENPE	-0.191278
6.96444e-07	-0.201451	0.1	0.207	0.0163504	PGC	STK17B	-0.201451
7.15267e-07	-0.152896	0.015	0.102	0.0167923	PGC	FN1	-0.152896
7.17177e-07	0.0594468	0.13	0.032	0.0168372	PGC	TNFRSF1A	0.0594468
7.20118e-07	-0.0849739	0.005	0.086	0.0169062	PGC	EFEMP2	-0.0849739
7.24626e-07	0.136277	0.395	0.192	0.017012	PGC	TMEM223	0.136277
7.29278e-07	-0.218691	0.39	0.505	0.0171213	PGC	AKTIP	-0.218691
7.50405e-07	-0.134498	0.125	0.261	0.0176172	PGC	PPM1J	-0.134498
7.53042e-07	-0.0755085	0	0.064	0.0176792	PGC	TIGD3	-0.0755085
7.53042e-07	-0.0820447	0	0.064	0.0176792	PGC	SCEL	-0.0820447
7.53042e-07	-0.0994838	0	0.064	0.0176792	PGC	MATN3	-0.0994838
7.53821e-07	-0.210914	0.11	0.239	0.0176974	PGC	AC010226.1	-0.210914
7.5566e-07	-0.365503	0.72	0.709	0.0177406	PGC	KMT2E	-0.365503
7.5638e-07	0.125198	0.58	0.338	0.0177575	PGC	MRPS27	0.125198
7.58212e-07	0.175575	0.495	0.335	0.0178005	PGC	LRRC23	0.175575
7.59056e-07	-0.199665	0.08	0.198	0.0178204	PGC	EFCAB13	-0.199665
7.84113e-07	-0.230026	0.225	0.368	0.0184086	PGC	CTHRC1	-0.230026
7.87169e-07	0.148889	0.48	0.268	0.0184804	PGC	SLC39A1	0.148889
7.88287e-07	-0.381129	0.695	0.679	0.0185066	PGC	UBE3A	-0.381129
8.06649e-07	-0.176073	0.11	0.245	0.0189377	PGC	DPP8	-0.176073
8.1996e-07	-0.124297	0.035	0.138	0.0192502	PGC	GABRB2	-0.124297
8.24009e-07	-0.406338	0.575	0.588	0.0193453	PGC	ARID4B	-0.406338
8.37993e-07	-0.29102	0.37	0.488	0.0196736	PGC	TLE4	-0.29102
8.3963e-07	-0.327067	0.665	0.663	0.019712	PGC	CEBPZ	-0.327067
8.43537e-07	-0.189702	0.185	0.31	0.0198037	PGC	WWOX	-0.189702
8.6327e-07	-0.0796796	0.025	0.125	0.020267	PGC	RADIL	-0.0796796
8.64707e-07	0.164871	0.57	0.37	0.0203007	PGC	CTBP2	0.164871
8.79287e-07	-0.202959	0.205	0.336	0.020643	PGC	APLP1	-0.202959
8.79544e-07	0.140762	0.83	0.627	0.0206491	PGC	ATG5	0.140762
8.82044e-07	-0.253202	0.235	0.354	0.0207077	PGC	BUB1B	-0.253202
8.82088e-07	0.173756	0.415	0.251	0.0207088	PGC	SLC16A3	0.173756
8.83193e-07	-0.130996	0.03	0.143	0.0207347	PGC	EFCAB2	-0.130996
8.88502e-07	-0.335504	0.28	0.382	0.0208594	PGC	PCGF3	-0.335504
8.9228e-07	-0.179335	0.075	0.162	0.0209481	PGC	AGMO	-0.179335
8.92677e-07	-0.0418261	0	0.063	0.0209574	PGC	FOXE3	-0.0418261
8.92677e-07	-0.0633845	0	0.063	0.0209574	PGC	GATA3	-0.0633845
8.92677e-07	-0.0751725	0	0.063	0.0209574	PGC	PROSER2-AS1	-0.0751725
8.92678e-07	-0.222785	0	0.063	0.0209574	PGC	CSF1R	-0.222785
8.93655e-07	-0.216192	0.15	0.286	0.0209803	PGC	CCDC91	-0.216192
8.95886e-07	-0.313986	0.595	0.638	0.0210327	PGC	LRRC42	-0.313986
9.04074e-07	-0.164291	0.035	0.136	0.0212249	PGC	ZBTB33	-0.164291
9.05613e-07	-0.329824	0.385	0.482	0.0212611	PGC	CDK16	-0.329824
9.0582e-07	-0.546981	0.055	0.132	0.0212659	PGC	TUBB8P12	-0.546981
9.18253e-07	-0.427137	0.81	0.778	0.0215578	PGC	GPBP1	-0.427137
9.2235e-07	0.0908599	0.3	0.096	0.021654	PGC	ACE	0.0908599
9.27893e-07	0.0674264	0.18	0.051	0.0217842	PGC	DOCK6	0.0674264
9.28961e-07	0.150349	0.575	0.362	0.0218092	PGC	SMIM12	0.150349
9.31679e-07	-0.183271	0.165	0.295	0.021873	PGC	MKNK2	-0.183271
9.354e-07	0.0734716	0.07	0.012	0.0219604	PGC	FP236383.1	0.0734716
9.35909e-07	0.217797	0.63	0.439	0.0219723	PGC	FEZ2	0.217797
9.39985e-07	0.084861	0.09	0.025	0.022068	PGC	AC108134.3	0.084861
9.40504e-07	-0.110251	0.01	0.095	0.0220802	PGC	CCDC192	-0.110251
9.47047e-07	-0.299363	0.435	0.512	0.0222338	PGC	SNRNP27	-0.299363
9.58409e-07	-0.0476541	0.005	0.079	0.0225006	PGC	NUTM1	-0.0476541
9.59565e-07	-0.420228	0.71	0.69	0.0225277	PGC	GLRX3	-0.420228
9.67349e-07	-0.131963	0.115	0.238	0.0227105	PGC	AC036176.1	-0.131963
9.68085e-07	0.129927	0.33	0.178	0.0227277	PGC	PBXIP1	0.129927
9.69445e-07	-0.132074	0.075	0.208	0.0227597	PGC	ZNF519	-0.132074
9.7323e-07	-0.157424	0.075	0.192	0.0228485	PGC	CSMD3	-0.157424
9.74817e-07	0.113917	0.375	0.191	0.0228858	PGC	EDEM2	0.113917
9.82443e-07	-0.269536	0.34	0.432	0.0230648	PGC	POLD1	-0.269536
9.86589e-07	0.0825329	0.22	0.093	0.0231621	PGC	NRM	0.0825329
9.89278e-07	0.128233	0.54	0.325	0.0232253	PGC	FBXO28	0.128233
9.95468e-07	-0.463705	0.345	0.407	0.0233706	PGC	BRDT	-0.463705
1.00085e-06	-0.406313	0.765	0.763	0.0234969	PGC	AKR1B1	-0.406313
1.01164e-06	0.0865602	0.11	0.03	0.0237502	PGC	CFP	0.0865602
1.01418e-06	0.138085	0.35	0.156	0.02381	PGC	GPSM3	0.138085
1.01699e-06	-0.0920688	0.025	0.121	0.023876	PGC	MYOM1	-0.0920688
1.01781e-06	-0.12447	0.05	0.158	0.0238951	PGC	CCDC189	-0.12447
1.02534e-06	-0.131335	0.075	0.224	0.024072	PGC	ARHGAP11A	-0.131335
1.02639e-06	0.0456451	0.11	0.021	0.0240966	PGC	TRPC5	0.0456451
1.03051e-06	0.13734	0.565	0.331	0.0241933	PGC	ADIPOR1	0.13734
1.03358e-06	-0.399273	0.91	0.838	0.0242655	PGC	TCEA1	-0.399273
1.03395e-06	0.0780484	0.205	0.064	0.0242741	PGC	NTNG1	0.0780484
1.03764e-06	-0.0970665	0.005	0.072	0.0243606	PGC	TFDP3	-0.0970665
1.03894e-06	-0.339359	0.35	0.438	0.0243912	PGC	SPAG16	-0.339359
1.05164e-06	-0.112703	0.025	0.12	0.0246895	PGC	KIF24	-0.112703
1.05758e-06	0.12918	0.745	0.488	0.0248287	PGC	TDP2	0.12918
1.05814e-06	-0.129718	0	0.062	0.024842	PGC	AC010127.1	-0.129718
1.08464e-06	-0.0751233	0.06	0.232	0.0254642	PGC	HMMR	-0.0751233
1.08533e-06	-0.0920409	0.04	0.139	0.0254804	PGC	EPB41L1	-0.0920409
1.10233e-06	-0.336481	0.68	0.687	0.0258793	PGC	SNAP29	-0.336481
1.10499e-06	-0.139736	0.035	0.127	0.0259418	PGC	CASC1	-0.139736
1.10836e-06	-0.341997	0.615	0.643	0.026021	PGC	C6orf136	-0.341997
1.11363e-06	-0.330106	0.625	0.652	0.0261446	PGC	HIBADH	-0.330106
1.11899e-06	-0.137222	0.055	0.174	0.0262706	PGC	TRAF3	-0.137222
1.1283e-06	0.128218	0.385	0.207	0.0264892	PGC	TAF13	0.128218
1.12871e-06	-0.362503	0.735	0.716	0.0264987	PGC	THOC3	-0.362503
1.1347e-06	-0.359458	0.66	0.676	0.0266394	PGC	BAG6	-0.359458
1.13484e-06	0.147464	0.455	0.278	0.0266425	PGC	APBB2	0.147464
1.15004e-06	-0.0927267	0.005	0.091	0.0269995	PGC	ZNF620	-0.0927267
1.17251e-06	0.0461581	0.095	0.014	0.027527	PGC	AC106864.1	0.0461581
[truncated: 87,660 more rows]

## Sheet: 2_TFact_fromscRNA_germcells
p_val	avg_log2FC	pct.1	pct.2	p_val_adj	cluster	TF
7.34445e-154	2.08563	0.97	0.358	1.01721e-150	oocyte	FIGLA-B
6.59962e-135	1.64031	1	0.394	9.14047e-132	oogonia_meiosis	HSF5-E
1.22087e-119	-1.8211	0.015	0.632	1.6909e-116	oogonia_meiosis	ZFPM1-E
2.86502e-119	-1.83294	0	0.588	3.96805e-116	oogonia_meiosis	NFKBIE-E
6.57819e-117	1.2481	0.985	0.395	9.11079e-114	oogonia_meiosis	HES4-E
2.61505e-116	-1.77521	0.015	0.564	3.62185e-113	oogonia_meiosis	ZBTB47-E
5.40687e-111	-1.75727	0.015	0.571	7.48852e-108	oogonia_meiosis	PRRX2-E
6.67203e-110	1.21008	0.965	0.42	9.24075e-107	oogonia_meiosis	ZHX1-D
3.0951e-106	-1.67301	0.04	0.614	4.28671e-103	oogonia_meiosis	ZNF575-E
9.7732e-102	-1.73469	0.005	0.548	1.35359e-98	oogonia_meiosis	ZNF296-E
2.43994e-101	-1.6423	0.045	0.585	3.37931e-98	oogonia_meiosis	ZNF219-E
2.01113e-100	1.25387	0.935	0.374	2.78542e-97	oogonia_meiosis	ZIC5-E
7.41584e-100	-1.68649	0.015	0.621	1.02709e-96	oogonia_meiosis	SSRP1-C
3.82543e-99	-1.61445	0.04	0.662	5.29821e-96	oogonia_meiosis	ZNF358-E
5.12823e-98	-1.67274	0.03	0.663	7.1026e-95	oogonia_meiosis	ZNF581-E
2.7541e-97	1.53781	0.96	0.336	3.81443e-94	PGC_mitotic	FOXM1-B
5.9435e-97	-1.58062	0.035	0.656	8.23175e-94	oogonia_meiosis	ZNF787-E
1.22343e-95	-1.54797	0.045	0.644	1.69444e-92	oogonia_meiosis	ZNF524-E
1.87222e-95	-1.59952	0.035	0.556	2.59303e-92	oogonia_meiosis	NFIX-E
1.77719e-94	1.23241	0.93	0.364	2.4614e-91	oogonia_meiosis	DMRTB1-E
4.83658e-94	1.16389	0.985	0.43	6.69866e-91	PGC_mitotic	MYC-AA
9.52494e-94	-1.61615	0.035	0.623	1.3192e-90	oogonia_meiosis	ZNF771-E
4.88435e-92	-1.54727	0.05	0.628	6.76483e-89	oogonia_meiosis	ZNF579-E
8.57956e-92	1.23118	0.925	0.367	1.18827e-88	oogonia_meiosis	DMRTC2-E
8.35013e-90	-1.51972	0.045	0.669	1.15649e-86	oogonia_meiosis	NFKBIL1-E
9.20951e-90	-1.62186	0.01	0.538	1.27552e-86	oogonia_meiosis	ZNF467-E
6.12876e-88	-1.55047	0.04	0.649	8.48833e-85	oogonia_meiosis	MESP1-E
1.54266e-87	-1.54356	0.055	0.627	2.13659e-84	oogonia_meiosis	KLF16-E
3.30738e-87	-1.64792	0.025	0.65	4.58072e-84	PGC	NR6A1-B
6.0565e-86	-1.47001	0.055	0.672	8.38825e-83	oogonia_meiosis	THAP4-E
3.01105e-84	1.19633	0.9	0.352	4.17031e-81	oogonia_meiosis	DMRT1-E
6.80898e-84	-1.4539	0.085	0.613	9.43043e-81	oogonia_meiosis	ZNF668-E
3.22248e-83	-1.41413	0.08	0.605	4.46314e-80	oogonia_meiosis	ZNF414-E
1.32977e-82	1.04042	0.94	0.454	1.84174e-79	oogonia_meiosis	MSX1-E
1.69026e-82	-1.45382	0.08	0.589	2.341e-79	oogonia_meiosis	MIER2-E
2.14305e-82	-1.42197	0.07	0.642	2.96812e-79	oogonia_meiosis	THAP7-E
2.83279e-82	-1.53314	0.075	0.603	3.92342e-79	oogonia_meiosis	ELF4-E
4.73242e-82	-1.39951	0.07	0.615	6.5544e-79	oogonia_meiosis	ZNF580-E
9.94466e-82	-1.3805	0.075	0.644	1.37734e-78	oogonia_meiosis	ZNF511-E
1.41841e-81	-1.59727	0.01	0.593	1.9645e-78	oogonia_meiosis	MYC-AA
1.94511e-81	-1.49585	0.065	0.603	2.69398e-78	oogonia_meiosis	ZBTB42-E
2.05515e-81	1.01842	0.955	0.462	2.84639e-78	oogonia_meiosis	RCOR2-E
2.65616e-80	-1.47612	0.08	0.655	3.67878e-77	oogonia_meiosis	ATF5-E
2.7353e-79	-1.44379	0.07	0.577	3.78839e-76	oogonia_meiosis	ZBTB7C-E
7.84241e-79	-1.37885	0.085	0.598	1.08617e-75	oogonia_meiosis	ZNF628-E
4.15707e-78	-1.46423	0.07	0.59	5.75754e-75	oogonia_meiosis	GLIS3-E
5.21363e-78	-1.43486	0.09	0.562	7.22088e-75	oogonia_meiosis	MYNN-D
4.71335e-77	-1.38773	0.085	0.636	6.52799e-74	oogonia_meiosis	ZNF513-E
5.00743e-77	-1.38522	0.085	0.596	6.93529e-74	oogonia_meiosis	HMG20B-E
9.36672e-77	-1.63062	0.005	0.519	1.29729e-73	oogonia_meiosis	IRF5-E
1.28794e-76	1.16728	0.9	0.359	1.78379e-73	oogonia_meiosis	YBX3-E
2.93662e-76	-1.33409	0.105	0.613	4.06722e-73	oogonia_meiosis	ZBTB45-E
1.5473e-75	-1.32759	0.08	0.626	2.14302e-72	oogonia_meiosis	THAP8-E
3.33535e-75	-1.36947	0.09	0.627	4.61946e-72	oogonia_meiosis	NRL-E
4.14847e-75	-1.44855	0.075	0.553	5.74564e-72	oogonia_meiosis	ZIC1-E
4.78385e-75	1.17525	0.965	0.316	6.62563e-72	PGC_mitotic	E2F8-E
1.26915e-74	-1.45937	0.04	0.553	1.75777e-71	oogonia_meiosis	HIF1A-AA
1.66647e-74	1.11209	0.9	0.464	2.30805e-71	oocyte	KLF10-D
1.74903e-74	1.1136	0.92	0.37	2.42241e-71	PGC	NANOG-A
1.85253e-74	-1.36507	0.1	0.649	2.56576e-71	oogonia_meiosis	TFE3-E
2.99036e-74	-1.35003	0.09	0.662	4.14165e-71	oogonia_meiosis	NFKBIB-E
3.84005e-74	1.22531	0.925	0.343	5.31847e-71	PGC_mitotic	E2F1-AA
9.34438e-74	1.15873	0.865	0.378	1.2942e-70	oogonia_meiosis	TLX1-E
1.28536e-73	-1.30798	0.105	0.619	1.78022e-70	oogonia_meiosis	ZNF672-E
1.50979e-73	-1.30943	0.095	0.614	2.09106e-70	oogonia_meiosis	WIZ-E
5.26216e-73	0.946349	0.935	0.448	7.2881e-70	oogonia_meiosis	FOXP4-E
6.53387e-73	1.22555	0.935	0.432	9.04941e-70	oogonia_meiosis	FOXJ1-E
8.03524e-73	-1.45698	0.07	0.56	1.11288e-69	oogonia_meiosis	BATF3-E
9.75671e-73	-1.5413	0.03	0.522	1.3513e-69	oogonia_meiosis	KLF15-E
1.40054e-72	1.04145	0.91	0.409	1.93975e-69	oogonia_meiosis	ZBTB7B-E
1.65415e-72	-1.31919	0.09	0.655	2.291e-69	oogonia_meiosis	ETV2-E
5.55856e-72	-1.56432	0.035	0.531	7.6986e-69	oogonia_meiosis	GLIS2-E
9.32332e-72	-1.27182	0.08	0.563	1.29128e-68	oogonia_meiosis	ZNF768-E
1.15989e-71	-1.37652	0.09	0.548	1.60645e-68	oogonia_meiosis	BACH1-B
1.64466e-71	-1.46547	0.04	0.627	2.27785e-68	oogonia_meiosis	ARNTL2-E
3.11279e-71	0.99901	0.92	0.431	4.31121e-68	oogonia_meiosis	HES5-E
1.67294e-70	-1.43734	0.085	0.559	2.31702e-67	oogonia_meiosis	CUX1-C
2.16949e-69	1.04425	0.895	0.364	3.00475e-66	oogonia_meiosis	GATAD2A-E
2.00321e-68	1.11252	0.86	0.373	2.77445e-65	oogonia_meiosis	SIX6-E
2.17404e-68	-1.25245	0.12	0.677	3.01104e-65	oogonia_meiosis	GTF3A-E
5.64006e-68	-1.4153	0.05	0.646	7.81148e-65	PGC_mitotic	NR6A1-B
6.20265e-68	1.02613	0.9	0.396	8.59068e-65	oogonia_meiosis	FIZ1-E
1.14327e-67	-1.53304	0.025	0.557	1.58342e-64	PGC_mitotic	HSF5-E
4.79409e-67	-1.18988	0.105	0.592	6.63982e-64	oogonia_meiosis	ZNF408-E
6.57296e-67	-1.37697	0.08	0.53	9.10355e-64	oogonia_meiosis	ZNF175-D
8.77368e-67	-1.26915	0.12	0.598	1.21515e-63	oogonia_meiosis	TGIF1-E
1.00904e-66	1.15903	0.91	0.396	1.39752e-63	PGC	TP53-AA
1.92397e-66	1.13692	0.85	0.398	2.6647e-63	oogonia_meiosis	KLF12-E
1.94379e-66	-1.18343	0.125	0.579	2.69214e-63	oogonia_meiosis	ZNF341-E
2.30587e-66	-1.17136	0.12	0.616	3.19363e-63	oogonia_meiosis	ZNF777-E
2.51203e-66	1.07614	0.88	0.389	3.47916e-63	oogonia_meiosis	LHX1-E
4.44191e-66	-1.21946	0.12	0.655	6.15204e-63	oogonia_meiosis	ZNF16-E
6.12509e-66	-1.23771	0.095	0.573	8.48324e-63	oogonia_meiosis	ZNF205-E
1.4925e-65	1.14666	0.845	0.36	2.06711e-62	oogonia_meiosis	FOXN3-E
1.89717e-65	1.18889	0.895	0.341	2.62759e-62	PGC_mitotic	E2F2-A
2.09225e-65	-1.42146	0.06	0.547	2.89777e-62	oogonia_meiosis	IRF3-C
4.07124e-65	1.06765	0.94	0.408	5.63867e-62	PGC	NR2C2-B
4.14617e-65	-1.09534	0.1	0.616	5.74244e-62	oogonia_meiosis	THAP3-E
5.40376e-65	1.09178	0.88	0.379	7.48421e-62	oogonia_meiosis	TCF25-C
5.4572e-65	1.08876	0.845	0.393	7.55822e-62	oogonia_meiosis	SALL3-E
5.89431e-65	1.02672	0.97	0.422	8.16362e-62	oogonia_meiosis	SOX30-E
1.209e-64	1.01567	0.89	0.412	1.67446e-61	oogonia_meiosis	SIM1-E
1.49094e-64	-1.37143	0.08	0.557	2.06495e-61	oogonia_meiosis	SCX-E
2.15942e-64	1.13098	0.86	0.38	2.9908e-61	oogonia_meiosis	ZBTB4-E
9.43817e-64	0.989444	0.86	0.416	1.30719e-60	PGC	CEBPE-C
9.61362e-64	-1.25035	0.095	0.556	1.33149e-60	oogonia_meiosis	ZNF444-E
1.02406e-63	-1.33374	0.1	0.571	1.41832e-60	oogonia_meiosis	HOXB2-E
1.4091e-63	-1.48335	0.045	0.527	1.9516e-60	oogonia_meiosis	JDP2-E
1.97997e-63	-1.25872	0.115	0.597	2.74225e-60	oogonia_meiosis	ZNF362-E
3.32303e-63	-1.43653	0.075	0.536	4.6024e-60	oogonia_meiosis	ZNF837-E
3.85251e-63	-1.09678	0.125	0.61	5.33572e-60	oogonia_meiosis	ZFAT-E
6.88175e-63	-1.40435	0.07	0.577	9.53123e-60	PGC_mitotic	FOXJ1-E
1.15552e-62	1.50085	0.82	0.35	1.6004e-59	oogonia_STRA8	ZNF497-E
2.4427e-62	-1.474	0.03	0.589	3.38314e-59	oocyte	MYC-AA
4.47104e-62	-1.14428	0.155	0.665	6.19239e-59	oogonia_meiosis	MLX-E
6.80092e-62	-1.09517	0.12	0.672	9.41927e-59	oogonia_meiosis	ZNF32-E
7.54555e-62	-1.39939	0.095	0.545	1.04506e-58	oogonia_meiosis	GLIS1-E
1.64928e-61	-1.3497	0.1	0.6	2.28425e-58	oocyte	FOXK1-D
1.78962e-61	-1.48459	0.035	0.492	2.47863e-58	oocyte	E2F1-AA
2.94701e-61	-1.18165	0.145	0.688	4.0816e-58	oogonia_meiosis	DNAJC1-E
3.235e-61	-1.18909	0.11	0.582	4.48047e-58	oogonia_meiosis	ZNF775-E
6.50025e-61	-1.19335	0.14	0.613	9.00285e-58	oogonia_meiosis	ZBED4-E
8.27591e-61	-1.18014	0.115	0.584	1.14621e-57	oogonia_meiosis	ZNF48-E
9.008e-61	1.05008	0.91	0.442	1.24761e-57	oocyte	HNF1B-C
9.02659e-61	-1.17304	0.155	0.625	1.25018e-57	oogonia_meiosis	KLF14-E
1.02022e-60	-1.15871	0.125	0.59	1.41301e-57	oogonia_meiosis	MXD4-E
1.29499e-60	-1.14484	0.13	0.637	1.79356e-57	oogonia_meiosis	ZNF34-E
1.62963e-60	-1.32518	0.12	0.54	2.25703e-57	oogonia_meiosis	TONSL-E
7.05323e-60	0.992205	0.865	0.439	9.76872e-57	oogonia_meiosis	HES7-E
9.56129e-60	-1.44711	0.08	0.506	1.32424e-56	oogonia_meiosis	ZNF853-E
1.28605e-59	1.06005	0.9	0.468	1.78117e-56	PGC_mitotic	POU5F1-A
2.10176e-59	0.807497	0.96	0.499	2.91093e-56	PGC	HEYL-E
2.93738e-59	-1.17521	0.135	0.633	4.06827e-56	oogonia_meiosis	ZNF239-E
2.95184e-59	0.82347	0.955	0.464	4.08829e-56	PGC_mitotic	SSRP1-C
4.30528e-59	-1.29166	0.155	0.588	5.96281e-56	PGC_mitotic	KLF10-D
6.09074e-59	-1.20152	0.125	0.583	8.43567e-56	oogonia_meiosis	ZBTB22-E
7.44302e-59	1.045	0.885	0.372	1.03086e-55	PGC	ERG-AA
8.05865e-59	-1.13414	0.15	0.678	1.11612e-55	oogonia_meiosis	PHF5A-E
8.46272e-59	-1.22088	0.14	0.625	1.17209e-55	oogonia_STRA8	IRF6-E
8.96896e-59	-1.12277	0.115	0.551	1.2422e-55	oogonia_meiosis	MLXIP-E
7.42811e-58	0.943859	0.925	0.479	1.02879e-54	PGC_mitotic	ARNTL2-E
2.06902e-57	-0.756943	0.165	0.642	2.86559e-54	oogonia_meiosis	NFAT5-E
3.09806e-57	1.13733	0.91	0.456	4.29081e-54	PGC_mitotic	JARID2-D
3.34408e-57	-1.13374	0.115	0.588	4.63155e-54	oogonia_meiosis	JARID2-D
3.94644e-57	1.08232	0.895	0.438	5.46581e-54	PGC_mitotic	NFKBIE-E
5.54663e-57	0.969374	0.925	0.404	7.68208e-54	PGC	SP3-AA
1.08545e-56	-1.12901	0.11	0.586	1.50335e-53	oogonia_meiosis	SOX4-E
1.148e-56	-1.14336	0.14	0.617	1.58999e-53	oogonia_meiosis	ZSCAN5A-E
1.75518e-56	0.920451	0.945	0.461	2.43092e-53	PGC	POU5F1-A
2.30752e-56	1.08962	0.855	0.396	3.19592e-53	oogonia_STRA8	TFCP2L1-E
2.49055e-56	-1.45033	0.085	0.517	3.44941e-53	oogonia_meiosis	EPAS1-B
2.64838e-56	-1.21176	0.105	0.583	3.66801e-53	PGC_mitotic	NPAS3-E
4.49927e-56	1.35612	0.845	0.379	6.23149e-53	PGC_mitotic	IRF5-E
1.00416e-55	1.4297	0.86	0.398	1.39076e-52	oogonia_STRA8	YBX2-E
1.11599e-55	-1.06249	0.15	0.621	1.54564e-52	oogonia_meiosis	HMGXB3-E
1.37681e-55	1.0762	0.855	0.39	1.90688e-52	PGC_mitotic	SATB1-B
1.53739e-55	0.986866	0.895	0.368	2.12928e-52	PGC	DNMT3A-D
2.42668e-55	-1.07929	0.13	0.565	3.36096e-52	oogonia_meiosis	GLI4-E
2.71528e-55	-1.02291	0.145	0.593	3.76066e-52	oogonia_meiosis	ZBED3-E
4.85172e-55	-1.46224	0.03	0.491	6.71963e-52	oocyte	FOXM1-B
6.33422e-55	-1.39531	0.065	0.554	8.7729e-52	oogonia_meiosis	NR2C2-B
7.2459e-55	1.29448	0.85	0.355	1.00356e-51	PGC_mitotic	BCL3-C
9.83329e-55	-1.1647	0.13	0.573	1.36191e-51	oogonia_meiosis	SP1-AA
1.11394e-54	-0.986415	0.14	0.597	1.54281e-51	oogonia_meiosis	ZBTB17-E
1.11666e-54	-1.37714	0.055	0.527	1.54658e-51	oogonia_meiosis	HIVEP3-E
1.11753e-54	0.874445	0.935	0.364	1.54778e-51	PGC_mitotic	E2F4-AA
1.16309e-54	0.839019	0.9	0.457	1.61088e-51	oogonia_meiosis	KLF13-C
2.67316e-54	1.02549	0.835	0.373	3.70233e-51	oogonia_meiosis	FEZF2-E
2.90449e-54	1.02824	0.825	0.38	4.02272e-51	oogonia_meiosis	ELK3-E
3.31935e-54	-1.42281	0.085	0.522	4.5973e-51	oogonia_meiosis	EBF4-E
3.38897e-54	-1.12098	0.135	0.569	4.69373e-51	oogonia_STRA8	POU2F3-E
4.49378e-54	-1.04505	0.155	0.629	6.22388e-51	oogonia_meiosis	ZNF629-E
6.17001e-54	-0.989354	0.17	0.571	8.54546e-51	oogonia_meiosis	CRX-E
6.85107e-54	-1.36367	0.07	0.571	9.48873e-51	oogonia_meiosis	ZNF165-D
8.82584e-54	-1.16971	0.105	0.572	1.22238e-50	oogonia_meiosis	NHLH1-E
1.47143e-53	1.17424	0.9	0.445	2.03793e-50	oocyte	FOXA3-E
3.23858e-53	-1.05538	0.18	0.67	4.48543e-50	oogonia_meiosis	LYAR-E
3.27936e-53	1.03902	0.83	0.374	4.54191e-50	oogonia_meiosis	NEUROD6-E
4.00797e-53	-0.897429	0.18	0.633	5.55104e-50	oogonia_meiosis	ZNFX1-E
5.48281e-53	-0.983191	0.165	0.608	7.59369e-50	oogonia_meiosis	MEF2D-E
5.72165e-53	-1.22963	0.105	0.637	7.92449e-50	PGC_mitotic	ZNF93-E
7.21654e-53	0.914913	0.875	0.432	9.9949e-50	oogonia_meiosis	ZNF653-E
1.80431e-52	-1.18732	0.145	0.547	2.49897e-49	oogonia_STRA8	ADNP-D
1.89829e-52	-1.31706	0.105	0.524	2.62913e-49	oogonia_meiosis	TFAP2B-E
2.26637e-52	-1.29323	0.09	0.554	3.13892e-49	oogonia_meiosis	KLF1-C
3.49477e-52	0.850895	0.885	0.44	4.84026e-49	oogonia_meiosis	MLXIPL-E
5.27339e-52	-0.955189	0.155	0.627	7.30364e-49	oogonia_meiosis	ZNF595-E
6.6394e-52	1.04364	0.845	0.41	9.19557e-49	PGC_mitotic	NFKBIZ-E
6.69276e-52	0.922872	0.825	0.42	9.26947e-49	oogonia_meiosis	ARID5A-E
1.07538e-51	0.821706	0.94	0.488	1.4894e-48	oogonia_meiosis	ZC3H8-D
1.25248e-51	-1.08211	0.16	0.62	1.73469e-48	oogonia_meiosis	ZNF485-E
2.00447e-51	0.993601	0.835	0.402	2.77619e-48	oogonia_meiosis	ID2-E
2.24409e-51	-0.97804	0.195	0.605	3.10807e-48	oogonia_meiosis	NKX2-8-E
3.24559e-51	0.725232	0.955	0.509	4.49514e-48	PGC_mitotic	ZNF581-E
3.31986e-51	-1.01708	0.165	0.618	4.59801e-48	oogonia_meiosis	SP8-E
3.56877e-51	-1.04706	0.15	0.603	4.94275e-48	oogonia_meiosis	ZNF784-E
3.77497e-51	-1.18522	0.13	0.552	5.22833e-48	oogonia_meiosis	PTF1A-E
3.85169e-51	-1.30671	0.08	0.516	5.33459e-48	oogonia_meiosis	SOX12-E
3.95877e-51	-0.947277	0.17	0.62	5.48289e-48	oogonia_meiosis	DBP-E
4.2796e-51	-1.06333	0.145	0.539	5.92725e-48	oogonia_meiosis	RREB1-E
5.32115e-51	0.953211	0.81	0.427	7.36979e-48	PGC	MSC-B
7.80595e-51	-1.03513	0.2	0.586	1.08112e-47	oogonia_meiosis	DEAF1-D
1.10532e-50	-0.895854	0.19	0.598	1.53087e-47	oogonia_meiosis	HOXD12-E
1.15915e-50	-0.976803	0.145	0.577	1.60542e-47	oogonia_meiosis	ZNF213-E
1.17962e-50	-1.13646	0.155	0.575	1.63377e-47	oocyte	ZNF215-E
1.3322e-50	-1.11772	0.15	0.578	1.84509e-47	oogonia_meiosis	EGR3-E
2.46744e-50	0.992641	0.825	0.373	3.41741e-47	oogonia_meiosis	NKX2-2-E
4.53706e-50	0.869744	0.885	0.446	6.28383e-47	oogonia_meiosis	PATZ1-E
4.84959e-50	-1.25931	0.075	0.517	6.71668e-47	PGC_mitotic	ZIC5-E
6.76242e-50	-1.37504	0.09	0.5	9.36595e-47	oogonia_meiosis	PPP1R13L-E
9.51661e-50	0.812025	0.93	0.41	1.31805e-46	PGC_mitotic	NR2C2-B
1.07326e-49	0.777872	0.925	0.43	1.48646e-46	oocyte	SOX30-E
1.18876e-49	0.950326	0.89	0.366	1.64643e-46	PGC	NR1H3-B
1.66684e-49	-1.27989	0.11	0.547	2.30857e-46	oogonia_meiosis	NFYB-B
2.3667e-49	-0.890929	0.185	0.646	3.27789e-46	oogonia_meiosis	KAT5-E
2.56922e-49	1.22726	0.82	0.448	3.55836e-46	oogonia_STRA8	ZSCAN1-E
2.75637e-49	0.915533	0.86	0.446	3.81757e-46	oogonia_STRA8	NR4A2-B
3.88682e-49	-0.944664	0.18	0.65	5.38324e-46	oogonia_meiosis	ZNF22-E
4.48503e-49	1.3069	0.79	0.455	6.21176e-46	pre-spermatogonia	POU3F3-E
5.05408e-49	1.12042	0.865	0.412	6.9999e-46	PGC_mitotic	ZNF101-E
6.3613e-49	0.932151	0.85	0.439	8.8104e-46	oocyte	BARX2-E
1.16162e-48	-0.816663	0.215	0.675	1.60884e-45	oogonia_meiosis	ZNF277-E
1.28215e-48	-1.4426	0.045	0.482	1.77578e-45	oocyte	E2F2-A
1.85354e-48	-1.36714	0.075	0.51	2.56716e-45	oocyte	HOXA3-E
2.48715e-48	-1.14638	0.105	0.579	3.4447e-45	oogonia_meiosis	CTCF-AA
2.50297e-48	0.852397	0.925	0.457	3.46661e-45	PGC	IRX3-E
2.99966e-48	-0.903209	0.135	0.546	4.15453e-45	oogonia_meiosis	ZNF71-E
4.55134e-48	0.843292	0.88	0.454	6.3036e-45	PGC_mitotic	ZNF215-E
4.99781e-48	0.957605	0.85	0.336	6.92197e-45	PGC_mitotic	ZNF726-E
5.08669e-48	1.23407	0.815	0.412	7.04507e-45	oogonia_STRA8	ZNF837-E
6.53988e-48	0.822819	0.92	0.463	9.05774e-45	oogonia_meiosis	ZBTB7A-C
6.59993e-48	-0.827742	0.175	0.619	9.1409e-45	oogonia_meiosis	TADA2B-E
7.13811e-48	-0.807953	0.185	0.626	9.88628e-45	oogonia_meiosis	MTF1-E
8.10411e-48	-1.01577	0.195	0.636	1.12242e-44	oogonia_meiosis	ZFP69B-E
1.05268e-47	-0.838948	0.175	0.606	1.45796e-44	oogonia_meiosis	ETV5-E
1.7053e-47	-1.01755	0.14	0.563	2.36184e-44	oogonia_meiosis	ZNF574-E
1.78209e-47	-1.02956	0.14	0.515	2.46819e-44	oocyte	TFCP2L1-E
4.04166e-47	1.23508	0.83	0.424	5.5977e-44	oocyte	IRX1-E
4.07259e-47	-0.862378	0.18	0.624	5.64054e-44	oogonia_meiosis	KDM5A-D
4.20176e-47	-1.06864	0.125	0.603	5.81944e-44	PGC_mitotic	BCL6-B
4.50676e-47	0.851407	0.875	0.465	6.24187e-44	oocyte	RBPJ-B
4.66176e-47	-1.20763	0.1	0.497	6.45654e-44	PGC_mitotic	GATAD2A-E
5.75727e-47	-1.15638	0.115	0.545	7.97381e-44	oocyte	ZNF442-E
6.86605e-47	-1.23502	0.095	0.539	9.50948e-44	oogonia_meiosis	ZNF331-E
7.8597e-47	-1.04127	0.155	0.598	1.08857e-43	PGC	BCL6-B
1.2679e-46	-0.919819	0.14	0.558	1.75604e-43	oogonia_meiosis	ZNF329-E
1.3784e-46	-0.981516	0.175	0.618	1.90909e-43	oocyte	ZNF485-E
1.43476e-46	-1.00485	0.165	0.586	1.98715e-43	oogonia_meiosis	SOX3-E
1.48323e-46	-1.05703	0.19	0.59	2.05427e-43	oocyte	ZNF749-E
1.5486e-46	-1.21993	0.095	0.539	2.14481e-43	oogonia_meiosis	GCM2-E
1.89749e-46	-0.873244	0.15	0.574	2.62802e-43	oogonia_meiosis	ZNF335-E
1.9933e-46	1.07195	0.845	0.378	2.76072e-43	PGC_mitotic	MTA2-C
3.70314e-46	-1.24217	0.125	0.502	5.12885e-43	PGC_mitotic	HOXA6-E
3.71568e-46	1.07357	0.9	0.446	5.14622e-43	oocyte	EOMES-C
3.795e-46	0.952034	0.85	0.368	5.25608e-43	PGC	NR1H2-B
4.30001e-46	-1.04394	0.115	0.532	5.95552e-43	oogonia_meiosis	ZNF74-E
4.50317e-46	-0.776447	0.15	0.608	6.23689e-43	oogonia_meiosis	KAT8-E
6.00908e-46	-0.927343	0.185	0.641	8.32258e-43	oogonia_meiosis	ZNF35-E
6.316e-46	-1.25067	0.09	0.494	8.74766e-43	PGC_mitotic	YBX3-E
8.99602e-46	-1.30883	0.07	0.539	1.24595e-42	oogonia_meiosis	MEIS3-E
1.53421e-45	-0.882032	0.14	0.559	2.12488e-42	oogonia_meiosis	CXXC1-E
1.71239e-45	-0.797741	0.175	0.601	2.37166e-42	oogonia_meiosis	TFEB-E
1.93394e-45	-0.880287	0.185	0.605	2.67851e-42	oogonia_meiosis	ZFP64-E
2.4571e-45	0.949691	0.82	0.405	3.40308e-42	oogonia_meiosis	SOHLH1-E
3.64179e-45	0.850195	0.825	0.457	5.04388e-42	oogonia_meiosis	ZHX3-E
3.94121e-45	-0.892115	0.145	0.545	5.45857e-42	oogonia_meiosis	E4F1-E
4.94484e-45	-1.00462	0.14	0.535	6.84861e-42	oocyte	ZNF763-E
5.86276e-45	-1.32193	0.08	0.463	8.11992e-42	oocyte	E2F8-E
7.97663e-45	0.977068	0.83	0.38	1.10476e-41	PGC	MTA2-C
8.15775e-45	-0.835016	0.18	0.554	1.12985e-41	oogonia_meiosis	FOXI1-E
8.25418e-45	0.778812	0.85	0.457	1.1432e-41	oogonia_meiosis	TGIF2-C
8.82333e-45	-0.816742	0.19	0.64	1.22203e-41	oogonia_meiosis	GMEB1-E
9.4133e-45	-0.838391	0.195	0.595	1.30374e-41	oogonia_meiosis	MYT1L-E
1.11729e-44	-0.848016	0.17	0.603	1.54745e-41	oogonia_meiosis	SRY-E
1.20016e-44	0.932268	0.8	0.404	1.66223e-41	oogonia_meiosis	NHLH2-E
1.45634e-44	1.11046	0.835	0.405	2.01703e-41	PGC_mitotic	PLAGL2-E
1.52639e-44	-0.849753	0.18	0.594	2.11404e-41	oogonia_meiosis	HOXA11-E
2.59282e-44	1.00123	0.795	0.373	3.59106e-41	oogonia_meiosis	LRRFIP1-E
2.75071e-44	0.870045	0.82	0.41	3.80973e-41	oogonia_meiosis	ZNF438-E
2.81943e-44	-0.726847	0.19	0.539	3.90491e-41	oogonia_meiosis	KLF7-E
3.40349e-44	0.758942	0.91	0.447	4.71384e-41	oocyte	ISX-E
3.51308e-44	0.920534	0.835	0.368	4.86561e-41	oogonia_meiosis	HNF1A-AA
4.11419e-44	1.10711	0.825	0.409	5.69815e-41	PGC_mitotic	STAT3-AA
4.77254e-44	-0.7674	0.21	0.667	6.60997e-41	oogonia_meiosis	TOX4-E
7.70732e-44	-0.957493	0.16	0.578	1.06746e-40	oogonia_meiosis	ZNF526-E
8.553e-44	0.924034	0.8	0.399	1.18459e-40	oogonia_meiosis	ZBTB32-E
9.24138e-44	-1.24321	0.19	0.499	1.27993e-40	PGC_mitotic	CSRNP3-E
1.06167e-43	0.690203	0.885	0.476	1.47042e-40	PGC	SSRP1-C
1.13041e-43	-1.04935	0.185	0.571	1.56562e-40	oogonia_STRA8	ZNF792-E
1.13544e-43	-1.08714	0.155	0.588	1.57258e-40	oogonia_STRA8	SP5-E
1.41654e-43	0.863934	0.84	0.408	1.96191e-40	oocyte	ZNF202-E
1.82826e-43	-0.8411	0.18	0.593	2.53215e-40	oogonia_meiosis	KLF11-E
2.00812e-43	-1.19674	0.12	0.577	2.78124e-40	oocyte	CTCF-AA
2.29812e-43	0.912784	0.815	0.389	3.18289e-40	oogonia_meiosis	FOXE1-E
3.25941e-43	-0.954802	0.19	0.557	4.51428e-40	oogonia_meiosis	ELF5-C
3.28547e-43	0.845549	0.84	0.422	4.55038e-40	oogonia_meiosis	HAND1-E
3.64763e-43	-0.728704	0.17	0.586	5.05197e-40	oogonia_meiosis	GMEB2-E
5.43745e-43	-0.76207	0.185	0.613	7.53087e-40	oocyte	ZNF3-E
5.7001e-43	-0.882428	0.17	0.523	7.89464e-40	FGC_mitotic	KLF4-A
6.78822e-43	0.819474	0.875	0.462	9.40169e-40	PGC_mitotic	ZFX-C
7.07663e-43	-1.23506	0.105	0.527	9.80114e-40	oogonia_meiosis	GCM1-E
7.15436e-43	-0.894975	0.195	0.61	9.90879e-40	oogonia_meiosis	ZNF195-E
8.61226e-43	-0.702711	0.205	0.62	1.1928e-39	oogonia_meiosis	TCFL5-E
9.01661e-43	-1.29247	0.095	0.502	1.2488e-39	oogonia_STRA8	MTA2-C
1.02949e-42	-0.855505	0.185	0.614	1.42584e-39	oogonia_meiosis	ZNF121-E
1.22495e-42	1.12882	0.825	0.462	1.69656e-39	pre-spermatogonia	ZFPM2-E
1.3234e-42	-0.95884	0.205	0.666	1.8329e-39	oocyte	LYAR-E
1.53029e-42	0.673099	0.9	0.525	2.11946e-39	PGC_mitotic	ZNF16-E
1.66293e-42	-0.929042	0.165	0.589	2.30316e-39	oogonia_meiosis	ZNF563-E
1.71721e-42	0.940006	0.82	0.411	2.37834e-39	oogonia_meiosis	RERE-E
1.78874e-42	-1.09817	0.15	0.522	2.4774e-39	oogonia_STRA8	ZNF589-D
1.86241e-42	1.11019	0.785	0.392	2.57944e-39	oogonia_STRA8	ZFHX2-E
2.33594e-42	-0.851166	0.225	0.659	3.23528e-39	oocyte	PSPC1-E
2.86657e-42	-0.731736	0.19	0.568	3.9702e-39	oogonia_meiosis	EVX2-E
3.40546e-42	-1.26553	0.08	0.495	4.71656e-39	oogonia_meiosis	ZNF710-E
3.55602e-42	0.966276	0.81	0.457	4.92508e-39	pre-spermatogonia	POU3F4-E
4.40303e-42	-0.802942	0.185	0.612	6.0982e-39	oocyte	ZNF195-E
4.69748e-42	0.876378	0.86	0.44	6.50601e-39	PGC	STAT1-AA
4.85507e-42	-0.766833	0.2	0.613	6.72427e-39	oocyte	THAP2-E
5.01172e-42	-0.872711	0.155	0.579	6.94123e-39	oogonia_meiosis	ZNF324B-E
6.37222e-42	0.852305	0.835	0.386	8.82552e-39	oocyte	FOXE1-E
6.62443e-42	0.754559	0.88	0.377	9.17483e-39	PGC_mitotic	NANOG-A
6.91326e-42	-0.643764	0.175	0.601	9.57487e-39	oocyte	ZNF266-E
7.07317e-42	0.933436	0.78	0.382	9.79634e-39	oogonia_meiosis	IKZF3-E
7.44701e-42	-0.944293	0.185	0.528	1.03141e-38	oogonia_meiosis	TBX20-E
7.45162e-42	-0.57048	0.2	0.627	1.03205e-38	oogonia_meiosis	ZNF770-E
8.43058e-42	-0.810251	0.19	0.611	1.16763e-38	oocyte	TADA2A-E
1.00013e-41	-1.29798	0.105	0.505	1.38519e-38	PGC	HOXA6-E
1.08056e-41	-0.917883	0.19	0.64	1.49658e-38	oocyte	ZNF35-E
1.13375e-41	0.671775	0.905	0.472	1.57024e-38	oocyte	BCL6-B
1.19921e-41	0.975582	0.795	0.383	1.6609e-38	oogonia_meiosis	FEV-E
1.36998e-41	-0.980392	0.17	0.565	1.89742e-38	oogonia_meiosis	ZBTB12-E
1.42681e-41	-1.00549	0.155	0.585	1.97614e-38	oogonia_STRA8	RBPJ-B
1.69975e-41	-1.09429	0.165	0.548	2.35416e-38	oogonia_meiosis	SIX1-E
2.16011e-41	-0.911371	0.185	0.637	2.99176e-38	oocyte	ZFP69B-E
2.18068e-41	1.01016	0.815	0.451	3.02025e-38	oogonia_STRA8	GLI4-E
2.30486e-41	0.843106	0.855	0.449	3.19223e-38	oocyte	ZNF300-E
2.51499e-41	-1.09593	0.12	0.537	3.48327e-38	oogonia_meiosis	E2F7-C
2.51649e-41	0.798913	0.82	0.452	3.48534e-38	oogonia_meiosis	FOXP1-B
2.86956e-41	-0.8873	0.175	0.548	3.97434e-38	oogonia_meiosis	NKX2-5-E
3.22351e-41	0.919548	0.83	0.407	4.46457e-38	oogonia_meiosis	SPI1-AA
3.33688e-41	0.696028	0.89	0.375	4.62158e-38	PGC_mitotic	TFDP1-B
3.7286e-41	0.74417	0.88	0.412	5.16412e-38	PGC_mitotic	SP3-AA
4.32041e-41	-1.17176	0.09	0.504	5.98377e-38	PGC_mitotic	DMRTB1-E
4.6026e-41	0.991177	0.83	0.438	6.37461e-38	PGC	RELA-AA
4.83591e-41	0.795908	0.81	0.442	6.69773e-38	oogonia_meiosis	FOXN4-E
5.94237e-41	-0.99824	0.14	0.521	8.23018e-38	oogonia_meiosis	PLAGL2-E
8.02193e-41	-1.10293	0.18	0.542	1.11104e-37	PGC_mitotic	POU4F2-C
9.64219e-41	-0.924364	0.15	0.568	1.33544e-37	oocyte	ZBTB12-E
1.0621e-40	0.932737	0.785	0.39	1.47101e-37	oogonia_meiosis	SP140-E
1.0629e-40	-1.00601	0.15	0.563	1.47212e-37	oogonia_meiosis	DMRTA1-E
1.4184e-40	-0.899836	0.17	0.63	1.96448e-37	oocyte	ZNF34-E
1.63436e-40	-1.21064	0.13	0.502	2.26359e-37	pre-spermatogonia	TFDP1-B
1.65381e-40	0.948752	0.855	0.423	2.29053e-37	PGC_mitotic	KLF5-B
1.70019e-40	-0.889015	0.18	0.615	2.35476e-37	oocyte	ZNF121-E
1.8132e-40	1.02377	0.785	0.389	2.51129e-37	FGC_mitotic	E2F4-AA
2.12209e-40	-0.764735	0.165	0.57	2.9391e-37	oocyte	PRDM15-E
2.64702e-40	0.792317	0.85	0.514	3.66612e-37	oogonia_STRA8	MESP1-E
2.65853e-40	-0.995749	0.185	0.543	3.68207e-37	oogonia_meiosis	NFE2L2-A
2.76785e-40	-0.577965	0.205	0.62	3.83347e-37	oogonia_meiosis	TFDP2-E
2.91785e-40	-0.753865	0.195	0.604	4.04123e-37	oocyte	SFPQ-E
3.29982e-40	-1.06937	0.18	0.552	4.57026e-37	oogonia_STRA8	MAF-C
3.34973e-40	-0.617219	0.195	0.647	4.63937e-37	oogonia_meiosis	CREBL2-E
3.65102e-40	-0.77254	0.19	0.61	5.05666e-37	oogonia_meiosis	TBX19-E
3.7657e-40	-0.81437	0.215	0.647	5.2155e-37	oocyte	DNAJC2-E
5.04361e-40	0.904017	0.85	0.424	6.9854e-37	PGC_mitotic	E2F5-C
5.12988e-40	-0.791361	0.16	0.57	7.10488e-37	oogonia_meiosis	ZNF692-E
5.42233e-40	0.941577	0.825	0.411	7.50992e-37	PGC_mitotic	NKX3-1-D
5.46615e-40	-0.803902	0.18	0.551	7.57062e-37	oogonia_meiosis	ZNF282-E
5.88699e-40	0.874114	0.855	0.493	8.15348e-37	PGC_mitotic	ZBED4-E
6.28771e-40	-0.391594	0.165	0.554	8.70848e-37	oocyte	ZSCAN9-E
6.96037e-40	-0.766402	0.195	0.552	9.64011e-37	oogonia_meiosis	EMX1-E
7.08278e-40	0.72885	0.85	0.49	9.80965e-37	oogonia_meiosis	HIC2-E
8.7717e-40	-0.771059	0.17	0.593	1.21488e-36	oocyte	ZNF317-E
9.48808e-40	-0.821185	0.175	0.597	1.3141e-36	oogonia_meiosis	HOMEZ-E
9.55014e-40	-0.696558	0.205	0.644	1.32269e-36	oogonia_meiosis	ZFP42-E
1.06153e-39	-1.00479	0.2	0.588	1.47022e-36	oogonia_STRA8	CDX2-A
1.06766e-39	0.666802	0.87	0.509	1.47872e-36	pre-spermatogonia	NR6A1-B
1.15469e-39	0.92769	0.79	0.396	1.59924e-36	oogonia_meiosis	FOXN1-E
1.16038e-39	-0.979931	0.175	0.584	1.60713e-36	PGC_mitotic	HOXB9-E
1.16673e-39	-0.945741	0.16	0.549	1.61592e-36	oogonia_meiosis	ZSCAN22-E
1.18367e-39	-1.12579	0.165	0.55	1.63939e-36	PGC_mitotic	PRDM1-C
1.46814e-39	1.27799	0.775	0.478	2.03337e-36	pre-spermatogonia	GATA6-B
1.57672e-39	-0.758256	0.19	0.576	2.18376e-36	oogonia_meiosis	POU6F1-E
1.83113e-39	0.908638	0.825	0.434	2.53611e-36	PGC_mitotic	BATF3-E
1.91084e-39	-0.941259	0.185	0.568	2.64651e-36	oogonia_STRA8	ZNF92-D
1.91209e-39	-0.720229	0.205	0.649	2.64824e-36	oogonia_meiosis	DNAJC2-E
1.94632e-39	-0.792135	0.185	0.575	2.69565e-36	oocyte	ZNF79-E
1.96547e-39	0.734145	0.88	0.37	2.72218e-36	PGC_mitotic	DNMT3A-D
2.4619e-39	0.95901	0.83	0.421	3.40973e-36	PGC	ZBTB16-D
2.57183e-39	-0.975788	0.19	0.643	3.56199e-36	oocyte	ZNF16-E
2.63158e-39	0.817304	0.88	0.444	3.64473e-36	oocyte	CREB1-AA
2.73586e-39	-0.590239	0.175	0.585	3.78917e-36	oocyte	ZNF26-E
2.79061e-39	-1.16365	0.1	0.504	3.865e-36	PGC_mitotic	DMRTC2-E
2.82876e-39	0.792156	0.815	0.378	3.91783e-36	oocyte	GATAD2A-E
2.89544e-39	-1.15723	0.1	0.5	4.01018e-36	PGC_mitotic	SIX6-E
2.97707e-39	0.692938	0.8	0.329	4.12324e-36	oogonia_STRA8	ZNF487-E
3.13201e-39	0.933474	0.835	0.464	4.33783e-36	oocyte	SPDEF-B
3.20667e-39	-0.899554	0.19	0.624	4.44124e-36	oocyte	ZNF239-E
3.2499e-39	0.871471	0.81	0.397	4.50111e-36	PGC_mitotic	E2F3-A
3.27225e-39	0.755297	0.85	0.458	4.53207e-36	oogonia_meiosis	ZGPAT-E
3.28847e-39	0.913699	0.785	0.382	4.55453e-36	oogonia_meiosis	ZNF281-E
3.59428e-39	-0.88422	0.155	0.579	4.97807e-36	oocyte	ZNF324B-E
3.64087e-39	-1.04861	0.14	0.54	5.0426e-36	oogonia_meiosis	RARB-D
3.6866e-39	1.10509	0.79	0.445	5.10594e-36	pre-spermatogonia	MKX-E
3.85316e-39	-0.930641	0.16	0.609	5.33662e-36	oocyte	ZBED4-E
4.08919e-39	-0.857633	0.135	0.545	5.66353e-36	oogonia_meiosis	ZGLP1-E
4.16797e-39	-0.906803	0.2	0.565	5.77264e-36	oogonia_STRA8	EBF1-C
4.39272e-39	-0.8408	0.185	0.541	6.08391e-36	FGC_mitotic	YBX1-A
6.91669e-39	-0.799983	0.165	0.539	9.57961e-36	oogonia_meiosis	ZNF667-E
7.00694e-39	1.04414	0.85	0.458	9.70461e-36	oocyte	ASCL1-C
7.27646e-39	-1.02574	0.135	0.579	1.00779e-35	PGC_mitotic	HOXC8-E
7.6484e-39	-0.75402	0.17	0.55	1.0593e-35	oogonia_meiosis	MIXL1-E
8.96444e-39	-1.13366	0.16	0.584	1.24158e-35	oogonia_STRA8	IRX3-E
9.41772e-39	0.888283	0.825	0.44	1.30435e-35	PGC	PPARD-A
9.43991e-39	0.670155	0.87	0.502	1.30743e-35	PGC	SOX7-E
9.80244e-39	-0.597212	0.2	0.614	1.35764e-35	oocyte	ZNF761-E
9.89477e-39	-1.04042	0.16	0.607	1.37043e-35	oocyte	ARNTL2-E
1.23627e-38	-0.559784	0.195	0.629	1.71224e-35	oogonia_meiosis	NFX1-E
1.33331e-38	0.718458	0.885	0.459	1.84664e-35	PGC	CEBPD-A
1.42302e-38	-1.0738	0.145	0.527	1.97089e-35	oogonia_meiosis	GATA5-E
1.66331e-38	-1.27113	0.1	0.544	2.30368e-35	PGC	HSF5-E
1.73794e-38	0.855853	0.79	0.395	2.40705e-35	oogonia_meiosis	ERF-E
1.90633e-38	-1.06014	0.15	0.54	2.64027e-35	oogonia_meiosis	SOX15-E
1.91864e-38	0.782547	0.825	0.41	2.65732e-35	oogonia_meiosis	ZNF202-E
1.97841e-38	0.933645	0.835	0.448	2.7401e-35	PGC_mitotic	ZNF574-E
2.08212e-38	-1.19371	0.095	0.517	2.88374e-35	oogonia_meiosis	SATB1-B
2.10377e-38	0.852682	0.8	0.397	2.91372e-35	oogonia_meiosis	ZNF536-E
2.15527e-38	-1.16473	0.1	0.506	2.98504e-35	PGC_mitotic	TLX1-E
2.20775e-38	-1.04513	0.17	0.556	3.05774e-35	FGC_mitotic	SOX30-E
2.38845e-38	-1.13202	0.12	0.515	3.308e-35	oogonia_meiosis	TBX6-E
2.89167e-38	-0.730841	0.215	0.661	4.00496e-35	oogonia_meiosis	PSPC1-E
3.07491e-38	1.0252	0.77	0.422	4.25875e-35	oogonia_STRA8	HOXA7-E
4.03676e-38	0.576828	0.915	0.516	5.59091e-35	PGC	ZNF581-E
4.07615e-38	0.943807	0.805	0.396	5.64546e-35	PGC_mitotic	ZNF440-E
4.48878e-38	0.924972	0.79	0.425	6.21696e-35	PGC_mitotic	E2F7-C
4.84781e-38	-1.13494	0.13	0.512	6.71422e-35	PGC_mitotic	SALL3-E
5.02873e-38	-0.499629	0.19	0.579	6.96479e-35	oocyte	ZNF558-E
5.31205e-38	-0.893282	0.23	0.605	7.35719e-35	PGC_mitotic	ID1-E
5.45117e-38	0.989804	0.805	0.442	7.54988e-35	PGC_mitotic	ZSCAN22-E
6.07916e-38	0.838927	0.815	0.45	8.41964e-35	oocyte	TOX3-E
6.10618e-38	-0.67004	0.175	0.568	8.45706e-35	oogonia_meiosis	ZNF76-E
6.62009e-38	-1.01386	0.155	0.555	9.16882e-35	oogonia_meiosis	PRDM6-E
6.72603e-38	-1.13162	0.135	0.529	9.31556e-35	oogonia_meiosis	PAX1-E
7.52836e-38	0.797086	0.86	0.502	1.04268e-34	PGC_mitotic	ZNF121-E
8.45852e-38	-0.500491	0.2	0.585	1.17151e-34	oogonia_meiosis	HIVEP2-E
8.74161e-38	1.03706	0.8	0.423	1.21071e-34	pre-spermatogonia	ARNT2-E
1.05655e-37	1.06374	0.805	0.438	1.46333e-34	oogonia_STRA8	ZNF517-E
1.0584e-37	-0.66646	0.195	0.599	1.46588e-34	oogonia_meiosis	ZNF689-E
1.36241e-37	0.626595	0.91	0.548	1.88694e-34	PGC_mitotic	LYAR-E
1.5362e-37	-0.815994	0.185	0.586	2.12764e-34	oogonia_meiosis	GSC-E
1.61598e-37	-0.580265	0.21	0.648	2.23813e-34	oogonia_meiosis	PRDM4-E
1.69828e-37	-1.07288	0.125	0.536	2.35212e-34	oogonia_meiosis	ZNF101-E
1.71887e-37	0.734986	0.89	0.446	2.38064e-34	PGC	SRF-A
1.95103e-37	1.07081	0.785	0.423	2.70217e-34	pre-spermatogonia	ID4-E
2.01823e-37	-0.516819	0.195	0.593	2.79525e-34	oocyte	ZNF286A-E
2.12801e-37	-0.876264	0.145	0.507	2.9473e-34	oogonia_meiosis	CIC-E
2.7533e-37	-0.872095	0.215	0.667	3.81332e-34	oocyte	PHF5A-E
2.83325e-37	1.11153	0.81	0.435	3.92406e-34	oogonia_STRA8	SCX-E
2.89961e-37	-0.996514	0.195	0.546	4.01596e-34	PGC	FOXO3-AA
3.04028e-37	-0.704776	0.2	0.542	4.21079e-34	oogonia_meiosis	LBX2-E
3.29737e-37	-0.616343	0.195	0.573	4.56686e-34	oogonia_meiosis	HOXD11-E
3.71167e-37	-0.601931	0.18	0.602	5.14067e-34	oocyte	ZNF343-E
3.74007e-37	0.911174	0.74	0.353	5.18e-34	FGC_mitotic	E2F8-E
4.19175e-37	-0.629197	0.205	0.574	5.80557e-34	oogonia_meiosis	ARID5B-E
4.39928e-37	-1.36561	0.06	0.487	6.09301e-34	oogonia_meiosis	BCL3-C
4.57897e-37	0.786124	0.855	0.462	6.34187e-34	PGC_mitotic	OTX1-E
4.76131e-37	0.670601	0.865	0.508	6.59442e-34	PGC_mitotic	ZNF595-E
5.11035e-37	0.94057	0.805	0.443	7.07783e-34	oocyte	PRDM1-C
5.17278e-37	-0.748705	0.17	0.593	7.1643e-34	oogonia_meiosis	ZNF749-E
5.40255e-37	0.752591	0.82	0.463	7.48253e-34	oogonia_meiosis	MXD3-E
5.52331e-37	-0.621613	0.21	0.616	7.64978e-34	oogonia_meiosis	ZNF480-E
6.00755e-37	0.896287	0.815	0.474	8.32046e-34	oogonia_STRA8	HMG20B-E
6.21548e-37	0.702625	0.9	0.487	8.60843e-34	oogonia_meiosis	TBX3-E
6.22099e-37	1.16216	0.755	0.424	8.61607e-34	oogonia_STRA8	HOXA4-E
7.73343e-37	0.864441	0.795	0.488	1.07108e-33	oogonia_STRA8	ZNF575-E
8.21129e-37	-0.83573	0.2	0.557	1.13726e-33	oogonia_meiosis	SCRT2-E
9.37879e-37	0.892396	0.815	0.475	1.29896e-33	PGC_mitotic	IRX3-E
9.6986e-37	-0.74809	0.205	0.636	1.34326e-33	oocyte	YY2-E
1.06639e-36	-0.744401	0.215	0.636	1.47695e-33	oocyte	GMEB1-E
1.07801e-36	-0.652677	0.16	0.538	1.49304e-33	oogonia_meiosis	ZBTB48-E
1.08034e-36	-0.462267	0.175	0.587	1.49627e-33	oocyte	ZNF7-E
1.12833e-36	0.896026	0.825	0.359	1.56273e-33	PGC	BCL3-C
1.13776e-36	-0.786737	0.2	0.588	1.5758e-33	oogonia_meiosis	POU6F2-E
1.17024e-36	-0.732873	0.21	0.551	1.62078e-33	oogonia_STRA8	BCL11B-E
1.20852e-36	-0.891254	0.23	0.673	1.6738e-33	oocyte	DNAJC1-E
1.31917e-36	-0.931592	0.19	0.573	1.82705e-33	oocyte	OTX1-E
1.51713e-36	0.72611	0.87	0.527	2.10123e-33	PGC_mitotic	ZNF35-E
1.54942e-36	-0.646993	0.185	0.612	2.14595e-33	oogonia_meiosis	TADA2A-E
1.56941e-36	0.75151	0.88	0.5	2.17364e-33	PGC_mitotic	ZNF485-E
1.57368e-36	-0.81913	0.215	0.592	2.17954e-33	oogonia_STRA8	KLF6-B
1.71063e-36	-0.586911	0.195	0.579	2.36922e-33	oogonia_meiosis	HOXC12-E
1.78042e-36	0.626622	0.86	0.5	2.46588e-33	oogonia_meiosis	ID1-E
1.79477e-36	-1.02087	0.175	0.63	2.48575e-33	oogonia_STRA8	HEYL-E
1.83454e-36	-0.656962	0.18	0.575	2.54084e-33	oogonia_meiosis	ZNF197-D
1.83553e-36	-1.00475	0.135	0.529	2.54221e-33	oogonia_meiosis	ZNF786-E
1.85318e-36	-1.0147	0.17	0.556	2.56666e-33	PGC_mitotic	ZSCAN1-E
2.297e-36	-1.05308	0.18	0.49	3.18134e-33	oogonia_STRA8	ERG-AA
2.47722e-36	0.731082	0.86	0.468	3.43095e-33	oocyte	IRX2-E
2.4986e-36	1.09433	0.795	0.409	3.46056e-33	PGC_mitotic	TFAP2B-E
2.54614e-36	-1.15078	0.07	0.49	3.5264e-33	PGC_mitotic	DMRT1-E
2.61122e-36	-1.04898	0.195	0.543	3.61654e-33	PGC_mitotic	OLIG1-E
2.68472e-36	-0.840745	0.17	0.582	3.71833e-33	oocyte	NONO-C
2.79984e-36	0.787209	0.815	0.445	3.87778e-33	oocyte	BNC1-E
2.8911e-36	-0.525177	0.17	0.564	4.00417e-33	oocyte	ZNF700-E
2.90094e-36	-0.746219	0.175	0.567	4.01781e-33	oocyte	ZBTB39-E
2.93535e-36	0.802207	0.805	0.41	4.06546e-33	oogonia_meiosis	THAP11-C
2.9529e-36	0.743064	0.845	0.451	4.08976e-33	oocyte	MYRF-E
3.12553e-36	0.805984	0.82	0.448	4.32886e-33	FGC_mitotic	SMAD5-C
3.61067e-36	-0.892668	0.185	0.549	5.00077e-33	oogonia_meiosis	ZNF766-D
3.63222e-36	0.711669	0.885	0.454	5.03062e-33	oogonia_meiosis	HOXC8-E
3.70938e-36	-1.05632	0.15	0.577	5.13749e-33	oocyte	GLIS3-E
3.93165e-36	-0.583299	0.225	0.613	5.44533e-33	oogonia_meiosis	ZNF468-E
4.04864e-36	0.602133	0.89	0.446	5.60737e-33	FGC_mitotic	MYC-AA
4.48063e-36	-0.919097	0.17	0.558	6.20567e-33	oogonia_meiosis	ZNF697-E
4.77326e-36	-0.615557	0.22	0.642	6.61097e-33	oogonia_meiosis	TFAM-E
4.84555e-36	0.975394	0.74	0.4	6.71109e-33	FGC_mitotic	TFDP1-B
5.70472e-36	-0.842218	0.195	0.539	7.90103e-33	oogonia_meiosis	ZNF517-E
6.38667e-36	-0.514716	0.21	0.588	8.84554e-33	oogonia_meiosis	ZNF407-E
6.56312e-36	-0.862316	0.19	0.573	9.08992e-33	oogonia_meiosis	OTX1-E
7.13081e-36	-0.748181	0.19	0.557	9.87617e-33	oogonia_meiosis	HSF4-E
8.00631e-36	0.964066	0.825	0.458	1.10887e-32	PGC	NFKB1-AA
9.53977e-36	1.11466	0.785	0.38	1.32126e-32	PGC_mitotic	CSRNP1-E
9.71354e-36	0.844416	0.81	0.412	1.34533e-32	oogonia_meiosis	ZIC2-E
1.00976e-35	-0.326782	0.22	0.616	1.39852e-32	oogonia_meiosis	ARID4A-E
1.06738e-35	0.995095	0.76	0.425	1.47832e-32	PGC_mitotic	ZNF786-E
1.25604e-35	-1.1189	0.115	0.649	1.73961e-32	oocyte	ZNF581-E
1.27707e-35	-1.03409	0.14	0.527	1.76874e-32	oocyte	NFKBIZ-E
1.31236e-35	-0.600345	0.2	0.569	1.81762e-32	oogonia_meiosis	NR2E3-E
1.32672e-35	-0.73318	0.215	0.545	1.83751e-32	oogonia_STRA8	BNC1-E
1.32751e-35	0.650606	0.89	0.529	1.8386e-32	PGC_mitotic	NFKBIB-E
1.34632e-35	-0.959868	0.14	0.532	1.86466e-32	oogonia_meiosis	FOXD2-E
1.50945e-35	-0.992521	0.205	0.541	2.09058e-32	oogonia_meiosis	ATRX-D
1.57609e-35	-1.15471	0.15	0.533	2.18288e-32	oocyte	SP3-AA
1.59472e-35	0.841279	0.815	0.405	2.20869e-32	PGC_mitotic	TFEC-E
1.61682e-35	-1.09307	0.15	0.547	2.23929e-32	oogonia_meiosis	HEY2-E
1.65796e-35	0.858765	0.815	0.41	2.29627e-32	oocyte	MYT1-E
1.67367e-35	-0.436172	0.215	0.618	2.31803e-32	oogonia_meiosis	ZNF483-E
1.95936e-35	-0.677623	0.14	0.518	2.71372e-32	oogonia_meiosis	ZNF319-E
2.00782e-35	-1.03132	0.185	0.499	2.78083e-32	PGC_mitotic	NR2F2-B
2.04262e-35	-0.451919	0.23	0.643	2.82904e-32	oogonia_meiosis	ZC3H6-E
2.21389e-35	-0.606422	0.21	0.578	3.06624e-32	oogonia_meiosis	ZNF836-E
2.25808e-35	0.900507	0.79	0.441	3.12744e-32	PGC	GLI1-B
2.26013e-35	-0.3302	0.185	0.574	3.13028e-32	oocyte	ZNF354B-E
2.34905e-35	0.789131	0.86	0.478	3.25344e-32	oocyte	MYCL-E
2.62817e-35	-0.556869	0.23	0.642	3.64002e-32	oogonia_meiosis	ZNF146-E
3.41565e-35	-1.03433	0.17	0.574	4.73068e-32	oocyte	EGR3-E
3.71962e-35	-1.11002	0.115	0.517	5.15168e-32	oocyte	NFATC4-E
3.80344e-35	-0.75101	0.185	0.566	5.26776e-32	oocyte	ZNF530-E
3.82959e-35	-0.580691	0.2	0.588	5.30398e-32	oocyte	ST18-E
4.57657e-35	0.908549	0.78	0.4	6.33855e-32	oogonia_STRA8	ZNF334-E
4.72369e-35	-0.590658	0.16	0.539	6.54231e-32	oogonia_meiosis	TSHZ1-E
4.80011e-35	0.820884	0.82	0.386	6.64815e-32	oogonia_STRA8	HOXA6-E
5.04152e-35	-0.894303	0.2	0.551	6.9825e-32	oogonia_meiosis	NFE2L1-B
5.61379e-35	-0.904376	0.195	0.53	7.7751e-32	oogonia_meiosis	SREBF2-A
5.95548e-35	-0.658329	0.21	0.562	8.24833e-32	oogonia_meiosis	HMX1-E
5.98693e-35	-0.567479	0.175	0.562	8.2919e-32	oocyte	ZNF846-E
6.04373e-35	0.616074	0.895	0.531	8.37057e-32	PGC_mitotic	ZNF22-E
6.10787e-35	-0.837707	0.19	0.621	8.4594e-32	oocyte	ZNF595-E
6.24134e-35	-1.02598	0.195	0.562	8.64426e-32	oogonia_STRA8	SRF-A
6.55298e-35	-0.750981	0.165	0.548	9.07587e-32	oogonia_meiosis	ZNF57-E
7.43624e-35	0.818899	0.83	0.447	1.02992e-31	pre-spermatogonia	EMX2-E
7.86085e-35	-0.746107	0.165	0.533	1.08873e-31	oocyte	ZNF814-E
8.08685e-35	0.885609	0.81	0.418	1.12003e-31	oogonia_meiosis	ZBED6-E
9.06027e-35	-0.847907	0.21	0.609	1.25485e-31	oogonia_STRA8	HOPX-E
9.19671e-35	-0.649886	0.18	0.548	1.27374e-31	oogonia_meiosis	ZNF324-E
9.28528e-35	0.77415	0.845	0.462	1.28601e-31	pre-spermatogonia	PRDM8-E
9.82439e-35	-0.280364	0.185	0.546	1.36068e-31	oocyte	ZFP62-E
1.02185e-34	0.704578	0.825	0.372	1.41526e-31	oocyte	YBX3-E
1.05156e-34	-0.471905	0.175	0.537	1.45641e-31	oocyte	ZNF44-E
1.09677e-34	-1.077	0.135	0.547	1.51902e-31	oogonia_meiosis	NFKBIA-B
1.31883e-34	-0.842216	0.21	0.575	1.82658e-31	oogonia_meiosis	NONO-C
1.33439e-34	-0.777691	0.165	0.539	1.84814e-31	oogonia_meiosis	ZNF740-C
1.3416e-34	0.733185	0.86	0.505	1.85812e-31	PGC_mitotic	TADA2B-E
1.34392e-34	-0.59833	0.21	0.601	1.86132e-31	oogonia_meiosis	HLF-E
1.35894e-34	-1.08478	0.19	0.587	1.88213e-31	oogonia_STRA8	POU5F1-A
1.46234e-34	-1.10486	0.13	0.514	2.02534e-31	PGC_mitotic	LHX1-E
1.70811e-34	-1.03373	0.195	0.581	2.36573e-31	PGC	HOXB9-E
2.22262e-34	0.887879	0.77	0.421	3.07833e-31	oogonia_meiosis	HNF4A-AA
2.31415e-34	-0.348968	0.2	0.56	3.2051e-31	oogonia_meiosis	KAT6B-E
2.40256e-34	0.91954	0.795	0.398	3.32754e-31	oogonia_STRA8	NR2F2-B
2.54079e-34	0.791168	0.8	0.379	3.51899e-31	oocyte	FEZF2-E
2.55628e-34	-0.64979	0.205	0.565	3.54045e-31	oocyte	ZNF350-E
2.65841e-34	0.89209	0.85	0.452	3.6819e-31	PGC_mitotic	SRF-A
2.66331e-34	0.836101	0.785	0.458	3.68868e-31	FGC_mitotic	NR4A2-B
2.83603e-34	-0.923582	0.15	0.515	3.9279e-31	oogonia_STRA8	SOX9-A
3.1197e-34	-0.796931	0.23	0.642	4.32078e-31	oocyte	ZNF22-E
3.14204e-34	-0.50149	0.235	0.645	4.35173e-31	oogonia_meiosis	CDC5L-E
3.38203e-34	0.773854	0.84	0.478	4.68411e-31	PGC_mitotic	TGIF1-E
3.84396e-34	-0.595598	0.19	0.581	5.32388e-31	oogonia_meiosis	ZNF687-E
4.47006e-34	-0.536257	0.23	0.632	6.19103e-31	oogonia_meiosis	YY2-E
4.48746e-34	-0.300442	0.22	0.598	6.21513e-31	oogonia_meiosis	KAT6A-E
4.5518e-34	0.875427	0.82	0.468	6.30424e-31	PGC_mitotic	ZNF526-E
5.03867e-34	-1.10032	0.16	0.557	6.97856e-31	PGC	SMAD5-C
5.10817e-34	-0.933315	0.17	0.563	7.07481e-31	PGC_mitotic	POU3F4-E
5.27493e-34	-0.703152	0.22	0.528	7.30578e-31	oogonia_meiosis	SHOX-E
5.40167e-34	0.814183	0.835	0.474	7.48132e-31	PGC	SP5-E
5.48155e-34	-1.11064	0.165	0.53	7.59195e-31	oogonia_meiosis	ASCL2-E
5.53421e-34	-0.799321	0.195	0.598	7.66488e-31	oocyte	KMT2B-D
6.48452e-34	-1.03548	0.175	0.531	8.98106e-31	PGC_mitotic	SIM1-E
6.5777e-34	0.773624	0.84	0.42	9.11012e-31	PGC_mitotic	TONSL-E
6.60432e-34	-0.766874	0.18	0.598	9.14699e-31	oocyte	MYT1L-E
7.2e-34	-0.68525	0.195	0.599	9.972e-31	oocyte	ZNF689-E
8.04174e-34	-0.605018	0.205	0.607	1.11378e-30	oocyte	ZBTB24-E
9.28244e-34	0.730858	0.83	0.378	1.28562e-30	oocyte	SIX6-E
9.43411e-34	-0.659292	0.23	0.642	1.30662e-30	oocyte	ZNF146-E
9.89406e-34	-0.644478	0.19	0.568	1.37033e-30	oocyte	GSC2-E
1.02887e-33	0.532197	0.915	0.551	1.42498e-30	PGC_mitotic	PHF5A-E
1.09002e-33	-1.03303	0.15	0.537	1.50967e-30	oogonia_meiosis	NFIA-D
1.09943e-33	-0.797984	0.19	0.614	1.52272e-30	oocyte	HMGXB3-E
1.15457e-33	-0.888922	0.2	0.578	1.59908e-30	oocyte	MXD4-E
1.17075e-33	-0.666322	0.205	0.599	1.62148e-30	oocyte	KAT8-E
1.25415e-33	-0.71042	0.175	0.552	1.737e-30	oocyte	NFE2L3-E
1.27617e-33	-0.920124	0.215	0.632	1.76749e-30	oocyte	ATF5-E
1.40114e-33	0.920007	0.76	0.371	1.94058e-30	oogonia_meiosis	SMARCA5-E
1.40183e-33	-0.591052	0.2	0.588	1.94154e-30	oogonia_meiosis	ZNF317-E
1.4479e-33	0.815994	0.8	0.448	2.00534e-30	FGC_mitotic	ATF1-A
1.63936e-33	0.635404	0.785	0.344	2.27051e-30	oogonia_STRA8	ZNF19-E
1.78709e-33	-0.729344	0.21	0.62	2.47512e-30	oocyte	ZNF629-E
1.87335e-33	0.696492	0.825	0.364	2.59458e-30	oocyte	DMRT1-E
1.92124e-33	0.816024	0.785	0.396	2.66092e-30	oocyte	ERF-E
2.09507e-33	-0.646633	0.21	0.627	2.90167e-30	oocyte	NFX1-E
2.16973e-33	-0.916107	0.16	0.562	3.00507e-30	PGC_mitotic	NR4A2-B
2.21045e-33	-0.843877	0.18	0.544	3.06147e-30	oogonia_meiosis	ZSCAN2-E
2.38297e-33	0.713471	0.825	0.472	3.30041e-30	oogonia_meiosis	MXI1-C
2.72339e-33	-0.6235	0.17	0.542	3.7719e-30	oocyte	ZNF77-E
2.76253e-33	-0.739244	0.18	0.542	3.8261e-30	oogonia_meiosis	ZNF823-E
2.92197e-33	-1.11825	0.125	0.512	4.04693e-30	oogonia_meiosis	SALL4-E
2.93697e-33	0.890556	0.785	0.383	4.0677e-30	PGC_mitotic	NR1H3-B
3.02034e-33	0.554267	0.905	0.438	4.18318e-30	oocyte	FOXJ1-E
3.0798e-33	-0.467183	0.175	0.583	4.26552e-30	oogonia_meiosis	ZNF778-E
3.30775e-33	-0.426584	0.17	0.572	4.58123e-30	oocyte	POGZ-E
3.84954e-33	-0.477564	0.22	0.627	5.33161e-30	oogonia_meiosis	ZNF394-E
3.88912e-33	-0.862071	0.22	0.629	5.38643e-30	oocyte	TFE3-E
3.98373e-33	-0.72254	0.2	0.621	5.51747e-30	oocyte	KDM5A-D
4.31547e-33	-0.863074	0.195	0.583	5.97693e-30	oocyte	ZNF362-E
4.49753e-33	0.811288	0.81	0.492	6.22908e-30	oogonia_STRA8	ZNF580-E
4.49767e-33	-0.709233	0.19	0.581	6.22927e-30	oocyte	ZNF687-E
4.53026e-33	-0.536031	0.195	0.509	6.27441e-30	oogonia_meiosis	ZFHX3-E
4.69216e-33	0.680706	0.855	0.484	6.49864e-30	PGC	PAX6-B
4.82513e-33	-0.68815	0.2	0.537	6.6828e-30	oogonia_meiosis	ZNF577-E
5.08949e-33	-0.7675	0.165	0.522	7.04895e-30	oocyte	ZNF549-E
5.63549e-33	0.71572	0.815	0.474	7.80516e-30	PGC_mitotic	NONO-C
5.71009e-33	-1.26343	0.065	0.467	7.90847e-30	pre-spermatogonia	ZNF726-E
5.80541e-33	-0.760495	0.135	0.512	8.04049e-30	oogonia_meiosis	ZNF512B-E
5.83138e-33	-0.949673	0.145	0.505	8.07646e-30	oogonia_meiosis	MAX-C
6.01853e-33	0.637838	0.865	0.462	8.33566e-30	PGC_mitotic	CEBPD-A
6.03642e-33	0.857658	0.795	0.428	8.36045e-30	PGC	HIF1A-AA
6.20903e-33	-0.611292	0.18	0.613	8.59951e-30	oogonia_meiosis	ZNF3-E
6.24219e-33	-0.598793	0.17	0.542	8.64543e-30	oocyte	ZSCAN25-E
6.27839e-33	0.945076	0.78	0.458	8.69557e-30	oogonia_STRA8	HSF4-E
6.93168e-33	-0.677867	0.225	0.525	9.60038e-30	oogonia_meiosis	BSX-E
6.93168e-33	-0.677867	0.225	0.525	9.60038e-30	oogonia_meiosis	RAX2-E
7.06114e-33	-0.629133	0.235	0.61	9.77967e-30	oocyte	ZNF267-E
7.36223e-33	-0.690171	0.22	0.522	1.01967e-29	oogonia_meiosis	LHX9-E
7.70661e-33	0.890418	0.78	0.401	1.06737e-29	PGC	EPAS1-B
9.16505e-33	-0.389689	0.19	0.559	1.26936e-29	oocyte	ZNF841-E
9.36663e-33	-0.599224	0.23	0.608	1.29728e-29	oocyte	ZNF287-E
9.88122e-33	0.601901	0.89	0.479	1.36855e-29	oogonia_STRA8	HOXC11-D
1.10853e-32	-0.688717	0.185	0.546	1.53532e-29	oogonia_meiosis	PBX1-E
1.2355e-32	-0.582863	0.24	0.584	1.71116e-29	oogonia_meiosis	SMARCA1-E
1.28894e-32	-0.80676	0.18	0.557	1.78518e-29	oocyte	ZNF574-E
1.37762e-32	-0.562838	0.21	0.603	1.908e-29	oocyte	ZNF131-E
1.58709e-32	-0.968549	0.195	0.515	2.19812e-29	PGC_mitotic	ZNF202-E
1.60429e-32	1.05301	0.77	0.407	2.22194e-29	pre-spermatogonia	MEF2B-C
1.65337e-32	-0.753854	0.205	0.536	2.28992e-29	oocyte	ZNF433-E
1.70807e-32	-0.850389	0.195	0.572	2.36567e-29	oocyte	SOX4-E
1.75344e-32	0.773149	0.83	0.478	2.42852e-29	PGC_mitotic	ELF4-E
2.22126e-32	-0.729322	0.225	0.568	3.07645e-29	oogonia_STRA8	GRHL3-E
2.28315e-32	-0.863702	0.15	0.547	3.16216e-29	oogonia_meiosis	NR2F1-B
2.40234e-32	-0.735464	0.22	0.562	3.32724e-29	oogonia_meiosis	ZNF586-E
2.67845e-32	0.871244	0.77	0.382	3.70966e-29	PGC_mitotic	NR1H2-B
2.70617e-32	-0.367019	0.185	0.563	3.74804e-29	oocyte	ZNF333-E
2.70904e-32	-0.494034	0.195	0.608	3.75201e-29	oogonia_meiosis	ZBTB24-E
2.73735e-32	0.921991	0.79	0.398	3.79123e-29	oogonia_STRA8	RFX4-E
2.79737e-32	-0.934914	0.185	0.606	3.87435e-29	oocyte	KLF16-E
2.86619e-32	0.728737	0.83	0.478	3.96968e-29	PGC_mitotic	FOXK1-D
2.94819e-32	0.731838	0.81	0.464	4.08324e-29	oocyte	ZNF92-D
3.13305e-32	-0.45704	0.26	0.638	4.33927e-29	oogonia_meiosis	ZBTB2-E
3.27613e-32	-0.637783	0.24	0.638	4.53744e-29	oocyte	ZFP42-E
3.37215e-32	-0.369434	0.18	0.562	4.67043e-29	oocyte	CREBZF-E
3.39684e-32	0.642182	0.855	0.49	4.70462e-29	PGC	NR5A2-B
3.52888e-32	-0.661152	0.2	0.578	4.8875e-29	oocyte	ZNF778-E
3.59103e-32	-0.604601	0.215	0.568	4.97358e-29	oogonia_meiosis	ZNF275-E
3.71972e-32	-0.611384	0.23	0.626	5.15181e-29	oocyte	ZNF394-E
3.74001e-32	0.853976	0.835	0.478	5.17991e-29	pre-spermatogonia	BNC2-E
4.04394e-32	-0.826939	0.18	0.539	5.60086e-29	oogonia_meiosis	FOXK2-C
4.16627e-32	0.677178	0.825	0.505	5.77028e-29	PGC_mitotic	ZNF195-E
4.28332e-32	-0.356832	0.2	0.563	5.9324e-29	oogonia_meiosis	ZNF134-E
4.49727e-32	0.681792	0.82	0.458	6.22871e-29	oogonia_meiosis	MTA3-C
4.97863e-32	0.984817	0.785	0.463	6.8954e-29	pre-spermatogonia	PRRX1-E
4.98698e-32	-0.692886	0.23	0.638	6.90697e-29	oocyte	KAT5-E
5.03568e-32	-0.622902	0.22	0.602	6.97442e-29	oocyte	ZBTB21-E
5.1101e-32	-0.705714	0.26	0.606	7.07748e-29	pre-spermatogonia	ZNF382-B
5.21804e-32	0.691908	0.845	0.496	7.22699e-29	PGC_mitotic	KLF16-E
5.33564e-32	-0.714339	0.205	0.558	7.38986e-29	oogonia_meiosis	MSX2-E
5.38615e-32	-0.921421	0.2	0.626	7.45982e-29	oogonia_STRA8	TSHZ3-E
5.38993e-32	-1.24063	0.08	0.504	7.46506e-29	oocyte	STAT4-B
5.42221e-32	-0.934732	0.195	0.644	7.50975e-29	oocyte	NFKBIL1-E
5.65665e-32	0.641605	0.825	0.382	7.83445e-29	oocyte	DMRTB1-E
5.88777e-32	0.799902	0.815	0.424	8.15456e-29	PGC_mitotic	HIF1A-AA
6.3734e-32	-0.565921	0.21	0.561	8.82717e-29	oocyte	ZNF557-E
6.76375e-32	0.768652	0.8	0.462	9.36779e-29	PGC_mitotic	ZBTB39-E
6.89739e-32	0.797703	0.805	0.438	9.55289e-29	PGC_mitotic	ZNF823-E
6.89964e-32	0.698958	0.82	0.389	9.556e-29	oocyte	TCF25-C
7.028e-32	-0.390272	0.205	0.615	9.73378e-29	oocyte	ZNF683-E
7.07479e-32	-0.635763	0.22	0.596	9.79858e-29	oocyte	ZNF562-E
7.35023e-32	-0.853998	0.175	0.522	1.01801e-28	oocyte	ZNF682-E
7.61548e-32	0.575157	0.865	0.479	1.05474e-28	oogonia_meiosis	BCL6-B
9.13843e-32	-0.714547	0.205	0.555	1.26567e-28	oogonia_meiosis	PITX3-E
9.15376e-32	0.623507	0.855	0.529	1.2678e-28	PGC_mitotic	GMEB1-E
1.00088e-31	-0.476621	0.215	0.598	1.38623e-28	oogonia_meiosis	ZNF449-E
1.00132e-31	0.868056	0.78	0.434	1.38683e-28	oogonia_STRA8	DMAP1-E
1.0312e-31	-1.12246	0.165	0.492	1.42821e-28	oocyte	E2F4-AA
1.12054e-31	-0.521835	0.22	0.613	1.55195e-28	oogonia_meiosis	ZNF683-E
1.1232e-31	-0.424384	0.2	0.593	1.55564e-28	oogonia_meiosis	ZBTB6-E
1.16536e-31	-0.79019	0.185	0.512	1.61402e-28	oocyte	ZNF773-E
1.20592e-31	-0.567815	0.21	0.595	1.6702e-28	oocyte	ZNF669-E
1.22907e-31	0.957406	0.785	0.405	1.70226e-28	PGC_mitotic	HIVEP3-E
1.26452e-31	-0.793001	0.17	0.529	1.75135e-28	oocyte	ZNF276-E
1.40408e-31	-0.639105	0.195	0.572	1.94465e-28	oocyte	ZNF275-E
1.46891e-31	0.894575	0.765	0.38	2.03444e-28	oogonia_meiosis	ETV3-E
1.54544e-31	0.842509	0.76	0.443	2.14044e-28	oogonia_STRA8	ZNF577-E
1.58632e-31	-0.377607	0.205	0.647	2.19706e-28	oocyte	ZC3H6-E
1.59832e-31	-0.89489	0.22	0.564	2.21367e-28	oogonia_meiosis	ZNF215-E
1.88624e-31	-0.539778	0.235	0.583	2.61244e-28	oogonia_meiosis	DLX2-E
1.92322e-31	-0.639674	0.245	0.638	2.66366e-28	oocyte	TFAM-E
1.93331e-31	-0.6191	0.22	0.537	2.67763e-28	oocyte	ZNF565-E
2.06849e-31	-1.01405	0.13	0.513	2.86485e-28	oocyte	TBX6-E
2.16611e-31	-0.683899	0.175	0.543	3.00006e-28	oocyte	ZNF124-E
2.18419e-31	-0.916988	0.205	0.56	3.02511e-28	oogonia_STRA8	PRRX1-E
2.25517e-31	-1.05007	0.165	0.486	3.12341e-28	PGC_mitotic	ZNF281-E
2.2638e-31	0.66232	0.82	0.384	3.13536e-28	oocyte	DMRTC2-E
2.27746e-31	1.06353	0.765	0.4	3.15428e-28	pre-spermatogonia	RORB-E
2.33085e-31	-0.902944	0.15	0.497	3.22823e-28	oogonia_meiosis	ZNF696-E
2.35243e-31	-0.380518	0.195	0.566	3.25812e-28	oocyte	ZNF141-E
2.35832e-31	0.810993	0.785	0.414	3.26628e-28	PGC	NEUROD1-C
2.45999e-31	-0.974826	0.18	0.539	3.40709e-28	oogonia_meiosis	GFI1B-C
2.50443e-31	-0.602984	0.25	0.642	3.46863e-28	oocyte	PRDM4-E
2.5505e-31	-1.17965	0.19	0.501	3.53244e-28	PGC	ZNF660-E
2.75708e-31	0.655518	0.83	0.451	3.81856e-28	oocyte	MEOX2-E
2.84254e-31	-0.496893	0.21	0.556	3.93691e-28	oogonia_meiosis	GABPA-C
3.0079e-31	0.748401	0.79	0.422	4.16594e-28	oocyte	ZBED6-E
3.04535e-31	-0.361492	0.235	0.623	4.21781e-28	oogonia_meiosis	ZNF800-E
3.1353e-31	-0.488828	0.235	0.581	4.34239e-28	oogonia_meiosis	TEF-E
3.52405e-31	0.94163	0.78	0.442	4.88081e-28	oogonia_STRA8	ZNF444-E
3.72135e-31	0.77409	0.8	0.418	5.15407e-28	PGC	KLF4-A
3.79003e-31	1.06484	0.775	0.394	5.24919e-28	pre-spermatogonia	MEIS1-C
3.79713e-31	-0.711989	0.175	0.539	5.25903e-28	oocyte	ZNF544-E
3.9127e-31	-0.534662	0.22	0.593	5.41909e-28	oogonia_meiosis	ZNF669-E
3.9604e-31	0.875771	0.81	0.453	5.48516e-28	oogonia_STRA8	ZNF205-E
3.96063e-31	0.844094	0.805	0.432	5.48548e-28	FGC_mitotic	NFYB-B
4.12886e-31	-0.996037	0.16	0.538	5.71847e-28	oogonia_meiosis	EGR1-AA
4.28486e-31	0.524014	0.875	0.629	5.93453e-28	oogonia_meiosis	NR1H4-A
4.90604e-31	-0.259686	0.205	0.578	6.79486e-28	oocyte	ZBED5-E
5.47722e-31	0.786002	0.785	0.38	7.58596e-28	oocyte	NKX2-2-E
5.68437e-31	-0.471357	0.225	0.623	7.87286e-28	oogonia_meiosis	ZNF561-E
5.70617e-31	-0.947109	0.15	0.542	7.90305e-28	oogonia_meiosis	TEAD2-C
6.0919e-31	0.671366	0.875	0.52	8.43728e-28	PGC_mitotic	TFE3-E
6.27073e-31	0.993242	0.77	0.421	8.68497e-28	PGC_mitotic	ZNF296-E
6.60249e-31	-0.347033	0.225	0.613	9.14446e-28	oogonia_meiosis	ZNF664-E
6.80103e-31	-0.290342	0.205	0.576	9.41942e-28	oocyte	ZNF529-E
6.90513e-31	-0.796651	0.235	0.657	9.56361e-28	oocyte	GTF3A-E
7.71472e-31	-0.866186	0.215	0.581	1.06849e-27	oogonia_meiosis	FOXK1-D
8.43714e-31	-1.09145	0.165	0.525	1.16854e-27	oogonia_meiosis	JUNB-C
8.79528e-31	-0.859959	0.21	0.558	1.21815e-27	oogonia_meiosis	RARG-D
8.85867e-31	0.85444	0.785	0.434	1.22693e-27	oogonia_STRA8	ZBTB48-E
8.92171e-31	-0.495458	0.205	0.563	1.23566e-27	oogonia_meiosis	ZNF18-E
9.43932e-31	-0.637777	0.175	0.528	1.30735e-27	oogonia_meiosis	ZNF276-E
9.56166e-31	-0.463635	0.19	0.568	1.32429e-27	oogonia_meiosis	ZNF496-E
9.88209e-31	-0.702014	0.225	0.608	1.36867e-27	oocyte	SP8-E
1.01273e-30	-0.319193	0.24	0.616	1.40263e-27	oogonia_meiosis	ELF2-E
1.02389e-30	-0.638533	0.225	0.593	1.41809e-27	oogonia_meiosis	KMT2B-D
1.03111e-30	0.616649	0.86	0.513	1.42808e-27	PGC_mitotic	MTF1-E
1.0961e-30	-0.89157	0.22	0.562	1.51809e-27	oogonia_STRA8	RUNX2-A
1.10904e-30	0.763782	0.8	0.379	1.53602e-27	oocyte	NEUROD6-E
1.11926e-30	-1.00872	0.185	0.532	1.55017e-27	oogonia_meiosis	BACH2-C
1.20671e-30	0.691559	0.82	0.484	1.6713e-27	PGC_mitotic	ZNF317-E
1.22357e-30	-0.512519	0.19	0.568	1.69465e-27	oogonia_meiosis	ZNF691-E
1.30553e-30	-1.13957	0.18	0.5	1.80816e-27	PGC_mitotic	ZNF334-E
1.31128e-30	-0.650037	0.26	0.659	1.81612e-27	oocyte	TOX4-E
1.37975e-30	0.730202	0.77	0.436	1.91096e-27	PGC_mitotic	ZNF442-E
1.38059e-30	-0.685577	0.17	0.522	1.91212e-27	oogonia_meiosis	ZNF320-E
1.41993e-30	-0.398662	0.195	0.593	1.9666e-27	oocyte	ZNF655-E
1.45986e-30	-0.731627	0.22	0.612	2.02191e-27	oocyte	DBP-E
1.51314e-30	-0.625858	0.21	0.601	2.0957e-27	oocyte	ZFP64-E
1.58915e-30	0.749762	0.81	0.487	2.20097e-27	PGC_mitotic	ZNF749-E
1.61382e-30	-0.697482	0.23	0.603	2.23515e-27	oocyte	TBX19-E
1.77965e-30	-0.579845	0.165	0.532	2.46482e-27	oocyte	ZNF785-E
1.81175e-30	-0.966721	0.225	0.573	2.50928e-27	pre-spermatogonia	NR4A3-B
2.02093e-30	-0.879765	0.195	0.589	2.79899e-27	oogonia_STRA8	MYCL-E
2.10832e-30	-0.799192	0.25	0.636	2.92002e-27	oocyte	NFKBIB-E
2.18861e-30	-0.623704	0.175	0.524	3.03122e-27	oogonia_meiosis	ZC3H4-E
2.29326e-30	0.910109	0.745	0.411	3.17616e-27	PGC_mitotic	TCF7-B
2.40238e-30	0.468854	0.91	0.56	3.3273e-27	PGC_mitotic	DNAJC1-E
2.63221e-30	-0.499132	0.225	0.608	3.64561e-27	oogonia_meiosis	ZNF287-E
2.91651e-30	0.875504	0.735	0.391	4.03937e-27	oogonia_STRA8	ZNF599-E
2.92545e-30	-0.425573	0.2	0.599	4.05175e-27	oogonia_meiosis	ZNF562-E
3.05534e-30	0.6611	0.815	0.463	4.23165e-27	oogonia_meiosis	IRF1-AA
3.14603e-30	0.960407	0.755	0.422	4.35725e-27	pre-spermatogonia	SOX8-E
3.24846e-30	0.768535	0.81	0.441	4.49912e-27	oocyte	OLIG1-E
3.31905e-30	-0.432351	0.15	0.51	4.59689e-27	oocyte	ZNF789-E
3.33433e-30	-0.778901	0.185	0.555	4.61805e-27	oocyte	ZNF718-E
3.38176e-30	0.924911	0.745	0.411	4.68374e-27	oogonia_STRA8	TBX6-E
3.85045e-30	-1.23005	0.11	0.5	5.33287e-27	oogonia_meiosis	MTA2-C
3.85289e-30	-0.648693	0.2	0.53	5.33626e-27	oogonia_meiosis	POU4F1-E
4.15872e-30	0.779609	0.78	0.398	5.75982e-27	oocyte	FOXN1-E
4.31165e-30	-0.643965	0.255	0.668	5.97163e-27	oocyte	ZNF277-E
4.35391e-30	-1.00966	0.175	0.519	6.03017e-27	oogonia_STRA8	NKX3-1-D
4.58871e-30	-0.439693	0.14	0.511	6.35537e-27	oocyte	ZNF211-E
5.08845e-30	-0.374704	0.205	0.538	7.0475e-27	oogonia_meiosis	ZNF264-E
5.28402e-30	-0.772201	0.195	0.534	7.31837e-27	oogonia_meiosis	EGR4-E
5.40945e-30	-0.922755	0.24	0.526	7.49208e-27	PGC_mitotic	TOX-E
5.43141e-30	-1.16364	0.17	0.5	7.5225e-27	oogonia_meiosis	CTCFL-C
5.64866e-30	-0.820512	0.215	0.536	7.82339e-27	oogonia_meiosis	ZSCAN31-E
5.66493e-30	-0.99584	0.16	0.538	7.84592e-27	oocyte	NR2C2-B
6.07762e-30	0.758862	0.8	0.47	8.41751e-27	PGC_mitotic	ZNF48-E
6.08521e-30	-0.338018	0.25	0.625	8.42802e-27	oogonia_meiosis	ZFP91-E
6.11706e-30	-0.352687	0.23	0.558	8.47213e-27	oocyte	ZNF200-E
6.50918e-30	-0.979957	0.17	0.548	9.01521e-27	PGC_mitotic	FOXN4-E
6.71032e-30	1.1199	0.73	0.387	9.29379e-27	PGC_mitotic	ZNF710-E
7.21936e-30	0.745146	0.805	0.484	9.99881e-27	oogonia_STRA8	ZNF414-E
7.42336e-30	0.842793	0.725	0.369	1.02814e-26	oogonia_STRA8	ZNF135-E
7.64455e-30	-1.2387	0.115	0.477	1.05877e-26	oogonia_meiosis	FOXM1-B
8.16815e-30	0.80734	0.795	0.456	1.13129e-26	PGC_mitotic	ZBED1-C
8.70161e-30	-0.693429	0.2	0.563	1.20517e-26	oocyte	ZNF692-E
9.02393e-30	0.57732	0.84	0.514	1.24981e-26	oocyte	ZNF93-E
9.95796e-30	-0.642563	0.24	0.568	1.37918e-26	oogonia_meiosis	ZFX-C
9.95809e-30	0.694229	0.805	0.438	1.3792e-26	FGC_mitotic	ZSCAN31-E
1.02002e-29	-0.655943	0.22	0.583	1.41273e-26	oocyte	TEF-E
1.21786e-29	0.765632	0.775	0.5	1.68674e-26	oogonia_STRA8	ZNF771-E
1.25198e-29	0.960421	0.81	0.474	1.734e-26	oocyte	NFATC2-B
1.27571e-29	-0.478724	0.19	0.585	1.76685e-26	oogonia_meiosis	ZSCAN16-E
1.29064e-29	0.785829	0.785	0.479	1.78753e-26	oogonia_STRA8	NR4A3-B
1.35454e-29	-0.596161	0.185	0.522	1.87603e-26	oogonia_meiosis	ZNF418-E
1.46057e-29	-0.652741	0.265	0.593	2.02289e-26	PGC	ELF3-B
1.49368e-29	-0.187379	0.22	0.578	2.06874e-26	oogonia_meiosis	ZNF518B-E
1.59899e-29	-0.407342	0.23	0.627	2.2146e-26	oogonia_meiosis	SMARCE1-E
1.61756e-29	0.855597	0.8	0.467	2.24032e-26	oogonia_STRA8	ZNF775-E
1.72651e-29	-1.18688	0.11	0.459	2.39122e-26	oocyte	ZNF726-E
1.75837e-29	-0.960773	0.18	0.512	2.43534e-26	FGC_mitotic	SOHLH1-E
1.93265e-29	-0.987926	0.225	0.534	2.67672e-26	PGC	POU4F2-C
2.41159e-29	-1.05743	0.17	0.537	3.34005e-26	oocyte	E2F5-C
2.69564e-29	-0.962163	0.205	0.498	3.73346e-26	oogonia_STRA8	MAFB-C
2.82596e-29	-0.42098	0.215	0.553	3.91396e-26	oogonia_meiosis	ZXDB-E
2.85522e-29	-0.274827	0.235	0.601	3.95448e-26	oogonia_meiosis	PBRM1-E
2.90007e-29	-0.854736	0.215	0.597	4.01659e-26	oogonia_STRA8	NR5A2-B
3.05769e-29	-0.507188	0.23	0.611	4.2349e-26	oogonia_meiosis	ZNF267-E
3.18384e-29	-0.512092	0.245	0.612	4.40962e-26	oocyte	THAP10-E
3.34611e-29	-0.900358	0.155	0.537	4.63436e-26	oogonia_meiosis	ZNF490-E
3.36264e-29	0.779606	0.78	0.414	4.65726e-26	oocyte	THAP11-C
3.57663e-29	0.719619	0.78	0.418	4.95363e-26	PGC_mitotic	TP53-AA
3.72216e-29	0.744901	0.78	0.442	5.15519e-26	PGC_mitotic	ZNF124-E
3.85682e-29	-0.279002	0.19	0.572	5.34169e-26	oocyte	ZNF721-E
4.02484e-29	-0.768246	0.26	0.564	5.5744e-26	oogonia_STRA8	IRX5-E
4.08581e-29	-1.07844	0.12	0.488	5.65884e-26	oocyte	NR0B1-B
4.39918e-29	-0.456586	0.23	0.552	6.09287e-26	oogonia_meiosis	ZNF384-C
4.83966e-29	-1.06962	0.135	0.562	6.70292e-26	PGC_mitotic	SOX30-E
4.96474e-29	-0.931989	0.165	0.532	6.87617e-26	oogonia_STRA8	CEBPE-C
5.25753e-29	-0.929984	0.165	0.513	7.28168e-26	oogonia_meiosis	MEIS2-C
5.29475e-29	-0.355267	0.235	0.592	7.33323e-26	oocyte	ZNF28-E
5.30138e-29	0.664266	0.835	0.492	7.34241e-26	PGC_mitotic	KMT2B-D
5.49843e-29	-1.08442	0.14	0.485	7.61533e-26	oogonia_meiosis	NR0B1-B
5.59936e-29	0.806139	0.775	0.509	7.75512e-26	PGC	SMAD7-B
5.66161e-29	0.856014	0.745	0.371	7.84133e-26	oogonia_meiosis	ZNF649-E
5.78371e-29	0.731376	0.79	0.452	8.01044e-26	oocyte	IRX4-E
6.29715e-29	-0.860109	0.225	0.609	8.72155e-26	oogonia_STRA8	SOX7-E
6.64587e-29	-0.320828	0.185	0.532	9.20453e-26	oocyte	ZNF75A-E
6.68012e-29	-0.219953	0.185	0.583	9.25197e-26	oocyte	ZNF33B-E
6.81258e-29	-0.495927	0.205	0.613	9.43542e-26	oogonia_meiosis	ZNF761-E
7.10989e-29	-0.62509	0.23	0.578	9.8472e-26	oogonia_meiosis	HOXA2-E
7.23486e-29	0.859033	0.77	0.391	1.00203e-25	oogonia_meiosis	GATAD2B-E
7.26906e-29	1.05593	0.735	0.408	1.00677e-25	PGC_mitotic	EPAS1-B
7.85211e-29	1.04654	0.765	0.474	1.08752e-25	PGC_mitotic	ZNF792-E
7.96619e-29	0.649727	0.745	0.435	1.10332e-25	PGC_mitotic	CEBPE-C
8.27463e-29	-0.20414	0.185	0.548	1.14604e-25	oocyte	ZNF345-E
8.54206e-29	0.605303	0.865	0.503	1.18308e-25	PGC_mitotic	ZNF761-E
8.60535e-29	0.877216	0.715	0.403	1.19184e-25	FGC_mitotic	HOXA6-E
8.79659e-29	-0.612762	0.22	0.612	1.21833e-25	oocyte	TADA2B-E
9.56856e-29	-0.887369	0.205	0.52	1.32524e-25	oogonia_meiosis	POU5F1B-E
9.5916e-29	-0.371755	0.24	0.611	1.32844e-25	oogonia_meiosis	ZFP1-E
9.69118e-29	-1.30259	0.155	0.449	1.34223e-25	PGC_mitotic	ZNF19-E
9.91184e-29	0.721748	0.805	0.408	1.37279e-25	oocyte	SOHLH1-E
1.0223e-28	-1.19943	0.155	0.493	1.41588e-25	pre-spermatogonia	FIGLA-B
1.11436e-28	0.840603	0.785	0.44	1.54338e-25	PGC	SNAI2-B
1.11457e-28	-0.628473	0.2	0.542	1.54368e-25	oocyte	ZSCAN22-E
1.20043e-28	-0.715973	0.22	0.549	1.66259e-25	oogonia_STRA8	TOX3-E
1.20081e-28	-0.424223	0.19	0.564	1.66312e-25	oogonia_meiosis	ZBTB39-E
1.22568e-28	-0.664501	0.22	0.603	1.69757e-25	oocyte	ZSCAN5A-E
1.23249e-28	0.626885	0.835	0.442	1.707e-25	PGC_mitotic	NFE2L3-E
1.3821e-28	-1.03476	0.105	0.556	1.91421e-25	oocyte	PRRX2-E
1.38642e-28	0.760058	0.775	0.434	1.9202e-25	oocyte	ZBED2-E
1.44356e-28	0.624053	0.83	0.492	1.99933e-25	PGC_mitotic	ZNF669-E
1.44512e-28	0.771248	0.765	0.386	2.00149e-25	oocyte	ZNF281-E
1.5256e-28	-0.466044	0.21	0.541	2.11296e-25	oogonia_meiosis	KDM5C-E
1.65772e-28	0.674046	0.805	0.442	2.29595e-25	PGC_mitotic	RELA-AA
1.70939e-28	-0.595706	0.21	0.541	2.3675e-25	oocyte	ZNF554-E
1.71052e-28	0.704664	0.8	0.438	2.36907e-25	oocyte	SOX21-E
1.80315e-28	0.909221	0.725	0.402	2.49737e-25	oogonia_STRA8	HOXA3-E
1.89181e-28	-0.615064	0.22	0.62	2.62016e-25	oocyte	MTF1-E
1.9157e-28	-1.41832	0.1	0.446	2.65324e-25	PGC_mitotic	ZNF487-E
2.02767e-28	0.662641	0.795	0.39	2.80832e-25	oocyte	TLX1-E
2.11504e-28	-0.431529	0.215	0.58	2.92933e-25	oogonia_meiosis	ZBTB14-E
2.13254e-28	-0.56298	0.215	0.581	2.95357e-25	oocyte	GSC-E
2.19878e-28	0.7562	0.795	0.418	3.04531e-25	oogonia_meiosis	BHLHE41-E
2.22922e-28	-0.990624	0.185	0.522	3.08746e-25	oogonia_meiosis	ETV1-C
2.25392e-28	-0.647131	0.23	0.525	3.12168e-25	oogonia_STRA8	ZBED2-E
2.27037e-28	0.727085	0.805	0.471	3.14446e-25	oocyte	ZNF431-E
2.31548e-28	-0.761482	0.24	0.559	3.20694e-25	oogonia_STRA8	ZNF366-E
2.43971e-28	-0.54526	0.2	0.567	3.37899e-25	oogonia_meiosis	TCF23-E
2.52173e-28	0.789531	0.78	0.438	3.4926e-25	oogonia_STRA8	ZGLP1-E
2.53875e-28	0.600116	0.75	0.371	3.51616e-25	FGC_mitotic	FOXM1-B
2.56514e-28	-0.541569	0.195	0.532	3.55272e-25	oogonia_meiosis	DMAP1-E
2.684e-28	-0.570836	0.21	0.531	3.71734e-25	oogonia_meiosis	BARX1-E
2.89103e-28	-0.390417	0.22	0.573	4.00408e-25	oocyte	NFXL1-E
2.99357e-28	0.889871	0.75	0.412	4.1461e-25	PGC_mitotic	GLIS2-E
3.04626e-28	-0.597286	0.22	0.56	4.21907e-25	oogonia_meiosis	ZNF530-E
3.35366e-28	-0.664576	0.255	0.648	4.64482e-25	oocyte	MLX-E
3.3823e-28	-0.770409	0.26	0.583	4.68449e-25	oogonia_STRA8	SP6-E
3.54043e-28	-0.747319	0.24	0.587	4.9035e-25	oogonia_STRA8	ETV4-A
3.63831e-28	0.727159	0.805	0.462	5.03906e-25	PGC_mitotic	ZNF557-E
3.73304e-28	0.691886	0.82	0.52	5.17025e-25	oogonia_STRA8	ZNF511-E
3.89534e-28	0.725057	0.78	0.442	5.39504e-25	oogonia_meiosis	DMBX1-E
3.9253e-28	0.563758	0.83	0.413	5.43653e-25	oogonia_meiosis	NR5A1-AA
4.10493e-28	0.808578	0.765	0.392	5.68533e-25	oocyte	GATAD2B-E
4.23982e-28	0.480621	0.88	0.53	5.87214e-25	PGC_mitotic	NFKBIL1-E
4.37957e-28	-0.441724	0.225	0.553	6.0657e-25	oogonia_meiosis	HOXC9-E
4.51935e-28	-0.480404	0.21	0.58	6.25929e-25	oocyte	ZNF398-E
4.7834e-28	-0.60404	0.22	0.593	6.62501e-25	oocyte	TFEB-E
5.03384e-28	-0.625352	0.195	0.573	6.97186e-25	oocyte	ZNF526-E
5.6105e-28	0.736517	0.795	0.418	7.77055e-25	PGC_mitotic	ZNF682-E
5.63881e-28	-0.630052	0.195	0.557	7.80975e-25	oogonia_meiosis	ZNF547-E
5.71652e-28	-0.549645	0.185	0.545	7.91738e-25	oocyte	KDM5C-E
5.98615e-28	-0.881272	0.255	0.537	8.29082e-25	PGC_mitotic	ZNF541-E
6.05256e-28	0.764706	0.785	0.415	8.3828e-25	oogonia_meiosis	MYT1-E
6.1593e-28	0.611088	0.815	0.501	8.53064e-25	PGC_mitotic	ZNF672-E
6.35862e-28	-0.959245	0.235	0.529	8.80669e-25	PGC	HSF1-B
6.48429e-28	-0.128099	0.21	0.564	8.98074e-25	oocyte	ZNF512-E
6.88421e-28	-0.847023	0.17	0.526	9.53463e-25	oogonia_meiosis	TBX4-E
7.13833e-28	-0.429833	0.215	0.601	9.88658e-25	oogonia_meiosis	SFPQ-E
7.18527e-28	0.689015	0.805	0.505	9.9516e-25	oogonia_STRA8	THAP8-E
7.35583e-28	-0.903057	0.2	0.558	1.01878e-24	PGC	POU3F4-E
8.13299e-28	0.828303	0.785	0.391	1.12642e-24	pre-spermatogonia	PEG3-E
8.73249e-28	0.726412	0.78	0.415	1.20945e-24	oocyte	SPI1-AA
9.16029e-28	-0.68599	0.195	0.537	1.2687e-24	oocyte	ZNF652-E
9.46899e-28	0.718074	0.75	0.428	1.31146e-24	oocyte	EBF3-E
1.01819e-27	-1.07889	0.16	0.507	1.41019e-24	oogonia_meiosis	ZNF552-E
1.04214e-27	0.884328	0.735	0.408	1.44337e-24	FGC_mitotic	USF1-AA
1.07012e-27	0.706348	0.81	0.479	1.48212e-24	PGC_mitotic	ZBTB42-E
1.10596e-27	0.546965	0.82	0.515	1.53176e-24	oogonia_meiosis	MNT-C
1.20998e-27	-0.997671	0.15	0.476	1.67582e-24	FGC_mitotic	FOXN3-E
1.22848e-27	-0.78724	0.18	0.537	1.70145e-24	oogonia_meiosis	SNAPC4-C
1.39788e-27	-0.493313	0.24	0.592	1.93606e-24	oocyte	PHTF1-E
1.40843e-27	-0.373073	0.225	0.586	1.95067e-24	oogonia_meiosis	ZNF845-E
1.45727e-27	-0.403251	0.205	0.562	2.01832e-24	oogonia_meiosis	ZNF680-E
1.46074e-27	-0.418247	0.25	0.595	2.02312e-24	oogonia_meiosis	SP100-E
1.47344e-27	-0.879098	0.24	0.544	2.04071e-24	FGC_mitotic	HES5-E
1.47488e-27	0.797603	0.765	0.436	2.04271e-24	oogonia_meiosis	ZBED2-E
1.50064e-27	-0.821664	0.24	0.559	2.07838e-24	PGC_mitotic	MXD1-E
1.51318e-27	-0.389526	0.26	0.635	2.09576e-24	oocyte	TBPL1-E
1.69921e-27	-1.01666	0.165	0.474	2.3534e-24	FGC_mitotic	DMRT1-E
1.72141e-27	-1.11523	0.1	0.571	2.38415e-24	oocyte	NFKBIE-E
1.74716e-27	0.769572	0.78	0.4	2.41981e-24	oocyte	ZNF536-E
1.80243e-27	0.603367	0.855	0.445	2.49636e-24	PGC	NFKBIE-E
1.8554e-27	-0.828988	0.165	0.515	2.56972e-24	oocyte	ZNF69-E
1.96767e-27	-0.548323	0.215	0.587	2.72523e-24	oocyte	ZNF407-E
2.00948e-27	-0.864507	0.215	0.522	2.78313e-24	pre-spermatogonia	SP3-AA
2.11422e-27	-0.736209	0.17	0.514	2.92819e-24	oogonia_meiosis	ZNF644-D
2.15058e-27	-1.10021	0.105	0.515	2.97856e-24	oocyte	SATB1-B
2.15068e-27	-1.04922	0.14	0.502	2.9787e-24	PGC_mitotic	FOXE1-E
2.26345e-27	-0.720215	0.22	0.567	3.13488e-24	oocyte	ZNF48-E
2.27295e-27	-0.85998	0.25	0.576	3.14803e-24	oogonia_STRA8	BNC2-E
2.33847e-27	0.714815	0.835	0.486	3.23878e-24	PGC	CREB5-A
2.45223e-27	-0.837921	0.2	0.633	3.39634e-24	oogonia_STRA8	ZNF423-E
2.48015e-27	-0.739062	0.245	0.578	3.435e-24	PGC_mitotic	HOXB6-E
2.58669e-27	0.540478	0.855	0.541	3.58257e-24	PGC_mitotic	PRDM4-E
2.59334e-27	0.824908	0.755	0.432	3.59178e-24	pre-spermatogonia	FOXJ2-C
2.62379e-27	0.781088	0.78	0.437	3.63395e-24	PGC_mitotic	ZBTB47-E
2.6242e-27	-0.879941	0.195	0.583	3.63452e-24	oocyte	ELF4-E
2.72128e-27	-0.317245	0.205	0.534	3.76897e-24	oocyte	ZNF799-E
2.78602e-27	0.780401	0.765	0.379	3.85864e-24	oocyte	HNF1A-AA
2.88552e-27	-0.355573	0.195	0.53	3.99644e-24	oogonia_meiosis	ELF1-C
3.10075e-27	-0.345247	0.22	0.619	4.29454e-24	oocyte	ELF2-E
3.11844e-27	-0.985605	0.15	0.452	4.31904e-24	PGC	ZNF726-E
3.16956e-27	1.11608	0.73	0.37	4.38984e-24	PGC_mitotic	ZNF551-E
3.24984e-27	-0.383923	0.215	0.556	4.50103e-24	oocyte	CSRNP2-E
3.2515e-27	-1.03532	0.215	0.486	4.50332e-24	PGC_mitotic	PEG3-E
3.27229e-27	-0.394854	0.22	0.584	4.53212e-24	oogonia_meiosis	ST18-E
3.28806e-27	0.515835	0.87	0.449	4.55397e-24	oogonia_meiosis	HNF1B-C
3.29918e-27	0.773319	0.74	0.41	4.56937e-24	oogonia_STRA8	ZNF311-E
3.32168e-27	0.717208	0.78	0.44	4.60053e-24	PGC_mitotic	ZNF433-E
3.36058e-27	-0.680503	0.18	0.548	4.6544e-24	oocyte	ZNF324-E
3.4022e-27	0.70566	0.84	0.477	4.71205e-24	PGC	JUN-AA
3.63794e-27	-0.73447	0.24	0.558	5.03855e-24	PGC_mitotic	TGIF2-C
3.73437e-27	0.734693	0.775	0.388	5.1721e-24	oocyte	ELK3-E
3.7757e-27	0.865078	0.73	0.421	5.22934e-24	oogonia_STRA8	ZNF69-E
3.78332e-27	0.785845	0.78	0.452	5.23989e-24	PGC_mitotic	MAF-C
4.04447e-27	0.957941	0.745	0.448	5.60159e-24	pre-spermatogonia	FOXC2-E
4.20801e-27	-0.731553	0.245	0.588	5.8281e-24	oogonia_STRA8	HMGA1-B
4.37778e-27	-0.385017	0.23	0.6	6.06322e-24	oogonia_meiosis	ZBTB21-E
4.75596e-27	0.738667	0.75	0.481	6.587e-24	PGC_mitotic	ZNF79-E
5.03534e-27	0.823277	0.73	0.373	6.97395e-24	oocyte	ZNF649-E
5.08818e-27	-0.425584	0.235	0.613	7.04713e-24	oogonia_meiosis	THAP10-E
5.09961e-27	-0.593789	0.23	0.554	7.06295e-24	oogonia_meiosis	FEZF1-E
5.11277e-27	-0.597648	0.16	0.513	7.08119e-24	oogonia_meiosis	KLF8-E
5.13817e-27	-0.327972	0.23	0.595	7.11637e-24	oogonia_meiosis	KAT7-E
5.16485e-27	-0.644861	0.23	0.589	7.15331e-24	oocyte	ZNF784-E
5.31827e-27	-0.560601	0.19	0.546	7.3658e-24	oogonia_meiosis	ZNF212-E
5.65213e-27	0.821192	0.765	0.384	7.82819e-24	oocyte	IKZF3-E
5.70239e-27	-0.318042	0.215	0.579	7.89781e-24	oogonia_meiosis	ZNF398-E
6.17906e-27	-0.625601	0.18	0.514	8.55799e-24	oogonia_meiosis	ZNF816-E
6.31366e-27	-1.08347	0.145	0.512	8.74441e-24	oocyte	EBF4-E
6.57788e-27	0.620076	0.795	0.421	9.11037e-24	oogonia_meiosis	EBF3-E
6.66152e-27	0.720135	0.78	0.502	9.2262e-24	PGC	GATA4-B
7.205e-27	-0.316527	0.195	0.545	9.97892e-24	oocyte	ZNF212-E
7.87228e-27	-0.390363	0.235	0.558	1.09031e-23	oogonia_meiosis	HOXC10-E
7.90514e-27	-0.973953	0.17	0.522	1.09486e-23	oogonia_meiosis	MYOG-E
8.07076e-27	-0.4532	0.195	0.521	1.1178e-23	oogonia_meiosis	ATF7-C
8.11013e-27	-0.958013	0.17	0.525	1.12325e-23	PGC_mitotic	EBF3-E
8.11838e-27	0.637937	0.81	0.497	1.1244e-23	PGC_mitotic	ZNF689-E
8.32145e-27	0.799333	0.8	0.489	1.15252e-23	pre-spermatogonia	FOXF1-E
8.6528e-27	-0.965134	0.16	0.545	1.19841e-23	oocyte	BATF3-E
8.71151e-27	-0.545673	0.175	0.503	1.20654e-23	oocyte	ZNF419-E
8.87359e-27	-0.458911	0.21	0.564	1.22899e-23	oocyte	ZNF496-E
8.93837e-27	-0.800589	0.245	0.547	1.23796e-23	oogonia_meiosis	ZBED1-C
9.08638e-27	-0.853139	0.155	0.509	1.25846e-23	oogonia_meiosis	KDM5B-C
9.57932e-27	-0.254071	0.19	0.512	1.32674e-23	oocyte	ZNF43-E
9.75927e-27	0.53554	0.82	0.511	1.35166e-23	PGC	ZNF469-E
9.96693e-27	0.813296	0.835	0.469	1.38042e-23	oocyte	FOXA2-B
1.01704e-26	-0.252089	0.215	0.564	1.40861e-23	oogonia_meiosis	POGZ-E
1.08536e-26	0.723735	0.765	0.37	1.50322e-23	FGC_mitotic	E2F1-AA
1.13195e-26	0.719296	0.76	0.435	1.56774e-23	oogonia_STRA8	NFIA-D
1.15017e-26	0.598388	0.825	0.445	1.59299e-23	oogonia_meiosis	ZFHX4-E
1.18281e-26	0.617079	0.83	0.517	1.63819e-23	PGC_mitotic	ZNF629-E
1.3165e-26	0.601765	0.815	0.49	1.82336e-23	PGC_mitotic	HOMEZ-E
1.33904e-26	-0.381101	0.24	0.611	1.85458e-23	oocyte	ZNF480-E
1.35388e-26	-0.533281	0.195	0.593	1.87512e-23	oocyte	HOMEZ-E
1.39388e-26	-0.435345	0.26	0.622	1.93052e-23	oocyte	SMARCE1-E
1.44462e-26	0.554243	0.845	0.515	2.0008e-23	PGC_mitotic	ZNF239-E
1.51078e-26	-0.381845	0.215	0.588	2.09243e-23	oocyte	ZNF845-E
1.51687e-26	0.59579	0.82	0.383	2.10086e-23	oogonia_meiosis	NR1I3-D
1.56599e-26	-0.611129	0.185	0.522	2.16889e-23	oogonia_meiosis	ZNF860-E
1.57911e-26	0.672502	0.855	0.503	2.18706e-23	PGC_mitotic	HMGXB3-E
1.59915e-26	-0.635307	0.25	0.585	2.21483e-23	oogonia_STRA8	PAX6-B
1.60478e-26	-0.455693	0.205	0.563	2.22262e-23	oogonia_meiosis	PRDM15-E
1.61272e-26	-0.785379	0.265	0.564	2.23362e-23	oogonia_STRA8	FOXA2-B
1.64411e-26	-0.426356	0.17	0.519	2.27709e-23	oocyte	ZBTB49-E
1.65204e-26	-0.395418	0.245	0.552	2.28807e-23	oogonia_meiosis	GSX1-E
1.69934e-26	0.860436	0.75	0.383	2.35359e-23	oogonia_STRA8	L3MBTL1-E
1.76111e-26	-0.231634	0.215	0.573	2.43914e-23	oogonia_meiosis	ZNF322-E
1.77522e-26	-0.386099	0.205	0.56	2.45869e-23	oocyte	ZNF160-E
1.78452e-26	0.757712	0.805	0.447	2.47156e-23	oocyte	ZNF383-E
1.82173e-26	-0.456235	0.25	0.621	2.5231e-23	oocyte	ZNF800-E
1.88812e-26	-0.959629	0.195	0.568	2.61504e-23	PGC_mitotic	ZFPM2-E
1.91089e-26	-0.650896	0.26	0.589	2.64658e-23	FGC_mitotic	NR5A2-B
1.91813e-26	-0.446877	0.21	0.562	2.65661e-23	oocyte	ZNF76-E
1.94754e-26	0.551607	0.83	0.438	2.69734e-23	oogonia_meiosis	SMAD2-B
2.17829e-26	0.871368	0.745	0.419	3.01694e-23	FGC_mitotic	MYBL2-C
2.23668e-26	-0.879434	0.18	0.522	3.0978e-23	oocyte	PAX1-E
2.239e-26	-0.451167	0.205	0.555	3.10101e-23	oocyte	ZXDB-E
2.37006e-26	0.59932	0.815	0.461	3.28253e-23	PGC_mitotic	CTCF-AA
2.38659e-26	0.480999	0.855	0.526	3.30542e-23	PGC_mitotic	ATF5-E
2.47312e-26	0.588944	0.82	0.451	3.42528e-23	oocyte	MLXIPL-E
2.59552e-26	-0.525702	0.22	0.569	3.5948e-23	oogonia_meiosis	ZNF79-E
2.60512e-26	-0.456867	0.21	0.635	3.60809e-23	oocyte	NFAT5-E
2.62597e-26	-0.662757	0.24	0.558	3.63697e-23	oogonia_meiosis	RHOXF1-E
2.63506e-26	-0.247547	0.205	0.552	3.64955e-23	oocyte	ZNF283-E
2.68227e-26	0.673007	0.78	0.406	3.71494e-23	oocyte	LHX1-E
2.77765e-26	-0.422279	0.235	0.607	3.84704e-23	oogonia_meiosis	THAP2-E
2.88927e-26	-1.04095	0.19	0.516	4.00164e-23	oogonia_STRA8	TP53-AA
3.19959e-26	-0.0569339	0.215	0.584	4.43143e-23	oogonia_meiosis	RC3H2-E
3.27534e-26	-1.01101	0.16	0.492	4.53635e-23	FGC_mitotic	DMRTB1-E
3.61447e-26	-0.588744	0.21	0.553	5.00604e-23	oocyte	DMRTA1-E
3.64578e-26	-0.356287	0.23	0.595	5.04941e-23	oocyte	KAT7-E
4.01132e-26	-0.39871	0.23	0.592	5.55568e-23	oocyte	UBP1-E
4.31359e-26	-0.831311	0.24	0.571	5.97433e-23	PGC_mitotic	MSX1-E
4.39309e-26	-0.630059	0.18	0.526	6.08444e-23	oogonia_meiosis	ZNF500-E
4.44139e-26	0.551579	0.83	0.517	6.15133e-23	FGC_mitotic	MESP1-E
4.82627e-26	-0.536754	0.205	0.554	6.68438e-23	oocyte	SPIC-E
5.01703e-26	0.61426	0.8	0.515	6.94859e-23	PGC	IRF6-E
5.18394e-26	-0.732427	0.265	0.557	7.17976e-23	PGC_mitotic	HOXC4-E
5.5248e-26	0.768793	0.78	0.448	7.65185e-23	oocyte	EBF2-E
5.72215e-26	-0.14582	0.22	0.56	7.92518e-23	oogonia_meiosis	ZBTB43-E
5.84366e-26	-0.502961	0.18	0.524	8.09347e-23	oogonia_meiosis	ZNF316-E
5.96478e-26	0.531391	0.865	0.537	8.26121e-23	PGC_mitotic	ZBTB2-E
6.05272e-26	-0.389477	0.22	0.554	8.38302e-23	oogonia_meiosis	ZNF846-E
6.11678e-26	-0.960665	0.245	0.506	8.47174e-23	PGC_mitotic	HOXD13-E
6.15056e-26	-0.354728	0.235	0.594	8.51852e-23	oocyte	HMGXB4-E
6.17939e-26	-0.489258	0.26	0.571	8.55845e-23	oogonia_meiosis	ZNF670-E
6.32994e-26	-0.542556	0.25	0.545	8.76696e-23	oogonia_meiosis	HMX3-E
6.45645e-26	0.658234	0.825	0.512	8.94219e-23	PGC	SOX2-A
6.82236e-26	0.594157	0.815	0.464	9.44897e-23	oocyte	MXD3-E
6.84542e-26	-0.652785	0.245	0.514	9.48091e-23	oogonia_meiosis	EN1-E
6.94021e-26	-0.754581	0.24	0.568	9.61219e-23	pre-spermatogonia	TSC22D1-E
6.96607e-26	0.817154	0.765	0.444	9.648e-23	pre-spermatogonia	POU4F2-C
7.17697e-26	-0.106745	0.185	0.528	9.94011e-23	oocyte	ZNF45-E
7.95439e-26	-0.738072	0.205	0.517	1.10168e-22	oogonia_meiosis	FOXH1-E
7.98386e-26	0.506313	0.87	0.53	1.10576e-22	PGC	ZNF16-E
8.04955e-26	0.627579	0.8	0.449	1.11486e-22	PGC	MAF-C
8.25665e-26	-0.995033	0.16	0.551	1.14355e-22	oogonia_meiosis	PPARD-A
9.48774e-26	-1.02865	0.145	0.488	1.31405e-22	PGC_mitotic	FEZF2-E
9.61754e-26	-0.300143	0.185	0.519	1.33203e-22	oocyte	ZNF891-E
1.05118e-25	0.504117	0.865	0.534	1.45588e-22	PGC_mitotic	ZFP42-E
1.05597e-25	0.680891	0.78	0.442	1.46252e-22	oogonia_meiosis	ZNF174-E
1.06387e-25	0.861541	0.72	0.412	1.47346e-22	FGC_mitotic	E2F3-A
1.11202e-25	-0.561633	0.17	0.522	1.54015e-22	oocyte	ZNF320-E
1.14163e-25	-0.909604	0.165	0.515	1.58116e-22	oogonia_meiosis	ZNF69-E
1.2063e-25	-0.407056	0.245	0.591	1.67073e-22	oogonia_meiosis	PHTF1-E
1.20792e-25	-0.205207	0.21	0.595	1.67296e-22	oogonia_meiosis	UBP1-E
1.21809e-25	0.623796	0.755	0.434	1.68705e-22	FGC_mitotic	TONSL-E
1.2183e-25	-0.237929	0.185	0.505	1.68735e-22	oocyte	ZNF782-E
1.21981e-25	0.753345	0.73	0.435	1.68943e-22	PGC_mitotic	ZNF675-E
1.26508e-25	-1.1268	0.145	0.499	1.75213e-22	oocyte	TFDP1-B
1.28026e-25	0.651942	0.815	0.491	1.77316e-22	PGC_mitotic	ZNF668-E
1.42043e-25	-0.629485	0.22	0.544	1.96729e-22	oogonia_STRA8	BARX2-E
1.45038e-25	-1.01156	0.155	0.598	2.00878e-22	oocyte	SSRP1-C
1.50237e-25	-0.310306	0.21	0.557	2.08078e-22	oogonia_meiosis	ZNF41-E
1.50323e-25	-0.59861	0.24	0.568	2.08198e-22	oocyte	POU6F1-E
1.53632e-25	0.591649	0.805	0.52	2.1278e-22	FGC_mitotic	TCFL5-E
1.56874e-25	0.704477	0.77	0.423	2.17271e-22	oogonia_STRA8	FOXO1-AA
1.61033e-25	0.876805	0.805	0.421	2.2303e-22	FGC_mitotic	GCM2-E
1.68372e-25	0.902112	0.72	0.423	2.33195e-22	oogonia_STRA8	SREBF1-AA
1.69993e-25	-0.950021	0.16	0.517	2.3544e-22	oogonia_meiosis	SOX13-C
1.81906e-25	-0.44264	0.21	0.537	2.5194e-22	oogonia_meiosis	ZNF446-E
1.83324e-25	-0.478962	0.265	0.64	2.53904e-22	oocyte	CDC5L-E
1.84056e-25	0.723854	0.795	0.429	2.54918e-22	oocyte	HAND1-E
2.02151e-25	0.629796	0.77	0.394	2.79979e-22	oogonia_STRA8	ZFP2-E
2.123e-25	-0.421998	0.22	0.529	2.94036e-22	oogonia_meiosis	ZNF813-E
2.18513e-25	-0.727762	0.21	0.549	3.02641e-22	oogonia_meiosis	CREB3-C
2.22193e-25	0.723157	0.775	0.46	3.07737e-22	pre-spermatogonia	MEOX2-E
2.25159e-25	0.538748	0.835	0.488	3.11845e-22	PGC_mitotic	MYT1L-E
2.282e-25	-0.114161	0.19	0.534	3.16056e-22	oocyte	DMTF1-E
2.31542e-25	0.481078	0.835	0.42	3.20686e-22	oocyte	HES4-E
2.34319e-25	0.633472	0.74	0.451	3.24532e-22	PGC_mitotic	RORA-D
2.34972e-25	-0.755767	0.24	0.642	3.25436e-22	oocyte	THAP4-E
2.37101e-25	1.18203	0.69	0.418	3.28385e-22	oogonia_meiosis	ZNF660-E
2.47799e-25	-0.295122	0.245	0.62	3.43202e-22	oocyte	ZNF561-E
2.51593e-25	-0.638799	0.245	0.556	3.48456e-22	oogonia_meiosis	ELK4-C
2.56473e-25	0.623741	0.79	0.402	3.55216e-22	oocyte	SALL3-E
2.57463e-25	-0.958438	0.18	0.552	3.56587e-22	oocyte	ZNF165-D
2.73284e-25	-0.715114	0.225	0.54	3.78498e-22	oogonia_STRA8	EBF2-E
2.82036e-25	0.518038	0.745	0.478	3.9062e-22	oogonia_meiosis	SNAI1-B
2.91221e-25	-0.814078	0.16	0.509	4.03341e-22	oogonia_meiosis	NFATC4-E
3.03407e-25	0.870882	0.725	0.442	4.20219e-22	oogonia_STRA8	SREBF2-A
3.03878e-25	-0.588289	0.21	0.564	4.2087e-22	oocyte	ZNF335-E
3.18016e-25	-0.510345	0.265	0.637	4.40452e-22	oocyte	ZBTB2-E
3.19788e-25	0.57216	0.795	0.41	4.42906e-22	oogonia_meiosis	RBPJL-D
3.20174e-25	0.730061	0.815	0.492	4.43441e-22	oocyte	ZNF396-E
3.37365e-25	-0.298565	0.24	0.576	4.67251e-22	oocyte	ZBTB14-E
3.44923e-25	0.627523	0.815	0.512	4.77718e-22	PGC_mitotic	ZNF469-E
3.58255e-25	0.791641	0.73	0.376	4.96183e-22	oocyte	SMARCA5-E
3.60084e-25	0.637015	0.795	0.509	4.98717e-22	oogonia_STRA8	NRL-E
3.81222e-25	-0.502308	0.25	0.622	5.27993e-22	oocyte	ZNFX1-E
3.81588e-25	-0.402032	0.21	0.552	5.285e-22	oocyte	ZNF597-E
4.98884e-25	-0.592515	0.205	0.548	6.90954e-22	oocyte	CXXC1-E
5.1556e-25	0.70707	0.76	0.421	7.1405e-22	PGC	ZNF589-D
5.38316e-25	-0.617379	0.215	0.537	7.45568e-22	oogonia_meiosis	ZNF124-E
5.57422e-25	0.594267	0.78	0.501	7.72029e-22	PGC_mitotic	ZFAT-E
5.65344e-25	-0.264426	0.22	0.567	7.83002e-22	oocyte	HMG20A-E
5.69428e-25	-0.994846	0.17	0.492	7.88658e-22	FGC_mitotic	DMRTC2-E
5.76738e-25	0.727305	0.755	0.422	7.98783e-22	oogonia_STRA8	ZNF133-E
5.826e-25	0.571682	0.87	0.477	8.06901e-22	oocyte	IRF9-B
6.1862e-25	-0.318378	0.215	0.59	8.56788e-22	oocyte	ZBTB6-E
6.51761e-25	-0.279962	0.23	0.593	9.02689e-22	oogonia_meiosis	ZNF343-E
6.64748e-25	-0.909815	0.255	0.501	9.20676e-22	PGC_mitotic	ZSCAN4-E
6.88759e-25	0.571823	0.76	0.393	9.53932e-22	PGC_mitotic	ERG-AA
6.93254e-25	-0.972192	0.17	0.498	9.60156e-22	FGC_mitotic	TCF25-C
7.08144e-25	-0.533172	0.21	0.541	9.80779e-22	oogonia_meiosis	ZNF554-E
7.30655e-25	-0.275522	0.22	0.574	1.01196e-21	oogonia_meiosis	ZNF140-E
7.3573e-25	-0.514115	0.19	0.527	1.01899e-21	oocyte	ZXDC-E
7.36261e-25	0.471635	0.855	0.554	1.01972e-21	PGC_mitotic	PSPC1-E
7.40328e-25	0.462758	0.84	0.522	1.02535e-21	PGC_mitotic	ZNF787-E
8.05325e-25	-0.7193	0.23	0.562	1.11538e-21	oocyte	ZNF775-E
8.58255e-25	-0.10091	0.23	0.567	1.18868e-21	oogonia_meiosis	VEZF1-E
8.69281e-25	-0.65422	0.235	0.598	1.20395e-21	oocyte	ZNF672-E
8.87794e-25	0.531853	0.825	0.508	1.2296e-21	FGC_mitotic	THAP2-E
8.97853e-25	-1.02138	0.13	0.487	1.24353e-21	oocyte	ZNF710-E
9.04489e-25	0.657734	0.79	0.465	1.25272e-21	oogonia_meiosis	MBD1-C
9.06409e-25	-1.03658	0.155	0.487	1.25538e-21	PGC_mitotic	NEUROD6-E
9.27195e-25	0.833642	0.745	0.409	1.28416e-21	PGC_mitotic	SALL4-E
9.43262e-25	0.578868	0.82	0.503	1.30642e-21	PGC_mitotic	ZSCAN5A-E
9.45224e-25	0.775397	0.75	0.406	1.30913e-21	pre-spermatogonia	CSRNP3-E
9.67649e-25	-0.537659	0.205	0.519	1.34019e-21	oocyte	ZC3H4-E
1.00575e-24	0.75777	0.805	0.488	1.39297e-21	oocyte	ZNF606-E
1.0939e-24	-0.257061	0.215	0.565	1.51505e-21	oocyte	ZNF791-E
1.09876e-24	0.705742	0.78	0.451	1.52178e-21	oogonia_meiosis	BNC1-E
1.12384e-24	-0.25046	0.205	0.557	1.55651e-21	oocyte	ZSCAN29-E
1.12675e-24	-0.687667	0.24	0.61	1.56055e-21	oocyte	ZNF513-E
1.19154e-24	-0.661229	0.27	0.54	1.65028e-21	oocyte	ZNF880-E
1.19558e-24	-0.789128	0.255	0.538	1.65588e-21	PGC_mitotic	ZHX1-D
1.29171e-24	-0.203739	0.19	0.524	1.78903e-21	oocyte	ZNF736-E
1.30179e-24	-0.739496	0.205	0.518	1.80298e-21	oocyte	ZNF426-E
1.30503e-24	-0.428587	0.215	0.514	1.80746e-21	oocyte	ZNF155-E
1.31044e-24	-0.5159	0.235	0.597	1.81496e-21	oocyte	MEF2D-E
1.33053e-24	-0.579641	0.21	0.603	1.84278e-21	oocyte	NKX2-8-E
1.35122e-24	-0.235645	0.22	0.545	1.87143e-21	oocyte	ZNF37A-E
1.46876e-24	0.604973	0.78	0.494	2.03424e-21	FGC_mitotic	SMARCA1-E
1.4724e-24	-0.50542	0.225	0.577	2.03928e-21	oocyte	GMEB2-E
1.62778e-24	0.490396	0.835	0.544	2.25448e-21	PGC_mitotic	DNAJC2-E
1.7534e-24	0.763034	0.72	0.384	2.42846e-21	pre-spermatogonia	SMAD9-E
1.75998e-24	0.74765	0.765	0.442	2.43757e-21	PGC_mitotic	ZNF77-E
1.81165e-24	-0.908566	0.22	0.516	2.50913e-21	oogonia_STRA8	JUNB-C
1.83861e-24	0.395667	0.895	0.547	2.54647e-21	PGC_mitotic	GTF3A-E
1.85652e-24	-0.671067	0.23	0.57	2.57128e-21	oocyte	ZFX-C
2.00879e-24	0.624167	0.8	0.537	2.78217e-21	oogonia_STRA8	ETV2-E
2.02094e-24	0.541278	0.83	0.513	2.799e-21	oocyte	ZNF256-E
2.02722e-24	0.57614	0.785	0.47	2.8077e-21	FGC_mitotic	ZNF215-E
2.09632e-24	0.685795	0.74	0.438	2.9034e-21	oocyte	ETV6-C
2.11585e-24	-0.529349	0.235	0.528	2.93045e-21	oogonia_meiosis	HESX1-E
2.15496e-24	-0.977067	0.18	0.525	2.98462e-21	oocyte	TFAP2A-AA
2.29098e-24	0.531985	0.835	0.517	3.173e-21	FGC_mitotic	ZNF511-E
2.31575e-24	-0.729342	0.23	0.616	3.20732e-21	oocyte	THAP7-E
2.39316e-24	0.627258	0.8	0.486	3.31453e-21	oocyte	ZNF746-E
2.43205e-24	-0.641959	0.205	0.509	3.36839e-21	oogonia_meiosis	POU4F3-E
2.61893e-24	-0.992036	0.15	0.505	3.62722e-21	PGC_mitotic	ZNF536-E
2.627e-24	-0.978904	0.175	0.517	3.63839e-21	PGC_mitotic	MYT1-E
2.64093e-24	-0.30463	0.235	0.578	3.65769e-21	oocyte	ZSCAN16-E
2.74413e-24	-0.245826	0.205	0.577	3.80062e-21	oocyte	ZNF140-E
2.8093e-24	-0.379237	0.24	0.6	3.89089e-21	oocyte	PBRM1-E
2.82294e-24	-0.497796	0.24	0.522	3.90977e-21	oogonia_meiosis	ESX1-E
2.9109e-24	-0.875008	0.175	0.511	4.0316e-21	oocyte	SMARCC2-C
2.94674e-24	0.482446	0.865	0.552	4.08124e-21	FGC_mitotic	GTF3A-E
2.97748e-24	-0.923172	0.205	0.543	4.12381e-21	PGC	PRDM1-C
2.98198e-24	-0.826209	0.18	0.547	4.13004e-21	PGC_mitotic	SMAD2-B
3.01446e-24	-0.251686	0.25	0.611	4.17502e-21	oogonia_meiosis	LRRFIP2-E
3.03572e-24	-0.875178	0.225	0.528	4.20447e-21	PGC_mitotic	ARX-E
3.05608e-24	0.537176	0.79	0.452	4.23266e-21	oocyte	HES5-E
3.07569e-24	-0.450479	0.215	0.535	4.25983e-21	oogonia_meiosis	HOXA5-E
3.18722e-24	0.572105	0.81	0.507	4.41431e-21	PGC_mitotic	TADA2A-E
3.20135e-24	0.684556	0.805	0.468	4.43386e-21	oocyte	ZNF85-E
3.29821e-24	-0.896014	0.24	0.495	4.56802e-21	PGC_mitotic	SMAD1-C
3.36138e-24	-0.437754	0.205	0.54	4.65552e-21	oogonia_meiosis	ZNF502-E
3.48871e-24	-0.285012	0.18	0.517	4.83187e-21	oocyte	ZNF133-E
3.52625e-24	-0.754044	0.245	0.573	4.88386e-21	oocyte	ZBTB42-E
3.85304e-24	0.708243	0.785	0.469	5.33647e-21	oogonia_meiosis	HOXD10-E
3.8544e-24	-0.860212	0.2	0.547	5.33834e-21	FGC_mitotic	BARX2-E
3.87731e-24	0.643389	0.76	0.447	5.37008e-21	PGC_mitotic	PRRX2-E
4.00622e-24	0.623933	0.8	0.501	5.54862e-21	oogonia_STRA8	ZFPM1-E
4.00772e-24	0.796135	0.73	0.422	5.55069e-21	PGC	ZNF584-D
4.02703e-24	0.682584	0.77	0.419	5.57743e-21	PGC_mitotic	ZNF589-D
4.12868e-24	-0.211393	0.225	0.6	5.71822e-21	oogonia_meiosis	ZNF131-E
4.29928e-24	-1.01913	0.17	0.529	5.9545e-21	oogonia_meiosis	ZKSCAN1-C
4.3515e-24	-0.213006	0.215	0.578	6.02682e-21	oocyte	ZKSCAN5-E
4.52604e-24	0.647759	0.765	0.443	6.26856e-21	PGC_mitotic	ZSCAN25-E
4.65841e-24	-0.932112	0.135	0.508	6.4519e-21	oogonia_meiosis	TBX15-E
4.71054e-24	-0.878935	0.225	0.517	6.5241e-21	oogonia_meiosis	PAX9-E
4.71619e-24	-0.845862	0.16	0.482	6.53192e-21	PGC	YBX3-E
4.75643e-24	-0.775812	0.26	0.626	6.58765e-21	oocyte	ZNF358-E
4.82275e-24	-0.714639	0.275	0.565	6.67951e-21	PGC_mitotic	HES2-E
4.8693e-24	0.562024	0.84	0.503	6.74398e-21	PGC_mitotic	ZNF3-E
5.07381e-24	-0.491027	0.25	0.613	7.02723e-21	oocyte	TCFL5-E
5.18181e-24	-0.602785	0.25	0.505	7.17681e-21	oogonia_meiosis	SHOX2-E
5.2219e-24	-0.600526	0.26	0.608	7.23233e-21	oocyte	KLF14-E
5.36959e-24	-0.483164	0.195	0.563	7.43688e-21	oogonia_meiosis	ZNF557-E
5.55375e-24	-0.69559	0.27	0.562	7.69194e-21	oogonia_meiosis	CEBPD-A
5.74256e-24	-0.205007	0.22	0.559	7.95345e-21	oocyte	ZNF680-E
5.94555e-24	0.47074	0.865	0.537	8.23458e-21	FGC_mitotic	THAP4-E
5.99413e-24	-1.10389	0.125	0.513	8.30187e-21	oogonia_meiosis	TEAD4-C
6.0703e-24	0.576895	0.79	0.483	8.40736e-21	PGC_mitotic	ZNF398-E
6.08559e-24	-0.831826	0.185	0.557	8.42854e-21	oocyte	ZBTB7C-E
6.10356e-24	-0.478001	0.185	0.539	8.45343e-21	oocyte	ZNF577-E
6.1309e-24	-0.776706	0.27	0.583	8.49129e-21	PGC	RUNX3-A
6.42593e-24	-0.665628	0.235	0.591	8.89991e-21	oocyte	WIZ-E
6.62054e-24	0.710553	0.81	0.465	9.16945e-21	oocyte	ZNF397-E
6.72743e-24	0.518306	0.84	0.51	9.31749e-21	PGC_mitotic	ZNF513-E
6.805e-24	0.636717	0.785	0.481	9.42493e-21	PGC_mitotic	ZNF778-E
6.82202e-24	0.450298	0.855	0.569	9.44849e-21	FGC_mitotic	DNAJC1-E
6.91399e-24	-0.243621	0.235	0.564	9.57588e-21	oogonia_meiosis	HMG20A-E
7.15064e-24	-0.474296	0.245	0.557	9.90364e-21	oogonia_meiosis	CUX2-E
7.57455e-24	0.687672	0.75	0.441	1.04908e-20	FGC_mitotic	E2F5-C
7.7127e-24	-0.92011	0.22	0.521	1.06821e-20	oogonia_STRA8	BCL6B-E
7.74332e-24	-0.577626	0.275	0.624	1.07245e-20	oocyte	ETV2-E
8.12254e-24	-0.225115	0.23	0.585	1.12497e-20	oocyte	ZNF354A-E
8.22994e-24	-0.727212	0.255	0.568	1.13985e-20	oogonia_STRA8	TSHZ2-E
8.60864e-24	0.928855	0.735	0.489	1.1923e-20	PGC_mitotic	ETS2-A
8.99094e-24	0.597892	0.77	0.426	1.24525e-20	pre-spermatogonia	POU5F1B-E
9.1852e-24	-0.26026	0.245	0.637	1.27215e-20	oogonia_meiosis	TBPL1-E
9.21524e-24	-0.351935	0.215	0.543	1.27631e-20	oocyte	ZNF432-E
9.8389e-24	-0.919182	0.2	0.601	1.36269e-20	oocyte	ZFPM1-E
1.00024e-23	-0.234968	0.22	0.56	1.38533e-20	oocyte	PRDM2-E
1.04561e-23	-0.962296	0.175	0.507	1.44817e-20	oocyte	HIVEP3-E
1.05679e-23	-0.309595	0.24	0.571	1.46365e-20	oocyte	ZNF627-E
1.05895e-23	-0.827339	0.175	0.529	1.46664e-20	oogonia_meiosis	ZNF763-E
1.07779e-23	-0.398271	0.24	0.621	1.49274e-20	oocyte	ZNF770-E
1.1058e-23	0.69501	0.77	0.452	1.53154e-20	oogonia_meiosis	BARX2-E
1.12404e-23	-0.840999	0.23	0.547	1.55679e-20	FGC_mitotic	TOX3-E
1.14516e-23	-0.375348	0.215	0.568	1.58605e-20	oocyte	ZNF548-E
1.15218e-23	0.850838	0.71	0.395	1.59577e-20	oogonia_STRA8	ZNF707-E
1.16223e-23	-0.361638	0.265	0.607	1.60969e-20	oocyte	ZNF468-E
1.20139e-23	0.717038	0.765	0.422	1.66392e-20	oocyte	BHLHE41-E
1.22429e-23	-0.701417	0.25	0.579	1.69564e-20	oogonia_STRA8	OSR2-E
1.23649e-23	-0.577521	0.21	0.488	1.71253e-20	oocyte	ZNF714-E
1.25659e-23	-0.923784	0.165	0.532	1.74038e-20	FGC_mitotic	SIM1-E
1.26397e-23	-0.965124	0.2	0.479	1.75059e-20	FGC_mitotic	NEUROD6-E
1.30609e-23	-0.0919462	0.205	0.534	1.80894e-20	oocyte	ZNF684-E
1.36722e-23	-0.575774	0.195	0.491	1.8936e-20	oocyte	ZNF107-E
1.37623e-23	-0.419059	0.165	0.53	1.90608e-20	oocyte	ZNF600-E
1.42532e-23	-1.00519	0.165	0.496	1.97407e-20	oogonia_meiosis	SIX5-C
1.45321e-23	-0.840725	0.22	0.523	2.01269e-20	oocyte	TONSL-E
1.49275e-23	0.615143	0.785	0.455	2.06746e-20	oogonia_meiosis	TOX3-E
1.50088e-23	-0.339304	0.225	0.539	2.07872e-20	oogonia_meiosis	ZNF257-E
1.50429e-23	0.679637	0.785	0.474	2.08344e-20	oocyte	GRHL3-E
1.60813e-23	-0.158709	0.225	0.552	2.22726e-20	oocyte	ZNF138-E
1.6554e-23	-0.498666	0.175	0.522	2.29273e-20	oocyte	ZNF786-E
1.74651e-23	-0.0863039	0.195	0.552	2.41891e-20	oocyte	ZNF33A-E
1.7643e-23	0.633591	0.78	0.393	2.44356e-20	oocyte	ZBTB4-E
1.82929e-23	-1.0652	0.11	0.458	2.53357e-20	PGC	E2F8-E
1.83437e-23	-0.845146	0.205	0.541	2.5406e-20	oocyte	ATRX-D
1.88961e-23	0.59788	0.8	0.438	2.61711e-20	PGC	BATF3-E
1.95945e-23	0.763292	0.775	0.443	2.71384e-20	oogonia_STRA8	ZNF446-E
1.96096e-23	-0.309	0.24	0.591	2.71593e-20	oogonia_meiosis	ZNF28-E
1.98761e-23	0.542842	0.865	0.505	2.75284e-20	PGC_mitotic	ZNF683-E
2.37919e-23	0.653851	0.76	0.442	3.29517e-20	PGC_mitotic	ZNF71-E
2.40087e-23	-0.284614	0.24	0.578	3.32521e-20	oogonia_meiosis	ZNF410-E
2.45936e-23	-0.958529	0.195	0.521	3.40621e-20	oogonia_meiosis	NPAS1-E
2.50829e-23	0.439065	0.86	0.547	3.47399e-20	PGC_mitotic	MLX-E
2.54445e-23	-0.406403	0.25	0.583	3.52406e-20	oocyte	ADNP2-E
2.54897e-23	-0.0764686	0.23	0.548	3.53032e-20	oogonia_meiosis	ZBTB38-E
2.5565e-23	-0.280624	0.19	0.539	3.54075e-20	oogonia_meiosis	ZSCAN25-E
2.55767e-23	-0.454211	0.24	0.545	3.54237e-20	oocyte	ZNF460-E
2.56557e-23	0.928403	0.705	0.448	3.55332e-20	pre-spermatogonia	TOX-E
2.63117e-23	-1.14272	0.07	0.502	3.64417e-20	oogonia_meiosis	NR1H3-B
2.63789e-23	-0.577192	0.265	0.648	3.65348e-20	oocyte	ZNF32-E
2.81221e-23	-0.534099	0.2	0.523	3.8949e-20	oocyte	ZNF675-E
2.8692e-23	0.625004	0.75	0.502	3.97384e-20	PGC	ETV4-A
2.91757e-23	0.752589	0.76	0.459	4.04084e-20	oogonia_meiosis	BCL11B-E
2.91843e-23	0.586163	0.795	0.428	4.04202e-20	oocyte	SIM1-E
2.93622e-23	-0.229479	0.2	0.525	4.06667e-20	oogonia_meiosis	ZXDC-E
3.00808e-23	0.486582	0.79	0.398	4.16619e-20	oocyte	ZIC5-E
3.0216e-23	0.561049	0.79	0.428	4.18491e-20	oogonia_STRA8	TONSL-E
3.18962e-23	-0.595155	0.245	0.59	4.41763e-20	oocyte	ZFAT-E
3.25024e-23	-0.257173	0.23	0.564	4.50158e-20	oocyte	ZNF614-E
3.40654e-23	-0.196454	0.21	0.537	4.71806e-20	oocyte	ZFP69-E
3.4575e-23	0.688453	0.765	0.456	4.78864e-20	oogonia_meiosis	IRX4-E
3.4714e-23	-0.36874	0.19	0.515	4.80789e-20	oocyte	ZNF829-E
3.60127e-23	0.654556	0.77	0.504	4.98776e-20	PGC	HIF3A-E
3.69904e-23	0.714692	0.75	0.43	5.12317e-20	PGC	TFAP2A-AA
3.70885e-23	-0.135185	0.225	0.588	5.13676e-20	oogonia_meiosis	ZNF655-E
3.8411e-23	-0.300204	0.195	0.51	5.31992e-20	oocyte	ZBTB40-E
3.87064e-23	-0.771374	0.235	0.578	5.36084e-20	oogonia_STRA8	NPAS4-E
3.87298e-23	0.728696	0.74	0.45	5.36407e-20	PGC	CUX1-C
4.06666e-23	-0.597361	0.24	0.548	5.63233e-20	oocyte	HSF4-E
4.0976e-23	0.538178	0.825	0.526	5.67517e-20	PGC_mitotic	ZNFX1-E
4.17756e-23	-0.687736	0.245	0.616	5.78591e-20	oocyte	ZNF511-E
4.57562e-23	0.571073	0.73	0.48	6.33724e-20	PGC	IRF4-B
4.74077e-23	-0.387192	0.27	0.622	6.56597e-20	oocyte	ZFP91-E
4.86588e-23	0.666561	0.76	0.468	6.73924e-20	PGC_mitotic	SP1-AA
4.86833e-23	-0.333387	0.22	0.533	6.74263e-20	oocyte	ZBTB5-E
4.92274e-23	-0.125719	0.195	0.518	6.818e-20	oocyte	ZNF571-E
5.0135e-23	0.0838225	0.19	0.536	6.94369e-20	oocyte	ZNF226-E
5.10032e-23	-0.477476	0.245	0.521	7.06395e-20	FGC_mitotic	MSC-B
5.16641e-23	-0.213754	0.195	0.546	7.15548e-20	oocyte	ZNF280C-E
5.18439e-23	0.618518	0.735	0.397	7.18039e-20	pre-spermatogonia	ZNF853-E
5.20906e-23	-1.12969	0.125	0.497	7.21455e-20	oogonia_meiosis	STAT4-B
5.27361e-23	-0.656523	0.23	0.569	7.30395e-20	oocyte	JARID2-D
5.40142e-23	-0.50864	0.225	0.583	7.48097e-20	oocyte	ZBTB17-E
5.48499e-23	-0.859514	0.245	0.546	7.59671e-20	PGC_mitotic	POU3F3-E
5.51581e-23	0.71592	0.785	0.444	7.6394e-20	oocyte	ZBTB1-E
5.56438e-23	0.624458	0.755	0.425	7.70666e-20	PGC	MEIS3-E
5.58349e-23	0.69423	0.775	0.403	7.73313e-20	oocyte	ZBTB32-E
5.63171e-23	0.766653	0.74	0.411	7.79991e-20	oogonia_STRA8	ZNF280B-E
5.83371e-23	-0.964407	0.195	0.568	8.07969e-20	PGC	NPAS3-E
5.95714e-23	0.751523	0.755	0.39	8.25064e-20	oocyte	FEV-E
6.04574e-23	0.641956	0.74	0.457	8.37336e-20	PGC_mitotic	ZNF766-D
6.11259e-23	-0.201793	0.225	0.576	8.46593e-20	oogonia_meiosis	ZNF33B-E
6.17897e-23	-0.172451	0.235	0.574	8.55788e-20	oogonia_meiosis	ZKSCAN5-E
6.31434e-23	-0.140525	0.225	0.566	8.74537e-20	oogonia_meiosis	ZNF260-E
6.32773e-23	-0.404988	0.235	0.552	8.7639e-20	oogonia_meiosis	NOTO-E
6.36399e-23	-1.12653	0.105	0.492	8.81412e-20	oogonia_meiosis	NR1H2-B
6.40336e-23	-0.53756	0.19	0.517	8.86866e-20	oocyte	ELMSAN1-E
6.64895e-23	0.585612	0.77	0.469	9.20879e-20	PGC_mitotic	PRDM15-E
7.14162e-23	0.529562	0.805	0.514	9.89114e-20	FGC_mitotic	DBP-E
7.56274e-23	0.748482	0.745	0.383	1.04744e-19	oocyte	ETV3-E
7.67824e-23	0.744097	0.775	0.473	1.06344e-19	PGC_mitotic	MIER2-E
7.79417e-23	-1.12979	0.125	0.478	1.07949e-19	oogonia_meiosis	CASZ1-E
7.99688e-23	0.620323	0.785	0.474	1.10757e-19	PGC_mitotic	ZNF324B-E
8.07759e-23	0.815213	0.75	0.426	1.11875e-19	FGC_mitotic	SATB2-E
8.38736e-23	0.596908	0.805	0.485	1.16165e-19	oogonia_meiosis	ZNF746-E
8.44485e-23	0.579692	0.8	0.515	1.16961e-19	oocyte	IRF6-E
8.47559e-23	-1.12383	0.075	0.511	1.17387e-19	oogonia_meiosis	NANOG-A
8.98219e-23	0.614749	0.775	0.437	1.24403e-19	PGC	KLF2-B
9.19344e-23	-0.425299	0.205	0.512	1.27329e-19	oocyte	ZSCAN20-E
9.75375e-23	0.562296	0.75	0.443	1.35089e-19	PGC_mitotic	ZNF799-E
9.75864e-23	-0.660958	0.28	0.605	1.35157e-19	PGC_mitotic	ZNF256-E
9.90309e-23	-0.828713	0.2	0.534	1.37158e-19	oocyte	SNAPC4-C
1.04086e-22	0.566033	0.78	0.522	1.44159e-19	oogonia_STRA8	ZNF524-E
1.09583e-22	-0.275035	0.21	0.522	1.51773e-19	oocyte	RFX7-E
1.10679e-22	-0.0563543	0.21	0.547	1.5329e-19	oocyte	ZNF616-E
1.11413e-22	-0.836234	0.2	0.588	1.54306e-19	FGC_mitotic	CDX2-A
1.1191e-22	0.497027	0.83	0.498	1.54995e-19	PGC_mitotic	ZFP64-E
1.15349e-22	0.723848	0.805	0.438	1.59758e-19	oocyte	ZNF224-E
1.19201e-22	-0.471409	0.205	0.511	1.65093e-19	oocyte	ZSCAN21-E
1.22034e-22	-1.17492	0.055	0.468	1.69017e-19	pre-spermatogonia	E2F8-E
1.27931e-22	-0.254252	0.195	0.558	1.77184e-19	oocyte	PRDM10-E
1.38424e-22	0.446239	0.83	0.495	1.91718e-19	FGC_mitotic	ARNTL2-E
1.466e-22	0.246133	0.925	0.407	2.03041e-19	oocyte	HSF5-E
1.49317e-22	-0.550012	0.245	0.558	2.06803e-19	oogonia_meiosis	GSC2-E
1.50349e-22	-0.63575	0.255	0.536	2.08233e-19	oogonia_meiosis	GBX1-E
1.52143e-22	0.711416	0.76	0.444	2.10718e-19	oocyte	ZNF268-E
1.57152e-22	-0.730163	0.25	0.595	2.17655e-19	oocyte	ZNF579-E
1.76825e-22	0.749432	0.695	0.362	2.44903e-19	FGC_mitotic	ZNF726-E
1.79699e-22	-0.520925	0.195	0.513	2.48883e-19	oocyte	ZNF516-E
1.8144e-22	0.527668	0.83	0.447	2.51295e-19	oogonia_meiosis	UNCX-E
1.87732e-22	-0.537473	0.185	0.53	2.60009e-19	oogonia_meiosis	ZNF189-E
2.14854e-22	0.647392	0.775	0.418	2.97573e-19	oocyte	ZNF438-E
2.17853e-22	0.600521	0.76	0.472	3.01727e-19	oocyte	MXD1-E
2.20545e-22	-0.190417	0.23	0.562	3.05455e-19	oocyte	ZNF691-E
2.23532e-22	-0.163722	0.2	0.55	3.09591e-19	oocyte	RBAK-E
2.29734e-22	-0.587829	0.18	0.497	3.18182e-19	oogonia_meiosis	ZFP41-E
2.30264e-22	-0.596862	0.225	0.515	3.18916e-19	oogonia_meiosis	GBX2-E
2.34908e-22	-0.715838	0.205	0.536	3.25348e-19	oogonia_meiosis	ZNF77-E
2.35067e-22	-0.81395	0.15	0.491	3.25568e-19	oogonia_meiosis	NFKBID-E
2.35713e-22	-0.13273	0.215	0.567	3.26462e-19	oocyte	ZNF227-E
2.36711e-22	0.563997	0.77	0.408	3.27845e-19	PGC	GLIS2-E
2.76341e-22	-0.590451	0.215	0.55	3.82732e-19	oogonia_meiosis	ZNF718-E
2.80205e-22	0.459878	0.86	0.537	3.88084e-19	PGC_mitotic	ZNF146-E
2.80615e-22	-0.767886	0.245	0.566	3.88651e-19	oogonia_STRA8	LHX6-E
2.85411e-22	-0.945132	0.185	0.486	3.95294e-19	FGC_mitotic	SIX6-E
2.87164e-22	0.599612	0.79	0.498	3.97722e-19	PGC_mitotic	WIZ-E
2.90624e-22	-0.805123	0.24	0.571	4.02515e-19	PGC	MSX1-E
2.95921e-22	-0.779184	0.255	0.569	4.0985e-19	oogonia_STRA8	IRX2-E
2.98193e-22	0.491439	0.795	0.529	4.12997e-19	PGC_mitotic	NFX1-E
2.98686e-22	0.645603	0.73	0.42	4.13681e-19	PGC_mitotic	ZNF319-E
2.99287e-22	-1.01911	0.19	0.557	4.14513e-19	PGC	FOXJ1-E
2.9981e-22	-0.294772	0.195	0.517	4.15236e-19	oocyte	KDM2A-E
3.00152e-22	0.373029	0.86	0.457	4.15711e-19	oogonia_meiosis	NPAS3-E
3.03943e-22	-0.765096	0.235	0.539	4.20962e-19	PGC_mitotic	FOXO3-AA
3.0699e-22	-0.582868	0.235	0.544	4.25181e-19	oogonia_STRA8	IRX4-E
3.28363e-22	0.496048	0.81	0.492	4.54783e-19	FGC_mitotic	MYT1L-E
3.30599e-22	-0.919621	0.205	0.507	4.57879e-19	PGC_mitotic	ID2-E
3.30956e-22	0.65349	0.72	0.389	4.58374e-19	pre-spermatogonia	SOX5-E
3.33895e-22	0.433573	0.84	0.51	4.62444e-19	oogonia_meiosis	NCOR2-C
3.4964e-22	0.690364	0.72	0.446	4.84252e-19	oocyte	ARX-E
3.50452e-22	-0.735975	0.295	0.588	4.85377e-19	pre-spermatogonia	TBX3-E
3.62885e-22	0.65076	0.75	0.443	5.02596e-19	FGC_mitotic	HSF1-B
3.76834e-22	-0.848079	0.27	0.527	5.21915e-19	oocyte	GLI1-B
3.83344e-22	-0.106625	0.205	0.537	5.30931e-19	oogonia_meiosis	ZNF641-E
4.73082e-22	0.824947	0.78	0.451	6.55219e-19	FGC_mitotic	PRDM6-E
4.75884e-22	-0.188837	0.245	0.593	6.59099e-19	oogonia_meiosis	HMGXB4-E
4.78869e-22	0.620294	0.775	0.47	6.63233e-19	PGC_mitotic	ZNF586-E
4.91553e-22	0.512143	0.795	0.504	6.80801e-19	PGC_mitotic	SFPQ-E
5.46341e-22	-0.43339	0.25	0.577	7.56682e-19	oocyte	ZNF410-E
5.65881e-22	0.593202	0.78	0.438	7.83746e-19	oogonia_meiosis	LHX3-E
5.70969e-22	-1.14138	0.16	0.485	7.90792e-19	oogonia_meiosis	KLF9-C
5.78034e-22	0.616963	0.76	0.47	8.00577e-19	PGC_mitotic	ZNF200-E
6.01705e-22	-0.938398	0.2	0.479	8.33361e-19	FGC_mitotic	FEZF2-E
6.02385e-22	0.496815	0.81	0.516	8.34304e-19	FGC_mitotic	KLF14-E
6.06329e-22	0.457287	0.835	0.529	8.39766e-19	PGC	ATF5-E
6.13229e-22	0.4412	0.835	0.54	8.49322e-19	PGC_mitotic	TFAM-E
6.36386e-22	-0.168985	0.185	0.525	8.81394e-19	oocyte	ZNF621-E
6.64452e-22	0.45575	0.82	0.563	9.20266e-19	FGC_mitotic	LYAR-E
6.69879e-22	-0.745084	0.18	0.485	9.27783e-19	oocyte	TFAP2E-E
7.11247e-22	0.449699	0.85	0.527	9.85077e-19	PGC_mitotic	ZFP69B-E
7.49825e-22	-0.0984662	0.21	0.552	1.03851e-18	oogonia_meiosis	MGA-E
7.84473e-22	-0.302737	0.225	0.617	1.08649e-18	oocyte	TFDP2-E
7.99018e-22	-0.247419	0.21	0.558	1.10664e-18	oocyte	KAT6B-E
8.07223e-22	-0.904516	0.215	0.503	1.118e-18	FGC_mitotic	KLF12-E
8.12686e-22	-0.592536	0.265	0.583	1.12557e-18	oogonia_STRA8	ZNF396-E
8.19816e-22	-1.07096	0.17	0.492	1.13545e-18	pre-spermatogonia	IRF5-E
8.59829e-22	-0.127057	0.23	0.561	1.19086e-18	oocyte	ZKSCAN8-E
8.61148e-22	-0.0831984	0.19	0.545	1.19269e-18	oocyte	ZNF506-E
8.77736e-22	-0.556638	0.24	0.577	1.21566e-18	oocyte	ZNF563-E
8.78449e-22	-0.224517	0.195	0.519	1.21665e-18	oocyte	ZNF100-E
9.39198e-22	-0.728502	0.17	0.52	1.30079e-18	oogonia_meiosis	GRHL1-E
9.40487e-22	0.771553	0.72	0.408	1.30257e-18	pre-spermatogonia	FOXD1-E
9.42579e-22	-0.254195	0.215	0.554	1.30547e-18	oogonia_meiosis	ZNF138-E
9.5063e-22	0.019222	0.22	0.526	1.31662e-18	oocyte	ZNF879-E
9.5863e-22	-0.500872	0.235	0.574	1.3277e-18	oocyte	SOX3-E
9.76762e-22	0.765809	0.755	0.395	1.35282e-18	oocyte	SP140-E
1.03038e-21	0.713736	0.78	0.432	1.42708e-18	oocyte	NR2C1-E
1.07348e-21	0.662291	0.755	0.452	1.48677e-18	oogonia_meiosis	EBF2-E
1.09796e-21	0.459414	0.815	0.534	1.52067e-18	FGC_mitotic	ETV2-E
1.10428e-21	-1.09949	0.1	0.503	1.52943e-18	pre-spermatogonia	E2F4-AA
1.15148e-21	-1.33008	0.12	0.442	1.59479e-18	PGC	ZNF487-E
1.20777e-21	-0.321426	0.25	0.609	1.67276e-18	oocyte	ZFP1-E
1.21386e-21	0.668635	0.745	0.427	1.6812e-18	FGC_mitotic	HOXA7-E
1.22067e-21	-0.815189	0.235	0.511	1.69062e-18	PGC_mitotic	HOXA4-E
1.26896e-21	-0.233719	0.22	0.546	1.75751e-18	oocyte	ZNF507-E
1.28882e-21	0.443607	0.835	0.527	1.78501e-18	PGC	ZNF423-E
1.3022e-21	-0.22355	0.21	0.537	1.80354e-18	oogonia_meiosis	ARID3B-E
1.30863e-21	-0.79059	0.205	0.529	1.81245e-18	oocyte	RREB1-E
1.33974e-21	-0.807533	0.245	0.489	1.85554e-18	PGC	NR2F2-B
1.34041e-21	-0.489617	0.17	0.516	1.85647e-18	oocyte	ZNF772-E
1.34767e-21	-0.0182203	0.185	0.511	1.86652e-18	oocyte	ZNF780B-E
1.34785e-21	0.478634	0.8	0.507	1.86677e-18	PGC_mitotic	ZBTB24-E
1.37359e-21	0.682981	0.78	0.486	1.90242e-18	oogonia_STRA8	ZNF362-E
1.38407e-21	-0.212257	0.21	0.542	1.91693e-18	oocyte	ZNF81-E
1.4013e-21	0.496354	0.765	0.408	1.9408e-18	PGC_mitotic	ZNF681-E
1.45348e-21	-0.197174	0.23	0.614	2.01308e-18	oocyte	ARID4A-E
1.50303e-21	-0.704323	0.235	0.611	2.0817e-18	pre-spermatogonia	SOX2-A
1.52239e-21	0.645257	0.755	0.475	2.10851e-18	oogonia_STRA8	ZNF213-E
1.53228e-21	-0.847545	0.185	0.519	2.12221e-18	oogonia_meiosis	MYF6-E
1.53546e-21	0.580759	0.75	0.419	2.12661e-18	PGC_mitotic	SOX13-C
1.53664e-21	0.629159	0.81	0.463	2.12824e-18	oocyte	POU3F2-D
1.58527e-21	-0.897403	0.185	0.513	2.1956e-18	PGC_mitotic	THAP11-C
1.60777e-21	-0.256141	0.24	0.547	2.22676e-18	oocyte	MGA-E
1.60851e-21	0.59211	0.705	0.434	2.22779e-18	oocyte	KLF4-A
1.63014e-21	0.658214	0.705	0.423	2.25774e-18	FGC_mitotic	MYCN-A
1.63047e-21	0.525529	0.79	0.513	2.25821e-18	oogonia_STRA8	ZC3H8-D
1.68065e-21	0.670989	0.79	0.451	2.32771e-18	oogonia_STRA8	CXXC1-E
1.70291e-21	-0.0480078	0.175	0.507	2.35853e-18	oocyte	ZNF493-E
1.74665e-21	-0.107045	0.215	0.522	2.4191e-18	oocyte	ZNF75D-E
1.89156e-21	-0.808587	0.23	0.564	2.61981e-18	oocyte	MIER2-E
2.00886e-21	-0.792494	0.265	0.509	2.78227e-18	oogonia_meiosis	ESRRG-E
2.04584e-21	0.676636	0.77	0.409	2.83349e-18	oocyte	NHLH2-E
2.06019e-21	0.454339	0.81	0.576	2.85337e-18	FGC_mitotic	ZNF277-E
2.1264e-21	0.566299	0.815	0.48	2.94506e-18	PGC	ELF4-E
2.12861e-21	0.421761	0.815	0.445	2.94812e-18	oocyte	ZHX1-D
2.32717e-21	0.503519	0.755	0.472	3.22313e-18	oocyte	SPIB-C
2.40111e-21	-0.566188	0.195	0.524	3.32553e-18	oocyte	ZNF101-E
2.4584e-21	-0.259624	0.27	0.608	3.40489e-18	oocyte	LRRFIP2-E
2.52648e-21	0.604608	0.77	0.486	3.49918e-18	PGC_mitotic	GMEB2-E
2.63563e-21	-0.84162	0.165	0.517	3.65034e-18	oogonia_meiosis	PKNOX1-C
2.68571e-21	-0.780807	0.265	0.537	3.7197e-18	PGC_mitotic	NFIB-E
2.72174e-21	0.697066	0.755	0.422	3.76961e-18	oocyte	ZIC2-E
2.75359e-21	-0.933942	0.165	0.502	3.81373e-18	FGC_mitotic	ZIC5-E
2.79942e-21	0.444781	0.83	0.512	3.8772e-18	PGC_mitotic	ZNF468-E
2.84413e-21	0.4232	0.82	0.533	3.93912e-18	PGC_mitotic	YY2-E
2.89525e-21	-0.787673	0.265	0.539	4.00992e-18	FGC_mitotic	HES7-E
2.9078e-21	-0.846877	0.175	0.547	4.0273e-18	oocyte	SIX1-E
2.93949e-21	-0.928214	0.2	0.532	4.07119e-18	oocyte	NFYB-B
2.97103e-21	0.520572	0.81	0.468	4.11487e-18	PGC_mitotic	ZNF614-E
3.00845e-21	-0.792015	0.265	0.568	4.1667e-18	pre-spermatogonia	ETS2-A
3.21636e-21	-0.700672	0.25	0.62	4.45466e-18	oocyte	ZNF787-E
3.38173e-21	0.542152	0.825	0.532	4.68369e-18	FGC_mitotic	NFAT5-E
3.48002e-21	-0.629716	0.265	0.569	4.81982e-18	oogonia_STRA8	E2F6-B
3.5436e-21	-0.905569	0.21	0.535	4.90789e-18	oocyte	SCX-E
3.57044e-21	0.747423	0.73	0.423	4.94505e-18	oogonia_STRA8	SALL1-E
3.62226e-21	-0.892079	0.19	0.512	5.01683e-18	oogonia_meiosis	SREBF1-AA
3.68597e-21	-0.711378	0.255	0.545	5.10506e-18	PGC	TCF7L2-A
3.68941e-21	-0.515357	0.195	0.524	5.10984e-18	oogonia_meiosis	ZNF675-E
3.69865e-21	0.570545	0.775	0.428	5.12263e-18	oocyte	ARID5A-E
3.79851e-21	0.664919	0.765	0.463	5.26093e-18	oogonia_STRA8	ZNF846-E
3.82137e-21	-0.733015	0.21	0.544	5.2926e-18	oogonia_meiosis	SP2-C
3.82471e-21	-1.07987	0.16	0.534	5.29722e-18	FGC_mitotic	HSF5-E
3.87684e-21	-0.0996776	0.2	0.547	5.36942e-18	oocyte	ZFP90-E
3.89959e-21	-0.977679	0.14	0.508	5.40093e-18	oogonia_meiosis	PITX1-B
3.92343e-21	-0.628879	0.25	0.585	5.43396e-18	oocyte	ZNF668-E
4.16924e-21	0.574465	0.79	0.47	5.7744e-18	PGC	GLIS3-E
4.22864e-21	0.755094	0.735	0.469	5.85666e-18	pre-spermatogonia	POU2F3-E
4.25906e-21	0.479784	0.81	0.437	5.8988e-18	PGC	YBX1-A
4.29979e-21	0.563924	0.79	0.468	5.95521e-18	oocyte	ZGPAT-E
4.35041e-21	0.529609	0.785	0.505	6.02532e-18	PGC_mitotic	ZNF777-E
4.38783e-21	-0.898584	0.235	0.472	6.07714e-18	oogonia_STRA8	CSRNP1-E
4.46452e-21	-0.624113	0.215	0.553	6.18336e-18	oocyte	NHLH1-E
4.5371e-21	-0.207146	0.2	0.537	6.28388e-18	oocyte	ZNF641-E
4.65046e-21	-0.435069	0.225	0.586	6.44088e-18	oocyte	KLF11-E
4.79583e-21	-0.958402	0.18	0.49	6.64222e-18	FGC_mitotic	NR1I3-D
4.83962e-21	-0.976992	0.17	0.489	6.70288e-18	PGC_mitotic	ELK3-E
4.87277e-21	-0.342444	0.285	0.632	6.74878e-18	oocyte	CREBL2-E
5.09784e-21	-0.79733	0.27	0.509	7.06052e-18	PGC_mitotic	ID4-E
5.2297e-21	0.622782	0.775	0.448	7.24313e-18	oocyte	SMAD2-B
5.23642e-21	-0.678048	0.19	0.516	7.25244e-18	oogonia_meiosis	ZNF83-D
5.44185e-21	0.968283	0.685	0.432	7.53696e-18	pre-spermatogonia	SIX2-C
5.50957e-21	-0.808489	0.205	0.518	7.63076e-18	oocyte	ETV1-C
5.57044e-21	-0.184141	0.205	0.558	7.71506e-18	oocyte	ZNF41-E
5.61749e-21	0.572682	0.79	0.459	7.78023e-18	oogonia_meiosis	CREB1-AA
5.69113e-21	0.420513	0.855	0.526	7.88221e-18	FGC_mitotic	ATF5-E
5.84452e-21	0.492098	0.8	0.482	8.09466e-18	FGC_mitotic	ZNF362-E
5.90154e-21	-0.255885	0.235	0.568	8.17364e-18	oocyte	PURB-E
6.03861e-21	-0.354955	0.235	0.526	8.36348e-18	oogonia_meiosis	NOBOX-E
6.16532e-21	-0.0965357	0.215	0.583	8.53897e-18	oocyte	ZNF451-E
6.17848e-21	-0.0794764	0.195	0.526	8.55719e-18	oocyte	ZBTB25-E
6.52963e-21	-0.145427	0.205	0.532	9.04353e-18	oocyte	ZNF292-E
6.6798e-21	0.438455	0.81	0.523	9.25153e-18	FGC_mitotic	ZNF34-E
6.74325e-21	-0.38081	0.195	0.532	9.33941e-18	oocyte	DMAP1-E
6.86655e-21	-0.493055	0.21	0.53	9.51017e-18	oocyte	ZBTB48-E
7.06773e-21	0.578956	0.81	0.385	9.78881e-18	oocyte	NR1I3-D
7.27004e-21	-0.0807085	0.22	0.561	1.0069e-17	oocyte	ZNF18-E
7.4174e-21	-0.778247	0.155	0.483	1.02731e-17	oogonia_meiosis	ZNF835-E
7.44876e-21	-0.45105	0.265	0.567	1.03165e-17	oocyte	GATAD1-C
7.5446e-21	-0.205794	0.22	0.522	1.04493e-17	oocyte	ZNF10-E
8.06276e-21	0.506585	0.835	0.468	1.11669e-17	PGC	JARID2-D
8.34374e-21	-0.642296	0.275	0.565	1.15561e-17	FGC_mitotic	RBPJ-B
8.49054e-21	-0.802454	0.235	0.527	1.17594e-17	oogonia_STRA8	KLF2-B
8.5e-21	-0.123988	0.225	0.56	1.17725e-17	oocyte	ZNF420-E
8.54691e-21	0.664673	0.71	0.426	1.18375e-17	PGC_mitotic	ZNF816-E
8.63341e-21	-0.422215	0.265	0.545	1.19573e-17	oogonia_meiosis	LBX1-E
8.72875e-21	-0.536292	0.23	0.517	1.20893e-17	oogonia_meiosis	ARID1A-C
8.77496e-21	-0.85591	0.205	0.482	1.21533e-17	oogonia_STRA8	DNMT3A-D
8.82138e-21	0.535776	0.765	0.499	1.22176e-17	PGC_mitotic	PAX6-B
9.61842e-21	0.481098	0.82	0.462	1.33215e-17	oogonia_meiosis	ISX-E
9.66521e-21	-0.765172	0.26	0.502	1.33863e-17	oogonia_STRA8	BATF-C
9.93077e-21	-0.523465	0.255	0.593	1.37541e-17	oocyte	ZNF777-E
9.9752e-21	-0.397784	0.245	0.544	1.38156e-17	oocyte	TSC22D4-D
1.00117e-20	-0.893727	0.25	0.538	1.38662e-17	oogonia_meiosis	BATF2-E
1.00719e-20	0.666623	0.735	0.428	1.39496e-17	oogonia_STRA8	ZNF781-E
1.01258e-20	-0.932417	0.155	0.49	1.40242e-17	oocyte	NFKBID-E
1.03492e-20	0.905601	0.72	0.407	1.43336e-17	oogonia_STRA8	ZFP41-E
1.03608e-20	-0.789823	0.185	0.558	1.43497e-17	PGC_mitotic	MEOX2-E
1.05354e-20	-0.245789	0.195	0.516	1.45915e-17	oocyte	ZNF587-E
1.11435e-20	-0.0157168	0.215	0.546	1.54338e-17	oogonia_meiosis	ZNF699-E
1.14093e-20	-0.954381	0.185	0.536	1.58019e-17	oocyte	ZBTB47-E
1.16332e-20	-0.981551	0.17	0.508	1.61119e-17	oocyte	GLIS2-E
1.16402e-20	0.704916	0.8	0.451	1.61216e-17	oocyte	RCOR3-E
1.26881e-20	-0.925445	0.195	0.49	1.7573e-17	FGC_mitotic	TLX1-E
1.2751e-20	-0.228023	0.215	0.546	1.76602e-17	oocyte	ZNF699-E
1.28619e-20	0.574738	0.745	0.432	1.78137e-17	PGC	MITF-AA
1.32833e-20	0.619715	0.715	0.424	1.83973e-17	pre-spermatogonia	ZSCAN4-E
1.40709e-20	-0.585991	0.28	0.598	1.94882e-17	PGC_mitotic	ZC3H8-D
1.41597e-20	0.466678	0.78	0.458	1.96112e-17	oogonia_meiosis	NFATC3-D
1.41809e-20	0.442504	0.815	0.526	1.96406e-17	FGC_mitotic	ZNF787-E
1.42478e-20	-0.188812	0.225	0.563	1.97333e-17	oogonia_meiosis	ZNF180-E
1.44042e-20	-0.489973	0.27	0.591	1.99498e-17	oocyte	HLF-E
1.4484e-20	0.616553	0.755	0.452	2.00603e-17	PGC_mitotic	PPARD-A
1.47059e-20	-0.345081	0.24	0.517	2.03677e-17	oogonia_meiosis	VAX1-E
1.47059e-20	-0.345081	0.24	0.517	2.03677e-17	oogonia_meiosis	VAX2-E
1.48476e-20	-0.90867	0.185	0.478	2.05639e-17	FGC_mitotic	YBX3-E
1.52694e-20	-0.0782469	0.215	0.515	2.11481e-17	oocyte	ZNF626-E
1.54015e-20	-0.941942	0.225	0.495	2.13311e-17	PGC_mitotic	ZNF660-E
1.63293e-20	0.688956	0.76	0.442	2.2616e-17	oogonia_STRA8	E4F1-E
1.75612e-20	-0.675771	0.25	0.576	2.43223e-17	oocyte	TGIF1-E
1.77452e-20	-0.994927	0.21	0.51	2.45771e-17	oogonia_meiosis	NFYC-C
1.8313e-20	-0.451166	0.24	0.522	2.53635e-17	oogonia_meiosis	ZNF232-E
1.85053e-20	0.456511	0.815	0.502	2.56299e-17	PGC_mitotic	ZBTB21-E
1.86521e-20	0.485037	0.81	0.524	2.58332e-17	PGC_mitotic	HEYL-E
1.89428e-20	0.710612	0.705	0.463	2.62358e-17	PGC_mitotic	NFYA-A
1.91316e-20	0.60354	0.735	0.455	2.64973e-17	PGC_mitotic	ZNF212-E
1.91935e-20	-0.884278	0.205	0.478	2.6583e-17	FGC_mitotic	IKZF3-E
1.93918e-20	0.654295	0.805	0.466	2.68576e-17	oocyte	ZNF91-E
1.96291e-20	-0.538536	0.22	0.531	2.71864e-17	oocyte	ZGLP1-E
2.01867e-20	-0.730391	0.235	0.586	2.79586e-17	pre-spermatogonia	CREB5-A
2.02578e-20	0.749702	0.735	0.412	2.80571e-17	PGC_mitotic	JDP2-E
2.02704e-20	0.989718	0.71	0.418	2.80746e-17	oogonia_STRA8	EBF4-E
2.07219e-20	0.459529	0.785	0.537	2.86998e-17	FGC_mitotic	ZFP69B-E
2.10813e-20	-0.536484	0.225	0.518	2.91975e-17	oocyte	ZNF500-E
2.11989e-20	-0.133685	0.245	0.547	2.93605e-17	oogonia_meiosis	HIVEP1-E
2.15465e-20	-0.0229505	0.21	0.566	2.98419e-17	oocyte	ZNF180-E
2.17991e-20	-0.272305	0.225	0.526	3.01917e-17	oogonia_meiosis	ALX3-E
2.2601e-20	0.623792	0.685	0.394	3.13024e-17	FGC_mitotic	NR0B1-B
2.32217e-20	-0.133122	0.195	0.546	3.21621e-17	oocyte	ZNF471-E
2.33615e-20	0.536048	0.765	0.463	3.23557e-17	PGC_mitotic	GABPA-C
2.34546e-20	-0.257694	0.26	0.564	3.24846e-17	oogonia_meiosis	TAF1-C
2.36977e-20	-0.795463	0.23	0.545	3.28214e-17	FGC_mitotic	IRX4-E
2.42262e-20	0.718986	0.75	0.464	3.35533e-17	oocyte	HAND2-E
2.47999e-20	-0.249912	0.225	0.542	3.43479e-17	oocyte	ZKSCAN2-E
2.52665e-20	0.674937	0.775	0.442	3.4994e-17	oogonia_meiosis	ZNF268-E
2.53241e-20	0.53552	0.74	0.47	3.50739e-17	PGC_mitotic	ZBTB12-E
2.57362e-20	-0.0756181	0.205	0.557	3.56447e-17	oogonia_meiosis	ZSCAN29-E
2.57681e-20	0.507318	0.77	0.471	3.56888e-17	PGC_mitotic	ZNF350-E
2.60873e-20	-0.657119	0.225	0.54	3.61309e-17	oogonia_STRA8	PRDM16-E
2.64013e-20	-0.838522	0.24	0.508	3.65658e-17	oogonia_STRA8	GRHL1-E
2.72121e-20	-0.793307	0.285	0.542	3.76887e-17	oogonia_STRA8	MEOX2-E
2.72786e-20	-0.124368	0.19	0.512	3.77809e-17	oocyte	ZNF443-E
2.79952e-20	-0.881174	0.205	0.509	3.87734e-17	oocyte	MYBL2-C
2.83687e-20	-0.189775	0.215	0.556	3.92907e-17	oocyte	ZNF583-E
2.87204e-20	-0.25535	0.21	0.526	3.97777e-17	oocyte	ZBTB34-E
2.90171e-20	-0.864784	0.225	0.486	4.01887e-17	oogonia_STRA8	NANOG-A
2.94977e-20	0.586174	0.71	0.45	4.08543e-17	pre-spermatogonia	NKX3-2-E
3.01774e-20	-0.622016	0.245	0.563	4.17956e-17	oocyte	ZBTB22-E
3.04838e-20	-0.13303	0.23	0.585	4.22201e-17	oocyte	IKZF5-E
3.05645e-20	0.633454	0.745	0.421	4.23318e-17	PGC_mitotic	NEUROD1-C
3.0788e-20	-0.934546	0.2	0.517	4.26414e-17	oocyte	MEIS3-E
3.22165e-20	-0.774187	0.255	0.514	4.46198e-17	PGC_mitotic	ARNT2-E
3.30869e-20	0.52999	0.755	0.523	4.58254e-17	FGC_mitotic	ZNF267-E
3.41723e-20	0.406143	0.815	0.539	4.73287e-17	PGC	PRDM5-E
3.44178e-20	-0.0327449	0.2	0.51	4.76687e-17	oocyte	ZNF248-E
3.51775e-20	-0.438805	0.235	0.573	4.87208e-17	oocyte	ZNF836-E
3.5269e-20	-0.492473	0.24	0.56	4.88475e-17	oocyte	ZNF341-E
3.55483e-20	0.613826	0.715	0.405	4.92344e-17	oogonia_STRA8	ZNF30-E
3.55841e-20	0.0325786	0.245	0.555	4.9284e-17	oogonia_meiosis	FOXJ3-E
3.65479e-20	0.750859	0.7	0.419	5.06188e-17	pre-spermatogonia	DMRT3-E
3.79461e-20	-0.0288698	0.21	0.546	5.25553e-17	oocyte	ZNF623-E
3.81598e-20	-0.187562	0.255	0.562	5.28513e-17	oocyte	ZNF569-E
3.84305e-20	-0.700919	0.3	0.569	5.32263e-17	PGC_mitotic	ZNF746-E
3.95167e-20	0.9596	0.675	0.389	5.47306e-17	PGC_mitotic	ELK1-AA
4.22893e-20	-0.742055	0.265	0.583	5.85706e-17	PGC	HOXC11-D
4.32511e-20	0.118893	0.235	0.551	5.99027e-17	oogonia_meiosis	ZBTB44-E
4.36275e-20	0.592695	0.74	0.44	6.04241e-17	PGC_mitotic	RREB1-E
4.41094e-20	-0.804606	0.185	0.512	6.10915e-17	oogonia_meiosis	TBX5-E
4.41377e-20	0.417103	0.83	0.513	6.11307e-17	FGC_mitotic	ZNF524-E
4.42319e-20	-0.783669	0.235	0.552	6.12611e-17	FGC_mitotic	ZNF300-E
4.47833e-20	-0.421121	0.235	0.526	6.20249e-17	oogonia_meiosis	HMX2-E
4.49977e-20	0.549845	0.755	0.498	6.23218e-17	FGC_mitotic	KLF11-E
4.55029e-20	0.434804	0.825	0.559	6.30215e-17	FGC_mitotic	PSPC1-E
4.67503e-20	0.649774	0.715	0.426	6.47492e-17	pre-spermatogonia	FOXL1-E
4.73074e-20	-0.825117	0.23	0.488	6.55207e-17	oogonia_STRA8	TFAP4-C
4.90831e-20	0.741972	0.7	0.399	6.79801e-17	pre-spermatogonia	MAFF-C
5.02505e-20	-0.773267	0.23	0.557	6.9597e-17	PGC_mitotic	IRX6-E
5.19277e-20	-0.831793	0.2	0.517	7.19199e-17	oogonia_meiosis	HOXA7-E
5.19308e-20	0.720124	0.685	0.45	7.19242e-17	FGC_mitotic	FOXO6-D
5.21538e-20	-0.646234	0.25	0.512	7.2233e-17	oocyte	PAX9-E
5.24196e-20	0.624875	0.745	0.456	7.26011e-17	PGC	BATF2-E
5.26418e-20	-1.07904	0.185	0.487	7.29089e-17	oogonia_meiosis	PBX3-C
5.28202e-20	-1.10762	0.155	0.464	7.31559e-17	pre-spermatogonia	E2F2-A
5.38711e-20	-0.739905	0.275	0.542	7.46114e-17	FGC_mitotic	MLXIPL-E
5.42032e-20	-0.371122	0.215	0.541	7.50714e-17	oogonia_meiosis	ZNF582-E
5.56502e-20	0.0050556	0.185	0.51	7.70755e-17	oocyte	ZNF518A-E
5.85668e-20	-0.901009	0.21	0.488	8.11151e-17	FGC_mitotic	ZBTB4-E
5.96654e-20	0.629095	0.765	0.5	8.26366e-17	oogonia_STRA8	ZNF784-E
5.96677e-20	0.628335	0.72	0.428	8.26398e-17	PGC	NKX3-1-D
6.07679e-20	0.506199	0.815	0.499	8.41636e-17	FGC_mitotic	KAT6A-E
6.12876e-20	0.489934	0.8	0.502	8.48833e-17	FGC_mitotic	MEF2D-E
6.14942e-20	0.00884863	0.245	0.578	8.51695e-17	oogonia_meiosis	ZNF451-E
6.15269e-20	0.535148	0.785	0.471	8.52147e-17	oocyte	HOXC8-E
6.16267e-20	0.405767	0.85	0.562	8.5353e-17	FGC_mitotic	PHF5A-E
6.27026e-20	-0.909285	0.18	0.502	8.68432e-17	PGC_mitotic	ZBTB32-E
6.35749e-20	-0.777039	0.25	0.539	8.80512e-17	PGC	ATF1-A
6.39732e-20	-0.357454	0.205	0.498	8.86028e-17	oocyte	ZNF764-E
6.43823e-20	-0.571028	0.19	0.503	8.91695e-17	oocyte	ZNF512B-E
6.48291e-20	-0.266542	0.265	0.61	8.97883e-17	oocyte	ZNF483-E
6.57989e-20	0.614326	0.725	0.486	9.11315e-17	pre-spermatogonia	LHX6-E
6.63887e-20	-1.01679	0.185	0.504	9.19483e-17	oogonia_meiosis	BCL11A-C
6.70081e-20	0.689273	0.705	0.423	9.28062e-17	PGC_mitotic	ZNF230-E
6.7247e-20	0.618225	0.725	0.445	9.3137e-17	pre-spermatogonia	MEOX1-E
6.84504e-20	0.564335	0.77	0.415	9.48038e-17	oogonia_STRA8	USF2-AA
6.90392e-20	0.714531	0.715	0.415	9.56193e-17	pre-spermatogonia	PDX1-C
7.17608e-20	-0.237657	0.22	0.523	9.93887e-17	oogonia_meiosis	ZNF528-E
7.31053e-20	-0.760575	0.18	0.502	1.01251e-16	oogonia_meiosis	PBX2-C
7.50316e-20	0.741221	0.685	0.413	1.03919e-16	oogonia_STRA8	ZNF425-E
7.58748e-20	0.522696	0.785	0.452	1.05087e-16	oogonia_STRA8	TBX18-E
7.74164e-20	-0.655552	0.255	0.561	1.07222e-16	PGC_mitotic	SPDEF-B
7.74705e-20	0.658069	0.71	0.425	1.07297e-16	PGC_mitotic	MYBL2-C
7.89475e-20	0.537679	0.77	0.471	1.09342e-16	oogonia_meiosis	MXD1-E
8.05021e-20	0.749517	0.72	0.416	1.11495e-16	FGC_mitotic	TEAD3-D
8.32456e-20	-0.802448	0.265	0.551	1.15295e-16	PGC_mitotic	FOXA3-E
8.63952e-20	0.0409968	0.235	0.555	1.19657e-16	oogonia_meiosis	BBX-E
8.84351e-20	0.387205	0.825	0.539	1.22483e-16	FGC_mitotic	NFKBIL1-E
8.86801e-20	-0.468854	0.235	0.559	1.22822e-16	oocyte	CUX2-E
8.99557e-20	0.601596	0.77	0.456	1.24589e-16	FGC_mitotic	FOXI1-E
9.17279e-20	0.636094	0.74	0.412	1.27043e-16	PGC	HIVEP3-E
9.61492e-20	-0.951813	0.21	0.525	1.33167e-16	oocyte	HIF1A-AA
9.76917e-20	0.591942	0.755	0.441	1.35303e-16	oogonia_STRA8	ZNF667-E
9.88318e-20	0.571118	0.775	0.472	1.36882e-16	oocyte	DLX5-E
1.01275e-19	-0.330365	0.25	0.534	1.40266e-16	oogonia_meiosis	FOXB1-E
1.05784e-19	-0.917091	0.19	0.517	1.46511e-16	PGC_mitotic	HNF4A-AA
1.08831e-19	0.712349	0.72	0.568	1.5073e-16	oogonia_STRA8	NEUROG3-D
1.09278e-19	0.552052	0.73	0.395	1.5135e-16	oogonia_STRA8	ZNF883-E
1.11754e-19	-0.825353	0.21	0.52	1.5478e-16	oocyte	GCM2-E
1.14385e-19	-0.0668218	0.225	0.566	1.58423e-16	oocyte	ZNF260-E
1.19849e-19	0.581784	0.745	0.432	1.65991e-16	FGC_mitotic	E2F7-C
1.20832e-19	0.326893	0.855	0.539	1.67352e-16	PGC_mitotic	THAP4-E
1.21118e-19	-0.513281	0.23	0.533	1.67749e-16	oocyte	ZNF517-E
1.21876e-19	0.0716972	0.215	0.527	1.68798e-16	oocyte	ZNF585A-E
1.25511e-19	-0.349592	0.185	0.528	1.73833e-16	oogonia_meiosis	ZNF785-E
1.26254e-19	0.390275	0.82	0.566	1.74861e-16	PGC_mitotic	TOX4-E
1.28645e-19	-0.346314	0.235	0.511	1.78173e-16	oogonia_meiosis	EN2-E
1.28886e-19	-0.934238	0.285	0.487	1.78508e-16	PGC_mitotic	ZNF273-E
1.32695e-19	0.502712	0.775	0.393	1.83783e-16	FGC_mitotic	HOXA3-E
1.40184e-19	-0.745373	0.23	0.56	1.94155e-16	PGC_mitotic	ISX-E
1.41126e-19	-0.931809	0.185	0.52	1.9546e-16	oogonia_meiosis	NFKBIZ-E
1.42791e-19	-0.738324	0.28	0.583	1.97766e-16	oocyte	ZNF771-E
1.43475e-19	0.428936	0.81	0.517	1.98713e-16	PGC	ZNF595-E
1.44835e-19	-0.0801768	0.195	0.51	2.00596e-16	oocyte	ZSCAN12-E
1.46979e-19	0.574907	0.74	0.472	2.03566e-16	PGC	ATF6-A
1.48325e-19	0.439448	0.805	0.462	2.0543e-16	PGC_mitotic	ZNF134-E
1.58642e-19	-0.197713	0.215	0.532	2.19719e-16	oogonia_meiosis	ZNF708-E
1.58969e-19	0.837552	0.685	0.415	2.20172e-16	oocyte	TCF3-B
1.68097e-19	-0.747684	0.205	0.51	2.32814e-16	oocyte	PLAGL2-E
1.71684e-19	-0.102932	0.2	0.512	2.37783e-16	oocyte	ZNF445-E
1.72739e-19	-0.245022	0.21	0.516	2.39243e-16	oocyte	ZNF573-E
1.75339e-19	-0.743656	0.265	0.569	2.42845e-16	oogonia_STRA8	TBX2-E
1.76541e-19	0.568574	0.755	0.488	2.44509e-16	oogonia_STRA8	HOXB9-E
1.79517e-19	-0.910708	0.24	0.526	2.48631e-16	oocyte	KLF5-B
1.81012e-19	-0.390217	0.22	0.527	2.50702e-16	oogonia_meiosis	HOXD9-E
1.81169e-19	-0.283673	0.22	0.516	2.50919e-16	oogonia_meiosis	ZNF426-E
1.89933e-19	0.615384	0.72	0.406	2.63057e-16	oogonia_STRA8	FOSL1-B
2.05866e-19	-0.874348	0.225	0.48	2.85125e-16	FGC_mitotic	ELK3-E
2.12883e-19	0.657637	0.72	0.431	2.94843e-16	PGC_mitotic	MEIS3-E
2.17113e-19	0.701564	0.69	0.419	3.00701e-16	oogonia_STRA8	ZNF273-E
2.20589e-19	0.592487	0.715	0.422	3.05516e-16	PGC_mitotic	MYCN-A
2.20954e-19	-0.0111773	0.26	0.571	3.06021e-16	oogonia_meiosis	AEBP2-E
2.25337e-19	0.544533	0.78	0.488	3.12092e-16	oogonia_meiosis	ZBTB18-E
2.28501e-19	-0.936686	0.22	0.458	3.16473e-16	PGC_mitotic	ZNF649-E
2.35721e-19	0.659966	0.74	0.462	3.26474e-16	oocyte	BCL11B-E
2.42434e-19	0.869692	0.675	0.398	3.35771e-16	oogonia_STRA8	HOXA1-D
2.4479e-19	0.585121	0.73	0.392	3.39035e-16	oogonia_STRA8	ZNF404-E
2.46653e-19	0.656912	0.745	0.47	3.41615e-16	oocyte	PKNOX2-E
2.47805e-19	-0.0103293	0.21	0.524	3.4321e-16	oocyte	ZNF619-E
2.60329e-19	-0.547095	0.265	0.556	3.60555e-16	oogonia_STRA8	MXD3-E
2.62909e-19	0.434966	0.795	0.474	3.64129e-16	oocyte	KLF13-C
2.6462e-19	0.928649	0.755	0.378	3.66498e-16	FGC_mitotic	SMAD9-E
2.6892e-19	0.529817	0.79	0.537	3.72454e-16	oogonia_STRA8	ZNF358-E
2.7028e-19	0.459227	0.805	0.496	3.74338e-16	PGC_mitotic	ZNF266-E
2.7605e-19	-0.706392	0.28	0.526	3.82329e-16	oogonia_STRA8	FOXC2-E
2.78134e-19	0.68847	0.685	0.435	3.85216e-16	pre-spermatogonia	MZF1-D
2.78696e-19	-0.935385	0.18	0.49	3.85993e-16	PGC	E2F4-AA
2.79532e-19	-0.635937	0.26	0.555	3.87152e-16	oocyte	RHOXF1-E
2.81977e-19	0.72295	0.695	0.392	3.90538e-16	PGC_mitotic	ZIK1-E
2.86339e-19	-0.208321	0.27	0.606	3.96579e-16	oocyte	ZNF664-E
3.06124e-19	-0.18449	0.22	0.579	4.23982e-16	oogonia_meiosis	ZNF7-E
3.08521e-19	0.443753	0.75	0.441	4.27302e-16	PGC_mitotic	NFYB-B
3.18482e-19	0.445573	0.79	0.547	4.41098e-16	FGC_mitotic	ZFP42-E
3.19311e-19	-0.73097	0.285	0.552	4.42246e-16	oogonia_STRA8	ZFPM2-E
3.31834e-19	0.0843639	0.195	0.525	4.59589e-16	oocyte	ZNF234-E
3.34905e-19	0.101076	0.24	0.557	4.63844e-16	oogonia_meiosis	PRDM2-E
3.42682e-19	-0.542601	0.205	0.485	4.74614e-16	oogonia_meiosis	ZNF646-E
3.46996e-19	0.664395	0.71	0.448	4.8059e-16	PGC_mitotic	ZIC1-E
3.51524e-19	0.401721	0.79	0.494	4.86861e-16	PGC_mitotic	ZNF286A-E
3.52976e-19	0.39904	0.8	0.506	4.88872e-16	FGC_mitotic	THAP8-E
3.66076e-19	-0.186707	0.245	0.594	5.07016e-16	oocyte	KAT6A-E
3.70953e-19	0.700655	0.735	0.485	5.1377e-16	oogonia_STRA8	POU6F1-E
3.8765e-19	-0.387624	0.245	0.536	5.36895e-16	oogonia_meiosis	GSX2-E
4.03649e-19	-0.511417	0.235	0.578	5.59054e-16	oocyte	ZBED3-E
4.08687e-19	0.533669	0.725	0.441	5.66031e-16	FGC_mitotic	NFIA-D
4.16864e-19	-0.886538	0.195	0.474	5.77357e-16	FGC_mitotic	HNF1A-AA
4.19385e-19	0.51382	0.735	0.462	5.80848e-16	pre-spermatogonia	EMX1-E
4.20343e-19	0.472658	0.775	0.505	5.82175e-16	FGC_mitotic	ZFPM1-E
4.31256e-19	0.452201	0.78	0.517	5.9729e-16	PGC_mitotic	SOX7-E
4.31685e-19	1.10245	0.64	0.422	5.97884e-16	pre-spermatogonia	KLF3-C
4.38774e-19	0.813491	0.765	0.488	6.07703e-16	oogonia_STRA8	GLI2-A
4.43788e-19	-0.186155	0.205	0.542	6.14646e-16	oocyte	ZNF484-E
4.47282e-19	0.420154	0.8	0.508	6.19485e-16	FGC_mitotic	NRL-E
4.51876e-19	-0.0662608	0.255	0.581	6.25849e-16	oogonia_meiosis	ZNF354A-E
4.58046e-19	-1.09858	0.2	0.486	6.34394e-16	PGC_mitotic	FIGLA-B
4.58704e-19	-0.933707	0.185	0.48	6.35306e-16	PGC_mitotic	NKX2-2-E
4.62124e-19	0.561429	0.79	0.467	6.40041e-16	oogonia_meiosis	POU3F2-D
4.84476e-19	0.149517	0.19	0.523	6.70999e-16	oocyte	ZNF84-E
4.89806e-19	-0.219636	0.285	0.555	6.78381e-16	oogonia_meiosis	ARID2-C
4.93638e-19	-0.993284	0.185	0.501	6.83688e-16	oocyte	E2F3-A
5.04124e-19	-0.0125018	0.215	0.537	6.98212e-16	oocyte	ZNF567-E
5.04431e-19	-0.134182	0.255	0.583	6.98637e-16	oogonia_meiosis	ADNP2-E
5.04913e-19	0.040256	0.23	0.569	6.99305e-16	oogonia_meiosis	PURB-E
5.07343e-19	-0.0764237	0.215	0.538	7.0267e-16	oogonia_meiosis	ZFP28-E
5.29293e-19	-0.525377	0.285	0.537	7.33071e-16	oogonia_STRA8	ZNF540-E
5.31014e-19	0.461322	0.78	0.462	7.35454e-16	oogonia_meiosis	ZEB1-B
5.31126e-19	-0.0768302	0.21	0.533	7.3561e-16	oocyte	ZNF510-E
5.40253e-19	-0.328297	0.24	0.545	7.4825e-16	oogonia_meiosis	ZNF460-E
5.42202e-19	-0.609289	0.29	0.572	7.5095e-16	FGC_mitotic	ZHX2-C
5.64997e-19	-0.464864	0.205	0.515	7.8252e-16	oogonia_meiosis	ZNF549-E
5.70829e-19	0.579712	0.795	0.527	7.90599e-16	pre-spermatogonia	TSHZ3-E
6.10737e-19	0.402542	0.79	0.451	8.4587e-16	PGC_mitotic	ZNF165-D
6.25126e-19	-0.0636708	0.23	0.54	8.658e-16	oogonia_meiosis	ZNF471-E
6.36932e-19	0.582465	0.75	0.481	8.82151e-16	oogonia_meiosis	NCOR1-C
6.49139e-19	-0.875502	0.235	0.543	8.99058e-16	oogonia_meiosis	MAF-C
6.52422e-19	0.0172639	0.18	0.496	9.03604e-16	oocyte	ZNF662-E
6.55014e-19	0.600272	0.765	0.373	9.07194e-16	oocyte	FOXN3-E
6.63435e-19	0.499175	0.755	0.491	9.18858e-16	FGC_mitotic	FOXK1-D
6.73093e-19	0.44715	0.785	0.471	9.32234e-16	PGC_mitotic	GLIS3-E
6.89323e-19	0.600481	0.78	0.462	9.54712e-16	oogonia_meiosis	ZNF300-E
6.90265e-19	-0.805238	0.17	0.502	9.56018e-16	PGC	ZIC5-E
6.90265e-19	-0.855187	0.295	0.485	9.56018e-16	oogonia_STRA8	TEAD4-C
6.93979e-19	0.619881	0.785	0.416	9.61161e-16	PGC	IRF8-C
6.96424e-19	0.455506	0.79	0.501	9.64547e-16	PGC_mitotic	ZNF562-E
6.97097e-19	-0.849559	0.19	0.557	9.6548e-16	PGC	NR4A2-B
7.04387e-19	-0.920024	0.22	0.52	9.75576e-16	oocyte	E2F7-C
7.04696e-19	0.506686	0.73	0.488	9.76004e-16	PGC_mitotic	ZNF408-E
7.0686e-19	-0.848359	0.22	0.498	9.79001e-16	FGC_mitotic	SALL3-E
7.18989e-19	-0.726203	0.23	0.523	9.95799e-16	oogonia_STRA8	MSC-B
7.50421e-19	-0.653386	0.29	0.571	1.03933e-15	oogonia_STRA8	PRDM14-B
7.55104e-19	-0.266788	0.24	0.562	1.04582e-15	oocyte	NR2E3-E
7.6451e-19	0.385879	0.79	0.522	1.05885e-15	PGC_mitotic	KDM5A-D
7.77921e-19	0.488581	0.765	0.448	1.07742e-15	PGC_mitotic	ZNF57-E
7.8e-19	0.636177	0.77	0.457	1.0803e-15	oocyte	ZNF540-E
7.88616e-19	-0.874485	0.18	0.526	1.09223e-15	oogonia_meiosis	MITF-AA
8.02749e-19	0.556625	0.76	0.506	1.11181e-15	oogonia_STRA8	THAP3-E
8.08592e-19	-0.282944	0.21	0.535	1.1199e-15	oogonia_meiosis	ZNF652-E
8.15145e-19	-0.480231	0.255	0.567	1.12898e-15	oocyte	ZNF408-E
8.25532e-19	-0.809436	0.185	0.498	1.14336e-15	oogonia_meiosis	TP73-C
8.52569e-19	0.53495	0.73	0.429	1.18081e-15	PGC	NFKBIZ-E
8.55668e-19	-0.0338975	0.2	0.529	1.1851e-15	oocyte	ZNF169-E
8.78857e-19	-0.345964	0.21	0.502	1.21722e-15	oocyte	ZNF555-E
8.78881e-19	-0.51234	0.285	0.607	1.21725e-15	FGC_mitotic	ZNF93-E
8.92553e-19	-0.899111	0.22	0.547	1.23619e-15	oogonia_meiosis	STAT1-AA
8.95856e-19	-0.608441	0.245	0.611	1.24076e-15	oocyte	ZNF524-E
9.10235e-19	-0.726696	0.265	0.545	1.26067e-15	pre-spermatogonia	FOXP1-B
9.17542e-19	0.574901	0.765	0.415	1.2708e-15	oocyte	RBPJL-D
9.47428e-19	-0.0853962	0.26	0.561	1.31219e-15	oogonia_meiosis	ZNF548-E
9.47809e-19	0.592717	0.655	0.399	1.31272e-15	oogonia_STRA8	NR0B1-B
9.5612e-19	-0.916547	0.175	0.477	1.32423e-15	PGC_mitotic	LRRFIP1-E
9.77687e-19	0.795767	0.695	0.462	1.3541e-15	PGC_mitotic	MYNN-D
1.00262e-18	-0.315536	0.245	0.589	1.38862e-15	oocyte	HOXD12-E
1.01953e-18	-0.165848	0.205	0.511	1.41205e-15	oocyte	ZNF525-E
1.04595e-18	-0.247491	0.24	0.574	1.44864e-15	oocyte	ZNF518B-E
1.06769e-18	0.460512	0.77	0.435	1.47875e-15	FGC_mitotic	BACH1-B
1.13551e-18	0.593575	0.775	0.468	1.57268e-15	oogonia_STRA8	ZNF692-E
1.15825e-18	0.353591	0.855	0.534	1.60418e-15	PGC	NFKBIL1-E
1.1663e-18	0.607443	0.705	0.405	1.61533e-15	oogonia_STRA8	ZNF251-E
1.16788e-18	0.885759	0.675	0.403	1.61751e-15	PGC_mitotic	NFKBID-E
1.19823e-18	0.432276	0.805	0.497	1.65955e-15	FGC_mitotic	KMT2B-D
1.20833e-18	0.64011	0.715	0.491	1.67353e-15	FGC_mitotic	NR4A3-B
1.21945e-18	-0.538854	0.255	0.539	1.68894e-15	oogonia_meiosis	PAX2-E
1.22003e-18	-0.787291	0.255	0.562	1.68974e-15	PGC_mitotic	ZNF431-E
1.24642e-18	0.443569	0.8	0.426	1.72629e-15	oogonia_meiosis	RFXANK-A
1.24642e-18	0.443569	0.8	0.426	1.72629e-15	oogonia_meiosis	RFXAP-A
1.29215e-18	-0.130745	0.235	0.511	1.78962e-15	oogonia_meiosis	KDM2A-E
1.2972e-18	0.47231	0.795	0.51	1.79662e-15	PGC	DMRT2-E
1.30646e-18	-0.748917	0.25	0.547	1.80944e-15	pre-spermatogonia	ZBED1-C
1.3122e-18	-0.864726	0.235	0.527	1.81739e-15	oogonia_meiosis	E2F5-C
1.32029e-18	-0.784372	0.285	0.51	1.8286e-15	PGC_mitotic	ARID5A-E
1.33662e-18	-0.142946	0.245	0.557	1.85121e-15	oocyte	ARID4B-E
1.35092e-18	0.649238	0.715	0.387	1.87103e-15	oocyte	LRRFIP1-E
1.36922e-18	-0.4115	0.17	0.485	1.89637e-15	oogonia_meiosis	ZNF707-E
1.43213e-18	-0.0983565	0.23	0.556	1.9835e-15	oocyte	MIER3-E
1.43484e-18	-0.835413	0.22	0.491	1.98725e-15	FGC_mitotic	FOXN1-E
1.4534e-18	0.421134	0.84	0.54	2.01296e-15	PGC	ZNF22-E
1.47243e-18	0.713592	0.67	0.468	2.03932e-15	oogonia_STRA8	ZNF541-E
1.47373e-18	0.444545	0.785	0.513	2.04111e-15	PGC	HOPX-E
1.50343e-18	-0.245147	0.23	0.543	2.08225e-15	oogonia_meiosis	ZNF616-E
1.56162e-18	-0.730726	0.255	0.564	2.16285e-15	FGC_mitotic	KLF13-C
1.5855e-18	-0.524203	0.26	0.545	2.19592e-15	oogonia_meiosis	SPIC-E
1.59157e-18	-0.797202	0.27	0.499	2.20433e-15	oogonia_STRA8	ZNF584-D
1.62343e-18	-0.881349	0.215	0.475	2.24845e-15	FGC_mitotic	NKX2-2-E
1.68134e-18	0.580628	0.755	0.416	2.32866e-15	oocyte	ID2-E
1.6827e-18	0.433099	0.79	0.487	2.33054e-15	FGC_mitotic	ZNF414-E
1.6885e-18	-0.305285	0.2	0.539	2.33857e-15	oocyte	ZNF823-E
1.74588e-18	-0.648065	0.275	0.52	2.41804e-15	PGC	AHR-B
1.77015e-18	0.640366	0.755	0.422	2.45165e-15	oocyte	RERE-E
1.80727e-18	0.716815	0.685	0.432	2.50307e-15	pre-spermatogonia	HOXD13-E
1.83905e-18	-0.110417	0.25	0.568	2.54708e-15	oogonia_meiosis	NFXL1-E
1.84255e-18	-0.609197	0.21	0.516	2.55193e-15	oocyte	ZNF74-E
1.84779e-18	0.436225	0.755	0.471	2.55919e-15	PGC_mitotic	ZNF530-E
1.84943e-18	0.609577	0.73	0.478	2.56145e-15	pre-spermatogonia	NPAS3-E
1.84969e-18	-0.13484	0.245	0.569	2.56182e-15	oogonia_meiosis	ZNF184-E
1.88807e-18	-0.68938	0.25	0.502	2.61497e-15	PGC	USF2-AA
1.8917e-18	-0.676142	0.2	0.503	2.62e-15	oogonia_meiosis	ZNF462-E
1.99806e-18	0.554927	0.72	0.462	2.76732e-15	oocyte	OVOL1-E
2.04158e-18	0.401998	0.805	0.487	2.82758e-15	FGC_mitotic	ZNF575-E
2.09883e-18	-0.876022	0.185	0.485	2.90688e-15	FGC_mitotic	FEV-E
2.13347e-18	0.597678	0.72	0.415	2.95486e-15	oogonia_STRA8	ZNF789-E
2.13802e-18	0.528284	0.745	0.437	2.96116e-15	PGC_mitotic	ZNF189-E
2.24452e-18	0.65983	0.73	0.473	3.10866e-15	oogonia_meiosis	DLX4-E
2.25786e-18	-0.327024	0.225	0.496	3.12713e-15	oocyte	ZNF311-E
2.27001e-18	0.367828	0.81	0.526	3.14396e-15	PGC_mitotic	ZNF561-E
2.33111e-18	-0.693583	0.265	0.559	3.22859e-15	oogonia_STRA8	ZNF521-E
2.34683e-18	0.557264	0.76	0.482	3.25036e-15	pre-spermatogonia	FOXA2-B
2.3883e-18	-0.663862	0.29	0.499	3.30779e-15	FGC_mitotic	TP53-AA
2.4292e-18	0.435496	0.805	0.535	3.36444e-15	FGC_mitotic	ZNF358-E
2.49681e-18	-0.179473	0.235	0.572	3.45809e-15	oogonia_meiosis	ZNF558-E
2.55928e-18	0.734873	0.695	0.418	3.54461e-15	PGC_mitotic	ZNF552-E
2.60725e-18	0.51007	0.765	0.463	3.61104e-15	FGC_mitotic	HOXC9-E
2.66588e-18	-0.697719	0.27	0.517	3.69225e-15	pre-spermatogonia	NFIA-D
2.72172e-18	0.570357	0.745	0.443	3.76958e-15	PGC_mitotic	ZNF416-E
2.75291e-18	-0.286222	0.235	0.533	3.81279e-15	oocyte	ZNF446-E
2.76256e-18	-0.799861	0.265	0.552	3.82615e-15	oogonia_STRA8	SMARCC1-D
2.80604e-18	-0.35616	0.215	0.506	3.88636e-15	oocyte	ZNF319-E
2.82662e-18	-0.472443	0.23	0.531	3.91487e-15	oocyte	E4F1-E
2.87122e-18	-0.650755	0.275	0.538	3.97664e-15	oocyte	SMAD5-C
3.0295e-18	-0.619299	0.34	0.555	4.19586e-15	oogonia_STRA8	STAT2-B
3.0326e-18	0.614185	0.75	0.486	4.20016e-15	oogonia_STRA8	MXD4-E
3.0853e-18	0.612454	0.69	0.443	4.27314e-15	PGC_mitotic	ZNF763-E
3.0865e-18	0.701681	0.7	0.436	4.2748e-15	FGC_mitotic	ETV1-C
3.25958e-18	-0.146009	0.225	0.554	4.51452e-15	oogonia_meiosis	ZNF250-E
3.27357e-18	0.582221	0.74	0.473	4.53389e-15	oogonia_STRA8	ZNF530-E
3.28848e-18	0.358594	0.83	0.516	4.55454e-15	PGC	ZNF93-E
3.32738e-18	-0.332159	0.25	0.563	4.60842e-15	oocyte	ZNF197-D
3.35771e-18	-0.460521	0.215	0.532	4.65043e-15	oogonia_meiosis	ZNF544-E
3.36578e-18	-0.311661	0.24	0.542	4.6616e-15	oocyte	TBX18-E
3.4439e-18	0.575657	0.735	0.442	4.76981e-15	oogonia_STRA8	FOXO6-D
3.60556e-18	0.447865	0.785	0.492	4.9937e-15	PGC_mitotic	ZNF845-E
3.65339e-18	-0.430555	0.21	0.511	5.05994e-15	oogonia_meiosis	ZNF516-E
3.70521e-18	-0.748203	0.275	0.548	5.13172e-15	oogonia_meiosis	SRF-A
3.99612e-18	0.113413	0.25	0.556	5.53462e-15	oogonia_meiosis	ARID4B-E
4.04771e-18	0.635509	0.715	0.449	5.60608e-15	PGC_mitotic	ZNF544-E
4.0611e-18	0.580555	0.69	0.429	5.62463e-15	PGC	SOX13-C
4.11162e-18	0.437263	0.77	0.522	5.69459e-15	FGC_mitotic	ZFP1-E
4.12959e-18	-0.29008	0.22	0.498	5.71948e-15	oocyte	ZNF681-E
4.15671e-18	0.561558	0.73	0.418	5.75705e-15	PGC	HIC1-B
4.23077e-18	-0.382033	0.26	0.589	5.85961e-15	oocyte	THAP3-E
4.31143e-18	0.560376	0.76	0.509	5.97133e-15	FGC_mitotic	HLF-E
4.41925e-18	0.454117	0.795	0.53	6.12066e-15	FGC_mitotic	ZNF800-E
4.41928e-18	0.497636	0.765	0.527	6.12071e-15	oogonia_STRA8	THAP7-E
4.4204e-18	-0.058553	0.22	0.545	6.12225e-15	oocyte	ZNF254-E
4.44572e-18	-0.0682426	0.195	0.483	6.15732e-15	oocyte	ZNF23-E
4.47874e-18	-0.344521	0.24	0.542	6.20305e-15	oogonia_meiosis	TBX18-E
4.50931e-18	0.457459	0.775	0.476	6.2454e-15	PGC_mitotic	ZNF197-D
4.53079e-18	0.391252	0.8	0.503	6.27514e-15	PGC_mitotic	ZNF579-E
4.57646e-18	0.537133	0.745	0.488	6.3384e-15	PGC_mitotic	ZNF687-E
4.60121e-18	-0.66688	0.26	0.54	6.37267e-15	PGC_mitotic	NPAS2-D
4.62458e-18	-0.762945	0.21	0.517	6.40505e-15	FGC_mitotic	NR5A1-AA
4.72619e-18	0.554553	0.75	0.488	6.54577e-15	PGC	TBX2-E
4.88465e-18	-0.591705	0.26	0.555	6.76525e-15	FGC_mitotic	ISX-E
4.97207e-18	0.490364	0.77	0.476	6.88631e-15	FGC_mitotic	ZNF275-E
5.07878e-18	-0.686073	0.29	0.578	7.03411e-15	oogonia_STRA8	TCF21-E
5.12109e-18	0.529543	0.69	0.432	7.09271e-15	PGC_mitotic	ZSCAN20-E
5.12481e-18	-0.755118	0.23	0.552	7.09786e-15	PGC_mitotic	CREB1-AA
5.16008e-18	-0.624042	0.29	0.559	7.14671e-15	pre-spermatogonia	FOS-AA
5.25792e-18	0.690154	0.685	0.447	7.28223e-15	FGC_mitotic	GLIS1-E
5.28518e-18	-0.704989	0.235	0.542	7.31997e-15	oocyte	PRDM6-E
5.49383e-18	0.531144	0.76	0.438	7.60895e-15	oogonia_STRA8	ZNF415-E
5.71294e-18	0.446306	0.77	0.446	7.91242e-15	PGC_mitotic	ZSCAN2-E
5.82372e-18	0.542494	0.71	0.405	8.06585e-15	PGC_mitotic	ZNF107-E
5.94081e-18	-0.242528	0.275	0.589	8.22803e-15	oocyte	ETV5-E
6.3448e-18	0.677683	0.685	0.433	8.78755e-15	PGC_mitotic	ZBTB49-E
6.44058e-18	-0.388318	0.27	0.579	8.9202e-15	oocyte	HOXA11-E
6.50444e-18	0.690798	0.64	0.383	9.00864e-15	FGC_mitotic	E2F2-A
6.58064e-18	-0.306758	0.24	0.541	9.11419e-15	oocyte	TSC22D2-E
6.65471e-18	-0.617182	0.245	0.567	9.21678e-15	FGC_mitotic	IRX5-E
6.66258e-18	-0.436241	0.21	0.497	9.22767e-15	oogonia_meiosis	ZNF764-E
6.70033e-18	-0.263685	0.25	0.546	9.27995e-15	oogonia_meiosis	ZNF597-E
6.77444e-18	-1.00973	0.19	0.521	9.3826e-15	oogonia_meiosis	RELB-C
6.78605e-18	0.633221	0.695	0.398	9.39868e-15	PGC	PPARG-AA
6.80025e-18	0.643378	0.745	0.468	9.41834e-15	oogonia_STRA8	ZNF219-E
6.82877e-18	-0.753627	0.23	0.589	9.45784e-15	PGC_mitotic	HOXC11-D
6.86412e-18	-0.185899	0.235	0.557	9.50681e-15	oocyte	ZBTB43-E
7.11248e-18	0.540776	0.725	0.406	9.85078e-15	PGC	KLF15-E
7.14696e-18	-0.813454	0.285	0.494	9.89854e-15	PGC	TCF7L1-D
7.35553e-18	0.646464	0.79	0.44	1.01874e-14	oocyte	ZNF174-E
7.36015e-18	-0.672194	0.25	0.532	1.01938e-14	oogonia_STRA8	TSC22D3-E
7.43317e-18	0.50551	0.745	0.437	1.02949e-14	oocyte	ZBTB7B-E
7.70324e-18	-0.485204	0.24	0.577	1.0669e-14	oocyte	HOXA2-E
7.73128e-18	0.487434	0.735	0.458	1.07078e-14	FGC_mitotic	ISL2-E
7.82151e-18	-0.870486	0.23	0.488	1.08328e-14	PGC_mitotic	ERF-E
7.83163e-18	0.713111	0.73	0.439	1.08468e-14	oogonia_STRA8	HOXB4-E
7.83202e-18	-0.730576	0.275	0.563	1.08473e-14	FGC_mitotic	MXI1-C
7.89467e-18	0.522845	0.76	0.532	1.09341e-14	oogonia_STRA8	ZNF34-E
7.96077e-18	0.686812	0.77	0.447	1.10257e-14	oogonia_meiosis	ZBTB1-E
8.11619e-18	-0.336701	0.235	0.557	1.12409e-14	oocyte	ZNF134-E
8.24443e-18	0.389753	0.775	0.458	1.14185e-14	FGC_mitotic	GLI4-E
[truncated: 7,696 more rows]

## Sheet: 3_TFact_fromsnATAC_germcells
p_val	avg_log2FC	pct.1	pct.2	p_val_adj	cluster	TFmotif
0	17.0014	0.874	0.071	0	PGC	TFAP2C.MA0524.2
0	16.5766	0.883	0.068	0	PGC	TFAP2B.MA0811.1
0	15.9444	0.853	0.084	0	PGC	TFAP2C(var.2).MA0814.1
0	15.7082	0.884	0.072	0	PGC	TFAP2A(var.2).MA0810.1
0	15.4162	0.91	0.082	0	PGC	AP2A-HUMAN.H10MO.C
0	15.3057	0.873	0.081	0	PGC	AP2C-HUMAN.H10MO.A
0	15.0914	0.87	0.084	0	PGC	TFAP2A.MA0003.3
0	14.8123	0.872	0.084	0	PGC	TFAP2B(var.2).MA0812.1
0	11.7683	0.83	0.101	0	PGC	TFAP2B(var.3).MA0813.1
0	8.05374	0.874	0.1	0	PGC	EBF1.SwissRegulon
0	6.8554	0.877	0.115	0	PGC	EBF1.HOMER
0	-7.91358	0.091	0.786	0	PGC	NRF1.MA0506.1
0	-9.32214	0.08	0.813	0	PGC	AHR.SwissRegulon
0	-9.32214	0.08	0.813	0	PGC	ARNT2.SwissRegulon
0	-14.2802	0.052	0.822	0	PGC	TFDP1.SwissRegulon
0	-19.1033	0.033	0.799	0	PGC	DMRT6.HOMER
0	-25.4206	0.03	0.697	0	PGC	NFYC.SwissRegulon
4.94066e-324	-8.60557	0.064	0.748	9.48606e-321	PGC	THAP1-HUMAN.H10MO.D
3.20846e-320	-34.7631	0.028	0.683	6.16025e-317	PGC	NFYB.MA0502.1
4.00692e-319	-36.4359	0.028	0.674	7.69329e-316	PGC	NFYA-HUMAN.H10MO.A
1.02567e-318	-9.63878	0.062	0.751	1.96929e-315	PGC	NRF1-HUMAN.H10MO.A
9.05108e-318	-8.21062	0.091	0.767	1.73781e-314	PGC	NRF.HOMER
3.19054e-317	-36.6864	0.029	0.675	6.12583e-314	PGC	NFYA.SwissRegulon
3.41397e-316	-36.9179	0.029	0.681	6.55483e-313	PGC	CEBPZ.SwissRegulon
4.85325e-315	6.21272	0.853	0.141	9.31823e-312	PGC	COE1-HUMAN.H10MO.A
3.51972e-314	-8.75152	0.079	0.753	6.75786e-311	PGC	NRF1.SwissRegulon
1.42735e-311	4.50318	0.862	0.154	2.74052e-308	PGC	EBF3.SwissRegulon
1.79396e-311	-33.1959	0.033	0.665	3.4444e-308	PGC	GBX2.SwissRegulon
2.63225e-311	-4.16101	0.095	0.79	5.05392e-308	PGC	IRX5.SwissRegulon
5.94431e-311	-41.5459	0.023	0.661	1.14131e-307	PGC	HXA5-HUMAN.H10MO.D
9.49317e-311	-32.6612	0.032	0.667	1.82269e-307	PGC	FOXI1-HUMAN.H10MO.B
1.58561e-309	-17.7415	0.037	0.684	3.04436e-306	PGC	MEIS1.MA0498.2
1.58561e-309	-17.7415	0.037	0.684	3.04436e-306	PGC	MEIS2.SwissRegulon
4.05963e-309	-39.9959	0.028	0.673	7.7945e-306	PGC	NFYA.MA0060.3
3.01323e-307	-18.1656	0.04	0.691	5.78539e-304	PGC	HXC6-HUMAN.H10MO.D
1.46164e-306	9.68044	0.816	0.119	2.80634e-303	PGC	TFAP2C(var.3).MA0815.1
8.62168e-305	-33.9072	0.03	0.639	1.65536e-301	PGC	ZBT49-HUMAN.H10MO.D
1.13588e-302	-16.7755	0.058	0.695	2.1809e-299	PGC	FOXM1-HUMAN.H10MO.D
5.40655e-297	-15.0793	0.05	0.672	1.03806e-293	PGC	CPEB1.SwissRegulon
2.27653e-293	-20.3219	0.051	0.687	4.37094e-290	PGC	NFYB.SwissRegulon
1.30946e-292	-22.5886	0.042	0.636	2.51417e-289	PGC	BARH2-HUMAN.H10MO.D
2.00655e-292	-15.5049	0.069	0.692	3.85257e-289	PGC	GABPA-HUMAN.H10MO.A
3.74346e-292	-17.481	0.052	0.673	7.18744e-289	PGC	HXD10-HUMAN.H10MO.D
3.8456e-292	-19.614	0.042	0.65	7.38356e-289	PGC	NFATC3.SwissRegulon
3.46244e-290	9.14005	0.805	0.127	6.64788e-287	PGC	TFAP2A(var.3).MA0872.1
3.79199e-289	-16.1953	0.054	0.689	7.28062e-286	PGC	RORA(var.2).MA0072.1
3.86906e-289	-7.05818	0.09	0.759	7.42859e-286	PGC	NRF1.HOMER
1.46129e-288	-14.2491	0.07	0.673	2.80567e-285	PGC	GABPA.SwissRegulon
4.48439e-284	-39.7223	0.029	0.622	8.61003e-281	PGC	HXB6-HUMAN.H10MO.D
5.26139e-283	8.09586	0.803	0.14	1.01019e-279	PGC	TFAP2B.SwissRegulon
1.33639e-282	-33.6086	0.037	0.63	2.56587e-279	PGC	ESX1.SwissRegulon
2.3088e-282	-21.8426	0.051	0.662	4.4329e-279	PGC	NFYB-HUMAN.H10MO.A
2.97016e-281	5.77318	0.832	0.167	5.70271e-278	PGC	TFAP2E.SwissRegulon
2.52523e-280	-5.67583	0.084	0.717	4.84845e-277	PGC	PAX5-HUMAN.H10MO.A
3.75295e-280	-41.6098	0.028	0.627	7.20567e-277	PGC	EN1.SwissRegulon
1.333e-279	-19.9451	0.043	0.647	2.55936e-276	PGC	NFAC3-HUMAN.H10MO.B
3.95426e-279	8.54216	0.818	0.152	7.59218e-276	PGC	POU3F4.MA0789.1
9.76607e-279	-15.4448	0.047	0.674	1.87509e-275	PGC	MEIS2.MA0774.1
1.34093e-278	-21.8129	0.05	0.65	2.57459e-275	PGC	FOS.SwissRegulon
2.60822e-276	-19.2193	0.035	0.683	5.00778e-273	PGC	DMRT3.MA0610.1
1.52492e-275	-8.18059	0.087	0.696	2.92785e-272	PGC	HIC1.SwissRegulon
3.37716e-274	-29.2342	0.036	0.612	6.48415e-271	PGC	MSX2.SwissRegulon
7.95558e-274	-16.5342	0.08	0.702	1.52747e-270	PGC	GBX1-HUMAN.H10MO.D
3.07498e-273	-6.2153	0.1	0.731	5.90397e-270	PGC	HEY2-HUMAN.H10MO.D
8.26384e-272	-26.4151	0.052	0.649	1.58666e-268	PGC	CEBPZ-HUMAN.H10MO.D
9.29824e-272	-8.04267	0.06	0.678	1.78526e-268	PGC	EHF.HOMER
1.22718e-271	-8.07024	0.08	0.687	2.35618e-268	PGC	ZNF165.HOMER
4.80359e-271	8.09107	0.801	0.158	9.2229e-268	PGC	POU5F1B.MA0792.1
9.87832e-271	-13.5927	0.065	0.678	1.89664e-267	PGC	MEIS3.MA0775.1
1.98807e-270	-9.68114	0.072	0.661	3.81709e-267	PGC	POU1F1.SwissRegulon
6.1355e-270	-8.05955	0.089	0.733	1.17802e-266	PGC	CREB1.SwissRegulon
2.21437e-269	-22.5377	0.055	0.641	4.2516e-266	PGC	SHOX2.SwissRegulon
1.85714e-267	-10.9195	0.077	0.677	3.56571e-264	PGC	FOXO4.SwissRegulon
2.4223e-267	-6.59618	0.104	0.708	4.65081e-264	PGC	SP4.SwissRegulon
2.89416e-267	-5.96009	0.095	0.716	5.55679e-264	PGC	SOX13.SwissRegulon
3.59956e-267	-10.2256	0.068	0.698	6.91116e-264	PGC	FOXC2-HUMAN.H10MO.D
7.45219e-266	-15.0973	0.075	0.672	1.43082e-262	PGC	FOXB1.MA0845.1
3.44862e-265	-11.7416	0.07	0.682	6.62136e-262	PGC	PHOX2B.SwissRegulon
4.08662e-265	-13.5727	0.071	0.675	7.84632e-262	PGC	ERG.SwissRegulon
4.59679e-265	-11.1114	0.085	0.667	8.82584e-262	PGC	NHLH1.SwissRegulon
5.63148e-264	-12.6706	0.06	0.683	1.08124e-260	PGC	HXA9-HUMAN.H10MO.D
2.15467e-262	7.64591	0.804	0.154	4.13697e-259	PGC	PO2F1-HUMAN.H10MO.B
5.02183e-262	7.17599	0.808	0.163	9.64192e-259	PGC	POU3F1.MA0786.1
2.70233e-261	-18.4257	0.048	0.629	5.18848e-258	PGC	SPDEF.HOMER
9.07353e-261	-14.9162	0.062	0.647	1.74212e-257	PGC	ETS1.SwissRegulon
1.20672e-258	4.20788	0.824	0.192	2.3169e-255	PGC	EBF1.MA0154.3
1.72011e-258	-12.3883	0.075	0.658	3.30262e-255	PGC	HIC2.SwissRegulon
2.15332e-258	4.84688	0.798	0.188	4.13438e-255	PGC	SOX13.MA1120.1
1.33461e-257	-10.6954	0.091	0.692	2.56246e-254	PGC	TFDP1.MA1122.1
1.84835e-257	6.93789	0.816	0.168	3.54883e-254	PGC	POU3F2.MA0787.1
6.35457e-256	-8.50842	0.112	0.718	1.22008e-252	PGC	ZBTB14.SwissRegulon
1.44554e-255	5.27204	0.797	0.169	2.77544e-252	PGC	SOX15.MA1152.1
3.55856e-255	-7.77918	0.105	0.693	6.83243e-252	PGC	HOXD9.SwissRegulon
5.42815e-255	-8.49893	0.088	0.685	1.0422e-251	PGC	ELF1.SwissRegulon
2.94296e-252	-16.0512	0.07	0.668	5.65047e-249	PGC	NR1H4-HUMAN.H10MO.C
4.47273e-252	-7.34036	0.101	0.709	8.58764e-249	PGC	NKX1-2.SwissRegulon
6.22466e-252	-6.58617	0.11	0.699	1.19513e-248	PGC	ZN639-HUMAN.H10MO.D
4.32086e-251	-11.8661	0.078	0.668	8.29606e-248	PGC	GLI2.MA0734.1
1.58536e-250	3.39962	0.832	0.189	3.0439e-247	PGC	ZNF467.HOMER
6.661e-250	-7.48025	0.089	0.687	1.27891e-246	PGC	ZBTB7C.MA0695.1
1.73251e-249	-20.1807	0.053	0.647	3.32641e-246	PGC	FOXL1.SwissRegulon
5.06338e-249	-4.74471	0.102	0.684	9.72169e-246	PGC	SP4-HUMAN.H10MO.D
6.64036e-248	-10.2811	0.09	0.676	1.27495e-244	PGC	ISL2-HUMAN.H10MO.D
1.47283e-247	3.5755	0.819	0.193	2.82783e-244	PGC	EBF.HOMER
2.49727e-247	-12.7577	0.064	0.658	4.79476e-244	PGC	TFAP4-HUMAN.H10MO.C
4.07307e-246	-18.6056	0.053	0.613	7.8203e-243	PGC	HOXD10.SwissRegulon
1.67996e-245	-4.14655	0.151	0.769	3.22553e-242	PGC	IRF9.MA0653.1
2.54559e-244	-8.4321	0.092	0.678	4.88754e-241	PGC	T1ISRE.HOMER
3.25299e-244	-7.32345	0.119	0.706	6.24574e-241	PGC	E2F4.MA0470.1
3.72424e-244	-10.246	0.087	0.692	7.15055e-241	PGC	DMRT1.HOMER
3.85926e-243	-12.9217	0.069	0.658	7.40977e-240	PGC	NKX2-3.SwissRegulon
4.70037e-242	-6.15637	0.152	0.733	9.02471e-239	PGC	MYC.SwissRegulon
1.74465e-241	9.46108	0.794	0.163	3.34973e-238	PGC	TFAP2C.SwissRegulon
3.66165e-241	-3.9527	0.135	0.73	7.03037e-238	PGC	MEF2B-HUMAN.H10MO.D
4.81203e-241	-9.92974	0.104	0.676	9.23909e-238	PGC	GRE.HOMER
2.1737e-239	-6.67068	0.117	0.703	4.17351e-236	PGC	E2F1.SwissRegulon
2.52575e-238	-22.9684	0.05	0.609	4.84945e-235	PGC	GCM2-HUMAN.H10MO.D
1.44147e-236	-9.12461	0.101	0.675	2.76762e-233	PGC	FLI1-HUMAN.H10MO.A
4.81908e-236	-27.6966	0.057	0.624	9.25264e-233	PGC	HOXB2.SwissRegulon
1.53816e-235	6.98481	0.799	0.181	2.95326e-232	PGC	POU2F1.MA0785.1
4.84436e-233	-14.2707	0.09	0.641	9.30116e-230	PGC	BARX2.SwissRegulon
1.26137e-232	-6.39212	0.088	0.663	2.42182e-229	PGC	ZFX.SwissRegulon
2.4379e-232	-8.91082	0.096	0.666	4.68077e-229	PGC	ZBTB7B.MA0694.1
1.36193e-231	-3.99897	0.152	0.747	2.61491e-228	PGC	ARNT-HUMAN.H10MO.B
3.70252e-231	3.64468	0.803	0.205	7.10883e-228	PGC	ZFX.HOMER
3.41956e-230	-4.91252	0.119	0.702	6.56556e-227	PGC	CDX4.HOMER
4.25985e-230	-4.31992	0.14	0.738	8.17891e-227	PGC	FOXH1.MA0479.1
5.45464e-230	-4.87696	0.127	0.729	1.04729e-226	PGC	HIF1A.SwissRegulon
1.79498e-229	-17.4615	0.064	0.62	3.44637e-226	PGC	RAX.SwissRegulon
7.56137e-229	-9.15676	0.073	0.636	1.45178e-225	PGC	REST.MA0138.2
2.41943e-228	-4.81621	0.13	0.732	4.64531e-225	PGC	HIF1A-HUMAN.H10MO.A
1.74176e-227	-12.1251	0.087	0.642	3.34419e-224	PGC	CDC5L.SwissRegulon
2.53319e-225	-3.79248	0.124	0.68	4.86373e-222	PGC	SP2-HUMAN.H10MO.C
4.91427e-225	-8.65648	0.101	0.688	9.4354e-222	PGC	SOX12.SwissRegulon
1.5772e-223	-6.29735	0.134	0.687	3.02823e-220	PGC	EGR1.MA0162.3
2.60424e-222	-3.89423	0.17	0.766	5.00013e-219	PGC	IRF4.MA1419.1
3.63232e-222	-7.87731	0.124	0.676	6.97405e-219	PGC	HXD9-HUMAN.H10MO.D
4.18268e-222	6.18548	0.788	0.194	8.03074e-219	PGC	POU1F1.MA0784.1
1.44955e-221	-3.38005	0.145	0.724	2.78313e-218	PGC	IRX6.SwissRegulon
3.51364e-220	-3.3093	0.166	0.753	6.74618e-217	PGC	IRF1.SwissRegulon
8.0491e-220	-12.6577	0.12	0.672	1.54543e-216	PGC	TYY2-HUMAN.H10MO.D
5.66041e-219	-6.23225	0.095	0.646	1.0868e-215	PGC	ZFX-HUMAN.H10MO.C
1.13086e-218	-7.14057	0.099	0.659	2.17124e-215	PGC	RFX5-HUMAN.H10MO.A
5.85581e-218	4.62205	0.768	0.185	1.12432e-214	PGC	PO5F1-HUMAN.H10MO.A
1.97502e-216	-7.84437	0.084	0.636	3.79204e-213	PGC	ELF5.HOMER
3.17151e-216	-7.4969	0.104	0.645	6.08929e-213	PGC	EVX1-HUMAN.H10MO.D
6.59603e-216	5.53902	0.764	0.191	1.26644e-212	PGC	POU5F1.MA1115.1
3.64717e-215	3.35956	0.782	0.207	7.00257e-212	PGC	SOX3.SwissRegulon
5.91853e-215	-4.54414	0.151	0.703	1.13636e-211	PGC	MYC-HUMAN.H10MO.A
1.71574e-214	-17.5115	0.099	0.657	3.29422e-211	PGC	SHOX2-HUMAN.H10MO.D
1.95862e-214	-5.51081	0.129	0.696	3.76055e-211	PGC	CENPB.SwissRegulon
1.61577e-213	-18.3943	0.08	0.613	3.10227e-210	PGC	GBX2-HUMAN.H10MO.D
3.18087e-213	-20.7751	0.068	0.616	6.10727e-210	PGC	LHX6-HUMAN.H10MO.D
7.64055e-213	-5.79009	0.164	0.721	1.46699e-209	PGC	ELK1.MA0028.2
2.38107e-212	-14.0322	0.104	0.672	4.57165e-209	PGC	SHOX-HUMAN.H10MO.D
2.81147e-212	-4.05883	0.166	0.728	5.39803e-209	PGC	ETV6-HUMAN.H10MO.D
4.32945e-210	-3.49219	0.181	0.748	8.31255e-207	PGC	IRF8.MA0652.1
5.95663e-210	-5.68845	0.178	0.71	1.14367e-206	PGC	ETV1.MA0761.1
2.24667e-209	-5.52746	0.169	0.713	4.31361e-206	PGC	ELK3.MA0759.1
2.55303e-209	-9.58512	0.109	0.638	4.90181e-206	PGC	CPEB1-HUMAN.H10MO.D
2.62101e-209	-4.5828	0.133	0.71	5.03234e-206	PGC	REST-HUMAN.H10MO.A
1.42402e-208	-3.71246	0.171	0.725	2.73412e-205	PGC	ISRE.HOMER
3.37366e-208	-4.78032	0.163	0.689	6.47742e-205	PGC	ZBTB33.SwissRegulon
9.16357e-208	-4.30006	0.153	0.717	1.75941e-204	PGC	GFX.HOMER
2.68628e-207	-5.5574	0.15	0.683	5.15766e-204	PGC	HES1.SwissRegulon
3.65149e-207	-4.07371	0.161	0.702	7.01085e-204	PGC	ZBTB33.MA0527.1
3.93499e-207	-3.54777	0.173	0.73	7.55519e-204	PGC	HMX1-HUMAN.H10MO.D
5.86903e-207	-9.49263	0.114	0.621	1.12685e-203	PGC	HOXC13.MA0907.1
1.16212e-206	-3.07241	0.164	0.717	2.23127e-203	PGC	MEF2A.MA0052.3
3.06569e-205	3.20625	0.848	0.27	5.88613e-202	PGC	ZN740-HUMAN.H10MO.D
9.96471e-205	-4.21726	0.151	0.707	1.91323e-201	PGC	HIC2-HUMAN.H10MO.D
6.71154e-204	-7.14047	0.115	0.643	1.28862e-200	PGC	KAISO-HUMAN.H10MO.A
7.15442e-204	3.10113	0.81	0.267	1.37365e-200	PGC	INSM1.MA0155.1
7.2711e-204	-20.1279	0.094	0.609	1.39605e-200	PGC	HME1-HUMAN.H10MO.D
9.9285e-204	-3.70354	0.158	0.695	1.90627e-200	PGC	ZBTB7B.SwissRegulon
1.53585e-203	-5.387	0.18	0.72	2.94882e-200	PGC	ETV4.MA0764.1
6.38706e-203	-5.29504	0.16	0.718	1.22632e-199	PGC	ELF4.MA0641.1
8.49091e-203	-5.91865	0.148	0.687	1.63025e-199	PGC	HINFP.MA0131.2
1.89081e-202	-3.52452	0.159	0.686	3.63035e-199	PGC	MAZ.MAZ-HUMAN.H10MO.A
2.95395e-201	-4.04018	0.148	0.704	5.67159e-198	PGC	E2F3-HUMAN.H10MO.B
5.2924e-201	-7.45195	0.109	0.657	1.01614e-197	PGC	PBX1.HOMER
5.37295e-201	-2.71037	0.163	0.702	1.03161e-197	PGC	HOXA6.SwissRegulon
5.37295e-201	-2.71037	0.163	0.702	1.03161e-197	PGC	HOXB6.SwissRegulon
6.22707e-201	-4.11248	0.167	0.709	1.1956e-197	PGC	CEBP:CEBP.HOMER
1.18349e-200	-4.58847	0.145	0.677	2.2723e-197	PGC	CHD2.SwissRegulon
1.91347e-200	-3.03607	0.172	0.709	3.67387e-197	PGC	MEF2D.MA0773.1
2.7594e-200	-11.0901	0.101	0.63	5.29805e-197	PGC	HXA7-HUMAN.H10MO.D
2.83494e-200	-17.6188	0.095	0.613	5.44308e-197	PGC	ESX1-HUMAN.H10MO.D
7.29201e-200	-6.05827	0.165	0.69	1.40007e-196	PGC	ELF2.SwissRegulon
3.10508e-198	-3.24585	0.174	0.721	5.96175e-195	PGC	IRF2-HUMAN.H10MO.C
1.50018e-196	-5.82465	0.166	0.713	2.88034e-193	PGC	ELK4.MA0076.2
1.51562e-196	-9.40207	0.109	0.609	2.90999e-193	PGC	PGR.HOMER
2.59243e-196	-5.60852	0.156	0.674	4.97747e-193	PGC	EGR4.MA0733.1
3.36157e-195	1.98918	0.794	0.248	6.45422e-192	PGC	SRBP2-HUMAN.H10MO.B
7.18159e-195	-10.8547	0.111	0.63	1.37886e-191	PGC	EPAS1.SwissRegulon
1.92852e-194	-5.17948	0.187	0.703	3.70277e-191	PGC	FEV.MA0156.2
3.44723e-194	-7.85431	0.107	0.632	6.61869e-191	PGC	REST-NRSF.HOMER
1.91965e-193	-2.77955	0.178	0.718	3.68572e-190	PGC	HES5.SwissRegulon
1.29746e-192	-3.86655	0.173	0.695	2.49111e-189	PGC	MGAP-HUMAN.H10MO.D
1.64374e-192	5.50315	0.749	0.208	3.15599e-189	PGC	POU3F3.MA0788.1
1.27568e-191	-4.24896	0.161	0.686	2.4493e-188	PGC	ELF2-HUMAN.H10MO.C
3.62445e-191	-4.80472	0.161	0.669	6.95895e-188	PGC	PBX3.MA1114.1
8.49759e-191	-8.21375	0.122	0.641	1.63154e-187	PGC	FOXO3-HUMAN.H10MO.B
1.44735e-190	-16.8082	0.07	0.574	2.77891e-187	PGC	SMAD3-HUMAN.H10MO.C
2.04142e-190	-3.83382	0.177	0.717	3.91953e-187	PGC	ELK4-HUMAN.H10MO.A
3.52726e-190	-2.67477	0.198	0.712	6.77234e-187	PGC	IRX3-HUMAN.H10MO.D
1.09453e-189	-5.56041	0.189	0.711	2.10151e-186	PGC	ETV3.MA0763.1
4.46555e-189	-3.87687	0.161	0.703	8.57386e-186	PGC	NKX25-HUMAN.H10MO.C
1.12699e-188	-6.27204	0.148	0.657	2.16382e-185	PGC	GFI1B.SwissRegulon
1.5367e-188	-4.1338	0.175	0.707	2.95047e-185	PGC	STAT2-HUMAN.H10MO.B
1.91719e-188	-6.24266	0.161	0.654	3.681e-185	PGC	E2F4.SwissRegulon
8.16215e-188	-3.52644	0.169	0.699	1.56713e-184	PGC	CHD1.SwissRegulon
1.90977e-187	-5.38862	0.15	0.641	3.66676e-184	PGC	HINFP1.SwissRegulon
4.79726e-187	-2.62656	0.194	0.727	9.21074e-184	PGC	HXA11-HUMAN.H10MO.D
6.80829e-187	-3.767	0.146	0.699	1.30719e-183	PGC	RUNX2.HOMER
4.20728e-186	-3.46269	0.188	0.693	8.07797e-183	PGC	FOXC1-HUMAN.H10MO.C
1.35863e-185	-9.60571	0.166	0.672	2.60856e-182	PGC	YY2.MA0748.1
6.37453e-184	-3.93555	0.175	0.706	1.22391e-180	PGC	EHF.MA0598.2
2.16042e-183	-5.30627	0.149	0.689	4.148e-180	PGC	LEF1.MA0768.1
5.72468e-183	-6.04357	0.138	0.642	1.09914e-179	PGC	TAL1-HUMAN.H10MO.A
8.37331e-183	-3.2541	0.179	0.696	1.60768e-179	PGC	ARE.HOMER
1.22199e-182	-2.79206	0.181	0.708	2.34623e-179	PGC	LMX1A-HUMAN.H10MO.D
1.43092e-182	-4.13265	0.186	0.702	2.74736e-179	PGC	ETV6.MA0645.1
1.53691e-182	-3.31646	0.176	0.689	2.95088e-179	PGC	MSX1-HUMAN.H10MO.D
2.39646e-181	-4.81644	0.178	0.696	4.60121e-178	PGC	ELF1.MA0473.2
5.11284e-181	-18.8103	0.08	0.585	9.81666e-178	PGC	SMAD4.SwissRegulon
1.45124e-180	-4.70985	0.185	0.69	2.78638e-177	PGC	ETV5.MA0765.1
2.36691e-179	4.129	0.749	0.222	4.54447e-176	PGC	POU5F1.SwissRegulon
4.57151e-179	-3.47125	0.173	0.68	8.7773e-176	PGC	RCOR1.SwissRegulon
5.42989e-179	-4.53059	0.2	0.703	1.04254e-175	PGC	FLI1.MA0475.2
1.16972e-178	-2.84761	0.175	0.686	2.24587e-175	PGC	BHLHE40.SwissRegulon
2.76318e-178	-4.97583	0.194	0.696	5.30531e-175	PGC	ZBTB7A.MA0750.2
5.91517e-178	-3.07479	0.154	0.684	1.13571e-174	PGC	HXC10-HUMAN.H10MO.D
3.39532e-177	-4.95888	0.176	0.675	6.51902e-174	PGC	EGR3.MA0732.1
3.53512e-177	-2.79104	0.184	0.676	6.78744e-174	PGC	ZNF35.SwissRegulon
3.7482e-177	-5.50742	0.161	0.667	7.19654e-174	PGC	NKX2-3.MA0672.1
7.74499e-177	-2.8118	0.199	0.729	1.48704e-173	PGC	IRF2.MA0051.1
8.52628e-177	-2.8231	0.188	0.711	1.63704e-173	PGC	HES7.SwissRegulon
3.94476e-176	2.19317	0.783	0.26	7.57394e-173	PGC	CUX1.SwissRegulon
1.40595e-175	-3.83988	0.213	0.713	2.69941e-172	PGC	IRF7-HUMAN.H10MO.C
2.04015e-175	-5.91457	0.147	0.636	3.91709e-172	PGC	REST.SwissRegulon
3.84587e-175	-3.38217	0.207	0.719	7.38408e-172	PGC	IRF7.SwissRegulon
5.57612e-175	-3.93962	0.18	0.671	1.07062e-171	PGC	STAT2.SwissRegulon
9.42608e-175	-9.10699	0.154	0.663	1.80981e-171	PGC	LHX4-HUMAN.H10MO.D
1.21779e-174	-4.66401	0.16	0.648	2.33817e-171	PGC	ETV1-HUMAN.H10MO.B
1.96034e-174	-2.32258	0.196	0.707	3.76386e-171	PGC	IRF9.SwissRegulon
4.10016e-174	-7.42143	0.137	0.638	7.87231e-171	PGC	CDX1.MA0878.1
1.5465e-173	-7.00244	0.136	0.65	2.96928e-170	PGC	ZNF143.MA0088.2
1.03548e-172	-5.51682	0.167	0.657	1.98813e-169	PGC	RFX2-HUMAN.H10MO.C
2.54216e-172	-6.75273	0.158	0.656	4.88095e-169	PGC	GLI3-HUMAN.H10MO.B
8.03e-172	-2.69392	0.206	0.714	1.54176e-168	PGC	HEY1.MA0823.1
2.28276e-171	-4.35205	0.154	0.674	4.3829e-168	PGC	NKX2-8.MA0673.1
3.04561e-171	-9.00235	0.134	0.625	5.84756e-168	PGC	EPAS1-HUMAN.H10MO.D
1.6239e-170	-4.16391	0.195	0.708	3.11789e-167	PGC	NFE2.SwissRegulon
1.7282e-170	2.3227	0.794	0.282	3.31814e-167	PGC	RAR:RXR.HOMER
2.34016e-170	-4.55842	0.171	0.662	4.4931e-167	PGC	NFYC-HUMAN.H10MO.B
4.52201e-170	-3.48616	0.194	0.672	8.68225e-167	PGC	PML.SwissRegulon
2.47696e-169	-2.80885	0.195	0.718	4.75577e-166	PGC	IRF7.MA0772.1
4.54642e-169	-3.88358	0.203	0.695	8.72912e-166	PGC	ETS1.MA0098.3
1.31091e-168	2.93162	0.8	0.273	2.51695e-165	PGC	ZNF281.SwissRegulon
2.52464e-168	-6.41059	0.138	0.631	4.84732e-165	PGC	NHLH1.MA0048.2
3.77295e-168	-14.2062	0.087	0.57	7.24407e-165	PGC	ETS:RUNX.HOMER
4.92857e-168	-2.78288	0.205	0.702	9.46286e-165	PGC	ETV2.SwissRegulon
5.48375e-168	-4.40101	0.181	0.655	1.05288e-164	PGC	FUBP1-HUMAN.H10MO.D
1.1152e-167	-2.91259	0.198	0.702	2.14118e-164	PGC	HEY1.SwissRegulon
1.72728e-167	2.96635	0.746	0.225	3.31638e-164	PGC	SOX2-HUMAN.H10MO.B
2.01008e-167	-3.61953	0.199	0.692	3.85936e-164	PGC	TFDP1-HUMAN.H10MO.S
3.82757e-167	-2.33152	0.211	0.705	7.34893e-164	PGC	HES7.MA0822.1
4.97743e-167	-3.86797	0.192	0.699	9.55667e-164	PGC	ELF1.HOMER
4.97743e-167	-3.86797	0.192	0.699	9.55667e-164	PGC	ETS.HOMER
4.97743e-167	-3.86797	0.192	0.699	9.55667e-164	PGC	ETV1.HOMER
4.97743e-167	-3.86797	0.192	0.699	9.55667e-164	PGC	GABPA.HOMER
5.71999e-167	-3.51769	0.193	0.674	1.09824e-163	PGC	HOXC11.MA0651.1
1.1241e-166	-2.40251	0.211	0.708	2.15827e-163	PGC	HNF6-HUMAN.H10MO.C
6.40873e-166	2.44418	0.757	0.251	1.23048e-162	PGC	NFKB1-HUMAN.H10MO.B
8.43014e-166	-3.10511	0.204	0.692	1.61859e-162	PGC	MEF2B.MA0660.1
3.71503e-165	-2.94374	0.206	0.695	7.13285e-162	PGC	AHR-HUMAN.H10MO.B
3.33274e-164	-7.22537	0.145	0.638	6.39886e-161	PGC	GLI3.HOMER
5.56702e-163	-5.10709	0.173	0.66	1.06887e-159	PGC	HMX3-HUMAN.H10MO.D
8.07974e-163	-3.47578	0.202	0.687	1.55131e-159	PGC	IRF1.MA0050.2
8.18419e-163	-5.70283	0.175	0.667	1.57136e-159	PGC	HOXB13.MA0901.1
1.2168e-162	-3.91928	0.196	0.666	2.33625e-159	PGC	E2F3.SwissRegulon
1.08115e-161	-2.67046	0.2	0.702	2.07581e-158	PGC	CEBPE.SwissRegulon
1.93899e-161	-4.11119	0.213	0.684	3.72286e-158	PGC	ERG.MA0474.2
2.57978e-161	-3.77509	0.196	0.663	4.95317e-158	PGC	FOXB1-HUMAN.H10MO.D
3.41616e-161	-2.61744	0.238	0.703	6.55903e-158	PGC	CEBPD.SwissRegulon
3.63924e-161	2.42061	0.761	0.255	6.98735e-158	PGC	GATA6.SwissRegulon
6.51105e-161	2.37807	0.769	0.271	1.25012e-157	PGC	COT2-HUMAN.H10MO.A
8.4866e-161	-4.54069	0.178	0.672	1.62943e-157	PGC	E2F2-HUMAN.H10MO.B
1.35204e-160	2.34416	0.769	0.283	2.59592e-157	PGC	SNAI1-HUMAN.H10MO.C
1.439e-160	-3.42051	0.185	0.692	2.76289e-157	PGC	STAT5B.SwissRegulon
2.57266e-160	-3.19647	0.174	0.643	4.93951e-157	PGC	TFDP1-HUMAN.H10MO.D
3.45201e-160	-3.51327	0.216	0.684	6.62786e-157	PGC	ERF.MA0760.1
3.96661e-160	-3.14292	0.22	0.692	7.6159e-157	PGC	ETV2.MA0762.1
4.45981e-160	-3.55279	0.183	0.678	8.56284e-157	PGC	ZNF711.HOMER
5.73798e-160	-6.84997	0.167	0.622	1.10169e-156	PGC	HOXB4.SwissRegulon
6.5067e-160	-2.79084	0.201	0.708	1.24929e-156	PGC	HEY2.MA0649.1
7.1497e-160	-3.26813	0.179	0.665	1.37274e-156	PGC	ZBTB16.SwissRegulon
8.10188e-160	-7.9636	0.124	0.603	1.55556e-156	PGC	ATOH1.SwissRegulon
8.82475e-160	-2.72629	0.203	0.682	1.69435e-156	PGC	MAFG.MAFG.SwissRegulon
9.50067e-160	-2.53276	0.205	0.691	1.82413e-156	PGC	IRX3.SwissRegulon
1.09636e-159	-3.04063	0.212	0.706	2.10502e-156	PGC	ARID5A.SwissRegulon
1.41667e-159	-9.27103	0.14	0.619	2.72001e-156	PGC	ZBTB12.HOMER
2.0048e-159	-4.80805	0.174	0.631	3.84921e-156	PGC	HINFP.SwissRegulon
1.04162e-156	-4.67296	0.2	0.706	1.99991e-153	PGC	PITX1.SwissRegulon
1.15616e-156	-4.47742	0.185	0.649	2.21983e-153	PGC	FUBP1.SwissRegulon
4.28528e-156	-2.72003	0.193	0.691	8.22775e-153	PGC	PAX5.HOMER
1.43759e-155	-6.60639	0.153	0.633	2.76016e-152	PGC	SMAD4-HUMAN.H10MO.C
4.36156e-155	-2.91464	0.198	0.692	8.3742e-152	PGC	ZN410-HUMAN.H10MO.D
5.65646e-154	-3.99751	0.173	0.659	1.08604e-150	PGC	GZF1.SwissRegulon
7.46093e-154	2.24972	0.744	0.264	1.4325e-150	PGC	NFKB1.SwissRegulon
1.35625e-153	-2.53526	0.217	0.687	2.60401e-150	PGC	PAX8-HUMAN.H10MO.D
2.27456e-153	-9.69011	0.161	0.597	4.36715e-150	PGC	FOXG1.MA0613.1
2.96184e-153	-3.92808	0.187	0.665	5.68674e-150	PGC	ZBTB33.HOMER
6.96682e-153	-2.75506	0.196	0.672	1.33763e-149	PGC	HIF1A.MA1106.1
1.12204e-152	-6.92428	0.145	0.61	2.15432e-149	PGC	MYOG.SwissRegulon
2.09392e-152	-2.60749	0.223	0.695	4.02033e-149	PGC	HIC2.MA0738.1
5.39677e-152	-2.29686	0.206	0.695	1.03618e-148	PGC	HES5.MA0821.1
6.73118e-152	-4.25596	0.183	0.637	1.29239e-148	PGC	E2F1.MA0024.3
7.52484e-152	-4.53142	0.178	0.645	1.44477e-148	PGC	USF2-HUMAN.H10MO.A
8.61444e-152	-3.03544	0.205	0.67	1.65397e-148	PGC	PAX1.SwissRegulon
8.64987e-152	-5.07407	0.179	0.643	1.66078e-148	PGC	MNX1-HUMAN.H10MO.D
1.9313e-151	-2.48135	0.219	0.7	3.70809e-148	PGC	FOXP1.HOMER
7.28923e-151	-3.30425	0.183	0.66	1.39953e-147	PGC	IRF2.HOMER
1.31371e-150	-2.43722	0.218	0.704	2.52232e-147	PGC	MNT.MA0825.1
1.83822e-150	2.30724	0.793	0.299	3.52938e-147	PGC	RREB1.MA0073.1
3.29285e-150	-2.39732	0.206	0.677	6.32228e-147	PGC	HOXC13.SwissRegulon
5.64034e-150	-2.45239	0.229	0.7	1.08295e-146	PGC	BHLHE41.SwissRegulon
1.0932e-149	-2.93512	0.207	0.677	2.09895e-146	PGC	NR1I2-HUMAN.H10MO.S
1.0932e-149	-2.93512	0.207	0.677	2.09895e-146	PGC	NR1I2.SwissRegulon
2.12248e-149	-2.56284	0.212	0.687	4.07515e-146	PGC	HEY2.SwissRegulon
5.50331e-149	-3.05601	0.207	0.654	1.05664e-145	PGC	IRF1.HOMER
1.99127e-148	-2.53104	0.207	0.682	3.82325e-145	PGC	NFIL3.MA0025.1
2.90711e-148	3.34072	0.739	0.258	5.58165e-145	PGC	SOX9.MA0077.1
4.3575e-148	-2.66826	0.226	0.69	8.3664e-145	PGC	MXI1.SwissRegulon
5.80756e-148	-3.08887	0.217	0.66	1.11505e-144	PGC	ETV6.SwissRegulon
7.36379e-148	-2.58161	0.199	0.648	1.41385e-144	PGC	ZNF384.MA1125.1
2.22888e-147	-4.31724	0.199	0.64	4.27945e-144	PGC	TAF1.SwissRegulon
5.46754e-147	-3.12562	0.204	0.653	1.04977e-143	PGC	HOXC10.MA0905.1
3.87491e-146	-2.52546	0.227	0.688	7.43983e-143	PGC	MLX-HUMAN.H10MO.D
4.05312e-146	-5.67365	0.183	0.641	7.78199e-143	PGC	RHOXF2.SwissRegulon
5.27001e-146	2.26028	0.744	0.314	1.01184e-142	PGC	PLAG1-HUMAN.H10MO.S
5.27001e-146	2.26028	0.744	0.314	1.01184e-142	PGC	PLAG1.SwissRegulon
7.16805e-146	-2.55116	0.231	0.696	1.37627e-142	PGC	SPDEF.MA0686.1
1.06746e-145	-2.54116	0.246	0.691	2.04953e-142	PGC	BHLHE41.MA0636.1
1.84431e-145	-2.62708	0.199	0.671	3.54108e-142	PGC	MEF2C.MA0497.1
2.58833e-145	-9.12328	0.149	0.599	4.9696e-142	PGC	SOX18-HUMAN.H10MO.D
3.29723e-145	-9.06113	0.125	0.553	6.33067e-142	PGC	MYOG-HUMAN.H10MO.D
3.59722e-145	-2.62026	0.208	0.672	6.90666e-142	PGC	AIRE-HUMAN.H10MO.C
4.8666e-145	-9.53866	0.178	0.602	9.34388e-142	PGC	FOXO4.MA0848.1
4.8666e-145	-9.53866	0.178	0.602	9.34388e-142	PGC	FOXO6.MA0849.1
1.00934e-144	-4.52787	0.196	0.656	1.93794e-141	PGC	HOXA2.HOMER
2.03102e-144	-2.68999	0.216	0.693	3.89955e-141	PGC	PKNOX2.SwissRegulon
3.07549e-144	2.18416	0.738	0.255	5.90494e-141	PGC	ZNF711.SwissRegulon
7.69213e-144	-5.37452	0.2	0.686	1.47689e-140	PGC	NKX6-1.SwissRegulon
1.01491e-143	-3.85194	0.181	0.641	1.94862e-140	PGC	HES5-HUMAN.H10MO.D
1.42293e-143	-2.63657	0.208	0.668	2.73203e-140	PGC	AIRE.SwissRegulon
1.55609e-143	-2.55831	0.224	0.719	2.9877e-140	PGC	PRRX2.SwissRegulon
1.55627e-143	-3.17385	0.206	0.641	2.98804e-140	PGC	FOXA1:AR.HOMER
1.92393e-143	-10.3817	0.13	0.583	3.69395e-140	PGC	GSC-HUMAN.H10MO.D
2.58602e-143	-6.81549	0.189	0.614	4.96515e-140	PGC	BATF-HUMAN.H10MO.A
6.82036e-143	-2.04687	0.233	0.697	1.30951e-139	PGC	GSX2-HUMAN.H10MO.D
5.46563e-142	-4.17185	0.199	0.654	1.0494e-138	PGC	SP8.SwissRegulon
5.74634e-142	2.74337	0.738	0.263	1.1033e-138	PGC	OCT4-SOX2-TCF-NANOG.HOMER
1.04008e-141	-3.05177	0.212	0.664	1.99696e-138	PGC	PAX2-HUMAN.H10MO.D
3.26262e-141	-2.76192	0.22	0.651	6.26423e-138	PGC	EGR2.MA0472.2
7.7217e-141	-2.70558	0.218	0.664	1.48257e-137	PGC	RBPJ.SwissRegulon
9.81357e-141	-2.53321	0.217	0.677	1.88421e-137	PGC	MAFB.MAFB.SwissRegulon
1.02459e-140	-3.06074	0.205	0.659	1.96721e-137	PGC	SRY-HUMAN.H10MO.B
1.47939e-140	-5.87497	0.205	0.637	2.84043e-137	PGC	MEOX1-HUMAN.H10MO.D
2.02403e-140	-2.21699	0.229	0.7	3.88614e-137	PGC	PAX2-HUMAN.H10MO.S
2.66201e-140	-3.07336	0.206	0.666	5.11106e-137	PGC	NR3C1.SwissRegulon
3.66569e-140	-3.20207	0.219	0.656	7.03813e-137	PGC	EGR3.SwissRegulon
1.09573e-139	-2.35252	0.241	0.711	2.1038e-136	PGC	NFATC3.MA0625.1
1.1022e-139	-2.63044	0.227	0.658	2.11622e-136	PGC	MEF2B.SwissRegulon
1.16807e-139	-2.73805	0.208	0.68	2.2427e-136	PGC	MEF2A.SwissRegulon
1.71716e-139	-2.46907	0.207	0.68	3.29694e-136	PGC	HEY1-HUMAN.H10MO.D
2.46263e-139	-13.3598	0.161	0.565	4.72826e-136	PGC	FOXD1.MA0031.1
2.46263e-139	-13.3598	0.161	0.565	4.72826e-136	PGC	FOXO3.MA0157.2
2.47938e-139	2.78347	0.751	0.263	4.76041e-136	PGC	GTF2I.SwissRegulon
3.88744e-139	-13.1917	0.163	0.569	7.46388e-136	PGC	FOXI1.MA0042.2
3.88744e-139	-13.1917	0.163	0.569	7.46388e-136	PGC	FOXL1.MA0033.2
3.88744e-139	-13.1917	0.163	0.569	7.46388e-136	PGC	FOXD2.MA0847.1
3.88744e-139	-13.1917	0.163	0.569	7.46388e-136	PGC	FOXP3.MA0850.1
3.88744e-139	-13.1917	0.163	0.569	7.46388e-136	PGC	FOXG1.SwissRegulon
3.88744e-139	-13.1917	0.163	0.569	7.46388e-136	PGC	FOXK1.SwissRegulon
3.88744e-139	-13.1917	0.163	0.569	7.46388e-136	PGC	FOXP3.SwissRegulon
5.29531e-139	-2.29261	0.231	0.675	1.0167e-135	PGC	E2F4.HOMER
6.17096e-139	-3.09846	0.217	0.659	1.18482e-135	PGC	E2F7.HOMER
1.89024e-138	-3.89775	0.217	0.657	3.62926e-135	PGC	LHX8-HUMAN.H10MO.D
1.98196e-138	-3.19072	0.212	0.687	3.80536e-135	PGC	ETV5.SwissRegulon
7.43417e-138	-2.51719	0.243	0.69	1.42736e-134	PGC	MLX.SwissRegulon
9.44712e-138	-2.35469	0.222	0.674	1.81385e-134	PGC	ELF5.SwissRegulon
1.69437e-137	-2.59012	0.207	0.676	3.25319e-134	PGC	ATF6A-HUMAN.H10MO.B
3.9083e-137	-5.60447	0.202	0.616	7.50394e-134	PGC	GFI1-HUMAN.H10MO.C
4.21047e-137	-2.18799	0.236	0.696	8.0841e-134	PGC	SPDEF.SwissRegulon
4.29885e-137	-3.1341	0.229	0.669	8.25379e-134	PGC	ELK1-HUMAN.H10MO.A
1.82417e-136	2.03245	0.768	0.278	3.50241e-133	PGC	PROX1-HUMAN.H10MO.D
2.47844e-136	2.68122	0.774	0.316	4.75861e-133	PGC	ZNF740.SwissRegulon
3.76859e-136	-4.44105	0.188	0.643	7.23569e-133	PGC	HOXA2.SwissRegulon
8.22902e-136	-4.39851	0.186	0.639	1.57997e-132	PGC	RUNX1.HOMER
1.0645e-135	2.08203	0.738	0.293	2.04384e-132	PGC	ZNF423.SwissRegulon
1.28591e-135	-2.34996	0.225	0.673	2.46895e-132	PGC	HOXD8.SwissRegulon
1.75861e-135	-2.07514	0.249	0.692	3.37653e-132	PGC	OVOL1-HUMAN.H10MO.C
1.75861e-135	-2.07514	0.249	0.692	3.37653e-132	PGC	OVOL1.SwissRegulon
2.0295e-135	-2.68299	0.234	0.688	3.89664e-132	PGC	STAT1::STAT2.MA0517.1
2.33898e-135	1.97738	0.743	0.285	4.49084e-132	PGC	PLAG1.MA0163.1
3.58581e-135	-2.499	0.218	0.668	6.88475e-132	PGC	NFAT.HOMER
4.81293e-135	-2.13319	0.233	0.695	9.24082e-132	PGC	DBX2.SwissRegulon
7.76317e-135	-2.9623	0.203	0.662	1.49053e-131	PGC	ELK4.SwissRegulon
1.39115e-134	-2.10733	0.252	0.691	2.671e-131	PGC	TBX19-HUMAN.H10MO.D
2.2824e-134	-2.45618	0.235	0.672	4.38221e-131	PGC	TBX2-HUMAN.H10MO.D
2.07012e-133	-2.90242	0.224	0.68	3.97463e-130	PGC	E2F7.SwissRegulon
6.60063e-133	-2.11698	0.23	0.67	1.26732e-129	PGC	PROP1-HUMAN.H10MO.D
8.39812e-133	-2.41425	0.236	0.675	1.61244e-129	PGC	ERF.SwissRegulon
1.34083e-132	-3.65909	0.204	0.633	2.57438e-129	PGC	ZBT7B-HUMAN.H10MO.D
1.05991e-131	-2.64543	0.232	0.665	2.03503e-128	PGC	MAX::MYC.MA0059.1
2.3891e-131	-2.29512	0.262	0.687	4.58707e-128	PGC	TFEB-HUMAN.H10MO.C
4.05594e-131	2.66596	0.748	0.312	7.78741e-128	PGC	EKLF.HOMER
4.20035e-131	1.88156	0.754	0.3	8.06468e-128	PGC	INSM1-HUMAN.H10MO.C
1.03712e-130	-2.88887	0.223	0.66	1.99127e-127	PGC	HOXD13.HOMER
1.59558e-130	-4.11369	0.211	0.653	3.06351e-127	PGC	ZNF382.HOMER
3.25075e-130	2.21585	0.715	0.284	6.24144e-127	PGC	GATA1-HUMAN.H10MO.S
7.32388e-130	-8.19314	0.189	0.592	1.40619e-126	PGC	FOXP2.MA0593.1
8.31995e-130	-2.56158	0.237	0.674	1.59743e-126	PGC	PRDM1.MA0508.2
8.48734e-130	-2.86015	0.23	0.665	1.62957e-126	PGC	HMX1.SwissRegulon
1.15977e-129	-2.49279	0.248	0.676	2.22675e-126	PGC	CRE.HOMER
1.37216e-129	-2.1432	0.263	0.69	2.63455e-126	PGC	BHLHE40.MA0464.2
1.74457e-129	-2.64421	0.229	0.663	3.34958e-126	PGC	IRF1-HUMAN.H10MO.A
1.91113e-129	2.30569	0.763	0.297	3.66936e-126	PGC	TBX15-HUMAN.H10MO.D
1.99372e-129	-3.59738	0.227	0.669	3.82794e-126	PGC	EVX1.SwissRegulon
2.57283e-129	-2.71718	0.205	0.628	4.93983e-126	PGC	HMGA1-HUMAN.H10MO.D
2.57283e-129	-2.71718	0.205	0.628	4.93983e-126	PGC	HMGA1.SwissRegulon
3.15009e-129	-2.47965	0.223	0.661	6.04817e-126	PGC	ZSCAN4.SwissRegulon
3.35376e-129	-2.99553	0.234	0.671	6.43923e-126	PGC	ELF3.MA0640.1
5.00564e-129	-3.67521	0.199	0.629	9.61083e-126	PGC	TFAP2D.SwissRegulon
5.79539e-129	-6.2989	0.187	0.599	1.11271e-125	PGC	NDF1-HUMAN.H10MO.C
2.98876e-128	-2.37358	0.258	0.694	5.73842e-125	PGC	HOXD13.MA0909.1
5.51194e-128	2.03841	0.719	0.283	1.05829e-124	PGC	NR2F6-HUMAN.H10MO.D
1.03e-127	-2.14881	0.239	0.677	1.97759e-124	PGC	GATA2.SwissRegulon
1.03326e-127	2.72707	0.707	0.279	1.98387e-124	PGC	SOX9.SwissRegulon
2.55465e-127	-5.73846	0.2	0.632	4.90493e-124	PGC	ZNF652.SwissRegulon
3.64072e-127	-2.76663	0.223	0.653	6.99018e-124	PGC	E2F5-HUMAN.H10MO.B
3.64072e-127	-2.76663	0.223	0.653	6.99018e-124	PGC	E2F5.SwissRegulon
5.78695e-127	-2.5277	0.249	0.686	1.11109e-123	PGC	TFEB.SwissRegulon
2.57935e-126	-2.24139	0.234	0.674	4.95235e-123	PGC	IRF9-HUMAN.H10MO.C
2.58036e-126	-1.95106	0.247	0.688	4.9543e-123	PGC	HXD12-HUMAN.H10MO.D
2.97436e-126	1.74071	0.742	0.298	5.71077e-123	PGC	PLAG1-HUMAN.H10MO.D
4.37579e-126	-11.0375	0.192	0.559	8.40151e-123	PGC	FOXP1.MA0481.2
5.99436e-126	-2.37272	0.235	0.675	1.15092e-122	PGC	VDR.MA0693.2
1.22702e-125	1.98063	0.74	0.28	2.35588e-122	PGC	RELA.SwissRegulon
1.37189e-125	-2.24662	0.233	0.65	2.63402e-122	PGC	HES7-HUMAN.H10MO.D
1.38877e-125	-2.28738	0.242	0.666	2.66644e-122	PGC	SIX1.SwissRegulon
1.79402e-125	1.93698	0.736	0.31	3.44451e-122	PGC	INSM1.SwissRegulon
2.11344e-125	-4.90085	0.205	0.613	4.05781e-122	PGC	PBX3-HUMAN.H10MO.B
6.73182e-125	-2.27176	0.247	0.661	1.29251e-121	PGC	FEV.SwissRegulon
8.50669e-125	-3.73549	0.24	0.641	1.63328e-121	PGC	EN2.SwissRegulon
9.41484e-125	3.54186	0.703	0.243	1.80765e-121	PGC	POU2F2.MA0507.1
1.1903e-124	-2.9368	0.212	0.644	2.28538e-121	PGC	PAX1.MA0779.1
2.36277e-124	-2.38964	0.229	0.667	4.53651e-121	PGC	ATF6.SwissRegulon
3.43516e-124	-2.2871	0.219	0.665	6.59552e-121	PGC	GATA:SCL.HOMER
3.4386e-124	-2.48096	0.217	0.64	6.60211e-121	PGC	PAX9.MA0781.1
3.66133e-124	-6.21348	0.183	0.604	7.02975e-121	PGC	TEAD1.SwissRegulon
4.20101e-124	-4.56021	0.196	0.601	8.06594e-121	PGC	BACH1-HUMAN.H10MO.A
5.25751e-124	-2.7328	0.237	0.642	1.00944e-120	PGC	ISX.SwissRegulon
1.76788e-123	-2.34134	0.245	0.651	3.39434e-120	PGC	ARNT.SwissRegulon
2.01395e-123	-7.36465	0.172	0.571	3.86679e-120	PGC	TAL1.SwissRegulon
2.01395e-123	-7.36465	0.172	0.571	3.86679e-120	PGC	SCL.HOMER
2.37236e-123	-2.68535	0.227	0.643	4.55493e-120	PGC	FOXL1-HUMAN.H10MO.D
3.67079e-123	-2.2971	0.232	0.656	7.04793e-120	PGC	HOXA13.SwissRegulon
8.78241e-123	-3.44179	0.213	0.63	1.68622e-119	PGC	HINFP-HUMAN.H10MO.C
8.89037e-123	-2.73295	0.231	0.661	1.70695e-119	PGC	ELF5.MA0136.2
9.64277e-123	-3.6996	0.213	0.624	1.85141e-119	PGC	MAFB.MAFB-HUMAN.H10MO.D
1.04855e-122	-2.50707	0.261	0.673	2.01321e-119	PGC	MLXIPL.MA0664.1
1.07876e-122	-3.0646	0.218	0.648	2.07122e-119	PGC	TGIF1.MA0796.1
1.2783e-122	-10.7751	0.192	0.563	2.45434e-119	PGC	FOXK2.MA1103.1
1.30116e-122	-8.25892	0.175	0.583	2.49822e-119	PGC	TBX20.MA0689.1
2.8003e-122	-10.5067	0.212	0.628	5.37658e-119	PGC	YY1.MA0095.2
1.12989e-121	-2.13304	0.238	0.658	2.16938e-118	PGC	HXD11-HUMAN.H10MO.D
1.73855e-121	-2.56426	0.253	0.672	3.33802e-118	PGC	OTP.SwissRegulon
1.88427e-121	-2.23786	0.234	0.665	3.61779e-118	PGC	FOXG1-HUMAN.H10MO.D
1.91731e-121	-1.81214	0.254	0.67	3.68123e-118	PGC	NKX31-HUMAN.H10MO.C
2.86522e-121	-2.95724	0.234	0.634	5.50123e-118	PGC	ANDR-HUMAN.H10MO.A
3.57309e-121	-2.59625	0.251	0.677	6.86033e-118	PGC	DUXA.MA0884.1
4.21911e-121	-5.30542	0.2	0.628	8.10069e-118	PGC	PBX1.MA0070.1
5.88609e-121	2.00535	0.716	0.296	1.13013e-117	PGC	TF65-HUMAN.H10MO.A
8.57485e-121	-2.03663	0.229	0.647	1.64637e-117	PGC	IRX4.SwissRegulon
2.95318e-120	-2.06329	0.249	0.676	5.6701e-117	PGC	MSX1.SwissRegulon
4.8491e-120	-2.32208	0.235	0.65	9.31028e-117	PGC	BACH2.SwissRegulon
6.18804e-120	-2.87034	0.228	0.65	1.1881e-116	PGC	TGIF2.MA0797.1
9.60698e-120	1.75381	0.742	0.292	1.84454e-116	PGC	WRNIP1.SwissRegulon
1.56102e-119	-2.10398	0.235	0.639	2.99716e-116	PGC	FOXJ3-HUMAN.H10MO.A
1.6204e-119	-4.85794	0.21	0.632	3.11118e-116	PGC	SOX10.SwissRegulon
2.69412e-119	-3.27983	0.255	0.662	5.17271e-116	PGC	RARB.SwissRegulon
3.15563e-119	-2.31563	0.224	0.66	6.05882e-116	PGC	ONECUT3.SwissRegulon
3.28394e-119	-6.99755	0.177	0.582	6.30517e-116	PGC	ZIC3-HUMAN.H10MO.C
8.48182e-119	-2.36554	0.23	0.656	1.62851e-115	PGC	HES1-HUMAN.H10MO.D
1.91433e-118	-2.21625	0.274	0.667	3.67551e-115	PGC	MXI1.MA1108.1
2.50623e-118	-5.97891	0.217	0.597	4.81195e-115	PGC	FOXC2.MA0846.1
2.54173e-118	-1.79425	0.23	0.677	4.88013e-115	PGC	NKX6-2.SwissRegulon
5.1114e-118	-5.75694	0.196	0.595	9.81389e-115	PGC	CUX1-HUMAN.H10MO.C
6.11198e-118	-10.681	0.17	0.576	1.1735e-114	PGC	TBX21.SwissRegulon
7.85987e-118	-2.19387	0.249	0.65	1.5091e-114	PGC	MYC.MA0147.3
8.27974e-118	-4.50336	0.216	0.606	1.58971e-114	PGC	AP2D-HUMAN.H10MO.D
1.25288e-117	-2.79065	0.23	0.65	2.40553e-114	PGC	GSX2.SwissRegulon
1.28649e-117	-2.52981	0.247	0.679	2.47006e-114	PGC	NFIA.SwissRegulon
8.15144e-117	-1.74111	0.258	0.689	1.56508e-113	PGC	VENTX.MA0724.1
1.71045e-116	-2.74754	0.218	0.662	3.28407e-113	PGC	MEF2C.SwissRegulon
5.19315e-116	-5.07726	0.21	0.592	9.97085e-113	PGC	TCF21.SwissRegulon
1.52897e-115	2.01793	0.706	0.292	2.93561e-112	PGC	HNF4G.MA0484.1
1.67803e-115	-2.65894	0.244	0.648	3.22182e-112	PGC	NEUROD2.SwissRegulon
1.93729e-115	2.29987	0.762	0.334	3.7196e-112	PGC	ZNF740.MA0753.1
4.81068e-115	-1.97249	0.259	0.663	9.2365e-112	PGC	SOX8.MA0868.1
7.92891e-114	-1.80631	0.26	0.673	1.52235e-110	PGC	IRX2.SwissRegulon
1.01594e-113	-2.36484	0.225	0.618	1.9506e-110	PGC	PO3F4-HUMAN.H10MO.D
1.28202e-113	-2.3583	0.231	0.653	2.46147e-110	PGC	FOXO1-HUMAN.H10MO.C
1.29431e-113	-4.52835	0.238	0.625	2.48508e-110	PGC	HOXA10.MA0899.1
1.5033e-113	1.36357	0.743	0.313	2.88634e-110	PGC	PURA-HUMAN.H10MO.D
1.51934e-113	1.78144	0.699	0.294	2.91713e-110	PGC	PLAGL1.SwissRegulon
1.9044e-113	-2.22748	0.24	0.648	3.65644e-110	PGC	ARNT::HIF1A.MA0259.1
3.4569e-113	-8.5235	0.173	0.566	6.63724e-110	PGC	CRX-HUMAN.H10MO.C
3.4569e-113	-8.5235	0.173	0.566	6.63724e-110	PGC	CRX.SwissRegulon
3.69279e-113	-2.11785	0.245	0.659	7.09016e-110	PGC	RFX7.SwissRegulon
3.79593e-113	-3.11126	0.241	0.653	7.28818e-110	PGC	TFEC.MA0871.1
6.72989e-113	-4.76707	0.2	0.581	1.29214e-109	PGC	MLXIPL.SwissRegulon
1.35169e-112	-2.44422	0.245	0.658	2.59525e-109	PGC	E2F2.SwissRegulon
1.69407e-112	2.01759	0.701	0.285	3.25262e-109	PGC	ESRRA.SwissRegulon
1.75547e-112	-9.44239	0.199	0.552	3.37051e-109	PGC	FOXK1.MA0852.2
1.93893e-112	-2.8139	0.251	0.634	3.72275e-109	PGC	GMEB1.SwissRegulon
2.54416e-112	1.7254	0.727	0.326	4.88479e-109	PGC	RXRA-HUMAN.H10MO.C
4.35017e-112	-2.3535	0.229	0.633	8.35233e-109	PGC	PO3F3-HUMAN.H10MO.D
8.51145e-112	-5.60694	0.211	0.594	1.6342e-108	PGC	RUNX2-HUMAN.H10MO.B
8.64671e-111	-2.10728	0.224	0.622	1.66017e-107	PGC	SP3-HUMAN.H10MO.B
8.64671e-111	-2.10728	0.224	0.622	1.66017e-107	PGC	SP3.SwissRegulon
1.1667e-110	-4.07805	0.253	0.662	2.24006e-107	PGC	TFEB.MA0692.1
1.76141e-110	-1.80267	0.249	0.673	3.38191e-107	PGC	MYBL1.SwissRegulon
2.28868e-110	1.80637	0.71	0.331	4.39427e-107	PGC	HXD3-HUMAN.H10MO.D
7.01235e-110	-2.25528	0.257	0.645	1.34637e-106	PGC	GLI2.SwissRegulon
7.45709e-110	-1.75155	0.254	0.667	1.43176e-106	PGC	DLX4.SwissRegulon
1.55574e-109	-2.65512	0.256	0.666	2.98702e-106	PGC	IRF3.MA1418.1
6.07763e-109	0.825707	0.697	0.273	1.1669e-105	PGC	NFIC.SwissRegulon
1.56532e-108	-1.89692	0.244	0.657	3.00541e-105	PGC	ETV3-HUMAN.H10MO.D
1.93314e-108	-1.74696	0.27	0.674	3.71163e-105	PGC	MAX.MA0058.3
3.19779e-108	-4.65879	0.194	0.598	6.13975e-105	PGC	KLF8-HUMAN.H10MO.C
3.19779e-108	-4.65879	0.194	0.598	6.13975e-105	PGC	KLF8.SwissRegulon
1.05574e-107	-2.21074	0.267	0.632	2.02703e-104	PGC	E2F.HOMER
2.35545e-107	-2.79496	0.219	0.634	4.52247e-104	PGC	ZIC3.MA0697.1
3.24292e-107	-3.79438	0.261	0.664	6.2264e-104	PGC	USF2.SwissRegulon
3.59702e-107	-4.47632	0.212	0.578	6.90628e-104	PGC	MLXPL-HUMAN.H10MO.D
3.754e-107	1.99199	0.758	0.329	7.20767e-104	PGC	KLF5.MA0599.1
6.31318e-107	-3.36373	0.217	0.615	1.21213e-103	PGC	BHE41-HUMAN.H10MO.D
9.17476e-107	-1.98875	0.264	0.666	1.76155e-103	PGC	NFATC1.SwissRegulon
1.18074e-106	-2.4411	0.259	0.627	2.26702e-103	PGC	E2F7-HUMAN.H10MO.D
1.41371e-106	-3.0189	0.251	0.625	2.71432e-103	PGC	MTF1.MA0863.1
3.07027e-106	-1.95568	0.264	0.662	5.89492e-103	PGC	MYCN-HUMAN.H10MO.B
3.07027e-106	-1.95568	0.264	0.662	5.89492e-103	PGC	MYCN.SwissRegulon
3.23997e-106	-2.2893	0.256	0.632	6.22074e-103	PGC	RXRG.SwissRegulon
4.67216e-106	1.72528	0.754	0.334	8.97054e-103	PGC	KLF16-HUMAN.H10MO.D
1.2775e-105	-2.56505	0.249	0.63	2.4528e-102	PGC	NKX2-4.SwissRegulon
2.39061e-105	-1.90919	0.266	0.661	4.58996e-102	PGC	ZIC1.SwissRegulon
3.10777e-105	-1.96729	0.261	0.652	5.96692e-102	PGC	FOXD2-HUMAN.H10MO.D
9.41962e-105	-2.01332	0.264	0.654	1.80857e-101	PGC	MEF2D-HUMAN.H10MO.C
9.44354e-105	1.98932	0.688	0.286	1.81316e-101	PGC	AP2B-HUMAN.H10MO.B
1.09931e-104	-2.21854	0.265	0.639	2.11068e-101	PGC	CXXC1-HUMAN.H10MO.D
1.09931e-104	-2.21854	0.265	0.639	2.11068e-101	PGC	CXXC1.SwissRegulon
1.52466e-104	-2.15779	0.264	0.655	2.92735e-101	PGC	GSX1-HUMAN.H10MO.D
3.13884e-104	2.05248	0.698	0.269	6.02658e-101	PGC	EWSR1-FLI1.MA0149.1
5.3518e-104	-3.54712	0.241	0.62	1.02755e-100	PGC	ZKSCAN1.SwissRegulon
7.4386e-104	-3.78617	0.206	0.598	1.42821e-100	PGC	SCRT2-HUMAN.H10MO.D
9.44527e-104	-1.82954	0.27	0.655	1.81349e-100	PGC	IRF3.SwissRegulon
3.09526e-103	-1.88678	0.28	0.645	5.9429e-100	PGC	BHE40-HUMAN.H10MO.A
3.33269e-103	-3.03971	0.228	0.589	6.39877e-100	PGC	MTF1.SwissRegulon
4.4287e-103	-1.75822	0.287	0.667	8.5031e-100	PGC	IRF4.HOMER
5.86568e-103	-2.29698	0.254	0.628	1.12621e-99	PGC	ZBTB7C.SwissRegulon
6.78354e-103	-1.86107	0.276	0.642	1.30244e-99	PGC	PAX5.MA0014.3
1.13687e-102	-2.10628	0.274	0.651	2.18279e-99	PGC	NPAS.HOMER
2.08336e-102	-5.60207	0.218	0.565	4.00005e-99	PGC	ZNF354C.MA0130.1
2.91168e-102	-2.30029	0.27	0.663	5.59043e-99	PGC	TFE3.MA0831.2
4.43693e-102	-2.37125	0.251	0.626	8.5189e-99	PGC	RFX2.SwissRegulon
5.55541e-102	-2.09567	0.257	0.629	1.06664e-98	PGC	NR2F2.SwissRegulon
6.69046e-102	-1.67393	0.273	0.645	1.28457e-98	PGC	BBX.SwissRegulon
7.50154e-102	-1.91386	0.261	0.647	1.4403e-98	PGC	CEBPD.MA0836.1
3.59742e-101	-1.85257	0.246	0.626	6.90704e-98	PGC	ARID3A.SwissRegulon
4.481e-101	-6.6142	0.202	0.571	8.60352e-98	PGC	ZIC2.SwissRegulon
7.52651e-101	-5.60391	0.204	0.577	1.44509e-97	PGC	SCRT1-HUMAN.H10MO.D
1.61434e-100	-1.90561	0.267	0.631	3.09954e-97	PGC	BMYB.HOMER
1.80787e-100	-2.69514	0.23	0.628	3.47111e-97	PGC	ZNF519.HOMER
1.81428e-100	-2.411	0.249	0.649	3.48342e-97	PGC	MYB.SwissRegulon
1.81428e-100	-2.411	0.249	0.649	3.48342e-97	PGC	MYB.HOMER
2.35977e-100	-7.79751	0.164	0.538	4.53075e-97	PGC	TCF12.SwissRegulon
3.6968e-100	-2.25382	0.275	0.667	7.09785e-97	PGC	MLX.MA0663.1
6.93265e-100	-1.74253	0.255	0.661	1.33107e-96	PGC	STAT1.SwissRegulon
1.45389e-99	-1.79606	0.257	0.632	2.79147e-96	PGC	ARI3A-HUMAN.H10MO.D
3.33581e-99	-2.86197	0.254	0.648	6.40476e-96	PGC	TF7L1-HUMAN.H10MO.D
3.34101e-99	-1.92408	0.278	0.666	6.41474e-96	PGC	DLX4-HUMAN.H10MO.D
4.08549e-99	-1.76559	0.277	0.651	7.84413e-96	PGC	MEIS1.SwissRegulon
9.16286e-99	-1.77907	0.284	0.65	1.75927e-95	PGC	CEBPE.MA0837.1
9.96044e-99	-6.36152	0.227	0.588	1.9124e-95	PGC	SOX18.SwissRegulon
2.03459e-98	1.79308	0.706	0.317	3.90641e-95	PGC	MZF1-HUMAN.H10MO.D
2.03459e-98	1.79308	0.706	0.317	3.90641e-95	PGC	MZF1.SwissRegulon
3.1122e-98	-2.84168	0.234	0.609	5.97543e-95	PGC	ZKSC1-HUMAN.H10MO.C
3.25894e-98	-2.30119	0.277	0.647	6.25717e-95	PGC	SREBF2(var.2).MA0828.1
1.80314e-97	-1.75615	0.291	0.653	3.46202e-94	PGC	CEBPB.MA0466.2
2.54579e-97	1.75185	0.722	0.305	4.88792e-94	PGC	ZNF263.MA0528.1
2.9161e-97	1.95561	0.705	0.312	5.59892e-94	PGC	NR2F1.SwissRegulon
3.31097e-97	-2.82623	0.257	0.66	6.35707e-94	PGC	EN2.MA0642.1
5.0937e-97	-1.98026	0.264	0.626	9.7799e-94	PGC	GLIS1.SwissRegulon
5.89122e-97	-4.92765	0.227	0.596	1.13111e-93	PGC	PAX3.SwissRegulon
1.03516e-96	-6.9028	0.217	0.568	1.9875e-93	PGC	YY1.HOMER
5.13694e-96	1.73767	0.726	0.353	9.86293e-93	PGC	TBX20-HUMAN.H10MO.D
5.45112e-96	-1.9423	0.268	0.621	1.04662e-92	PGC	FOXJ3-HUMAN.H10MO.S
7.11717e-96	-1.84348	0.277	0.636	1.3665e-92	PGC	HOMEZ-HUMAN.H10MO.D
2.51768e-95	-1.84487	0.26	0.646	4.83394e-92	PGC	CREB3-HUMAN.H10MO.D
2.57021e-95	-2.55	0.248	0.621	4.9348e-92	PGC	MAX.MAX-HUMAN.H10MO.A
7.11917e-95	-2.20048	0.255	0.63	1.36688e-91	PGC	CENPB.MA0637.1
8.10133e-95	1.51538	0.699	0.328	1.55546e-91	PGC	TBX5-HUMAN.H10MO.D
1.39257e-94	-3.21368	0.27	0.659	2.67374e-91	PGC	PITX2-HUMAN.H10MO.D
1.85179e-94	-2.9268	0.264	0.621	3.55543e-91	PGC	RARA-HUMAN.H10MO.C
2.51234e-94	-1.71778	0.266	0.665	4.82369e-91	PGC	TLX2.SwissRegulon
3.58344e-94	-1.77517	0.287	0.676	6.8802e-91	PGC	HMX2-HUMAN.H10MO.D
3.98489e-94	-2.14752	0.259	0.63	7.65099e-91	PGC	PAX1-HUMAN.H10MO.D
4.23925e-94	-1.69862	0.257	0.637	8.13937e-91	PGC	RARA.SwissRegulon
4.96232e-94	-2.0582	0.253	0.594	9.52765e-91	PGC	EGR1-HUMAN.H10MO.S
5.56414e-94	-3.16819	0.267	0.655	1.06831e-90	PGC	PITX2.SwissRegulon
6.81047e-94	1.63001	0.679	0.331	1.30761e-90	PGC	GSC.HOMER
1.9097e-93	-2.41878	0.242	0.607	3.66663e-90	PGC	FOXC2.SwissRegulon
2.01596e-93	-2.37088	0.264	0.623	3.87064e-90	PGC	EVX2-HUMAN.H10MO.A
6.11647e-93	-1.75533	0.282	0.642	1.17436e-89	PGC	CREB3L1.SwissRegulon
7.93489e-93	-2.62985	0.271	0.638	1.5235e-89	PGC	BMAL1.HOMER
1.0725e-92	-2.11592	0.27	0.658	2.05919e-89	PGC	CEBPA-HUMAN.H10MO.A
1.47377e-92	-1.76286	0.262	0.652	2.82963e-89	PGC	IRF8.SwissRegulon
1.48939e-92	-3.3469	0.242	0.597	2.85964e-89	PGC	GCM1.MA0646.1
5.42049e-92	-2.14194	0.275	0.622	1.04073e-88	PGC	RFX4.SwissRegulon
5.93663e-92	-2.20041	0.263	0.613	1.13983e-88	PGC	MAF.MAF-HUMAN.H10MO.B
5.93663e-92	-2.20041	0.263	0.613	1.13983e-88	PGC	MAF.MAF.SwissRegulon
1.23334e-91	-1.69661	0.272	0.64	2.36801e-88	PGC	BARHL1.SwissRegulon
1.24722e-91	-8.21855	0.164	0.516	2.39466e-88	PGC	HTF4-HUMAN.H10MO.B
1.70857e-91	2.59968	0.654	0.313	3.28045e-88	PGC	PO3F1-HUMAN.H10MO.C
4.63927e-91	-1.99554	0.278	0.634	8.9074e-88	PGC	BATF3-HUMAN.H10MO.D
8.84886e-91	-1.63587	0.296	0.632	1.69898e-87	PGC	NFAT:AP1.HOMER
1.15345e-90	-1.67846	0.269	0.656	2.21463e-87	PGC	DMBX1-HUMAN.H10MO.D
1.60458e-90	2.01786	0.69	0.315	3.08079e-87	PGC	TEAD2.HOMER
2.38193e-90	-1.49364	0.262	0.636	4.5733e-87	PGC	HOXD12.MA0873.1
1.09192e-89	-1.51013	0.301	0.653	2.09649e-86	PGC	SOX11-HUMAN.H10MO.D
1.20987e-89	1.5705	0.697	0.302	2.32295e-86	PGC	IRF4-HUMAN.H10MO.C
1.33304e-89	-1.79489	0.274	0.639	2.55944e-86	PGC	ZNF524.SwissRegulon
1.79262e-89	-1.63266	0.284	0.641	3.44183e-86	PGC	NKX32-HUMAN.H10MO.C
1.94187e-89	-2.02927	0.276	0.633	3.72839e-86	PGC	PBX2.MA1113.1
5.75411e-89	-3.03298	0.223	0.592	1.10479e-85	PGC	MBD2.SwissRegulon
1.23766e-88	-1.43165	0.299	0.629	2.3763e-85	PGC	HMGA2.SwissRegulon
3.0618e-88	1.48579	0.685	0.329	5.87866e-85	PGC	ZEP1-HUMAN.H10MO.D
1.25527e-87	-17.1455	0.194	0.538	2.41012e-84	PGC	GATA3.MA0037.3
2.08868e-87	-1.6773	0.293	0.658	4.01027e-84	PGC	LBX2.SwissRegulon
6.58161e-87	-2.66288	0.291	0.618	1.26367e-83	PGC	USF2.MA0526.2
7.4304e-87	-1.84276	0.296	0.641	1.42664e-83	PGC	HEB.HOMER
9.07397e-87	-3.13569	0.233	0.587	1.7422e-83	PGC	MBD2-HUMAN.H10MO.B
1.25932e-86	-3.60806	0.288	0.621	2.41789e-83	PGC	SOX15-HUMAN.H10MO.D
1.91996e-86	-2.10369	0.284	0.619	3.68633e-83	PGC	AR.SwissRegulon
1.98675e-86	-2.12639	0.261	0.614	3.81455e-83	PGC	ETV7.SwissRegulon
2.4309e-86	-1.89763	0.256	0.609	4.66733e-83	PGC	BPTF.SwissRegulon
3.26328e-86	-1.93773	0.295	0.638	6.26551e-83	PGC	SCRT2.SwissRegulon
1.46233e-85	-1.93046	0.291	0.638	2.80768e-82	PGC	MYBL2.SwissRegulon
5.08986e-85	-1.56441	0.297	0.641	9.77253e-82	PGC	CEBPG.MA0838.1
5.23283e-85	-1.90042	0.267	0.641	1.0047e-81	PGC	PAX3-HUMAN.H10MO.D
6.66374e-85	-3.21162	0.26	0.57	1.27944e-81	PGC	TYY1-HUMAN.H10MO.A
2.46808e-84	-1.59203	0.298	0.657	4.73871e-81	PGC	HOXA4.SwissRegulon
2.52819e-84	-15.8664	0.197	0.532	4.85413e-81	PGC	GATA3.HOMER
3.8614e-84	-14.4401	0.194	0.531	7.41389e-81	PGC	GATA1.SwissRegulon
8.75847e-84	-1.55465	0.273	0.622	1.68163e-80	PGC	POU4F1.SwissRegulon
1.34472e-83	-1.54747	0.294	0.639	2.58187e-80	PGC	DLX1.SwissRegulon
1.42498e-83	-1.77677	0.282	0.619	2.73596e-80	PGC	CREB3L2.SwissRegulon
5.64845e-83	-1.42768	0.288	0.655	1.0845e-79	PGC	LHX1.SwissRegulon
1.03248e-82	-1.66229	0.255	0.626	1.98237e-79	PGC	CHR.HOMER
1.12739e-82	-2.2791	0.285	0.612	2.16459e-79	PGC	KAISO-HUMAN.H10MO.S
1.3504e-82	-1.55638	0.285	0.614	2.59277e-79	PGC	NF1:FOXA1.HOMER
2.21514e-82	-1.65163	0.3	0.628	4.25308e-79	PGC	E4F1-HUMAN.H10MO.D
2.21514e-82	-1.65163	0.3	0.628	4.25308e-79	PGC	E4F1.SwissRegulon
3.17637e-82	-2.29514	0.287	0.64	6.09863e-79	PGC	HOXB7.SwissRegulon
3.55051e-82	-2.7823	0.282	0.622	6.81699e-79	PGC	PRDM4-HUMAN.H10MO.D
3.85641e-82	-1.73945	0.293	0.633	7.40431e-79	PGC	NPAS2.HOMER
9.85109e-82	-1.76048	0.288	0.654	1.89141e-78	PGC	MAX.MAX.SwissRegulon
1.27871e-81	1.0155	0.71	0.363	2.45513e-78	PGC	CLOCK-HUMAN.H10MO.D
1.72322e-81	-2.29657	0.283	0.615	3.30859e-78	PGC	NFY.HOMER
1.8692e-81	-2.26211	0.3	0.63	3.58886e-78	PGC	FOXL2.HOMER
6.06433e-81	-5.37724	0.241	0.558	1.16435e-77	PGC	KLF16.SwissRegulon
8.44544e-81	1.52257	0.689	0.32	1.62152e-77	PGC	ZN143-HUMAN.H10MO.A
1.15642e-80	-7.66931	0.22	0.53	2.22034e-77	PGC	MESP1.SwissRegulon
1.32631e-80	1.24822	0.695	0.328	2.54651e-77	PGC	NEUROD1.MA1109.1
2.22255e-80	1.73905	0.695	0.338	4.26729e-77	PGC	MZF1(var.2).MA0057.1
3.78228e-80	-1.60691	0.271	0.609	7.26198e-77	PGC	FOXQ1-HUMAN.H10MO.C
5.46859e-80	-2.66582	0.301	0.624	1.04997e-76	PGC	TFEC.SwissRegulon
8.35663e-80	1.50638	0.663	0.32	1.60447e-76	PGC	GSC2.MA0891.1
1.42639e-79	-2.00623	0.284	0.62	2.73866e-76	PGC	USF1.HOMER
2.51861e-79	-3.80601	0.24	0.581	4.83572e-76	PGC	ASCL2.SwissRegulon
2.58497e-79	-1.96038	0.275	0.611	4.96315e-76	PGC	PAX9.SwissRegulon
3.15591e-79	-2.2911	0.285	0.621	6.05936e-76	PGC	CDX2.MA0465.1
3.17875e-79	-4.37224	0.268	0.558	6.1032e-76	PGC	GLI1-HUMAN.H10MO.C
3.17875e-79	-4.37224	0.268	0.558	6.1032e-76	PGC	GLI1.SwissRegulon
4.09436e-79	-1.59587	0.277	0.649	7.86116e-76	PGC	BRAC-HUMAN.H10MO.D
5.07448e-79	1.57133	0.651	0.331	9.74299e-76	PGC	ETV4-HUMAN.H10MO.B
5.07448e-79	1.57133	0.651	0.331	9.74299e-76	PGC	ETV4.SwissRegulon
7.90888e-79	-1.69872	0.301	0.634	1.5185e-75	PGC	MUSC-HUMAN.H10MO.D
8.74628e-79	-1.69649	0.298	0.611	1.67928e-75	PGC	PAX6.HOMER
1.14273e-78	-2.2522	0.301	0.621	2.19404e-75	PGC	NR1D1-HUMAN.H10MO.C
1.27738e-78	-1.83287	0.306	0.636	2.45256e-75	PGC	SOX7-HUMAN.H10MO.D
2.77228e-78	-2.49265	0.256	0.582	5.32279e-75	PGC	ZBTB6-HUMAN.H10MO.D
3.15548e-78	-1.49265	0.275	0.627	6.05852e-75	PGC	CUX2-HUMAN.H10MO.D
3.57289e-78	-2.06236	0.286	0.594	6.85994e-75	PGC	ZSCAN4.MA1155.1
3.61061e-78	-1.94292	0.294	0.619	6.93237e-75	PGC	USF1.SwissRegulon
4.67213e-78	-12.4838	0.184	0.518	8.97049e-75	PGC	NKX21-HUMAN.H10MO.D
6.98703e-78	-1.52452	0.271	0.644	1.34151e-74	PGC	CEBP.HOMER
1.06831e-77	-2.90525	0.254	0.564	2.05115e-74	PGC	HESX1-HUMAN.H10MO.D
1.48273e-77	-2.56642	0.28	0.6	2.84683e-74	PGC	PAX7.SwissRegulon
1.61899e-77	-1.66672	0.292	0.604	3.10846e-74	PGC	BCL6B-HUMAN.H10MO.D
2.04693e-77	-1.94825	0.28	0.618	3.9301e-74	PGC	FOXJ1.SwissRegulon
7.26202e-77	-2.66275	0.288	0.605	1.39431e-73	PGC	E2F6.HOMER
1.21906e-76	1.24362	0.684	0.341	2.3406e-73	PGC	NR1I3-HUMAN.H10MO.C
1.21906e-76	1.24362	0.684	0.341	2.3406e-73	PGC	NR1I3.SwissRegulon
1.36955e-76	-1.64417	0.302	0.626	2.62954e-73	PGC	ONECUT3.MA0757.1
2.26676e-76	-1.37831	0.306	0.642	4.35217e-73	PGC	TEF.SwissRegulon
7.82633e-76	-1.82599	0.296	0.621	1.50266e-72	PGC	MYCN.MA0104.4
1.04596e-75	-1.97122	0.273	0.596	2.00825e-72	PGC	RFX5.SwissRegulon
1.50609e-75	-3.60612	0.271	0.568	2.8917e-72	PGC	GLIS2.SwissRegulon
1.90426e-75	2.49738	0.688	0.328	3.65617e-72	PGC	TEAD3.MA0808.1
2.20077e-75	1.48956	0.683	0.355	4.22548e-72	PGC	FOXK1-HUMAN.H10MO.D
3.34001e-75	-2.03287	0.278	0.606	6.41281e-72	PGC	GABP1-HUMAN.H10MO.C
4.85414e-75	-1.61922	0.285	0.625	9.31994e-72	PGC	HESX1.SwissRegulon
6.43874e-75	1.70559	0.671	0.31	1.23624e-71	PGC	GTF2F1.SwissRegulon
8.1506e-75	-1.60154	0.288	0.612	1.56491e-71	PGC	PAX2.SwissRegulon
8.80264e-75	-1.84775	0.283	0.637	1.69011e-71	PGC	E2F7.MA0758.1
1.54856e-74	1.62435	0.705	0.351	2.97323e-71	PGC	HOXB5.SwissRegulon
2.49116e-74	1.36264	0.654	0.329	4.78303e-71	PGC	PLAL1-HUMAN.H10MO.D
7.04156e-74	-1.41946	0.303	0.639	1.35198e-70	PGC	FOXN1.SwissRegulon
1.11714e-73	1.00296	0.667	0.325	2.14492e-70	PGC	GATA2-HUMAN.H10MO.A
1.87741e-73	-1.42487	0.292	0.622	3.60462e-70	PGC	FOXP3-HUMAN.H10MO.D
4.40489e-73	-1.5855	0.311	0.641	8.45739e-70	PGC	VAX2.SwissRegulon
4.75694e-73	1.46891	0.702	0.376	9.13332e-70	PGC	HNF4A-HUMAN.H10MO.A
6.01368e-73	-2.23142	0.292	0.609	1.15463e-69	PGC	ELK3.SwissRegulon
2.56406e-72	-1.3793	0.316	0.635	4.923e-69	PGC	IRF5.MA1420.1
7.02637e-72	-1.17944	0.317	0.627	1.34906e-68	PGC	LHX9-HUMAN.H10MO.D
7.63372e-72	-1.38921	0.296	0.626	1.46567e-68	PGC	PRRX1.SwissRegulon
7.63856e-72	-1.5337	0.316	0.621	1.4666e-68	PGC	VDR.SwissRegulon
1.14087e-71	-3.68333	0.256	0.559	2.19047e-68	PGC	SUH-HUMAN.H10MO.C
1.35534e-71	-12.2775	0.199	0.516	2.60224e-68	PGC	NKX2-1.SwissRegulon
2.93817e-71	-0.308002	0.284	0.646	5.64129e-68	PGC	VSX1-HUMAN.H10MO.D
6.34078e-71	-1.62929	0.292	0.627	1.21743e-67	PGC	PRDM1.SwissRegulon
8.59754e-71	-1.59876	0.311	0.613	1.65073e-67	PGC	CEBPE-HUMAN.H10MO.A
9.14641e-71	1.13391	0.692	0.347	1.75611e-67	PGC	KLF5.HOMER
4.69e-70	-0.898946	0.305	0.63	9.0048e-67	PGC	HMGA2-HUMAN.H10MO.D
5.41604e-70	-2.63429	0.269	0.58	1.03988e-66	PGC	ZNF8.SwissRegulon
6.52657e-70	1.16885	0.687	0.352	1.2531e-66	PGC	HOXA1.SwissRegulon
2.37698e-69	-1.54446	0.318	0.627	4.5638e-66	PGC	CR3L1-HUMAN.H10MO.D
3.81613e-69	-2.043	0.287	0.614	7.32698e-66	PGC	BARX2-HUMAN.H10MO.D
4.4384e-69	-1.52889	0.297	0.623	8.52173e-66	PGC	ELK1.SwissRegulon
6.1899e-69	1.33952	0.664	0.337	1.18846e-65	PGC	HNF4A.SwissRegulon
6.82788e-69	1.11934	0.664	0.334	1.31095e-65	PGC	P73-HUMAN.H10MO.A
1.54114e-68	-1.62168	0.298	0.609	2.95899e-65	PGC	FOXD3-HUMAN.H10MO.D
1.54114e-68	-1.62168	0.298	0.609	2.95899e-65	PGC	FOXD3.SwissRegulon
1.60526e-68	-2.37954	0.312	0.612	3.0821e-65	PGC	MITF.HOMER
2.46566e-68	1.23181	0.657	0.35	4.73407e-65	PGC	TBX5.SwissRegulon
2.50557e-68	-1.42937	0.314	0.641	4.81069e-65	PGC	MEF2C-HUMAN.H10MO.C
2.92067e-68	-2.31956	0.323	0.656	5.60769e-65	PGC	MGA.SwissRegulon
2.92067e-68	-2.31956	0.323	0.656	5.60769e-65	PGC	TBX4.SwissRegulon
3.10691e-68	1.39772	0.652	0.348	5.96527e-65	PGC	SOX4.SwissRegulon
3.14154e-68	0.869355	0.672	0.319	6.03176e-65	PGC	GATA4-HUMAN.H10MO.B
4.56882e-68	-1.70174	0.281	0.614	8.77214e-65	PGC	PIT1-HUMAN.H10MO.C
5.27911e-68	-2.72354	0.284	0.578	1.01359e-64	PGC	ZBTB6.SwissRegulon
6.44124e-68	-1.64513	0.317	0.629	1.23672e-64	PGC	FOXH1-HUMAN.H10MO.A
1.18966e-67	-1.62528	0.308	0.616	2.28414e-64	PGC	ONECUT2.MA0756.1
1.26188e-67	-1.57801	0.321	0.629	2.42282e-64	PGC	GLIS1-HUMAN.H10MO.D
2.83533e-67	-1.7897	0.314	0.627	5.44384e-64	PGC	SOX4.MA0867.1
3.98452e-67	-1.73666	0.303	0.596	7.65028e-64	PGC	ZN384-HUMAN.H10MO.C
4.75872e-67	-1.42668	0.304	0.618	9.13675e-64	PGC	NKX61-HUMAN.H10MO.D
5.29982e-67	-2.29629	0.284	0.59	1.01757e-63	PGC	ZSCA4-HUMAN.H10MO.D
8.26719e-67	-1.44966	0.322	0.622	1.5873e-63	PGC	GMEB2-HUMAN.H10MO.D
1.24348e-66	-1.40472	0.311	0.629	2.38749e-63	PGC	IRF4.SwissRegulon
1.99862e-66	-2.15827	0.287	0.587	3.83734e-63	PGC	FOXJ3.SwissRegulon
2.19682e-66	-1.28134	0.306	0.616	4.21789e-63	PGC	SPDEF-HUMAN.H10MO.D
2.21984e-66	-2.14021	0.295	0.583	4.26209e-63	PGC	ELF1-HUMAN.H10MO.A
4.29831e-66	-1.13676	0.31	0.641	8.25276e-63	PGC	ONEC2-HUMAN.H10MO.D
6.02479e-66	-1.41602	0.314	0.631	1.15676e-62	PGC	CENPB-HUMAN.H10MO.D
8.43762e-66	1.39063	0.631	0.314	1.62002e-62	PGC	STAT3.MA0144.2
1.11863e-65	-1.45344	0.301	0.61	2.14778e-62	PGC	IRF:BATF.HOMER
1.14139e-65	-1.50003	0.307	0.63	2.19147e-62	PGC	GLIS1.MA0735.1
1.4593e-65	-2.75887	0.29	0.584	2.80185e-62	PGC	MITF.MA0620.2
1.76223e-65	-1.49023	0.316	0.615	3.38348e-62	PGC	ETV1.SwissRegulon
1.88253e-65	-1.58016	0.293	0.612	3.61446e-62	PGC	ERG-HUMAN.H10MO.B
2.22773e-65	-3.92437	0.287	0.598	4.27725e-62	PGC	NFIA.MA0670.1
2.95076e-65	-1.53732	0.32	0.634	5.66546e-62	PGC	HOXD11.SwissRegulon
3.16172e-65	-1.10397	0.3	0.641	6.0705e-62	PGC	ISX-HUMAN.H10MO.D
5.37008e-65	-1.73883	0.302	0.586	1.03106e-61	PGC	ZNF384.SwissRegulon
1.1197e-64	-1.51991	0.286	0.609	2.14982e-61	PGC	PO4F1-HUMAN.H10MO.D
1.16534e-64	-3.58316	0.27	0.547	2.23745e-61	PGC	OLIG2.SwissRegulon
1.27873e-64	-1.3075	0.303	0.609	2.45516e-61	PGC	POU3F4.SwissRegulon
1.3844e-64	-1.39784	0.324	0.62	2.65805e-61	PGC	HOXA10.SwissRegulon
1.41662e-64	-1.11353	0.324	0.638	2.71991e-61	PGC	AMYB.HOMER
1.70267e-64	-1.31922	0.305	0.633	3.26913e-61	PGC	BSH-HUMAN.H10MO.D
2.13225e-64	-1.43232	0.322	0.624	4.09393e-61	PGC	HBP1.SwissRegulon
4.23401e-64	-6.81738	0.267	0.525	8.1293e-61	PGC	GSC.SwissRegulon
5.45127e-64	-2.12848	0.303	0.608	1.04664e-60	PGC	USF1.MA0093.2
6.59454e-64	1.28496	0.659	0.346	1.26615e-60	PGC	GSC.MA0648.1
7.22925e-64	-1.54075	0.308	0.614	1.38802e-60	PGC	KLF6-HUMAN.H10MO.D
7.22925e-64	-1.54075	0.308	0.614	1.38802e-60	PGC	KLF6.SwissRegulon
2.35359e-63	1.25127	0.665	0.355	4.51888e-60	PGC	P53-HUMAN.H10MO.B
2.6313e-63	-1.60104	0.305	0.607	5.05209e-60	PGC	MAFF.MAFF.SwissRegulon
2.96456e-63	-5.95528	0.277	0.538	5.69196e-60	PGC	RHXF1-HUMAN.H10MO.D
4.99959e-63	1.35253	0.654	0.367	9.59922e-60	PGC	RXR.HOMER
5.36294e-63	1.40624	0.642	0.335	1.02968e-59	PGC	TEAD.HOMER
6.47817e-63	-1.24089	0.312	0.62	1.24381e-59	PGC	CREB3L1.MA0839.1
8.3164e-63	1.44612	0.638	0.323	1.59675e-59	PGC	ZBTB18.MA0698.1
1.15952e-62	-1.29125	0.319	0.604	2.22627e-59	PGC	THRB.SwissRegulon
1.30401e-62	-1.55582	0.343	0.612	2.5037e-59	PGC	LHX6.SwissRegulon
1.93247e-62	-1.33293	0.339	0.635	3.71034e-59	PGC	HMX2.SwissRegulon
3.28886e-62	-1.22341	0.307	0.614	6.31461e-59	PGC	CLOCK.SwissRegulon
3.61919e-62	-1.52766	0.315	0.625	6.94884e-59	PGC	ONEC3-HUMAN.H10MO.D
5.95104e-62	-3.54251	0.282	0.553	1.1426e-58	PGC	PRDM4.SwissRegulon
7.60509e-62	-1.30922	0.325	0.614	1.46018e-58	PGC	FOXA1-HUMAN.H10MO.A
9.64395e-62	-1.39824	0.339	0.64	1.85164e-58	PGC	MEIS1-HUMAN.H10MO.C
1.19937e-61	-1.90438	0.295	0.596	2.30279e-58	PGC	ZIC4.MA0751.1
1.19993e-61	-2.12626	0.293	0.59	2.30387e-58	PGC	BPTF-HUMAN.H10MO.D
1.92978e-61	1.26614	0.636	0.35	3.70518e-58	PGC	PITX1-HUMAN.H10MO.D
1.9863e-61	-1.89235	0.302	0.595	3.8137e-58	PGC	CREB1-HUMAN.H10MO.A
2.24371e-61	-2.79084	0.283	0.574	4.30793e-58	PGC	ZBTB3.SwissRegulon
3.40378e-61	1.08008	0.653	0.36	6.53525e-58	PGC	HXA1-HUMAN.H10MO.C
3.57912e-61	-2.97008	0.261	0.555	6.87191e-58	PGC	MYF6-HUMAN.H10MO.C
4.0882e-61	-1.77441	0.322	0.592	7.84935e-58	PGC	BMAL1-HUMAN.H10MO.C
6.80957e-61	-2.1823	0.296	0.602	1.30744e-57	PGC	ETS1-HUMAN.H10MO.C
9.37424e-61	-1.62347	0.317	0.608	1.79985e-57	PGC	ARNTL.SwissRegulon
9.75417e-61	-1.56156	0.314	0.597	1.8728e-57	PGC	MNT.SwissRegulon
1.11494e-60	-1.74146	0.301	0.603	2.14069e-57	PGC	SREBF1.SwissRegulon
1.18244e-60	-1.33815	0.325	0.625	2.27029e-57	PGC	HLX.SwissRegulon
2.80016e-60	-1.29725	0.312	0.608	5.37631e-57	PGC	PAX6.SwissRegulon
2.91303e-60	-1.65825	0.331	0.608	5.59302e-57	PGC	MITF.SwissRegulon
3.24041e-60	-2.33254	0.29	0.567	6.22158e-57	PGC	ARNT2-HUMAN.H10MO.D
6.62954e-60	-2.97542	0.306	0.559	1.27287e-56	PGC	SP1.SwissRegulon
2.01017e-59	-1.68063	0.298	0.601	3.85953e-56	PGC	ATF1.SwissRegulon
3.71895e-59	-1.29617	0.313	0.625	7.14038e-56	PGC	MEIS3.SwissRegulon
3.81969e-59	1.21976	0.634	0.365	7.3338e-56	PGC	PITX3.SwissRegulon
4.11338e-59	-1.67894	0.332	0.605	7.89769e-56	PGC	DUX4.MA0468.1
4.1815e-59	-1.4997	0.315	0.609	8.02848e-56	PGC	FOXJ2.SwissRegulon
6.17463e-59	-0.813264	0.326	0.632	1.18553e-55	PGC	GSX1.SwissRegulon
6.52278e-59	-1.70947	0.325	0.623	1.25237e-55	PGC	SMRC1-HUMAN.H10MO.D
7.52141e-59	-1.33142	0.319	0.598	1.44411e-55	PGC	FOXC1.MA0032.2
1.1968e-58	-1.22781	0.337	0.607	2.29786e-55	PGC	LHX5.SwissRegulon
1.97604e-58	-1.66836	0.293	0.592	3.79399e-55	PGC	SPZ1-HUMAN.H10MO.D
2.46421e-58	-1.56384	0.316	0.585	4.73128e-55	PGC	HXB2-HUMAN.H10MO.D
2.48716e-58	-1.48994	0.319	0.581	4.77535e-55	PGC	GLIS3.SwissRegulon
2.54369e-58	-1.55552	0.3	0.592	4.88388e-55	PGC	GCM2.SwissRegulon
3.59691e-58	-1.42989	0.314	0.595	6.90607e-55	PGC	ARX-HUMAN.H10MO.D
4.36555e-58	1.33945	0.637	0.382	8.38186e-55	PGC	TBX4.MA0806.1
4.36555e-58	1.33945	0.637	0.382	8.38186e-55	PGC	TBX5.MA0807.1
5.78684e-58	-1.17323	0.334	0.616	1.11107e-54	PGC	NKX3-2.SwissRegulon
5.79802e-58	-1.65569	0.33	0.605	1.11322e-54	PGC	MTF1-HUMAN.H10MO.C
7.52341e-58	-2.55585	0.265	0.562	1.4445e-54	PGC	GCM1-HUMAN.H10MO.D
1.2253e-57	0.562786	0.683	0.357	2.35257e-54	PGC	KLF4-HUMAN.H10MO.A
1.2253e-57	0.562786	0.683	0.357	2.35257e-54	PGC	KLF4.SwissRegulon
1.72291e-57	1.92833	0.639	0.339	3.30799e-54	PGC	POU3F1.SwissRegulon
1.8504e-57	-1.68932	0.322	0.62	3.55277e-54	PGC	SRF-HUMAN.H10MO.A
3.77379e-57	1.23582	0.66	0.369	7.24567e-54	PGC	PAX4.SwissRegulon
5.80856e-57	-1.8036	0.303	0.599	1.11524e-53	PGC	ETV7-HUMAN.H10MO.D
6.35211e-57	-15.7182	0.253	0.5	1.2196e-53	PGC	GATA5.MA0766.1
7.74209e-57	-1.37239	0.33	0.616	1.48648e-53	PGC	VENTX.SwissRegulon
9.06765e-57	1.15125	0.637	0.347	1.74099e-53	PGC	NFKB2-HUMAN.H10MO.D
9.48773e-57	-1.09681	0.307	0.596	1.82164e-53	PGC	LMX1A.SwissRegulon
1.83517e-56	-1.99658	0.326	0.573	3.52352e-53	PGC	KLF12.SwissRegulon
1.98142e-56	-1.70548	0.318	0.616	3.80432e-53	PGC	SOX8-HUMAN.H10MO.D
2.07236e-56	-4.65985	0.258	0.512	3.97894e-53	PGC	T.SwissRegulon
2.25225e-56	-1.23842	0.341	0.605	4.32433e-53	PGC	IRF6.SwissRegulon
4.18456e-56	1.1091	0.653	0.373	8.03436e-53	PGC	SMAD1.SwissRegulon
4.21695e-56	1.1561	0.646	0.337	8.09654e-53	PGC	PPARG.SwissRegulon
4.36658e-56	-1.33643	0.317	0.595	8.38382e-53	PGC	BARH1-HUMAN.H10MO.D
5.66927e-56	1.04695	0.676	0.381	1.0885e-52	PGC	SMARCC1.SwissRegulon
6.35406e-56	-1.30325	0.339	0.609	1.21998e-52	PGC	HOXC11.SwissRegulon
6.8093e-56	-1.76959	0.308	0.591	1.30739e-52	PGC	ZBTB49.SwissRegulon
8.43636e-56	-1.28312	0.312	0.614	1.61978e-52	PGC	CLOCK.MA0819.1
8.82703e-56	-0.119638	0.29	0.598	1.69479e-52	PGC	RFX.HOMER
1.05433e-55	-4.96625	0.268	0.514	2.02432e-52	PGC	MYF6.SwissRegulon
1.41811e-55	1.05292	0.658	0.367	2.72277e-52	PGC	ZIC1-HUMAN.H10MO.B
2.08972e-55	1.03194	0.656	0.365	4.01227e-52	PGC	HME2-HUMAN.H10MO.D
2.98034e-55	-1.03458	0.324	0.602	5.72226e-52	PGC	NRL.SwissRegulon
3.13559e-55	-14.7171	0.215	0.471	6.02034e-52	PGC	GATA4.SwissRegulon
3.48543e-55	-1.31374	0.324	0.586	6.69203e-52	PGC	SMAD3.SwissRegulon
4.49321e-55	1.18989	0.627	0.349	8.62695e-52	PGC	RBPJ.MA1116.1
4.72085e-55	-2.85616	0.346	0.598	9.06403e-52	PGC	NR1I3-HUMAN.H10MO.S
5.66454e-55	-1.31343	0.336	0.615	1.08759e-51	PGC	GRHL1.SwissRegulon
1.3313e-54	1.03532	0.648	0.354	2.5561e-51	PGC	MCR-HUMAN.H10MO.D
1.90866e-54	1.15101	0.635	0.363	3.66464e-51	PGC	P63-HUMAN.H10MO.S
3.69403e-54	-1.30265	0.331	0.612	7.09254e-51	PGC	HNF1A-HUMAN.H10MO.A
3.71534e-54	-1.66057	0.324	0.609	7.13345e-51	PGC	CREB3.MA0638.1
7.88745e-54	-1.33853	0.317	0.614	1.51439e-50	PGC	MYB-HUMAN.H10MO.C
1.13862e-53	-3.16124	0.288	0.557	2.18614e-50	PGC	TCF7L2.SwissRegulon
1.20746e-53	1.10943	0.679	0.401	2.31833e-50	PGC	NR2C2.MA0504.1
1.25216e-53	-1.39113	0.314	0.596	2.40416e-50	PGC	ZN713-HUMAN.H10MO.D
1.30398e-53	-1.64406	0.323	0.637	2.50364e-50	PGC	HXD4-HUMAN.H10MO.D
1.45032e-53	-1.02927	0.335	0.614	2.78461e-50	PGC	ZNF675.HOMER
2.12815e-53	-1.36684	0.324	0.612	4.08606e-50	PGC	CREB3.SwissRegulon
2.22032e-53	-1.53993	0.335	0.591	4.26302e-50	PGC	MITF-HUMAN.H10MO.C
6.24249e-53	-1.77867	0.312	0.584	1.19856e-49	PGC	RUNX3.MA0684.1
6.97476e-53	-1.25978	0.33	0.595	1.33915e-49	PGC	EGR1.SwissRegulon
8.8781e-53	-0.858136	0.324	0.608	1.7046e-49	PGC	DRGX.SwissRegulon
9.91605e-53	-1.22773	0.354	0.59	1.90388e-49	PGC	ZFHX3-HUMAN.H10MO.D
1.44463e-52	-2.87321	0.318	0.544	2.77369e-49	PGC	SP1-HUMAN.H10MO.S
1.94415e-52	-2.11798	0.305	0.59	3.73278e-49	PGC	ZIC1.MA0696.1
3.92961e-52	1.08332	0.64	0.371	7.54486e-49	PGC	PRDM14.SwissRegulon
3.9468e-52	-1.08676	0.333	0.626	7.57787e-49	PGC	PO6F1-HUMAN.H10MO.D
4.02687e-52	-3.51829	0.324	0.566	7.7316e-49	PGC	ZIC2-HUMAN.H10MO.C
4.76986e-52	-2.48737	0.297	0.567	9.15812e-49	PGC	PBX3.SwissRegulon
5.60014e-52	-1.33723	0.35	0.603	1.07523e-48	PGC	TEF.MA0843.1
6.39429e-52	1.06017	0.653	0.377	1.2277e-48	PGC	RHOXF1.MA0719.1
6.39998e-52	-0.741832	0.307	0.61	1.2288e-48	PGC	PHOX2A.SwissRegulon
9.56777e-52	-1.12832	0.342	0.621	1.83701e-48	PGC	HNF6.HOMER
9.58864e-52	1.12506	0.64	0.364	1.84102e-48	PGC	NFKB2.MA0778.1
9.77872e-52	-1.53773	0.324	0.595	1.87751e-48	PGC	ETV3.SwissRegulon
1.15194e-51	-1.59999	0.326	0.604	2.21172e-48	PGC	HXB7-HUMAN.H10MO.C
1.46574e-51	0.823652	0.648	0.366	2.81422e-48	PGC	FIGLA.MA0820.1
1.87276e-51	-1.80852	0.317	0.573	3.59571e-48	PGC	EGR4-HUMAN.H10MO.D
2.65972e-51	1.11401	0.64	0.357	5.10666e-48	PGC	NR1I2-HUMAN.H10MO.C
2.80799e-51	-1.50619	0.344	0.626	5.39135e-48	PGC	DDIT3.SwissRegulon
3.45979e-51	-1.20726	0.336	0.627	6.64279e-48	PGC	HOXA13.MA0650.1
7.69043e-51	1.2748	0.658	0.368	1.47656e-47	PGC	MNT-HUMAN.H10MO.D
1.16321e-50	-1.01403	0.345	0.608	2.23336e-47	PGC	TBX19.MA0804.1
1.60124e-50	-1.20073	0.327	0.593	3.07438e-47	PGC	FOXK2.HOMER
3.53732e-50	-1.19716	0.34	0.604	6.79166e-47	PGC	HNF1A.SwissRegulon
3.66901e-50	1.17308	0.633	0.377	7.0445e-47	PGC	BHE23-HUMAN.H10MO.D
7.41201e-50	-0.96579	0.319	0.619	1.42311e-46	PGC	MSX2-HUMAN.H10MO.D
1.15397e-49	-1.07136	0.335	0.62	2.21562e-46	PGC	HXA10-HUMAN.H10MO.C
1.53117e-49	-1.19765	0.346	0.63	2.93985e-46	PGC	CDX2.SwissRegulon
1.8557e-49	-1.51003	0.337	0.581	3.56294e-46	PGC	E2F1-HUMAN.H10MO.A
3.3541e-49	-3.36662	0.285	0.509	6.43987e-46	PGC	ZNF692.HOMER
5.73437e-49	-1.25978	0.326	0.609	1.101e-45	PGC	MNX1.SwissRegulon
6.94479e-49	-1.10661	0.341	0.611	1.3334e-45	PGC	MEIS3-HUMAN.H10MO.D
7.01147e-49	-1.05783	0.321	0.596	1.3462e-45	PGC	SP100.SwissRegulon
8.03312e-49	-1.44925	0.333	0.592	1.54236e-45	PGC	YY2.SwissRegulon
9.70592e-49	-1.14318	0.322	0.602	1.86354e-45	PGC	TP63.MA0525.2
1.90237e-48	0.884895	0.617	0.363	3.65256e-45	PGC	RELB-HUMAN.H10MO.C
1.90237e-48	0.884895	0.617	0.363	3.65256e-45	PGC	RELB.SwissRegulon
5.0921e-48	-1.05974	0.337	0.6	9.77684e-45	PGC	CUX2.SwissRegulon
5.4548e-48	-1.1663	0.331	0.61	1.04732e-44	PGC	PHX2A-HUMAN.H10MO.D
5.79075e-48	1.14711	0.657	0.401	1.11182e-44	PGC	COT1-HUMAN.H10MO.B
5.90751e-48	1.05684	0.661	0.391	1.13424e-44	PGC	NR2C2.SwissRegulon
6.99396e-48	-1.21684	0.341	0.603	1.34284e-44	PGC	BARX1-HUMAN.H10MO.D
1.22322e-47	-1.57547	0.326	0.607	2.34858e-44	PGC	ONECUT1.MA0679.1
1.26899e-47	-1.23507	0.336	0.603	2.43645e-44	PGC	ZN232-HUMAN.H10MO.D
2.06229e-47	-1.4661	0.331	0.589	3.9596e-44	PGC	RUNX3-HUMAN.H10MO.C
2.29412e-47	-2.12336	0.346	0.578	4.40472e-44	PGC	FOXD1-HUMAN.H10MO.D
2.62333e-47	-2.56059	0.316	0.547	5.0368e-44	PGC	ZBTB7A.SwissRegulon
2.96503e-47	-1.32573	0.339	0.6	5.69285e-44	PGC	BARHL2.MA0635.1
3.08546e-47	1.18232	0.635	0.372	5.92408e-44	PGC	PITX3-HUMAN.H10MO.D
4.08701e-47	1.08789	0.634	0.374	7.84706e-44	PGC	COT1-HUMAN.H10MO.S
7.58969e-47	-1.03649	0.353	0.608	1.45722e-43	PGC	EGR4.SwissRegulon
8.98452e-47	1.59932	0.643	0.364	1.72503e-43	PGC	MTA3.SwissRegulon
1.03207e-46	-0.713276	0.316	0.611	1.98157e-43	PGC	HOXD4.SwissRegulon
1.38727e-46	-1.36658	0.304	0.592	2.66355e-43	PGC	ATF7-HUMAN.H10MO.D
2.58901e-46	1.12625	0.638	0.375	4.9709e-43	PGC	P73-HUMAN.H10MO.S
2.58901e-46	1.12625	0.638	0.375	4.9709e-43	PGC	TP73.SwissRegulon
2.83152e-46	-0.96495	0.359	0.608	5.43652e-43	PGC	HOXC4.SwissRegulon
3.61921e-46	1.04889	0.64	0.354	6.94889e-43	PGC	ASCL2-HUMAN.H10MO.D
3.6285e-46	0.911441	0.61	0.348	6.96673e-43	PGC	TWIST1.MA1123.1
3.73551e-46	-1.12654	0.339	0.599	7.17218e-43	PGC	ZBED1.MA0749.1
5.28472e-46	-1.27313	0.305	0.574	1.01467e-42	PGC	IRF3-HUMAN.H10MO.C
6.47622e-46	-1.32518	0.318	0.57	1.24343e-42	PGC	FOSL1::JUND(var.2).MA1143.1
7.03125e-46	-1.31244	0.326	0.61	1.35e-42	PGC	MIXL1.SwissRegulon
7.33506e-46	-1.45726	0.323	0.572	1.40833e-42	PGC	GCM2.MA0767.1
7.73561e-46	-2.37084	0.321	0.551	1.48524e-42	PGC	NKX1-1.SwissRegulon
8.79723e-46	-2.59679	0.314	0.571	1.68907e-42	PGC	NFIX.MA0671.1
1.2926e-45	-2.46285	0.31	0.544	2.48179e-42	PGC	HSF1.SwissRegulon
1.33092e-45	1.01312	0.635	0.398	2.55538e-42	PGC	NR2C2-HUMAN.H10MO.A
2.04449e-45	-0.279823	0.33	0.612	3.92542e-42	PGC	BSX.MA0876.1
2.58832e-45	-1.43214	0.341	0.578	4.96957e-42	PGC	GFY.HOMER
5.32209e-45	-1.04321	0.352	0.614	1.02184e-41	PGC	ISL2.MA0914.1
6.5579e-45	-1.18802	0.359	0.609	1.25912e-41	PGC	TBX4-HUMAN.H10MO.D
8.0458e-45	-1.24148	0.354	0.607	1.54479e-41	PGC	SOX21.MA0866.1
9.29843e-45	-1.31592	0.348	0.599	1.7853e-41	PGC	HOXA5.MA0158.1
1.15083e-44	0.904563	0.644	0.389	2.2096e-41	PGC	RREB1-HUMAN.H10MO.D
1.15083e-44	0.904563	0.644	0.389	2.2096e-41	PGC	RREB1.SwissRegulon
1.30427e-44	-0.985016	0.333	0.595	2.5042e-41	PGC	PROP1.MA0715.1
2.09887e-44	-1.18062	0.347	0.59	4.02982e-41	PGC	VENTX-HUMAN.H10MO.D
2.25664e-44	-1.32232	0.34	0.594	4.33275e-41	PGC	VDR.HOMER
2.3947e-44	1.12563	0.645	0.375	4.59783e-41	PGC	NDF2-HUMAN.H10MO.D
2.63953e-44	-1.43088	0.346	0.599	5.06789e-41	PGC	HNF1B-HUMAN.H10MO.B
2.77396e-44	-1.15024	0.369	0.589	5.326e-41	PGC	SOX7.SwissRegulon
2.82784e-44	1.00546	0.622	0.37	5.42945e-41	PGC	NEUROG2.SwissRegulon
3.49949e-44	-1.31784	0.333	0.572	6.71903e-41	PGC	ZKSC3-HUMAN.H10MO.D
4.1103e-44	1.78644	0.635	0.39	7.89178e-41	PGC	HXD8-HUMAN.H10MO.D
7.29672e-44	-1.23207	0.346	0.597	1.40097e-40	PGC	MAFF.MAFF-HUMAN.H10MO.A
8.46992e-44	-1.13248	0.348	0.582	1.62622e-40	PGC	HXC13-HUMAN.H10MO.D
8.63785e-44	-1.48176	0.329	0.586	1.65847e-40	PGC	PO4F3-HUMAN.H10MO.D
1.15701e-43	-1.54	0.344	0.562	2.22145e-40	PGC	E2F3.MA0469.2
1.31673e-43	-1.08061	0.34	0.584	2.52812e-40	PGC	ZBED1-HUMAN.H10MO.D
1.41541e-43	0.987302	0.613	0.366	2.71759e-40	PGC	PITX3.MA0714.1
2.63551e-43	-1.07836	0.348	0.605	5.06017e-40	PGC	DRGX-HUMAN.H10MO.D
2.79123e-43	-3.47585	0.356	0.58	5.35915e-40	PGC	NR2F1.MA0017.2
3.09189e-43	-1.37021	0.349	0.597	5.93643e-40	PGC	DBP.MA0639.1
3.17101e-43	-1.67353	0.343	0.584	6.08833e-40	PGC	ID4.SwissRegulon
3.40058e-43	0.378251	0.302	0.61	6.52911e-40	PGC	MSX1.MA0666.1
4.9015e-43	-1.42514	0.324	0.577	9.41089e-40	PGC	SOX14.SwissRegulon
5.57257e-43	-0.823218	0.328	0.575	1.06993e-39	PGC	LMX1B-HUMAN.H10MO.D
5.66878e-43	-2.65844	0.35	0.598	1.08841e-39	PGC	RARA.MA0729.1
7.12475e-43	-1.84367	0.308	0.568	1.36795e-39	PGC	MSC.MA0665.1
7.91965e-43	1.29133	0.636	0.369	1.52057e-39	PGC	TEAD3.SwissRegulon
9.62683e-43	2.16744	0.62	0.347	1.84835e-39	PGC	TEAD2.MA1121.1
9.99374e-43	-1.21849	0.355	0.57	1.9188e-39	PGC	NFAC1-HUMAN.H10MO.A
1.01649e-42	-1.05755	0.346	0.602	1.95165e-39	PGC	CEBPD-HUMAN.H10MO.B
1.02403e-42	-1.14432	0.335	0.629	1.96615e-39	PGC	DLX6.SwissRegulon
1.21252e-42	-1.10732	0.339	0.578	2.32804e-39	PGC	CR3L2-HUMAN.H10MO.D
1.29144e-42	-0.95764	0.352	0.619	2.47956e-39	PGC	HOXC5.SwissRegulon
1.70201e-42	-1.37327	0.332	0.555	3.26785e-39	PGC	HOMEZ.SwissRegulon
1.78612e-42	1.12077	0.621	0.389	3.42936e-39	PGC	OTX1-HUMAN.H10MO.D
1.81101e-42	-1.28524	0.329	0.57	3.47714e-39	PGC	HOXC12.MA0906.1
2.09527e-42	-1.08676	0.358	0.593	4.02291e-39	PGC	ZNF410.SwissRegulon
2.14556e-42	-1.1081	0.356	0.607	4.11948e-39	PGC	LHX8.SwissRegulon
2.24385e-42	-1.06129	0.332	0.607	4.30819e-39	PGC	POU3F3.SwissRegulon
2.4636e-42	0.859772	0.641	0.386	4.7301e-39	PGC	MESP1-HUMAN.H10MO.D
2.971e-42	0.954527	0.634	0.382	5.70432e-39	PGC	ZFP3.HOMER
4.229e-42	-1.08163	0.37	0.608	8.11967e-39	PGC	HOXA5.SwissRegulon
8.5195e-42	-1.08267	0.35	0.6	1.63574e-38	PGC	HOXC10.SwissRegulon
1.00762e-41	-1.50325	0.344	0.563	1.93464e-38	PGC	NFATC2.MA0152.1
1.00762e-41	-1.50325	0.344	0.563	1.93464e-38	PGC	NFATC2.SwissRegulon
1.11604e-41	-0.990416	0.333	0.597	2.14279e-38	PGC	DLX5-HUMAN.H10MO.D
1.23722e-41	2.1552	0.624	0.353	2.37547e-38	PGC	TEAD4.MA0809.1
1.33375e-41	-1.05231	0.345	0.603	2.5608e-38	PGC	CLOCK.HOMER
1.95498e-41	-1.37582	0.346	0.573	3.75357e-38	PGC	GLIS2-HUMAN.H10MO.D
2.01985e-41	-1.00581	0.349	0.606	3.8781e-38	PGC	TGIF2-HUMAN.H10MO.D
2.60966e-41	1.01864	0.621	0.387	5.01054e-38	PGC	MGA.MA0801.1
2.60966e-41	1.01864	0.621	0.387	5.01054e-38	PGC	TBX15.MA0803.1
2.60966e-41	1.01864	0.621	0.387	5.01054e-38	PGC	TBX15.SwissRegulon
3.49289e-41	2.20719	0.618	0.319	6.70634e-38	PGC	TFAP2A.SwissRegulon
4.96942e-41	0.947382	0.64	0.392	9.54128e-38	PGC	SOX1-HUMAN.H10MO.D
1.38476e-40	0.162334	0.345	0.586	2.65874e-37	PGC	BARX1.MA0875.1
1.87297e-40	-1.22558	0.347	0.572	3.59609e-37	PGC	NFAC4-HUMAN.H10MO.C
1.87297e-40	-1.22558	0.347	0.572	3.59609e-37	PGC	NFATC4.SwissRegulon
4.59366e-40	-0.805226	0.364	0.598	8.81982e-37	PGC	NFIL3-HUMAN.H10MO.C
4.60258e-40	1.04399	0.607	0.365	8.83696e-37	PGC	TFCP2.SwissRegulon
4.72692e-40	0.536224	0.618	0.361	9.07568e-37	PGC	JUNB.MA0490.1
5.70808e-40	0.930012	0.646	0.398	1.09595e-36	PGC	ZN148-HUMAN.H10MO.D
6.19417e-40	-0.793226	0.362	0.61	1.18928e-36	PGC	GMEB2.SwissRegulon
6.95982e-40	-3.53896	0.321	0.532	1.33629e-36	PGC	GFI1B-HUMAN.H10MO.C
7.28166e-40	0.953705	0.625	0.391	1.39808e-36	PGC	HDX.SwissRegulon
9.83133e-40	-1.14455	0.353	0.561	1.88761e-36	PGC	GRHL2.HOMER
1.25812e-39	-0.735841	0.327	0.594	2.41558e-36	PGC	HXB3-HUMAN.H10MO.D
1.37453e-39	-1.21972	0.346	0.57	2.63909e-36	PGC	PU.1:IRF8.HOMER
1.4236e-39	-1.30651	0.337	0.586	2.7333e-36	PGC	E2F4-HUMAN.H10MO.A
2.98815e-39	-11.8783	0.286	0.485	5.73725e-36	PGC	GATA2.MA0036.3
3.06209e-39	-3.30629	0.284	0.53	5.87921e-36	PGC	ASCL1.MA1100.1
3.23742e-39	-1.04096	0.334	0.592	6.21585e-36	PGC	ZFHX3.SwissRegulon
3.53267e-39	0.943324	0.617	0.365	6.78273e-36	PGC	SMAD1-HUMAN.H10MO.D
3.54858e-39	-1.50965	0.36	0.582	6.81328e-36	PGC	ZNF136.HOMER
4.01963e-39	-1.19651	0.339	0.583	7.71769e-36	PGC	E2F8.MA0865.1
4.77232e-39	-1.00906	0.343	0.589	9.16286e-36	PGC	MYBL2.MA0777.1
5.46657e-39	-1.02986	0.34	0.583	1.04958e-35	PGC	ETV5-HUMAN.H10MO.D
5.68132e-39	-1.00666	0.331	0.565	1.09081e-35	PGC	FOXA2.SwissRegulon
1.27474e-38	-1.21179	0.349	0.556	2.44749e-35	PGC	ETS2-HUMAN.H10MO.C
1.57491e-38	-1.25432	0.359	0.547	3.02382e-35	PGC	IRF5.SwissRegulon
2.12722e-38	-1.20405	0.352	0.569	4.08427e-35	PGC	RUNX2.SwissRegulon
2.47694e-38	-0.973963	0.356	0.582	4.75572e-35	PGC	HOXB9.SwissRegulon
2.66605e-38	1.16254	0.597	0.392	5.11882e-35	PGC	OCT:OCT.HOMER
3.54256e-38	-1.34262	0.337	0.578	6.80172e-35	PGC	PHOX2A.MA0713.1
4.39794e-38	-1.09864	0.331	0.589	8.44405e-35	PGC	HSFY1-HUMAN.H10MO.D
6.30026e-38	-1.11477	0.33	0.569	1.20965e-34	PGC	NFAC2-HUMAN.H10MO.B
7.70866e-38	1.49257	0.602	0.364	1.48006e-34	PGC	SNAI2.MA0745.1
8.46829e-38	-0.966159	0.348	0.583	1.62591e-34	PGC	XBP1.MA0844.1
8.81975e-38	-4.21251	0.307	0.558	1.69339e-34	PGC	NFIA-HUMAN.H10MO.S
8.81975e-38	-4.21251	0.307	0.558	1.69339e-34	PGC	NFIB.SwissRegulon
8.81975e-38	-4.21251	0.307	0.558	1.69339e-34	PGC	NFIX.SwissRegulon
1.11668e-37	0.883223	0.644	0.395	2.14403e-34	PGC	PPARA::RXRA.MA1148.1
1.27562e-37	-0.97279	0.332	0.564	2.44919e-34	PGC	NF1.HOMER
1.78792e-37	-1.05365	0.334	0.582	3.43282e-34	PGC	NFIL3.SwissRegulon
2.06148e-37	-1.13234	0.353	0.581	3.95804e-34	PGC	ZSC16-HUMAN.H10MO.D
2.13624e-37	-1.13862	0.381	0.575	4.10157e-34	PGC	XBP1-HUMAN.H10MO.C
2.6858e-37	0.886699	0.625	0.396	5.15674e-34	PGC	KLF3.HOMER
3.04742e-37	-1.47423	0.317	0.548	5.85104e-34	PGC	ETV2-HUMAN.H10MO.D
3.09875e-37	0.932413	0.626	0.407	5.94961e-34	PGC	PPARE.HOMER
4.57563e-37	0.686786	0.616	0.38	8.78521e-34	PGC	JUND.MA0491.1
6.01709e-37	-1.33372	0.362	0.562	1.15528e-33	PGC	TBR1.SwissRegulon
6.15879e-37	-0.657782	0.353	0.601	1.18249e-33	PGC	PAX4-HUMAN.H10MO.D
7.04533e-37	0.896432	0.631	0.397	1.3527e-33	PGC	JUNB-HUMAN.H10MO.C
9.37144e-37	-1.44677	0.356	0.562	1.79932e-33	PGC	NRL.MA0842.1
1.48585e-36	-0.791118	0.356	0.576	2.85283e-33	PGC	HOXD11.MA0908.1
1.50203e-36	-3.7253	0.336	0.524	2.88389e-33	PGC	NKX3-1.SwissRegulon
1.63989e-36	1.39239	0.589	0.384	3.14858e-33	PGC	NANOG-HUMAN.H10MO.A
1.92326e-36	-0.892843	0.373	0.599	3.69266e-33	PGC	HOXD12.SwissRegulon
2.04403e-36	-0.914599	0.369	0.586	3.92453e-33	PGC	NOBOX.SwissRegulon
2.52719e-36	-0.857557	0.388	0.596	4.85221e-33	PGC	TEF-HUMAN.H10MO.D
2.56515e-36	-0.477741	0.32	0.599	4.92509e-33	PGC	MSX2.MA0708.1
3.66545e-36	-1.25453	0.348	0.58	7.03767e-33	PGC	VSX1.SwissRegulon
4.13825e-36	0.499609	0.647	0.412	7.94544e-33	PGC	IKZF1-HUMAN.H10MO.C
4.13825e-36	0.499609	0.647	0.412	7.94544e-33	PGC	IKZF1.SwissRegulon
4.83108e-36	-0.975997	0.372	0.593	9.27567e-33	PGC	LHX9.SwissRegulon
5.34846e-36	0.90524	0.614	0.376	1.0269e-32	PGC	NANOG.SwissRegulon
5.63568e-36	-1.28568	0.339	0.548	1.08205e-32	PGC	ELK3-HUMAN.H10MO.D
6.12266e-36	0.842731	0.617	0.38	1.17555e-32	PGC	HIC1-HUMAN.H10MO.C
6.39562e-36	-1.59074	0.341	0.576	1.22796e-32	PGC	EOMES.SwissRegulon
7.84955e-36	-1.1781	0.384	0.58	1.50711e-32	PGC	NKX3-2.MA0122.2
1.04727e-35	-8.28152	0.304	0.471	2.01076e-32	PGC	SRF.MA0083.3
1.77893e-35	-0.84576	0.345	0.583	3.41555e-32	PGC	ALX4.SwissRegulon
3.73339e-35	-1.48852	0.334	0.547	7.16811e-32	PGC	FOXM1.SwissRegulon
4.09958e-35	-0.93062	0.353	0.598	7.8712e-32	PGC	HOXC6.SwissRegulon
6.5718e-35	-0.728093	0.35	0.583	1.26179e-31	PGC	ALX3-HUMAN.H10MO.D
6.68039e-35	0.966982	0.643	0.394	1.28263e-31	PGC	IRX2-HUMAN.H10MO.D
6.83605e-35	0.752846	0.611	0.379	1.31252e-31	PGC	TP63.SwissRegulon
7.06109e-35	0.960471	0.609	0.396	1.35573e-31	PGC	TBX1.SwissRegulon
7.68308e-35	-1.23091	0.358	0.56	1.47515e-31	PGC	E2F2.MA0864.1
8.07894e-35	0.760801	0.613	0.385	1.55116e-31	PGC	HIVEP1.SwissRegulon
8.64503e-35	-0.949872	0.35	0.575	1.65985e-31	PGC	ZBED1.SwissRegulon
1.02126e-34	-0.934671	0.362	0.592	1.96083e-31	PGC	ESR2-HUMAN.H10MO.S
1.02126e-34	-0.934671	0.362	0.592	1.96083e-31	PGC	ESR2.SwissRegulon
1.15218e-34	-1.1701	0.345	0.554	2.21218e-31	PGC	IRF2.SwissRegulon
1.17032e-34	0.600915	0.593	0.361	2.24702e-31	PGC	GATA3.SwissRegulon
1.69429e-34	-1.16277	0.329	0.566	3.25303e-31	PGC	STAT6.SwissRegulon
2.20039e-34	-1.09475	0.337	0.568	4.22475e-31	PGC	STAT6.HOMER
3.09363e-34	0.514788	0.61	0.382	5.93978e-31	PGC	FOSL2.MA0478.1
3.21139e-34	0.852619	0.621	0.412	6.16586e-31	PGC	NR1D1.SwissRegulon
3.53912e-34	-0.92023	0.362	0.597	6.79511e-31	PGC	JUND.SwissRegulon
4.48005e-34	-0.895043	0.363	0.588	8.6017e-31	PGC	LHX3.SwissRegulon
5.53354e-34	0.749415	0.583	0.345	1.06244e-30	PGC	STAT1.MA0137.3
6.21356e-34	-3.39132	0.319	0.499	1.193e-30	PGC	EOMES-HUMAN.H10MO.D
6.47965e-34	0.696969	0.635	0.399	1.24409e-30	PGC	NR2F6.SwissRegulon
1.00631e-33	0.859841	0.596	0.37	1.93212e-30	PGC	RARG-HUMAN.H10MO.C
1.09496e-33	2.30555	0.349	0.626	2.10233e-30	PGC	DLX3-HUMAN.H10MO.C
1.33231e-33	1.46151	0.609	0.359	2.55803e-30	PGC	PO6F2-HUMAN.H10MO.D
1.42915e-33	-0.956729	0.374	0.598	2.74397e-30	PGC	MEIS2-HUMAN.H10MO.B
1.51126e-33	-4.3679	0.32	0.557	2.90162e-30	PGC	NFIC.MA0161.2
1.65287e-33	0.438575	0.601	0.387	3.1735e-30	PGC	KLF1-HUMAN.H10MO.C
2.1227e-33	-1.01457	0.353	0.578	4.07559e-30	PGC	TBP-HUMAN.H10MO.C
2.61955e-33	-10.8427	0.315	0.477	5.02954e-30	PGC	GATA6.MA1104.1
3.4495e-33	-1.22584	0.347	0.554	6.62304e-30	PGC	IRF5-HUMAN.H10MO.D
3.87511e-33	0.732434	0.62	0.391	7.44022e-30	PGC	PPARG.MA0066.1
8.44214e-33	-1.09668	0.336	0.581	1.62089e-29	PGC	RORC.MA1151.1
9.10116e-33	-5.22427	0.326	0.494	1.74742e-29	PGC	POU3F2.SwissRegulon
9.85589e-33	0.765886	0.329	0.593	1.89233e-29	PGC	EN1.MA0027.2
1.77379e-32	3.53438	0.321	0.59	3.40568e-29	PGC	ESX1.MA0644.1
1.77924e-32	-0.581025	0.352	0.581	3.41613e-29	PGC	HOXD13.SwissRegulon
1.85959e-32	-1.03676	0.366	0.577	3.57041e-29	PGC	ZBTB4-HUMAN.H10MO.S
3.15864e-32	0.985677	0.607	0.397	6.06459e-29	PGC	GATA6-HUMAN.H10MO.B
3.43255e-32	0.922406	0.598	0.397	6.5905e-29	PGC	ZN784-HUMAN.H10MO.D
5.44411e-32	-0.949609	0.356	0.579	1.04527e-28	PGC	PKNX1-HUMAN.H10MO.D
5.83093e-32	0.663023	0.62	0.378	1.11954e-28	PGC	JUN-HUMAN.H10MO.A
7.39014e-32	0.899344	0.606	0.381	1.41891e-28	PGC	FOSL1.MA0477.1
8.12483e-32	-1.0347	0.379	0.591	1.55997e-28	PGC	PROX1.SwissRegulon
9.63691e-32	-0.974009	0.352	0.567	1.85029e-28	PGC	FOXF1-HUMAN.H10MO.D
1.38758e-31	-0.998701	0.379	0.591	2.66415e-28	PGC	EVX2.SwissRegulon
1.44808e-31	0.939707	0.606	0.38	2.78032e-28	PGC	NF-E2.HOMER
1.47016e-31	-1.08728	0.357	0.57	2.8227e-28	PGC	NFAC1-HUMAN.H10MO.S
1.63832e-31	-1.07412	0.36	0.571	3.14557e-28	PGC	ZBTB4.SwissRegulon
1.65036e-31	-0.845643	0.366	0.571	3.16869e-28	PGC	SOX8.SwissRegulon
1.92561e-31	-0.774527	0.354	0.555	3.69717e-28	PGC	WT1.SwissRegulon
2.17382e-31	1.07645	0.593	0.388	4.17374e-28	PGC	ISL1-HUMAN.H10MO.D
2.17382e-31	1.07645	0.593	0.388	4.17374e-28	PGC	ISL1.SwissRegulon
2.18447e-31	-1.49072	0.353	0.58	4.19418e-28	PGC	VSX2-HUMAN.H10MO.D
2.76592e-31	4.33501	0.592	0.372	5.31057e-28	PGC	EVX2.MA0888.1
5.20603e-31	-0.601427	0.37	0.58	9.99559e-28	PGC	BARX1.SwissRegulon
6.78984e-31	-0.82098	0.353	0.548	1.30365e-27	PGC	MAFK.MAFK.SwissRegulon
7.5528e-31	-0.68798	0.35	0.579	1.45014e-27	PGC	ALX1.SwissRegulon
1.14874e-30	0.780166	0.61	0.401	2.20559e-27	PGC	NR1H2-HUMAN.H10MO.D
2.91523e-30	-1.06304	0.364	0.565	5.59724e-27	PGC	FOXF2.SwissRegulon
3.04274e-30	-0.491041	0.391	0.596	5.84205e-27	PGC	NR2E1-HUMAN.H10MO.D
3.33785e-30	0.668887	0.601	0.387	6.40868e-27	PGC	JUN(var.2).MA0489.1
4.54411e-30	-0.751807	0.365	0.592	8.72469e-27	PGC	FOXQ1.SwissRegulon
4.83952e-30	-0.624731	0.373	0.594	9.29188e-27	PGC	LHX2-HUMAN.H10MO.D
5.80771e-30	1.13215	0.58	0.373	1.11508e-26	PGC	P5F1B-HUMAN.H10MO.D
8.28296e-30	0.00210402	0.588	0.358	1.59033e-26	PGC	ERR2-HUMAN.H10MO.A
1.46552e-29	-0.962937	0.385	0.605	2.8138e-26	PGC	EMX2.SwissRegulon
1.58286e-29	0.898321	0.592	0.394	3.03908e-26	PGC	REL-HUMAN.H10MO.C
1.88392e-29	1.74235	0.578	0.362	3.61713e-26	PGC	FOXA1.MA0148.3
1.97011e-29	-0.482088	0.576	0.367	3.7826e-26	PGC	NEUROD1.SwissRegulon
2.37913e-29	0.820447	0.588	0.369	4.56794e-26	PGC	SPIB.MA0081.1
2.61173e-29	0.765402	0.591	0.391	5.01453e-26	PGC	TFCP2-HUMAN.H10MO.D
2.71672e-29	-1.73697	0.367	0.573	5.2161e-26	PGC	HXB8-HUMAN.H10MO.C
2.71672e-29	-1.73697	0.367	0.573	5.2161e-26	PGC	HOXB8.SwissRegulon
3.22175e-29	0.804196	0.593	0.395	6.18577e-26	PGC	SP2.SwissRegulon
3.67171e-29	-0.826208	0.387	0.561	7.04969e-26	PGC	TCF7-HUMAN.H10MO.C
6.47465e-29	-0.959378	0.371	0.579	1.24313e-25	PGC	FIGLA-HUMAN.H10MO.D
7.08314e-29	-0.159127	0.345	0.569	1.35996e-25	PGC	PROP1.SwissRegulon
7.65718e-29	0.0598744	0.563	0.309	1.47018e-25	PGC	RAD21.SwissRegulon
7.76961e-29	-0.516236	0.366	0.591	1.49176e-25	PGC	MIXL1-HUMAN.H10MO.D
8.35251e-29	-0.831239	0.366	0.578	1.60368e-25	PGC	TP73.MA0861.1
8.69859e-29	-3.94251	0.358	0.511	1.67013e-25	PGC	KLF12-HUMAN.H10MO.D
9.12613e-29	1.34489	0.597	0.388	1.75222e-25	PGC	ESRRB.SwissRegulon
1.27712e-28	-0.783761	0.394	0.567	2.45207e-25	PGC	HXD13-HUMAN.H10MO.D
1.42364e-28	-1.14919	0.356	0.544	2.73339e-25	PGC	TEAD1-HUMAN.H10MO.D
1.66305e-28	1.48342	0.589	0.38	3.19306e-25	PGC	POU4F2.MA0683.1
1.7877e-28	-1.75532	0.344	0.561	3.43238e-25	PGC	ARI3A-HUMAN.H10MO.S
1.92288e-28	0.748761	0.607	0.401	3.69193e-25	PGC	PRDM14.HOMER
1.98616e-28	-0.949433	0.401	0.597	3.81342e-25	PGC	HOXB3.SwissRegulon
2.04964e-28	-0.93394	0.369	0.601	3.93532e-25	PGC	TF2LX-HUMAN.H10MO.D
3.16304e-28	0.852553	0.617	0.41	6.07304e-25	PGC	BACH2.MA1101.1
3.64769e-28	-1.01833	0.386	0.578	7.00356e-25	PGC	DUXA-HUMAN.H10MO.D
3.66736e-28	0.999732	0.587	0.387	7.04133e-25	PGC	STAT1-HUMAN.H10MO.A
3.78644e-28	-0.725508	0.379	0.609	7.26996e-25	PGC	HOXD1.SwissRegulon
3.8635e-28	0.756616	0.594	0.408	7.41791e-25	PGC	TEAD4-HUMAN.H10MO.A
3.91134e-28	1.64127	0.598	0.39	7.50978e-25	PGC	TEAD1.MA0090.2
4.9569e-28	-1.37091	0.372	0.572	9.51724e-25	PGC	EGR1-HUMAN.H10MO.A
5.16276e-28	-1.57327	0.32	0.528	9.91251e-25	PGC	JUNB.SwissRegulon
5.73896e-28	0.610363	0.601	0.397	1.10188e-24	PGC	AP-1.HOMER
6.07072e-28	0.783018	0.598	0.4	1.16558e-24	PGC	ZNF322.HOMER
6.54705e-28	-0.249783	0.349	0.579	1.25703e-24	PGC	PHX2B-HUMAN.H10MO.D
7.63877e-28	0.907337	0.61	0.411	1.46664e-24	PGC	KLF13.MA0657.1
7.90266e-28	-0.852003	0.39	0.564	1.51731e-24	PGC	BHLHE23.SwissRegulon
8.64979e-28	-0.94002	0.384	0.588	1.66076e-24	PGC	HLF.MA0043.2
8.87856e-28	-1.22007	0.369	0.555	1.70468e-24	PGC	EBNA1.HOMER
1.02752e-27	-0.943853	0.373	0.577	1.97284e-24	PGC	OSR1.SwissRegulon
1.10908e-27	-0.705333	0.374	0.561	2.12943e-24	PGC	HMX3.SwissRegulon
1.31109e-27	-0.903604	0.367	0.567	2.5173e-24	PGC	POU6F1.SwissRegulon
1.33174e-27	0.718743	0.586	0.369	2.55694e-24	PGC	BCL6.SwissRegulon
2.66974e-27	0.772552	0.616	0.39	5.1259e-24	PGC	TR4.HOMER
2.71007e-27	-2.41033	0.37	0.579	5.20334e-24	PGC	SOX5-HUMAN.H10MO.C
2.8629e-27	0.933371	0.587	0.403	5.49677e-24	PGC	THA-HUMAN.H10MO.S
3.1609e-27	-1.1515	0.381	0.575	6.06893e-24	PGC	CUX2.MA0755.1
3.25707e-27	-1.17495	0.346	0.536	6.25357e-24	PGC	FLI1.SwissRegulon
4.17898e-27	-2.46828	0.377	0.578	8.02363e-24	PGC	LHX4.SwissRegulon
6.33916e-27	-0.779189	0.373	0.569	1.21712e-23	PGC	SOX11.SwissRegulon
7.53669e-27	0.852398	0.613	0.436	1.44705e-23	PGC	HNF4G-HUMAN.H10MO.C
2.02584e-26	-1.68653	0.393	0.574	3.8896e-23	PGC	RARB-HUMAN.H10MO.D
2.70712e-26	-0.845467	0.401	0.564	5.19768e-23	PGC	MEF2A-HUMAN.H10MO.A
3.20685e-26	-1.00801	0.329	0.538	6.15714e-23	PGC	CREB5-HUMAN.H10MO.D
3.3532e-26	-1.15579	0.362	0.541	6.43814e-23	PGC	ZN589-HUMAN.H10MO.D
3.92615e-26	-1.03408	0.378	0.578	7.53821e-23	PGC	DBP-HUMAN.H10MO.B
4.03615e-26	1.59658	0.564	0.391	7.74942e-23	PGC	FOXF2.MA0030.1
4.89166e-26	-0.00432001	0.311	0.565	9.39199e-23	PGC	SHOX.MA0630.1
4.89166e-26	-0.00432001	0.311	0.565	9.39199e-23	PGC	ISX.MA0654.1
5.67839e-26	-0.692778	0.403	0.578	1.09025e-22	PGC	SOX21.SwissRegulon
9.23716e-26	-0.677826	0.381	0.572	1.77353e-22	PGC	RUNX-AML.HOMER
9.39169e-26	-2.74761	0.381	0.553	1.80321e-22	PGC	RARA-HUMAN.H10MO.S
9.39169e-26	-2.74761	0.381	0.553	1.80321e-22	PGC	RARG-HUMAN.H10MO.S
9.39169e-26	-2.74761	0.381	0.553	1.80321e-22	PGC	RARG.SwissRegulon
1.14298e-25	0.675643	0.618	0.428	2.19453e-22	PGC	VDR-HUMAN.H10MO.B
1.17109e-25	1.01851	0.602	0.405	2.24849e-22	PGC	ZN219-HUMAN.H10MO.D
1.23551e-25	1.0613	0.595	0.392	2.37218e-22	PGC	POU2F2.SwissRegulon
1.52367e-25	-1.40815	0.344	0.55	2.92545e-22	PGC	RFX3.SwissRegulon
1.59604e-25	-0.681589	0.398	0.572	3.06439e-22	PGC	PAX7-HUMAN.H10MO.D
2.69727e-25	0.0639387	0.601	0.395	5.17876e-22	PGC	FOS::JUNB.MA1134.1
3.01282e-25	-1.8443	0.352	0.52	5.78461e-22	PGC	MAFA.MAFA-HUMAN.H10MO.D
3.02338e-25	-0.858243	0.386	0.554	5.80488e-22	PGC	PROX1.MA0794.1
3.16847e-25	-1.78942	0.57	0.336	6.08345e-22	PGC	ESRRB.MA0141.3
6.25334e-25	-0.829461	0.353	0.553	1.20064e-21	PGC	ELF3.SwissRegulon
6.72738e-25	-0.749023	0.378	0.578	1.29166e-21	PGC	DUXA.SwissRegulon
7.34336e-25	-0.865395	0.352	0.578	1.40992e-21	PGC	TGIF2.SwissRegulon
9.14239e-25	1.16337	0.589	0.41	1.75534e-21	PGC	GATA1::TAL1.MA0140.2
1.02148e-24	1.18198	0.326	0.565	1.96124e-21	PGC	RAX.MA0718.1
1.12656e-24	-1.31133	0.379	0.57	2.163e-21	PGC	NR1H4.SwissRegulon
1.15045e-24	0.539825	0.6	0.403	2.20887e-21	PGC	SRBP1-HUMAN.H10MO.B
1.34523e-24	0.26663	0.583	0.402	2.58283e-21	PGC	EZH2.SwissRegulon
1.45646e-24	-0.67534	0.386	0.574	2.7964e-21	PGC	HNF1A.MA0046.2
1.59309e-24	-0.951701	0.345	0.543	3.05873e-21	PGC	JUNB(var.2).MA1140.1
1.78297e-24	-0.660018	0.393	0.571	3.42331e-21	PGC	DLX6-HUMAN.H10MO.D
2.28006e-24	-0.69291	0.398	0.579	4.37771e-21	PGC	HOXB13.SwissRegulon
4.60919e-24	0.295362	0.593	0.4	8.84965e-21	PGC	JDP2.SwissRegulon
5.67091e-24	-0.792065	0.393	0.56	1.08881e-20	PGC	NEUROD2.MA0668.1
5.68498e-24	-0.951109	0.378	0.562	1.09152e-20	PGC	PKNOX1.SwissRegulon
5.76916e-24	0.651714	0.625	0.428	1.10768e-20	PGC	EGR2.SwissRegulon
6.8799e-24	-1.44312	0.409	0.564	1.32094e-20	PGC	SOX30.SwissRegulon
7.04912e-24	-0.843793	0.394	0.572	1.35343e-20	PGC	RORA.SwissRegulon
7.29022e-24	-0.904595	0.386	0.572	1.39972e-20	PGC	PU.1-IRF.HOMER
1.14108e-23	0.352301	0.614	0.419	2.19088e-20	PGC	FOS.MA0476.1
1.66003e-23	-0.976853	0.344	0.538	3.18726e-20	PGC	FOSL1::JUN(var.2).MA1129.1
1.67537e-23	-0.733736	0.411	0.568	3.21671e-20	PGC	EMX1.SwissRegulon
1.69048e-23	-0.26395	0.367	0.573	3.24571e-20	PGC	ARX.SwissRegulon
2.13604e-23	-0.875893	0.391	0.574	4.10119e-20	PGC	CEBPB-HUMAN.H10MO.A
2.29239e-23	-0.868759	0.37	0.543	4.40139e-20	PGC	RUNX2.MA0511.2
3.82117e-23	-0.909495	0.387	0.558	7.33664e-20	PGC	EP300.SwissRegulon
4.01592e-23	-0.88315	0.376	0.56	7.71056e-20	PGC	NR3C2.MA0727.1
4.36137e-23	-1.39212	0.383	0.543	8.37383e-20	PGC	TFE2-HUMAN.H10MO.C
4.671e-23	-1.93822	0.379	0.518	8.96833e-20	PGC	MAFA.MAFA.SwissRegulon
7.77112e-23	-0.787824	0.386	0.579	1.49205e-19	PGC	FOXO6.SwissRegulon
8.55074e-23	-0.675581	0.379	0.561	1.64174e-19	PGC	TCF7.SwissRegulon
1.04643e-22	-1.04627	0.383	0.55	2.00915e-19	PGC	TBX2.SwissRegulon
1.10192e-22	0.698372	0.581	0.412	2.11569e-19	PGC	ERG.HOMER
1.14067e-22	-0.921823	0.381	0.556	2.19009e-19	PGC	TLX1-HUMAN.H10MO.S
1.15247e-22	0.209555	0.595	0.398	2.21275e-19	PGC	MAZ.MAZ.SwissRegulon
1.58595e-22	-0.934673	0.328	0.551	3.04502e-19	PGC	PRRX1.MA0716.1
1.58595e-22	-0.934673	0.328	0.551	3.04502e-19	PGC	UNCX.SwissRegulon
1.69697e-22	-0.935879	0.372	0.558	3.25818e-19	PGC	LBX2-HUMAN.H10MO.D
1.87418e-22	-1.04522	0.38	0.547	3.59842e-19	PGC	NR3C1.MA0113.3
1.91874e-22	0.109669	0.583	0.403	3.68398e-19	PGC	FOS::JUND.MA1141.1
2.28333e-22	0.684481	0.567	0.393	4.38399e-19	PGC	PU.1.HOMER
2.34145e-22	0.624731	0.572	0.405	4.49559e-19	PGC	ESR2-HUMAN.H10MO.A
2.62904e-22	-0.887941	0.39	0.581	5.04776e-19	PGC	HAND1-HUMAN.H10MO.D
3.02196e-22	0.84915	0.593	0.415	5.80216e-19	PGC	SOX13-HUMAN.H10MO.D
4.42929e-22	-0.751856	0.415	0.584	8.50424e-19	PGC	ELF5-HUMAN.H10MO.D
4.4462e-22	0.52706	0.577	0.403	8.53671e-19	PGC	UBIP1-HUMAN.H10MO.D
6.42568e-22	-0.760093	0.376	0.53	1.23373e-18	PGC	ETS2.SwissRegulon
6.87071e-22	0.697417	0.604	0.435	1.31918e-18	PGC	RXRA.SwissRegulon
8.01784e-22	0.21821	0.344	0.558	1.53942e-18	PGC	PRRX2-HUMAN.H10MO.C
1.16609e-21	-0.540966	0.382	0.555	2.23889e-18	PGC	ALX1-HUMAN.H10MO.B
1.17418e-21	0.886786	0.345	0.564	2.25443e-18	PGC	NOBOX-HUMAN.H10MO.C
1.1987e-21	0.576606	0.336	0.544	2.30151e-18	PGC	MIXL1.MA0662.1
1.49616e-21	0.398524	0.57	0.412	2.87263e-18	PGC	MYOD1-HUMAN.H10MO.C
1.49616e-21	0.398524	0.57	0.412	2.87263e-18	PGC	MYOD1.SwissRegulon
2.44422e-21	-0.668939	0.377	0.547	4.6929e-18	PGC	ALX4-HUMAN.H10MO.D
2.51948e-21	-0.698417	0.39	0.559	4.83741e-18	PGC	HMBOX1.MA0895.1
2.55271e-21	0.558416	0.586	0.422	4.9012e-18	PGC	FOSB-HUMAN.H10MO.C
3.27113e-21	-0.742687	0.394	0.551	6.28056e-18	PGC	ZNF416.HOMER
3.28685e-21	-0.682613	0.383	0.566	6.31074e-18	PGC	OTX1.MA0711.1
4.37157e-21	-1.5418	0.403	0.512	8.39341e-18	PGC	SOX4-HUMAN.H10MO.C
4.72048e-21	-0.493634	0.373	0.567	9.06331e-18	PGC	GMEB2.MA0862.1
4.80014e-21	-1.17676	0.375	0.553	9.21626e-18	PGC	ZBTB4-HUMAN.H10MO.D
5.32886e-21	-0.783766	0.4	0.555	1.02314e-17	PGC	OLIG2.MA0678.1
5.64771e-21	-0.65567	0.379	0.552	1.08436e-17	PGC	OLIG2-HUMAN.H10MO.D
5.91245e-21	-1.0696	0.575	0.326	1.13519e-17	PGC	CTCF.HOMER
6.7558e-21	-1.60375	0.359	0.542	1.29711e-17	PGC	ATF7.SwissRegulon
7.51137e-21	-0.905671	0.389	0.544	1.44218e-17	PGC	POU4F3.SwissRegulon
1.78668e-20	-0.770841	0.376	0.57	3.43043e-17	PGC	DLX2-HUMAN.H10MO.D
2.12656e-20	-0.909175	0.391	0.55	4.08299e-17	PGC	SIX6.SwissRegulon
2.31526e-20	-1.03411	0.369	0.539	4.4453e-17	PGC	FEV-HUMAN.H10MO.C
2.36556e-20	-2.18485	0.365	0.501	4.54187e-17	PGC	NFIC-HUMAN.H10MO.A
2.46269e-20	-0.776612	0.396	0.582	4.72837e-17	PGC	DLX5.SwissRegulon
2.47826e-20	-0.490331	0.41	0.562	4.75827e-17	PGC	HOXA3.SwissRegulon
2.58138e-20	-1.79497	0.61	0.356	4.95624e-17	PGC	SNAI2-HUMAN.H10MO.C
3.63074e-20	-0.959269	0.403	0.556	6.97102e-17	PGC	EGR2-HUMAN.H10MO.C
3.74168e-20	-0.872209	0.375	0.541	7.18402e-17	PGC	POU2F1.SwissRegulon
4.22952e-20	0.579628	0.589	0.422	8.12067e-17	PGC	ESR2.MA0258.2
4.55199e-20	-0.630854	0.38	0.565	8.73981e-17	PGC	TBX19.SwissRegulon
7.38291e-20	-0.699759	0.388	0.554	1.41752e-16	PGC	SOX1.SwissRegulon
7.6539e-20	-0.627237	0.389	0.56	1.46955e-16	PGC	NKX22-HUMAN.H10MO.D
1.00319e-19	-0.883015	0.404	0.547	1.92612e-16	PGC	ATF4.MA0833.1
1.23999e-19	-0.662175	0.37	0.533	2.38078e-16	PGC	PO3F2-HUMAN.H10MO.D
1.83699e-19	1.90568	0.373	0.594	3.52702e-16	PGC	DLX3.SwissRegulon
2.12228e-19	-1.15834	0.343	0.517	4.07478e-16	PGC	FOSB::JUN.MA1127.1
2.1959e-19	-0.809122	0.396	0.573	4.21612e-16	PGC	ZNF274.SwissRegulon
3.15293e-19	-0.998699	0.372	0.54	6.05363e-16	PGC	LMX1B.SwissRegulon
4.33618e-19	1.02405	0.363	0.559	8.32547e-16	PGC	PO4F2-HUMAN.H10MO.D
6.99385e-19	0.213267	0.372	0.526	1.34282e-15	PGC	RFX4-HUMAN.H10MO.D
7.78636e-19	-0.824739	0.409	0.573	1.49498e-15	PGC	ZNF24.MA1124.1
1.17962e-18	0.288351	0.332	0.535	2.26488e-15	PGC	LBX1.MA0618.1
1.31274e-18	-2.27063	0.565	0.399	2.52046e-15	PGC	ZNF263.SwissRegulon
1.32941e-18	-0.618957	0.395	0.566	2.55247e-15	PGC	RXRA::VDR.MA0074.1
1.41851e-18	-1.18049	0.414	0.569	2.72353e-15	PGC	CEBPB.SwissRegulon
1.448e-18	0.568222	0.549	0.383	2.78016e-15	PGC	ZBTB18.HOMER
1.49737e-18	1.89255	0.343	0.542	2.87495e-15	PGC	VSX2.SwissRegulon
1.61372e-18	0.471185	0.563	0.403	3.09834e-15	PGC	DBP.SwissRegulon
1.69656e-18	-0.473948	0.389	0.569	3.2574e-15	PGC	GBX1.SwissRegulon
1.95174e-18	0.731468	0.557	0.427	3.74735e-15	PGC	OLIG1-HUMAN.H10MO.D
2.32857e-18	-0.912965	0.391	0.54	4.47086e-15	PGC	Pax6.MA0069.1
3.13526e-18	0.619528	0.586	0.423	6.0197e-15	PGC	P63-HUMAN.H10MO.A
3.17991e-18	0.45562	0.585	0.425	6.10543e-15	PGC	FOSL1-HUMAN.H10MO.A
4.64762e-18	0.577832	0.56	0.401	8.92344e-15	PGC	NR4A2-HUMAN.H10MO.C
4.76261e-18	-4.94732	0.388	0.52	9.14421e-15	PGC	SP4.MA0685.1
5.50761e-18	-0.692832	0.361	0.548	1.05746e-14	PGC	ELF4.SwissRegulon
5.9221e-18	0.509585	0.361	0.566	1.13704e-14	PGC	DLX6.MA0882.1
7.72079e-18	-0.966168	0.374	0.53	1.48239e-14	PGC	ATF2.SwissRegulon
8.28192e-18	-2.4765	0.373	0.506	1.59013e-14	PGC	FOXM1.HOMER
8.61293e-18	-0.700543	0.41	0.554	1.65368e-14	PGC	CDC5L-HUMAN.H10MO.D
9.33501e-18	-1.77113	0.375	0.48	1.79232e-14	PGC	ERR1-HUMAN.H10MO.D
9.49195e-18	-0.579684	0.387	0.552	1.82246e-14	PGC	WT1-HUMAN.H10MO.D
1.17411e-17	-0.69082	0.382	0.558	2.2543e-14	PGC	NKX2-2.SwissRegulon
1.2179e-17	-0.803495	0.389	0.54	2.33836e-14	PGC	CDX1-HUMAN.H10MO.C
1.2179e-17	-0.803495	0.389	0.54	2.33836e-14	PGC	CDX1.SwissRegulon
1.40211e-17	-0.704954	0.425	0.556	2.69204e-14	PGC	NR4A1.SwissRegulon
1.5425e-17	0.698117	0.55	0.421	2.96161e-14	PGC	TFCP2.MA0145.3
1.99904e-17	1.17544	0.559	0.408	3.83817e-14	PGC	PO2F2-HUMAN.H10MO.D
2.87916e-17	0.231133	0.557	0.413	5.52798e-14	PGC	FOSL2::JUNB.MA1138.1
3.00507e-17	-0.140963	0.572	0.411	5.76973e-14	PGC	FOSL2::JUN.MA1130.1
3.44409e-17	-2.12993	0.35	0.531	6.61265e-14	PGC	UNCX.MA0721.1
4.09657e-17	-0.806632	0.415	0.554	7.86542e-14	PGC	TFAP4.SwissRegulon
4.42767e-17	0.647164	0.554	0.413	8.50112e-14	PGC	PRGR-HUMAN.H10MO.C
5.41475e-17	-0.525251	0.412	0.569	1.03963e-13	PGC	PAX8.SwissRegulon
5.90781e-17	-0.855699	0.39	0.539	1.1343e-13	PGC	KLF7.SwissRegulon
5.91484e-17	0.467579	0.571	0.434	1.13565e-13	PGC	ZN423-HUMAN.H10MO.D
6.50695e-17	0.569896	0.568	0.427	1.24933e-13	PGC	NEUROG2.MA0669.1
6.93526e-17	0.395535	0.602	0.446	1.33157e-13	PGC	COT2-HUMAN.H10MO.S
7.95882e-17	0.433545	0.584	0.434	1.52809e-13	PGC	PKNX2-HUMAN.H10MO.D
9.52627e-17	-0.997353	0.366	0.506	1.82904e-13	PGC	E2F6.MA0471.1
1.03759e-16	-4.0249	0.371	0.46	1.99217e-13	PGC	ZEB1-HUMAN.H10MO.B
1.17174e-16	-0.694773	0.404	0.551	2.24973e-13	PGC	MEF2D.SwissRegulon
1.3026e-16	-1.25458	0.355	0.528	2.50099e-13	PGC	LBX2.MA0699.1
1.80445e-16	-1.21852	0.425	0.572	3.46454e-13	PGC	CEBP:AP1.HOMER
1.85381e-16	0.618013	0.573	0.395	3.55931e-13	PGC	TEAD4.HOMER
2.14514e-16	0.462462	0.593	0.422	4.11867e-13	PGC	GSC2.SwissRegulon
2.74397e-16	-0.595488	0.404	0.537	5.26843e-13	PGC	HOXC12.SwissRegulon
2.80524e-16	-0.580959	0.335	0.525	5.38605e-13	PGC	LHX9.MA0701.1
2.80524e-16	-0.580959	0.335	0.525	5.38605e-13	PGC	RAX2.MA0717.1
2.80524e-16	-0.580959	0.335	0.525	5.38605e-13	PGC	RAX2.SwissRegulon
2.80524e-16	-0.580959	0.335	0.525	5.38605e-13	PGC	SHOX.SwissRegulon
2.81883e-16	-0.697351	0.377	0.54	5.41215e-13	PGC	CREB5.SwissRegulon
3.08971e-16	0.858368	0.528	0.337	5.93224e-13	PGC	CTCF.MA0139.1
3.57094e-16	0.299656	0.579	0.404	6.85621e-13	PGC	BATF.HOMER
3.77329e-16	-0.876997	0.379	0.524	7.24471e-13	PGC	IKZF2.SwissRegulon
4.27178e-16	-0.455757	0.588	0.397	8.20182e-13	PGC	ZEB1.SwissRegulon
5.43697e-16	-0.606741	0.387	0.552	1.0439e-12	PGC	FOXF1.SwissRegulon
5.71776e-16	0.597456	0.56	0.415	1.09781e-12	PGC	PRRX1-HUMAN.H10MO.D
6.30605e-16	-0.567377	0.406	0.546	1.21076e-12	PGC	HSFY2.SwissRegulon
7.69934e-16	0.714342	0.569	0.42	1.47827e-12	PGC	BCL11A.SwissRegulon
9.17328e-16	-0.577885	0.406	0.572	1.76127e-12	PGC	PBX2-HUMAN.H10MO.C
9.17328e-16	-0.577885	0.406	0.572	1.76127e-12	PGC	PBX2.SwissRegulon
9.26606e-16	-1.07474	0.384	0.515	1.77908e-12	PGC	SMAD2.SwissRegulon
9.48241e-16	-2.66079	0.367	0.475	1.82062e-12	PGC	ZKSCAN3.SwissRegulon
2.38951e-15	-0.998389	0.379	0.547	4.58787e-12	PGC	FOXP1.SwissRegulon
2.41921e-15	0.803701	0.561	0.434	4.64489e-12	PGC	ZNF219.SwissRegulon
2.70508e-15	-0.704128	0.419	0.557	5.19376e-12	PGC	SIX2.SwissRegulon
3.37794e-15	-1.0655	0.392	0.514	6.48565e-12	PGC	NR0B1-HUMAN.H10MO.D
3.37794e-15	-1.0655	0.392	0.514	6.48565e-12	PGC	NR0B1.SwissRegulon
3.38934e-15	-4.31589	0.389	0.453	6.50753e-12	PGC	ZNF148.SwissRegulon
3.40562e-15	0.419247	0.575	0.422	6.53879e-12	PGC	COUP-TFII.HOMER
3.61671e-15	-1.14482	0.432	0.524	6.94409e-12	PGC	TLX1-HUMAN.H10MO.D
5.33952e-15	0.627294	0.568	0.418	1.02519e-11	PGC	TBX1.MA0805.1
5.4243e-15	2.89699	0.363	0.531	1.04146e-11	PGC	HESX1.MA0894.1
6.0796e-15	-0.6555	0.416	0.539	1.16728e-11	PGC	RUNX.HOMER
7.05167e-15	-0.576318	0.392	0.554	1.35392e-11	PGC	NOTO-HUMAN.H10MO.D
7.60913e-15	-0.731162	0.405	0.546	1.46095e-11	PGC	TGIF1.SwissRegulon
9.84037e-15	2.47796	0.376	0.557	1.88935e-11	PGC	GBX1.MA0889.1
1.03302e-14	-0.155016	0.56	0.402	1.98339e-11	PGC	FOSL1::JUNB.MA1137.1
1.11771e-14	-0.88355	0.423	0.526	2.14601e-11	PGC	ZN652-HUMAN.H10MO.D
1.54385e-14	-0.665234	0.412	0.537	2.96419e-11	PGC	BACH1.SwissRegulon
1.94463e-14	-0.564963	0.405	0.552	3.73369e-11	PGC	HXC8-HUMAN.H10MO.D
1.94463e-14	-0.564963	0.405	0.552	3.73369e-11	PGC	HOXC8.SwissRegulon
2.27973e-14	-0.905985	0.358	0.51	4.37708e-11	PGC	ATF2-HUMAN.H10MO.B
2.5111e-14	-0.594858	0.392	0.538	4.82131e-11	PGC	OLIG1.SwissRegulon
3.80415e-14	0.443964	0.62	0.463	7.30396e-11	PGC	KLF13-HUMAN.H10MO.D
4.39472e-14	-1.13513	0.398	0.511	8.43786e-11	PGC	ZEP2-HUMAN.H10MO.D
5.79569e-14	-0.875235	0.392	0.533	1.11277e-10	PGC	SCRT1.MA0743.1
5.81096e-14	0.510314	0.559	0.45	1.1157e-10	PGC	HXB1-HUMAN.H10MO.D
5.81096e-14	0.510314	0.559	0.45	1.1157e-10	PGC	HOXB1.SwissRegulon
6.12094e-14	0.554637	0.575	0.441	1.17522e-10	PGC	KLF15-HUMAN.H10MO.D
6.12094e-14	0.554637	0.575	0.441	1.17522e-10	PGC	KLF15.SwissRegulon
7.06939e-14	-0.469579	0.398	0.534	1.35732e-10	PGC	UNC4-HUMAN.H10MO.D
7.57464e-14	-6.63916	0.376	0.448	1.45433e-10	PGC	SNAI1.SwissRegulon
8.01516e-14	0.579546	0.564	0.42	1.53891e-10	PGC	GATA6-HUMAN.H10MO.S
8.60817e-14	4.5468	0.533	0.422	1.65277e-10	PGC	EMX1.MA0612.1
9.00929e-14	0.468065	0.547	0.404	1.72978e-10	PGC	STA5A-HUMAN.H10MO.B
1.04902e-13	-4.71697	0.412	0.49	2.01411e-10	PGC	KLF10.HOMER
1.09212e-13	-0.800483	0.415	0.547	2.09687e-10	PGC	ONECUT1.SwissRegulon
1.44094e-13	-1.17058	0.399	0.496	2.7666e-10	PGC	E2F1.HOMER
1.78458e-13	-0.564088	0.425	0.543	3.42639e-10	PGC	ELF3-HUMAN.H10MO.D
1.87015e-13	-0.845762	0.421	0.531	3.59068e-10	PGC	TBX1-HUMAN.H10MO.D
1.89012e-13	-1.37096	0.356	0.487	3.62902e-10	PGC	FOSL2::JUND(var.2).MA1145.1
2.21278e-13	0.330495	0.571	0.419	4.24854e-10	PGC	DPRX-HUMAN.H10MO.D
2.98768e-13	-0.0487476	0.556	0.425	5.73635e-10	PGC	FOSL1::JUN.MA1128.1
3.01013e-13	2.30062	0.356	0.515	5.77945e-10	PGC	GBX2.MA0890.1
3.11036e-13	0.445877	0.576	0.423	5.97189e-10	PGC	THAP1.MA0597.1
3.33457e-13	-4.45994	0.422	0.509	6.40237e-10	PGC	KLF14-HUMAN.H10MO.D
3.72511e-13	0.756053	0.545	0.42	7.1522e-10	PGC	SPI1.SwissRegulon
3.98853e-13	-0.838123	0.36	0.512	7.65797e-10	PGC	RFX4.MA0799.1
4.59663e-13	-0.539863	0.419	0.558	8.82553e-10	PGC	GRHL1-HUMAN.H10MO.D
4.75521e-13	0.299392	0.552	0.42	9.13001e-10	PGC	NR2F2.MA1111.1
5.07849e-13	6.46499	0.536	0.423	9.75071e-10	PGC	MEOX1.MA0661.1
5.2512e-13	-0.998848	0.404	0.515	1.00823e-09	PGC	SMAD3.MA0795.1
6.6518e-13	11.6469	0.537	0.411	1.27715e-09	PGC	HOXB2.MA0902.1
7.68137e-13	-0.89361	0.377	0.505	1.47482e-09	PGC	JUN::JUNB(var.2).MA1133.1
8.21259e-13	-1.35143	0.401	0.504	1.57682e-09	PGC	ZNF415.HOMER
8.74846e-13	0.120172	0.575	0.425	1.6797e-09	PGC	FOSL1.SwissRegulon
1.00302e-12	0.622804	0.539	0.436	1.92581e-09	PGC	VAX1.SwissRegulon
1.01052e-12	-0.576504	0.414	0.536	1.9402e-09	PGC	ONECUT2.SwissRegulon
1.19168e-12	0.114764	0.56	0.427	2.28802e-09	PGC	FOSL2::JUND.MA1144.1
1.34854e-12	-0.763189	0.413	0.536	2.5892e-09	PGC	SIX3.SwissRegulon
1.37602e-12	-0.650332	0.386	0.512	2.64196e-09	PGC	PRDM1-HUMAN.H10MO.C
1.67724e-12	0.282148	0.583	0.408	3.2203e-09	PGC	ZNF16.HOMER
1.84839e-12	0.00708493	0.546	0.423	3.54891e-09	PGC	FOSB::JUNB.MA1135.1
2.02623e-12	0.409419	0.591	0.447	3.89035e-09	PGC	PPARA-HUMAN.H10MO.C
2.65072e-12	0.483002	0.566	0.425	5.08939e-09	PGC	NR1H4.MA1110.1
2.6765e-12	0.484202	0.565	0.445	5.13888e-09	PGC	ATF5.SwissRegulon
2.72695e-12	-1.57006	0.367	0.516	5.23575e-09	PGC	BATF3.MA0835.1
3.37474e-12	0.729126	0.558	0.425	6.4795e-09	PGC	PATZ1.SwissRegulon
3.42102e-12	-0.450871	0.42	0.531	6.56835e-09	PGC	CDX2-HUMAN.H10MO.C
4.04463e-12	-0.613013	0.395	0.547	7.76569e-09	PGC	NR2C1-HUMAN.H10MO.C
4.04463e-12	-0.613013	0.395	0.547	7.76569e-09	PGC	NR2C1.SwissRegulon
4.09097e-12	-1.03009	0.359	0.51	7.85466e-09	PGC	FOSL2::JUN(var.2).MA1131.1
4.30501e-12	-0.166258	0.401	0.556	8.26561e-09	PGC	MYF6.MA0667.1
5.31287e-12	0.137819	0.577	0.417	1.02007e-08	PGC	E2A.HOMER
5.74973e-12	-1.02373	0.409	0.53	1.10395e-08	PGC	NKX28-HUMAN.H10MO.C
5.93015e-12	0.198605	0.568	0.438	1.13859e-08	PGC	GLI3.SwissRegulon
6.24956e-12	0.325983	0.584	0.436	1.19992e-08	PGC	BATF.SwissRegulon
6.31654e-12	0.618133	0.562	0.433	1.21278e-08	PGC	FXR.HOMER
6.43269e-12	0.0789032	0.538	0.429	1.23508e-08	PGC	NFE2.MA0841.1
6.59839e-12	-1.03127	0.381	0.517	1.26689e-08	PGC	ATF7.MA0834.1
6.74573e-12	-1.93958	0.546	0.37	1.29518e-08	PGC	STF1-HUMAN.H10MO.B
7.00964e-12	-0.555062	0.413	0.528	1.34585e-08	PGC	MYBL1.MA0776.1
7.15235e-12	-0.457462	0.43	0.566	1.37325e-08	PGC	SOX3-HUMAN.H10MO.D
7.3742e-12	-0.408787	0.414	0.531	1.41585e-08	PGC	HXC12-HUMAN.H10MO.D
7.47232e-12	-1.073	0.364	0.497	1.43468e-08	PGC	JDP2-HUMAN.H10MO.D
8.14047e-12	-3.81718	0.401	0.468	1.56297e-08	PGC	SOX2.SwissRegulon
8.8771e-12	0.555936	0.566	0.441	1.7044e-08	PGC	BCL3.SwissRegulon
9.02164e-12	-0.768712	0.425	0.536	1.73215e-08	PGC	HOXA7.SwissRegulon
9.04743e-12	-0.436963	0.422	0.547	1.73711e-08	PGC	BHLHE22.MA0818.1
9.49571e-12	0.336527	0.541	0.416	1.82318e-08	PGC	GATA3-HUMAN.H10MO.C
1.30704e-11	1.09596	0.547	0.395	2.50951e-08	PGC	NR5A2-HUMAN.H10MO.C
1.33044e-11	3.66744	0.539	0.424	2.55445e-08	PGC	EVX1.MA0887.1
1.63416e-11	0.692211	0.545	0.422	3.13759e-08	PGC	PPARA-HUMAN.H10MO.S
1.63416e-11	0.692211	0.545	0.422	3.13759e-08	PGC	PPARA.SwissRegulon
1.80934e-11	-0.888213	0.43	0.534	3.47393e-08	PGC	PEBB-HUMAN.H10MO.C
2.48732e-11	0.415109	0.554	0.442	4.77566e-08	PGC	TBX21.MA0690.1
3.02863e-11	-0.492665	0.431	0.533	5.81497e-08	PGC	RORB.MA1150.1
3.08263e-11	1.19067	0.549	0.419	5.91865e-08	PGC	FOXA1.HOMER
3.1188e-11	-0.370506	0.405	0.555	5.9881e-08	PGC	ALX3.SwissRegulon
3.12324e-11	-0.957106	0.423	0.532	5.99662e-08	PGC	SCRT2.MA0744.1
3.51207e-11	0.865419	0.541	0.428	6.74318e-08	PGC	POU4F3.MA0791.1
3.66603e-11	0.280458	0.537	0.4	7.03877e-08	PGC	POU6F2.MA0793.1
4.49365e-11	-0.729066	0.406	0.517	8.62781e-08	PGC	SPI1.MA0080.4
5.19311e-11	-0.523769	0.413	0.534	9.97077e-08	PGC	EVI1-HUMAN.H10MO.B
5.46657e-11	0.335079	0.57	0.433	1.04958e-07	PGC	BATF::JUN.MA0462.1
6.35266e-11	-3.98199	0.357	0.526	1.21971e-07	PGC	GSX2.MA0893.1
6.62762e-11	-0.601794	0.42	0.54	1.2725e-07	PGC	ESR1.MA0112.3
6.83652e-11	-1.01739	0.41	0.501	1.31261e-07	PGC	NR3C2.SwissRegulon
6.96412e-11	-0.839332	0.433	0.542	1.33711e-07	PGC	CUX1.MA0754.1
8.0164e-11	-0.496418	0.413	0.529	1.53915e-07	PGC	MAFG.MA0659.1
1.03494e-10	0.552013	0.542	0.434	1.98708e-07	PGC	BCL6-HUMAN.H10MO.C
1.08498e-10	0.565603	0.554	0.411	2.08316e-07	PGC	SRY.SwissRegulon
1.08652e-10	0.279587	0.541	0.422	2.08613e-07	PGC	JUND-HUMAN.H10MO.A
1.24309e-10	-0.779189	0.417	0.539	2.38673e-07	PGC	USF1-HUMAN.H10MO.A
1.29041e-10	-0.842708	0.353	0.494	2.47758e-07	PGC	JDP2(var.2).MA0656.1
1.35781e-10	-0.401862	0.387	0.534	2.60699e-07	PGC	RAX2-HUMAN.H10MO.D
1.43279e-10	0.450373	0.566	0.44	2.75096e-07	PGC	NR1H2::RXRA.MA0115.1
1.59945e-10	-0.30257	0.403	0.524	3.07095e-07	PGC	FOXO6-HUMAN.H10MO.D
1.77152e-10	-0.559513	0.413	0.521	3.40132e-07	PGC	PAX6-HUMAN.H10MO.D
1.98835e-10	-0.532544	0.424	0.552	3.81763e-07	PGC	PBX1-HUMAN.H10MO.B
2.18578e-10	0.318731	0.545	0.423	4.19669e-07	PGC	ZBTB18.SwissRegulon
2.18968e-10	-0.245124	0.547	0.422	4.20419e-07	PGC	FOSL1::JUND.MA1142.1
2.49006e-10	-0.775338	0.432	0.545	4.78092e-07	PGC	POU2F3.SwissRegulon
2.53309e-10	-0.996821	0.371	0.486	4.86354e-07	PGC	FOSL2::JUNB(var.2).MA1139.1
2.56631e-10	-0.495465	0.41	0.515	4.92732e-07	PGC	ZNF691.SwissRegulon
2.64885e-10	-0.491701	0.428	0.533	5.08579e-07	PGC	PR.HOMER
3.52679e-10	0.436377	0.548	0.416	6.77144e-07	PGC	FOXA2-HUMAN.H10MO.A
3.53663e-10	0.392889	0.568	0.441	6.79033e-07	PGC	TBX2.MA0688.1
4.00142e-10	-0.415993	0.428	0.525	7.68273e-07	PGC	ATF3.SwissRegulon
4.25747e-10	-0.425865	0.419	0.533	8.17434e-07	PGC	HMBOX1.SwissRegulon
4.28574e-10	-0.123074	0.566	0.457	8.22861e-07	PGC	RARA(var.2).MA0730.1
4.71007e-10	0.281796	0.562	0.448	9.04334e-07	PGC	RXRB.MA0855.1
4.91209e-10	-0.621154	0.431	0.522	9.43121e-07	PGC	HSF4.SwissRegulon
4.93324e-10	-0.339662	0.404	0.539	9.47182e-07	PGC	E2F8.SwissRegulon
5.03861e-10	0.497176	0.551	0.455	9.67413e-07	PGC	PPARG-HUMAN.H10MO.A
5.34265e-10	0.398218	0.538	0.413	1.02579e-06	PGC	MAF::NFE2.MA0501.1
5.93511e-10	-0.560189	0.424	0.53	1.13954e-06	PGC	STAT1-HUMAN.H10MO.S
6.42022e-10	-0.831135	0.418	0.522	1.23268e-06	PGC	GCM1.SwissRegulon
8.38458e-10	-0.713623	0.421	0.519	1.60984e-06	PGC	PRDM1.HOMER
1.04307e-09	0.31387	0.546	0.438	2.0027e-06	PGC	SREBF2.MA0596.1
1.08797e-09	1.20799	0.406	0.535	2.08891e-06	PGC	RX-HUMAN.H10MO.D
1.11763e-09	-3.65384	0.427	0.467	2.14585e-06	PGC	TCF3.MA0522.2
1.12443e-09	0.400049	0.557	0.453	2.15891e-06	PGC	THB-HUMAN.H10MO.C
1.35649e-09	0.382615	0.406	0.549	2.60447e-06	PGC	EMX2-HUMAN.H10MO.D
1.39174e-09	-0.355813	0.44	0.563	2.67215e-06	PGC	HXA2-HUMAN.H10MO.D
1.39445e-09	0.286694	0.557	0.424	2.67735e-06	PGC	RXRG.MA0856.1
1.52342e-09	0.547099	0.552	0.447	2.92496e-06	PGC	SMAD2::SMAD3::SMAD4.MA0513.1
1.73711e-09	-4.5461	0.402	0.449	3.33525e-06	PGC	SOX6.SwissRegulon
1.82018e-09	-0.4724	0.429	0.527	3.49475e-06	PGC	ERF-HUMAN.H10MO.D
1.85084e-09	-0.507822	0.435	0.533	3.55361e-06	PGC	OLIG3.MA0827.1
2.03158e-09	0.114563	0.403	0.52	3.90063e-06	PGC	POU4F2.SwissRegulon
2.59405e-09	0.322749	0.554	0.442	4.98058e-06	PGC	HLTF-HUMAN.H10MO.D
2.81903e-09	0.504252	0.536	0.449	5.41254e-06	PGC	RORC.SwissRegulon
2.96772e-09	-0.487625	0.417	0.53	5.69803e-06	PGC	OLIG1.MA0826.1
3.01385e-09	-0.563723	0.441	0.549	5.78658e-06	PGC	FIGLA.SwissRegulon
3.06231e-09	0.595376	0.513	0.453	5.87963e-06	PGC	TAL1-HUMAN.H10MO.S
3.13952e-09	-0.480668	0.406	0.521	6.02787e-06	PGC	HSF4-HUMAN.H10MO.D
3.82391e-09	-0.402488	0.436	0.538	7.3419e-06	PGC	EGR3-HUMAN.H10MO.D
4.69085e-09	0.610052	0.529	0.423	9.00642e-06	PGC	TCFL2.HOMER
4.70144e-09	-0.45726	0.394	0.54	9.02676e-06	PGC	ATOH1-HUMAN.H10MO.D
6.06116e-09	0.117666	0.353	0.522	1.16374e-05	PGC	ALX3.MA0634.1
6.96698e-09	0.241195	0.562	0.448	1.33766e-05	PGC	NFKB1.MA0105.4
7.43323e-09	0.637672	0.522	0.436	1.42718e-05	PGC	GRHL1.MA0647.1
7.57983e-09	-1.63344	0.413	0.484	1.45533e-05	PGC	ZSCAN22.HOMER
7.85971e-09	-1.14616	0.407	0.496	1.50906e-05	PGC	HSF1.MA0486.2
8.06566e-09	-0.369027	0.417	0.516	1.54861e-05	PGC	ATF3-HUMAN.H10MO.A
9.13097e-09	-2.65085	0.4	0.452	1.75315e-05	PGC	TFCP2L1.SwissRegulon
9.14285e-09	-0.421174	0.407	0.526	1.75543e-05	PGC	ZNF669.HOMER
9.67311e-09	0.399192	0.533	0.448	1.85724e-05	PGC	PPARD.SwissRegulon
9.75885e-09	-0.514554	0.421	0.533	1.8737e-05	PGC	XBP1.SwissRegulon
1.18619e-08	-0.507918	0.443	0.554	2.27748e-05	PGC	PPARG-HUMAN.H10MO.S
1.255e-08	-0.92993	0.513	0.371	2.4096e-05	PGC	BORIS.HOMER
1.27874e-08	-0.475121	0.441	0.522	2.45519e-05	PGC	MAFF.MA0495.2
1.46527e-08	-0.547764	0.442	0.519	2.81332e-05	PGC	DDIT3-HUMAN.H10MO.C
1.61592e-08	-0.554765	0.415	0.507	3.10257e-05	PGC	SIN3A.SwissRegulon
1.67674e-08	0.247692	0.557	0.449	3.21935e-05	PGC	SOX21-HUMAN.H10MO.D
1.72452e-08	0.661537	0.494	0.37	3.31108e-05	PGC	SMC3.SwissRegulon
1.93514e-08	0.364368	0.527	0.442	3.71547e-05	PGC	ZNF282.SwissRegulon
1.99309e-08	0.450012	0.538	0.439	3.82673e-05	PGC	JUN.SwissRegulon
2.26672e-08	-0.472944	0.42	0.537	4.35211e-05	PGC	GATA5-HUMAN.H10MO.D
2.26672e-08	-0.472944	0.42	0.537	4.35211e-05	PGC	GATA5.SwissRegulon
2.36212e-08	-0.770066	0.406	0.494	4.53527e-05	PGC	STAT4.SwissRegulon
2.57435e-08	-0.386598	0.442	0.537	4.94276e-05	PGC	NRL-HUMAN.H10MO.D
2.62526e-08	-3.09946	0.431	0.476	5.0405e-05	PGC	SOX10-HUMAN.H10MO.D
2.81328e-08	-0.469677	0.431	0.532	5.40151e-05	PGC	GATA1-HUMAN.H10MO.A
3.16017e-08	-0.380008	0.422	0.525	6.06752e-05	PGC	PAX3.MA0780.1
3.48931e-08	-0.534657	0.379	0.513	6.69947e-05	PGC	FOSB::JUNB(var.2).MA1136.1
4.18928e-08	0.667041	0.559	0.453	8.04342e-05	PGC	FOXD2.SwissRegulon
4.26639e-08	-0.347494	0.406	0.506	8.19147e-05	PGC	RFX1-HUMAN.H10MO.C
4.26639e-08	-0.347494	0.406	0.506	8.19147e-05	PGC	RFX1.SwissRegulon
4.49616e-08	-0.0143414	0.523	0.438	8.63263e-05	PGC	TWST1-HUMAN.H10MO.D
4.49616e-08	-0.0143414	0.523	0.438	8.63263e-05	PGC	TWIST1.SwissRegulon
4.52606e-08	-0.515482	0.414	0.518	8.69004e-05	PGC	HRE.HOMER
4.77172e-08	0.381204	0.537	0.428	9.16171e-05	PGC	ZNF282.MA1154.1
5.11628e-08	-2.64936	0.436	0.534	9.82326e-05	PGC	SOX15.SwissRegulon
5.78507e-08	0.765314	0.538	0.444	0.000111073	PGC	FOXF2-HUMAN.H10MO.D
6.29176e-08	-0.475652	0.423	0.507	0.000120802	PGC	SPIC.SwissRegulon
6.62402e-08	-0.449344	0.441	0.519	0.000127181	PGC	ZBTB12.SwissRegulon
7.31946e-08	-1.16487	0.441	0.53	0.000140534	PGC	KLF14.MA0740.1
7.51898e-08	-0.276374	0.416	0.528	0.000144365	PGC	BHE22-HUMAN.H10MO.D
7.75971e-08	-0.472362	0.422	0.55	0.000148986	PGC	NOTO.SwissRegulon
8.36141e-08	-0.603776	0.436	0.547	0.000160539	PGC	CEBPA.MA0102.3
1.20968e-07	-0.824533	0.566	0.369	0.000232259	PGC	MZF1.MA0056.1
1.21734e-07	1.16469	0.384	0.509	0.000233729	PGC	RFX5.MA0510.2
1.46079e-07	0.24688	0.555	0.457	0.000280472	PGC	ESR1-HUMAN.H10MO.A
1.65685e-07	0.447399	0.537	0.419	0.000318115	PGC	EHF-HUMAN.H10MO.C
1.73946e-07	0.390971	0.541	0.436	0.000333977	PGC	REL.MA0101.1
2.19566e-07	-0.631139	0.381	0.493	0.000421567	PGC	FOS::JUN(var.2).MA1126.1
2.31414e-07	0.0034492	0.387	0.547	0.000444316	PGC	MNX1.MA0707.1
2.96725e-07	-0.874605	0.454	0.516	0.000569712	PGC	NGN2-HUMAN.H10MO.D
3.61695e-07	0.636962	0.534	0.453	0.000694454	PGC	RORG-HUMAN.H10MO.C
3.80337e-07	-1.03511	0.414	0.49	0.000730246	PGC	ZBT18-HUMAN.H10MO.D
4.14164e-07	0.242987	0.554	0.46	0.000795195	PGC	ZNF41.HOMER
4.50917e-07	-0.38656	0.443	0.542	0.00086576	PGC	TP53.MA0106.3
5.10593e-07	0.301841	0.52	0.447	0.000980339	PGC	GRHL2.MA1105.1
5.27977e-07	-2.0905	0.447	0.505	0.00101372	PGC	KLF14.HOMER
5.4174e-07	0.309318	0.535	0.43	0.00104014	PGC	ERE.HOMER
5.44589e-07	-0.48266	0.439	0.516	0.00104561	PGC	NR2E3.SwissRegulon
5.66631e-07	0.229288	0.56	0.436	0.00108793	PGC	TCF7L1.SwissRegulon
5.68125e-07	-4.5877	0.452	0.483	0.0010908	PGC	TCF4.MA0830.1
6.43427e-07	-0.27808	0.419	0.514	0.00123538	PGC	HXB13-HUMAN.H10MO.D
6.77124e-07	-0.32256	0.448	0.534	0.00130008	PGC	NR6A1-HUMAN.H10MO.B
6.87519e-07	-0.505025	0.457	0.519	0.00132004	PGC	TBX20.SwissRegulon
7.05884e-07	-1.43919	0.501	0.389	0.0013553	PGC	CTCF.SwissRegulon
9.01015e-07	-0.240841	0.458	0.549	0.00172995	PGC	NKX23-HUMAN.H10MO.D
1.05998e-06	-0.0125278	0.407	0.517	0.00203517	PGC	RFX3-HUMAN.H10MO.B
1.23699e-06	-0.0271602	0.516	0.43	0.00237503	PGC	FOS::JUN.MA0099.3
1.32793e-06	-0.621508	0.435	0.49	0.00254963	PGC	ZN350-HUMAN.H10MO.C
1.49883e-06	-0.394267	0.433	0.533	0.00287776	PGC	MAFG.MAFG-HUMAN.H10MO.C
1.53651e-06	-0.224183	0.453	0.533	0.00295009	PGC	DMC1.SwissRegulon
1.64772e-06	-2.00939	0.384	0.459	0.00316362	PGC	YY1.SwissRegulon
2.1059e-06	0.717084	0.513	0.447	0.00404334	PGC	POU4F1.MA0790.1
2.40216e-06	-0.21415	0.423	0.518	0.00461214	PGC	FOXI1.SwissRegulon
2.94955e-06	-0.329528	0.437	0.519	0.00566313	PGC	CRX.HOMER
3.2484e-06	0.306227	0.412	0.508	0.00623693	PGC	MEOX2-HUMAN.H10MO.D
3.25049e-06	-1.08929	0.409	0.509	0.00624094	PGC	PRDM9.HOMER
3.41862e-06	-0.33916	0.428	0.534	0.00656376	PGC	NR1A4::RXRA.MA1146.1
3.46855e-06	0.490337	0.523	0.432	0.00665962	PGC	FOXA3.SwissRegulon
3.74704e-06	0.883987	0.507	0.43	0.00719432	PGC	NR4A2.SwissRegulon
4.28717e-06	0.389651	0.519	0.439	0.00823137	PGC	TGIF1-HUMAN.H10MO.D
4.72977e-06	0.189116	0.552	0.454	0.00908115	PGC	PRD14-HUMAN.H10MO.C
4.8855e-06	-0.290733	0.45	0.532	0.00938016	PGC	ZNF232.SwissRegulon
5.02994e-06	-0.635537	0.428	0.504	0.00965748	PGC	HSF2.MA0770.1
5.39393e-06	-0.681362	0.437	0.501	0.0103563	PGC	YBX1.SwissRegulon
5.42869e-06	0.0883811	0.449	0.526	0.0104231	PGC	HOXC9.SwissRegulon
5.75711e-06	4.66521	0.493	0.444	0.0110537	PGC	VAX1.MA0722.1
5.75711e-06	4.66521	0.493	0.444	0.0110537	PGC	VAX2.MA0723.1
6.89766e-06	0.298517	0.53	0.455	0.0132435	PGC	ID4-HUMAN.H10MO.D
7.04632e-06	0.095913	0.398	0.496	0.0135289	PGC	RFX3.MA0798.1
7.28039e-06	-1.80503	0.442	0.471	0.0139784	PGC	HEN1-HUMAN.H10MO.C
7.41518e-06	-0.554426	0.444	0.515	0.0142371	PGC	SMARCC2.SwissRegulon
8.37409e-06	-0.336563	0.437	0.51	0.0160783	PGC	BATF3.SwissRegulon
8.84526e-06	0.15041	0.425	0.51	0.0169829	PGC	LHX3-HUMAN.H10MO.C
8.90317e-06	0.329785	0.55	0.466	0.0170941	PGC	SP2.MA0516.1
8.96035e-06	-0.268897	0.435	0.503	0.0172039	PGC	ETS1.HOMER
1.07893e-05	-0.288628	0.475	0.517	0.0207155	PGC	T.MA0009.2
1.22406e-05	-0.424277	0.444	0.514	0.0235019	PGC	RUNX1-HUMAN.H10MO.A
1.40765e-05	-0.314491	0.453	0.512	0.0270269	PGC	ZN333-HUMAN.H10MO.D
1.40765e-05	-0.314491	0.453	0.512	0.0270269	PGC	ZNF333.SwissRegulon
1.72586e-05	-0.320279	0.572	0.487	0.0331365	PGC	RARA::RXRG.MA1149.1
1.91115e-05	-0.514517	0.442	0.49	0.036694	PGC	STAT3.SwissRegulon
1.96236e-05	0.21908	0.509	0.421	0.0376773	PGC	BHA15-HUMAN.H10MO.D
2.08416e-05	-0.656384	0.448	0.501	0.0400158	PGC	LEF1-HUMAN.H10MO.C
2.08416e-05	-0.656384	0.448	0.501	0.0400158	PGC	LEF1.SwissRegulon
2.44306e-05	-0.30996	0.449	0.521	0.0469068	PGC	HNF1B.MA0153.2
2.51461e-05	-0.489127	0.478	0.532	0.0482805	PGC	RXRB-HUMAN.H10MO.C
2.51461e-05	-0.489127	0.478	0.532	0.0482805	PGC	RXRB.SwissRegulon
2.71917e-05	-0.0461724	0.52	0.43	0.0522081	PGC	TCF3.SwissRegulon
2.73527e-05	0.136633	0.558	0.475	0.0525172	PGC	SP8.MA0747.1
2.79174e-05	0.28238	0.538	0.47	0.0536014	PGC	THA-HUMAN.H10MO.C
3.06422e-05	0.362698	0.375	0.502	0.0588331	PGC	GSX1.MA0892.1
3.16219e-05	-0.00416572	0.549	0.436	0.0607141	PGC	RUNX1.SwissRegulon
3.4006e-05	-0.418406	0.464	0.514	0.0652915	PGC	SIX4.SwissRegulon
3.82504e-05	0.797728	0.465	0.416	0.0734408	PGC	TAL1::TCF3.MA0091.1
3.82646e-05	-0.497075	0.466	0.515	0.0734681	PGC	GLI2-HUMAN.H10MO.B
4.00214e-05	-1.2243	0.425	0.482	0.076841	PGC	HNF4G.SwissRegulon
4.46734e-05	-0.63053	0.441	0.499	0.0857729	PGC	ZNF784.SwissRegulon
4.46998e-05	-0.367574	0.453	0.522	0.0858235	PGC	CEBPA.SwissRegulon
5.32788e-05	0.253337	0.437	0.54	0.102295	PGC	BARHL2.SwissRegulon
5.79133e-05	-0.494895	0.43	0.522	0.111194	PGC	SOX17.SwissRegulon
6.22256e-05	-0.268625	0.42	0.484	0.119473	PGC	ATF1-HUMAN.H10MO.B
6.47687e-05	0.093833	0.538	0.443	0.124356	PGC	EOMES.MA0800.1
7.30987e-05	-0.226949	0.449	0.516	0.14035	PGC	FOSL2.SwissRegulon
8.10865e-05	-4.22898	0.48	0.468	0.155686	PGC	KLF9.MA1107.1
8.58369e-05	0.665357	0.523	0.459	0.164807	PGC	FOXP2-HUMAN.H10MO.A
8.58369e-05	0.665357	0.523	0.459	0.164807	PGC	FOXP2.SwissRegulon
9.95026e-05	0.221943	0.526	0.446	0.191045	PGC	KLF3-HUMAN.H10MO.D
9.95026e-05	0.221943	0.526	0.446	0.191045	PGC	KLF3.SwissRegulon
0.000104819	-2.38007	0.419	0.444	0.201253	PGC	MECP2-HUMAN.H10MO.C
0.000104819	-2.38007	0.419	0.444	0.201253	PGC	MECP2.SwissRegulon
0.000112125	-1.06277	0.455	0.489	0.21528	PGC	ZBT7A-HUMAN.H10MO.D
0.000112599	-0.378499	0.441	0.498	0.216191	PGC	GCR-HUMAN.H10MO.A
0.000135076	0.411395	0.518	0.436	0.259345	PGC	SP1-HUMAN.H10MO.C
0.000228054	0.890267	0.385	0.505	0.437864	PGC	LMX1B.MA0703.1
0.000233251	0.169324	0.526	0.443	0.447841	PGC	ZN524-HUMAN.H10MO.D
0.000238086	0.65778	0.392	0.49	0.457125	PGC	LHX2.MA0700.1
0.000251343	-0.0108282	0.542	0.471	0.482578	PGC	BATF-HUMAN.H10MO.S
0.000259526	0.44599	0.428	0.516	0.49829	PGC	EMX1-HUMAN.H10MO.D
0.000283501	1.09547	0.424	0.478	0.544323	PGC	ERR3-HUMAN.H10MO.B
0.000345546	0.258332	0.534	0.465	0.663448	PGC	FOSL2-HUMAN.H10MO.A
0.000388785	-0.755838	0.408	0.49	0.746467	PGC	CREB1.MA0018.3
0.000413948	0.156593	0.514	0.449	0.794781	PGC	ATF4.SwissRegulon
0.000450295	-0.231928	0.509	0.417	0.864566	PGC	ESRRG.SwissRegulon
0.000490275	-0.693896	0.455	0.503	0.941328	PGC	CBFB.SwissRegulon
0.000508213	-0.442982	0.445	0.484	0.975769	PGC	ZNF350.SwissRegulon
0.000530374	-0.461336	0.422	0.505	1	PGC	JUN::JUNB.MA1132.1
0.00055177	0.858902	0.45	0.525	1	PGC	VAX1-HUMAN.H10MO.D
0.000554598	0.237019	0.524	0.453	1	PGC	RELB.MA1117.1
0.000558498	-1.13554	0.445	0.492	1	PGC	SRF.SwissRegulon
0.000559888	7.57522	0.483	0.435	1	PGC	NOTO.MA0710.1
0.000561715	-0.307187	0.437	0.518	1	PGC	HXC11-HUMAN.H10MO.D
0.000599	0.0171833	0.45	0.521	1	PGC	DLX1-HUMAN.H10MO.D
0.000663421	-0.378086	0.441	0.508	1	PGC	SOX17-HUMAN.H10MO.D
0.000731875	0.3742	0.502	0.44	1	PGC	E2F6.SwissRegulon
0.000740005	-0.559782	0.466	0.503	1	PGC	ZIC4.SwissRegulon
0.000790319	-0.192672	0.458	0.526	1	PGC	ARID5B.SwissRegulon
0.000807349	0.310796	0.416	0.497	1	PGC	RFX2.MA0600.2
0.000848965	-0.218367	0.446	0.501	1	PGC	BRCA1-HUMAN.H10MO.D
0.000848965	-0.218367	0.446	0.501	1	PGC	BRCA1.SwissRegulon
0.000890103	-0.385832	0.443	0.48	1	PGC	ZIC3.SwissRegulon
0.000895995	-0.294412	0.447	0.515	1	PGC	BCL6B.SwissRegulon
0.000926803	-0.259742	0.446	0.493	1	PGC	DMBX1.SwissRegulon
0.000975961	0.197778	0.534	0.463	1	PGC	NANOG-HUMAN.H10MO.S
0.00116892	-0.186314	0.498	0.444	1	PGC	JDP2.MA0655.1
0.00117193	0.357073	0.512	0.457	1	PGC	HOXA9.SwissRegulon
0.0012845	-3.56394	0.366	0.421	1	PGC	CTCF-HUMAN.H10MO.A
0.00128935	0.0691874	0.528	0.445	1	PGC	MYBB-HUMAN.H10MO.D
0.00132798	-0.462309	0.452	0.509	1	PGC	HSF2-HUMAN.H10MO.A
0.00148788	2.13205	0.434	0.527	1	PGC	PDX1.SwissRegulon
0.00155695	-0.513621	0.436	0.502	1	PGC	BCL6B.MA0731.1
0.00160882	0.149152	0.476	0.415	1	PGC	TLX1.SwissRegulon
0.00178531	-2.1643	0.394	0.425	1	PGC	CTCFL.SwissRegulon
0.00207335	0.170726	0.517	0.475	1	PGC	HBP1-HUMAN.H10MO.D
0.00226254	0.349379	0.494	0.44	1	PGC	E2F6-HUMAN.H10MO.C
0.00230689	-0.251656	0.455	0.509	1	PGC	PAX7.MA0680.1
0.00248374	0.0247517	0.502	0.46	1	PGC	TF7L2-HUMAN.H10MO.A
0.00251071	-0.185598	0.454	0.528	1	PGC	GLIS2.MA0736.1
0.00252024	-0.248691	0.473	0.535	1	PGC	ZNF317.HOMER
0.00262493	-0.118793	0.466	0.526	1	PGC	TGIF2LX.SwissRegulon
0.00333589	0.177851	0.53	0.453	1	PGC	TEAD4.SwissRegulon
0.00344529	-1.044	0.441	0.475	1	PGC	NKX2-6.SwissRegulon
0.00358952	0.385256	0.514	0.466	1	PGC	SOX5.SwissRegulon
0.00374646	-0.369809	0.436	0.482	1	PGC	HSF4.MA0771.1
0.00386348	-0.224096	0.453	0.502	1	PGC	SREBF1.MA0595.1
0.00409469	0.0805424	0.531	0.453	1	PGC	RORA-HUMAN.H10MO.B
0.004525	0.379793	0.532	0.46	1	PGC	NR1H2.SwissRegulon
0.00488567	-0.183222	0.444	0.5	1	PGC	MYBA-HUMAN.H10MO.D
0.00505408	0.0799884	0.518	0.451	1	PGC	NKX2-8.SwissRegulon
0.00529892	-0.212436	0.468	0.516	1	PGC	BSX.SwissRegulon
0.00533637	-0.435022	0.458	0.483	1	PGC	NR2E3-HUMAN.H10MO.C
0.00535809	-0.394364	0.441	0.488	1	PGC	SIX5.SwissRegulon
0.00539038	0.658384	0.441	0.516	1	PGC	HOXD3.SwissRegulon
0.00548409	0.464836	0.572	0.486	1	PGC	PAX5-HUMAN.H10MO.S
0.00548409	0.464836	0.572	0.486	1	PGC	PAX5.SwissRegulon
0.00558871	-0.21836	0.444	0.501	1	PGC	NKX62-HUMAN.H10MO.D
0.0059886	0.241563	0.509	0.473	1	PGC	HLF-HUMAN.H10MO.C
0.0061124	-0.365695	0.451	0.497	1	PGC	NF2L2-HUMAN.H10MO.D
0.00706096	-0.670067	0.498	0.458	1	PGC	RELA.MA0107.1
0.00717214	-0.231134	0.448	0.485	1	PGC	STAT5.HOMER
0.00722395	-0.337761	0.472	0.517	1	PGC	KLF14.SwissRegulon
0.00760464	-0.434817	0.462	0.493	1	PGC	BHLHE23.MA0817.1
0.00768294	-0.373927	0.461	0.499	1	PGC	TBX3-HUMAN.H10MO.D
0.00768294	-0.373927	0.461	0.499	1	PGC	TBX3.SwissRegulon
0.0081735	0.567206	0.381	0.472	1	PGC	PAX4.MA0068.2
0.00835449	-0.78436	0.442	0.485	1	PGC	SOX9-HUMAN.H10MO.B
0.00857371	0.226705	0.498	0.473	1	PGC	ZNF410.MA0752.1
0.00995997	-0.204227	0.473	0.513	1	PGC	HAND1.SwissRegulon
0.0115593	-0.2584	0.466	0.517	1	PGC	PKNOX2.MA0783.1
0.0118722	0.130507	0.479	0.459	1	PGC	TBL1XR1.SwissRegulon
0.0124165	-0.297223	0.55	0.489	1	PGC	RARA::RXRA.MA0159.1
0.0144366	-0.474637	0.464	0.493	1	PGC	PTF1A-HUMAN.H10MO.C
0.015195	2.84799	0.465	0.457	1	PGC	HOXB3.MA0903.1
0.0159191	0.216331	0.517	0.477	1	PGC	RHOXF1.SwissRegulon
0.0186456	-0.340828	0.455	0.484	1	PGC	HSF2.SwissRegulon
0.0187111	-0.12405	0.468	0.509	1	PGC	HMBX1-HUMAN.H10MO.D
0.019173	-0.182045	0.463	0.486	1	PGC	STAT6-HUMAN.H10MO.C
0.0199774	2.54878	0.423	0.487	1	PGC	LHX6.MA0658.1
0.0209789	0.250456	0.493	0.468	1	PGC	GCR-HUMAN.H10MO.S
0.0215019	0.126274	0.509	0.453	1	PGC	DPRX.SwissRegulon
0.0215079	-0.0329361	0.521	0.452	1	PGC	UBP1.SwissRegulon
0.0216355	0.105879	0.517	0.49	1	PGC	FOSB.SwissRegulon
0.0238184	-0.164633	0.469	0.509	1	PGC	LXRE.HOMER
0.0258055	-0.445239	0.464	0.495	1	PGC	SCRT1.SwissRegulon
0.0258911	0.0475929	0.5	0.466	1	PGC	NFKB2.SwissRegulon
0.027391	-0.221743	0.499	0.509	1	PGC	NKX2-5.SwissRegulon
0.028954	0.0235748	0.499	0.468	1	PGC	FOS-HUMAN.H10MO.A
0.0300978	-0.360021	0.449	0.488	1	PGC	MECOM.SwissRegulon
0.0307386	0.164915	0.512	0.481	1	PGC	IRF8-HUMAN.H10MO.D
0.0335207	-1.85197	0.505	0.49	1	PGC	SP3.MA0746.1
0.0365293	0.190566	0.507	0.488	1	PGC	HLF.SwissRegulon
0.0378774	-0.137549	0.471	0.497	1	PGC	MYB.MA0100.3
0.0381854	0.532181	0.468	0.497	1	PGC	RORA.MA0071.1
0.0399613	-0.201315	0.473	0.498	1	PGC	THRA.SwissRegulon
0.0402603	-0.34589	0.467	0.482	1	PGC	SPI1-HUMAN.H10MO.A
0.0410072	-0.144229	0.433	0.49	1	PGC	DLX2.SwissRegulon
0.0445504	-1.54121	0.53	0.422	1	PGC	ZEB1.MA0103.3
0.0459161	0.339666	0.507	0.491	1	PGC	HOXA9.HOMER
0.0477499	0.189141	0.513	0.469	1	PGC	MAFK.MA0496.2
0.0483685	2.5738	0.411	0.484	1	PGC	NKX6-1.MA0674.1
0.0485183	0.0485177	0.507	0.453	1	PGC	THB-HUMAN.H10MO.S
0.0485274	-0.0994378	0.425	0.44	1	PGC	NR5A2.SwissRegulon
0.0491079	-0.120813	0.522	0.473	1	PGC	ZNF189.HOMER
0.0492329	0.163705	0.516	0.484	1	PGC	PBX1.SwissRegulon
0.0539228	0.032982	0.519	0.465	1	PGC	SREBF2.SwissRegulon
0.0576569	-0.00599757	0.489	0.467	1	PGC	MAFK.MAFK-HUMAN.H10MO.S
0.0586484	0.627935	0.479	0.447	1	PGC	NKX6-3.SwissRegulon
0.0590894	-0.530882	0.475	0.474	1	PGC	RUNX3.SwissRegulon
0.0598723	-0.236012	0.468	0.527	1	PGC	NFE2-HUMAN.H10MO.B
0.0603028	0.0562196	0.507	0.49	1	PGC	ARI5B-HUMAN.H10MO.C
0.07113	-0.636931	0.462	0.467	1	PGC	SPIC.MA0687.1
0.0731933	-0.0885675	0.54	0.492	1	PGC	SP1.MA0079.3
0.0738724	-0.034173	0.479	0.467	1	PGC	TP53.SwissRegulon
0.0742502	0.125058	0.506	0.459	1	PGC	FOXA1.SwissRegulon
0.077922	-0.026394	0.47	0.45	1	PGC	MSC.SwissRegulon
0.0812135	-0.266345	0.468	0.502	1	PGC	TBR1.MA0802.1
0.0842035	-0.0165407	0.477	0.517	1	PGC	GLIS3.MA0737.1
0.0848738	2.19274	0.415	0.516	1	PGC	PDX1.MA0132.2
0.0869082	-0.312714	0.528	0.453	1	PGC	SPIC-HUMAN.H10MO.D
0.0915731	0.231451	0.46	0.449	1	PGC	LMX1A.MA0702.1
0.0936638	0.114348	0.462	0.49	1	PGC	FOXB1.SwissRegulon
0.0941673	0.0594784	0.497	0.479	1	PGC	GFI1.SwissRegulon
0.0990628	0.117661	0.491	0.455	1	PGC	BHLHA15.SwissRegulon
0.11087	-0.176695	0.478	0.525	1	PGC	RXRG-HUMAN.H10MO.B
0.114317	-0.159303	0.481	0.458	1	PGC	ESR1-HUMAN.H10MO.S
0.11873	-0.180725	0.461	0.498	1	PGC	EHF-HUMAN.H10MO.S
0.124035	-0.172029	0.457	0.469	1	PGC	TFAP4.MA0691.1
0.125267	-1.99939	0.414	0.488	1	PGC	NKX6-2.MA0675.1
0.132227	-0.118815	0.484	0.444	1	PGC	ESR1.SwissRegulon
0.134083	0.0945999	0.504	0.475	1	PGC	FOXO1.SwissRegulon
0.136617	0.429565	0.48	0.454	1	PGC	OLIG3-HUMAN.H10MO.D
0.148604	-0.241883	0.479	0.516	1	PGC	HXA13-HUMAN.H10MO.C
0.149247	0.0469746	0.438	0.476	1	PGC	FOXC1.SwissRegulon
0.168705	-0.158899	0.464	0.496	1	PGC	EHF.SwissRegulon
0.169678	0.160391	0.478	0.459	1	PGC	SF1.HOMER
0.177716	-0.249446	0.436	0.492	1	PGC	JUND(var.2).MA0492.1
0.179624	0.0613487	0.458	0.495	1	PGC	TCF7L1.MA1421.1
0.180521	-0.0163623	0.473	0.5	1	PGC	POU6F2.SwissRegulon
0.18703	-0.33152	0.449	0.466	1	PGC	STAT3-HUMAN.H10MO.A
0.191109	-0.11174	0.526	0.471	1	PGC	ID4.MA0824.1
0.230757	0.286283	0.499	0.483	1	PGC	HOXA11.SwissRegulon
0.232184	0.00706398	0.504	0.498	1	PGC	CEBPG-HUMAN.H10MO.C
0.232184	0.00706398	0.504	0.498	1	PGC	CEBPG.SwissRegulon
0.251655	-0.312779	0.439	0.448	1	PGC	STAT4-HUMAN.H10MO.D
0.252529	0.042408	0.521	0.474	1	PGC	GATA.HOMER
0.253463	-0.0026621	0.448	0.478	1	PGC	FOXO4-HUMAN.H10MO.C
0.266862	0.133392	0.49	0.46	1	PGC	MAFK.MAFK-HUMAN.H10MO.A
0.272732	-0.293236	0.492	0.51	1	PGC	NR4A1.MA1112.1
0.280029	-0.173899	0.472	0.468	1	PGC	STAT5A.SwissRegulon
0.290776	-0.148965	0.487	0.498	1	PGC	ZNF143.SwissRegulon
0.295014	0.34731	0.462	0.505	1	PGC	VAX2-HUMAN.H10MO.D
0.2976	-0.0478277	0.458	0.49	1	PGC	FOXO3.SwissRegulon
0.299231	-0.158523	0.494	0.465	1	PGC	STAT1.HOMER
0.310201	0.00976232	0.475	0.445	1	PGC	CREM.SwissRegulon
0.312792	-2.35906	0.458	0.419	1	PGC	SOX10.MA0442.2
0.314912	-5.64065	0.565	0.422	1	PGC	KLF1.SwissRegulon
0.316746	-0.272212	0.47	0.453	1	PGC	NR4A2.MA0160.1
0.321212	1.82615	0.436	0.447	1	PGC	POU6F1.MA0628.1
0.326533	-0.0159131	0.486	0.48	1	PGC	NFE2L2.SwissRegulon
0.331579	-0.259294	0.496	0.491	1	PGC	GSC2-HUMAN.H10MO.D
0.338956	0.203557	0.483	0.464	1	PGC	FOXJ2-HUMAN.H10MO.C
0.353015	6.3922	0.471	0.462	1	PGC	EMX2.MA0886.1
0.361713	-0.0962348	0.45	0.459	1	PGC	STA5B-HUMAN.H10MO.C
0.362822	-0.159212	0.443	0.451	1	PGC	CREM-HUMAN.H10MO.C
0.375059	-0.0877507	0.506	0.501	1	PGC	PO2F3-HUMAN.H10MO.D
0.3805	0.132938	0.483	0.497	1	PGC	MEOX1.SwissRegulon
0.384469	-1.13038	0.436	0.404	1	PGC	CTCFL.MA1102.1
0.387347	-0.0795688	0.48	0.446	1	PGC	NR4A1-HUMAN.H10MO.C
0.391312	-0.24402	0.463	0.453	1	PGC	TCF7L2.MA0523.1
0.391649	-0.176766	0.496	0.492	1	PGC	GLIS3-HUMAN.H10MO.D
0.394436	-0.00331323	0.466	0.498	1	PGC	ZN282-HUMAN.H10MO.D
0.401732	-1.26902	0.536	0.454	1	PGC	KLF4.MA0039.3
0.405781	-0.426834	0.473	0.48	1	PGC	PTF1A.SwissRegulon
0.411448	0.0321236	0.504	0.469	1	PGC	HNF1B.SwissRegulon
0.439332	0.0513643	0.492	0.5	1	PGC	BHLHE22.SwissRegulon
0.453906	-0.651146	0.459	0.458	1	PGC	KLF13.SwissRegulon
0.457878	0.122561	0.499	0.48	1	PGC	NR4A2::RXRA.MA1147.1
0.461258	-0.12755	0.457	0.47	1	PGC	ZNF143-STAF.HOMER
0.463729	0.0883576	0.5	0.484	1	PGC	MEOX2.SwissRegulon
0.470059	-0.0874699	0.5	0.488	1	PGC	PKNOX1.MA0782.1
0.499182	-1.24991	0.452	0.457	1	PGC	NFIC::TLX1.MA0119.1
0.501641	-0.17028	0.484	0.474	1	PGC	REL.SwissRegulon
0.507752	-0.131708	0.455	0.493	1	PGC	OTX2.MA0712.1
0.507752	-0.131708	0.455	0.493	1	PGC	OTX2.SwissRegulon
0.511541	0.0845091	0.489	0.502	1	PGC	SRY.MA0084.1
0.511637	0.0951697	0.487	0.47	1	PGC	FOXA3-HUMAN.H10MO.C
0.512451	-0.578	0.455	0.46	1	PGC	STAT4.HOMER
0.528965	-0.176146	0.495	0.483	1	PGC	SIX2.MA1119.1
0.536907	-0.0570253	0.479	0.487	1	PGC	ISL2.SwissRegulon
0.542638	3.93899	0.463	0.5	1	PGC	MEOX2.MA0706.1
0.547104	-0.128263	0.473	0.492	1	PGC	OTX2-HUMAN.H10MO.C
0.585726	0.00910103	0.461	0.492	1	PGC	OLIG3.SwissRegulon
0.589569	0.00363844	0.467	0.489	1	PGC	PRGR-HUMAN.H10MO.S
0.589569	0.00363844	0.467	0.489	1	PGC	PGR.SwissRegulon
0.594658	0.0580506	0.493	0.485	1	PGC	NR6A1.SwissRegulon
0.595775	-0.0597448	0.494	0.485	1	PGC	TBX21-HUMAN.H10MO.D
0.601971	2.66746	0.404	0.447	1	PGC	VSX1.MA0725.1
0.601971	2.66746	0.404	0.447	1	PGC	VSX2.MA0726.1
0.61595	-0.0860087	0.503	0.49	1	PGC	MAFG.MAFG-HUMAN.H10MO.S
0.61595	-0.0860087	0.503	0.49	1	PGC	NF2L1-HUMAN.H10MO.C
0.61595	-0.0860087	0.503	0.49	1	PGC	NFE2L1.SwissRegulon
0.62577	-0.0905792	0.486	0.482	1	PGC	OSR2.SwissRegulon
0.627183	-0.173956	0.489	0.481	1	PGC	OTX1.SwissRegulon
0.628128	0.623948	0.478	0.456	1	PGC	FOXD1.SwissRegulon
0.666435	-0.124971	0.486	0.481	1	PGC	TFE3-HUMAN.H10MO.C
0.666435	-0.124971	0.486	0.481	1	PGC	TFE3.SwissRegulon
0.69763	-0.118681	0.484	0.484	1	PGC	PPARD-HUMAN.H10MO.D
0.707228	-0.203416	0.486	0.465	1	PGC	HSF1-HUMAN.H10MO.A
0.713846	-0.727086	0.417	0.397	1	PGC	CTCFL-HUMAN.H10MO.A
0.714516	0.0363737	0.49	0.474	1	PGC	TEAD3-HUMAN.H10MO.D
0.716885	-0.234303	0.489	0.463	1	PGC	NFIA-HUMAN.H10MO.C
0.717379	-0.0916106	0.483	0.488	1	PGC	SMAD2-HUMAN.H10MO.C
0.73791	-0.411398	0.472	0.466	1	PGC	HOXB13.HOMER
0.740149	-0.152968	0.479	0.473	1	PGC	SNAI2.SwissRegulon
0.774439	-2.06547	0.498	0.461	1	PGC	ITF2-HUMAN.H10MO.B
0.774439	-2.06547	0.498	0.461	1	PGC	TCF4.SwissRegulon
0.785164	-0.172974	0.494	0.475	1	PGC	ZIC4-HUMAN.H10MO.D
0.800289	-1.03842	0.523	0.488	1	PGC	KLF16.MA0741.1
0.806626	0.236636	0.46	0.47	1	PGC	JUN.MA0488.1
0.814605	-0.257671	0.474	0.468	1	PGC	SPIB-HUMAN.H10MO.B
0.845558	0.131153	0.471	0.509	1	PGC	LHX2.SwissRegulon
0.863042	-0.246228	0.472	0.469	1	PGC	SPIB.SwissRegulon
0.865625	0.133149	0.479	0.483	1	PGC	HCFC1.SwissRegulon
0.868961	-0.0533712	0.444	0.438	1	PGC	BC11A-HUMAN.H10MO.C
0.869935	-0.228708	0.475	0.489	1	PGC	ZNF264.HOMER
0.877051	-0.0119243	0.505	0.484	1	PGC	SIX1.MA1118.1
0.89685	-0.0052908	0.479	0.483	1	PGC	E2F8-HUMAN.H10MO.D
0.910621	3.06283	0.497	0.494	1	PGC	PDX1-HUMAN.H10MO.C
0.911516	0.174201	0.468	0.486	1	PGC	ZNF528.HOMER
0.948742	-0.0911861	0.476	0.49	1	PGC	TBP.SwissRegulon
0.969833	-0.139837	0.477	0.459	1	PGC	YBOX1-HUMAN.H10MO.D
0.972428	0.00615003	0.492	0.485	1	PGC	NR2E1.SwissRegulon
0.977262	0.0791342	0.472	0.505	1	PGC	NR4A3-HUMAN.H10MO.D
0.977262	0.0791342	0.472	0.505	1	PGC	NR4A3.SwissRegulon
0.987966	0.0180442	0.481	0.478	1	PGC	TBR1-HUMAN.H10MO.D
0.988853	5.59055	0.454	0.494	1	PGC	HOXA2.MA0900.1
0.999971	-0.177101	0.506	0.498	1	PGC	VDR-HUMAN.H10MO.S
1.94227e-53	-7.33657	0.113	0.545	3.72916e-50	FGC_mitotic	KLF1.SwissRegulon
1.2898e-47	-2.96089	0.198	0.575	2.47642e-44	FGC_mitotic	PAX5-HUMAN.H10MO.S
1.2898e-47	-2.96089	0.198	0.575	2.47642e-44	FGC_mitotic	PAX5.SwissRegulon
2.36713e-46	-8.85497	0.173	0.51	4.54489e-43	FGC_mitotic	TFAP2C.SwissRegulon
7.57188e-42	-2.43638	0.181	0.538	1.4538e-38	FGC_mitotic	KLF4.MA0039.3
8.57269e-41	-2.81825	0.181	0.562	1.64596e-37	FGC_mitotic	KLF4-HUMAN.H10MO.A
8.57269e-41	-2.81825	0.181	0.562	1.64596e-37	FGC_mitotic	KLF4.SwissRegulon
2.1182e-39	-7.07694	0.169	0.502	4.06694e-36	FGC_mitotic	TFAP2B.SwissRegulon
2.1287e-39	-8.17727	0.149	0.498	4.0871e-36	FGC_mitotic	TFAP2A(var.3).MA0872.1
3.08282e-38	-8.54671	0.161	0.498	5.91901e-35	FGC_mitotic	TFAP2C(var.3).MA0815.1
4.13014e-38	2.93075	0.69	0.401	7.92986e-35	FGC_mitotic	ATF2-HUMAN.H10MO.B
7.39004e-38	-7.14494	0.153	0.519	1.41889e-34	FGC_mitotic	POU3F4.MA0789.1
8.66535e-38	-6.43447	0.125	0.517	1.66375e-34	FGC_mitotic	PO2F1-HUMAN.H10MO.B
9.0343e-38	-10.3901	0.165	0.494	1.73458e-34	FGC_mitotic	TFAP2B(var.3).MA0813.1
7.07972e-37	-2.5546	0.194	0.559	1.35931e-33	FGC_mitotic	KLF5.HOMER
4.20416e-36	2.67412	0.694	0.421	8.07199e-33	FGC_mitotic	ATF2.SwissRegulon
1.64591e-35	-5.19551	0.161	0.518	3.16014e-32	FGC_mitotic	KLF9.MA1107.1
1.87925e-34	3.71712	0.677	0.392	3.60816e-31	FGC_mitotic	JUNB.SwissRegulon
3.71965e-34	3.33594	0.649	0.392	7.14173e-31	FGC_mitotic	FOSL2::JUND(var.2).MA1145.1
4.7756e-34	-6.80257	0.161	0.513	9.16915e-31	FGC_mitotic	POU5F1B.MA0792.1
8.92377e-34	-1.72914	0.21	0.543	1.71336e-30	FGC_mitotic	NR2F1.SwissRegulon
1.07047e-33	-3.39218	0.194	0.519	2.05531e-30	FGC_mitotic	SNAI2-HUMAN.H10MO.C
1.2234e-33	2.93609	0.661	0.393	2.34893e-30	FGC_mitotic	JDP2(var.2).MA0656.1
2.356e-33	2.99124	0.677	0.403	4.52351e-30	FGC_mitotic	FOSL2::JUN(var.2).MA1131.1
9.80004e-33	3.04635	0.677	0.398	1.88161e-29	FGC_mitotic	FOSB::JUN.MA1127.1
2.09769e-32	-3.94167	0.173	0.509	4.02756e-29	FGC_mitotic	PO5F1-HUMAN.H10MO.A
2.47563e-32	-12.8365	0.198	0.502	4.75321e-29	FGC_mitotic	AP2C-HUMAN.H10MO.A
3.408e-32	6.59308	0.714	0.398	6.54335e-29	FGC_mitotic	NFIA-HUMAN.H10MO.S
3.408e-32	6.59308	0.714	0.398	6.54335e-29	FGC_mitotic	NFIB.SwissRegulon
3.408e-32	6.59308	0.714	0.398	6.54335e-29	FGC_mitotic	NFIX.SwissRegulon
5.67267e-32	3.00877	0.649	0.402	1.08915e-28	FGC_mitotic	JDP2-HUMAN.H10MO.D
6.8342e-32	-5.99056	0.185	0.522	1.31217e-28	FGC_mitotic	POU2F1.MA0785.1
5.33715e-31	3.49994	0.69	0.41	1.02473e-27	FGC_mitotic	BATF3.MA0835.1
1.72789e-30	-14.8736	0.194	0.497	3.31756e-27	FGC_mitotic	TFAP2C.MA0524.2
2.01297e-30	2.66245	0.665	0.411	3.86491e-27	FGC_mitotic	JUN::JUNB(var.2).MA1133.1
2.02875e-29	-13.2033	0.206	0.522	3.8952e-26	FGC_mitotic	AP2A-HUMAN.H10MO.C
2.96739e-29	-14.5513	0.181	0.502	5.6974e-26	FGC_mitotic	TFAP2B.MA0811.1
6.05549e-29	-5.99011	0.202	0.514	1.16265e-25	FGC_mitotic	POU3F1.MA0786.1
1.34623e-28	2.70504	0.669	0.419	2.58476e-25	FGC_mitotic	CREB1.MA0018.3
1.57652e-28	2.9335	0.653	0.399	3.02691e-25	FGC_mitotic	FOSL2::JUNB(var.2).MA1139.1
2.04389e-28	-6.67676	0.173	0.517	3.92427e-25	FGC_mitotic	EBF1.SwissRegulon
4.52187e-28	-2.91451	0.202	0.503	8.68198e-25	FGC_mitotic	POU2F2.MA0507.1
4.75421e-28	2.55286	0.629	0.41	9.12808e-25	FGC_mitotic	CREB5-HUMAN.H10MO.D
1.37151e-27	-5.54106	0.169	0.528	2.63329e-24	FGC_mitotic	EBF1.HOMER
2.97904e-27	6.5876	0.677	0.409	5.71976e-24	FGC_mitotic	NFIC.MA0161.2
3.39011e-27	2.07285	0.69	0.419	6.50902e-24	FGC_mitotic	ATF7-HUMAN.H10MO.D
8.01703e-27	-5.76271	0.19	0.522	1.53927e-23	FGC_mitotic	POU3F2.MA0787.1
1.26772e-26	-3.66537	0.173	0.505	2.43402e-23	FGC_mitotic	TFAP2A.SwissRegulon
1.34339e-26	-3.93525	0.185	0.508	2.57931e-23	FGC_mitotic	POU5F1.MA1115.1
1.5483e-26	-12.3641	0.206	0.502	2.97274e-23	FGC_mitotic	TFAP2B(var.2).MA0812.1
2.73915e-26	-2.38079	0.206	0.533	5.25918e-23	FGC_mitotic	OCT4-SOX2-TCF-NANOG.HOMER
2.92296e-26	-3.96118	0.218	0.466	5.61208e-23	FGC_mitotic	SOX2.SwissRegulon
3.31998e-26	2.19424	0.738	0.422	6.37437e-23	FGC_mitotic	MSX1.MA0666.1
3.64283e-26	-3.84251	0.198	0.471	6.99424e-23	FGC_mitotic	KLF12-HUMAN.H10MO.D
9.89987e-26	-3.62628	0.222	0.52	1.90077e-22	FGC_mitotic	SOX13.MA1120.1
1.23347e-25	1.1321	0.694	0.418	2.36825e-22	FGC_mitotic	ETV6.MA0645.1
1.53652e-25	-13.5584	0.202	0.492	2.95012e-22	FGC_mitotic	TFAP2C(var.2).MA0814.1
1.76948e-25	3.37863	0.706	0.437	3.3974e-22	FGC_mitotic	NFIA.SwissRegulon
1.97194e-25	-13.7071	0.19	0.503	3.78613e-22	FGC_mitotic	TFAP2A(var.2).MA0810.1
3.2367e-25	-12.8046	0.206	0.501	6.21447e-22	FGC_mitotic	TFAP2A.MA0003.3
3.44498e-25	-4.81512	0.238	0.501	6.61435e-22	FGC_mitotic	TCF4.MA0830.1
4.09307e-25	-4.40671	0.226	0.485	7.85869e-22	FGC_mitotic	KLF10.HOMER
4.43808e-25	-1.29687	0.222	0.529	8.52112e-22	FGC_mitotic	KLF1-HUMAN.H10MO.C
4.47316e-25	1.97962	0.653	0.418	8.58847e-22	FGC_mitotic	JUNB(var.2).MA1140.1
4.56217e-25	1.6647	0.677	0.434	8.75936e-22	FGC_mitotic	STAT1.SwissRegulon
5.77216e-25	3.22248	0.702	0.439	1.10825e-21	FGC_mitotic	IRF7-HUMAN.H10MO.C
7.19071e-25	-6.65068	0.206	0.442	1.38062e-21	FGC_mitotic	SNAI1.SwissRegulon
9.40567e-25	-3.48333	0.238	0.485	1.80589e-21	FGC_mitotic	SOX10-HUMAN.H10MO.D
1.18878e-24	-11.7066	0.137	0.395	2.28245e-21	FGC_mitotic	NKX2-1.SwissRegulon
1.37278e-24	2.2271	0.706	0.433	2.63574e-21	FGC_mitotic	DLX6.MA0882.1
1.47592e-24	2.79811	0.661	0.422	2.83377e-21	FGC_mitotic	ATF7.MA0834.1
2.8442e-24	-3.06837	0.185	0.518	5.46087e-21	FGC_mitotic	POU5F1.SwissRegulon
3.54641e-24	2.39871	0.726	0.435	6.8091e-21	FGC_mitotic	IRF7.SwissRegulon
5.16419e-24	2.16471	0.669	0.406	9.91524e-21	FGC_mitotic	FOS::JUN(var.2).MA1126.1
7.65614e-24	-11.9433	0.149	0.386	1.46998e-20	FGC_mitotic	NKX21-HUMAN.H10MO.D
8.03181e-24	1.34328	0.714	0.448	1.54211e-20	FGC_mitotic	MYF6.MA0667.1
9.39066e-24	1.61458	0.653	0.41	1.80301e-20	FGC_mitotic	ELK4.SwissRegulon
9.68787e-24	0.323412	0.681	0.429	1.86007e-20	FGC_mitotic	FLI1.MA0475.2
1.12691e-23	1.09075	0.714	0.425	2.16367e-20	FGC_mitotic	FEV.SwissRegulon
[truncated: 7,601 more rows]

## Sheet: 4_TF_prioritization
cluster	TF	N_agreement	scRNA_DEGs_hit	scRNA_DEGs_avg_logFC	scRNA_DEGs_p_val_adj	scRNA_DEGs_pct.1	scRNA_DEGs_pct.2	scRNA_TFact_hit	scRNA_TFact_avg_log2FC	scRNA_TFact_p_val_adj	snATAC_PWM.1	snATAC_TFact_hit	snATAC_TFact_avg_log2FC	snATAC_TFact_p_val_adj
FGC_mitotic	HOXA5	3	1	0.188444	2.44748e-08	0.39	0.105	1	0.387836	4.44974e-10	HOXA5.MA0158.1.1	1	1.97306	7.78092e-06
FGC_mitotic	NFIA	3	1	0.170553	0.00535863	0.53	0.28	1	0.533669	5.66031e-16	NFIA-HUMAN.H10MO.S.1	1	6.59308	6.54335e-29
oogonia_meiosis	KLF10	3	1	0.567769	0.000155357	0.4	0.479	1	0.287064	2.02833e-09	KLF10.HOMER.3	1	1.25441	1.1797e-08
oogonia_meiosis	SOX30	3	1	0.35885	0.000129979	0.205	0.116	1	1.02672	8.16362e-62	SOX30.SwissRegulon.3	1	0.745179	0.00986644
oogonia_STRA8	HOXA2	3	1	0.149029	4.09075e-21	0.245	0.026	1	0.454477	2.40515e-07	HOXA2.HOMER.2	1	0.372519	2.84707e-32
oogonia_STRA8	HOXA3	3	1	0.13008	0.000610396	0.36	0.112	1	0.909221	2.49737e-25	HOXA3.SwissRegulon.2	1	0.487333	1.08254e-10
oogonia_STRA8	HOXA5	3	1	0.326445	2.20723e-29	0.505	0.086	1	0.407729	3.68634e-06	HOXA5.SwissRegulon.2	1	0.464942	1.36511e-13
oogonia_STRA8	PBX1	3	1	0.219813	3.43745e-05	0.605	0.4	1	0.418868	0.000343565	PBX1-HUMAN.H10MO.B.2	1	0.715645	7.10346e-12
oogonia_STRA8	ZIC1	3	1	0.149358	7.2337e-06	0.33	0.106	1	0.267895	0.000101971	ZIC1.SwissRegulon.2	1	0.319094	1.229e-16
PGC	ETV4	3	1	0.706501	2.46967e-62	0.785	0.178	1	0.625004	3.97384e-20	ETV4-HUMAN.H10MO.B	1	1.57133	9.74299e-76
PGC	KLF4	3	1	0.507356	8.78022e-32	0.775	0.301	1	0.77409	5.15407e-28	KLF4-HUMAN.H10MO.A	1	0.562786	2.35257e-54
PGC	NANOG	3	1	1.13474	9.25115e-94	0.91	0.185	1	1.1136	2.42241e-71	NANOG-HUMAN.H10MO.A	1	1.39239	3.14858e-33
PGC	POU5F1	3	1	1.40012	5.4225e-105	0.955	0.329	1	0.920451	2.43092e-53	POU5F1.MA1115.1	1	5.53902	1.26644e-212
PGC	SOX13	3	1	0.11446	2.03893e-05	0.255	0.078	1	0.580555	5.62463e-15	SOX13.MA1120.1	1	4.84688	4.13438e-255
PGC	STAT3	3	1	0.153186	0.00906776	0.55	0.318	1	0.255106	0.000407638	STAT3.MA0144.2	1	1.39063	1.62002e-62
PGC	TEAD2	3	1	0.259787	1.04079e-16	0.54	0.198	1	0.420776	1.45607e-06	TEAD2.MA1121.1	1	2.16744	1.84835e-39
PGC	TFAP2C	3	1	0.445586	1.5148e-33	0.665	0.203	1	0.42994	7.63962e-08	TFAP2C.MA0524.2	1	17.0014	0
pre-spermatogonia	CTCF	3	1	0.257232	0.000417367	0.535	0.422	1	0.29402	1.88571e-05	CTCF-HUMAN.H10MO.A.4	1	6.73094	1.18914e-92
pre-spermatogonia	EGR4	3	1	0.254015	1.30491e-24	0.21	0.018	1	0.562575	9.49502e-08	EGR4.MA0733.1.4	1	5.224	5.83408e-107
pre-spermatogonia	ETV6	3	1	0.136762	5.36611e-08	0.15	0.024	1	0.452486	2.73255e-11	ETV6.SwissRegulon.4	1	2.99402	4.90308e-68
pre-spermatogonia	ID4	3	1	0.788542	5.72796e-43	0.785	0.383	1	1.07081	2.70217e-34	ID4.SwissRegulon.4	1	2.7632	3.11038e-65
pre-spermatogonia	KLF10	3	1	0.176853	0.0117387	0.58	0.449	1	0.174981	0.00182305	KLF10.HOMER.4	1	5.46045	1.98401e-64
pre-spermatogonia	KLF7	3	1	0.259743	4.78365e-09	0.405	0.238	1	0.213985	9.90991e-06	KLF7.SwissRegulon.4	1	1.69561	3.34299e-26
pre-spermatogonia	MAFG	3	1	0.209217	0.00228053	0.4	0.306	1	0.416189	0.000134458	MAFG.MAFG.SwissRegulon.4	1	1.53924	3.50962e-39
pre-spermatogonia	NFIL3	3	1	0.110963	0.00570156	0.17	0.087	1	0.49508	0.0103914	NFIL3.SwissRegulon.4	1	1.35346	7.02239e-22
pre-spermatogonia	SIX1	3	1	0.282508	4.75488e-06	0.365	0.221	1	0.248581	0.00662991	SIX1.SwissRegulon.4	1	0.838481	6.36166e-14
pre-spermatogonia	SOX4	3	1	0.576897	2.72232e-16	0.885	0.672	1	0.126618	0.000292223	SOX4-HUMAN.H10MO.C.4	1	2.88055	1.37432e-50
pre-spermatogonia	TWIST1	3	1	0.2103	1.98423e-10	0.315	0.149	1	0.240868	0.0431655	TWIST1.SwissRegulon.4	1	2.28109	1.50705e-41
pre-spermatogonia	ZNF652	3	1	0.196647	0.000201793	0.37	0.228	1	0.147713	0.0316246	ZNF652.SwissRegulon.4	1	6.77706	2.06966e-85
FGC_mitotic	ALX1	2	0	0.0406429	1	0.075	0.023	1	0.132294	0.00511439	ALX1.SwissRegulon.1	1	0.829172	3.1522e-05
FGC_mitotic	ALX3	2	NA	NA	NA	NA	NA	1	0.278356	2.7479e-07	ALX3.MA0634.1.1	1	2.77942	1.16e-14
FGC_mitotic	ATF1	2	0	-0.0506821	1	0.25	0.181	1	0.815994	2.00534e-30	ATF1.SwissRegulon.1	1	2.4967	1.24616e-18
FGC_mitotic	ATF7	2	0	0.0273516	1	0.25	0.17	1	0.400965	7.26066e-08	ATF7.MA0834.1.1	1	2.79811	2.83377e-21
FGC_mitotic	BARX1	2	0	0.10168	0.0764203	0.27	0.105	1	0.352106	3.85025e-05	BARX1.MA0875.1.1	1	1.09444	6.1877e-14
FGC_mitotic	BATF3	2	NA	NA	NA	NA	NA	1	0.195938	8.54891e-05	BATF3.MA0835.1.1	1	3.49994	1.02473e-27
FGC_mitotic	BBX	2	0	0.0614696	1	0.895	0.667	1	0.38657	1.81126e-10	BBX.SwissRegulon.1	1	0.387018	0.000587904
FGC_mitotic	BSX	2	NA	NA	NA	NA	NA	1	0.255608	0.0120684	BSX.MA0876.1.1	1	2.454	7.04032e-17
FGC_mitotic	CDC5L	2	1	0.111013	0.0120104	0.895	0.619	1	0.379149	2.14786e-12	CDC5L-HUMAN.H10MO.D.1	0	0.403648	1
FGC_mitotic	DBP	2	0	-0.0594344	1	0.055	0.116	1	0.529562	9.89114e-20	DBP.MA0639.1.1	1	2.10938	1.77595e-17
FGC_mitotic	DLX2	2	0	0.0464375	0.37077	0.15	0.034	1	0.214883	9.60877e-05	DLX2.SwissRegulon.1	1	2.84209	2.10655e-14
FGC_mitotic	DLX6	2	0	-0.131356	1	0.18	0.155	1	0.285389	1.76437e-06	DLX6.MA0882.1.1	1	2.2271	2.63574e-21
FGC_mitotic	DMAP1	2	1	0.129463	0.0297111	0.8	0.55	1	0.199299	5.90239e-07	NA	NA	NA	NA
FGC_mitotic	E2F1	2	0	0.138944	0.606928	0.305	0.182	1	0.723735	1.50322e-23	E2F1-HUMAN.H10MO.A.1	1	0.688199	3.66522e-07
FGC_mitotic	E2F2	2	0	0.0379729	1	0.12	0.047	1	0.690798	9.00864e-15	E2F2.MA0864.1.1	1	0.388253	0.00187224
FGC_mitotic	E2F4	2	0	-0.0771274	1	0.33	0.289	1	1.02377	2.51129e-37	E2F4-HUMAN.H10MO.A.1	1	1.12393	5.14783e-08
FGC_mitotic	E2F7	2	0	0.0185113	1	0.12	0.06	1	0.581784	1.65991e-16	E2F7.MA0758.1.1	1	0.204515	0.000192816
FGC_mitotic	E2F8	2	0	0.0596718	1	0.165	0.053	1	0.911174	5.18e-34	E2F8.SwissRegulon.1	1	0.887941	4.32955e-10
FGC_mitotic	E4F1	2	0	-0.0477639	1	0.255	0.232	1	0.302489	1.46282e-09	E4F1-HUMAN.H10MO.D.1	1	0.748245	1.54032e-10
FGC_mitotic	EGR3	2	NA	NA	NA	NA	NA	1	0.455371	1.39655e-08	EGR3-HUMAN.H10MO.D.1	1	0.66999	3.85886e-05
FGC_mitotic	ELF1	2	0	-0.126039	1	0.17	0.186	1	0.363968	2.08486e-08	ELF1.MA0473.2.1	1	0.455042	2.4354e-13
FGC_mitotic	ELF4	2	NA	NA	NA	NA	NA	1	0.2326	4.72805e-08	ELF4.SwissRegulon.1	1	0.440055	0.000614241
FGC_mitotic	ELF5	2	NA	NA	NA	NA	NA	1	0.291089	0.000307291	ELF5.MA0136.2.1	1	1.59874	1.927e-15
FGC_mitotic	ELK4	2	0	-0.00287096	1	0.14	0.083	1	0.516046	2.47451e-10	ELK4.SwissRegulon.1	1	1.61458	1.80301e-20
FGC_mitotic	ESX1	2	1	0.320418	1.37821e-07	0.655	0.318	1	0.172696	0.00653478	ESX1.MA0644.1.1	0	-0.816887	1.55387e-18
FGC_mitotic	ETV1	2	0	-0.0513107	1	0.085	0.13	1	0.701681	4.2748e-15	ETV1.SwissRegulon.1	1	0.853499	1.36936e-07
FGC_mitotic	ETV2	2	NA	NA	NA	NA	NA	1	0.459414	1.52067e-18	ETV2.MA0762.1.1	1	1.46842	4.78972e-16
FGC_mitotic	ETV5	2	0	-0.294953	0.121927	0.38	0.412	1	0.246141	1.64985e-07	ETV5.MA0765.1.1	1	1.11367	1.08333e-19
FGC_mitotic	FOXJ3	2	0	-0.0585297	1	0.35	0.283	1	0.277284	2.01199e-06	FOXJ3-HUMAN.H10MO.S.1	1	0.459289	0.000168894
FGC_mitotic	FOXM1	2	1	0.118065	0.0161435	0.415	0.164	1	0.600116	3.51616e-25	FOXM1.SwissRegulon.1	0	0.461881	0.0663549
FGC_mitotic	GMEB2	2	0	-0.0166994	1	0.18	0.136	1	0.259008	3.14645e-07	GMEB2-HUMAN.H10MO.D.1	1	1.0394	1.04149e-08
FGC_mitotic	GSX1	2	NA	NA	NA	NA	NA	1	0.288664	1.13516e-07	GSX1.MA0892.1.1	1	2.52019	9.33607e-16
FGC_mitotic	GSX2	2	NA	NA	NA	NA	NA	1	0.292646	1.7166e-06	GSX2.MA0893.1.1	1	6.87854	6.31391e-18
FGC_mitotic	HLF	2	0	0.0558059	1	0.185	0.067	1	0.560376	5.97133e-15	HLF.MA0043.2.1	1	1.29949	7.9101e-13
FGC_mitotic	HOXA10	2	1	0.152987	3.21423e-05	0.45	0.145	0	-0.0395449	1	HOXA10.SwissRegulon.1	1	0.894009	6.66973e-07
FGC_mitotic	HOXA4	2	0	-0.0343366	1	0.215	0.107	1	0.31597	0.000572408	HOXA4.SwissRegulon.1	1	1.31448	2.47446e-13
FGC_mitotic	HOXA7	2	1	0.218359	3.91172e-09	0.7	0.299	1	0.668635	1.6812e-18	HOXA7.SwissRegulon.1	0	1.01088	0.751702
FGC_mitotic	HOXB5	2	1	0.349966	1.6277e-21	0.615	0.178	0	-0.0381858	1	HOXB5.SwissRegulon.1	1	0.397093	0.0105061
FGC_mitotic	HOXB8	2	0	-0.0277215	1	0.12	0.088	1	0.297143	0.00200948	HOXB8.SwissRegulon.1	1	1.95494	3.13385e-07
FGC_mitotic	HOXC10	2	0	-0.0451442	1	0.045	0.058	1	0.469779	2.48459e-08	HOXC10.SwissRegulon.1	1	0.431644	0.0286545
[truncated: 92,274 more rows]

## Sheet: 5_CCANs_germcells
Peak	X	CCAN	peaks_formatted	peak_width	exon	gene_id	gene	gene_name	annotation	promoter	tss_distance	ENCODE_blacklist	PGC	GC_mitotic	oogonia_STRA8	oogonia_meiosis	pre-spermatogonia
[truncated: 32,781 more rows]
