# Supplementary material for: Single-cell roadmap of human gonadal development
Source: Research Square preprint supplement (doi:10.21203/rs.3.rs-496470/v1), 2021-05-21
Supplement: Supplementary file 18 [file 7075104f5aaf9e53a5363d8d.xlsx]

## Sheet: 1_immune_DEGs_tfidf
gene	cluster	geneFrequency	geneFrequencyOutsideCluster	geneFrequencySecondBest	geneFrequencyGlobal	secondBestClusterName	tfidf	idf	qval
SMIM24	HSC/MPP	0.756646	0.0380072	0.649635	0.0559934	MEMP	2.18105	2.88252	0
SPINK2	HSC/MPP	0.470348	0.0114967	0.178832	0.0229809	MEMP	1.77467	3.77309	3.23716e-260
PRSS57	HSC/MPP	0.638037	0.0535461	0.952555	0.0681748	MEMP	1.71356	2.68568	2.06775e-243
TTN	HSC/MPP	0.472393	0.0179012	0.170616	0.0292763	mast	1.66801	3.53098	1.09646e-230
JCHAIN	HSC/MPP	0.584867	0.0459867	0.958333	0.0594738	pDC prec	1.65062	2.82222	1.10605e-224
C1QTNF4	HSC/MPP	0.490798	0.0322852	0.309038	0.0437609	NMP	1.53571	3.12902	1.71342e-196
GUCY1A1	HSC/MPP	0.501022	0.0471416	0.167883	0.0585014	MEMP	1.42226	2.8387	2.6951e-170
OCIAD2	HSC/MPP	0.699387	0.122789	0.562044	0.13722	MEMP	1.3891	1.98617	1.28599e-180
CLNK	HSC/MPP	0.349693	0.0112867	0.104265	0.0197564	mast	1.37229	3.92428	2.42849e-173
CTSW	HSC/MPP	0.687117	0.124783	0.850606	0.138858	NK	1.35658	1.97431	8.59844e-172
ISYNA1	HSC/MPP	0.646217	0.10998	0.806569	0.123401	MEMP	1.35209	2.09232	5.98768e-165
GNG11	HSC/MPP	0.568507	0.0817891	0.853982	0.0939707	mega	1.34439	2.36477	1.04525e-155
ITM2A	HSC/MPP	0.584867	0.0906609	0.69708	0.10303	MEMP	1.32925	2.27274	9.87533e-154
CYYR1	HSC/MPP	0.343558	0.0129141	0.379562	0.0211895	MEMP	1.32416	3.85425	3.70372e-162
NREP	HSC/MPP	0.740286	0.160953	0.832117	0.175453	MEMP	1.28838	1.74038	1.73719e-167
CD34	HSC/MPP	0.372188	0.0239383	0.346715	0.0326543	MEMP	1.27355	3.42178	1.56765e-144
ITGA4	HSC/MPP	0.852761	0.21366	0.875912	0.229655	MEMP	1.25456	1.47118	2.67435e-190
IL7R	HSC/MPP	0.511247	0.0784293	0.460079	0.089262	early T	1.23527	2.41618	4.4228e-130
KDM5B	HSC/MPP	0.593047	0.118589	0.591241	0.130464	MEMP	1.20784	2.03666	2.27649e-129
TMEM200A	HSC/MPP	0.263804	0.00472466	0.0287958	0.0112089	early T	1.18475	4.49104	1.3346e-149
TRH	HSC/MPP	0.337423	0.0223109	0.201166	0.0301976	NMP	1.18098	3.49999	5.68561e-128
BAALC	HSC/MPP	0.308793	0.0146989	0.142336	0.0220596	MEMP	1.17774	3.81401	9.05501e-133
CD200	HSC/MPP	0.353783	0.027823	0.26601	0.0359812	pro-B	1.17624	3.32476	1.85959e-124
SCN3A	HSC/MPP	0.278119	0.00850438	0.08867	0.0152523	pro-B	1.16338	4.18302	1.27386e-137
TOX	HSC/MPP	0.472393	0.0777469	0.312173	0.0876241	early T	1.15013	2.4347	4.86202e-112
CDCA7	HSC/MPP	0.537832	0.107617	0.759124	0.118385	MEMP	1.14764	2.13382	2.3773e-113
AC090152.1	HSC/MPP	0.480573	0.0839939	0.5	0.0939195	MEMP	1.13671	2.36532	2.13409e-109
MDK	HSC/MPP	0.488753	0.0893485	0.390148	0.0993449	pro-B	1.12861	2.30916	6.85784e-108
MEST	HSC/MPP	0.560327	0.122736	0.821168	0.133688	MEMP	1.12752	2.01225	8.84169e-111
MLC1	HSC/MPP	0.464213	0.0793217	0.408759	0.0889549	MEMP	1.12322	2.41963	1.24163e-106
DBN1	HSC/MPP	0.388548	0.0469841	0.390511	0.0555328	MEMP	1.12321	2.89078	2.40238e-109
PTPRCAP	HSC/MPP	0.615542	0.149772	0.672761	0.161429	B cell	1.12256	1.82369	1.22808e-114
CXXC5	HSC/MPP	0.586912	0.136438	0.572993	0.147712	MEMP	1.12246	1.91249	7.19522e-112
TRBC2	HSC/MPP	0.496933	0.0957006	0.760471	0.105743	early T	1.11648	2.24675	1.18543e-105
EBPL	HSC/MPP	0.699387	0.193501	0.908759	0.206162	MEMP	1.1044	1.57909	1.33421e-122
ACY3	HSC/MPP	0.543967	0.120951	0.49387	0.131539	microglia-like mac	1.10341	2.02846	4.89719e-105
CD7	HSC/MPP	0.730061	0.209407	0.902778	0.222438	pDC prec	1.09736	1.50311	9.77359e-127
IGF2BP2	HSC/MPP	0.601227	0.150612	0.678832	0.16189	MEMP	1.09474	1.82084	8.19243e-108
DPPA4	HSC/MPP	0.288344	0.0170088	0.29927	0.0237998	MEMP	1.07785	3.73808	3.62743e-113
LAPTM4B	HSC/MPP	0.449898	0.0819991	0.806569	0.0912069	MEMP	1.07734	2.39462	1.56376e-97
BEX2	HSC/MPP	0.323108	0.0291354	0.445255	0.036493	MEMP	1.06969	3.31064	5.71069e-105
CDK6	HSC/MPP	0.595092	0.157069	0.864964	0.168032	MEMP	1.06141	1.7836	8.18288e-101
BEX3	HSC/MPP	0.703476	0.213765	0.89781	0.226021	MEMP	1.04616	1.48713	5.99781e-112
FHIT	HSC/MPP	0.525562	0.132815	0.474453	0.142645	MEMP	1.02348	1.9474	1.07928e-88
HADH	HSC/MPP	0.785276	0.261169	0.777372	0.274286	MEMP	1.01582	1.29358	1.61681e-122
PSIP1	HSC/MPP	0.756646	0.249724	0.864964	0.262412	MEMP	1.01227	1.33784	2.19474e-115
BCL11A	HSC/MPP	0.478528	0.111449	0.715278	0.120637	pDC prec	1.01207	2.11497	5.19482e-85
CTGF	HSC/MPP	0.278119	0.020001	0.26601	0.0264613	pro-B	1.01015	3.63207	1.14689e-99
JUP	HSC/MPP	0.523517	0.136543	0.46798	0.146228	pro-B	1.00651	1.92259	2.01592e-85
CALCRL	HSC/MPP	0.339468	0.0442543	0.277778	0.051643	pDC prec	1.00598	2.9634	3.09762e-89
MDFIC	HSC/MPP	0.460123	0.103627	0.590278	0.11255	pDC prec	1.00507	2.18436	1.65707e-83
DNMT3A	HSC/MPP	0.492843	0.121686	0.372263	0.130976	MEMP	1.00182	2.03274	2.00986e-83
PTPRK	HSC/MPP	0.308793	0.0321802	0.260099	0.0391033	pro-B	1.00097	3.24155	4.11427e-92
SOX4	HSC/MPP	0.94274	0.333561	0.894161	0.348807	MEMP	0.992927	1.05324	4.03255e-172
BCAS4	HSC/MPP	0.333333	0.0438343	0.263054	0.0510799	pro-B	0.991454	2.97436	6.19453e-87
MAGED2	HSC/MPP	0.666667	0.216284	0.766423	0.227557	MEMP	0.986904	1.48036	4.72754e-95
APP	HSC/MPP	0.570552	0.167778	0.6875	0.177859	pDC prec	0.985211	1.72677	2.00099e-84
RHOH	HSC/MPP	0.535787	0.149457	0.505236	0.159126	early T	0.984809	1.83806	4.64093e-82
ACAP1	HSC/MPP	0.537832	0.152291	0.543194	0.161941	early T	0.979137	1.82052	3.9674e-81
HOPX	HSC/MPP	0.378323	0.0674576	0.604307	0.075238	NK	0.978759	2.5871	1.2857e-80
STAP1	HSC/MPP	0.329243	0.0441493	0.317536	0.0512847	mast	0.977972	2.97036	1.23222e-84
SATB1	HSC/MPP	0.462168	0.112289	0.39267	0.121046	early T	0.975906	2.11158	4.92616e-78
SPN	HSC/MPP	0.496933	0.131923	0.781022	0.141058	MEMP	0.973283	1.95858	3.12026e-78
TFPI	HSC/MPP	0.337423	0.0492414	0.317518	0.0564541	MEMP	0.969865	2.87433	4.05086e-82
ANGPT1	HSC/MPP	0.259714	0.0182162	0.635036	0.0242604	MEMP	0.965852	3.71891	1.25554e-93
MARCKSL1	HSC/MPP	0.721881	0.250774	0.937956	0.262565	MEMP	0.96534	1.33726	9.95071e-100
KIT	HSC/MPP	0.286299	0.0285054	0.50237	0.0349575	mast	0.960137	3.35362	5.69722e-87
TOX2	HSC/MPP	0.296524	0.0334401	0.17362	0.0400246	NK	0.95429	3.21826	4.44027e-84
TSC22D1	HSC/MPP	0.525562	0.154076	0.80292	0.163374	MEMP	0.952169	1.81171	1.61255e-75
KHDRBS2	HSC/MPP	0.267894	0.0226784	0.133455	0.0288156	B cell	0.950175	3.54684	2.73075e-88
AC084033.3	HSC/MPP	0.480573	0.129876	0.963504	0.138653	MEMP	0.949507	1.97578	2.02984e-73
IFITM1	HSC/MPP	0.644172	0.219277	0.97712	0.229911	NK	0.946973	1.47006	9.54164e-85
EMID1	HSC/MPP	0.233129	0.0118641	0.350365	0.017402	MEMP	0.944445	4.05117	1.04915e-95
C11orf1	HSC/MPP	0.386503	0.0797417	0.631387	0.0874194	MEMP	0.941923	2.43704	4.81153e-73
SLC38A1	HSC/MPP	0.433538	0.106357	0.312248	0.114546	NK	0.939381	2.16678	2.93671e-71
UPF3A	HSC/MPP	0.631902	0.215812	0.759124	0.226226	MEMP	0.939146	1.48622	6.68342e-82
MTF2	HSC/MPP	0.627812	0.214552	0.667883	0.224895	MEMP	0.936771	1.49212	5.2267e-81
CCNB1IP1	HSC/MPP	0.533742	0.163893	0.781022	0.17315	MEMP	0.93597	1.7536	4.98171e-73
MYL6B	HSC/MPP	0.642127	0.222846	0.762774	0.23334	MEMP	0.93446	1.45526	3.08472e-82
BET1	HSC/MPP	0.488753	0.142632	0.427007	0.151295	MEMP	0.923021	1.88852	7.86363e-69
BZW2	HSC/MPP	0.554192	0.180639	0.879562	0.189989	MEMP	0.920397	1.66079	1.73622e-71
ADA	HSC/MPP	0.505112	0.153341	0.652778	0.162146	pDC prec	0.918931	1.81926	1.18991e-68
TFDP2	HSC/MPP	0.453988	0.123944	0.835766	0.132204	MEMP	0.918603	2.02341	1.81811e-67
FAM216A	HSC/MPP	0.351738	0.0664077	0.594891	0.073549	MEMP	0.917968	2.6098	1.37856e-70
PAICS	HSC/MPP	0.523517	0.164891	0.821168	0.173866	MEMP	0.915877	1.74947	6.67832e-69
HIST1H2AC	HSC/MPP	0.754601	0.285422	0.722543	0.297164	pre-B	0.915686	1.21347	1.5268e-96
EPB41L4A-AS1	HSC/MPP	0.658487	0.24101	0.832117	0.251459	MEMP	0.909025	1.38048	1.08765e-79
RAMP1	HSC/MPP	0.347648	0.0666702	0.175182	0.0737025	MEMP	0.906569	2.60772	1.01108e-68
RBPMS	HSC/MPP	0.218814	0.0107617	0.0912409	0.0159689	MEMP	0.905258	4.13711	1.11812e-90
DENND6B	HSC/MPP	0.429448	0.113812	0.277778	0.121712	pDC prec	0.904461	2.1061	5.6427e-65
TES	HSC/MPP	0.503067	0.157699	0.386861	0.166343	MEMP	0.902355	1.79371	1.16296e-65
ODF2L	HSC/MPP	0.441718	0.121949	0.306569	0.129952	MEMP	0.901365	2.04059	2.32617e-64
TSPAN32	HSC/MPP	0.347648	0.0678251	0.551095	0.0748285	MEMP	0.901298	2.59256	9.80482e-68
LINC00665	HSC/MPP	0.323108	0.054806	0.459854	0.0615211	MEMP	0.900947	2.78837	7.61017e-70
PAFAH1B3	HSC/MPP	0.607362	0.218122	0.821168	0.227864	MEMP	0.898293	1.47901	5.98358e-72
BEND5	HSC/MPP	0.286299	0.0371673	0.184236	0.0434026	pro-B	0.898186	3.13724	5.85035e-74
AC002454.1	HSC/MPP	0.261759	0.0267206	0.481752	0.0326031	MEMP	0.896091	3.42335	8.65607e-78
C19orf48	HSC/MPP	0.521472	0.17098	0.817518	0.179752	MEMP	0.894938	1.71618	3.7619e-65
HDAC9	HSC/MPP	0.494888	0.155756	0.363908	0.164244	cDC2	0.893966	1.8064	6.38895e-64
TPM2	HSC/MPP	0.333333	0.061788	0.923611	0.0685843	pDC prec	0.893231	2.67969	2.14977e-67
VPREB1	pro-B	0.893596	0.0273714	0.631985	0.0723718	pre-B	2.34653	2.62594	0
IGLL1	pro-B	0.854187	0.0327701	0.601156	0.0754427	pre-B	2.20755	2.58438	0
VPREB3	pro-B	0.915271	0.0535011	0.917148	0.09827	pre-B	2.12346	2.32004	0
DNTT	pro-B	0.568473	0.00188954	0.0366089	0.0313236	pre-B	1.96884	3.46338	0
CD24	pro-B	0.877833	0.0686174	0.882466	0.110656	pre-B	1.9324	2.20133	0
MZB1	pro-B	0.823645	0.0627868	0.895833	0.102313	pDC prec	1.87768	2.27971	0
CD79A	pro-B	0.854187	0.0715867	0.957952	0.112243	B cell	1.86818	2.18709	0
CD79B	pro-B	0.929064	0.10738	0.980732	0.150067	pre-B	1.76213	1.89668	0
ARPP21	pro-B	0.517241	0.0143065	0.400771	0.040434	pre-B	1.65935	3.20808	0
RAG1	pro-B	0.522167	0.0167359	0.489403	0.0429931	pre-B	1.64311	3.14671	0
MME	pro-B	0.536946	0.0203531	0.441233	0.0471901	pre-B	1.6396	3.05357	0
LINC01013	pro-B	0.428571	0.00345516	0.0655106	0.02554	pre-B	1.57179	3.66751	0
AKAP12	pro-B	0.616749	0.0524213	0.456647	0.0817382	pre-B	1.54448	2.50423	0
IGHM	pro-B	0.632512	0.0597096	0.912249	0.0894667	B cell	1.52681	2.41389	0
POU2AF1	pro-B	0.507389	0.0242941	0.472062	0.0493909	pre-B	1.52622	3.00799	0
CMTM8	pro-B	0.508374	0.0261837	0.354528	0.0512335	pre-B	1.51056	2.97136	0
RAG2	pro-B	0.425616	0.0106354	0.314066	0.0321937	pre-B	1.46241	3.43599	0
EBF1	pro-B	0.453202	0.0171678	0.250482	0.0398198	pre-B	1.46085	3.22339	0
LEF1	pro-B	0.464039	0.0346056	0.40146	0.0569147	MEMP	1.33003	2.8662	0
IGHV5-78	pro-B	0.452217	0.0309885	0.680154	0.0528713	pre-B	1.32947	2.93989	0
S1PR4	pro-B	0.584236	0.0975544	0.549133	0.122838	pre-B	1.22508	2.09689	2.03164e-289
NPPC	pro-B	0.330049	0.0101495	0.194605	0.0267683	pre-B	1.19495	3.62054	8.12854e-310
UHRF1	pro-B	0.517241	0.0767694	0.405114	0.099652	tissue-repair mac cycling	1.1928	2.30607	2.32371e-267
AL713998.1	pro-B	0.303448	0.00415699	0.1079	0.0197052	pre-B	1.1916	3.92687	0
CD19	pro-B	0.442365	0.0473465	0.511883	0.0678677	B cell	1.19005	2.69019	3.50749e-268
SOCS2	pro-B	0.48867	0.0670518	0.361314	0.0889549	MEMP	1.1824	2.41963	7.13446e-262
LINC00426	pro-B	0.331034	0.0116072	0.142582	0.0282015	pre-B	1.18126	3.56838	5.08936e-300
CD9	pro-B	0.592118	0.114884	0.723404	0.139677	SIGLEC15+ mac	1.16554	1.96843	9.53597e-264
P4HA2	pro-B	0.397044	0.0344437	0.427746	0.0532808	pre-B	1.16421	2.93218	5.55873e-263
MYB	pro-B	0.441379	0.0544728	0.759124	0.0745726	MEMP	1.14581	2.59598	9.81603e-247
BACH2	pro-B	0.406897	0.0479404	0.739884	0.0665882	pre-B	1.10238	2.70923	3.6396e-230
AC116366.3	pro-B	0.485714	0.0839497	0.335128	0.104821	NK	1.09553	2.2555	6.48937e-222
SSBP2	pro-B	0.809852	0.228689	0.601156	0.25888	pre-B	1.09443	1.35139	8.51198e-312
ZCCHC7	pro-B	0.558621	0.118717	0.443763	0.14157	HSC/MPP	1.09208	1.95496	4.80069e-226
PDLIM1	pro-B	0.500493	0.0934514	0.824818	0.114597	MEMP	1.08423	2.16633	2.28444e-217
FAM129C	pro-B	0.400985	0.049614	0.736031	0.0678677	pre-B	1.07873	2.69019	8.1932e-220
CD38	pro-B	0.669951	0.177671	0.764933	0.203245	pre-B	1.06746	1.59334	4.15412e-240
DEPP1	pro-B	0.364532	0.0375209	0.304432	0.0545092	pre-B	1.06056	2.90939	1.50122e-218
RASD1	pro-B	0.37931	0.0444852	0.5625	0.0618794	pDC prec	1.05546	2.78257	1.17325e-212
AC002454.1	pro-B	0.297537	0.0180856	0.481752	0.0326031	MEMP	1.01857	3.42335	4.31089e-222
JCHAIN	pro-B	0.359606	0.0430276	0.958333	0.0594738	pDC prec	1.01489	2.82222	1.37508e-197
QRSL1	pro-B	0.448276	0.0863791	0.352601	0.10518	pre-B	1.00956	2.25209	2.35271e-184
TCL1A	pro-B	0.389163	0.0584139	0.954296	0.0755963	B cell	1.00495	2.58235	2.4554e-187
ERG	pro-B	0.272906	0.012201	0.229927	0.0257447	MEMP	0.998708	3.65953	7.74043e-226
MND1	pro-B	0.373399	0.053879	0.426649	0.070478	tissue-repair mac cycling	0.990424	2.65245	2.51511e-183
TCF4	pro-B	0.710345	0.226475	0.861111	0.251612	pDC prec	0.980181	1.37987	5.6127e-217
GNG11	pro-B	0.412808	0.0764995	0.853982	0.0939707	mega	0.976197	2.36477	7.01297e-172
BCL7A	pro-B	0.4	0.0706689	0.499037	0.0877777	pre-B	0.973179	2.43295	8.31779e-172
GNG7	pro-B	0.616749	0.184365	0.652778	0.206828	pDC prec	0.971915	1.57587	2.27301e-186
ADA	pro-B	0.533005	0.141824	0.652778	0.162146	pDC prec	0.969675	1.81926	1.72244e-171
NPY	pro-B	0.252217	0.00879987	0.0306748	0.0214454	HSC/MPP	0.969079	3.84225	7.29235e-224
CTGF	pro-B	0.26601	0.0133348	0.278119	0.0264613	HSC/MPP	0.966167	3.63207	2.5323e-211
NUSAP1	pro-B	0.403941	0.0797927	0.745626	0.0966322	tissue-repair mac cycling	0.943947	2.33684	7.55586e-159
SOX4	pro-B	0.89064	0.319117	0.94274	0.348807	HSC/MPP	0.938054	1.05324	7.10067e-297
TOP2B	pro-B	0.582266	0.183016	0.635036	0.203757	MEMP	0.926285	1.59083	2.89731e-161
LTB	pro-B	0.609852	0.200022	0.784722	0.221312	pDC prec	0.919767	1.50818	4.66553e-164
TMEM243	pro-B	0.749754	0.269935	0.759152	0.294861	pre-B	0.915637	1.22125	8.85732e-206
SPTBN1	pro-B	0.427586	0.101495	0.420039	0.118436	pre-B	0.912205	2.13338	3.26947e-144
NREP	pro-B	0.522167	0.156454	0.832117	0.175453	MEMP	0.908772	1.74038	4.36697e-146
PAX5	pro-B	0.248276	0.0135507	0.267823	0.0257447	pre-B	0.908572	3.65953	3.4197e-190
ALDH5A1	pro-B	0.279803	0.0261297	0.156934	0.039308	MEMP	0.905534	3.23633	5.51596e-171
SLC8A1-AS1	pro-B	0.252217	0.0154943	0.235174	0.027792	HSC/MPP	0.903694	3.58301	8.23697e-185
MDK	pro-B	0.390148	0.0834098	0.488753	0.0993449	HSC/MPP	0.900913	2.30916	4.18429e-142
MAD2L1	pro-B	0.383251	0.0796307	0.580292	0.0954038	MEMP	0.900501	2.34964	1.15685e-142
JUP	pro-B	0.46798	0.128597	0.523517	0.146228	HSC/MPP	0.899734	1.92259	4.20152e-139
A1BG	pro-B	0.350739	0.0625169	0.486111	0.07749	pDC prec	0.897052	2.55761	5.72892e-146
TCF3	pro-B	0.385222	0.0822221	0.266423	0.0979629	MEMP	0.894934	2.32317	3.85039e-140
CCND3	pro-B	0.654187	0.233278	0.725664	0.255144	mega	0.893573	1.36593	1.93453e-164
HMCES	pro-B	0.430542	0.108784	0.370821	0.125499	SIGLEC15+ mac	0.893571	2.07546	1.20662e-136
CD72	pro-B	0.373399	0.0760136	0.517367	0.0914628	B cell	0.893104	2.39182	8.92222e-141
CDCA7	pro-B	0.416749	0.102035	0.759124	0.118385	MEMP	0.889265	2.13382	1.89774e-135
ZWINT	pro-B	0.390148	0.086649	0.572005	0.102416	tissue-repair mac cycling	0.889035	2.27871	3.14218e-137
CENPU	pro-B	0.396059	0.0903741	0.620438	0.106254	MEMP	0.887932	2.24192	2.91882e-136
CD200	pro-B	0.26601	0.0233763	0.353783	0.0359812	HSC/MPP	0.884419	3.32476	7.88459e-167
CARHSP1	pro-B	0.602956	0.211089	0.556231	0.231446	SIGLEC15+ mac	0.882369	1.46341	4.3626e-148
GAB1	pro-B	0.324138	0.0519354	0.233141	0.0660764	pre-B	0.880665	2.71694	1.63896e-144
TYMS	pro-B	0.438424	0.117907	0.740876	0.134558	MEMP	0.879372	2.00576	6.84121e-131
BIRC5	pro-B	0.363547	0.0749879	0.706595	0.0899785	tissue-repair mac cycling	0.875488	2.40818	8.17981e-135
LINC02202	pro-B	0.211823	0.00561464	0.0572597	0.0163272	HSC/MPP	0.871634	4.11493	5.65359e-200
AURKB	pro-B	0.331034	0.057766	0.636608	0.0719623	tissue-repair mac cycling	0.871154	2.63161	8.68899e-139
CDK1	pro-B	0.361576	0.0750418	0.729475	0.0899273	tissue-repair mac cycling	0.870948	2.40875	3.23924e-133
UBE2T	pro-B	0.365517	0.0776872	0.540146	0.09264	MEMP	0.869578	2.37903	4.26928e-132
ID3	pro-B	0.612808	0.222048	0.474164	0.242348	SIGLEC15+ mac	0.868581	1.41738	7.3168e-145
DCK	pro-B	0.586207	0.20866	0.618056	0.228273	pDC prec	0.865952	1.47721	1.10086e-138
BLNK	pro-B	0.528079	0.176807	0.770833	0.195056	pDC prec	0.863129	1.63447	2.96742e-129
SMC4	pro-B	0.519212	0.17211	0.76716	0.190142	tissue-repair mac cycling	0.861883	1.65998	7.29569e-128
CYFIP2	pro-B	0.411823	0.107812	0.506944	0.123605	pDC prec	0.860982	2.09066	1.78675e-124
IGLL5	pro-B	0.314286	0.0520974	0.816956	0.0657181	pre-B	0.855605	2.72238	5.01983e-136
UBE2C	pro-B	0.362562	0.0814663	0.794078	0.0960692	tissue-repair mac cycling	0.849368	2.34269	3.06617e-124
CCDC81	pro-B	0.197044	0.00345516	0.0349854	0.0135121	NMP	0.848112	4.30417	1.88633e-202
IGHD	pro-B	0.229557	0.0136587	0.303473	0.0248746	B cell	0.847961	3.69391	3.62223e-169
CD52	pro-B	0.743842	0.297522	0.899452	0.320708	B cell	0.845915	1.13722	2.84748e-175
PTPRK	pro-B	0.260099	0.0269935	0.308793	0.0391033	HSC/MPP	0.843122	3.24155	4.18415e-149
AC084033.3	pro-B	0.425616	0.122928	0.963504	0.138653	MEMP	0.840924	1.97578	2.95379e-116
CDK6	pro-B	0.470936	0.151433	0.864964	0.168032	MEMP	0.839963	1.7836	2.49476e-116
MARCKSL1	pro-B	0.627586	0.242563	0.937956	0.262565	MEMP	0.839243	1.33726	4.65068e-137
MSI2	pro-B	0.375369	0.0933434	0.507299	0.107995	MEMP	0.83545	2.22567	3.55484e-117
CDCA7L	pro-B	0.37931	0.0960428	0.485401	0.110759	MEMP	0.834636	2.2004	1.78547e-116
MKI67	pro-B	0.363547	0.0863251	0.846568	0.100727	tissue-repair mac cycling	0.834465	2.29534	3.98976e-118
CENPF	pro-B	0.375369	0.095179	0.777927	0.109735	tissue-repair mac cycling	0.829449	2.20969	7.62876e-115
TCL1A	pre-B	0.917148	0.0526316	0.954296	0.0755963	B cell	2.3684	2.58235	0
IGLL5	pre-B	0.816956	0.0452179	0.722121	0.0657181	B cell	2.22406	2.72238	0
VPREB3	pre-B	0.917148	0.0759241	0.915271	0.09827	pro-B	2.12782	2.32004	0
IGHM	pre-B	0.843931	0.0688785	0.912249	0.0894667	B cell	2.03715	2.41389	0
BACH2	pre-B	0.739884	0.0482149	0.413163	0.0665882	B cell	2.00452	2.70923	0
IGHV5-78	pre-B	0.680154	0.0357537	0.452217	0.0528713	pro-B	1.99958	2.93989	0
FAM129C	pre-B	0.736031	0.0496346	0.708333	0.0678677	pDC prec	1.98007	2.69019	0
CD24	pre-B	0.882466	0.0895946	0.877833	0.110656	pro-B	1.9426	2.20133	0
CD79B	pre-B	0.980732	0.127399	0.929064	0.150067	pro-B	1.86013	1.89668	0
LINC01781	pre-B	0.533719	0.0192965	0.440585	0.0329614	B cell	1.82127	3.41242	2.78874e-285
CD79A	pre-B	0.83237	0.0925916	0.957952	0.112243	B cell	1.82047	2.18709	0
ACSM3	pre-B	0.487476	0.0205584	0.29562	0.0329614	MEMP	1.66347	3.41242	2.37579e-244
VPREB1	pre-B	0.631985	0.0571008	0.893596	0.0723718	pro-B	1.65955	2.62594	3.7601e-246
MZB1	pre-B	0.710983	0.0857038	0.895833	0.102313	pDC prec	1.62084	2.27971	1.33149e-248
PCDH9	pre-B	0.549133	0.0386981	0.380256	0.0522571	B cell	1.62081	2.95158	3.10315e-231
IGLL1	pre-B	0.601156	0.0610968	0.854187	0.0754427	pro-B	1.55362	2.58438	1.79534e-217
RAG1	pre-B	0.489403	0.0308113	0.522167	0.0429931	pro-B	1.54001	3.14671	2.50278e-211
FCRLA	pre-B	0.44894	0.0254482	0.694698	0.0366977	B cell	1.48377	3.30504	2.0165e-199
POU2AF1	pre-B	0.472062	0.0378569	0.507389	0.0493909	pro-B	1.41996	3.00799	8.25071e-182
MME	pre-B	0.441233	0.0364372	0.536946	0.0471901	pro-B	1.34734	3.05357	1.41082e-165
AMN	pre-B	0.348748	0.0128293	0.276051	0.0217525	B cell	1.33502	3.82803	2.38861e-175
NEIL1	pre-B	0.406551	0.0294968	0.235832	0.0395127	B cell	1.31362	3.23113	3.73704e-160
CD19	pre-B	0.481696	0.056575	0.511883	0.0678677	B cell	1.29585	2.69019	4.16077e-152
ARPP21	pre-B	0.400771	0.030601	0.517241	0.040434	pro-B	1.28571	3.20808	7.65907e-154
RUBCNL	pre-B	0.684008	0.140176	0.45521	0.154622	B cell	1.27689	1.86677	6.16461e-165
GCSAM	pre-B	0.362235	0.0213997	0.174384	0.0304535	pro-B	1.26476	3.49156	9.48246e-154
CD9	pre-B	0.637765	0.126084	0.723404	0.139677	SIGLEC15+ mac	1.25539	1.96843	2.72072e-153
P4HA2	pre-B	0.427746	0.0430622	0.397044	0.0532808	pro-B	1.25423	2.93218	4.03273e-144
CD38	pre-B	0.764933	0.187917	0.669951	0.203245	pro-B	1.2188	1.59334	7.1086e-169
BCL7A	pre-B	0.499037	0.076555	0.4	0.0877777	pro-B	1.21413	2.43295	1.02585e-133
CD72	pre-B	0.499037	0.0803407	0.517367	0.0914628	B cell	1.19361	2.39182	3.3895e-129
S1PR4	pre-B	0.549133	0.111205	0.584236	0.122838	pro-B	1.15147	2.09689	3.0068e-122
AKAP12	pre-B	0.456647	0.0715074	0.616749	0.0817382	pro-B	1.14355	2.50423	4.88923e-118
C16orf74	pre-B	0.385356	0.0423261	0.3766	0.0514382	B cell	1.1435	2.96737	1.86306e-121
DTX1	pre-B	0.296724	0.015616	0.2	0.0230832	pro-B	1.11825	3.76865	2.73224e-129
BEST3	pre-B	0.265896	0.00862296	0.136946	0.0154571	pro-B	1.1087	4.16969	5.01262e-136
PTPRCAP	pre-B	0.601156	0.14943	0.672761	0.161429	B cell	1.09632	1.82369	4.44121e-115
RAG2	pre-B	0.314066	0.0245018	0.425616	0.0321937	pro-B	1.07912	3.43599	9.40915e-116
LHPP	pre-B	0.543353	0.126978	0.284148	0.138039	cDC2	1.07596	1.98022	4.63701e-106
PPP1R14A	pre-B	0.456647	0.0858615	0.630713	0.0957109	B cell	1.07149	2.34642	1.3967e-102
HRK	pre-B	0.263969	0.0113571	0.202925	0.0180674	B cell	1.05948	4.01365	6.93117e-123
CMTM8	pre-B	0.354528	0.042957	0.508374	0.0512335	pro-B	1.05343	2.97136	5.54223e-104
CCDC191	pre-B	0.300578	0.0246596	0.186472	0.0319889	B cell	1.0347	3.44236	1.50791e-107
SPIB	pre-B	0.360308	0.0495294	0.625	0.0577848	pDC prec	1.02725	2.85103	1.38458e-97
WASF1	pre-B	0.315992	0.0312319	0.324818	0.0387962	MEMP	1.0268	3.24943	5.07506e-103
RGS16	pre-B	0.460501	0.0987959	0.484461	0.108404	B cell	1.02318	2.22189	1.72478e-92
PDLIM1	pre-B	0.464355	0.105053	0.824818	0.114597	MEMP	1.00595	2.16633	5.69297e-89
DNASE1L3	pre-B	0.304432	0.0294442	0.638889	0.0367489	pDC prec	1.00573	3.30365	4.89254e-100
IRF4	pre-B	0.325626	0.0392765	0.451389	0.046883	pDC prec	0.996449	3.0601	1.14319e-94
MYB	pre-B	0.381503	0.066197	0.759124	0.0745726	MEMP	0.990375	2.59598	6.05729e-88
AL133467.1	pre-B	0.256262	0.014985	0.17931	0.0213942	pro-B	0.985234	3.84464	1.08958e-105
APBB2	pre-B	0.265896	0.0180346	0.129799	0.0246187	B cell	0.984945	3.70425	4.52408e-103
PAX5	pre-B	0.267823	0.0191388	0.248276	0.0257447	pro-B	0.980104	3.65953	2.03885e-101
AC007569.1	pre-B	0.22158	0.00673011	0.111517	0.0124373	B cell	0.972084	4.38706	2.38317e-114
GNG7	pre-B	0.589595	0.196383	0.652778	0.206828	pDC prec	0.929125	1.57587	1.83855e-80
TMEM243	pre-B	0.759152	0.282191	0.749754	0.294861	pro-B	0.927115	1.22125	5.7962e-106
CDHR3	pre-B	0.194605	0.00347021	0.0163599	0.00854745	HSC/MPP	0.926733	4.76212	1.34263e-114
AEBP1	pre-B	0.279383	0.0297071	0.291667	0.0363394	pDC prec	0.926115	3.31485	3.89682e-86
IGKC	pre-B	0.27553	0.030969	0.826389	0.0374655	pDC prec	0.904933	3.28434	5.01248e-82
TPD52	pre-B	0.304432	0.0444293	0.363803	0.0513359	B cell	0.903969	2.96937	3.84347e-77
SPTBN1	pre-B	0.420039	0.110206	0.427586	0.118436	pro-B	0.896103	2.13338	2.43837e-67
SMAD1	pre-B	0.294798	0.0413797	0.238424	0.0481114	pro-B	0.894486	3.03424	1.77181e-76
SOX4	pre-B	0.845857	0.335244	0.94274	0.348807	HSC/MPP	0.890887	1.05324	2.70587e-121
DEPP1	pre-B	0.304432	0.0476892	0.364532	0.0545092	pro-B	0.885709	2.90939	3.09216e-73
AFF3	pre-B	0.649326	0.245965	0.491773	0.256679	B cell	0.883036	1.35993	2.25773e-78
HIST1H2AC	pre-B	0.722543	0.285557	0.754601	0.297164	HSC/MPP	0.876784	1.21347	1.28259e-88
SYVN1	pre-B	0.391137	0.100689	0.247291	0.108404	pro-B	0.869063	2.22189	6.79687e-63
CDKN2D	pre-B	0.425819	0.123824	0.637168	0.131846	mega	0.862762	2.02612	6.55452e-61
NREP	pre-B	0.489403	0.166886	0.832117	0.175453	MEMP	0.851749	1.74038	1.14871e-59
IGLC2	pre-B	0.225434	0.0187181	0.652778	0.0242092	pDC prec	0.838843	3.72102	3.90275e-78
RHOH	pre-B	0.452794	0.151112	0.535787	0.159126	HSC/MPP	0.832262	1.83806	2.55744e-55
MARCKSL1	pre-B	0.620424	0.2528	0.937956	0.262565	MEMP	0.829665	1.33726	5.75611e-65
PPP2R3B	pre-B	0.267823	0.0420106	0.196059	0.048009	pro-B	0.813208	3.03637	2.64877e-63
CDC25B	pre-B	0.337187	0.0830748	0.363392	0.089825	tissue-repair mac cycling	0.812584	2.40989	4.49016e-55
SSBP2	pre-B	0.601156	0.24954	0.809852	0.25888	pro-B	0.812396	1.35139	7.21407e-60
EBF1	pre-B	0.250482	0.0340712	0.453202	0.0398198	pro-B	0.8074	3.22339	3.48353e-65
TMEM131L	pre-B	0.331407	0.0823913	0.230542	0.089006	pro-B	0.801689	2.41905	1.95875e-53
QRSL1	pre-B	0.352601	0.0984279	0.448276	0.10518	pro-B	0.794088	2.25209	1.52844e-50
LDLRAD4	pre-B	0.445087	0.16126	0.386503	0.168799	HSC/MPP	0.791829	1.77905	5.08121e-48
IGHV1-2	pre-B	0.186898	0.0111993	0.254113	0.0158665	B cell	0.77442	4.14354	1.10136e-74
RCSD1	pre-B	0.876686	0.408329	0.834483	0.42077	pro-B	0.75892	0.865669	7.32717e-104
LIG4	pre-B	0.235067	0.0348073	0.162562	0.0401269	pro-B	0.755908	3.21571	3.2534e-57
HIST1H1C	pre-B	0.601156	0.281561	0.629557	0.29005	pro-B	0.744052	1.2377	5.89484e-48
ZCCHC7	pre-B	0.379576	0.135075	0.558621	0.14157	pro-B	0.742056	1.95496	4.5659e-40
MAD1L1	pre-B	0.39499	0.146485	0.284722	0.153086	pDC prec	0.7413	1.87675	1.43509e-39
S1PR1	pre-B	0.22736	0.034597	0.197441	0.0397175	B cell	0.733456	3.22596	4.77766e-54
HMCES	pre-B	0.352601	0.119302	0.430542	0.125499	pro-B	0.731809	2.07546	2.46162e-39
STRBP	pre-B	0.306358	0.0867028	0.339468	0.0925376	HSC/MPP	0.729176	2.38014	5.40544e-42
JCHAIN	pre-B	0.258189	0.0540512	0.958333	0.0594738	pDC prec	0.728665	2.82222	1.43013e-47
RIPOR2	pre-B	0.33526	0.11131	0.4375	0.117259	pDC prec	0.718587	2.14337	5.64386e-38
BLK	pre-B	0.190751	0.018613	0.20841	0.0231856	B cell	0.718031	3.76422	7.93789e-60
HIST1H4H	pre-B	0.26975	0.0648825	0.239409	0.0703245	pro-B	0.716087	2.65464	1.63552e-43
UBE2J1	pre-B	0.510597	0.239129	0.708333	0.24634	pDC prec	0.715368	1.40104	4.38689e-37
TCF4	pre-B	0.514451	0.24444	0.861111	0.251612	pDC prec	0.709873	1.37987	2.20001e-36
TNFRSF17	pre-B	0.146435	0.00410116	0.243056	0.00788208	pDC prec	0.709211	4.84316	6.47409e-76
PLEKHG1	pre-B	0.171484	0.0120932	0.177331	0.0163272	B cell	0.705642	4.11493	2.64877e-63
NPPC	pre-B	0.194605	0.0221883	0.330049	0.0267683	pro-B	0.704574	3.62054	1.12066e-55
CXXC5	pre-B	0.368015	0.1417	0.586912	0.147712	HSC/MPP	0.703826	1.91249	5.29224e-34
CMTM7	pre-B	0.739884	0.376886	0.693596	0.386529	pro-B	0.703296	0.950549	4.23114e-59
YBX3	pre-B	0.714836	0.369262	0.791971	0.378442	MEMP	0.694601	0.971692	2.01065e-53
MS4A1	B cell	0.888483	0.0192723	0.239264	0.0436073	HSC/MPP	2.7832	3.13253	0
TCL1A	B cell	0.954296	0.050287	0.917148	0.0755963	pre-B	2.46433	2.58235	0
FCRLA	B cell	0.694698	0.0177452	0.44894	0.0366977	pre-B	2.29601	3.30504	0
IGHM	B cell	0.912249	0.065768	0.843931	0.0894667	pre-B	2.20207	2.41389	0
CD79A	B cell	0.957952	0.0878837	0.854187	0.112243	pro-B	2.09513	2.18709	0
IGLL5	B cell	0.722121	0.0468116	0.816956	0.0657181	pre-B	1.96589	2.72238	0
VPREB3	B cell	0.83181	0.0771418	0.917148	0.09827	pre-B	1.92983	2.32004	0
CD79B	B cell	0.926874	0.127692	0.980732	0.150067	pre-B	1.75798	1.89668	0
FAM129C	B cell	0.647166	0.0511821	0.736031	0.0678677	pre-B	1.741	2.69019	1.238e-283
CD24	B cell	0.778793	0.0914117	0.882466	0.110656	pre-B	1.71438	2.20133	7.75203e-303
SPIB	B cell	0.563071	0.043231	0.625	0.0577848	pDC prec	1.60533	2.85103	5.79808e-241
LINC01781	B cell	0.440585	0.0212206	0.533719	0.0329614	pre-B	1.50346	3.41242	1.01929e-217
PPP1R14A	B cell	0.630713	0.0803012	0.547445	0.0957109	MEMP	1.47992	2.34642	1.1755e-214
IGLC3	B cell	0.372943	0.00889895	0.534722	0.019091	pDC prec	1.47631	3.95854	8.93406e-224
CD19	B cell	0.511883	0.0550787	0.481696	0.0678677	pre-B	1.37706	2.69019	6.60769e-181
LIMS2	B cell	0.33638	0.0108999	0.0630542	0.0200123	pro-B	1.31572	3.91141	1.14077e-183
IGKC	B cell	0.393053	0.0272234	0.826389	0.0374655	pDC prec	1.29092	3.28434	4.24112e-165
CD72	B cell	0.517367	0.0791954	0.499037	0.0914628	pre-B	1.23745	2.39182	2.88934e-147
PTPRCAP	B cell	0.672761	0.146701	0.615542	0.161429	HSC/MPP	1.22691	1.82369	1.08114e-160
IGLC2	B cell	0.325411	0.0155337	0.652778	0.0242092	pDC prec	1.21086	3.72102	1.20044e-155
MZB1	B cell	0.517367	0.0903586	0.895833	0.102313	pDC prec	1.17945	2.27971	8.88195e-134
CYB561A3	B cell	0.585009	0.121479	0.604167	0.134456	pDC prec	1.17383	2.00652	4.65993e-137
RALGPS2	B cell	0.477148	0.0755621	0.237226	0.0868052	MEMP	1.16619	2.44409	7.2546e-130
LTB	B cell	0.765996	0.205624	0.784722	0.221312	pDC prec	1.15526	1.50818	5.51075e-164
IGHV5-78	B cell	0.383912	0.0433363	0.680154	0.0528713	pre-B	1.12866	2.93989	5.9531e-125
FCRL1	B cell	0.261426	0.00631878	0.142582	0.0134609	pre-B	1.12621	4.30796	5.4898e-152
PCDH9	B cell	0.380256	0.0428098	0.549133	0.0522571	pre-B	1.12236	2.95158	8.58569e-124
IGHD	B cell	0.303473	0.0168501	0.229557	0.0248746	pro-B	1.121	3.69391	5.52742e-136
BACH2	B cell	0.413163	0.0566058	0.739884	0.0665882	pre-B	1.11935	2.70923	1.38111e-120
C16orf74	B cell	0.3766	0.0420726	0.385356	0.0514382	pre-B	1.11751	2.96737	5.46468e-123
TPD52	B cell	0.363803	0.0423358	0.304432	0.0513359	pre-B	1.08026	2.96937	2.58315e-115
RGS16	B cell	0.484461	0.0975725	0.460501	0.108404	pre-B	1.07642	2.22189	1.22445e-109
SIT1	B cell	0.341865	0.0356485	0.625	0.0442215	pDC prec	1.06612	3.11854	1.26261e-114
POU2AF1	B cell	0.352834	0.0406508	0.507389	0.0493909	pro-B	1.06132	3.00799	4.92968e-112
AMN	B cell	0.276051	0.0144279	0.348748	0.0217525	pre-B	1.05673	3.82803	1.12546e-125
IGHV1-2	B cell	0.254113	0.00900427	0.186898	0.0158665	pre-B	1.05293	4.14354	5.20257e-132
GPR18	B cell	0.334552	0.0349113	0.177264	0.0433002	pre-B	1.05036	3.1396	8.11595e-112
CD52	B cell	0.899452	0.304039	0.766117	0.320708	mono	1.02288	1.13722	9.6226e-179
TSPAN13	B cell	0.391225	0.0656627	0.583333	0.0747774	pDC prec	1.01454	2.59324	1.09949e-97
AL139020.1	B cell	0.232176	0.00721394	0.119461	0.0135121	pre-B	0.999322	4.30417	6.32746e-125
BANK1	B cell	0.349177	0.0509715	0.310838	0.0593203	HSC/MPP	0.986357	2.8248	9.02102e-95
FCMR	B cell	0.577697	0.173029	0.557201	0.184359	NK	0.976811	1.69087	1.32208e-93
RAB30	B cell	0.270567	0.020536	0.129094	0.0275361	pre-B	0.971945	3.59226	1.64987e-104
SP140	B cell	0.316271	0.0456005	0.170929	0.0531784	NK	0.92797	2.9341	2.42846e-85
GNG7	B cell	0.586837	0.195882	0.652778	0.206828	pDC prec	0.924779	1.57587	8.96101e-84
JCHAIN	B cell	0.327239	0.0517614	0.958333	0.0594738	pDC prec	0.923541	2.82222	6.08766e-83
SMIM14	B cell	0.535649	0.170712	0.590278	0.180929	pDC prec	0.915771	1.70965	7.54981e-78
ISG20	B cell	0.513711	0.160444	0.484522	0.170335	NK	0.909263	1.76999	2.66547e-75
IGLV1-40	B cell	0.193784	0.00405455	0.115607	0.00936636	pre-B	0.905095	4.67063	6.05962e-115
CD69	B cell	0.687386	0.259281	0.880236	0.271266	early T	0.896801	1.30465	2.65131e-91
PDLIM1	B cell	0.413163	0.105998	0.824818	0.114597	MEMP	0.895048	2.16633	4.89358e-71
RNGTT	B cell	0.361974	0.0774577	0.27553	0.0854233	pre-B	0.890506	2.46014	1.89223e-72
CD22	B cell	0.246801	0.02101	0.182266	0.0273314	pro-B	0.888414	3.59972	2.9106e-89
LY9	B cell	0.297989	0.0483913	0.486111	0.0553793	pDC prec	0.862246	2.89355	4.99294e-73
HVCN1	B cell	0.482633	0.162235	0.479167	0.171205	pDC prec	0.851796	1.76489	8.82486e-63
RUBCNL	B cell	0.45521	0.145964	0.684008	0.154622	pre-B	0.849774	1.86677	8.21408e-62
CRIP1	B cell	0.533821	0.196093	0.617021	0.205548	SIGLEC15+ mac	0.844545	1.58207	9.12031e-64
CD55	B cell	0.76234	0.31952	0.784672	0.331917	MEMP	0.840762	1.10287	2.31108e-94
PARP15	B cell	0.277879	0.0423885	0.17341	0.0489815	pre-B	0.838171	3.01631	8.70133e-71
HLA-DQA1	B cell	0.740402	0.313412	0.923944	0.325366	ifn-induced mac	0.831327	1.1228	1.00552e-87
BIRC3	B cell	0.404022	0.124901	0.421801	0.132716	mast	0.815941	2.01955	1.72376e-55
HRK	B cell	0.202925	0.0127429	0.263969	0.0180674	pre-B	0.81447	4.01365	1.0378e-83
HHIP-AS1	B cell	0.210238	0.0153757	0.179191	0.0208312	pre-B	0.813894	3.8713	4.93902e-81
EEF1G	B cell	0.64351	0.275025	0.846715	0.285341	MEMP	0.807006	1.25407	4.95842e-67
MARCKSL1	B cell	0.601463	0.252804	0.937956	0.262565	MEMP	0.804309	1.33726	1.02489e-61
RHOH	B cell	0.427788	0.151387	0.535787	0.159126	HSC/MPP	0.7863	1.83806	1.30523e-49
BLK	B cell	0.20841	0.0178506	0.190751	0.0231856	pre-B	0.7845	3.76422	3.91595e-74
BCL7A	B cell	0.321755	0.0810384	0.499037	0.0877777	pre-B	0.782813	2.43295	1.78522e-53
AEBP1	B cell	0.235832	0.0305934	0.291667	0.0363394	pDC prec	0.781747	3.31485	3.38779e-66
IGLV1-47	B cell	0.151737	0.00221157	0.0655106	0.00639779	pre-B	0.766544	5.0518	1.75234e-96
CD9	B cell	0.387569	0.132536	0.723404	0.139677	SIGLEC15+ mac	0.7629	1.96843	7.16686e-46
NEIL1	B cell	0.235832	0.0338581	0.406551	0.0395127	pre-B	0.762004	3.23113	1.06482e-61
PIM2	B cell	0.416819	0.154705	0.459424	0.162043	early T	0.758566	1.81989	1.39225e-44
DNASE1L3	B cell	0.226691	0.031278	0.638889	0.0367489	pDC prec	0.748907	3.30365	8.90138e-61
FCRL5	B cell	0.142596	0.00131641	0.0231214	0.00527178	pre-B	0.747971	5.24539	5.71016e-98
RIPOR2	B cell	0.347349	0.110631	0.4375	0.117259	pDC prec	0.744499	2.14337	3.7182e-44
LBH	B cell	0.340037	0.11021	0.582461	0.116644	early T	0.730611	2.14862	5.03296e-42
PLEKHG1	B cell	0.177331	0.0116897	0.171484	0.0163272	pre-B	0.729703	4.11493	5.33605e-71
CD38	B cell	0.45521	0.195988	0.764933	0.203245	pre-B	0.725306	1.59334	5.45149e-39
TMEM243	B cell	0.585009	0.286504	0.759152	0.294861	pre-B	0.714443	1.22125	6.18956e-44
TAGAP	B cell	0.585009	0.291717	0.560209	0.299928	early T	0.704475	1.20421	3.09022e-42
HIST1H2AC	B cell	0.577697	0.289084	0.754601	0.297164	HSC/MPP	0.701017	1.21347	4.82109e-41
LINC00926	B cell	0.149909	0.00626613	0.0291545	0.0102876	NMP	0.686103	4.57681	1.44255e-71
BLNK	B cell	0.413163	0.188774	0.770833	0.195056	pDC prec	0.675302	1.63447	2.44767e-30
RBM38	B cell	0.391225	0.172239	0.38921	0.17837	pre-B	0.67443	1.72389	2.22585e-30
RASGRP2	B cell	0.389397	0.171397	0.708455	0.1775	NMP	0.673183	1.72878	3.27362e-30
EBF1	B cell	0.20841	0.0349639	0.453202	0.0398198	pro-B	0.671785	3.22339	8.22704e-48
AFF3	B cell	0.491773	0.249908	0.649326	0.256679	pre-B	0.668776	1.35993	1.01421e-30
KLHL14	B cell	0.146252	0.00652941	0.142582	0.0104412	pre-B	0.667202	4.562	4.24926e-68
NCF1	B cell	0.797075	0.427676	0.888889	0.438018	pDC prec	0.657981	0.825495	1.86187e-65
PAX5	B cell	0.179159	0.0213259	0.267823	0.0257447	pre-B	0.655637	3.65953	4.73137e-52
SOX4	B cell	0.617916	0.341056	0.94274	0.348807	HSC/MPP	0.650811	1.05324	2.8255e-36
LINC02397	B cell	0.140768	0.00610816	0.111753	0.00987819	pre-B	0.649985	4.61743	3.80683e-66
ODC1	B cell	0.424132	0.211732	0.832117	0.217678	MEMP	0.646689	1.52474	7.04115e-26
PPM1K	B cell	0.325411	0.131957	0.527778	0.137373	pDC prec	0.645959	1.98505	5.39447e-28
CCDC191	B cell	0.186472	0.0275394	0.300578	0.0319889	pre-B	0.641904	3.44236	8.95982e-47
S1PR1	B cell	0.197441	0.0351746	0.22736	0.0397175	pre-B	0.636936	3.22596	6.7584e-43
ALOX5	B cell	0.340037	0.150071	0.654028	0.155389	mast	0.633087	1.86182	3.28347e-25
TMEM159	B cell	0.23766	0.0655574	0.364964	0.0703757	MEMP	0.630728	2.65391	6.46077e-34
TCL1B	B cell	0.151737	0.0121637	0.136802	0.0160712	pre-B	0.626783	4.13072	8.35557e-55
CLEC4C	pDC prec	0.715278	0.00134062	0.00897308	0.00660252	cDC2	3.59091	5.0203	7.99359e-211
LILRA4	pDC prec	0.736111	0.00716717	0.0621572	0.0125397	B cell	3.22333	4.37886	7.04392e-175
SCT	pDC prec	0.652778	0.00629061	0.163599	0.0110554	HSC/MPP	2.94066	4.50484	5.0482e-152
PTCRA	pDC prec	0.638889	0.00562029	0.283186	0.0102876	mega	2.92407	4.57681	5.56904e-151
SMPD3	pDC prec	0.611111	0.00587811	0.0204499	0.0103388	HSC/MPP	2.79391	4.57185	4.78692e-141
IGKC	pDC prec	0.826389	0.0316077	0.393053	0.0374655	B cell	2.71414	3.28434	1.40136e-143
JCHAIN	pDC prec	0.958333	0.0527998	0.584867	0.0594738	HSC/MPP	2.70463	2.82222	1.86533e-159
DERL3	pDC prec	0.861111	0.0444983	0.197847	0.0505169	tissue-repair mac cycling	2.5708	2.98545	1.51377e-137
TPM2	pDC prec	0.923611	0.0622357	0.333333	0.0685843	HSC/MPP	2.47499	2.67969	4.87272e-139
IGLC2	pDC prec	0.652778	0.0195421	0.325411	0.0242092	B cell	2.429	3.72102	1.38138e-114
IGLC3	pDC prec	0.534722	0.0152625	0.372943	0.019091	B cell	2.11672	3.95854	8.13045e-92
DNASE1L3	pDC prec	0.638889	0.032278	0.304432	0.0367489	pre-B	2.11066	3.30365	6.31982e-93
MZB1	pDC prec	0.895833	0.0964216	0.823645	0.102313	pro-B	2.04224	2.27971	2.09641e-107
GZMB	pDC prec	0.708333	0.0543467	0.608345	0.0591668	NK	2.00274	2.8274	5.04023e-89
LIME1	pDC prec	0.493056	0.0140765	0.0942408	0.0176067	early T	1.99169	4.03947	1.10506e-83
CXCR3	pDC prec	0.555556	0.0238734	0.134817	0.027792	early T	1.99056	3.58301	1.67299e-83
AC023590.1	pDC prec	0.368056	0.00180468	0.0201097	0.00450404	B cell	1.98852	5.40278	1.14634e-90
SIT1	pDC prec	0.625	0.0399093	0.341865	0.0442215	B cell	1.94909	3.11854	3.2242e-82
IL3RA	pDC prec	0.909722	0.112509	0.276708	0.118385	microglia-like mac	1.94118	2.13382	7.78387e-103
FAM129C	pDC prec	0.708333	0.0631123	0.736031	0.0678677	pre-B	1.90555	2.69019	6.37275e-83
AC097375.1	pDC prec	0.3125	0.000257812	0.00295567	0.00255912	pro-B	1.86503	5.96809	1.87359e-90
SEL1L3	pDC prec	0.604167	0.0466124	0.147557	0.0507217	cDC2	1.80126	2.9814	2.70693e-72
ZFAT	pDC prec	0.479167	0.0200062	0.0547445	0.0233903	MEMP	1.79948	3.75543	4.38904e-71
SPIB	pDC prec	0.625	0.0535733	0.563071	0.0577848	B cell	1.78189	2.85103	1.06485e-71
CLIC3	pDC prec	0.694444	0.073631	0.815612	0.0782066	NK	1.76972	2.5484	9.0818e-74
UGCG	pDC prec	0.875	0.142725	0.504762	0.148122	neutro	1.67101	1.90972	9.04617e-82
RUNX2	pDC prec	0.569444	0.0494998	0.194274	0.053332	HSC/MPP	1.66917	2.93122	2.57284e-63
AC011893.1	pDC prec	0.319444	0.00324843	0.0347648	0.00557887	HSC/MPP	1.65752	5.18877	2.38076e-68
LAMP5	pDC prec	0.416667	0.0193874	0.0628116	0.0223155	cDC2	1.58436	3.80247	3.56152e-58
RASD1	pDC prec	0.5625	0.0581623	0.37931	0.0618794	pro-B	1.56519	2.78257	7.88015e-57
SERPINF1	pDC prec	0.930556	0.188976	0.768997	0.194442	SIGLEC15+ mac	1.5239	1.63762	8.74468e-80
PACSIN1	pDC prec	0.256944	0.000824997	0.00458115	0.00271266	early T	1.5185	5.90982	9.81458e-66
BCL11A	pDC prec	0.715278	0.116222	0.478528	0.120637	HSC/MPP	1.51279	2.11497	2.75838e-59
TSPAN13	pDC prec	0.583333	0.0710013	0.391225	0.0747774	B cell	1.51272	2.59324	4.27698e-54
EPHB1	pDC prec	0.256944	0.00134062	0.00591133	0.00322449	pro-B	1.47409	5.73698	1.98951e-61
ST6GALNAC4	pDC prec	0.569444	0.0724966	0.233577	0.0761593	MEMP	1.46628	2.57493	5.41646e-51
TMEM8B	pDC prec	0.409722	0.0267609	0.113659	0.0295834	cDC2	1.44244	3.52054	2.66093e-49
SELL	pDC prec	0.854167	0.180571	0.691529	0.185536	mono	1.43885	1.68451	2.31061e-65
C12orf75	pDC prec	0.840278	0.179231	0.453567	0.184103	tissue-repair mac cycling	1.42197	1.69226	5.35204e-63
RHEX	pDC prec	0.375	0.0200577	0.85782	0.0226738	mast	1.41996	3.78655	8.87289e-49
PTPRS	pDC prec	0.270833	0.00335155	0.0347648	0.00532296	HSC/MPP	1.41801	5.23573	6.94825e-55
IGLL5	pDC prec	0.520833	0.0623389	0.816956	0.0657181	pre-B	1.41791	2.72238	2.35165e-47
LY9	pDC prec	0.486111	0.0521811	0.297989	0.0553793	B cell	1.40659	2.89355	1.77522e-46
IRF4	pDC prec	0.451389	0.0438796	0.325626	0.046883	pre-B	1.3813	3.0601	5.1058e-45
IDH3A	pDC prec	0.618056	0.104878	0.346505	0.10866	SIGLEC15+ mac	1.37179	2.21953	1.00983e-46
PPM1J	pDC prec	0.277778	0.00541405	0.0568295	0.00742144	cDC2	1.36205	4.90338	3.97944e-50
SLAMF7	pDC prec	0.395833	0.0295452	0.146479	0.0322449	ifn-induced mac	1.35945	3.4344	1.86001e-44
CD7	pDC prec	0.902778	0.217387	0.858681	0.222438	NK	1.35697	1.50311	9.07208e-66
AC078864.2	pDC prec	0.229167	0.00118593	0.0219378	0.00286621	B cell	1.34172	5.85476	1.47047e-54
IRF7	pDC prec	0.965278	0.244302	0.405634	0.249616	ifn-induced mac	1.33964	1.38783	5.32034e-74
TNNI2	pDC prec	0.6875	0.138496	0.653495	0.142543	SIGLEC15+ mac	1.33933	1.94811	1.35789e-47
CCDC186	pDC prec	0.604167	0.109725	0.186094	0.113369	HSC/MPP	1.31534	2.17711	5.24353e-43
PLAC8	pDC prec	0.951389	0.250799	0.860058	0.255963	NMP	1.29648	1.36272	5.9609e-69
MDFIC	pDC prec	0.590278	0.109003	0.541033	0.11255	SIGLEC15+ mac	1.28938	2.18436	4.0067e-41
AC119428.2	pDC prec	0.25	0.00407342	0.0259222	0.00588597	cDC2	1.2838	5.13518	4.3376e-47
CARD11	pDC prec	0.423611	0.0465092	0.141104	0.0492886	HSC/MPP	1.2751	3.01006	6.48035e-39
BLNK	pDC prec	0.770833	0.190781	0.528079	0.195056	pro-B	1.2599	1.63447	8.7007e-48
PPP1R14B	pDC prec	0.701389	0.164845	0.576642	0.168799	MEMP	1.2478	1.77905	5.33436e-43
A1BG	pDC prec	0.486111	0.074456	0.364742	0.07749	SIGLEC15+ mac	1.24328	2.55761	7.28972e-37
MAP1A	pDC prec	0.319444	0.0182015	0.20354	0.0204217	mega	1.24301	3.89116	9.80999e-40
RPS6KA4	pDC prec	0.611111	0.127823	0.329013	0.131385	cDC2	1.24033	2.02962	6.4681e-39
CUX2	pDC prec	0.25	0.00525936	0.0286299	0.00706316	HSC/MPP	1.23822	4.95286	7.59681e-44
SULF2	pDC prec	0.472222	0.0705373	0.293478	0.0734978	mono	1.23274	2.6105	3.25004e-36
AL513493.1	pDC prec	0.270833	0.00922966	0.0595447	0.0111577	microglia-like mac	1.21756	4.49562	8.17259e-41
CYB561A3	pDC prec	0.604167	0.130968	0.585009	0.134456	B cell	1.21227	2.00652	3.98556e-37
LILRB4	pDC prec	0.625	0.141023	0.423818	0.14459	microglia-like mac	1.20866	1.93385	1.42207e-37
DRD4	pDC prec	0.236111	0.00469217	0.0143149	0.00639779	HSC/MPP	1.19279	5.0518	5.80641e-42
TCF4	pDC prec	0.861111	0.247087	0.710345	0.251612	pro-B	1.18822	1.37987	5.05832e-51
ADA	pDC prec	0.652778	0.158503	0.533005	0.162146	pro-B	1.18757	1.81926	2.11462e-37
APP	pDC prec	0.6875	0.174074	0.570552	0.177859	HSC/MPP	1.18715	1.72677	7.10637e-39
LTB	pDC prec	0.784722	0.217129	0.765996	0.221312	B cell	1.1835	1.50818	2.42224e-44
TNFRSF17	pDC prec	0.243056	0.00613592	0.146435	0.00788208	pre-B	1.17716	4.84316	3.02209e-40
TNFRSF21	pDC prec	0.430556	0.0623904	0.0990814	0.0651039	tissue-repair mac	1.17618	2.73177	4.89646e-33
CIB2	pDC prec	0.277778	0.0152109	0.0961145	0.0171461	HSC/MPP	1.12944	4.06599	1.05579e-34
PMEPA1	pDC prec	0.368056	0.0441889	0.119089	0.0465759	microglia-like mac	1.12871	3.06667	3.37722e-31
AC104024.1	pDC prec	0.194444	0.00185624	0.0402194	0.00327567	B cell	1.11246	5.72123	4.62241e-41
IRF8	pDC prec	0.958333	0.308446	0.526245	0.313236	tissue-repair mac cycling	1.11243	1.1608	8.17146e-59
CCDC50	pDC prec	0.972222	0.313705	0.618146	0.318559	cDC2	1.11217	1.14395	2.83561e-61
SLC15A4	pDC prec	0.430556	0.0737341	0.144011	0.076364	tissue-repair mac cycling	1.10749	2.57224	4.11036e-29
DCPS	pDC prec	0.569444	0.140971	0.368613	0.144129	MEMP	1.10304	1.93704	4.27858e-30
PLP2	pDC prec	0.972222	0.323605	0.793313	0.328386	SIGLEC15+ mac	1.08263	1.11357	1.92301e-59
PPP1R14A	pDC prec	0.458333	0.0930185	0.630713	0.0957109	B cell	1.07544	2.34642	2.74305e-27
SERPINF2	pDC prec	0.305556	0.0276374	0.18541	0.0296857	SIGLEC15+ mac	1.07467	3.51709	5.69921e-30
TTC39A	pDC prec	0.166667	0.000464061	0.00473934	0.00168902	mast	1.06393	6.38361	1.43096e-42
SLA2	pDC prec	0.375	0.0568733	0.427995	0.0592179	NK	1.05995	2.82653	3.97219e-27
CYFIP2	pDC prec	0.506944	0.120759	0.411823	0.123605	pro-B	1.05985	2.09066	9.42315e-27
UPK3A	pDC prec	0.368056	0.0542951	0.29013	0.0566076	cDC2	1.05691	2.87161	4.30685e-27
GPX7	pDC prec	0.618056	0.17887	0.686131	0.182107	MEMP	1.05265	1.70316	1.09821e-28
ADAM19	pDC prec	0.291667	0.0252655	0.129799	0.027229	B cell	1.05101	3.60347	3.80002e-29
ERN1	pDC prec	0.618056	0.179953	0.590969	0.183181	early T	1.04901	1.69728	1.70168e-28
PPM1K	pDC prec	0.527778	0.134475	0.32948	0.137373	pre-B	1.04767	1.98505	2.31978e-26
SLC20A1	pDC prec	0.576389	0.16072	0.345895	0.163783	tissue-repair mac cycling	1.04281	1.80921	4.89202e-27
DUSP5	pDC prec	0.611111	0.17856	0.535995	0.181748	early T	1.04203	1.70513	6.70316e-28
C12orf45	pDC prec	0.611111	0.179128	0.554745	0.182311	MEMP	1.04014	1.70204	8.32888e-28
CXXC5	pDC prec	0.541667	0.144787	0.586912	0.147712	HSC/MPP	1.03593	1.91249	5.82104e-26
TLR9	pDC prec	0.173611	0.00134062	0.0201097	0.0026103	B cell	1.03269	5.94829	4.42871e-38
MAPKAPK2	pDC prec	0.569444	0.160204	0.306864	0.16322	tissue-repair mac cycling	1.03221	1.81265	2.56972e-26
ALDH2	pDC prec	0.611111	0.182428	0.562313	0.185587	cDC2	1.02925	1.68423	3.10381e-27
GNG7	pDC prec	0.652778	0.203517	0.616749	0.206828	pro-B	1.02869	1.57587	1.32305e-28
ITGB7	pDC prec	0.381944	0.0671857	0.298569	0.0695056	HSC/MPP	1.0184	2.66635	1.06777e-24
GATA1	MEMP	0.770073	0.00965532	0.442478	0.0203194	mega	3.00034	3.89618	0
GATA2	MEMP	0.835766	0.019674	0.919431	0.0311188	mast	2.90006	3.46994	4.53014e-311
PRSS57	MEMP	0.952555	0.0555959	0.638037	0.0681748	HSC/MPP	2.55826	2.68568	7.87966e-291
KLF1	MEMP	0.536496	0.00218023	0.0486726	0.00967346	mega	2.48847	4.63837	4.18351e-248
HBD	MEMP	0.569343	0.00524294	0.300885	0.0131539	mega	2.46585	4.33104	4.92027e-237
TESPA1	MEMP	0.744526	0.0279797	0.526066	0.0380285	mast	2.43417	3.26942	3.39815e-234
TIMP3	MEMP	0.817518	0.0403862	0.492891	0.0512847	mast	2.42833	2.97036	1.14926e-242
ANGPT1	MEMP	0.635036	0.0155731	0.259714	0.0242604	HSC/MPP	2.36164	3.71891	1.11896e-217
MYL4	MEMP	0.59854	0.0118355	0.181416	0.0200635	mega	2.33961	3.90885	1.52883e-214
CAVIN2	MEMP	0.616788	0.021387	0.800885	0.0297369	mega	2.16824	3.51537	6.08692e-190
NFE2	MEMP	0.90146	0.0787479	0.473451	0.0902856	mega	2.16781	2.40478	4.60228e-226
HACD1	MEMP	0.715328	0.0454734	0.304703	0.0548674	HSC/MPP	2.07648	2.90284	4.16791e-184
GFI1B	MEMP	0.510949	0.0107973	0.446903	0.0178114	mega	2.05806	4.02791	7.56055e-176
CYTL1	MEMP	0.79562	0.0670162	0.271137	0.0772341	NMP	2.03752	2.56091	4.08932e-189
MYB	MEMP	0.759124	0.064836	0.441379	0.0745726	pro-B	1.97067	2.59598	9.87227e-176
GMPR	MEMP	0.572993	0.0243978	0.424779	0.0320913	mega	1.97062	3.43917	1.95666e-162
SVOPL	MEMP	0.481752	0.0103301	0.464455	0.0169413	mast	1.96458	4.078	6.66187e-164
FHL2	MEMP	0.543796	0.0213351	0.29646	0.0286621	mega	1.93166	3.55218	4.17906e-157
LAPTM4B	MEMP	0.806569	0.081032	0.449898	0.0912069	HSC/MPP	1.93143	2.39462	1.25877e-177
AC084033.3	MEMP	0.963504	0.126921	0.77551	0.138653	NMP	1.90367	1.97578	1.15134e-211
SMIM24	MEMP	0.649635	0.0475498	0.756646	0.0559934	HSC/MPP	1.87259	2.88252	5.39132e-153
DNAJC6	MEMP	0.379562	0.00238787	0.0884956	0.00767735	mega	1.84827	4.86948	3.42044e-161
CENPV	MEMP	0.532847	0.0241383	0.128319	0.0312724	mega	1.84632	3.46502	7.13268e-146
ICAM4	MEMP	0.645985	0.049782	0.148688	0.0581431	NMP	1.83773	2.84485	2.0808e-148
PRKAR2B	MEMP	0.580292	0.0352471	0.70354	0.0428908	mega	1.8274	3.1491	4.2363e-144
STXBP5	MEMP	0.576642	0.0346761	0.473934	0.0422766	mast	1.82422	3.16352	1.33011e-143
AL157895.1	MEMP	0.430657	0.00892857	0.587678	0.0148429	mast	1.81317	4.21024	4.78324e-146
PKIG	MEMP	0.656934	0.0560631	0.22266	0.0644897	pro-B	1.80082	2.74125	1.17498e-144
C2orf88	MEMP	0.419708	0.00820183	0.513274	0.0139728	mega	1.79242	4.27064	3.51296e-144
PDLIM1	MEMP	0.824818	0.104495	0.792035	0.114597	mega	1.78683	2.16633	5.50439e-163
DLC1	MEMP	0.50365	0.0222695	0.270142	0.0290204	mast	1.7828	3.53976	6.95948e-138
MINPP1	MEMP	0.605839	0.0470826	0.118483	0.0549186	mast	1.75809	2.9019	2.01819e-136
ITGA2B	MEMP	0.441606	0.012718	0.809735	0.0187327	mega	1.75648	3.97748	5.45868e-137
PYCR1	MEMP	0.543796	0.032392	0.145194	0.0395639	HSC/MPP	1.75637	3.22984	2.19232e-134
KLHL23	MEMP	0.50365	0.024294	0.239264	0.0310165	HSC/MPP	1.74929	3.47324	1.59842e-133
CD82	MEMP	0.759124	0.0919331	0.64455	0.10129	mast	1.73822	2.28977	2.81002e-147
KCNH2	MEMP	0.357664	0.0030108	0.180095	0.00798444	mast	1.72761	4.83026	1.27417e-144
PNMT	MEMP	0.361314	0.00347799	0.156398	0.00849626	mast	1.72279	4.76813	7.4669e-143
NPR3	MEMP	0.390511	0.00690407	0.190184	0.0122838	HSC/MPP	1.71804	4.39948	1.159e-136
TFDP2	MEMP	0.835766	0.122197	0.453988	0.132204	HSC/MPP	1.6911	2.02341	2.20315e-153
ISYNA1	MEMP	0.806569	0.113684	0.646217	0.123401	HSC/MPP	1.6876	2.09232	4.99932e-148
MPIG6B	MEMP	0.434307	0.0148463	0.836283	0.0207288	mega	1.68347	3.87623	2.0789e-127
CPA3	MEMP	0.423358	0.0132371	0.890995	0.0189886	mast	1.67815	3.96391	1.95318e-127
FAM178B	MEMP	0.317518	0.000674834	0.0138889	0.00511823	pDC prec	1.67489	5.27495	1.09669e-149
NMNAT3	MEMP	0.419708	0.0128218	0.0552147	0.018528	HSC/MPP	1.67399	3.98847	3.72162e-127
MEST	MEMP	0.821168	0.12391	0.560327	0.133688	HSC/MPP	1.65239	2.01225	3.11387e-146
AC002454.1	MEMP	0.481752	0.0262147	0.297537	0.0326031	pro-B	1.6492	3.42335	5.12562e-121
MYH10	MEMP	0.379562	0.00778654	0.0521327	0.0130003	mast	1.64836	4.34278	1.28158e-127
NET1	MEMP	0.635036	0.0666528	0.253579	0.0746238	HSC/MPP	1.64811	2.5953	1.14903e-124
RAC3	MEMP	0.50365	0.0328592	0.19242	0.0394616	NMP	1.62801	3.23243	4.38641e-118
CMBL	MEMP	0.427007	0.0165594	0.102249	0.0223155	HSC/MPP	1.62368	3.80247	7.62275e-120
CDCA7	MEMP	0.759124	0.109271	0.537832	0.118385	HSC/MPP	1.61983	2.13382	3.04735e-133
TFR2	MEMP	0.328467	0.00280316	0.0575221	0.00737025	mega	1.61287	4.9103	7.58439e-132
CPXM1	MEMP	0.430657	0.0180129	0.175869	0.0237998	HSC/MPP	1.60983	3.73808	8.69062e-118
TESMIN	MEMP	0.474453	0.0278758	0.233236	0.0341386	NMP	1.60238	3.37733	3.15676e-115
MYC	MEMP	0.715328	0.0984219	0.367781	0.107073	SIGLEC15+ mac	1.59822	2.23424	1.52584e-125
EEF1E1	MEMP	0.594891	0.0609946	0.212679	0.0684819	HSC/MPP	1.59501	2.68119	4.22551e-116
CKB	MEMP	0.620438	0.0695598	0.705167	0.0772853	SIGLEC15+ mac	1.58848	2.56025	1.17283e-116
TAL1	MEMP	0.478102	0.0299522	0.30531	0.0362371	mega	1.58619	3.31767	3.86179e-113
RAB38	MEMP	0.445255	0.0225291	0.191489	0.0284574	SIGLEC15+ mac	1.58482	3.55935	7.37524e-114
LXN	MEMP	0.576642	0.0567899	0.683891	0.0640803	SIGLEC15+ mac	1.58439	2.74762	4.65129e-114
ITM2A	MEMP	0.69708	0.0945806	0.584867	0.10303	HSC/MPP	1.58428	2.27274	4.44164e-122
STRADB	MEMP	0.580292	0.0583472	0.398176	0.0656669	SIGLEC15+ mac	1.58023	2.72316	1.02956e-113
FCER1A	MEMP	0.434307	0.0213351	0.235294	0.0271266	cDC2	1.56665	3.60724	5.29145e-112
ZBTB16	MEMP	0.507299	0.0396076	0.260471	0.0461664	early T	1.5602	3.0755	9.46434e-110
FAM216A	MEMP	0.594891	0.0661337	0.351738	0.073549	HSC/MPP	1.55255	2.6098	4.4828e-111
PCLAF	MEMP	0.689781	0.0971242	0.537012	0.105436	tissue-repair mac cycling	1.55177	2.24966	1.41886e-117
RNF24	MEMP	0.624088	0.0761005	0.247813	0.0837854	NMP	1.54742	2.4795	4.84916e-112
GCSH	MEMP	0.525547	0.0459925	0.157434	0.0527178	NMP	1.54658	2.9428	3.06015e-108
SMIM1	MEMP	0.558394	0.0559074	0.298578	0.0629542	mast	1.54415	2.76535	1.1536e-108
RCC1	MEMP	0.755474	0.120691	0.314939	0.129594	tissue-repair mac cycling	1.5437	2.04335	8.30668e-124
CDK6	MEMP	0.864964	0.158119	0.595092	0.168032	HSC/MPP	1.54275	1.7836	2.12498e-141
C11orf1	MEMP	0.631387	0.0796823	0.386503	0.0874194	HSC/MPP	1.53871	2.43704	1.72343e-111
ATP6V0A2	MEMP	0.627737	0.0794228	0.597156	0.0871123	mast	1.53203	2.44056	1.78563e-110
MEG3	MEMP	0.452555	0.0280316	0.42654	0.0339851	mast	1.53047	3.38183	9.6468e-107
SPN	MEMP	0.781022	0.131956	0.539359	0.141058	NMP	1.52969	1.95858	1.45475e-125
IGF2BP1	MEMP	0.667883	0.0952035	0.380368	0.103235	HSC/MPP	1.5166	2.27075	1.40559e-111
HYAL3	MEMP	0.408759	0.0193106	0.241706	0.0247722	mast	1.5116	3.69803	3.02101e-106
CNRIP1	MEMP	0.868613	0.166113	0.638298	0.175965	SIGLEC15+ mac	1.50919	1.73747	3.67886e-138
ZNF521	MEMP	0.346715	0.00830565	0.137441	0.0130515	mast	1.50435	4.33885	4.81736e-111
MAP7	MEMP	0.412409	0.020816	0.116564	0.0263077	HSC/MPP	1.5003	3.63789	1.37587e-104
UNG	MEMP	0.587591	0.070598	0.247444	0.0778483	HSC/MPP	1.50012	2.55299	1.46947e-104
DTD1	MEMP	0.616788	0.0807724	0.185841	0.0882895	mega	1.49703	2.42713	1.05791e-105
TYMS	MEMP	0.740876	0.125934	0.678331	0.134558	tissue-repair mac cycling	1.48602	2.00576	2.7351e-115
CLEC11A	MEMP	0.791971	0.144363	0.813411	0.153445	NMP	1.48448	1.87442	6.86076e-122
PVT1	MEMP	0.405109	0.0202969	0.100304	0.0256935	SIGLEC15+ mac	1.48332	3.66152	7.91208e-103
KCNN4	MEMP	0.434307	0.0272529	0.212766	0.0329614	SIGLEC15+ mac	1.48204	3.41242	2.6848e-101
PDZD8	MEMP	0.554745	0.0626557	0.154867	0.0695568	mega	1.47873	2.66561	8.2854e-101
BEX2	MEMP	0.445255	0.030679	0.323108	0.036493	HSC/MPP	1.47408	3.31064	5.77187e-100
CYYR1	MEMP	0.379562	0.0160922	0.343558	0.0211895	HSC/MPP	1.46293	3.85425	6.03902e-102
MLLT3	MEMP	0.5	0.047446	0.280164	0.0537926	HSC/MPP	1.46131	2.92262	8.22601e-98
BZW2	MEMP	0.879562	0.180181	0.617021	0.189989	SIGLEC15+ mac	1.46077	1.66079	9.22697e-135
TSC22D1	MEMP	0.80292	0.154277	0.525562	0.163374	HSC/MPP	1.45466	1.81171	4.53709e-120
DLK1	MEMP	0.419708	0.0261109	0.384956	0.0316307	mega	1.44952	3.45363	7.7402e-98
NREP	MEMP	0.832117	0.166113	0.740286	0.175453	HSC/MPP	1.4482	1.74038	4.30251e-124
NME1	MEMP	0.759124	0.140469	0.374233	0.149145	HSC/MPP	1.44449	1.90283	9.51896e-113
ZNF667-AS1	MEMP	0.481752	0.0438123	0.284254	0.0499539	HSC/MPP	1.44364	2.99665	1.03237e-95
C5orf30	MEMP	0.427007	0.0284468	0.163717	0.0340362	mega	1.44343	3.38033	8.56223e-97
ALDH1A1	MEMP	0.40146	0.0221657	0.312796	0.0274849	mast	1.44289	3.59412	6.57238e-98
FMC1	MEMP	0.755474	0.140106	0.513678	0.148736	SIGLEC15+ mac	1.43962	1.90558	9.99482e-112
PPBP	mega	0.929204	0.00533347	0.0547445	0.0160201	MEMP	3.84125	4.13391	0
PF4	mega	0.893805	0.00372825	0.0948905	0.014024	MEMP	3.81386	4.26699	0
TUBB1	mega	0.79646	0.00150166	0.040146	0.0106971	MEMP	3.61416	4.53778	0
MPIG6B	mega	0.836283	0.0111848	0.434307	0.0207288	MEMP	3.24163	3.87623	3.4151e-295
ITGA2B	mega	0.809735	0.00947597	0.441606	0.0187327	MEMP	3.22071	3.97748	1.54688e-290
CMTM5	mega	0.690265	0.00289975	0.167883	0.0108507	MEMP	3.12244	4.52353	5.49675e-279
TMEM40	mega	0.632743	0.000621375	0.0218978	0.00793326	MEMP	3.06038	4.83669	3.60534e-282
CLEC1B	mega	0.650442	0.00243372	0.127737	0.00992937	MEMP	3.00001	4.61226	7.47534e-264
GP9	mega	0.893805	0.0260978	0.313869	0.0361347	MEMP	2.96788	3.3205	5.07687e-270
CAVIN2	mega	0.800885	0.0207125	0.616788	0.0297369	MEMP	2.8154	3.51537	1.63797e-239
TREML1	mega	0.59292	0.00212303	0.0291971	0.0089569	MEMP	2.79582	4.71533	1.36908e-238
PF4V1	mega	0.553097	0.00176056	0.0058309	0.00813799	NMP	2.66107	4.81121	2.07059e-223
NRGN	mega	0.880531	0.0458782	0.262774	0.0555328	MEMP	2.54542	2.89078	6.35998e-221
C19orf33	mega	0.59292	0.00869925	0.0371064	0.0154571	mono	2.47229	4.16969	1.80126e-190
CLU	mega	0.765487	0.0324669	0.412322	0.0409458	mast	2.44612	3.1955	2.11401e-194
MYL9	mega	0.769912	0.0357809	0.171629	0.0442727	microglia-like mac	2.40011	3.11739	6.56178e-190
ESAM	mega	0.544248	0.00999379	0.186131	0.0161736	MEMP	2.24468	4.12437	8.90425e-164
GP1BA	mega	0.49115	0.00486744	0.124088	0.0104924	MEMP	2.23822	4.55711	8.84785e-167
ITGB3	mega	0.455752	0.0024855	0.0620438	0.00772853	MEMP	2.21625	4.86284	2.92047e-169
PRKAR2B	mega	0.70354	0.0351595	0.580292	0.0428908	MEMP	2.21552	3.1491	2.67838e-164
LTBP1	mega	0.49115	0.00574772	0.215328	0.0113625	MEMP	2.1991	4.47744	1.59202e-161
C2orf88	mega	0.513274	0.00812966	0.419708	0.0139728	MEMP	2.19201	4.27064	7.52219e-159
SELP	mega	0.446903	0.00269263	0.116788	0.00783089	MEMP	2.16733	4.84968	2.10181e-163
RAB27B	mega	0.495575	0.00797432	0.260664	0.0136145	mast	2.1293	4.29662	3.94758e-152
ALOX12	mega	0.482301	0.00714582	0.215328	0.012642	MEMP	2.10801	4.37073	1.91426e-150
DMTN	mega	0.420354	0.00310688	0.0437956	0.00793326	MEMP	2.03312	4.83669	3.86307e-148
GNG11	mega	0.853982	0.0850766	0.568507	0.0939707	HSC/MPP	2.01947	2.36477	1.52158e-161
LGALSL	mega	0.415929	0.00429785	0.0334347	0.00905927	SIGLEC15+ mac	1.95652	4.70397	6.86181e-138
GRAP2	mega	0.548673	0.0226284	0.436019	0.0287133	mast	1.948	3.5504	7.29769e-130
MYLK	mega	0.469027	0.0112365	0.167173	0.0165319	SIGLEC15+ mac	1.92416	4.10246	5.86332e-129
SH3BGRL2	mega	0.376106	0.00372825	0.113139	0.00803562	MEMP	1.81429	4.82387	1.26268e-124
GFI1B	mega	0.446903	0.01279	0.510949	0.0178114	MEMP	1.80009	4.02791	6.98161e-116
LAT	mega	0.650442	0.0634838	0.556231	0.0702733	SIGLEC15+ mac	1.72716	2.65536	1.27693e-110
GATA1	mega	0.442478	0.015379	0.770073	0.0203194	MEMP	1.72397	3.89618	1.1771e-107
PDLIM1	mega	0.792035	0.106669	0.824818	0.114597	MEMP	1.71581	2.16633	2.60736e-122
SPX	mega	0.318584	0.00124275	0.0656934	0.0049135	MEMP	1.69352	5.31577	2.16842e-120
NEXN	mega	0.393805	0.00942419	0.0875912	0.0138704	MEMP	1.6847	4.278	2.73829e-106
PDE5A	mega	0.327434	0.00217481	0.0218978	0.00593715	MEMP	1.6786	5.12653	3.10573e-115
GP6	mega	0.300885	0.000466031	0.0218978	0.00394104	MEMP	1.66579	5.53631	3.8293e-123
SPARC	mega	0.646018	0.0692316	0.674772	0.0759034	SIGLEC15+ mac	1.66562	2.57829	2.56605e-104
SMIM5	mega	0.331858	0.00321044	0.180556	0.00701198	pDC prec	1.64606	4.96014	1.64893e-109
HBG2	mega	0.460177	0.0239747	0.127737	0.0290204	MEMP	1.62891	3.53976	6.51802e-97
RBPMS2	mega	0.331858	0.00378003	0.160584	0.00757498	MEMP	1.62043	4.8829	4.94396e-106
AP001189.1	mega	0.29646	0.000880282	0.0437956	0.00429931	MEMP	1.6155	5.4493	6.01804e-115
TUBA4A	mega	0.761062	0.113815	0.35468	0.121302	pro-B	1.60544	2.10947	6.06583e-108
TGFB1I1	mega	0.384956	0.0116508	0.208029	0.0159689	MEMP	1.59261	4.13711	1.63882e-96
MFSD2B	mega	0.340708	0.00548882	0.248175	0.00936636	MEMP	1.59132	4.67063	6.84388e-101
GUCY1B1	mega	0.438053	0.0232498	0.259124	0.0280479	MEMP	1.56553	3.57384	6.19468e-91
CALD1	mega	0.40708	0.0171396	0.0620438	0.0216501	MEMP	1.56023	3.83274	1.28315e-91
PBX1	mega	0.384956	0.0144988	0.324818	0.0187839	MEMP	1.5301	3.97475	1.10451e-89
PTGS1	mega	0.646018	0.0871997	0.423358	0.0936636	MEMP	1.5298	2.36805	4.12968e-91
DNM3	mega	0.309735	0.00393538	0.0875912	0.00747262	MEMP	1.51662	4.89651	3.03927e-96
CCL5	mega	0.79646	0.142554	0.82638	0.150118	NK	1.51036	1.89634	6.82871e-103
LINC00989	mega	0.261062	0.000207125	0.0109489	0.00322449	MEMP	1.49771	5.73698	5.98817e-110
KALRN	mega	0.292035	0.00289975	0.0839416	0.00624424	MEMP	1.4824	5.0761	3.85966e-95
CTTN	mega	0.314159	0.00564416	0.109422	0.00921282	SIGLEC15+ mac	1.47251	4.68716	5.19254e-90
GMPR	mega	0.424779	0.0274959	0.572993	0.0320913	MEMP	1.46089	3.43917	1.40315e-80
MMRN1	mega	0.402655	0.023198	0.288321	0.0275873	MEMP	1.44569	3.5904	7.83842e-80
MTURN	mega	0.393805	0.0235087	0.229927	0.027792	MEMP	1.41101	3.58301	1.15524e-76
TRIM58	mega	0.349558	0.0138256	0.291971	0.0177091	MEMP	1.41	4.03368	3.29368e-79
FHL1	mega	0.371681	0.0195215	0.140887	0.023595	pro-B	1.39259	3.74672	6.62197e-76
FAXDC2	mega	0.376106	0.0205572	0.0668693	0.0246699	SIGLEC15+ mac	1.39241	3.70217	1.20395e-75
CA2	mega	0.530973	0.0684031	0.601824	0.0737537	SIGLEC15+ mac	1.38426	2.60702	1.05321e-72
THBS1	mega	0.654867	0.122566	0.56072	0.128724	mono	1.34254	2.05009	5.90378e-74
VCL	mega	0.69469	0.138618	0.375912	0.145051	MEMP	1.34122	1.93067	1.18878e-76
DLK1	mega	0.384956	0.0274959	0.419708	0.0316307	MEMP	1.32949	3.45363	7.57239e-69
LY6G6F	mega	0.225664	0.000258906	0.0145985	0.00286621	MEMP	1.32121	5.85476	7.91452e-93
AC090409.1	mega	0.230088	0.000569594	0.0328467	0.00322449	MEMP	1.32001	5.73698	9.74648e-90
SYTL4	mega	0.256637	0.00310688	0.127737	0.00603951	MEMP	1.31127	5.10943	1.07188e-79
PKHD1L1	mega	0.225664	0.00041425	0.00731261	0.00301976	B cell	1.30943	5.80258	4.15457e-90
RGS18	mega	0.663717	0.133906	0.470803	0.140035	MEMP	1.30478	1.96586	4.65379e-71
HBD	mega	0.300885	0.00978666	0.569343	0.0131539	MEMP	1.30314	4.33104	4.1352e-72
F2R	mega	0.411504	0.0380075	0.404255	0.0423278	SIGLEC15+ mac	1.30131	3.16231	3.71231e-65
ACRBP	mega	0.504425	0.0709921	0.189781	0.0760057	MEMP	1.29988	2.57695	2.25183e-64
PTCRA	mega	0.283186	0.00709403	0.638889	0.0102876	pDC prec	1.29609	4.57681	2.00512e-73
CDKN2D	mega	0.637168	0.125932	0.425819	0.131846	pre-B	1.29098	2.02612	3.78741e-68
MFAP3L	mega	0.256637	0.00378003	0.0656934	0.00670488	MEMP	1.28445	5.00492	3.0363e-76
TUBA8	mega	0.274336	0.00678335	0.212766	0.00987819	SIGLEC15+ mac	1.26673	4.61743	2.8439e-71
MAP3K7CL	mega	0.292035	0.0100973	0.0510949	0.0133586	MEMP	1.26031	4.3156	2.16556e-68
AQP10	mega	0.216814	0.000569594	0.0145985	0.00307094	MEMP	1.25444	5.78577	7.10742e-84
TPM1	mega	0.659292	0.144522	0.521898	0.150476	MEMP	1.24867	1.89395	1.25647e-65
SNCA	mega	0.685841	0.156121	0.70073	0.162248	MEMP	1.24729	1.81863	2.37748e-67
ACTN1	mega	0.561947	0.105375	0.495627	0.110656	NMP	1.23703	2.20133	7.09025e-60
CD9	mega	0.628319	0.133958	0.723404	0.139677	SIGLEC15+ mac	1.2368	1.96843	1.01313e-62
MEIS1	mega	0.331858	0.0220588	0.273723	0.0256423	MEMP	1.21577	3.66351	2.21271e-60
ELOVL7	mega	0.230088	0.00253728	0.0620438	0.00516941	MEMP	1.21142	5.265	1.72849e-72
AL731557.1	mega	0.243363	0.00429785	0.218009	0.00706316	mast	1.20534	4.95286	6.09978e-69
RIPOR3	mega	0.238938	0.00450497	0.259124	0.00721671	MEMP	1.17829	4.93136	1.74337e-66
ZNF185	mega	0.252212	0.00667978	0.0145985	0.00951991	MEMP	1.17389	4.65437	7.48247e-64
GJA4	mega	0.225664	0.00295153	0.138686	0.00552769	MEMP	1.173	5.19799	1.79032e-68
RAB37	mega	0.486726	0.0885978	0.554745	0.093203	MEMP	1.15499	2.37298	6.43278e-51
PPP1R14A	mega	0.49115	0.0910833	0.630713	0.0957109	B cell	1.15245	2.34642	9.76072e-51
MPL	mega	0.243363	0.00621375	0.248175	0.0089569	MEMP	1.14754	4.71533	3.44373e-62
NFE2	mega	0.473451	0.0858016	0.90146	0.0902856	MEMP	1.13855	2.40478	2.30504e-49
AC147651.1	mega	0.225664	0.0038836	0.0157618	0.00644897	microglia-like mac	1.13821	5.04383	3.96813e-64
RHAG	mega	0.234513	0.00522991	0.29562	0.00788208	MEMP	1.13579	4.84316	3.00499e-62
HBQ1	mega	0.230088	0.004971	0.167883	0.00757498	MEMP	1.1235	4.8829	1.42893e-61
HGD	mega	0.190265	0.000569594	0.0328467	0.00276384	MEMP	1.12088	5.89113	2.54609e-72
P2RX1	mega	0.49115	0.100715	0.518248	0.105231	MEMP	1.10587	2.2516	1.31205e-46
TIMP3	mega	0.371681	0.0475352	0.817518	0.0512847	MEMP	1.10403	2.97036	1.14363e-47
HDC	mast	0.848341	0.00372536	0.244526	0.0128468	MEMP	3.69424	4.35466	0
CPA3	mast	0.890995	0.00946862	0.423358	0.0189886	MEMP	3.53183	3.96391	9.69746e-315
RHEX	mast	0.85782	0.0135562	0.375	0.0226738	pDC prec	3.24818	3.78655	1.05467e-276
GATA2	mast	0.919431	0.0214208	0.835766	0.0311188	MEMP	3.19037	3.46994	3.05654e-279
SLC18A2	mast	0.696682	0.00527759	0.164234	0.0127444	MEMP	3.03939	4.36266	1.68486e-244
TPSAB1	mast	0.592417	0.00186268	0.0729927	0.00824035	MEMP	2.84284	4.79871	2.25389e-227
TPSB2	mast	0.587678	0.00160397	0.0729927	0.00793326	MEMP	2.84242	4.83669	2.13684e-228
BACE2	mast	0.635071	0.00879598	0.175182	0.0155594	MEMP	2.64386	4.16309	8.22288e-196
IL1RL1	mast	0.625592	0.00827857	0.113139	0.0149452	MEMP	2.62959	4.20336	2.25798e-194
PRG2	mast	0.57346	0.00429451	0.222628	0.0104412	MEMP	2.61612	4.562	1.2432e-195
CLC	mast	0.559242	0.00408755	0.128571	0.0100829	neutro	2.57079	4.59691	5.53762e-191
IL5RA	mast	0.526066	0.0028975	0.145985	0.00854745	MEMP	2.50519	4.76212	3.33005e-186
AL157895.1	mast	0.587678	0.00858902	0.430657	0.0148429	MEMP	2.47426	4.21024	5.75497e-177
TPSD1	mast	0.492891	0.00139701	0.0474453	0.00670488	MEMP	2.46688	5.00492	2.07761e-187
SLC45A3	mast	0.592417	0.0103482	0.145897	0.0166343	SIGLEC15+ mac	2.42671	4.09629	2.35089e-171
MS4A2	mast	0.398104	0.000879598	0.0255474	0.00516941	MEMP	2.09602	5.265	4.16228e-152
MS4A3	mast	0.620853	0.0316138	0.784257	0.0379773	NMP	2.03067	3.27077	3.07588e-130
HPGD	mast	0.578199	0.0240079	0.346715	0.0299928	MEMP	2.02763	3.5068	7.48731e-129
SVOPL	mast	0.464455	0.0120557	0.481752	0.0169413	MEMP	1.89405	4.078	1.42955e-116
MEIS2	mast	0.417062	0.0066746	0.233577	0.0111066	MEMP	1.87687	4.50022	8.42767e-118
SLC24A3	mast	0.412322	0.00626067	0.222628	0.0106459	MEMP	1.87301	4.54258	8.42767e-118
GCSAML	mast	0.383886	0.00719201	0.262774	0.0112601	MEMP	1.7223	4.48649	2.25646e-103
TESPA1	mast	0.526066	0.0327004	0.744526	0.0380285	MEMP	1.71993	3.26942	3.53702e-98
KIT	mast	0.50237	0.0298546	0.416058	0.0349575	MEMP	1.68476	3.35362	8.57727e-95
AL662860.1	mast	0.293839	0.00046567	0.0328467	0.00363394	MEMP	1.65062	5.61744	5.37538e-113
GRAP2	mast	0.436019	0.0242666	0.548673	0.0287133	mega	1.54804	3.5504	1.16967e-82
EPX	mast	0.279621	0.00160397	0.0985401	0.00460641	MEMP	1.50445	5.38031	1.38625e-93
STXBP5	mast	0.473934	0.037564	0.576642	0.0422766	MEMP	1.4993	3.16352	1.91026e-77
VWA5A	mast	0.450237	0.0323899	0.203647	0.0369024	SIGLEC15+ mac	1.48555	3.29948	1.87219e-76
CD82	mast	0.64455	0.0953588	0.759124	0.10129	MEMP	1.47587	2.28977	1.12409e-79
TIMP3	mast	0.492891	0.0464635	0.817518	0.0512847	MEMP	1.46407	2.97036	3.47066e-74
ATP6V0A2	mast	0.597156	0.081544	0.627737	0.0871123	MEMP	1.45739	2.44056	8.29275e-76
CDK15	mast	0.251185	0.000413929	0.0291971	0.00312212	MEMP	1.44915	5.76924	1.55988e-95
MEG3	mast	0.42654	0.0296994	0.452555	0.0339851	MEMP	1.44249	3.38183	5.99063e-73
LINC01140	mast	0.270142	0.00320795	0.116788	0.0060907	MEMP	1.37799	5.10099	5.27499e-79
LAT	mast	0.507109	0.0655042	0.650442	0.0702733	mega	1.34656	2.65536	9.32928e-64
REXO5	mast	0.36019	0.0211621	0.211679	0.0248234	MEMP	1.33125	3.69597	4.48305e-65
PRSS57	mast	0.492891	0.0635381	0.952555	0.0681748	MEMP	1.32375	2.68568	1.23317e-61
CLU	mast	0.412322	0.0368914	0.765487	0.0409458	mega	1.31758	3.1955	8.56789e-62
LIF	mast	0.28436	0.0107104	0.0547112	0.0136657	SIGLEC15+ mac	1.22072	4.29287	4.77904e-60
GATA1	mast	0.312796	0.0171263	0.770073	0.0203194	MEMP	1.21871	3.89618	2.11009e-57
ALOX5	mast	0.654028	0.149946	0.376687	0.155389	mono	1.21768	1.86182	6.69908e-58
AC084033.3	mast	0.616114	0.13344	0.963504	0.138653	MEMP	1.21731	1.97578	7.159e-56
PLPP1	mast	0.440758	0.0622963	0.404255	0.0663835	SIGLEC15+ mac	1.19547	2.71231	1.50115e-50
ADAM8	mast	0.50237	0.0903399	0.249252	0.0947896	cDC2	1.18363	2.3561	1.09448e-49
ALS2	mast	0.35545	0.0323382	0.226277	0.0358276	MEMP	1.18331	3.32904	1.15793e-51
ARHGEF6	mast	0.654028	0.16464	0.343066	0.169925	MEMP	1.1592	1.7724	5.04269e-53
AHNAK	mast	0.672986	0.174937	0.696049	0.180315	SIGLEC15+ mac	1.15286	1.71305	1.2108e-53
CAVIN2	mast	0.327014	0.0264914	0.800885	0.0297369	mega	1.14957	3.51537	4.62506e-50
KRT1	mast	0.199052	0.000983081	0.0218978	0.00312212	MEMP	1.14838	5.76924	6.45442e-67
ALDH1A1	mast	0.312796	0.0243701	0.40146	0.0274849	MEMP	1.12423	3.59412	1.26069e-48
RAB27B	mast	0.260664	0.0109174	0.495575	0.0136145	mega	1.11997	4.29662	1.53286e-52
AL731557.1	mast	0.218009	0.00476018	0.243363	0.00706316	mega	1.07977	4.95286	5.14418e-54
ADCYAP1	mast	0.170616	0.000206964	0.00364964	0.00204729	MEMP	1.05632	6.19124	4.48305e-65
NFE2	mast	0.436019	0.0865111	0.90146	0.0902856	MEMP	1.04853	2.40478	2.63648e-38
FERMT2	mast	0.232227	0.00858902	0.0353982	0.0110042	mega	1.04722	4.50948	1.1875e-48
CNRIP1	mast	0.601896	0.171315	0.868613	0.175965	MEMP	1.04578	1.73747	3.26451e-41
NMT2	mast	0.298578	0.0272676	0.215328	0.0301976	MEMP	1.04502	3.49999	2.16447e-42
STX3	mast	0.379147	0.0640555	0.147301	0.0674583	mono	1.02227	2.69625	5.37051e-37
CSF2RB	mast	0.469194	0.11026	0.434307	0.114137	MEMP	1.01832	2.17036	6.87831e-36
MIR4435-2HG	mast	0.611374	0.185595	0.635036	0.190193	MEMP	1.01471	1.65971	3.6638e-39
P2RX1	mast	0.450237	0.101464	0.518248	0.105231	MEMP	1.01375	2.2516	1.79988e-35
MYB	mast	0.383886	0.0711957	0.759124	0.0745726	MEMP	0.996562	2.59598	8.77721e-35
PLAT	mast	0.203791	0.00548456	0.0245184	0.00762616	microglia-like mac	0.993722	4.87617	3.10952e-47
PIK3R6	mast	0.36019	0.060744	0.124088	0.0639779	MEMP	0.99024	2.74922	7.09904e-35
PTGS1	mast	0.417062	0.090133	0.646018	0.0936636	mega	0.987621	2.36805	1.45789e-33
LMO4	mast	0.64455	0.211983	0.583942	0.216655	MEMP	0.985807	1.52945	1.59363e-38
LTC4S	mast	0.668246	0.224349	0.600701	0.229143	microglia-like mac	0.9846	1.47341	9.7387e-40
ACSL4	mast	0.49763	0.13582	0.358663	0.139728	SIGLEC15+ mac	0.979366	1.96806	3.80797e-33
RPS6KA5	mast	0.379147	0.0738345	0.153285	0.0771317	MEMP	0.971466	2.56224	6.8736e-33
GAPT	mast	0.469194	0.122523	0.334995	0.126267	cDC2	0.970931	2.06936	3.21053e-32
TMEM154	mast	0.374408	0.0722306	0.257871	0.0754939	mono	0.967358	2.5837	1.13499e-32
PTPN7	mast	0.50237	0.141926	0.638686	0.145818	MEMP	0.967259	1.92539	2.65049e-32
ADGRE2	mast	0.35545	0.0628654	0.155172	0.0660252	mono	0.966014	2.71772	4.60249e-33
PTGDR2	mast	0.194313	0.0049154	0.0693431	0.00696079	MEMP	0.965241	4.96746	8.33902e-46
TNFSF10	mast	0.507109	0.145962	0.388732	0.149862	ifn-induced mac	0.962514	1.89804	5.09085e-32
LEO1	mast	0.42654	0.101361	0.372263	0.104873	MEMP	0.961852	2.25501	1.69997e-31
IL13	mast	0.161137	0.000827857	0.0218978	0.00255912	MEMP	0.961683	5.96809	2.10057e-53
DLC1	mast	0.270142	0.026388	0.50365	0.0290204	MEMP	0.956238	3.53976	1.50352e-36
GALC	mast	0.42654	0.10431	0.244526	0.10779	MEMP	0.950149	2.22757	1.36283e-30
NTRK1	mast	0.184834	0.00408755	0.135036	0.00603951	MEMP	0.944397	5.10943	2.92885e-45
STAP1	mast	0.317536	0.0483779	0.329243	0.0512847	HSC/MPP	0.943196	2.97036	1.16473e-32
CTSG	mast	0.246445	0.0193512	0.685131	0.0218037	NMP	0.942821	3.82568	2.66131e-37
HS6ST1	mast	0.2891	0.0360635	0.142336	0.0387962	MEMP	0.93941	3.24943	8.04018e-34
MCTP2	mast	0.345972	0.0636933	0.347241	0.0667417	NK	0.936519	2.70692	5.36116e-31
DENND1B	mast	0.35545	0.0692296	0.240876	0.0723206	MEMP	0.933642	2.62665	1.75593e-30
RAB37	mast	0.393365	0.089926	0.554745	0.093203	MEMP	0.933445	2.37298	1.2287e-29
AC020571.1	mast	0.165877	0.0020179	0.0353982	0.00378749	mega	0.924937	5.57605	4.05361e-47
ATP2A3	mast	0.393365	0.094117	0.50365	0.0973488	MEMP	0.916326	2.32946	2.6818e-28
VAT1	mast	0.559242	0.190873	0.641337	0.194851	SIGLEC15+ mac	0.914651	1.63552	1.19128e-29
DUSP10	mast	0.402844	0.101257	0.29562	0.104514	MEMP	0.909795	2.25843	1.14053e-27
PPM1H	mast	0.199052	0.0086925	0.208029	0.0107483	MEMP	0.902305	4.53301	8.95693e-39
SIGLEC10	mast	0.364929	0.082734	0.30648	0.0857816	microglia-like mac	0.896248	2.45595	2.8202e-27
HYAL3	mast	0.241706	0.0224039	0.408759	0.0247722	MEMP	0.893837	3.69803	2.24449e-33
NDFIP2	mast	0.236967	0.0211621	0.158055	0.0234927	SIGLEC15+ mac	0.888878	3.75107	2.2972e-33
HPGDS	mast	0.78673	0.318052	0.625841	0.323114	tissue-repair mac cycling	0.888808	1.12975	2.71934e-41
IL4	mast	0.156398	0.0017592	0.0170157	0.00342921	early T	0.887626	5.67542	4.33484e-45
CAPG	mast	0.772512	0.312723	0.835866	0.317689	SIGLEC15+ mac	0.885827	1.14668	1.00283e-39
TMEM173	mast	0.516588	0.176334	0.69708	0.180008	MEMP	0.88582	1.71475	1.88847e-26
RHOBTB3	mast	0.421801	0.119625	0.470803	0.122889	MEMP	0.884296	2.09648	1.38701e-25
KLRB1	early T	0.841623	0.0510827	0.943472	0.112908	NK	1.83573	2.18118	0
GZMA	early T	0.787958	0.0425319	0.916555	0.100829	NK	1.80783	2.29433	0
CD3E	early T	0.804974	0.047196	0.71467	0.106459	NK	1.80314	2.23999	0
GZMK	early T	0.748037	0.0343698	0.711978	0.0901832	NK	1.79971	2.40591	0
IL32	early T	0.842277	0.0616324	0.502019	0.122684	NK	1.76722	2.09814	0
GZMM	early T	0.738874	0.0375347	0.833109	0.0923841	NK	1.75985	2.3818	0
SPOCK2	early T	0.706806	0.0306496	0.448183	0.0835295	NK	1.75469	2.48256	0
TRBC2	early T	0.760471	0.0501943	0.605653	0.105743	NK	1.70859	2.24675	0
CD3D	early T	0.665576	0.0283731	0.433378	0.0782066	NK	1.69615	2.5484	0
CD96	early T	0.662958	0.0362576	0.515478	0.0852697	NK	1.63216	2.46194	0
TRBC1	early T	0.661649	0.0374237	0.725437	0.0862422	NK	1.62143	2.4506	0
CD247	early T	0.639398	0.0363687	0.740242	0.0835295	NK	1.58734	2.48256	0
SKAP1	early T	0.608639	0.0299278	0.519515	0.0751868	NK	1.57502	2.58778	0
SH2D2A	early T	0.637435	0.041477	0.666218	0.0880848	NK	1.54862	2.42946	0
LCK	early T	0.617147	0.0360355	0.51817	0.0814822	NK	1.54741	2.50737	0
CST7	early T	0.712696	0.0667962	0.919246	0.11731	NK	1.52726	2.14294	0
SH2D1A	early T	0.518979	0.0207662	0.45895	0.0597298	NK	1.46244	2.81792	0
TC2N	early T	0.501963	0.0174903	0.292059	0.0553793	NK	1.45246	2.89355	0
TMIGD2	early T	0.603403	0.0515269	0.462988	0.0946873	NK	1.42233	2.35718	0
NCR3	early T	0.500654	0.0227651	0.39031	0.0601392	NK	1.40739	2.81109	0
IL2RB	early T	0.526178	0.0325375	0.726783	0.0711434	NK	1.39072	2.64306	0
PRF1	early T	0.526832	0.0337035	0.726783	0.0722694	NK	1.38418	2.62735	0
IFITM1	early T	0.939136	0.169739	0.97712	0.229911	NK	1.38059	1.47006	0
ETS1	early T	0.643979	0.0739034	0.604307	0.118487	NK	1.37358	2.13295	0
IFNG	early T	0.472513	0.0196557	0.442799	0.0550722	NK	1.36987	2.89911	0
TRAC	early T	0.424738	0.012271	0.153432	0.0445286	NK	1.32163	3.11162	0
TRDC	early T	0.480366	0.0305941	0.526245	0.0657693	NK	1.30737	2.7216	0
LINC00861	early T	0.425393	0.0176569	0.38358	0.0495445	NK	1.27826	3.00488	0
SAMD3	early T	0.451571	0.0294836	0.58681	0.0624936	NK	1.25207	2.77269	0
LBH	early T	0.582461	0.0771238	0.531629	0.116644	NK	1.25149	2.14862	0
TENT5C	early T	0.481675	0.0409217	0.41319	0.0753915	NK	1.24516	2.58506	0
ITM2A	early T	0.538613	0.0660744	0.69708	0.10303	MEMP	1.22412	2.27274	0
LINC01871	early T	0.391361	0.0143809	0.314939	0.0438632	NK	1.22366	3.12668	0
RORA	early T	0.39856	0.0184342	0.35397	0.0481626	NK	1.2089	3.03317	0
CD3G	early T	0.368455	0.0102165	0.135935	0.0382332	NK	1.20266	3.26405	0
CAMK4	early T	0.373691	0.0117712	0.112474	0.0400757	HSC/MPP	1.20216	3.21698	0
SEPT1	early T	0.568717	0.0880622	0.458333	0.125653	pDC prec	1.17965	2.07423	0
KLRC1	early T	0.429319	0.0332038	0.738896	0.0641826	NK	1.17892	2.74602	0
ZAP70	early T	0.394634	0.0235425	0.380888	0.0525642	NK	1.16248	2.94572	0
CTSW	early T	0.588351	0.100722	0.850606	0.138858	NK	1.16158	1.97431	0
FYN	early T	0.55301	0.0868406	0.537012	0.123298	NK	1.15753	2.09315	0
CLEC2B	early T	0.650524	0.128373	0.617766	0.169209	NK	1.15573	1.77662	0
CD69	early T	0.880236	0.2196	0.811575	0.271266	NK	1.1484	1.30465	0
CLIC3	early T	0.447644	0.0468629	0.815612	0.0782066	NK	1.14078	2.5484	0
CD7	early T	0.746073	0.178012	0.902778	0.222438	pDC prec	1.12143	1.50311	0
TXK	early T	0.364529	0.0199889	0.356662	0.0469342	NK	1.1151	3.05901	0
PDE4D	early T	0.572644	0.106885	0.46568	0.14331	NK	1.1125	1.94274	0
IL7R	early T	0.460079	0.0578012	0.511247	0.089262	HSC/MPP	1.11163	2.41618	0
TRGV9	early T	0.385471	0.0282621	0.292059	0.0561982	NK	1.10972	2.87887	0
LTB	early T	0.731675	0.178012	0.784722	0.221312	pDC prec	1.1035	1.50818	0
CCL5	early T	0.580497	0.113604	0.82638	0.150118	NK	1.10082	1.89634	0
STK17A	early T	0.789267	0.201999	0.822342	0.247927	NK	1.10073	1.39462	0
RARRES3	early T	0.828534	0.22221	0.807537	0.269628	NK	1.08597	1.31071	0
TRDV2	early T	0.278796	0.00111049	0.013459	0.0228273	NK	1.05379	3.7798	0
HOPX	early T	0.406414	0.0471405	0.604307	0.075238	NK	1.05143	2.5871	0
PTPRCAP	early T	0.575262	0.126319	0.672761	0.161429	B cell	1.0491	1.82369	0
XCL1	early T	0.356675	0.0271516	0.543742	0.0529225	NK	1.04824	2.93893	0
GZMB	early T	0.370419	0.0327596	0.708333	0.0591668	pDC prec	1.04732	2.8274	0
CD8A	early T	0.314791	0.012271	0.266487	0.03593	NK	1.04705	3.32618	0
PYHIN1	early T	0.346204	0.0243198	0.438762	0.0494933	NK	1.04066	3.00592	0
NKG7	early T	0.823298	0.238034	0.993271	0.283806	NK	1.03692	1.25946	0
CD27	early T	0.311518	0.0144919	0.146798	0.0377214	pro-B	1.02101	3.27753	0
ERN1	early T	0.590969	0.148584	0.618056	0.183181	pDC prec	1.00304	1.69728	2.83331e-304
TNFRSF18	early T	0.333115	0.0254858	0.216769	0.0495445	HSC/MPP	1.00097	3.00488	0
LAT	early T	0.375654	0.0443642	0.650442	0.0702733	mega	0.997499	2.65536	2.2251e-298
FKBP11	early T	0.392016	0.0530816	0.296097	0.0795885	NK	0.992147	2.53089	2.98113e-289
ACAP1	early T	0.543194	0.129595	0.537832	0.161941	HSC/MPP	0.988897	1.82052	5.87782e-284
IL23R	early T	0.265052	0.00566352	0.0874832	0.0259494	NK	0.967867	3.65161	0
GIMAP7	early T	0.521597	0.125652	0.496635	0.156618	NK	0.967013	1.85395	2.97236e-266
GATA3	early T	0.293194	0.0161577	0.242261	0.0378237	NK	0.960156	3.27482	3.56082e-317
DENND2D	early T	0.445681	0.0880622	0.496635	0.11603	NK	0.959953	2.1539	2.71297e-258
OXNAD1	early T	0.356675	0.0445308	0.20438	0.0689426	MEMP	0.953922	2.67448	4.81179e-272
CXCR6	early T	0.259162	0.00544142	0.123822	0.0252841	NK	0.95309	3.67758	0
ITK	early T	0.274869	0.0108273	0.172275	0.0314771	NK	0.950633	3.45849	0
PRKCH	early T	0.331806	0.0364797	0.433378	0.0595762	NK	0.935859	2.8205	3.77331e-269
PIM1	early T	0.50589	0.127984	0.675182	0.157539	MEMP	0.934926	1.84808	1.16227e-243
GBP5	early T	0.348168	0.044975	0.352113	0.0686867	ifn-induced mac	0.932462	2.6782	3.24714e-259
IKZF3	early T	0.299738	0.0230428	0.279946	0.0446822	NK	0.931641	3.10818	1.1779e-285
RHOH	early T	0.505236	0.129761	0.535787	0.159126	HSC/MPP	0.928653	1.83806	1.34972e-239
DUSP5	early T	0.535995	0.151694	0.611111	0.181748	pDC prec	0.913942	1.70513	1.1538e-234
MATK	early T	0.596859	0.18523	0.87234	0.217422	SIGLEC15+ mac	0.910754	1.52591	4.98683e-247
SLA2	early T	0.320681	0.037035	0.427995	0.0592179	NK	0.906414	2.82653	5.92173e-252
KLRD1	early T	0.306283	0.0305386	0.699865	0.0521036	NK	0.904919	2.95452	6.18968e-259
FCMR	early T	0.522906	0.155636	0.577697	0.184359	B cell	0.884167	1.69087	3.23942e-214
OCIAD2	early T	0.439791	0.111549	0.699387	0.13722	HSC/MPP	0.873499	1.98617	2.86827e-202
STAT4	early T	0.342277	0.0556913	0.351279	0.0781042	NK	0.872709	2.54971	4.05308e-218
KLRG1	early T	0.302356	0.0350916	0.29562	0.0559934	MEMP	0.871547	2.88252	4.2617e-235
PTPN22	early T	0.373691	0.0749584	0.519757	0.0983212	SIGLEC15+ mac	0.866782	2.31952	1.68329e-205
XCL2	early T	0.27945	0.0258745	0.504711	0.0457058	NK	0.862252	3.08553	1.13943e-242
CYTIP	early T	0.74411	0.282121	0.683891	0.318252	SIGLEC15+ mac	0.851941	1.14491	1.01787e-276
ZNRF1	early T	0.324607	0.0511938	0.346715	0.0725765	MEMP	0.851482	2.62311	9.12794e-210
IGFBP2	early T	0.309555	0.0430872	0.309038	0.0639267	NMP	0.851282	2.75002	3.29172e-216
TRAF1	early T	0.274215	0.0277624	0.138627	0.0470365	NK	0.838228	3.05683	3.73115e-227
AQP3	early T	0.230366	0.0092171	0.128834	0.0265124	HSC/MPP	0.836263	3.63014	2.55626e-270
PIM2	early T	0.459424	0.136813	0.416819	0.162043	B cell	0.836102	1.81989	1.50724e-179
SATB1	early T	0.39267	0.0980011	0.462168	0.121046	HSC/MPP	0.829156	2.11158	2.83121e-178
OPTN	early T	0.271597	0.0299833	0.30148	0.0488791	NK	0.819789	3.01841	1.54484e-214
TTC39C	early T	0.401832	0.108051	0.288344	0.131027	HSC/MPP	0.816666	2.03235	1.23422e-169
RASGRP1	early T	0.227094	0.0109939	0.129206	0.0278944	NK	0.812845	3.57933	3.09135e-251
ISG20	early T	0.45877	0.145863	0.513711	0.170335	B cell	0.812018	1.76999	2.12674e-165
GZMA	NK	0.916555	0.0685821	0.787958	0.100829	early T	2.10288	2.29433	0
CLIC3	NK	0.815612	0.0490556	0.694444	0.0782066	pDC prec	2.07851	2.5484	0
KLRD1	NK	0.699865	0.0264964	0.306283	0.0521036	early T	2.06777	2.95452	0
KLRB1	NK	0.943472	0.0800745	0.841623	0.112908	early T	2.05788	2.18118	0
KLRC1	NK	0.738896	0.03751	0.429319	0.0641826	early T	2.02903	2.74602	0
GZMM	NK	0.833109	0.0631019	0.738874	0.0923841	early T	1.9843	2.3818	0
CST7	NK	0.919246	0.0856079	0.712696	0.11731	early T	1.96989	2.14294	0
IL2RB	NK	0.726783	0.0452248	0.526178	0.0711434	early T	1.92093	2.64306	0
PRF1	NK	0.726783	0.0463953	0.526832	0.0722694	early T	1.90952	2.62735	0
CD247	NK	0.740242	0.0575685	0.639398	0.0835295	early T	1.83769	2.48256	0
TRBC1	NK	0.725437	0.0609737	0.661649	0.0862422	early T	1.77775	2.4506	0
GZMB	NK	0.608345	0.0374568	0.708333	0.0591668	pDC prec	1.72003	2.8274	0
GZMK	NK	0.711978	0.0656026	0.748037	0.0901832	early T	1.71296	2.40591	0
CTSW	NK	0.850606	0.110721	0.687117	0.138858	HSC/MPP	1.67936	1.97431	0
SH2D1B	NK	0.499327	0.0184624	0.215314	0.0367489	early T	1.6496	3.30365	0
SAMD3	NK	0.58681	0.0417664	0.451571	0.0624936	early T	1.62704	2.77269	0
SH2D2A	NK	0.666218	0.0652301	0.637435	0.0880848	early T	1.61855	2.42946	0
CD3E	NK	0.71467	0.0824155	0.804974	0.106459	early T	1.60086	2.23999	0
XCL1	NK	0.543742	0.0335196	0.356675	0.0529225	early T	1.59802	2.93893	0
CCL5	NK	0.82638	0.123384	0.79646	0.150118	mega	1.56709	1.89634	0
HOPX	NK	0.604307	0.054323	0.406414	0.075238	early T	1.5634	2.5871	0
XCL2	NK	0.504711	0.0275605	0.27945	0.0457058	early T	1.5573	3.08553	0
IFITM1	NK	0.97712	0.200372	0.939136	0.229911	early T	1.43643	1.47006	0
TRDC	NK	0.526245	0.0475658	0.480366	0.0657693	early T	1.43223	2.7216	1.13338e-272
TIGIT	NK	0.386272	0.014738	0.174084	0.0288668	early T	1.36936	3.54506	8.94999e-267
TRBC2	NK	0.605653	0.0859803	0.760471	0.105743	early T	1.36075	2.24675	5.97669e-254
SKAP1	NK	0.519515	0.0576217	0.608639	0.0751868	early T	1.34439	2.58778	2.58404e-241
GZMH	NK	0.379542	0.0162277	0.172775	0.030044	early T	1.33033	3.50509	2.90471e-252
PYHIN1	NK	0.438762	0.0341048	0.346204	0.0494933	early T	1.31888	3.00592	1.06815e-235
KLRC3	NK	0.371467	0.0166002	0.14267	0.0300952	early T	1.30139	3.50339	1.09991e-242
LCK	NK	0.51817	0.0642192	0.617147	0.0814822	early T	1.29924	2.50737	1.08028e-225
SH2D1A	NK	0.45895	0.0439479	0.518979	0.0597298	early T	1.29329	2.81792	1.37447e-224
CD7	NK	0.858681	0.197287	0.902778	0.222438	pDC prec	1.29069	1.50311	7.24512e-311
ETS1	NK	0.604307	0.0992817	0.643979	0.118487	early T	1.28896	2.13295	7.81402e-230
IFNG	NK	0.442799	0.0397446	0.472513	0.0550722	early T	1.28372	2.89911	1.90322e-222
CD96	NK	0.515478	0.0682628	0.662958	0.0852697	early T	1.26907	2.46194	2.21125e-215
NKG7	NK	0.993271	0.25576	0.823298	0.283806	early T	1.25099	1.25946	0
PRKCH	NK	0.433378	0.0447991	0.331806	0.0595762	early T	1.22234	2.8205	1.62873e-201
SLA2	NK	0.427995	0.0446395	0.375	0.0592179	pDC prec	1.20974	2.82653	1.30664e-197
EOMES	NK	0.341857	0.0199521	0.232984	0.0321937	early T	1.17462	3.43599	1.18242e-200
GNLY	NK	0.310902	0.0126097	0.0490838	0.0239533	early T	1.16018	3.73165	4.56595e-206
LINC00861	NK	0.38358	0.0363395	0.425393	0.0495445	early T	1.15261	3.00488	3.6125e-183
NCR1	NK	0.320323	0.0161745	0.182592	0.0277408	early T	1.14831	3.58485	2.18383e-197
STK17A	NK	0.822342	0.225219	0.789267	0.247927	early T	1.14685	1.39462	4.33563e-246
LBH	NK	0.531629	0.100239	0.582461	0.116644	early T	1.14227	2.14862	7.1546e-175
FYN	NK	0.537012	0.106943	0.55301	0.123298	early T	1.12405	2.09315	1.4943e-169
ZAP70	NK	0.380888	0.039585	0.394634	0.0525642	early T	1.12199	2.94572	7.38177e-173
SPOCK2	NK	0.448183	0.0691141	0.706806	0.0835295	early T	1.11264	2.48256	8.30275e-164
TGFBR3	NK	0.320323	0.0201649	0.15445	0.0315795	early T	1.1068	3.45525	4.63404e-181
CD3D	NK	0.433378	0.064166	0.665576	0.0782066	early T	1.10442	2.5484	8.78514e-162
CLEC2B	NK	0.617766	0.151476	0.650524	0.169209	early T	1.09754	1.77662	3.17796e-171
NCR3	NK	0.39031	0.047087	0.500654	0.0601392	early T	1.0972	2.81109	4.17636e-163
TMIGD2	NK	0.462988	0.0801277	0.603403	0.0946873	early T	1.09134	2.35718	1.05492e-156
TXK	NK	0.356662	0.0346901	0.364529	0.0469342	early T	1.09103	3.05901	3.14474e-166
MATK	NK	0.706595	0.198085	0.87234	0.217422	SIGLEC15+ mac	1.0782	1.52591	2.13892e-184
RORA	NK	0.35397	0.0360734	0.39856	0.0481626	early T	1.07365	3.03317	1.08035e-160
DENND2D	NK	0.496635	0.100984	0.445681	0.11603	early T	1.0697	2.1539	1.92306e-150
TENT5C	NK	0.41319	0.0620378	0.481675	0.0753915	early T	1.06812	2.58506	2.68006e-151
CD69	NK	0.811575	0.249907	0.880236	0.271266	early T	1.05882	1.30465	1.45248e-213
RARRES3	NK	0.807537	0.248364	0.828534	0.269628	early T	1.05845	1.31071	8.51717e-212
IL32	NK	0.502019	0.107688	0.842277	0.122684	early T	1.05331	2.09814	1.23642e-145
PTPRCAP	NK	0.570659	0.145251	0.672761	0.161429	B cell	1.04071	1.82369	2.03937e-147
LDB2	NK	0.328398	0.0316574	0.223168	0.042942	early T	1.03377	3.14791	3.70427e-152
CMC1	NK	0.79677	0.25709	0.705167	0.277613	SIGLEC15+ mac	1.02108	1.28153	6.28953e-196
KLRF1	NK	0.231494	0.0037776	0.0183246	0.0124373	early T	1.01558	4.38706	1.33639e-189
SYTL3	NK	0.414536	0.074009	0.270142	0.0869587	mast	1.01243	2.44232	1.48993e-133
LINC01871	NK	0.314939	0.0331471	0.391361	0.0438632	early T	0.984714	3.12668	2.5776e-138
C1orf21	NK	0.30821	0.0329875	0.285714	0.0434538	SIGLEC15+ mac	0.966564	3.13606	1.01445e-133
PTGDR	NK	0.25572	0.0151104	0.164921	0.0242604	early T	0.951	3.71891	2.13755e-145
FCMR	NK	0.557201	0.16962	0.577697	0.184359	B cell	0.942155	1.69087	3.43678e-117
MCTP2	NK	0.347241	0.0556531	0.345972	0.0667417	mast	0.939955	2.70692	1.45027e-117
SEPT1	NK	0.452221	0.112743	0.568717	0.125653	early T	0.938012	2.07423	3.27152e-110
GIMAP7	NK	0.496635	0.143176	0.521597	0.156618	early T	0.920735	1.85395	1.84532e-106
OPTN	NK	0.30148	0.0388933	0.271597	0.0488791	early T	0.90999	3.01841	2.34299e-116
PDE4D	NK	0.46568	0.130567	0.572644	0.14331	early T	0.904695	1.94274	7.14382e-101
STAT4	NK	0.351279	0.0673051	0.342277	0.0781042	early T	0.895659	2.54971	2.13279e-103
PTPN4	NK	0.327052	0.0545358	0.291885	0.0648992	early T	0.894463	2.73492	1.84532e-106
CD8A	NK	0.266487	0.0268156	0.314791	0.03593	early T	0.886385	3.32618	7.82423e-118
S1PR5	NK	0.191117	0.00313913	0.0373037	0.0102876	early T	0.874707	4.57681	6.76705e-155
CD160	NK	0.22611	0.0128758	0.149869	0.0209847	early T	0.873681	3.86396	2.5536e-129
IKZF3	NK	0.279946	0.0353818	0.299738	0.0446822	early T	0.870123	3.10818	1.57199e-108
ISG20	NK	0.484522	0.157914	0.513711	0.170335	B cell	0.857599	1.76999	1.74171e-88
IL18RAP	NK	0.253028	0.0252727	0.217932	0.0339339	early T	0.856081	3.38334	8.41865e-112
ITM2A	NK	0.372813	0.092365	0.69708	0.10303	MEMP	0.847305	2.27274	3.79146e-87
TC2N	NK	0.292059	0.0460229	0.501963	0.0553793	early T	0.845088	2.89355	1.18343e-97
TRGV9	NK	0.292059	0.0468742	0.385471	0.0561982	early T	0.840801	2.87887	2.57181e-96
CD38	NK	0.519515	0.190742	0.764933	0.203245	pre-B	0.827767	1.59334	1.38477e-82
KIR2DL4	NK	0.179004	0.00335196	0.0366492	0.0100317	early T	0.823777	4.602	7.47429e-141
PTPN22	NK	0.352624	0.0882682	0.519757	0.0983212	SIGLEC15+ mac	0.817918	2.31952	1.40906e-80
SPON2	NK	0.228802	0.0203246	0.284722	0.0282526	pDC prec	0.816039	3.56657	8.80301e-107
APOBEC3G	NK	0.40646	0.125406	0.320026	0.136094	early T	0.810649	1.99441	2.32415e-75
ERN1	NK	0.471063	0.171801	0.618056	0.183181	pDC prec	0.799525	1.69728	1.03175e-72
CLDND1	NK	0.487214	0.182549	0.507299	0.194135	MEMP	0.798643	1.6392	3.93962e-73
GATA3	NK	0.242261	0.029742	0.293194	0.0378237	early T	0.793361	3.27482	2.97234e-94
PITPNC1	NK	0.327052	0.0806065	0.270288	0.0899785	early T	0.787603	2.40818	7.17305e-75
FASLG	NK	0.208614	0.0160149	0.191754	0.0233391	early T	0.783892	3.75762	4.87603e-104
TBX21	NK	0.183042	0.00808726	0.0844241	0.0147405	early T	0.771916	4.21716	1.05192e-113
GBP5	NK	0.288022	0.060016	0.352113	0.0686867	ifn-induced mac	0.771379	2.6782	3.46202e-76
HSH2D	NK	0.302826	0.0696462	0.331288	0.0785137	HSC/MPP	0.770536	2.54448	1.9286e-73
ACAP1	NK	0.418573	0.151796	0.543194	0.161941	early T	0.762023	1.82052	1.3983e-62
PRTN3	NMP	0.842566	0.00359469	0.0204499	0.0183233	HSC/MPP	3.36991	3.99958	0
MPO	NMP	0.994169	0.0217244	0.0952381	0.0387962	neutro	3.23049	3.24943	0
AZU1	NMP	0.962099	0.0185986	0.104762	0.0351622	neutro	3.2209	3.34778	0
CTSG	NMP	0.685131	0.00995051	0.246445	0.0218037	mast	2.62109	3.82568	0
MS4A3	NMP	0.784257	0.0246418	0.620853	0.0379773	mast	2.56512	3.27077	0
RNASE3	NMP	0.638484	0.0194321	0.090175	0.0302999	tissue-repair mac cycling	2.23253	3.49661	3.39242e-254
DEFA4	NMP	0.405248	0.001615	0.1	0.00870099	neutro	1.92262	4.74432	2.50948e-221
ELANE	NMP	0.376093	0.000625163	0.0238095	0.00721671	neutro	1.85465	4.93136	1.07575e-218
RNASE2	NMP	0.787172	0.0895025	0.404798	0.10175	mono	1.79887	2.28523	8.10623e-200
PRSS57	NMP	0.629738	0.0581401	0.952555	0.0681748	MEMP	1.69127	2.68568	3.69339e-163
SERPINB10	NMP	0.390671	0.00948164	0.0857143	0.0161736	neutro	1.61127	4.12437	3.22232e-154
AC084033.3	NMP	0.77551	0.127273	0.963504	0.138653	MEMP	1.53224	1.97578	3.86647e-157
CLEC11A	NMP	0.813411	0.141651	0.791971	0.153445	MEMP	1.52467	1.87442	3.69339e-163
S100P	NMP	0.658892	0.100495	0.828571	0.110298	neutro	1.45257	2.20457	1.17995e-129
SLPI	NMP	0.291545	0.00442824	0.0809524	0.00946873	neutro	1.35853	4.65976	3.60094e-126
S100A8	NMP	0.723032	0.154155	1	0.164142	neutro	1.30654	1.80703	4.99046e-116
SPNS3	NMP	0.553936	0.0876791	0.361111	0.0958645	pDC prec	1.29888	2.34482	4.80237e-100
RASGRP2	NMP	0.708455	0.168013	0.60219	0.1775	MEMP	1.22476	1.72878	1.67571e-102
MGST1	NMP	0.425656	0.0565251	0.478102	0.0630054	MEMP	1.17674	2.76453	2.34619e-81
PLAC8	NMP	0.860058	0.245168	0.951389	0.255963	pDC prec	1.17202	1.36272	1.01948e-121
DEFA3	NMP	0.239067	0.00369888	0.195238	0.00783089	neutro	1.1594	4.84968	8.46444e-102
S100A9	NMP	0.827988	0.236259	1	0.246648	neutro	1.15901	1.39979	9.55668e-113
TSPOAP1	NMP	0.279883	0.0120344	0.0633947	0.0167366	HSC/MPP	1.14477	4.09016	3.93933e-89
RGL4	NMP	0.475219	0.0839281	0.495238	0.0907974	neutro	1.14011	2.39912	9.82733e-76
KBTBD11	NMP	0.303207	0.0185465	0.0685907	0.0235439	mono	1.13669	3.74889	2.96929e-84
RFLNB	NMP	0.434402	0.0685074	0.290476	0.0749309	neutro	1.12562	2.59119	6.22649e-74
NUCB2	NMP	0.752187	0.214848	0.868613	0.224281	MEMP	1.12441	1.49486	1.60884e-94
CSTA	NMP	0.693878	0.190779	0.824963	0.199611	mono	1.1181	1.61138	5.69912e-86
ACTN1	NMP	0.495627	0.103777	0.561947	0.110656	mega	1.09104	2.20133	2.97334e-69
MCM7	NMP	0.612245	0.161657	0.722628	0.169567	MEMP	1.08643	1.77451	4.54891e-74
PRAM1	NMP	0.676385	0.195051	0.557721	0.203501	mono	1.07686	1.59208	1.71942e-78
MYB	NMP	0.413994	0.0685074	0.759124	0.0745726	MEMP	1.07472	2.59598	3.12799e-67
RETN	NMP	0.932945	0.310602	0.914286	0.321527	neutro	1.05859	1.13467	9.0868e-126
SPN	NMP	0.539359	0.133941	0.781022	0.141058	MEMP	1.05638	1.95858	6.02898e-66
LYZ	NMP	0.991254	0.342381	0.961905	0.353772	neutro	1.03001	1.0391	5.77187e-147
CEBPE	NMP	0.314869	0.0336025	0.338095	0.0385403	neutro	1.02523	3.25605	6.02898e-66
FLNA	NMP	0.734694	0.240167	0.832827	0.248848	SIGLEC15+ mac	1.02189	1.39091	4.48593e-78
NFE2	NMP	0.422741	0.0843449	0.90146	0.0902856	MEMP	1.0166	2.40478	3.67326e-59
KCNE5	NMP	0.28863	0.025788	0.173611	0.0304023	pDC prec	1.00825	3.49324	3.15919e-66
BPI	NMP	0.306122	0.0325606	0.6	0.0373631	neutro	1.00625	3.28707	4.93132e-64
NKG7	NMP	0.798834	0.274603	0.993271	0.283806	NK	1.0061	1.25946	9.17989e-86
PTPN7	NMP	0.51895	0.139151	0.638686	0.145818	MEMP	0.999184	1.92539	9.46305e-58
NUP210	NMP	0.446064	0.102423	0.30292	0.108455	MEMP	0.990894	2.22142	1.4949e-55
ATP2A3	NMP	0.419825	0.0915864	0.50365	0.0973488	MEMP	0.977964	2.32946	4.49764e-54
PCLAF	NMP	0.434402	0.0995572	0.689781	0.105436	MEMP	0.977256	2.24966	7.98907e-54
LYST	NMP	0.641399	0.210836	0.485382	0.218395	mono	0.975857	1.52145	6.33344e-62
C1QTNF4	NMP	0.309038	0.0390206	0.490798	0.0437609	HSC/MPP	0.966984	3.12902	4.35457e-58
MFSD10	NMP	0.664723	0.226309	0.68997	0.234006	SIGLEC15+ mac	0.965451	1.45241	1.11119e-62
CFD	NMP	0.620991	0.204428	0.710645	0.211741	mono	0.964021	1.55239	9.30004e-59
MLC1	NMP	0.38484	0.0836676	0.464213	0.0889549	HSC/MPP	0.931168	2.41963	9.4714e-49
PTK2B	NMP	0.457726	0.130451	0.323108	0.136196	HSC/MPP	0.91255	1.99366	1.44714e-45
UHRF1	NMP	0.390671	0.0944517	0.517241	0.099652	pro-B	0.900914	2.30607	1.07858e-44
CSF3R	NMP	0.620991	0.228132	0.734258	0.235029	mono	0.899224	1.44805	1.33142e-50
IGFBP7	NMP	0.373178	0.086585	0.59854	0.0916163	MEMP	0.891949	2.39015	4.42983e-44
MCM4	NMP	0.364431	0.0824694	0.445255	0.0874194	MEMP	0.888133	2.43704	6.4178e-44
SYNGR1	NMP	0.466472	0.145507	0.486322	0.151141	SIGLEC15+ mac	0.881418	1.88954	7.4571e-42
ARMH1	NMP	0.364431	0.0846054	0.394161	0.0895179	MEMP	0.879489	2.41332	8.32316e-43
SMIM24	NMP	0.303207	0.0515759	0.756646	0.0559934	HSC/MPP	0.874	2.88252	1.13484e-45
CDT1	NMP	0.358601	0.0826257	0.580292	0.0874706	MEMP	0.873713	2.43645	2.57679e-42
MCM2	NMP	0.349854	0.0792915	0.510949	0.0840414	MEMP	0.866395	2.47645	8.81319e-42
GCHFR	NMP	0.434402	0.131024	0.470803	0.13635	MEMP	0.865561	1.99253	9.35079e-40
CCDC88B	NMP	0.411079	0.117895	0.37619	0.123042	neutro	0.861303	2.09523	2.11001e-39
CDCA7L	NMP	0.387755	0.105809	0.485401	0.110759	MEMP	0.853217	2.2004	7.95653e-39
IGFBP2	NMP	0.309038	0.0595468	0.309555	0.0639267	early T	0.84986	2.75002	4.81467e-42
AC020656.1	NMP	0.241983	0.0262047	0.149925	0.0299928	mono	0.848583	3.5068	8.08728e-49
FUT4	NMP	0.244898	0.0276635	0.0551817	0.0314771	tissue-repair mac cycling	0.846978	3.45849	3.45259e-48
STXBP2	NMP	0.804665	0.341964	0.874438	0.350087	mono	0.844555	1.04957	4.3566e-65
CENPM	NMP	0.376093	0.101485	0.60969	0.106306	tissue-repair mac cycling	0.842989	2.24144	7.12555e-38
TYMS	NMP	0.419825	0.129461	0.740876	0.134558	MEMP	0.842067	2.00576	5.34355e-37
CLEC5A	NMP	0.285714	0.0494921	0.232384	0.0536391	mono	0.835851	2.92548	4.4138e-42
MCM6	NMP	0.376093	0.103621	0.481752	0.108404	MEMP	0.835638	2.22189	5.62641e-37
ATAD2	NMP	0.379009	0.106903	0.472409	0.11168	tissue-repair mac cycling	0.830832	2.19212	2.5592e-36
PCNA	NMP	0.44898	0.152696	0.624088	0.157897	MEMP	0.828731	1.84581	2.01394e-35
MNDA	NMP	0.685131	0.295337	0.88006	0.30218	mono	0.819918	1.19673	1.93465e-46
MCM3	NMP	0.408163	0.129357	0.583942	0.134251	MEMP	0.819609	2.00804	1.85461e-34
CENPW	NMP	0.446064	0.15603	0.637954	0.161122	tissue-repair mac cycling	0.814332	1.82559	9.27983e-34
EIF3B	NMP	0.434402	0.148997	0.49635	0.154008	MEMP	0.81266	1.87075	1.57803e-33
KIF22	NMP	0.44898	0.159052	0.625841	0.164142	tissue-repair mac cycling	0.811318	1.80703	1.96751e-33
HELLS	NMP	0.349854	0.0940349	0.5	0.0985259	MEMP	0.810765	2.31744	7.75292e-35
TRGC1	NMP	0.221574	0.023131	0.161649	0.0266148	early T	0.803492	3.62629	2.28633e-45
SERPINB8	NMP	0.285714	0.0563688	0.172789	0.0603951	mono	0.801956	2.80685	1.25577e-37
PSTPIP1	NMP	0.431487	0.151289	0.711246	0.156208	SIGLEC15+ mac	0.801083	1.85656	3.45614e-32
VSTM1	NMP	0.268222	0.0468351	0.272114	0.0507217	mono	0.799676	2.9814	6.26573e-39
MEG3	NMP	0.236152	0.0303725	0.452555	0.0339851	MEMP	0.798626	3.38183	1.5649e-42
DGKZ	NMP	0.571429	0.243188	0.394347	0.248951	tissue-repair mac cycling	0.794572	1.3905	3.90257e-35
TESMIN	NMP	0.233236	0.0305809	0.474453	0.0341386	MEMP	0.787715	3.37733	1.9705e-41
NSUN5	NMP	0.469388	0.182756	0.445255	0.187788	MEMP	0.785024	1.67244	1.09988e-30
MKI67	NMP	0.341108	0.0964314	0.846568	0.100727	tissue-repair mac cycling	0.78296	2.29534	7.13292e-32
ACTN4	NMP	0.588921	0.261266	0.616788	0.267018	MEMP	0.777634	1.32044	3.44065e-34
ERLIN1	NMP	0.279883	0.0585569	0.288321	0.0624424	MEMP	0.776259	2.77351	8.121e-35
C19orf48	NMP	0.451895	0.174889	0.817518	0.179752	MEMP	0.775531	1.71618	2.08471e-29
CNIH4	NMP	0.48105	0.195728	0.632219	0.200737	SIGLEC15+ mac	0.77245	1.60576	1.73975e-29
GRK2	NMP	0.635569	0.291847	0.445255	0.297881	MEMP	0.769712	1.21106	2.49023e-36
CITED4	NMP	0.276968	0.05913	0.152086	0.0629542	tissue-repair mac cycling	0.765912	2.76535	9.15694e-34
PHF19	NMP	0.396501	0.140766	0.589502	0.145255	tissue-repair mac cycling	0.764955	1.92926	2.54936e-28
PHGDH	NMP	0.274052	0.0577234	0.268966	0.0615211	pro-B	0.764161	2.78837	8.63594e-34
TMEM173	NMP	0.443149	0.175306	0.69708	0.180008	MEMP	0.759891	1.71475	1.25357e-27
UQCC3	NMP	0.446064	0.177598	0.470803	0.182311	MEMP	0.759219	1.70204	1.41068e-27
KIAA0930	NMP	0.495627	0.212034	0.469717	0.217013	tissue-repair mac cycling	0.757218	1.5278	3.69845e-28
CLSPN	NMP	0.303207	0.07851	0.427995	0.0824547	tissue-repair mac cycling	0.756655	2.49551	1.09192e-30
LTF	neutro	0.919048	0.00222475	0.0104948	0.012079	mono	4.05878	4.41628	0
LCN2	neutro	0.861905	0.00382864	0.20354	0.0130515	mega	3.73968	4.33885	0
CAMP	neutro	0.87619	0.00884727	0.0449775	0.0181697	mono	3.51177	4.008	3.46295e-309
CD177	neutro	0.704762	0.00274214	0.017991	0.0102876	mono	3.22556	4.57681	3.65506e-270
PGLYRP1	neutro	0.942857	0.0235927	0.157046	0.0334732	mono	3.20289	3.39701	4.02536e-284
CRISP3	neutro	0.595238	0.0020178	0.056872	0.0083939	mast	2.84539	4.78025	8.36977e-226
CHI3L1	neutro	0.519048	0.00703642	0.0281109	0.0125397	mono	2.27284	4.37886	3.43163e-155
ARG1	neutro	0.528571	0.00869205	0.05997	0.0142799	mono	2.24585	4.2489	1.44928e-151
TFF3	neutro	0.528571	0.00895075	0.0236132	0.0145358	mono	2.23646	4.23114	1.55101e-150
BPI	neutro	0.6	0.03125	0.306122	0.0373631	NMP	1.97224	3.28707	3.60904e-123
CEACAM8	neutro	0.37619	0.00144868	0.0553936	0.00547651	NMP	1.95893	5.20729	1.48185e-134
ANXA3	neutro	0.528571	0.0200745	0.234513	0.02554	mega	1.93854	3.66751	5.65798e-119
CDA	neutro	0.828571	0.0991825	0.636807	0.107022	mono	1.85162	2.23472	4.44636e-130
S100A12	neutro	0.82381	0.100993	0.672039	0.108762	mono	1.8277	2.21859	2.78431e-127
S100P	neutro	0.828571	0.102494	0.658892	0.110298	NMP	1.82664	2.20457	8.56161e-128
CHIT1	neutro	0.357143	0.00232823	0.00525394	0.00614188	microglia-like mac	1.81879	5.09262	1.81395e-118
HP	neutro	0.609524	0.0449607	0.282984	0.0510288	mono	1.81356	2.97537	2.4854e-108
S100A8	neutro	1	0.15506	0.892054	0.164142	mono	1.80703	1.80703	1.80505e-164
CEACAM1	neutro	0.433333	0.0161941	0.0446027	0.0206777	mono	1.68077	3.8787	2.99591e-95
PADI4	neutro	0.709524	0.0876449	0.544228	0.094329	mono	1.67516	2.36097	1.90674e-101
ORM1	neutro	0.438095	0.0204367	0.139055	0.0249258	mono	1.61738	3.69185	7.9857e-89
S100A9	neutro	1	0.238462	0.968141	0.246648	mono	1.39979	1.39979	1.25135e-126
CKAP4	neutro	0.57619	0.0843853	0.372939	0.0896714	mono	1.38954	2.4116	1.29554e-68
CD24	neutro	0.62381	0.105081	0.882466	0.110656	pre-B	1.37321	2.20133	3.87254e-69
MMP8	neutro	0.228571	5.17384e-05	0.000374813	0.00250793	mono	1.36875	5.9883	6.26118e-93
FCN1	neutro	0.790476	0.178653	0.938156	0.185229	mono	1.33287	1.68616	1.16288e-78
FOLR3	neutro	0.390476	0.0293357	0.201274	0.0332173	mono	1.32945	3.40468	4.11476e-63
RGL4	neutro	0.495238	0.0864031	0.475219	0.0907974	NMP	1.18814	2.39912	1.55856e-49
MCEMP1	neutro	0.485714	0.0945778	0.518366	0.0987819	mono	1.12435	2.31484	4.10956e-44
CEBPE	neutro	0.338095	0.0352856	0.314869	0.0385403	NMP	1.10086	3.25605	1.17188e-44
ADGRG3	neutro	0.319048	0.0337334	0.167541	0.0368001	mono	1.05358	3.30226	1.66629e-41
RETN	neutro	0.914286	0.315087	0.932945	0.321527	NMP	1.03742	1.13467	1.85216e-70
MNDA	neutro	0.857143	0.296151	0.88006	0.30218	mono	1.02577	1.19673	2.14464e-60
AC245128.3	neutro	0.309524	0.0341991	0.191154	0.0371584	mono	1.01913	3.29257	5.17473e-39
LYZ	neutro	0.961905	0.347165	0.991254	0.353772	NMP	0.999517	1.0391	3.20163e-77
UGCG	neutro	0.504762	0.144247	0.875	0.148122	pDC prec	0.963955	1.90972	1.51474e-31
AL034397.3	neutro	0.42381	0.103477	0.357664	0.10692	MEMP	0.947501	2.23568	7.44246e-30
DEFA3	neutro	0.195238	0.0057947	0.239067	0.00783089	NMP	0.946842	4.84968	2.76149e-43
ACTN1	neutro	0.428571	0.107202	0.561947	0.110656	mega	0.943426	2.20133	1.61221e-29
STXBP2	neutro	0.866667	0.344474	0.874438	0.350087	mono	0.90963	1.04957	8.1976e-52
SYNE1	neutro	0.366667	0.0832471	0.22611	0.0862934	NK	0.898334	2.45	6.87565e-27
CYSTM1	neutro	0.580952	0.211403	0.787234	0.215375	SIGLEC15+ mac	0.891979	1.53537	3.91546e-28
PLBD1	neutro	0.52381	0.181705	0.575337	0.185382	mono	0.882794	1.68533	7.243e-26
TSPAN2	neutro	0.242857	0.0246792	0.20438	0.0270243	MEMP	0.876962	3.61102	2.67786e-31
S100A6	neutro	0.980952	0.403404	0.977136	0.409612	mono	0.875544	0.892545	3.22543e-71
HK3	neutro	0.295238	0.0489445	0.253373	0.0515918	mono	0.875202	2.96439	1.18749e-27
EMB	neutro	0.528571	0.188121	0.405248	0.19178	NMP	0.872886	1.65141	2.99579e-25
NKG7	neutro	0.690476	0.279387	0.993271	0.283806	NK	0.86963	1.25946	9.13919e-32
ABCA13	neutro	0.152381	0.00191432	0.0291545	0.00353158	NMP	0.860344	5.64601	2.18317e-42
FGR	neutro	0.452381	0.156716	0.683283	0.159894	mono	0.829326	1.83325	4.63934e-21
RAB27A	neutro	0.37619	0.108806	0.334333	0.11168	mono	0.824654	2.19212	4.15532e-21
MMP9	neutro	0.428571	0.151024	0.978723	0.154008	SIGLEC15+ mac	0.801751	1.87075	4.55214e-19
OLR1	neutro	0.314286	0.0756933	0.345009	0.0782578	microglia-like mac	0.800721	2.54775	6.06046e-21
CCDC88B	neutro	0.37619	0.120292	0.411079	0.123042	NMP	0.788205	2.09523	1.7051e-18
MSRB1	neutro	0.42381	0.153922	0.514993	0.156823	mono	0.785166	1.85264	6.22478e-18
COL17A1	neutro	0.133333	0.00150041	0.0641399	0.00291739	NMP	0.778275	5.83707	8.95377e-38
TCN1	neutro	0.128571	0.00108651	0.0521327	0.00245675	mast	0.772575	6.00892	1.55845e-38
TSPO	neutro	0.971429	0.446761	0.963526	0.4524	SIGLEC15+ mac	0.770525	0.793188	4.22507e-59
OLFM4	neutro	0.119048	0.00031043	0.00874636	0.00158665	NMP	0.767396	6.44613	7.0958e-42
RFLNB	neutro	0.290476	0.072589	0.434402	0.0749309	NMP	0.752679	2.59119	2.70294e-18
PRAM1	neutro	0.471429	0.20059	0.676385	0.203501	NMP	0.750554	1.59208	7.41608e-16
CEACAM3	neutro	0.161905	0.00838162	0.0554723	0.0100317	mono	0.745086	4.602	1.35157e-28
GCA	neutro	0.652381	0.320675	0.712894	0.32424	mono	0.734758	1.12627	5.88554e-20
LTB4R	neutro	0.290476	0.0777111	0.297226	0.079998	mono	0.733671	2.52575	6.58807e-17
DRC1	neutro	0.157143	0.00791598	0.0427286	0.00951991	mono	0.731401	4.65437	4.75597e-28
MGAM	neutro	0.180952	0.0169185	0.111319	0.0186815	mono	0.72023	3.98022	7.73833e-24
NBEAL2	neutro	0.3	0.0923531	0.241983	0.0945849	NMP	0.707477	2.35826	1.12444e-14
B4GALT5	neutro	0.252381	0.0587748	0.209913	0.0608558	NMP	0.706477	2.79925	9.11533e-17
BASP1	neutro	0.495238	0.237479	0.567466	0.24025	mono	0.706247	1.42608	2.55443e-13
NCF1	neutro	0.842857	0.43362	0.888889	0.438018	pDC prec	0.695774	0.825495	2.27631e-31
LTA4H	neutro	0.557143	0.287821	0.69708	0.290716	MEMP	0.6883	1.23541	1.76953e-13
CSTA	neutro	0.42381	0.197175	0.824963	0.199611	mono	0.68292	1.61138	2.63596e-11
BST1	neutro	0.290476	0.0932326	0.438531	0.0953526	mono	0.682669	2.35017	2.64283e-13
PSTPIP1	neutro	0.366667	0.153922	0.711246	0.156208	SIGLEC15+ mac	0.68074	1.85656	1.91931e-11
BCL2A1	neutro	0.447619	0.219319	0.617316	0.221773	mono	0.67416	1.5061	7.02907e-11
STOM	neutro	0.452381	0.225528	0.619469	0.227966	mega	0.668872	1.47856	1.32085e-10
ADSS	neutro	0.428571	0.211869	0.702128	0.214198	SIGLEC15+ mac	0.660366	1.54085	5.55631e-10
CFP	neutro	0.371429	0.172237	0.755622	0.174378	mono	0.648711	1.74653	1.78844e-09
GYG1	neutro	0.495238	0.269609	0.4666	0.272034	cDC2	0.644715	1.30183	1.11962e-09
ATP2A3	neutro	0.27619	0.0954056	0.50365	0.0973488	MEMP	0.643373	2.32946	3.47305e-11
CCPG1	neutro	0.371429	0.177773	0.29646	0.179855	mega	0.637225	1.71561	8.05872e-09
IVNS1ABP	neutro	0.542857	0.309396	0.580292	0.311905	MEMP	0.632459	1.16506	7.55235e-10
DYSF	neutro	0.219048	0.0559292	0.25937	0.0576825	mono	0.624899	2.8528	8.46462e-13
VNN1	neutro	0.161905	0.0211093	0.0873313	0.0226226	mono	0.613426	3.78881	5.98407e-17
G0S2	neutro	0.290476	0.120344	0.601574	0.122172	mono	0.610675	2.10232	1.10351e-08
FLNA	neutro	0.438095	0.246792	0.832827	0.248848	SIGLEC15+ mac	0.609352	1.39091	3.2865e-07
ITGAM	neutro	0.409524	0.2247	0.390555	0.226686	mono	0.60781	1.48419	4.74238e-07
CCDC125	neutro	0.190476	0.0405112	0.193431	0.042123	MEMP	0.603269	3.16716	2.5465e-13
TUBA4A	neutro	0.285714	0.119516	0.761062	0.121302	mega	0.602706	2.10947	2.4418e-08
TMEM63A	neutro	0.204762	0.0513762	0.173611	0.0530249	pDC prec	0.601385	2.93699	4.53189e-12
VSTM1	neutro	0.2	0.0490998	0.272114	0.0507217	mono	0.59628	2.9814	4.72652e-12
CLC	neutro	0.128571	0.00879553	0.559242	0.0100829	mast	0.591032	4.59691	1.46891e-19
MMP25	neutro	0.147619	0.0172289	0.0637181	0.0186304	mono	0.587961	3.98296	1.40056e-16
PYGL	neutro	0.447619	0.267229	0.468141	0.269168	mono	0.587464	1.31242	3.83925e-06
CA4	neutro	0.104762	0.00284561	0.00862069	0.00394104	mono	0.579995	5.53631	4.59724e-23
CLEC4D	neutro	0.133333	0.0116929	0.0764618	0.0130003	mono	0.579038	4.34278	9.10954e-18
C19orf38	neutro	0.414286	0.245395	0.705772	0.247211	mono	0.57897	1.39751	1.39845e-05
ATP2C2	neutro	0.0904762	0.000724338	0.00449775	0.00168902	mono	0.577565	6.38361	6.39093e-27
EPPK1	neutro	0.0857143	0.000362169	0.00442478	0.00127956	mega	0.570963	6.66124	4.30651e-28
GRK6	neutro	0.27619	0.129967	0.275487	0.131539	mono	0.56024	2.02846	3.82437e-06
S100A8	mono	0.892054	0.0490219	1	0.164142	neutro	1.61196	1.80703	0
FCN1	mono	0.938156	0.0661529	0.790476	0.185229	neutro	1.58188	1.68616	0
VCAN	mono	0.768741	0.0377593	0.169096	0.137578	NMP	1.52485	1.98356	0
S100A12	mono	0.672039	0.0196799	0.82381	0.108762	neutro	1.49098	2.21859	0
CDA	mono	0.636807	0.0232365	0.828571	0.107022	neutro	1.42308	2.23472	0
S100A9	mono	0.968141	0.132543	1	0.246648	neutro	1.3552	1.39979	0
SMIM25	mono	0.620315	0.0334321	0.138095	0.113574	neutro	1.34937	2.1753	0
CSTA	mono	0.824963	0.100711	0.693878	0.199611	NMP	1.32933	1.61138	0
CFP	mono	0.755622	0.0824541	0.514457	0.174378	cDC2	1.31972	1.74653	0
PADI4	mono	0.544228	0.0231772	0.709524	0.094329	neutro	1.2849	2.36097	0
G0S2	mono	0.601574	0.0463545	0.290476	0.122172	neutro	1.2647	2.10232	0
FGR	mono	0.683283	0.0771191	0.452381	0.159894	neutro	1.25263	1.83325	0
SERPINA1	mono	0.652549	0.0735625	0.35493	0.152626	ifn-induced mac	1.22664	1.87977	0
S100P	mono	0.553973	0.0401304	0.828571	0.110298	neutro	1.22127	2.20457	0
MCEMP1	mono	0.518366	0.0324244	0.485714	0.0987819	neutro	1.19993	2.31484	0
RBP7	mono	0.581709	0.0605216	0.161905	0.131692	neutro	1.17929	2.02729	0
LILRA5	mono	0.561844	0.056313	0.246261	0.125345	cDC2	1.16677	2.07668	0
SELL	mono	0.691529	0.105513	0.854167	0.185536	pDC prec	1.16489	1.68451	0
SLC11A1	mono	0.554348	0.0548311	0.218914	0.123042	microglia-like mac	1.16148	2.09523	0
THBS1	mono	0.56072	0.0604031	0.654867	0.128724	mega	1.14952	2.05009	0
CFD	mono	0.710645	0.132839	0.620991	0.211741	NMP	1.1032	1.55239	0
ASGR1	mono	0.47901	0.0413752	0.15653	0.101136	cDC2	1.09755	2.29129	0
CSF3R	mono	0.734258	0.156076	0.620991	0.235029	NMP	1.06324	1.44805	0
LRRK2	mono	0.491754	0.0580913	0.186441	0.11731	cDC2	1.0538	2.14294	0
MNDA	mono	0.88006	0.210788	0.857143	0.30218	neutro	1.0532	1.19673	0
TREM1	mono	0.491754	0.0643154	0.19342	0.122684	cDC2	1.03177	2.09814	0
BST1	mono	0.438531	0.0410788	0.290476	0.0953526	neutro	1.03062	2.35017	0
LYZ	mono	0.951274	0.259277	0.991254	0.353772	NMP	0.988471	1.0391	0
C19orf38	mono	0.705772	0.174689	0.54337	0.247211	cDC2	0.986327	1.39751	0
LILRA2	mono	0.56072	0.110788	0.362911	0.172228	cDC2	0.986268	1.75893	0
PLBD1	mono	0.575337	0.123711	0.568389	0.185382	SIGLEC15+ mac	0.969636	1.68533	0
GLIPR2	mono	0.569715	0.122703	0.391825	0.183744	cDC2	0.965217	1.69421	0
ICAM3	mono	0.728636	0.195851	0.625767	0.268605	HSC/MPP	0.957802	1.31451	0
MSRB1	mono	0.514993	0.100178	0.42381	0.156823	neutro	0.954096	1.85264	0
BCL2A1	mono	0.617316	0.159218	0.447619	0.221773	neutro	0.929741	1.5061	0
RNASE2	mono	0.404798	0.0538234	0.787172	0.10175	NMP	0.925057	2.28523	0
STXBP2	mono	0.874438	0.267161	0.866667	0.350087	neutro	0.917787	1.04957	0
RETN	mono	0.805097	0.24505	0.932945	0.321527	NMP	0.913522	1.13467	0
PILRA	mono	0.673913	0.193124	0.51831	0.258778	ifn-induced mac	0.910986	1.35179	0
MEGF9	mono	0.365067	0.0379964	0.209524	0.0826594	neutro	0.910123	2.49303	0
JAML	mono	0.676912	0.197807	0.7667	0.263231	cDC2	0.903491	1.33472	0
CKAP4	mono	0.372939	0.0448726	0.57619	0.0896714	neutro	0.89938	2.4116	0
FLNA	mono	0.641679	0.186722	0.832827	0.248848	SIGLEC15+ mac	0.892519	1.39091	0
PRAM1	mono	0.557721	0.147481	0.676385	0.203501	NMP	0.887939	1.59208	0
FPR1	mono	0.736882	0.235033	0.532399	0.303562	microglia-like mac	0.878487	1.19217	0
S100A6	mono	0.977136	0.319858	0.980952	0.409612	neutro	0.872138	0.892545	0
CD52	mono	0.766117	0.250267	0.899452	0.320708	B cell	0.871246	1.13722	0
VNN2	mono	0.285982	0.0136929	0.0809524	0.0508752	neutro	0.851763	2.97838	0
LGALS3	mono	0.485382	0.126971	0.860182	0.175914	SIGLEC15+ mac	0.843479	1.73776	0
LILRB3	mono	0.455022	0.110018	0.287324	0.15713	ifn-induced mac	0.842103	1.85068	0
HP	mono	0.282984	0.014345	0.609524	0.0510288	neutro	0.841979	2.97537	0
SULT1A1	mono	0.409295	0.0847659	0.332117	0.129082	MEMP	0.837954	2.04731	0
ANXA2	mono	0.67054	0.23112	1	0.291125	SIGLEC15+ mac	0.827448	1.234	0
FPR2	mono	0.27099	0.0139893	0.138095	0.0490838	neutro	0.816823	3.01423	0
IFI30	mono	0.534483	0.166924	0.620061	0.217115	SIGLEC15+ mac	0.81633	1.52733	0
VSTM1	mono	0.272114	0.0157084	0.268222	0.0507217	NMP	0.811281	2.9814	0
BASP1	mono	0.567466	0.1885	0.540146	0.24025	MEMP	0.80925	1.42608	0
GCA	mono	0.712894	0.262774	0.656535	0.32424	SIGLEC15+ mac	0.802912	1.12627	0
NCF2	mono	0.67916	0.252164	0.538385	0.310472	cDC2	0.794388	1.16966	0
NFE2	mono	0.33021	0.0523414	0.90146	0.0902856	MEMP	0.794081	2.40478	0
CD1D	mono	0.423913	0.112092	0.60319	0.154673	cDC2	0.791209	1.86644	2.05068e-294
CAPG	mono	0.684408	0.259692	0.835866	0.317689	SIGLEC15+ mac	0.784799	1.14668	0
AL034397.3	mono	0.347451	0.0688797	0.42381	0.10692	neutro	0.776788	2.23568	1.03451e-299
S100A10	mono	0.681409	0.26313	0.978723	0.320248	SIGLEC15+ mac	0.775894	1.13866	0
ASGR2	mono	0.32084	0.0526378	0.282154	0.089262	cDC2	0.775206	2.41618	1.68878e-314
PLP2	mono	0.689655	0.271251	0.972222	0.328386	pDC prec	0.767977	1.11357	0
SULF2	mono	0.293478	0.0387078	0.472222	0.0734978	pDC prec	0.766125	2.6105	0
AQP9	mono	0.218891	0.000948429	0.0142857	0.0307094	neutro	0.762437	3.48319	0
MYO1G	mono	0.355322	0.0812092	0.341108	0.118641	NMP	0.757425	2.13166	2.13758e-272
OSM	mono	0.357571	0.0846473	0.192423	0.121916	cDC2	0.75248	2.10442	1.23173e-265
MXD1	mono	0.583583	0.226793	0.360917	0.275514	cDC2	0.752306	1.28912	1.38855e-285
HK3	mono	0.253373	0.0196799	0.295238	0.0515918	neutro	0.751098	2.96439	0
LTB4R	mono	0.297226	0.0456432	0.290476	0.079998	neutro	0.750721	2.52575	3.44294e-301
LTA4H	mono	0.607196	0.240664	0.69708	0.290716	MEMP	0.750137	1.23541	2.60776e-295
SLC7A7	mono	0.57009	0.220569	0.43769	0.268298	SIGLEC15+ mac	0.750044	1.31566	3.39328e-277
MTMR11	mono	0.231634	0.00906935	0.113703	0.0394616	NMP	0.748741	3.23243	0
PSTPIP1	mono	0.402174	0.117309	0.711246	0.156208	SIGLEC15+ mac	0.746662	1.85656	2.65501e-247
TSPO	mono	0.94003	0.375282	0.971429	0.4524	neutro	0.74562	0.793188	0
ABHD5	mono	0.447526	0.149674	0.364964	0.190347	MEMP	0.742404	1.65891	2.19631e-240
SORL1	mono	0.438531	0.144813	0.362522	0.184922	microglia-like mac	0.740162	1.68782	7.32469e-238
DYSF	mono	0.25937	0.0257854	0.219048	0.0576825	neutro	0.739932	2.8528	0
LYST	mono	0.485382	0.176171	0.641399	0.218395	NMP	0.738485	1.52145	3.20075e-240
FCAR	mono	0.23988	0.015412	0.157143	0.0460641	neutro	0.738284	3.07772	0
AGTRAP	mono	0.656297	0.27297	0.568513	0.325315	NMP	0.736996	1.12296	4.06112e-312
RAB27A	mono	0.334333	0.0764671	0.37619	0.11168	neutro	0.732897	2.19212	5.30159e-253
CD55	mono	0.663793	0.279431	0.784672	0.331917	MEMP	0.732077	1.10287	2.69423e-312
NUP214	mono	0.627436	0.261411	0.476447	0.311393	tissue-repair mac cycling	0.732029	1.1667	3.76491e-288
EVI2B	mono	0.429535	0.143331	0.50152	0.182414	SIGLEC15+ mac	0.730845	1.70148	3.04038e-228
AHNAK	mono	0.426162	0.141434	0.696049	0.180315	SIGLEC15+ mac	0.730036	1.71305	1.66916e-227
TNFSF13B	mono	0.567466	0.232069	0.650704	0.277869	ifn-induced mac	0.726701	1.28061	2.42328e-252
ANXA1	mono	0.795352	0.338708	0.981763	0.401065	SIGLEC15+ mac	0.72666	0.913633	0
OSCAR	mono	0.295352	0.054179	0.361702	0.0871123	SIGLEC15+ mac	0.720824	2.44056	1.94147e-263
QPCT	mono	0.231634	0.0151749	0.166667	0.0447333	neutro	0.719696	3.10704	0
CD48	mono	0.567841	0.238767	0.707876	0.283704	cDC2	0.715381	1.25983	3.12352e-241
CDC42EP2	mono	0.355322	0.102015	0.234297	0.136606	cDC2	0.707325	1.99066	1.31034e-215
SIRPB1	mono	0.245877	0.0270302	0.157143	0.0569147	neutro	0.704733	2.8662	3.36222e-296
CLEC12A	mono	0.255997	0.0340842	0.174927	0.0643873	NMP	0.702158	2.74284	1.95527e-278
CLEC4A	mono	0.398426	0.135803	0.933131	0.171665	SIGLEC15+ mac	0.702109	1.76221	5.1266e-201
ALDH2	mono	0.416417	0.149081	0.611111	0.185587	pDC prec	0.701342	1.68423	8.38436e-199
ALOX5	mono	0.376687	0.120391	0.654028	0.155389	mast	0.701323	1.86182	1.09732e-203
CLEC10A	cDC2	0.731805	0.0749933	0.256338	0.108711	ifn-induced mac	1.62392	2.21906	0
CD1C	cDC2	0.607178	0.0616132	0.314939	0.0896202	tissue-repair mac cycling	1.46462	2.41217	0
PKIB	cDC2	0.51346	0.0517939	0.248991	0.0754939	tissue-repair mac cycling	1.32663	2.5837	0
S100B	cDC2	0.502493	0.0664688	0.290713	0.0888525	tissue-repair mac cycling	1.21642	2.42078	1.17338e-273
CD1D	cDC2	0.60319	0.130402	0.423913	0.154673	mono	1.12582	1.86644	1.63001e-244
GPAT3	cDC2	0.48654	0.0837335	0.270615	0.104412	mono	1.09929	2.25941	2.94348e-220
JAML	cDC2	0.7667	0.235986	0.75	0.263231	pDC prec	1.02333	1.33472	1.62355e-254
NDRG2	cDC2	0.491525	0.106933	0.309982	0.126676	microglia-like mac	1.01555	2.06612	1.55055e-184
ENHO	cDC2	0.313061	0.0278932	0.188425	0.0425325	tissue-repair mac cycling	0.988485	3.15749	6.4766e-196
HLA-DQA1	cDC2	0.85344	0.29679	0.923944	0.325366	ifn-induced mac	0.958246	1.1228	1.6564e-274
HLA-DQA2	cDC2	0.694915	0.231238	0.707042	0.255041	ifn-induced mac	0.949483	1.36633	4.12354e-196
ALDH2	cDC2	0.562313	0.165201	0.611111	0.185587	pDC prec	0.947065	1.68423	7.86267e-164
PPA1	cDC2	0.714855	0.241759	0.824818	0.266046	MEMP	0.946531	1.32409	8.91002e-202
ANXA2	cDC2	0.760718	0.265714	1	0.291125	SIGLEC15+ mac	0.938728	1.234	7.78909e-217
PEA15	cDC2	0.578265	0.181764	0.478873	0.202119	ifn-induced mac	0.924588	1.5989	1.28196e-157
CLEC4A	cDC2	0.516451	0.153008	0.933131	0.171665	SIGLEC15+ mac	0.910093	1.76221	4.91423e-144
ADAM28	cDC2	0.464606	0.124683	0.425569	0.142133	microglia-like mac	0.906442	1.95099	1.06291e-139
CFP	cDC2	0.514457	0.155975	0.755622	0.174378	mono	0.898514	1.74653	1.87001e-139
CD48	cDC2	0.707876	0.26075	0.567841	0.283704	mono	0.891801	1.25983	1.37473e-177
ZNF385A	cDC2	0.629113	0.22239	0.720365	0.24327	SIGLEC15+ mac	0.889304	1.41359	2.94393e-154
C15orf48	cDC2	0.385842	0.0850823	0.270423	0.100522	ifn-induced mac	0.886426	2.29738	1.04416e-134
HLA-DQB1	cDC2	0.848455	0.326356	0.884507	0.353158	ifn-induced mac	0.883105	1.04084	1.41486e-239
LGALS2	cDC2	0.28016	0.0307526	0.240122	0.0435561	SIGLEC15+ mac	0.877937	3.1337	6.30495e-155
IL13RA1	cDC2	0.531406	0.173348	0.510638	0.191729	SIGLEC15+ mac	0.877708	1.65167	2.55496e-133
S100A10	cDC2	0.765703	0.296142	0.978723	0.320248	SIGLEC15+ mac	0.871876	1.13866	4.97502e-192
ABI3	cDC2	0.547358	0.189425	0.607903	0.2078	SIGLEC15+ mac	0.859997	1.57118	1.17806e-128
P2RY6	cDC2	0.398804	0.100513	0.332394	0.115826	ifn-induced mac	0.859689	2.15567	4.7119e-123
CTSH	cDC2	0.840479	0.335689	0.735211	0.361603	ifn-induced mac	0.854942	1.01721	4.78442e-223
FCER1A	cDC2	0.235294	0.0158619	0.434307	0.0271266	MEMP	0.848762	3.60724	4.10915e-163
PAK1	cDC2	0.747757	0.302886	0.617766	0.325724	tissue-repair mac cycling	0.838762	1.1217	1.5405e-171
UPK3A	cDC2	0.29013	0.0439709	0.368056	0.0566076	pDC prec	0.833139	2.87161	3.62976e-131
NAPSA	cDC2	0.270189	0.0342595	0.3125	0.0463712	pDC prec	0.829773	3.07108	1.54831e-136
AHNAK	cDC2	0.482552	0.16396	0.696049	0.180315	SIGLEC15+ mac	0.826636	1.71305	1.52959e-110
CPVL	cDC2	0.740778	0.305908	0.569343	0.328232	MEMP	0.825252	1.11403	1.31795e-163
PRCP	cDC2	0.569292	0.216725	0.887538	0.234824	SIGLEC15+ mac	0.824857	1.44892	5.28067e-119
LPXN	cDC2	0.47657	0.161262	0.336474	0.177449	tissue-repair mac cycling	0.824024	1.72907	2.77361e-109
C12orf45	cDC2	0.477567	0.166334	0.611111	0.182311	pDC prec	0.812838	1.70204	2.4537e-105
MNDA	cDC2	0.676969	0.281899	0.88006	0.30218	mono	0.81015	1.19673	5.7918e-137
LYZ	cDC2	0.775673	0.330941	0.991254	0.353772	NMP	0.806004	1.0391	2.34091e-170
CD33	cDC2	0.635095	0.261937	0.513678	0.281093	SIGLEC15+ mac	0.805979	1.26907	8.7527e-125
CACNA2D3	cDC2	0.325025	0.0709469	0.231494	0.0839902	tissue-repair mac cycling	0.805105	2.47706	5.59829e-111
TMEM109	cDC2	0.527418	0.201133	0.547445	0.217883	MEMP	0.803677	1.5238	4.90353e-106
WARS	cDC2	0.482552	0.173294	0.574648	0.18917	ifn-induced mac	0.803503	1.66511	2.54877e-102
CX3CR1	cDC2	0.463609	0.161424	0.765324	0.176937	microglia-like mac	0.802953	1.73196	2.84564e-101
MSLN	cDC2	0.239282	0.0241705	0.0759878	0.0352134	SIGLEC15+ mac	0.800717	3.34633	1.19832e-136
TNFSF13B	cDC2	0.625125	0.259077	0.650704	0.277869	ifn-induced mac	0.800539	1.28061	1.27213e-120
SCIMP	cDC2	0.465603	0.164014	0.422535	0.179496	ifn-induced mac	0.79972	1.7176	3.3089e-100
NAAA	cDC2	0.463609	0.163798	0.374648	0.179189	ifn-induced mac	0.797089	1.71931	3.26065e-99
HACD4	cDC2	0.632104	0.26485	0.504711	0.283704	tissue-repair mac cycling	0.79634	1.25983	1.19145e-120
PLBD1	cDC2	0.471585	0.169895	0.575337	0.185382	mono	0.794779	1.68533	1.00527e-98
AL138899.1	cDC2	0.210369	0.0129485	0.0820996	0.0230832	tissue-repair mac cycling	0.792807	3.76865	2.45109e-150
YIF1A	cDC2	0.530409	0.207985	0.568389	0.224537	SIGLEC15+ mac	0.79228	1.49372	2.09821e-102
ANXA1	cDC2	0.866401	0.375883	0.981763	0.401065	SIGLEC15+ mac	0.791572	0.913633	5.62268e-213
YIF1B	cDC2	0.747757	0.325708	0.781022	0.347374	MEMP	0.790642	1.05735	4.75963e-153
CD1E	cDC2	0.196411	0.0082007	0.0659489	0.0178626	tissue-repair mac cycling	0.790562	4.02504	8.46406e-161
C20orf27	cDC2	0.805583	0.35317	0.734694	0.376395	NMP	0.787149	0.977117	8.53919e-177
UNC119	cDC2	0.545364	0.219639	0.513678	0.23636	SIGLEC15+ mac	0.786633	1.4424	3.23664e-102
RAB32	cDC2	0.754736	0.331643	0.644315	0.353363	NMP	0.785122	1.04026	1.21932e-153
DUSP23	cDC2	0.577268	0.24014	0.682482	0.257447	MEMP	0.783319	1.35694	1.32924e-105
DPYSL2	cDC2	0.489531	0.18635	0.40646	0.201914	tissue-repair mac cycling	0.783207	1.59991	1.02509e-95
IGFLR1	cDC2	0.445663	0.158943	0.5	0.173662	pDC prec	0.780199	1.75065	7.013e-93
IFI30	cDC2	0.508475	0.201349	0.620061	0.217115	SIGLEC15+ mac	0.776607	1.52733	6.70776e-95
CYP2S1	cDC2	0.261216	0.0399784	0.131898	0.0513359	tissue-repair mac cycling	0.775647	2.96937	6.88333e-116
FGL2	cDC2	0.815553	0.363259	0.808451	0.386478	ifn-induced mac	0.775331	0.950681	4.31131e-177
CAPG	cDC2	0.675972	0.298301	0.835866	0.317689	SIGLEC15+ mac	0.775126	1.14668	5.94901e-124
RTN1	cDC2	0.384845	0.120691	0.347241	0.134251	tissue-repair mac cycling	0.772786	2.00804	1.17226e-91
AC098613.1	cDC2	0.400798	0.132344	0.388889	0.146125	pDC prec	0.77085	1.92329	3.77539e-90
CIITA	cDC2	0.421735	0.146911	0.453521	0.16102	ifn-induced mac	0.770185	1.82623	2.22908e-89
MTHFD2	cDC2	0.672981	0.299541	0.839416	0.318712	MEMP	0.769531	1.14347	3.90282e-121
TIFAB	cDC2	0.256231	0.0391152	0.215278	0.050261	pDC prec	0.766266	2.99053	1.16881e-113
FAM162A	cDC2	0.684945	0.307472	0.857143	0.32685	SIGLEC15+ mac	0.765942	1.11825	3.75144e-123
SULF2	cDC2	0.293121	0.0616132	0.472222	0.0734978	pDC prec	0.765191	2.6105	4.66772e-102
OTULINL	cDC2	0.578265	0.249852	0.524899	0.266711	tissue-repair mac cycling	0.764229	1.32159	3.06977e-99
CLEC7A	cDC2	0.724826	0.329323	0.647887	0.349626	ifn-induced mac	0.761712	1.05089	5.02683e-134
PCBD1	cDC2	0.594217	0.261289	0.914894	0.278381	SIGLEC15+ mac	0.759865	1.27877	2.01339e-100
C19orf38	cDC2	0.54337	0.231184	0.705772	0.247211	mono	0.759367	1.39751	1.02604e-92
ETHE1	cDC2	0.619143	0.276126	0.613139	0.293735	MEMP	0.758497	1.22508	1.22793e-104
HLA-DMB	cDC2	0.824526	0.375937	0.794366	0.398966	ifn-induced mac	0.75764	0.918879	9.73279e-175
SUSD3	cDC2	0.587238	0.258754	0.503365	0.275617	tissue-repair mac cycling	0.7568	1.28874	3.43504e-98
IAH1	cDC2	0.547358	0.235339	0.693009	0.251356	SIGLEC15+ mac	0.755838	1.38088	5.03113e-92
ENTPD1	cDC2	0.443669	0.167953	0.534151	0.182107	microglia-like mac	0.75564	1.70316	1.86854e-84
PLAC8	cDC2	0.554337	0.239817	0.951389	0.255963	pDC prec	0.755408	1.36272	8.6826e-93
CDK2AP1	cDC2	0.52343	0.221581	0.656934	0.237076	MEMP	0.75341	1.43937	1.66771e-88
TIMM17A	cDC2	0.541376	0.233936	0.79927	0.249718	MEMP	0.751116	1.38742	1.01868e-89
ELOVL1	cDC2	0.588235	0.262315	0.753799	0.279046	SIGLEC15+ mac	0.750811	1.27638	2.40796e-96
MTCH2	cDC2	0.621137	0.281467	0.762774	0.298905	MEMP	0.750103	1.20763	3.5019e-102
EXOSC5	cDC2	0.409771	0.147505	0.675182	0.160968	MEMP	0.748466	1.82655	3.87219e-82
DAPP1	cDC2	0.347956	0.105098	0.318584	0.117566	mega	0.74489	2.14076	5.90539e-85
MYD88	cDC2	0.435693	0.167683	0.354167	0.181441	pDC prec	0.743651	1.70682	2.42064e-80
MRPL4	cDC2	0.544367	0.239709	0.839416	0.255349	MEMP	0.743129	1.36513	1.9461e-87
PPT1	cDC2	0.748754	0.350796	0.778116	0.371225	SIGLEC15+ mac	0.741975	0.990946	3.16175e-135
MRPS12	cDC2	0.49651	0.210251	0.733577	0.224946	MEMP	0.740741	1.49189	5.87199e-82
ARL5A	cDC2	0.547358	0.243539	0.718978	0.259136	MEMP	0.739153	1.3504	1.70078e-86
MRPL15	cDC2	0.469591	0.194119	0.762918	0.208261	SIGLEC15+ mac	0.736772	1.56896	4.84928e-79
PDCL3	cDC2	0.491525	0.208956	0.580292	0.223462	MEMP	0.736558	1.49851	3.11261e-80
TNNI2	cDC2	0.377866	0.129808	0.6875	0.142543	pDC prec	0.736127	1.94811	2.62587e-79
DHRS4	cDC2	0.479561	0.201187	0.452888	0.215478	SIGLEC15+ mac	0.736078	1.5349	2.49762e-79
DSE	cDC2	0.430708	0.167575	0.343203	0.181083	tissue-repair mac cycling	0.735993	1.7088	8.70414e-78
MRPL3	cDC2	0.506481	0.219153	0.79927	0.233903	MEMP	0.735839	1.45285	3.82091e-81
UCHL3	cDC2	0.437687	0.172754	0.591241	0.186355	MEMP	0.735359	1.6801	1.22401e-77
LYVE1	tissue-repair mac	0.799738	0.0875147	0.535666	0.365288	tissue-repair mac cycling	0.805391	1.00707	0
LILRB5	tissue-repair mac	0.534514	0.0296191	0.270423	0.226533	ifn-induced mac	0.793682	1.48487	0
SELENOP	tissue-repair mac	0.846194	0.120574	0.532394	0.403573	ifn-induced mac	0.767836	0.907399	0
F13A1	tissue-repair mac	0.741732	0.109582	0.663717	0.356127	mega	0.765816	1.03247	0
SLCO2B1	tissue-repair mac	0.64357	0.105722	0.556918	0.315488	microglia-like mac	0.742445	1.15364	0
NRP1	tissue-repair mac	0.599344	0.0934721	0.434724	0.290767	tissue-repair mac cycling	0.74033	1.23523	0
MRC1	tissue-repair mac	0.821391	0.148431	0.647887	0.410892	ifn-induced mac	0.730566	0.889426	0
CTSL	tissue-repair mac	0.716535	0.134167	0.602817	0.361296	ifn-induced mac	0.729475	1.01806	0
CD163	tissue-repair mac	0.755643	0.145326	0.574648	0.383356	ifn-induced mac	0.724505	0.958792	0
MS4A4A	tissue-repair mac	0.818241	0.153381	0.647376	0.412683	tissue-repair mac cycling	0.724206	0.885076	0
A2M	tissue-repair mac	0.822178	0.157661	0.868651	0.416829	microglia-like mac	0.719472	0.87508	0
C1QB	tissue-repair mac	0.938058	0.176708	0.943662	0.473641	ifn-induced mac	0.701016	0.747305	0
FOLR2	tissue-repair mac	0.906693	0.17805	0.808451	0.462227	ifn-induced mac	0.699693	0.771698	0
GAS6	tissue-repair mac	0.530577	0.106645	0.432032	0.271983	tissue-repair mac cycling	0.690821	1.30202	0
DAB2	tissue-repair mac	0.908793	0.187364	0.759085	0.468728	tissue-repair mac cycling	0.688623	0.757733	0
PLTP	tissue-repair mac	0.561942	0.124853	0.452555	0.295322	MEMP	0.685395	1.21969	0
C1QA	tissue-repair mac	0.966273	0.189042	0.952113	0.492169	ifn-induced mac	0.685023	0.708933	0
STAB1	tissue-repair mac	0.8521	0.190216	0.66218	0.448357	tissue-repair mac cycling	0.683525	0.802165	0
VSIG4	tissue-repair mac	0.499738	0.100856	0.521891	0.256423	microglia-like mac	0.680105	1.36093	0
RNASE1	tissue-repair mac	0.930709	0.203642	0.789842	0.487204	microglia-like mac	0.669246	0.719071	0
SPP1	tissue-repair mac	0.620604	0.162611	0.899696	0.341232	SIGLEC15+ mac	0.667268	1.07519	0
C1QC	tissue-repair mac	0.976247	0.204061	0.974648	0.505221	ifn-induced mac	0.666542	0.68276	0
NPL	tissue-repair mac	0.501706	0.114365	0.504225	0.265431	ifn-induced mac	0.665462	1.3264	0
AGR2	tissue-repair mac	0.47874	0.107233	0.656797	0.252124	tissue-repair mac cycling	0.659624	1.37783	0
CD28	tissue-repair mac	0.449081	0.0915422	0.344549	0.230986	tissue-repair mac cycling	0.658083	1.4654	0
GATM	tissue-repair mac	0.658268	0.182413	0.690141	0.368001	ifn-induced mac	0.658051	0.99967	0
EGFL7	tissue-repair mac	0.661417	0.185014	0.79562	0.370816	MEMP	0.656159	0.99205	0
MS4A7	tissue-repair mac	0.869291	0.215305	0.805634	0.470365	ifn-induced mac	0.655659	0.754245	0
RGL1	tissue-repair mac	0.394619	0.0644403	0.298592	0.193213	ifn-induced mac	0.648739	1.64396	0
SLC40A1	tissue-repair mac	0.695932	0.200621	0.718978	0.393797	MEMP	0.648553	0.93192	0
CCL2	tissue-repair mac	0.399475	0.0683001	0.315493	0.197461	ifn-induced mac	0.648033	1.62221	0
ADAP2	tissue-repair mac	0.673885	0.198104	0.691769	0.383663	microglia-like mac	0.645576	0.957992	0
TTYH3	tissue-repair mac	0.537533	0.15078	0.43607	0.301617	tissue-repair mac cycling	0.644285	1.1986	0
SLC7A8	tissue-repair mac	0.360236	0.0438832	0.207268	0.167264	tissue-repair mac cycling	0.644168	1.78818	0
MSR1	tissue-repair mac	0.392257	0.0688874	0.391549	0.195005	ifn-induced mac	0.641235	1.63473	0
LGMN	tissue-repair mac	0.885433	0.230576	0.8	0.485976	ifn-induced mac	0.638925	0.721596	0
GPR34	tissue-repair mac	0.532808	0.154724	0.735552	0.30218	microglia-like mac	0.637628	1.19673	0
WWP1	tissue-repair mac	0.450262	0.113945	0.347241	0.245112	tissue-repair mac cycling	0.633087	1.40604	0
MAFB	tissue-repair mac	0.531496	0.159758	0.569014	0.304739	ifn-induced mac	0.631576	1.1883	0
MCOLN1	tissue-repair mac	0.468504	0.126615	0.31831	0.259955	ifn-induced mac	0.63119	1.34725	0
LY96	tissue-repair mac	0.616273	0.200034	0.778116	0.362371	SIGLEC15+ mac	0.625571	1.01509	0
LPAR6	tissue-repair mac	0.595538	0.193321	0.630986	0.350189	ifn-induced mac	0.624887	1.04928	0
HMOX1	tissue-repair mac	0.713255	0.22873	0.739054	0.417699	microglia-like mac	0.622667	0.872995	0
ABCA1	tissue-repair mac	0.398425	0.0914583	0.253521	0.211178	ifn-induced mac	0.619572	1.55505	0
CXCL16	tissue-repair mac	0.583727	0.197516	0.659155	0.348142	ifn-induced mac	0.615916	1.05514	0
MAN1A1	tissue-repair mac	0.45	0.130727	0.333333	0.255246	pDC prec	0.614487	1.36553	0
FSCN1	tissue-repair mac	0.643045	0.220591	0.728546	0.385352	microglia-like mac	0.613207	0.953599	0
ATP1B1	tissue-repair mac	0.463123	0.142557	0.456338	0.267581	ifn-induced mac	0.610551	1.31833	0
NRP2	tissue-repair mac	0.377034	0.0844101	0.820669	0.198536	SIGLEC15+ mac	0.609583	1.61678	0
MAF	tissue-repair mac	0.817323	0.258433	0.730821	0.476405	tissue-repair mac cycling	0.606034	0.741487	0
SLC9A9	tissue-repair mac	0.423097	0.121329	0.411268	0.239021	ifn-induced mac	0.605538	1.4312	0
PLXND1	tissue-repair mac	0.40748	0.110757	0.416413	0.226482	SIGLEC15+ mac	0.605145	1.48509	0
HPGDS	tissue-repair mac	0.533727	0.188454	0.78673	0.323114	mast	0.602978	1.12975	0
ITSN1	tissue-repair mac	0.338845	0.0622588	0.265141	0.17013	tissue-repair mac cycling	0.60016	1.77119	0
CD36	tissue-repair mac	0.72874	0.256419	0.718708	0.440629	tissue-repair mac cycling	0.597241	0.819553	0
TGFBI	tissue-repair mac	0.574672	0.212955	0.722222	0.354028	pDC prec	0.596727	1.03838	0
CYFIP1	tissue-repair mac	0.518504	0.187448	0.635258	0.316563	SIGLEC15+ mac	0.596401	1.15023	0
EPB41L3	tissue-repair mac	0.397244	0.119064	0.459155	0.227557	ifn-induced mac	0.588063	1.48036	0
LRP1	tissue-repair mac	0.449869	0.158919	0.428571	0.272392	SIGLEC15+ mac	0.58506	1.30051	0
IDH1	tissue-repair mac	0.454724	0.163702	0.580547	0.277203	SIGLEC15+ mac	0.583413	1.283	0
AP2A2	tissue-repair mac	0.412073	0.134502	0.358008	0.242758	tissue-repair mac cycling	0.583369	1.41569	0
LIPA	tissue-repair mac	0.507612	0.195167	0.597183	0.317023	ifn-induced mac	0.583134	1.14878	0
OTUD1	tissue-repair mac	0.369423	0.102114	0.28169	0.206367	ifn-induced mac	0.582985	1.5781	0
CD163L1	tissue-repair mac	0.280709	0.0263467	0.261398	0.12555	SIGLEC15+ mac	0.582484	2.07505	0
MTSS1	tissue-repair mac	0.438058	0.153969	0.598784	0.264766	SIGLEC15+ mac	0.582139	1.32891	0
C3AR1	tissue-repair mac	0.501181	0.194328	0.560563	0.314003	ifn-induced mac	0.580544	1.15835	0
CXCL8	tissue-repair mac	0.419948	0.144991	0.374408	0.252226	mast	0.578447	1.37743	0
BLVRA	tissue-repair mac	0.367585	0.105051	0.470803	0.207442	MEMP	0.578176	1.5729	0
IGF1	tissue-repair mac	0.304199	0.0510992	0.502627	0.149811	microglia-like mac	0.577487	1.89838	0
ARHGAP18	tissue-repair mac	0.583202	0.237204	0.74772	0.372147	SIGLEC15+ mac	0.576476	0.988467	0
COLEC12	tissue-repair mac	0.272703	0.0236617	0.17362	0.12079	tissue-repair mac cycling	0.576413	2.1137	0
CD14	tissue-repair mac	0.884383	0.28931	0.814085	0.521394	ifn-induced mac	0.575954	0.651249	0
RAB3IL1	tissue-repair mac	0.299738	0.0487498	0.2662	0.146637	microglia-like mac	0.575434	1.91979	0
CCL3	tissue-repair mac	0.61811	0.251133	0.676985	0.394257	NK	0.575307	0.930751	0
CD4	tissue-repair mac	0.581627	0.239386	0.835866	0.372863	SIGLEC15+ mac	0.573801	0.986544	0
TIMP2	tissue-repair mac	0.539895	0.221262	0.711246	0.345532	SIGLEC15+ mac	0.573731	1.06267	0
SPRED1	tissue-repair mac	0.351837	0.0983386	0.610942	0.197205	SIGLEC15+ mac	0.571211	1.62351	0
LTC4S	tissue-repair mac	0.387402	0.127958	0.668246	0.229143	mast	0.570801	1.47341	0
C5AR1	tissue-repair mac	0.55105	0.229569	0.628936	0.354949	mono	0.570767	1.03578	0
USP36	tissue-repair mac	0.43622	0.165967	0.277254	0.271369	tissue-repair mac cycling	0.568952	1.30428	0
TSPAN4	tissue-repair mac	0.425066	0.158835	0.726444	0.262668	SIGLEC15+ mac	0.568256	1.33687	0
KLF4	tissue-repair mac	0.491601	0.202551	0.492522	0.315283	cDC2	0.567447	1.15428	0
ITPR2	tissue-repair mac	0.501312	0.209179	0.491252	0.323114	tissue-repair mac cycling	0.566358	1.12975	0
RENBP	tissue-repair mac	0.393176	0.141467	0.486322	0.239636	SIGLEC15+ mac	0.561705	1.42864	0
APOE	tissue-repair mac	0.349081	0.104799	0.857143	0.200072	SIGLEC15+ mac	0.5617	1.60908	0
CREG1	tissue-repair mac	0.714567	0.291576	0.686131	0.456546	MEMP	0.560267	0.784065	0
SGK1	tissue-repair mac	0.605906	0.264222	0.570289	0.397482	cDC2	0.559012	0.922606	0
NAIP	tissue-repair mac	0.581627	0.255244	0.570659	0.382537	tissue-repair mac cycling	0.558904	0.960931	0
SIGLEC1	tissue-repair mac	0.259449	0.0244168	0.214085	0.116081	ifn-induced mac	0.558713	2.15346	0
HES1	tissue-repair mac	0.370604	0.126531	0.313869	0.221722	MEMP	0.558252	1.50633	0
RAB20	tissue-repair mac	0.485433	0.208844	0.538028	0.316716	ifn-induced mac	0.558126	1.14975	0
FCGR2A	tissue-repair mac	0.698031	0.290653	0.712676	0.449534	ifn-induced mac	0.558106	0.799543	0
HBEGF	tissue-repair mac	0.479921	0.20641	0.425037	0.313082	mono	0.557328	1.16129	0
MKNK1	tissue-repair mac	0.438189	0.181155	0.513135	0.2814	microglia-like mac	0.555613	1.26798	0
GPR183	tissue-repair mac	0.619948	0.274207	0.743056	0.409049	pDC prec	0.554184	0.89392	0
SESN1	tissue-repair mac	0.430052	0.178386	0.379542	0.276538	tissue-repair mac cycling	0.552792	1.28541	5.14611e-315
FRMD4A	tissue-repair mac	0.30105	0.0703138	0.329247	0.160303	microglia-like mac	0.551129	1.83069	0
CD86	tissue-repair mac	0.524278	0.238127	0.680957	0.349729	cDC2	0.550805	1.0506	0
ATF3	tissue-repair mac	0.634514	0.283437	0.596211	0.42036	cDC2	0.549898	0.866643	0
TLR4	tissue-repair mac	0.335696	0.105471	0.355316	0.195261	tissue-repair mac cycling	0.548332	1.63342	0
MKI67	tissue-repair mac cycling	0.846568	0.0712424	0.363547	0.100727	pro-B	1.94316	2.29534	0
UBE2C	tissue-repair mac cycling	0.794078	0.0684757	0.405109	0.0960692	MEMP	1.86028	2.34269	0
TOP2A	tissue-repair mac cycling	0.799462	0.0767225	0.350739	0.104207	pro-B	1.80788	2.26137	0
CDK1	tissue-repair mac cycling	0.729475	0.0646449	0.361576	0.0899273	pro-B	1.75713	2.40875	0
NUSAP1	tissue-repair mac cycling	0.745626	0.0709763	0.403941	0.0966322	pro-B	1.74241	2.33684	0
TPX2	tissue-repair mac cycling	0.679677	0.0545358	0.346715	0.0783089	MEMP	1.7312	2.54709	0
CENPF	tissue-repair mac cycling	0.777927	0.08332	0.419708	0.109735	MEMP	1.71898	2.20969	0
BIRC5	tissue-repair mac cycling	0.706595	0.0656026	0.363547	0.0899785	pro-B	1.70161	2.40818	0
AURKB	tissue-repair mac cycling	0.636608	0.0496409	0.331034	0.0719623	pro-B	1.67531	2.63161	0
GTSE1	tissue-repair mac cycling	0.574697	0.0348497	0.232512	0.0553793	pro-B	1.66292	2.89355	0
HMMR	tissue-repair mac cycling	0.573351	0.0352221	0.22266	0.0556864	pro-B	1.65585	2.88802	0
ASPM	tissue-repair mac cycling	0.578735	0.0390529	0.221675	0.0595762	pro-B	1.63232	2.8205	0
CDC20	tissue-repair mac cycling	0.608345	0.0511306	0.313869	0.0723206	MEMP	1.59791	2.62665	0
CCNB2	tissue-repair mac cycling	0.636608	0.060016	0.354015	0.0819429	MEMP	1.59262	2.50173	0
CDKN3	tissue-repair mac cycling	0.606999	0.0544294	0.292611	0.0754427	pro-B	1.56872	2.58438	0
CCNB1	tissue-repair mac cycling	0.58681	0.0517691	0.266423	0.0721159	MEMP	1.54301	2.62948	7.92969e-316
CCNA2	tissue-repair mac cycling	0.537012	0.0419792	0.28867	0.0608046	pro-B	1.50368	2.80009	4.78723e-299
CDCA3	tissue-repair mac cycling	0.508748	0.0341048	0.256158	0.0521548	pro-B	1.50261	2.95354	3.45803e-299
PLK1	tissue-repair mac cycling	0.496635	0.0328811	0.196059	0.0505169	pro-B	1.48268	2.98545	3.06931e-292
CDCA8	tissue-repair mac cycling	0.519515	0.04166	0.278818	0.0598321	pro-B	1.46307	2.81621	5.9435e-284
NCAPG	tissue-repair mac cycling	0.51144	0.0405959	0.256158	0.0585014	pro-B	1.45183	2.8387	6.33332e-280
NCAPH	tissue-repair mac cycling	0.471063	0.0311785	0.226277	0.0479066	MEMP	1.43133	3.0385	1.30384e-274
KIF11	tissue-repair mac cycling	0.469717	0.031817	0.188177	0.0484696	pro-B	1.42175	3.02682	4.43454e-271
KNL1	tissue-repair mac cycling	0.489906	0.0383613	0.242365	0.0555328	pro-B	1.41621	2.89078	1.67476e-267
KIFC1	tissue-repair mac cycling	0.503365	0.0427773	0.251232	0.0602928	pro-B	1.41372	2.80854	4.22805e-266
PTTG1	tissue-repair mac cycling	0.79677	0.151157	0.686131	0.175709	MEMP	1.38552	1.73893	2.14818e-313
NDC80	tissue-repair mac cycling	0.454913	0.0321362	0.24335	0.0482137	pro-B	1.37935	3.03211	1.54173e-256
ANLN	tissue-repair mac cycling	0.434724	0.0275073	0.165517	0.0429931	pro-B	1.36795	3.14671	7.3955e-255
CENPM	tissue-repair mac cycling	0.60969	0.086406	0.485401	0.106306	MEMP	1.36658	2.24144	1.54173e-256
TYMS	tissue-repair mac cycling	0.678331	0.113062	0.740876	0.134558	MEMP	1.36057	2.00576	1.78274e-267
DLGAP5	tissue-repair mac cycling	0.430686	0.027933	0.208867	0.0432491	pro-B	1.35269	3.14078	1.35185e-249
TK1	tissue-repair mac cycling	0.576043	0.0766161	0.372263	0.0956086	MEMP	1.35226	2.34749	1.40796e-247
CENPE	tissue-repair mac cycling	0.471063	0.0403831	0.200985	0.0567612	pro-B	1.35143	2.8689	8.40561e-245
CEP55	tissue-repair mac cycling	0.429341	0.0304868	0.166502	0.0456546	pro-B	1.32522	3.08665	2.42715e-239
NUF2	tissue-repair mac cycling	0.438762	0.0348497	0.244335	0.0502098	pro-B	1.31258	2.99154	2.07753e-233
CKS1B	tissue-repair mac cycling	0.838493	0.184304	0.70438	0.209182	MEMP	1.31186	1.56455	1.71565e-307
TROAP	tissue-repair mac cycling	0.457604	0.0412876	0.211679	0.0571195	MEMP	1.30994	2.86261	1.03758e-230
PRC1	tissue-repair mac cycling	0.448183	0.0383613	0.189781	0.0539462	MEMP	1.30859	2.91977	5.54622e-231
HIST1H3B	tissue-repair mac cycling	0.450875	0.0397446	0.244526	0.0553793	MEMP	1.30463	2.89355	2.40533e-229
ZWINT	tissue-repair mac cycling	0.572005	0.0838521	0.485401	0.102416	MEMP	1.30344	2.27871	1.00195e-230
HIST1H1B	tissue-repair mac cycling	0.495289	0.0553339	0.281022	0.0720647	MEMP	1.30271	2.63019	1.02024e-226
MAD2L1	tissue-repair mac cycling	0.553163	0.0773078	0.580292	0.0954038	MEMP	1.29973	2.34964	7.86229e-228
CENPA	tissue-repair mac cycling	0.41319	0.0292099	0.194089	0.0438121	pro-B	1.29239	3.12785	1.78874e-229
RAD51AP1	tissue-repair mac cycling	0.504711	0.0625698	0.29562	0.0793838	MEMP	1.27866	2.53346	1.6129e-218
NCAPD2	tissue-repair mac cycling	0.569314	0.0876829	0.313869	0.105999	MEMP	1.27773	2.24433	5.78963e-222
SMC4	tissue-repair mac cycling	0.76716	0.167332	0.529197	0.190142	MEMP	1.27347	1.65998	4.90801e-265
KIF2C	tissue-repair mac cycling	0.401077	0.0285714	0.170443	0.0427372	pro-B	1.26447	3.15268	4.22442e-221
FOXM1	tissue-repair mac cycling	0.394347	0.026656	0.154519	0.0406388	NMP	1.26311	3.20303	7.52483e-222
SMC2	tissue-repair mac cycling	0.654105	0.127428	0.536496	0.147456	MEMP	1.2521	1.91422	1.1538e-226
DTYMK	tissue-repair mac cycling	0.689098	0.148976	0.60219	0.169516	MEMP	1.22302	1.77481	2.70923e-225
CENPN	tissue-repair mac cycling	0.496635	0.0702314	0.375912	0.0864469	MEMP	1.21587	2.44822	2.81889e-197
GGH	tissue-repair mac cycling	0.492598	0.0694334	0.481752	0.0855256	MEMP	1.21127	2.45894	1.02231e-195
CENPU	tissue-repair mac cycling	0.539704	0.0891194	0.620438	0.106254	MEMP	1.20997	2.24192	3.18929e-197
PCLAF	tissue-repair mac cycling	0.537012	0.0883746	0.689781	0.105436	MEMP	1.20809	2.24966	1.98063e-196
CENPK	tissue-repair mac cycling	0.535666	0.0886938	0.514599	0.105691	MEMP	1.20377	2.24723	5.90389e-195
ASF1B	tissue-repair mac cycling	0.476447	0.0643788	0.312315	0.0800491	pro-B	1.20308	2.52511	4.82884e-193
HMGB3	tissue-repair mac cycling	0.624495	0.127161	0.682482	0.146074	MEMP	1.2013	1.92364	8.57996e-205
CKAP2	tissue-repair mac cycling	0.598923	0.116574	0.416058	0.134917	MEMP	1.1997	2.0031	2.89435e-200
SPAG5	tissue-repair mac cycling	0.419919	0.0431498	0.162562	0.0574777	pro-B	1.19944	2.85636	5.90389e-195
CKAP2L	tissue-repair mac cycling	0.370121	0.026656	0.214778	0.0397175	pro-B	1.194	3.22596	7.91311e-201
TACC3	tissue-repair mac cycling	0.628533	0.133174	0.390511	0.152011	MEMP	1.18403	1.8838	4.88661e-200
SGO1	tissue-repair mac cycling	0.401077	0.0385209	0.273723	0.0523083	MEMP	1.18342	2.9506	1.27839e-191
SPC25	tissue-repair mac cycling	0.382234	0.0324022	0.270073	0.0457058	MEMP	1.1794	3.08553	4.03157e-193
RRM2	tissue-repair mac cycling	0.41319	0.0443203	0.276847	0.0583478	pro-B	1.17401	2.84133	7.19472e-187
KIF4A	tissue-repair mac cycling	0.344549	0.0210162	0.139901	0.0333197	pro-B	1.17202	3.40161	5.92808e-199
CENPW	tissue-repair mac cycling	0.637954	0.142272	0.631387	0.161122	MEMP	1.16465	1.82559	1.07826e-195
KIF23	tissue-repair mac cycling	0.340511	0.0212823	0.146798	0.033422	pro-B	1.15724	3.39854	1.85144e-194
HJURP	tissue-repair mac cycling	0.356662	0.0268156	0.20197	0.0393592	pro-B	1.15381	3.23503	5.29322e-189
RACGAP1	tissue-repair mac cycling	0.414536	0.0485767	0.22069	0.0624936	pro-B	1.14938	2.77269	2.68565e-178
CDCA5	tissue-repair mac cycling	0.384926	0.0372972	0.266423	0.0505169	MEMP	1.14918	2.98545	6.35793e-182
CIT	tissue-repair mac cycling	0.335128	0.0205906	0.113139	0.032552	MEMP	1.14779	3.42492	2.0549e-192
LMNB1	tissue-repair mac cycling	0.655451	0.157329	0.576642	0.176272	MEMP	1.13768	1.73573	8.64554e-191
PHF19	tissue-repair mac cycling	0.589502	0.127694	0.572993	0.145255	MEMP	1.1373	1.92926	2.02197e-179
MND1	tissue-repair mac cycling	0.426649	0.056398	0.373399	0.070478	pro-B	1.13167	2.65245	2.40126e-171
KIF22	tissue-repair mac cycling	0.625841	0.14589	0.510949	0.164142	MEMP	1.13091	1.80703	4.82025e-183
BUB1	tissue-repair mac cycling	0.351279	0.0278265	0.189781	0.0401269	MEMP	1.12961	3.21571	2.32904e-181
DEPDC1	tissue-repair mac cycling	0.324361	0.0194201	0.145985	0.0310165	MEMP	1.12658	3.47324	1.42281e-187
SGO2	tissue-repair mac cycling	0.395693	0.0447459	0.266423	0.0580919	MEMP	1.12604	2.84573	2.0646e-172
KIF20A	tissue-repair mac cycling	0.320323	0.0183027	0.146798	0.0297881	pro-B	1.1255	3.51365	1.75603e-188
CDCA2	tissue-repair mac cycling	0.335128	0.0241022	0.197044	0.03593	pro-B	1.1147	3.32618	6.8799e-180
ARHGAP11A	tissue-repair mac cycling	0.343203	0.0277201	0.186131	0.0397175	MEMP	1.10716	3.22596	4.5963e-175
RPL39L	tissue-repair mac cycling	0.504711	0.0967279	0.314869	0.112243	NMP	1.10385	2.18709	1.5775e-161
UBE2T	tissue-repair mac cycling	0.460296	0.0781059	0.540146	0.09264	MEMP	1.09506	2.37903	4.14918e-158
AURKA	tissue-repair mac cycling	0.374159	0.0418196	0.215328	0.054458	MEMP	1.08892	2.91033	1.0584e-162
KNSTRN	tissue-repair mac cycling	0.409152	0.0565044	0.29562	0.069915	MEMP	1.08854	2.66047	1.85074e-158
SHCBP1	tissue-repair mac cycling	0.356662	0.0355946	0.182482	0.0478043	MEMP	1.08448	3.04064	3.90172e-164
KIF15	tissue-repair mac cycling	0.328398	0.02639	0.193103	0.0378749	pro-B	1.075	3.27347	4.64801e-167
CKAP5	tissue-repair mac cycling	0.582773	0.142485	0.478102	0.159228	MEMP	1.0708	1.83742	3.85735e-158
CLSPN	tissue-repair mac cycling	0.427995	0.0687949	0.368613	0.0824547	MEMP	1.06806	2.49551	1.51952e-150
KIF20B	tissue-repair mac cycling	0.546433	0.128438	0.368613	0.144334	MEMP	1.05769	1.93562	3.55695e-150
DIAPH3	tissue-repair mac cycling	0.327052	0.0283054	0.181281	0.0396663	pro-B	1.05548	3.22725	2.32203e-160
APOBEC3B	tissue-repair mac cycling	0.305518	0.0209098	0.193431	0.031733	MEMP	1.05416	3.4504	5.1367e-166
H2AFX	tissue-repair mac cycling	0.752355	0.231125	0.693431	0.250947	MEMP	1.04014	1.38251	2.46423e-186
ATAD2	tissue-repair mac cycling	0.472409	0.0974195	0.394161	0.11168	MEMP	1.03558	2.19212	1.35388e-139
CIP2A	tissue-repair mac cycling	0.362046	0.0459697	0.237226	0.0579896	MEMP	1.03092	2.84749	5.10874e-145
MELK	tissue-repair mac cycling	0.302826	0.0228252	0.167883	0.0334732	MEMP	1.0287	3.39701	2.04299e-157
SKA2	tissue-repair mac cycling	0.590848	0.159298	0.587591	0.175709	MEMP	1.02744	1.73893	3.04278e-146
HIST1H2AG	tissue-repair mac cycling	0.411844	0.0707635	0.357664	0.0837343	MEMP	1.02142	2.48011	9.91233e-137
BUB1B	tissue-repair mac cycling	0.294751	0.0213355	0.135961	0.031733	pro-B	1.01701	3.4504	1.12564e-155
KIF18B	tissue-repair mac cycling	0.257066	0.00978984	0.0620438	0.0191934	MEMP	1.01623	3.95319	1.76383e-171
CXCL9	ifn-induced mac	0.470423	0.0108951	0.0408774	0.0192445	cDC2	1.85842	3.95053	3.05842e-197
CXCL10	ifn-induced mac	0.535211	0.0286712	0.0699865	0.0378749	tissue-repair mac cycling	1.752	3.27347	8.19946e-175
GBP1	ifn-induced mac	0.588732	0.0517646	0.0931759	0.0615211	tissue-repair mac	1.64161	2.78837	4.07706e-158
CXCL11	ifn-induced mac	0.329577	0.00338842	0.0109671	0.00931518	cDC2	1.54114	4.67611	1.08606e-159
IL4I1	ifn-induced mac	0.64507	0.102695	0.261216	0.11255	cDC2	1.40907	2.18436	6.29373e-126
SLAMF8	ifn-induced mac	0.470423	0.0645363	0.222333	0.0719111	cDC2	1.2383	2.63232	1.85539e-92
GBP4	ifn-induced mac	0.498592	0.0864307	0.221675	0.0939195	pro-B	1.17933	2.36532	5.1097e-84
STAT1	ifn-induced mac	0.785915	0.231716	0.358923	0.241785	cDC2	1.11577	1.41971	8.91005e-102
GBP2	ifn-induced mac	0.521127	0.123703	0.397906	0.130924	early T	1.05952	2.03314	9.00002e-68
HLA-DQA1	ifn-induced mac	0.923944	0.314289	0.85344	0.325366	cDC2	1.03741	1.1228	1.5142e-123
EBI3	ifn-induced mac	0.495775	0.120106	0.234383	0.126932	tissue-repair mac	1.02333	2.0641	4.13461e-62
SERPING1	ifn-induced mac	0.543662	0.162175	0.525547	0.169106	MEMP	0.966211	1.77723	3.77874e-56
HLA-DQA2	ifn-induced mac	0.707042	0.246677	0.694915	0.255041	cDC2	0.966052	1.36633	2.48763e-69
TAP1	ifn-induced mac	0.498592	0.139394	0.286649	0.145921	early T	0.959635	1.92469	9.693e-54
WARS	ifn-induced mac	0.574648	0.182036	0.482552	0.18917	cDC2	0.956852	1.66511	1.70134e-56
VAMP5	ifn-induced mac	0.630986	0.212688	0.426047	0.220289	early T	0.954566	1.51282	4.09051e-60
GBP5	ifn-induced mac	0.352113	0.0634416	0.348168	0.0686867	early T	0.943028	2.6782	2.43705e-53
EPSTI1	ifn-induced mac	0.549296	0.177084	0.354935	0.183847	cDC2	0.930316	1.69365	9.07329e-52
HLA-DQB1	ifn-induced mac	0.884507	0.343325	0.848455	0.353158	cDC2	0.92063	1.04084	1.30203e-94
ATF5	ifn-induced mac	0.630986	0.229474	0.478564	0.236769	cDC2	0.909042	1.44067	3.12512e-54
HLA-DOA	ifn-induced mac	0.397183	0.0993588	0.304088	0.10477	cDC2	0.89604	2.25599	2.64164e-45
TMEM176B	ifn-induced mac	0.557746	0.197206	0.613982	0.203757	SIGLEC15+ mac	0.887279	1.59083	1.02634e-46
CD40	ifn-induced mac	0.43662	0.128134	0.288967	0.133739	microglia-like mac	0.878419	2.01186	1.33031e-42
TMEM176A	ifn-induced mac	0.453521	0.141792	0.525836	0.147456	SIGLEC15+ mac	0.868141	1.91422	2.31626e-41
RARRES3	ifn-induced mac	0.661972	0.262368	0.828534	0.269628	early T	0.867653	1.31071	1.10406e-51
FCGR3A	ifn-induced mac	0.55493	0.206172	0.639229	0.212509	microglia-like mac	0.859459	1.54877	3.8587e-43
C1orf54	ifn-induced mac	0.352113	0.0849189	0.24924	0.0897738	SIGLEC15+ mac	0.848754	2.41046	1.17682e-40
APOL3	ifn-induced mac	0.290141	0.049523	0.113874	0.053895	early T	0.84742	2.92072	1.3809e-44
MT2A	ifn-induced mac	0.715493	0.303133	0.627737	0.310625	MEMP	0.836531	1.16917	2.54324e-53
TNFSF13B	ifn-induced mac	0.650704	0.270969	0.625125	0.277869	cDC2	0.833296	1.28061	2.39777e-46
CIITA	ifn-induced mac	0.453521	0.155607	0.421735	0.16102	cDC2	0.828234	1.82623	1.83143e-36
VCAM1	ifn-induced mac	0.256338	0.0370119	0.0746719	0.040997	tissue-repair mac	0.818809	3.19426	3.72456e-44
SECTM1	ifn-induced mac	0.394366	0.12902	0.255234	0.133842	cDC2	0.793109	2.0111	1.85249e-32
APOC1	ifn-induced mac	0.456338	0.174999	0.835866	0.180111	SIGLEC15+ mac	0.782248	1.71418	4.4895e-31
FGL2	ifn-induced mac	0.808451	0.378669	0.815553	0.386478	cDC2	0.768579	0.950681	1.5462e-57
PEA15	ifn-induced mac	0.478873	0.196997	0.578265	0.202119	cDC2	0.76567	1.5989	1.58568e-29
LAP3	ifn-induced mac	0.819718	0.386957	0.728814	0.39482	cDC2	0.761784	0.929324	1.44068e-58
CAMK2D	ifn-induced mac	0.383099	0.133243	0.345962	0.137783	cDC2	0.759331	1.98208	1.11449e-28
HLA-F	ifn-induced mac	0.425352	0.164469	0.414267	0.169209	early T	0.75569	1.77662	7.11591e-28
CTSH	ifn-induced mac	0.735211	0.354689	0.840479	0.361603	cDC2	0.747863	1.01721	1.77639e-44
SLC8A1	ifn-induced mac	0.388732	0.141896	0.345009	0.146381	microglia-like mac	0.746965	1.92154	3.56814e-27
ACP2	ifn-induced mac	0.4	0.152635	0.337386	0.15713	SIGLEC15+ mac	0.740273	1.85068	2.83031e-26
TNFSF10	ifn-induced mac	0.388732	0.145441	0.507109	0.149862	mast	0.73783	1.89804	3.78791e-26
SCPEP1	ifn-induced mac	0.521127	0.238701	0.430823	0.243833	microglia-like mac	0.735452	1.41127	2.55497e-27
FCGR1A	ifn-induced mac	0.467606	0.20294	0.597198	0.207749	microglia-like mac	0.734807	1.57142	6.3057e-26
HLA-DMB	ifn-induced mac	0.794366	0.391649	0.824526	0.398966	cDC2	0.729926	0.918879	2.7743e-50
SCIMP	ifn-induced mac	0.422535	0.174999	0.465603	0.179496	cDC2	0.725747	1.7176	1.377e-24
IGFLR1	ifn-induced mac	0.414085	0.169212	0.5	0.173662	pDC prec	0.724916	1.75065	1.61981e-24
ADA2	ifn-induced mac	0.535211	0.256738	0.459621	0.261798	cDC2	0.717282	1.34018	6.88351e-26
P2RY6	ifn-induced mac	0.332394	0.111818	0.398804	0.115826	cDC2	0.716533	2.15567	2.92391e-25
IFI44L	ifn-induced mac	0.205634	0.0275765	0.0572597	0.0308118	HSC/MPP	0.715577	3.47986	1.53944e-36
A2M	ifn-induced mac	0.814085	0.409477	0.868651	0.416829	microglia-like mac	0.712389	0.87508	3.64949e-51
ODF3B	ifn-induced mac	0.397183	0.164156	0.391825	0.16839	cDC2	0.707571	1.78147	9.39264e-23
TMEM51	ifn-induced mac	0.343662	0.12386	0.291793	0.127853	SIGLEC15+ mac	0.706868	2.05687	9.19808e-24
NRP2	ifn-induced mac	0.43662	0.19413	0.820669	0.198536	SIGLEC15+ mac	0.70592	1.61678	1.59455e-22
C1QB	ifn-induced mac	0.943662	0.464943	0.938058	0.473641	tissue-repair mac	0.705204	0.747305	1.66297e-80
CXCL12	ifn-induced mac	0.276056	0.0751707	0.169685	0.0788208	tissue-repair mac	0.701343	2.54058	1.16488e-26
PILRA	ifn-induced mac	0.51831	0.253975	0.673913	0.258778	mono	0.700644	1.35179	1.521e-23
RASSF4	ifn-induced mac	0.605634	0.309128	0.683891	0.314515	SIGLEC15+ mac	0.70055	1.15672	1.54831e-27
VOPP1	ifn-induced mac	0.405634	0.173695	0.407777	0.17791	cDC2	0.700318	1.72648	6.38719e-22
LGALS3BP	ifn-induced mac	0.287324	0.0839806	0.224924	0.0876753	SIGLEC15+ mac	0.69938	2.43412	1.21015e-25
CXCL16	ifn-induced mac	0.659155	0.342386	0.583727	0.348142	tissue-repair mac	0.695504	1.05514	9.52904e-31
IFI6	ifn-induced mac	0.383099	0.159256	0.310902	0.163323	tissue-repair mac cycling	0.694185	1.81203	1.76448e-21
TFEC	ifn-induced mac	0.439437	0.203357	0.604863	0.207647	SIGLEC15+ mac	0.690758	1.57192	5.78689e-21
CREBL2	ifn-induced mac	0.439437	0.203566	0.422492	0.207851	SIGLEC15+ mac	0.690325	1.57093	6.38609e-21
GATM	ifn-induced mac	0.690141	0.362039	0.658268	0.368001	tissue-repair mac	0.689913	0.99967	9.13436e-33
LILRB1	ifn-induced mac	0.371831	0.152792	0.303598	0.156771	mono	0.68899	1.85297	4.1565e-21
IFIT3	ifn-induced mac	0.2	0.0288276	0.0740242	0.0319378	tissue-repair mac cycling	0.688793	3.44397	1.21478e-33
PSMB9	ifn-induced mac	0.738028	0.386905	0.671921	0.393285	pro-B	0.688743	0.933221	1.34898e-37
LIPA	ifn-induced mac	0.597183	0.311839	0.507612	0.317023	tissue-repair mac	0.686032	1.14878	1.64178e-25
OAS1	ifn-induced mac	0.397183	0.17552	0.402778	0.179548	pDC prec	0.682089	1.71732	4.73146e-20
LILRB2	ifn-induced mac	0.569014	0.296721	0.537106	0.301669	mono	0.681922	1.19843	1.27484e-23
DHRS9	ifn-induced mac	0.312676	0.10942	0.390511	0.113113	MEMP	0.681436	2.17937	3.74391e-22
CLEC7A	ifn-induced mac	0.647887	0.344107	0.724826	0.349626	cDC2	0.680858	1.05089	3.03805e-28
EPB41L3	ifn-induced mac	0.459155	0.223271	0.397244	0.227557	tissue-repair mac	0.679713	1.48036	4.94955e-20
LY96	ifn-induced mac	0.667606	0.356722	0.778116	0.362371	SIGLEC15+ mac	0.677678	1.01509	1.90722e-29
IGSF6	ifn-induced mac	0.68169	0.364959	0.72682	0.370713	cDC2	0.676459	0.992326	1.64761e-30
MAFB	ifn-induced mac	0.569014	0.299849	0.531496	0.304739	tissue-repair mac	0.676158	1.1883	5.00734e-23
CD4	ifn-induced mac	0.684507	0.367096	0.835866	0.372863	SIGLEC15+ mac	0.675296	0.986544	1.266e-30
C1QA	ifn-induced mac	0.952113	0.483657	0.966273	0.492169	tissue-repair mac	0.674984	0.708933	4.91593e-79
SAMD9L	ifn-induced mac	0.239437	0.0577595	0.1331	0.0610605	microglia-like mac	0.669438	2.79589	5.42023e-26
NPL	ifn-induced mac	0.504225	0.261012	0.501706	0.265431	tissue-repair mac	0.668804	1.3264	7.04221e-20
PLA2G16	ifn-induced mac	0.346479	0.141479	0.263743	0.145204	early T	0.668571	1.92961	1.66132e-19
TYMP	ifn-induced mac	0.876056	0.458792	0.830508	0.466373	cDC2	0.668229	0.762769	5.08136e-57
PARP14	ifn-induced mac	0.450704	0.222906	0.391655	0.227045	tissue-repair mac cycling	0.668218	1.48261	8.6967e-19
SERPINA1	ifn-induced mac	0.35493	0.148882	0.652549	0.152626	mono	0.667185	1.87977	3.74078e-19
C1QC	ifn-induced mac	0.974648	0.496533	0.976247	0.505221	tissue-repair mac	0.665451	0.68276	1.63881e-86
GIMAP4	ifn-induced mac	0.687324	0.374655	0.61296	0.380336	microglia-like mac	0.664437	0.966701	1.19323e-29
SLC40A1	ifn-induced mac	0.712676	0.387896	0.718978	0.393797	MEMP	0.664157	0.93192	5.21203e-32
LPAR6	ifn-induced mac	0.630986	0.344993	0.595538	0.350189	tissue-repair mac	0.662082	1.04928	4.52398e-25
CD86	ifn-induced mac	0.628169	0.344576	0.680957	0.349729	cDC2	0.659953	1.0506	1.18206e-24
IL18BP	ifn-induced mac	0.256338	0.0729292	0.217348	0.0762616	cDC2	0.659708	2.57359	2.96465e-23
NAGK	ifn-induced mac	0.588732	0.322786	0.54105	0.327618	tissue-repair mac cycling	0.656971	1.11591	4.78243e-22
MARCH1	ifn-induced mac	0.459155	0.235417	0.485543	0.239482	cDC2	0.65626	1.42928	1.01635e-17
IL13RA1	ifn-induced mac	0.397183	0.187927	0.531406	0.191729	cDC2	0.656016	1.65167	1.95408e-17
HLA-DRB5	ifn-induced mac	0.938028	0.489704	0.952144	0.49785	cDC2	0.654233	0.697456	3.33652e-71
ST8SIA4	ifn-induced mac	0.450704	0.231142	0.416413	0.235132	SIGLEC15+ mac	0.652444	1.44761	2.99747e-17
SNX10	ifn-induced mac	0.495775	0.26414	0.708207	0.268349	SIGLEC15+ mac	0.652175	1.31547	5.02497e-18
IFI35	ifn-induced mac	0.405634	0.196685	0.351279	0.200481	tissue-repair mac cycling	0.651868	1.60704	5.48105e-17
CASP1	ifn-induced mac	0.628169	0.349268	0.653041	0.354335	cDC2	0.651733	1.03751	8.38698e-24
OLFML3	microglia-like mac	0.723292	0.0330574	0.12786	0.0532296	tissue-repair mac cycling	2.12152	2.93314	0
C3	microglia-like mac	0.742557	0.0443402	0.146703	0.0647456	tissue-repair mac cycling	2.03259	2.73729	0
P2RY12	microglia-like mac	0.779335	0.058839	0.181696	0.0798956	tissue-repair mac cycling	1.96941	2.52703	0
HTRA1	microglia-like mac	0.486865	0.00854115	0.039031	0.0225202	tissue-repair mac cycling	1.84685	3.79334	0
AP003481.1	microglia-like mac	0.483363	0.0101756	0.0430686	0.0240045	tissue-repair mac cycling	1.80271	3.72951	0
TREM2	microglia-like mac	0.833625	0.123214	0.318977	0.143976	tissue-repair mac cycling	1.61566	1.93811	7.83337e-309
GAL3ST4	microglia-like mac	0.600701	0.0586281	0.145357	0.0744703	tissue-repair mac cycling	1.56023	2.59736	2.35038e-242
BHLHE41	microglia-like mac	0.495622	0.0463964	0.131898	0.059525	tissue-repair mac cycling	1.39833	2.82136	7.5909e-195
CX3CR1	microglia-like mac	0.765324	0.159224	0.46568	0.176937	tissue-repair mac cycling	1.32551	1.73196	1.4458e-212
CKB	microglia-like mac	0.443082	0.066273	0.705167	0.0772853	SIGLEC15+ mac	1.1344	2.56025	3.19622e-128
P2RY13	microglia-like mac	0.57268	0.12933	0.279946	0.142287	tissue-repair mac cycling	1.11667	1.94991	1.90215e-128
APOE	microglia-like mac	0.651489	0.186482	0.857143	0.200072	SIGLEC15+ mac	1.0483	1.60908	1.4613e-122
ADORA3	microglia-like mac	0.474606	0.100754	0.264789	0.11168	ifn-induced mac	1.04039	2.19212	6.59022e-106
DNASE2	microglia-like mac	0.357268	0.048558	0.111111	0.0575801	pDC prec	1.01985	2.85458	4.00432e-106
ACY3	microglia-like mac	0.49387	0.120631	0.543967	0.131539	HSC/MPP	1.00179	2.02846	9.94703e-98
FCGR3A	microglia-like mac	0.639229	0.199663	0.55493	0.212509	ifn-induced mac	0.99002	1.54877	9.74914e-108
IGF1	microglia-like mac	0.502627	0.139189	0.304199	0.149811	tissue-repair mac	0.954179	1.89838	1.24207e-87
FCGR1A	microglia-like mac	0.597198	0.196025	0.467606	0.207749	ifn-induced mac	0.938451	1.57142	2.02189e-91
SPP1	microglia-like mac	0.872154	0.325249	0.899696	0.341232	SIGLEC15+ mac	0.937733	1.07519	3.17968e-154
PLXDC2	microglia-like mac	0.690018	0.250066	0.500499	0.262924	cDC2	0.921789	1.33589	4.65203e-101
MMP2	microglia-like mac	0.231173	0.0126008	0.0323015	0.0189886	tissue-repair mac cycling	0.916352	3.96391	6.71639e-106
TMEM119	microglia-like mac	0.250438	0.0194021	0.0790274	0.0261542	SIGLEC15+ mac	0.912532	3.64375	1.01079e-98
ENTPD1	microglia-like mac	0.534151	0.171508	0.443669	0.182107	cDC2	0.909745	1.70316	7.62175e-80
APOC1	microglia-like mac	0.525394	0.169716	0.835866	0.180111	SIGLEC15+ mac	0.900622	1.71418	2.11148e-77
LTC4S	microglia-like mac	0.600701	0.217958	0.668246	0.229143	mast	0.885077	1.47341	1.55083e-80
GPR34	microglia-like mac	0.735552	0.289134	0.532808	0.30218	tissue-repair mac	0.880258	1.19673	5.576e-101
OLR1	microglia-like mac	0.345009	0.0702272	0.314286	0.0782578	neutro	0.878995	2.54775	1.88639e-74
APOC2	microglia-like mac	0.231173	0.0165551	0.146919	0.0228273	mast	0.873789	3.7798	4.60535e-94
LPAR5	microglia-like mac	0.446585	0.135815	0.407295	0.144897	SIGLEC15+ mac	0.862682	1.93173	5.20192e-67
TM6SF1	microglia-like mac	0.371278	0.0925291	0.176471	0.100676	cDC2	0.8524	2.29585	1.00718e-66
SERPINF1	microglia-like mac	0.52014	0.184636	0.930556	0.194442	pDC prec	0.851794	1.63762	4.24702e-67
CAPG	microglia-like mac	0.728546	0.30532	0.835866	0.317689	SIGLEC15+ mac	0.835412	1.14668	6.21635e-90
ADAM28	microglia-like mac	0.425569	0.1336	0.464606	0.142133	cDC2	0.830281	1.95099	2.06797e-60
SYT6	microglia-like mac	0.194396	0.00885749	0.0194226	0.0142799	tissue-repair mac	0.825969	4.2489	1.80175e-94
GNB4	microglia-like mac	0.551664	0.21627	0.395693	0.226072	tissue-repair mac cycling	0.820269	1.4869	6.49451e-63
LILRB4	microglia-like mac	0.423818	0.136184	0.625	0.14459	pDC prec	0.819601	1.93385	2.88152e-58
DOCK4	microglia-like mac	0.399299	0.122265	0.259155	0.130361	ifn-induced mac	0.813551	2.03745	1.69532e-57
SUCNR1	microglia-like mac	0.234676	0.0294195	0.428571	0.0354182	SIGLEC15+ mac	0.783942	3.34053	6.47209e-70
LHFPL2	microglia-like mac	0.294221	0.0669057	0.164134	0.073549	SIGLEC15+ mac	0.767858	2.6098	1.26874e-55
SELPLG	microglia-like mac	0.58669	0.260769	0.6875	0.270294	pDC prec	0.767535	1.30825	9.7339e-56
A2M	microglia-like mac	0.868651	0.403227	0.822178	0.416829	tissue-repair mac	0.760139	0.87508	1.73316e-111
SALL1	microglia-like mac	0.145359	0.00121263	0.0121131	0.00542533	tissue-repair mac cycling	0.758291	5.21668	8.37426e-105
NAA20	microglia-like mac	0.611208	0.282174	0.653285	0.29179	MEMP	0.752837	1.23172	1.82678e-55
SIGLEC10	microglia-like mac	0.30648	0.0791374	0.364929	0.0857816	mast	0.7527	2.45595	4.87388e-51
BIN1	microglia-like mac	0.723292	0.34444	0.672948	0.355512	tissue-repair mac cycling	0.748026	1.0342	8.92756e-71
TCEAL3	microglia-like mac	0.437828	0.175357	0.40646	0.183028	tissue-repair mac cycling	0.743484	1.69812	9.86679e-44
PEA15	microglia-like mac	0.464098	0.194232	0.578265	0.202119	cDC2	0.742046	1.5989	7.21295e-44
ABCG2	microglia-like mac	0.418564	0.166974	0.422611	0.174327	tissue-repair mac cycling	0.731157	1.74682	1.84342e-41
B3GNT5	microglia-like mac	0.483363	0.216429	0.444145	0.22423	tissue-repair mac cycling	0.722668	1.49508	5.35035e-41
P3H2	microglia-like mac	0.287215	0.075605	0.364742	0.0817893	SIGLEC15+ mac	0.719075	2.50361	2.6552e-46
CRYBB1	microglia-like mac	0.325744	0.105077	0.258412	0.111526	tissue-repair mac cycling	0.714519	2.1935	9.6284e-42
C12orf75	microglia-like mac	0.420315	0.176992	0.840278	0.184103	pDC prec	0.711283	1.69226	6.70101e-38
LIMS1	microglia-like mac	0.61296	0.30474	0.857143	0.313748	SIGLEC15+ mac	0.710522	1.15917	8.02849e-48
VSIG4	microglia-like mac	0.521891	0.248431	0.499738	0.256423	tissue-repair mac	0.710255	1.36093	1.463e-40
SYNDIG1	microglia-like mac	0.134851	0.00131808	0.0107672	0.0052206	tissue-repair mac cycling	0.708662	5.25514	9.4262e-95
ETV5	microglia-like mac	0.366025	0.138346	0.313594	0.144999	tissue-repair mac cycling	0.706803	1.93103	4.21214e-38
FABP3	microglia-like mac	0.248687	0.0534613	0.139973	0.0591668	tissue-repair mac cycling	0.703135	2.8274	1.5622e-48
SLC29A1	microglia-like mac	0.388792	0.157379	0.537994	0.164142	SIGLEC15+ mac	0.702556	1.80703	1.03917e-36
NUDT14	microglia-like mac	0.371278	0.144145	0.294833	0.150783	SIGLEC15+ mac	0.702427	1.89191	3.92177e-37
HAVCR2	microglia-like mac	0.521891	0.25286	0.489362	0.260723	SIGLEC15+ mac	0.701578	1.3443	4.78712e-39
MERTK	microglia-like mac	0.353765	0.131966	0.262336	0.138448	tissue-repair mac	0.699486	1.97726	2.76411e-37
PALD1	microglia-like mac	0.250438	0.056361	0.138889	0.062033	pDC prec	0.69624	2.78009	8.95406e-47
BLNK	microglia-like mac	0.425569	0.188116	0.770833	0.195056	pDC prec	0.69558	1.63447	3.38349e-35
FSCN1	microglia-like mac	0.728546	0.37502	0.643045	0.385352	tissue-repair mac	0.694741	0.953599	3.64002e-61
IGSF6	microglia-like mac	0.697023	0.36089	0.72682	0.370713	cDC2	0.691674	0.992326	2.79392e-55
LINC01736	microglia-like mac	0.162872	0.00991195	0.0728863	0.0143822	NMP	0.690865	4.24176	9.27326e-70
GNG7	microglia-like mac	0.437828	0.199873	0.652778	0.206828	pDC prec	0.68996	1.57587	2.49498e-34
PDPN	microglia-like mac	0.14711	0.00537776	0.0140845	0.00951991	ifn-induced mac	0.684706	4.65437	3.67873e-76
DHRS9	microglia-like mac	0.313485	0.107081	0.390511	0.113113	MEMP	0.6832	2.17937	8.81227e-37
C1QB	microglia-like mac	0.914186	0.460379	0.943662	0.473641	ifn-induced mac	0.683176	0.747305	5.13614e-112
FMNL3	microglia-like mac	0.327496	0.118311	0.270517	0.124424	SIGLEC15+ mac	0.68252	2.08406	1.17038e-35
SLC12A5	microglia-like mac	0.406305	0.180577	0.662614	0.187174	SIGLEC15+ mac	0.680852	1.67572	1.02595e-32
HPGDS	microglia-like mac	0.602452	0.314704	0.78673	0.323114	mast	0.68062	1.12975	1.783e-41
BAG3	microglia-like mac	0.488616	0.242948	0.448183	0.250128	tissue-repair mac cycling	0.677116	1.38578	2.07034e-33
CYFIP1	microglia-like mac	0.588441	0.308378	0.635258	0.316563	SIGLEC15+ mac	0.676845	1.15023	1.52945e-39
SMIM29	microglia-like mac	0.394046	0.173037	0.317631	0.179496	tissue-repair mac cycling	0.676813	1.7176	3.65071e-32
PIH1D1	microglia-like mac	0.604203	0.318764	0.689781	0.327106	MEMP	0.675179	1.11747	1.03754e-40
TLR10	microglia-like mac	0.245184	0.0597881	0.24327	0.0652063	cDC2	0.669401	2.7302	4.84362e-42
SPATS2L	microglia-like mac	0.374781	0.16186	0.333782	0.168083	tissue-repair mac cycling	0.668347	1.7833	4.17628e-31
PROCR	microglia-like mac	0.176883	0.0185058	0.133739	0.0231344	SIGLEC15+ mac	0.666217	3.76643	1.05382e-57
RAB32	microglia-like mac	0.639229	0.344757	0.754736	0.353363	cDC2	0.664965	1.04026	1.33173e-42
GPN3	microglia-like mac	0.420315	0.199135	0.467153	0.205599	MEMP	0.664866	1.58183	4.83816e-30
CSF3R	microglia-like mac	0.458844	0.228291	0.734258	0.235029	mono	0.664427	1.44805	1.86507e-30
PTAFR	microglia-like mac	0.56042	0.297991	0.512463	0.305661	cDC2	0.664255	1.18528	3.33868e-35
SLC8A1	microglia-like mac	0.345009	0.140402	0.388732	0.146381	ifn-induced mac	0.662948	1.92154	3.17007e-31
ADAP2	microglia-like mac	0.691769	0.374387	0.673885	0.383663	tissue-repair mac	0.662709	0.957992	4.71579e-49
TMIGD3	microglia-like mac	0.231173	0.0516687	0.115493	0.0569147	ifn-induced mac	0.662589	2.8662	4.60687e-43
S100A13	microglia-like mac	0.299475	0.104128	0.222073	0.109837	tissue-repair mac cycling	0.661466	2.20876	6.25869e-34
SESN3	microglia-like mac	0.38704	0.175621	0.516717	0.1818	SIGLEC15+ mac	0.659846	1.70485	1.88662e-29
SNCA	microglia-like mac	0.362522	0.156219	0.70073	0.162248	MEMP	0.659293	1.81863	6.02041e-30
LY86	microglia-like mac	0.737303	0.400116	0.793619	0.40997	cDC2	0.657431	0.891671	1.43112e-55
PPT1	microglia-like mac	0.661996	0.362472	0.778116	0.371225	SIGLEC15+ mac	0.656003	0.990946	9.25699e-44
C1QC	microglia-like mac	0.957968	0.491591	0.976247	0.505221	tissue-repair mac	0.654063	0.68276	8.49388e-128
GSN	microglia-like mac	0.837128	0.446671	0.987842	0.458082	SIGLEC15+ mac	0.653552	0.780708	7.47802e-78
AC098613.1	microglia-like mac	0.339755	0.140296	0.400798	0.146125	cDC2	0.653447	1.92329	7.17342e-30
LINC01094	microglia-like mac	0.201401	0.03427	0.167173	0.0391545	SIGLEC15+ mac	0.652588	3.24024	2.69036e-47
CSF2RA	microglia-like mac	0.527145	0.283545	0.58325	0.290664	cDC2	0.651333	1.23559	5.39313e-31
MKNK1	microglia-like mac	0.513135	0.274424	0.484522	0.2814	tissue-repair mac cycling	0.650643	1.26798	3.57771e-30
C1QA	microglia-like mac	0.915937	0.479412	0.966273	0.492169	tissue-repair mac	0.649338	0.708933	4.86117e-105
MGAT4A	microglia-like mac	0.402802	0.193389	0.277778	0.199509	pDC prec	0.649276	1.6119	1.44314e-27
ANPEP	SIGLEC15+ mac	0.969605	0.0217086	0.123629	0.0376702	cDC2	3.17922	3.27889	0
CTSK	SIGLEC15+ mac	0.796353	0.00817325	0.0175131	0.0214454	microglia-like mac	3.05978	3.84225	0
SIGLEC15	SIGLEC15+ mac	0.68997	0.00249883	0.0058309	0.0140751	NMP	2.94158	4.26335	0
ATP6V0D2	SIGLEC15+ mac	0.659574	0.0038003	0.00853018	0.0148429	tissue-repair mac	2.77696	4.21024	0
COL6A1	SIGLEC15+ mac	0.793313	0.0219689	0.0398804	0.0349575	cDC2	2.66047	3.35362	0
PARM1	SIGLEC15+ mac	0.659574	0.00728825	0.0757727	0.0182721	cDC2	2.63987	4.00238	0
COL6A2	SIGLEC15+ mac	0.81155	0.0285283	0.0736196	0.0417136	HSC/MPP	2.57824	3.17693	9.05104e-319
RUFY4	SIGLEC15+ mac	0.574468	0.00432089	0.0140845	0.0139216	ifn-induced mac	2.45546	4.27431	7.97599e-291
CAVIN3	SIGLEC15+ mac	0.49848	0.00327971	0.0176991	0.0116184	mega	2.22081	4.45517	1.0226e-252
ACP5	SIGLEC15+ mac	0.951368	0.0907908	0.20339	0.105282	cDC2	2.14164	2.25111	7.05543e-287
COL27A1	SIGLEC15+ mac	0.483283	0.00390442	0.014218	0.0119767	mast	2.13843	4.4248	4.81949e-237
HTRA3	SIGLEC15+ mac	0.525836	0.00895414	0.0758017	0.0176579	NMP	2.12257	4.03657	1.96494e-226
PLEKHF1	SIGLEC15+ mac	0.544073	0.0148889	0.10498	0.0237998	NK	2.03379	3.73808	6.84442e-209
COL1A2	SIGLEC15+ mac	0.62614	0.0311312	0.0929204	0.0411506	mega	1.99771	3.19052	1.1605e-203
HSD3B7	SIGLEC15+ mac	0.513678	0.0127544	0.0473934	0.0211895	mast	1.97984	3.85425	6.70346e-201
EHD2	SIGLEC15+ mac	0.43465	0.00338383	0.080292	0.0106459	MEMP	1.97443	4.54258	3.24923e-212
HSPB7	SIGLEC15+ mac	0.389058	0.000520589	0.0028169	0.00706316	ifn-induced mac	1.92695	4.95286	4.06047e-222
S100A3	SIGLEC15+ mac	0.392097	0.00130147	0.0486111	0.00788208	pDC prec	1.89899	4.84316	2.43366e-210
LXN	SIGLEC15+ mac	0.683891	0.0534645	0.576642	0.0640803	MEMP	1.87907	2.74762	1.5468e-189
MMP9	SIGLEC15+ mac	0.978723	0.139882	0.428571	0.154008	neutro	1.83095	1.87075	4.47315e-252
CD109	SIGLEC15+ mac	0.553191	0.0278515	0.142336	0.0366977	MEMP	1.82832	3.30504	1.85144e-174
CKB	SIGLEC15+ mac	0.705167	0.0665313	0.620438	0.0772853	MEMP	1.80541	2.56025	9.47597e-181
LMNA	SIGLEC15+ mac	0.914894	0.125774	0.438053	0.139062	mega	1.80493	1.97283	6.04266e-223
SLC16A7	SIGLEC15+ mac	0.604863	0.0432089	0.112565	0.0526666	early T	1.78058	2.94377	1.36142e-168
PDE4DIP	SIGLEC15+ mac	0.902736	0.127596	0.182021	0.140649	tissue-repair mac	1.7707	1.96149	3.82991e-214
NFATC1	SIGLEC15+ mac	0.768997	0.0887605	0.142336	0.100215	MEMP	1.76903	2.30044	3.06212e-184
PPIC	SIGLEC15+ mac	0.386018	0.00447707	0.0442478	0.0109018	mega	1.74435	4.51882	2.47123e-174
RFTN2	SIGLEC15+ mac	0.349544	0.00098912	0.00947867	0.00685843	mast	1.74153	4.98228	1.01765e-188
SPARC	SIGLEC15+ mac	0.674772	0.0656463	0.646018	0.0759034	mega	1.73976	2.57829	1.0164e-167
SLC9B2	SIGLEC15+ mac	0.510638	0.0250403	0.248175	0.0332173	MEMP	1.73856	3.40468	2.44871e-160
CLEC4A	SIGLEC15+ mac	0.933131	0.158624	0.516451	0.171665	cDC2	1.64437	1.76221	2.22444e-205
SELENOM	SIGLEC15+ mac	0.449848	0.0196783	0.046466	0.0269219	early T	1.62612	3.61482	1.50033e-144
SLC37A2	SIGLEC15+ mac	0.805471	0.129887	0.228871	0.141263	tissue-repair mac	1.57641	1.95713	1.22392e-162
CALHM2	SIGLEC15+ mac	0.696049	0.0938102	0.302094	0.103951	cDC2	1.57574	2.26383	4.7099e-146
CA2	SIGLEC15+ mac	0.601824	0.0647093	0.530973	0.0737537	mega	1.56897	2.60702	6.28557e-137
CLDN7	SIGLEC15+ mac	0.379939	0.0106721	0.0289133	0.0168902	cDC2	1.55054	4.08102	1.61822e-138
TXLNB	SIGLEC15+ mac	0.410334	0.0162944	0.0422535	0.0229297	ifn-induced mac	1.54914	3.77532	6.54611e-135
NRIP3	SIGLEC15+ mac	0.398176	0.0144203	0.0900474	0.0208824	mast	1.54048	3.86885	1.20231e-134
RAB13	SIGLEC15+ mac	0.960486	0.189963	0.591241	0.202938	MEMP	1.53184	1.59486	2.34572e-199
SPINT1	SIGLEC15+ mac	0.49848	0.0393566	0.184447	0.0470877	cDC2	1.52323	3.05574	2.79033e-127
FILIP1L	SIGLEC15+ mac	0.647416	0.0869905	0.21336	0.0964275	cDC2	1.51428	2.33896	2.07019e-132
EXT1	SIGLEC15+ mac	0.410334	0.018533	0.113744	0.0251305	mast	1.51154	3.68367	7.79172e-129
SLC4A2	SIGLEC15+ mac	0.607903	0.076006	0.164199	0.0849626	tissue-repair mac cycling	1.49881	2.46554	3.01744e-127
LGALS3	SIGLEC15+ mac	0.860182	0.164194	0.485382	0.175914	mono	1.49479	1.73776	1.25971e-162
ARHGAP10	SIGLEC15+ mac	0.534954	0.0535686	0.106339	0.0616747	HSC/MPP	1.49032	2.78588	8.21596e-123
PTPRN	SIGLEC15+ mac	0.291793	0.00140559	0.0663717	0.00629542	mega	1.47879	5.06793	8.11458e-148
LAT	SIGLEC15+ mac	0.556231	0.0619501	0.650442	0.0702733	mega	1.477	2.65536	1.61569e-121
SYCE1L	SIGLEC15+ mac	0.468085	0.0367536	0.127737	0.0440168	MEMP	1.46192	3.12318	1.71737e-118
SCD5	SIGLEC15+ mac	0.319149	0.00557031	0.0216749	0.0108507	pro-B	1.44368	4.52353	3.07363e-130
GPNMB	SIGLEC15+ mac	0.617021	0.0881878	0.208451	0.0970928	ifn-induced mac	1.43895	2.33209	2.21143e-119
REPIN1	SIGLEC15+ mac	0.735562	0.132386	0.277168	0.142543	cDC2	1.43296	1.94811	7.05437e-131
APOC1	SIGLEC15+ mac	0.835866	0.168879	0.525394	0.180111	microglia-like mac	1.43283	1.71418	2.99717e-148
SUCNR1	SIGLEC15+ mac	0.428571	0.0286845	0.234676	0.0354182	microglia-like mac	1.43166	3.34053	2.8868e-115
EOGT	SIGLEC15+ mac	0.458967	0.0372742	0.120438	0.0443751	MEMP	1.42972	3.11508	6.21839e-114
FXYD6	SIGLEC15+ mac	0.483283	0.0448227	0.0982009	0.052206	mono	1.42692	2.95256	3.5385e-113
CD9	SIGLEC15+ mac	0.723404	0.129679	0.637765	0.139677	pre-B	1.42397	1.96843	5.36069e-128
IGFBP6	SIGLEC15+ mac	0.340426	0.00978708	0.208589	0.0153547	HSC/MPP	1.42173	4.17633	4.32986e-122
JDP2	SIGLEC15+ mac	0.598784	0.0844916	0.170929	0.0931518	tissue-repair mac cycling	1.42123	2.37352	1.09446e-115
OXR1	SIGLEC15+ mac	0.838906	0.174762	0.306569	0.185945	MEMP	1.41129	1.6823	6.97745e-146
TNNT1	SIGLEC15+ mac	0.425532	0.0296215	0.154423	0.0362883	mono	1.41117	3.31626	2.41862e-112
PDLIM4	SIGLEC15+ mac	0.316109	0.00645531	0.0197044	0.0116696	pro-B	1.40693	4.45077	5.12771e-124
DNM1	SIGLEC15+ mac	0.389058	0.0207195	0.0620438	0.0269219	MEMP	1.40637	3.61482	6.28984e-114
PNMA1	SIGLEC15+ mac	0.462006	0.040658	0.19469	0.0477531	mega	1.40529	3.04171	2.71391e-110
THOP1	SIGLEC15+ mac	0.571429	0.0808996	0.328467	0.0891596	MEMP	1.38133	2.41733	1.18249e-108
APOE	SIGLEC15+ mac	0.857143	0.188818	0.651489	0.200072	microglia-like mac	1.37921	1.60908	1.93644e-145
ITGAV	SIGLEC15+ mac	0.601824	0.0929773	0.206655	0.101546	microglia-like mac	1.37652	2.28725	1.11345e-109
RIOX2	SIGLEC15+ mac	0.50152	0.0570566	0.226277	0.0645409	MEMP	1.37439	2.74046	1.14192e-105
TNFRSF11A	SIGLEC15+ mac	0.568389	0.0812119	0.189771	0.0894155	tissue-repair mac cycling	1.37235	2.41446	2.91823e-107
RAB34	SIGLEC15+ mac	0.680851	0.126243	0.40146	0.135582	MEMP	1.36046	1.99818	3.70375e-114
VASH1	SIGLEC15+ mac	0.483283	0.0533083	0.197898	0.0605487	microglia-like mac	1.35527	2.80431	6.89942e-103
IQSEC2	SIGLEC15+ mac	0.431611	0.0366495	0.0805604	0.0433002	microglia-like mac	1.35508	3.1396	8.88388e-104
SPR	SIGLEC15+ mac	0.367781	0.019418	0.0620438	0.0252841	MEMP	1.35255	3.67758	2.02839e-107
ATP6V1H	SIGLEC15+ mac	0.796353	0.1732	0.405109	0.183693	MEMP	1.34941	1.69449	7.34118e-129
CDC42EP1	SIGLEC15+ mac	0.31003	0.00796502	0.0438684	0.0130515	cDC2	1.34518	4.33885	3.92257e-114
MVP	SIGLEC15+ mac	0.68997	0.133167	0.307042	0.142543	ifn-induced mac	1.34414	1.94811	6.35989e-113
RALA	SIGLEC15+ mac	0.899696	0.213494	0.660584	0.225049	MEMP	1.34184	1.49144	5.2232e-151
SLC39A1	SIGLEC15+ mac	0.796353	0.177209	0.459854	0.187634	MEMP	1.33251	1.67326	1.56862e-126
CD84	SIGLEC15+ mac	0.841945	0.194596	0.485401	0.205497	MEMP	1.33223	1.58232	2.04408e-135
MATK	SIGLEC15+ mac	0.87234	0.206205	0.706595	0.217422	NK	1.33112	1.52591	2.67897e-142
NRP2	SIGLEC15+ mac	0.820669	0.187881	0.43662	0.198536	ifn-induced mac	1.32684	1.61678	2.7838e-130
CADM1	SIGLEC15+ mac	0.349544	0.0168671	0.0647986	0.022469	microglia-like mac	1.32674	3.79562	2.98823e-105
COQ8A	SIGLEC15+ mac	0.528875	0.0740278	0.364964	0.081687	MEMP	1.32476	2.50486	3.33855e-99
CRABP2	SIGLEC15+ mac	0.288754	0.00546619	0.0189573	0.0102365	mast	1.32301	4.5818	8.38437e-115
PSTPIP1	SIGLEC15+ mac	0.711246	0.146702	0.431487	0.156208	NMP	1.32047	1.85656	3.54763e-112
ST18	SIGLEC15+ mac	0.31307	0.00973502	0.0695297	0.0148429	HSC/MPP	1.3181	4.21024	6.5041e-109
CD151	SIGLEC15+ mac	0.629179	0.116872	0.530973	0.125499	mega	1.30583	2.07546	5.94859e-102
PRCP	SIGLEC15+ mac	0.887538	0.223645	0.569292	0.234824	cDC2	1.28597	1.44892	8.42051e-140
ABCC3	SIGLEC15+ mac	0.328267	0.0147327	0.261062	0.0200123	mega	1.28399	3.91141	4.8657e-101
STAP2	SIGLEC15+ mac	0.300912	0.00911031	0.026178	0.014024	early T	1.28399	4.26699	2.89555e-105
F2R	SIGLEC15+ mac	0.404255	0.0361289	0.411504	0.0423278	mega	1.27838	3.16231	9.61386e-94
SUPT3H	SIGLEC15+ mac	0.556231	0.0931334	0.320681	0.100932	early T	1.27561	2.29331	2.08267e-93
TNNI2	SIGLEC15+ mac	0.653495	0.133791	0.6875	0.142543	pDC prec	1.27308	1.94811	1.40218e-99
CDK5	SIGLEC15+ mac	0.610942	0.117601	0.357664	0.125908	MEMP	1.26599	2.0722	3.46907e-95
SDC1	SIGLEC15+ mac	0.237082	0.000832943	0.008867	0.00481114	pro-B	1.26526	5.33682	4.19341e-123
SERPINF1	SIGLEC15+ mac	0.768997	0.184601	0.930556	0.194442	pDC prec	1.25933	1.63762	6.61467e-112
ADK	SIGLEC15+ mac	0.644377	0.133115	0.49635	0.141724	MEMP	1.25903	1.95388	7.12225e-97
RAI14	SIGLEC15+ mac	0.267477	0.00499766	0.0236967	0.00941755	mast	1.24783	4.66518	2.94732e-106
IGSF21	SIGLEC15+ mac	0.392097	0.0355562	0.0985915	0.04156	ifn-induced mac	1.24711	3.18062	7.55559e-90
MAGEF1	SIGLEC15+ mac	0.62614	0.128846	0.345962	0.13722	cDC2	1.24362	1.98617	2.60149e-93
KIFC3	SIGLEC15+ mac	0.31003	0.013223	0.230088	0.0182209	mega	1.24173	4.00519	8.69304e-97

## Sheet: 2_SVM_predictions_fetalLiver
	prob_B cell	prob_DC1	prob_DC2	prob_Early lymphoid/T lymphocyte	prob_Erythroblastic Island Macrophage	prob_HSC/MPP	prob_ILC precursor	prob_Kupffer Cell	prob_MEMP	prob_Mast cell	prob_Megakaryocyte	prob_Mono-Mac	prob_Mono-NK	prob_Monocyte	prob_Monocyte-DC precursor	prob_NK	prob_Neutrophil-myeloid progenitor	prob_VCAM1+ Erythroblastic Island Macrophage	prob_pDC precursor	prob_pre B cell	prob_pre pro B cell	prob_pro B cell
FCA_GND8047884_CCCATACAGAGATGAG	0.00585694	0.00368936	0.00518392	0.108718	0.0281399	0.0755418	0.00593822	0.18802	0.258621	0.00490375	0.195764	0.0225012	0.0101422	0.013379	0.00636929	0.00922781	0.0151978	0.0166467	0.00361448	0.0125356	0.0047308	0.00527834
FCA_GND8047884_CTTAGGATCAGTGCAT	0.00234245	0.00234476	0.0327388	0.0767862	0.00668608	0.0501614	0.0103642	0.389034	0.0704544	0.00137109	0.00143312	0.234116	0.00629432	0.0265965	0.0131889	0.027181	0.00349983	0.0265143	0.00181242	0.00908695	0.00354966	0.00444285
FCA_GND8047884_TGGCCAGCAGAAGCAC	0.00052562	0.000664112	0.00150198	0.0812282	0.00160854	0.0508576	0.00350727	0.0112408	0.328915	0.000504945	0.000291475	0.00124283	0.00168536	0.000832486	0.128143	0.00895011	0.000668594	0.000860015	0.000631571	0.320343	0.000727247	0.0550704
FCA_GND8047884_TTCGAAGCATGTCTCC	0.006549	0.0128476	0.0995675	0.1878	0.00707859	0.127964	0.0186387	0.00501768	0.118224	0.00300076	0.00244169	0.0747635	0.0169876	0.00879698	0.276635	0.00512599	0.00312287	0.00460881	0.00279622	0.00954864	0.0041947	0.00429088
FCA_GND8125922_AAACCTGAGTGGGCTA	0.00507371	0.00198711	0.0111341	0.11872	0.00482449	0.0647463	0.00607596	0.291251	0.256592	0.000829864	0.0011315	0.107678	0.00704903	0.014124	0.0230067	0.00683408	0.00270553	0.00711312	0.000925435	0.0435448	0.00874878	0.0159033
FCA_GND8125922_AAACCTGCATTGGGCC	5.30772e-05	8.48293e-05	0.00011826	0.000265556	8.25926e-05	0.00193806	0.000228412	0.000137528	0.00485015	0.000125699	0.000159206	0.00113368	0.000146254	0.00263167	0.982728	9.03611e-05	0.00349076	0.000454166	4.90751e-05	0.000396132	0.000712077	0.000124042
FCA_GND8125922_AAACGGGCAGCGATCC	0.000853649	0.000905927	0.0820892	0.00925901	0.000758324	0.019103	0.000576694	0.00091783	0.00564218	0.000171053	0.000223616	0.0478267	0.0055908	0.00148175	0.818802	0.00141108	0.000288383	0.000581421	0.000256751	0.00202178	0.000545976	0.000693118
FCA_GND8125922_AACACGTGTGTAAGTA	0.00072403	0.00081524	0.00225968	0.0380048	0.00210581	0.0714608	0.00200233	0.0305282	0.717771	0.000617343	0.000607683	0.00953498	0.00414949	0.00183692	0.0230999	0.00482883	0.00114705	0.00197903	0.0010016	0.0609175	0.00141214	0.0231954
FCA_GND8125922_AACCATGGTTGAGTTC	0.00198454	0.00134539	0.0046941	0.0439042	0.00630108	0.0284049	0.0133112	0.524945	0.159622	0.000516347	0.000285876	0.127349	0.0098903	0.00738142	0.00803992	0.00952399	0.00091858	0.0184441	0.00039387	0.0269187	0.00228481	0.00354018
FCA_GND8125922_AACGTTGCAGGAATGC	0.0144252	0.00398496	0.00852374	0.0440037	0.00818023	0.0903361	0.00364243	0.0193093	0.320219	0.00248031	0.00190775	0.253479	0.0127222	0.010554	0.0170823	0.00950449	0.00241292	0.0045687	0.00171465	0.0587765	0.0289332	0.083239
FCA_GND8125922_AACGTTGGTGCAGGTA	0.00211024	0.000686656	0.671177	0.00248048	0.000470226	0.00570944	0.000314897	0.00298545	0.00492309	0.000248259	0.000144189	0.212255	0.0100689	0.00869465	0.0683603	0.000635123	0.00024026	0.0014937	0.000171539	0.00443701	0.00131138	0.00108236
FCA_GND8125922_AACTCCCAGTATGACA	0.00636201	0.00512525	0.00858477	0.0391467	0.0633626	0.111415	0.0175424	0.16873	0.269395	0.00414738	0.00378855	0.0433145	0.0107508	0.0509856	0.07467	0.0132681	0.00730193	0.0352475	0.00425507	0.0281918	0.0119389	0.0224768
FCA_GND8125922_AACTCCCCACACCGCA	0.00024892	0.000252055	0.000301581	0.0210603	0.000356123	0.62609	0.000625619	0.000497497	0.277998	0.0508262	0.00212258	0.00180599	0.000807858	0.000491675	0.00208573	0.00286094	0.00604612	0.000401069	0.000266593	0.00213394	0.0013451	0.00137644
FCA_GND8125922_AACTCCCGTGAGGCTA	5.25455e-05	5.85957e-05	0.000167334	0.00240315	0.000418951	0.00306954	0.00059256	0.00280484	0.00891581	0.000284437	2.60062e-05	0.00671314	0.000928962	0.963798	0.00561918	0.000231658	3.77388e-05	0.00105613	2.31087e-05	0.00270252	5.99819e-05	3.54512e-05
FCA_GND8125922_AACTGGTAGAACTCGG	0.00144236	0.00153238	0.00224557	0.0880978	0.00260258	0.160239	0.00163796	0.00712536	0.64416	0.000825096	0.000545777	0.0256188	0.0108954	0.0021343	0.0144828	0.00628931	0.000667753	0.00091098	0.000315629	0.0261684	0.000712199	0.00135028
FCA_GND8125922_AACTGGTGTCCAGTTA	0.00166565	0.000273146	0.00025444	0.0064675	0.000231745	0.930134	0.000179831	0.000203108	0.00860063	0.0007668	0.000366077	0.000292705	0.000326982	0.000203373	0.000230706	0.000268351	0.00105173	0.000154853	0.013879	0.00182006	0.0311843	0.00144483
FCA_GND8125922_AACTTTCAGTGTACTC	0.00280183	0.00509735	0.0189541	0.00710602	0.00195887	0.0178694	0.00234238	0.358616	0.0825568	0.000716036	0.000683214	0.307756	0.0332551	0.0290541	0.0226605	0.0069037	0.000915882	0.0184527	0.000935735	0.0746896	0.00204813	0.00462641
FCA_GND8125922_AACTTTCTCTGATACG	0.0137087	0.00222716	0.0452542	0.0358489	0.00605713	0.0249761	0.00441761	0.0218391	0.175465	0.00108102	0.00105097	0.427786	0.0282277	0.0182836	0.122782	0.00542715	0.00151627	0.00809463	0.00126555	0.0434583	0.0065488	0.00468448
FCA_GND8125922_AAGGAGCCATGCCTAA	0.000261617	0.000106291	0.00080755	0.00358652	0.000379552	0.00270702	0.00386437	0.00122438	0.0023266	0.000106015	8.76824e-05	0.00327108	0.00290496	0.902778	0.0700653	0.000882627	0.000174522	0.000514355	4.1276e-05	0.00361696	0.000182245	0.00011107
FCA_GND8125922_AAGGAGCTCAAGGTAA	0.00415208	0.00173708	0.00433053	0.0523496	0.00740629	0.077992	0.00258623	0.0292336	0.56741	0.00163855	0.00264532	0.133385	0.0171568	0.00804726	0.0127107	0.00505593	0.00203841	0.00805239	0.00143702	0.0534371	0.00258367	0.00461422
FCA_GND8125922_AAGGTTCCATAGGATA	0.00188131	0.00181259	0.00548172	0.019116	0.00422962	0.0831642	0.00365977	0.354471	0.386892	0.00170614	0.00191319	0.0301667	0.0456165	0.0159479	0.00684065	0.00432214	0.00155718	0.0110608	0.00224085	0.0120362	0.00277671	0.00310688
FCA_GND8125922_AAGGTTCTCTGGCGAC	0.000447674	0.00019657	0.000526783	0.0606434	0.00121928	0.0537727	0.000687484	0.0153116	0.766574	0.000101245	9.13913e-05	0.001292	0.001655	0.000287617	0.0334016	0.00246846	0.0002855	0.000424296	0.000126948	0.0563453	0.000180326	0.00396054
FCA_GND8125922_AAGTCTGAGAGCCTAG	0.000618374	0.00162995	0.00212636	0.00538553	0.00293085	0.00905386	0.00149923	0.00453783	0.0195699	0.00047822	0.000438411	0.00176222	0.00408518	0.00146748	0.867877	0.00159031	0.000560076	0.00155544	0.000521097	0.0692642	0.000666769	0.00238153
FCA_GND8125922_AAGTCTGTCCCTGACT	0.0035321	0.00565569	0.00767894	0.010545	0.00436115	0.186046	0.00359397	0.357199	0.214007	0.00160022	0.00168007	0.090594	0.0248682	0.0116983	0.0141256	0.0153771	0.0023324	0.00900336	0.0017081	0.0224795	0.00284801	0.00906738
FCA_GND8125922_AATCGGTGTGTGACGA	0.00282843	0.00264655	0.00502239	0.0275157	0.00576965	0.0814185	0.00412413	0.0124306	0.380697	0.00199027	0.00173527	0.00508929	0.00668971	0.00464039	0.245168	0.015592	0.00220625	0.00440206	0.00232613	0.160005	0.00294884	0.0247541
FCA_GND8125922_ACACCCTAGCTAAGAT	0.00200468	0.000945779	0.0206337	0.0960631	0.00290419	0.153988	0.00237542	0.0087621	0.481772	0.000738998	0.00083168	0.163217	0.00466792	0.00328769	0.02031	0.00701726	0.00105123	0.00323538	0.000692507	0.0218209	0.00204632	0.00163478
FCA_GND8125922_ACATACGCATTCTCAT	0.00254739	0.000632301	0.00167742	0.0136863	0.00136741	0.0284315	0.00366277	0.0104327	0.0638778	0.000455408	0.000329777	0.00375847	0.00747586	0.0332423	0.789186	0.00737219	0.00141013	0.00221371	0.000563495	0.0207823	0.00194618	0.00494848
FCA_GND8125922_ACATCAGCATCCCATC	0.0017009	0.000947978	0.0015775	0.0205794	0.00461573	0.0169013	0.000824071	0.69884	0.187129	0.0006232	0.000770085	0.0165091	0.0201776	0.00214329	0.00080591	0.00472912	0.00064845	0.00230316	0.000501565	0.0162491	0.000696897	0.000726635
FCA_GND8125922_ACATGGTCACTCAGGC	0.0155264	0.00418702	0.0243954	0.0189374	0.00456664	0.0374654	0.00389304	0.512732	0.0896542	0.000988725	0.000797066	0.102529	0.00841877	0.0212915	0.0384808	0.00532562	0.00156424	0.0150773	0.00111618	0.0579169	0.00842306	0.0267131
FCA_GND8125922_ACCAGTACAGGGTTAG	0.00251692	0.0019761	0.00240802	0.0160358	0.00188545	0.0179269	0.00122881	0.0470964	0.819494	0.00052049	0.000742232	0.0127263	0.0387105	0.00223718	0.011009	0.00323592	0.000644525	0.00429607	0.00404165	0.00740788	0.00191005	0.00195014
FCA_GND8125922_ACCAGTATCATGGTCA	0.00841987	0.00558059	0.0111841	0.0392666	0.00929716	0.230496	0.00961302	0.0441559	0.191352	0.00458109	0.00379881	0.0343872	0.0354912	0.185124	0.0699822	0.020289	0.00678686	0.0118598	0.0040818	0.0530189	0.012072	0.00916208
FCA_GND8125922_ACCCACTAGGGAACGG	0.00496972	0.00304773	0.0110462	0.118264	0.0100372	0.0496555	0.00830024	0.0606596	0.375836	0.00166662	0.00185555	0.0293694	0.0284072	0.0118895	0.0867608	0.0242863	0.0023158	0.0132748	0.00422795	0.115638	0.0114557	0.0270359
FCA_GND8125922_ACCGTAAGTTGTGGCC	0.00262444	0.00166555	0.00962999	0.0820135	0.00605522	0.0524887	0.00186556	0.410352	0.27851	0.000926479	0.000906592	0.0344459	0.0227485	0.00970187	0.0279932	0.0135766	0.00145507	0.0107449	0.00106323	0.0148063	0.0028874	0.013539
FCA_GND8125922_ACCGTAATCTTAGCCC	0.00104652	0.00190074	0.00594813	0.015223	0.00221142	0.0463042	0.000821541	0.319972	0.267414	0.000408569	0.000725961	0.294741	0.0080907	0.0151458	0.00458524	0.00415892	0.000543409	0.00173284	0.000217794	0.00588319	0.000695172	0.00222967
FCA_GND8125922_ACCTTTAAGTATCTCG	0.0105678	0.00315017	0.043564	0.04726	0.0103919	0.072653	0.00714481	0.112705	0.24336	0.00197396	0.00167375	0.21568	0.014745	0.0214678	0.036312	0.00829441	0.00238769	0.0104955	0.00224018	0.0968644	0.00803279	0.0290347
FCA_GND8125922_ACGAGGAGTGTTTGGT	0.00237888	0.00535602	0.0922906	0.0581198	0.00496429	0.0812824	0.00588564	0.158613	0.112353	0.00102708	0.000882353	0.194596	0.00989545	0.0183759	0.201774	0.00584952	0.0017402	0.00981907	0.00146305	0.0183129	0.0051294	0.00989106
FCA_GND8125922_ACGATACAGAGACGAA	0.000647251	0.000634485	0.00123323	0.0036135	0.000723338	0.120195	0.00227447	0.00127832	0.0885258	0.000508155	0.000292508	0.00824609	0.00116417	0.026035	0.718349	0.00213375	0.00555126	0.00246003	0.000331221	0.00406571	0.00873558	0.00300206
FCA_GND8125922_ACGCAGCAGCTCAACT	0.0048721	0.000937426	0.00999441	0.0279984	0.00341739	0.11217	0.00116949	0.043254	0.573949	0.000553549	0.000522466	0.0592638	0.00788901	0.00546547	0.0665047	0.00500784	0.00118159	0.00611926	0.000645114	0.0420884	0.00289827	0.0240985
FCA_GND8125922_ACGCCGAGTCCGACGT	0.000126754	0.000131831	0.000254244	0.000225534	9.20289e-05	0.00355584	8.76243e-05	0.000470137	0.000616452	0.000330568	6.61412e-05	0.00155682	0.00213929	0.695306	0.292342	0.00031866	0.000121789	0.000279094	2.75414e-05	0.00183985	7.212e-05	3.96541e-05
FCA_GND8125922_ACGGGCTAGGTAGCCA	0.00837042	0.00489972	0.113847	0.0248076	0.00358114	0.0492328	0.00517263	0.00950226	0.12083	0.00207759	0.00189896	0.0634525	0.0232015	0.00968916	0.383136	0.00503355	0.00294677	0.00567739	0.00304686	0.14792	0.00430732	0.00736892
FCA_GND8125922_ACGGGCTGTCTAAAGA	0.000392369	0.000340847	0.00131098	0.00270302	0.000401132	0.00439554	0.000676833	0.00843054	0.00741859	0.000203732	0.000199694	0.00447103	0.00482456	0.0806306	0.868863	0.000740288	0.000289244	0.00640268	0.000189961	0.00558199	0.000943948	0.000588947
FCA_GND8125922_ACGTCAAAGTACGTTC	0.0036011	0.00334031	0.0112985	0.0663015	0.00486644	0.0563752	0.00896946	0.0504738	0.280987	0.00134953	0.0015672	0.275675	0.0230058	0.0187943	0.0923192	0.0174753	0.00323967	0.0140278	0.0016633	0.0430236	0.00613529	0.015511
FCA_GND8125922_ACGTCAAGTACCGGCT	7.74548e-05	1.01213e-05	6.32986e-06	0.000491485	6.92619e-05	0.000153473	6.80815e-06	0.000340562	0.00278027	1.3861e-05	0.995621	1.27211e-05	4.61042e-05	1.09475e-05	7.24943e-06	1.09072e-05	0.000168825	4.62925e-05	3.03279e-05	4.6147e-05	2.78155e-05	2.19679e-05
FCA_GND8125922_ACTATCTCACATTTCT	0.00164911	0.00101613	0.00420382	0.0521216	0.00616126	0.0204641	0.00261748	0.496178	0.305043	0.000528875	0.000779204	0.0169246	0.0277386	0.00441354	0.0104863	0.023526	0.00093184	0.00678772	0.000622306	0.0130156	0.00127227	0.00351853
FCA_GND8125922_ACTATCTCACGAAGCA	0.0147352	0.00352819	0.017403	0.0483649	0.00782385	0.151957	0.00412232	0.117978	0.370558	0.00302806	0.0023764	0.0482425	0.0813362	0.0125393	0.0245679	0.00643776	0.00463155	0.0110248	0.00262203	0.0503551	0.00450878	0.0118594
FCA_GND8125922_ACTATCTCAGCTGCTG	0.00595707	0.00333174	0.013276	0.0230193	0.0132588	0.0986005	0.00495303	0.114933	0.297483	0.00148096	0.00123877	0.303653	0.0268961	0.0130053	0.0172564	0.0111849	0.00287086	0.0208263	0.00160155	0.0186926	0.00359708	0.00288428
FCA_GND8125922_ACTGAACTCTATCCCG	9.97391e-05	4.05391e-05	1.32386e-05	4.18677e-05	2.70525e-05	9.46335e-05	5.72216e-05	6.05174e-05	0.000935679	0.997618	0.000276525	7.54239e-05	5.96098e-05	8.02206e-05	3.00568e-05	4.42886e-05	4.92097e-05	1.99162e-05	4.47936e-05	0.000171445	4.19095e-05	0.000118055
FCA_GND8125922_ACTGAGTAGAAGGTGA	0.0301347	0.000142303	0.00125531	2.99427e-05	3.46119e-05	8.10558e-05	4.26923e-05	5.73809e-05	3.87449e-05	0.000404017	0.00041993	4.89644e-05	8.22972e-05	6.70557e-05	7.32845e-05	5.02347e-05	0.000118288	4.00418e-05	0.966135	0.000499781	0.00016564	7.89189e-05
FCA_GND8125922_ACTGAGTAGTTAAGTG	0.007814	0.00142079	0.0338024	0.0414218	0.00479084	0.0384726	0.00378687	0.0749599	0.393781	0.000778696	0.00099988	0.307822	0.0154084	0.0220237	0.0145961	0.00430074	0.000879898	0.00538719	0.000711862	0.0200445	0.00361421	0.00318281
FCA_GND8125922_ACTGATGTCCTAGAAC	0.00269997	0.00160587	0.00832121	0.0260378	0.0100477	0.0581092	0.00324308	0.168619	0.208755	0.00134806	0.0014944	0.41693	0.00536888	0.0146712	0.006886	0.00505525	0.00156295	0.016825	0.000813404	0.0273546	0.00375144	0.0105
FCA_GND8125922_ACTGCTCAGGAGTAGA	0.0010524	0.00209673	0.0900008	0.0655964	0.00143405	0.0414372	0.00130087	0.00578956	0.0658744	0.000432824	0.000481417	0.0677177	0.00849709	0.00883996	0.621553	0.00423294	0.000732256	0.00147549	0.000561806	0.00794338	0.000779268	0.00217073
FCA_GND8125922_ACTTACTTCCCTGACT	0.00333228	0.00361495	0.0039358	0.00969954	0.00281003	0.0506908	0.00434689	0.00717376	0.156995	0.00415994	0.00186634	0.00747796	0.00479735	0.00993879	0.595302	0.00452562	0.0971962	0.00736315	0.00203026	0.00638351	0.0109201	0.00543974
FCA_GND8125922_AGACGTTCAGTTTACG	0.00174939	0.000385614	0.00453945	0.0244749	0.00205403	0.166567	0.000557588	0.00813746	0.439193	0.000323508	0.000373953	0.294354	0.0123222	0.00211906	0.0145216	0.000707729	0.000623961	0.00199362	0.000309821	0.0224584	0.000724497	0.00150819
FCA_GND8125922_AGAGCTTAGGTTACCT	0.00261201	0.00153728	0.0252853	0.0317278	0.00301652	0.0398395	0.00269994	0.230388	0.129512	0.000780034	0.000607519	0.162115	0.0115383	0.15817	0.109141	0.00499116	0.00116973	0.023202	0.000768884	0.0536976	0.00234267	0.00485819
FCA_GND8125922_AGAGCTTCAGACTCGC	0.0014776	0.00154673	0.00236818	0.0389735	0.00251784	0.0357946	0.0055752	0.00724715	0.138575	0.00079187	0.0005316	0.00308561	0.0116303	0.020938	0.558781	0.0105393	0.00089568	0.00265926	0.000691477	0.151007	0.00121386	0.00315908
FCA_GND8125922_AGATTGCAGAATTGTG	0.00136821	0.00294077	0.00168357	0.132264	0.00418142	0.0487545	0.00370328	0.0133908	0.618533	0.000683323	0.00313583	0.0569454	0.00926644	0.00303578	0.0121222	0.00637613	0.00244621	0.00450458	0.000865138	0.0551319	0.00822327	0.0104447
FCA_GND8125922_AGCAGCCAGGATATAC	0.00181482	0.000356975	0.00100601	0.000975652	0.000354747	0.000279664	0.00021145	0.000344497	0.00394914	0.000782248	0.982134	0.00111425	0.000639986	0.00239831	0.000238083	0.000346138	0.00147754	0.00029007	0.000308078	0.000305202	0.000312293	0.000360853
FCA_GND8125922_AGCTCCTCATCAGTCA	0.000876453	0.000768355	0.00205064	0.034251	0.00085614	0.0901046	0.00146365	0.0101202	0.34717	0.000850526	0.000423007	0.00183209	0.00786736	0.00263082	0.269973	0.00434958	0.000947033	0.00115851	0.00104159	0.217077	0.000674316	0.00351352
FCA_GND8125922_AGCTCTCGTGAAGGCT	0.00125984	0.000761598	0.00242633	0.0468375	0.00205389	0.0786838	0.000720058	0.0260684	0.670521	0.000394194	0.000259229	0.00675109	0.00959037	0.00158939	0.0374791	0.00607349	0.000556267	0.00189023	0.000359127	0.0923501	0.000707338	0.0126676
FCA_GND8125922_AGGCCACTCCTCTAGC	0.00228387	0.0021422	0.0278784	0.104996	0.00217713	0.0633741	0.00334846	0.0143244	0.193274	0.000643661	0.000600343	0.0236848	0.015775	0.00517089	0.458329	0.0074729	0.0014037	0.00316391	0.000760366	0.0591552	0.0015047	0.00853812
FCA_GND8125922_AGGGATGTCCTTCAAT	0.00265088	0.00195011	0.0101426	0.074691	0.00316547	0.0230355	0.00699753	0.389666	0.201014	0.000701755	0.000594671	0.156062	0.00806556	0.00922683	0.0228947	0.00655001	0.000986428	0.00878327	0.000565931	0.0648645	0.00275922	0.00463165
FCA_GND8125922_AGGGTGAGTCCATGAT	0.00137897	0.00118779	0.00539392	0.0379923	0.00427703	0.068164	0.00370753	0.30097	0.416945	0.000782921	0.000840343	0.0828647	0.0248401	0.00414516	0.0149246	0.00202041	0.00121087	0.0147054	0.000664329	0.0092284	0.00171333	0.00204297
FCA_GND8125922_AGGTCATAGGAACTGC	0.00360209	0.00385805	0.00877128	0.0466464	0.00516569	0.0278894	0.00372356	0.0843934	0.539246	0.00130005	0.00116407	0.0663519	0.0215371	0.00568183	0.0458989	0.00452569	0.00173604	0.00719246	0.00183649	0.108414	0.00417165	0.00689436
FCA_GND8125922_AGGTCATCAGTCGATT	0.00603693	0.00370924	0.00522243	0.0155377	0.00629944	0.190562	0.0156622	0.0223171	0.145768	0.00428508	0.00310309	0.017088	0.00796466	0.020808	0.270649	0.0254293	0.125025	0.0185242	0.00516603	0.00946841	0.0626262	0.0187472
FCA_GND8125922_AGGTCATGTGAAAGAG	0.0059351	0.00409946	0.0634551	0.0396996	0.0043324	0.0704361	0.00427286	0.186272	0.191584	0.00141195	0.00129743	0.0833627	0.0218888	0.0393215	0.1614	0.0154924	0.00203171	0.0142429	0.00241078	0.0549085	0.0051244	0.0270204
FCA_GND8125922_AGGTCATGTTGCCTCT	0.00142557	0.00143564	0.00463729	0.0694508	0.016295	0.0296087	0.0187626	0.560734	0.140123	0.000614678	0.000404375	0.0546803	0.00704572	0.0119994	0.00990416	0.0132605	0.00131843	0.0397741	0.000451021	0.0107312	0.00411846	0.00322473
FCA_GND8125922_AGGTCCGAGAGTTGGC	0.000745643	0.000650641	0.00130994	0.022219	0.00118641	0.0180743	0.00748659	0.00400448	0.0824685	0.000575552	0.000537497	0.0129343	0.00903503	0.686578	0.104609	0.0239871	0.000793676	0.00479417	0.000605699	0.0154054	0.000961369	0.00103752
FCA_GND8125922_AGGTCCGGTTACCGAT	0.00213401	0.0022412	0.0151666	0.0496521	0.00285068	0.0465548	0.00248303	0.155412	0.368471	0.000658569	0.000807158	0.223188	0.0129225	0.0161432	0.0524835	0.00614686	0.00114212	0.0062804	0.000698691	0.0265867	0.00156324	0.0064132
FCA_GND8125922_AGGTCCGGTTGCCTCT	0.00318035	0.0012933	0.0256031	0.100065	0.00566009	0.100408	0.00145118	0.00989273	0.572944	0.000555085	0.00131587	0.0430361	0.0244471	0.00369851	0.0839921	0.00379989	0.000737617	0.00206463	0.000639341	0.0110514	0.00131907	0.00284536
FCA_GND8125922_AGGTCCGTCATCTGTT	0.00359964	0.00166315	0.0324885	0.0608779	0.00374789	0.0509778	0.00466521	0.244794	0.217372	0.000614148	0.000462393	0.235193	0.0106969	0.0195613	0.0240729	0.00479362	0.00138639	0.015968	0.000535277	0.0557145	0.00357985	0.00723636
FCA_GND8125922_AGTAGTCAGAAACGAG	0.00142833	0.00126773	0.00272702	0.0478327	0.0188343	0.0436378	0.00605821	0.522492	0.221665	0.000774584	0.000377606	0.0829552	0.00741103	0.00365901	0.00395717	0.00505236	0.00123693	0.0166333	0.000295046	0.00656496	0.00276188	0.00237714
FCA_GND8125922_AGTAGTCCATTGCGGC	0.00931755	0.00375544	0.00337199	0.265025	0.0146546	0.266243	0.0660985	0.00791939	0.136504	0.00375396	0.00311212	0.0085391	0.0128342	0.00320102	0.00377927	0.0275744	0.00555161	0.010344	0.00246073	0.0656264	0.0645546	0.0157783
FCA_GND8125922_AGTAGTCTCCAAGTAC	0.00729565	0.00220716	0.0197647	0.074348	0.00795429	0.105064	0.00237417	0.0142069	0.317267	0.00112895	0.0014001	0.146674	0.0190617	0.00873759	0.229186	0.0123486	0.00181404	0.00502758	0.00198923	0.0150037	0.00351842	0.00362811
FCA_GND8125922_AGTCTTTTCGATGAGG	0.002253	0.00173333	0.00602384	0.0941551	0.00512267	0.0324189	0.0184375	0.0262462	0.640238	0.000741586	0.00204646	0.0496793	0.0219381	0.00628269	0.00519719	0.00553165	0.00137752	0.00598741	0.00083379	0.0615783	0.00803403	0.00414376
FCA_GND8125922_AGTGAGGTCACTTCAT	0.00040098	0.000649807	0.00164101	0.0357471	0.0025827	0.0117841	0.780181	0.00148472	0.12644	0.00030553	0.000305754	0.00408378	0.00161233	0.0010187	0.00185638	0.00407331	0.000911577	0.00119241	0.000214101	0.00493789	0.0166651	0.00191211
FCA_GND8125922_AGTGGGAAGCTGCCCA	0.00532587	0.000991381	0.00167063	0.0203699	0.000615076	0.67567	0.000873071	0.000666096	0.127436	0.000327358	0.000942708	0.00154227	0.00186979	0.000569877	0.00053714	0.00234646	0.000995753	0.000419355	0.000764183	0.00778856	0.134818	0.0134594
FCA_GND8125922_AGTTGGTCAGCCTGTG	1.3929e-05	1.52991e-05	6.9127e-06	8.11158e-05	1.23831e-05	0.000203585	4.2131e-05	1.74499e-05	0.000392053	0.997585	0.000357443	8.21054e-05	5.76455e-05	0.000179091	2.03828e-05	4.89146e-05	8.62454e-05	7.68625e-06	1.75753e-05	0.000187968	5.64777e-05	0.000528805
FCA_GND8125922_ATAAGAGCAGTACACT	0.00391378	0.00183112	0.006172	0.1402	0.00629373	0.215577	0.00209187	0.0170459	0.446065	0.000943015	0.000974338	0.0622907	0.0116673	0.00568323	0.00587809	0.00679235	0.00334326	0.00492624	0.000868736	0.0492424	0.00478329	0.00341706
FCA_GND8125922_ATAAGAGCATGCCACG	0.00902564	0.00427657	0.0144619	0.077669	0.0164222	0.0772198	0.0159388	0.1634	0.240548	0.00231182	0.00209969	0.078953	0.0177155	0.0138981	0.0229518	0.0197942	0.00346719	0.0182286	0.00250887	0.118961	0.0186399	0.0615081
FCA_GND8125922_ATAAGAGGTAATCGTC	0.0333184	0.00146999	0.002916	0.00832904	0.00285153	0.0802556	0.00297222	0.00414446	0.0507206	0.00132263	0.00139987	0.0058907	0.00418358	0.00217186	0.00179576	0.00385596	0.00186737	0.00190434	0.002118	0.0719195	0.666893	0.0476992
FCA_GND8125922_ATCACGAAGCTAGTCT	0.00700243	0.00552797	0.00679384	0.0791183	0.17411	0.180296	0.0102341	0.0285767	0.31134	0.00399886	0.00552381	0.032386	0.0167414	0.0103691	0.0198073	0.0157261	0.00739132	0.0209142	0.00435515	0.0380356	0.00818684	0.0135652
FCA_GND8125922_ATCATCTAGGGTGTTG	0.00357984	0.00650956	0.222082	0.0489196	0.00567476	0.0587146	0.00119844	0.137784	0.124279	0.000847868	0.00064173	0.268252	0.00801287	0.0325309	0.0464143	0.00289329	0.00113347	0.00758944	0.00112701	0.0114487	0.0030226	0.00734292
FCA_GND8125922_ATCATCTTCTGCCAGG	5.28317e-05	8.68777e-05	0.000123618	0.000511816	0.000105954	0.00261515	0.000114708	0.000371255	0.00151763	0.000118441	2.98945e-05	0.00138056	0.000646752	0.849075	0.1394	0.000117194	3.29157e-05	0.000384627	1.93285e-05	0.00322012	5.17481e-05	2.39802e-05
FCA_GND8125922_ATCATGGCACACCGAC	0.00609137	0.00256632	0.0079746	0.0818471	0.00585741	0.162874	0.00745892	0.0712768	0.319506	0.00381772	0.00179677	0.12879	0.0100561	0.0329447	0.102306	0.00575018	0.00620892	0.0229016	0.00219594	0.0102579	0.0031145	0.00440729
FCA_GND8125922_ATCCGAATCTCTGCTG	1.44269e-05	5.67533e-05	0.000134281	0.00116805	6.89056e-05	0.00244017	0.000282105	0.000266378	0.0078503	1.49687e-05	3.82283e-05	0.000134778	0.000334059	0.000117206	0.981257	9.69931e-05	5.05279e-05	8.50772e-05	2.60289e-05	0.00462024	4.89921e-05	0.000894057
FCA_GND8125922_ATCTACTTCCCTCTTT	9.33105e-05	5.19921e-05	0.000287755	6.26864e-06	6.98189e-05	0.000192263	3.61314e-05	1.54497e-05	7.06823e-06	0.00024426	0.000227829	2.23886e-05	3.71049e-05	3.54604e-05	2.75887e-05	2.70226e-05	0.000123011	2.67088e-05	0.998273	3.48662e-05	0.000119233	4.17277e-05
FCA_GND8125922_ATCTGCCCATGCCTAA	0.000439856	0.000676683	0.00130279	0.0131686	0.000688043	0.372855	0.00303558	0.00120733	0.328969	0.000372992	0.000336954	0.00371288	0.00242303	0.000912648	0.219032	0.00382472	0.00738867	0.00115703	0.000524987	0.00592742	0.00905205	0.0229914
FCA_GND8125922_ATGAGGGCAAGCGTAG	0.00104617	0.00136475	0.00516423	0.0116847	0.00101529	0.0216582	0.00129718	0.00762625	0.0464119	0.000139325	0.000146762	0.014604	0.0025497	0.0506101	0.82104	0.000910824	0.000411145	0.00265026	0.000138049	0.00645539	0.00102346	0.00205232
FCA_GND8125922_ATGGGAGAGGGCATGT	0.000365296	0.000637539	0.018866	0.00530392	0.00050667	0.00692504	0.000438509	0.0402619	0.00655623	0.000296999	0.000253498	0.0139607	0.00669734	0.138455	0.743128	0.000808827	0.000289087	0.00341663	0.000291473	0.0108407	0.000632986	0.00106807
FCA_GND8125922_ATTACTCGTTAAGATG	0.00236917	0.00196791	0.00377691	0.135086	0.00730472	0.0444994	0.00758128	0.0546769	0.534051	0.00141943	0.00128641	0.022669	0.0217419	0.00376602	0.0130953	0.0127605	0.00160142	0.0044819	0.00115671	0.109983	0.00207307	0.0126524
FCA_GND8125922_ATTGGACCACAGACAG	0.00513321	0.00245869	0.00565578	0.055551	0.00415799	0.0911406	0.0081608	0.0067864	0.162971	0.00260337	0.00147865	0.00438515	0.0156291	0.00315044	0.00345949	0.0124222	0.00268607	0.00396896	0.0153349	0.129145	0.423472	0.0402497
FCA_GND8125922_ATTGGTGGTCCCTACT	0.00221163	0.00297694	0.0836159	0.0947027	0.00533274	0.127188	0.0041519	0.0131989	0.251116	0.00141687	0.00108128	0.249666	0.0202062	0.0061215	0.10187	0.00946589	0.00145013	0.00363202	0.00106768	0.00988228	0.00411073	0.00553512
FCA_GND8125922_ATTGGTGGTCGAACAG	0.00511231	0.00313882	0.0184919	0.0997288	0.00848285	0.0414117	0.0376294	0.0586196	0.181299	0.00193398	0.00183582	0.245775	0.0252734	0.0145402	0.0183298	0.0148028	0.00243135	0.010811	0.00182914	0.185767	0.008203	0.014552
FCA_GND8125922_ATTTCTGGTAATTGGA	0.0039806	0.00204613	0.0730709	0.0199335	0.00337904	0.0323574	0.0052376	0.258025	0.0826206	0.000814965	0.000630183	0.260049	0.0114002	0.0344651	0.047271	0.00776978	0.00116505	0.018492	0.000896471	0.111135	0.00491472	0.020346
FCA_GND8125922_CAACCAACAAGCGCTC	0.00259193	0.0035531	0.0107445	0.0360964	0.0053287	0.0147553	0.0114939	0.207243	0.0477355	0.00102437	0.00130301	0.543681	0.00616311	0.0257384	0.012225	0.0123981	0.00141993	0.00389252	0.000946869	0.0456264	0.00239419	0.00364529
FCA_GND8125922_CAACTAGCAGATCGGA	0.00298736	0.00120554	0.00441966	0.089668	0.00840745	0.0417428	0.00171491	0.0491981	0.636885	0.000778473	0.00121459	0.102332	0.0185641	0.00450726	0.00975774	0.00386073	0.00099593	0.00464283	0.000590584	0.012612	0.00188316	0.00203168
FCA_GND8125922_CAACTAGTCCTTTCTC	0.00170087	0.00176262	0.0136705	0.156682	0.00397948	0.141277	0.00225115	0.00569413	0.332486	0.00123855	0.00103323	0.0157497	0.0108835	0.00395193	0.25365	0.00477729	0.00123095	0.00259662	0.00105198	0.0391529	0.0014273	0.00375303
FCA_GND8125922_CAAGAAAAGCCACGCT	0.00563902	0.0019028	0.073978	0.0314112	0.00416895	0.0332464	0.00976637	0.0467017	0.169612	0.000819456	0.000685167	0.453838	0.010757	0.0249044	0.0712047	0.00430162	0.00146836	0.00750972	0.000851569	0.0383772	0.00465142	0.00420428
FCA_GND8125922_CAAGAAAAGTGGTAGC	0.00155591	0.0011361	0.00571394	0.0712521	0.00368498	0.0596908	0.00236634	0.384972	0.317079	0.00079969	0.000838559	0.0573437	0.0223321	0.0137539	0.0118732	0.013679	0.00153452	0.00887338	0.000737855	0.0122197	0.00186911	0.0066941
FCA_GND8125922_CAAGATCAGGGTCTCC	0.00314911	0.00336227	0.015877	0.0669059	0.00575462	0.084845	0.0147033	0.0330232	0.237508	0.00198358	0.00178451	0.104121	0.0126293	0.0124539	0.292613	0.016046	0.00239451	0.00795738	0.00213505	0.057259	0.00753326	0.0159605
FCA_GND8125922_CAAGATCGTAAATGTG	0.0100524	0.00254976	0.020962	0.0651518	0.00890655	0.0281991	0.00849113	0.0486853	0.273154	0.00113584	0.00110424	0.32478	0.0283129	0.0177962	0.0567424	0.0128521	0.0014364	0.014594	0.001563	0.0652623	0.00374359	0.00452554
FCA_GND8125922_CAAGATCGTTCACCTC	0.00260476	0.00573183	0.0502721	0.0959017	0.00444762	0.0466633	0.0108219	0.168803	0.125426	0.00126831	0.00117722	0.0749253	0.0196362	0.0122561	0.322725	0.0127234	0.00195245	0.00678247	0.00133612	0.0244211	0.00244247	0.00768154
FCA_GND8125922_CAAGGCCAGAAACCTA	0.00159826	0.0134579	0.0378542	0.0347434	0.00138096	0.0975397	0.00138947	0.00317247	0.149713	0.000792567	0.000565138	0.0366319	0.00853224	0.00292775	0.570231	0.00218744	0.000830788	0.00165608	0.00125607	0.0296433	0.00149831	0.00239802
FCA_GND8125922_CAAGGCCTCATGTCCC	0.00358054	0.00400274	0.00767206	0.0759108	0.00678477	0.150457	0.010566	0.163732	0.244305	0.00429066	0.00243804	0.0952674	0.00686734	0.0136499	0.0608296	0.0829554	0.00479132	0.0221454	0.00195321	0.015885	0.00677344	0.0151428
FCA_GND8125922_CAAGTTGAGGGCATGT	0.00831063	0.00263921	0.0489095	0.0540466	0.00358073	0.0525197	0.0109388	0.0390163	0.147833	0.00150249	0.00124236	0.0974248	0.0100221	0.337084	0.135048	0.00546149	0.00211001	0.0100637	0.00146241	0.0225574	0.00390864	0.00431844
FCA_GND8125922_CACAAACCAAACCTAC	0.00180873	0.00142764	0.00224719	0.086206	0.00316117	0.0286166	0.00374047	0.00459617	0.550452	0.000880556	0.00121669	0.00396932	0.00735134	0.00172853	0.093113	0.0151504	0.00113796	0.00161474	0.00120553	0.129582	0.00202862	0.0587661
FCA_GND8125922_CACACAAAGCGAGAAA	0.0129866	0.00916472	0.0133985	0.0381683	0.0476419	0.188803	0.0233529	0.0240266	0.124071	0.0101609	0.00662558	0.0571557	0.0308777	0.167282	0.071025	0.0415626	0.00986768	0.0165581	0.00763751	0.0806396	0.00888668	0.0101077
FCA_GND8125922_CACACAAAGGCAATTA	0.00274307	0.00115173	0.00196584	0.00874794	0.00154988	0.0672524	0.00452581	0.00926919	0.146985	0.000606472	0.000280472	0.00365112	0.00358116	0.0103997	0.69618	0.00630102	0.00376722	0.00456868	0.000420987	0.00997363	0.00617333	0.00990581
FCA_GND8125922_CACACCTCAGCCTTGG	0.000792013	0.000514532	0.0040626	0.0192346	0.000700291	0.0136753	0.00339584	0.00555262	0.0296903	0.000294173	0.000177262	0.0401029	0.00516347	0.784225	0.0613562	0.00575653	0.000518291	0.00310039	0.000232932	0.0202262	0.000595454	0.000633578
FCA_GND8125922_CACACTCGTTCGGGCT	0.00321652	0.00148974	0.00395279	0.00425238	0.0334693	0.00983038	0.00229784	0.375693	0.0356907	0.000632448	0.000541981	0.054345	0.0145994	0.00599134	0.00768613	0.00260166	0.00141455	0.425065	0.000656798	0.0124644	0.00210493	0.00200443
FCA_GND8125922_CACAGTAGTGTGGCTC	0.00700657	0.00704377	0.0155253	0.0265203	0.00686086	0.115348	0.0107972	0.0265424	0.39804	0.0150954	0.042	0.0364619	0.110178	0.00972586	0.0283802	0.0345061	0.0219304	0.0130019	0.00487209	0.0304761	0.015758	0.0239297
FCA_GND8125922_CACTCCAGTGAGGGTT	0.0134608	0.0304349	0.0157078	0.0482738	0.0694312	0.0732464	0.0136367	0.0246917	0.234699	0.00623359	0.00499335	0.0300263	0.0247434	0.0124319	0.0650396	0.0133234	0.00910449	0.0266887	0.00769447	0.250156	0.011947	0.0140352
FCA_GND8125922_CAGAATCGTAGCGTAG	0.00702889	0.00440814	0.00898362	0.120209	0.0938744	0.0800692	0.0140233	0.0323787	0.399995	0.00261873	0.00243314	0.0763265	0.00895312	0.00904911	0.0217128	0.0080206	0.00334738	0.0130173	0.00246381	0.0730293	0.00569014	0.0123677
FCA_GND8125922_CAGATCACAATAGCAA	0.00125952	0.000974892	0.00129046	0.0830899	0.00434032	0.0240798	0.00134291	0.147065	0.653542	0.000545783	0.000442002	0.0336754	0.010193	0.00114509	0.00105509	0.0162522	0.000838517	0.0045848	0.000369373	0.0121462	0.000969208	0.000798289
FCA_GND8125922_CAGATCACAGGGTATG	0.00309129	0.000716373	0.000734238	0.000353949	0.000450513	0.000485906	0.000439244	0.000281365	0.000997008	0.00126208	0.977994	0.00142067	0.000507504	0.00553065	0.000273521	0.000573836	0.00222472	0.000362291	0.000562858	0.000527647	0.000533807	0.00067607
FCA_GND8125922_CAGCATACACGGTAAG	0.00114302	0.000910953	0.00198716	0.00635353	0.00130999	0.00988416	0.00263265	0.00231776	0.010623	0.00115674	0.00094223	0.0122317	0.00623686	0.537199	0.364202	0.00707971	0.00221606	0.00147029	0.000868125	0.0267012	0.00125972	0.00127436
FCA_GND8125922_CAGCATATCTCGCATC	0.00365573	0.00343892	0.00368019	0.348546	0.0062736	0.212111	0.0149275	0.00624565	0.261358	0.015713	0.00667262	0.00757981	0.0113921	0.00354674	0.00506007	0.0237843	0.0186817	0.00453612	0.00244052	0.0133644	0.0158079	0.0111846
FCA_GND8125922_CAGCCGATCACGGTTA	0.00326433	0.00459254	0.0586271	0.0285477	0.00541054	0.137035	0.00440407	0.135698	0.0658585	0.00252384	0.00240381	0.203857	0.0117515	0.0354074	0.25696	0.00712201	0.00296257	0.00588763	0.00267906	0.012249	0.00388342	0.00887429
FCA_GND8125922_CAGCGACAGTGAACAT	0.0048158	0.00160845	0.00247083	0.11174	0.0115506	0.0369741	0.00542685	0.0858022	0.577933	0.00147088	0.00101674	0.076025	0.0277803	0.00411364	0.0122818	0.00844485	0.00102094	0.00659132	0.000582754	0.0152917	0.00431296	0.0027451
FCA_GND8125922_CAGCTAAGTACGCACC	0.0019487	0.00199814	0.00430642	0.10971	0.0043065	0.198905	0.0046595	0.0104561	0.450727	0.00149714	0.00136137	0.0329764	0.00462508	0.00232442	0.0123355	0.0037991	0.00408615	0.00251726	0.00172638	0.11649	0.0102488	0.0189959
FCA_GND8125922_CAGCTAAGTGAGTGAC	0.00611533	0.00530931	0.00740325	0.051768	0.00436276	0.368843	0.00834307	0.0136132	0.221926	0.00784647	0.00170842	0.0147323	0.0107691	0.0829149	0.125127	0.0178566	0.00444135	0.00672956	0.00253697	0.0296743	0.00409381	0.00388559
FCA_GND8125922_CAGCTAATCTGCAAGT	0.00900682	0.00235853	0.0135445	0.0897002	0.0201375	0.109676	0.00477402	0.233423	0.338731	0.00188622	0.00147873	0.077034	0.0126637	0.00902229	0.00704805	0.00971519	0.00274767	0.010875	0.00166014	0.0362862	0.00342812	0.00480249
FCA_GND8125922_CAGCTGGAGTCGCCGT	0.00869781	0.00934325	0.014469	0.0345212	0.0319306	0.103041	0.0123686	0.0302125	0.241952	0.00920505	0.00558283	0.0579638	0.0170656	0.211836	0.0413107	0.0164588	0.00671027	0.0156963	0.00623561	0.107006	0.00802554	0.0103679
FCA_GND8125922_CAGCTGGTCTATCCCG	0.00337703	0.0017973	0.00201409	0.0118931	0.0031268	0.0702647	0.00531546	0.00327795	0.0363761	0.00177955	0.000785495	0.0114739	0.0132637	0.602064	0.19756	0.00951324	0.00175434	0.00260217	0.000803248	0.0175724	0.00200386	0.00138235
FCA_GND8125922_CAGGTGCAGCTCTCGG	0.011929	0.00173334	0.0292483	0.0761525	0.00477389	0.113296	0.00528913	0.0263279	0.313793	0.00115529	0.000850875	0.15163	0.0154819	0.0198368	0.0723633	0.00843934	0.00187141	0.00667112	0.00109371	0.121705	0.00630782	0.0100505
FCA_GND8125922_CAGGTGCGTATAGGTA	0.00492889	0.00394401	0.00945466	0.0310167	0.00657191	0.161912	0.0066386	0.0280059	0.260739	0.00308943	0.0033829	0.0195438	0.0096104	0.00919127	0.298646	0.0186309	0.00527857	0.00776325	0.00471229	0.0298674	0.0155786	0.0614937
FCA_GND8125922_CAGGTGCGTGTTGAGG	0.00297094	0.00240669	0.0677364	0.0253825	0.00199287	0.0339886	0.0108913	0.0193714	0.0645521	0.000985618	0.000946395	0.419713	0.0062906	0.0891702	0.178689	0.00811537	0.00207178	0.00826263	0.00126947	0.0340001	0.00503434	0.0161591
FCA_GND8125922_CAGGTGCGTTTGTTGG	0.0067677	0.00149182	0.00218376	0.0482357	0.00207416	0.543031	0.00486252	0.00250404	0.0960759	0.0014839	0.00125546	0.00293375	0.00429944	0.00152684	0.00193278	0.00311056	0.00947479	0.00160103	0.0045123	0.0266611	0.221634	0.012347
FCA_GND8125922_CAGTAACAGACTGTAA	0.0332404	0.003041	0.00420081	0.0590527	0.0244096	0.312706	0.0072567	0.00732104	0.166431	0.00275807	0.00287963	0.00899891	0.00876893	0.00367753	0.00430821	0.00578552	0.00507476	0.0117955	0.00863092	0.0882728	0.195103	0.0362864
FCA_GND8125922_CAGTCCTCATAAAGGT	0.00391605	0.000427871	0.000617552	0.0256652	0.00563149	0.0295545	0.000829235	0.00561713	0.893128	0.000735596	0.000154925	0.00309989	0.00163679	0.000815047	0.00811093	0.00409989	0.000276846	0.000752464	0.000170764	0.0131537	0.000620401	0.000985573
FCA_GND8125922_CAGTCCTTCAAGGCTT	0.00542141	0.00779648	0.00755706	0.142897	0.00763228	0.233888	0.205934	0.0094882	0.198467	0.00568295	0.00391874	0.0110608	0.0158109	0.00620384	0.0107267	0.0225315	0.00832492	0.0057747	0.00565493	0.0204415	0.0456718	0.0191157
FCA_GND8125922_CAGTCCTTCTGCGGCA	0.00146793	0.00137421	0.00257586	0.0753016	0.0020172	0.0917898	0.00352788	0.00257176	0.301732	0.00123678	0.000620277	0.00204188	0.00257863	0.00188301	0.38486	0.0057	0.000784414	0.00117644	0.00103991	0.108919	0.00100791	0.00579276
FCA_GND8125922_CATATGGCAGCTATTG	0.00034435	0.000255696	0.000452923	0.00366852	0.000572422	0.010107	0.0016368	0.000796219	0.0239023	0.000315772	9.01574e-05	0.00889794	0.00190632	0.921394	0.0148007	0.00449258	0.000145816	0.000937843	8.84315e-05	0.00486043	0.000189919	0.000143947
FCA_GND8125922_CATCAAGTCGCCTGTT	8.86632e-05	0.000392049	0.000223508	0.00460908	0.000164612	0.794639	0.00161912	0.000277623	0.148064	0.000550566	0.000184945	0.00127617	0.000969096	0.000221754	0.0182525	0.00254807	0.00594952	0.000474161	0.00026055	0.00174753	0.0104108	0.00707718
FCA_GND8125922_CATCAGAAGCAGCCTC	0.00454198	0.00141518	0.0315919	0.0894191	0.004797	0.102222	0.00754772	0.0100734	0.380203	0.000743985	0.000519532	0.237677	0.0118706	0.00791282	0.0581126	0.00577091	0.00136318	0.00336558	0.000598399	0.0261717	0.00890708	0.00517569
FCA_GND8125922_CATCAGATCCTCGCAT	0.00300281	0.00338362	0.0160603	0.0416711	0.00708827	0.0557012	0.0190689	0.0682576	0.112066	0.0016693	0.00147035	0.426805	0.00819724	0.0143651	0.0141986	0.00938798	0.00273972	0.0119458	0.00153711	0.138774	0.0111002	0.0315102
FCA_GND8125922_CATCCACCATCACGAT	0.0020776	0.00197736	0.0027163	0.0148465	0.00244994	0.17339	0.00500275	0.00312583	0.200373	0.00165646	0.0015503	0.00531092	0.00295992	0.00369229	0.508385	0.0044746	0.0119726	0.00221719	0.00179732	0.00956129	0.00636681	0.0340965
FCA_GND8125922_CATCCACGTATAAACG	0.00388813	0.00314549	0.199863	0.0398776	0.00370935	0.0356821	0.00515156	0.162644	0.0754479	0.000657404	0.000519927	0.18266	0.0095364	0.020296	0.202356	0.00515324	0.00106105	0.0132942	0.000709086	0.0267582	0.00214666	0.00544319
FCA_GND8125922_CATGACAAGTCCGTAT	0.0024598	0.00102245	0.00176134	0.0664411	0.00290621	0.0341063	0.00161486	0.25566	0.516265	0.000687069	0.000491482	0.027501	0.015553	0.00169261	0.000933242	0.016797	0.000660109	0.00281017	0.000505911	0.0481395	0.00104984	0.000941395
FCA_GND8125922_CATTATCGTAAATACG	0.00274674	0.00228642	0.00263742	0.0254875	0.00302963	0.0269135	0.0067184	0.00775303	0.120874	0.00166985	0.00131081	0.0471124	0.0172771	0.582783	0.045646	0.00961518	0.00229838	0.0072543	0.00150499	0.0798018	0.00257517	0.00270444
FCA_GND8125922_CATTCGCGTTTAGCTG	0.00228727	0.0017234	0.00267855	0.0230602	0.0115973	0.0139083	0.0749064	0.698911	0.0787133	0.00120909	0.000856654	0.013956	0.0306263	0.00569383	0.00687598	0.00792278	0.00121695	0.0130851	0.000906126	0.00614213	0.00172314	0.00200046
FCA_GND8125922_CCAATCCGTCAGAGGT	0.0034989	0.00123275	0.0093634	0.0676675	0.0035857	0.124443	0.00418477	0.00728528	0.36132	0.000738255	0.000862016	0.117501	0.0102931	0.00493633	0.219768	0.00325103	0.00252474	0.00291239	0.000761304	0.044734	0.00333439	0.00580212
FCA_GND8125922_CCACCTAAGACCACGA	0.00570481	0.00299682	0.0124881	0.0596589	0.00587883	0.0474867	0.0195162	0.0864267	0.206387	0.0022858	0.00197251	0.0829132	0.0337457	0.286679	0.0485588	0.0164001	0.00279977	0.0262328	0.00224907	0.0420235	0.00356137	0.0040342
FCA_GND8125922_CCACCTAAGAGCTATA	0.000956535	0.000327063	0.000578913	0.00248054	0.000424549	0.0121291	0.00106171	0.000471889	0.00447053	0.000323216	0.000227692	0.005117	0.00652859	0.870335	0.0798856	0.00351097	0.000393805	0.000370957	0.000211017	0.00945596	0.000457639	0.000281447
FCA_GND8125922_CCACCTAGTGCGCTTG	0.00335389	0.000684396	0.0069268	0.0793171	0.00237901	0.228244	0.000817033	0.0216887	0.486681	0.000625331	0.000583339	0.107188	0.00986954	0.00681255	0.00999033	0.00377201	0.00139822	0.00217615	0.00068006	0.0191459	0.00316937	0.00449699
FCA_GND8125922_CCACGGAGTAGCGCAA	0.00512397	0.0066546	0.0124826	0.0456726	0.0370698	0.139212	0.00862971	0.0267179	0.490192	0.00288283	0.0023048	0.0196543	0.00930823	0.00818327	0.0826473	0.00852721	0.0030359	0.00998924	0.00290292	0.0645005	0.00361783	0.0106894
FCA_GND8125922_CCACTACTCCATGCTC	0.107323	0.000425684	0.000501185	0.000124328	6.61073e-05	0.000336141	0.000127668	6.52448e-05	6.32726e-05	0.000400283	0.000918494	0.000113595	9.59657e-05	0.000113402	0.000564733	0.000172272	0.000352049	6.93015e-05	0.877728	0.00888356	0.0014451	0.00011066
FCA_GND8125922_CCACTACTCTAGCACA	0.00395019	0.00300624	0.0148114	0.0215329	0.0160188	0.0412747	0.298266	0.324725	0.101268	0.00292946	0.00185366	0.0454982	0.0269068	0.00914214	0.00902325	0.0233078	0.00697368	0.0271037	0.00191668	0.00771981	0.00530761	0.00746337
FCA_GND8125922_CCAGCGATCCCAAGAT	0.0004694	0.00040144	0.0011872	0.0111542	0.00127125	0.0195778	0.00382311	0.00450548	0.0477003	0.00030057	0.000171431	0.0110457	0.00529743	0.785827	0.0852333	0.00769173	0.00031268	0.00339747	0.000200783	0.00943965	0.000512512	0.000479944
FCA_GND8125922_CCATTCGTCCCATTTA	0.00067385	0.00121584	0.00487456	0.0427205	0.00106978	0.063499	0.00111139	0.0149164	0.543277	0.000445654	0.000441785	0.0142947	0.00312477	0.0029318	0.270318	0.00273978	0.000765461	0.00135845	0.00256877	0.0211556	0.00115875	0.00533861
FCA_GND8125922_CCATTCGTCTCAAGTG	0.00308748	0.00351884	0.493664	0.00511784	0.000664951	0.00337036	0.000868618	0.00104224	0.00458168	0.000366105	0.000365987	0.0575415	0.00258023	0.0509221	0.364875	0.000598024	0.000509654	0.00105971	0.000345189	0.00366951	0.000532856	0.000718374
FCA_GND8125922_CCCAGTTTCATAGCAC	0.00730157	0.00785254	0.0201881	0.103726	0.0697264	0.116737	0.0194636	0.0304646	0.339562	0.00380612	0.00339925	0.0897848	0.0135003	0.0119253	0.072612	0.00904277	0.00444018	0.0159652	0.00370176	0.040167	0.00612702	0.0105069
FCA_GND8125922_CCCATACGTGGCCCTA	0.0149531	0.0046457	0.0109499	0.0836226	0.0117616	0.106566	0.00295574	0.0770788	0.329178	0.00203335	0.00179999	0.240334	0.0137608	0.0148712	0.00977087	0.00618823	0.00310928	0.00829707	0.0021389	0.0281145	0.0120379	0.0158328
FCA_GND8125922_CCGGGATAGGGTTTCT	0.00582223	0.00109168	0.010507	0.111107	0.00437906	0.108666	0.00259389	0.0158595	0.485122	0.000789653	0.000867536	0.101602	0.0307616	0.0042131	0.0241881	0.0042554	0.00153566	0.0044232	0.000792306	0.0736036	0.00366986	0.00414956
FCA_GND8125922_CCGGGATGTAAACACA	0.00188992	0.00159019	0.00511141	0.0356017	0.00611341	0.0374562	0.00233664	0.314207	0.412081	0.000493712	0.000761877	0.0319553	0.0275945	0.00583612	0.0545345	0.0201049	0.000750061	0.00737827	0.000620045	0.0173906	0.00177877	0.0144134
FCA_GND8125922_CCGGGATGTAAGTAGT	0.00473116	0.00380315	0.0136938	0.0088297	0.00565249	0.0153774	0.016512	0.464019	0.100703	0.00256207	0.00236005	0.0622628	0.0216702	0.122531	0.0305463	0.0163253	0.00305604	0.0857382	0.00491514	0.00619414	0.00416475	0.00435218
FCA_GND8125922_CCGTGGATCTGGCGTG	0.00474659	0.00278861	0.0219919	0.0527782	0.00481357	0.0274361	0.00847371	0.361096	0.125325	0.000636324	0.000435795	0.227341	0.0110284	0.025851	0.0323717	0.00816998	0.00101438	0.0198239	0.000532287	0.0514942	0.00470518	0.00714646
FCA_GND8125922_CCGTTCAAGCAGACTG	0.00308337	0.00170153	0.00456613	0.0812186	0.00353308	0.225517	0.00207285	0.0244466	0.528679	0.00110684	0.000778766	0.0363014	0.0113399	0.00583727	0.00566564	0.00568663	0.00210969	0.0030082	0.000792976	0.0482569	0.00204199	0.00225603
FCA_GND8125922_CCTAAAGAGGCTCTTA	0.00454088	0.000905967	0.00336279	0.110124	0.00297009	0.12566	0.0017294	0.00135654	0.542839	0.000534216	0.00155975	0.0516495	0.0152265	0.00240526	0.0346126	0.00425908	0.00173886	0.00204962	0.000648148	0.0805378	0.00479062	0.00649862
FCA_GND8125922_CCTACCACATTGGCGC	0.000357539	0.000272186	0.00145041	0.00427199	0.000511913	0.00852279	0.00195724	0.00175881	0.00588592	0.000170646	0.000117648	0.0129884	0.00432672	0.890928	0.0413708	0.0027584	0.000297255	0.00174619	0.000106272	0.0194251	0.000464171	0.00031156
FCA_GND8125922_CCTACCATCATCGCTC	0.0013723	0.000755873	0.00451733	0.00520302	0.00668482	0.0175703	0.00159798	0.740625	0.0237606	0.000428661	0.000310219	0.0787658	0.00834723	0.00950051	0.0103391	0.00229497	0.000600198	0.0668284	0.000380497	0.0163138	0.00122502	0.0025781
FCA_GND8125922_CCTAGCTCACGAAAGC	0.000735915	0.000277408	0.00116608	0.00132784	0.000672931	0.00584283	0.000501134	0.00207702	0.00424305	0.000125103	0.000103964	0.0217684	0.00524631	0.92339	0.0235708	0.00104235	0.000229141	0.00132476	0.000105777	0.00527868	0.000628398	0.000342449
FCA_GND8125922_CCTAGCTCATCACGTA	0.00422574	0.00480754	0.00499953	0.0907455	0.0252576	0.108363	0.0127614	0.0171539	0.406407	0.00354187	0.00351695	0.00668752	0.0253579	0.00519008	0.00806016	0.203045	0.00367871	0.00872282	0.00368343	0.0354806	0.00515211	0.0131617
FCA_GND8125922_CCTATTAGTCGACTGC	0.000379522	0.00012491	0.000597769	0.000780164	0.000189469	0.00474727	0.000548451	0.000573241	0.00145902	9.63448e-05	6.66243e-05	0.0556078	0.00595085	0.912497	0.00426877	0.00319095	0.00011618	0.000324485	5.70336e-05	0.00821652	0.00011933	8.82342e-05
FCA_GND8125922_CCTCTGAGTCCGAATT	0.0106254	0.00884413	0.0203538	0.0391009	0.0142373	0.0440507	0.0217537	0.0732211	0.231486	0.00670559	0.00558521	0.0705759	0.0284916	0.165054	0.0531968	0.0646421	0.00722625	0.040229	0.00630594	0.068297	0.00977142	0.0102468
FCA_GND8125922_CCTTACGGTAGCGTCC	0.00137575	0.00277204	0.0349476	0.0452617	0.00111401	0.0484334	0.00237462	0.000927514	0.0702447	0.000340658	0.000469336	0.0600253	0.00734202	0.00303277	0.706089	0.00150452	0.000563585	0.000763425	0.000509426	0.00919669	0.000767779	0.00194436
FCA_GND8125922_CCTTACGTCCCTAATT	0.000635015	0.00120784	0.00221434	0.142967	0.00600001	0.0528375	0.00591252	0.115552	0.581298	0.000624072	0.000596298	0.0245812	0.00471559	0.00306044	0.0133436	0.0069531	0.000863276	0.00646358	0.000328276	0.0268496	0.000724173	0.00227234
FCA_GND8125922_CCTTCCCAGCAGCGTA	0.00253325	0.00119221	0.00494604	0.017079	0.0161846	0.0205066	0.00200089	0.655419	0.0951558	0.0006301	0.000663849	0.1074	0.00438593	0.00463523	0.0128691	0.00247425	0.00117476	0.0409921	0.000549683	0.00568674	0.00118758	0.00233389
FCA_GND8125922_CCTTCCCAGCTAGTGG	0.000563387	0.000109161	0.00122009	2.26463e-05	3.86149e-05	0.000491588	3.06783e-05	4.72978e-05	2.50279e-05	0.000156502	0.000221548	5.4988e-05	6.91584e-05	5.94562e-05	7.55453e-05	2.93396e-05	7.62317e-05	2.08446e-05	0.996504	7.54449e-05	4.17508e-05	6.66288e-05
FCA_GND8125922_CCTTCCCCAGCTGCAC	0.000398978	0.000438769	0.0013973	0.132249	0.00169028	0.0706114	0.000784489	0.000965643	0.653204	0.000275405	0.000800864	0.00131584	0.00316514	0.000663243	0.110078	0.0053961	0.000361138	0.000444412	0.000381201	0.0121949	0.000446131	0.00273755
FCA_GND8125922_CCTTCCCCAGGTCTCG	0.0108581	0.00663684	0.129066	0.0503248	0.00753669	0.0819632	0.0118148	0.0114279	0.0660411	0.0069838	0.00411522	0.182955	0.0940183	0.0196167	0.245343	0.0157945	0.00480542	0.010037	0.00494281	0.0174433	0.00985336	0.008422
FCA_GND8125922_CCTTTCTAGGCGATAC	0.0027097	0.000947688	0.0108878	0.0392704	0.00406201	0.0519038	0.0113636	0.328567	0.295892	0.000741319	0.000526431	0.0910716	0.0209447	0.00514366	0.0204257	0.00473242	0.000947177	0.0121226	0.000653663	0.0894003	0.00194385	0.0057427
FCA_GND8125922_CCTTTCTCAGCAGTTT	0.00194397	0.00571212	0.0101418	0.12859	0.00282944	0.416872	0.00174138	0.0015305	0.192731	0.00164148	0.000863029	0.0868983	0.00898002	0.00266673	0.0859242	0.00278816	0.0032759	0.00120467	0.0012838	0.0202274	0.00639058	0.0157642
FCA_GND8125922_CGACCTTCACGAGGTA	0.001602	0.00156724	0.00137415	0.0202078	0.001315	0.0130702	0.00329867	0.00227031	0.220055	0.696087	0.00970528	0.00228865	0.00333243	0.00173058	0.00660114	0.00470089	0.00270517	0.00119076	0.000856875	0.00285758	0.00168063	0.00150285
FCA_GND8125922_CGACCTTCATTCGACA	0.000910157	0.00142341	0.0188091	0.0741915	0.00346196	0.113537	0.00258645	0.0526797	0.348485	0.000541996	0.000824384	0.217637	0.0072295	0.00672618	0.112071	0.00955472	0.001074	0.00558262	0.000446654	0.0166561	0.00159784	0.00397415
FCA_GND8125922_CGAGAAGAGAGGTTAT	0.00349587	0.00295691	0.00659021	0.112257	0.00595845	0.0258737	0.211274	0.182111	0.241943	0.00156933	0.00158386	0.0700183	0.0132387	0.0148989	0.0250905	0.0136011	0.00414307	0.0157231	0.00148455	0.0372766	0.00353427	0.00537634
FCA_GND8125922_CGAGAAGGTGCACCAC	0.00504826	0.00164588	0.0156559	0.0935287	0.0047314	0.0646412	0.00443783	0.0460423	0.487063	0.00105833	0.000782021	0.14216	0.0214521	0.0203549	0.0336335	0.00526635	0.00151943	0.00508783	0.000769107	0.035759	0.00341722	0.00594541
FCA_GND8125922_CGAGAAGTCGGAAATA	3.90852e-05	3.15775e-05	3.5447e-05	0.00017633	2.28404e-05	0.000206751	7.42895e-05	4.75542e-05	0.000704678	0.99517	0.000592597	0.000705928	0.000947076	7.47022e-05	4.16315e-05	0.000245043	0.000109061	2.39287e-05	2.38705e-05	0.000392794	8.32273e-05	0.000251859
FCA_GND8125922_CGAGCACCAGGGAGAG	4.80576e-05	3.90964e-05	5.7316e-05	0.0154601	6.58874e-05	0.940281	0.000514635	0.00010142	0.0337902	0.00317476	9.40554e-05	0.000131679	0.000228455	6.37285e-05	0.00012213	0.00107582	0.00308696	6.89046e-05	3.36162e-05	0.000737533	0.000556327	0.000268412
FCA_GND8125922_CGAGCACTCCAAGTAC	0.00163063	0.00121567	0.00788119	0.0245373	0.00286649	0.0149672	0.00514298	0.0987446	0.0329077	0.000641807	0.00053485	0.0411615	0.017213	0.583988	0.119722	0.00549114	0.000873075	0.0147695	0.000676485	0.0207563	0.00198719	0.00229077
FCA_GND8125922_CGAGCACTCTTGCAAG	0.0024691	0.00238618	0.00980848	0.0917264	0.00765288	0.0290173	0.0212638	0.420904	0.201425	0.000533101	0.000373883	0.0991687	0.00833332	0.0105582	0.0142652	0.0119227	0.00143421	0.022549	0.000428586	0.0338737	0.00453745	0.00536827
FCA_GND8125922_CGATCGGTCAAACAAG	0.00961287	0.00235092	0.0188191	0.113701	0.00678084	0.0560016	0.0230739	0.0618922	0.338173	0.00133326	0.0010763	0.151343	0.0166727	0.0107023	0.0649428	0.0143391	0.0017222	0.0125641	0.00127761	0.0796513	0.00670224	0.00726792
FCA_GND8125922_CGATTGAAGCATCATC	0.00427335	0.00173089	0.0338955	0.0517314	0.00481488	0.0534085	0.00218371	0.0348143	0.226771	0.00114736	0.00155715	0.353207	0.0134004	0.0148722	0.140212	0.00569848	0.00171103	0.00733995	0.0014873	0.0346093	0.00466932	0.00646459
FCA_GND8125922_CGCCAAGTCGTTTGCC	0.00312605	0.00160028	0.00611557	0.0265809	0.00387945	0.0572298	0.000526312	0.284935	0.326721	0.000399937	0.000276982	0.225951	0.0194192	0.00997168	0.00605862	0.00556167	0.000665924	0.00674183	0.000373184	0.0119856	0.000852546	0.00102755
FCA_GND8125922_CGCGTTTAGAGAGCTC	0.0048902	0.00205182	0.00180488	0.150706	0.00552861	0.448399	0.0834849	0.00447681	0.164802	0.00286191	0.00142764	0.00415981	0.00853465	0.00191461	0.00243424	0.00783784	0.00556679	0.00281725	0.00168232	0.015493	0.0704695	0.00865619
FCA_GND8125922_CGCGTTTCAATCCGAT	0.016706	0.0145667	0.0143534	0.0462243	0.0706512	0.0776382	0.0545325	0.0558013	0.0972889	0.0134591	0.0114459	0.0662625	0.0323136	0.184753	0.0311762	0.0601149	0.0141254	0.0452575	0.0112023	0.054093	0.0139883	0.0140458
FCA_GND8125922_CGCTATCCAGCCTATA	0.0273603	0.00344673	0.0038448	0.111901	0.00835766	0.303645	0.0866851	0.00975727	0.107627	0.00553884	0.00254574	0.00564252	0.014697	0.0033885	0.00347809	0.0201331	0.0129597	0.00515694	0.00284966	0.0156655	0.231491	0.0138277
FCA_GND8125922_CGCTATCGTTCGCGAC	0.00400673	0.00260836	0.00605936	0.089121	0.0104186	0.0323024	0.00748011	0.280261	0.319716	0.000610611	0.000664811	0.121228	0.0219363	0.0100283	0.0192959	0.0139476	0.00153877	0.0240811	0.000594319	0.0245082	0.00406743	0.00552508
FCA_GND8125922_CGCTGGACAGTCCTTC	0.00261028	0.00268427	0.00452088	0.03157	0.00481436	0.0640034	0.00357675	0.056382	0.104052	0.00242903	0.00185696	0.0851987	0.0122167	0.51688	0.0526354	0.018756	0.00278595	0.012257	0.00169328	0.0119853	0.0032976	0.00379374
FCA_GND8125922_CGCTTCAAGCGTTCCG	0.0108372	0.0027404	0.0107931	0.101614	0.00874025	0.12308	0.0102992	0.102605	0.304451	0.0012172	0.00144133	0.136148	0.0207984	0.0192619	0.0354273	0.0074819	0.0100583	0.014374	0.00114068	0.052371	0.00962656	0.0154937
FCA_GND8125922_CGCTTCATCACGCATA	0.00229483	0.00289039	0.0166535	0.1123	0.00337732	0.264193	0.00380076	0.00405727	0.207073	0.00136798	0.00111039	0.0670692	0.0120786	0.00358036	0.252721	0.0027315	0.00275619	0.00289807	0.00179664	0.0215999	0.00592719	0.00772363
FCA_GND8125922_CGCTTCATCTTCTGGC	0.00277733	0.00229821	0.0247334	0.0475246	0.00226838	0.0328138	0.0186498	0.0894092	0.275636	0.000704335	0.000675094	0.359324	0.00756315	0.023666	0.054347	0.0125295	0.00163295	0.00690359	0.00101218	0.0250171	0.00387413	0.00664059
FCA_GND8125922_CGGACACAGTTGTAGA	0.00448489	0.00311898	0.074119	0.0209587	0.0039815	0.0240643	0.00427345	0.172872	0.0988127	0.00205739	0.00172545	0.320291	0.0185057	0.112628	0.0785418	0.00580453	0.00230085	0.013815	0.00227749	0.0265647	0.00325499	0.00554682
FCA_GND8125922_CGGACTGAGTAGGCCA	3.79727e-05	8.87083e-05	9.25954e-05	0.00201407	0.000184484	0.0109855	0.000834744	0.000123948	0.0233258	4.69145e-05	8.1662e-05	0.000139258	0.000213302	0.000302753	0.943077	0.000400016	0.000229911	0.000161443	7.34412e-05	0.0126973	0.000222581	0.00466655
FCA_GND8125922_CGGAGCTGTGGCTCCA	0.0239719	0.00376676	0.00325848	0.0539105	0.0165787	0.63696	0.00402254	0.00487058	0.0644886	0.00272656	0.0030374	0.00579161	0.0148169	0.00287549	0.00385957	0.00746499	0.0222238	0.0108776	0.00618556	0.040427	0.0527669	0.0151183
FCA_GND8125922_CGGAGTCGTTAAAGAC	0.00498629	0.00402602	0.00569526	0.0122793	0.683225	0.0301382	0.00960863	0.0192054	0.0174139	0.0126715	0.0131148	0.0364593	0.00828726	0.00551032	0.00518164	0.00910596	0.03584	0.0600039	0.00361136	0.0121396	0.00565925	0.00583702
FCA_GND8125922_CGGGTCACATTGGTAC	0.000563335	0.000612908	0.000880643	0.00139708	0.000703348	0.0128741	0.00111186	0.00169938	0.0253325	0.000624965	0.000632716	0.00457592	0.000866843	0.0061201	0.894381	0.00109898	0.0351944	0.00254773	0.000391846	0.00173003	0.00486542	0.00179471
FCA_GND8125922_CGGGTCAGTCAACTGT	0.00417692	0.00298889	0.00914152	0.0481205	0.00822711	0.0536924	0.00186108	0.161734	0.377446	0.000900855	0.000977304	0.205132	0.0372983	0.0126992	0.017045	0.00555079	0.0023884	0.0159207	0.00093304	0.0270964	0.00205642	0.00461211
FCA_GND8125922_CGGGTCATCAACTCTT	0.000613765	0.000537611	0.00147157	0.00464693	0.000990951	0.00737069	0.00202847	0.0034232	0.00778911	0.000454654	0.000320624	0.0118234	0.00920098	0.827013	0.0940079	0.00605375	0.000648201	0.00218674	0.000322256	0.0175055	0.000824553	0.000765931
FCA_GND8125922_CGGTTAATCACCGTAA	0.00860631	0.00429131	0.103704	0.0193296	0.00351167	0.06021	0.00407891	0.0817631	0.124709	0.00154256	0.00124233	0.384002	0.0156924	0.088601	0.039792	0.0106018	0.00244992	0.00994222	0.00206237	0.0261412	0.00402653	0.00370045
FCA_GND8125922_CGTAGCGAGGCCCTCA	0.00234447	0.00156765	0.00209298	0.238092	0.00343993	0.266202	0.00801174	0.00580083	0.306024	0.00196598	0.00101735	0.00563167	0.0102901	0.00194466	0.00583574	0.0362777	0.00421112	0.00259729	0.00115738	0.0636342	0.0101026	0.021759
FCA_GND8125922_CGTCAGGGTAATAGCA	0.00216327	0.00111883	0.0142831	0.0155777	0.00322226	0.0958389	0.00104701	0.592082	0.107815	0.000931692	0.000962304	0.0466941	0.00841481	0.00373401	0.059885	0.00687569	0.00154037	0.00592206	0.00112222	0.00441777	0.00285862	0.0234939
FCA_GND8125922_CGTCAGGGTCGACTAT	0.00172693	0.00135953	0.00906414	0.113974	0.00307584	0.0618834	0.00847101	0.00553979	0.459292	0.000693878	0.000831685	0.0682426	0.00910541	0.00448658	0.177732	0.00665098	0.00207873	0.00277699	0.000691359	0.05021	0.00688979	0.00522367
FCA_GND8125922_CGTCAGGTCGGAAATA	0.00876229	0.0064628	0.0146413	0.0620693	0.0214965	0.0767017	0.01209	0.130128	0.252561	0.00599536	0.00504846	0.0834552	0.0168564	0.0261235	0.0140284	0.00889722	0.0062115	0.0554801	0.00593539	0.133228	0.0206435	0.0331853
FCA_GND8125922_CGTCCATTCTGAGTGT	0.00440657	0.00328844	0.00622873	0.0903599	0.00431216	0.0902718	0.00144789	0.0480923	0.595427	0.00135572	0.00159811	0.0846424	0.0306254	0.00652277	0.0091896	0.00264858	0.0017131	0.0032153	0.00131697	0.00940349	0.00192436	0.00200983
FCA_GND8125922_CGTCTACTCTGGCGTG	0.00274083	0.00131135	0.00154451	0.0567362	0.00345145	0.0193313	0.000722972	0.0546727	0.758024	0.000565773	0.000558442	0.0363374	0.0118589	0.00178179	0.00108562	0.00880607	0.000529106	0.00309488	0.000790615	0.0337988	0.00138748	0.000870161
FCA_GND8125922_CGTGTAAAGACGCTTT	0.00144091	0.00120671	0.046818	0.0212335	0.00188988	0.0415476	0.00161435	0.0224526	0.0820437	0.000616564	0.000651065	0.0745432	0.00819506	0.0112962	0.634835	0.00452632	0.001206	0.00499104	0.000705644	0.0211933	0.00185296	0.0151404
FCA_GND8125922_CGTGTAAAGGGATGGG	0.00159276	0.00220477	0.00811154	0.0155771	0.00213296	0.0487874	0.00475151	0.00968817	0.050642	0.00107116	0.00108232	0.0566781	0.00463355	0.325954	0.376799	0.0170222	0.00221857	0.00702038	0.00109838	0.0517671	0.00348336	0.00768284
FCA_GND8125922_CGTGTCTCATCTATGG	0.0574864	0.00434295	0.00366633	0.302984	0.00935918	0.111297	0.0135669	0.00682514	0.0539906	0.00266547	0.00226426	0.010975	0.0177147	0.00356458	0.00338214	0.0133506	0.00355106	0.00487041	0.00278733	0.0468982	0.311633	0.0128244
FCA_GND8125922_CGTTAGAGTAGAGTGC	0.0166063	0.0621114	0.0125204	0.0492749	0.00751949	0.0663079	0.00660643	0.041947	0.391562	0.00375592	0.00334524	0.0144114	0.0209411	0.00610082	0.118568	0.0206547	0.00472042	0.00890505	0.00471682	0.0908783	0.00799838	0.0405486
FCA_GND8125922_CGTTCTGGTAATAGCA	0.00768462	0.00488129	0.00750834	0.151977	0.00674901	0.0847139	0.00391399	0.0595238	0.393236	0.00347876	0.00194149	0.124814	0.0145715	0.0133287	0.0215285	0.0104743	0.0030552	0.0157313	0.00210294	0.0505955	0.00972359	0.00846615
FCA_GND8125922_CGTTGGGAGGGTGTTG	0.00119721	0.000857471	0.00480382	0.0352421	0.00110286	0.250681	0.000778777	0.00210879	0.554088	0.000596165	0.000785588	0.0608347	0.00433653	0.00301469	0.0178227	0.00144065	0.000884693	0.000883732	0.000828697	0.0474338	0.00223628	0.00804142
FCA_GND8125922_CGTTGGGCAAGCGCTC	0.00118465	0.00105276	0.00592296	0.00390798	0.0533237	0.00191979	0.00403135	0.011557	0.0095494	0.000826239	0.000744199	0.0142777	0.00156662	0.00210266	0.00102362	0.00125567	0.00130397	0.876296	0.000743067	0.00393441	0.00124134	0.00223467
FCA_GND8125922_CGTTGGGGTACAGACG	0.00519783	0.0040283	0.0137063	0.0654682	0.00358736	0.0716998	0.00964807	0.0255543	0.340924	0.00150844	0.00143863	0.160703	0.0118126	0.00817467	0.105995	0.00886286	0.00298759	0.00877828	0.00167	0.118912	0.00689571	0.0224479
FCA_GND8125922_CTAACTTTCGGTTCGG	0.00343943	0.00178735	0.0128115	0.0440179	0.00437011	0.0913128	0.00186824	0.172139	0.377171	0.000671795	0.000414581	0.157309	0.00827353	0.00668007	0.0761215	0.00220097	0.000956562	0.00704612	0.000451217	0.0253673	0.00201899	0.0035703
FCA_GND8125922_CTAAGACCATCCGGGT	0.0104668	0.00685807	0.0106686	0.0770046	0.0287523	0.0966633	0.0149103	0.0463723	0.209632	0.00536394	0.00458661	0.114463	0.0224932	0.0143652	0.0176692	0.0190338	0.00652019	0.0183266	0.00493195	0.135307	0.0383848	0.0972264
FCA_GND8125922_CTAAGACGTTGTACAC	0.0134987	0.0107141	0.0152	0.0380931	0.0374744	0.0635211	0.0339636	0.0308094	0.0713599	0.00971576	0.00758662	0.16986	0.0255216	0.254707	0.0471173	0.0215763	0.00980767	0.031272	0.00804364	0.0800962	0.010277	0.00978408
FCA_GND8125922_CTAAGACTCGCGCCAA	0.000192992	0.000139375	0.000369864	0.00333197	0.000319817	0.031954	0.00112356	0.000261481	0.0192335	0.00066068	8.62664e-05	0.017317	0.00273132	0.899569	0.00237012	0.00328711	0.000234206	0.000259161	0.00011309	0.016178	0.000124931	0.00014263
FCA_GND8125922_CTACACCTCGTCCAGG	0.012515	0.00567545	0.0332728	0.0218034	0.0133246	0.0304102	0.00964792	0.172237	0.0449943	0.00325718	0.00251836	0.322102	0.00830858	0.0195038	0.0194646	0.00923235	0.00368562	0.038342	0.0027585	0.125003	0.0203466	0.0815963
FCA_GND8125922_CTACATTAGAGAGCTC	0.00439794	0.00184409	0.0351919	0.164252	0.00534357	0.163706	0.00143485	0.00382344	0.31916	0.000911563	0.000915738	0.175935	0.014567	0.00458555	0.0797851	0.00256276	0.00204725	0.00249268	0.000889397	0.00971168	0.0028189	0.00362431
FCA_GND8125922_CTACATTTCTGCCAGG	0.00438801	0.00130924	0.033367	0.0180569	0.00228766	0.0219589	0.00235047	0.505839	0.071486	0.000509766	0.000375945	0.147317	0.0103742	0.0478418	0.0708706	0.00307209	0.000793839	0.0265615	0.000583258	0.0240864	0.00212798	0.00444149
FCA_GND8125922_CTACATTTCTTGAGAC	0.00214134	0.00139674	0.0250596	0.0519611	0.00514611	0.104344	0.00109292	0.0538581	0.519288	0.000642889	0.000973172	0.128997	0.0141345	0.0133658	0.053359	0.005456	0.00161537	0.00564384	0.00100931	0.00570346	0.00144058	0.00337112
FCA_GND8125922_CTACGTCAGTATGACA	0.00389748	0.00322294	0.00508803	0.0695564	0.00674388	0.0407903	0.0033296	0.00743673	0.638326	0.00341289	0.00380101	0.072482	0.0194254	0.0166238	0.0094199	0.00515734	0.00170789	0.00352641	0.00292246	0.0733158	0.00517804	0.00463612
FCA_GND8125922_CTACGTCCACTTCTGC	0.00354014	0.00218752	0.00916372	0.0684727	0.0086582	0.0548076	0.0117282	0.331349	0.292174	0.00081601	0.000659497	0.0717539	0.0195773	0.014504	0.0263718	0.0138238	0.00157791	0.0224541	0.000739721	0.0353025	0.00323285	0.00710653
FCA_GND8125922_CTCACACGTCGAACAG	0.0031335	0.00219672	0.0035339	0.0123284	0.00226561	0.0219783	0.00799042	0.00225365	0.0262717	0.00261221	0.00127457	0.175328	0.00880484	0.59677	0.0103712	0.0735115	0.0024521	0.00191424	0.00120003	0.0397377	0.00178387	0.00228793
FCA_GND8125922_CTCAGAATCTCGTATT	0.0310068	0.00524398	0.00669917	0.0252629	0.00556137	0.0889177	0.00551543	0.00953168	0.0355164	0.00353615	0.00390558	0.00936866	0.0112958	0.00613575	0.0057653	0.00949102	0.00460887	0.00815945	0.0193045	0.140136	0.471255	0.0937834
FCA_GND8125922_CTCGAAAAGAAGGGTA	0.00437089	0.00289809	0.0496	0.0182703	0.00611972	0.0279647	0.0113266	0.121222	0.0554241	0.00122329	0.00095783	0.476465	0.00950727	0.0355806	0.0160054	0.00634256	0.00175408	0.0174821	0.00115892	0.11325	0.00770381	0.0153729
FCA_GND8125922_CTCGGAGTCTATCCTA	0.00053007	0.000536988	0.00127943	0.012387	0.000924788	0.0068637	0.00591723	0.00293684	0.00848053	0.000330084	0.000225785	0.00478318	0.0079675	0.795989	0.126302	0.00240326	0.000518377	0.00194456	0.000225036	0.0183419	0.00062829	0.000484455
FCA_GND8125922_CTCGGGAGTAGAGGAA	0.000789999	0.00255584	0.00753947	0.0171653	0.00173005	0.067614	0.00537478	0.00823051	0.0786685	0.000468514	0.000381653	0.00835687	0.0107636	0.00312467	0.751551	0.0207567	0.00142697	0.00240494	0.00053112	0.00560719	0.00114528	0.00381273
FCA_GND8125922_CTCGGGATCTGAGTGT	0.00857333	0.00733065	0.00993364	0.186389	0.00654483	0.0396021	0.00320433	0.0200503	0.426663	0.00156112	0.00174065	0.0769887	0.0384492	0.00973795	0.0727927	0.0150239	0.00220622	0.00396362	0.00155259	0.0512102	0.00534917	0.0111326
FCA_GND8125922_CTCTAATAGATAGTCA	0.00318101	0.00321231	0.0064053	0.0425578	0.00594589	0.190915	0.00457924	0.029006	0.228372	0.00398651	0.00152746	0.0263772	0.0131026	0.284734	0.0479021	0.00644425	0.00282583	0.00623539	0.00185476	0.083484	0.00287556	0.00447631
FCA_GND8125922_CTCTAATAGGTCGGAT	0.00316882	0.00140737	0.0179992	0.0842737	0.00534205	0.0836809	0.00591275	0.15753	0.27564	0.000875781	0.000840635	0.233134	0.011428	0.0176286	0.0289669	0.0141852	0.00177259	0.0122594	0.000885208	0.0321035	0.00430159	0.00666368
FCA_GND8125922_CTCTAATCAGCATACT	0.00976449	0.0048555	0.00681931	0.0745186	0.0126797	0.141721	0.0269768	0.130923	0.354663	0.014725	0.0039395	0.0413843	0.0181773	0.00831574	0.00779228	0.00994186	0.00493531	0.0126509	0.00390641	0.031961	0.0604133	0.0189357
FCA_GND8125922_CTCTAATTCACAGGCC	0.00152255	0.000472556	0.00125844	0.0510837	0.00125059	0.0258849	0.000464115	0.00696427	0.764939	0.000208386	0.000241219	0.00299632	0.0104962	0.00106869	0.0307474	0.00316642	0.000296028	0.000783593	0.000247863	0.0882907	0.000461732	0.00715531
FCA_GND8125922_CTGAAACGTCGACTAT	0.00242223	0.00192968	0.00614079	0.0445369	0.0100142	0.0261989	0.0109607	0.442247	0.231796	0.000782713	0.000646401	0.107552	0.0119651	0.0100167	0.0109429	0.0105092	0.00111906	0.0220952	0.000612163	0.0368092	0.00342326	0.00727963
FCA_GND8125922_CTGAAACGTGCACTTA	0.00220366	0.00282619	0.00567811	0.0579612	0.00577823	0.0392188	0.00564747	0.340487	0.280145	0.000916259	0.00091432	0.139123	0.00954612	0.00797438	0.0131917	0.00606644	0.00182949	0.0267883	0.000872784	0.0384171	0.00435153	0.0100631
FCA_GND8125922_CTGATCCAGAGGTAGA	0.0016319	0.00175096	0.00341465	0.0483619	0.00263982	0.0334365	0.02735	0.0112322	0.363681	0.00128635	0.00101623	0.00405088	0.00833212	0.00595598	0.351232	0.026947	0.00210555	0.00364269	0.00151944	0.0808476	0.00260451	0.0169608
FCA_GND8125922_CTGCCTATCTCGAGTA	0.000817509	0.00125403	0.00168265	0.0125677	0.0324186	0.014491	0.00730164	0.733208	0.089526	0.000599341	0.000410676	0.054642	0.00468423	0.00222327	0.00163606	0.00379908	0.00149629	0.0297083	0.000395563	0.00425751	0.00182868	0.00105199
FCA_GND8125922_CTGCGGAAGATCCGAG	1.22414e-05	3.49902e-05	3.97968e-05	0.000548735	4.97009e-05	0.00119841	0.000816628	4.98911e-05	0.00563638	7.31601e-06	4.81718e-05	6.32625e-05	0.000118269	0.00010077	0.990524	0.000117187	6.35561e-05	0.000145708	1.27021e-05	0.00024547	3.71165e-05	0.000129443
FCA_GND8125922_CTGCTGTGTCTGCGGT	0.00386096	0.0020684	0.00348116	0.101103	0.00785955	0.0640619	0.00655474	0.192429	0.38858	0.000992936	0.000701968	0.110578	0.022224	0.00654862	0.00952276	0.0129776	0.00207365	0.0141037	0.000596475	0.032437	0.00714297	0.0101019
FCA_GND8125922_CTGCTGTGTGTGAATA	0.00228516	0.00113867	0.00145887	0.0130143	0.00118007	0.199886	0.00285861	0.00170522	0.0442856	0.00100241	0.00129	0.00213786	0.00220552	0.00109423	0.00105017	0.00277803	0.00566826	0.00114338	0.000888276	0.0192368	0.655636	0.0380561
FCA_GND8125922_CTGTGCTCAATGGAGC	0.00583683	0.000770832	0.000580461	0.0225406	0.000902876	0.203634	0.000993007	0.000577358	0.0373396	0.00134148	0.000827537	0.000932675	0.00133025	0.000455878	0.000493727	0.00461989	0.00135687	0.000487574	0.0058815	0.0153741	0.682657	0.0110661
FCA_GND8125922_CTTACCGGTGTGAATA	0.0134217	0.0073096	0.010293	0.22047	0.0104208	0.155487	0.0341959	0.0102673	0.167372	0.0169567	0.0107244	0.0121282	0.0150759	0.00867597	0.0104402	0.0402206	0.0160021	0.0084375	0.0326313	0.0606116	0.109641	0.0292173
FCA_GND8125922_CTTACCGTCATCGCTC	0.00100073	0.000623726	0.000672294	0.00767334	0.000869178	0.0078949	0.000480983	0.854851	0.0898723	0.000357109	0.000132991	0.00670975	0.00293962	0.00268329	0.00124183	0.00102119	0.000379816	0.00574474	0.000224921	0.0107605	0.000443878	0.00342203
FCA_GND8125922_CTTCTCTTCACCGTAA	0.00510591	0.00210982	0.00824108	0.0676085	0.0061965	0.0680533	0.00595302	0.0526369	0.322752	0.00102996	0.000835762	0.243076	0.0432219	0.00652923	0.016427	0.0108775	0.0023719	0.014807	0.00096453	0.106345	0.00738267	0.00747468
FCA_GND8125922_CTTTGCGCAGCCACCA	0.00165241	0.00195473	0.0072303	0.0967242	0.00462573	0.0680561	0.00289048	0.0462702	0.266472	0.00112031	0.00124532	0.0404428	0.0109312	0.0035708	0.418955	0.00426561	0.00209371	0.00337375	0.0013582	0.0113316	0.00209826	0.00333638
FCA_GND8125922_CTTTGCGCATCGATGT	0.000460032	4.30643e-05	0.000148407	0.000550716	6.95207e-05	0.00439827	5.19148e-05	0.00059513	0.00290126	4.27834e-05	3.73819e-05	8.75468e-05	8.97252e-05	4.54362e-05	0.00248122	9.59572e-05	3.88195e-05	3.68484e-05	0.000218237	0.976397	8.51694e-05	0.0111257
FCA_GND8125922_GAAACTCAGAAGCCCA	0.0056202	0.00469315	0.0176071	0.0685216	0.0139476	0.0490236	0.00690692	0.19707	0.276555	0.00240572	0.00237067	0.173863	0.0223176	0.0264819	0.0163269	0.0106596	0.00348287	0.0146695	0.00238423	0.063571	0.00484855	0.0166737
FCA_GND8125922_GAAACTCTCCTTCAAT	0.120342	0.007366	0.0111031	0.0132476	0.0102846	0.055681	0.00557385	0.0223476	0.00955453	0.0066656	0.00514084	0.0147525	0.0201436	0.0107436	0.0116671	0.00795663	0.0066038	0.0105873	0.532365	0.0644375	0.0285781	0.0248577
FCA_GND8125922_GAACATCGTACCATCA	0.00509097	0.00529241	0.0366182	0.0492082	0.00229482	0.0915073	0.00226207	0.00357654	0.228579	0.00075979	0.000881181	0.121742	0.0149718	0.00559815	0.393896	0.00531656	0.00121338	0.0022044	0.00094448	0.0227663	0.00216664	0.00310899
FCA_GND8125922_GAACCTACAGTATCTG	0.0273536	0.0062232	0.102215	0.103411	0.0125124	0.108818	0.0270711	0.0471238	0.110122	0.00465989	0.00434908	0.151021	0.0549376	0.0720534	0.0649404	0.0102045	0.0059015	0.012966	0.00572927	0.0381639	0.0190946	0.0111287
FCA_GND8125922_GAAGCAGCACAGGTTT	0.00551112	0.00412928	0.00400155	0.0995868	0.00940658	0.0676212	0.00415898	0.065004	0.51804	0.00245937	0.00300861	0.0284997	0.0142416	0.00682583	0.00851191	0.0091709	0.00423383	0.00793053	0.00231141	0.0590707	0.0100612	0.0662149
FCA_GND8125922_GAATGAAGTAGTAGTA	0.000212564	0.000114907	0.00150201	0.000612459	0.00577422	0.000459044	0.000624429	0.00281646	0.000891038	0.00019846	0.000146262	0.0083008	0.000455624	0.0227215	0.000283754	0.000168626	0.00015292	0.953634	0.000126533	0.000460741	0.000145046	0.000198703
FCA_GND8125922_GACACGCAGAGGTTAT	0.00971522	0.00482016	0.0138773	0.0292091	0.00570454	0.112037	0.00642484	0.0112822	0.342855	0.00276901	0.00347137	0.175713	0.0164369	0.0406283	0.0537266	0.0160043	0.00341845	0.00622883	0.00376565	0.111621	0.00741958	0.0228721
FCA_GND8125922_GACAGAGGTACTCGCG	0.00472831	0.00241178	0.0442491	0.0812557	0.00493069	0.0802041	0.00342798	0.11293	0.260374	0.00170971	0.0013765	0.21406	0.0117189	0.0461289	0.0334215	0.00548105	0.0021112	0.00978724	0.00222246	0.0567433	0.00879963	0.0119281
FCA_GND8125922_GACCAATTCACCGGGT	0.00225861	0.00145139	0.0452993	0.0257958	0.00219836	0.0505549	0.00215349	0.128094	0.128149	0.000533656	0.000437221	0.486758	0.00408893	0.027047	0.0414408	0.00548614	0.00120476	0.010624	0.000470739	0.0256734	0.00312175	0.00715855
FCA_GND8125922_GACGGCTCATGGATGG	0.00316651	0.00112848	0.0104832	0.0746457	0.00650768	0.136446	0.00254031	0.0648703	0.295583	0.000927106	0.00141007	0.268086	0.0109004	0.0105983	0.0284157	0.0152733	0.00169258	0.00898579	0.00108211	0.033656	0.00640102	0.0172014
FCA_GND8125922_GACGTGCTCTGCAGTA	0.00614603	0.00326938	0.00725783	0.0541187	0.0120363	0.03039	0.0128977	0.309449	0.287791	0.0015337	0.00106185	0.0922534	0.0477474	0.0197002	0.0324762	0.0152506	0.00189779	0.0237073	0.00126244	0.0250935	0.00636557	0.00829438
FCA_GND8125922_GACTAACGTCTTCTCG	0.0175603	0.00918149	0.0182382	0.0555465	0.103903	0.217725	0.0135456	0.0234708	0.0832541	0.0118553	0.00781685	0.0647212	0.0152408	0.0113891	0.0191222	0.0120883	0.0855166	0.0736067	0.0113883	0.0473865	0.052629	0.0448141
FCA_GND8125922_GATCGCGGTACGCACC	0.0225875	0.003926	0.00387392	0.180243	0.00818409	0.149793	0.00710059	0.00584078	0.091435	0.00305226	0.00307806	0.00718068	0.0156316	0.00372707	0.00691743	0.0316582	0.00414136	0.00518714	0.00693011	0.0317769	0.320477	0.0872574
FCA_GND8125922_GATCGCGGTCGGCACT	0.00277334	0.00175059	0.0033656	0.0930718	0.00679076	0.0510592	0.00788347	0.274743	0.361906	0.000764782	0.000503758	0.0934654	0.0169839	0.00619245	0.00920147	0.0118457	0.00159417	0.0135281	0.000416959	0.0291943	0.00543775	0.00752769
FCA_GND8125922_GATCGCGTCTTCAACT	0.00109042	0.000832134	0.00288332	0.119356	0.00398647	0.542158	0.00192563	0.00417358	0.193601	0.000753394	0.000720336	0.036726	0.00269083	0.0017162	0.0043883	0.00440446	0.00271357	0.00238295	0.000818713	0.0349164	0.0272167	0.0105456
FCA_GND8125922_GATCGTATCAGGCCCA	0.00276618	0.000420564	0.00113972	0.00698566	0.000816251	0.0100849	0.000720476	0.811481	0.0947258	0.000286276	0.000534408	0.0248732	0.004667	0.00403146	0.00212405	0.00075609	0.000640658	0.0197779	0.000275067	0.011076	0.000698561	0.00111894
FCA_GND8125922_GATGAAAAGCTACCTA	0.00183282	0.00251915	0.00323681	0.0706975	0.00456	0.0312583	0.00803006	0.403292	0.260978	0.000963636	0.000631957	0.11873	0.00548373	0.00707372	0.0154804	0.0209515	0.00164675	0.0112285	0.000411159	0.0202301	0.00371598	0.00704753
FCA_GND8125922_GATGAAATCCCAACGG	0.00137046	0.00128987	0.00382137	0.0400026	0.00714855	0.0109933	0.0046943	0.664804	0.126605	0.000419947	0.000693143	0.035614	0.0175086	0.00924419	0.0173218	0.0170024	0.00073043	0.0264654	0.000575817	0.00797451	0.00200348	0.00371692
FCA_GND8125922_GATTCAGAGTTAACGA	7.35399e-06	1.15582e-05	6.51926e-06	0.000268219	8.76939e-06	0.000977891	1.72796e-05	2.24259e-05	0.00183416	0.99594	0.000244329	4.27554e-05	9.50539e-05	1.678e-05	3.56074e-05	0.000110698	0.000147231	1.15683e-05	7.81612e-06	0.000142797	1.55235e-05	3.59348e-05
FCA_GND8125922_GATTCAGCACAACGCC	0.00352527	0.00203574	0.00294915	0.198713	0.0031198	0.0744034	0.00225823	0.00176001	0.375362	0.00202017	0.00186129	0.0180647	0.011143	0.00234562	0.014537	0.00412677	0.00224156	0.00145796	0.00416466	0.222442	0.0253317	0.0261374
FCA_GND8125922_GCAATCACATATGGTC	0.0256357	0.00503739	0.0454438	0.0794479	0.0141312	0.0466775	0.0146518	0.0761074	0.192445	0.00235569	0.00225105	0.20894	0.0274205	0.0426654	0.0797617	0.0137915	0.00292614	0.0156804	0.00399448	0.0584426	0.0205312	0.0216617
FCA_GND8125922_GCACATAAGAGCTGCA	0.0089025	0.00248644	0.067953	0.0218811	0.00372044	0.0236976	0.00623468	0.263735	0.0562876	0.000673676	0.000505407	0.350775	0.00862213	0.0444174	0.0482087	0.00503893	0.0011286	0.0222512	0.000712936	0.0488673	0.00490312	0.00899735
FCA_GND8125922_GCACTCTCACCATGTA	0.00994407	0.00311006	0.00512423	0.0181044	0.00425209	0.0501443	0.00502331	0.00449097	0.0358105	0.00398576	0.00177521	0.0980812	0.022427	0.62849	0.0145452	0.0524126	0.00306825	0.00305178	0.00185223	0.0290446	0.0026088	0.00265314
FCA_GND8125922_GCAGCCAAGAACTGTA	0.00553299	0.00445842	0.0139473	0.146566	0.0200187	0.0368291	0.00641053	0.0548407	0.297247	0.00288899	0.0050814	0.262449	0.0146261	0.0201783	0.0100693	0.00863044	0.0038071	0.00983375	0.00285416	0.0600299	0.00489804	0.00880328
FCA_GND8125922_GCAGCCACACACGCTG	0.00342615	0.00377496	0.00769304	0.090898	0.0103953	0.05062	0.0112771	0.0244923	0.308312	0.00162189	0.00314319	0.317322	0.0141957	0.00848075	0.0150918	0.0110115	0.0028171	0.00732086	0.00184376	0.0827279	0.00532764	0.0182074
FCA_GND8125922_GCAGTTACAACCGCCA	0.000928136	0.000505815	0.00310235	0.0461341	0.00116532	0.224401	0.000573087	0.00671492	0.642336	0.000517723	0.0002886	0.0194732	0.0044312	0.0010554	0.00321973	0.00157261	0.000610744	0.000928807	0.000297289	0.0401239	0.000495861	0.00112406
FCA_GND8125922_GCAGTTATCTCGAGTA	0.00318387	0.00278947	0.036034	0.040641	0.0100198	0.0990573	0.00221456	0.103884	0.244344	0.00103884	0.000880392	0.349612	0.00714227	0.0128182	0.0386153	0.00293085	0.00137618	0.0090515	0.00108452	0.0279566	0.00170416	0.00362143
FCA_GND8125922_GCATACACACGGACAA	0.0136394	0.00142397	0.0412594	0.0535653	0.00537581	0.187527	0.00165405	0.0728941	0.193783	0.000790455	0.00116372	0.303078	0.006834	0.0363772	0.0280298	0.00218516	0.00752424	0.0100515	0.000751738	0.0226697	0.00298331	0.00643929
FCA_GND8125922_GCATGCGAGGCGATAC	0.0104343	0.00687035	0.0648704	0.0332546	0.0112427	0.0605818	0.00577659	0.190161	0.107514	0.00273518	0.00252134	0.129684	0.0233793	0.0196633	0.226266	0.00892181	0.00354364	0.0205825	0.00300878	0.0503742	0.0053622	0.0132528
FCA_GND8125922_GCATGTATCCATGAGT	0.00304595	0.00252811	0.0115816	0.0385016	0.00632426	0.0418499	0.00410933	0.232519	0.364972	0.00117916	0.00284452	0.132645	0.0435951	0.0155052	0.0587598	0.00925589	0.00121136	0.006463	0.00108002	0.0171677	0.00174125	0.00311963
FCA_GND8125922_GCCAAATCATCGGTTA	0.00460613	0.00413618	0.00429357	0.0588238	0.0109549	0.310348	0.0160881	0.00708701	0.405311	0.00389131	0.00387951	0.00702768	0.00911804	0.00381963	0.00693538	0.0128695	0.00998954	0.00506928	0.0069578	0.0258617	0.0569024	0.0260289
FCA_GND8125922_GCCAAATTCCTAGTGA	0.00499423	0.00184322	0.0237499	0.112725	0.00805177	0.0843844	0.0102174	0.0371244	0.230779	0.00113908	0.00115461	0.254651	0.0138119	0.011846	0.0327952	0.0125537	0.00179214	0.00963521	0.00117812	0.113798	0.00897679	0.0227987
FCA_GND8125922_GCCTCTAAGACAGAGA	0.000870517	0.00117583	0.00360806	0.151384	0.00508087	0.0461728	0.00711409	0.0184999	0.680999	0.000750567	0.0011937	0.00790835	0.0101313	0.00209569	0.0157368	0.0102186	0.000789984	0.00229706	0.000777179	0.024423	0.00154993	0.00722321
FCA_GND8125922_GCCTCTAAGTGTACTC	0.00332477	0.00310987	0.00662901	0.0873661	0.00825632	0.117324	0.00332257	0.0701474	0.441935	0.00144519	0.000793415	0.173091	0.0213686	0.00418313	0.0220016	0.00477256	0.00154265	0.0072713	0.00078793	0.0142656	0.00381252	0.00324926
FCA_GND8125922_GCCTCTACATGAAGTA	0.00314161	0.00231752	0.0825949	0.0262734	0.00373462	0.0591282	0.00190124	0.0099876	0.282034	0.00132355	0.00136036	0.386479	0.0214916	0.00666358	0.069633	0.00271312	0.00206869	0.00538923	0.00145321	0.0202389	0.00568836	0.00438446
FCA_GND8125922_GCGAGAAAGTGCCATT	0.000218538	0.000230626	0.000503492	0.00300994	0.000793573	0.0166249	0.959847	0.00397365	0.00371	0.00033177	0.000116945	0.000294576	0.00380869	0.00043863	0.0005832	0.00101825	0.000329734	0.000326729	0.000800033	0.00156826	0.000847669	0.00062333
FCA_GND8125922_GCGCAGTCATGACATC	0.0117527	0.00660282	0.0304211	0.123698	0.0103402	0.0860731	0.0132763	0.0966821	0.15064	0.0035779	0.00296736	0.146947	0.0377862	0.0199063	0.127599	0.0133892	0.0039213	0.0119554	0.00341608	0.0791256	0.00811564	0.0118058
FCA_GND8125922_GCGCCAAAGGCTACGA	0.00323486	0.00232378	0.00227426	0.106552	0.00231852	0.259425	0.00589695	0.00281989	0.358351	0.00354571	0.00200332	0.00256337	0.00386052	0.00208248	0.00511626	0.0111488	0.00256339	0.00206697	0.165249	0.0392664	0.00691492	0.0104229
FCA_GND8125922_GCGCCAAGTAACGTTC	0.0019146	0.00103054	0.00101879	0.00879665	0.00142451	0.0340687	0.00103839	0.00205369	0.0171383	0.00109701	0.00115162	0.0169968	0.00122487	0.0011152	0.00412664	0.00173356	0.00424265	0.00137767	0.00545897	0.0120279	0.584936	0.296027
FCA_GND8125922_GCTCTGTAGCTCTCGG	0.000987038	0.000783232	0.00123001	0.0807137	0.0026381	0.0392	0.000863423	0.047074	0.780073	0.000251708	0.000204992	0.0166247	0.00487116	0.00105444	0.000968427	0.00918222	0.000708223	0.00222549	0.000162042	0.00835569	0.000973626	0.000854726
FCA_GND8125922_GCTGCAGCAGGCAGTA	0.00320546	0.000902616	0.0312717	0.0235928	0.0010966	0.0842391	0.00140583	0.003275	0.117166	0.000602987	0.000727185	0.624771	0.00758481	0.0166965	0.0404501	0.00128241	0.00105771	0.00306166	0.000755426	0.0326046	0.00221391	0.00203661
FCA_GND8125922_GCTGCTTCAGGGAGAG	0.0038286	0.00191057	0.0465169	0.0340828	0.00288695	0.127195	0.00217771	0.00637773	0.377845	0.0012909	0.000997455	0.0839069	0.017035	0.00947505	0.15771	0.00272368	0.00143832	0.00338453	0.00132103	0.107027	0.0027267	0.00814205
FCA_GND8125922_GCTGCTTGTCTAGTGT	0.00745727	0.0088739	0.0204388	0.0122472	0.00664767	0.105952	0.0180767	0.266696	0.0442721	0.00449505	0.0042445	0.0849602	0.185263	0.0369207	0.0202639	0.0562474	0.00527155	0.0340493	0.003469	0.0399679	0.0105676	0.0236185
FCA_GND8125922_GCTGGGTAGGGTCTCC	0.00508386	0.00694533	0.0112552	0.0539425	0.00327508	0.078107	0.00224153	0.0131748	0.717868	0.00064797	0.000551196	0.0342827	0.00984242	0.00261138	0.0226675	0.00690937	0.000979496	0.00228062	0.000601507	0.0231738	0.00177649	0.00178244
FCA_GND8125922_GGAAAGCCAGCTATTG	0.00708389	0.00705905	0.0261013	0.0232625	0.0287009	0.100783	0.00511489	0.111411	0.158665	0.00428003	0.00337723	0.220219	0.0175593	0.0201185	0.0887931	0.0123837	0.00405028	0.0280695	0.00339272	0.0820028	0.00915663	0.0384159
FCA_GND8125922_GGACAAGAGGATGTAT	0.00273786	0.00295447	0.00609098	0.0443541	0.00618419	0.0377857	0.013757	0.262659	0.166728	0.0026541	0.00260293	0.271582	0.008398	0.0159395	0.0109822	0.051235	0.00293168	0.0159859	0.00138966	0.0538922	0.00635397	0.0128018
FCA_GND8125922_GGACAAGTCTGCCAGG	0.00636381	0.00718345	0.147854	0.0796887	0.00777102	0.0875467	0.00651242	0.0388572	0.225741	0.00427539	0.00367486	0.074733	0.0812739	0.0137933	0.133203	0.021299	0.00491878	0.0103163	0.00439007	0.0221084	0.00711427	0.0113816
FCA_GND8125922_GGACAGAAGGAGTACC	0.0105994	0.00590679	0.0191111	0.0195919	0.00669702	0.108802	0.0124905	0.0625398	0.109555	0.00358604	0.00353691	0.21906	0.0170015	0.231322	0.0300809	0.0274843	0.00491093	0.0195905	0.00429672	0.0544034	0.00843839	0.020994
FCA_GND8125922_GGACAGACATGATCCA	0.00795223	0.00282156	0.0367056	0.026028	0.0551938	0.0492225	0.0140294	0.111761	0.254739	0.00253301	0.00182544	0.299691	0.0113896	0.0103322	0.00802197	0.0117765	0.00312451	0.0221267	0.00203337	0.0458891	0.011605	0.0111986
FCA_GND8125922_GGACATTAGCCTATGT	0.00552938	0.00355665	0.00544529	0.0523215	0.00644082	0.164973	0.006911	0.0281339	0.46259	0.0010347	0.000936834	0.0726724	0.0086828	0.00466769	0.0200949	0.00718012	0.00243611	0.00566049	0.00105571	0.0994988	0.0157434	0.0244342
FCA_GND8125922_GGACATTAGTCAATAG	0.00588428	0.00767009	0.0604295	0.08879	0.0211763	0.0489433	0.00451224	0.029237	0.450863	0.00292338	0.00256229	0.108737	0.0128478	0.0103767	0.0295695	0.00551692	0.00300983	0.0696871	0.00376726	0.0210014	0.00465095	0.00784382
FCA_GND8125922_GGACATTTCGGTCTAA	0.00330266	0.00255553	0.0086333	0.0586427	0.00699594	0.0173739	0.00935499	0.452712	0.214704	0.000622753	0.000595909	0.0972173	0.0176948	0.0146088	0.0291743	0.012468	0.00105566	0.0193003	0.000648343	0.0257441	0.00239542	0.00419929
FCA_GND8125922_GGACGTCCACAACGCC	0.00282163	0.000823983	0.00249783	0.0139837	0.00254872	0.281362	0.00416282	0.019717	0.137539	0.00181197	0.000554657	0.0230273	0.00255761	0.0254152	0.441329	0.0101307	0.00333091	0.00836539	0.0015081	0.00326549	0.00766355	0.00558426
FCA_GND8125922_GGACGTCTCTGACCTC	0.00340281	0.00211695	0.0133497	0.02379	0.00317635	0.0858164	0.00206316	0.042207	0.307478	0.0015519	0.0011351	0.289775	0.0135234	0.106142	0.0506901	0.00264718	0.00150957	0.00517392	0.0013684	0.03712	0.00268201	0.00328135
FCA_GND8125922_GGAGCAAGTCGCGGTT	0.00856152	0.00453374	0.00762992	0.0461108	0.0570887	0.0579378	0.00954268	0.25605	0.139117	0.00221889	0.00271739	0.163479	0.0174539	0.00835016	0.0180733	0.0123109	0.00445805	0.104001	0.00224105	0.0615071	0.00878845	0.00782882
FCA_GND8125922_GGATGTTCAGCTGCAC	0.00107713	0.000300442	0.000381786	0.00256133	0.000247095	0.0162163	0.000458276	0.00121947	0.0360295	0.000236288	0.000185443	0.00034277	0.000404967	0.000299099	0.00626922	0.000687557	0.000185645	0.000245419	0.000992758	0.831213	0.000714707	0.0997315
FCA_GND8125922_GGCAATTCATAGACTC	0.00626324	0.0011162	0.00432953	0.132866	0.00591653	0.0687947	0.00274281	0.0101002	0.474528	0.000893825	0.00114308	0.139951	0.0235565	0.00352429	0.0120946	0.0114164	0.00134398	0.00269283	0.000975244	0.0841063	0.00270615	0.00893826
FCA_GND8125922_GGCCGATAGCGTAGTG	0.00172846	0.00497421	0.236977	0.0532434	0.00242272	0.0441922	0.00164945	0.0214206	0.0665556	0.000620635	0.000536515	0.0719841	0.0100909	0.0978627	0.358764	0.00647835	0.000874678	0.00336694	0.000686705	0.0111028	0.00119815	0.00326969
FCA_GND8125922_GGCGACTAGTGGTAAT	0.0033681	0.00418379	0.0388026	0.0333904	0.00724813	0.0505317	0.00675168	0.00844086	0.0919776	0.00170217	0.0017087	0.0850616	0.00786239	0.0132331	0.581679	0.00523986	0.00235609	0.00592916	0.001965	0.040071	0.002892	0.00560476
FCA_GND8125922_GGCGACTCACCTTGTC	0.00715487	0.0105144	0.0205744	0.0587082	0.0040446	0.123549	0.00449178	0.0365462	0.416376	0.00111796	0.00111653	0.0881788	0.0106401	0.00818546	0.0683449	0.00974541	0.00208077	0.00518818	0.00226485	0.0759239	0.0130761	0.0321777
FCA_GND8125922_GGCGACTTCTTGCATT	0.00300678	0.00400503	0.00330205	0.0707944	0.0598265	0.0282928	0.011533	0.211516	0.420298	0.00173297	0.00175746	0.0866754	0.00786979	0.0079659	0.00995842	0.00924493	0.00202961	0.0175169	0.00183476	0.0339997	0.00229852	0.00454077
FCA_GND8125922_GGCGTGTGTAAGTAGT	0.0307711	0.00391732	0.00656821	0.0184145	0.00568549	0.342708	0.00716508	0.00632424	0.168523	0.00349308	0.00427353	0.0106955	0.0061876	0.00535856	0.0057929	0.0101442	0.00565377	0.00410847	0.0081553	0.0278768	0.163568	0.154615
FCA_GND8125922_GGCTGGTTCTGCTGTC	0.0163584	0.00349742	0.0730396	0.012749	0.00448167	0.0155926	0.0041954	0.0458071	0.0609981	0.00158357	0.00141842	0.560113	0.015533	0.0300487	0.0962863	0.00590211	0.00187051	0.013005	0.00184933	0.0264713	0.00305068	0.00614848
FCA_GND8125922_GGGACCTTCGCCAGCA	0.00335738	0.00199514	0.00347211	0.107886	0.00659547	0.0307174	0.00586631	0.28165	0.382864	0.00055772	0.000661698	0.0470232	0.0245135	0.00577668	0.015828	0.0166957	0.0012284	0.0111656	0.000481053	0.0402329	0.00326333	0.00816828
FCA_GND8125922_GGGAGATTCCAAGCCG	0.0131115	0.00594351	0.0296094	0.0758106	0.00781275	0.0511644	0.00938539	0.0473991	0.236533	0.00280106	0.0025017	0.137344	0.0258059	0.00960554	0.271168	0.0148637	0.00304761	0.0121813	0.00293048	0.0312222	0.00380665	0.00595151
FCA_GND8125922_GGGATGAGTAAGTGGC	6.11333e-05	6.806e-05	0.000194005	0.000258185	9.34515e-05	0.00241985	0.000150841	0.00113808	0.00287732	5.07423e-05	0.000435138	0.000560995	0.000253331	0.000694245	0.979391	0.000239939	0.000279511	0.000425303	0.0004304	0.00105175	0.00140279	0.00752433
FCA_GND8125922_GGGCATCGTCCAGTAT	0.000778132	0.000853707	0.00147344	0.0737389	0.005835	0.0366658	0.00655536	0.239393	0.535483	0.000479848	0.000429778	0.0199507	0.00648336	0.00189208	0.0100635	0.0195144	0.00063318	0.00669274	0.000466396	0.0240331	0.00112164	0.00746333
FCA_GND8125922_GGGTTGCCAAGCCGCT	0.00516361	0.00275101	0.0212459	0.0388984	0.00468946	0.143996	0.00317512	0.185461	0.236585	0.00216961	0.00206257	0.0797946	0.0158338	0.0231833	0.129306	0.0130602	0.00273029	0.00686525	0.00307744	0.0430898	0.00594571	0.0309166
FCA_GND8125922_GGGTTGCTCCCAGGTG	0.00109894	0.000828001	0.010688	0.0169018	0.00562819	0.0294123	0.000585552	0.426026	0.074884	0.000312743	0.000178654	0.405004	0.00227392	0.00826172	0.00249591	0.00127259	0.000627435	0.00730944	0.000159927	0.00394104	0.00114118	0.000968977
FCA_GND8125922_GGTATTGCAGGCAGTA	0.0313701	0.0100301	0.0137805	0.0416533	0.0539295	0.207335	0.015416	0.0313322	0.144011	0.0127661	0.00836153	0.0545384	0.0291606	0.0118146	0.0178116	0.0173789	0.0516489	0.0734698	0.0270502	0.0460293	0.0474168	0.0536953
FCA_GND8125922_GGTGAAGGTCACTTCC	0.00154302	0.0013097	0.00251793	0.018905	0.00186303	0.0270382	0.00341357	0.0113351	0.0356571	0.000617778	0.000373587	0.0116466	0.0108472	0.786057	0.0623452	0.0071794	0.000704796	0.0035401	0.00047555	0.0107185	0.00110031	0.000811771
FCA_GND8125922_GGTGCGTAGTGCAAGC	0.0047374	0.00320004	0.090349	0.0720412	0.00348732	0.0628038	0.00442545	0.00747647	0.0713678	0.00149648	0.00134584	0.506516	0.0126843	0.0123145	0.119219	0.00298914	0.00183842	0.00410399	0.00155587	0.0106677	0.00248192	0.00289835
FCA_GND8125922_GGTGTTAAGCCACTAT	0.00737055	0.00296479	0.0448823	0.0677063	0.00586463	0.0846059	0.00464289	0.0153344	0.288518	0.00249729	0.00199068	0.219139	0.0410328	0.0270649	0.0694249	0.0102984	0.0025455	0.00694915	0.00216476	0.0716849	0.00534848	0.0179685
FCA_GND8125922_GGTGTTAAGCGTGAGT	0.00332476	0.00212297	0.00323604	0.0176331	0.104351	0.62416	0.00313177	0.0104891	0.0925503	0.00241249	0.00180809	0.00847001	0.00314099	0.00254398	0.00415038	0.00491268	0.0159702	0.0330401	0.00235303	0.0293917	0.00922655	0.0215812
FCA_GND8125922_GGTGTTACAAAGGAAG	0.00349975	0.00282648	0.00901767	0.0319523	0.00852681	0.0235009	0.00696934	0.507992	0.1808	0.000939596	0.000915566	0.095634	0.0184299	0.0122274	0.0386099	0.00891896	0.00169072	0.0210507	0.00109712	0.0165934	0.00268517	0.00612225
FCA_GND8125922_GTACTCCTCACTCCTG	0.00583936	0.00336538	0.0140634	0.145774	0.0084596	0.0428453	0.0069362	0.0999153	0.239945	0.00139849	0.00115023	0.185824	0.0177978	0.0121071	0.058557	0.00900242	0.00581041	0.030682	0.00144651	0.0747101	0.018596	0.0157746
FCA_GND8125922_GTACTTTGTACAGCAG	0.00318422	0.003808	0.00760492	0.0192615	0.0171407	0.0455606	0.00851785	0.0190502	0.15805	0.00313592	0.00207656	0.0085879	0.00635658	0.00799412	0.558296	0.00682424	0.00330441	0.00925926	0.00261182	0.0913619	0.00350435	0.0145088
FCA_GND8125922_GTAGGCCCACGTCTCT	0.00740583	0.00448868	0.109942	0.0429438	0.00427487	0.0492189	0.00641074	0.0358159	0.328872	0.0017315	0.00161206	0.240883	0.0279156	0.0181871	0.0215965	0.00951641	0.00224969	0.0123918	0.00189581	0.0653553	0.00310256	0.00418936
FCA_GND8125922_GTAGGCCGTCAGAATA	0.00109484	0.000981793	0.000850704	0.0810466	0.00464041	0.0339752	0.00139329	0.28638	0.473494	0.000350562	0.00116436	0.0694532	0.0100398	0.00197419	0.00538982	0.00787796	0.000952659	0.00689741	0.000272548	0.00759545	0.00201761	0.00215727
FCA_GND8125922_GTAGTCAAGCCGTCGT	0.00694771	0.00851308	0.0333192	0.0580103	0.00904963	0.207153	0.00653005	0.184785	0.12464	0.00453047	0.00746666	0.105929	0.0273333	0.0207806	0.0690051	0.0605678	0.00643361	0.0170595	0.00603949	0.0172127	0.00690933	0.0117848
FCA_GND8125922_GTATCTTTCTACCAGA	0.00177006	0.00166432	0.00199573	0.07035	0.00401934	0.622115	0.0587664	0.00753738	0.0853249	0.0297078	0.00160519	0.00341555	0.0407159	0.00183386	0.00363783	0.0351571	0.00794326	0.00397422	0.00121486	0.00773729	0.00427203	0.00524193
FCA_GND8125922_GTATTCTGTCCATGAT	0.00175998	0.00118445	0.00154883	0.0218379	0.0115038	0.0643549	0.00403761	0.198825	0.642616	0.00064074	0.000380305	0.0112773	0.00437918	0.00183927	0.00567505	0.00399582	0.00108326	0.00618429	0.0003866	0.011227	0.00272664	0.0025357
FCA_GND8125922_GTATTCTTCGCCTGAG	0.00317302	0.00235986	0.00372881	0.0487605	0.00432875	0.0750802	0.00436431	0.35671	0.238314	0.00146	0.00243768	0.178258	0.0105929	0.005342	0.0108686	0.0100976	0.00423217	0.0126205	0.000955289	0.0110875	0.00421696	0.0110114
FCA_GND8125922_GTCAAGTCAGCAGTTT	0.00550505	0.00214015	0.0278545	0.00899175	0.00288195	0.0235077	0.00405437	0.115473	0.420336	0.000935334	0.00137147	0.271283	0.0176197	0.0139865	0.0338321	0.00439702	0.00115957	0.0213511	0.0032211	0.012834	0.00434531	0.00291931
FCA_GND8125922_GTCACAATCCCGACTT	0.00159603	0.000795487	0.0029126	0.00964494	0.00694493	0.0108328	0.00193243	0.747223	0.0953205	0.000534023	0.000496639	0.0781031	0.0159117	0.00235705	0.00270468	0.00235628	0.000645147	0.0138941	0.000395017	0.00319874	0.00104132	0.00115996
FCA_GND8125922_GTCACGGAGCATGGCA	0.00449534	0.000782543	0.00123533	0.0172487	0.0010925	0.338487	0.00312379	0.00138735	0.144448	0.000778955	0.00134582	0.00175704	0.00300933	0.000911753	0.000990172	0.00174231	0.00449807	0.000849885	0.00116172	0.0136244	0.43177	0.0252592
FCA_GND8125922_GTCATTTGTATAGGTA	0.00568855	0.00417436	0.00866076	0.0501247	0.0133939	0.0359789	0.010806	0.128778	0.318163	0.00164808	0.00179296	0.211485	0.034371	0.016721	0.0228655	0.0163569	0.00273176	0.0248291	0.00173631	0.0616692	0.00708341	0.0209418
FCA_GND8125922_GTCGGGTCAAGTTCTG	0.000581958	0.000471903	0.000904994	0.0125907	0.000948822	0.0134576	0.00580431	0.00183218	0.0231827	0.000353761	0.00016801	0.00652995	0.00537552	0.840989	0.0616817	0.00734843	0.000374209	0.00160256	0.000168548	0.0146215	0.000572096	0.000439016
FCA_GND8125922_GTCGTAAAGAGACTTA	0.00187905	0.00127237	0.00247163	0.0226034	0.00194494	0.0633659	0.00263788	0.00200285	0.0853198	0.00115721	0.000840054	0.0334635	0.00563217	0.724546	0.0215322	0.014564	0.00109219	0.00185808	0.00079262	0.00866885	0.00117496	0.00118026
FCA_GND8125922_GTCTTCGCAAGCGATG	0.00139714	0.00046949	0.00161047	0.141811	0.00182206	0.0641477	0.00173895	0.00551503	0.632047	0.000555883	0.00118261	0.0483536	0.00679785	0.00132495	0.00862667	0.00360437	0.000870082	0.00163498	0.000421288	0.0736088	0.00113492	0.00132581
FCA_GND8125922_GTGAAGGAGTTGAGTA	4.32169e-06	1.05187e-05	6.79116e-06	0.00029101	8.6262e-06	0.000640088	2.18443e-05	1.50076e-05	0.00247317	0.995594	0.00049965	5.86873e-05	4.40814e-05	2.19025e-05	2.68731e-05	9.27382e-05	9.97753e-05	6.66234e-06	7.06764e-06	4.24201e-05	1.20012e-05	2.31103e-05
FCA_GND8125922_GTGAAGGGTAGCGATG	0.0458019	0.0155956	0.018042	0.0428355	0.0203411	0.100192	0.0340165	0.0287807	0.0873911	0.195365	0.0423357	0.0562703	0.03002	0.108163	0.0185196	0.0290827	0.0338482	0.0158319	0.0124588	0.0329996	0.0174506	0.014658
FCA_GND8125922_GTGCAGCAGCGCTTAT	0.00508962	0.00186796	0.00814792	0.108994	0.00531567	0.101115	0.021042	0.292317	0.286622	0.00166639	0.00131198	0.0429741	0.0120948	0.0153422	0.031318	0.00701187	0.00237651	0.00703406	0.00123751	0.0256515	0.00625138	0.015219
FCA_GND8125922_GTGCAGCAGTGGACGT	0.00826365	0.00678461	0.0149674	0.0256571	0.0253378	0.23631	0.0147311	0.0121798	0.229215	0.00547555	0.00491161	0.0469086	0.00925077	0.018345	0.186079	0.010576	0.0189021	0.0186488	0.00570408	0.0377998	0.0198785	0.0440746
FCA_GND8125922_GTGCATAGTAAGGGAA	0.0103509	0.00368583	0.0467389	0.0328355	0.00467441	0.039288	0.00692343	0.0251567	0.183921	0.00142755	0.00126131	0.357594	0.0173573	0.0860643	0.100556	0.00478519	0.0019721	0.014286	0.001496	0.0472369	0.00465109	0.00773822
FCA_GND8125922_GTGCATAGTCGAAAGC	0.00153615	0.00194552	0.0101813	0.0510888	0.00266883	0.0437218	0.00477633	0.136577	0.244064	0.000501008	0.000440309	0.380708	0.00644491	0.00754664	0.0213002	0.00470065	0.00133867	0.00866914	0.000405265	0.0586944	0.00515187	0.00753994
FCA_GND8125922_GTGCATATCCTGCTTG	0.00201005	0.000824332	0.00158716	0.210162	0.00327923	0.0937894	0.000896737	0.0236796	0.587626	0.000671327	0.000323678	0.0235156	0.0114328	0.00225321	0.0037374	0.00454646	0.00182544	0.00263707	0.0002769	0.0189332	0.00273865	0.00325367
FCA_GND8125922_GTGCGGTCATCAGTCA	0.00152737	0.000622753	0.00223648	0.0602379	0.00642445	0.0710833	0.000506346	0.0545737	0.516451	0.000440455	0.000559567	0.250622	0.00980574	0.00135545	0.00182373	0.00299766	0.0005699	0.00210218	0.000547925	0.0117444	0.00147672	0.00229075
FCA_GND8125922_GTGCTTCAGTCATCCA	0.00547746	0.00439008	0.0137154	0.0505316	0.00620492	0.0422498	0.0278194	0.180291	0.279402	0.00308473	0.00512766	0.0726425	0.0296367	0.0439753	0.112945	0.0156936	0.00414861	0.0200775	0.00972295	0.0533138	0.0104547	0.00909577
FCA_GND8125922_GTGGGTCTCTCTTGAT	0.00268581	0.00151026	0.0027766	0.123785	0.00372322	0.306362	0.000718136	0.026566	0.457057	0.000597658	0.000599457	0.0203321	0.0118869	0.00119579	0.0112482	0.00608552	0.00141172	0.0013322	0.00374353	0.0114018	0.00201055	0.00297095
FCA_GND8125922_GTGTGCGAGAGCTATA	0.00320032	0.00189699	0.074809	0.0544926	0.00465256	0.0727027	0.00276144	0.113745	0.112043	0.000822028	0.000736948	0.437606	0.00799211	0.0146821	0.0633497	0.00425453	0.0013001	0.00660753	0.000937618	0.0152434	0.00271279	0.00345137
FCA_GND8125922_GTGTGCGAGATCCCAT	0.00353126	0.00703654	0.00585409	0.0400567	0.00808274	0.0495863	0.0121749	0.230385	0.371709	0.00273081	0.00322119	0.0500879	0.014407	0.0105994	0.0239362	0.00940087	0.00577056	0.0212952	0.00340549	0.0778408	0.00631805	0.04257
FCA_GND8125922_GTGTTAGGTCCCTACT	0.00622618	0.0020578	0.00220288	0.0429647	0.00466434	0.322919	0.0132515	0.00418732	0.240007	0.00254555	0.00215839	0.00443166	0.00765734	0.00202994	0.00363701	0.0154151	0.0111583	0.0104878	0.0142547	0.0514339	0.18794	0.0483694
FCA_GND8125922_GTGTTAGGTGCAACTT	0.031383	0.0030611	0.0064481	0.026175	0.00313557	0.0751581	0.00354066	0.0111834	0.079106	0.00279622	0.00240384	0.0116242	0.00529035	0.00641113	0.0125983	0.00406177	0.00523973	0.00622859	0.0157058	0.591481	0.0355216	0.0614465
FCA_GND8125922_GTTAAGCGTTAGGGTG	0.00521849	0.0127623	0.014701	0.0145539	0.00628077	0.0357067	0.00833439	0.0461618	0.138131	0.00357226	0.00380448	0.315317	0.19138	0.0248186	0.0827384	0.0212575	0.00491339	0.0125246	0.00396544	0.0331065	0.00764982	0.0131011
FCA_GND8125922_GTTACAGAGTATCGAA	0.00334128	0.00310978	0.00446838	0.0145524	0.00843925	0.0219364	0.0199037	0.011888	0.0501596	0.00273098	0.00198907	0.187322	0.0151525	0.56802	0.00825579	0.0190302	0.00259249	0.0248613	0.00211551	0.0242329	0.00332673	0.00257153
FCA_GND8125922_GTTACAGAGTGGTAAT	0.00329719	0.00306516	0.00576419	0.0757653	0.016098	0.0768214	0.00762997	0.155329	0.457589	0.00108771	0.00143318	0.0704962	0.023868	0.00862616	0.0151355	0.0172024	0.003151	0.0230291	0.00109216	0.0222552	0.0043535	0.00691022
FCA_GND8125922_GTTCTCGTCAGTTAGC	0.00657285	0.00495493	0.0168886	0.0973342	0.00970962	0.0377949	0.00688312	0.104265	0.41956	0.00224942	0.00249763	0.10029	0.028843	0.00965285	0.0251496	0.0102646	0.00253986	0.0071896	0.00232303	0.0931367	0.00394433	0.00795623
FCA_GND8125922_GTTCTCGTCTACCAGA	0.00184906	0.00100221	0.00198582	0.0467791	0.0071546	0.164315	0.00455367	0.182851	0.493204	0.000923633	0.000661263	0.0221124	0.0137676	0.00467712	0.00832844	0.00805764	0.00145066	0.00886744	0.000512181	0.0209165	0.00142254	0.00460915
FCA_GND8125922_GTTTCTAAGATGCCTT	0.00134793	0.00171155	0.00193108	0.133882	0.00297126	0.096847	0.552881	0.0072803	0.100816	0.00191006	0.00116359	0.00515172	0.00298563	0.00222354	0.00131248	0.00382353	0.00334895	0.00173318	0.00144086	0.0100059	0.059606	0.0056257
FCA_GND8125922_GTTTCTACAAACCCAT	0.00191932	0.00535218	0.0630154	0.120304	0.00172447	0.0375388	0.00127902	0.00158558	0.0756716	0.00070909	0.00077301	0.143789	0.00760614	0.00413479	0.507343	0.00251001	0.000943732	0.00118083	0.000873729	0.0181729	0.00135304	0.00222021
FCA_GND8125922_GTTTCTATCTGTCTAT	0.002522	0.00162442	0.015837	0.0645028	0.00297285	0.148051	0.00181566	0.0478027	0.538748	0.000884944	0.000725047	0.0626911	0.00537959	0.0132778	0.0104142	0.0105677	0.00259295	0.00504259	0.00072634	0.0558232	0.00180137	0.00619697
FCA_GND8125922_TAAACCGAGATAGCAT	0.00032694	0.00011803	0.000866684	0.00883797	0.000747982	0.00847822	0.000308156	0.9222	0.0223516	0.000135598	0.00018695	0.0167153	0.00133812	0.00183171	0.00397236	0.00593544	0.000194574	0.00170567	0.000187545	0.000789955	0.000641094	0.00213038
FCA_GND8125922_TAAACCGCAGGAATGC	0.00238341	0.00187689	0.0349491	0.0366887	0.00437318	0.0455047	0.00196321	0.157819	0.104824	0.00102956	0.00109686	0.126943	0.0155981	0.143687	0.289372	0.00646986	0.00139337	0.00999759	0.00125715	0.00797419	0.00196517	0.00283358
FCA_GND8125922_TAAACCGTCATTCACT	0.00153218	0.00141099	0.00194174	0.0703218	0.00616351	0.4386	0.0072291	0.0343997	0.343893	0.00255928	0.00203286	0.0138172	0.00398382	0.00288893	0.00242955	0.00820868	0.00572634	0.00488222	0.00100312	0.0392263	0.00203934	0.00571008
FCA_GND8125922_TAAGAGACAGGATTGG	0.0027417	0.00278516	0.0167441	0.0466882	0.0197939	0.110636	0.00427327	0.0137328	0.466561	0.00127988	0.00139673	0.156896	0.00669751	0.00589857	0.100797	0.00368613	0.00182085	0.00589288	0.00140108	0.0217127	0.00283793	0.00572654
FCA_GND8125922_TACACGATCTTGCCGT	0.00422879	0.00187193	0.0339984	0.0310349	0.00369746	0.0477711	0.00647232	0.0629826	0.24554	0.000860134	0.000843827	0.281983	0.0120085	0.0345851	0.186574	0.00738388	0.00142205	0.00762828	0.00103429	0.0190352	0.00359623	0.0054486
FCA_GND8125922_TACAGTGAGTCAAGCG	0.013475	0.00388066	0.277342	0.00903442	0.0033645	0.010168	0.00759984	0.26539	0.0241455	0.00179284	0.00168602	0.0816916	0.0136444	0.0663235	0.128019	0.00373023	0.00221244	0.0450084	0.00280145	0.0304553	0.00336422	0.00487048
FCA_GND8125922_TACAGTGGTCGGCACT	0.00275892	0.0014953	0.00602269	0.0457782	0.00783243	0.0318952	0.0109946	0.547321	0.157962	0.000676707	0.00038242	0.0881846	0.0120628	0.0104958	0.0105933	0.00924418	0.00112081	0.0223391	0.000424476	0.0221489	0.00498458	0.0052824
FCA_GND8125922_TACCTTACAAGTCTAC	0.00447251	0.00431292	0.0199784	0.0891624	0.00557989	0.0218131	0.00974156	0.0608419	0.0846571	0.00328927	0.00286435	0.104881	0.0221337	0.241924	0.187566	0.0208831	0.00707442	0.0304625	0.00394116	0.0558562	0.0101461	0.00841872
FCA_GND8125922_TACCTTACACGGTAAG	0.000129202	0.000202394	0.000604172	0.00128712	0.000319335	0.0743944	0.00140251	0.000985554	0.0316769	0.000156239	0.000189946	0.00212747	0.00141191	0.000793903	0.871098	0.00177545	0.00158527	0.00174016	0.000219984	0.000980215	0.002889	0.00403052
FCA_GND8125922_TACCTTATCGCCAAAT	0.000263742	0.000428229	0.000276179	0.0744482	0.00129607	0.00918205	0.851197	0.00088149	0.0209288	0.000308921	0.000224366	0.000673493	0.00121103	0.000238199	0.00021974	0.00605861	0.00131381	0.000585727	0.000207361	0.00177176	0.0274762	0.000809463
FCA_GND8125922_TACGGATTCATCGCTC	0.0066114	0.00753601	0.0173347	0.0561892	0.0834747	0.0620878	0.010829	0.0529839	0.471736	0.00391459	0.00518031	0.0592836	0.0192927	0.0115163	0.0474826	0.0135775	0.00443871	0.0206366	0.00425017	0.0276226	0.00578053	0.00824149
FCA_GND8125922_TACGGGCGTGTTAAGA	0.00192636	0.000822079	0.00840208	0.0694575	0.00252405	0.189266	0.00105443	0.00895027	0.532544	0.000601186	0.000607328	0.095636	0.010902	0.00447907	0.0136013	0.00443592	0.00153107	0.00263167	0.000711845	0.0385536	0.00251182	0.00885033
FCA_GND8125922_TACTTACAGACTAGGC	0.0146559	0.0113421	0.017911	0.0465888	0.0770815	0.0646208	0.0267671	0.0368134	0.0660902	0.0151725	0.00793457	0.148078	0.0280854	0.218521	0.0522925	0.022035	0.011052	0.0276718	0.00821487	0.0775948	0.0106718	0.0108043
FCA_GND8125922_TAGACCATCACGATGT	0.00590855	0.00498645	0.0192924	0.0555674	0.0234537	0.0884604	0.00591489	0.131706	0.142552	0.00214495	0.00226612	0.265555	0.0174197	0.0141369	0.0773038	0.00737249	0.00334082	0.0482421	0.00233239	0.0676923	0.00601772	0.00833359
FCA_GND8125922_TAGACCATCTGACCTC	0.0062144	0.00458608	0.00757594	0.0573127	0.00727405	0.110298	0.00896284	0.0104115	0.16757	0.00410571	0.00356509	0.0262993	0.0203088	0.0933634	0.31364	0.0427595	0.00684461	0.00708598	0.00416835	0.0778055	0.0081103	0.0117385
FCA_GND8125922_TAGCCGGAGTTAGCGG	0.00110723	0.00106536	0.0097766	0.00789222	0.00332708	0.0488238	0.0023453	0.0241348	0.221126	0.000915386	0.00132492	0.594792	0.0064007	0.0224332	0.00590592	0.00323022	0.000829434	0.0040502	0.000773579	0.0286632	0.00179891	0.00928365
FCA_GND8125922_TAGTTGGAGTCCAGGA	0.0156563	0.00250274	0.00739494	0.106362	0.00908571	0.140411	0.0110357	0.0128633	0.356831	0.00138247	0.00362111	0.181432	0.0194591	0.0145977	0.0143249	0.00726196	0.0032836	0.00621274	0.00177822	0.0562159	0.011372	0.0169145
FCA_GND8125922_TATGCCCAGACCACGA	0.0242384	0.00392469	0.0477641	0.0383977	0.00987654	0.0614813	0.00648003	0.0900047	0.233186	0.00244558	0.00236707	0.215538	0.0223197	0.0228674	0.134136	0.00608789	0.00356799	0.0124916	0.00226614	0.0478565	0.00522924	0.0074742
FCA_GND8125922_TCAACGAAGTCTCCTC	0.00134633	0.00103663	0.0126653	0.0351212	0.00348047	0.0772429	0.00500746	0.435133	0.151883	0.000523085	0.000310418	0.20264	0.00460692	0.00867095	0.016342	0.00406814	0.00218405	0.011424	0.000417567	0.0163992	0.00290131	0.00659606
FCA_GND8125922_TCAACGATCATGCTCC	0.000718985	0.000625178	0.0010395	0.0538138	0.00158877	0.0506571	0.00222936	0.0370919	0.722273	0.00037698	0.000592955	0.00435927	0.0117425	0.00169546	0.030877	0.0121036	0.000888691	0.0015361	0.000532167	0.0384219	0.00100753	0.0258287
FCA_GND8125922_TCAATCTCATACTACG	0.00992634	0.00670828	0.0702005	0.0910412	0.00309756	0.0325304	0.00949914	0.00667765	0.151466	0.0021336	0.00202798	0.139733	0.0221027	0.0332148	0.106568	0.00486334	0.0033795	0.00572066	0.00223724	0.287275	0.00337234	0.0062248
FCA_GND8125922_TCAATCTCATCGACGC	0.00227386	0.00224485	0.0118533	0.0775826	0.00411252	0.0994729	0.00319318	0.114738	0.364005	0.000932267	0.000776586	0.121303	0.00662757	0.00640712	0.134573	0.00397593	0.00151957	0.00459881	0.000863731	0.0293674	0.00299067	0.00658804
FCA_GND8125922_TCAATCTGTATATCCG	0.000169849	8.31667e-05	9.11595e-05	0.000772342	0.000266186	0.00928352	0.000524683	8.02539e-05	0.0127773	0.000474145	3.71527e-05	0.0141172	0.000743699	0.950027	0.000343698	0.00129622	3.89537e-05	0.000149723	3.0686e-05	0.00860812	4.5994e-05	3.92712e-05
FCA_GND8125922_TCAATCTTCATAAAGG	0.00607048	0.00273939	0.0155503	0.115707	0.0101103	0.0776232	0.01199	0.0743691	0.313157	0.00177786	0.00194159	0.0945734	0.03028	0.0150968	0.0676475	0.0361542	0.00286584	0.0140527	0.00210677	0.0683561	0.010957	0.0268738
FCA_GND8125922_TCACAAGAGCTTCGCG	0.000158763	4.47236e-05	6.36176e-05	0.00285298	0.000127481	4.46549e-05	3.52651e-05	8.81482e-05	0.00181389	0.000113059	0.993613	9.85205e-05	0.000179872	0.000188598	3.8696e-05	4.66988e-05	0.000167669	0.000102175	8.66136e-05	6.30128e-05	4.43377e-05	2.77617e-05
FCA_GND8125922_TCACAAGAGGGAGTAA	0.00193435	0.00155204	0.00283595	0.0363808	0.00339015	0.0262888	0.0161846	0.00694943	0.090922	0.000994723	0.00059407	0.0331604	0.0108107	0.640346	0.0560849	0.0226771	0.0011169	0.00578291	0.000707729	0.0376977	0.00184982	0.00173859
FCA_GND8125922_TCACAAGCATTGGTAC	0.00196241	0.00357489	0.00837751	0.106249	0.00678943	0.0582622	0.0156247	0.375041	0.255876	0.00131582	0.000761615	0.0664449	0.0166033	0.00812351	0.0347594	0.00832706	0.00133437	0.00946629	0.000749939	0.0158181	0.00180458	0.00273363
FCA_GND8125922_TCACAAGCATTTGCTT	0.00376034	0.0022278	0.0209819	0.0383258	0.0067968	0.0363846	0.00388025	0.338696	0.167771	0.00137168	0.00111933	0.13044	0.0276296	0.078239	0.0918451	0.00480139	0.00194932	0.0320783	0.00133696	0.00537276	0.00252365	0.00246904
FCA_GND8125922_TCACAAGGTTGACGTT	0.00163713	0.000942252	0.00359111	0.0975565	0.00562715	0.0431089	0.00506428	0.0414729	0.625858	0.000458215	0.00136748	0.0683483	0.0137222	0.00362263	0.03229	0.0132668	0.000989751	0.00548382	0.000518131	0.0241839	0.00443316	0.00645783
FCA_GND8125922_TCACGAATCACTCTTA	0.00918136	0.0132883	0.0234433	0.0572852	0.0616441	0.196143	0.00690786	0.0367088	0.220764	0.00673913	0.00525059	0.171452	0.0294057	0.0105007	0.0235704	0.0118865	0.00601505	0.019516	0.00511523	0.0691328	0.00623284	0.00981731
FCA_GND8125922_TCAGCAACACTTAACG	0.00193057	0.00251872	0.00839605	0.164376	0.00210427	0.365519	0.00235022	0.00142695	0.124455	0.000861559	0.00104511	0.0320419	0.00829681	0.00247066	0.26622	0.0025199	0.00170642	0.00124749	0.00113416	0.00474842	0.00199286	0.00263835
FCA_GND8125922_TCAGGATTCCTAGTGA	0.00104995	0.000892466	0.00213378	0.0192753	0.00247765	0.0687405	0.00483592	0.00963646	0.37676	0.00064507	0.000571712	0.00232334	0.00325991	0.00288613	0.446118	0.00829462	0.00175215	0.00324299	0.000819697	0.0103315	0.00309026	0.0308624
FCA_GND8125922_TCAGGTATCTTCAACT	0.0055593	0.00276004	0.00791491	0.0135861	0.00406435	0.0632412	0.0022519	0.673274	0.0618295	0.000734946	0.000598774	0.0409034	0.00709136	0.0421102	0.0263158	0.00505016	0.00130867	0.0161381	0.000909933	0.0122394	0.005186	0.00693186
FCA_GND8125922_TCATTACAGTGTACCT	0.00141697	0.000935538	0.00183724	0.0152942	0.00301841	0.0867072	0.00366189	0.0124972	0.0659517	0.00101315	0.000732742	0.0119938	0.00932078	0.279274	0.475623	0.0126676	0.00237029	0.00370162	0.000941667	0.00655086	0.00259161	0.00189898
FCA_GND8125922_TCCACACGTTGAACTC	0.000491216	0.000410865	0.00103587	0.00386691	0.00112676	0.0570948	0.00110544	0.0143589	0.0790899	0.000713519	0.000292773	0.0361083	0.00573677	0.765413	0.00509041	0.00560528	0.000365465	0.00214892	0.000367556	0.0182861	0.000564256	0.000727422
FCA_GND8125922_TCCCGATAGATCACGG	0.00140429	0.00100947	0.00367713	0.0260723	0.00137079	0.0334334	0.00258111	0.01819	0.0478726	0.000723066	0.000794164	0.0575703	0.00828047	0.350095	0.421011	0.00195949	0.00125425	0.00706711	0.000753936	0.0118657	0.0013365	0.0016775
FCA_GND8125922_TCCCGATAGGACAGCT	0.00101261	0.000887551	0.00362628	0.020974	0.0010434	0.0514128	0.0024916	0.0217582	0.770184	0.000456902	0.00176434	0.058367	0.0157022	0.00330208	0.0116562	0.00378009	0.00116311	0.00834469	0.00154337	0.01461	0.00223367	0.00368602
FCA_GND8125922_TCCCGATCAATCGGTT	0.00403027	0.00312804	0.0284017	0.191201	0.00360316	0.199161	0.00669317	0.00268045	0.151792	0.00150673	0.0015566	0.0642374	0.0126168	0.00506329	0.231476	0.00544908	0.00229831	0.0023977	0.00241653	0.0670951	0.00562866	0.00756572
FCA_GND8125922_TCGAGGCAGCAGATCG	0.00207593	0.00160276	0.030693	0.0957833	0.00344037	0.176591	0.0063754	0.011136	0.291603	0.000879601	0.00066369	0.111576	0.0074635	0.00396534	0.232129	0.0046437	0.0014272	0.00412958	0.000727681	0.00923156	0.00168232	0.00217928
FCA_GND8125922_TCGAGGCGTAAACGCG	0.00320051	0.00297304	0.0281393	0.0749684	0.00339448	0.0563256	0.0059056	0.108091	0.244067	0.000973709	0.000881932	0.28113	0.00972949	0.0265317	0.0498468	0.00603225	0.00206887	0.00952065	0.000985655	0.0665421	0.00473838	0.0139544
FCA_GND8125922_TCGCGAGGTACCGTAT	0.00133719	0.00164632	0.0359835	0.128133	0.00184073	0.0428074	0.00138434	0.0326334	0.631528	0.000565461	0.000514	0.043638	0.014881	0.0027222	0.0210426	0.00749893	0.000805706	0.00283209	0.000721311	0.024927	0.000930441	0.0016267
FCA_GND8125922_TCGGTAACAGGTCGTC	0.00412182	0.00309878	0.00239908	0.114987	0.00854221	0.0279395	0.00606607	0.213903	0.459625	0.00104565	0.000896671	0.0389764	0.0393024	0.00533202	0.0150768	0.0153655	0.00155383	0.00933915	0.0007925	0.0229502	0.00349527	0.00519094
FCA_GND8125922_TCGGTAACAGGTTTCA	0.0102164	0.00144262	0.0136739	0.0996128	0.00230695	0.0298082	0.00752307	0.0112934	0.246757	0.000687565	0.000529741	0.0982191	0.0161785	0.00498916	0.0363991	0.0105013	0.0010033	0.00304048	0.000994492	0.39686	0.00273764	0.00522557
FCA_GND8125922_TCGTACCGTTGAGGTG	0.580524	0.00637008	0.0121456	0.0829742	0.00712493	0.0481401	0.0052185	0.010567	0.0244957	0.00191661	0.0013578	0.0187156	0.00704049	0.00536609	0.0133372	0.00693996	0.00189449	0.00548095	0.00340297	0.0436219	0.0995987	0.013767
FCA_GND8125922_TCTCATACAGCCACCA	0.00121013	0.00135907	0.00203969	0.0250735	0.0050128	0.0127493	0.00309251	0.679905	0.17841	0.000399759	0.000338579	0.0481146	0.00521279	0.0036585	0.00659534	0.00435043	0.000663857	0.0104678	0.000303216	0.00939286	0.000725527	0.000925021
FCA_GND8125922_TCTCTAACATATGAGA	0.00175232	0.00149569	0.00411958	0.0106624	0.00478638	0.0151654	0.00369469	0.733583	0.105905	0.000628828	0.000484411	0.0207145	0.00611763	0.00746276	0.00809517	0.00323541	0.00136482	0.0412399	0.000788513	0.0156229	0.0025033	0.0105776
FCA_GND8125922_TCTGGAAAGACTTTCG	0.000552322	0.000495576	0.00102494	0.0581191	0.000856255	0.0432989	0.00206808	0.00340456	0.329267	0.00029144	0.00019581	0.00139973	0.00137727	0.000727843	0.036849	0.00741878	0.000421894	0.000614838	0.000302799	0.486012	0.000475861	0.0248269
FCA_GND8125922_TCTTCGGCACTTAACG	0.001792	0.00134829	0.000620911	0.0934546	0.00179367	0.218593	0.000936637	0.00130511	0.601198	0.00103347	0.000993482	0.00102707	0.00254945	0.000677004	0.00181118	0.00380683	0.00140048	0.00086484	0.00221069	0.0531006	0.00200503	0.00747739
FCA_GND8125922_TCTTCGGGTCATTAGC	0.00191906	0.0117345	0.0190834	0.0540457	0.00203039	0.039799	0.00397872	0.0144617	0.163877	0.000891816	0.000837193	0.0173284	0.0153958	0.00306511	0.464296	0.00665021	0.0012621	0.00369234	0.00120917	0.167618	0.00141231	0.00541179
FCA_GND8125922_TCTTTCCAGCTACCGC	0.00702496	0.0042813	0.00881487	0.0196726	0.00669597	0.204983	0.00791957	0.0169482	0.279613	0.00297974	0.00255113	0.0221087	0.0112253	0.0653937	0.258478	0.00907887	0.0165733	0.0105198	0.00327334	0.0168623	0.0159763	0.00902561
FCA_GND8125922_TGAAAGAAGGCAGTCA	0.00304975	0.00265706	0.0112664	0.0387482	0.00425176	0.0657446	0.00489532	0.0259984	0.503144	0.0009085	0.000995544	0.122839	0.0291415	0.0126521	0.0909518	0.0161311	0.00167836	0.00832166	0.00164627	0.0450419	0.0039919	0.00594444
FCA_GND8125922_TGACGGCAGAGCTGCA	0.00176317	0.000680563	0.000464786	0.0246919	0.00105862	0.108837	0.00115692	0.000795073	0.028145	0.00106237	0.000743649	0.000815299	0.00101377	0.000576037	0.000864239	0.00247143	0.00267481	0.000588305	0.00125772	0.00446023	0.769818	0.046061
FCA_GND8125922_TGACTAGGTAGAAAGG	0.0163152	0.0021212	0.00338387	0.0220159	0.00666525	0.191924	0.00226549	0.00314625	0.261251	0.00180664	0.00160976	0.00403478	0.00452393	0.00257906	0.0105699	0.00256618	0.00313991	0.00339332	0.00540047	0.0723904	0.0278027	0.351095
FCA_GND8125922_TGACTTTTCAAGCCTA	0.0037312	0.00108285	0.0065503	0.045744	0.00564106	0.0840499	0.00133063	0.0744606	0.400195	0.000847907	0.0010158	0.293677	0.0269452	0.00427026	0.00989098	0.00235222	0.00122555	0.00831943	0.000753501	0.0235616	0.00217456	0.00218027
FCA_GND8125922_TGACTTTTCTCGTTTA	0.00914205	0.00180314	0.0577865	0.0676488	0.0042683	0.0913438	0.00302052	0.0128311	0.236257	0.00106693	0.000724016	0.311999	0.0145042	0.0173277	0.0437142	0.00433585	0.00137583	0.0049409	0.000953603	0.102925	0.00403581	0.00799678
FCA_GND8125922_TGAGAGGAGCACCGCT	0.00690851	0.00179736	0.00672702	0.149287	0.00774249	0.0881483	0.00295964	0.0112334	0.484873	0.000859973	0.00298936	0.0995664	0.0135814	0.00451952	0.0156557	0.00953186	0.00274283	0.0051384	0.000885053	0.0715665	0.00686019	0.0064265
FCA_GND8125922_TGAGAGGTCCTTTCGG	0.00146004	0.000511699	0.0219927	0.0204756	0.0013048	0.0581423	0.000937235	0.103429	0.145112	0.000338881	0.000340137	0.595311	0.00383661	0.00774614	0.0133478	0.00126754	0.000676572	0.00849301	0.000224895	0.0119702	0.00179641	0.00128587
FCA_GND8125922_TGAGCATAGCGTTGCC	0.00437392	0.0016265	0.00718336	0.0782438	0.00689613	0.0905893	0.00767598	0.021992	0.578974	0.00101341	0.00063716	0.101169	0.00908162	0.00683238	0.00950918	0.00427405	0.00111184	0.00310024	0.000630812	0.0531322	0.00604857	0.0059055
FCA_GND8125922_TGAGCCGAGAGGGCTT	0.00818982	0.00200382	0.00957379	0.0787386	0.00811519	0.0715749	0.00747011	0.0788466	0.388891	0.00120601	0.000562427	0.128722	0.00840759	0.00791137	0.0354576	0.00576223	0.00132752	0.00754761	0.000700059	0.120376	0.00742339	0.0211925
FCA_GND8125922_TGAGCCGCAATCTACG	0.00273703	0.00445219	0.0125148	0.141914	0.00498131	0.0348954	0.00561888	0.257158	0.310859	0.000907377	0.000815259	0.0643931	0.025066	0.0111986	0.0382571	0.0242172	0.00147982	0.00965061	0.00109688	0.0411632	0.00187218	0.00475226
FCA_GND8125922_TGAGCCGCAGACGCTC	0.0168881	0.00663846	0.0100253	0.0234625	0.0669322	0.0633101	0.0221674	0.14233	0.151143	0.00523115	0.00636126	0.13572	0.0322015	0.0148173	0.0217555	0.0205011	0.00774065	0.074356	0.00509037	0.146848	0.00994637	0.0165343
FCA_GND8125922_TGCCCATCATGAGCGA	0.0029417	0.00331395	0.011856	0.0896289	0.0103746	0.266713	0.0314503	0.122588	0.184991	0.00383134	0.00146169	0.118668	0.00665283	0.00784302	0.0140741	0.01524	0.00528796	0.0223839	0.00167141	0.0473023	0.0104642	0.0212622
FCA_GND8125922_TGCCCTAGTTTGACAC	0.00341272	0.00256292	0.00537441	0.0858129	0.00746015	0.056281	0.0184866	0.182721	0.464019	0.00190996	0.00168302	0.0709598	0.00458305	0.00787722	0.0188868	0.0235853	0.00277214	0.0165655	0.0011887	0.0167926	0.0028685	0.00419649
FCA_GND8125922_TGCGCAGAGTCACGCC	0.00149302	0.00112871	0.00348651	0.0203587	0.00457959	0.0444369	0.0467482	0.676083	0.12803	0.000707405	0.000600098	0.0192872	0.0144018	0.00449952	0.0108199	0.00343546	0.000996939	0.00742688	0.000712888	0.00761457	0.00159503	0.00155813
FCA_GND8125922_TGCGTGGCAGGCTCAC	1.28256e-05	2.2841e-05	4.53388e-06	5.22535e-05	1.08838e-05	0.000740818	2.08877e-05	1.51034e-05	0.000131559	0.997994	7.24931e-05	0.000179457	0.000206426	0.000160197	2.47617e-05	8.37811e-05	4.92382e-05	7.41611e-06	1.28938e-05	0.000143383	1.42217e-05	3.97264e-05
FCA_GND8125922_TGCTACCTCCCAAGTA	0.0100242	0.00962192	0.0109245	0.0216767	0.019371	0.186535	0.0224358	0.032753	0.13203	0.00754391	0.00828111	0.0326588	0.0178875	0.0175786	0.185266	0.0164886	0.0667851	0.0374475	0.00776748	0.0322123	0.0466255	0.0780847
FCA_GND8125922_TGGACGCGTGCTAGCC	0.00478594	0.002924	0.00645295	0.158928	0.00694622	0.0381004	0.014634	0.12665	0.321957	0.00108528	0.00145892	0.148865	0.0283673	0.0124961	0.0188912	0.0176788	0.0021968	0.0170668	0.000990915	0.0545205	0.00745249	0.00755114
FCA_GND8125922_TGGCTGGAGGACAGAA	0.000175805	0.000252064	0.0001773	0.0184862	0.00026758	0.0098194	0.00016016	0.000567427	0.917946	0.000120836	9.40548e-05	0.000280678	0.000541549	0.000131631	0.019594	0.00200966	9.61283e-05	0.000116952	0.000140607	0.0269296	0.000121937	0.0019705
FCA_GND8125922_TGGCTGGCACGAGGTA	0.00179416	0.00164309	0.00335427	0.0345071	0.00534896	0.0353969	0.00603401	0.371228	0.398138	0.000919365	0.00434633	0.0581325	0.0256573	0.0043618	0.0173182	0.0145807	0.00106668	0.00566246	0.000968638	0.00576545	0.00175813	0.00201794
FCA_GND8125922_TGGGCGTAGTTGAGAT	0.00217289	0.000268687	0.00206535	0.0541911	0.00130372	0.284077	0.000291684	0.00174831	0.57649	0.000276874	0.000174522	0.0182611	0.00645355	0.00103982	0.00763898	0.00108803	0.000903598	0.000614832	0.000226723	0.037659	0.000730036	0.00232367
FCA_GND8125922_TGGGCGTGTACCCAAT	0.000360208	0.000554954	0.000672043	0.00854842	0.00221356	0.773556	0.00137623	0.00278828	0.111229	0.000899241	0.000377589	0.00208042	0.00105342	0.00048001	0.00706394	0.00193727	0.0323138	0.0121219	0.000446227	0.00564794	0.00289313	0.0313862
FCA_GND8125922_TGTCCCACATGACATC	0.000527208	0.000380182	0.000364379	9.40002e-05	0.000117434	0.000978367	9.43606e-05	7.53694e-05	4.17034e-05	0.00039887	0.000571055	0.000178492	0.000248833	0.000100589	7.80805e-05	0.000104378	0.000211421	6.26527e-05	0.994914	0.00026625	0.000114628	7.75866e-05
FCA_GND8125922_TTAACTCAGCCTTGAT	0.00038816	0.000321871	0.000959022	0.0249662	0.00112494	0.0202496	0.00305887	0.00744832	0.0299255	0.000314749	0.000252118	0.00804908	0.00791307	0.745492	0.129802	0.00763824	0.000441496	0.00266331	0.000252713	0.00762787	0.000588407	0.000521825
FCA_GND8125922_TTAGGCAAGCAGCCTC	0.00662869	0.00570398	0.00437559	0.0444248	0.0165799	0.0371424	0.00812666	0.16245	0.374135	0.00288653	0.0026222	0.159909	0.016146	0.00951854	0.0116404	0.0163868	0.00325288	0.0142321	0.00288943	0.0401949	0.0155808	0.0451732
FCA_GND8125922_TTAGGCAGTGAAAGAG	0.00217598	0.00108416	0.00343297	0.103102	0.0058266	0.159631	0.00505468	0.0161882	0.534411	0.00104039	0.00145986	0.0511168	0.0143127	0.00365448	0.00946719	0.0107991	0.00172262	0.00393032	0.000775254	0.0608527	0.00213915	0.00782232
FCA_GND8125922_TTAGGCATCTCTTATG	0.00229414	0.00211405	0.00668494	0.087507	0.00376894	0.0522673	0.0119242	0.0143269	0.412754	0.000975751	0.0016035	0.215365	0.00949995	0.00513856	0.044013	0.00695331	0.00219389	0.00393664	0.00100853	0.0952155	0.00889599	0.011559
FCA_GND8125922_TTCCCAGAGTCATGCT	0.0339194	0.00522904	0.179437	0.0344709	0.00494036	0.0515553	0.00439683	0.00882868	0.0695033	0.00293953	0.00278304	0.0852198	0.0161056	0.0294552	0.368193	0.00546674	0.00376272	0.00689801	0.0049988	0.0594968	0.00807928	0.0143205
FCA_GND8125922_TTCCCAGCAGTGAGTG	0.00880249	0.00875141	0.0133268	0.0666868	0.0582327	0.0792976	0.0303853	0.0583138	0.182061	0.00735083	0.00620055	0.0332644	0.0195058	0.160988	0.130895	0.0197406	0.00838579	0.0252793	0.00679852	0.0530126	0.00961915	0.0131015
FCA_GND8125922_TTCGAAGCACAGCCCA	0.00666457	0.00118374	0.007741	0.255305	0.00776068	0.0676963	0.00638235	0.0082924	0.348104	0.000624179	0.000987172	0.166638	0.0111236	0.00421937	0.0159556	0.00667861	0.00156723	0.00471964	0.000497869	0.0624467	0.0104901	0.00492058
FCA_GND8125922_TTCGAAGTCTACCAGA	0.00129814	0.000827981	0.0020621	0.0779055	0.00415838	0.0570308	0.0012507	0.107055	0.624675	0.000416187	0.00173516	0.0514377	0.00549877	0.00361441	0.0269263	0.00777182	0.00136818	0.00468887	0.000445679	0.0127063	0.00184391	0.00528309
FCA_GND8125922_TTCTACAAGCTAGGCA	0.0040502	0.00246689	0.00966938	0.0340223	0.00400335	0.0922021	0.00779474	0.047382	0.0692005	0.00227442	0.00180552	0.0347951	0.0191846	0.456544	0.163998	0.00563378	0.00270372	0.0117171	0.00206712	0.0217498	0.00325616	0.00347883
FCA_GND8125922_TTCTCAATCACCTTAT	0.0002557	0.000294831	0.000462641	0.00865941	0.000393923	0.0581216	0.00123594	0.000355795	0.0685619	0.000158368	0.000184506	0.00112172	0.000657387	0.000712279	0.849497	0.000836622	0.00141397	0.000365908	0.000265359	0.00375704	0.00068379	0.00200395
FCA_GND8125922_TTCTCAATCTGCGACG	0.00671789	0.00551926	0.00747648	0.0102071	0.0160017	0.132535	0.00628726	0.367273	0.0516113	0.00343901	0.0027125	0.12956	0.015552	0.0110713	0.0107906	0.0231842	0.00620914	0.0798302	0.00266199	0.092876	0.00828918	0.0101959
FCA_GND8125922_TTCTTAGAGAGCCCAA	0.00295449	0.0013021	0.00434336	0.0458497	0.00448546	0.0108253	0.00392855	0.596492	0.178731	0.000484749	0.0011318	0.0639186	0.0240305	0.00921635	0.0148497	0.00471291	0.000717726	0.0115315	0.000549104	0.0170032	0.00142359	0.00151852
FCA_GND8125922_TTCTTAGCATCGGTTA	0.00419162	0.00256086	0.0145256	0.155097	0.00728711	0.203538	0.00910366	0.102216	0.264276	0.00141683	0.00128349	0.103183	0.00858679	0.00992722	0.00849005	0.0136526	0.00506727	0.0125881	0.0016718	0.0394703	0.0140635	0.0178027
FCA_GND8125922_TTCTTAGGTCGAGTTT	0.00247702	0.00169056	0.0152613	0.0590139	0.012894	0.0850059	0.00839131	0.358403	0.159459	0.00102222	0.000471774	0.204601	0.00370876	0.0131432	0.00893456	0.00619727	0.00150591	0.0305295	0.000601638	0.0142179	0.00683397	0.00563643
FCA_GND8125922_TTGCCGTTCGCTAGCG	0.00808176	0.0095243	0.10039	0.0590769	0.00930993	0.0484862	0.00470157	0.192521	0.112954	0.00144155	0.0010822	0.292204	0.0130965	0.0471326	0.0345284	0.00954724	0.00186833	0.0138406	0.00131632	0.023911	0.00635828	0.00862682
FCA_GND8125922_TTGCGTCAGACACGAC	0.00131465	0.00167186	0.00245011	0.0608846	0.0056301	0.00683171	0.01149	0.516563	0.132757	0.000392854	0.000646895	0.189459	0.00847721	0.00632706	0.00564158	0.0101068	0.00053363	0.0159559	0.000543995	0.0204717	0.000925832	0.000924281
FCA_GND8125922_TTGGAACAGCGTAGTG	0.00208634	0.00108855	0.00623934	0.0948829	0.00325636	0.124854	0.00503716	0.00559419	0.465224	0.000603815	0.000735002	0.128098	0.00681594	0.00336223	0.0453229	0.00507706	0.00140108	0.00306437	0.000614158	0.0820525	0.00496156	0.00962867
FCA_GND8125922_TTGGAACGTCCAGTAT	0.00274223	0.00167298	0.00863934	0.0353323	0.00593815	0.0430034	0.00352749	0.410292	0.292783	0.00098594	0.000718544	0.0819382	0.0265388	0.0215388	0.0145475	0.00601307	0.00146298	0.0149043	0.000762326	0.0173263	0.00339959	0.00593359
FCA_GND8125922_TTGTAGGAGGAATGGA	0.0033728	0.00242514	0.00245484	0.0823062	0.00299041	0.169671	0.489791	0.00477202	0.147379	0.00375048	0.00177361	0.0031984	0.00610475	0.00285066	0.00394249	0.00940055	0.0046911	0.00233867	0.00462432	0.00500514	0.0388542	0.00830397
FCA_GND8125922_TTTCCTCGTGTGCGTC	0.000639046	0.000366163	0.000421526	0.00340765	0.00339426	0.00358703	0.000487313	0.023157	0.0835268	0.0048014	0.85828	0.00136293	0.00255915	0.000661241	0.000920618	0.00128272	0.00317557	0.00480063	0.000402186	0.000802392	0.000922363	0.00104213
FCA_GND8125922_TTTGTCACATATGGTC	0.000990284	0.00122759	0.00571821	0.134357	0.00329527	0.0983212	0.000900443	0.0703201	0.531835	0.000526517	0.00170741	0.0875843	0.00707087	0.00375963	0.0242628	0.00980984	0.00114093	0.00212973	0.000549246	0.00911892	0.00103123	0.00434317
FCA_GND8125924_AAACCTGAGTGTTAGA	0.00716403	0.00468961	0.0088656	0.0390019	0.0144929	0.0430455	0.00396877	0.179378	0.318132	0.00306449	0.00331443	0.264755	0.0334926	0.0130573	0.0057848	0.0175669	0.00379926	0.00756901	0.00380032	0.0156122	0.00434264	0.00510246
FCA_GND8125924_AAAGATGTCATGGTCA	0.00530215	0.00262993	0.409279	0.00698866	0.00241167	0.0274697	0.00232667	0.0132055	0.0194733	0.0018481	0.00154318	0.222071	0.0284415	0.0294842	0.187072	0.00835059	0.0019373	0.004875	0.00168974	0.0117724	0.00370825	0.00812013
FCA_GND8125924_AACGTTGTCTTGCCGT	0.00491627	0.00282703	0.0596301	0.0280236	0.00263488	0.0190605	0.00456925	0.238196	0.0796161	0.000530376	0.000406533	0.420105	0.00486866	0.0262916	0.0362708	0.00338773	0.000966203	0.00971475	0.000527686	0.0481521	0.00316647	0.00613873
FCA_GND8125924_AACTCAGAGGAGTCTG	0.0103477	0.0256877	0.0693109	0.183248	0.00699606	0.0820075	0.00421279	0.061657	0.20159	0.00223673	0.0016216	0.12134	0.0292972	0.0426062	0.0592213	0.0142803	0.00244136	0.00580872	0.00197122	0.0562741	0.00625243	0.0115915
FCA_GND8125924_AACTCAGTCGTTACAG	0.0310152	0.0267157	0.126601	0.0354232	0.00974631	0.0471885	0.0068773	0.0281679	0.287196	0.00465375	0.00381738	0.176386	0.0426193	0.0404638	0.0538398	0.00748802	0.00530039	0.0222069	0.0128119	0.0194584	0.0057787	0.00624518
FCA_GND8125924_AACTGGTAGATGTAAC	2.43396e-05	3.16798e-05	2.04271e-05	0.000874817	2.3358e-05	5.78961e-05	8.42563e-06	5.20453e-05	0.000426175	2.13875e-05	1.87424e-05	2.45409e-05	0.00399007	1.92203e-05	6.1159e-05	0.994077	2.37849e-05	6.76922e-05	1.73503e-05	0.000144045	9.21172e-06	6.47166e-06
FCA_GND8125924_AACTGGTTCGTACGGC	8.97667e-05	0.000181049	0.00109518	0.0212126	9.29552e-05	0.00139579	0.000119661	0.00167021	0.00154871	0.000100161	7.48875e-05	0.000578386	0.00178549	0.000208738	0.000919866	0.968302	5.91097e-05	0.000157646	6.19461e-05	0.000170944	8.97836e-05	8.5186e-05
FCA_GND8125924_AACTTTCCATGGGAAC	3.95608e-05	5.08775e-05	0.000134943	0.00959915	6.89276e-05	0.0010049	3.24762e-05	7.38688e-05	0.00129274	0.000152605	5.27641e-05	8.29512e-05	0.0112892	2.04172e-05	8.26461e-05	0.975702	6.578e-05	0.000100813	1.47219e-05	8.85279e-05	3.40927e-05	1.56484e-05
FCA_GND8125924_AAGTCTGCAATCCAAC	0.00021122	0.000241366	9.35709e-05	0.0217902	0.000195736	0.000166188	0.000136316	0.000192583	0.00111832	0.000175188	7.64279e-05	0.00010026	0.00408067	6.17228e-05	0.000147537	0.970531	7.62952e-05	0.000230222	5.67734e-05	0.000212727	5.7898e-05	4.78715e-05
FCA_GND8125924_AATCCAGAGCGGATCA	0.001426	0.000813566	0.00276844	0.0116833	0.00596344	0.00993494	0.00330849	0.401567	0.039858	0.000530004	0.000268515	0.137325	0.0033339	0.00554834	0.00253714	0.000755566	0.00132359	0.363677	0.000239059	0.0054935	0.000901321	0.000743362
FCA_GND8125924_AATCGGTAGACAGACC	7.84431e-06	9.47423e-06	1.57187e-06	0.00212472	1.95828e-05	0.000372897	2.50739e-05	2.70635e-05	0.000749911	2.40856e-05	2.33368e-05	2.61254e-06	0.00142887	1.05973e-05	6.46042e-06	0.995009	2.45243e-05	2.79049e-05	1.30425e-05	5.13188e-05	3.48841e-05	5.68315e-06
FCA_GND8125924_AATCGGTCAAGCCATT	0.0143635	0.00304934	0.0222249	0.0119877	0.0124527	0.0251639	0.0265522	0.566813	0.100853	0.00254679	0.00224599	0.0642852	0.0673977	0.0103039	0.0169514	0.00710871	0.00298082	0.0114198	0.00304454	0.0197112	0.0040368	0.0045076
FCA_GND8125924_ACACCCTCAATGGTCT	0.0126752	0.00750846	0.00997569	0.0280698	0.0376458	0.0255928	0.0175273	0.0242617	0.0437372	0.00835791	0.00499409	0.0205722	0.258078	0.012046	0.00780487	0.358779	0.0112497	0.0744287	0.0050586	0.0181629	0.0072075	0.00626675
FCA_GND8125924_ACACCCTCAGATGGGT	0.009251	0.0554806	0.0448859	0.0402942	0.0060579	0.0474188	0.00561441	0.0398761	0.254032	0.00356389	0.00340862	0.10038	0.0364653	0.0139493	0.125047	0.0249433	0.00435724	0.00856597	0.00682445	0.150685	0.00725171	0.0116477
FCA_GND8125924_ACACCCTGTTGAGTTC	0.203982	0.00011649	0.00137331	0.000221176	9.15252e-05	0.000504932	8.12844e-05	0.000828407	0.000164816	0.000202457	0.000110228	0.000318763	0.000176657	0.000288627	0.000259772	0.000118136	0.000247064	0.000178083	0.000237231	0.750798	0.0172582	0.0224424
FCA_GND8125924_ACATACGCAGCCAGAA	0.0112023	0.00378973	0.0132583	0.0641708	0.0117465	0.0605551	0.00391209	0.122892	0.357073	0.00300919	0.00386129	0.247411	0.0108623	0.0278851	0.00746101	0.0105312	0.00356135	0.006582	0.00426701	0.0123569	0.0052844	0.00832647
FCA_GND8125924_ACATCAGAGGGATACC	1.97765e-05	3.81553e-05	1.85282e-05	0.011226	2.26166e-05	0.00015263	2.79284e-05	4.37933e-05	0.000434097	3.24073e-05	2.47168e-05	1.80225e-05	0.00615677	1.7289e-05	3.73246e-05	0.981555	3.18894e-05	4.34051e-05	1.40076e-05	6.34718e-05	1.18067e-05	1.08821e-05
FCA_GND8125924_ACATGGTCAGACGCCT	7.8952e-05	7.70287e-05	8.20143e-05	0.00390394	3.66804e-05	5.71526e-05	3.42184e-05	0.000113593	0.000298306	3.01251e-05	2.66013e-05	3.49859e-05	0.00411929	3.54337e-05	0.000128012	0.990431	3.63378e-05	7.09724e-05	2.13363e-05	0.00035814	1.88602e-05	7.13345e-06
FCA_GND8125924_ACATGGTTCGGCTACG	3.19323e-05	3.16995e-05	1.83418e-05	0.0395447	4.50026e-05	0.00180118	3.14205e-05	9.03057e-05	0.000832635	0.000514924	5.6555e-05	2.01071e-05	0.00229985	2.39899e-05	4.15757e-05	0.954134	0.000268538	5.85408e-05	1.79218e-05	4.10298e-05	6.10209e-05	3.42062e-05
FCA_GND8125924_ACCGTAAAGCGACGTA	0.00173736	0.00034647	0.0381468	0.00484325	0.00124678	0.00757754	0.000641404	0.654633	0.00535962	0.000304928	0.00036227	0.221885	0.00287309	0.0295893	0.00718872	0.00587097	0.00041564	0.0114755	0.000589727	0.00184971	0.00104423	0.00201885
FCA_GND8125924_ACCTTTAAGCCTCGTG	7.5968e-05	0.000134511	6.91288e-05	0.0721239	6.96398e-05	0.0025192	9.8928e-05	0.00029548	0.0264319	0.000105328	8.18966e-05	8.57748e-05	0.00762253	3.51811e-05	0.000429768	0.88933	4.73285e-05	5.9578e-05	3.6403e-05	0.000220817	4.28943e-05	8.35794e-05
FCA_GND8125924_ACCTTTAAGCGTGAAC	0.00890382	0.00254116	0.0476011	0.0461849	0.00491958	0.0694048	0.00697673	0.0286393	0.167274	0.00148454	0.00118333	0.344436	0.0102015	0.0100031	0.0719908	0.00484248	0.00311457	0.00589562	0.00196686	0.137664	0.00716507	0.0176073
FCA_GND8125924_ACGAGCCGTTACCGAT	0.000764583	0.00113843	0.0050634	0.0286065	0.00348711	0.00898523	0.00563974	0.740888	0.0519315	0.000501918	0.000560675	0.0551066	0.00313962	0.0299274	0.00848111	0.00760119	0.000876853	0.0376633	0.000575152	0.00542142	0.0017188	0.00192193
FCA_GND8125924_ACGATACAGCCTCGTG	0.00354265	0.00600044	0.0636985	0.0492731	0.00531584	0.036844	0.0041993	0.263655	0.181534	0.00137303	0.00116272	0.184102	0.0185195	0.076576	0.048958	0.0132974	0.00202396	0.00928418	0.00140389	0.020569	0.00343355	0.00523369
FCA_GND8125924_ACGATGTAGTGCGATG	0.280921	0.000831927	0.0142555	0.00117607	0.000627384	0.00144066	0.000551484	0.0221578	0.00134769	0.000410333	0.000346871	0.00387281	0.0011877	0.00312367	0.00282754	0.000550131	0.000540989	0.00283145	0.000798382	0.644052	0.00409214	0.0120565
FCA_GND8125924_ACGATGTTCTCGCATC	0.000610934	7.71207e-05	0.000186729	0.0131456	0.000173616	0.000562569	0.000158403	0.000627835	0.00881554	0.000168208	6.74333e-05	0.000277538	0.0223368	0.000121581	0.000358986	0.951322	9.78713e-05	0.000397797	4.59625e-05	0.000225731	0.000137122	8.48634e-05
FCA_GND8125924_ACGATGTTCTTCGGTC	0.00340924	0.00202275	0.134947	0.0443707	0.00260454	0.019605	0.0149162	0.0241055	0.0471451	0.00084897	0.000715463	0.532854	0.00795431	0.00661448	0.102395	0.00356891	0.00122887	0.00837543	0.00094978	0.0361681	0.0020168	0.00318341
FCA_GND8125924_ACGCAGCTCGAGAGCA	0.0146731	0.00394186	0.0308867	0.0448833	0.00463557	0.0518528	0.0037948	0.0728335	0.132496	0.00109666	0.000907018	0.425389	0.0157859	0.025293	0.0397893	0.00684067	0.00261476	0.0125864	0.00108393	0.0803778	0.00893911	0.0192984
FCA_GND8125924_ACGCCGAAGCCCGAAA	0.00125579	0.000664045	0.0148127	0.0066277	0.00286313	0.0120581	0.00136089	0.675152	0.0235716	0.000211369	0.000139602	0.195714	0.00230139	0.0097332	0.00854119	0.00209604	0.00043601	0.0338687	0.000203799	0.00444728	0.00166414	0.00227674
FCA_GND8125924_ACGCCGATCATAAAGG	6.57277e-05	3.90159e-05	4.36942e-05	0.0153256	1.60591e-05	0.000128271	0.00010462	0.000274545	0.000851138	2.75376e-05	3.30085e-05	4.35473e-05	0.00332101	4.79721e-05	7.57426e-05	0.979375	4.44981e-05	2.14563e-05	1.77116e-05	0.000122639	1.38988e-05	7.3909e-06
FCA_GND8125924_ACGGAGAAGACTCGGA	0.00029685	0.000267057	0.000154208	0.00134202	0.000310625	0.00241527	0.000183687	0.973008	0.0069553	7.58055e-05	4.15179e-05	0.00110446	0.00027422	0.000551127	0.000218695	0.000340698	0.000245458	0.00709443	0.000103076	0.00343462	0.000407032	0.00117577
FCA_GND8125924_ACGGAGAGTGGTAACG	0.000597438	0.000463689	0.0058884	0.00981461	0.00145611	0.00793282	0.00234939	0.737434	0.0631731	0.000410355	0.000489162	0.0701005	0.00504016	0.0486291	0.0136259	0.00426487	0.00050138	0.0228527	0.000407032	0.00308352	0.000633106	0.000852704
FCA_GND8125924_ACGGGCTAGCGTCAAG	0.090499	0.00317559	0.0376111	0.00678518	0.00296932	0.014654	0.00368485	0.0361766	0.0240872	0.00236197	0.00179153	0.00763148	0.00467857	0.00548876	0.00719271	0.0041967	0.00255366	0.00732509	0.00242708	0.656086	0.0284369	0.0501864
FCA_GND8125924_ACGGGCTGTTTGTGTG	0.00274611	0.00331285	0.050393	0.00482571	0.00395573	0.0395438	0.00249503	0.294783	0.0661647	0.000892629	0.000673182	0.391179	0.0136028	0.0329854	0.0138383	0.0026585	0.00122446	0.0614089	0.00113507	0.00788807	0.00198778	0.00230519
FCA_GND8125924_ACGGGCTTCGCACTCT	0.00837141	0.00239398	0.00607446	0.0107114	0.00823471	0.00865019	0.0026961	0.00608025	0.0197699	0.00215148	0.00116129	0.01905	0.382181	0.00989714	0.00327521	0.482749	0.00296791	0.00811052	0.0012938	0.0102526	0.00179999	0.00212787
FCA_GND8125924_ACGGGTCTCTGTGCAA	0.0148285	0.0139779	0.00733558	0.244076	0.00855328	0.00833548	0.0214034	0.0203672	0.0190277	0.00486734	0.00439563	0.0109601	0.116099	0.00902057	0.0099803	0.434639	0.00504069	0.0101529	0.00480813	0.0202029	0.006596	0.00533232
FCA_GND8125924_ACTATCTCATACAGCT	0.00454555	0.00394905	0.070003	0.0227496	0.00609696	0.0517587	0.00935878	0.0823924	0.180685	0.00139747	0.00127768	0.402922	0.0131668	0.0298653	0.0730691	0.00424632	0.00197799	0.0148029	0.00143675	0.0165582	0.00322704	0.00451278
FCA_GND8125924_ACTGATGAGGCTCTTA	0.0109503	0.00322824	0.0360053	0.0264379	0.00445299	0.024783	0.01246	0.291065	0.0549266	0.00182982	0.00137669	0.306978	0.0439559	0.0395208	0.0586064	0.0121127	0.00227827	0.0125565	0.00177817	0.0414304	0.00503495	0.0082326
FCA_GND8125924_ACTGATGGTCAAAGAT	1.13351e-05	2.69366e-05	1.36323e-05	0.0100019	3.41805e-05	0.000241149	0.000141184	6.21907e-05	0.00152374	3.00853e-05	2.62359e-05	2.16658e-05	0.00238554	2.78221e-05	0.000117276	0.985072	6.41905e-05	9.32397e-05	3.87647e-05	4.42249e-05	1.28104e-05	1.01744e-05
FCA_GND8125924_ACTGATGGTCAACATC	9.50423e-05	0.00012788	7.00844e-05	0.0546287	0.000165816	0.00299245	0.000526229	0.000490683	0.0178884	0.000175197	0.000110635	0.000112065	0.0157308	7.84507e-05	0.000104243	0.905722	0.000124795	0.000140344	6.03371e-05	0.000472977	9.51425e-05	8.74938e-05
FCA_GND8125924_ACTGATGGTTCGTGAT	1.40187e-05	1.82207e-05	4.86646e-05	0.000123057	4.99066e-05	0.000812618	1.88146e-05	0.993197	0.00143451	4.32999e-05	3.07616e-05	0.000639387	6.58054e-05	0.00020218	8.39885e-05	0.000175271	5.43418e-05	0.00254607	4.33276e-05	0.000123652	6.57556e-05	0.000209515
FCA_GND8125924_ACTGCTCGTGCCTGTG	0.00313621	0.00360479	0.00667854	0.0131487	0.0137723	0.0757269	0.00668635	0.475092	0.190946	0.00149036	0.00126061	0.0836524	0.00883607	0.0117616	0.00469145	0.00552704	0.00359411	0.0566508	0.00132224	0.0174165	0.00492994	0.0100752
FCA_GND8125924_ACTGTCCGTTCCGGCA	0.00100382	0.00030628	0.000330884	0.0295335	0.000347444	0.00401362	0.00104884	0.00149575	0.0250089	0.00122628	0.000277135	0.000765162	0.00946161	0.000322963	0.000449012	0.921099	0.000361131	0.000801322	0.000222431	0.000932428	0.000596504	0.00039601
FCA_GND8125924_ACTTACTAGCCAGGAT	0.000323276	0.000582729	0.000611248	0.0396039	0.000665835	0.00672692	0.000786214	0.00190693	0.00285002	0.000245222	0.000214332	0.000788829	0.045854	0.000551581	0.000912742	0.893504	0.000308789	0.00107725	0.000406743	0.0014722	0.000285903	0.000321409
FCA_GND8125924_AGACGTTCATCGGGTC	0.00439129	0.00502257	0.104174	0.0233705	0.00226813	0.0824896	0.001192	0.0332138	0.52831	0.00126212	0.000621896	0.119477	0.00639022	0.0247816	0.0383542	0.00577373	0.000985302	0.00246594	0.000967424	0.011111	0.001283	0.0020949
FCA_GND8125924_AGAGTGGAGATCCCAT	0.000645299	0.000376982	0.865013	0.00134372	0.000331311	0.00719135	0.000347693	0.00238385	0.0121183	0.000336102	0.000135904	0.0987851	0.0025217	0.00173687	0.00225474	0.000422216	0.000120729	0.00108214	8.81899e-05	0.00192887	0.000602292	0.000234051
FCA_GND8125924_AGATCTGGTACATCCA	0.0277234	0.010875	0.055437	0.0294661	0.00405832	0.0818299	0.00134537	0.0157614	0.10722	0.00114106	0.00117831	0.52222	0.0152445	0.00696814	0.0719743	0.00534203	0.00148317	0.00782313	0.00143219	0.0257182	0.00293032	0.00282773
FCA_GND8125924_AGATTGCAGTCATCCA	0.000680747	0.000403817	0.00142914	0.0103185	0.000282657	0.00221917	0.000250251	0.00092245	0.00351978	9.43272e-05	6.58401e-05	0.000752217	0.0100738	0.000410306	0.000748962	0.960059	0.000100942	0.00101944	9.85727e-05	0.00615456	0.000114095	0.000281386
FCA_GND8125924_AGCATACCACCACCAG	0.00817976	0.0095558	0.0536272	0.0224295	0.0104437	0.0343531	0.00759775	0.213944	0.097222	0.00239196	0.00224374	0.358722	0.0163987	0.0551665	0.0372892	0.00820546	0.00271417	0.0101797	0.00338996	0.0262243	0.0108649	0.00885659
FCA_GND8125924_AGCTCCTAGCTCTCGG	7.20664e-05	3.84159e-05	2.20936e-05	0.00865185	8.98425e-05	0.00302904	3.36689e-05	0.000503925	0.0196783	3.05167e-05	2.79219e-05	2.83836e-05	0.00383292	9.93914e-05	9.11427e-05	0.962775	7.00682e-05	0.00036081	2.71221e-05	0.000339816	0.000148528	4.92468e-05
FCA_GND8125924_AGGCCACGTTCCGGCA	0.000432563	0.00021393	0.0002961	0.046163	0.000122819	0.00169684	0.000205492	0.000831651	0.00616304	9.32868e-05	6.32445e-05	0.000162883	0.0264306	0.000132786	0.000338098	0.911901	0.00010678	0.000346861	5.00944e-05	0.00400206	0.000141194	0.000105715
FCA_GND8125924_AGGCCACTCACTTCAT	0.00503231	0.00358471	0.0183504	0.0411279	0.00588548	0.0405174	0.0144329	0.229343	0.324497	0.00138958	0.000853457	0.124877	0.00593277	0.00833719	0.0486597	0.00553681	0.0015993	0.0083467	0.0015143	0.0978827	0.00353096	0.00876811
FCA_GND8125924_AGGGAGTAGGGATCTG	0.00216015	0.00213272	0.0298932	0.00696054	0.00444697	0.0187312	0.000739475	0.370294	0.0532522	0.000291141	0.000140579	0.472927	0.00269338	0.00958909	0.00747616	0.00128469	0.000386545	0.00906297	0.000163131	0.00359333	0.00224294	0.00153831
FCA_GND8125924_AGGGAGTGTAGAAGGA	0.0019849	0.000485488	0.00132072	0.0368701	0.00102796	0.0571927	0.000335258	0.778635	0.022327	0.0003395	0.000494999	0.0775597	0.00416822	0.00241325	0.000502675	0.00224385	0.000476342	0.00145692	0.00035356	0.00822511	0.000819192	0.00076773
FCA_GND8125924_AGGTCCGCACATGTGT	6.50288e-05	4.02257e-05	2.41711e-05	0.00550345	5.46642e-05	6.45313e-05	0.000109957	0.00010478	0.000521574	3.13805e-05	2.88208e-05	2.51125e-05	0.0113864	2.66245e-05	6.76164e-05	0.981534	4.86281e-05	8.66298e-05	1.93306e-05	0.000227775	2.13447e-05	7.89099e-06
FCA_GND8125924_AGGTCCGCAGTAACGG	0.0119231	0.00390778	0.0481617	0.0120115	0.00894262	0.115867	0.00382439	0.0633653	0.515062	0.0054355	0.00255588	0.102222	0.0206677	0.0211903	0.00638605	0.00415313	0.0028241	0.0270119	0.00403059	0.0136801	0.00347268	0.00330494
FCA_GND8125924_AGTAGTCCAGATGGCA	0.00535057	0.00360726	0.0254849	0.0562984	0.00469554	0.0373483	0.0327803	0.024924	0.474599	0.00140647	0.00111244	0.109058	0.0236649	0.0148986	0.0817567	0.0124677	0.00267714	0.0048511	0.00146572	0.0587874	0.00911904	0.0136461
FCA_GND8125924_ATAAGAGAGTGTTGAA	0.00198972	0.00343384	0.00267484	0.0151973	0.00644704	0.0268833	0.0599413	0.660656	0.0797025	0.00230071	0.00168651	0.0440722	0.0389562	0.0154302	0.00701247	0.0115657	0.001775	0.00665036	0.00139059	0.00822896	0.00210459	0.00190024
FCA_GND8125924_ATAAGAGTCAAGATCC	0.00219413	0.0029654	0.0207174	0.00724809	0.00175827	0.0199107	0.0025305	0.266216	0.124489	0.000372591	0.000356162	0.444747	0.00912128	0.0250844	0.0396461	0.00506886	0.000603642	0.00378907	0.000337837	0.0162023	0.00175276	0.00488788
FCA_GND8125924_ATAGACCTCTTGGGTA	0.00316195	0.002544	0.0446074	0.042419	0.00561333	0.0321476	0.00313724	0.516099	0.0725004	0.000756254	0.000684294	0.104543	0.0172889	0.0303354	0.0624197	0.0101859	0.00104315	0.0229763	0.00091026	0.0152421	0.00382406	0.00756082
FCA_GND8125924_ATCATCTCAGCTTCGG	0.000871818	0.000190317	0.000376328	0.0243147	0.000733076	0.000932029	0.000952752	0.00190375	0.00249405	0.00014393	0.00011647	0.000304736	0.0436593	0.000209619	0.00141836	0.918632	0.000232362	0.00106797	0.000230598	0.000600781	0.000401957	0.000213068
FCA_GND8125924_ATCATCTGTGCTGTAT	1.77239e-05	2.28833e-05	1.95939e-05	0.263166	0.000117246	0.00848192	0.000285258	0.000333899	0.0460054	0.000183089	5.2009e-05	1.6222e-05	0.00140893	1.95918e-05	5.49002e-05	0.67808	4.89451e-05	3.04249e-05	2.33921e-05	0.00153286	2.22198e-05	7.75164e-05
FCA_GND8125924_ATCATGGAGGCTCTTA	0.00193448	0.000969751	0.183522	0.00596466	0.00149294	0.00749677	0.000963507	0.0725901	0.0146721	0.000298579	0.000172658	0.636017	0.0030665	0.0430959	0.0115364	0.000396158	0.000272603	0.0106081	0.000194897	0.00372287	0.000683907	0.00032817
FCA_GND8125924_ATCCACCGTGAACCTT	0.00972041	0.00675198	0.0801978	0.0691871	0.0106703	0.0817597	0.00852346	0.0812371	0.256163	0.00266335	0.00236304	0.145884	0.0624124	0.0399185	0.071242	0.0129962	0.00326319	0.0129073	0.00304236	0.0263426	0.00677992	0.00597443
FCA_GND8125924_ATCCGAAGTCCTAGCG	0.00817525	0.00473878	0.229729	0.0305685	0.00315268	0.0217284	0.00208864	0.0524851	0.0587838	0.000613088	0.000482374	0.422921	0.00835826	0.0347711	0.0668574	0.00262756	0.00081442	0.00631632	0.000613935	0.0376932	0.00319701	0.00328439
FCA_GND8125924_ATCGAGTTCAAGATCC	0.00584273	0.00306193	0.0877121	0.0672508	0.00593397	0.0713548	0.00236479	0.122701	0.162751	0.00155142	0.00122546	0.335044	0.0213302	0.026095	0.0458306	0.00383396	0.00163212	0.00818565	0.00155784	0.0165266	0.00385927	0.00435462
FCA_GND8125924_ATCTACTAGCTAGGCA	0.00721988	0.0029756	0.00355192	0.0389667	0.00602264	0.069348	0.0056127	0.377665	0.276097	0.00102226	0.000986964	0.0430821	0.021644	0.00743648	0.0118801	0.02314	0.00223573	0.0124041	0.00143323	0.0320356	0.00837562	0.0468642
FCA_GND8125924_ATGAGGGCATCTCGCT	0.00189302	0.00387173	0.0201548	0.0485748	0.0178199	0.0431078	0.0189183	0.527738	0.0842242	0.00085508	0.000689642	0.102326	0.0057559	0.00886653	0.00971565	0.00861792	0.0014989	0.0828033	0.000839394	0.00395978	0.00404852	0.00372112
FCA_GND8125924_ATGAGGGGTCCATCCT	0.000153925	0.000350266	0.000193017	0.0100367	0.00311884	0.000934147	0.00440114	0.00128683	0.00500169	0.000163603	0.000103888	0.000348936	0.0428352	0.000149323	0.000378698	0.927712	0.000260132	0.00157434	8.21888e-05	0.000529486	0.000288747	9.705e-05
FCA_GND8125924_ATGAGGGGTGAGGGAG	0.000671072	0.00287299	0.916442	0.00862404	0.000256704	0.00649164	0.000278724	0.000423963	0.00395587	0.000292235	0.000212418	0.019506	0.00976427	0.000921141	0.0255377	0.000687457	0.000209056	0.000371667	0.000196718	0.00170919	0.000267315	0.000307975
FCA_GND8125924_ATTACTCAGGTTACCT	0.00449939	0.00124769	0.000838873	0.000170151	0.000260456	0.000344201	0.000612278	0.000138879	9.14665e-05	0.0012606	0.000343409	0.000121308	0.000636247	0.000177718	0.000436383	0.000351447	0.000331623	0.000188344	0.987275	0.000358547	0.000207636	0.000108359
FCA_GND8125924_ATTACTCGTATCGCAT	0.000309728	0.00071767	0.000627998	0.00523511	0.000484461	0.779982	0.00531	0.00142735	0.137758	0.000598491	0.000313283	0.00497608	0.00196985	0.000677925	0.0149602	0.00306163	0.00648377	0.00132065	0.000306253	0.00284256	0.0213269	0.0093096
FCA_GND8125924_ATTCTACAGCACACAG	0.0131268	0.0124526	0.0860163	0.0284135	0.0219486	0.0682692	0.005935	0.149927	0.0707977	0.00450766	0.00325686	0.303743	0.086237	0.0292051	0.0283786	0.0249204	0.00452978	0.0194897	0.00376134	0.0167028	0.00679814	0.0115818
FCA_GND8125924_ATTGGTGCAAGTAATG	0.00197547	0.00149829	0.00241426	0.123746	0.00286311	0.045516	0.00176753	0.00440896	0.750126	0.00135504	0.00142021	0.00448427	0.0031367	0.00211877	0.012223	0.00474779	0.00129075	0.00161799	0.0015936	0.0263998	0.00160356	0.00369274
FCA_GND8125924_CAACTAGAGAGTACAT	0.000131888	8.86589e-05	9.83761e-05	0.0418012	0.000150298	0.00101625	0.000280411	0.000300114	0.000471744	0.000104421	7.05275e-05	7.99721e-05	0.0121123	0.000105033	0.000170273	0.942114	0.000117776	0.000210227	6.55979e-05	0.000326989	0.000112932	7.13562e-05
FCA_GND8125924_CAAGAAAGTGGCCCTA	0.0259266	0.00587243	0.0125232	0.0137337	0.00895451	0.0149287	0.00566507	0.0113744	0.0106351	0.00447807	0.00342224	0.042532	0.00581844	0.010917	0.0108057	0.00662641	0.00419728	0.00698432	0.00683684	0.0856722	0.187664	0.514432
FCA_GND8125924_CACACTCCATGGTCAT	0.000252016	0.000156755	0.000451212	0.0118502	0.000386359	0.00102411	0.000519697	0.00078115	0.00138746	0.00016051	7.60267e-05	0.000266917	0.362936	0.000306959	0.000840335	0.6163	0.000119647	0.000656752	0.000839832	0.000419672	0.000169411	9.87134e-05
FCA_GND8125924_CACAGGCAGACGCAAC	0.00767508	0.750676	0.000507328	0.00408677	0.000260226	0.00733159	0.000192599	0.000571924	0.172847	0.000907537	0.000231191	0.0041906	0.00176845	0.000469135	0.0296172	0.000604028	0.000270542	0.00053622	0.000484692	0.0165791	0.000101635	9.13719e-05
FCA_GND8125924_CACAGTATCTCTGAGA	0.000204186	8.96707e-05	8.59511e-05	0.0109385	0.0001378	9.85579e-05	0.000528196	0.000391327	0.000536321	4.33306e-05	4.94269e-05	6.93116e-05	0.00839498	4.68556e-05	0.000133951	0.977071	0.000103724	0.000170241	2.94389e-05	0.000767375	7.6158e-05	3.41756e-05
FCA_GND8125924_CACATAGTCGCAGGCT	0.000908159	0.00183102	0.00267313	0.0213362	0.00275555	0.0780328	0.00984263	0.295557	0.399512	0.000545841	0.00162794	0.131145	0.00530782	0.0113985	0.0128225	0.0080087	0.00166405	0.00612523	0.000568466	0.003762	0.00117069	0.00340363
FCA_GND8125924_CACCACTGTGGTTTCA	0.00956145	0.0178374	0.158736	0.0223112	0.00361161	0.0858316	0.00414505	0.0498895	0.055348	0.0016314	0.00158039	0.389327	0.0153883	0.0256205	0.0811172	0.021184	0.00253454	0.0112654	0.004767	0.0268516	0.00424906	0.00721193
FCA_GND8125924_CAGAATCCATTGTGCA	0.00226731	0.00233014	0.0595219	0.0325309	0.00730894	0.019552	0.00557839	0.613185	0.0470901	0.00091547	0.000815864	0.111078	0.0149495	0.0169731	0.0138072	0.00681663	0.00137602	0.0347538	0.00102345	0.00393257	0.00213132	0.00206286
FCA_GND8125924_CAGATCAAGCTAGCCC	0.00305517	0.00378228	0.00938974	0.0589119	0.0066945	0.104721	0.00587314	0.0631983	0.25312	0.0024758	0.00370011	0.284679	0.0127605	0.0173388	0.0109045	0.01842	0.00343364	0.00654475	0.00229088	0.0631207	0.00975795	0.0558273
FCA_GND8125924_CAGATCAGTCGTCTTC	0.00140542	0.000895708	0.0437159	0.0147258	0.00218379	0.0274695	0.000663659	0.544505	0.0479602	0.00035923	0.000327012	0.242594	0.00486229	0.0292692	0.014971	0.00263463	0.000656713	0.0099544	0.000395237	0.00577258	0.00105529	0.00362368
FCA_GND8125924_CAGATCAGTTACGGAG	0.0849044	0.00893267	0.00580543	0.00275873	0.00192114	0.00152649	0.00178888	0.00740824	0.00120673	0.0011468	0.000919156	0.00340712	0.0103326	0.00377408	0.0138001	0.00230926	0.00137899	0.00454311	0.814933	0.0155784	0.00789745	0.00372715
FCA_GND8125924_CAGCAGCTCGAATGCT	0.00470138	0.00248956	0.00898384	0.00868066	0.00652963	0.00826124	0.017978	0.836313	0.0134377	0.000642487	0.00055478	0.0315314	0.00703217	0.00749292	0.0212977	0.00203299	0.000686667	0.00784855	0.000933774	0.00859407	0.00182648	0.0021515
FCA_GND8125924_CAGCCGACAGGCTCAC	0.00015166	0.000106719	6.57544e-05	0.0733657	6.50395e-05	0.000491094	0.00017994	0.000298893	0.00150465	5.07348e-05	5.84552e-05	6.26279e-05	0.0120878	5.64791e-05	0.000195833	0.909753	5.91687e-05	0.000142158	5.84184e-05	0.00112841	5.52266e-05	6.21742e-05
FCA_GND8125924_CAGCCGACATATGAGA	0.00287603	0.00169921	0.028981	0.00604877	0.00348882	0.108424	0.00118221	0.154368	0.13944	0.00157887	0.000859874	0.474381	0.0197679	0.0284354	0.00369443	0.00196627	0.0010628	0.00735994	0.0011332	0.0106392	0.00118758	0.00142536
FCA_GND8125924_CAGCGACCATGTTGAC	0.01063	0.0136755	0.13602	0.0900331	0.0203114	0.0850181	0.00808666	0.098415	0.112273	0.00470662	0.00274346	0.174872	0.0225326	0.0190683	0.0703602	0.00946693	0.00454862	0.0359771	0.00649009	0.0454173	0.0184144	0.0109401
FCA_GND8125924_CAGCTGGTCCCGGATG	0.00524444	0.00712146	0.0170691	0.111519	0.0152838	0.0357364	0.0524978	0.454717	0.111527	0.00245205	0.00185733	0.0571555	0.0176231	0.01771	0.0156763	0.0143771	0.002685	0.0108196	0.00282458	0.0153525	0.019805	0.0109454
FCA_GND8125924_CAGCTGGTCCGCAAGC	0.0042695	0.00166544	0.0224822	0.0196869	0.00451737	0.0197856	0.0037946	0.525949	0.0581755	0.000765281	0.000699337	0.218552	0.0073005	0.0234275	0.0234452	0.00429228	0.00111317	0.0221636	0.000786691	0.0306364	0.00176704	0.0047255
FCA_GND8125924_CAGGTGCGTACAGTTC	2.63477e-05	2.40296e-05	2.27463e-05	0.330037	3.4471e-05	0.000459998	0.00226953	3.95978e-05	0.000317982	7.14113e-05	0.000157664	9.94725e-06	0.00484008	2.38302e-05	1.50413e-05	0.661355	0.00013348	3.30161e-05	1.75865e-05	6.88425e-05	3.23119e-05	1.02087e-05
FCA_GND8125924_CATATTCGTAACGCGA	1.60219e-05	3.62756e-05	0.00011965	0.018762	1.3537e-05	0.000280088	9.36623e-06	8.86409e-05	0.00145934	9.59228e-05	3.37717e-05	6.48164e-05	0.00243514	3.06625e-05	0.000172668	0.976237	2.8381e-05	6.15227e-05	8.00368e-06	2.62356e-05	1.1057e-05	9.70181e-06
FCA_GND8125924_CATATTCTCGGCTTGG	0.0213646	0.00316969	0.0488302	0.0103453	0.00262574	0.0256434	0.00295216	0.0409365	0.0972997	0.00137219	0.00116978	0.638436	0.0116815	0.013955	0.0204308	0.00337538	0.00167281	0.0143924	0.00147264	0.0336504	0.00231519	0.00290825
FCA_GND8125924_CATCAGACAAACTGCT	0.000500166	0.000937195	0.000989316	0.00147235	0.0033499	0.0260778	0.00117762	0.729656	0.0946879	0.000420273	0.00120433	0.0895918	0.00379809	0.00857971	0.00181936	0.0038927	0.000729601	0.0241993	0.000424831	0.0028706	0.00131368	0.00230731
FCA_GND8125924_CATCAGATCTATCCTA	0.00908943	0.0111897	0.0528354	0.0258112	0.00629858	0.0347754	0.0135311	0.124798	0.210905	0.00395291	0.00310887	0.259913	0.0157619	0.034275	0.0885537	0.025425	0.00486831	0.0139733	0.00339302	0.0338042	0.00882213	0.0149148
FCA_GND8125924_CATCCACAGTGTACGG	0.0025505	0.0027261	0.062048	0.0103755	0.00155478	0.0202175	0.00111335	0.00977129	0.0367	0.00056157	0.00049489	0.699094	0.00498772	0.0876224	0.0278794	0.00153937	0.000766678	0.00572363	0.000563978	0.01982	0.00192878	0.00196047
FCA_GND8125924_CATCGAAAGAGCAATT	0.00172053	0.000521958	0.629156	0.0123609	0.000807378	0.0180893	0.000323577	0.00466848	0.0176052	0.000257992	0.00021398	0.288736	0.0023493	0.00495232	0.0110013	0.000570014	0.000464993	0.00225444	0.000145315	0.00251253	0.000962044	0.000326088
FCA_GND8125924_CATGGCGAGACTACAA	0.0167775	0.00417586	0.0731143	0.0221923	0.00609938	0.0379466	0.00826989	0.298415	0.0773811	0.00191932	0.00168985	0.316316	0.00863499	0.0144039	0.0183622	0.00573972	0.00214224	0.0283273	0.00228953	0.0368746	0.00697341	0.0119548
FCA_GND8125924_CATTATCAGACAGGCT	5.44824e-06	9.34683e-06	2.92633e-06	0.00612408	1.84038e-05	0.000637825	1.38719e-05	0.000216334	0.00304398	3.0356e-05	2.24401e-05	8.28392e-06	0.00116868	4.89646e-06	1.97075e-05	0.988464	3.28766e-05	8.43569e-05	9.14856e-06	3.91314e-05	2.43492e-05	1.97789e-05
FCA_GND8125924_CCAATCCAGAGTGAGA	0.00169511	0.00203347	0.00318907	0.0292828	0.00261515	0.0286118	0.00391688	0.00910095	0.0204404	0.00131422	0.00106009	0.00369224	0.102768	0.00395862	0.00656449	0.761213	0.00131979	0.00478316	0.00136175	0.00652084	0.00170308	0.00285512
FCA_GND8125924_CCAATCCCACTAGTAC	0.00604181	0.00797564	0.123611	0.0787314	0.0126817	0.0697076	0.00820184	0.104109	0.203881	0.00235337	0.00206033	0.206614	0.0131248	0.0492315	0.046395	0.022627	0.00315846	0.013107	0.00206792	0.0123704	0.0058364	0.00611281
FCA_GND8125924_CCAGCGACAAGACACG	0.00129763	0.000887066	0.000844807	0.344202	0.00164404	0.00857127	0.00225378	0.00221541	0.0331307	0.00098542	0.000700927	0.00117307	0.0147407	0.00103447	0.00124842	0.576331	0.00140125	0.00161165	0.000652537	0.00212918	0.0018532	0.00109085
FCA_GND8125924_CCATTCGCACATGTGT	0.00179863	0.000960656	0.00111027	0.435649	0.000524526	0.00223935	0.00288691	0.00143485	0.0154808	0.000909468	0.000603101	0.00093939	0.0116801	0.00131772	0.000684379	0.51849	0.000401906	0.000878368	0.000296182	0.000849013	0.00048134	0.000383429
FCA_GND8125924_CCATTCGTCTGGTTCC	0.000933888	0.000914385	0.00508233	0.0132848	0.00394611	0.0329243	0.00174086	0.548516	0.220639	0.000782519	0.000857793	0.114911	0.00366094	0.00512862	0.0111951	0.00185636	0.000823414	0.00912335	0.000682078	0.010622	0.00354072	0.00883516
FCA_GND8125924_CCCATACGTCAGATAA	0.0026017	0.00137667	0.0552796	0.0197995	0.00734399	0.0201764	0.0033326	0.144161	0.028129	0.00053538	0.000390172	0.619442	0.00253659	0.0234407	0.00648356	0.00337627	0.00135974	0.0474009	0.000600655	0.00837442	0.00238248	0.00147659
FCA_GND8125924_CCCTCCTCATTGGCGC	0.0012842	0.000910855	0.00871038	0.0214968	0.0030917	0.0191775	0.00331727	0.644386	0.0794966	0.000286151	0.000188111	0.143616	0.00467174	0.0129587	0.0154322	0.00396863	0.000584778	0.0192371	0.000226078	0.0115026	0.00208441	0.00337165
FCA_GND8125924_CCGGGATAGCTAGTTC	6.69611e-05	6.53502e-05	4.01539e-05	0.00113251	1.33507e-05	0.000983419	3.92712e-05	6.4166e-05	0.000617684	3.416e-05	2.93525e-05	7.28196e-05	0.00335722	2.39522e-05	9.88163e-05	0.993085	4.16678e-05	6.5416e-05	3.92577e-05	8.62081e-05	2.49137e-05	1.81954e-05
FCA_GND8125924_CCGGTAGGTGATAAGT	0.00100815	0.00167185	0.00766868	0.0149886	0.00355559	0.00966525	0.00378267	0.488097	0.0691848	0.000248353	0.00013661	0.329542	0.00409297	0.00953023	0.0047448	0.00180763	0.00064635	0.0344416	0.000203495	0.0132295	0.000999479	0.000754321
FCA_GND8125924_CCGGTAGTCCAACCAA	0.00401044	0.00318428	0.00771606	0.0705678	0.0214244	0.0242474	0.190212	0.298181	0.186019	0.00185844	0.00128053	0.0706015	0.0188113	0.015305	0.0127617	0.0172902	0.00237051	0.0270849	0.001499	0.0168077	0.00473368	0.00403248
FCA_GND8125924_CCGTACTTCTCACATT	0.00253336	0.00555437	0.0184043	0.0314202	0.00455088	0.0205044	0.00313894	0.0805531	0.100142	0.00128862	0.000899992	0.644249	0.00979336	0.0453356	0.00831043	0.00315347	0.00111659	0.00656414	0.00090033	0.00849523	0.00159135	0.00150035
FCA_GND8125924_CCGTTCATCAACGAAA	0.00358744	0.00289133	0.0272461	0.0279527	0.00377581	0.0297001	0.00969825	0.0099675	0.117864	0.00104544	0.00107013	0.565717	0.00990066	0.0236374	0.111418	0.00553848	0.00206207	0.00441477	0.00143179	0.0270056	0.00615637	0.00791892
FCA_GND8125924_CCTACACTCTCTTATG	0.00696864	0.00451211	0.006891	0.0278421	0.00752305	0.537339	0.0188701	0.0151936	0.0550721	0.00417075	0.00346259	0.0129508	0.00895538	0.00846654	0.0633171	0.0130213	0.0563416	0.0117366	0.00355896	0.00886511	0.109925	0.0150157
FCA_GND8125924_CCTATTATCTTGACGA	0.0991148	0.00449916	0.0542965	0.00907738	0.00394305	0.0112311	0.0045505	0.0880064	0.0127097	0.00218318	0.00185592	0.0349809	0.00770951	0.013697	0.0228977	0.00411228	0.00267347	0.0144937	0.00279527	0.460518	0.00896705	0.135687
FCA_GND8125924_CCTCAGTAGCGAAGGG	0.00206256	0.00260379	0.0133502	0.0660401	0.00768816	0.113371	0.00234616	0.0617007	0.558062	0.00111397	0.00146639	0.0578958	0.00599581	0.00828799	0.0522359	0.00397318	0.00138365	0.00906736	0.0011162	0.0260543	0.00128976	0.00289471
FCA_GND8125924_CCTCAGTAGCTACCGC	0.00204771	0.00113506	0.0334829	0.0236313	0.00627581	0.0412573	0.0017642	0.128169	0.0497313	0.000623011	0.000526789	0.649101	0.00493094	0.0257722	0.011545	0.00283384	0.000710616	0.00742768	0.00062132	0.00435155	0.00211186	0.00194972
FCA_GND8125924_CCTCTGACAATCGAAA	0.0050527	0.00229565	0.0901086	0.00935376	0.0022058	0.0135979	0.00311267	0.262925	0.0374273	0.000328163	0.000266563	0.483574	0.00584327	0.0144807	0.0215844	0.00155641	0.000593043	0.00967059	0.000892964	0.0301302	0.00246526	0.0025357
FCA_GND8125924_CCTTCCCCAATGCCAT	0.0329506	0.000959695	0.0122195	0.00749514	0.00123129	0.00577174	0.000877533	0.0278867	0.00696778	0.000612246	0.000496685	0.00832881	0.00237299	0.00522121	0.00940873	0.000908318	0.000687368	0.00554492	0.000913765	0.851966	0.00203081	0.0151483
FCA_GND8125924_CCTTCCCCATTGGTAC	0.0132455	0.00750352	0.00588849	0.0395283	0.00713001	0.0432431	0.00784071	0.300584	0.225278	0.00292646	0.0027716	0.0693304	0.0125229	0.0183756	0.00775904	0.0125999	0.00579729	0.0464779	0.00351553	0.127472	0.00703807	0.0331715
FCA_GND8125924_CGACTTCAGTACGTTC	0.000201661	7.55344e-05	0.000105124	0.120968	8.51294e-05	0.00780563	0.000116233	0.000377956	0.00517744	9.64143e-05	0.000101031	4.98224e-05	0.0295004	0.000237356	0.000124432	0.831141	8.11499e-05	0.000285681	4.36354e-05	0.00328301	5.04121e-05	9.31292e-05
FCA_GND8125924_CGAGCCAGTGGCAAAC	0.00102865	0.0012879	0.00521044	0.00347875	0.00279049	0.0236396	0.00195281	0.486774	0.18237	0.000315278	0.000550846	0.234605	0.00828906	0.0115358	0.00416304	0.00327782	0.000924124	0.0189944	0.000784113	0.00407148	0.00145159	0.00250526
FCA_GND8125924_CGATCGGGTAAGTGTA	0.00478386	0.00264674	0.0289678	0.068002	0.00467746	0.0295946	0.0101966	0.371484	0.165965	0.0006421	0.000443816	0.148448	0.0103344	0.0151796	0.0358698	0.0083515	0.00132366	0.0185108	0.000601446	0.0627756	0.00388278	0.00731819
FCA_GND8125924_CGCGGTAAGGCCCGTT	1.93206e-05	3.49867e-05	8.5012e-06	0.492192	1.9204e-05	0.00164437	0.000151048	4.92358e-05	0.00103238	4.18187e-05	0.000141868	5.74799e-06	0.00358171	1.0399e-05	1.30301e-05	0.500572	0.00018913	5.52006e-05	1.80025e-05	0.000169135	4.23417e-05	8.38593e-06
FCA_GND8125924_CGCGGTACAAGACACG	0.00981489	0.00751491	0.187881	0.0445195	0.0157582	0.0603712	0.00877618	0.112732	0.0417281	0.00377142	0.00358577	0.254367	0.0234568	0.0277858	0.12759	0.0102895	0.00418318	0.0167845	0.00419836	0.0188226	0.00740541	0.00866438
FCA_GND8125924_CGCGTTTTCCGTCATC	0.000210405	0.000175643	0.000105227	0.0866744	0.000317323	0.000726929	0.000868151	0.000622251	0.00881146	0.000104781	0.000137735	0.000149061	0.00391398	0.000148159	0.000184471	0.895522	0.000179339	0.000289837	0.000103234	0.000391304	0.000244245	0.000120468
FCA_GND8125924_CGCTTCAGTACCCAAT	0.000150002	0.000354811	0.000167844	0.0186859	0.000383847	0.000918496	0.000559887	0.000704461	0.00325483	0.000103231	5.69447e-05	0.000193166	0.0878478	9.99374e-05	0.000517816	0.884197	0.000153958	0.000557315	7.39233e-05	0.000806597	0.000123003	8.87021e-05
FCA_GND8125924_CGGACACTCCGCATAA	0.00265324	0.00227252	0.00606166	0.00619804	0.00638785	0.0222222	0.00846217	0.710939	0.0279105	0.00161044	0.00132892	0.0720271	0.0166892	0.0298272	0.00629871	0.0054197	0.00168498	0.0606718	0.0014705	0.00564572	0.002147	0.00207193
FCA_GND8125924_CGGACTGCAAGTTCTG	0.00666165	0.00544045	0.0109211	0.0752051	0.0275771	0.0783019	0.00759612	0.27618	0.286798	0.00186371	0.0012087	0.0558261	0.0107416	0.0154836	0.0496498	0.0135773	0.00215728	0.0175723	0.00144304	0.0377661	0.0084197	0.0096092
FCA_GND8125924_CGGAGCTGTGGGTCAA	0.0129484	0.00516986	0.0192221	0.0717971	0.00490793	0.0562868	0.00478317	0.0636472	0.226941	0.0014909	0.00130311	0.287581	0.0208756	0.020152	0.0400726	0.00972317	0.00350699	0.00872878	0.00143435	0.105586	0.00931192	0.0245304
FCA_GND8125924_CGGCTAGGTTAGAACA	0.00200786	0.00165224	0.00438703	0.117172	0.00336599	0.0757097	0.00458139	0.268508	0.380542	0.000988215	0.000934869	0.0381245	0.0192775	0.0060839	0.0155522	0.0206648	0.00239479	0.00581377	0.00101207	0.0210026	0.00306033	0.00716413
FCA_GND8125924_CGGTTAAAGGCTACGA	0.00186286	0.000680826	0.000989838	0.0322104	0.00106027	0.00821287	0.000936854	0.00239655	0.0203776	0.000820367	0.00026637	0.00187081	0.011766	0.00043744	0.00324104	0.905712	0.00164577	0.00150849	0.000293525	0.00126099	0.00146997	0.000979465
FCA_GND8125924_CGGTTAAGTGTGCCTG	0.0259033	0.177017	0.0749828	0.0179156	0.0103907	0.11485	0.00716408	0.037153	0.108743	0.00541726	0.00501649	0.126147	0.045303	0.0159426	0.101726	0.0188819	0.00793006	0.0205266	0.00784419	0.0545652	0.00755305	0.00902699
FCA_GND8125924_CGTAGGCTCCCTAACC	0.000144281	0.000168688	0.000108012	0.00753491	0.000348578	0.00504784	0.000266966	0.00192651	0.0235429	0.000206285	0.000116146	0.00012822	0.00620654	0.00010332	0.000383736	0.951231	0.000433222	0.000603406	0.000124069	0.000508601	0.000314855	0.000552384
FCA_GND8125924_CGTCAGGTCCGAATGT	0.000304956	0.000248025	9.91927e-05	0.00373092	0.000208729	0.000298558	0.000116523	0.00085703	0.0018075	0.000522112	4.00972e-05	0.000217296	0.00630664	0.000105991	0.000946284	0.98218	7.12443e-05	0.00042748	9.87254e-05	0.00126191	0.00010764	4.35021e-05
FCA_GND8125924_CGTGTAAGTTACGCGC	0.000861184	0.00043347	0.0173085	0.00568092	0.0017603	0.00698467	0.00112896	0.82025	0.0158637	0.000280898	0.000253416	0.0286293	0.00751135	0.0129183	0.0237752	0.00429727	0.000415458	0.0435259	0.000414429	0.00316869	0.000989072	0.00354916
FCA_GND8125924_CGTGTCTAGAAGATTC	0.00115524	0.0012237	0.00859154	0.0367522	0.00176347	0.0265897	0.0068175	0.166144	0.330205	0.000496267	0.000566268	0.348086	0.0167902	0.00734329	0.00904533	0.00524023	0.0011956	0.0132872	0.000477125	0.0142975	0.00207196	0.00186043
FCA_GND8125924_CGTGTCTAGGTGATTA	0.00535426	0.00226656	0.054507	0.0230759	0.00325271	0.0119026	0.0101929	0.228623	0.0492935	0.0005601	0.000406587	0.508467	0.00401778	0.0162867	0.0188794	0.0026568	0.00102411	0.0129384	0.000492129	0.0406576	0.00217049	0.00297464
FCA_GND8125924_CGTGTCTGTCTGGAGA	0.01093	0.00918846	0.0913432	0.0860672	0.00687856	0.0563348	0.00510281	0.0367243	0.14723	0.00256	0.00228275	0.318317	0.0190434	0.0543677	0.04045	0.00837112	0.00368931	0.00825062	0.00269439	0.0752329	0.00695183	0.00799035
FCA_GND8125924_CGTGTCTTCGAATGCT	5.59962e-05	5.55673e-05	4.73794e-05	0.0385945	0.000225125	0.012245	0.000378108	0.000417454	0.0374005	4.49021e-05	6.12579e-05	6.63441e-05	0.00153713	0.000338961	8.78539e-05	0.907212	0.000120873	0.000326224	3.6408e-05	0.000246438	0.000339372	0.000162983
FCA_GND8125924_CGTTCTGGTCAATGTC	0.0144358	0.00520723	0.0408137	0.0218258	0.00360708	0.0225991	0.00856911	0.0730168	0.0866094	0.00179916	0.00150005	0.374504	0.0107283	0.164839	0.0492712	0.00707892	0.00232556	0.022409	0.00199022	0.0724665	0.00578248	0.00862247
FCA_GND8125924_CTAATGGAGTGATCGG	0.00137192	0.00105514	0.0343936	0.019708	0.00320586	0.0164424	0.000897123	0.730319	0.0202811	0.000239476	0.000195852	0.127057	0.00296276	0.00771604	0.018459	0.0036604	0.000278811	0.00468495	0.000306674	0.00326374	0.0013397	0.00216161
FCA_GND8125924_CTACCCAAGGGTCGAT	0.00311724	0.00266385	0.048712	0.0168125	0.00430625	0.0297123	0.00253252	0.548521	0.0504318	0.0014084	0.00133351	0.113832	0.0102395	0.0483972	0.0151104	0.00652454	0.00237125	0.0422686	0.00200833	0.0328816	0.00374593	0.0130687
FCA_GND8125924_CTAGAGTCATACGCTA	0.00999037	0.00362812	0.00997981	0.0128135	0.00646157	0.00989819	0.0060673	0.00670674	0.0146253	0.00223884	0.00198378	0.0378406	0.00397152	0.00541179	0.00804077	0.00393419	0.00360729	0.00874397	0.00212347	0.0413702	0.451353	0.34921
FCA_GND8125924_CTAGAGTTCATGCAAC	2.00114e-05	4.37306e-06	7.79954e-05	8.24013e-05	0.000170222	0.00320456	3.79633e-05	0.986193	0.00623884	3.72681e-05	4.40847e-05	0.000864764	0.0013208	0.000139696	0.000237197	0.000147697	1.78398e-05	0.00098997	2.23085e-05	7.40462e-05	1.43683e-05	6.10711e-05
FCA_GND8125924_CTAGCCTAGGACACCA	0.000333571	0.000193632	0.000194895	0.332873	0.000460478	0.00206526	0.010708	0.00200018	0.0113464	0.000107197	0.000108135	0.00015026	0.0808748	0.000124526	0.00014043	0.549115	0.000323411	0.000504703	6.2375e-05	0.00727569	0.000866593	0.00017201
FCA_GND8125924_CTCAGAAAGCGCTCCA	0.00190194	0.00173216	0.00369229	0.100636	0.00483719	0.156621	0.0127042	0.115413	0.4466	0.00107401	0.000739613	0.0321255	0.00969403	0.00495547	0.0113842	0.0121699	0.00259827	0.00965306	0.00068252	0.057329	0.00268021	0.0107763
FCA_GND8125924_CTCAGAACAACTGCGC	1.60159e-05	3.7622e-05	1.29288e-05	0.0104629	3.21317e-05	0.000169175	6.28425e-05	3.63394e-05	0.00111205	7.30749e-05	2.69789e-05	9.14249e-06	0.00243955	8.67837e-06	3.93583e-05	0.985268	4.44113e-05	6.18196e-05	3.46041e-05	3.32671e-05	1.17869e-05	6.90798e-06
FCA_GND8125924_CTCATTACACCAGATT	0.00501733	0.00221095	0.00198908	0.319946	0.00392544	0.0102895	0.00558346	0.00782687	0.0388524	0.00283359	0.00178476	0.00309353	0.0910428	0.00233594	0.00450435	0.475757	0.00178486	0.00331737	0.00204134	0.00776427	0.00409011	0.0040088
FCA_GND8125924_CTCCTAGTCCACGCAG	0.000579952	0.00103617	0.00364472	0.0307184	0.00135978	0.0740073	0.00134382	0.00436819	0.00851015	0.000629289	0.00058467	0.00281992	0.00543466	0.00329432	0.00262303	0.852394	0.000729312	0.00277113	0.000583125	0.00135163	0.000580322	0.000635899
FCA_GND8125924_CTCGTACCACGGACAA	5.31722e-05	0.000117831	0.000111867	0.0193939	6.48099e-05	0.0030643	3.98114e-05	0.000333751	0.00304751	4.44212e-05	3.17995e-05	0.000118794	0.00379875	0.000109586	0.000191301	0.968878	3.64775e-05	0.000198185	2.42331e-05	0.000289895	2.24699e-05	2.93785e-05
FCA_GND8125924_CTCTAATCACGCGAAA	0.000934147	0.00242545	0.00321624	0.00186044	0.0373124	0.0120059	0.00192308	0.693558	0.131366	0.000709749	0.0015353	0.0670601	0.00575922	0.00768134	0.002077	0.00760727	0.00153553	0.0156348	0.000742044	0.00162562	0.00117943	0.00225091
FCA_GND8125924_CTCTGGTAGGCCCGTT	0.00631593	0.00253557	0.0217084	0.0406551	0.00449892	0.0714741	0.00514535	0.0696648	0.416033	0.000927798	0.000713503	0.222877	0.00567221	0.0109548	0.0206172	0.0102573	0.00224767	0.0150077	0.000785436	0.0576789	0.00467831	0.00955102
FCA_GND8125924_CTCTGGTAGTCCCACG	8.27673e-05	3.07603e-05	3.15267e-05	0.0651198	6.21637e-05	0.00219194	2.4255e-05	0.000130934	0.00244177	4.48019e-05	4.30117e-05	2.12397e-05	0.00339711	2.79892e-05	0.000154597	0.925524	1.72775e-05	0.000114604	4.78182e-05	0.000443357	3.42715e-05	1.41819e-05
FCA_GND8125924_CTGATAGTCTCCAACC	0.000160244	0.000120464	0.000227221	0.000582246	0.000148313	0.000715837	0.000100788	0.00100419	0.00279258	0.000120521	4.9259e-05	0.000264277	0.00685325	0.000171222	0.000578232	0.98406	0.000294688	0.000582146	9.60371e-05	0.000698711	0.000157595	0.000222582
FCA_GND8125924_CTGCCTACAAGTTAAG	0.003249	0.00252093	0.0150075	0.0142197	0.00639532	0.00921653	0.0118838	0.583547	0.106146	0.000935972	0.000967491	0.10098	0.0301631	0.0298532	0.0429347	0.0112636	0.00122318	0.0185418	0.00111052	0.0051286	0.00172051	0.00299059
FCA_GND8125924_CTGGTCTCAATGGATA	0.00327104	0.00138873	0.00620188	0.0131143	0.00518831	0.00387263	0.00786101	0.010794	0.0197215	0.00102871	0.000854614	0.00791017	0.840721	0.00817104	0.00326128	0.0365081	0.00486103	0.00981243	0.000893821	0.0114295	0.00149055	0.00164391
FCA_GND8125924_CTGGTCTGTCAAAGAT	0.00375564	0.00100082	0.0397504	0.00840767	0.00155027	0.00567647	0.00101608	0.203662	0.0109747	0.000464975	0.000458299	0.0801528	0.00785037	0.554944	0.0455962	0.00130886	0.000673891	0.0137457	0.000667551	0.0159722	0.000900333	0.00147097
FCA_GND8125924_CTGTGCTGTGCATCTA	0.00632538	0.00145009	0.0799364	0.0397968	0.00441664	0.0397959	0.00347449	0.0941466	0.120965	0.000581641	0.000511541	0.435729	0.0074704	0.0239142	0.0660122	0.00465405	0.00102474	0.0115197	0.000684136	0.0434449	0.00589616	0.00824983
FCA_GND8125924_CTTAGGATCAGTACGT	0.000787596	0.00103777	0.000900461	0.00394302	0.000816366	0.838932	0.00354492	0.000909546	0.0305489	0.000905021	0.000629961	0.00275948	0.00143971	0.00109741	0.0289178	0.00256124	0.0192643	0.00157987	0.000598933	0.00137235	0.0552071	0.00224622
FCA_GND8125924_CTTCTCTGTGCGAAAC	0.00403296	0.00402625	0.245651	0.0238424	0.0102597	0.0201295	0.00608264	0.0389345	0.0149596	0.000967892	0.000739551	0.5687	0.00576753	0.0205055	0.00686327	0.00183937	0.00105211	0.0104498	0.00130097	0.00573136	0.00608513	0.00207912
FCA_GND8125924_GAAACTCTCGAATGGG	0.00123842	0.000696998	0.000772207	0.15145	0.0012301	0.00140174	0.00490387	0.00230183	0.00215852	0.000502801	0.000477325	0.000883479	0.0579948	0.000768779	0.00112664	0.765586	0.000703511	0.00144751	0.000497835	0.00212729	0.000922	0.00080817
FCA_GND8125924_GAAATGACAAACTGCT	0.00501643	0.00257784	0.0354767	0.0129686	0.00297598	0.0796553	0.00116567	0.471414	0.0843317	0.000800133	0.000785636	0.208133	0.0102827	0.0358956	0.0178023	0.00585799	0.0011912	0.00774262	0.0016788	0.00892786	0.00212737	0.00319194
FCA_GND8125924_GAACGGATCTTGCAAG	0.00131801	0.00116821	0.00396206	0.0291146	0.0021407	0.0779312	0.000920394	0.0920873	0.695169	0.000622972	0.000534458	0.0488628	0.0111355	0.00227545	0.00145673	0.0122108	0.00097366	0.00434167	0.000689994	0.0108692	0.000946929	0.00126836
FCA_GND8125924_GAAGCAGTCGGTGTTA	0.000505367	0.000350721	0.000677762	0.00761303	0.000428802	0.002061	0.000402552	0.00204294	0.00781472	0.00010806	7.17234e-05	0.00110202	0.0291224	0.000240726	0.000773525	0.939766	0.000159205	0.00100418	8.60642e-05	0.00529208	0.000211639	0.000165236
FCA_GND8125924_GAATAAGCATTACGAC	0.140109	0.00733259	0.0314983	0.0135538	0.00887179	0.0184629	0.00854046	0.0225497	0.0113876	0.00643712	0.00578752	0.0240146	0.0127205	0.0167908	0.0150469	0.0092897	0.0100929	0.0142391	0.0118933	0.324912	0.0534412	0.233029
FCA_GND8125924_GACACGCCACGCCAGT	0.0164173	0.0116802	0.0169181	0.0583204	0.16756	0.022346	0.019041	0.0347919	0.0264257	0.00767953	0.00677782	0.0240736	0.135257	0.0118496	0.0154241	0.16561	0.0101453	0.198527	0.00773232	0.0193525	0.0134752	0.0105967
FCA_GND8125924_GACCAATCAAGCCCAC	0.00160643	0.0020142	0.0194148	0.0229352	0.00861672	0.0126032	0.00488271	0.360936	0.0476931	0.000366803	0.000227383	0.466295	0.00129893	0.0072051	0.0045967	0.0018575	0.000838505	0.0255004	0.000262369	0.00735984	0.00236645	0.00112235
FCA_GND8125924_GACCTGGAGTCAAGCG	0.00394924	0.000808898	0.00520961	0.00238731	0.00141627	0.00476728	0.00130605	0.778509	0.0199477	0.000583454	0.000471894	0.0802184	0.00726012	0.0188436	0.00171257	0.0011308	0.00143867	0.0428472	0.000834488	0.0240344	0.000764505	0.00155867
FCA_GND8125924_GACGCGTGTCGGCATC	0.00468554	0.00121415	0.243178	0.0207374	0.00344646	0.0259692	0.000906343	0.0244138	0.0463867	0.000275781	0.000211315	0.547782	0.00404093	0.0190422	0.0302913	0.00139415	0.000383466	0.0079955	0.000325271	0.0126974	0.00304091	0.00158252
FCA_GND8125924_GACGTGCAGACAGACC	0.000643729	0.00128552	0.0021125	0.0293896	0.00134164	0.0695827	0.000783384	0.0113356	0.776747	0.000468456	0.000659927	0.00341514	0.00533127	0.00114026	0.0273209	0.0127953	0.000550171	0.00123913	0.000863243	0.0462366	0.000740839	0.00601736
FCA_GND8125924_GACGTGCGTCTCCATC	6.81845e-05	5.71632e-05	0.00025348	0.0359095	8.48427e-05	0.00939081	0.000544979	0.000451666	0.000808253	0.000311811	9.6348e-05	5.08072e-05	0.00105445	0.000145377	8.25032e-05	0.949651	0.000311776	0.000198623	3.54583e-05	0.000119348	0.000298074	7.52304e-05
FCA_GND8125924_GACGTTAAGGAACTGC	0.00274628	0.00241528	0.0331565	0.0214085	0.00382361	0.0285779	0.00965048	0.155554	0.327073	0.000886109	0.000661985	0.322341	0.00262491	0.00810576	0.0111721	0.00728582	0.00141045	0.00944465	0.000784208	0.0454521	0.00203168	0.00339305
FCA_GND8125924_GACTAACGTGTGTGCC	0.0163226	0.0131135	0.0580509	0.0681721	0.0109687	0.0947226	0.00747596	0.160038	0.193797	0.00477143	0.00346855	0.179651	0.0377146	0.0637167	0.0162658	0.00892401	0.00578445	0.0191986	0.00440352	0.0195367	0.00772173	0.00618172
FCA_GND8125924_GACTACAGTCAGATAA	0.00557618	0.00136402	0.0550949	0.0573576	0.0052964	0.0735863	0.00373222	0.0383586	0.179592	0.000800432	0.000862018	0.355807	0.0122653	0.025861	0.0987029	0.0103522	0.00150475	0.00966673	0.00111843	0.0442753	0.00679116	0.0120345
FCA_GND8125924_GACTGCGGTATATGGA	0.00025655	0.000285211	0.00414172	0.0010406	0.000383922	0.00289661	0.000231641	0.926816	0.00423451	9.83798e-05	5.57033e-05	0.010309	0.000622072	0.00274955	0.000562724	0.000512948	0.000193926	0.0356136	0.000190999	0.00527297	0.000605938	0.00292564
FCA_GND8125924_GAGGTGAGTAAACCTC	0.000453163	9.58539e-05	0.000161982	0.00424377	9.52802e-05	0.000402248	6.21786e-05	0.000491457	0.00158947	7.19264e-05	6.01094e-05	0.00020176	0.0490108	0.000162139	0.000195902	0.942241	3.6532e-05	0.000174279	8.69277e-05	8.10229e-05	4.13044e-05	4.10271e-05
FCA_GND8125924_GATGAAAGTCATTAGC	0.0374064	0.0107455	0.0828956	0.0485656	0.0466252	0.0302077	0.0106409	0.156363	0.15407	0.00519035	0.00425744	0.251419	0.0238581	0.0319787	0.0149853	0.0149823	0.00596673	0.0320965	0.00537603	0.0181563	0.00682069	0.00739253
FCA_GND8125924_GATTCAGCAGTCAGAG	6.20802e-05	9.57175e-05	4.94548e-05	0.0270533	0.000221088	0.00119349	0.000390678	0.000223248	0.000379551	0.000137022	5.16893e-05	2.48031e-05	0.0105536	5.05204e-05	9.89959e-05	0.958231	0.000150666	0.00029058	3.17472e-05	0.000604046	7.76778e-05	2.86795e-05
FCA_GND8125924_GATTCAGTCTGCCCTA	0.00044048	0.000342809	0.00170779	0.00986818	0.0014622	0.0379129	0.000284591	0.292024	0.484486	0.000270237	0.000579275	0.128343	0.0210966	0.0038969	0.00286085	0.00370777	0.000383375	0.00144609	0.000241927	0.00635956	0.000330009	0.00195626
FCA_GND8125924_GCAGTTACAGTATCTG	0.00278772	0.00131215	0.0268818	0.00857667	0.00145357	0.0138716	0.00317807	0.427276	0.107643	0.000498244	0.000412792	0.31967	0.00927992	0.0183624	0.022051	0.00124291	0.000779562	0.0126862	0.000478978	0.0181383	0.00189056	0.00152806
FCA_GND8125924_GCATGATGTGATGCCC	0.00170918	0.0014796	0.0958323	0.0113877	0.0029508	0.0217829	0.00241251	0.182091	0.0337873	0.000635557	0.000441596	0.538076	0.00735051	0.0504387	0.0147521	0.00231997	0.000939863	0.0234311	0.000672339	0.00470034	0.00144434	0.00136413
FCA_GND8125924_GCCAAATAGAGTGAGA	3.20343e-05	2.02497e-05	3.54487e-05	0.00977225	1.44606e-05	0.000247213	1.2566e-05	0.000123329	0.0010476	2.23699e-05	2.34261e-05	2.7264e-05	0.00294357	1.40596e-05	0.000119745	0.98531	1.63259e-05	5.64646e-05	1.35328e-05	0.000124974	1.38122e-05	8.96671e-06
FCA_GND8125924_GCCAAATCACCGAAAG	0.001194	0.000697602	0.00736884	0.0154757	0.00237342	0.0252138	0.000950006	0.340783	0.045682	0.000610049	0.00117421	0.527618	0.00230079	0.0102073	0.00154906	0.0021576	0.000958456	0.00819129	0.000701353	0.00281201	0.00101359	0.000968553
FCA_GND8125924_GCCAAATGTTTGTGTG	0.00382004	0.00154563	0.0129622	0.00531375	0.00306683	0.0444013	0.00112673	0.739404	0.0350622	0.000620797	0.000602002	0.0431765	0.00647637	0.0486051	0.0131841	0.00569986	0.000975821	0.0189193	0.00120931	0.00390165	0.00327681	0.00664974
FCA_GND8125924_GCGAGAAAGTGAATTG	0.00010986	0.000176615	0.0103897	0.00163139	0.000466569	0.00449941	3.11829e-05	0.935892	0.00354744	6.68994e-05	4.282e-05	0.0221827	0.000448245	0.00204478	0.000399909	0.000289788	6.88817e-05	0.0154695	7.96425e-05	0.00139706	0.000177359	0.000588081
FCA_GND8125924_GCGAGAAGTACAGTTC	0.00456403	0.00574253	0.0036496	0.126126	0.00300446	0.00386973	0.0173488	0.0069713	0.00960431	0.001232	0.00107701	0.00362121	0.408989	0.00240875	0.0108859	0.365995	0.00151215	0.00366202	0.00130137	0.013569	0.00289878	0.00196731
FCA_GND8125924_GCGCAACAGTTTGCGT	0.0111033	0.0067437	0.0260558	0.135492	0.00934824	0.0335073	0.0025085	0.0809198	0.161174	0.00147605	0.00143751	0.380561	0.0185205	0.0183984	0.0278566	0.00759249	0.00166311	0.00590996	0.00136357	0.0588228	0.00308304	0.00646162
FCA_GND8125924_GCGCAGTGTTCGGCAC	0.00313953	0.00179878	0.0490485	0.00848936	0.00725631	0.0472426	0.00187623	0.320168	0.0387424	0.00144952	0.00148718	0.309792	0.00678182	0.148134	0.00416442	0.00396227	0.00224057	0.00612261	0.00224227	0.0270701	0.00224347	0.00654722
FCA_GND8125924_GCGCGATTCTATCCCG	0.00221648	0.0051527	0.0225367	0.0111845	0.00388231	0.0316964	0.00278993	0.163362	0.0959584	0.00135898	0.00124861	0.338032	0.0145114	0.239409	0.0377462	0.0080653	0.00140493	0.010202	0.00129644	0.00416212	0.00187834	0.00190465
FCA_GND8125924_GCTCCTACAGTAAGAT	0.00122353	0.000916018	0.0040688	0.0238866	0.00213953	0.0211646	0.0023276	0.632625	0.160286	0.000396825	0.000319019	0.0827216	0.00878927	0.00714938	0.0159048	0.00586166	0.000576791	0.00664586	0.000275445	0.0144765	0.00158383	0.00666145
FCA_GND8125924_GCTCTGTGTCTGCGGT	4.59491e-05	9.61595e-05	1.87849e-05	0.00358616	7.16495e-05	0.000667852	4.00717e-05	0.000264492	0.00428886	0.00013863	9.85357e-05	6.80067e-05	0.000756117	2.527e-05	0.000101752	0.98887	0.000387087	0.000176961	2.78503e-05	0.000139101	7.96639e-05	5.14367e-05
FCA_GND8125924_GCTGCTTGTCTAAAGA	0.00402379	0.00257177	0.0303584	0.0210718	0.00485087	0.0144574	0.0119641	0.441775	0.119885	0.000825629	0.000737953	0.208071	0.0141838	0.0304029	0.0525334	0.0069137	0.00120658	0.0148947	0.000887256	0.012404	0.00202521	0.00395616
FCA_GND8125924_GCTGGGTAGTATCTCG	0.000195599	0.000243754	5.27822e-05	0.146159	0.000127895	0.000567767	0.831968	0.00022597	0.000600927	0.000193788	7.33007e-05	7.90687e-05	0.000959468	8.70426e-05	0.000156679	0.0172165	0.000136297	0.000120144	9.77988e-05	0.000401084	0.000260656	7.63366e-05
FCA_GND8125924_GCTGGGTTCTGACCTC	0.000752548	0.000263082	0.000194516	0.00290301	0.00038387	0.0172434	0.000831595	0.00182295	0.863355	0.000217087	0.000115422	0.000325611	0.0116608	0.000169231	0.0015537	0.0931758	0.0003111	0.000361674	0.000163314	0.0020091	0.000359063	0.00182853
FCA_GND8125924_GCTTCCACAGTCAGAG	0.00420088	0.00374198	0.0131224	0.0149412	0.00596774	0.0335407	0.00830828	0.0273623	0.0333924	0.00387075	0.00195115	0.243121	0.0973317	0.441015	0.0143674	0.0100647	0.00269382	0.0252997	0.00215836	0.00731214	0.00360482	0.0026318
FCA_GND8125924_GCTTCCAGTGACGGTA	0.00277899	0.00224043	0.0204205	0.0226941	0.00300231	0.0501491	0.00294929	0.54397	0.107706	0.00119056	0.00119222	0.0638879	0.0165436	0.0621358	0.0403202	0.0217247	0.00193198	0.0113374	0.00218595	0.0116235	0.00299792	0.00701697
FCA_GND8125924_GGAATAAGTCGGGTCT	0.0045778	0.0014253	0.101539	0.0224984	0.0023827	0.0285186	0.00460877	0.102846	0.0368003	0.000663356	0.000554817	0.558975	0.00444613	0.0544935	0.0289613	0.0050399	0.00136515	0.013202	0.000849583	0.0198024	0.00272869	0.00372129
FCA_GND8125924_GGACAGATCTTAGAGC	4.69642e-05	6.71889e-05	3.23657e-05	0.000849608	4.03471e-05	0.000670937	3.61843e-05	0.000245477	0.00267828	0.000412909	5.2414e-05	0.00016769	0.00080587	4.48169e-05	0.00019935	0.993062	7.81568e-05	0.000130827	2.43919e-05	0.000201487	0.000104026	4.82294e-05
FCA_GND8125924_GGACATTGTGCTTCTC	0.0046154	0.00377708	0.0391363	0.0481825	0.00340235	0.108011	0.00167882	0.0541678	0.175399	0.0013495	0.00130796	0.366092	0.00845842	0.00983337	0.0925592	0.00516177	0.00193791	0.0054212	0.00137929	0.0498213	0.00382341	0.0144846
FCA_GND8125924_GGACATTTCCATGCTC	0.00545078	0.00507768	0.0880793	0.00413115	0.00441272	0.0201095	0.002092	0.085825	0.350948	0.00148294	0.000886581	0.363474	0.0129539	0.0169409	0.00584786	0.00328801	0.00123126	0.0129501	0.00379432	0.00744528	0.00200668	0.00157271
FCA_GND8125924_GGCAATTTCCTTAATC	2.70178e-05	1.68868e-05	4.9567e-05	0.00765183	2.38978e-05	0.000108397	1.36709e-05	0.000175869	0.00325205	4.52427e-05	2.22965e-05	0.000122525	0.0030337	7.16051e-05	0.000130712	0.985072	1.54061e-05	0.000117014	7.37569e-06	2.68996e-05	9.76941e-06	6.71229e-06
FCA_GND8125924_GGCCGATTCCGTCAAA	0.00696433	0.00274733	0.0221555	0.0504404	0.0155553	0.0137782	0.00493741	0.227074	0.162736	0.00140066	0.0026798	0.370699	0.00965862	0.026466	0.0215894	0.0089943	0.00168803	0.0135089	0.00166468	0.0276296	0.00403041	0.00360228
FCA_GND8125924_GGCGACTTCAGTTAGC	6.55218e-05	8.04285e-05	6.4585e-05	0.0179997	8.51394e-05	0.000929953	8.96323e-05	0.000195643	0.00237245	0.000102482	5.41397e-05	7.51061e-05	0.0888399	5.2606e-05	0.00012641	0.888328	9.28741e-05	0.000196412	3.13532e-05	0.000125002	3.65094e-05	5.61278e-05
FCA_GND8125924_GGCGTGTAGAAGATTC	0.00916176	0.00326988	0.00808327	0.0267439	0.00798634	0.040944	0.00355491	0.0800922	0.165718	0.00302234	0.00355349	0.556898	0.0127127	0.0228435	0.00650204	0.0105606	0.00473803	0.00541757	0.00345515	0.00965393	0.00465962	0.0104294
FCA_GND8125924_GGCTCGATCTGCCCTA	0.0410464	0.0079143	0.034649	0.0128552	0.00797626	0.0259534	0.00793382	0.0160527	0.0286853	0.00634649	0.00493451	0.0766973	0.0114364	0.0139419	0.023293	0.0080276	0.00607665	0.0106748	0.0163442	0.444379	0.0757466	0.119035
FCA_GND8125924_GGCTGGTAGAGGTTGC	0.0027103	0.00283723	0.00354878	0.148132	0.00439693	0.0632265	0.00991861	0.00611877	0.19591	0.00210721	0.00165205	0.00370133	0.0157924	0.00319317	0.00358151	0.51117	0.00203498	0.0034711	0.00178121	0.00759133	0.003696	0.00342829
FCA_GND8125924_GGGAGATTCCCACTTG	0.00210682	0.00294364	0.0107909	0.00222093	0.0084511	0.020378	0.00236663	0.420591	0.300955	0.00101401	0.00098415	0.161497	0.0166224	0.0155542	0.00856506	0.00751047	0.00125781	0.00549925	0.000871334	0.00556628	0.00143478	0.00282036
FCA_GND8125924_GGGATGACAGATTGCT	0.00284498	0.00216765	0.0139711	0.0331137	0.0297142	0.0133581	0.0422256	0.531172	0.0747045	0.000860059	0.000658523	0.189915	0.00209292	0.0137092	0.00565622	0.00376956	0.00138977	0.0305119	0.000567609	0.004588	0.00182946	0.00118007
FCA_GND8125924_GGGATGAGTTTGCATG	0.000986884	0.000649385	0.00887251	0.00534316	0.00157175	0.00651607	0.000957316	0.434065	0.0167795	0.000269223	0.000142573	0.442287	0.00399401	0.0252254	0.00594128	0.00121614	0.000299185	0.0386836	0.000202379	0.00414317	0.00104492	0.000809321
FCA_GND8125924_GGGCATCTCCGCGCAA	0.00300437	0.00190109	0.00562702	0.0473231	0.00759935	0.0349295	0.00458039	0.244077	0.502982	0.00106004	0.00109626	0.0191766	0.0141058	0.00346668	0.0589986	0.00968185	0.00134426	0.00540329	0.00145495	0.0110169	0.00668251	0.0144885
FCA_GND8125924_GGTATTGGTCAGTGGA	1.57325e-05	1.32319e-05	4.38813e-06	0.0263885	1.94324e-05	0.000129178	4.08482e-05	1.97803e-05	0.000210103	3.98732e-05	2.49657e-05	4.20154e-06	0.00414794	6.86532e-06	1.03082e-05	0.968768	4.01093e-05	3.12553e-05	7.7974e-06	6.11541e-05	1.25519e-05	3.36958e-06
FCA_GND8125924_GGTGCGTCAGTATCTG	4.21009e-05	1.84179e-05	6.94493e-06	0.00676942	2.58297e-05	4.88182e-05	2.92108e-05	3.83851e-05	0.000691709	3.25821e-05	2.73169e-05	1.00814e-05	0.00415605	7.58549e-06	4.38519e-05	0.987882	2.80413e-05	5.29023e-05	1.36248e-05	5.22783e-05	1.81856e-05	4.55936e-06
FCA_GND8125924_GTAACGTTCTGTTGAG	0.000255671	0.000837078	0.000864753	0.00835334	0.00297884	0.00868118	0.00573242	0.761126	0.0863289	0.000389818	0.000681067	0.0817576	0.0129524	0.00542438	0.00184457	0.0126118	0.000503742	0.00611456	0.000196925	0.00137911	0.00049529	0.000490819
FCA_GND8125924_GTACTCCAGACATAAC	0.00237482	0.00204145	0.00635887	0.139288	0.00527313	0.0179533	0.0141324	0.525807	0.133287	0.00090827	0.000937406	0.0375592	0.00825454	0.00834101	0.0121191	0.0138563	0.0011551	0.0125436	0.00141176	0.0435904	0.00483193	0.00797617
FCA_GND8125924_GTACTCCAGATGGGTC	0.00270173	0.00116726	0.0146041	0.010447	0.00336369	0.0111681	0.00171459	0.149198	0.0244385	0.000410595	0.000211832	0.700222	0.00317086	0.019451	0.0054438	0.0014002	0.000605042	0.0383618	0.000271716	0.00821962	0.00232442	0.00110464
FCA_GND8125924_GTACTCCTCTGAAAGA	0.000250153	5.51473e-05	9.12643e-05	0.016753	0.000146778	0.000621343	0.000254698	0.000542262	0.00533936	5.1157e-05	5.35887e-05	0.000130609	0.0596995	0.000133051	0.000543947	0.913986	0.000123872	0.000369889	8.10892e-05	0.00048272	0.000129033	0.000161729
FCA_GND8125924_GTACTTTAGCACACAG	0.0021401	0.00068357	0.00404383	0.0178465	0.00935953	0.0992244	0.00107894	0.666112	0.0818796	0.000563666	0.000525356	0.0654207	0.00548364	0.00575758	0.00216563	0.00833241	0.00223793	0.0148108	0.000687058	0.00636083	0.00124216	0.00404336
FCA_GND8125924_GTCATTTCACTTCGAA	3.68115e-05	1.68217e-05	1.70204e-05	0.0918038	1.81491e-05	0.000375266	0.000143292	0.000114754	0.00105931	1.92096e-05	3.28428e-05	1.12889e-05	0.00609809	1.49903e-05	6.77037e-05	0.899628	3.33963e-05	5.57428e-05	4.68035e-05	0.000372296	1.34128e-05	2.10689e-05
FCA_GND8125924_GTCCTCACACGGTAAG	0.00653062	0.00418352	0.0198043	0.141106	0.00958529	0.0630414	0.0070824	0.118583	0.302071	0.000961202	0.000724815	0.172795	0.0219577	0.0126879	0.0224656	0.0109935	0.00206199	0.0200499	0.000818916	0.0448171	0.00986978	0.00780953
FCA_GND8125924_GTCGGGTCAAATTGCC	0.00171466	0.00213212	0.00341224	0.0298237	0.00311273	0.468158	0.025717	0.0184521	0.325879	0.002194	0.00121601	0.0363185	0.00266243	0.00646006	0.0104265	0.00966646	0.0138701	0.0202594	0.000995429	0.00923552	0.0035279	0.00476575
FCA_GND8125924_GTCTCGTAGATACACA	0.00384434	0.00109577	0.00276146	0.0858801	0.00115108	0.00252637	0.00289193	0.00320631	0.00356992	0.000721096	0.00059371	0.00191208	0.0271617	0.00213981	0.00412332	0.848693	0.00075507	0.00152492	0.000605673	0.00295758	0.0010592	0.000825056
FCA_GND8125924_GTCTCGTTCGCTGATA	1.54695e-05	3.59939e-05	1.48403e-05	0.00616014	2.97554e-05	0.00024233	1.20917e-05	2.76068e-05	0.000485855	3.06313e-05	3.31726e-05	2.61705e-05	0.000750342	1.453e-05	2.64614e-05	0.991933	2.97022e-05	5.97586e-05	2.54748e-05	3.1643e-05	8.91159e-06	6.58435e-06
FCA_GND8125924_GTCTTCGGTGTAATGA	0.00333569	0.00358375	0.00627916	0.170471	0.011635	0.0685138	0.00551937	0.09036	0.383534	0.000865021	0.00078157	0.169492	0.0120482	0.00471394	0.00580916	0.00808124	0.00314669	0.0175026	0.00069617	0.0198931	0.00961632	0.00412247
FCA_GND8125924_GTGCAGCAGAGAACAG	0.00214507	0.00167887	0.010741	0.0124312	0.00465803	0.0268868	0.0102879	0.448369	0.173061	0.000921607	0.000646475	0.214622	0.00873412	0.0278859	0.0291707	0.00474982	0.00103823	0.0117621	0.000872237	0.00444584	0.00279427	0.00209811
FCA_GND8125924_GTGCGGTGTAGCTAAA	0.002485	0.00172842	0.00884842	0.00224225	0.00447548	0.0155032	0.00127481	0.165448	0.0693837	0.000701523	0.000695211	0.608628	0.0126176	0.0737774	0.0134068	0.00183687	0.000949837	0.00734025	0.00099628	0.00531983	0.00101551	0.00132546
FCA_GND8125924_GTGCTTCTCAGCCTAA	0.0014516	0.000948214	0.00451742	0.0240812	0.00432497	0.0414793	0.000782365	0.393601	0.417349	0.000571236	0.000627122	0.0664761	0.0143934	0.00464803	0.00362843	0.00724857	0.000808233	0.00484668	0.00140229	0.00512771	0.000721648	0.000964759
FCA_GND8125924_GTGGGTCCAATAGAGT	0.00244591	0.00258399	0.0250417	0.0112219	0.00961722	0.0196131	0.0140467	0.428084	0.189187	0.000977917	0.000779578	0.187678	0.0252303	0.0211361	0.0146247	0.00968059	0.00226938	0.0217042	0.00089144	0.00827688	0.00174255	0.00316607
FCA_GND8125924_GTGTGCGTCACTTACT	0.00462739	0.567934	0.00801521	0.0255161	0.00698663	0.0634112	0.00455988	0.0186082	0.12487	0.00311252	0.00358937	0.0447857	0.023595	0.00582757	0.0270125	0.0153499	0.00541198	0.00635883	0.00358475	0.0267522	0.00522725	0.00486391
FCA_GND8125924_GTGTTAGCAGTACACT	0.0373526	0.000306465	0.000128772	0.000319569	5.75319e-05	0.000428548	3.61458e-05	0.000251906	0.000555098	3.60477e-05	9.2658e-05	0.000244083	0.000110645	0.000124695	8.27137e-05	3.95617e-05	0.000171249	8.40492e-05	7.84844e-05	0.943889	0.00224391	0.0133664
FCA_GND8125924_GTTACAGGTAAACCTC	0.000141798	0.000249834	0.000450554	0.00545614	7.18421e-05	0.00146534	6.6152e-05	0.000584117	0.00222164	6.60703e-05	4.14236e-05	0.000500468	0.00641515	0.000141295	0.00044475	0.979288	4.39372e-05	0.000258693	3.75644e-05	0.0019346	6.86097e-05	5.23228e-05
FCA_GND8125924_GTTACAGTCAGGCAAG	0.00940159	0.00566418	0.0504884	0.0308755	0.00660214	0.0396795	0.0253353	0.172921	0.117543	0.00259445	0.00227082	0.274333	0.0330914	0.0537978	0.0519899	0.0137196	0.00440353	0.0188322	0.00291826	0.0685169	0.0046726	0.0103487
FCA_GND8125924_GTTCATTCAGACAGGT	0.324899	0.00287419	0.00854546	0.00544394	0.00284051	0.00670936	0.00269066	0.00679113	0.00425085	0.002018	0.00194043	0.014892	0.00409069	0.00766847	0.00631353	0.00294848	0.00243045	0.00401238	0.0162591	0.302983	0.0891517	0.180247
FCA_GND8125924_GTTCGGGCAGACGCCT	0.00348606	0.00138322	0.0313412	0.0267182	0.00188936	0.0197151	0.00440584	0.425952	0.0854978	0.000414439	0.000312255	0.306707	0.00663523	0.0140056	0.0189546	0.00165618	0.000753318	0.014387	0.000371416	0.0311753	0.00211447	0.00212409
FCA_GND8125924_GTTCTCGCAAGGCTCC	0.807795	0.000177084	0.000427186	0.000613183	0.000146649	0.000563145	0.000189002	0.00062156	0.00014323	0.000116453	9.09735e-05	0.0194804	0.000266008	0.000650375	0.000229966	0.000198858	0.000124601	0.000538377	0.000134755	0.162536	0.00397519	0.00098216
FCA_GND8125924_GTTCTCGCATGGTCTA	6.53228e-05	6.62508e-05	4.01178e-05	0.0889297	5.6694e-05	0.00365442	0.000276662	0.000322856	0.00758335	3.53643e-05	6.86509e-05	7.24194e-05	0.00035263	0.000118984	7.37661e-05	0.897289	5.23872e-05	8.65947e-05	7.25211e-05	0.000661786	7.21272e-05	4.87012e-05
FCA_GND8125924_GTTTCTACACTTGGAT	0.000842925	0.000905207	0.00697884	0.0109962	0.00850916	0.0324644	0.0333049	0.740872	0.0690059	0.00068938	0.000604084	0.0250938	0.0145704	0.0114815	0.010987	0.0100466	0.0023225	0.0128702	0.00061167	0.00306113	0.00105829	0.00272417
FCA_GND8125924_TAAGCGTAGTGAAGTT	0.000115206	4.50466e-05	5.87724e-05	0.0296626	6.0163e-05	0.00199162	0.000100834	0.00046291	0.00510095	8.76402e-05	6.93437e-05	5.51675e-05	0.00618479	5.97671e-05	0.000127465	0.954565	0.00020305	0.00025541	2.33797e-05	0.000468883	0.000211122	9.07632e-05
FCA_GND8125924_TAAGTGCAGTAAGTAC	0.000204963	0.000266171	0.000212741	0.210314	0.000686439	0.00221164	0.727221	0.000937477	0.00427754	0.000608918	0.00017046	0.000255084	0.00180461	0.000252033	0.00039763	0.0481865	0.000325496	0.000346271	0.00017994	0.000520301	0.000371195	0.000249842
FCA_GND8125924_TACCTATTCCCTGACT	4.58342e-05	5.90204e-05	8.53582e-05	0.0256278	4.71625e-05	0.000384771	4.71361e-05	0.0003004	0.00466569	7.13507e-05	3.55625e-05	0.000186741	0.0110893	0.000100704	0.000267774	0.956592	3.09486e-05	0.000173456	2.4546e-05	0.000122933	2.00669e-05	2.14828e-05
FCA_GND8125924_TACTCGCAGAGATGAG	0.00217142	0.00124319	0.248561	0.0110532	0.00171829	0.0672218	0.00121497	0.0836651	0.0414408	0.00101063	0.000843399	0.208864	0.00577358	0.284366	0.0162771	0.00352263	0.00119797	0.00541265	0.0018192	0.00772121	0.00149913	0.0034025
FCA_GND8125924_TACTCGCTCTGATACG	0.0125768	0.00295557	0.111571	0.0443088	0.00539944	0.0329509	0.00532636	0.0541286	0.117054	0.000909409	0.000718761	0.458413	0.00763577	0.0196847	0.0535982	0.00503635	0.00117626	0.0161858	0.00092556	0.040825	0.00310235	0.00551726
FCA_GND8125924_TACTTACCAGTCCTTC	0.000571098	0.000787055	0.00427377	0.0152682	0.00183173	0.0187894	0.0010034	0.834035	0.0596276	0.000430833	0.000460524	0.0121621	0.00539165	0.004292	0.0238834	0.00305184	0.000448598	0.00728732	0.000510476	0.00308779	0.000635524	0.00217107
FCA_GND8125924_TACTTACGTTCACGGC	0.000898448	0.000794048	0.00102877	0.00607446	0.00157524	0.00648465	0.0010529	0.00995387	0.114867	0.0100286	0.826578	0.0022171	0.00379136	0.00125829	0.00120575	0.00386092	0.0032333	0.00118547	0.000715402	0.00126475	0.000848942	0.00108222
FCA_GND8125924_TAGACCATCGTAGGTT	0.00298333	0.00159905	0.00532904	0.00923963	0.00248451	0.0122735	0.00253276	0.247573	0.0417691	0.000413482	0.000261341	0.151575	0.00898362	0.42664	0.0426288	0.00197747	0.000515387	0.0243658	0.000354626	0.0128884	0.00198387	0.00162816
FCA_GND8125924_TAGCCGGGTTCGAATC	0.00219646	0.00231468	0.00907413	0.0903825	0.00861747	0.0277496	0.0219106	0.443817	0.191723	0.000506854	0.000356475	0.0992482	0.00712553	0.00936444	0.0117229	0.0111066	0.0014361	0.0241943	0.000401917	0.0279395	0.00436681	0.00444452
FCA_GND8125924_TATCAGGTCGGTGTCG	0.0177479	0.0994068	0.152093	0.022084	0.00474031	0.0331056	0.00538235	0.0334917	0.0752955	0.00250739	0.00238626	0.327363	0.0183863	0.0193521	0.0859102	0.00984565	0.00313705	0.0117186	0.00528486	0.0612708	0.00425709	0.00523323
FCA_GND8125924_TCACAAGGTCGCCATG	1.98753e-05	2.66797e-05	4.36194e-06	0.00559382	4.01938e-05	4.70429e-05	2.50497e-05	5.40709e-05	0.000788269	0.000189873	3.29739e-05	1.00285e-05	0.0056242	1.0405e-05	5.197e-05	0.987297	2.89857e-05	6.12811e-05	1.85246e-05	4.87254e-05	1.91318e-05	7.51788e-06
FCA_GND8125924_TCACGAACAGTTTACG	0.000106949	8.63831e-05	8.80761e-05	0.0177443	7.5032e-05	0.00170682	7.84411e-05	0.000252681	0.00501092	0.000129399	5.2169e-05	0.000153212	0.00753376	5.66192e-05	0.000228332	0.96593	0.00013693	0.000223699	3.23485e-05	0.00022025	8.28484e-05	7.06311e-05
FCA_GND8125924_TCACGAATCCAAACAC	0.000758482	0.000765706	0.0163988	0.00107842	0.00528229	0.00672774	0.00075461	0.00662672	0.00209365	0.00074202	0.000414858	0.786572	0.012593	0.00311942	0.00274686	0.000679082	0.000640006	0.143791	0.000375051	0.00650025	0.000627902	0.000711779
FCA_GND8125924_TCAGCAAAGATCCGAG	5.12325e-05	4.22697e-05	3.51359e-05	0.0166448	4.15228e-05	7.89965e-05	4.4502e-05	8.20128e-05	0.00111377	0.000107811	3.20875e-05	3.26405e-05	0.00420191	1.93978e-05	3.40612e-05	0.977232	4.19334e-05	7.12367e-05	1.78093e-05	4.83667e-05	1.57135e-05	1.10219e-05
FCA_GND8125924_TCAGCAAAGCGATATA	0.000968488	0.000751112	0.000786069	0.0430421	0.00151057	0.00655044	0.00210325	0.00884402	0.131835	0.000698579	0.000548755	0.000970701	0.122813	0.000864486	0.00173135	0.663213	0.000836603	0.00115329	0.000663442	0.00729019	0.000845866	0.00198001
FCA_GND8125924_TCAGCTCCATCCGTGG	4.09878e-05	2.64645e-05	6.69892e-06	0.0197122	2.48172e-05	0.000369009	8.78079e-05	4.47278e-05	0.000267591	8.26381e-05	4.1158e-05	7.8971e-06	0.00234245	2.00787e-05	3.19547e-05	0.976404	0.000204941	3.93062e-05	9.22889e-06	0.000198482	2.80313e-05	9.32249e-06
FCA_GND8125924_TCAGCTCTCATCATTC	1.9623e-05	2.57476e-05	5.18471e-06	0.00265835	7.87852e-05	0.000258206	0.000130328	7.94845e-05	0.000813516	7.9957e-05	4.92972e-05	1.37782e-05	0.00189179	1.14699e-05	3.31029e-05	0.993354	0.000231903	8.63953e-05	2.40744e-05	7.33155e-05	5.8754e-05	2.27401e-05
FCA_GND8125924_TCAGGATTCACTGGGC	0.000790553	0.000942832	0.00405912	0.00966095	0.00266505	0.0208686	0.000314253	0.473956	0.0713242	0.000378129	0.000214029	0.387068	0.00434777	0.0115096	0.000730193	0.00102417	0.000306168	0.00622485	0.000240102	0.0027173	0.00036797	0.000290355
FCA_GND8125924_TCCACACAGTTTAGGA	0.000276	0.00015148	0.000195446	0.0826669	8.62896e-05	0.003241	0.000362647	0.00131526	0.0186921	8.40416e-05	5.96876e-05	0.000170967	0.00514176	0.000161296	0.000519368	0.885402	0.000128281	0.000170555	4.98343e-05	0.000789794	0.000187768	0.000147245
FCA_GND8125924_TCGCGTTCAAACCTAC	4.22553e-05	4.20258e-05	2.3171e-05	0.0142776	0.000245137	0.000613734	0.000197865	8.27792e-05	0.000747348	0.00013339	6.39853e-05	9.42418e-06	0.00336146	1.13076e-05	3.29221e-05	0.979448	0.000203281	0.00027378	4.17961e-05	5.18752e-05	6.5062e-05	3.16744e-05
FCA_GND8125924_TCGGTAATCACCACCT	0.506176	0.000125945	0.00018648	8.57537e-05	3.93881e-05	0.000192379	2.16444e-05	0.000643757	0.000350586	4.04765e-05	3.28237e-05	0.000159707	6.46001e-05	0.000120422	5.85658e-05	2.52507e-05	9.17855e-05	9.02107e-05	0.000100993	0.476354	0.00206825	0.0129708
FCA_GND8125924_TCGTACCAGGATTCGG	0.00366937	0.00200168	0.25751	0.029633	0.00259022	0.0347313	0.001647	0.114507	0.0489314	0.000626315	0.000592748	0.306901	0.00834567	0.0657574	0.085479	0.00494407	0.000992026	0.00908231	0.000902927	0.0143127	0.00212424	0.00471853
FCA_GND8125924_TCGTACCCACGGCGTT	0.000722871	0.00141205	0.00215709	0.00489219	0.00224046	0.013107	0.0047304	0.39418	0.103274	0.000732642	0.000952711	0.410793	0.00588991	0.023987	0.00442076	0.011759	0.000757542	0.00899108	0.000555242	0.00219206	0.000990484	0.00126239
FCA_GND8125924_TCGTAGACACACAGAG	0.00522681	0.00337621	0.00875869	0.155632	0.00373766	0.0134676	0.00514914	0.00635854	0.00908217	0.00259981	0.00168812	0.0070541	0.0579574	0.00445093	0.00458701	0.69082	0.00228552	0.00425292	0.00174898	0.00676604	0.0027935	0.00220608
FCA_GND8125924_TCTGAGAAGTGGTCCC	0.00441796	0.00241398	0.0180147	0.066647	0.0113956	0.031621	0.0211047	0.441923	0.130309	0.000733369	0.000512587	0.116609	0.0106442	0.0194433	0.02043	0.011877	0.0015833	0.0411585	0.000662658	0.0349146	0.00680767	0.00677631
FCA_GND8125924_TCTTCGGTCGCCCTTA	0.00589825	0.0023959	0.00372024	0.0115832	0.00239032	0.00835845	0.00181433	0.00351182	0.116833	0.00186752	0.00127792	0.00655341	0.00226767	0.00228852	0.00763796	0.001795	0.00253391	0.00377768	0.00173159	0.0354183	0.267188	0.509158
FCA_GND8125924_TCTTTCCGTAGCGATG	0.000829806	0.000460845	0.000907959	0.01817	0.000370098	0.00224225	0.000532613	0.000822144	0.00191778	0.000320411	0.000233552	0.000741017	0.00426332	0.000909962	0.000890691	0.963414	0.000329622	0.0007884	0.000438323	0.000723596	0.00038028	0.000313493
FCA_GND8125924_TCTTTCCTCACTGGGC	0.000141484	0.000180311	0.000207202	0.00176572	0.000408729	0.0111018	0.000606083	0.0010795	0.008147	0.0001815	0.000106605	0.0150241	0.000610114	0.951411	0.000783471	0.000634549	0.00014099	0.00140201	7.42996e-05	0.00569582	0.000213299	8.40702e-05
FCA_GND8125924_TGACTAGAGCCCAGCT	0.0253829	0.01363	0.0154254	0.0424134	0.0112382	0.222108	0.00644495	0.124623	0.121568	0.00568237	0.00637534	0.254297	0.0246903	0.0324747	0.00870092	0.0129943	0.00697791	0.00869265	0.00519512	0.0378221	0.00711793	0.0061451
FCA_GND8125924_TGACTAGCAATTCCTT	0.0017773	0.00126368	0.00207167	0.0409559	0.0100386	0.0180766	0.0580319	0.678795	0.0966155	0.000762932	0.000702076	0.0184971	0.00982361	0.00422387	0.00840609	0.0175117	0.00125029	0.0133648	0.00045469	0.0118577	0.00196782	0.00355114
FCA_GND8125924_TGACTTTAGGAGCGAG	0.000126274	9.08789e-05	0.00016053	0.0480941	0.00176563	0.0119918	0.000203183	0.00725929	0.901767	0.000106493	8.6166e-05	0.000318415	0.000620528	0.000225453	0.00849891	0.00343404	6.66678e-05	0.000185359	9.25766e-05	0.0131314	0.000125413	0.00165035
FCA_GND8125924_TGAGCATGTGGACGAT	0.0137683	0.00678056	0.170806	0.0265771	0.00838741	0.106161	0.00419227	0.178711	0.0875084	0.00290188	0.00245971	0.21257	0.0152459	0.0333872	0.0686661	0.00532517	0.00303864	0.0116687	0.00355345	0.02058	0.00853424	0.00917739
FCA_GND8125924_TGAGCCGAGCGCTCCA	0.0108846	0.00518882	0.00719983	0.0460408	0.0190251	0.00852627	0.0199518	0.0193215	0.0134648	0.00389075	0.00333422	0.00917902	0.117263	0.00660948	0.00674351	0.614934	0.00491733	0.0556504	0.00366871	0.0140309	0.00571384	0.00446165
FCA_GND8125924_TGAGGGAGTACCGGCT	0.0271554	0.00829047	0.113342	0.0238158	0.00645717	0.0274917	0.00817984	0.0601597	0.0787272	0.00171335	0.00143446	0.457318	0.0220465	0.0222426	0.041362	0.00519418	0.00206597	0.0167947	0.00184182	0.0627646	0.00694703	0.0046557
FCA_GND8125924_TGATTTCCAGGGAGAG	0.000357925	0.000340212	0.00196064	0.00209597	0.00117688	0.00753871	0.00791684	0.940438	0.00868293	0.000272114	0.000344553	0.00491096	0.00439688	0.00245575	0.00285339	0.00279835	0.000238442	0.00929812	0.000244506	0.00103275	0.000270162	0.000376072
FCA_GND8125924_TGATTTCTCCACGTTC	0.000113488	0.000488997	0.000348251	0.0146511	0.00238193	0.00177381	0.000900371	0.00298099	0.00349143	0.000173122	0.000118768	0.000634204	0.0451896	0.000800998	0.000587936	0.919558	0.000258324	0.004532	0.000237143	0.000295755	0.000258096	0.000226171
FCA_GND8125924_TGCACCTGTCGAATCT	0.0045052	0.00474085	0.00521127	0.0504628	0.00987439	0.0542602	0.0516874	0.00792955	0.101275	0.0046649	0.00306058	0.185394	0.00885495	0.415188	0.0113484	0.0354003	0.00380086	0.0182157	0.00295564	0.0134616	0.00426653	0.00344179
FCA_GND8125924_TGCCAAATCAAGATCC	6.32831e-05	1.7364e-05	9.76262e-05	0.0269872	2.37889e-05	0.000403887	1.70056e-05	0.000131289	0.00518133	9.45888e-05	4.15848e-05	0.000111109	0.0024224	3.67883e-05	0.000138154	0.96399	6.43086e-05	8.04033e-05	1.1078e-05	3.86283e-05	3.44316e-05	1.34649e-05
FCA_GND8125924_TGCCCATTCCATGCTC	0.000761297	0.000162365	0.00201861	0.00337975	0.00158035	0.0241874	0.000163927	0.867548	0.0410295	0.000133527	0.000152938	0.0391555	0.00114136	0.00275554	0.00412786	0.00184445	0.000220659	0.00196211	0.000178825	0.00156923	0.000991738	0.00493496
FCA_GND8125924_TGCCCTACATAGACTC	0.0121377	0.00701272	0.0251015	0.0142404	0.0290927	0.226123	0.0305039	0.175039	0.123799	0.00472013	0.00378423	0.0630428	0.0604221	0.0293903	0.036038	0.0183987	0.0075438	0.0338748	0.00415334	0.0599815	0.00904481	0.0265555
FCA_GND8125924_TGCGGGTTCACTTACT	0.00291041	0.00140932	0.25527	0.012349	0.00202926	0.0153009	0.000977883	0.0939837	0.0323586	0.000320802	0.000226886	0.527171	0.00325177	0.0160004	0.0192228	0.00129174	0.000390901	0.0043296	0.000408316	0.00677763	0.00207665	0.0019424
FCA_GND8125924_TGCTACCGTTTGGCGC	0.000177304	7.64108e-05	5.62992e-05	0.0456114	0.000169668	0.000278838	0.00451543	0.000229598	0.000419256	9.23023e-05	8.44736e-05	6.87088e-05	0.0100158	7.04754e-05	0.000112741	0.937165	0.000160941	0.000158748	7.52636e-05	0.000259148	0.000137543	6.45171e-05
FCA_GND8125924_TGCTGCTCACGAGGTA	0.00143255	0.000676819	0.00378761	0.00645349	0.00313757	0.00571897	0.00299314	0.85129	0.0197295	0.000347985	0.000269162	0.00849312	0.00300699	0.00452168	0.00245506	0.00311478	0.000948449	0.0480702	0.000954928	0.010992	0.00893659	0.0126689
FCA_GND8125924_TGCTGCTTCAAACGGG	0.127377	0.000418521	0.0029428	0.0010137	0.000178722	0.00457414	0.000159828	0.00635784	0.00450116	0.000218707	0.000129554	0.00086995	0.000328417	0.000512882	0.0014418	0.000374452	0.00019289	0.000509814	0.000472309	0.815214	0.011215	0.020996
FCA_GND8125924_TGGACGCAGAGGGATA	0.429204	0.000268748	0.000612593	0.000470966	0.000263104	0.000352296	0.000163946	0.000721792	0.00523374	0.000184608	0.000136038	0.000673422	0.000417649	0.00052161	0.000415542	0.000164568	0.000167829	0.000296179	0.000319092	0.530438	0.016628	0.0123465
FCA_GND8125924_TGGCCAGTCGTTACAG	0.00035155	0.000204236	0.000201079	0.0583103	0.000410542	0.000804582	0.000871742	0.000747985	0.00430583	0.000163506	0.000156571	0.000227552	0.0169226	0.000197052	0.000480628	0.912852	0.000263907	0.000496904	0.000231689	0.0011183	0.000367698	0.000313704
FCA_GND8125924_TGGGCGTCAAAGGTGC	3.38219e-05	1.33873e-05	7.64104e-06	0.037785	3.11822e-05	0.000135331	0.000202548	8.48071e-05	0.00200461	6.00549e-05	3.30134e-05	1.22944e-05	0.00650461	9.44265e-06	3.84996e-05	0.952792	3.09826e-05	5.35872e-05	2.37057e-05	9.34781e-05	3.71592e-05	1.25785e-05
FCA_GND8125924_TGTGGTACAGAGCCAA	0.00049342	0.000416432	0.000481602	0.0601632	0.000480977	0.00883368	0.00222494	0.00133897	0.00542917	0.000275521	0.000192328	0.000581337	0.0171786	0.000527888	0.00163276	0.896536	0.000377838	0.000822495	0.000257769	0.000952386	0.000331599	0.000471412
FCA_GND8125924_TGTGTTTGTCTCATCC	0.0059493	0.00347367	0.0205394	0.040474	0.00504972	0.0258307	0.0161402	0.310218	0.211735	0.00134701	0.00104785	0.0756871	0.0394226	0.0223919	0.0724749	0.0150008	0.00216555	0.0208455	0.00142797	0.0883567	0.0061575	0.0142642
FCA_GND8125924_TGTGTTTTCTGCCAGG	6.9693e-05	4.64972e-05	9.69753e-05	0.0210194	6.23317e-05	0.00127513	6.4759e-05	0.000486611	0.0039748	5.50222e-05	4.77483e-05	6.88434e-05	0.0255762	5.20397e-05	0.000155295	0.946114	7.01859e-05	0.000249658	2.91935e-05	0.000401198	4.41838e-05	4.03553e-05
FCA_GND8125924_TGTTCCGCATCGGGTC	0.00785555	0.000879576	0.00130126	0.00347704	0.000818662	0.00213211	0.00041439	0.000990863	0.00201534	0.000480613	0.000306198	0.0126777	0.000493052	0.000736899	0.00339853	0.000395668	0.000505955	0.000585956	0.00180065	0.0359575	0.20959	0.713186
FCA_GND8125924_TTAGTTCAGTGTACTC	0.00537143	0.00417378	0.0497304	0.0334902	0.00375764	0.0285302	0.012312	0.110343	0.170367	0.00129765	0.00113742	0.411248	0.0140739	0.028879	0.0591296	0.0114561	0.00240003	0.0102106	0.00138004	0.0210338	0.00777871	0.0118999
FCA_GND8125924_TTCCCAGGTACCGAGA	0.0102846	0.00289013	0.258197	0.0117257	0.00514232	0.0146202	0.00216173	0.060622	0.0156832	0.000464718	0.000361941	0.540553	0.00323472	0.0214152	0.0148857	0.00155964	0.000601242	0.0073476	0.000923783	0.0144703	0.00786558	0.00498974
FCA_GND8125924_TTCGGTCCATGGGACA	0.0164154	0.0037301	0.0214252	0.0220159	0.0189109	0.0383004	0.00750792	0.218771	0.0482975	0.00299467	0.0026686	0.184126	0.0155149	0.0110975	0.0100263	0.00450365	0.00392335	0.315714	0.00290784	0.0387081	0.00731361	0.00512756
FCA_GND8125924_TTCTCAACAGGACGTA	0.000122066	0.00021498	0.000489836	0.410125	8.61777e-05	0.0180742	0.000248183	0.000283111	0.00286101	0.000105036	0.000171774	7.41502e-05	0.00769045	0.000273003	0.000107732	0.557078	0.000123275	0.000248983	8.70555e-05	0.00139647	6.51741e-05	7.48763e-05
FCA_GND8125924_TTCTCAACATGTAAGA	0.00654468	0.00299984	0.0619866	0.0336008	0.00636869	0.0462369	0.00343498	0.0626035	0.146134	0.00133159	0.00135336	0.464066	0.0100974	0.0179012	0.089506	0.00439664	0.00221576	0.0100897	0.00175944	0.0181998	0.00379793	0.00537465
FCA_GND8125924_TTCTCAAGTGCGATAG	0.000134247	5.08983e-05	4.29891e-05	0.074398	3.16725e-05	0.00285061	4.10009e-05	0.000341167	0.0130644	6.14543e-05	4.06409e-05	3.29813e-05	0.00150502	4.40936e-05	0.000157647	0.906208	5.04352e-05	0.000230051	2.009e-05	0.000581478	8.49129e-05	2.78195e-05
FCA_GND8125924_TTCTCAATCTGACCTC	0.00658316	0.00467374	0.244961	0.0300302	0.0026519	0.0450807	0.00295896	0.0124731	0.0589063	0.00143712	0.00127421	0.149179	0.018828	0.146636	0.236166	0.00337131	0.00172653	0.00380082	0.00163655	0.0215314	0.00297204	0.00312235
FCA_GND8125924_TTCTTAGCACGGTTTA	0.000340417	0.000283003	0.00187856	0.0403303	0.0100831	0.0726037	0.00113462	0.0222897	0.816092	0.000392142	0.000280322	0.00669809	0.00576738	0.00146849	0.000431092	0.0079154	0.000702729	0.00238803	0.000276771	0.00763671	0.00031714	0.000690091
FCA_GND8125924_TTGACTTCAATAGAGT	0.0205855	0.00786964	0.0482308	0.0479073	0.00773965	0.157142	0.00840311	0.0694849	0.412099	0.00548551	0.00592008	0.0774458	0.0249875	0.0321974	0.0158075	0.0110714	0.00579595	0.0131039	0.0047512	0.0116012	0.00594188	0.00642901
FCA_GND8125924_TTGACTTTCGGCGCTA	0.0014706	0.00318579	0.0234944	0.00878406	0.00382333	0.0175216	0.000896729	0.805851	0.0471316	0.000338081	0.00024964	0.0442917	0.00697273	0.0166237	0.00380723	0.00279772	0.000329849	0.00837533	0.000268228	0.00167639	0.000714442	0.00139527
FCA_GND8125924_TTGCCGTAGCATGGCA	0.0133397	0.00571855	0.0303365	0.0422898	0.0134802	0.0483332	0.0336124	0.443045	0.088877	0.00243298	0.00211264	0.0755047	0.0371171	0.018624	0.0447023	0.00844823	0.00325654	0.0200891	0.00243735	0.0523839	0.00551246	0.00834689
FCA_GND8125924_TTGGCAAAGTGGTAGC	0.00707744	0.0102217	0.00750163	0.0164443	0.0417239	0.11144	0.0244447	0.291783	0.351254	0.00450596	0.00205573	0.0395208	0.00537404	0.00962166	0.00589899	0.0115852	0.0103612	0.0119885	0.00252079	0.0141473	0.0117887	0.00874072
FCA_GND8125924_TTTGCGCTCTGAGTGT	2.05963e-05	3.29767e-05	5.29925e-06	0.00429535	1.0135e-05	2.14431e-05	9.27804e-06	1.14999e-05	0.00128616	0.00033701	3.269e-05	5.63742e-05	0.00104023	3.89153e-05	4.99178e-05	0.992643	2.66143e-05	2.49543e-05	5.58406e-06	1.70001e-05	2.61839e-05	8.64964e-06
FCA_GND8125924_TTTGGTTCAATAACGA	5.00167e-05	0.000159222	9.46705e-05	0.0258943	0.000147677	0.0026331	9.73773e-05	0.000409614	0.00196804	0.000137621	6.43612e-05	0.00015035	0.00580403	9.12907e-05	0.000151248	0.961497	5.69367e-05	0.000185765	4.17128e-05	0.000284877	4.11511e-05	3.95609e-05
FCA_GND8103049_AAACCTGAGCAATATG	7.34855e-05	0.000122256	0.000129015	0.241613	4.98032e-05	0.000842241	0.000162199	7.23092e-05	0.00146573	0.000139577	7.88003e-05	3.47121e-05	0.0106318	2.25607e-05	3.38376e-05	0.743865	8.87197e-05	8.69326e-05	2.26639e-05	0.000405758	3.45694e-05	2.53997e-05
FCA_GND8103049_AAACCTGAGCTGTTCA	0.00201248	0.000373287	0.000872635	0.0993988	0.00176642	0.00304127	0.0157334	0.00741136	0.00616064	0.000274787	0.000165263	0.00129957	0.102695	0.000600535	0.00302116	0.746231	0.000487614	0.00121231	0.000173929	0.00603433	0.000734429	0.00029952
FCA_GND8103049_AAACCTGAGGTGTTAA	0.00526551	0.00131569	0.0320631	0.0121779	0.0142463	0.0371381	0.00184475	0.155088	0.0762661	0.000506518	0.000311067	0.606455	0.00160324	0.00710029	0.0108474	0.0012967	0.000718175	0.0171047	0.00037303	0.012289	0.00433381	0.00165502
FCA_GND8103049_AAACCTGCAAACTGCT	0.00694228	0.00263419	0.0424425	0.0180007	0.0133033	0.038135	0.0046553	0.326703	0.105864	0.000766323	0.000510373	0.302674	0.00285741	0.0198133	0.0401357	0.00311208	0.00115765	0.029729	0.000660261	0.0300553	0.00516952	0.00467903
FCA_GND8103049_AAACCTGCAAGTTGTC	0.000849279	0.000429059	0.000352743	0.861677	0.000910444	0.00169673	0.0137817	0.00135031	0.00558638	0.000339578	0.000370566	0.000494665	0.027195	0.000434489	0.000433075	0.0789795	0.000633746	0.000631308	0.000285792	0.00146479	0.00162012	0.000483713
FCA_GND8103049_AAACCTGCACCAACCG	8.92406e-05	7.90745e-05	2.31913e-06	0.985418	2.77163e-05	0.000143633	0.00206062	2.65162e-05	4.70514e-05	2.94245e-05	5.2263e-05	4.91538e-06	0.000537472	2.65226e-06	1.57517e-05	0.0105709	3.03274e-05	1.18911e-05	1.83597e-05	0.000775419	2.22519e-05	3.3806e-05
FCA_GND8103049_AAACCTGGTGCGCTTG	0.00111702	0.000662908	0.00506548	0.00953961	0.00279125	0.0129313	0.0021843	0.587404	0.0473656	0.000254429	0.00012795	0.282856	0.00523	0.00784879	0.00371585	0.00141982	0.000386146	0.0231241	0.000111374	0.00417847	0.00103336	0.000652463
FCA_GND8103049_AAACCTGTCCTAGGGC	0.000308753	0.000217148	0.000313022	0.00872439	0.000265593	0.00184413	0.000390112	0.00102553	0.00285088	9.41362e-05	6.57606e-05	0.000453975	0.0329652	0.000166839	0.000517423	0.943522	0.000131693	0.00059326	4.92404e-05	0.00517335	0.000218058	0.000109947
FCA_GND8103049_AAACCTGTCGAGCCCA	0.00141098	0.0004096	0.0239522	0.00639226	0.000589343	0.0123399	0.00092826	0.039242	0.0245101	0.000211009	0.000141915	0.841881	0.00253518	0.0156932	0.00749957	0.000323829	0.00028808	0.0115789	0.00016124	0.00853961	0.00097566	0.000396103
FCA_GND8103049_AAACCTGTCGCTAGCG	0.0179134	0.000675511	0.00296012	0.000924958	0.000875812	0.000849094	0.000278372	0.00257535	0.00411768	0.000394031	0.000198963	0.0019108	0.00078878	0.00152573	0.00397314	0.000148895	0.000406115	0.00186802	0.000339186	0.598348	0.00169009	0.357238
FCA_GND8103049_AAACCTGTCTATCCCG	0.00211221	0.000640535	0.0110947	0.0100257	0.00304935	0.00532635	0.00364407	0.609379	0.0179321	0.000213628	0.000183568	0.256117	0.00225975	0.00962462	0.00465058	0.00107737	0.000327548	0.0556662	0.000181011	0.0050525	0.00100256	0.000439227
FCA_GND8103049_AAACGGGAGCAATATG	3.60559e-05	0.000140872	0.000143495	0.000309842	7.68759e-05	0.000481647	0.000254393	0.000266007	0.000307921	7.84219e-05	3.44468e-05	0.0110535	0.000723945	0.968916	0.0161545	0.000120057	3.46113e-05	0.000636798	2.37857e-05	0.000137362	4.53991e-05	2.40608e-05
FCA_GND8103049_AAACGGGAGCTAGTCT	0.00299817	0.0016578	0.0240529	0.0196749	0.00642931	0.0111088	0.00271637	0.590439	0.0436304	0.000420958	0.000286744	0.1952	0.00350402	0.0192331	0.0148614	0.00172547	0.000640948	0.0462854	0.000548877	0.00950052	0.00294506	0.00213978
FCA_GND8103049_AAACGGGGTACTCTCC	0.00251764	0.00446442	0.00570531	0.0124228	0.00417504	0.0426897	0.00820412	0.0122969	0.0760525	0.00202138	0.00155116	0.0202424	0.00780263	0.325266	0.435662	0.00592413	0.00329558	0.0139251	0.00156848	0.00620341	0.00567435	0.00233484
FCA_GND8103049_AAACGGGGTGACCAAG	0.00435418	0.00186037	0.00413759	0.210847	0.0015967	0.011609	0.00332014	0.0133918	0.0406065	0.00122297	0.000868861	0.00218421	0.121826	0.00228991	0.00402552	0.529455	0.001343	0.00216005	0.000973969	0.0384505	0.00155998	0.00191613
FCA_GND8103049_AAACGGGTCAACACTG	0.00469276	0.00137757	0.0127788	0.00565375	0.00210865	0.0336734	0.00348936	0.176339	0.0503724	0.000827497	0.000671016	0.623744	0.00551694	0.0242513	0.00625219	0.00166199	0.000966562	0.0266123	0.000738585	0.0135121	0.00273352	0.0020262
FCA_GND8103049_AAACGGGTCATATCGG	0.0035131	0.00300153	0.00320679	0.205375	0.00771091	0.220941	0.0345911	0.00673477	0.284993	0.00401615	0.00265371	0.00419665	0.017877	0.0033086	0.00595732	0.0434278	0.00465028	0.00411945	0.00381789	0.121402	0.00609717	0.00840816
FCA_GND8103049_AAACGGGTCCATGAGT	0.000244876	0.000107546	6.15032e-05	0.767912	9.70704e-05	0.000763253	0.000589661	0.000412182	0.00288072	4.11243e-05	0.000209267	7.69641e-05	0.00933145	7.02249e-05	0.000135813	0.214582	0.00025534	9.65162e-05	7.59455e-05	0.0019028	0.000103722	5.01055e-05
FCA_GND8103049_AAACGGGTCCCACTTG	0.00159078	0.00214768	0.00564137	0.100949	0.00590172	0.0301524	0.0171184	0.032886	0.154458	0.000988444	0.000876619	0.012572	0.312919	0.00341369	0.0246076	0.248929	0.00169736	0.0089623	0.00107392	0.0273417	0.00193552	0.00383676
FCA_GND8103049_AAAGATGAGGTACTCT	0.0014295	0.00120888	0.00671824	0.0154718	0.00453222	0.0142504	0.00336159	0.468681	0.0549414	0.000857968	0.000673261	0.227932	0.00782832	0.156476	0.00428672	0.00258917	0.00149294	0.0216928	0.000639259	0.00252564	0.00143212	0.00097907
FCA_GND8103049_AAAGATGCAAATCCGT	0.00492374	0.00360806	0.0899757	0.043339	0.00662986	0.0120584	0.00582742	0.0915159	0.0355256	0.00149361	0.00125863	0.489607	0.00553546	0.0407116	0.0689704	0.00402667	0.00402077	0.0381874	0.00164367	0.0340689	0.0116337	0.00543872
FCA_GND8103049_AAAGATGCACGTCTCT	0.00266527	0.00125009	0.0314323	0.00938737	0.00500309	0.0111376	0.00114173	0.256426	0.0262373	0.000253896	0.000136501	0.615148	0.00137086	0.0085022	0.00443236	0.000830962	0.000331055	0.0163585	0.000140236	0.00548408	0.00164096	0.000690306
FCA_GND8103049_AAAGATGCAGGCGATA	0.0030267	0.00151217	0.0722823	0.0128801	0.00310384	0.0117527	0.00224028	0.225307	0.0341979	0.000449255	0.000251956	0.553954	0.00285683	0.0190811	0.011496	0.00142141	0.000605769	0.028209	0.000370237	0.0116499	0.00204412	0.00130728
FCA_GND8103049_AAAGATGGTATTCTCT	2.77315e-05	3.95878e-05	1.09336e-05	0.000508634	4.29761e-05	0.0002513	7.86153e-05	0.000143595	0.00336773	0.99422	4.68283e-05	0.000108767	4.9429e-05	0.000641424	4.86651e-05	0.00011278	5.27573e-05	3.32152e-05	1.52617e-05	0.000143227	2.90082e-05	2.71478e-05
FCA_GND8103049_AAAGATGGTCAATGTC	0.00110768	0.00122848	0.00180553	0.0145898	0.00759562	0.0128329	0.0105558	0.0124445	0.0379826	0.000905517	0.000628132	0.131603	0.00529753	0.713942	0.00964071	0.00628564	0.000925039	0.0212924	0.00063982	0.00641725	0.00147443	0.000805625
FCA_GND8103049_AAAGATGGTGGGTATG	0.0110982	0.00792161	0.0242809	0.0580061	0.0172488	0.0490484	0.0221909	0.041149	0.131611	0.00612409	0.00491006	0.132554	0.0301233	0.268948	0.0672827	0.0362861	0.00607822	0.0347973	0.00564796	0.0294667	0.00732094	0.00790528
FCA_GND8103049_AAAGATGGTTAAGAAC	0.00389631	0.00447053	0.0118856	0.0411569	0.0103372	0.0296121	0.0251769	0.178132	0.20878	0.00308016	0.00248011	0.147796	0.0188246	0.178315	0.0449126	0.0109426	0.00353501	0.0536288	0.00272501	0.0116633	0.00480821	0.00384093
FCA_GND8103049_AAAGATGTCGTCCAGG	0.000120114	0.000498826	0.00385635	0.00245529	0.000173638	0.00201503	0.000271672	0.0021021	0.00122432	0.000366791	0.000135323	0.00623579	0.00503249	0.212603	0.757061	0.000209311	0.000243213	0.00424004	6.42791e-05	0.000826429	0.000185486	7.98365e-05
FCA_GND8103049_AAAGATGTCGTGGACC	0.000176732	0.000295288	0.000375606	0.00483245	0.00206105	0.000475444	0.000915159	0.00161801	0.00207439	0.000144955	7.58549e-05	0.000423226	0.0475581	0.000149921	0.000615019	0.934847	0.000176776	0.00205771	9.82629e-05	0.000739342	0.00022847	6.11408e-05
FCA_GND8103049_AAAGCAACACATTTCT	0.00132561	0.0015184	0.00236581	0.0217943	0.00285756	0.021146	0.0141062	0.803353	0.0766864	0.000357252	0.000226795	0.00718388	0.00654642	0.00294461	0.00223173	0.00336821	0.000750837	0.0181579	0.000326104	0.0110257	0.000700312	0.00102721
FCA_GND8103049_AAAGCAACACCCATGG	0.00229364	0.000737295	0.00271708	0.0146792	0.00553976	0.032435	0.00116503	0.581172	0.208642	0.000456208	0.000265044	0.122088	0.00362793	0.00113715	0.000452814	0.00393742	0.000689684	0.00258635	0.000243066	0.0144331	0.000407898	0.00029347
FCA_GND8103049_AAAGCAACACTACAGT	0.00275297	0.000151623	0.00044898	0.000101355	5.63756e-05	0.000934197	0.000180745	0.00154196	0.000132332	0.000132077	0.000129844	0.00138458	0.000195828	0.000206245	0.000420441	2.69444e-05	0.000309929	0.000158787	4.99732e-05	0.97935	0.000149844	0.0111851
FCA_GND8103049_AAAGCAACATGACATC	0.00141829	0.00172616	0.0103513	0.00628746	0.00715222	0.00611609	0.00889226	0.412297	0.0439948	0.000589436	0.000319842	0.408247	0.0042365	0.0173098	0.00596455	0.00188375	0.000803299	0.0550619	0.000386132	0.00406376	0.00211392	0.000783983
FCA_GND8103049_AAAGCAAGTAATTGGA	9.8099e-05	0.000116614	4.01654e-05	0.703245	0.000110504	0.000150342	0.0326664	0.000151827	0.000425333	6.46411e-05	0.000135015	5.18807e-05	0.00648941	4.63223e-05	6.07297e-05	0.255496	0.000194438	8.15937e-05	4.16807e-05	0.000206207	8.17684e-05	4.56346e-05
FCA_GND8103049_AAAGCAAGTCACCTAA	0.0127173	0.0043236	0.0117351	0.0164	0.00603441	0.0673083	0.0111303	0.0673493	0.123314	0.00275829	0.00277997	0.0779054	0.0326687	0.412251	0.0532523	0.0193011	0.00333096	0.00904913	0.00387436	0.0409878	0.00615747	0.0153709
FCA_GND8103049_AAAGCAAGTCATGCAT	0.000814946	0.000654725	0.00499756	0.00266123	0.00149408	0.00924457	0.0169866	0.857459	0.0494033	0.000425088	0.000228993	0.0201542	0.00535402	0.00500714	0.00170449	0.000965407	0.000673929	0.0186416	0.000337653	0.0016179	0.000760687	0.000412597
FCA_GND8103049_AAAGCAAGTCTAGAGG	0.00474702	0.00161037	0.0592253	0.00888882	0.00500948	0.0120857	0.00460627	0.36425	0.0209333	0.00035581	0.000235817	0.432732	0.00232511	0.0200151	0.0126476	0.00200672	0.000657492	0.0229439	0.000534789	0.0122482	0.00718746	0.00475393
FCA_GND8103049_AAAGCAAGTCTCAACA	0.000979189	0.000435952	0.00675789	0.00585547	0.00187721	0.0113348	0.00173359	0.761312	0.0418022	0.000213764	0.000121568	0.111181	0.00576801	0.00618813	0.00750771	0.0012258	0.000424793	0.0278505	0.000170241	0.00455467	0.00145092	0.00125497
FCA_GND8103049_AAAGCAAGTTTCGCTC	0.0066934	0.00235807	0.0688517	0.00867844	0.00501694	0.0210858	0.00249263	0.398995	0.0190668	0.000895586	0.000784594	0.381348	0.00482333	0.033531	0.00540461	0.00195451	0.00119003	0.022959	0.0012464	0.00877055	0.0023249	0.00152875
FCA_GND8103049_AAAGCAATCTGGTATG	0.00118142	0.000701182	0.0182065	0.00681594	0.00140991	0.00704284	0.00117425	0.531454	0.0133649	0.000324144	0.000240234	0.294607	0.00459132	0.0212009	0.00865176	0.00103723	0.000425438	0.081211	0.000310227	0.00424503	0.000986243	0.000819199
FCA_GND8103049_AAAGTAGAGAAGGTTT	0.00450988	0.00379914	0.0726084	0.0344971	0.00606295	0.0246713	0.00567134	0.0984031	0.095762	0.00227305	0.00183946	0.0974242	0.0181244	0.433279	0.0566251	0.00399252	0.00242427	0.0188016	0.00209545	0.0113105	0.00299185	0.00283314
FCA_GND8103049_AAAGTAGAGGGAGTAA	0.00180096	0.000844138	0.00672846	0.00658783	0.0163951	0.0141353	0.0318484	0.784143	0.0445667	0.000553067	0.000362425	0.0300396	0.00927936	0.00405276	0.00378977	0.00204013	0.000943166	0.0362053	0.000409953	0.002729	0.00149916	0.00104647
FCA_GND8103049_AAAGTAGAGTGTTAGA	0.00133557	0.00102843	0.0127935	0.0141211	0.00537945	0.0209876	0.00494099	0.546807	0.0928933	0.000394168	0.000245723	0.230169	0.00420164	0.0117404	0.00939297	0.00388654	0.000967542	0.0252846	0.000334533	0.00788248	0.00322432	0.00198945
FCA_GND8103049_AAAGTAGGTCTCTTTA	0.000319132	0.000153963	0.000154678	0.0660923	0.000323558	0.00161499	0.000321463	0.00089881	0.00781727	0.000135632	0.000108707	0.00017002	0.0186088	0.000175845	0.000964429	0.899649	0.000129787	0.00034207	0.000181805	0.00141372	0.00020263	0.000221648
FCA_GND8103049_AAAGTAGTCGCCCTTA	0.00315942	0.000934486	0.11532	0.0092696	0.00211427	0.0135047	0.00205988	0.207701	0.0195498	0.000255633	0.000172173	0.506003	0.00220329	0.0606984	0.0209483	0.00156939	0.000510846	0.0211633	0.000297722	0.00944769	0.00158653	0.0015305
FCA_GND8103049_AAATGCCAGCTGATAA	0.0114692	0.000312386	0.00246243	0.000840072	0.000556895	0.00211513	0.000285634	0.0154245	0.00792486	0.000234818	0.000199978	0.00278746	0.000394634	0.000941461	0.002338	0.000334062	0.000333836	0.0015544	0.000168464	0.917084	0.000456775	0.0317815
FCA_GND8103049_AAATGCCAGTACGACG	0.000414204	0.00010461	0.00301063	0.00599487	0.000987062	0.00930734	0.00138419	0.920518	0.0135852	0.000172273	6.58416e-05	0.0245369	0.00252177	0.0015028	0.00318116	0.000512735	0.000197392	0.00968839	8.6281e-05	0.00178089	0.000214671	0.000232412
FCA_GND8103049_AAATGCCCAGGCTCAC	7.29896e-05	6.61486e-05	2.33765e-05	0.95204	0.000299641	0.000333965	0.0166399	0.00010533	0.000328949	3.61013e-05	8.3953e-05	2.75721e-05	0.00619002	2.60391e-05	3.12668e-05	0.0228571	0.000331061	5.8412e-05	2.48937e-05	0.000269441	0.000115359	3.84482e-05
FCA_GND8103049_AAATGCCGTAAAGTCA	0.00404935	0.00110675	0.0410659	0.00590111	0.00148082	0.00788266	0.00198837	0.237415	0.0182094	0.000635368	0.000438043	0.542075	0.00421409	0.0112769	0.00685486	0.00187028	0.000780652	0.0187394	0.000531265	0.0889418	0.00209568	0.00244743
FCA_GND8103049_AAATGCCGTCAGAATA	0.00198085	0.00179943	0.182593	0.0174179	0.00310848	0.0160653	0.000836684	0.240845	0.0331125	0.00023718	0.000182914	0.411469	0.00444047	0.0325011	0.0274386	0.00173926	0.000333676	0.0130109	0.000277148	0.00770124	0.00149149	0.00141697
FCA_GND8103049_AAATGCCGTGTTGGGA	0.00158059	0.00123557	0.0226382	0.0126995	0.00371106	0.0136817	0.00381151	0.591528	0.0548523	0.000291299	0.000208372	0.201623	0.00394887	0.0152026	0.019093	0.00335993	0.000669014	0.033663	0.000320531	0.0101103	0.0026179	0.0031545
FCA_GND8103049_AAATGCCTCAGCTGGC	0.0026845	0.00236721	0.0370398	0.0205354	0.0103154	0.0215527	0.00385558	0.449774	0.0677475	0.0012025	0.000598025	0.266195	0.00965021	0.0704558	0.00454432	0.00275959	0.00091487	0.017027	0.000685886	0.00702146	0.00165003	0.00142316
FCA_GND8103049_AACACGTCAAAGGCGT	0.00162523	0.000508833	0.00429859	0.0218166	0.00200469	0.0281077	0.000453596	0.575313	0.196424	0.000372261	0.000280522	0.139725	0.00618847	0.00126779	0.00072851	0.00146276	0.000485613	0.00348352	0.000297835	0.014287	0.000466294	0.000401776
FCA_GND8103049_AACACGTCACCAGCAC	0.00011955	0.000159559	8.85766e-05	0.0440532	0.000129026	0.00859132	0.000916464	0.000358417	0.00243441	0.000342491	0.000179607	0.000101113	0.00237857	8.83969e-05	0.000243733	0.936434	0.00152293	0.000184576	7.30994e-05	0.000730613	0.000574608	0.000295805
FCA_GND8103049_AACACGTCATGATCCA	0.000271645	0.000142149	0.000120632	0.221874	0.000345965	0.00197597	0.0035733	0.00134375	0.00886258	0.000116123	0.000103243	0.000164129	0.063213	0.000173117	0.00022387	0.694416	0.000287976	0.00033108	7.78411e-05	0.00191765	0.000303537	0.000161976
FCA_GND8103049_AACACGTGTGAGGCTA	0.000130366	8.47131e-05	0.0012579	0.001885	0.000402713	0.00985332	0.000625051	0.947727	0.0154139	8.71727e-05	7.02811e-05	0.00995682	0.00383131	0.00142388	0.00113323	0.000512064	0.000115396	0.00466883	5.99079e-05	0.000584578	8.38464e-05	9.30256e-05
FCA_GND8103049_AACACGTTCAGTCCCT	0.000530226	0.00156025	0.0114255	0.00345491	0.000721982	0.00202935	0.000668465	0.0239222	0.00589611	0.000361464	0.000204668	0.0473517	0.00237111	0.481276	0.405448	0.000464633	0.000310778	0.00941914	0.000221062	0.00158372	0.000485135	0.000294361
FCA_GND8103049_AACCATGAGCCACCTG	0.00286935	0.00384531	0.00644403	0.0766646	0.00771107	0.0482333	0.00137922	0.156049	0.421788	0.000939807	0.000779971	0.208003	0.00395932	0.00259317	0.00195686	0.013859	0.00115067	0.00419295	0.000771104	0.0331209	0.00233188	0.00135725
FCA_GND8103049_AACCATGAGGCGATAC	3.34529e-05	8.98189e-05	0.000407806	0.000515507	0.000194363	0.0045335	5.78468e-05	0.000698938	0.00339171	7.50147e-05	1.61862e-05	0.00417199	0.000158297	0.984497	0.000324794	5.26212e-05	1.60922e-05	0.000386873	2.34617e-05	0.000318294	1.96107e-05	1.68159e-05
FCA_GND8103049_AACCATGAGGCGCTCT	0.00213943	0.00167738	0.015751	0.00860704	0.00331482	0.078779	0.00167749	0.377638	0.150003	0.00076068	0.000622084	0.273528	0.0066741	0.0354766	0.00807901	0.00406728	0.00114174	0.0171772	0.000769081	0.00679773	0.00269314	0.0026259
FCA_GND8103049_AACCATGCAGACAAAT	0.00353647	0.00346379	0.145455	0.00950151	0.00562299	0.00649612	0.0105685	0.0909682	0.0328233	0.000937056	0.000548592	0.607383	0.0054057	0.0562873	0.00450162	0.00198068	0.000789154	0.00851893	0.000629439	0.00225454	0.00153152	0.000796782
FCA_GND8103049_AACCATGGTCCAAGTT	4.53746e-05	6.30899e-05	2.54239e-05	0.0514456	5.62749e-05	0.000648341	0.000373832	0.000317572	0.00977147	0.000135957	4.59676e-05	4.09388e-05	0.0056239	2.68773e-05	8.68181e-05	0.930881	5.11917e-05	0.000106978	2.50841e-05	0.000157216	4.73252e-05	2.33269e-05
FCA_GND8103049_AACCATGGTCTAGTCA	0.00205824	0.00213156	0.120158	0.0194931	0.0034918	0.0149173	0.00399348	0.205959	0.0684451	0.000470359	0.000338268	0.489576	0.00342771	0.0153553	0.0155132	0.00257203	0.000784815	0.0182293	0.00046768	0.00793879	0.0027651	0.0019137
FCA_GND8103049_AACCATGGTTAAAGAC	0.00167324	0.00082102	0.0116079	0.00570188	0.00435163	0.00972372	0.00237772	0.696169	0.0191409	0.000270223	0.000158898	0.191725	0.00177141	0.00854607	0.00618196	0.0019312	0.000498081	0.0222922	0.000392655	0.00471896	0.00554623	0.00440071
FCA_GND8103049_AACCATGTCACTGGGC	0.00222702	0.00158752	0.00540134	0.0276354	0.00488192	0.0248723	0.00463508	0.114365	0.623201	0.00105675	0.000900271	0.136578	0.0122839	0.0033575	0.00241625	0.00508211	0.00146423	0.0127583	0.000913956	0.0108165	0.00219786	0.0013677
FCA_GND8103049_AACCGCGCAAACGCGA	1.61262e-05	8.09735e-06	3.72399e-05	0.000100803	0.000149006	0.00107344	4.75726e-05	0.000116626	0.000307181	0.000275492	9.21079e-06	0.0232573	0.000114576	0.97375	7.4594e-05	2.38184e-05	7.22159e-06	0.000122121	3.53428e-06	0.000492129	7.94066e-06	5.81233e-06
FCA_GND8103049_AACCGCGCACGAAACG	0.0038087	0.00195165	0.00824346	0.0161875	0.00835822	0.0142425	0.145151	0.669216	0.0145576	0.00140437	0.00128423	0.0213972	0.00960208	0.00989992	0.0206256	0.00257129	0.00177604	0.0289837	0.00142905	0.0150487	0.00209467	0.00216639
FCA_GND8103049_AACCGCGCATCGATGT	0.0021464	0.00298808	0.0102826	0.00303133	0.00322582	0.0324957	0.00252837	0.130642	0.327077	0.000956933	0.00386039	0.42924	0.0088596	0.0156682	0.0046697	0.00502628	0.00140445	0.00843425	0.00147649	0.0020904	0.00219832	0.00169728
FCA_GND8103049_AACCGCGGTACCTACA	0.00327601	0.00178116	0.0612858	0.0198932	0.0102665	0.017192	0.00425066	0.337732	0.0369775	0.000492368	0.000274305	0.428272	0.00208356	0.0109633	0.00896951	0.00217147	0.00089057	0.0369486	0.000383557	0.0107948	0.00320529	0.00189588
FCA_GND8103049_AACCGCGGTCGAATCT	0.00261657	0.000962801	0.0808456	0.0074104	0.00263702	0.0133095	0.00177456	0.447406	0.0194279	0.000232571	0.000170261	0.317905	0.00269877	0.0280427	0.0221281	0.00225176	0.000479626	0.0352283	0.00031004	0.00840078	0.00216429	0.00359735
FCA_GND8103049_AACCGCGTCCGGCACA	0.00270275	0.000406261	0.0121873	0.00536201	0.00131048	0.0111342	0.000694198	0.145711	0.0261421	0.000236871	0.000133999	0.753749	0.00272376	0.00919774	0.00398002	0.000432523	0.000298147	0.0144752	0.000188778	0.00603416	0.00218139	0.000718047
FCA_GND8103049_AACCGCGTCTAGAGTC	0.00819081	0.00701863	0.0127118	0.0404851	0.0157313	0.0449956	0.0188955	0.041039	0.0889251	0.00604104	0.00460516	0.182528	0.0261433	0.364205	0.0205361	0.0300854	0.00559577	0.038863	0.00502093	0.0259076	0.0064523	0.00602392
FCA_GND8103049_AACGTTGAGTGTGGCA	0.0402997	0.00308778	0.0455251	0.00487571	0.0060422	0.00605297	0.00364539	0.026323	0.00423504	0.00207333	0.0014807	0.0673328	0.00361562	0.0135702	0.00846734	0.00243587	0.00249935	0.0126022	0.0016701	0.463696	0.00983793	0.270631
FCA_GND8103049_AACGTTGCAGTGAGTG	0.000375495	0.000226468	0.000341739	0.00623769	0.000699716	0.000427695	0.00076633	0.00109913	0.00242619	9.97267e-05	6.65321e-05	0.000370568	0.0376205	0.00020872	0.000602052	0.944987	0.000177481	0.00107224	5.32995e-05	0.00188108	0.000196753	6.33362e-05
FCA_GND8103049_AACGTTGGTACATCCA	0.000164109	0.00030847	9.0517e-05	0.180586	0.000355707	0.00133452	0.000608297	0.000397406	0.00533664	0.000152796	0.000226248	0.000155637	0.00927068	0.0001201	0.000114692	0.799214	0.000126151	0.000458586	9.68258e-05	0.000520023	0.000270097	9.23164e-05
FCA_GND8103049_AACGTTGGTAGTAGTA	0.00219155	0.000917113	0.120029	0.00918927	0.00329865	0.0150335	0.00130413	0.280882	0.0171819	0.000469323	0.000255194	0.462315	0.00225643	0.0285309	0.00798476	0.00121786	0.000525346	0.0255555	0.000368516	0.017084	0.00135474	0.00205558
FCA_GND8103049_AACGTTGGTGACGGTA	0.000949497	0.000604074	0.00221085	0.00473248	0.00355396	0.00425207	0.0018775	0.794134	0.0135725	0.000503854	0.000298372	0.0998772	0.00429825	0.00608902	0.00378346	0.00114013	0.000887369	0.0500155	0.000790578	0.00146628	0.00340291	0.00155996
FCA_GND8103049_AACGTTGGTTGGAGGT	0.00452018	0.00257018	0.0159012	0.0126651	0.00400482	0.114143	0.00174075	0.477121	0.243751	0.000938144	0.00082604	0.0714434	0.00936875	0.0111713	0.00288616	0.00345072	0.00151399	0.00609054	0.000971545	0.00671931	0.00535819	0.00284447
FCA_GND8103049_AACGTTGTCTGCTGTC	0.00325641	0.0025745	0.00898548	0.00773114	0.00803118	0.00647119	0.00560446	0.42519	0.0118119	0.0015482	0.00119714	0.276457	0.00529803	0.114409	0.00930972	0.00273532	0.00168158	0.0973982	0.00132645	0.00435518	0.00278358	0.00184453
FCA_GND8103049_AACGTTGTCTGTCCGT	0.00216272	0.0017844	0.0101301	0.0472033	0.00920376	0.0493008	0.00809106	0.114346	0.612151	0.00141432	0.000769616	0.0793011	0.00922605	0.00391174	0.00201612	0.00812253	0.00134576	0.00675077	0.000826427	0.0295608	0.00125732	0.00112429
FCA_GND8103049_AACTCAGCACCAACCG	4.32024e-05	2.55321e-05	5.35197e-06	0.975543	1.79362e-05	6.4412e-05	0.00183057	7.32245e-05	0.000908691	2.03002e-05	0.000223128	6.75531e-06	0.000667083	7.03515e-06	8.32155e-06	0.0201826	0.00012431	9.89874e-06	1.37023e-05	0.000134235	5.23893e-05	3.79266e-05
FCA_GND8103049_AACTCAGCACGAAATA	0.0010594	6.41866e-05	0.000210182	0.000147802	7.6186e-05	0.00230646	7.62632e-05	0.000187143	0.00133447	0.00023112	0.000147204	0.000465506	8.5764e-05	0.000112935	0.000330938	4.89833e-05	0.00110525	7.0565e-05	0.000116779	0.0938375	0.0119179	0.886067
FCA_GND8103049_AACTCAGCACTTCTGC	0.00862162	0.00276334	0.16286	0.0168715	0.00298818	0.0139456	0.000828594	0.117022	0.0205231	0.000457387	0.000362655	0.129601	0.0106377	0.400561	0.0811822	0.0019725	0.000478162	0.0103741	0.000458119	0.013768	0.00103179	0.0026914
FCA_GND8103049_AACTCAGGTCAGAATA	0.000679354	0.000785402	0.000897566	0.00606134	0.00189307	0.013535	0.00444481	0.005488	0.0632462	0.00171122	0.000413029	0.172885	0.0040306	0.694031	0.00158238	0.0018829	0.000509466	0.00865853	0.000404659	0.0157317	0.000653186	0.000476037
FCA_GND8103049_AACTCAGGTCCAAGTT	0.00104821	0.00172433	0.00516913	0.0369331	0.00745591	0.0208507	0.0118817	0.516399	0.247336	0.000425129	0.000360556	0.0769036	0.00803476	0.00679483	0.0146782	0.00590878	0.00135105	0.0194331	0.000377676	0.0117315	0.00229999	0.00290302
FCA_GND8103049_AACTCAGGTCGAGATG	0.0011306	0.00098261	0.0126294	0.00538413	0.00251279	0.00443959	0.00124574	0.14043	0.0109181	0.000309427	0.000182772	0.274127	0.00240846	0.504317	0.0115377	0.000667338	0.00028547	0.0226366	0.000217433	0.00262722	0.000676484	0.000334493
FCA_GND8103049_AACTCAGGTCTTTCAT	0.00317554	0.00150089	0.100875	0.0184751	0.0032818	0.0280946	0.00284927	0.178556	0.0662204	0.000664037	0.000516015	0.517189	0.00467886	0.0315041	0.0155493	0.00274154	0.00118641	0.00942348	0.000635893	0.00882357	0.00185414	0.00220499
FCA_GND8103049_AACTCAGTCATGCTCC	0.00166815	0.0025729	0.0212836	0.00495313	0.00500294	0.00838887	0.00790487	0.389881	0.111818	0.000681048	0.000539705	0.374168	0.0064006	0.0148434	0.0139974	0.00216224	0.00128217	0.0199465	0.00065935	0.00775484	0.00222276	0.00186831
FCA_GND8103049_AACTCAGTCCAGAAGG	0.0100139	0.000918178	0.033503	0.0103283	0.00259647	0.0319223	0.00146046	0.332637	0.0446982	0.000518617	0.000338081	0.437965	0.00400167	0.00782197	0.0191848	0.00108636	0.000769028	0.0279659	0.000420032	0.0273369	0.00215533	0.0023595
FCA_GND8103049_AACTCAGTCGTAGATC	0.00176621	0.00084912	0.00787485	0.0403032	0.00398596	0.00982474	0.0141807	0.670806	0.107927	0.000377802	0.000320635	0.0738769	0.00638917	0.00554476	0.0162454	0.0019458	0.000561774	0.0275537	0.000353662	0.0077039	0.000833289	0.000775478
FCA_GND8103049_AACTCAGTCTTTCCTC	0.00254373	0.00768566	0.30627	0.0259714	0.00284271	0.0207046	0.0249073	0.0362667	0.0624841	0.00085228	0.000655449	0.341845	0.00656433	0.0221975	0.116024	0.00433023	0.00115393	0.00637479	0.000794261	0.00513834	0.00238673	0.00200687
FCA_GND8103049_AACTCCCAGGATGCGT	0.00271436	0.000777569	0.00207708	0.0280711	0.00386275	0.0262301	0.00063729	0.61813	0.203988	0.0003684	0.000278938	0.0746182	0.00357124	0.00096464	0.000437209	0.00534767	0.000405846	0.00284529	0.000255953	0.0235416	0.000539624	0.000337458
FCA_GND8103049_AACTCCCCAGGTCCAC	0.0014058	0.00181737	0.0129303	0.023194	0.022499	0.0147525	0.00826373	0.659016	0.0371128	0.000688624	0.00060572	0.0579465	0.00399269	0.010102	0.00971179	0.0088625	0.00134212	0.113021	0.000716326	0.00477358	0.00392021	0.0033255
FCA_GND8103049_AACTCCCTCAGATAAG	0.002799	0.00141438	0.0964879	0.00669849	0.00204108	0.0146441	0.00132808	0.169893	0.0319365	0.000243182	0.000154674	0.620503	0.00215453	0.0163298	0.0123415	0.00138812	0.00038575	0.00883999	0.000215554	0.00729624	0.0013015	0.00160321
FCA_GND8103049_AACTCCCTCCAGAGGA	0.000445372	0.00044658	0.000407453	0.00187317	0.000604649	0.000491977	0.000272269	0.00158409	0.00469959	9.31935e-05	7.78218e-05	0.000546123	0.0162168	0.000259341	0.00103785	0.965854	0.000118958	0.00123995	0.000101228	0.00338562	0.00013113	0.000113164
FCA_GND8103049_AACTCCCTCTTCCTTC	0.00756719	0.00266978	0.0171743	0.0458878	0.00516367	0.0276877	0.00114274	0.169318	0.15355	0.000748024	0.000598335	0.514951	0.00658077	0.00248507	0.00143818	0.00639079	0.000737781	0.00397217	0.000664392	0.0290724	0.00128236	0.000917543
FCA_GND8103049_AACTCTTAGCCACTAT	0.0017143	0.00079036	0.0205164	0.0299533	0.00495014	0.035148	0.000553393	0.506596	0.234395	0.000347431	0.00027643	0.13737	0.00285821	0.00241105	0.000905971	0.00429675	0.000514018	0.00488353	0.000382797	0.00931416	0.0010093	0.000813882
FCA_GND8103049_AACTCTTAGCTGTTCA	0.000472032	0.000433656	0.000645117	0.0116115	0.00321619	0.0278202	0.00568697	0.00407374	0.0313721	0.000539288	0.000261919	0.0116126	0.00177926	0.87909	0.00856041	0.00621085	0.000457119	0.00273902	0.00023832	0.00236653	0.000483634	0.000329667
FCA_GND8103049_AACTCTTCAACTGGCC	0.00439523	0.0012557	0.0263396	0.0327837	0.00369066	0.0369468	0.00112148	0.181068	0.285463	0.000512934	0.000419801	0.374619	0.00842624	0.00376981	0.00186758	0.00227236	0.000744075	0.0129359	0.000412444	0.0192328	0.00109886	0.000624186
FCA_GND8103049_AACTCTTCACAGCGTC	4.94833e-05	4.23568e-05	0.000141601	0.00116757	0.000112364	0.965948	0.000101308	0.000616484	0.0259338	0.00109767	6.32507e-05	0.00125525	0.000179403	0.00023026	0.000459462	5.70018e-05	0.00166498	0.000118414	4.66115e-05	0.000105882	0.000321247	0.000287301
FCA_GND8103049_AACTCTTGTCAAACTC	0.0221609	0.00328934	0.0381219	0.00810473	0.00420672	0.0124634	0.00500485	0.562387	0.0219271	0.00198829	0.00183713	0.162844	0.00870703	0.0234246	0.0197826	0.00365209	0.00255073	0.037624	0.00322339	0.0427867	0.00666308	0.00725028
FCA_GND8103049_AACTCTTGTCTAGGTT	0.00592133	0.00139819	0.00178595	0.611222	0.00533967	0.0518058	0.0199432	0.0101772	0.150104	0.00106724	0.000738381	0.0031625	0.0193123	0.00256536	0.00307963	0.0513009	0.00163633	0.00408628	0.000881893	0.0420914	0.00796975	0.00440981
FCA_GND8103049_AACTCTTGTTACAGAA	7.01243e-06	4.40464e-05	5.78377e-06	0.0215702	0.000184099	0.000199994	0.000354944	7.82014e-05	0.00157697	6.05247e-05	2.57215e-05	1.23184e-05	0.00995873	7.3852e-06	2.19763e-05	0.965498	4.27246e-05	0.000217992	3.06385e-05	7.78798e-05	1.69044e-05	7.87771e-06
FCA_GND8103049_AACTGGTAGAAGCCCA	0.00187508	0.000443295	0.00311552	0.00433887	0.00213189	0.0049481	0.0027598	0.852872	0.0110331	0.000250475	0.000166816	0.0692361	0.00408502	0.00362953	0.00529962	0.000550812	0.000294993	0.0285184	0.000186879	0.00340619	0.000364159	0.000493234
[truncated: 18,681 more rows]
