# Supplementary material for: Single-cell roadmap of human gonadal development
Source: Research Square preprint supplement (doi:10.21203/rs.3.rs-496470/v1), 2021-05-21
Supplement: Supplementary file 19 [file c83ae6bdad17c392906f65a0.xlsx]

## Sheet: novel_cellcell_interactions
partner_a	partner_b	protein_name_a	protein_name_b	annotation_strategy	source	is_ppi	curator	reactome_complex	reactome_reaction	reactome_pathway	complexPortal_complex	comments
Q9Y275	Q96RJ3	TN13B_HUMAN	TR13C_HUMAN	curated	uniprot;reactome	TRUE	JRodriguezUbreva	R-HSA-5676540	R-HSA-5676599	R-HSA-1280215
Ldopa_byTYR	P51810		GP143_HUMAN	curated	reactome;uniprot	FALSE	LGarciaAlonso	R-HSA-8851302	R-HSA-8851298
SerotoninDopamin_byDDC	A5X5Y0		5HT3E_HUMAN	curated	uniprot	FALSE	LGarciaAlonso
Acetylcholine_byCHAT	AcetylcholineReceptor_a2b3			curated	reactome	FALSE	LGarciaAlonso		R-HSA-629599
Acetylcholine_byCHAT	AcetylcholineReceptor_a3b2a5			curated	reactome	FALSE	LGarciaAlonso		R-HSA-629599
Acetylcholine_byCHAT	AcetylcholineReceptor_a3b4a5			curated	reactome	FALSE	LGarciaAlonso		R-HSA-629599
Acetylcholine_byCHAT	AcetylcholineReceptor_a4b2			curated	reactome	FALSE	LGarciaAlonso		R-HSA-629599
Acetylcholine_byCHAT	AcetylcholineReceptor_a6a4b3			curated	reactome	FALSE	LGarciaAlonso		R-HSA-629599
Acetylcholine_byCHAT	AcetylcholineReceptor_a6b3b4			curated	reactome	FALSE	LGarciaAlonso		R-HSA-629599
Progesterone_byHSD3B1	CatSperChannel1b			curated	uniprot;reactome	FALSE	LGarciaAlonso	R-HSA-2534353	R-HSA-2534388
Progesterone_byHSD3B1	CatSperChannel1dg			curated	uniprot;reactome	FALSE	LGarciaAlonso	R-HSA-2534353	R-HSA-2534388
Progesterone_byHSD3B1	CatSperChannel2b			curated	uniprot;reactome	FALSE	LGarciaAlonso	R-HSA-2534353	R-HSA-2534388
Progesterone_byHSD3B1	CatSperChannel2dg			curated	uniprot;reactome	FALSE	LGarciaAlonso	R-HSA-2534353	R-HSA-2534388
Progesterone_byHSD3B1	CatSperChannel3b			curated	uniprot;reactome	FALSE	LGarciaAlonso	R-HSA-2534353	R-HSA-2534388
Progesterone_byHSD3B1	CatSperChannel3dg			curated	uniprot;reactome	FALSE	LGarciaAlonso	R-HSA-2534353	R-HSA-2534388
Progesterone_byHSD3B1	CatSperChannel4b			curated	uniprot;reactome	FALSE	LGarciaAlonso	R-HSA-2534353	R-HSA-2534388
Progesterone_byHSD3B1	CatSperChannel4dg			curated	uniprot;reactome	FALSE	LGarciaAlonso	R-HSA-2534353	R-HSA-2534388
Dehydroepiandrosterone_bySTS	O75469		NR1I2_HUMAN	curated	HMRbase	FALSE	LGarciaAlonso
Estradiol_byCYP19A1	O75469		NR1I2_HUMAN	curated	HMRbase	FALSE	LGarciaAlonso
Estradiol_byHSD17B1	O75469		NR1I2_HUMAN	curated	HMRbase	FALSE	LGarciaAlonso
Pregnenolone_byCYP11A1	O75469		NR1I2_HUMAN	curated	HMRbase;uniprot	FALSE	LGarciaAlonso
SerotoninDopamin_byDDC	O95264		5HT3B_HUMAN	curated	uniprot	FALSE	LGarciaAlonso
Acetylcholine_byCHAT	P02708		ACHA_HUMAN	curated	reactome	FALSE	LGarciaAlonso		R-HSA-629596
Dehydroepiandrosterone_bySTS	P03372		ESR1_HUMAN	curated	HMRbase	FALSE	LGarciaAlonso
Estradiol_byCYP19A1	P03372		ESR1_HUMAN	curated	HMRbase;reactome	FALSE	LGarciaAlonso	R-HSA-9008284
Estradiol_byHSD17B1	P03372		ESR1_HUMAN	curated	HMRbase;reactome	FALSE	LGarciaAlonso	R-HSA-9008284
Aldosterone_Corticosterone_byCYP11B2	P04150		GCR_HUMAN	curated	HMRbase	FALSE	LGarciaAlonso
Corticosterone_byCYP11B1	P04150		GCR_HUMAN	curated	HMRbase	FALSE	LGarciaAlonso
5_alpha_Dihydroprogesterone_byDHRS9	P06401		PRGR_HUMAN	curated	HMRbase	FALSE	LGarciaAlonso
Progesterone_byHSD3B1	P06401		PRGR_HUMAN	curated	HMRbase	FALSE	LGarciaAlonso
Epinephrine_byPNMT	P07550		ADRB2_HUMAN	curated	reactome	FALSE	LGarciaAlonso	R-HSA-8852028	R-HSA-9611851	R-HSA-390696
Noradrenaline_byDBH	P07550		ADRB2_HUMAN	curated	HMRbase;reactome	FALSE	LGarciaAlonso	R-HSA-8852028	R-HSA-9611851	R-HSA-390696
Acetylcholine_byCHAT	P08172		ACM2_HUMAN	curated	reactome	FALSE	LGarciaAlonso		R-HSA-390673
Acetylcholine_byCHAT	P08173		ACM4_HUMAN	curated	reactome	FALSE	LGarciaAlonso		R-HSA-390673
Aldosterone_Corticosterone_byCYP11B2	P08235		MCR_HUMAN	curated	HMRbase;uniprot	FALSE	LGarciaAlonso
Corticosterone_byCYP11B1	P08235		MCR_HUMAN	curated	uniprot;PMID:3037703	FALSE	LGarciaAlonso
Desoxycorticosterone_byCYP21A2	P08235		MCR_HUMAN	curated	HMRbase;uniprot	FALSE	LGarciaAlonso
Epinephrine_byPNMT	P08588		ADRB1_HUMAN	curated	HMRbase;reactome	FALSE	LGarciaAlonso	R-HSA-390643	R-HSA-390674	R-HSA-390696
Noradrenaline_byDBH	P08588		ADRB1_HUMAN	curated	HMRbase;reactome	FALSE	LGarciaAlonso	R-HSA-390643	R-HSA-390674	R-HSA-390696
SerotoninDopamin_byDDC	P08908		5HT1A_HUMAN	curated	HMRbase;uniprot;reactome	FALSE	LGarciaAlonso		R-HSA-390929
Acetylcholine_byCHAT	P08912		ACM5_HUMAN	curated	reactome	FALSE	LGarciaAlonso		R-HSA-390649
Epinephrine_byPNMT	P08913		ADA2A_HUMAN	curated	reactome	FALSE	LGarciaAlonso	R-HSA-390700	R-HSA-390663	R-HSA-390696
Noradrenaline_byDBH	P08913		ADA2A_HUMAN	curated	reactome	FALSE	LGarciaAlonso	R-HSA-390700	R-HSA-390663
Androstenedione_byCYP17A1	P10275		ANDR_HUMAN	curated	HMRbase;reactome	FALSE	LGarciaAlonso	R-HSA-5618087
Dihydrotestosterone_bySRD5A1	P10275		ANDR_HUMAN	curated	HMRbase;uniprot	FALSE	LGarciaAlonso
Dihydrotestosterone_bySRD5A2	P10275		ANDR_HUMAN	curated	HMRbase;uniprot	FALSE	LGarciaAlonso
Dihydrotestosterone_bySRD5A3	P10275		ANDR_HUMAN	curated	HMRbase;uniprot	FALSE	LGarciaAlonso
Testosterone_byAKR1D1	P10275		ANDR_HUMAN	curated	HMRbase;uniprot	FALSE	LGarciaAlonso
Testosterone_byHSD17B12	P10275		ANDR_HUMAN	curated	HMRbase;uniprot	FALSE	LGarciaAlonso
Testosterone_byHSD17B3	P10275		ANDR_HUMAN	curated	HMRbase;uniprot	FALSE	LGarciaAlonso
Triiodothyronine_byDIO3	P10827		THA_HUMAN	curated	HMRbase;uniprot	FALSE	LGarciaAlonso
Lthyroxine_byTPO	P10828		THB_HUMAN	curated	HMRbase;uniprot	FALSE	LGarciaAlonso
Triiodothyronine_byDIO3	P10828		THB_HUMAN	curated	HMRbase;uniprot	FALSE	LGarciaAlonso
Acetylcholine_byCHAT	P11229		ACM1_HUMAN	curated	reactome	FALSE	LGarciaAlonso		R-HSA-390649
Calcitriol_byCYP27B1	P11473		VDR_HUMAN	curated	HMRbase;uniprot	FALSE	LGarciaAlonso
Epinephrine_byPNMT	P13945		ADRB3_HUMAN	curated	reactome	FALSE	LGarciaAlonso	R-HSA-9611853	R-HSA-9611852	R-HSA-390696
Noradrenaline_byDBH	P13945		ADRB3_HUMAN	curated	HMRbase;reactome	FALSE	LGarciaAlonso	R-HSA-9611853	R-HSA-9611852	R-HSA-390696
SerotoninDopamin_byDDC	P14416		DRD2_HUMAN	curated	uniprot;reactome	FALSE	LGarciaAlonso
Epinephrine_byPNMT	P18089		ADA2B_HUMAN	curated	reactome	FALSE	LGarciaAlonso	R-HSA-390700	R-HSA-390663	R-HSA-390696
Noradrenaline_byDBH	P18089		ADA2B_HUMAN	curated	reactome	FALSE	LGarciaAlonso	R-HSA-390700	R-HSA-390663
Epinephrine_byPNMT	P18825		ADA2C_HUMAN	curated	reactome	FALSE	LGarciaAlonso	R-HSA-390700	R-HSA-390663	R-HSA-390696
Noradrenaline_byDBH	P18825		ADA2C_HUMAN	curated	reactome	FALSE	LGarciaAlonso	R-HSA-390700	R-HSA-390663
Acetylcholine_byCHAT	P20309		ACM3_HUMAN	curated	reactome	FALSE	LGarciaAlonso		R-HSA-390649
2arachidonoylglycerol_byDAGLA	P21554		CNR1_HUMAN	curated	reactome	FALSE	LGarciaAlonso		R-HSA-419426
2arachidonoylglycerol_byDAGLB	P21554		CNR1_HUMAN	curated	reactome	FALSE	LGarciaAlonso		R-HSA-419426
SerotoninDopamin_byDDC	P21728		DRD1_HUMAN	curated	uniprot;reactome	FALSE	LGarciaAlonso
ThromboxaneA2_byTBXAS1	P21731		TA2R_HUMAN	curated	HMRbase;uniprot;reactome	FALSE	LGarciaAlonso		R-HSA-391939
SerotoninDopamin_byDDC	P21917		DRD4_HUMAN	curated	uniprot;reactome	FALSE	LGarciaAlonso
SerotoninDopamin_byDDC	P21918		DRD5_HUMAN	curated	uniprot;reactome	FALSE	LGarciaAlonso
Histamine_byHDC	P25021		HRH2_HUMAN	curated	uniprot;reactome	FALSE	LGarciaAlonso		R-HSA-390909
LipoxinA4_ALOX12	P25090		FPR2_HUMAN	curated	HMRbase;uniprot	FALSE	LGarciaAlonso
LipoxinA4_byALOX5	P25090		FPR2_HUMAN	curated	HMRbase;uniprot	FALSE	LGarciaAlonso
Epinephrine_byPNMT	P25100		ADA1D_HUMAN	curated	reactome	FALSE	LGarciaAlonso		R-HSA-390641
Noradrenaline_byDBH	P25100		ADA1D_HUMAN	curated	HMRbase;reactome	FALSE	LGarciaAlonso	R-HSA-390633	R-HSA-390641	R-HSA-390696
SerotoninDopamin_byDDC	P28221		5HT1D_HUMAN	curated	uniprot;reactome	FALSE	LGarciaAlonso		R-HSA-390929
SerotoninDopamin_byDDC	P28222		5HT1B_HUMAN	curated	uniprot;reactome	FALSE	LGarciaAlonso		R-HSA-390929
SerotoninDopamin_byDDC	P28223		5HT2A_HUMAN	curated	HMRbase;uniprot;reactome	FALSE	LGarciaAlonso		R-HSA-390930
SerotoninDopamin_byDDC	P28335		5HT2C_HUMAN	curated	HMRbase;uniprot;reactome	FALSE	LGarciaAlonso		R-HSA-390930
SerotoninDopamin_byDDC	P28566		5HT1E_HUMAN	curated	uniprot;reactome	FALSE	LGarciaAlonso		R-HSA-390929
SerotoninDopamin_byDDC	P30939		5HT1F_HUMAN	curated	uniprot;reactome	FALSE	LGarciaAlonso		R-HSA-390929
SerotoninDopamin_byDDC	P34969		5HT7R_HUMAN	curated	uniprot;reactome	FALSE	LGarciaAlonso		R-HSA-390931
2arachidonoylglycerol_byDAGLA	P34972		CNR2_HUMAN	curated	reactome	FALSE	LGarciaAlonso		R-HSA-419426
2arachidonoylglycerol_byDAGLB	P34972		CNR2_HUMAN	curated	reactome	FALSE	LGarciaAlonso		R-HSA-419426
ProstaglandinE2_byPTGES	P34995		PE2R1_HUMAN	curated	HMRbase;reactome;uniprot	FALSE	LGarciaAlonso	R-HSA-391920	R-HSA-391936
ProstaglandinE2_byPTGES2	P34995		PE2R1_HUMAN	curated	HMRbase;reactome;uniprot	FALSE	LGarciaAlonso	R-HSA-391920	R-HSA-391936
ProstaglandinE2_byPTGES3	P34995		PE2R1_HUMAN	curated	HMRbase;reactome;uniprot	FALSE	LGarciaAlonso	R-HSA-391920	R-HSA-391936
Epinephrine_byPNMT	P35348		ADA1A_HUMAN	curated	reactome	FALSE	LGarciaAlonso		R-HSA-390641
Noradrenaline_byDBH	P35348		ADA1A_HUMAN	curated	HMRbase;reactome	FALSE	LGarciaAlonso	R-HSA-390633	R-HSA-390641	R-HSA-390696
Histamine_byHDC	P35367		HRH1_HUMAN	curated	uniprot;reactome	FALSE	LGarciaAlonso		R-HSA-390912
Epinephrine_byPNMT	P35368		ADA1B_HUMAN	curated	reactome	FALSE	LGarciaAlonso		R-HSA-390641
Noradrenaline_byDBH	P35368		ADA1B_HUMAN	curated	HMRbase;reactome	FALSE	LGarciaAlonso	R-HSA-390633	R-HSA-390641	R-HSA-390696
Cholesterol_byCEL	P35398		RORA_HUMAN	curated	HMRbase;PMID:12467577;PDB:1N83	FALSE	LGarciaAlonso
Cholesterol_byDHCR24	P35398		RORA_HUMAN	curated	HMRbase;PMID:12467577;PDB:1N83	FALSE	LGarciaAlonso
Cholesterol_byDHCR7	P35398		RORA_HUMAN	curated	HMRbase;PMID:12467577;PDB:1N83	FALSE	LGarciaAlonso
Cholesterol_byLIPA	P35398		RORA_HUMAN	curated	HMRbase;PMID:12467577;PDB:1N83	FALSE	LGarciaAlonso
ProstaglandinE2_byPTGES	P35408		PE2R4_HUMAN	curated	HMRbase;uniprot	FALSE	LGarciaAlonso
ProstaglandinE2_byPTGES2	P35408		PE2R4_HUMAN	curated	HMRbase;uniprot	FALSE	LGarciaAlonso
ProstaglandinE2_byPTGES3	P35408		PE2R4_HUMAN	curated	HMRbase;uniprot	FALSE	LGarciaAlonso
SerotoninDopamin_byDDC	P35462		DRD3_HUMAN	curated	uniprot;reactome	FALSE	LGarciaAlonso
Acetylcholine_byCHAT	P36544		ACHA7_HUMAN	curated	reactome	FALSE	LGarciaAlonso		R-HSA-629596
DHEAsulfate_bySULT1E1	P37231		PPARG_HUMAN	curated	HMRbase	FALSE	LGarciaAlonso
DHEAsulfate_bySULT2A1	P37231		PPARG_HUMAN	curated	HMRbase	FALSE	LGarciaAlonso
DHEAsulfate_bySULT2B	P37231		PPARG_HUMAN	curated	HMRbase	FALSE	LGarciaAlonso
SerotoninDopamin_byDDC	P41595		5HT2B_HUMAN	curated	uniprot;reactome	FALSE	LGarciaAlonso		R-HSA-390930
ProstaglandinF2a_byAKR1B1	P43088		PF2R_HUMAN	curated	HMRbase;uniprot;reactome	FALSE	LGarciaAlonso		R-HSA-416929
ProstaglandinF2a_byCBR1	P43088		PF2R_HUMAN	curated	HMRbase;uniprot;reactome	FALSE	LGarciaAlonso		R-HSA-416929
ProstaglandinF2a_byPRXL2B	P43088		PF2R_HUMAN	curated	HMRbase;uniprot;reactome	FALSE	LGarciaAlonso		R-HSA-416929
ProstaglandinE2_byPTGES	P43115		PE2R3_HUMAN	curated	HMRbase;uniprot	FALSE	LGarciaAlonso
ProstaglandinE2_byPTGES2	P43115		PE2R3_HUMAN	curated	HMRbase;uniprot	FALSE	LGarciaAlonso
ProstaglandinE2_byPTGES3	P43115		PE2R3_HUMAN	curated	HMRbase;uniprot	FALSE	LGarciaAlonso
ProstaglandinE2_byPTGES	P43116		PE2R2_HUMAN	curated	HMRbase;uniprot	FALSE	LGarciaAlonso
ProstaglandinE2_byPTGES2	P43116		PE2R2_HUMAN	curated	HMRbase;uniprot	FALSE	LGarciaAlonso
ProstaglandinE2_byPTGES3	P43116		PE2R2_HUMAN	curated	HMRbase;uniprot	FALSE	LGarciaAlonso
Prostacyclin_byPTGIS	P43119		PI2R_HUMAN	curated	HMRbase;uniprot;reactome	FALSE	LGarciaAlonso		R-HSA-391942
SerotoninDopamin_byDDC	P46098		5HT3A_HUMAN	curated	HMRbase;uniprot	FALSE	LGarciaAlonso
SerotoninDopamin_byDDC	P47898		5HT5A_HUMAN	curated	HMRbase;uniprot;reactome	FALSE	LGarciaAlonso		R-HSA-390929
Melatonin_byASMT	P48039		MTR1A_HUMAN	curated	uniprot;reactome	FALSE	LGarciaAlonso	R-HSA-419365	R-HSA-419334
Melatonin_byASMT	P49286		MTR1B_HUMAN	curated	uniprot;reactome	FALSE	LGarciaAlonso	R-HSA-419365	R-HSA-419334
SerotoninDopamin_byDDC	P50406		5HT6R_HUMAN	curated	uniprot;reactome	FALSE	LGarciaAlonso		R-HSA-390931
Cholesterol_byCEL	P51449		RORG_HUMAN	curated	uniprot	FALSE	LGarciaAlonso
Cholesterol_byDHCR24	P51449		RORG_HUMAN	curated	uniprot	FALSE	LGarciaAlonso
Cholesterol_byDHCR7	P51449		RORG_HUMAN	curated	uniprot	FALSE	LGarciaAlonso
Cholesterol_byLIPA	P51449		RORG_HUMAN	curated	uniprot	FALSE	LGarciaAlonso
Desmosterol_byDHCR7	P55055		NR1H2_HUMAN	curated	HMRbase;uniprot	FALSE	LGarciaAlonso
DHEAsulfate_bySULT1E1	Q03181		PPARD_HUMAN	curated	HMRbase	FALSE	LGarciaAlonso
DHEAsulfate_bySULT2A1	Q03181		PPARD_HUMAN	curated	HMRbase	FALSE	LGarciaAlonso
DHEAsulfate_bySULT2B	Q03181		PPARD_HUMAN	curated	HMRbase	FALSE	LGarciaAlonso
Dehydroepiandrosterone_bySTS	Q07869		PPARA_HUMAN	curated	HMRbase;PMID:18079279	FALSE	LGarciaAlonso
DHEAsulfate_bySULT1E1	Q07869		PPARA_HUMAN	curated	HMRbase	FALSE	LGarciaAlonso
DHEAsulfate_bySULT2A1	Q07869		PPARA_HUMAN	curated	HMRbase	FALSE	LGarciaAlonso
DHEAsulfate_bySULT2B	Q07869		PPARA_HUMAN	curated	HMRbase	FALSE	LGarciaAlonso
Desmosterol_byDHCR7	Q13133		NR1H3_HUMAN	curated	HMRbase	FALSE	LGarciaAlonso
ProstaglandinD2_byAKR1C3	Q13258		PD2R_HUMAN	curated	HMRbase;uniprot;reactome	FALSE	LGarciaAlonso	R-HSA-416920	R-HSA-391935
LeukotrieneB4_byLTA4H	Q13304		GPR17_HUMAN	curated	uniprot;reactome	FALSE	LGarciaAlonso		R-HSA-391937
LeukotrieneC4_byLTC4S	Q13304		GPR17_HUMAN	curated	uniprot;reactome	FALSE	LGarciaAlonso		R-HSA-391937
LeukotrieneD4_byGGT1	Q13304		GPR17_HUMAN	curated	uniprot;reactome	FALSE	LGarciaAlonso		R-HSA-391937
SerotoninDopamin_byDDC	Q13639		5HT4R_HUMAN	curated	HMRbase;uniprot;reactome	FALSE	LGarciaAlonso		R-HSA-390931
12oxoLeukotrieneB4_byPTGR1	Q15722		LT4R1_HUMAN	curated	HMRbase;uniprot;reactome	FALSE	LGarciaAlonso	R-HSA-416435	R-HSA-391941
LeukotrieneB4_byLTA4H	Q15722		LT4R1_HUMAN	curated	HMRbase;uniprot;reactome	FALSE	LGarciaAlonso		R-HSA-391941
SerotoninDopamin_byDDC	Q70Z44		5HT3D_HUMAN	curated	uniprot	FALSE	LGarciaAlonso
5S_HpETE_byALOX5	Q8TDS5		OXER1_HUMAN	curated	HMRbase;uniprot	FALSE	LGarciaAlonso		R-HSA-391905
SerotoninDopamin_byDDC	Q8WXA8		5HT3C_HUMAN	curated	uniprot	FALSE	LGarciaAlonso
Estradiol_byCYP19A1	P03372		ESR1_HUMAN	curated	HMRbase	FALSE	LGarciaAlonso
Estradiol_byCYP19A1	Q92731		ESR2_HUMAN	curated	HMRbase	FALSE	LGarciaAlonso
Estradiol_byHSD17B1	Q92731		ESR2_HUMAN	curated	HMRbase	FALSE	LGarciaAlonso
atRetinoicAcid_byALDH1A1	Q92753		RORB_HUMAN	curated	uniprot	FALSE	LGarciaAlonso
atRetinoicAcid_byALDH1A2	Q92753		RORB_HUMAN	curated	uniprot	FALSE	LGarciaAlonso
atRetinoicAcid_byALDH1A3	Q92753		RORB_HUMAN	curated	uniprot	FALSE	LGarciaAlonso
22Hydroxycholesterol_byCYP11A1	Q96RI1		NR1H4_HUMAN	curated	HMRbase;uniprot	FALSE	LGarciaAlonso
22Hydroxycholesterol_byCYP3A4	Q96RI1		NR1H4_HUMAN	curated	HMRbase;uniprot	FALSE	LGarciaAlonso
Androsterone_byHSD17B6	Q96RI1		NR1H4_HUMAN	curated	HMRbase	FALSE	LGarciaAlonso
Estradiol_byCYP19A1	Q99527		GPER1_HUMAN	curated	reactome;uniprot	FALSE	LGarciaAlonso		R-HSA-374207
Estradiol_byHSD17B1	Q99527		GPER1_HUMAN	curated	reactome;uniprot	FALSE	LGarciaAlonso		R-HSA-374207
Histamine_byHDC	Q9H3N8		HRH4_HUMAN	curated	uniprot;reactome	FALSE	LGarciaAlonso		R-HSA-390886
12oxoLeukotrieneB4_byPTGR1	Q9NPC1		LT4R2_HUMAN	curated	HMRbase;uniprot;reactome	FALSE	LGarciaAlonso	R-HSA-416435	R-HSA-391941
LeukotrieneB4_byLTA4H	Q9NPC1		LT4R2_HUMAN	curated	HMRbase;uniprot;reactome	FALSE	LGarciaAlonso		R-HSA-391941
LeukotrieneC4_byLTC4S	Q9NS75		CLTR2_HUMAN	curated	HMRbase;uniprot;reactome	FALSE	LGarciaAlonso		R-HSA-391943
LeukotrieneD4_byGGT1	Q9NS75		CLTR2_HUMAN	curated	HMRbase;uniprot;reactome	FALSE	LGarciaAlonso		R-HSA-391943
LeukotrieneC4_byLTC4S	Q9Y271		CLTR1_HUMAN	curated	HMRbase;uniprot;reactome	FALSE	LGarciaAlonso		R-HSA-391943
LeukotrieneD4_byGGT1	Q9Y271		CLTR1_HUMAN	curated	HMRbase;uniprot;reactome	FALSE	LGarciaAlonso		R-HSA-391943
LeukotrieneE4_byDPEP1	Q9Y271		CLTR1_HUMAN	curated	HMRbase;uniprot;reactome	FALSE	LGarciaAlonso		R-HSA-391943
LeukotrieneE4_byDPEP2	Q9Y271		CLTR1_HUMAN	curated	HMRbase;uniprot;reactome	FALSE	LGarciaAlonso		R-HSA-391943
LeukotrieneE4_byDPEP3	Q9Y271		CLTR1_HUMAN	curated	HMRbase;uniprot;reactome	FALSE	LGarciaAlonso		R-HSA-391943
LipoxinA4_ALOX12	Q9Y271		CLTR1_HUMAN	curated	HMRbase	FALSE	LGarciaAlonso
LipoxinA4_byALOX5	Q9Y271		CLTR1_HUMAN	curated	HMRbase	FALSE	LGarciaAlonso
2arachidonoylglycerol_byDAGLA	Q9Y2T6		GPR55_HUMAN	curated	reactome	FALSE	LGarciaAlonso		R-HSA-419426
2arachidonoylglycerol_byDAGLB	Q9Y2T6		GPR55_HUMAN	curated	reactome	FALSE	LGarciaAlonso		R-HSA-419426
Histamine_byHDC	Q9Y5N1		HRH3_HUMAN	curated	uniprot;reactome	FALSE	LGarciaAlonso		R-HSA-390886
ProstaglandinD2_byAKR1C3	Q9Y5Y4		PD2R2_HUMAN	curated	uniprot;reactome	FALSE	LGarciaAlonso	R-HSA-416875	R-HSA-391934
atRetinoicAcid_byALDH1A1	RAreceptor_RXRA			curated	uniprot;reactome	FALSE	LGarciaAlonso
atRetinoicAcid_byALDH1A1	RAreceptor_RXRB			curated	uniprot;reactome	FALSE	LGarciaAlonso
atRetinoicAcid_byALDH1A1	RAreceptor_RXRG			curated	uniprot;reactome	FALSE	LGarciaAlonso
atRetinoicAcid_byALDH1A1	RAreceptor_RARA			curated	uniprot;reactome	FALSE	LGarciaAlonso
atRetinoicAcid_byALDH1A1	RAreceptor_RARB			curated	uniprot;reactome	FALSE	LGarciaAlonso
atRetinoicAcid_byALDH1A1	RAreceptor_RARG			curated	uniprot;reactome	FALSE	LGarciaAlonso
atRetinoicAcid_byALDH1A2	RAreceptor_RXRA			curated	uniprot;reactome	FALSE	LGarciaAlonso
atRetinoicAcid_byALDH1A2	RAreceptor_RXRB			curated	uniprot;reactome	FALSE	LGarciaAlonso
atRetinoicAcid_byALDH1A2	RAreceptor_RXRG			curated	uniprot;reactome	FALSE	LGarciaAlonso
atRetinoicAcid_byALDH1A2	RAreceptor_RARA			curated	uniprot;reactome	FALSE	LGarciaAlonso
atRetinoicAcid_byALDH1A2	RAreceptor_RARB			curated	uniprot;reactome	FALSE	LGarciaAlonso
atRetinoicAcid_byALDH1A2	RAreceptor_RARG			curated	uniprot;reactome	FALSE	LGarciaAlonso
atRetinoicAcid_byALDH1A3	RAreceptor_RXRA			curated	uniprot;reactome	FALSE	LGarciaAlonso
atRetinoicAcid_byALDH1A3	RAreceptor_RXRB			curated	uniprot;reactome	FALSE	LGarciaAlonso
atRetinoicAcid_byALDH1A3	RAreceptor_RXRG			curated	uniprot;reactome	FALSE	LGarciaAlonso
atRetinoicAcid_byALDH1A3	RAreceptor_RARA			curated	uniprot;reactome	FALSE	LGarciaAlonso
atRetinoicAcid_byALDH1A3	RAreceptor_RARB			curated	uniprot;reactome	FALSE	LGarciaAlonso
atRetinoicAcid_byALDH1A3	RAreceptor_RARG			curated	uniprot;reactome	FALSE	LGarciaAlonso
atRetinoicAcid_byALDH1A1	RAreceptor_RARA_RXRA			curated	uniprot;reactome	FALSE	LGarciaAlonso		R-HSA-5334854
atRetinoicAcid_byALDH1A2	RAreceptor_RARA_RXRA			curated	uniprot;reactome	FALSE	LGarciaAlonso		R-HSA-5334854
atRetinoicAcid_byALDH1A3	RAreceptor_RARA_RXRA			curated	uniprot;reactome	FALSE	LGarciaAlonso		R-HSA-5334854
atRetinoicAcid_byALDH1A1	RAreceptor_RARB_RXRB			curated	uniprot;reactome	FALSE	LGarciaAlonso		R-HSA-5334854
atRetinoicAcid_byALDH1A2	RAreceptor_RARB_RXRB			curated	uniprot;reactome	FALSE	LGarciaAlonso		R-HSA-5334854
atRetinoicAcid_byALDH1A3	RAreceptor_RARB_RXRB			curated	uniprot;reactome	FALSE	LGarciaAlonso		R-HSA-5334854
atRetinoicAcid_byALDH1A1	RAreceptor_RARG_RXRG			curated	uniprot;reactome	FALSE	LGarciaAlonso		R-HSA-5334854
atRetinoicAcid_byALDH1A2	RAreceptor_RARG_RXRG			curated	uniprot;reactome	FALSE	LGarciaAlonso		R-HSA-5334854
atRetinoicAcid_byALDH1A3	RAreceptor_RARG_RXRG			curated	uniprot;reactome	FALSE	LGarciaAlonso		R-HSA-5334854
Q9ULB5	Q9ULB5	CADH7_HUMAN	CADH7_HUMAN	curated	uniprot	TRUE	LGarciaAlonso
P55285	P55285	CADH6_HUMAN	CADH6_HUMAN	curated	uniprot	TRUE	LGarciaAlonso
P33151	P33151	CADH5_HUMAN	CADH5_HUMAN	curated	uniprot	TRUE	LGarciaAlonso
P22223	P22223	CADH3_HUMAN	CADH3_HUMAN	curated	uniprot	TRUE	LGarciaAlonso
P19022	P19022	CADH2_HUMAN	CADH2_HUMAN	curated	uniprot	TRUE	LGarciaAlonso
O95715	P61073	CXL14_HUMAN	CXCR4_HUMAN	curated	PMID:32212206	TRUE	LGarciaAlonso
O43914	P16070	SIG15_HUMAN	TYOBP_HUMAN	curated	PMID:31900164	TRUE	LGarciaAlonso
Q6ZMC9	P16070	SIG15_HUMAN	CD44_HUMAN	curated	PMID:31900164	TRUE	LGarciaAlonso
Q96CM4	SLC16A1_complex	NXNL1_HUMAN		curated	uniprot;PMID:25957687	TRUE	LGarciaAlonso
P62937	P35613	PPIA_HUMAN	BASI_HUMAN	curated	reactome	TRUE	LGarciaAlonso		R-HSA-204485
P01185	P47901	NEU2_HUMAN	V1BR_HUMAN	curated	reactome	TRUE	LGarciaAlonso		R-HSA-388468
P01185	P37288	NEU2_HUMAN	V1AR_HUMAN	curated	reactome	TRUE	LGarciaAlonso		R-HSA-388468
P01185	P30518	NEU2_HUMAN	V2R_HUMAN	curated	reactome	TRUE	LGarciaAlonso		R-HSA-392263
P02647	CUBN_AMN_complex	APOA1_HUMAN		curated	reactome	TRUE	LGarciaAlonso		R-HSA-264848
P10997	AMY3_receptor	IAPP_HUMAN		curated	reactome	TRUE	LGarciaAlonso		R-HSA-420265
P10997	AMY2_receptor	IAPP_HUMAN		curated	reactome	TRUE	LGarciaAlonso		R-HSA-420265
P10997	AMY1_receptor	IAPP_HUMAN		curated	reactome	TRUE	LGarciaAlonso		R-HSA-420265
O00468	P13591	AGRIN_HUMAN	NCAM1_HUMAN	curated	reactome	TRUE	LGarciaAlonso		R-HSA-2467659
O00468	Q13332	AGRIN_HUMAN	PTPRS_HUMAN	curated	reactome	TRUE	LGarciaAlonso		R-HSA-2467659
O00468	LRP4_MUSK_complex	AGRIN_HUMAN		curated	reactome	TRUE	LGarciaAlonso		R-HSA-2467633
Q15848	ADR_complex	ADIPO_HUMAN		curated	reactome	TRUE	LGarciaAlonso		R-HSA-8848663
P04070	Q9UNN8	PROC_HUMAN	PROCR_HUMAN	curated	reactome	TRUE	LGarciaAlonso		R-HSA-5591052
P02647	O95477	APOA1_HUMAN	ABCA1_HUMAN	curated	reactome	TRUE	LGarciaAlonso		R-HSA-216727
Q99435	Q96MS0	NELL2_HUMAN	ROBO3_HUMAN	curated	reactome	TRUE	LGarciaAlonso	R-HSA-9010200	R-HSA-9010190
P41221	Q01974	WNT5A_HUMAN	ROR2_HUMAN	curated	uniprot;reactome	TRUE	LGarciaAlonso		R-HSA-4551571
P42127	Q01726	ASIP_HUMAN	MSHR_HUMAN	curated	uniprot	TRUE	LGarciaAlonso
Q9HC23	Q8TCW9	PROK2_HUMAN	PKR1_HUMAN	curated	reactome;uniprot	TRUE	LGarciaAlonso	R-HSA-444730	R-HSA-444691
P58294	Q8TCW9	PROK2_HUMAN	PKR2_HUMAN	curated	reactome;uniprot	TRUE	LGarciaAlonso	R-HSA-444730	R-HSA-444691
Q9HC23	Q8NFJ6	PROK1_HUMAN	PKR1_HUMAN	curated	reactome;uniprot	TRUE	LGarciaAlonso	R-HSA-444730	R-HSA-444691
P58294	Q8NFJ6	PROK1_HUMAN	PKR2_HUMAN	curated	reactome;uniprot	TRUE	LGarciaAlonso	R-HSA-444730	R-HSA-444691
P12872	O43193	MOTI_HUMAN	MTLR_HUMAN	curated	reactome;uniprot	TRUE	LGarciaAlonso	R-HSA-444197	R-HSA-444208
Q96LR4	P21462	TAFA4_HUMAN	FPR1_HUMAN	curated	uniprot	TRUE	LGarciaAlonso
P05067	P25090	A4_HUMAN	FPR2_HUMAN	curated	reactome	TRUE	LGarciaAlonso	R-HSA-416459	R-HSA-391913
Q8IVG9	P25090	HUNIN_HUMAN	FPR2_HUMAN	curated	reactome	TRUE	LGarciaAlonso	R-HSA-416459	R-HSA-391913
P55773	P25090	CCL23_HUMAN	FPR2_HUMAN	curated	reactome	TRUE	LGarciaAlonso	R-HSA-416459	R-HSA-391913
P0DJI8	P25090	SAA1_HUMAN	FPR2_HUMAN	curated	reactome	TRUE	LGarciaAlonso	R-HSA-416459	R-HSA-391913
P04083	P25089	ANXA1_HUMAN	FPR3_HUMAN	curated	reactome	TRUE	LGarciaAlonso	R-HSA-444847	R-HSA-444476
Q8IVG9	P25089	HUNIN_HUMAN	FPR3_HUMAN	curated	reactome	TRUE	LGarciaAlonso	R-HSA-444847	R-HSA-444476
Q9NRV9	P25089	HEBP1_HUMAN	FPR3_HUMAN	curated	reactome	TRUE	LGarciaAlonso	R-HSA-444847	R-HSA-444476
P01042	Q8TDU9	KNG1_HUMAN	RL3R2_HUMAN	curated	uniprot	TRUE	LGarciaAlonso
B4E1C2	Q8TDU9	B4E1C2_HUMAN	RL3R2_HUMAN	curated	uniprot;HMRbase;reactome	TRUE	LGarciaAlonso		R-HSA-444859
P41221	FDZ8_RYK	WNT5A_HUMAN		curated	reactome;uniprot	TRUE	LGarciaAlonso		R-HSA-5323545	R-HSA-5368598
P56704	FDZ8_RYK	WNT3A_HUMAN		curated	reactome;uniprot	TRUE	LGarciaAlonso		R-HSA-5323545	R-HSA-5368598
P04628	FDZ8_RYK	WNT1_HUMAN		curated	reactome;uniprot	TRUE	LGarciaAlonso		R-HSA-5323545	R-HSA-5368598
P10092	RAMP1_complex	CALCB_HUMAN		curated	uniprot	TRUE	LGarciaAlonso
P06881	RAMP1_complex	CALCA_HUMAN		curated	uniprot	TRUE	LGarciaAlonso
Q7Z4H4	RAMP2_complex	ADM2_HUMAN		curated	uniprot	TRUE	LGarciaAlonso
Q7Z4H4	RAMP3_complex	ADM2_HUMAN		curated	uniprot	TRUE	LGarciaAlonso
P35318	RAMP3_complex	ADML_HUMAN		curated	uniprot	TRUE	LGarciaAlonso
P02792	Q6ZMJ2	FRIL_HUMAN	SCAR5_HUMAN	curated	uniprot	TRUE	LGarciaAlonso
P02794	Q6ZMJ2	FRIH_HUMAN	SCAR5_HUMAN	curated	uniprot	TRUE	LGarciaAlonso
M5A8F1	Q15758	SUPYN_HUMAN	AAAT_HUMAN	curated	uniprot	TRUE	LGarciaAlonso
P30533	Q99523	AMRP_HUMAN	SORT_HUMAN	curated	uniprot	TRUE	LGarciaAlonso
P01138	Q99523	NGF_HUMAN	SORT_HUMAN	curated	uniprot	TRUE	LGarciaAlonso
P23560	Q99523	BDNF_HUMAN	SORT_HUMAN	curated	uniprot	TRUE	LGarciaAlonso
P30990	Q99523	NEUT_HUMAN	SORT_HUMAN	curated	uniprot	TRUE	LGarciaAlonso
P02753	Q9BX79	RET4_HUMAN	STRA6_HUMAN	curated	uniprot	TRUE	LGarciaAlonso
Q6UWK7	P49685	GP15L_HUMAN	GPR15_HUMAN	curated	uniprot	TRUE	LGarciaAlonso
Q6UWK7	Q9UGT4	GP15L_HUMAN	SUSD2_HUMAN	curated	uniprot	TRUE	LGarciaAlonso
Q99075	P04626	HBEGF_HUMAN	ERBB2_HUMAN	curated	uniprot	TRUE	LGarciaAlonso
P22466	P47211	GALA_HUMAN	GALR1_HUMAN	curated	uniprot	TRUE	LGarciaAlonso
Q9UBC7	O43603	GALP_HUMAN	GALR2_HUMAN	curated	uniprot	TRUE	LGarciaAlonso
P22466	O60755	GALA_HUMAN	GALR3_HUMAN	curated	uniprot	TRUE	LGarciaAlonso
P22466	O43603	GALA_HUMAN	GALR2_HUMAN	curated	uniprot	TRUE	LGarciaAlonso
Q9BT56	O60755	SPXN_HUMAN	GALR3_HUMAN	curated	uniprot	TRUE	LGarciaAlonso
Q9BT56	O43603	SPXN_HUMAN	GALR2_HUMAN	curated	uniprot	TRUE	LGarciaAlonso
Q15465	PTCH2_BOC_transmembrane_receptor	SHH_HUMAN		curated	PMID:25448692	TRUE	LGarciaAlonso
Q15465	PTCH2_CDON_transmembrane_receptor	SHH_HUMAN		curated	PMID:25448692	TRUE	LGarciaAlonso
Q15465	PTCH2_GAS1_transmembrane_receptor	SHH_HUMAN		curated	PMID:25448692	TRUE	LGarciaAlonso
P05019	integrin_aVb3_complex	IGF1_HUMAN		curated	uniprot	TRUE	LGarciaAlonso
P05019	IGF1R_enhancerComGPC3	IGF1_HUMAN		curated	PMID:18413366	TRUE	LGarciaAlonso
P02787	Q9UP52	TRFE_HUMAN	TFR2_HUMAN	curated	uniprot	TRUE	LGarciaAlonso
Q30201	P02786	HFE_HUMAN	TFR1_HUMAN	curated	uniprot	TRUE	LGarciaAlonso
P02787	P02786	TRFE_HUMAN	TFR1_HUMAN	curated	uniprot	TRUE	LGarciaAlonso
P00734	P07204	THRB_HUMAN	TRBM_HUMAN	curated	uniprot	TRUE	LGarciaAlonso
P05067	O75509	A4_HUMAN	TNR21_HUMAN	curated	uniprot	TRUE	LGarciaAlonso
Q9ULB5	Q9ULB5	CADH7_HUMAN	CADH7_HUMAN	curated	uniprot	TRUE	LGarciaAlonso
P04114	Q0VD83	APOB_HUMAN	APOBR_HUMAN	curated	uniprot	TRUE	LGarciaAlonso
P05067	TREM2_receptor	A4_HUMAN		curated	uniprot;PMID:27477013	TRUE	LGarciaAlonso
P10909	TREM2_receptor	CLUS_HUMAN		curated	uniprot;PMID:27477014	TRUE	LGarciaAlonso
P02649	TREM2_receptor	APOE_HUMAN		curated	uniprot;PMID:27477015	TRUE	LGarciaAlonso
P04114	TREM2_receptor	APOB_HUMAN		curated	uniprot;PMID:27477016	TRUE	LGarciaAlonso
P02652	TREM2_receptor	APOA2_HUMAN		curated	uniprot;PMID:27477017	TRUE	LGarciaAlonso
P02647	TREM2_receptor	APOA1_HUMAN		curated	uniprot;PMID:27477018	TRUE	LGarciaAlonso
Q14393	P30530	GAS6_HUMAN	UFO_HUMAN	curated	uniprot	TRUE	LGarciaAlonso
O95631	O60469	NET1_HUMAN	DSCAM_HUMAN	curated	uniprot	TRUE	LGarciaAlonso
O95631	P43146	NET1_HUMAN	DCC_HUMAN	curated	uniprot	TRUE	LGarciaAlonso
O95399	Q9UKP6	UTS2_HUMAN	UR2R_HUMAN	curated	uniprot;reactome	TRUE	LGarciaAlonso		R-HSA-445113
P41221	Q01973	WNT5A_HUMAN	ROR1_HUMAN	curated	uniprot;PMID:27162350	TRUE	LGarciaAlonso
P78509	Q14114	RELN_HUMAN	LRP8_HUMAN	curated	uniprot	TRUE	LGarciaAlonso
P18509	P41587	PACA_HUMAN	VIPR2_HUMAN	curated	uniprot	TRUE	LGarciaAlonso
P01282	P41587	VIP_HUMAN	VIPR2_HUMAN	curated	uniprot	TRUE	LGarciaAlonso
P05067	Q92673	A4_HUMAN	SORL_HUMAN	curated	uniprot	TRUE	LGarciaAlonso
P35318	O60896	ADML_HUMAN	RAMP3_HUMAN	curated	uniprot	TRUE	LGarciaAlonso
O00253	P32245	AGRP_HUMAN	MC4R_HUMAN	curated	uniprot	TRUE	LGarciaAlonso
O00253	P41968	AGRP_HUMAN	MC3R_HUMAN	curated	uniprot	TRUE	LGarciaAlonso
P01160	P16066	ANF_HUMAN	ANPRA_HUMAN	curated	uniprot	TRUE	LGarciaAlonso
P01019	P30556	ANGT_HUMAN	AGTR1_HUMAN	curated	uniprot	TRUE	LGarciaAlonso	R-HSA-389873
P01019	P50052	ANGT_HUMAN	AGTR2_HUMAN	curated	uniprot	TRUE	LGarciaAlonso	R-HSA-389873
Q9ULZ1	P35414	APEL_HUMAN	APJ_HUMAN	curated	uniprot	TRUE	LGarciaAlonso	R-HSA-374316
Q7Z6A9	Q92956	BTLA_HUMAN	TNR14_HUMAN	curated	PMID:31204070;uniprot	TRUE	LGarciaAlonso
P01258	P30988	CALC_HUMAN	CALCR_HUMAN	curated	uniprot;HMRbase;PMID:7476993	TRUE	LGarciaAlonso
P06307	P32238	CCKN_HUMAN	CCKAR_HUMAN	curated	uniprot;HMRbase;reactome	TRUE	LGarciaAlonso		R-HSA-388529
P06307	P32239	CCKN_HUMAN	GASR_HUMAN	curated	uniprot;HMRbase;reactome	TRUE	LGarciaAlonso		R-HSA-388529
O15467	P51685	CCL16_HUMAN	CCR8_HUMAN	curated	uniprot;reactome	TRUE	LGarciaAlonso	R-HSA-373268
O15467	Q9H3N8	CCL16_HUMAN	HRH4_HUMAN	curated	PMID:15265943	TRUE	LGarciaAlonso
Q99731	O00421	CCL19_HUMAN	CCRL2_HUMAN	curated	uniprot	TRUE	LGarciaAlonso
P13501	O95800	CCL5_HUMAN	GPR75_HUMAN	curated	uniprot	TRUE	LGarciaAlonso
P46092	Q9NRJ3	CCR10_HUMAN	CCL28_HUMAN	curated	uniprot	TRUE	LGarciaAlonso
Q12860	P46531	CNTN1_HUMAN	NOTC1_HUMAN	curated	uniprot;PMID:14567914	TRUE	LGarciaAlonso
Q12860	Q04721	CNTN1_HUMAN	NOTC2_HUMAN	curated	reactome;PMID:14567914	TRUE	LGarciaAlonso	R-HSA-2220817	R-HSA-2220816
P01024	Q16581	CO3_HUMAN	C3AR_HUMAN	curated	uniprot;reactome	TRUE	LGarciaAlonso	R-HSA-444688
P01024	Q9P296	CO3_HUMAN	C5AR2_HUMAN	curated	uniprot	TRUE	LGarciaAlonso
P0C0L4	Q9P296	CO4A_HUMAN	C5AR2_HUMAN	curated	uniprot	TRUE	LGarciaAlonso
P01031	P21730	CO5_HUMAN	C5AR1_HUMAN	curated	uniprot	TRUE	LGarciaAlonso	R-HSA-375354
P01031	Q9P296	CO5_HUMAN	C5AR2_HUMAN	curated	uniprot	TRUE	LGarciaAlonso
P01189	P32245	COLI_HUMAN	MC4R_HUMAN	curated	uniprot;reactome	TRUE	LGarciaAlonso		R-HSA-388596
P01189	P33032	COLI_HUMAN	MC5R_HUMAN	curated	uniprot;reactome	TRUE	LGarciaAlonso		R-HSA-388596
P01189	P35372	COLI_HUMAN	OPRM_HUMAN	curated	uniprot;reactome	TRUE	LGarciaAlonso		R-HSA-112042
P01189	P41143	COLI_HUMAN	OPRD_HUMAN	curated	reactome	TRUE	LGarciaAlonso		R-HSA-374298
P01189	P41145	COLI_HUMAN	OPRK_HUMAN	curated	reactome	TRUE	LGarciaAlonso		R-HSA-374298
P01189	P41968	COLI_HUMAN	MC3R_HUMAN	curated	uniprot;reactome	TRUE	LGarciaAlonso		R-HSA-388596
P01189	Q01718	COLI_HUMAN	ACTHR_HUMAN	curated	uniprot	TRUE	LGarciaAlonso
P01189	Q01726	COLI_HUMAN	MSHR_HUMAN	curated	uniprot;HMRbase;reactome	TRUE	LGarciaAlonso		R-HSA-388596
O00230	P30872	CORT_HUMAN	SSR1_HUMAN	curated	uniprot;HMRbase;reactome	TRUE	LGarciaAlonso		R-HSA-374758
O00230	P30874	CORT_HUMAN	SSR2_HUMAN	curated	uniprot;HMRbase;reactome	TRUE	LGarciaAlonso		R-HSA-374758
O00230	P31391	CORT_HUMAN	SSR4_HUMAN	curated	uniprot;HMRbase;reactome	TRUE	LGarciaAlonso		R-HSA-374758
O00230	P32745	CORT_HUMAN	SSR3_HUMAN	curated	uniprot;HMRbase;reactome	TRUE	LGarciaAlonso		R-HSA-374758
O00230	P35346	CORT_HUMAN	SSR5_HUMAN	curated	uniprot;HMRbase;reactome	TRUE	LGarciaAlonso		R-HSA-374758
P06850	P34998	CRF_HUMAN	CRFR1_HUMAN	curated	uniprot;HMRbase;reactome	TRUE	LGarciaAlonso		R-HSA-420173
P06850	Q13324	CRF_HUMAN	CRFR2_HUMAN	curated	uniprot;HMRbase;reactome	TRUE	LGarciaAlonso		R-HSA-420173
O14625	P25106	CXL11_HUMAN	ACKR3_HUMAN	curated	uniprot	TRUE	LGarciaAlonso
Q9H2A7	O00574	CXL16_HUMAN	CXCR6_HUMAN	curated	uniprot	TRUE	LGarciaAlonso
O43323	PTCH_BOC_transmembrane_receptor	DHH_HUMAN		curated	reactome	TRUE	LGarciaAlonso		R-HSA-5632653
O43323	PTCH_CDON_transmembrane_receptor	DHH_HUMAN		curated	reactome	TRUE	LGarciaAlonso		R-HSA-5632653
O43323	PTCH_GAS1_transmembrane_receptor	DHH_HUMAN		curated	reactome	TRUE	LGarciaAlonso		R-HSA-5632653
O43323	Q96QV1	DHH_HUMAN	HHIP_HUMAN	curated	reactome;PMID:10050855;PMID:19561611	TRUE	LGarciaAlonso		R-HSA-445448
Q2MKA7	FZD8_LRP6	RSPO1_HUMAN		curated	uniprot	TRUE	LGarciaAlonso
Q2MKA7	Kremen1_LRP6	RSPO1_HUMAN		curated	uniprot	TRUE	LGarciaAlonso
O94907	Kremen1_LRP6	DKK1_HUMAN		curated	reactome;PMID:27524201;PDB:5FWW	TRUE	LGarciaAlonso		R-HSA-3769401
O94907	Kremen2_LRP6	DKK1_HUMAN		curated	reactome	TRUE	LGarciaAlonso		R-HSA-3769401
Q9UBU2	Kremen2_LRP6	DKK2_HUMAN		curated	reactome;PMID:12527209	TRUE	LGarciaAlonso		R-HSA-3769401
Q9UBU2	O75581	DKK2_HUMAN	LRP6_HUMAN	curated	uniprot;PMID:30035713	TRUE	LGarciaAlonso
P0DMC3	P35414	ELA_HUMAN	APJ_HUMAN	curated	uniprot	TRUE	LGarciaAlonso	R-HSA-374316
P05230	P21802	FGF1_HUMAN	FGFR2_HUMAN	curated	uniprot;reactome;PMID:27458533	TRUE	LGarciaAlonso	R-HSA-190227	R-HSA-190260	R-HSA-5654738
P05230	P22455	FGF1_HUMAN	FGFR4_HUMAN	curated	reactome;PMID:25772309	TRUE	LGarciaAlonso		R-HSA-190265	R-HSA-190322
P05230	P22607	FGF1_HUMAN	FGFR3_HUMAN	curated	uniprot;reactome;PMID:27458533	TRUE	LGarciaAlonso	R-HSA-190232	R-HSA-190263	R-HSA-190239
O15520	P21802	FGF10_HUMAN	FGFR2_HUMAN	curated	reactome;PMID:25772309	TRUE	LGarciaAlonso	R-HSA-190227	R-HSA-190260	R-HSA-5654738
O60258	P22607	FGF17_HUMAN	FGFR3_HUMAN	curated	uniprot;reactome;PMID:27458533;PMID:25772309	TRUE	LGarciaAlonso	R-HSA-190232	R-HSA-190263	R-HSA-190239
O95750	BetaKlotho_FGFR4	FGF19_HUMAN		curated	uniprot;reactome;PMID:25772309	TRUE	LGarciaAlonso	R-HSA-1307953	R-HSA-1307955	R-HSA-190322
Q9NP95	P22607	FGF20_HUMAN	FGFR3_HUMAN	curated	uniprot;reactome;PMID:25772309	TRUE	LGarciaAlonso	R-HSA-190232	R-HSA-190263	R-HSA-190239
Q9NSA1	BetaKlotho_FGFR4	FGF21_HUMAN		curated	uniprot;PMID:25772309	TRUE	LGarciaAlonso
Q9HCT0	P21802	FGF22_HUMAN	FGFR2_HUMAN	curated	reactome;PMID:25772309	TRUE	LGarciaAlonso	R-HSA-190227	R-HSA-190260	R-HSA-5654738
Q9GZV9	Klotho_FGFR1	FGF23_HUMAN		curated	reactome;PMID:25772309	TRUE	LGarciaAlonso	R-HSA-500333	R-HSA-190268	R-HSA-5654736
P11487	P21802	FGF3_HUMAN	FGFR2_HUMAN	curated	reactome;PMID:25772309	TRUE	LGarciaAlonso	R-HSA-190227	R-HSA-190260	R-HSA-5654738
P08620	P11362	FGF4_HUMAN	FGFR1_HUMAN	curated	uniprot;reactome;PMID:27458533;PMID:25772309	TRUE	LGarciaAlonso		R-HSA-190256	R-HSA-5654736
P12034	P11362	FGF5_HUMAN	FGFR1_HUMAN	curated	uniprot;reactome;PMID:27458533;PMID:25772309	TRUE	LGarciaAlonso		R-HSA-190256	R-HSA-5654736
P10767	P11362	FGF6_HUMAN	FGFR1_HUMAN	curated	uniprot;reactome;PMID:27458533;PMID:25772309	TRUE	LGarciaAlonso		R-HSA-190256	R-HSA-5654736
P21781	P21802	FGF7_HUMAN	FGFR2_HUMAN	curated	reactome;PMID:25772309	TRUE	LGarciaAlonso	R-HSA-190227	R-HSA-190260	R-HSA-5654738
P55075	P22607	FGF8_HUMAN	FGFR3_HUMAN	curated	uniprot;reactome;PMID:27458533;PMID:25772309	TRUE	LGarciaAlonso	R-HSA-190232	R-HSA-190263	R-HSA-190239
P31371	P22607	FGF9_HUMAN	FGFR3_HUMAN	curated	uniprot;reactome;PMID:27458533;PMID:25772309	TRUE	LGarciaAlonso	R-HSA-190232	R-HSA-190263	R-HSA-190239
Q08830	P18627	FGL1_HUMAN	LAG3_HUMAN	curated	uniprot	TRUE	LGarciaAlonso
P22466	GALR1	GALA_HUMAN		curated	uniprot	TRUE	LGarciaAlonso
P22466	GALR2	GALA_HUMAN		curated	uniprot	TRUE	LGarciaAlonso
P22466	GALR3	GALA_HUMAN		curated	uniprot	TRUE	LGarciaAlonso
Q9UBC7	GALR1	GALP_HUMAN		curated	uniprot	TRUE	LGarciaAlonso
Q9UBC7	GALR2	GALP_HUMAN		curated	uniprot	TRUE	LGarciaAlonso
Q9UBC7	GALR3	GALP_HUMAN		curated	uniprot	TRUE	LGarciaAlonso
Q14393	Q12866	GAS6_HUMAN	MERTK_HUMAN	curated	uniprot	TRUE	LGarciaAlonso
P01350	P32239	GAST_HUMAN	GASR_HUMAN	curated	uniprot;HMRbase;reactome	TRUE	LGarciaAlonso		R-HSA-870269
Q9UBU3	Q02643	GHRL_HUMAN	GHRHR_HUMAN	curated	uniprot;HMRbase;reactome	TRUE	LGarciaAlonso		R-HSA-947647
P09681	P48546	GIP_HUMAN	GIPR_HUMAN	curated	uniprot	TRUE	LGarciaAlonso
P01275	O95838	GLUC_HUMAN	GLP2R_HUMAN	curated	uniprot	TRUE	LGarciaAlonso
P01275	P43220	GLUC_HUMAN	GLP1R_HUMAN	curated	uniprot	TRUE	LGarciaAlonso
P01275	P47871	GLUC_HUMAN	GLR_HUMAN	curated	uniprot;HMRbase;reactome	TRUE	LGarciaAlonso		R-HSA-163625
P01148	P30968	GON1_HUMAN	GNRHR_HUMAN	curated	uniprot;HMRbase;reactome	TRUE	LGarciaAlonso		R-HSA-391372
P01148	Q96P88	GON1_HUMAN	GNRR2_HUMAN	curated	uniprot;HMRbase;reactome	TRUE	LGarciaAlonso		R-HSA-391372
O43555	P30968	GON2_HUMAN	GNRHR_HUMAN	curated	uniprot;HMRbase;reactome	TRUE	LGarciaAlonso		R-HSA-391372
O43555	Q96P88	GON2_HUMAN	GNRR2_HUMAN	curated	uniprot;HMRbase;reactome	TRUE	LGarciaAlonso		R-HSA-391372
P07492	P30550	GRP_HUMAN	GRPR_HUMAN	curated	uniprot;HMRbase;reactome	TRUE	LGarciaAlonso		R-HSA-375384
P17936	Q86XT9	IBP3_HUMAN	TM219_HUMAN	curated	reactome;uniprot;PMID:20353938	TRUE	LGarciaAlonso	R-HSA-6800024	R-HSA-6800035
P13598	Q9NNX6	ICAM2_HUMAN	CD209_HUMAN	curated	uniprot	TRUE	LGarciaAlonso
Q14623	PTCH_BOC_transmembrane_receptor	IHH_HUMAN		curated	reactome	TRUE	LGarciaAlonso		R-HSA-5632653
Q14623	PTCH_CDON_transmembrane_receptor	IHH_HUMAN		curated	reactome	TRUE	LGarciaAlonso		R-HSA-5632653
Q14623	PTCH_GAS1_transmembrane_receptor	IHH_HUMAN		curated	reactome	TRUE	LGarciaAlonso		R-HSA-5632653
Q14623	Q96QV1	IHH_HUMAN	HHIP_HUMAN	curated	reactome;PMID:10050855	TRUE	LGarciaAlonso		R-HSA-445448
P51460	Q8WXD0	INSL3_HUMAN	RXFP2_HUMAN	curated	uniprot;reactome	TRUE	LGarciaAlonso	R-HSA-444902	R-HSA-444879
Q9Y5Q6	Q8TDU9	INSL5_HUMAN	RL3R2_HUMAN	curated	uniprot;reactome	TRUE	LGarciaAlonso	R-HSA-444907	R-HSA-444859
P01042	P30411	KNG1_HUMAN	BKRB2_HUMAN	curated	uniprot;reactome	TRUE	LGarciaAlonso	R-HSA-374321
P01042	P46663	KNG1_HUMAN	BKRB1_HUMAN	curated	uniprot;reactome	TRUE	LGarciaAlonso	R-HSA-374321
P32004	integrin_a2Bb3_complex	L1CAM_HUMAN		curated	reactome	TRUE	LGarciaAlonso	R-HSA-374579	R-HSA-374686
P32004	integrin_a9b1_complex	L1CAM_HUMAN		curated	reactome	TRUE	LGarciaAlonso	R-HSA-374579	R-HSA-374686
P32004	integrin_aVb1_complex	L1CAM_HUMAN		curated	reactome	TRUE	LGarciaAlonso	R-HSA-374579	R-HSA-374686
P32004	pL1:Ezrin	L1CAM_HUMAN		curated	reactome	TRUE	LGarciaAlonso	R-HSA-191438	R-HSA-374680
P17931	Q12866	LEG3_HUMAN	MERTK_HUMAN	curated	uniprot	TRUE	LGarciaAlonso
O00182	BCR_CD45_CD22	LEG9_HUMAN		curated	PMID:30120235	TRUE	LGarciaAlonso
O00182	P07237	LEG9_HUMAN	PDIA1_HUMAN	curated	PMID:21670307;uniprot	TRUE	LGarciaAlonso
P20382	Q969V1	MCH_HUMAN	MCHR2_HUMAN	curated	reactome	TRUE	LGarciaAlonso		R-HSA-947673
P20382	Q99705	MCH_HUMAN	MCHR1_HUMAN	curated	reactome	TRUE	LGarciaAlonso		R-HSA-947673
Q9HB63	Q16620	NET4_HUMAN	NTRK2_HUMAN	curated	uniprot	TRUE	LGarciaAlonso
P34130	Q16620	NTF4_HUMAN	NTRK2_HUMAN	curated	uniprot	TRUE	LGarciaAlonso
Q9HB63	Q8IZJ1	NET4_HUMAN	UNC5B_HUMAN	curated	uniprot	TRUE	LGarciaAlonso
P01178	P30559	NEU1_HUMAN	OXYR_HUMAN	curated	uniprot;HMRbase;reactome	TRUE	LGarciaAlonso		R-HSA-388503
P80188	Q8WUG5	NGAL_HUMAN	S22AH_HUMAN	curated	uniprot;reactome	TRUE	LGarciaAlonso		R-HSA-5246444
P08949	P28336	NMB_HUMAN	NMBR_HUMAN	curated	uniprot;HMRbase;reactome	TRUE	LGarciaAlonso		R-HSA-375384
P48645	Q9GZQ4	NMU_HUMAN	NMUR2_HUMAN	curated	uniprot	TRUE	LGarciaAlonso
P48645	Q9HB89	NMU_HUMAN	NMUR1_HUMAN	curated	uniprot	TRUE	LGarciaAlonso
Q96S42	NODAL_receptor_IbIIa_CFC1	NODAL_HUMAN		curated	reactome	TRUE	LGarciaAlonso	R-HSA-1181132	R-HSA-1181155
Q96S42	NODAL_receptor_IbIIa_TDGF1	NODAL_HUMAN		curated	reactome	TRUE	LGarciaAlonso	R-HSA-1181132	R-HSA-1181155
Q96S42	NODAL_receptor_IbIIb_CFC1	NODAL_HUMAN		curated	PMID:22710174	TRUE	LGarciaAlonso
Q96S42	NODAL_receptor_IcIIb_CFC1	NODAL_HUMAN		curated	reactome;PMID:15150278	TRUE	LGarciaAlonso	R-HSA-1181141	R-HSA-1181155
Q96S42	NODAL_receptor_IcIIb_TDGF1	NODAL_HUMAN		curated	reactome;PMID:15150278	TRUE	LGarciaAlonso	R-HSA-1181141	R-HSA-1181155
Q8NG41	P48145	NPB_HUMAN	NPBW1_HUMAN	curated	uniprot;reactome	TRUE	LGarciaAlonso	R-HSA-374779
Q8NG41	P48146	NPB_HUMAN	NPBW2_HUMAN	curated	uniprot;reactome	TRUE	LGarciaAlonso	R-HSA-374779
P0C0P6	Q6W5P4	NPS_HUMAN	NPSR1_HUMAN	curated	uniprot	TRUE	LGarciaAlonso
Q8N729	P48145	NPW_HUMAN	NPBW1_HUMAN	curated	uniprot;reactome	TRUE	LGarciaAlonso	R-HSA-374779
Q8N729	P48146	NPW_HUMAN	NPBW2_HUMAN	curated	uniprot;reactome	TRUE	LGarciaAlonso	R-HSA-374779
Q6X4W1	P30968	NSMF_HUMAN	GNRHR_HUMAN	curated	uniprot;HMRbase	TRUE	LGarciaAlonso
O43612	O43613	OREX_HUMAN	OX1R_HUMAN	curated	uniprot	TRUE	LGarciaAlonso
O43612	O43614	OREX_HUMAN	OX2R_HUMAN	curated	uniprot	TRUE	LGarciaAlonso
Q9NZ53	P14151	PDXL2_HUMAN	LYAM1_HUMAN	curated	uniprot	TRUE	LGarciaAlonso
Q9NZ53	P16109	PDXL2_HUMAN	LYAM3_HUMAN	curated	uniprot	TRUE	LGarciaAlonso
Q9NZ53	P16581	PDXL2_HUMAN	LYAM2_HUMAN	curated	uniprot	TRUE	LGarciaAlonso
P01213	P35372	PDYN_HUMAN	OPRM_HUMAN	curated	uniprot;reactome	TRUE	LGarciaAlonso		R-HSA-112042
P01213	P41143	PDYN_HUMAN	OPRD_HUMAN	curated	reactome	TRUE	LGarciaAlonso		R-HSA-374298
P01213	P41145	PDYN_HUMAN	OPRK_HUMAN	curated	reactome	TRUE	LGarciaAlonso		R-HSA-374298
P01210	P35372	PENK_HUMAN	OPRM_HUMAN	curated	reactome	TRUE	LGarciaAlonso		R-HSA-374298
P01210	P41143	PENK_HUMAN	OPRD_HUMAN	curated	reactome	TRUE	LGarciaAlonso		R-HSA-374298
P01210	P41145	PENK_HUMAN	OPRK_HUMAN	curated	reactome	TRUE	LGarciaAlonso		R-HSA-374298
Q13519	P41146	PNOC_HUMAN	OPRX_HUMAN	curated	uniprot;reactome	TRUE	LGarciaAlonso	R-HSA-374725
P01236	P16471	PRL_HUMAN	PRLR_HUMAN	curated	uniprot;HMRbase;PMID:12580759	TRUE	LGarciaAlonso
P81277	P49683	PRRP_HUMAN	PRLHR_HUMAN	curated	uniprot;HMRbase;reactome	TRUE	LGarciaAlonso		R-HSA-388855
P12272	P49190	PTHR_HUMAN	PTH2R_HUMAN	curated	uniprot;reactome	TRUE	LGarciaAlonso		R-HSA-420489
P12272	Q03431	PTHR_HUMAN	PTH1R_HUMAN	curated	uniprot;reactome	TRUE	LGarciaAlonso		R-HSA-420489
P01270	P49190	PTHY_HUMAN	PTH2R_HUMAN	curated	uniprot;reactome	TRUE	LGarciaAlonso		R-HSA-420489
P01270	Q03431	PTHY_HUMAN	PTH1R_HUMAN	curated	uniprot;HMRbase;reactome	TRUE	LGarciaAlonso		R-HSA-420489
P08575	Q92854	PTPRC_HUMAN	SEM4D_HUMAN	curated	PMID:22325954	TRUE	LGarciaAlonso	R-HSA-373689	R-HSA-373746
Q13332	Q16288	PTPRS_HUMAN	NTRK3_HUMAN	curated	reactome	TRUE	LGarciaAlonso	R-HSA-6798231	R-HSA-6798257
Q99969	O00421	RARR2_HUMAN	CCRL2_HUMAN	curated	uniprot	TRUE	LGarciaAlonso
Q99969	P46091	RARR2_HUMAN	GPR1_HUMAN	curated	uniprot	TRUE	LGarciaAlonso
Q99969	Q99788	RARR2_HUMAN	CML1_HUMAN	curated	uniprot	TRUE	LGarciaAlonso
P04090	Q8WXD0	REL2_HUMAN	RXFP2_HUMAN	curated	uniprot;reactome	TRUE	LGarciaAlonso	R-HSA-444902	R-HSA-444879
P04090	Q9HBX9	REL2_HUMAN	RXFP1_HUMAN	curated	uniprot;HMRbase;reactome	TRUE	LGarciaAlonso		R-HSA-444838
Q8WXF3	Q8TDU9	REL3_HUMAN	RL3R2_HUMAN	curated	uniprot;HMRbase;reactome	TRUE	LGarciaAlonso	R-HSA-444907	R-HSA-444859
Q8WXF3	Q8WXD0	REL3_HUMAN	RXFP2_HUMAN	curated	uniprot;HMRbase;reactome	TRUE	LGarciaAlonso		R-HSA-444879
Q8WXF3	Q9HBX9	REL3_HUMAN	RXFP1_HUMAN	curated	uniprot;HMRbase;reactome	TRUE	LGarciaAlonso		R-HSA-444838
Q8WXF3	Q9NSD7	REL3_HUMAN	RL3R1_HUMAN	curated	uniprot;HMRbase;reactome	TRUE	LGarciaAlonso		R-HSA-444848
P00797	O75787	RENI_HUMAN	RENR_HUMAN	curated	uniprot;HMRbase;_PMID:12045255	TRUE	LGarciaAlonso
Q2MKA7	O75473	RSPO1_HUMAN	LGR5_HUMAN	curated	uniprot;reactome	TRUE	RVentoTormo		R-HSA-4641206
Q2MKA7	Q9BXB1	RSPO1_HUMAN	LGR4_HUMAN	curated	uniprot;reactome	TRUE	RVentoTormo		R-HSA-4641206
Q2MKA7	Q9HBX8	RSPO1_HUMAN	LGR6_HUMAN	curated	uniprot;reactome	TRUE	RVentoTormo		R-HSA-4641206
Q6UXX9	O75473	RSPO2_HUMAN	LGR5_HUMAN	curated	uniprot;reactome	TRUE	LGarciaAlonso		R-HSA-4641206
Q6UXX9	Q9BXB1	RSPO2_HUMAN	LGR4_HUMAN	curated	uniprot;reactome	TRUE	LGarciaAlonso		R-HSA-4641206
Q6UXX9	Q9HBX8	RSPO2_HUMAN	LGR6_HUMAN	curated	uniprot;reactome	TRUE	LGarciaAlonso		R-HSA-4641206
Q9BXY4	O75473	RSPO3_HUMAN	LGR5_HUMAN	curated	uniprot;reactome	TRUE	LGarciaAlonso		R-HSA-4641206
Q9BXY4	Q9BXB1	RSPO3_HUMAN	LGR4_HUMAN	curated	uniprot;reactome	TRUE	LGarciaAlonso		R-HSA-4641206
Q9BXY4	Q9HBX8	RSPO3_HUMAN	LGR6_HUMAN	curated	uniprot;reactome	TRUE	LGarciaAlonso		R-HSA-4641206
Q2I0M5	O75473	RSPO4_HUMAN	LGR5_HUMAN	curated	uniprot;reactome	TRUE	LGarciaAlonso		R-HSA-4641206
Q2I0M5	Q9BXB1	RSPO4_HUMAN	LGR4_HUMAN	curated	uniprot;reactome	TRUE	LGarciaAlonso		R-HSA-4641206
Q2I0M5	Q9HBX8	RSPO4_HUMAN	LGR6_HUMAN	curated	uniprot;reactome	TRUE	LGarciaAlonso		R-HSA-4641206
P07602	O15354	SAP_HUMAN	GPR37_HUMAN	curated	uniprot	TRUE	LGarciaAlonso
P07602	O60883	SAP_HUMAN	G37L1_HUMAN	curated	uniprot	TRUE	LGarciaAlonso
P09683	P47872	SECR_HUMAN	SCTR_HUMAN	curated	uniprot;HMRbase;reactome	TRUE	LGarciaAlonso		R-HSA-420202
Q15465	PTCH_BOC_transmembrane_receptor	SHH_HUMAN		curated	reactome	TRUE	LGarciaAlonso		R-HSA-5632653
Q15465	PTCH_CDON_transmembrane_receptor	SHH_HUMAN		curated	reactome	TRUE	LGarciaAlonso		R-HSA-5632653
Q15465	PTCH_GAS1_transmembrane_receptor	SHH_HUMAN		curated	reactome	TRUE	LGarciaAlonso		R-HSA-5632653
Q15465	Q96QV1	SHH_HUMAN	HHIP_HUMAN	curated	reactome;PMID:10050855;PMID:19561611	TRUE	LGarciaAlonso		R-HSA-445448
P01286	Q02643	SLIB_HUMAN	GHRHR_HUMAN	curated	uniprot;HMRbase;reactome	TRUE	LGarciaAlonso		R-HSA-420243
O75093	Q9Y6N7	SLIT1_HUMAN	ROBO1_HUMAN	curated	uniprot;PMID:10102268	TRUE	LGarciaAlonso
O94813	Q9HCK4	SLIT2_HUMAN	ROBO2_HUMAN	curated	uniprot;PMID:10102268	TRUE	LGarciaAlonso
O94813	Q9Y6N7	SLIT2_HUMAN	ROBO1_HUMAN	curated	reactome;uniprot;PMID:10102268	TRUE	LGarciaAlonso	R-HSA-390371	R-HSA-204364
P61278	P30872	SMS_HUMAN	SSR1_HUMAN	curated	uniprot;HMRbase;reactome	TRUE	LGarciaAlonso		R-HSA-374758
P61278	P30874	SMS_HUMAN	SSR2_HUMAN	curated	uniprot;HMRbase;reactome	TRUE	LGarciaAlonso		R-HSA-374758
P61278	P31391	SMS_HUMAN	SSR4_HUMAN	curated	uniprot;HMRbase;reactome	TRUE	LGarciaAlonso		R-HSA-374758
P61278	P32745	SMS_HUMAN	SSR3_HUMAN	curated	uniprot;HMRbase;reactome	TRUE	LGarciaAlonso		R-HSA-374758
P61278	P35346	SMS_HUMAN	SSR5_HUMAN	curated	uniprot;HMRbase;reactome	TRUE	LGarciaAlonso		R-HSA-374758
P01242	P10912	SOM2_HUMAN	GHR_HUMAN	curated	uniprot;HMRbase	TRUE	LGarciaAlonso
P01241	P10912	SOMA_HUMAN	GHR_HUMAN	curated	uniprot;HMRbase	TRUE	LGarciaAlonso
Q7Z5A9	P46091	TAFA1_HUMAN	GPR1_HUMAN	curated	uniprot	TRUE	LGarciaAlonso
Q7Z5A7	O95136	TAFA5_HUMAN	S1PR2_HUMAN	curated	uniprot	TRUE	LGarciaAlonso
Q7Z5A7	P25090	TAFA5_HUMAN	FPR2_HUMAN	curated	uniprot	TRUE	LGarciaAlonso
P10600	integrin_aVb6_complex	TGFB3_HUMAN		curated	reactome	TRUE	LGarciaAlonso	R-HSA-2396121	R-HSA-2396029
P10600	integrin_aVb8_complex	TGFB3_HUMAN		curated	reactome	TRUE	LGarciaAlonso	R-HSA-2396121	R-HSA-2396029
Q96A98	P49190	TIP39_HUMAN	PTH2R_HUMAN	curated	uniprot;reactome	TRUE	LGarciaAlonso		R-HSA-420489
Q96A98	Q03431	TIP39_HUMAN	PTH1R_HUMAN	curated	uniprot;reactome	TRUE	LGarciaAlonso		R-HSA-420489
P20366	P21452	TKN1_HUMAN	NK2R_HUMAN	curated	uniprot;reactome	TRUE	LGarciaAlonso		R-HSA-383363
P20366	P25103	TKN1_HUMAN	NK1R_HUMAN	curated	uniprot;reactome	TRUE	LGarciaAlonso		R-HSA-380076
Q9UHF0	P29371	TKNK_HUMAN	NK3R_HUMAN	curated	uniprot;reactome	TRUE	LGarciaAlonso		R-HSA-383373
O43508	Q93038	TNF12_HUMAN	TNR25_HUMAN	curated	uniprot	TRUE	LGarciaAlonso
O95150	Q93038	TNF15_HUMAN	TNR25_HUMAN	curated	reactome	TRUE	LGarciaAlonso	R-HSA-5693013	R-HSA-5693012
P20396	P34981	TRH_HUMAN	TRFR_HUMAN	curated	uniprot;HMRbase;reactome	TRUE	LGarciaAlonso		R-HSA-444498
P07996	P16671	TSP1_HUMAN	CD36_HUMAN	curated	uniprot	TRUE	LGarciaAlonso
P35442	P16671	TSP2_HUMAN	CD36_HUMAN	curated	uniprot	TRUE	LGarciaAlonso
P55089	P34998	UCN1_HUMAN	CRFR1_HUMAN	curated	uniprot;reactome	TRUE	LGarciaAlonso		R-HSA-420173
P55089	Q13324	UCN1_HUMAN	CRFR2_HUMAN	curated	uniprot;reactome	TRUE	LGarciaAlonso		R-HSA-420173
Q96RP3	Q13324	UCN2_HUMAN	CRFR2_HUMAN	curated	uniprot	TRUE	LGarciaAlonso		R-HSA-8937631
Q969E3	Q13324	UCN3_HUMAN	CRFR2_HUMAN	curated	uniprot	TRUE	LGarciaAlonso		R-HSA-8937631
P01282	P32241	VIP_HUMAN	VIPR1_HUMAN	curated	uniprot	TRUE	LGarciaAlonso
P56703	FDZ8_RYK	WNT3_HUMAN		curated	reactome;uniprot;PMID:16116452	TRUE	LGarciaAlonso	R-HSA-5323537	R-HSA-5323545	R-HSA-5368598
BMPR1B_BMPR2_ACVR1B	BMP9_BMP15			curated	PMID:1218020110	TRUE	LGarciaAlonso
ACVL1_ACVR2A	O95393		BMP10_HUMAN	curated	PMID:25136781	TRUE	LGarciaAlonso
Thyrostimulin	P16473		TSHR_HUMAN	curated	uniprot;HMRbase;reactome	TRUE	LGarciaAlonso	R-HSA-391374	R-HSA-391375
Thyrotropin	P16473		TSHR_HUMAN	curated	uniprot;HMRbase;reactome	TRUE	LGarciaAlonso	R-HSA-391374	R-HSA-391375
glyco_Lutropin	P22888		LSHR_HUMAN	curated	reactome	TRUE	LGarciaAlonso	R-HSA-391367	R-HSA-391377	R-HSA-375281
Follitropin	P23945		FSHR_HUMAN	curated	reactome	TRUE	LGarciaAlonso	R-HSA-391365	R-HSA-391378	R-HSA-375281
PlexinA2_complex1	Q9H2E6		SEM6A_HUMAN	curated	uniprot	TRUE	LGarciaAlonso
ACVL1_ACVR2A	Q9UK05		GDF2_HUMAN	curated	PMID:25136781	TRUE	LGarciaAlonso
ACVR_1B2A_receptor	P05111		INHA_HUMAN	curated	PMID:22710174;PMID:22991378	TRUE	LGarciaAlonso
ACVR_1A2A_receptor	P05111		INHA_HUMAN	curated	PMID:22710174;PMID:22991378	TRUE	LGarciaAlonso
ACVR_1B2B_receptor	P05111		INHA_HUMAN	curated	PMID:22710174;PMID:22991378	TRUE	LGarciaAlonso
ACVR_1C2A_receptor	P05111		INHA_HUMAN	curated	PMID:22710174;PMID:22991378	TRUE	LGarciaAlonso
ACVR_1A2B_receptor	P05111		INHA_HUMAN	curated	PMID:22710174;PMID:22991378	TRUE	LGarciaAlonso
ACVR_1C2B_receptor	P05111		INHA_HUMAN	curated	PMID:22710174;PMID:22991378	TRUE	LGarciaAlonso
ACVR_1B2A_receptor	Inhibin_ligand_A			curated	PMID:22710174;PMID:22991378	TRUE	LGarciaAlonso
ACVR_1A2A_receptor	Inhibin_ligand_A			curated	PMID:22710174;PMID:22991378	TRUE	LGarciaAlonso
ACVR_1B2B_receptor	Inhibin_ligand_A			curated	PMID:22710174;PMID:22991378	TRUE	LGarciaAlonso
ACVR_1C2A_receptor	Inhibin_ligand_A			curated	PMID:22710174;PMID:22991378	TRUE	LGarciaAlonso
ACVR_1A2B_receptor	Inhibin_ligand_A			curated	PMID:22710174;PMID:22991378	TRUE	LGarciaAlonso
ACVR_1C2B_receptor	Inhibin_ligand_A			curated	PMID:22710174;PMID:22991378	TRUE	LGarciaAlonso
ACVR_1B2A_receptor	Inhibin_ligand_B			curated	PMID:22710174;PMID:22991378	TRUE	LGarciaAlonso
ACVR_1A2A_receptor	Inhibin_ligand_B			curated	PMID:22710174;PMID:22991378	TRUE	LGarciaAlonso
ACVR_1B2B_receptor	Inhibin_ligand_B			curated	PMID:22710174;PMID:22991378	TRUE	LGarciaAlonso
ACVR_1C2A_receptor	Inhibin_ligand_B			curated	PMID:22710174;PMID:22991378	TRUE	LGarciaAlonso
ACVR_1A2B_receptor	Inhibin_ligand_B			curated	PMID:22710174;PMID:22991378	TRUE	LGarciaAlonso
ACVR_1C2B_receptor	Inhibin_ligand_B			curated	PMID:22710174;PMID:22991378	TRUE	LGarciaAlonso
Q6UW32	Q9H665	IGFL1_HUMAN	IGFR1_HUMAN	curated	uniprot	TRUE	LGarciaAlonso
Q6UWQ7	Q9H665	IGFL2_HUMAN	IGFR1_HUMAN	curated	uniprot	TRUE	LGarciaAlonso
Q6UXB1	Q9H665	IGFL3_HUMAN	IGFR1_HUMAN	curated	uniprot	TRUE	LGarciaAlonso
Q9GZT5	FZD1_LRP5	WN10A_HUMAN		curated	PMID:28733458	TRUE	LGarciaAlonso					low affinity interaction
Q9GZT5	FZD1_LRP6	WN10A_HUMAN		curated	PMID:28733458	TRUE	LGarciaAlonso					low affinity interaction
Q9GZT5	FZD5_LRP5	WN10A_HUMAN		curated	PMID:28733458	TRUE	LGarciaAlonso					low affinity interaction
Q9GZT5	FZD5_LRP6	WN10A_HUMAN		curated	PMID:28733458	TRUE	LGarciaAlonso					low affinity interaction
Q9GZT5	FZD8_LRP5	WN10A_HUMAN		curated	PMID:28733458	TRUE	LGarciaAlonso					low affinity interaction
Q9GZT5	FZD8_LRP6	WN10A_HUMAN		curated	PMID:28733458	TRUE	LGarciaAlonso					low affinity interaction
Q9GZT5	Q92765	WN10A_HUMAN	SFRP3_HUMAN	curated	PMID:29979633	TRUE	LGarciaAlonso					Inhibition WNT. Soluble proteins
Q9GZT5	FZD7_LRP5	WN10A_HUMAN		curated	PMID:28733458	TRUE	LGarciaAlonso					low affinity interaction
Q9GZT5	FZD7_LRP6	WN10A_HUMAN		curated	PMID:28733458	TRUE	LGarciaAlonso					low affinity interaction
P00749	Q03405	UROK_HUMAN	UPAR_HUMAN	curated	uniprot	TRUE	LGarciaAlonso
O00584	Q9NR97	RNT2_HUMAN	TLR8_HUMAN	curated	uniprot	TRUE	MCSanchoSerra
Q5ZPR3	Q5T2D2	CD276_HUMAN	TRML2_HUMAN	curated	uniprot	TRUE	MCSanchoSerra
Q14393	Q06418	GAS6_HUMAN	TYRO3_HUMAN	curated	uniprot	TRUE	MCSanchoSerra
O00294	Q06418	TULP1_HUMAN	TYRO3_HUMAN	curated	uniprot	TRUE	MCSanchoSerra
O95631	Q6ZN94	NET1_HUMAN	UNC5A_HUMAN	curated	uniprot	TRUE	MCSanchoSerra
O95631	Q8IZJ1	NET1_HUMAN	UNC5B_HUMAN	curated	uniprot	TRUE	MCSanchoSerra
O95631	O95185	NET1_HUMAN	UNC5C_HUMAN	curated	uniprot	TRUE	MCSanchoSerra
Q9HB63	Q6UXZ4	NET4_HUMAN	UNC5D_HUMAN	curated	uniprot	TRUE	MCSanchoSerra
Q765I0	Q9UKP6	UTS2B_HUMAN	UR2R_HUMAN	curated	uniprot;reactome	TRUE	MCSanchoSerra
P78509	P98155	RELN_HUMAN	VLDLR_HUMAN	curated	uniprot	TRUE	MCSanchoSerra

## Sheet: novel_complexes
complex_name	uniprot_1	uniprot_2	uniprot_3	uniprot_4	transmembrane	peripheral	secreted	secreted_desc	secreted_highlight	receptor	receptor_desc	integrin	other	other_desc	pdb_id	pdb_structure	stoichiometry	comments_complex	reactome_reaction	reactome_complex	complexPortal_complex	rhea_reaction	curator
12oxoLeukotrieneB4_byPTGR1	Q14914				FALSE	FALSE	TRUE	CHEBI:27814	TRUE	FALSE		FALSE	TRUE	biosynthesis_enzyme		FALSE			R-HSA-2161567			RHEA:50609	LGarciaAlonso
22Hydroxycholesterol_byCYP11A1	P05108				FALSE	FALSE	TRUE	CHEBI:67237	TRUE	FALSE		FALSE	TRUE	biosynthesis_enzyme		FALSE						RHEA:34340;RHEA:34335	LGarciaAlonso
22Hydroxycholesterol_byCYP3A4	P08684				FALSE	FALSE	TRUE	CHEBI:67237	TRUE	FALSE		FALSE	TRUE	biosynthesis_enzyme		FALSE						RHEA:46140	LGarciaAlonso
2arachidonoylglycerol_byDAGLA	Q9Y4D2				FALSE	FALSE	TRUE	CHEBI:52392	TRUE	FALSE		FALSE	TRUE	biosynthesis_enzyme		FALSE				R-HSA-426032			LGarciaAlonso
2arachidonoylglycerol_byDAGLB	Q8NCG7				FALSE	FALSE	TRUE	CHEBI:52392	TRUE	FALSE		FALSE	TRUE	biosynthesis_enzyme		FALSE				R-HSA-426032			LGarciaAlonso
5alphaDihydroprogesterone_byDHRS9	Q9BPW9				FALSE	FALSE	TRUE	CHEBI:28952	TRUE	FALSE		FALSE	TRUE	biosynthesis_enzyme		FALSE						RHEA:41988	LGarciaAlonso
5SHpETE_byALOX5	P09917	Q16873	P20292		FALSE	FALSE	TRUE	CHEBI:15632	TRUE	FALSE		FALSE	TRUE	biosynthesis_enzyme		FALSE			R-HSA-265296			RHEA:17486	LGarciaAlonso
Acetylcholine_byCHAT	P28329				FALSE	FALSE	TRUE	CHEBI:15355	TRUE	FALSE		FALSE	TRUE	biosynthesis_enzyme		FALSE			R-HSA-264622			RHEA:18822	LGarciaAlonso
AcetylcholineReceptor_a2b3	Q15822	Q05901			TRUE	FALSE	FALSE		FALSE	TRUE		FALSE	FALSE			FALSE				R-HSA-633846			LGarciaAlonso
AcetylcholineReceptor_a3b2a5	P32297	P17787	P30532		TRUE	FALSE	FALSE		FALSE	TRUE		FALSE	FALSE			FALSE				R-HSA-629584			LGarciaAlonso
AcetylcholineReceptor_a3b4	P32297	P30926			TRUE	FALSE	FALSE		FALSE	TRUE		FALSE	FALSE			FALSE				R-HSA-629575			LGarciaAlonso
AcetylcholineReceptor_a3b4a5	P32297	P30926	P30532		TRUE	FALSE	FALSE		FALSE	TRUE		FALSE	FALSE			FALSE				R-HSA-629582			LGarciaAlonso
AcetylcholineReceptor_a4b2	P43681	P17787			TRUE	FALSE	FALSE		FALSE	TRUE		FALSE	FALSE			FALSE				R-HSA-532625			LGarciaAlonso
AcetylcholineReceptor_a6a4b3	Q15825	P43681	Q05901		TRUE	FALSE	FALSE		FALSE	TRUE		FALSE	FALSE			FALSE				R-HSA-633773			LGarciaAlonso
AcetylcholineReceptor_a6b3b4	Q15825	Q05901	P30926		TRUE	FALSE	FALSE		FALSE	TRUE		FALSE	FALSE			FALSE				R-HSA-549002			LGarciaAlonso
Inhibin_ligand_A	P08476	P05111			FALSE	FALSE	TRUE	TGFb	TRUE	FALSE		FALSE	FALSE			FALSE							RVentoTormo
Inhibin_ligand_B	P09529	P05111			FALSE	FALSE	TRUE	TGFb	TRUE	FALSE		FALSE	FALSE			FALSE							RVentoTormo
ACVL1_ACVR2A	P37023	P27037			TRUE	FALSE	FALSE		FALSE	TRUE		FALSE	FALSE			FALSE							LGarciaAlonso
AldosteroneCorticosterone_byCYP11B2	P19099				FALSE	FALSE	TRUE	CHEBI:27584;CHEBI:16827	TRUE	FALSE		FALSE	TRUE	biosynthesis_enzyme		FALSE			R-HSA-193965			RHEA:50792	LGarciaAlonso
AMY1_receptor	P30988	O60894			TRUE	FALSE	FALSE		FALSE	TRUE		FALSE	FALSE			FALSE							LGarciaAlonso
AMY2_receptor	P30988	O60895			TRUE	FALSE	FALSE		FALSE	TRUE		FALSE	FALSE			FALSE							LGarciaAlonso
AMY3_receptor	P30988	O60896			TRUE	FALSE	FALSE		FALSE	TRUE		FALSE	FALSE			FALSE							LGarciaAlonso
Androstenedione_byCYP17A1	P05093				FALSE	FALSE	TRUE	CHEBI:16422	TRUE	FALSE		FALSE	TRUE	biosynthesis_enzyme		FALSE			R-HSA-193099			RHEA:14753	LGarciaAlonso
Androsterone_byHSD17B6	O14756				FALSE	FALSE	TRUE	CHEBI:16032	TRUE	FALSE		FALSE	TRUE	biosynthesis_enzyme		FALSE		uniprot;PMID:10896656;PMID:11360992					LGarciaAlonso
atRetinoicAcid_byALDH1A1	P00352				FALSE	FALSE	TRUE	CHEBI:15367	TRUE	FALSE		FALSE	TRUE	biosynthesis_enzyme		FALSE			R-HSA-5362522			RHEA:42081	LGarciaAlonso
atRetinoicAcid_byALDH1A2	O94788				FALSE	FALSE	TRUE	CHEBI:15367	TRUE	FALSE		FALSE	TRUE	biosynthesis_enzyme		FALSE			R-HSA-5362522			RHEA:42081	LGarciaAlonso
atRetinoicAcid_byALDH1A3	P47895				FALSE	FALSE	TRUE	CHEBI:15367	TRUE	FALSE		FALSE	TRUE	biosynthesis_enzyme		FALSE			R-HSA-5362522			RHEA:42081	LGarciaAlonso
BCR_CD45_CD22	P11274	P08575	P20273		TRUE	FALSE	FALSE		FALSE	TRUE		FALSE	FALSE			FALSE							LGarciaAlonso
BetaKlotho_FGFR4	P22455	Q86Z14			TRUE	FALSE	FALSE		FALSE	FALSE		FALSE	FALSE			FALSE							LGarciaAlonso
BMP9_BMP15	Q9UK05	O95972			FALSE	FALSE	TRUE		TRUE	FALSE		FALSE	FALSE			FALSE							LGarciaAlonso
BMPR1B_BMPR2_ACVR1B	O00238	Q13873	P36896		TRUE	FALSE	FALSE		FALSE	TRUE	TGFBeta_receptor_add	FALSE	FALSE			FALSE		Serine_threonine_kinase_heterodimer_upon_ligand_binding					LGarciaAlonso
Calcitriol_byCYP27B1	O15528				FALSE	FALSE	TRUE	CHEBI:17823	TRUE	FALSE		FALSE	TRUE	biosynthesis_enzyme		FALSE			R-HSA-209868			RHEA:20574	LGarciaAlonso
CatSperChannel1b	Q8NEC5	Q9H7T0			TRUE	FALSE	FALSE		FALSE	TRUE		FALSE	FALSE			FALSE				R-HSA-2534382			LGarciaAlonso
CatSperChannel1dg	Q8NEC5	Q86XM0			TRUE	FALSE	FALSE		FALSE	TRUE		FALSE	FALSE			FALSE				R-HSA-2534382			LGarciaAlonso
CatSperChannel2b	Q96P56	Q9H7T0			TRUE	FALSE	FALSE		FALSE	TRUE		FALSE	FALSE			FALSE				R-HSA-2534382			LGarciaAlonso
CatSperChannel2dg	Q96P56	Q86XM0			TRUE	FALSE	FALSE		FALSE	TRUE		FALSE	FALSE			FALSE				R-HSA-2534382			LGarciaAlonso
CatSperChannel3b	Q86XQ3	Q9H7T0			TRUE	FALSE	FALSE		FALSE	TRUE		FALSE	FALSE			FALSE				R-HSA-2534382			LGarciaAlonso
CatSperChannel3dg	Q86XQ3	Q86XM0			TRUE	FALSE	FALSE		FALSE	TRUE		FALSE	FALSE			FALSE				R-HSA-2534382			LGarciaAlonso
CatSperChannel4b	Q7RTX7	Q9H7T0			TRUE	FALSE	FALSE		FALSE	TRUE		FALSE	FALSE			FALSE				R-HSA-2534382			LGarciaAlonso
CatSperChannel4dg	Q7RTX7	Q86XM0			TRUE	FALSE	FALSE		FALSE	TRUE		FALSE	FALSE			FALSE				R-HSA-2534382			LGarciaAlonso
Cholesterol_byCEL	P19835				FALSE	FALSE	TRUE	CHEBI:16113	TRUE	FALSE		FALSE	TRUE	biosynthesis_enzyme		FALSE			R-HSA-192417			RHEA:33875	LGarciaAlonso
Cholesterol_byDHCR24	Q15392				FALSE	FALSE	TRUE	CHEBI:16113	TRUE	FALSE		FALSE	TRUE	biosynthesis_enzyme		FALSE			R-HSA-196417			RHEA:36393	LGarciaAlonso
Cholesterol_byDHCR7	Q9UBM7				FALSE	FALSE	TRUE	CHEBI:16113	TRUE	FALSE		FALSE	TRUE	biosynthesis_enzyme		FALSE			R-HSA-6807055			RHEA:23986	LGarciaAlonso
Cholesterol_byLIPA	P38571				FALSE	FALSE	TRUE	CHEBI:16113	TRUE	FALSE		FALSE	TRUE	biosynthesis_enzyme		FALSE			R-HSA-8865667			RHEA:10100	LGarciaAlonso
Corticosterone_byCYP11B1	P15538				FALSE	FALSE	TRUE	CHEBI:16827	TRUE	FALSE		FALSE	TRUE	biosynthesis_enzyme		FALSE			R-HSA-194017			RHEA:46104	LGarciaAlonso
Cortisone_byHSD11B1	P28845				FALSE	FALSE	TRUE	CHEBI:16962	TRUE	FALSE		FALSE	TRUE	biosynthesis_enzyme		FALSE			R-HSA-194023				LGarciaAlonso
CUBN_AMN_complex	Q9BXJ7	O60494			TRUE	FALSE	FALSE		FALSE	TRUE		FALSE	FALSE			FALSE				R-HSA-264830			LGarciaAlonso
Epinephrine_byPNMT	P11086				FALSE	FALSE	TRUE	CHEBI:28918	TRUE	FALSE		FALSE	TRUE	biosynthesis_enzyme		FALSE			R-HSA-209903				LGarciaAlonso
Estradiol_byCYP19A1	P11511				FALSE	FALSE	TRUE	CHEBI:16469	TRUE	FALSE		FALSE	TRUE	biosynthesis_enzyme		FALSE			R-HSA-193143			RHEA:38191	LGarciaAlonso
Estradiol_byHSD17B1	P14061				FALSE	FALSE	TRUE	CHEBI:16469	TRUE	FALSE		FALSE	TRUE	biosynthesis_enzyme		FALSE			R-HSA-804969				LGarciaAlonso
Estrone_byHSD17B2	P37059				FALSE	FALSE	TRUE	CHEBI:17263	TRUE	FALSE		FALSE	TRUE	biosynthesis_enzyme		FALSE			R-HSA-8862137			RHEA:24612;RHEA:24616	LGarciaAlonso
FDZ8_RYK	P34925	Q9H461			TRUE	FALSE	FALSE		FALSE	TRUE		FALSE	FALSE			FALSE							LGarciaAlonso
Follitropin	P01215	P01225			FALSE	FALSE	TRUE		TRUE	FALSE		FALSE	FALSE			FALSE				R-HSA-378947			LGarciaAlonso
FZD1_LRP5	O75197	Q9UP38			TRUE	FALSE	FALSE		FALSE	FALSE		FALSE	FALSE			FALSE							LGarciaAlonso
FZD1_LRP6	O75581	Q9UP38			TRUE	FALSE	FALSE		FALSE	FALSE		FALSE	FALSE			FALSE							LGarciaAlonso
FZD10_LRP5	O75197	Q9ULW2			TRUE	FALSE	FALSE		FALSE	FALSE		FALSE	FALSE			FALSE							LGarciaAlonso
FZD10_LRP6	O75581	Q9ULW2			TRUE	FALSE	FALSE		FALSE	FALSE		FALSE	FALSE			FALSE							LGarciaAlonso
FZD2_LRP5	O75197	Q14332			TRUE	FALSE	FALSE		FALSE	FALSE		FALSE	FALSE			FALSE							LGarciaAlonso
FZD2_LRP6	O75581	Q14332			TRUE	FALSE	FALSE		FALSE	FALSE		FALSE	FALSE			FALSE							LGarciaAlonso
FZD3_LRP5	O75197	Q9NPG1			TRUE	FALSE	FALSE		FALSE	FALSE		FALSE	FALSE			FALSE							LGarciaAlonso
FZD3_LRP6	O75581	Q9NPG1			TRUE	FALSE	FALSE		FALSE	FALSE		FALSE	FALSE			FALSE							LGarciaAlonso
FZD4_LRP5	O75197	Q9ULV1			TRUE	FALSE	FALSE		FALSE	FALSE		FALSE	FALSE			FALSE							LGarciaAlonso
FZD4_LRP6	O75581	Q9ULV1			TRUE	FALSE	FALSE		FALSE	FALSE		FALSE	FALSE			FALSE							LGarciaAlonso
FZD5_LRP5	O75197	Q13467			TRUE	FALSE	FALSE		FALSE	FALSE		FALSE	FALSE			FALSE							LGarciaAlonso
FZD5_LRP6	O75581	Q13467			TRUE	FALSE	FALSE		FALSE	FALSE		FALSE	FALSE			FALSE							LGarciaAlonso
FZD6_LRP5	O75197	O60353			TRUE	FALSE	FALSE		FALSE	FALSE		FALSE	FALSE			FALSE							LGarciaAlonso
FZD6_LRP6	O75581	O60353			TRUE	FALSE	FALSE		FALSE	FALSE		FALSE	FALSE			FALSE							LGarciaAlonso
FZD7_LRP5	O75197	O75084			TRUE	FALSE	FALSE		FALSE	FALSE		FALSE	FALSE			FALSE							LGarciaAlonso
FZD7_LRP6	O75581	O75084			TRUE	FALSE	FALSE		FALSE	FALSE		FALSE	FALSE			FALSE							LGarciaAlonso
FZD8_LRP5	O75197	Q9H461			TRUE	FALSE	FALSE		FALSE	FALSE		FALSE	FALSE			FALSE							LGarciaAlonso
FZD8_LRP6	O75581	Q9H461			TRUE	FALSE	FALSE		FALSE	FALSE		FALSE	FALSE			FALSE							LGarciaAlonso
FZD9_LRP5	O75197	O00144			TRUE	FALSE	FALSE		FALSE	FALSE		FALSE	FALSE			FALSE							LGarciaAlonso
FZD9_LRP6	O75581	O00144			TRUE	FALSE	FALSE		FALSE	FALSE		FALSE	FALSE			FALSE							LGarciaAlonso
GALR1	P47211	Q8TDV0			TRUE	FALSE	FALSE		FALSE	TRUE		FALSE	FALSE			FALSE							LGarciaAlonso
GALR2	O43603	Q8TDV0			TRUE	FALSE	FALSE		FALSE	TRUE		FALSE	FALSE			FALSE							LGarciaAlonso
GALR3	O60755	Q8TDV0			TRUE	FALSE	FALSE		FALSE	TRUE		FALSE	FALSE			FALSE							LGarciaAlonso
GammaSecretase_APH1A_PSEN1	Q92542	Q9NZ42	Q96BI3	P49768	TRUE	FALSE	FALSE		FALSE	TRUE		FALSE	FALSE			FALSE				R-HSA-157343	CPX_2176		LGarciaAlonso
GammaSecretase_APH1A_PSEN2	Q92542	Q9NZ42	Q96BI3	P49810	TRUE	FALSE	FALSE		FALSE	TRUE		FALSE	FALSE			FALSE				R-HSA-157343	CPX_4231		LGarciaAlonso
GammaSecretase_APH1B_PSEN1	Q92542	Q9NZ42	Q8WW43	P49768	TRUE	FALSE	FALSE		FALSE	TRUE		FALSE	FALSE			FALSE				R-HSA-157343	CPX_4233		LGarciaAlonso
GammaSecretase_APH1B_PSEN2	Q92542	Q9NZ42	Q8WW43	P49810	TRUE	FALSE	FALSE		FALSE	TRUE		FALSE	FALSE			FALSE				R-HSA-157343	CPX_4232		LGarciaAlonso
glyco_Lutropin	P01215	P01229			FALSE	FALSE	TRUE		TRUE	FALSE		FALSE	FALSE			FALSE				R-HSA-378969			LGarciaAlonso
Histamine_byHDC	P19113				FALSE	FALSE	TRUE	CHEBI:18295	TRUE	FALSE		FALSE	TRUE	biosynthesis_enzyme		FALSE			R-HSA-977301			RHEA:20841	LGarciaAlonso
IGF1R_enhancerComGPC3	P08069	P51654			TRUE	FALSE	FALSE		FALSE	TRUE		FALSE	FALSE			FALSE							LGarciaAlonso
Klotho_FGFR1	P11362	Q9UEF7			TRUE	FALSE	FALSE		FALSE	FALSE		FALSE	FALSE			FALSE							LGarciaAlonso
Kremen1_LRP6	Q96MU8	O75581			TRUE	FALSE	FALSE		FALSE	FALSE		FALSE	FALSE			FALSE							LGarciaAlonso
Kremen2_LRP6	Q8NCW0	O75581			TRUE	FALSE	FALSE		FALSE	FALSE		FALSE	FALSE			FALSE							LGarciaAlonso
LAT1_transporter	Q01650	P08195			TRUE	FALSE	FALSE		FALSE	FALSE		FALSE	FALSE			FALSE		Located_to_the_plasma_membrane_bySLC3A2_4F2hc					RVentoTormo
Ldopa_byTYR	P14679				FALSE	FALSE	TRUE	CHEBI:15765	TRUE	FALSE		FALSE	TRUE	biosynthesis_enzyme		FALSE						RHEA:34287	LGarciaAlonso
leucine_rich_complex	Q6PJG9	Q96NI6			TRUE	FALSE	FALSE		FALSE	FALSE		FALSE	TRUE	Others		FALSE		Can_form_heteromeric_complexes_with_LRFN1,_LRFN2,_LRFN3_and_LRFN5					RVentoTormo
LeukotrieneB4_byLTA4H	P09960				FALSE	FALSE	TRUE	CHEBI:15647	TRUE	FALSE		FALSE	TRUE	biosynthesis_enzyme		FALSE			R-HSA-266072			RHEA:22325	LGarciaAlonso
LeukotrieneC4_byLTC4S	P20292	P09917	Q16873		FALSE	FALSE	TRUE	CHEBI:16978	TRUE	FALSE		FALSE	TRUE	biosynthesis_enzyme		FALSE			R-HSA-266050			RHEA:17619	LGarciaAlonso
LeukotrieneD4_byGGT1	P19440	P36269			FALSE	FALSE	TRUE	CHEBI:28666	TRUE	FALSE		FALSE	TRUE	biosynthesis_enzyme		FALSE			R-HSA-266046			RHEA:31564	LGarciaAlonso
LeukotrieneE4_byDPEP1	P16444				FALSE	FALSE	TRUE	CHEBI:15650	TRUE	FALSE		FALSE	TRUE	biosynthesis_enzyme		FALSE			R-HSA-266012			RHEA:48617	LGarciaAlonso
LeukotrieneE4_byDPEP2	Q9H4A9				FALSE	FALSE	TRUE	CHEBI:15650	TRUE	FALSE		FALSE	TRUE	biosynthesis_enzyme		FALSE			R-HSA-266012			RHEA:48617	LGarciaAlonso
LeukotrieneE4_byDPEP3	Q9H4B8				FALSE	FALSE	TRUE	CHEBI:15650	TRUE	FALSE		FALSE	TRUE	biosynthesis_enzyme		FALSE			R-HSA-266012			RHEA:48617	LGarciaAlonso
LIFR	P42702	P40189			TRUE	FALSE	FALSE		FALSE	TRUE	Cytokine_receptor_IL6_family	FALSE	FALSE			FALSE		Heterodimer_composed_of_LIFR_and_IL6ST					RVentoTormo
LipoxinA4_byALOX12	P18054				FALSE	FALSE	TRUE	CHEBI:6498	TRUE	FALSE		FALSE	TRUE	biosynthesis_enzyme		FALSE			R-HSA-2161775			RHEA:48584	LGarciaAlonso
LipoxinA4_byALOX5	P09917	P20292	Q16873		FALSE	FALSE	TRUE	CHEBI:6498	TRUE	FALSE		FALSE	TRUE	biosynthesis_enzyme		FALSE			R-HSA-2161917				LGarciaAlonso
LRC52_complex	Q8N7C0	A8MYU2			TRUE	FALSE	FALSE		FALSE	TRUE		FALSE	FALSE			FALSE		Expression_at_the_cell_surface_may_require_the_presence_of_KCNU1					RVentoTormo
LRFN2LRFN3_complex	Q9ULH4	Q9BTN0			TRUE	FALSE	FALSE		FALSE	FALSE		FALSE	FALSE			FALSE		Forms_heteromeric_complexes_with_LRFN1,_LRFN3,_LRFN4_and_LRFN5					RVentoTormo
LRFN2LRFN4_complex	Q9ULH4	Q6PJG9			TRUE	FALSE	FALSE		FALSE	FALSE		FALSE	FALSE			FALSE		Forms_heteromeric_complexes_with_LRFN1,_LRFN3,_LRFN4_and_LRFN5					RVentoTormo
LRFN2LRFN5_complex	Q9ULH4	Q96NI6			TRUE	FALSE	FALSE		FALSE	FALSE		FALSE	FALSE			FALSE		Forms_heteromeric_complexes_with_LRFN1,_LRFN3,_LRFN4_and_LRFN5					RVentoTormo
LRFN3LRFN4_complex	Q9BTN0	Q6PJG9			TRUE	FALSE	FALSE		FALSE	FALSE		FALSE	FALSE			FALSE		Can_form_heteromeric_complexes_with_LRFN1,_LRFN2,_LRFN4_and_LRFN5					RVentoTormo
LRFN3LRFN5_complex	Q9BTN0	Q96NI6			TRUE	FALSE	FALSE		FALSE	FALSE		FALSE	FALSE			FALSE		Can_form_heteromeric_complexes_with_LRFN1,_LRFN2,_LRFN4_and_LRFN5					RVentoTormo
LRP4_MUSK_complex	O15146	O75096			TRUE	FALSE	FALSE		FALSE	TRUE		FALSE	FALSE		3ml4	partial	DOK7;DOK7;MUSK;MUSK	MUSK_Interacts_with_LRP4;_the_heterodimer_forms_an_AGRIN_receptor_complex_that_binds_AGRIN_resulting_in_activation_of_MUSK					RVentoTormo
Lthyroxine_byTPO	P07202				FALSE	FALSE	TRUE	CHEBI:18332	TRUE	FALSE		FALSE	TRUE	biosynthesis_enzyme		FALSE			R-HSA-209840				LGarciaAlonso
Melatonin_byASMT	P46597				FALSE	FALSE	TRUE	CHEBI:16796	TRUE	FALSE		FALSE	TRUE	biosynthesis_enzyme		FALSE			R-HSA-209821			RHEA:15573	LGarciaAlonso
MIS_receptor_1	Q16671	P36894			TRUE	FALSE	FALSE		FALSE	TRUE		FALSE	FALSE			FALSE							RVentoTormo
MIS_receptor_2	Q16671	O00238			TRUE	FALSE	FALSE		FALSE	TRUE		FALSE	FALSE			FALSE							RVentoTormo
MIS_receptor_3	Q16671	Q04771			TRUE	FALSE	FALSE		FALSE	TRUE		FALSE	FALSE			FALSE							RVentoTormo
MR1_complex	P61769	P61769	Q95460		TRUE	FALSE	FALSE		FALSE	TRUE		FALSE	FALSE		4gup	TRUE	B2M;MR1	Heterodimerizes_with_B2M,_this_interaction_is_required_for_surface_expression					RVentoTormo
NCR1_receptor	O76036	P20963	P30273		TRUE	FALSE	FALSE		FALSE	TRUE		FALSE	TRUE	NK_receptor_recognition		FALSE		Interacts_with_CD247_and_FCER1G					RVentoTormo
NCR2_receptor	O95944	O43914			TRUE	FALSE	FALSE		FALSE	TRUE		FALSE	TRUE	NK_receptor_recognition		FALSE		Interacts_with_TYROBP_DAP12					RVentoTormo
NCR3_receptor	O14931	P20963			TRUE	FALSE	FALSE		FALSE	TRUE		FALSE	TRUE	NK_receptor_recognition		FALSE		Interacts_with_CD3Z					RVentoTormo
NKG2D_II_receptor	P26718	Q9UBK5			TRUE	FALSE	FALSE		FALSE	TRUE	hematopoyetic_receptor	FALSE	FALSE			FALSE		Heterohexamer_composed_of_two_subunits_of_KLRK1_and_four_subunits_of_HCST_DAP10					RVentoTormo
NODAL_receptor_IbIIa_CFC1	P36896	P27037	P0CG37		TRUE	FALSE	FALSE		FALSE	TRUE		FALSE	FALSE			FALSE				R-HSA-1181125			LGarciaAlonso
NODAL_receptor_IbIIa_TDGF1	P36896	P27037	P13385		TRUE	FALSE	FALSE		FALSE	TRUE		FALSE	FALSE			FALSE				R-HSA-1181125			LGarciaAlonso
NODAL_receptor_IbIIb_CFC1	P36896	Q13705	P0CG37		TRUE	FALSE	FALSE		FALSE	TRUE		FALSE	FALSE			FALSE							LGarciaAlonso
NODAL_receptor_IbIIb_TDGF1	P36896	Q13705	P13385		TRUE	FALSE	FALSE		FALSE	TRUE		FALSE	FALSE			FALSE							RVentoTormo
NODAL_receptor_IcIIb_CFC1	Q8NER5	Q13705	P0CG37		TRUE	FALSE	FALSE		FALSE	TRUE		FALSE	FALSE			FALSE				R-HSA-1181125			LGarciaAlonso
NODAL_receptor_IcIIb_TDGF1	Q8NER5	Q13705	P13385		TRUE	FALSE	FALSE		FALSE	TRUE		FALSE	FALSE			FALSE				R-HSA-1181125			LGarciaAlonso
Noradrenaline_byDBH	P09172				FALSE	FALSE	TRUE	CHEBI:18357	TRUE	FALSE		FALSE	TRUE	biosynthesis_enzyme		FALSE			R-HSA-209891				LGarciaAlonso
opioid_receptor_A	P35372	P08913			TRUE	FALSE	FALSE		FALSE	TRUE		FALSE	FALSE			FALSE		Forms_homooligomers_and_heterooligomers_with_other_GPCRs,_such_as_ADRA2A_(probably_in_dimeric_forms)					RVentoTormo
opioid_receptor_C	P35372	P21554			TRUE	FALSE	FALSE		FALSE	TRUE		FALSE	FALSE			FALSE		Forms_homooligomers_and_heterooligomers_with_other_GPCRs,_such_as_CNR1_(probably_in_dimeric_forms)					RVentoTormo
opioid_receptor_CCR5	P35372	P51681			TRUE	FALSE	FALSE		FALSE	TRUE		FALSE	FALSE			FALSE		Forms_homooligomers_and_heterooligomers_with_other_GPCRs,_such_as_CCR5_(probably_in_dimeric_forms)					RVentoTormo
opioid_receptor_D_1	P35372	P41143	Q96DX8		TRUE	FALSE	FALSE		FALSE	TRUE		FALSE	FALSE			FALSE		Interacts_with_RTP4;_the_interaction_promotes_cell_surface_localization_of_the_OPRD1_OPRM1_heterodimer_(bysimilarity)					RVentoTormo
opioid_receptor_GMP6A	P35372	P51674			TRUE	FALSE	FALSE		FALSE	TRUE		FALSE	FALSE			FALSE		Interacts_with_OPRM1					RVentoTormo
opioid_receptor_K_1	P35372	P41145			TRUE	FALSE	FALSE		FALSE	TRUE		FALSE	FALSE			FALSE		Forms_homooligomers_and_heterooligomers_with_other_GPCRs,_such_as_OPRK1_(probably_in_dimeric_forms)					RVentoTormo
opioid_receptor_L_1	P35372	P41146			TRUE	FALSE	FALSE		FALSE	TRUE		FALSE	FALSE			FALSE		Forms_homooligomers_and_heterooligomers_with_other_GPCRs,_such_as_OPRL1_(probably_in_dimeric_forms)					RVentoTormo
opioid_receptor_N	P35372	Q9Y5X5			TRUE	FALSE	FALSE		FALSE	TRUE		FALSE	FALSE			FALSE		Forms_homooligomers_and_heterooligomers_with_other_GPCRs,_such_as_NPFFR2_(probably_in_dimeric_forms)					RVentoTormo
opioid_receptor_S	P35372	P30874			TRUE	FALSE	FALSE		FALSE	TRUE		FALSE	FALSE			FALSE		Forms_homooligomers_and_heterooligomers_with_other_GPCRs,_such_as_SSTR2_(probably_in_dimeric_forms)					RVentoTormo
OSMR	Q99650	P40189			TRUE	FALSE	FALSE		FALSE	TRUE	Cytokine_receptor_IL6_family	FALSE	FALSE			FALSE		Heterodimer_composed_of_OSMR_and_IL6ST_(type_II_OSM_receptor)					RVentoTormo
P2X7_receptor_Pannexin1_complex	Q96RD7	Q99572			TRUE	FALSE	FALSE		FALSE	TRUE		FALSE	FALSE			FALSE		PMID:_18596211					RVentoTormo
PCDH15_complex	Q96QU1	Q8TAF8			TRUE	FALSE	FALSE		FALSE	FALSE		FALSE	FALSE			FALSE		Efficient_localization_to_the_plasma_membrane_requires_the_presence_of_LHFPL5					RVentoTormo
PDGFR_complex	P16234	P09619			TRUE	FALSE	FALSE		FALSE	TRUE	growth_factor_receptor	FALSE	FALSE			FALSE		heterodimers_formed_byPDGFA_and_PDGFB					RVentoTormo
PK1L1PK2L1_complex	Q8TDX9	Q9P0L9			TRUE	FALSE	FALSE		FALSE	FALSE		FALSE	FALSE			FALSE		Forms_a_heterodimer_with_PKD2L1_in_primary_cilia_and_forms_a_calcium_permeant_ciliary_channel					RVentoTormo
PK1L1PKD2_complex	Q8TDX9	Q13563			TRUE	FALSE	FALSE		FALSE	FALSE		FALSE	FALSE			FALSE		forms_a_complex_with_PKD2_in_cilia_to_facilitate_flow_detection_in_left_right_patterning					RVentoTormo
pL1:Ezrin	P15311	P32004			TRUE	FALSE	FALSE		FALSE	TRUE		FALSE	FALSE			FALSE				R-HSA-374575			LGarciaAlonso
PlexinA1_complex1	Q9UIW2	P35968			TRUE	FALSE	FALSE		FALSE	TRUE		FALSE	FALSE			FALSE		PMID:_22325954					RVentoTormo
PlexinA1_complex2	Q9UIW2	Q9NZC2	O43914		TRUE	FALSE	FALSE		FALSE	TRUE		FALSE	FALSE			FALSE		PMID:_22325954					RVentoTormo
PlexinA1_complex3	O14786	Q9UIW2			TRUE	FALSE	FALSE		FALSE	TRUE		FALSE	FALSE			FALSE		PMID:_22325954					RVentoTormo
PlexinA2_complex1	O14786	O75051			TRUE	FALSE	FALSE		FALSE	TRUE		FALSE	FALSE			FALSE		PMID:_22325954					RVentoTormo
PlexinA3_complex1	O14786	P51805			TRUE	FALSE	FALSE		FALSE	TRUE		FALSE	FALSE			FALSE		PMID:_22325954					RVentoTormo
PlexinA4_complex1	O14786	Q9HCM2			TRUE	FALSE	FALSE		FALSE	TRUE		FALSE	FALSE			FALSE		PMID:_22325954					RVentoTormo
PODXL_complex	O00592	O14745			TRUE	FALSE	FALSE		FALSE	FALSE		FALSE	TRUE	Migration		FALSE		Interacts_(via_the_PDZ_1_domain)_with_PODXL_(via_the_C_terminal_PDZ_binding_motif_DTHL);_the_interaction_take_place_early_in_the_secretory_pathway_and_is_necessary_for_its_apical_membrane_sorting_(bysimilarity)					RVentoTormo
Polycistin_complex_I	P98161	Q13563			TRUE	FALSE	FALSE		FALSE	FALSE		FALSE	FALSE			FALSE		PKD1_localization_to_the_plasma_and_ciliary_membranes_requires_PKD2					RVentoTormo
Polycistin_complex_II	Q9P0L9	P98161			TRUE	FALSE	FALSE		FALSE	FALSE		FALSE	FALSE			FALSE		Interaction_with_PKD1_or_PKD1L3_is_required_for_localization_to_the_cell_membrane					RVentoTormo
Polycistin_complex_III	Q9P0L9	Q7Z443			TRUE	FALSE	FALSE		FALSE	FALSE		FALSE	FALSE			FALSE		Interaction_with_PKD1_or_PKD1L3_is_required_for_localization_to_the_cell_membrane					RVentoTormo
potasium_complex	O00180	O95069			TRUE	FALSE	FALSE		FALSE	FALSE		FALSE	FALSE			FALSE		The_heterodimer_with_KCNK2_is_detected_at_the_astrocyte_cell_membrane					RVentoTormo
potasium_transporter_complex	P54707	Q9NV96			TRUE	FALSE	FALSE		FALSE	FALSE		FALSE	FALSE			FALSE		Exit_from_the_endoplasmic_reticulum_requires_the_presence_of_TMEM30A,_but_not_that_of_TMEM30B					RVentoTormo
potassium_complex	P16389	P22459			TRUE	FALSE	FALSE		FALSE	FALSE		FALSE	FALSE			FALSE		Coexpression_with_KCNA4_or_with_beta_subunits_promotes_expression_at_the_cell_membrane					RVentoTormo
Pregnenolone_byCYP11A1	P05108	Q6P4F2	P10109	P22570	FALSE	FALSE	TRUE	CHEBI:16581	TRUE	FALSE		FALSE	TRUE	biosynthesis_enzyme		FALSE			R-HSA-193101			RHEA:35739	LGarciaAlonso
Progesterone_byHSD3B1	P14060				FALSE	FALSE	TRUE	CHEBI:17026;CHEBI:16422;CHEBI:17252	TRUE	FALSE		FALSE	TRUE	biosynthesis_enzyme		FALSE			R-HSA-193052			RHEA:43928	LGarciaAlonso
Prostacyclin_byPTGIS	Q16647				FALSE	FALSE	TRUE	CHEBI:15552	TRUE	FALSE		FALSE	TRUE	biosynthesis_enzyme		FALSE			R-HSA-76496				LGarciaAlonso
ProstaglandinD2_byAKR1C3	P42330				FALSE	FALSE	TRUE	CHEBI:57406	TRUE	FALSE		FALSE	TRUE	biosynthesis_enzyme		FALSE						RHEA:10140	LGarciaAlonso
ProstaglandinE2_byPTGES	O14684				FALSE	FALSE	TRUE	CHEBI:15551	TRUE	FALSE		FALSE	TRUE	biosynthesis_enzyme		FALSE			R-HSA-2161660			RHEA:12894	LGarciaAlonso
ProstaglandinE2_byPTGES2	Q9H7Z7				FALSE	FALSE	TRUE	CHEBI:15551	TRUE	FALSE		FALSE	TRUE	biosynthesis_enzyme		FALSE			R-HSA-265295			RHEA:12894	LGarciaAlonso
ProstaglandinE2_byPTGES3	Q15185				FALSE	FALSE	TRUE	CHEBI:15551	TRUE	FALSE		FALSE	TRUE	biosynthesis_enzyme		FALSE			R-HSA-265295			RHEA:12894	LGarciaAlonso
ProstaglandinF2a_byAKR1B1	P15121				FALSE	FALSE	TRUE	CHEBI:15553	TRUE	FALSE		FALSE	TRUE	biosynthesis_enzyme		FALSE			R-HSA-2161549			RHEA:45314	LGarciaAlonso
ProstaglandinF2a_byCBR1	P16152				FALSE	FALSE	TRUE	CHEBI:15553	TRUE	FALSE		FALSE	TRUE	biosynthesis_enzyme		FALSE			R-HSA-2161651			RHEA:24510	LGarciaAlonso
ProstaglandinF2a_byPRXL2B	Q8TBF2				FALSE	FALSE	TRUE	CHEBI:15553	TRUE	FALSE		FALSE	TRUE	biosynthesis_enzyme		FALSE			R-HSA-2161612			RHEA:28214	LGarciaAlonso
ProstaglandinH2_byPTGS1	P23219				FALSE	FALSE	TRUE	CHEBI:57405	TRUE	FALSE		FALSE	TRUE	biosynthesis_enzyme		FALSE						RHEA:23729	LGarciaAlonso
ProstaglandinH2_byPTGS2	P35354				FALSE	FALSE	TRUE	CHEBI:57405	TRUE	FALSE		FALSE	TRUE	biosynthesis_enzyme		FALSE						RHEA:23729	LGarciaAlonso
PTCH_BOC_transmembrane_receptor	Q13635	Q9BWV1			TRUE	FALSE	FALSE		FALSE	TRUE		FALSE	FALSE			FALSE				R-HSA-5632584			LGarciaAlonso
PTCH_CDON_transmembrane_receptor	Q13635	Q4KMG0			TRUE	FALSE	FALSE		FALSE	TRUE		FALSE	FALSE			FALSE			R-HSA-5632652				LGarciaAlonso
PTCH_GAS1_transmembrane_receptor	Q13635	P54826			TRUE	FALSE	FALSE		FALSE	TRUE		FALSE	FALSE			FALSE			R-HSA-5632649				LGarciaAlonso
PTCH2_BOC_transmembrane_receptor	Q9Y6C5	Q9BWV1			TRUE	FALSE	FALSE		FALSE	TRUE		FALSE	FALSE			FALSE		PMID:25448692					LGarciaAlonso
PTCH2_CDON_transmembrane_receptor	Q9Y6C5	Q4KMG0			TRUE	FALSE	FALSE		FALSE	TRUE		FALSE	FALSE			FALSE		PMID:25448692					LGarciaAlonso
PTCH2_GAS1_transmembrane_receptor	Q9Y6C5	P54826			TRUE	FALSE	FALSE		FALSE	TRUE		FALSE	FALSE			FALSE		PMID:25448692					LGarciaAlonso
RAreceptor_RXRA	P19793	P29373			TRUE	FALSE	FALSE	FALSE	FALSE	TRUE	nuclear_receptor;needs transporter	FALSE	TRUE			FALSE				R-HSA-5334826			LGarciaAlonso
RAreceptor_RXRB	P28702	P29373			TRUE	FALSE	FALSE	FALSE	FALSE	TRUE	nuclear_receptor;needs transporter	FALSE	TRUE			FALSE				R-HSA-5334826			LGarciaAlonso
RAreceptor_RXRG	P48443	P29373			TRUE	FALSE	FALSE	FALSE	FALSE	TRUE	nuclear_receptor;needs transporter	FALSE	TRUE			FALSE				R-HSA-5334826			LGarciaAlonso
RAreceptor_RARA	P10276	P29373			TRUE	FALSE	FALSE	FALSE	FALSE	TRUE	nuclear_receptor;needs transporter	FALSE	TRUE			FALSE				R-HSA-5334826			LGarciaAlonso
RAreceptor_RARB	P10826	P29373			TRUE	FALSE	FALSE	FALSE	FALSE	TRUE	nuclear_receptor;needs transporter	FALSE	TRUE			FALSE				R-HSA-5334826			LGarciaAlonso
RAreceptor_RARG	P13631	P29373			TRUE	FALSE	FALSE	FALSE	FALSE	TRUE	nuclear_receptor;needs transporter	FALSE	TRUE			FALSE				R-HSA-5334826			LGarciaAlonso
RAreceptor_RARA_RXRA	P10276	P19793	P29373		TRUE	FALSE	FALSE	FALSE	FALSE	TRUE	nuclear_receptor;needs transporter	FALSE	TRUE			FALSE				R-HSA-5334826			LGarciaAlonso
RAreceptor_RARB_RXRB	P10826	P28702	P29373		TRUE	FALSE	FALSE	FALSE	FALSE	TRUE	nuclear_receptor;needs transporter	FALSE	TRUE			FALSE				R-HSA-5334826			LGarciaAlonso
RAreceptor_RARG:RXRG	P13631	P48443	P29373		TRUE	FALSE	FALSE	FALSE	FALSE	TRUE	nuclear_receptor;needs transporter	FALSE	TRUE			FALSE				R-HSA-5334826			LGarciaAlonso
ROR2_VANGL2	Q01974	Q9ULK5			TRUE	FALSE	FALSE		FALSE	TRUE		FALSE	FALSE			FALSE							LGarciaAlonso
SerotoninDopamin_byDDC	P20711				FALSE	FALSE	TRUE	CHEBI:28790	TRUE	FALSE		FALSE	TRUE	biosynthesis_enzyme		FALSE			R-HSA-209859			RHEA:18534	LGarciaAlonso
Testosterone_byAKR1D1	P51857				FALSE	FALSE	TRUE	CHEBI:17347	TRUE	FALSE		FALSE	TRUE	biosynthesis_enzyme		FALSE						RHEA:14983	LGarciaAlonso
Testosterone_byHSD17B12	Q53GQ0				FALSE	FALSE	TRUE	RAreceptor_RARG_RXRG	TRUE	FALSE		FALSE	TRUE	biosynthesis_enzyme		FALSE			R-HSA-193064			RHEA:14983	LGarciaAlonso
Testosterone_byHSD17B3	P37058				FALSE	FALSE	TRUE	CHEBI:17347	TRUE	FALSE		FALSE	TRUE	biosynthesis_enzyme		FALSE			R-HSA-193064			RHEA:14983	LGarciaAlonso
ThromboxaneA2_byTBXAS1	P24557				FALSE	FALSE	TRUE	CHEBI:15627	TRUE	FALSE		FALSE	TRUE	biosynthesis_enzyme		FALSE			R-HSA-76500			RHEA:17138	LGarciaAlonso
Thyrostimulin	Q86YW7	Q96T91			FALSE	FALSE	TRUE		TRUE	FALSE		FALSE	FALSE			FALSE				R-HSA-8942418			LGarciaAlonso
Thyrotropin	P01215	P01222			FALSE	FALSE	TRUE		TRUE	FALSE		FALSE	FALSE			FALSE				R-HSA-8942418			LGarciaAlonso
Triiodothyronine_byDIO3	P55073	P01266			FALSE	FALSE	TRUE	CHEBI:18258	TRUE	FALSE		FALSE	TRUE	biosynthesis_enzyme		FALSE							LGarciaAlonso

## Sheet: CellSign_receptor_TF_links
Receptor	TF	Source	Curator	Xrefs_or_figures	Brivanlou_class	Condition
ACVL1_ACVR2A	SMAD1	Uniprot;PMID:25136781	LGarciaAlonso	https://www.jbc.org/content/273/40/25628/F9.medium.gif	IIB3b_RL_signal_dependent_cytoplasmic
ACVL1_ACVR2A	SMAD5	Uniprot;PMID:25136781	LGarciaAlonso	https://www.jbc.org/content/273/40/25628/F9.medium.gif	IIB3b_RL_signal_dependent_cytoplasmic
ACVL1_ACVR2A	SMAD8	Uniprot;PMID:25136781	LGarciaAlonso	https://www.jbc.org/content/273/40/25628/F9.medium.gif	IIB3b_RL_signal_dependent_cytoplasmic
ACVL1_BMPR2	SMAD1	Uniprot;PMID:25136781	LGarciaAlonso	https://www.jbc.org/content/273/40/25628/F9.medium.gif	IIB3b_RL_signal_dependent_cytoplasmic
ACVL1_BMPR2	SMAD5	Uniprot;PMID:25136781	LGarciaAlonso	https://www.jbc.org/content/273/40/25628/F9.medium.gif	IIB3b_RL_signal_dependent_cytoplasmic
ACVL1_BMPR2	SMAD8	Uniprot;PMID:25136781	LGarciaAlonso	https://www.jbc.org/content/273/40/25628/F9.medium.gif	IIB3b_RL_signal_dependent_cytoplasmic
ACVR_1A2A_receptor	SMAD1	Uniprot;PMID:25136781	LGarciaAlonso	https://www.jbc.org/content/273/40/25628/F9.medium.gif	IIB3b_RL_signal_dependent_cytoplasmic
ACVR_1A2A_receptor	SMAD5	Uniprot;PMID:25136781	LGarciaAlonso	https://www.jbc.org/content/273/40/25628/F9.medium.gif	IIB3b_RL_signal_dependent_cytoplasmic
ACVR_1A2A_receptor	SMAD8	Uniprot;PMID:25136781	LGarciaAlonso	https://www.jbc.org/content/273/40/25628/F9.medium.gif	IIB3b_RL_signal_dependent_cytoplasmic
ACVR_1A2B_receptor	SMAD1	Uniprot;PMID:25136781	LGarciaAlonso	https://www.jbc.org/content/273/40/25628/F9.medium.gif	IIB3b_RL_signal_dependent_cytoplasmic
ACVR_1A2B_receptor	SMAD5	Uniprot;PMID:25136781	LGarciaAlonso	https://www.jbc.org/content/273/40/25628/F9.medium.gif	IIB3b_RL_signal_dependent_cytoplasmic
ACVR_1A2B_receptor	SMAD8	Uniprot;PMID:25136781	LGarciaAlonso	https://www.jbc.org/content/273/40/25628/F9.medium.gif	IIB3b_RL_signal_dependent_cytoplasmic
ACVR_1B2B_receptor	SMAD2	Uniprot;PMID:25136781	LGarciaAlonso	https://www.jbc.org/content/273/40/25628/F9.medium.gif	IIB3b_RL_signal_dependent_cytoplasmic
ACVR_1B2B_receptor	SMAD3	Uniprot;PMID:25136781	LGarciaAlonso	https://www.jbc.org/content/273/40/25628/F9.medium.gif	IIB3b_RL_signal_dependent_cytoplasmic
ACVR1_BMPR2	SMAD1	Uniprot;PMID:25136781	LGarciaAlonso	https://www.jbc.org/content/273/40/25628/F9.medium.gif	IIB3b_RL_signal_dependent_cytoplasmic
ACVR1_BMPR2	SMAD5	Uniprot;PMID:25136781	LGarciaAlonso	https://www.jbc.org/content/273/40/25628/F9.medium.gif	IIB3b_RL_signal_dependent_cytoplasmic
ACVR1_BMPR2	SMAD8	Uniprot;PMID:25136781	LGarciaAlonso	https://www.jbc.org/content/273/40/25628/F9.medium.gif	IIB3b_RL_signal_dependent_cytoplasmic
AGTR1	PAX2	PMID:15569307	LGarciaAlonso		IIB3b_RL_signal_dependent_cytoplasmic
AGTR2	STAT3	PMID:24058780	LGarciaAlonso		IIB3b_RL_signal_dependent_cytoplasmic
AGTR2	STAT5A	PMID:24058780	LGarciaAlonso		IIB3b_RL_signal_dependent_cytoplasmic
AGTR2	STAT5B	PMID:24058780	LGarciaAlonso		IIB3b_RL_signal_dependent_cytoplasmic
AGTR2	STAT6	PMID:24058780	LGarciaAlonso		IIB3b_RL_signal_dependent_cytoplasmic
AGTR2	STAT2	PMID:24058780	LGarciaAlonso		IIB3b_RL_signal_dependent_cytoplasmic
AR	AR	selfAssos	LGarciaAlonso		IIB1_steroid_receptor
BMPR1A_BMPR2	SMAD1	Uniprot;PMID:25136781	LGarciaAlonso		IIB3b_RL_signal_dependent_cytoplasmic
BMPR1A_BMPR2	SMAD5	Uniprot;PMID:25136781	LGarciaAlonso		IIB3b_RL_signal_dependent_cytoplasmic
BMPR1A_BMPR2	SMAD8	Uniprot;PMID:25136781	LGarciaAlonso		IIB3b_RL_signal_dependent_cytoplasmic
BMPR1B_BMPR2	SMAD1	Uniprot;PMID:25136781	LGarciaAlonso		IIB3b_RL_signal_dependent_cytoplasmic
BMPR1B_BMPR2	SMAD5	Uniprot;PMID:25136781	LGarciaAlonso		IIB3b_RL_signal_dependent_cytoplasmic
BMPR1B_BMPR2	SMAD8	Uniprot;PMID:25136781	LGarciaAlonso		IIB3b_RL_signal_dependent_cytoplasmic
BMPR1B_BMPR2_ACVR1B	SMAD1	Uniprot;PMID:25136781	LGarciaAlonso		IIB3b_RL_signal_dependent_cytoplasmic
BMPR1B_BMPR2_ACVR1B	SMAD5	Uniprot;PMID:25136781	LGarciaAlonso		IIB3b_RL_signal_dependent_cytoplasmic
BMPR1B_BMPR2_ACVR1B	SMAD8	Uniprot;PMID:25136781	LGarciaAlonso		IIB3b_RL_signal_dependent_cytoplasmic
BMR1A_ACR2A	SMAD1	Uniprot;PMID:25136781	LGarciaAlonso	https://www.jbc.org/content/273/40/25628/F9.medium.gif	IIB3b_RL_signal_dependent_cytoplasmic
BMR1A_ACR2A	SMAD5	Uniprot;PMID:25136781	LGarciaAlonso	https://www.jbc.org/content/273/40/25628/F9.medium.gif	IIB3b_RL_signal_dependent_cytoplasmic
BMR1A_ACR2A	SMAD8	Uniprot;PMID:25136781	LGarciaAlonso	https://www.jbc.org/content/273/40/25628/F9.medium.gif	IIB3b_RL_signal_dependent_cytoplasmic
BMR1A_AVR2B	SMAD1	Uniprot;PMID:25136781	LGarciaAlonso	https://www.jbc.org/content/273/40/25628/F9.medium.gif	IIB3b_RL_signal_dependent_cytoplasmic
BMR1A_AVR2B	SMAD5	Uniprot;PMID:25136781	LGarciaAlonso	https://www.jbc.org/content/273/40/25628/F9.medium.gif	IIB3b_RL_signal_dependent_cytoplasmic
BMR1A_AVR2B	SMAD8	Uniprot;PMID:25136781	LGarciaAlonso	https://www.jbc.org/content/273/40/25628/F9.medium.gif	IIB3b_RL_signal_dependent_cytoplasmic
BMR1B_AVR2A	SMAD1	Uniprot;PMID:25136781	LGarciaAlonso	https://www.jbc.org/content/273/40/25628/F9.medium.gif	IIB3b_RL_signal_dependent_cytoplasmic
BMR1B_AVR2A	SMAD5	Uniprot;PMID:25136781	LGarciaAlonso	https://www.jbc.org/content/273/40/25628/F9.medium.gif	IIB3b_RL_signal_dependent_cytoplasmic
BMR1B_AVR2A	SMAD8	Uniprot;PMID:25136781	LGarciaAlonso	https://www.jbc.org/content/273/40/25628/F9.medium.gif	IIB3b_RL_signal_dependent_cytoplasmic
BMR1B_AVR2B	SMAD1	Uniprot;PMID:25136781	LGarciaAlonso	https://www.jbc.org/content/273/40/25628/F9.medium.gif	IIB3b_RL_signal_dependent_cytoplasmic
BMR1B_AVR2B	SMAD5	Uniprot;PMID:25136781	LGarciaAlonso	https://www.jbc.org/content/273/40/25628/F9.medium.gif	IIB3b_RL_signal_dependent_cytoplasmic
BMR1B_AVR2B	SMAD8	Uniprot;PMID:25136781	LGarciaAlonso	https://www.jbc.org/content/273/40/25628/F9.medium.gif	IIB3b_RL_signal_dependent_cytoplasmic
CXCR4	STAT1	PMID:10506573	LGarciaAlonso		IIB3b_RL_signal_dependent_cytoplasmic
CXCR4	STAT3	PMID:10506573	LGarciaAlonso		IIB3b_RL_signal_dependent_cytoplasmic
CXCR4	STAT4	PMID:10506573	LGarciaAlonso		IIB3b_RL_signal_dependent_cytoplasmic
CXCR4	STAT5A	PMID:10506573	LGarciaAlonso		IIB3b_RL_signal_dependent_cytoplasmic
CXCR4	STAT5B	PMID:10506573	LGarciaAlonso		IIB3b_RL_signal_dependent_cytoplasmic
CXCR4	STAT6	PMID:10506573	LGarciaAlonso		IIB3b_RL_signal_dependent_cytoplasmic
EGFR	STAT1	Uniprot;PBMID: 8524316	LGarciaAlonso;RuxTes		IIB3b_RL_signal_dependent_cytoplasmic
EGFR	STAT3	Uniprot;PBMID: 8524316	LGarciaAlonso;RuxTes		IIB3b_RL_signal_dependent_cytoplasmic
EGFR	STAT5A	Uniprot;PBMID: 8524316	LGarciaAlonso;RuxTes		IIB3b_RL_signal_dependent_cytoplasmic
EGFR	STAT5B	Uniprot	LGarciaAlonso		IIB3b_RL_signal_dependent_cytoplasmic
EPOR	STAT1	Uniprot	LGarciaAlonso		IIB3b_RL_signal_dependent_cytoplasmic
EPOR	STAT3	Uniprot	LGarciaAlonso		IIB3b_RL_signal_dependent_cytoplasmic
EPOR	STAT5A	Uniprot;PMID: 8665851	LGarciaAlonso;RuxTes		IIB3b_RL_signal_dependent_cytoplasmic
EPOR	STAT5B	Uniprot	LGarciaAlonso		IIB3b_RL_signal_dependent_cytoplasmic
ERBB4	STAT5A	PMID: 15863494	RuxTes
ESR1	ESR1	selfAssos	LGarciaAlonso		IIB1_steroid_receptor
ESR2	ESR2	selfAssos	LGarciaAlonso		IIB1_steroid_receptor
FGFR2	ESR1	PMID: 29180470; PMID: 27236187	RuxTes
FSHR	FOXO1	PMID:11875118	LGarciaAlonso		IIA_developmental
FSHR	FOXO3	PMID:11875118	LGarciaAlonso		IIA_developmental
FZD7_LRP5	TBXT	PMID:27641648;https://doi.org/10.1016/C2015-0-05642-8	LGarciaAlonso		IIA_developmental
FZD7_LRP6	TBXT	PMID:27641648;https://doi.org/10.1016/C2015-0-05642-8	LGarciaAlonso		IIA_developmental
HNF4A	HNF4A	selfAssos	LGarciaAlonso		IIB1_steroid_receptor
HNF4G	HNF4G	selfAssos	LGarciaAlonso		IIB1_steroid_receptor
IL1_receptor	NFKB1	PMID:8413223	LGarciaAlonso		IIB3b_RL_signal_dependent_cytoplasmic
IL10_receptor	STAT1	Uniprot	LGarciaAlonso		IIB3b_RL_signal_dependent_cytoplasmic
IL10_receptor	STAT3	Uniprot	LGarciaAlonso		IIB3b_RL_signal_dependent_cytoplasmic
IL10_receptor	STAT5A	Uniprot	LGarciaAlonso		IIB3b_RL_signal_dependent_cytoplasmic
IL10_receptor	STAT5B	Uniprot	LGarciaAlonso		IIB3b_RL_signal_dependent_cytoplasmic
IL12_receptor	STAT1	Uniprot	LGarciaAlonso		IIB3b_RL_signal_dependent_cytoplasmic
IL12_receptor	STAT3	Uniprot	LGarciaAlonso		IIB3b_RL_signal_dependent_cytoplasmic
IL12_receptor	STAT4	Uniprot	LGarciaAlonso		IIB3b_RL_signal_dependent_cytoplasmic
IL12_receptor	STAT5A	Uniprot	LGarciaAlonso		IIB3b_RL_signal_dependent_cytoplasmic
IL12_receptor	STAT5B	Uniprot	LGarciaAlonso		IIB3b_RL_signal_dependent_cytoplasmic
IL12_receptor	STAT6	Uniprot	LGarciaAlonso		IIB3b_RL_signal_dependent_cytoplasmic
IL2_receptor_I	STAT1	Uniprot	LGarciaAlonso		IIB3b_RL_signal_dependent_cytoplasmic
IL2_receptor_I	STAT3	Uniprot	LGarciaAlonso		IIB3b_RL_signal_dependent_cytoplasmic
IL2_receptor_I	STAT4	Uniprot	LGarciaAlonso		IIB3b_RL_signal_dependent_cytoplasmic
IL2_receptor_I	STAT5A	Uniprot;PMID: 9597132	LGarciaAlonso;RuxTes		IIB3b_RL_signal_dependent_cytoplasmic
IL2_receptor_I	STAT5B	Uniprot	LGarciaAlonso		IIB3b_RL_signal_dependent_cytoplasmic
IL2_receptor_I	STAT6	Uniprot	LGarciaAlonso		IIB3b_RL_signal_dependent_cytoplasmic
IL3_receptor	STAT1	Uniprot	LGarciaAlonso		IIB3b_RL_signal_dependent_cytoplasmic
IL3_receptor	STAT3	Uniprot	LGarciaAlonso		IIB3b_RL_signal_dependent_cytoplasmic
IL3_receptor	STAT5A	Uniprot	LGarciaAlonso		IIB3b_RL_signal_dependent_cytoplasmic
IL3_receptor	STAT5B	Uniprot	LGarciaAlonso		IIB3b_RL_signal_dependent_cytoplasmic
IL3_receptor	STAT6	Uniprot	LGarciaAlonso		IIB3b_RL_signal_dependent_cytoplasmic
IL4R	STAT5A	PMID:9813029	RuxTes		IIB3b_RL_signal_dependent_cytoplasmic
IL4R	STAT6	PMID: 8602263; PMID: 25145352	RuxTes		IIB3b_RL_signal_dependent_cytoplasmic
IL5RA	SOX4	PMID: 11498591; DOI: 10.1126/science.1059157	RuxTes		IIB3b_RL_signal_dependent_cytoplasmic
IL6_receptor	STAT1	Uniprot	LGarciaAlonso		IIB3b_RL_signal_dependent_cytoplasmic
IL6_receptor	STAT3	Uniprot	LGarciaAlonso		IIB3b_RL_signal_dependent_cytoplasmic
IL7R	STAT5A	PMID: 9597132	RuxTes		IIB3b_RL_signal_dependent_cytoplasmic
INSR	FOXO1	Uniprot	LGarciaAlonso		IIA_developmental
KIT	STAT1	Uniprot;PMID:10358045;PMID: 9355737	LGarciaAlonso;RuxTes		IIB3b_RL_signal_dependent_cytoplasmic
KIT	STAT3	Uniprot	LGarciaAlonso		IIB3b_RL_signal_dependent_cytoplasmic
KIT	STAT5A	Uniprot;PMID:10358045	LGarciaAlonso		IIB3b_RL_signal_dependent_cytoplasmic
KIT	STAT5B	Uniprot;PMID:10358045	LGarciaAlonso		IIB3b_RL_signal_dependent_cytoplasmic
LHCGR	FOXO1	PMID:11875118	LGarciaAlonso		IIA_developmental
LHCGR	FOXO3	PMID:11875118	LGarciaAlonso		IIA_developmental
MERTK	STAT1	Uniprot	LGarciaAlonso		IIB3b_RL_signal_dependent_cytoplasmic
NOTCH1	EOMES	PMID:19265115	LGarciaAlonso		IIB3b_RL_signal_dependent_cytoplasmic
NOTCH1	HES1	Uniprot;NetPath;PMID 10520600	LGarciaAlonso;RuxTes		IIB3b_RL_signal_dependent_cytoplasmic
NOTCH2	HES1	Uniprot;NetPath;PMID 10520600	LGarciaAlonso;RuxTes		IIB3b_RL_signal_dependent_cytoplasmic
NOTCH1	HES5	Uniprot;NetPath;PMID 10520600	LGarciaAlonso;RuxTes		IIB3b_RL_signal_dependent_cytoplasmic
NOTCH1	HEY1	Uniprot;NetPath	LGarciaAlonso		IIB3b_RL_signal_dependent_cytoplasmic
NOTCH1	HEY2	Uniprot;NetPath	LGarciaAlonso		IIB3b_RL_signal_dependent_cytoplasmic
NOTCH1	RBPJ	Uniprot;signalink;PMID:10637481;PMID:8749394;NetPath;PMID: 22718343; PMID: 12039915; PMID: 16921404	LGarciaAlonso;RuxTes		IIB3b_RL_signal_dependent_cytoplasmic
NOTCH2	RBPJ	PMID: 22718343; PMID: 12039915; PMID: 16921404	RuxTes		IIB3b_RL_signal_dependent_cytoplasmic
NOTCH3	RBPJ	PMID: 22718343; PMID: 12039915; PMID: 16921405	RuxTes		IIB3b_RL_signal_dependent_cytoplasmic
NOTCH4	RBPJ	PMID: 22718343; PMID: 12039915; PMID: 16921406	RuxTes		IIB3b_RL_signal_dependent_cytoplasmic
NOTCH2	ID4	PMID:31390563	LGarciaAlonso		IIB3b_RL_signal_dependent_cytoplasmic
NOTCH3	HES4	PMID:27791012	LGarciaAlonso		IIB3b_RL_signal_dependent_cytoplasmic
NOTCH4	HEYL	PMID:27791013	LGarciaAlonso		IIB3b_RL_signal_dependent_cytoplasmic
NOTCH5	HEY1	PMID:27791014	LGarciaAlonso		IIB3b_RL_signal_dependent_cytoplasmic
NOTCH6	HEY2	PMID:27791015	LGarciaAlonso		IIB3b_RL_signal_dependent_cytoplasmic
NR0B1	NR0B1	selfAssos	LGarciaAlonso		IIB1_steroid_receptor
NR0B2	NR0B2	selfAssos	LGarciaAlonso		IIB1_steroid_receptor
NR1D1	NR1D1	selfAssos	LGarciaAlonso		IIB1_steroid_receptor
NR1D2	NR1D2	selfAssos	LGarciaAlonso		IIB1_steroid_receptor
NR1H2	NR1H2	selfAssos	LGarciaAlonso		IIB1_steroid_receptor
NR1H3	NR1H3	selfAssos	LGarciaAlonso		IIB1_steroid_receptor
NR1H4	NR1H4	selfAssos	LGarciaAlonso		IIB1_steroid_receptor
NR1I2	NR1I2	selfAssos	LGarciaAlonso		IIB1_steroid_receptor
NR1I3	NR1I3	selfAssos	LGarciaAlonso		IIB1_steroid_receptor
NR2C1	NR2C1	selfAssos	LGarciaAlonso		IIB1_steroid_receptor
NR2C2	NR2C2	selfAssos	LGarciaAlonso		IIB1_steroid_receptor
NR2E1	NR2E1	selfAssos	LGarciaAlonso		IIB1_steroid_receptor
NR2E3	NR2E3	selfAssos	LGarciaAlonso		IIB1_steroid_receptor
NR2F1	NR2F1	selfAssos	LGarciaAlonso		IIB1_steroid_receptor
NR2F2	NR2F2	selfAssos	LGarciaAlonso		IIB1_steroid_receptor
NR2F6	NR2F6	selfAssos	LGarciaAlonso		IIB1_steroid_receptor
NR3C1	NR3C1	selfAssos	LGarciaAlonso		IIB1_steroid_receptor
NR3C2	NR3C2	selfAssos	LGarciaAlonso		IIB1_steroid_receptor
NR4A1	NR4A1	selfAssos	LGarciaAlonso		IIB1_steroid_receptor
NR4A2	NR4A2	selfAssos	LGarciaAlonso		IIB1_steroid_receptor
NR4A3	NR4A3	selfAssos	LGarciaAlonso		IIB1_steroid_receptor
NR5A1	NR5A1	selfAssos	LGarciaAlonso		IIB1_steroid_receptor
NR5A2	NR5A2	selfAssos	LGarciaAlonso		IIB1_steroid_receptor
NR6A1	NR6A1	selfAssos	LGarciaAlonso		IIB1_steroid_receptor
PDGFRA	STAT1	PMID: 9788278	RuxTes		IIB3b_RL_signal_dependent_cytoplasmic
PDGFRA	STAT3	PMID: 9788278	RuxTes		IIB3b_RL_signal_dependent_cytoplasmic
PDGFRA	STAT5A	PMID: 9484840	RuxTes		IIB3b_RL_signal_dependent_cytoplasmic
PDGFRA	STAT5B	PMID: 9484840	RuxTes		IIB3b_RL_signal_dependent_cytoplasmic
PDGFRB	STAT1	PMID: 10207096; PMID: 9484840	RuxTes		IIB3b_RL_signal_dependent_cytoplasmic
PDGFRB	STAT3	PMID: 10207096; PMID: 9484840	RuxTes		IIB3b_RL_signal_dependent_cytoplasmic
PDGFRB	STAT5A	PMID: 9813029	RuxTes		IIB3b_RL_signal_dependent_cytoplasmic
PDGFRB	STAT5B	PMID: 9813029	RuxTes		IIB3b_RL_signal_dependent_cytoplasmic
PGR	PGR	selfAssos	LGarciaAlonso		IIB1_steroid_receptor
PPARA	PPARA	selfAssos	LGarciaAlonso		IIB1_steroid_receptor
PPARD	PPARD	selfAssos	LGarciaAlonso		IIB1_steroid_receptor
PPARG	PPARG	selfAssos	LGarciaAlonso		IIB1_steroid_receptor
PTCH_BOC_transmembrane_receptor	GLI1	reactome;Uniprot;NetPath	LGarciaAlonso		IIB3b_RL_signal_dependent_cytoplasmic
PTCH_BOC_transmembrane_receptor	GLI2	reactome;Uniprot;NetPath	LGarciaAlonso		IIB3b_RL_signal_dependent_cytoplasmic
PTCH_BOC_transmembrane_receptor	GLI3	reactome;Uniprot;NetPath	LGarciaAlonso		IIB3b_RL_signal_dependent_cytoplasmic
PTCH_CDON_transmembrane_receptor	GLI1	reactome;Uniprot;NetPath	LGarciaAlonso		IIB3b_RL_signal_dependent_cytoplasmic
PTCH_CDON_transmembrane_receptor	GLI2	reactome;Uniprot;NetPath	LGarciaAlonso		IIB3b_RL_signal_dependent_cytoplasmic
PTCH_CDON_transmembrane_receptor	GLI3	reactome;Uniprot;NetPath	LGarciaAlonso		IIB3b_RL_signal_dependent_cytoplasmic
PTCH_GAS1_transmembrane_receptor	GLI1	reactome;Uniprot;NetPath	LGarciaAlonso		IIB3b_RL_signal_dependent_cytoplasmic
PTCH_GAS1_transmembrane_receptor	GLI2	reactome;Uniprot;NetPath	LGarciaAlonso		IIB3b_RL_signal_dependent_cytoplasmic
PTCH_GAS1_transmembrane_receptor	GLI3	reactome;Uniprot;NetPath	LGarciaAlonso		IIB3b_RL_signal_dependent_cytoplasmic
RORA	RORA	selfAssos	LGarciaAlonso		IIB1_steroid_receptor
RORB	RORB	selfAssos	LGarciaAlonso		IIB1_steroid_receptor
RORC	RORC	selfAssos	LGarciaAlonso		IIB1_steroid_receptor
TGFbeta_receptor1	SMAD2	Uniprot;PMID:25136781	LGarciaAlonso		IIB3b_RL_signal_dependent_cytoplasmic
TGFbeta_receptor1	SMAD3	Uniprot;PMID:25136781	LGarciaAlonso		IIB3b_RL_signal_dependent_cytoplasmic
TGFbeta_receptor2	SMAD2	Uniprot;PMID:25136781	LGarciaAlonso		IIB3b_RL_signal_dependent_cytoplasmic
TGFbeta_receptor2	SMAD3	Uniprot;PMID:25136781	LGarciaAlonso		IIB3b_RL_signal_dependent_cytoplasmic
THRA	THRA	selfAssos	LGarciaAlonso		IIB1_steroid_receptor
THRB	THRB	selfAssos	LGarciaAlonso		IIB1_steroid_receptor
TLR7	IRF5	PMID:15695821	LGarciaAlonso		IIB3b_RL_signal_dependent_cytoplasmic
TLR8	IRF5	PMID:15695821	LGarciaAlonso		IIB3b_RL_signal_dependent_cytoplasmic
TNFRSF1A	NFKB1	PMID:20457564	LGarciaAlonso		IIB3b_RL_signal_dependent_cytoplasmic
TNFRSF1B	NFKB1	PMID:20457564	LGarciaAlonso		IIB3b_RL_signal_dependent_cytoplasmic
Type_I_IFNR	STAT1	Uniprot	LGarciaAlonso		IIB3b_RL_signal_dependent_cytoplasmic
Type_I_IFNR	STAT2	Uniprot	LGarciaAlonso		IIB3b_RL_signal_dependent_cytoplasmic
Type_II_IFNR	STAT1	Uniprot	LGarciaAlonso		IIB3b_RL_signal_dependent_cytoplasmic
Type_II_IFNR	STAT2	Uniprot	LGarciaAlonso		IIB3b_RL_signal_dependent_cytoplasmic
Type_III_IFNR	STAT1	Uniprot	LGarciaAlonso		IIB3b_RL_signal_dependent_cytoplasmic
Type_III_IFNR	STAT2	Uniprot	LGarciaAlonso		IIB3b_RL_signal_dependent_cytoplasmic
VDR	VDR	selfAssos	LGarciaAlonso		IIB1_steroid_receptor
RAreceptor_RARA_RXRA	MEIOSIN	publication	LGarciaAlonso		IIB3b_RL_signal_dependent_cytoplasmic	STRA8
RAreceptor_RARB_RXRB	MEIOSIN	publication	LGarciaAlonso		IIB3b_RL_signal_dependent_cytoplasmic	STRA9
RAreceptor_RARG_RXRG	MEIOSIN	publication	LGarciaAlonso		IIB3b_RL_signal_dependent_cytoplasmic	STRA10
RAreceptor_RXRA	RXRA	selfAssos	LGarciaAlonso		IIB1_steroid_receptor
RAreceptor_RXRB	RXRB	selfAssos	LGarciaAlonso		IIB1_steroid_receptor
RAreceptor_RXRG	RXRG	selfAssos	LGarciaAlonso		IIB1_steroid_receptor
RAreceptor_RARA	RARA	selfAssos	LGarciaAlonso		IIB1_steroid_receptor
RAreceptor_RARB	RARB	selfAssos	LGarciaAlonso		IIB1_steroid_receptor
RAreceptor_RARG	RARG	selfAssos	LGarciaAlonso		IIB1_steroid_receptor
RAreceptor_RARA_RXRA	RARA	selfAssos	LGarciaAlonso		IIB1_steroid_receptor
RAreceptor_RARB_RXRB	RARB	selfAssos	LGarciaAlonso		IIB1_steroid_receptor
RAreceptor_RARG:RXRG	RARG	selfAssos	LGarciaAlonso		IIB1_steroid_receptor
RAreceptor_RARA_RXRA	RXRA	selfAssos	LGarciaAlonso		IIB1_steroid_receptor
RAreceptor_RARB_RXRB	RXRB	selfAssos	LGarciaAlonso		IIB1_steroid_receptor
RAreceptor_RARG:RXRG	RXRG	selfAssos	LGarciaAlonso		IIB1_steroid_receptor
EPHB4	ELK1	PMID:32299362	LGarciaAlonso		IIA_developmental
BMPR1A_BMPR2	ZGLP1	PMID:32054698	LGarciaAlonso		IIA_developmental
BMPR1B_BMPR2	ZGLP1	PMID:32054698	LGarciaAlonso		IIA_developmental
BMR1A_ACR2A	ZGLP1	PMID:32054698	LGarciaAlonso		IIA_developmental
BMR1A_AVR2B	ZGLP1	PMID:32054698	LGarciaAlonso		IIA_developmental
BMR1B_AVR2A	ZGLP1	PMID:32054698	LGarciaAlonso		IIA_developmental
BMR1B_AVR2B	ZGLP1	PMID:32054698	LGarciaAlonso		IIA_developmental
