# Supplementary material for: Single-cell roadmap of human gonadal development
Source: Research Square preprint supplement (doi:10.21203/rs.3.rs-496470/v1), 2021-05-21
Supplement: Supplementary file 20 [file f3d89bbf423811db80143951.xlsx]

## Sheet: 1_cicero_females
	Peak	CCAN	peaks_formatted	peak_width	exon	gene_id	gene	gene_name	annotation	promoter	tss_distance	ENCODE_blacklist	Germ cells	coelEpi	ovarian surface	preGC-I	preGC-II	granulosa	sPAX8	ovarianStroma	dorsalMesentery	PV	M_MGP	M_MullDuct_LGR5	M_prog_ISL1	Immune	Endothelial	Epithelial	Neural
0	chr1-10020176-10021045	764	chr1-10020176-10021045	870	0		0		intergenic	0	11786	0	-0.218498	2.44586	-0.384448	-0.926679	-0.892536	-0.999	-0.692565	-0.473645	1.00851	-0.603883	1.68068	0.986473	1.03614	-0.482478	-0.622116	-0.0988203	-0.762991
1	chr1-10196508-10197517	764	chr1-10196508-10197517	1010	0		0		intergenic	0	13287	0	-0.218498	2.44586	-0.384448	-0.926679	-0.892536	-0.999	-0.692565	-0.473645	1.00851	-0.603883	1.68068	0.986473	1.03614	-0.482478	-0.622116	-0.0988203	-0.762991
2	chr1-10423783-10424572	764	chr1-10423783-10424572	790	0		0		intergenic	0	4970	0	-0.218498	2.44586	-0.384448	-0.926679	-0.892536	-0.999	-0.692565	-0.473645	1.00851	-0.603883	1.68068	0.986473	1.03614	-0.482478	-0.622116	-0.0988203	-0.762991
3	chr1-10450233-10451668	764	chr1-10450233-10451668	1436	1	ENSG00000241563	1	CORT	exon	0	513	0	-0.218498	2.44586	-0.384448	-0.926679	-0.892536	-0.999	-0.692565	-0.473645	1.00851	-0.603883	1.68068	0.986473	1.03614	-0.482478	-0.622116	-0.0988203	-0.762991
4	chr1-9659202-9659917	764	chr1-9659202-9659917	716	0	ENSG00000171608	1	PIK3CD	intron	0	7456	0	-0.218498	2.44586	-0.384448	-0.926679	-0.892536	-0.999	-0.692565	-0.473645	1.00851	-0.603883	1.68068	0.986473	1.03614	-0.482478	-0.622116	-0.0988203	-0.762991
5	chr1-9798050-9799008	764	chr1-9798050-9799008	959	0	ENSG00000171603	1	CLSTN1	intron	0	24975	0	-0.218498	2.44586	-0.384448	-0.926679	-0.892536	-0.999	-0.692565	-0.473645	1.00851	-0.603883	1.68068	0.986473	1.03614	-0.482478	-0.622116	-0.0988203	-0.762991
6	chr1-9825106-9825900	764	chr1-9825106-9825900	795	0	ENSG00000171603	0	CLSTN1	promoter	1	579	0	-0.218498	2.44586	-0.384448	-0.926679	-0.892536	-0.999	-0.692565	-0.473645	1.00851	-0.603883	1.68068	0.986473	1.03614	-0.482478	-0.622116	-0.0988203	-0.762991
7	chr1-9884006-9884941	764	chr1-9884006-9884941	936	0	ENSG00000178585	1	CTNNBIP1	intron	0	5829	0	-0.218498	2.44586	-0.384448	-0.926679	-0.892536	-0.999	-0.692565	-0.473645	1.00851	-0.603883	1.68068	0.986473	1.03614	-0.482478	-0.622116	-0.0988203	-0.762991
8	chr1-100354898-100355232	1	chr1-100354898-100355232	335	0	ENSG00000079335	1	CDC14A	intron	0	2297	0	-0.836216	0.505785	2.08528	0.466317	1.43653	2.28423	-0.254178	-0.141757	-0.558983	-0.844962	-0.689975	-0.226237	-0.752822	-0.849171	-0.856257	-0.0346534	-0.732926
9	chr1-100357386-100358485	1	chr1-100357386-100358485	1100	0	ENSG00000079335	1	CDC14A	intron	0	4785	0	-0.836216	0.505785	2.08528	0.466317	1.43653	2.28423	-0.254178	-0.141757	-0.558983	-0.844962	-0.689975	-0.226237	-0.752822	-0.849171	-0.856257	-0.0346534	-0.732926
10	chr1-100360562-100361182	1	chr1-100360562-100361182	621	0	ENSG00000079335	1	CDC14A	intron	0	7961	0	-0.836216	0.505785	2.08528	0.466317	1.43653	2.28423	-0.254178	-0.141757	-0.558983	-0.844962	-0.689975	-0.226237	-0.752822	-0.849171	-0.856257	-0.0346534	-0.732926
11	chr1-100364418-100365076	1	chr1-100364418-100365076	659	0	ENSG00000079335	1	CDC14A	intron	0	11817	0	-0.836216	0.505785	2.08528	0.466317	1.43653	2.28423	-0.254178	-0.141757	-0.558983	-0.844962	-0.689975	-0.226237	-0.752822	-0.849171	-0.856257	-0.0346534	-0.732926
12	chr1-100469186-100469953	1	chr1-100469186-100469953	768	0	ENSG00000079335	1	CDC14A	intron	0	45453	0	-0.836216	0.505785	2.08528	0.466317	1.43653	2.28423	-0.254178	-0.141757	-0.558983	-0.844962	-0.689975	-0.226237	-0.752822	-0.849171	-0.856257	-0.0346534	-0.732926
13	chr1-100443574-100444704	3	chr1-100443574-100444704	1131	0	ENSG00000079335	1	CDC14A	intron	0	19841	0	-0.675661	1.413	-0.768106	-0.900518	-0.976984	-1.09221	-0.497461	-0.484179	1.30372	0.293792	2.59302	0.572294	0.625115	-0.845103	0.13883	0.0442451	-0.743784
14	chr1-100642840-100644338	3	chr1-100642840-100644338	1499	0		0		intergenic	0	75403	0	-0.675661	1.413	-0.768106	-0.900518	-0.976984	-1.09221	-0.497461	-0.484179	1.30372	0.293792	2.59302	0.572294	0.625115	-0.845103	0.13883	0.0442451	-0.743784
15	chr1-100719262-100720447	3	chr1-100719262-100720447	1186	1	ENSG00000162692	1	VCAM1	exon	1	0	0	-0.675661	1.413	-0.768106	-0.900518	-0.976984	-1.09221	-0.497461	-0.484179	1.30372	0.293792	2.59302	0.572294	0.625115	-0.845103	0.13883	0.0442451	-0.743784
16	chr1-100721265-100722173	3	chr1-100721265-100722173	909	0	ENSG00000162692	1	VCAM1	intron	0	1500	0	-0.675661	1.413	-0.768106	-0.900518	-0.976984	-1.09221	-0.497461	-0.484179	1.30372	0.293792	2.59302	0.572294	0.625115	-0.845103	0.13883	0.0442451	-0.743784
17	chr1-100734222-100735113	3	chr1-100734222-100735113	892	1	ENSG00000162692	1	VCAM1	exon	1	61	0	-0.675661	1.413	-0.768106	-0.900518	-0.976984	-1.09221	-0.497461	-0.484179	1.30372	0.293792	2.59302	0.572294	0.625115	-0.845103	0.13883	0.0442451	-0.743784
18	chr1-1004483-1005709	752	chr1-1004483-1005709	1227	0	ENSG00000187608	1	ISG15	intron	0	3337	0	1.36724	1.08355	-0.516199	-0.0241727	-1.14969	-0.952257	0.56451	-0.559264	0.0982991	0.717246	1.41819	1.20696	0.138975	-0.144756	-2.558	-0.257967	-0.432673
19	chr1-1017819-1018231	752	chr1-1017819-1018231	413	0	ENSG00000188157	0	AGRN	promoter	1	1891	0	1.36724	1.08355	-0.516199	-0.0241727	-1.14969	-0.952257	0.56451	-0.559264	0.0982991	0.717246	1.41819	1.20696	0.138975	-0.144756	-2.558	-0.257967	-0.432673
20	chr1-1023724-1023957	752	chr1-1023724-1023957	234	0	ENSG00000188157	1	AGRN	intron	0	3600	0	1.36724	1.08355	-0.516199	-0.0241727	-1.14969	-0.952257	0.56451	-0.559264	0.0982991	0.717246	1.41819	1.20696	0.138975	-0.144756	-2.558	-0.257967	-0.432673
21	chr1-1024581-1025558	752	chr1-1024581-1025558	978	0	ENSG00000188157	1	AGRN	intron	0	4457	0	1.36724	1.08355	-0.516199	-0.0241727	-1.14969	-0.952257	0.56451	-0.559264	0.0982991	0.717246	1.41819	1.20696	0.138975	-0.144756	-2.558	-0.257967	-0.432673
22	chr1-1026688-1027471	752	chr1-1026688-1027471	784	0	ENSG00000188157	1	AGRN	intron	0	6564	0	1.36724	1.08355	-0.516199	-0.0241727	-1.14969	-0.952257	0.56451	-0.559264	0.0982991	0.717246	1.41819	1.20696	0.138975	-0.144756	-2.558	-0.257967	-0.432673
23	chr1-1058684-1059991	752	chr1-1058684-1059991	1308	0		0		intergenic	0	6697	0	1.36724	1.08355	-0.516199	-0.0241727	-1.14969	-0.952257	0.56451	-0.559264	0.0982991	0.717246	1.41819	1.20696	0.138975	-0.144756	-2.558	-0.257967	-0.432673
24	chr1-1073698-1074496	752	chr1-1073698-1074496	799	1	ENSG00000237330	1	RNF223	exon	1	0	0	1.36724	1.08355	-0.516199	-0.0241727	-1.14969	-0.952257	0.56451	-0.559264	0.0982991	0.717246	1.41819	1.20696	0.138975	-0.144756	-2.558	-0.257967	-0.432673
25	chr1-1122831-1124205	752	chr1-1122831-1124205	1375	0		0		intergenic	0	6469	0	1.36724	1.08355	-0.516199	-0.0241727	-1.14969	-0.952257	0.56451	-0.559264	0.0982991	0.717246	1.41819	1.20696	0.138975	-0.144756	-2.558	-0.257967	-0.432673
26	chr1-1124255-1124593	752	chr1-1124255-1124593	339	0		0		intergenic	0	7893	0	1.36724	1.08355	-0.516199	-0.0241727	-1.14969	-0.952257	0.56451	-0.559264	0.0982991	0.717246	1.41819	1.20696	0.138975	-0.144756	-2.558	-0.257967	-0.432673
27	chr1-1124788-1125111	752	chr1-1124788-1125111	324	0		0		intergenic	0	8426	0	1.36724	1.08355	-0.516199	-0.0241727	-1.14969	-0.952257	0.56451	-0.559264	0.0982991	0.717246	1.41819	1.20696	0.138975	-0.144756	-2.558	-0.257967	-0.432673
28	chr1-1130136-1131050	752	chr1-1130136-1131050	915	0		0		intergenic	0	13774	0	1.36724	1.08355	-0.516199	-0.0241727	-1.14969	-0.952257	0.56451	-0.559264	0.0982991	0.717246	1.41819	1.20696	0.138975	-0.144756	-2.558	-0.257967	-0.432673
29	chr1-1132575-1132812	752	chr1-1132575-1132812	238	0		0		intergenic	0	16213	0	1.36724	1.08355	-0.516199	-0.0241727	-1.14969	-0.952257	0.56451	-0.559264	0.0982991	0.717246	1.41819	1.20696	0.138975	-0.144756	-2.558	-0.257967	-0.432673
30	chr1-1132989-1133740	752	chr1-1132989-1133740	752	0		0		intergenic	0	16627	0	1.36724	1.08355	-0.516199	-0.0241727	-1.14969	-0.952257	0.56451	-0.559264	0.0982991	0.717246	1.41819	1.20696	0.138975	-0.144756	-2.558	-0.257967	-0.432673
31	chr1-1135320-1135769	752	chr1-1135320-1135769	450	0		0		intergenic	0	18958	0	1.36724	1.08355	-0.516199	-0.0241727	-1.14969	-0.952257	0.56451	-0.559264	0.0982991	0.717246	1.41819	1.20696	0.138975	-0.144756	-2.558	-0.257967	-0.432673
32	chr1-1143073-1143466	752	chr1-1143073-1143466	394	0		0		intergenic	0	26711	0	1.36724	1.08355	-0.516199	-0.0241727	-1.14969	-0.952257	0.56451	-0.559264	0.0982991	0.717246	1.41819	1.20696	0.138975	-0.144756	-2.558	-0.257967	-0.432673
33	chr1-1162454-1163700	752	chr1-1162454-1163700	1247	0		0		intergenic	0	10183	0	1.36724	1.08355	-0.516199	-0.0241727	-1.14969	-0.952257	0.56451	-0.559264	0.0982991	0.717246	1.41819	1.20696	0.138975	-0.144756	-2.558	-0.257967	-0.432673
34	chr1-1164546-1165079	752	chr1-1164546-1165079	534	0		0		intergenic	0	8804	0	1.36724	1.08355	-0.516199	-0.0241727	-1.14969	-0.952257	0.56451	-0.559264	0.0982991	0.717246	1.41819	1.20696	0.138975	-0.144756	-2.558	-0.257967	-0.432673
35	chr1-1173469-1174308	752	chr1-1173469-1174308	840	1	ENSG00000162571	1	TTLL10	exon	1	0	0	1.36724	1.08355	-0.516199	-0.0241727	-1.14969	-0.952257	0.56451	-0.559264	0.0982991	0.717246	1.41819	1.20696	0.138975	-0.144756	-2.558	-0.257967	-0.432673
36	chr1-1207987-1208732	752	chr1-1207987-1208732	746	0	ENSG00000186891	0	TNFRSF18	promoter	1	1295	0	1.36724	1.08355	-0.516199	-0.0241727	-1.14969	-0.952257	0.56451	-0.559264	0.0982991	0.717246	1.41819	1.20696	0.138975	-0.144756	-2.558	-0.257967	-0.432673
37	chr1-1249605-1250481	752	chr1-1249605-1250481	877	0		0		intergenic	0	2882	0	1.36724	1.08355	-0.516199	-0.0241727	-1.14969	-0.952257	0.56451	-0.559264	0.0982991	0.717246	1.41819	1.20696	0.138975	-0.144756	-2.558	-0.257967	-0.432673
38	chr1-1281226-1282082	752	chr1-1281226-1282082	857	1	ENSG00000162572	1	SCNN1D	exon	1	0	0	1.36724	1.08355	-0.516199	-0.0241727	-1.14969	-0.952257	0.56451	-0.559264	0.0982991	0.717246	1.41819	1.20696	0.138975	-0.144756	-2.558	-0.257967	-0.432673
39	chr1-1282155-1282455	752	chr1-1282155-1282455	301	1	ENSG00000162572	1	SCNN1D	exon	1	0	0	1.36724	1.08355	-0.516199	-0.0241727	-1.14969	-0.952257	0.56451	-0.559264	0.0982991	0.717246	1.41819	1.20696	0.138975	-0.144756	-2.558	-0.257967	-0.432673
40	chr1-1290814-1292198	752	chr1-1290814-1292198	1385	1	ENSG00000162572	1	SCNN1D	exon	0	2809	0	1.36724	1.08355	-0.516199	-0.0241727	-1.14969	-0.952257	0.56451	-0.559264	0.0982991	0.717246	1.41819	1.20696	0.138975	-0.144756	-2.558	-0.257967	-0.432673
41	chr1-1293394-1294139	752	chr1-1293394-1294139	746	1	ENSG00000131584	1	ACAP3	exon	0	868	0	1.36724	1.08355	-0.516199	-0.0241727	-1.14969	-0.952257	0.56451	-0.559264	0.0982991	0.717246	1.41819	1.20696	0.138975	-0.144756	-2.558	-0.257967	-0.432673
42	chr1-1304313-1305186	752	chr1-1304313-1305186	874	1	ENSG00000131584	1	ACAP3	exon	1	0	0	1.36724	1.08355	-0.516199	-0.0241727	-1.14969	-0.952257	0.56451	-0.559264	0.0982991	0.717246	1.41819	1.20696	0.138975	-0.144756	-2.558	-0.257967	-0.432673
43	chr1-1305415-1305886	752	chr1-1305415-1305886	472	1	ENSG00000131584	1	ACAP3	exon	1	42	0	1.36724	1.08355	-0.516199	-0.0241727	-1.14969	-0.952257	0.56451	-0.559264	0.0982991	0.717246	1.41819	1.20696	0.138975	-0.144756	-2.558	-0.257967	-0.432673
44	chr1-1317915-1318676	752	chr1-1317915-1318676	762	0	ENSG00000127054	1	CPSF3L	promoter	1	464	0	1.36724	1.08355	-0.516199	-0.0241727	-1.14969	-0.952257	0.56451	-0.559264	0.0982991	0.717246	1.41819	1.20696	0.138975	-0.144756	-2.558	-0.257967	-0.432673
45	chr1-1322247-1323168	752	chr1-1322247-1323168	922	1	ENSG00000224051	1	CPTP	exon	1	1341	0	1.36724	1.08355	-0.516199	-0.0241727	-1.14969	-0.952257	0.56451	-0.559264	0.0982991	0.717246	1.41819	1.20696	0.138975	-0.144756	-2.558	-0.257967	-0.432673
46	chr1-1324157-1325401	752	chr1-1324157-1325401	1245	1	ENSG00000224051	1	CPTP	exon	1	0	0	1.36724	1.08355	-0.516199	-0.0241727	-1.14969	-0.952257	0.56451	-0.559264	0.0982991	0.717246	1.41819	1.20696	0.138975	-0.144756	-2.558	-0.257967	-0.432673
47	chr1-1334549-1335422	752	chr1-1334549-1335422	874	1	ENSG00000107404	1	DVL1	exon	0	3234	0	1.36724	1.08355	-0.516199	-0.0241727	-1.14969	-0.952257	0.56451	-0.559264	0.0982991	0.717246	1.41819	1.20696	0.138975	-0.144756	-2.558	-0.257967	-0.432673
48	chr1-1337729-1338032	752	chr1-1337729-1338032	304	1	ENSG00000107404	1	DVL1	exon	0	1389	0	1.36724	1.08355	-0.516199	-0.0241727	-1.14969	-0.952257	0.56451	-0.559264	0.0982991	0.717246	1.41819	1.20696	0.138975	-0.144756	-2.558	-0.257967	-0.432673
49	chr1-1347249-1348325	752	chr1-1347249-1348325	1077	0	ENSG00000107404	1	DVL1	intron	0	629	0	1.36724	1.08355	-0.516199	-0.0241727	-1.14969	-0.952257	0.56451	-0.559264	0.0982991	0.717246	1.41819	1.20696	0.138975	-0.144756	-2.558	-0.257967	-0.432673
50	chr1-1351634-1352479	752	chr1-1351634-1352479	846	0		0		intergenic	0	1767	0	1.36724	1.08355	-0.516199	-0.0241727	-1.14969	-0.952257	0.56451	-0.559264	0.0982991	0.717246	1.41819	1.20696	0.138975	-0.144756	-2.558	-0.257967	-0.432673
51	chr1-1357101-1357385	752	chr1-1357101-1357385	285	0	ENSG00000162576	1	MXRA8	promoter	1	1149	0	1.36724	1.08355	-0.516199	-0.0241727	-1.14969	-0.952257	0.56451	-0.559264	0.0982991	0.717246	1.41819	1.20696	0.138975	-0.144756	-2.558	-0.257967	-0.432673
52	chr1-1357759-1359026	752	chr1-1357759-1359026	1268	1	ENSG00000162576	1	MXRA8	exon	1	0	0	1.36724	1.08355	-0.516199	-0.0241727	-1.14969	-0.952257	0.56451	-0.559264	0.0982991	0.717246	1.41819	1.20696	0.138975	-0.144756	-2.558	-0.257967	-0.432673
53	chr1-1359223-1360206	752	chr1-1359223-1360206	984	0	ENSG00000162576	1	MXRA8	promoter	1	428	0	1.36724	1.08355	-0.516199	-0.0241727	-1.14969	-0.952257	0.56451	-0.559264	0.0982991	0.717246	1.41819	1.20696	0.138975	-0.144756	-2.558	-0.257967	-0.432673
54	chr1-1360432-1360805	752	chr1-1360432-1360805	374	0	ENSG00000162576	1	MXRA8	promoter	1	971	0	1.36724	1.08355	-0.516199	-0.0241727	-1.14969	-0.952257	0.56451	-0.559264	0.0982991	0.717246	1.41819	1.20696	0.138975	-0.144756	-2.558	-0.257967	-0.432673
55	chr1-1362002-1362314	752	chr1-1362002-1362314	313	0	ENSG00000162576	0	MXRA8	promoter	1	224	0	1.36724	1.08355	-0.516199	-0.0241727	-1.14969	-0.952257	0.56451	-0.559264	0.0982991	0.717246	1.41819	1.20696	0.138975	-0.144756	-2.558	-0.257967	-0.432673
56	chr1-1373682-1373925	752	chr1-1373682-1373925	244	1	ENSG00000175756	1	AURKAIP1	exon	0	1218	0	1.36724	1.08355	-0.516199	-0.0241727	-1.14969	-0.952257	0.56451	-0.559264	0.0982991	0.717246	1.41819	1.20696	0.138975	-0.144756	-2.558	-0.257967	-0.432673
57	chr1-1417383-1417616	752	chr1-1417383-1417616	234	0		0		intergenic	0	3474	0	1.36724	1.08355	-0.516199	-0.0241727	-1.14969	-0.952257	0.56451	-0.559264	0.0982991	0.717246	1.41819	1.20696	0.138975	-0.144756	-2.558	-0.257967	-0.432673
58	chr1-1418004-1418854	752	chr1-1418004-1418854	851	1	ENSG00000235098	1	ANKRD65	exon	0	2236	0	1.36724	1.08355	-0.516199	-0.0241727	-1.14969	-0.952257	0.56451	-0.559264	0.0982991	0.717246	1.41819	1.20696	0.138975	-0.144756	-2.558	-0.257967	-0.432673
59	chr1-1426623-1427938	752	chr1-1426623-1427938	1316	1	ENSG00000205116	1	TMEM88B	exon	0	494	0	1.36724	1.08355	-0.516199	-0.0241727	-1.14969	-0.952257	0.56451	-0.559264	0.0982991	0.717246	1.41819	1.20696	0.138975	-0.144756	-2.558	-0.257967	-0.432673
60	chr1-1430053-1430999	752	chr1-1430053-1430999	947	0		0		intergenic	0	3861	0	1.36724	1.08355	-0.516199	-0.0241727	-1.14969	-0.952257	0.56451	-0.559264	0.0982991	0.717246	1.41819	1.20696	0.138975	-0.144756	-2.558	-0.257967	-0.432673
61	chr1-1435258-1435945	752	chr1-1435258-1435945	688	1	ENSG00000179403	1	VWA1	exon	1	0	0	1.36724	1.08355	-0.516199	-0.0241727	-1.14969	-0.952257	0.56451	-0.559264	0.0982991	0.717246	1.41819	1.20696	0.138975	-0.144756	-2.558	-0.257967	-0.432673
62	chr1-1438077-1438478	752	chr1-1438077-1438478	402	0	ENSG00000179403	1	VWA1	intron	0	2341	0	1.36724	1.08355	-0.516199	-0.0241727	-1.14969	-0.952257	0.56451	-0.559264	0.0982991	0.717246	1.41819	1.20696	0.138975	-0.144756	-2.558	-0.257967	-0.432673
63	chr1-1438789-1439509	752	chr1-1438789-1439509	721	1	ENSG00000179403	1	VWA1	exon	0	3053	0	1.36724	1.08355	-0.516199	-0.0241727	-1.14969	-0.952257	0.56451	-0.559264	0.0982991	0.717246	1.41819	1.20696	0.138975	-0.144756	-2.558	-0.257967	-0.432673
64	chr1-1461727-1463008	752	chr1-1461727-1463008	1282	1	ENSG00000215915	1	ATAD3C	exon	1	0	0	1.36724	1.08355	-0.516199	-0.0241727	-1.14969	-0.952257	0.56451	-0.559264	0.0982991	0.717246	1.41819	1.20696	0.138975	-0.144756	-2.558	-0.257967	-0.432673
65	chr1-1469605-1470049	752	chr1-1469605-1470049	445	1	ENSG00000160072	1	ATAD3B	exon	1	1719	0	1.36724	1.08355	-0.516199	-0.0241727	-1.14969	-0.952257	0.56451	-0.559264	0.0982991	0.717246	1.41819	1.20696	0.138975	-0.144756	-2.558	-0.257967	-0.432673
66	chr1-1470628-1471903	752	chr1-1470628-1471903	1276	1	ENSG00000160072	1	ATAD3B	exon	1	0	0	1.36724	1.08355	-0.516199	-0.0241727	-1.14969	-0.952257	0.56451	-0.559264	0.0982991	0.717246	1.41819	1.20696	0.138975	-0.144756	-2.558	-0.257967	-0.432673
67	chr1-1504583-1506071	752	chr1-1504583-1506071	1489	0		0		intergenic	0	6079	0	1.36724	1.08355	-0.516199	-0.0241727	-1.14969	-0.952257	0.56451	-0.559264	0.0982991	0.717246	1.41819	1.20696	0.138975	-0.144756	-2.558	-0.257967	-0.432673
68	chr1-1536517-1537038	752	chr1-1536517-1537038	522	0	ENSG00000205090	1	TMEM240	intron	0	3311	0	1.36724	1.08355	-0.516199	-0.0241727	-1.14969	-0.952257	0.56451	-0.559264	0.0982991	0.717246	1.41819	1.20696	0.138975	-0.144756	-2.558	-0.257967	-0.432673
69	chr1-1541970-1542571	752	chr1-1541970-1542571	602	1	ENSG00000160075	1	SSU72	exon	1	1516	0	1.36724	1.08355	-0.516199	-0.0241727	-1.14969	-0.952257	0.56451	-0.559264	0.0982991	0.717246	1.41819	1.20696	0.138975	-0.144756	-2.558	-0.257967	-0.432673
70	chr1-1594097-1594733	752	chr1-1594097-1594733	637	0		0		intergenic	0	5362	0	1.36724	1.08355	-0.516199	-0.0241727	-1.14969	-0.952257	0.56451	-0.559264	0.0982991	0.717246	1.41819	1.20696	0.138975	-0.144756	-2.558	-0.257967	-0.432673
71	chr1-1596782-1597944	752	chr1-1596782-1597944	1163	0		0		intergenic	0	2151	0	1.36724	1.08355	-0.516199	-0.0241727	-1.14969	-0.952257	0.56451	-0.559264	0.0982991	0.717246	1.41819	1.20696	0.138975	-0.144756	-2.558	-0.257967	-0.432673
72	chr1-1611047-1611640	752	chr1-1611047-1611640	594	0		0		intergenic	0	3774	0	1.36724	1.08355	-0.516199	-0.0241727	-1.14969	-0.952257	0.56451	-0.559264	0.0982991	0.717246	1.41819	1.20696	0.138975	-0.144756	-2.558	-0.257967	-0.432673
73	chr1-1658527-1659548	752	chr1-1658527-1659548	1022	1	ENSG00000189339	1	SLC35E2B	exon	1	0	0	1.36724	1.08355	-0.516199	-0.0241727	-1.14969	-0.952257	0.56451	-0.559264	0.0982991	0.717246	1.41819	1.20696	0.138975	-0.144756	-2.558	-0.257967	-0.432673
74	chr1-1680330-1681181	752	chr1-1680330-1681181	852	0	ENSG00000189339	1	SLC35E2B	intron	0	10190	0	1.36724	1.08355	-0.516199	-0.0241727	-1.14969	-0.952257	0.56451	-0.559264	0.0982991	0.717246	1.41819	1.20696	0.138975	-0.144756	-2.558	-0.257967	-0.432673
75	chr1-1683065-1684269	752	chr1-1683065-1684269	1205	0	ENSG00000189339	1	SLC35E2B	intron	0	8374	0	1.36724	1.08355	-0.516199	-0.0241727	-1.14969	-0.952257	0.56451	-0.559264	0.0982991	0.717246	1.41819	1.20696	0.138975	-0.144756	-2.558	-0.257967	-0.432673
76	chr1-1692194-1693278	752	chr1-1692194-1693278	1085	1	ENSG00000189339	1	SLC35E2B	exon	1	0	0	1.36724	1.08355	-0.516199	-0.0241727	-1.14969	-0.952257	0.56451	-0.559264	0.0982991	0.717246	1.41819	1.20696	0.138975	-0.144756	-2.558	-0.257967	-0.432673
77	chr1-1723835-1724837	752	chr1-1723835-1724837	1003	1	ENSG00000008128	1	CDK11A	exon	1	0	0	1.36724	1.08355	-0.516199	-0.0241727	-1.14969	-0.952257	0.56451	-0.559264	0.0982991	0.717246	1.41819	1.20696	0.138975	-0.144756	-2.558	-0.257967	-0.432673
78	chr1-1745619-1746558	752	chr1-1745619-1746558	940	1	ENSG00000215790	1	SLC35E2	exon	1	0	0	1.36724	1.08355	-0.516199	-0.0241727	-1.14969	-0.952257	0.56451	-0.559264	0.0982991	0.717246	1.41819	1.20696	0.138975	-0.144756	-2.558	-0.257967	-0.432673
79	chr1-1758665-1759171	752	chr1-1758665-1759171	507	1	ENSG00000008130	1	NADK	exon	1	89	0	1.36724	1.08355	-0.516199	-0.0241727	-1.14969	-0.952257	0.56451	-0.559264	0.0982991	0.717246	1.41819	1.20696	0.138975	-0.144756	-2.558	-0.257967	-0.432673
80	chr1-1763971-1764626	752	chr1-1763971-1764626	656	0	ENSG00000008130	1	NADK	intron	0	5395	0	1.36724	1.08355	-0.516199	-0.0241727	-1.14969	-0.952257	0.56451	-0.559264	0.0982991	0.717246	1.41819	1.20696	0.138975	-0.144756	-2.558	-0.257967	-0.432673
81	chr1-1852568-1853467	752	chr1-1852568-1853467	900	0	ENSG00000078369	1	GNB1	intron	0	20282	0	1.36724	1.08355	-0.516199	-0.0241727	-1.14969	-0.952257	0.56451	-0.559264	0.0982991	0.717246	1.41819	1.20696	0.138975	-0.144756	-2.558	-0.257967	-0.432673
82	chr1-1943794-1944564	752	chr1-1943794-1944564	771	1	ENSG00000142609	1	CFAP74	exon	0	15541	0	1.36724	1.08355	-0.516199	-0.0241727	-1.14969	-0.952257	0.56451	-0.559264	0.0982991	0.717246	1.41819	1.20696	0.138975	-0.144756	-2.558	-0.257967	-0.432673
83	chr1-1955344-1956411	752	chr1-1955344-1956411	1068	1	ENSG00000142609	1	CFAP74	exon	0	3694	0	1.36724	1.08355	-0.516199	-0.0241727	-1.14969	-0.952257	0.56451	-0.559264	0.0982991	0.717246	1.41819	1.20696	0.138975	-0.144756	-2.558	-0.257967	-0.432673
84	chr1-1959641-1960955	752	chr1-1959641-1960955	1315	1	ENSG00000142609	1	CFAP74	exon	1	0	0	1.36724	1.08355	-0.516199	-0.0241727	-1.14969	-0.952257	0.56451	-0.559264	0.0982991	0.717246	1.41819	1.20696	0.138975	-0.144756	-2.558	-0.257967	-0.432673
85	chr1-2003260-2004195	752	chr1-2003260-2004195	936	1	ENSG00000142609	1	CFAP74	exon	1	0	0	1.36724	1.08355	-0.516199	-0.0241727	-1.14969	-0.952257	0.56451	-0.559264	0.0982991	0.717246	1.41819	1.20696	0.138975	-0.144756	-2.558	-0.257967	-0.432673
86	chr1-2031939-2033131	752	chr1-2031939-2033131	1193	0		0		intergenic	0	12614	0	1.36724	1.08355	-0.516199	-0.0241727	-1.14969	-0.952257	0.56451	-0.559264	0.0982991	0.717246	1.41819	1.20696	0.138975	-0.144756	-2.558	-0.257967	-0.432673
87	chr1-2046464-2046736	752	chr1-2046464-2046736	273	0		0		intergenic	0	3733	0	1.36724	1.08355	-0.516199	-0.0241727	-1.14969	-0.952257	0.56451	-0.559264	0.0982991	0.717246	1.41819	1.20696	0.138975	-0.144756	-2.558	-0.257967	-0.432673
88	chr1-2165675-2166078	752	chr1-2165675-2166078	404	0	ENSG00000067606	1	PRKCZ	intron	0	2769	0	1.36724	1.08355	-0.516199	-0.0241727	-1.14969	-0.952257	0.56451	-0.559264	0.0982991	0.717246	1.41819	1.20696	0.138975	-0.144756	-2.558	-0.257967	-0.432673
89	chr1-2251385-2252642	752	chr1-2251385-2252642	1258	0	ENSG00000157933	1	SKI	intron	0	3388	0	1.36724	1.08355	-0.516199	-0.0241727	-1.14969	-0.952257	0.56451	-0.559264	0.0982991	0.717246	1.41819	1.20696	0.138975	-0.144756	-2.558	-0.257967	-0.432673
90	chr1-2306438-2306935	752	chr1-2306438-2306935	498	1	ENSG00000157933	1	SKI	exon	0	2791	0	1.36724	1.08355	-0.516199	-0.0241727	-1.14969	-0.952257	0.56451	-0.559264	0.0982991	0.717246	1.41819	1.20696	0.138975	-0.144756	-2.558	-0.257967	-0.432673
91	chr1-2403295-2403575	752	chr1-2403295-2403575	281	1	ENSG00000157916	1	RER1	exon	0	1343	0	1.36724	1.08355	-0.516199	-0.0241727	-1.14969	-0.952257	0.56451	-0.559264	0.0982991	0.717246	1.41819	1.20696	0.138975	-0.144756	-2.558	-0.257967	-0.432673
92	chr1-2404045-2405481	752	chr1-2404045-2405481	1437	1	ENSG00000157911	1	PEX10	exon	0	2093	0	1.36724	1.08355	-0.516199	-0.0241727	-1.14969	-0.952257	0.56451	-0.559264	0.0982991	0.717246	1.41819	1.20696	0.138975	-0.144756	-2.558	-0.257967	-0.432673
93	chr1-2433964-2434817	752	chr1-2433964-2434817	854	0	ENSG00000149527	1	PLCH2	intron	0	7983	0	1.36724	1.08355	-0.516199	-0.0241727	-1.14969	-0.952257	0.56451	-0.559264	0.0982991	0.717246	1.41819	1.20696	0.138975	-0.144756	-2.558	-0.257967	-0.432673
94	chr1-817738-818526	752	chr1-817738-818526	789	0		0		intergenic	0	105401	0	1.36724	1.08355	-0.516199	-0.0241727	-1.14969	-0.952257	0.56451	-0.559264	0.0982991	0.717246	1.41819	1.20696	0.138975	-0.144756	-2.558	-0.257967	-0.432673
95	chr1-920500-921388	752	chr1-920500-921388	889	0		0		intergenic	0	2539	0	1.36724	1.08355	-0.516199	-0.0241727	-1.14969	-0.952257	0.56451	-0.559264	0.0982991	0.717246	1.41819	1.20696	0.138975	-0.144756	-2.558	-0.257967	-0.432673
96	chr1-923460-924250	752	chr1-923460-924250	791	1	ENSG00000187634	1	SAMD11	exon	1	0	0	1.36724	1.08355	-0.516199	-0.0241727	-1.14969	-0.952257	0.56451	-0.559264	0.0982991	0.717246	1.41819	1.20696	0.138975	-0.144756	-2.558	-0.257967	-0.432673
97	chr1-939768-941059	752	chr1-939768-941059	1292	1	ENSG00000187634	1	SAMD11	exon	1	0	0	1.36724	1.08355	-0.516199	-0.0241727	-1.14969	-0.952257	0.56451	-0.559264	0.0982991	0.717246	1.41819	1.20696	0.138975	-0.144756	-2.558	-0.257967	-0.432673
98	chr1-941261-942309	752	chr1-941261-942309	1049	1	ENSG00000187634	1	SAMD11	exon	1	0	0	1.36724	1.08355	-0.516199	-0.0241727	-1.14969	-0.952257	0.56451	-0.559264	0.0982991	0.717246	1.41819	1.20696	0.138975	-0.144756	-2.558	-0.257967	-0.432673
99	chr1-943026-943460	752	chr1-943026-943460	435	1	ENSG00000187634	1	SAMD11	exon	0	859	0	1.36724	1.08355	-0.516199	-0.0241727	-1.14969	-0.952257	0.56451	-0.559264	0.0982991	0.717246	1.41819	1.20696	0.138975	-0.144756	-2.558	-0.257967	-0.432673
100	chr1-943880-945094	752	chr1-943880-945094	1215	1	ENSG00000188976	1	NOC2L	exon	0	467	0	1.36724	1.08355	-0.516199	-0.0241727	-1.14969	-0.952257	0.56451	-0.559264	0.0982991	0.717246	1.41819	1.20696	0.138975	-0.144756	-2.558	-0.257967	-0.432673
101	chr1-951271-951718	752	chr1-951271-951718	448	0	ENSG00000188976	1	NOC2L	intron	0	4210	0	1.36724	1.08355	-0.516199	-0.0241727	-1.14969	-0.952257	0.56451	-0.559264	0.0982991	0.717246	1.41819	1.20696	0.138975	-0.144756	-2.558	-0.257967	-0.432673
102	chr1-958477-959585	752	chr1-958477-959585	1109	1	ENSG00000187961	1	KLHL17	exon	1	0	0	1.36724	1.08355	-0.516199	-0.0241727	-1.14969	-0.952257	0.56451	-0.559264	0.0982991	0.717246	1.41819	1.20696	0.138975	-0.144756	-2.558	-0.257967	-0.432673
103	chr1-967963-968410	752	chr1-967963-968410	448	0	ENSG00000187583	1	PLEKHN1	intron	0	1460	0	1.36724	1.08355	-0.516199	-0.0241727	-1.14969	-0.952257	0.56451	-0.559264	0.0982991	0.717246	1.41819	1.20696	0.138975	-0.144756	-2.558	-0.257967	-0.432673
104	chr1-975563-976758	752	chr1-975563-976758	1196	1	ENSG00000187642	1	PERM1	exon	1	0	0	1.36724	1.08355	-0.516199	-0.0241727	-1.14969	-0.952257	0.56451	-0.559264	0.0982991	0.717246	1.41819	1.20696	0.138975	-0.144756	-2.558	-0.257967	-0.432673
105	chr1-100528623-100529486	2	chr1-100528623-100529486	864	0		0		intergenic	0	8650	0	-0.709829	-0.59718	-0.617532	-0.666889	-0.747978	-0.763032	-0.731488	2.58254	1.3496	1.09228	1.46951	-0.21509	0.400512	0.259804	-0.805685	-0.762766	-0.536768
106	chr1-100530396-100531210	2	chr1-100530396-100531210	815	0		0		intergenic	0	6926	0	-0.709829	-0.59718	-0.617532	-0.666889	-0.747978	-0.763032	-0.731488	2.58254	1.3496	1.09228	1.46951	-0.21509	0.400512	0.259804	-0.805685	-0.762766	-0.536768
107	chr1-100794511-100795655	2	chr1-100794511-100795655	1145	0		0		intergenic	0	59335	0	-0.709829	-0.59718	-0.617532	-0.666889	-0.747978	-0.763032	-0.731488	2.58254	1.3496	1.09228	1.46951	-0.21509	0.400512	0.259804	-0.805685	-0.762766	-0.536768
108	chr1-100882654-100883142	4	chr1-100882654-100883142	489	0	ENSG00000162694	1	EXTL2	intron	0	11521	0	-0.395632	-0.560595	0.0172839	0.250537	0.540587	1.90762	-0.319705	-0.170332	-0.676088	-0.652709	-0.797864	-0.473786	-0.685394	0.0808255	3.08566	-0.58484	-0.565569
109	chr1-100909105-100910178	4	chr1-100909105-100910178	1074	0	ENSG00000162695	1	SLC30A7	intron	0	12850	0	-0.395632	-0.560595	0.0172839	0.250537	0.540587	1.90762	-0.319705	-0.170332	-0.676088	-0.652709	-0.797864	-0.473786	-0.685394	0.0808255	3.08566	-0.58484	-0.565569
110	chr1-100990754-100991355	4	chr1-100990754-100991355	602	0	ENSG00000117543	1	DPH5	intron	0	3794	0	-0.395632	-0.560595	0.0172839	0.250537	0.540587	1.90762	-0.319705	-0.170332	-0.676088	-0.652709	-0.797864	-0.473786	-0.685394	0.0808255	3.08566	-0.58484	-0.565569
111	chr1-100994779-100995996	4	chr1-100994779-100995996	1218	1	ENSG00000117543	1	DPH5	exon	1	0	0	-0.395632	-0.560595	0.0172839	0.250537	0.540587	1.90762	-0.319705	-0.170332	-0.676088	-0.652709	-0.797864	-0.473786	-0.685394	0.0808255	3.08566	-0.58484	-0.565569
112	chr1-101002585-101003386	4	chr1-101002585-101003386	802	0	ENSG00000117543	1	DPH5	intron	0	7434	0	-0.395632	-0.560595	0.0172839	0.250537	0.540587	1.90762	-0.319705	-0.170332	-0.676088	-0.652709	-0.797864	-0.473786	-0.685394	0.0808255	3.08566	-0.58484	-0.565569
113	chr1-101006427-101006945	4	chr1-101006427-101006945	519	0	ENSG00000117543	1	DPH5	intron	0	11276	0	-0.395632	-0.560595	0.0172839	0.250537	0.540587	1.90762	-0.319705	-0.170332	-0.676088	-0.652709	-0.797864	-0.473786	-0.685394	0.0808255	3.08566	-0.58484	-0.565569
114	chr1-101161413-101162570	4	chr1-101161413-101162570	1158	0		0		intergenic	0	74317	0	-0.395632	-0.560595	0.0172839	0.250537	0.540587	1.90762	-0.319705	-0.170332	-0.676088	-0.652709	-0.797864	-0.473786	-0.685394	0.0808255	3.08566	-0.58484	-0.565569
115	chr1-101162774-101163510	4	chr1-101162774-101163510	737	0		0		intergenic	0	73377	0	-0.395632	-0.560595	0.0172839	0.250537	0.540587	1.90762	-0.319705	-0.170332	-0.676088	-0.652709	-0.797864	-0.473786	-0.685394	0.0808255	3.08566	-0.58484	-0.565569
116	chr1-101203199-101203655	4	chr1-101203199-101203655	457	0		0		intergenic	0	33232	0	-0.395632	-0.560595	0.0172839	0.250537	0.540587	1.90762	-0.319705	-0.170332	-0.676088	-0.652709	-0.797864	-0.473786	-0.685394	0.0808255	3.08566	-0.58484	-0.565569
117	chr1-101203874-101205277	4	chr1-101203874-101205277	1404	0		0		intergenic	0	31610	0	-0.395632	-0.560595	0.0172839	0.250537	0.540587	1.90762	-0.319705	-0.170332	-0.676088	-0.652709	-0.797864	-0.473786	-0.685394	0.0808255	3.08566	-0.58484	-0.565569
118	chr1-101237998-101239078	4	chr1-101237998-101239078	1081	1	ENSG00000170989	1	S1PR1	exon	1	0	0	-0.395632	-0.560595	0.0172839	0.250537	0.540587	1.90762	-0.319705	-0.170332	-0.676088	-0.652709	-0.797864	-0.473786	-0.685394	0.0808255	3.08566	-0.58484	-0.565569
119	chr1-101239422-101239632	4	chr1-101239422-101239632	211	1	ENSG00000170989	1	S1PR1	exon	0	1331	0	-0.395632	-0.560595	0.0172839	0.250537	0.540587	1.90762	-0.319705	-0.170332	-0.676088	-0.652709	-0.797864	-0.473786	-0.685394	0.0808255	3.08566	-0.58484	-0.565569
120	chr1-101240001-101240288	4	chr1-101240001-101240288	288	1	ENSG00000170989	1	S1PR1	exon	0	1910	0	-0.395632	-0.560595	0.0172839	0.250537	0.540587	1.90762	-0.319705	-0.170332	-0.676088	-0.652709	-0.797864	-0.473786	-0.685394	0.0808255	3.08566	-0.58484	-0.565569
121	chr1-101241974-101242826	4	chr1-101241974-101242826	853	0		0		intergenic	0	3883	0	-0.395632	-0.560595	0.0172839	0.250537	0.540587	1.90762	-0.319705	-0.170332	-0.676088	-0.652709	-0.797864	-0.473786	-0.685394	0.0808255	3.08566	-0.58484	-0.565569
122	chr1-101264563-101265179	4	chr1-101264563-101265179	617	0		0		intergenic	0	26472	0	-0.395632	-0.560595	0.0172839	0.250537	0.540587	1.90762	-0.319705	-0.170332	-0.676088	-0.652709	-0.797864	-0.473786	-0.685394	0.0808255	3.08566	-0.58484	-0.565569
123	chr1-101288080-101288984	4	chr1-101288080-101288984	905	0		0		intergenic	0	49989	0	-0.395632	-0.560595	0.0172839	0.250537	0.540587	1.90762	-0.319705	-0.170332	-0.676088	-0.652709	-0.797864	-0.473786	-0.685394	0.0808255	3.08566	-0.58484	-0.565569
124	chr1-101300899-101301282	4	chr1-101300899-101301282	384	0		0		intergenic	0	62808	0	-0.395632	-0.560595	0.0172839	0.250537	0.540587	1.90762	-0.319705	-0.170332	-0.676088	-0.652709	-0.797864	-0.473786	-0.685394	0.0808255	3.08566	-0.58484	-0.565569
125	chr1-101344234-101345234	4	chr1-101344234-101345234	1001	0		0		intergenic	0	106143	0	-0.395632	-0.560595	0.0172839	0.250537	0.540587	1.90762	-0.319705	-0.170332	-0.676088	-0.652709	-0.797864	-0.473786	-0.685394	0.0808255	3.08566	-0.58484	-0.565569
126	chr1-101431903-101432923	4	chr1-101431903-101432923	1021	0		0		intergenic	0	193812	0	-0.395632	-0.560595	0.0172839	0.250537	0.540587	1.90762	-0.319705	-0.170332	-0.676088	-0.652709	-0.797864	-0.473786	-0.685394	0.0808255	3.08566	-0.58484	-0.565569
127	chr1-101451365-101452175	4	chr1-101451365-101452175	811	0		0		intergenic	0	213274	0	-0.395632	-0.560595	0.0172839	0.250537	0.540587	1.90762	-0.319705	-0.170332	-0.676088	-0.652709	-0.797864	-0.473786	-0.685394	0.0808255	3.08566	-0.58484	-0.565569
128	chr1-101846610-101847979	7	chr1-101846610-101847979	1370	1	ENSG00000118733	1	OLFM3	exon	1	0	0	-0.570068	0.331741	1.15828	1.03934	1.82962	1.55188	1.18726	0.639821	-0.120179	-1.06859	-0.884451	-0.856216	-0.819186	-1.27088	-0.923239	-0.550952	-0.674183
129	chr1-101995990-101997397	7	chr1-101995990-101997397	1408	1	ENSG00000118733	1	OLFM3	exon	1	0	0	-0.570068	0.331741	1.15828	1.03934	1.82962	1.55188	1.18726	0.639821	-0.120179	-1.06859	-0.884451	-0.856216	-0.819186	-1.27088	-0.923239	-0.550952	-0.674183
130	chr1-102191581-102192357	7	chr1-102191581-102192357	777	0		0		intergenic	0	194550	0	-0.570068	0.331741	1.15828	1.03934	1.82962	1.55188	1.18726	0.639821	-0.120179	-1.06859	-0.884451	-0.856216	-0.819186	-1.27088	-0.923239	-0.550952	-0.674183
131	chr1-101905070-101906027	6	chr1-101905070-101906027	958	0	ENSG00000118733	1	OLFM3	intron	0	4126	0	-0.64071	0.038559	-0.733864	-0.83982	-0.773707	-0.904935	-0.680385	0.700466	2.26694	0.18426	2.07674	-0.0802683	1.48797	-0.784139	-0.218829	-0.528352	-0.569925
132	chr1-101915396-101916080	6	chr1-101915396-101916080	685	0	ENSG00000118733	1	OLFM3	intron	0	5241	0	-0.64071	0.038559	-0.733864	-0.83982	-0.773707	-0.904935	-0.680385	0.700466	2.26694	0.18426	2.07674	-0.0802683	1.48797	-0.784139	-0.218829	-0.528352	-0.569925
133	chr1-101964734-101965854	6	chr1-101964734-101965854	1121	0	ENSG00000118733	1	OLFM3	intron	0	31050	0	-0.64071	0.038559	-0.733864	-0.83982	-0.773707	-0.904935	-0.680385	0.700466	2.26694	0.18426	2.07674	-0.0802683	1.48797	-0.784139	-0.218829	-0.528352	-0.569925
134	chr1-10217528-10218433	763	chr1-10217528-10218433	906	0	ENSG00000054523	1	KIF1B	intron	0	5911	0	1.70124	0.698336	1.28397	0.987823	1.04772	1.35506	0.511114	-0.864045	-1.12622	-0.382822	-1.24691	-1.20687	-1.19943	-0.00457232	-0.802362	-0.736976	-0.0150523
135	chr1-9623541-9623945	763	chr1-9623541-9623945	405	0		0		intergenic	0	15812	0	1.70124	0.698336	1.28397	0.987823	1.04772	1.35506	0.511114	-0.864045	-1.12622	-0.382822	-1.24691	-1.20687	-1.19943	-0.00457232	-0.802362	-0.736976	-0.0150523
136	chr1-9687097-9688123	763	chr1-9687097-9688123	1027	0	ENSG00000171608	1	PIK3CD	promoter	1	52	0	1.70124	0.698336	1.28397	0.987823	1.04772	1.35506	0.511114	-0.864045	-1.12622	-0.382822	-1.24691	-1.20687	-1.19943	-0.00457232	-0.802362	-0.736976	-0.0150523
137	chr1-9688959-9690439	763	chr1-9688959-9690439	1481	0	ENSG00000171608	1	PIK3CD	intron	0	782	0	1.70124	0.698336	1.28397	0.987823	1.04772	1.35506	0.511114	-0.864045	-1.12622	-0.382822	-1.24691	-1.20687	-1.19943	-0.00457232	-0.802362	-0.736976	-0.0150523
138	chr1-9755165-9756361	763	chr1-9755165-9756361	1197	1	ENSG00000171603	1	CLSTN1	exon	0	3583	0	1.70124	0.698336	1.28397	0.987823	1.04772	1.35506	0.511114	-0.864045	-1.12622	-0.382822	-1.24691	-1.20687	-1.19943	-0.00457232	-0.802362	-0.736976	-0.0150523
139	chr1-9766676-9767148	763	chr1-9766676-9767148	473	0	ENSG00000171603	1	CLSTN1	intron	0	15094	0	1.70124	0.698336	1.28397	0.987823	1.04772	1.35506	0.511114	-0.864045	-1.12622	-0.382822	-1.24691	-1.20687	-1.19943	-0.00457232	-0.802362	-0.736976	-0.0150523
140	chr1-9768005-9768541	763	chr1-9768005-9768541	537	0	ENSG00000171603	1	CLSTN1	intron	0	16423	0	1.70124	0.698336	1.28397	0.987823	1.04772	1.35506	0.511114	-0.864045	-1.12622	-0.382822	-1.24691	-1.20687	-1.19943	-0.00457232	-0.802362	-0.736976	-0.0150523
141	chr1-9788748-9789248	763	chr1-9788748-9789248	501	0	ENSG00000171603	1	CLSTN1	intron	0	34735	0	1.70124	0.698336	1.28397	0.987823	1.04772	1.35506	0.511114	-0.864045	-1.12622	-0.382822	-1.24691	-1.20687	-1.19943	-0.00457232	-0.802362	-0.736976	-0.0150523
142	chr1-9792060-9792927	763	chr1-9792060-9792927	868	0	ENSG00000171603	1	CLSTN1	intron	0	31056	0	1.70124	0.698336	1.28397	0.987823	1.04772	1.35506	0.511114	-0.864045	-1.12622	-0.382822	-1.24691	-1.20687	-1.19943	-0.00457232	-0.802362	-0.736976	-0.0150523
143	chr1-9849889-9851162	763	chr1-9849889-9851162	1274	1	ENSG00000178585	1	CTNNBIP1	exon	0	21630	0	1.70124	0.698336	1.28397	0.987823	1.04772	1.35506	0.511114	-0.864045	-1.12622	-0.382822	-1.24691	-1.20687	-1.19943	-0.00457232	-0.802362	-0.736976	-0.0150523
144	chr1-9862553-9863667	763	chr1-9862553-9863667	1115	0	ENSG00000178585	1	CTNNBIP1	intron	0	14508	0	1.70124	0.698336	1.28397	0.987823	1.04772	1.35506	0.511114	-0.864045	-1.12622	-0.382822	-1.24691	-1.20687	-1.19943	-0.00457232	-0.802362	-0.736976	-0.0150523
145	chr1-9960632-9961603	763	chr1-9960632-9961603	972	0	ENSG00000173614	1	NMNAT1	intron	0	17143	0	1.70124	0.698336	1.28397	0.987823	1.04772	1.35506	0.511114	-0.864045	-1.12622	-0.382822	-1.24691	-1.20687	-1.19943	-0.00457232	-0.802362	-0.736976	-0.0150523
146	chr1-103043983-103045164	8	chr1-103043983-103045164	1182	0	ENSG00000060718	1	COL11A1	intron	0	12769	0	-0.548832	2.04089	3.08571	-0.371913	0.375968	0.33262	-0.403985	0.0571865	-0.193486	-0.602665	-0.502697	-0.564627	-0.475184	-0.609591	-0.599126	-0.454591	-0.565681
147	chr1-103080711-103081372	8	chr1-103080711-103081372	662	0	ENSG00000060718	1	COL11A1	intron	0	1486	0	-0.548832	2.04089	3.08571	-0.371913	0.375968	0.33262	-0.403985	0.0571865	-0.193486	-0.602665	-0.502697	-0.564627	-0.475184	-0.609591	-0.599126	-0.454591	-0.565681
148	chr1-103180518-103181148	8	chr1-103180518-103181148	631	0		0		intergenic	0	72021	0	-0.548832	2.04089	3.08571	-0.371913	0.375968	0.33262	-0.403985	0.0571865	-0.193486	-0.602665	-0.502697	-0.564627	-0.475184	-0.609591	-0.599126	-0.454591	-0.565681
149	chr1-10339466-10340124	14	chr1-10339466-10340124	659	1	ENSG00000054523	1	KIF1B	exon	0	4650	0	-0.126983	-0.573156	-0.639889	-0.377527	-0.549973	-0.597296	-0.091002	-0.277098	-0.58607	-0.128544	-0.497968	-0.299724	0.21985	-0.00627762	3.76943	0.14256	0.61967
150	chr1-10510423-10511298	14	chr1-10510423-10511298	876	0	ENSG00000142655	1	PEX14	intron	0	24589	0	-0.126983	-0.573156	-0.639889	-0.377527	-0.549973	-0.597296	-0.091002	-0.277098	-0.58607	-0.128544	-0.497968	-0.299724	0.21985	-0.00627762	3.76943	0.14256	0.61967
151	chr1-10630464-10630925	14	chr1-10630464-10630925	462	1	ENSG00000142655	1	PEX14	exon	0	7837	0	-0.126983	-0.573156	-0.639889	-0.377527	-0.549973	-0.597296	-0.091002	-0.277098	-0.58607	-0.128544	-0.497968	-0.299724	0.21985	-0.00627762	3.76943	0.14256	0.61967
152	chr1-10667658-10668716	14	chr1-10667658-10668716	1059	0	ENSG00000130940	1	CASZ1	intron	0	6259	0	-0.126983	-0.573156	-0.639889	-0.377527	-0.549973	-0.597296	-0.091002	-0.277098	-0.58607	-0.128544	-0.497968	-0.299724	0.21985	-0.00627762	3.76943	0.14256	0.61967
153	chr1-10679355-10679989	14	chr1-10679355-10679989	635	0	ENSG00000130940	1	CASZ1	intron	0	13922	0	-0.126983	-0.573156	-0.639889	-0.377527	-0.549973	-0.597296	-0.091002	-0.277098	-0.58607	-0.128544	-0.497968	-0.299724	0.21985	-0.00627762	3.76943	0.14256	0.61967
154	chr1-10788510-10789030	14	chr1-10788510-10789030	521	0	ENSG00000130940	1	CASZ1	intron	0	7617	0	-0.126983	-0.573156	-0.639889	-0.377527	-0.549973	-0.597296	-0.091002	-0.277098	-0.58607	-0.128544	-0.497968	-0.299724	0.21985	-0.00627762	3.76943	0.14256	0.61967
155	chr1-103479067-103479970	9	chr1-103479067-103479970	904	0		0		intergenic	0	45720	0	-0.513436	-0.275876	1.68445	0.149078	3.04336	1.20585	-0.224938	-0.0808987	-0.12825	-0.706367	-0.553822	-0.638199	-0.493415	-0.695124	-0.665128	-0.642884	-0.464396
156	chr1-103580254-103581362	9	chr1-103580254-103581362	1109	0		0		intergenic	0	2866	0	-0.513436	-0.275876	1.68445	0.149078	3.04336	1.20585	-0.224938	-0.0808987	-0.12825	-0.706367	-0.553822	-0.638199	-0.493415	-0.695124	-0.665128	-0.642884	-0.464396
157	chr1-103949241-103950437	9	chr1-103949241-103950437	1197	0		0		intergenic	0	198834	0	-0.513436	-0.275876	1.68445	0.149078	3.04336	1.20585	-0.224938	-0.0808987	-0.12825	-0.706367	-0.553822	-0.638199	-0.493415	-0.695124	-0.665128	-0.642884	-0.464396
158	chr1-10514280-10514719	12	chr1-10514280-10514719	440	0	ENSG00000142655	1	PEX14	intron	0	21168	0	-0.536071	-0.117131	-0.176764	-0.485083	0.345247	0.163555	-0.110319	-0.617378	-0.629895	-0.608191	-0.538374	-0.572681	-0.0796967	1.10878	-0.37402	3.60435	-0.376333
159	chr1-10514903-10515152	12	chr1-10514903-10515152	250	0	ENSG00000142655	1	PEX14	intron	0	20735	0	-0.536071	-0.117131	-0.176764	-0.485083	0.345247	0.163555	-0.110319	-0.617378	-0.629895	-0.608191	-0.538374	-0.572681	-0.0796967	1.10878	-0.37402	3.60435	-0.376333
160	chr1-10515418-10515947	12	chr1-10515418-10515947	530	0	ENSG00000142655	1	PEX14	intron	0	19940	0	-0.536071	-0.117131	-0.176764	-0.485083	0.345247	0.163555	-0.110319	-0.617378	-0.629895	-0.608191	-0.538374	-0.572681	-0.0796967	1.10878	-0.37402	3.60435	-0.376333
161	chr1-10516791-10517672	49	chr1-10516791-10517672	882	1	ENSG00000142655	1	PEX14	exon	0	18215	0	-0.573388	-0.0470687	1.35983	0.959599	2.30777	1.6596	0.659269	-0.530614	-0.685953	-1.03167	-0.974119	-0.536436	-0.640571	-1.0627	-0.600956	0.313645	-0.576242
162	chr1-10518707-10519661	49	chr1-10518707-10519661	955	0	ENSG00000142655	1	PEX14	intron	0	16226	0	-0.573388	-0.0470687	1.35983	0.959599	2.30777	1.6596	0.659269	-0.530614	-0.685953	-1.03167	-0.974119	-0.536436	-0.640571	-1.0627	-0.600956	0.313645	-0.576242
163	chr1-10598934-10599813	49	chr1-10598934-10599813	880	1	ENSG00000142655	1	PEX14	exon	0	38949	0	-0.573388	-0.0470687	1.35983	0.959599	2.30777	1.6596	0.659269	-0.530614	-0.685953	-1.03167	-0.974119	-0.536436	-0.640571	-1.0627	-0.600956	0.313645	-0.576242
164	chr1-10704133-10704981	49	chr1-10704133-10704981	849	1	ENSG00000130940	1	CASZ1	exon	0	593	0	-0.573388	-0.0470687	1.35983	0.959599	2.30777	1.6596	0.659269	-0.530614	-0.685953	-1.03167	-0.974119	-0.536436	-0.640571	-1.0627	-0.600956	0.313645	-0.576242
165	chr1-10720374-10720892	49	chr1-10720374-10720892	519	0	ENSG00000130940	1	CASZ1	intron	0	14798	0	-0.573388	-0.0470687	1.35983	0.959599	2.30777	1.6596	0.659269	-0.530614	-0.685953	-1.03167	-0.974119	-0.536436	-0.640571	-1.0627	-0.600956	0.313645	-0.576242
166	chr1-10736489-10737852	49	chr1-10736489-10737852	1364	0	ENSG00000130940	1	CASZ1	intron	0	30913	0	-0.573388	-0.0470687	1.35983	0.959599	2.30777	1.6596	0.659269	-0.530614	-0.685953	-1.03167	-0.974119	-0.536436	-0.640571	-1.0627	-0.600956	0.313645	-0.576242
167	chr1-10738171-10738586	49	chr1-10738171-10738586	416	0	ENSG00000130940	1	CASZ1	intron	0	32595	0	-0.573388	-0.0470687	1.35983	0.959599	2.30777	1.6596	0.659269	-0.530614	-0.685953	-1.03167	-0.974119	-0.536436	-0.640571	-1.0627	-0.600956	0.313645	-0.576242
168	chr1-10743237-10744240	49	chr1-10743237-10744240	1004	0	ENSG00000130940	1	CASZ1	intron	0	37661	0	-0.573388	-0.0470687	1.35983	0.959599	2.30777	1.6596	0.659269	-0.530614	-0.685953	-1.03167	-0.974119	-0.536436	-0.640571	-1.0627	-0.600956	0.313645	-0.576242
169	chr1-10751506-10752666	49	chr1-10751506-10752666	1161	0	ENSG00000130940	1	CASZ1	intron	0	43981	0	-0.573388	-0.0470687	1.35983	0.959599	2.30777	1.6596	0.659269	-0.530614	-0.685953	-1.03167	-0.974119	-0.536436	-0.640571	-1.0627	-0.600956	0.313645	-0.576242
170	chr1-10755246-10756562	49	chr1-10755246-10756562	1317	0	ENSG00000130940	1	CASZ1	intron	0	40085	0	-0.573388	-0.0470687	1.35983	0.959599	2.30777	1.6596	0.659269	-0.530614	-0.685953	-1.03167	-0.974119	-0.536436	-0.640571	-1.0627	-0.600956	0.313645	-0.576242
171	chr1-10779255-10779558	49	chr1-10779255-10779558	304	0	ENSG00000130940	1	CASZ1	intron	0	17089	0	-0.573388	-0.0470687	1.35983	0.959599	2.30777	1.6596	0.659269	-0.530614	-0.685953	-1.03167	-0.974119	-0.536436	-0.640571	-1.0627	-0.600956	0.313645	-0.576242
172	chr1-10879810-10880447	49	chr1-10879810-10880447	638	0		0		intergenic	0	67422	0	-0.573388	-0.0470687	1.35983	0.959599	2.30777	1.6596	0.659269	-0.530614	-0.685953	-1.03167	-0.974119	-0.536436	-0.640571	-1.0627	-0.600956	0.313645	-0.576242
173	chr1-10897790-10898921	49	chr1-10897790-10898921	1132	0		0		intergenic	0	48948	0	-0.573388	-0.0470687	1.35983	0.959599	2.30777	1.6596	0.659269	-0.530614	-0.685953	-1.03167	-0.974119	-0.536436	-0.640571	-1.0627	-0.600956	0.313645	-0.576242
174	chr1-10937011-10937918	49	chr1-10937011-10937918	908	0		0		intergenic	0	9951	0	-0.573388	-0.0470687	1.35983	0.959599	2.30777	1.6596	0.659269	-0.530614	-0.685953	-1.03167	-0.974119	-0.536436	-0.640571	-1.0627	-0.600956	0.313645	-0.576242
175	chr1-10962306-10963110	49	chr1-10962306-10963110	805	0	ENSG00000175262	1	C1orf127	intron	0	1090	0	-0.573388	-0.0470687	1.35983	0.959599	2.30777	1.6596	0.659269	-0.530614	-0.685953	-1.03167	-0.974119	-0.536436	-0.640571	-1.0627	-0.600956	0.313645	-0.576242
176	chr1-10967954-10968852	49	chr1-10967954-10968852	899	0	ENSG00000175262	1	C1orf127	intron	0	3752	0	-0.573388	-0.0470687	1.35983	0.959599	2.30777	1.6596	0.659269	-0.530614	-0.685953	-1.03167	-0.974119	-0.536436	-0.640571	-1.0627	-0.600956	0.313645	-0.576242
177	chr1-11107274-11107958	49	chr1-11107274-11107958	685	1	ENSG00000198793	1	MTOR	exon	0	6670	0	-0.573388	-0.0470687	1.35983	0.959599	2.30777	1.6596	0.659269	-0.530614	-0.685953	-1.03167	-0.974119	-0.536436	-0.640571	-1.0627	-0.600956	0.313645	-0.576242
178	chr1-11298535-11299701	49	chr1-11298535-11299701	1167	0		0		intergenic	0	24600	0	-0.573388	-0.0470687	1.35983	0.959599	2.30777	1.6596	0.659269	-0.530614	-0.685953	-1.03167	-0.974119	-0.536436	-0.640571	-1.0627	-0.600956	0.313645	-0.576242
179	chr1-11319945-11320480	49	chr1-11319945-11320480	536	0		0		intergenic	0	46010	0	-0.573388	-0.0470687	1.35983	0.959599	2.30777	1.6596	0.659269	-0.530614	-0.685953	-1.03167	-0.974119	-0.536436	-0.640571	-1.0627	-0.600956	0.313645	-0.576242
180	chr1-11321705-11322467	49	chr1-11321705-11322467	763	0		0		intergenic	0	47770	0	-0.573388	-0.0470687	1.35983	0.959599	2.30777	1.6596	0.659269	-0.530614	-0.685953	-1.03167	-0.974119	-0.536436	-0.640571	-1.0627	-0.600956	0.313645	-0.576242
181	chr1-11324177-11325020	49	chr1-11324177-11325020	844	0		0		intergenic	0	50242	0	-0.573388	-0.0470687	1.35983	0.959599	2.30777	1.6596	0.659269	-0.530614	-0.685953	-1.03167	-0.974119	-0.536436	-0.640571	-1.0627	-0.600956	0.313645	-0.576242
182	chr1-11335865-11336623	49	chr1-11335865-11336623	759	0		0		intergenic	0	61930	0	-0.573388	-0.0470687	1.35983	0.959599	2.30777	1.6596	0.659269	-0.530614	-0.685953	-1.03167	-0.974119	-0.536436	-0.640571	-1.0627	-0.600956	0.313645	-0.576242
183	chr1-11337418-11338856	49	chr1-11337418-11338856	1439	0		0		intergenic	0	63483	0	-0.573388	-0.0470687	1.35983	0.959599	2.30777	1.6596	0.659269	-0.530614	-0.685953	-1.03167	-0.974119	-0.536436	-0.640571	-1.0627	-0.600956	0.313645	-0.576242
184	chr1-11339263-11340318	49	chr1-11339263-11340318	1056	0		0		intergenic	0	65328	0	-0.573388	-0.0470687	1.35983	0.959599	2.30777	1.6596	0.659269	-0.530614	-0.685953	-1.03167	-0.974119	-0.536436	-0.640571	-1.0627	-0.600956	0.313645	-0.576242
185	chr1-11345793-11346583	49	chr1-11345793-11346583	791	0		0		intergenic	0	71858	0	-0.573388	-0.0470687	1.35983	0.959599	2.30777	1.6596	0.659269	-0.530614	-0.685953	-1.03167	-0.974119	-0.536436	-0.640571	-1.0627	-0.600956	0.313645	-0.576242
186	chr1-11362056-11363266	49	chr1-11362056-11363266	1211	0		0		intergenic	0	88121	0	-0.573388	-0.0470687	1.35983	0.959599	2.30777	1.6596	0.659269	-0.530614	-0.685953	-1.03167	-0.974119	-0.536436	-0.640571	-1.0627	-0.600956	0.313645	-0.576242
187	chr1-11374193-11375000	49	chr1-11374193-11375000	808	0		0		intergenic	0	100258	0	-0.573388	-0.0470687	1.35983	0.959599	2.30777	1.6596	0.659269	-0.530614	-0.685953	-1.03167	-0.974119	-0.536436	-0.640571	-1.0627	-0.600956	0.313645	-0.576242
188	chr1-11375355-11376120	49	chr1-11375355-11376120	766	0		0		intergenic	0	101420	0	-0.573388	-0.0470687	1.35983	0.959599	2.30777	1.6596	0.659269	-0.530614	-0.685953	-1.03167	-0.974119	-0.536436	-0.640571	-1.0627	-0.600956	0.313645	-0.576242
189	chr1-11376659-11377509	49	chr1-11376659-11377509	851	0		0		intergenic	0	101656	0	-0.573388	-0.0470687	1.35983	0.959599	2.30777	1.6596	0.659269	-0.530614	-0.685953	-1.03167	-0.974119	-0.536436	-0.640571	-1.0627	-0.600956	0.313645	-0.576242
190	chr1-11379444-11380202	49	chr1-11379444-11380202	759	0		0		intergenic	0	98963	0	-0.573388	-0.0470687	1.35983	0.959599	2.30777	1.6596	0.659269	-0.530614	-0.685953	-1.03167	-0.974119	-0.536436	-0.640571	-1.0627	-0.600956	0.313645	-0.576242
191	chr1-11394509-11395823	49	chr1-11394509-11395823	1315	0		0		intergenic	0	83342	0	-0.573388	-0.0470687	1.35983	0.959599	2.30777	1.6596	0.659269	-0.530614	-0.685953	-1.03167	-0.974119	-0.536436	-0.640571	-1.0627	-0.600956	0.313645	-0.576242
192	chr1-11441270-11441821	49	chr1-11441270-11441821	552	0		0		intergenic	0	37344	0	-0.573388	-0.0470687	1.35983	0.959599	2.30777	1.6596	0.659269	-0.530614	-0.685953	-1.03167	-0.974119	-0.536436	-0.640571	-1.0627	-0.600956	0.313645	-0.576242
193	chr1-11458595-11459738	49	chr1-11458595-11459738	1144	0		0		intergenic	0	19427	0	-0.573388	-0.0470687	1.35983	0.959599	2.30777	1.6596	0.659269	-0.530614	-0.685953	-1.03167	-0.974119	-0.536436	-0.640571	-1.0627	-0.600956	0.313645	-0.576242
194	chr1-11473454-11473958	49	chr1-11473454-11473958	505	0		0		intergenic	0	5207	0	-0.573388	-0.0470687	1.35983	0.959599	2.30777	1.6596	0.659269	-0.530614	-0.685953	-1.03167	-0.974119	-0.536436	-0.640571	-1.0627	-0.600956	0.313645	-0.576242
195	chr1-11494268-11495018	49	chr1-11494268-11495018	751	0	ENSG00000204624	1	DISP3	intron	0	15029	0	-0.573388	-0.0470687	1.35983	0.959599	2.30777	1.6596	0.659269	-0.530614	-0.685953	-1.03167	-0.974119	-0.536436	-0.640571	-1.0627	-0.600956	0.313645	-0.576242
196	chr1-11635628-11636363	49	chr1-11635628-11636363	736	0		0		intergenic	0	14349	0	-0.573388	-0.0470687	1.35983	0.959599	2.30777	1.6596	0.659269	-0.530614	-0.685953	-1.03167	-0.974119	-0.536436	-0.640571	-1.0627	-0.600956	0.313645	-0.576242
197	chr1-106978272-106978943	16	chr1-106978272-106978943	672	0		0		intergenic	0	77735	0	-0.443268	0.450714	-0.541753	-0.658679	-0.638932	-0.68937	-0.52695	-0.370548	1.16785	0.213325	3.48464	0.231341	0.224906	-0.512603	-0.506672	-0.505968	-0.378032
198	chr1-107009068-107010127	16	chr1-107009068-107010127	1060	0		0		intergenic	0	46551	0	-0.443268	0.450714	-0.541753	-0.658679	-0.638932	-0.68937	-0.52695	-0.370548	1.16785	0.213325	3.48464	0.231341	0.224906	-0.512603	-0.506672	-0.505968	-0.378032
199	chr1-107158472-107159468	16	chr1-107158472-107159468	997	0	ENSG00000162631	1	NTNG1	intron	0	9877	0	-0.443268	0.450714	-0.541753	-0.658679	-0.638932	-0.68937	-0.52695	-0.370548	1.16785	0.213325	3.48464	0.231341	0.224906	-0.512603	-0.506672	-0.505968	-0.378032
200	chr1-107581049-107582086	20	chr1-107581049-107582086	1038	0	ENSG00000134215	1	VAV3	intron	0	91562	0	-0.588188	-0.307423	1.22198	-0.327284	2.20481	2.74409	-0.403147	-0.430971	-0.40812	-0.746627	-0.505588	-0.0913884	-0.472953	-0.733419	-0.265794	-0.403438	-0.486541
201	chr1-107692478-107693363	20	chr1-107692478-107693363	886	0	ENSG00000134215	1	VAV3	intron	0	3949	0	-0.588188	-0.307423	1.22198	-0.327284	2.20481	2.74409	-0.403147	-0.430971	-0.40812	-0.746627	-0.505588	-0.0913884	-0.472953	-0.733419	-0.265794	-0.403438	-0.486541
202	chr1-107867208-107868454	20	chr1-107867208-107868454	1247	0	ENSG00000134215	1	VAV3	intron	0	46311	0	-0.588188	-0.307423	1.22198	-0.327284	2.20481	2.74409	-0.403147	-0.430971	-0.40812	-0.746627	-0.505588	-0.0913884	-0.472953	-0.733419	-0.265794	-0.403438	-0.486541
203	chr1-107934753-107935516	20	chr1-107934753-107935516	764	0	ENSG00000134215	1	VAV3	intron	0	27983	0	-0.588188	-0.307423	1.22198	-0.327284	2.20481	2.74409	-0.403147	-0.430971	-0.40812	-0.746627	-0.505588	-0.0913884	-0.472953	-0.733419	-0.265794	-0.403438	-0.486541
204	chr1-108106607-108107230	20	chr1-108106607-108107230	624	0		0		intergenic	0	85587	0	-0.588188	-0.307423	1.22198	-0.327284	2.20481	2.74409	-0.403147	-0.430971	-0.40812	-0.746627	-0.505588	-0.0913884	-0.472953	-0.733419	-0.265794	-0.403438	-0.486541
205	chr1-108034374-108035650	19	chr1-108034374-108035650	1277	0		0		intergenic	0	69229	0	-0.667639	0.207228	-0.68447	-0.85339	-0.620712	-0.780728	-0.705801	-0.243828	1.38544	-0.125949	3.0793	0.331578	1.15918	0.132461	-0.565123	-0.576147	-0.4714
206	chr1-108041021-108042051	19	chr1-108041021-108042051	1031	0		0		intergenic	0	75876	0	-0.667639	0.207228	-0.68447	-0.85339	-0.620712	-0.780728	-0.705801	-0.243828	1.38544	-0.125949	3.0793	0.331578	1.15918	0.132461	-0.565123	-0.576147	-0.4714
207	chr1-108059327-108060443	19	chr1-108059327-108060443	1117	0		0		intergenic	0	94182	0	-0.667639	0.207228	-0.68447	-0.85339	-0.620712	-0.780728	-0.705801	-0.243828	1.38544	-0.125949	3.0793	0.331578	1.15918	0.132461	-0.565123	-0.576147	-0.4714
208	chr1-108117835-108118826	19	chr1-108117835-108118826	992	0		0		intergenic	0	73991	0	-0.667639	0.207228	-0.68447	-0.85339	-0.620712	-0.780728	-0.705801	-0.243828	1.38544	-0.125949	3.0793	0.331578	1.15918	0.132461	-0.565123	-0.576147	-0.4714
209	chr1-108551387-108551784	22	chr1-108551387-108551784	398	0		0		intergenic	0	8304	0	-0.0418025	-0.274671	-0.264131	-0.278635	-0.257099	-0.271831	-0.274232	-0.268819	-0.26477	-0.268796	-0.261577	-0.268462	-0.269836	3.99418	-0.273782	-0.223879	-0.231854
210	chr1-108556479-108556783	22	chr1-108556479-108556783	305	0		0		intergenic	0	3305	0	-0.0418025	-0.274671	-0.264131	-0.278635	-0.257099	-0.271831	-0.274232	-0.268819	-0.26477	-0.268796	-0.261577	-0.268462	-0.269836	3.99418	-0.273782	-0.223879	-0.231854
211	chr1-108646449-108647176	22	chr1-108646449-108647176	728	0		0		intergenic	0	4268	0	-0.0418025	-0.274671	-0.264131	-0.278635	-0.257099	-0.271831	-0.274232	-0.268819	-0.26477	-0.268796	-0.261577	-0.268462	-0.269836	3.99418	-0.273782	-0.223879	-0.231854
212	chr1-108590401-108591397	23	chr1-108590401-108591397	997	0	ENSG00000162636	1	FAM102B	intron	0	30311	0	-0.568155	0.244142	-1.06389	-0.977524	-1.23469	-1.18279	-0.594642	-0.262711	1.07538	0.566216	2.19782	1.40833	1.32108	-0.599286	0.403848	-0.789082	0.0559438
213	chr1-108594950-108596065	23	chr1-108594950-108596065	1116	0	ENSG00000162636	1	FAM102B	intron	0	28599	0	-0.568155	0.244142	-1.06389	-0.977524	-1.23469	-1.18279	-0.594642	-0.262711	1.07538	0.566216	2.19782	1.40833	1.32108	-0.599286	0.403848	-0.789082	0.0559438
214	chr1-108609235-108610392	23	chr1-108609235-108610392	1158	0	ENSG00000162636	1	FAM102B	intron	0	14272	0	-0.568155	0.244142	-1.06389	-0.977524	-1.23469	-1.18279	-0.594642	-0.262711	1.07538	0.566216	2.19782	1.40833	1.32108	-0.599286	0.403848	-0.789082	0.0559438
215	chr1-108660798-108661769	23	chr1-108660798-108661769	972	1	ENSG00000162639	1	HENMT1	exon	1	0	0	-0.568155	0.244142	-1.06389	-0.977524	-1.23469	-1.18279	-0.594642	-0.262711	1.07538	0.566216	2.19782	1.40833	1.32108	-0.599286	0.403848	-0.789082	0.0559438
216	chr1-108814343-108815094	23	chr1-108814343-108815094	752	0		0		intergenic	0	2359	0	-0.568155	0.244142	-1.06389	-0.977524	-1.23469	-1.18279	-0.594642	-0.262711	1.07538	0.566216	2.19782	1.40833	1.32108	-0.599286	0.403848	-0.789082	0.0559438
217	chr1-108816066-108817360	23	chr1-108816066-108817360	1295	1	ENSG00000162641	1	AKNAD1	exon	0	93	0	-0.568155	0.244142	-1.06389	-0.977524	-1.23469	-1.18279	-0.594642	-0.262711	1.07538	0.566216	2.19782	1.40833	1.32108	-0.599286	0.403848	-0.789082	0.0559438
218	chr1-108827883-108828840	23	chr1-108827883-108828840	958	0	ENSG00000162641	1	AKNAD1	intron	0	1893	0	-0.568155	0.244142	-1.06389	-0.977524	-1.23469	-1.18279	-0.594642	-0.262711	1.07538	0.566216	2.19782	1.40833	1.32108	-0.599286	0.403848	-0.789082	0.0559438
219	chr1-108830291-108831558	23	chr1-108830291-108831558	1268	1	ENSG00000162641	1	AKNAD1	exon	1	0	0	-0.568155	0.244142	-1.06389	-0.977524	-1.23469	-1.18279	-0.594642	-0.262711	1.07538	0.566216	2.19782	1.40833	1.32108	-0.599286	0.403848	-0.789082	0.0559438
220	chr1-109186113-109187143	23	chr1-109186113-109187143	1031	1	ENSG00000116299	1	KIAA1324	exon	1	0	0	-0.568155	0.244142	-1.06389	-0.977524	-1.23469	-1.18279	-0.594642	-0.262711	1.07538	0.566216	2.19782	1.40833	1.32108	-0.599286	0.403848	-0.789082	0.0559438
221	chr1-109241808-109242846	23	chr1-109241808-109242846	1039	0		0		intergenic	0	5576	0	-0.568155	0.244142	-1.06389	-0.977524	-1.23469	-1.18279	-0.594642	-0.262711	1.07538	0.566216	2.19782	1.40833	1.32108	-0.599286	0.403848	-0.789082	0.0559438
222	chr1-109088975-109089537	28	chr1-109088975-109089537	563	0	ENSG00000215717	0	TMEM167B	promoter	1	265	0	3.88186	-0.310169	-0.308835	-0.41487	-0.405309	-0.352121	-0.402421	-0.513452	-0.335344	0.306566	-0.200343	-0.481233	-0.00100937	-0.0984722	-0.430418	-0.265842	0.331414
223	chr1-109207657-109208042	28	chr1-109207657-109208042	386	0		0		intergenic	0	5875	0	3.88186	-0.310169	-0.308835	-0.41487	-0.405309	-0.352121	-0.402421	-0.513452	-0.335344	0.306566	-0.200343	-0.481233	-0.00100937	-0.0984722	-0.430418	-0.265842	0.331414
224	chr1-109285019-109285650	28	chr1-109285019-109285650	632	0	ENSG00000134222	0	PSRC1	promoter	1	1832	0	3.88186	-0.310169	-0.308835	-0.41487	-0.405309	-0.352121	-0.402421	-0.513452	-0.335344	0.306566	-0.200343	-0.481233	-0.00100937	-0.0984722	-0.430418	-0.265842	0.331414
225	chr1-109148454-109149602	26	chr1-109148454-109149602	1149	0	ENSG00000116299	1	KIAA1324	intron	0	12003	0	-0.711552	-0.0926189	1.41286	1.35338	1.94156	1.76388	0.498096	0.289109	-0.45019	-0.864161	-0.824037	-0.438841	-0.288888	-0.940376	-1.19005	-0.431993	-1.02617
226	chr1-109176004-109176584	26	chr1-109176004-109176584	581	0	ENSG00000116299	1	KIAA1324	intron	0	9964	0	-0.711552	-0.0926189	1.41286	1.35338	1.94156	1.76388	0.498096	0.289109	-0.45019	-0.864161	-0.824037	-0.438841	-0.288888	-0.940376	-1.19005	-0.431993	-1.02617
227	chr1-109180672-109182024	26	chr1-109180672-109182024	1353	0	ENSG00000116299	1	KIAA1324	intron	0	4524	0	-0.711552	-0.0926189	1.41286	1.35338	1.94156	1.76388	0.498096	0.289109	-0.45019	-0.864161	-0.824037	-0.438841	-0.288888	-0.940376	-1.19005	-0.431993	-1.02617
228	chr1-109190134-109190579	26	chr1-109190134-109190579	446	0	ENSG00000116299	1	KIAA1324	promoter	1	792	0	-0.711552	-0.0926189	1.41286	1.35338	1.94156	1.76388	0.498096	0.289109	-0.45019	-0.864161	-0.824037	-0.438841	-0.288888	-0.940376	-1.19005	-0.431993	-1.02617
229	chr1-109193667-109194651	26	chr1-109193667-109194651	985	1	ENSG00000116299	1	KIAA1324	exon	0	2294	0	-0.711552	-0.0926189	1.41286	1.35338	1.94156	1.76388	0.498096	0.289109	-0.45019	-0.864161	-0.824037	-0.438841	-0.288888	-0.940376	-1.19005	-0.431993	-1.02617
230	chr1-109206060-109206933	26	chr1-109206060-109206933	874	1	ENSG00000116299	1	KIAA1324	exon	0	5868	0	-0.711552	-0.0926189	1.41286	1.35338	1.94156	1.76388	0.498096	0.289109	-0.45019	-0.864161	-0.824037	-0.438841	-0.288888	-0.940376	-1.19005	-0.431993	-1.02617
231	chr1-109277212-109277900	26	chr1-109277212-109277900	689	0		0		intergenic	0	3778	0	-0.711552	-0.0926189	1.41286	1.35338	1.94156	1.76388	0.498096	0.289109	-0.45019	-0.864161	-0.824037	-0.438841	-0.288888	-0.940376	-1.19005	-0.431993	-1.02617
232	chr1-109342183-109343575	26	chr1-109342183-109343575	1393	0	ENSG00000134243	1	SORT1	intron	0	5880	0	-0.711552	-0.0926189	1.41286	1.35338	1.94156	1.76388	0.498096	0.289109	-0.45019	-0.864161	-0.824037	-0.438841	-0.288888	-0.940376	-1.19005	-0.431993	-1.02617
233	chr1-109464667-109465237	26	chr1-109464667-109465237	571	0	ENSG00000143028	0	SYPL2	promoter	1	1390	0	-0.711552	-0.0926189	1.41286	1.35338	1.94156	1.76388	0.498096	0.289109	-0.45019	-0.864161	-0.824037	-0.438841	-0.288888	-0.940376	-1.19005	-0.431993	-1.02617
234	chr1-109478734-109479154	26	chr1-109478734-109479154	421	0	ENSG00000143028	1	SYPL2	intron	0	3491	0	-0.711552	-0.0926189	1.41286	1.35338	1.94156	1.76388	0.498096	0.289109	-0.45019	-0.864161	-0.824037	-0.438841	-0.288888	-0.940376	-1.19005	-0.431993	-1.02617
235	chr1-109497455-109498742	26	chr1-109497455-109498742	1288	1	ENSG00000174151	1	CYB561D1	exon	0	3339	0	-0.711552	-0.0926189	1.41286	1.35338	1.94156	1.76388	0.498096	0.289109	-0.45019	-0.864161	-0.824037	-0.438841	-0.288888	-0.940376	-1.19005	-0.431993	-1.02617
236	chr1-109520714-109522017	26	chr1-109520714-109522017	1304	0		0		intergenic	0	10975	0	-0.711552	-0.0926189	1.41286	1.35338	1.94156	1.76388	0.498096	0.289109	-0.45019	-0.864161	-0.824037	-0.438841	-0.288888	-0.940376	-1.19005	-0.431993	-1.02617
237	chr1-109539393-109540160	26	chr1-109539393-109540160	768	1	ENSG00000156097	1	GPR61	exon	1	0	0	-0.711552	-0.0926189	1.41286	1.35338	1.94156	1.76388	0.498096	0.289109	-0.45019	-0.864161	-0.824037	-0.438841	-0.288888	-0.940376	-1.19005	-0.431993	-1.02617
238	chr1-109609345-109610282	26	chr1-109609345-109610282	938	1	ENSG00000134183	1	GNAT2	exon	0	2774	0	-0.711552	-0.0926189	1.41286	1.35338	1.94156	1.76388	0.498096	0.289109	-0.45019	-0.864161	-0.824037	-0.438841	-0.288888	-0.940376	-1.19005	-0.431993	-1.02617
239	chr1-109623469-109624444	26	chr1-109623469-109624444	976	1	ENSG00000116337	1	AMPD2	exon	1	0	0	-0.711552	-0.0926189	1.41286	1.35338	1.94156	1.76388	0.498096	0.289109	-0.45019	-0.864161	-0.824037	-0.438841	-0.288888	-0.940376	-1.19005	-0.431993	-1.02617
240	chr1-109631994-109633183	26	chr1-109631994-109633183	1190	1	ENSG00000116337	1	AMPD2	exon	0	1355	0	-0.711552	-0.0926189	1.41286	1.35338	1.94156	1.76388	0.498096	0.289109	-0.45019	-0.864161	-0.824037	-0.438841	-0.288888	-0.940376	-1.19005	-0.431993	-1.02617
241	chr1-109659784-109660378	26	chr1-109659784-109660378	595	1	ENSG00000168765	1	GSTM4	exon	0	969	0	-0.711552	-0.0926189	1.41286	1.35338	1.94156	1.76388	0.498096	0.289109	-0.45019	-0.864161	-0.824037	-0.438841	-0.288888	-0.940376	-1.19005	-0.431993	-1.02617
242	chr1-109262832-109264228	30	chr1-109262832-109264228	1397	1	ENSG00000143126	1	CELSR2	exon	1	1040	0	-0.587204	-0.0688325	-1.12255	-0.790209	-1.33753	-1.22348	-0.272636	-0.10681	0.408768	1.70254	0.773951	0.255271	-0.10414	2.306	1.26559	-0.80486	-0.293875
243	chr1-109272041-109272775	30	chr1-109272041-109272775	735	1	ENSG00000143126	1	CELSR2	exon	0	1216	0	-0.587204	-0.0688325	-1.12255	-0.790209	-1.33753	-1.22348	-0.272636	-0.10681	0.408768	1.70254	0.773951	0.255271	-0.10414	2.306	1.26559	-0.80486	-0.293875
244	chr1-109493251-109494539	30	chr1-109493251-109494539	1289	1	ENSG00000174151	1	CYB561D1	exon	1	0	0	-0.587204	-0.0688325	-1.12255	-0.790209	-1.33753	-1.22348	-0.272636	-0.10681	0.408768	1.70254	0.773951	0.255271	-0.10414	2.306	1.26559	-0.80486	-0.293875
245	chr1-109555378-109556219	30	chr1-109555378-109556219	842	0	ENSG00000065135	1	GNAI3	intron	0	6766	0	-0.587204	-0.0688325	-1.12255	-0.790209	-1.33753	-1.22348	-0.272636	-0.10681	0.408768	1.70254	0.773951	0.255271	-0.10414	2.306	1.26559	-0.80486	-0.293875
246	chr1-109615744-109616251	30	chr1-109615744-109616251	508	1	ENSG00000116337	1	AMPD2	exon	1	0	0	-0.587204	-0.0688325	-1.12255	-0.790209	-1.33753	-1.22348	-0.272636	-0.10681	0.408768	1.70254	0.773951	0.255271	-0.10414	2.306	1.26559	-0.80486	-0.293875
247	chr1-109617338-109617613	30	chr1-109617338-109617613	276	1	ENSG00000116337	1	AMPD2	exon	1	1233	0	-0.587204	-0.0688325	-1.12255	-0.790209	-1.33753	-1.22348	-0.272636	-0.10681	0.408768	1.70254	0.773951	0.255271	-0.10414	2.306	1.26559	-0.80486	-0.293875
248	chr1-109625519-109625886	30	chr1-109625519-109625886	368	1	ENSG00000116337	1	AMPD2	exon	1	0	0	-0.587204	-0.0688325	-1.12255	-0.790209	-1.33753	-1.22348	-0.272636	-0.10681	0.408768	1.70254	0.773951	0.255271	-0.10414	2.306	1.26559	-0.80486	-0.293875
249	chr1-109648724-109649927	30	chr1-109648724-109649927	1204	0		0		intergenic	0	6153	0	-0.587204	-0.0688325	-1.12255	-0.790209	-1.33753	-1.22348	-0.272636	-0.10681	0.408768	1.70254	0.773951	0.255271	-0.10414	2.306	1.26559	-0.80486	-0.293875
250	chr1-109667399-109668744	30	chr1-109667399-109668744	1346	1	ENSG00000213366	1	GSTM2	exon	1	0	0	-0.587204	-0.0688325	-1.12255	-0.790209	-1.33753	-1.22348	-0.272636	-0.10681	0.408768	1.70254	0.773951	0.255271	-0.10414	2.306	1.26559	-0.80486	-0.293875
251	chr1-109711630-109712870	30	chr1-109711630-109712870	1241	1	ENSG00000134201	1	GSTM5	exon	1	0	0	-0.587204	-0.0688325	-1.12255	-0.790209	-1.33753	-1.22348	-0.272636	-0.10681	0.408768	1.70254	0.773951	0.255271	-0.10414	2.306	1.26559	-0.80486	-0.293875
252	chr1-109762858-109763502	30	chr1-109762858-109763502	645	0	ENSG00000198758	1	EPS8L3	intron	0	401	0	-0.587204	-0.0688325	-1.12255	-0.790209	-1.33753	-1.22348	-0.272636	-0.10681	0.408768	1.70254	0.773951	0.255271	-0.10414	2.306	1.26559	-0.80486	-0.293875
253	chr1-109790639-109791102	30	chr1-109790639-109791102	464	0		0		intergenic	0	26611	0	-0.587204	-0.0688325	-1.12255	-0.790209	-1.33753	-1.22348	-0.272636	-0.10681	0.408768	1.70254	0.773951	0.255271	-0.10414	2.306	1.26559	-0.80486	-0.293875
254	chr1-109793498-109794170	30	chr1-109793498-109794170	673	0		0		intergenic	0	29470	0	-0.587204	-0.0688325	-1.12255	-0.790209	-1.33753	-1.22348	-0.272636	-0.10681	0.408768	1.70254	0.773951	0.255271	-0.10414	2.306	1.26559	-0.80486	-0.293875
255	chr1-109815952-109816799	30	chr1-109815952-109816799	848	0		0		intergenic	0	51924	0	-0.587204	-0.0688325	-1.12255	-0.790209	-1.33753	-1.22348	-0.272636	-0.10681	0.408768	1.70254	0.773951	0.255271	-0.10414	2.306	1.26559	-0.80486	-0.293875
256	chr1-109818162-109819204	30	chr1-109818162-109819204	1043	0		0		intergenic	0	54134	0	-0.587204	-0.0688325	-1.12255	-0.790209	-1.33753	-1.22348	-0.272636	-0.10681	0.408768	1.70254	0.773951	0.255271	-0.10414	2.306	1.26559	-0.80486	-0.293875
257	chr1-109822196-109822669	30	chr1-109822196-109822669	474	0		0		intergenic	0	58168	0	-0.587204	-0.0688325	-1.12255	-0.790209	-1.33753	-1.22348	-0.272636	-0.10681	0.408768	1.70254	0.773951	0.255271	-0.10414	2.306	1.26559	-0.80486	-0.293875
258	chr1-109863652-109864806	30	chr1-109863652-109864806	1155	0		0		intergenic	0	45435	0	-0.587204	-0.0688325	-1.12255	-0.790209	-1.33753	-1.22348	-0.272636	-0.10681	0.408768	1.70254	0.773951	0.255271	-0.10414	2.306	1.26559	-0.80486	-0.293875
259	chr1-109864922-109865570	30	chr1-109864922-109865570	649	0		0		intergenic	0	44671	0	-0.587204	-0.0688325	-1.12255	-0.790209	-1.33753	-1.22348	-0.272636	-0.10681	0.408768	1.70254	0.773951	0.255271	-0.10414	2.306	1.26559	-0.80486	-0.293875
260	chr1-109876965-109877890	30	chr1-109876965-109877890	926	0		0		intergenic	0	32351	0	-0.587204	-0.0688325	-1.12255	-0.790209	-1.33753	-1.22348	-0.272636	-0.10681	0.408768	1.70254	0.773951	0.255271	-0.10414	2.306	1.26559	-0.80486	-0.293875
261	chr1-109886662-109887157	30	chr1-109886662-109887157	496	0		0		intergenic	0	23084	0	-0.587204	-0.0688325	-1.12255	-0.790209	-1.33753	-1.22348	-0.272636	-0.10681	0.408768	1.70254	0.773951	0.255271	-0.10414	2.306	1.26559	-0.80486	-0.293875
262	chr1-109891874-109893119	30	chr1-109891874-109893119	1246	0		0		intergenic	0	17122	0	-0.587204	-0.0688325	-1.12255	-0.790209	-1.33753	-1.22348	-0.272636	-0.10681	0.408768	1.70254	0.773951	0.255271	-0.10414	2.306	1.26559	-0.80486	-0.293875
263	chr1-109895587-109896371	30	chr1-109895587-109896371	785	0		0		intergenic	0	13870	0	-0.587204	-0.0688325	-1.12255	-0.790209	-1.33753	-1.22348	-0.272636	-0.10681	0.408768	1.70254	0.773951	0.255271	-0.10414	2.306	1.26559	-0.80486	-0.293875
264	chr1-109906162-109906502	30	chr1-109906162-109906502	341	0		0		intergenic	0	3739	0	-0.587204	-0.0688325	-1.12255	-0.790209	-1.33753	-1.22348	-0.272636	-0.10681	0.408768	1.70254	0.773951	0.255271	-0.10414	2.306	1.26559	-0.80486	-0.293875
265	chr1-109912111-109912524	30	chr1-109912111-109912524	414	0	ENSG00000184371	1	CSF1	intron	0	1124	0	-0.587204	-0.0688325	-1.12255	-0.790209	-1.33753	-1.22348	-0.272636	-0.10681	0.408768	1.70254	0.773951	0.255271	-0.10414	2.306	1.26559	-0.80486	-0.293875
266	chr1-109927665-109929035	30	chr1-109927665-109929035	1371	1	ENSG00000184371	1	CSF1	exon	0	12007	0	-0.587204	-0.0688325	-1.12255	-0.790209	-1.33753	-1.22348	-0.272636	-0.10681	0.408768	1.70254	0.773951	0.255271	-0.10414	2.306	1.26559	-0.80486	-0.293875
267	chr1-109930933-109931527	30	chr1-109930933-109931527	595	1	ENSG00000184371	1	CSF1	exon	0	15275	0	-0.587204	-0.0688325	-1.12255	-0.790209	-1.33753	-1.22348	-0.272636	-0.10681	0.408768	1.70254	0.773951	0.255271	-0.10414	2.306	1.26559	-0.80486	-0.293875
268	chr1-109946212-109946838	30	chr1-109946212-109946838	627	0		0		intergenic	0	30554	0	-0.587204	-0.0688325	-1.12255	-0.790209	-1.33753	-1.22348	-0.272636	-0.10681	0.408768	1.70254	0.773951	0.255271	-0.10414	2.306	1.26559	-0.80486	-0.293875
269	chr1-109979216-109980023	30	chr1-109979216-109980023	808	0		0		intergenic	0	4662	0	-0.587204	-0.0688325	-1.12255	-0.790209	-1.33753	-1.22348	-0.272636	-0.10681	0.408768	1.70254	0.773951	0.255271	-0.10414	2.306	1.26559	-0.80486	-0.293875
270	chr1-110102009-110102670	30	chr1-110102009-110102670	662	0		0		intergenic	0	9797	0	-0.587204	-0.0688325	-1.12255	-0.790209	-1.33753	-1.22348	-0.272636	-0.10681	0.408768	1.70254	0.773951	0.255271	-0.10414	2.306	1.26559	-0.80486	-0.293875
271	chr1-109273252-109273645	27	chr1-109273252-109273645	394	1	ENSG00000143126	1	CELSR2	exon	0	2427	0	2.42329	0.083314	-0.923299	0.0229565	-0.76311	-0.73919	1.33246	-0.818106	-0.787335	-0.491587	-0.360032	1.04757	-0.260531	-0.747184	-0.880154	1.78875	0.0721902
272	chr1-109273862-109274168	27	chr1-109273862-109274168	307	1	ENSG00000143126	1	CELSR2	exon	0	3037	0	2.42329	0.083314	-0.923299	0.0229565	-0.76311	-0.73919	1.33246	-0.818106	-0.787335	-0.491587	-0.360032	1.04757	-0.260531	-0.747184	-0.880154	1.78875	0.0721902
273	chr1-109274377-109275107	27	chr1-109274377-109275107	731	1	ENSG00000143126	1	CELSR2	exon	0	3552	0	2.42329	0.083314	-0.923299	0.0229565	-0.76311	-0.73919	1.33246	-0.818106	-0.787335	-0.491587	-0.360032	1.04757	-0.260531	-0.747184	-0.880154	1.78875	0.0721902
274	chr1-109275149-109275432	27	chr1-109275149-109275432	284	1	ENSG00000143126	1	CELSR2	exon	0	4324	0	2.42329	0.083314	-0.923299	0.0229565	-0.76311	-0.73919	1.33246	-0.818106	-0.787335	-0.491587	-0.360032	1.04757	-0.260531	-0.747184	-0.880154	1.78875	0.0721902
275	chr1-110121009-110121726	33	chr1-110121009-110121726	718	0		0		intergenic	0	8540	0	-0.11087	-0.00809605	0.274075	1.17088	1.96645	1.30862	1.30229	-0.771725	-0.932478	-0.804017	-1.28912	-1.21342	-0.793357	-0.801273	-0.375238	-0.178277	1.25556
276	chr1-110150197-110151575	33	chr1-110150197-110151575	1379	1	ENSG00000197106	1	SLC6A17	exon	1	0	0	-0.11087	-0.00809605	0.274075	1.17088	1.96645	1.30862	1.30229	-0.771725	-0.932478	-0.804017	-1.28912	-1.21342	-0.793357	-0.801273	-0.375238	-0.178277	1.25556
277	chr1-110170856-110171846	33	chr1-110170856-110171846	991	0	ENSG00000197106	1	SLC6A17	intron	0	20369	0	-0.11087	-0.00809605	0.274075	1.17088	1.96645	1.30862	1.30229	-0.771725	-0.932478	-0.804017	-1.28912	-1.21342	-0.793357	-0.801273	-0.375238	-0.178277	1.25556
278	chr1-110176018-110176944	33	chr1-110176018-110176944	927	1	ENSG00000197106	1	SLC6A17	exon	0	15623	0	-0.11087	-0.00809605	0.274075	1.17088	1.96645	1.30862	1.30229	-0.771725	-0.932478	-0.804017	-1.28912	-1.21342	-0.793357	-0.801273	-0.375238	-0.178277	1.25556
279	chr1-110212034-110212717	33	chr1-110212034-110212717	684	1	ENSG00000116396	1	KCNC4	exon	1	0	0	-0.11087	-0.00809605	0.274075	1.17088	1.96645	1.30862	1.30229	-0.771725	-0.932478	-0.804017	-1.28912	-1.21342	-0.793357	-0.801273	-0.375238	-0.178277	1.25556
280	chr1-110214926-110216209	33	chr1-110214926-110216209	1284	0	ENSG00000116396	1	KCNC4	intron	0	2777	0	-0.11087	-0.00809605	0.274075	1.17088	1.96645	1.30862	1.30229	-0.771725	-0.932478	-0.804017	-1.28912	-1.21342	-0.793357	-0.801273	-0.375238	-0.178277	1.25556
281	chr1-110276598-110277367	33	chr1-110276598-110277367	770	0	ENSG00000116396	1	KCNC4	intron	0	52767	0	-0.11087	-0.00809605	0.274075	1.17088	1.96645	1.30862	1.30229	-0.771725	-0.932478	-0.804017	-1.28912	-1.21342	-0.793357	-0.801273	-0.375238	-0.178277	1.25556
282	chr1-110281557-110282700	33	chr1-110281557-110282700	1144	1	ENSG00000116396	1	KCNC4	exon	0	55805	0	-0.11087	-0.00809605	0.274075	1.17088	1.96645	1.30862	1.30229	-0.771725	-0.932478	-0.804017	-1.28912	-1.21342	-0.793357	-0.801273	-0.375238	-0.178277	1.25556
283	chr1-110433615-110434254	33	chr1-110433615-110434254	640	0		0		intergenic	0	16945	0	-0.11087	-0.00809605	0.274075	1.17088	1.96645	1.30862	1.30229	-0.771725	-0.932478	-0.804017	-1.28912	-1.21342	-0.793357	-0.801273	-0.375238	-0.178277	1.25556
284	chr1-110434792-110435421	33	chr1-110434792-110435421	630	0		0		intergenic	0	15778	0	-0.11087	-0.00809605	0.274075	1.17088	1.96645	1.30862	1.30229	-0.771725	-0.932478	-0.804017	-1.28912	-1.21342	-0.793357	-0.801273	-0.375238	-0.178277	1.25556
285	chr1-110255335-110255794	32	chr1-110255335-110255794	460	0	ENSG00000116396	1	KCNC4	intron	0	31504	0	0.0108059	-0.449224	-0.475612	-0.428227	-0.409162	-0.422574	-0.335231	-0.479172	-0.473261	1.0543	-0.411778	-0.455982	-0.364736	0.113866	3.71553	-0.190702	0.00116367
286	chr1-110256341-110256991	32	chr1-110256341-110256991	651	0	ENSG00000116396	1	KCNC4	intron	0	32510	0	0.0108059	-0.449224	-0.475612	-0.428227	-0.409162	-0.422574	-0.335231	-0.479172	-0.473261	1.0543	-0.411778	-0.455982	-0.364736	0.113866	3.71553	-0.190702	0.00116367
287	chr1-110262753-110263733	32	chr1-110262753-110263733	981	0	ENSG00000116396	1	KCNC4	intron	0	38922	0	0.0108059	-0.449224	-0.475612	-0.428227	-0.409162	-0.422574	-0.335231	-0.479172	-0.473261	1.0543	-0.411778	-0.455982	-0.364736	0.113866	3.71553	-0.190702	0.00116367
288	chr1-110264133-110264937	32	chr1-110264133-110264937	805	0	ENSG00000116396	1	KCNC4	intron	0	40302	0	0.0108059	-0.449224	-0.475612	-0.428227	-0.409162	-0.422574	-0.335231	-0.479172	-0.473261	1.0543	-0.411778	-0.455982	-0.364736	0.113866	3.71553	-0.190702	0.00116367
289	chr1-110774012-110774770	35	chr1-110774012-110774770	759	0		0		intergenic	0	98383	0	-0.230217	-0.452434	-0.5157	-0.390717	-0.561784	-0.468367	-0.424984	-0.338644	-0.267181	0.518544	-0.336033	-0.358147	-0.333329	3.67022	1.05458	-0.453415	-0.112396
290	chr1-110872695-110873258	35	chr1-110872695-110873258	564	1	ENSG00000143119	1	CD53	exon	1	0	0	-0.230217	-0.452434	-0.5157	-0.390717	-0.561784	-0.468367	-0.424984	-0.338644	-0.267181	0.518544	-0.336033	-0.358147	-0.333329	3.67022	1.05458	-0.453415	-0.112396
291	chr1-110875383-110875640	35	chr1-110875383-110875640	258	0	ENSG00000143119	1	CD53	intron	0	2199	0	-0.230217	-0.452434	-0.5157	-0.390717	-0.561784	-0.468367	-0.424984	-0.338644	-0.267181	0.518544	-0.336033	-0.358147	-0.333329	3.67022	1.05458	-0.453415	-0.112396
292	chr1-110879984-110880302	35	chr1-110879984-110880302	319	1	ENSG00000143119	1	CD53	exon	1	0	0	-0.230217	-0.452434	-0.5157	-0.390717	-0.561784	-0.468367	-0.424984	-0.338644	-0.267181	0.518544	-0.336033	-0.358147	-0.333329	3.67022	1.05458	-0.453415	-0.112396
293	chr1-111127999-111128593	35	chr1-111127999-111128593	595	1	ENSG00000156171	1	DRAM2	exon	1	0	0	-0.230217	-0.452434	-0.5157	-0.390717	-0.561784	-0.468367	-0.424984	-0.338644	-0.267181	0.518544	-0.336033	-0.358147	-0.333329	3.67022	1.05458	-0.453415	-0.112396
294	chr1-111192412-111193488	35	chr1-111192412-111193488	1077	0	ENSG00000162777	1	DENND2D	intron	0	3083	0	-0.230217	-0.452434	-0.5157	-0.390717	-0.561784	-0.468367	-0.424984	-0.338644	-0.267181	0.518544	-0.336033	-0.358147	-0.333329	3.67022	1.05458	-0.453415	-0.112396
295	chr1-111200060-111200478	35	chr1-111200060-111200478	419	1	ENSG00000064886	1	CHI3L2	exon	1	0	0	-0.230217	-0.452434	-0.5157	-0.390717	-0.561784	-0.468367	-0.424984	-0.338644	-0.267181	0.518544	-0.336033	-0.358147	-0.333329	3.67022	1.05458	-0.453415	-0.112396
296	chr1-111215817-111216605	35	chr1-111215817-111216605	789	0	ENSG00000064886	1	CHI3L2	intron	0	10410	0	-0.230217	-0.452434	-0.5157	-0.390717	-0.561784	-0.468367	-0.424984	-0.338644	-0.267181	0.518544	-0.336033	-0.358147	-0.333329	3.67022	1.05458	-0.453415	-0.112396
297	chr1-111221432-111222039	35	chr1-111221432-111222039	608	0	ENSG00000064886	1	CHI3L2	intron	0	4976	0	-0.230217	-0.452434	-0.5157	-0.390717	-0.561784	-0.468367	-0.424984	-0.338644	-0.267181	0.518544	-0.336033	-0.358147	-0.333329	3.67022	1.05458	-0.453415	-0.112396
298	chr1-111406041-111406766	35	chr1-111406041-111406766	726	0		0		intergenic	0	9912	0	-0.230217	-0.452434	-0.5157	-0.390717	-0.561784	-0.468367	-0.424984	-0.338644	-0.267181	0.518544	-0.336033	-0.358147	-0.333329	3.67022	1.05458	-0.453415	-0.112396
299	chr1-111470914-111471515	35	chr1-111470914-111471515	602	0		0		intergenic	0	2276	0	-0.230217	-0.452434	-0.5157	-0.390717	-0.561784	-0.468367	-0.424984	-0.338644	-0.267181	0.518544	-0.336033	-0.358147	-0.333329	3.67022	1.05458	-0.453415	-0.112396
300	chr1-111473692-111474857	35	chr1-111473692-111474857	1166	1	ENSG00000143110	1	C1orf162	exon	1	0	0	-0.230217	-0.452434	-0.5157	-0.390717	-0.561784	-0.468367	-0.424984	-0.338644	-0.267181	0.518544	-0.336033	-0.358147	-0.333329	3.67022	1.05458	-0.453415	-0.112396
301	chr1-111505799-111506024	35	chr1-111505799-111506024	226	0	ENSG00000121933	1	TMIGD3	intron	0	2038	0	-0.230217	-0.452434	-0.5157	-0.390717	-0.561784	-0.468367	-0.424984	-0.338644	-0.267181	0.518544	-0.336033	-0.358147	-0.333329	3.67022	1.05458	-0.453415	-0.112396
302	chr1-111507343-111508732	35	chr1-111507343-111508732	1390	0	ENSG00000121933	1	TMIGD3	intron	0	3582	0	-0.230217	-0.452434	-0.5157	-0.390717	-0.561784	-0.468367	-0.424984	-0.338644	-0.267181	0.518544	-0.336033	-0.358147	-0.333329	3.67022	1.05458	-0.453415	-0.112396
303	chr1-111616357-111616589	35	chr1-111616357-111616589	233	0	ENSG00000116473	1	RAP1A	intron	0	3187	0	-0.230217	-0.452434	-0.5157	-0.390717	-0.561784	-0.468367	-0.424984	-0.338644	-0.267181	0.518544	-0.336033	-0.358147	-0.333329	3.67022	1.05458	-0.453415	-0.112396
304	chr1-111733060-111734225	35	chr1-111733060-111734225	1166	0	ENSG00000197852	1	FAM212B	intron	0	5027	0	-0.230217	-0.452434	-0.5157	-0.390717	-0.561784	-0.468367	-0.424984	-0.338644	-0.267181	0.518544	-0.336033	-0.358147	-0.333329	3.67022	1.05458	-0.453415	-0.112396
305	chr1-11109125-11109749	40	chr1-11109125-11109749	625	1	ENSG00000198793	1	MTOR	exon	0	4879	0	-0.146313	-0.216516	-0.273341	-0.284032	-0.278861	-0.267654	-0.27799	-0.282566	-0.272583	-0.269615	-0.269143	-0.225785	-0.236308	-0.260236	-0.17588	-0.260316	3.99714
306	chr1-11186665-11187557	40	chr1-11186665-11187557	893	0	ENSG00000171819	1	ANGPTL7	promoter	1	1783	0	-0.146313	-0.216516	-0.273341	-0.284032	-0.278861	-0.267654	-0.27799	-0.282566	-0.272583	-0.269615	-0.269143	-0.225785	-0.236308	-0.260236	-0.17588	-0.260316	3.99714
307	chr1-11187957-11188637	40	chr1-11187957-11188637	681	0	ENSG00000171819	1	ANGPTL7	promoter	1	703	0	-0.146313	-0.216516	-0.273341	-0.284032	-0.278861	-0.267654	-0.27799	-0.282566	-0.272583	-0.269615	-0.269143	-0.225785	-0.236308	-0.260236	-0.17588	-0.260316	3.99714
308	chr1-111122459-111123372	36	chr1-111122459-111123372	914	1	ENSG00000156171	1	DRAM2	exon	1	1858	0	-0.476243	-0.238318	1.11908	0.927972	2.03999	2.13871	0.193525	0.0973452	0.211851	-1.08732	-1.03646	-1.02777	-1.05573	0.115733	-0.625721	-0.421896	-0.874732
309	chr1-111124005-111125244	36	chr1-111124005-111125244	1240	1	ENSG00000156171	1	DRAM2	exon	0	2782	0	-0.476243	-0.238318	1.11908	0.927972	2.03999	2.13871	0.193525	0.0973452	0.211851	-1.08732	-1.03646	-1.02777	-1.05573	0.115733	-0.625721	-0.421896	-0.874732
310	chr1-111149220-111150163	36	chr1-111149220-111150163	944	0	ENSG00000134255	1	CEPT1	intron	0	1542	0	-0.476243	-0.238318	1.11908	0.927972	2.03999	2.13871	0.193525	0.0973452	0.211851	-1.08732	-1.03646	-1.02777	-1.05573	0.115733	-0.625721	-0.421896	-0.874732
311	chr1-111156057-111157093	36	chr1-111156057-111157093	1037	0	ENSG00000134255	1	CEPT1	intron	0	8379	0	-0.476243	-0.238318	1.11908	0.927972	2.03999	2.13871	0.193525	0.0973452	0.211851	-1.08732	-1.03646	-1.02777	-1.05573	0.115733	-0.625721	-0.421896	-0.874732
312	chr1-111161573-111162886	36	chr1-111161573-111162886	1314	0	ENSG00000134255	1	CEPT1	intron	0	10251	0	-0.476243	-0.238318	1.11908	0.927972	2.03999	2.13871	0.193525	0.0973452	0.211851	-1.08732	-1.03646	-1.02777	-1.05573	0.115733	-0.625721	-0.421896	-0.874732
313	chr1-111163327-111163667	36	chr1-111163327-111163667	341	0	ENSG00000134255	1	CEPT1	intron	0	9470	0	-0.476243	-0.238318	1.11908	0.927972	2.03999	2.13871	0.193525	0.0973452	0.211851	-1.08732	-1.03646	-1.02777	-1.05573	0.115733	-0.625721	-0.421896	-0.874732
314	chr1-111203471-111204864	36	chr1-111203471-111204864	1394	1	ENSG00000064886	1	CHI3L2	exon	1	0	0	-0.476243	-0.238318	1.11908	0.927972	2.03999	2.13871	0.193525	0.0973452	0.211851	-1.08732	-1.03646	-1.02777	-1.05573	0.115733	-0.625721	-0.421896	-0.874732
315	chr1-111222344-111223306	36	chr1-111222344-111223306	963	0	ENSG00000064886	1	CHI3L2	intron	0	3709	0	-0.476243	-0.238318	1.11908	0.927972	2.03999	2.13871	0.193525	0.0973452	0.211851	-1.08732	-1.03646	-1.02777	-1.05573	0.115733	-0.625721	-0.421896	-0.874732
316	chr1-111364568-111365060	36	chr1-111364568-111365060	493	0		0		intergenic	0	16226	0	-0.476243	-0.238318	1.11908	0.927972	2.03999	2.13871	0.193525	0.0973452	0.211851	-1.08732	-1.03646	-1.02777	-1.05573	0.115733	-0.625721	-0.421896	-0.874732
317	chr1-111368851-111370306	36	chr1-111368851-111370306	1456	0		0		intergenic	0	20509	0	-0.476243	-0.238318	1.11908	0.927972	2.03999	2.13871	0.193525	0.0973452	0.211851	-1.08732	-1.03646	-1.02777	-1.05573	0.115733	-0.625721	-0.421896	-0.874732
318	chr1-111382015-111382676	36	chr1-111382015-111382676	662	0		0		intergenic	0	33673	0	-0.476243	-0.238318	1.11908	0.927972	2.03999	2.13871	0.193525	0.0973452	0.211851	-1.08732	-1.03646	-1.02777	-1.05573	0.115733	-0.625721	-0.421896	-0.874732
319	chr1-111441428-111442106	36	chr1-111441428-111442106	679	1	ENSG00000116455	1	WDR77	exon	0	5425	0	-0.476243	-0.238318	1.11908	0.927972	2.03999	2.13871	0.193525	0.0973452	0.211851	-1.08732	-1.03646	-1.02777	-1.05573	0.115733	-0.625721	-0.421896	-0.874732
320	chr1-111611724-111612429	36	chr1-111611724-111612429	706	0	ENSG00000116473	1	RAP1A	intron	0	7347	0	-0.476243	-0.238318	1.11908	0.927972	2.03999	2.13871	0.193525	0.0973452	0.211851	-1.08732	-1.03646	-1.02777	-1.05573	0.115733	-0.625721	-0.421896	-0.874732
321	chr1-111714565-111715236	36	chr1-111714565-111715236	672	1	ENSG00000197852	1	FAM212B	exon	0	24016	0	-0.476243	-0.238318	1.11908	0.927972	2.03999	2.13871	0.193525	0.0973452	0.211851	-1.08732	-1.03646	-1.02777	-1.05573	0.115733	-0.625721	-0.421896	-0.874732
322	chr1-111513466-111514051	39	chr1-111513466-111514051	586	0	ENSG00000121933	1	TMIGD3	intron	0	9705	0	-0.265514	-0.196042	-0.334957	-0.326398	-0.341864	-0.322132	-0.279843	-0.330996	-0.251178	-0.23992	-0.124664	-0.252378	-0.287296	-0.275312	0.169945	-0.313648	3.9722
323	chr1-111535246-111536198	39	chr1-111535246-111536198	953	0	ENSG00000121933	1	TMIGD3	intron	0	6019	0	-0.265514	-0.196042	-0.334957	-0.326398	-0.341864	-0.322132	-0.279843	-0.330996	-0.251178	-0.23992	-0.124664	-0.252378	-0.287296	-0.275312	0.169945	-0.313648	3.9722
324	chr1-111565020-111565481	39	chr1-111565020-111565481	462	0	ENSG00000116473	1	RAP1A	promoter	1	1057	0	-0.265514	-0.196042	-0.334957	-0.326398	-0.341864	-0.322132	-0.279843	-0.330996	-0.251178	-0.23992	-0.124664	-0.252378	-0.287296	-0.275312	0.169945	-0.313648	3.9722
325	chr1-11177893-11178760	53	chr1-11177893-11178760	868	0	ENSG00000198793	1	MTOR	intron	0	10580	0	-0.769178	1.00024	0.855473	-0.998579	0.415774	-0.318216	-0.799357	-0.422966	1.5617	-0.719683	1.79075	0.012616	1.66835	-1.14218	-1.2285	-0.908815	0.00257688
326	chr1-11314499-11315402	53	chr1-11314499-11315402	904	0		0		intergenic	0	40564	0	-0.769178	1.00024	0.855473	-0.998579	0.415774	-0.318216	-0.799357	-0.422966	1.5617	-0.719683	1.79075	0.012616	1.66835	-1.14218	-1.2285	-0.908815	0.00257688
327	chr1-11438874-11439657	53	chr1-11438874-11439657	784	0		0		intergenic	0	39508	0	-0.769178	1.00024	0.855473	-0.998579	0.415774	-0.318216	-0.799357	-0.422966	1.5617	-0.719683	1.79075	0.012616	1.66835	-1.14218	-1.2285	-0.908815	0.00257688
328	chr1-111793816-111794619	44	chr1-111793816-111794619	804	0	ENSG00000171385	1	KCND3	intron	0	31398	0	-0.805643	1.49787	1.99762	0.747435	1.27629	1.25532	0.248497	-0.0586003	0.189661	-0.97807	-0.108229	-0.526534	-0.347864	-1.21345	-1.24007	-0.917935	-1.0163
329	chr1-111967172-111968291	44	chr1-111967172-111968291	1120	0	ENSG00000171385	1	KCND3	intron	0	14504	0	-0.805643	1.49787	1.99762	0.747435	1.27629	1.25532	0.248497	-0.0586003	0.189661	-0.97807	-0.108229	-0.526534	-0.347864	-1.21345	-1.24007	-0.917935	-1.0163
330	chr1-112249109-112250069	44	chr1-112249109-112250069	961	0		0		intergenic	0	146111	0	-0.805643	1.49787	1.99762	0.747435	1.27629	1.25532	0.248497	-0.0586003	0.189661	-0.97807	-0.108229	-0.526534	-0.347864	-1.21345	-1.24007	-0.917935	-1.0163
331	chr1-112501702-112503122	44	chr1-112501702-112503122	1421	0	ENSG00000134245	1	WNT2B	intron	0	5655	0	-0.805643	1.49787	1.99762	0.747435	1.27629	1.25532	0.248497	-0.0586003	0.189661	-0.97807	-0.108229	-0.526534	-0.347864	-1.21345	-1.24007	-0.917935	-1.0163
332	chr1-112503820-112504957	44	chr1-112503820-112504957	1138	0	ENSG00000134245	1	WNT2B	intron	0	3820	0	-0.805643	1.49787	1.99762	0.747435	1.27629	1.25532	0.248497	-0.0586003	0.189661	-0.97807	-0.108229	-0.526534	-0.347864	-1.21345	-1.24007	-0.917935	-1.0163
333	chr1-112523796-112525147	44	chr1-112523796-112525147	1352	1	ENSG00000007341	1	ST7L	exon	0	1804	0	-0.805643	1.49787	1.99762	0.747435	1.27629	1.25532	0.248497	-0.0586003	0.189661	-0.97807	-0.108229	-0.526534	-0.347864	-1.21345	-1.24007	-0.917935	-1.0163
334	chr1-112536422-112537909	44	chr1-112536422-112537909	1488	0	ENSG00000007341	1	ST7L	intron	0	4065	0	-0.805643	1.49787	1.99762	0.747435	1.27629	1.25532	0.248497	-0.0586003	0.189661	-0.97807	-0.108229	-0.526534	-0.347864	-1.21345	-1.24007	-0.917935	-1.0163
335	chr1-112671712-112672582	44	chr1-112671712-112672582	871	0	ENSG00000155363	0	MOV10	promoter	1	558	0	-0.805643	1.49787	1.99762	0.747435	1.27629	1.25532	0.248497	-0.0586003	0.189661	-0.97807	-0.108229	-0.526534	-0.347864	-1.21345	-1.24007	-0.917935	-1.0163
336	chr1-112698285-112699267	44	chr1-112698285-112699267	983	1	ENSG00000155363	1	MOV10	exon	1	0	0	-0.805643	1.49787	1.99762	0.747435	1.27629	1.25532	0.248497	-0.0586003	0.189661	-0.97807	-0.108229	-0.526534	-0.347864	-1.21345	-1.24007	-0.917935	-1.0163
337	chr1-112816674-112817694	44	chr1-112816674-112817694	1021	0		0		intergenic	0	96096	0	-0.805643	1.49787	1.99762	0.747435	1.27629	1.25532	0.248497	-0.0586003	0.189661	-0.97807	-0.108229	-0.526534	-0.347864	-1.21345	-1.24007	-0.917935	-1.0163
338	chr1-112849238-112850529	44	chr1-112849238-112850529	1292	0		0		intergenic	0	71862	0	-0.805643	1.49787	1.99762	0.747435	1.27629	1.25532	0.248497	-0.0586003	0.189661	-0.97807	-0.108229	-0.526534	-0.347864	-1.21345	-1.24007	-0.917935	-1.0163
339	chr1-111880642-111881666	41	chr1-111880642-111881666	1025	0	ENSG00000171385	1	KCND3	intron	0	101129	0	-0.58288	-0.417429	-0.789739	-0.614977	-0.698642	-0.675765	-0.537334	-0.258015	0.115047	0.258754	1.77108	2.8844	1.25509	-0.615251	0.0552998	-0.696605	-0.453041
340	chr1-112006024-112007011	41	chr1-112006024-112007011	988	0		0		intergenic	0	16868	0	-0.58288	-0.417429	-0.789739	-0.614977	-0.698642	-0.675765	-0.537334	-0.258015	0.115047	0.258754	1.77108	2.8844	1.25509	-0.615251	0.0552998	-0.696605	-0.453041
341	chr1-112029606-112030902	41	chr1-112029606-112030902	1297	0		0		intergenic	0	40450	0	-0.58288	-0.417429	-0.789739	-0.614977	-0.698642	-0.675765	-0.537334	-0.258015	0.115047	0.258754	1.77108	2.8844	1.25509	-0.615251	0.0552998	-0.696605	-0.453041
342	chr1-112255666-112256980	41	chr1-112255666-112256980	1315	0		0		intergenic	0	139200	0	-0.58288	-0.417429	-0.789739	-0.614977	-0.698642	-0.675765	-0.537334	-0.258015	0.115047	0.258754	1.77108	2.8844	1.25509	-0.615251	0.0552998	-0.696605	-0.453041
343	chr1-112264095-112264972	41	chr1-112264095-112264972	878	0		0		intergenic	0	131208	0	-0.58288	-0.417429	-0.789739	-0.614977	-0.698642	-0.675765	-0.537334	-0.258015	0.115047	0.258754	1.77108	2.8844	1.25509	-0.615251	0.0552998	-0.696605	-0.453041
344	chr1-112393663-112394741	43	chr1-112393663-112394741	1079	0	ENSG00000143079	0	CTTNBP2NL	promoter	1	1439	0	-0.33252	-0.528628	-0.77488	-0.671407	-0.799272	-0.44777	-0.616849	-0.262059	-0.321321	2.19792	-0.163322	-0.17571	-0.743371	0.910114	2.67216	-0.586216	0.643133
345	chr1-112399508-112399762	43	chr1-112399508-112399762	255	0	ENSG00000143079	1	CTTNBP2NL	intron	0	2988	0	-0.33252	-0.528628	-0.77488	-0.671407	-0.799272	-0.44777	-0.616849	-0.262059	-0.321321	2.19792	-0.163322	-0.17571	-0.743371	0.910114	2.67216	-0.586216	0.643133
346	chr1-112543993-112544730	43	chr1-112543993-112544730	738	0	ENSG00000007341	1	ST7L	intron	0	2017	0	-0.33252	-0.528628	-0.77488	-0.671407	-0.799272	-0.44777	-0.616849	-0.262059	-0.321321	2.19792	-0.163322	-0.17571	-0.743371	0.910114	2.67216	-0.586216	0.643133
347	chr1-112688367-112689509	43	chr1-112688367-112689509	1143	1	ENSG00000155363	1	MOV10	exon	0	4395	0	-0.33252	-0.528628	-0.77488	-0.671407	-0.799272	-0.44777	-0.616849	-0.262059	-0.321321	2.19792	-0.163322	-0.17571	-0.743371	0.910114	2.67216	-0.586216	0.643133
348	chr1-112700233-112701197	43	chr1-112700233-112701197	965	1	ENSG00000155366	1	RHOC	exon	0	545	0	-0.33252	-0.528628	-0.77488	-0.671407	-0.799272	-0.44777	-0.616849	-0.262059	-0.321321	2.19792	-0.163322	-0.17571	-0.743371	0.910114	2.67216	-0.586216	0.643133
349	chr1-112704542-112705460	43	chr1-112704542-112705460	919	1	ENSG00000271810	1	RP11-426L16.10	exon	1	0	0	-0.33252	-0.528628	-0.77488	-0.671407	-0.799272	-0.44777	-0.616849	-0.262059	-0.321321	2.19792	-0.163322	-0.17571	-0.743371	0.910114	2.67216	-0.586216	0.643133
350	chr1-112761981-112763425	43	chr1-112761981-112763425	1445	0		0		intergenic	0	41403	0	-0.33252	-0.528628	-0.77488	-0.671407	-0.799272	-0.44777	-0.616849	-0.262059	-0.321321	2.19792	-0.163322	-0.17571	-0.743371	0.910114	2.67216	-0.586216	0.643133
351	chr1-112818795-112819682	43	chr1-112818795-112819682	888	0		0		intergenic	0	98217	0	-0.33252	-0.528628	-0.77488	-0.671407	-0.799272	-0.44777	-0.616849	-0.262059	-0.321321	2.19792	-0.163322	-0.17571	-0.743371	0.910114	2.67216	-0.586216	0.643133
352	chr1-112821383-112821968	43	chr1-112821383-112821968	586	0		0		intergenic	0	100423	0	-0.33252	-0.528628	-0.77488	-0.671407	-0.799272	-0.44777	-0.616849	-0.262059	-0.321321	2.19792	-0.163322	-0.17571	-0.743371	0.910114	2.67216	-0.586216	0.643133
353	chr1-113197453-113198295	47	chr1-113197453-113198295	843	0		0		intergenic	0	94251	0	-0.7877	0.228524	0.197024	-0.709471	-0.0627659	-0.407627	-0.52066	0.372078	2.56177	-0.373385	1.95817	1.14143	0.0635248	-0.958129	-0.976784	-0.848107	-0.877892
354	chr1-113223343-113224125	47	chr1-113223343-113224125	783	0		0		intergenic	0	120141	0	-0.7877	0.228524	0.197024	-0.709471	-0.0627659	-0.407627	-0.52066	0.372078	2.56177	-0.373385	1.95817	1.14143	0.0635248	-0.958129	-0.976784	-0.848107	-0.877892
355	chr1-113225952-113226765	47	chr1-113225952-113226765	814	0		0		intergenic	0	122750	0	-0.7877	0.228524	0.197024	-0.709471	-0.0627659	-0.407627	-0.52066	0.372078	2.56177	-0.373385	1.95817	1.14143	0.0635248	-0.958129	-0.976784	-0.848107	-0.877892
356	chr1-113375616-113376260	51	chr1-113375616-113376260	645	0		0		intergenic	0	14488	0	-0.724297	0.0549471	-0.877099	-0.640487	-1.08013	-0.84278	-0.503858	1.56341	2.02148	0.446754	1.66911	0.967685	0.614172	-0.146184	-0.913172	-1.10617	-0.503378
357	chr1-113534737-113535212	51	chr1-113534737-113535212	476	0	ENSG00000081026	1	MAGI3	intron	0	143475	0	-0.724297	0.0549471	-0.877099	-0.640487	-1.08013	-0.84278	-0.503858	1.56341	2.02148	0.446754	1.66911	0.967685	0.614172	-0.146184	-0.913172	-1.10617	-0.503378
358	chr1-113545270-113546664	51	chr1-113545270-113546664	1395	0	ENSG00000081026	1	MAGI3	intron	0	154008	0	-0.724297	0.0549471	-0.877099	-0.640487	-1.08013	-0.84278	-0.503858	1.56341	2.02148	0.446754	1.66911	0.967685	0.614172	-0.146184	-0.913172	-1.10617	-0.503378
359	chr1-113551554-113552942	51	chr1-113551554-113552942	1389	0	ENSG00000081026	1	MAGI3	intron	0	153038	0	-0.724297	0.0549471	-0.877099	-0.640487	-1.08013	-0.84278	-0.503858	1.56341	2.02148	0.446754	1.66911	0.967685	0.614172	-0.146184	-0.913172	-1.10617	-0.503378
360	chr1-113565184-113566309	51	chr1-113565184-113566309	1126	0	ENSG00000081026	1	MAGI3	intron	0	139671	0	-0.724297	0.0549471	-0.877099	-0.640487	-1.08013	-0.84278	-0.503858	1.56341	2.02148	0.446754	1.66911	0.967685	0.614172	-0.146184	-0.913172	-1.10617	-0.503378
361	chr1-113677258-113678251	51	chr1-113677258-113678251	994	0	ENSG00000081026	1	MAGI3	intron	0	27729	0	-0.724297	0.0549471	-0.877099	-0.640487	-1.08013	-0.84278	-0.503858	1.56341	2.02148	0.446754	1.66911	0.967685	0.614172	-0.146184	-0.913172	-1.10617	-0.503378
362	chr1-113782317-113782835	51	chr1-113782317-113782835	519	0	ENSG00000081019	1	RSBN1	intron	0	14282	0	-0.724297	0.0549471	-0.877099	-0.640487	-1.08013	-0.84278	-0.503858	1.56341	2.02148	0.446754	1.66911	0.967685	0.614172	-0.146184	-0.913172	-1.10617	-0.503378
363	chr1-113856427-113856859	51	chr1-113856427-113856859	433	1	ENSG00000134242	1	PTPN22	exon	0	14804	0	-0.724297	0.0549471	-0.877099	-0.640487	-1.08013	-0.84278	-0.503858	1.56341	2.02148	0.446754	1.66911	0.967685	0.614172	-0.146184	-0.913172	-1.10617	-0.503378
364	chr1-113978812-113979751	51	chr1-113978812-113979751	940	1	ENSG00000116774	1	OLFML3	exon	1	0	0	-0.724297	0.0549471	-0.877099	-0.640487	-1.08013	-0.84278	-0.503858	1.56341	2.02148	0.446754	1.66911	0.967685	0.614172	-0.146184	-0.913172	-1.10617	-0.503378
365	chr1-113979938-113980472	51	chr1-113979938-113980472	535	1	ENSG00000116774	1	OLFML3	exon	1	27	0	-0.724297	0.0549471	-0.877099	-0.640487	-1.08013	-0.84278	-0.503858	1.56341	2.02148	0.446754	1.66911	0.967685	0.614172	-0.146184	-0.913172	-1.10617	-0.503378
366	chr1-114021537-114022400	51	chr1-114021537-114022400	864	0	ENSG00000116774	1	OLFML3	intron	0	41036	0	-0.724297	0.0549471	-0.877099	-0.640487	-1.08013	-0.84278	-0.503858	1.56341	2.02148	0.446754	1.66911	0.967685	0.614172	-0.146184	-0.913172	-1.10617	-0.503378
367	chr1-114023916-114024480	51	chr1-114023916-114024480	565	0	ENSG00000116774	1	OLFML3	intron	0	43415	0	-0.724297	0.0549471	-0.877099	-0.640487	-1.08013	-0.84278	-0.503858	1.56341	2.02148	0.446754	1.66911	0.967685	0.614172	-0.146184	-0.913172	-1.10617	-0.503378
368	chr1-114088186-114089225	51	chr1-114088186-114089225	1040	0		0		intergenic	0	63214	0	-0.724297	0.0549471	-0.877099	-0.640487	-1.08013	-0.84278	-0.503858	1.56341	2.02148	0.446754	1.66911	0.967685	0.614172	-0.146184	-0.913172	-1.10617	-0.503378
369	chr1-114105109-114106030	51	chr1-114105109-114106030	922	0	ENSG00000134207	1	SYT6	intron	0	46409	0	-0.724297	0.0549471	-0.877099	-0.640487	-1.08013	-0.84278	-0.503858	1.56341	2.02148	0.446754	1.66911	0.967685	0.614172	-0.146184	-0.913172	-1.10617	-0.503378
370	chr1-114122236-114123625	51	chr1-114122236-114123625	1390	0	ENSG00000134207	1	SYT6	intron	0	28814	0	-0.724297	0.0549471	-0.877099	-0.640487	-1.08013	-0.84278	-0.503858	1.56341	2.02148	0.446754	1.66911	0.967685	0.614172	-0.146184	-0.913172	-1.10617	-0.503378
371	chr1-114145356-114146091	51	chr1-114145356-114146091	736	0	ENSG00000134207	1	SYT6	intron	0	6348	0	-0.724297	0.0549471	-0.877099	-0.640487	-1.08013	-0.84278	-0.503858	1.56341	2.02148	0.446754	1.66911	0.967685	0.614172	-0.146184	-0.913172	-1.10617	-0.503378
372	chr1-114224141-114225057	51	chr1-114224141-114225057	917	0		0		intergenic	0	70221	0	-0.724297	0.0549471	-0.877099	-0.640487	-1.08013	-0.84278	-0.503858	1.56341	2.02148	0.446754	1.66911	0.967685	0.614172	-0.146184	-0.913172	-1.10617	-0.503378
373	chr1-114270007-114271314	51	chr1-114270007-114271314	1308	0		0		intergenic	0	116087	0	-0.724297	0.0549471	-0.877099	-0.640487	-1.08013	-0.84278	-0.503858	1.56341	2.02148	0.446754	1.66911	0.967685	0.614172	-0.146184	-0.913172	-1.10617	-0.503378
374	chr1-114299190-114300421	51	chr1-114299190-114300421	1232	0		0		intergenic	0	97416	0	-0.724297	0.0549471	-0.877099	-0.640487	-1.08013	-0.84278	-0.503858	1.56341	2.02148	0.446754	1.66911	0.967685	0.614172	-0.146184	-0.913172	-1.10617	-0.503378
375	chr1-114310494-114311664	51	chr1-114310494-114311664	1171	0		0		intergenic	0	86173	0	-0.724297	0.0549471	-0.877099	-0.640487	-1.08013	-0.84278	-0.503858	1.56341	2.02148	0.446754	1.66911	0.967685	0.614172	-0.146184	-0.913172	-1.10617	-0.503378
376	chr1-114318987-114319955	51	chr1-114318987-114319955	969	0		0		intergenic	0	77882	0	-0.724297	0.0549471	-0.877099	-0.640487	-1.08013	-0.84278	-0.503858	1.56341	2.02148	0.446754	1.66911	0.967685	0.614172	-0.146184	-0.913172	-1.10617	-0.503378
377	chr1-114324155-114324991	51	chr1-114324155-114324991	837	0		0		intergenic	0	72846	0	-0.724297	0.0549471	-0.877099	-0.640487	-1.08013	-0.84278	-0.503858	1.56341	2.02148	0.446754	1.66911	0.967685	0.614172	-0.146184	-0.913172	-1.10617	-0.503378
378	chr1-114345619-114347062	51	chr1-114345619-114347062	1444	0		0		intergenic	0	50775	0	-0.724297	0.0549471	-0.877099	-0.640487	-1.08013	-0.84278	-0.503858	1.56341	2.02148	0.446754	1.66911	0.967685	0.614172	-0.146184	-0.913172	-1.10617	-0.503378
379	chr1-114580885-114582288	51	chr1-114580885-114582288	1404	1	ENSG00000116752	1	BCAS2	exon	1	0	0	-0.724297	0.0549471	-0.877099	-0.640487	-1.08013	-0.84278	-0.503858	1.56341	2.02148	0.446754	1.66911	0.967685	0.614172	-0.146184	-0.913172	-1.10617	-0.503378
380	chr1-113614335-113615399	50	chr1-113614335-113615399	1065	1	ENSG00000081026	1	MAGI3	exon	0	90581	0	-0.383681	-0.475731	0.255517	2.40253	1.16933	1.68139	0.224834	1.27121	-0.4586	-0.0628664	-0.987661	-0.719862	-0.874503	-0.479177	-0.739647	-0.819637	-1.00345
381	chr1-113780601-113781214	50	chr1-113780601-113781214	614	0	ENSG00000081019	1	RSBN1	intron	0	12566	0	-0.383681	-0.475731	0.255517	2.40253	1.16933	1.68139	0.224834	1.27121	-0.4586	-0.0628664	-0.987661	-0.719862	-0.874503	-0.479177	-0.739647	-0.819637	-1.00345
382	chr1-113912501-113913577	50	chr1-113912501-113913577	1077	1	ENSG00000118655	1	DCLRE1B	exon	0	7091	0	-0.383681	-0.475731	0.255517	2.40253	1.16933	1.68139	0.224834	1.27121	-0.4586	-0.0628664	-0.987661	-0.719862	-0.874503	-0.479177	-0.739647	-0.819637	-1.00345
383	chr1-113914213-113914646	50	chr1-113914213-113914646	434	0		0		intergenic	0	8803	0	-0.383681	-0.475731	0.255517	2.40253	1.16933	1.68139	0.224834	1.27121	-0.4586	-0.0628664	-0.987661	-0.719862	-0.874503	-0.479177	-0.739647	-0.819637	-1.00345
384	chr1-113964517-113965213	50	chr1-113964517-113965213	697	0	ENSG00000163349	1	HIPK1	intron	0	1076	0	-0.383681	-0.475731	0.255517	2.40253	1.16933	1.68139	0.224834	1.27121	-0.4586	-0.0628664	-0.987661	-0.719862	-0.874503	-0.479177	-0.739647	-0.819637	-1.00345
385	chr1-113873471-113874879	52	chr1-113873471-113874879	1409	0	ENSG00000134242	0	PTPN22	promoter	1	1711	0	-0.495219	-0.713245	0.016161	-0.227032	0.773238	3.55421	-0.509876	0.398731	-0.380352	-0.44046	-0.534725	0.717057	-0.0966197	-0.404309	-0.0932488	-0.806089	-0.758223
386	chr1-114042636-114043992	52	chr1-114042636-114043992	1357	0		0		intergenic	0	62135	0	-0.495219	-0.713245	0.016161	-0.227032	0.773238	3.55421	-0.509876	0.398731	-0.380352	-0.44046	-0.534725	0.717057	-0.0966197	-0.404309	-0.0932488	-0.806089	-0.758223
387	chr1-114075006-114076130	52	chr1-114075006-114076130	1125	0		0		intergenic	0	76309	0	-0.495219	-0.713245	0.016161	-0.227032	0.773238	3.55421	-0.509876	0.398731	-0.380352	-0.44046	-0.534725	0.717057	-0.0966197	-0.404309	-0.0932488	-0.806089	-0.758223
388	chr1-115037117-115038583	55	chr1-115037117-115038583	1467	0		0		intergenic	0	3753	0	-0.916257	0.275444	-0.671485	-0.830106	-0.699497	-0.839049	-0.683808	-0.40039	0.584641	1.78852	2.16746	1.58985	0.923463	-0.875748	-0.50203	-0.643382	-0.267624
389	chr1-115084677-115085614	55	chr1-115084677-115085614	938	0	ENSG00000134198	1	TSPAN2	intron	0	3799	0	-0.916257	0.275444	-0.671485	-0.830106	-0.699497	-0.839049	-0.683808	-0.40039	0.584641	1.78852	2.16746	1.58985	0.923463	-0.875748	-0.50203	-0.643382	-0.267624
390	chr1-115129003-115129688	55	chr1-115129003-115129688	686	0		0		intergenic	0	39502	0	-0.916257	0.275444	-0.671485	-0.830106	-0.699497	-0.839049	-0.683808	-0.40039	0.584641	1.78852	2.16746	1.58985	0.923463	-0.875748	-0.50203	-0.643382	-0.267624
391	chr1-115134897-115136046	55	chr1-115134897-115136046	1150	0		0		intergenic	0	45396	0	-0.916257	0.275444	-0.671485	-0.830106	-0.699497	-0.839049	-0.683808	-0.40039	0.584641	1.78852	2.16746	1.58985	0.923463	-0.875748	-0.50203	-0.643382	-0.267624
392	chr1-115155315-115156205	55	chr1-115155315-115156205	891	0		0		intergenic	0	65814	0	-0.916257	0.275444	-0.671485	-0.830106	-0.699497	-0.839049	-0.683808	-0.40039	0.584641	1.78852	2.16746	1.58985	0.923463	-0.875748	-0.50203	-0.643382	-0.267624
393	chr1-115156923-115157522	55	chr1-115156923-115157522	600	0		0		intergenic	0	67422	0	-0.916257	0.275444	-0.671485	-0.830106	-0.699497	-0.839049	-0.683808	-0.40039	0.584641	1.78852	2.16746	1.58985	0.923463	-0.875748	-0.50203	-0.643382	-0.267624
394	chr1-115183429-115184698	55	chr1-115183429-115184698	1270	0		0		intergenic	0	93928	0	-0.916257	0.275444	-0.671485	-0.830106	-0.699497	-0.839049	-0.683808	-0.40039	0.584641	1.78852	2.16746	1.58985	0.923463	-0.875748	-0.50203	-0.643382	-0.267624
395	chr1-115189905-115191100	55	chr1-115189905-115191100	1196	0		0		intergenic	0	100404	0	-0.916257	0.275444	-0.671485	-0.830106	-0.699497	-0.839049	-0.683808	-0.40039	0.584641	1.78852	2.16746	1.58985	0.923463	-0.875748	-0.50203	-0.643382	-0.267624
396	chr1-115216951-115218344	55	chr1-115216951-115218344	1394	0		0		intergenic	0	119891	0	-0.916257	0.275444	-0.671485	-0.830106	-0.699497	-0.839049	-0.683808	-0.40039	0.584641	1.78852	2.16746	1.58985	0.923463	-0.875748	-0.50203	-0.643382	-0.267624
397	chr1-115224054-115224737	55	chr1-115224054-115224737	684	0		0		intergenic	0	113498	0	-0.916257	0.275444	-0.671485	-0.830106	-0.699497	-0.839049	-0.683808	-0.40039	0.584641	1.78852	2.16746	1.58985	0.923463	-0.875748	-0.50203	-0.643382	-0.267624
398	chr1-115260504-115261896	55	chr1-115260504-115261896	1393	0		0		intergenic	0	76339	0	-0.916257	0.275444	-0.671485	-0.830106	-0.699497	-0.839049	-0.683808	-0.40039	0.584641	1.78852	2.16746	1.58985	0.923463	-0.875748	-0.50203	-0.643382	-0.267624
399	chr1-115266406-115267375	55	chr1-115266406-115267375	970	0		0		intergenic	0	70860	0	-0.916257	0.275444	-0.671485	-0.830106	-0.699497	-0.839049	-0.683808	-0.40039	0.584641	1.78852	2.16746	1.58985	0.923463	-0.875748	-0.50203	-0.643382	-0.267624
400	chr1-115279750-115280621	55	chr1-115279750-115280621	872	0		0		intergenic	0	57614	0	-0.916257	0.275444	-0.671485	-0.830106	-0.699497	-0.839049	-0.683808	-0.40039	0.584641	1.78852	2.16746	1.58985	0.923463	-0.875748	-0.50203	-0.643382	-0.267624
401	chr1-115354335-115355746	55	chr1-115354335-115355746	1412	0		0		intergenic	0	16098	0	-0.916257	0.275444	-0.671485	-0.830106	-0.699497	-0.839049	-0.683808	-0.40039	0.584641	1.78852	2.16746	1.58985	0.923463	-0.875748	-0.50203	-0.643382	-0.267624
402	chr1-115363726-115365030	55	chr1-115363726-115365030	1305	0		0		intergenic	0	25489	0	-0.916257	0.275444	-0.671485	-0.830106	-0.699497	-0.839049	-0.683808	-0.40039	0.584641	1.78852	2.16746	1.58985	0.923463	-0.875748	-0.50203	-0.643382	-0.267624
403	chr1-115365521-115366236	55	chr1-115365521-115366236	716	0		0		intergenic	0	27284	0	-0.916257	0.275444	-0.671485	-0.830106	-0.699497	-0.839049	-0.683808	-0.40039	0.584641	1.78852	2.16746	1.58985	0.923463	-0.875748	-0.50203	-0.643382	-0.267624
404	chr1-115411291-115412052	55	chr1-115411291-115412052	762	0		0		intergenic	0	73054	0	-0.916257	0.275444	-0.671485	-0.830106	-0.699497	-0.839049	-0.683808	-0.40039	0.584641	1.78852	2.16746	1.58985	0.923463	-0.875748	-0.50203	-0.643382	-0.267624
405	chr1-115426026-115426763	55	chr1-115426026-115426763	738	0		0		intergenic	0	87789	0	-0.916257	0.275444	-0.671485	-0.830106	-0.699497	-0.839049	-0.683808	-0.40039	0.584641	1.78852	2.16746	1.58985	0.923463	-0.875748	-0.50203	-0.643382	-0.267624
406	chr1-115433233-115434269	55	chr1-115433233-115434269	1037	0		0		intergenic	0	94996	0	-0.916257	0.275444	-0.671485	-0.830106	-0.699497	-0.839049	-0.683808	-0.40039	0.584641	1.78852	2.16746	1.58985	0.923463	-0.875748	-0.50203	-0.643382	-0.267624
407	chr1-115434690-115435257	55	chr1-115434690-115435257	568	0		0		intergenic	0	96453	0	-0.916257	0.275444	-0.671485	-0.830106	-0.699497	-0.839049	-0.683808	-0.40039	0.584641	1.78852	2.16746	1.58985	0.923463	-0.875748	-0.50203	-0.643382	-0.267624
408	chr1-115454708-115455669	55	chr1-115454708-115455669	962	0		0		intergenic	0	116471	0	-0.916257	0.275444	-0.671485	-0.830106	-0.699497	-0.839049	-0.683808	-0.40039	0.584641	1.78852	2.16746	1.58985	0.923463	-0.875748	-0.50203	-0.643382	-0.267624
409	chr1-115504514-115505749	55	chr1-115504514-115505749	1236	0		0		intergenic	0	136203	0	-0.916257	0.275444	-0.671485	-0.830106	-0.699497	-0.839049	-0.683808	-0.40039	0.584641	1.78852	2.16746	1.58985	0.923463	-0.875748	-0.50203	-0.643382	-0.267624
410	chr1-115594914-115596176	55	chr1-115594914-115596176	1263	0		0		intergenic	0	45776	0	-0.916257	0.275444	-0.671485	-0.830106	-0.699497	-0.839049	-0.683808	-0.40039	0.584641	1.78852	2.16746	1.58985	0.923463	-0.875748	-0.50203	-0.643382	-0.267624
411	chr1-115678985-115679702	55	chr1-115678985-115679702	718	0	ENSG00000173218	1	VANGL1	intron	0	7840	0	-0.916257	0.275444	-0.671485	-0.830106	-0.699497	-0.839049	-0.683808	-0.40039	0.584641	1.78852	2.16746	1.58985	0.923463	-0.875748	-0.50203	-0.643382	-0.267624
412	chr1-115727453-115728427	55	chr1-115727453-115728427	975	0	ENSG00000118729	1	CASQ2	intron	0	4499	0	-0.916257	0.275444	-0.671485	-0.830106	-0.699497	-0.839049	-0.683808	-0.40039	0.584641	1.78852	2.16746	1.58985	0.923463	-0.875748	-0.50203	-0.643382	-0.267624
413	chr1-115929692-115930541	55	chr1-115929692-115930541	850	0		0		intergenic	0	45956	0	-0.916257	0.275444	-0.671485	-0.830106	-0.699497	-0.839049	-0.683808	-0.40039	0.584641	1.78852	2.16746	1.58985	0.923463	-0.875748	-0.50203	-0.643382	-0.267624
414	chr1-115329682-115331025	56	chr1-115329682-115331025	1344	0	ENSG00000134259	1	NGF	intron	0	7210	0	-1.06571	0.276513	1.97293	0.487199	1.41915	2.12368	-0.0098944	-0.594342	-0.0622978	-0.70628	0.0421057	-0.451003	-0.403367	-1.31131	-1.30701	0.240942	-0.651295
415	chr1-115409142-115410068	56	chr1-115409142-115410068	927	0		0		intergenic	0	70905	0	-1.06571	0.276513	1.97293	0.487199	1.41915	2.12368	-0.0098944	-0.594342	-0.0622978	-0.70628	0.0421057	-0.451003	-0.403367	-1.31131	-1.30701	0.240942	-0.651295
416	chr1-115450200-115451261	56	chr1-115450200-115451261	1062	0		0		intergenic	0	111963	0	-1.06571	0.276513	1.97293	0.487199	1.41915	2.12368	-0.0098944	-0.594342	-0.0622978	-0.70628	0.0421057	-0.451003	-0.403367	-1.31131	-1.30701	0.240942	-0.651295
417	chr1-115478563-115479810	56	chr1-115478563-115479810	1248	0		0		intergenic	0	140326	0	-1.06571	0.276513	1.97293	0.487199	1.41915	2.12368	-0.0098944	-0.594342	-0.0622978	-0.70628	0.0421057	-0.451003	-0.403367	-1.31131	-1.30701	0.240942	-0.651295
418	chr1-115496909-115497529	57	chr1-115496909-115497529	621	0		0		intergenic	0	144423	0	-0.25378	0.882533	-0.417354	-0.321179	-0.501688	-0.511357	0.281213	-0.472294	-0.492062	-0.118929	-0.361765	-0.449912	-0.316986	-0.427696	-0.322213	3.75296	0.0505056
419	chr1-115545386-115546646	57	chr1-115545386-115546646	1261	0		0		intergenic	0	95306	0	-0.25378	0.882533	-0.417354	-0.321179	-0.501688	-0.511357	0.281213	-0.472294	-0.492062	-0.118929	-0.361765	-0.449912	-0.316986	-0.427696	-0.322213	3.75296	0.0505056
420	chr1-115665221-115666570	57	chr1-115665221-115666570	1350	0	ENSG00000173218	1	VANGL1	intron	0	4474	0	-0.25378	0.882533	-0.417354	-0.321179	-0.501688	-0.511357	0.281213	-0.472294	-0.492062	-0.118929	-0.361765	-0.449912	-0.316986	-0.427696	-0.322213	3.75296	0.0505056
421	chr1-115714434-115715226	57	chr1-115714434-115715226	793	0	ENSG00000118729	1	CASQ2	intron	0	17700	0	-0.25378	0.882533	-0.417354	-0.321179	-0.501688	-0.511357	0.281213	-0.472294	-0.492062	-0.118929	-0.361765	-0.449912	-0.316986	-0.427696	-0.322213	3.75296	0.0505056
422	chr1-116039665-116040754	58	chr1-116039665-116040754	1090	0	ENSG00000163393	1	SLC22A15	intron	0	6987	0	-0.482081	-0.253574	1.1394	1.3361	1.75238	2.30777	0.528037	-0.308702	-0.705026	-0.896168	-0.938026	-0.795288	-0.661939	-0.883031	-0.496149	0.105535	-0.749241
423	chr1-116285936-116286928	58	chr1-116285936-116286928	993	0		0		intergenic	0	85739	0	-0.482081	-0.253574	1.1394	1.3361	1.75238	2.30777	0.528037	-0.308702	-0.705026	-0.896168	-0.938026	-0.795288	-0.661939	-0.883031	-0.496149	0.105535	-0.749241
424	chr1-116318511-116319446	58	chr1-116318511-116319446	936	0		0		intergenic	0	53221	0	-0.482081	-0.253574	1.1394	1.3361	1.75238	2.30777	0.528037	-0.308702	-0.705026	-0.896168	-0.938026	-0.795288	-0.661939	-0.883031	-0.496149	0.105535	-0.749241
425	chr1-116329559-116330779	58	chr1-116329559-116330779	1221	0		0		intergenic	0	41888	0	-0.482081	-0.253574	1.1394	1.3361	1.75238	2.30777	0.528037	-0.308702	-0.705026	-0.896168	-0.938026	-0.795288	-0.661939	-0.883031	-0.496149	0.105535	-0.749241
426	chr1-116334708-116335933	58	chr1-116334708-116335933	1226	0		0		intergenic	0	36734	0	-0.482081	-0.253574	1.1394	1.3361	1.75238	2.30777	0.528037	-0.308702	-0.705026	-0.896168	-0.938026	-0.795288	-0.661939	-0.883031	-0.496149	0.105535	-0.749241
427	chr1-116415424-116416557	58	chr1-116415424-116416557	1134	0		0		intergenic	0	9314	0	-0.482081	-0.253574	1.1394	1.3361	1.75238	2.30777	0.528037	-0.308702	-0.705026	-0.896168	-0.938026	-0.795288	-0.661939	-0.883031	-0.496149	0.105535	-0.749241
428	chr1-116477231-116478217	58	chr1-116477231-116478217	987	0		0		intergenic	0	66372	0	-0.482081	-0.253574	1.1394	1.3361	1.75238	2.30777	0.528037	-0.308702	-0.705026	-0.896168	-0.938026	-0.795288	-0.661939	-0.883031	-0.496149	0.105535	-0.749241
429	chr1-116545950-116546825	58	chr1-116545950-116546825	876	0	ENSG00000116815	1	CD58	promoter	1	1359	0	-0.482081	-0.253574	1.1394	1.3361	1.75238	2.30777	0.528037	-0.308702	-0.705026	-0.896168	-0.938026	-0.795288	-0.661939	-0.883031	-0.496149	0.105535	-0.749241
430	chr1-116309882-116310813	61	chr1-116309882-116310813	932	0		0		intergenic	0	61854	0	-0.632421	0.698534	-0.683575	-0.7777	-0.789371	-0.472986	-0.672325	-0.289497	1.49251	-0.335773	2.87682	0.384986	1.25984	-0.419053	-0.938503	-0.311498	-0.389988
431	chr1-116377580-116378138	61	chr1-116377580-116378138	559	0	ENSG00000163399	1	ATP1A1	intron	0	3712	0	-0.632421	0.698534	-0.683575	-0.7777	-0.789371	-0.472986	-0.672325	-0.289497	1.49251	-0.335773	2.87682	0.384986	1.25984	-0.419053	-0.938503	-0.311498	-0.389988
432	chr1-116671971-116672344	61	chr1-116671971-116672344	374	0		0		intergenic	0	4215	0	-0.632421	0.698534	-0.683575	-0.7777	-0.789371	-0.472986	-0.672325	-0.289497	1.49251	-0.335773	2.87682	0.384986	1.25984	-0.419053	-0.938503	-0.311498	-0.389988
433	chr1-116672580-116673203	61	chr1-116672580-116673203	624	0		0		intergenic	0	4824	0	-0.632421	0.698534	-0.683575	-0.7777	-0.789371	-0.472986	-0.672325	-0.289497	1.49251	-0.335773	2.87682	0.384986	1.25984	-0.419053	-0.938503	-0.311498	-0.389988
434	chr1-116673805-116675120	61	chr1-116673805-116675120	1316	0		0		intergenic	0	6049	0	-0.632421	0.698534	-0.683575	-0.7777	-0.789371	-0.472986	-0.672325	-0.289497	1.49251	-0.335773	2.87682	0.384986	1.25984	-0.419053	-0.938503	-0.311498	-0.389988
435	chr1-116690472-116691559	61	chr1-116690472-116691559	1088	0		0		intergenic	0	22716	0	-0.632421	0.698534	-0.683575	-0.7777	-0.789371	-0.472986	-0.672325	-0.289497	1.49251	-0.335773	2.87682	0.384986	1.25984	-0.419053	-0.938503	-0.311498	-0.389988
436	chr1-116882088-116882500	61	chr1-116882088-116882500	413	0		0		intergenic	0	27556	0	-0.632421	0.698534	-0.683575	-0.7777	-0.789371	-0.472986	-0.672325	-0.289497	1.49251	-0.335773	2.87682	0.384986	1.25984	-0.419053	-0.938503	-0.311498	-0.389988
437	chr1-117231570-117232876	61	chr1-117231570-117232876	1307	0		0		intergenic	0	20609	0	-0.632421	0.698534	-0.683575	-0.7777	-0.789371	-0.472986	-0.672325	-0.289497	1.49251	-0.335773	2.87682	0.384986	1.25984	-0.419053	-0.938503	-0.311498	-0.389988
438	chr1-117237418-117238761	61	chr1-117237418-117238761	1344	0		0		intergenic	0	26457	0	-0.632421	0.698534	-0.683575	-0.7777	-0.789371	-0.472986	-0.672325	-0.289497	1.49251	-0.335773	2.87682	0.384986	1.25984	-0.419053	-0.938503	-0.311498	-0.389988
439	chr1-117239060-117239955	61	chr1-117239060-117239955	896	0		0		intergenic	0	28099	0	-0.632421	0.698534	-0.683575	-0.7777	-0.789371	-0.472986	-0.672325	-0.289497	1.49251	-0.335773	2.87682	0.384986	1.25984	-0.419053	-0.938503	-0.311498	-0.389988
440	chr1-11647831-11648367	72	chr1-11647831-11648367	537	0		0		intergenic	0	2345	0	-1.10602	-0.489103	-0.989554	0.256946	-0.697337	-0.23257	-0.124035	-0.266627	-0.239143	1.19405	0.114735	-0.408455	-0.290888	3.0915	1.03609	-1.17516	0.325577
441	chr1-11707415-11708320	72	chr1-11707415-11708320	906	0	ENSG00000162490	1	DRAXIN	intron	0	15685	0	-1.10602	-0.489103	-0.989554	0.256946	-0.697337	-0.23257	-0.124035	-0.266627	-0.239143	1.19405	0.114735	-0.408455	-0.290888	3.0915	1.03609	-1.17516	0.325577
442	chr1-11729694-11730886	72	chr1-11729694-11730886	1193	0		0		intergenic	0	5197	0	-1.10602	-0.489103	-0.989554	0.256946	-0.697337	-0.23257	-0.124035	-0.266627	-0.239143	1.19405	0.114735	-0.408455	-0.290888	3.0915	1.03609	-1.17516	0.325577
443	chr1-11731348-11732285	72	chr1-11731348-11732285	938	0		0		intergenic	0	3798	0	-1.10602	-0.489103	-0.989554	0.256946	-0.697337	-0.23257	-0.124035	-0.266627	-0.239143	1.19405	0.114735	-0.408455	-0.290888	3.0915	1.03609	-1.17516	0.325577
444	chr1-11784427-11785470	72	chr1-11784427-11785470	1044	1	ENSG00000215910	1	C1orf167	exon	1	0	0	-1.10602	-0.489103	-0.989554	0.256946	-0.697337	-0.23257	-0.124035	-0.266627	-0.239143	1.19405	0.114735	-0.408455	-0.290888	3.0915	1.03609	-1.17516	0.325577
445	chr1-11790506-11791311	72	chr1-11790506-11791311	806	1	ENSG00000177000	1	MTHFR	exon	0	2693	0	-1.10602	-0.489103	-0.989554	0.256946	-0.697337	-0.23257	-0.124035	-0.266627	-0.239143	1.19405	0.114735	-0.408455	-0.290888	3.0915	1.03609	-1.17516	0.325577
446	chr1-11802706-11803977	72	chr1-11802706-11803977	1272	1	ENSG00000177000	1	MTHFR	exon	1	0	0	-1.10602	-0.489103	-0.989554	0.256946	-0.697337	-0.23257	-0.124035	-0.266627	-0.239143	1.19405	0.114735	-0.408455	-0.290888	3.0915	1.03609	-1.17516	0.325577
447	chr1-11814621-11815466	72	chr1-11814621-11815466	846	0	ENSG00000011021	1	CLCN6	intron	0	7700	0	-1.10602	-0.489103	-0.989554	0.256946	-0.697337	-0.23257	-0.124035	-0.266627	-0.239143	1.19405	0.114735	-0.408455	-0.290888	3.0915	1.03609	-1.17516	0.325577
448	chr1-11841856-11842675	72	chr1-11841856-11842675	820	1	ENSG00000011021	1	CLCN6	exon	0	5107	0	-1.10602	-0.489103	-0.989554	0.256946	-0.697337	-0.23257	-0.124035	-0.266627	-0.239143	1.19405	0.114735	-0.408455	-0.290888	3.0915	1.03609	-1.17516	0.325577
449	chr1-11858580-11859657	72	chr1-11858580-11859657	1078	1	ENSG00000120937	1	NPPB	exon	1	0	0	-1.10602	-0.489103	-0.989554	0.256946	-0.697337	-0.23257	-0.124035	-0.266627	-0.239143	1.19405	0.114735	-0.408455	-0.290888	3.0915	1.03609	-1.17516	0.325577
450	chr1-11873946-11874970	72	chr1-11873946-11874970	1025	0		0		intergenic	0	15014	0	-1.10602	-0.489103	-0.989554	0.256946	-0.697337	-0.23257	-0.124035	-0.266627	-0.239143	1.19405	0.114735	-0.408455	-0.290888	3.0915	1.03609	-1.17516	0.325577
451	chr1-11880634-11881570	72	chr1-11880634-11881570	937	0		0		intergenic	0	21702	0	-1.10602	-0.489103	-0.989554	0.256946	-0.697337	-0.23257	-0.124035	-0.266627	-0.239143	1.19405	0.114735	-0.408455	-0.290888	3.0915	1.03609	-1.17516	0.325577
452	chr1-11882728-11883545	72	chr1-11882728-11883545	818	0		0		intergenic	0	23796	0	-1.10602	-0.489103	-0.989554	0.256946	-0.697337	-0.23257	-0.124035	-0.266627	-0.239143	1.19405	0.114735	-0.408455	-0.290888	3.0915	1.03609	-1.17516	0.325577
453	chr1-11898261-11899424	72	chr1-11898261-11899424	1164	0		0		intergenic	0	26978	0	-1.10602	-0.489103	-0.989554	0.256946	-0.697337	-0.23257	-0.124035	-0.266627	-0.239143	1.19405	0.114735	-0.408455	-0.290888	3.0915	1.03609	-1.17516	0.325577
454	chr1-11925568-11926904	72	chr1-11925568-11926904	1337	1	ENSG00000116685	1	KIAA2013	exon	1	0	0	-1.10602	-0.489103	-0.989554	0.256946	-0.697337	-0.23257	-0.124035	-0.266627	-0.239143	1.19405	0.114735	-0.408455	-0.290888	3.0915	1.03609	-1.17516	0.325577
455	chr1-11933911-11935142	72	chr1-11933911-11935142	1232	1	ENSG00000083444	1	PLOD1	exon	1	0	0	-1.10602	-0.489103	-0.989554	0.256946	-0.697337	-0.23257	-0.124035	-0.266627	-0.239143	1.19405	0.114735	-0.408455	-0.290888	3.0915	1.03609	-1.17516	0.325577
456	chr1-11960389-11961047	72	chr1-11960389-11961047	659	1	ENSG00000083444	1	PLOD1	exon	0	3640	0	-1.10602	-0.489103	-0.989554	0.256946	-0.697337	-0.23257	-0.124035	-0.266627	-0.239143	1.19405	0.114735	-0.408455	-0.290888	3.0915	1.03609	-1.17516	0.325577
457	chr1-11961082-11961638	72	chr1-11961082-11961638	557	0	ENSG00000083444	1	PLOD1	intron	0	3049	0	-1.10602	-0.489103	-0.989554	0.256946	-0.697337	-0.23257	-0.124035	-0.266627	-0.239143	1.19405	0.114735	-0.408455	-0.290888	3.0915	1.03609	-1.17516	0.325577
458	chr1-11966687-11967538	72	chr1-11966687-11967538	852	1	ENSG00000083444	1	PLOD1	exon	0	1984	0	-1.10602	-0.489103	-0.989554	0.256946	-0.697337	-0.23257	-0.124035	-0.266627	-0.239143	1.19405	0.114735	-0.408455	-0.290888	3.0915	1.03609	-1.17516	0.325577
459	chr1-11983416-11984307	72	chr1-11983416-11984307	892	0	ENSG00000116688	1	MFN2	intron	0	1423	0	-1.10602	-0.489103	-0.989554	0.256946	-0.697337	-0.23257	-0.124035	-0.266627	-0.239143	1.19405	0.114735	-0.408455	-0.290888	3.0915	1.03609	-1.17516	0.325577
460	chr1-12020176-12020418	72	chr1-12020176-12020418	243	0	ENSG00000116691	1	MIIP	promoter	1	709	0	-1.10602	-0.489103	-0.989554	0.256946	-0.697337	-0.23257	-0.124035	-0.266627	-0.239143	1.19405	0.114735	-0.408455	-0.290888	3.0915	1.03609	-1.17516	0.325577
461	chr1-12034139-12034803	72	chr1-12034139-12034803	665	0		0		intergenic	0	3011	0	-1.10602	-0.489103	-0.989554	0.256946	-0.697337	-0.23257	-0.124035	-0.266627	-0.239143	1.19405	0.114735	-0.408455	-0.290888	3.0915	1.03609	-1.17516	0.325577
462	chr1-12040267-12040966	72	chr1-12040267-12040966	700	0		0		intergenic	0	9139	0	-1.10602	-0.489103	-0.989554	0.256946	-0.697337	-0.23257	-0.124035	-0.266627	-0.239143	1.19405	0.114735	-0.408455	-0.290888	3.0915	1.03609	-1.17516	0.325577
463	chr1-12062887-12064103	72	chr1-12062887-12064103	1217	1	ENSG00000120949	1	TNFRSF8	exon	1	0	0	-1.10602	-0.489103	-0.989554	0.256946	-0.697337	-0.23257	-0.124035	-0.266627	-0.239143	1.19405	0.114735	-0.408455	-0.290888	3.0915	1.03609	-1.17516	0.325577
464	chr1-12075262-12076237	72	chr1-12075262-12076237	976	0	ENSG00000120949	1	TNFRSF8	intron	0	11791	0	-1.10602	-0.489103	-0.989554	0.256946	-0.697337	-0.23257	-0.124035	-0.266627	-0.239143	1.19405	0.114735	-0.408455	-0.290888	3.0915	1.03609	-1.17516	0.325577
465	chr1-12078784-12079918	72	chr1-12078784-12079918	1135	0	ENSG00000120949	1	TNFRSF8	intron	0	15313	0	-1.10602	-0.489103	-0.989554	0.256946	-0.697337	-0.23257	-0.124035	-0.266627	-0.239143	1.19405	0.114735	-0.408455	-0.290888	3.0915	1.03609	-1.17516	0.325577
466	chr1-12112674-12113210	72	chr1-12112674-12113210	537	0	ENSG00000120949	1	TNFRSF8	intron	0	12688	0	-1.10602	-0.489103	-0.989554	0.256946	-0.697337	-0.23257	-0.124035	-0.266627	-0.239143	1.19405	0.114735	-0.408455	-0.290888	3.0915	1.03609	-1.17516	0.325577
467	chr1-12132696-12133479	72	chr1-12132696-12133479	784	0	ENSG00000120949	1	TNFRSF8	intron	0	6761	0	-1.10602	-0.489103	-0.989554	0.256946	-0.697337	-0.23257	-0.124035	-0.266627	-0.239143	1.19405	0.114735	-0.408455	-0.290888	3.0915	1.03609	-1.17516	0.325577
468	chr1-12140560-12141809	72	chr1-12140560-12141809	1250	0	ENSG00000120949	1	TNFRSF8	intron	0	14625	0	-1.10602	-0.489103	-0.989554	0.256946	-0.697337	-0.23257	-0.124035	-0.266627	-0.239143	1.19405	0.114735	-0.408455	-0.290888	3.0915	1.03609	-1.17516	0.325577
469	chr1-12143179-12144156	72	chr1-12143179-12144156	978	1	ENSG00000120949	1	TNFRSF8	exon	0	17244	0	-1.10602	-0.489103	-0.989554	0.256946	-0.697337	-0.23257	-0.124035	-0.266627	-0.239143	1.19405	0.114735	-0.408455	-0.290888	3.0915	1.03609	-1.17516	0.325577
470	chr1-12146730-12147632	72	chr1-12146730-12147632	903	0		0		intergenic	0	19310	0	-1.10602	-0.489103	-0.989554	0.256946	-0.697337	-0.23257	-0.124035	-0.266627	-0.239143	1.19405	0.114735	-0.408455	-0.290888	3.0915	1.03609	-1.17516	0.325577
471	chr1-12147768-12148831	72	chr1-12147768-12148831	1064	0		0		intergenic	0	18111	0	-1.10602	-0.489103	-0.989554	0.256946	-0.697337	-0.23257	-0.124035	-0.266627	-0.239143	1.19405	0.114735	-0.408455	-0.290888	3.0915	1.03609	-1.17516	0.325577
472	chr1-12153064-12153746	72	chr1-12153064-12153746	683	0		0		intergenic	0	13196	0	-1.10602	-0.489103	-0.989554	0.256946	-0.697337	-0.23257	-0.124035	-0.266627	-0.239143	1.19405	0.114735	-0.408455	-0.290888	3.0915	1.03609	-1.17516	0.325577
473	chr1-12161281-12162282	72	chr1-12161281-12162282	1002	0		0		intergenic	0	4660	0	-1.10602	-0.489103	-0.989554	0.256946	-0.697337	-0.23257	-0.124035	-0.266627	-0.239143	1.19405	0.114735	-0.408455	-0.290888	3.0915	1.03609	-1.17516	0.325577
474	chr1-12166610-12168006	72	chr1-12166610-12168006	1397	1	ENSG00000028137	1	TNFRSF1B	exon	1	0	0	-1.10602	-0.489103	-0.989554	0.256946	-0.697337	-0.23257	-0.124035	-0.266627	-0.239143	1.19405	0.114735	-0.408455	-0.290888	3.0915	1.03609	-1.17516	0.325577
475	chr1-12168138-12169156	72	chr1-12168138-12169156	1019	0	ENSG00000028137	1	TNFRSF1B	intron	0	1134	0	-1.10602	-0.489103	-0.989554	0.256946	-0.697337	-0.23257	-0.124035	-0.266627	-0.239143	1.19405	0.114735	-0.408455	-0.290888	3.0915	1.03609	-1.17516	0.325577
476	chr1-12173499-12174070	72	chr1-12173499-12174070	572	0	ENSG00000028137	1	TNFRSF1B	intron	0	6495	0	-1.10602	-0.489103	-0.989554	0.256946	-0.697337	-0.23257	-0.124035	-0.266627	-0.239143	1.19405	0.114735	-0.408455	-0.290888	3.0915	1.03609	-1.17516	0.325577
477	chr1-12174611-12175792	72	chr1-12174611-12175792	1182	0	ENSG00000028137	1	TNFRSF1B	intron	0	7607	0	-1.10602	-0.489103	-0.989554	0.256946	-0.697337	-0.23257	-0.124035	-0.266627	-0.239143	1.19405	0.114735	-0.408455	-0.290888	3.0915	1.03609	-1.17516	0.325577
478	chr1-12177974-12179451	72	chr1-12177974-12179451	1478	0	ENSG00000028137	1	TNFRSF1B	intron	0	10970	0	-1.10602	-0.489103	-0.989554	0.256946	-0.697337	-0.23257	-0.124035	-0.266627	-0.239143	1.19405	0.114735	-0.408455	-0.290888	3.0915	1.03609	-1.17516	0.325577
479	chr1-12180254-12180577	72	chr1-12180254-12180577	324	0	ENSG00000028137	1	TNFRSF1B	intron	0	11260	0	-1.10602	-0.489103	-0.989554	0.256946	-0.697337	-0.23257	-0.124035	-0.266627	-0.239143	1.19405	0.114735	-0.408455	-0.290888	3.0915	1.03609	-1.17516	0.325577
480	chr1-12183842-12184802	72	chr1-12183842-12184802	961	0	ENSG00000028137	1	TNFRSF1B	intron	0	7035	0	-1.10602	-0.489103	-0.989554	0.256946	-0.697337	-0.23257	-0.124035	-0.266627	-0.239143	1.19405	0.114735	-0.408455	-0.290888	3.0915	1.03609	-1.17516	0.325577
481	chr1-12185473-12186325	72	chr1-12185473-12186325	853	0	ENSG00000028137	1	TNFRSF1B	intron	0	5512	0	-1.10602	-0.489103	-0.989554	0.256946	-0.697337	-0.23257	-0.124035	-0.266627	-0.239143	1.19405	0.114735	-0.408455	-0.290888	3.0915	1.03609	-1.17516	0.325577
482	chr1-12196422-12197082	72	chr1-12196422-12197082	661	0	ENSG00000028137	1	TNFRSF1B	intron	0	4583	0	-1.10602	-0.489103	-0.989554	0.256946	-0.697337	-0.23257	-0.124035	-0.266627	-0.239143	1.19405	0.114735	-0.408455	-0.290888	3.0915	1.03609	-1.17516	0.325577
483	chr1-12208183-12209581	72	chr1-12208183-12209581	1399	1	ENSG00000028137	1	TNFRSF1B	exon	0	16344	0	-1.10602	-0.489103	-0.989554	0.256946	-0.697337	-0.23257	-0.124035	-0.266627	-0.239143	1.19405	0.114735	-0.408455	-0.290888	3.0915	1.03609	-1.17516	0.325577
484	chr1-12210504-12210960	72	chr1-12210504-12210960	457	0		0		intergenic	0	18665	0	-1.10602	-0.489103	-0.989554	0.256946	-0.697337	-0.23257	-0.124035	-0.266627	-0.239143	1.19405	0.114735	-0.408455	-0.290888	3.0915	1.03609	-1.17516	0.325577
485	chr1-12218284-12219092	72	chr1-12218284-12219092	809	0		0		intergenic	0	10974	0	-1.10602	-0.489103	-0.989554	0.256946	-0.697337	-0.23257	-0.124035	-0.266627	-0.239143	1.19405	0.114735	-0.408455	-0.290888	3.0915	1.03609	-1.17516	0.325577
486	chr1-12316173-12316941	72	chr1-12316173-12316941	769	0	ENSG00000048707	1	VPS13D	intron	0	4646	0	-1.10602	-0.489103	-0.989554	0.256946	-0.697337	-0.23257	-0.124035	-0.266627	-0.239143	1.19405	0.114735	-0.408455	-0.290888	3.0915	1.03609	-1.17516	0.325577
487	chr1-12332706-12333413	72	chr1-12332706-12333413	708	1	ENSG00000048707	1	VPS13D	exon	0	11451	0	-1.10602	-0.489103	-0.989554	0.256946	-0.697337	-0.23257	-0.124035	-0.266627	-0.239143	1.19405	0.114735	-0.408455	-0.290888	3.0915	1.03609	-1.17516	0.325577
488	chr1-12336290-12336895	72	chr1-12336290-12336895	606	1	ENSG00000048707	1	VPS13D	exon	0	7969	0	-1.10602	-0.489103	-0.989554	0.256946	-0.697337	-0.23257	-0.124035	-0.266627	-0.239143	1.19405	0.114735	-0.408455	-0.290888	3.0915	1.03609	-1.17516	0.325577
489	chr1-12344452-12345823	72	chr1-12344452-12345823	1372	1	ENSG00000048707	1	VPS13D	exon	1	0	0	-1.10602	-0.489103	-0.989554	0.256946	-0.697337	-0.23257	-0.124035	-0.266627	-0.239143	1.19405	0.114735	-0.408455	-0.290888	3.0915	1.03609	-1.17516	0.325577
490	chr1-12355929-12357359	72	chr1-12355929-12357359	1431	1	ENSG00000048707	1	VPS13D	exon	0	10310	0	-1.10602	-0.489103	-0.989554	0.256946	-0.697337	-0.23257	-0.124035	-0.266627	-0.239143	1.19405	0.114735	-0.408455	-0.290888	3.0915	1.03609	-1.17516	0.325577
491	chr1-12359613-12360414	72	chr1-12359613-12360414	802	0	ENSG00000048707	1	VPS13D	intron	0	7255	0	-1.10602	-0.489103	-0.989554	0.256946	-0.697337	-0.23257	-0.124035	-0.266627	-0.239143	1.19405	0.114735	-0.408455	-0.290888	3.0915	1.03609	-1.17516	0.325577
492	chr1-12376084-12377100	72	chr1-12376084-12377100	1017	0	ENSG00000048707	1	VPS13D	intron	0	8413	0	-1.10602	-0.489103	-0.989554	0.256946	-0.697337	-0.23257	-0.124035	-0.266627	-0.239143	1.19405	0.114735	-0.408455	-0.290888	3.0915	1.03609	-1.17516	0.325577
493	chr1-12435409-12436009	72	chr1-12435409-12436009	601	0	ENSG00000048707	1	VPS13D	intron	0	25570	0	-1.10602	-0.489103	-0.989554	0.256946	-0.697337	-0.23257	-0.124035	-0.266627	-0.239143	1.19405	0.114735	-0.408455	-0.290888	3.0915	1.03609	-1.17516	0.325577
494	chr1-12460763-12462138	72	chr1-12460763-12462138	1376	0	ENSG00000048707	1	VPS13D	intron	0	2801	0	-1.10602	-0.489103	-0.989554	0.256946	-0.697337	-0.23257	-0.124035	-0.266627	-0.239143	1.19405	0.114735	-0.408455	-0.290888	3.0915	1.03609	-1.17516	0.325577
495	chr1-12469353-12470581	72	chr1-12469353-12470581	1229	0	ENSG00000048707	1	VPS13D	intron	0	4412	0	-1.10602	-0.489103	-0.989554	0.256946	-0.697337	-0.23257	-0.124035	-0.266627	-0.239143	1.19405	0.114735	-0.408455	-0.290888	3.0915	1.03609	-1.17516	0.325577
496	chr1-12473784-12474444	72	chr1-12473784-12474444	661	0	ENSG00000048707	1	VPS13D	intron	0	8843	0	-1.10602	-0.489103	-0.989554	0.256946	-0.697337	-0.23257	-0.124035	-0.266627	-0.239143	1.19405	0.114735	-0.408455	-0.290888	3.0915	1.03609	-1.17516	0.325577
497	chr1-12480727-12481095	72	chr1-12480727-12481095	369	0	ENSG00000048707	1	VPS13D	intron	0	15786	0	-1.10602	-0.489103	-0.989554	0.256946	-0.697337	-0.23257	-0.124035	-0.266627	-0.239143	1.19405	0.114735	-0.408455	-0.290888	3.0915	1.03609	-1.17516	0.325577
498	chr1-12485156-12486025	72	chr1-12485156-12486025	870	0	ENSG00000048707	1	VPS13D	intron	0	11200	0	-1.10602	-0.489103	-0.989554	0.256946	-0.697337	-0.23257	-0.124035	-0.266627	-0.239143	1.19405	0.114735	-0.408455	-0.290888	3.0915	1.03609	-1.17516	0.325577
499	chr1-12486187-12486981	72	chr1-12486187-12486981	795	0	ENSG00000048707	1	VPS13D	intron	0	10244	0	-1.10602	-0.489103	-0.989554	0.256946	-0.697337	-0.23257	-0.124035	-0.266627	-0.239143	1.19405	0.114735	-0.408455	-0.290888	3.0915	1.03609	-1.17516	0.325577
500	chr1-12495647-12496987	72	chr1-12495647-12496987	1341	0	ENSG00000048707	1	VPS13D	promoter	1	238	0	-1.10602	-0.489103	-0.989554	0.256946	-0.697337	-0.23257	-0.124035	-0.266627	-0.239143	1.19405	0.114735	-0.408455	-0.290888	3.0915	1.03609	-1.17516	0.325577
501	chr1-12504947-12505708	72	chr1-12504947-12505708	762	0	ENSG00000048707	1	VPS13D	intron	0	7720	0	-1.10602	-0.489103	-0.989554	0.256946	-0.697337	-0.23257	-0.124035	-0.266627	-0.239143	1.19405	0.114735	-0.408455	-0.290888	3.0915	1.03609	-1.17516	0.325577
502	chr1-12510116-12511438	72	chr1-12510116-12511438	1323	1	ENSG00000048707	1	VPS13D	exon	0	12889	0	-1.10602	-0.489103	-0.989554	0.256946	-0.697337	-0.23257	-0.124035	-0.266627	-0.239143	1.19405	0.114735	-0.408455	-0.290888	3.0915	1.03609	-1.17516	0.325577
503	chr1-12518643-12519997	72	chr1-12518643-12519997	1355	0		0		intergenic	0	21416	0	-1.10602	-0.489103	-0.989554	0.256946	-0.697337	-0.23257	-0.124035	-0.266627	-0.239143	1.19405	0.114735	-0.408455	-0.290888	3.0915	1.03609	-1.17516	0.325577
504	chr1-12520911-12521709	72	chr1-12520911-12521709	799	0		0		intergenic	0	23684	0	-1.10602	-0.489103	-0.989554	0.256946	-0.697337	-0.23257	-0.124035	-0.266627	-0.239143	1.19405	0.114735	-0.408455	-0.290888	3.0915	1.03609	-1.17516	0.325577
505	chr1-12539760-12540872	72	chr1-12539760-12540872	1113	0		0		intergenic	0	42533	0	-1.10602	-0.489103	-0.989554	0.256946	-0.697337	-0.23257	-0.124035	-0.266627	-0.239143	1.19405	0.114735	-0.408455	-0.290888	3.0915	1.03609	-1.17516	0.325577
506	chr1-12541107-12541973	72	chr1-12541107-12541973	867	0		0		intergenic	0	43880	0	-1.10602	-0.489103	-0.989554	0.256946	-0.697337	-0.23257	-0.124035	-0.266627	-0.239143	1.19405	0.114735	-0.408455	-0.290888	3.0915	1.03609	-1.17516	0.325577
507	chr1-12543650-12543880	72	chr1-12543650-12543880	231	0		0		intergenic	0	46423	0	-1.10602	-0.489103	-0.989554	0.256946	-0.697337	-0.23257	-0.124035	-0.266627	-0.239143	1.19405	0.114735	-0.408455	-0.290888	3.0915	1.03609	-1.17516	0.325577
508	chr1-12552456-12553636	72	chr1-12552456-12553636	1181	0		0		intergenic	0	42671	0	-1.10602	-0.489103	-0.989554	0.256946	-0.697337	-0.23257	-0.124035	-0.266627	-0.239143	1.19405	0.114735	-0.408455	-0.290888	3.0915	1.03609	-1.17516	0.325577
509	chr1-12556241-12556920	72	chr1-12556241-12556920	680	0		0		intergenic	0	39387	0	-1.10602	-0.489103	-0.989554	0.256946	-0.697337	-0.23257	-0.124035	-0.266627	-0.239143	1.19405	0.114735	-0.408455	-0.290888	3.0915	1.03609	-1.17516	0.325577
510	chr1-12564876-12565628	72	chr1-12564876-12565628	753	0		0		intergenic	0	30679	0	-1.10602	-0.489103	-0.989554	0.256946	-0.697337	-0.23257	-0.124035	-0.266627	-0.239143	1.19405	0.114735	-0.408455	-0.290888	3.0915	1.03609	-1.17516	0.325577
511	chr1-12593588-12593971	72	chr1-12593588-12593971	384	0	ENSG00000162496	1	DHRS3	intron	0	2336	0	-1.10602	-0.489103	-0.989554	0.256946	-0.697337	-0.23257	-0.124035	-0.266627	-0.239143	1.19405	0.114735	-0.408455	-0.290888	3.0915	1.03609	-1.17516	0.325577
512	chr1-12598631-12599513	72	chr1-12598631-12599513	883	0	ENSG00000162496	1	DHRS3	intron	0	2322	0	-1.10602	-0.489103	-0.989554	0.256946	-0.697337	-0.23257	-0.124035	-0.266627	-0.239143	1.19405	0.114735	-0.408455	-0.290888	3.0915	1.03609	-1.17516	0.325577
513	chr1-12604068-12604712	72	chr1-12604068-12604712	645	0	ENSG00000162496	1	DHRS3	intron	0	7759	0	-1.10602	-0.489103	-0.989554	0.256946	-0.697337	-0.23257	-0.124035	-0.266627	-0.239143	1.19405	0.114735	-0.408455	-0.290888	3.0915	1.03609	-1.17516	0.325577
514	chr1-12621923-12622623	72	chr1-12621923-12622623	701	0		0		intergenic	0	4191	0	-1.10602	-0.489103	-0.989554	0.256946	-0.697337	-0.23257	-0.124035	-0.266627	-0.239143	1.19405	0.114735	-0.408455	-0.290888	3.0915	1.03609	-1.17516	0.325577
515	chr1-116497669-116498048	59	chr1-116497669-116498048	380	0		0		intergenic	0	46541	0	-0.261477	-0.278169	-0.301154	-0.300276	-0.287018	-0.285123	-0.271694	-0.284985	-0.259858	-0.291904	-0.216805	-0.225461	-0.197389	3.99075	-0.301008	-0.008556	-0.219876
516	chr1-116504180-116504834	59	chr1-116504180-116504834	655	0		0		intergenic	0	39755	0	-0.261477	-0.278169	-0.301154	-0.300276	-0.287018	-0.285123	-0.271694	-0.284985	-0.259858	-0.291904	-0.216805	-0.225461	-0.197389	3.99075	-0.301008	-0.008556	-0.219876
517	chr1-116514857-116515931	59	chr1-116514857-116515931	1075	0	ENSG00000116815	1	CD58	intron	0	28658	0	-0.261477	-0.278169	-0.301154	-0.300276	-0.287018	-0.285123	-0.271694	-0.284985	-0.259858	-0.291904	-0.216805	-0.225461	-0.197389	3.99075	-0.301008	-0.008556	-0.219876
518	chr1-116794478-116795042	59	chr1-116794478-116795042	565	0		0		intergenic	0	40010	0	-0.261477	-0.278169	-0.301154	-0.300276	-0.287018	-0.285123	-0.271694	-0.284985	-0.259858	-0.291904	-0.216805	-0.225461	-0.197389	3.99075	-0.301008	-0.008556	-0.219876
519	chr1-116919785-116920102	60	chr1-116919785-116920102	318	0	ENSG00000134247	1	PTGFRN	intron	0	9727	0	-0.440075	-0.0966991	1.9448	0.170048	2.5389	1.78245	-0.257226	-0.317227	-0.515433	-0.723051	-0.638894	-0.634116	-0.571323	-0.604925	-0.627451	-0.479717	-0.530057
520	chr1-116946882-116947782	60	chr1-116946882-116947782	901	0	ENSG00000134247	1	PTGFRN	intron	0	19277	0	-0.440075	-0.0966991	1.9448	0.170048	2.5389	1.78245	-0.257226	-0.317227	-0.515433	-0.723051	-0.638894	-0.634116	-0.571323	-0.604925	-0.627451	-0.479717	-0.530057
521	chr1-117061909-117062272	60	chr1-117061909-117062272	364	0	ENSG00000116830	1	TTF2	intron	0	1546	0	-0.440075	-0.0966991	1.9448	0.170048	2.5389	1.78245	-0.257226	-0.317227	-0.515433	-0.723051	-0.638894	-0.634116	-0.571323	-0.604925	-0.627451	-0.479717	-0.530057
522	chr1-117215823-117217065	60	chr1-117215823-117217065	1243	0		0		intergenic	0	4862	0	-0.440075	-0.0966991	1.9448	0.170048	2.5389	1.78245	-0.257226	-0.317227	-0.515433	-0.723051	-0.638894	-0.634116	-0.571323	-0.604925	-0.627451	-0.479717	-0.530057
523	chr1-117244301-117245674	60	chr1-117244301-117245674	1374	0		0		intergenic	0	33340	0	-0.440075	-0.0966991	1.9448	0.170048	2.5389	1.78245	-0.257226	-0.317227	-0.515433	-0.723051	-0.638894	-0.634116	-0.571323	-0.604925	-0.627451	-0.479717	-0.530057
524	chr1-117609419-117610177	63	chr1-117609419-117610177	759	0	ENSG00000183508	1	FAM46C	intron	0	3484	0	-0.590535	0.719656	-0.448768	-0.904484	-0.819359	-0.863954	-0.747354	0.0102348	1.24576	0.758231	2.62918	0.131191	1.51028	-0.771074	-0.802672	-0.567791	-0.488543
525	chr1-117695671-117697122	63	chr1-117695671-117697122	1452	0		0		intergenic	0	89736	0	-0.590535	0.719656	-0.448768	-0.904484	-0.819359	-0.863954	-0.747354	0.0102348	1.24576	0.758231	2.62918	0.131191	1.51028	-0.771074	-0.802672	-0.567791	-0.488543
526	chr1-117698300-117699297	63	chr1-117698300-117699297	998	0		0		intergenic	0	92365	0	-0.590535	0.719656	-0.448768	-0.904484	-0.819359	-0.863954	-0.747354	0.0102348	1.24576	0.758231	2.62918	0.131191	1.51028	-0.771074	-0.802672	-0.567791	-0.488543
527	chr1-117708456-117709712	63	chr1-117708456-117709712	1257	0		0		intergenic	0	102521	0	-0.590535	0.719656	-0.448768	-0.904484	-0.819359	-0.863954	-0.747354	0.0102348	1.24576	0.758231	2.62918	0.131191	1.51028	-0.771074	-0.802672	-0.567791	-0.488543
528	chr1-117780330-117781579	63	chr1-117780330-117781579	1250	0		0		intergenic	0	106153	0	-0.590535	0.719656	-0.448768	-0.904484	-0.819359	-0.863954	-0.747354	0.0102348	1.24576	0.758231	2.62918	0.131191	1.51028	-0.771074	-0.802672	-0.567791	-0.488543
529	chr1-117787522-117788547	63	chr1-117787522-117788547	1026	0		0		intergenic	0	99185	0	-0.590535	0.719656	-0.448768	-0.904484	-0.819359	-0.863954	-0.747354	0.0102348	1.24576	0.758231	2.62918	0.131191	1.51028	-0.771074	-0.802672	-0.567791	-0.488543
530	chr1-117793953-117794480	63	chr1-117793953-117794480	528	0		0		intergenic	0	93252	0	-0.590535	0.719656	-0.448768	-0.904484	-0.819359	-0.863954	-0.747354	0.0102348	1.24576	0.758231	2.62918	0.131191	1.51028	-0.771074	-0.802672	-0.567791	-0.488543
531	chr1-117814597-117815737	63	chr1-117814597-117815737	1141	0		0		intergenic	0	71995	0	-0.590535	0.719656	-0.448768	-0.904484	-0.819359	-0.863954	-0.747354	0.0102348	1.24576	0.758231	2.62918	0.131191	1.51028	-0.771074	-0.802672	-0.567791	-0.488543
532	chr1-117826473-117827084	63	chr1-117826473-117827084	612	0		0		intergenic	0	60648	0	-0.590535	0.719656	-0.448768	-0.904484	-0.819359	-0.863954	-0.747354	0.0102348	1.24576	0.758231	2.62918	0.131191	1.51028	-0.771074	-0.802672	-0.567791	-0.488543
533	chr1-117827849-117828623	63	chr1-117827849-117828623	775	0		0		intergenic	0	59109	0	-0.590535	0.719656	-0.448768	-0.904484	-0.819359	-0.863954	-0.747354	0.0102348	1.24576	0.758231	2.62918	0.131191	1.51028	-0.771074	-0.802672	-0.567791	-0.488543
534	chr1-117967365-117968762	63	chr1-117967365-117968762	1398	0	ENSG00000155761	1	SPAG17	promoter	1	612	0	-0.590535	0.719656	-0.448768	-0.904484	-0.819359	-0.863954	-0.747354	0.0102348	1.24576	0.758231	2.62918	0.131191	1.51028	-0.771074	-0.802672	-0.567791	-0.488543
535	chr1-118136255-118137160	63	chr1-118136255-118137160	906	0	ENSG00000155761	1	SPAG17	intron	0	48062	0	-0.590535	0.719656	-0.448768	-0.904484	-0.819359	-0.863954	-0.747354	0.0102348	1.24576	0.758231	2.62918	0.131191	1.51028	-0.771074	-0.802672	-0.567791	-0.488543
536	chr1-119225048-119226035	64	chr1-119225048-119226035	988	0		0		intergenic	0	84376	0	-0.670406	0.651298	-0.253299	-0.871397	-0.329024	-0.575824	-0.694407	-0.0930318	1.82363	-0.213273	2.89536	0.299951	0.771896	-0.783119	-0.799888	-0.515885	-0.642584
537	chr1-119226275-119226747	64	chr1-119226275-119226747	473	0		0		intergenic	0	85603	0	-0.670406	0.651298	-0.253299	-0.871397	-0.329024	-0.575824	-0.694407	-0.0930318	1.82363	-0.213273	2.89536	0.299951	0.771896	-0.783119	-0.799888	-0.515885	-0.642584
538	chr1-119279409-119280523	64	chr1-119279409-119280523	1115	0		0		intergenic	0	88255	0	-0.670406	0.651298	-0.253299	-0.871397	-0.329024	-0.575824	-0.694407	-0.0930318	1.82363	-0.213273	2.89536	0.299951	0.771896	-0.783119	-0.799888	-0.515885	-0.642584
539	chr1-119286335-119287130	66	chr1-119286335-119287130	796	0		0		intergenic	0	81648	0	-0.397173	0.521768	0.601229	1.5255	1.80645	1.99083	0.807764	-0.212434	-0.628107	-1.04787	-1.02416	-0.906523	-0.794622	-0.90065	-0.935538	0.10776	-0.514223
540	chr1-119288750-119289291	66	chr1-119288750-119289291	542	0		0		intergenic	0	79487	0	-0.397173	0.521768	0.601229	1.5255	1.80645	1.99083	0.807764	-0.212434	-0.628107	-1.04787	-1.02416	-0.906523	-0.794622	-0.90065	-0.935538	0.10776	-0.514223
541	chr1-119332363-119333386	66	chr1-119332363-119333386	1024	0		0		intergenic	0	35392	0	-0.397173	0.521768	0.601229	1.5255	1.80645	1.99083	0.807764	-0.212434	-0.628107	-1.04787	-1.02416	-0.906523	-0.794622	-0.90065	-0.935538	0.10776	-0.514223
542	chr1-119475653-119476370	66	chr1-119475653-119476370	718	0		0		intergenic	0	30827	0	-0.397173	0.521768	0.601229	1.5255	1.80645	1.99083	0.807764	-0.212434	-0.628107	-1.04787	-1.02416	-0.906523	-0.794622	-0.90065	-0.935538	0.10776	-0.514223
543	chr1-119516860-119518294	66	chr1-119516860-119518294	1435	0		0		intergenic	0	9541	0	-0.397173	0.521768	0.601229	1.5255	1.80645	1.99083	0.807764	-0.212434	-0.628107	-1.04787	-1.02416	-0.906523	-0.794622	-0.90065	-0.935538	0.10776	-0.514223
544	chr1-119549501-119549997	66	chr1-119549501-119549997	497	0		0		intergenic	0	42182	0	-0.397173	0.521768	0.601229	1.5255	1.80645	1.99083	0.807764	-0.212434	-0.628107	-1.04787	-1.02416	-0.906523	-0.794622	-0.90065	-0.935538	0.10776	-0.514223
545	chr1-119558071-119558549	66	chr1-119558071-119558549	479	0		0		intergenic	0	50752	0	-0.397173	0.521768	0.601229	1.5255	1.80645	1.99083	0.807764	-0.212434	-0.628107	-1.04787	-1.02416	-0.906523	-0.794622	-0.90065	-0.935538	0.10776	-0.514223
546	chr1-119582660-119583165	66	chr1-119582660-119583165	506	0		0		intergenic	0	64607	0	-0.397173	0.521768	0.601229	1.5255	1.80645	1.99083	0.807764	-0.212434	-0.628107	-1.04787	-1.02416	-0.906523	-0.794622	-0.90065	-0.935538	0.10776	-0.514223
547	chr1-119611289-119612103	66	chr1-119611289-119612103	815	0		0		intergenic	0	35669	0	-0.397173	0.521768	0.601229	1.5255	1.80645	1.99083	0.807764	-0.212434	-0.628107	-1.04787	-1.02416	-0.906523	-0.794622	-0.90065	-0.935538	0.10776	-0.514223
548	chr1-119703391-119704326	66	chr1-119703391-119704326	936	0	ENSG00000092621	1	PHGDH	intron	0	7557	0	-0.397173	0.521768	0.601229	1.5255	1.80645	1.99083	0.807764	-0.212434	-0.628107	-1.04787	-1.02416	-0.906523	-0.794622	-0.90065	-0.935538	0.10776	-0.514223
549	chr1-119736940-119737865	66	chr1-119736940-119737865	926	1	ENSG00000092621	1	PHGDH	exon	1	1596	0	-0.397173	0.521768	0.601229	1.5255	1.80645	1.99083	0.807764	-0.212434	-0.628107	-1.04787	-1.02416	-0.906523	-0.794622	-0.90065	-0.935538	0.10776	-0.514223
550	chr1-119336823-119337559	67	chr1-119336823-119337559	737	0		0		intergenic	0	31219	0	-0.781912	-0.721044	-0.780634	0.916862	-0.154946	0.88671	0.111666	2.90592	1.05229	0.761076	-0.00698484	-0.390063	-0.181735	-0.975552	-0.913482	-0.850229	-0.877939
551	chr1-119372379-119373300	67	chr1-119372379-119373300	922	0	ENSG00000116882	1	HAO2	intron	0	3540	0	-0.781912	-0.721044	-0.780634	0.916862	-0.154946	0.88671	0.111666	2.90592	1.05229	0.761076	-0.00698484	-0.390063	-0.181735	-0.975552	-0.913482	-0.850229	-0.877939
552	chr1-119654811-119655500	67	chr1-119654811-119655500	690	0		0		intergenic	0	4297	0	-0.781912	-0.721044	-0.780634	0.916862	-0.154946	0.88671	0.111666	2.90592	1.05229	0.761076	-0.00698484	-0.390063	-0.181735	-0.975552	-0.913482	-0.850229	-0.877939
553	chr1-119747067-119748246	67	chr1-119747067-119748246	1180	1	ENSG00000134240	1	HMGCS2	exon	0	7604	0	-0.781912	-0.721044	-0.780634	0.916862	-0.154946	0.88671	0.111666	2.90592	1.05229	0.761076	-0.00698484	-0.390063	-0.181735	-0.975552	-0.913482	-0.850229	-0.877939
554	chr1-119965798-119966952	67	chr1-119965798-119966952	1155	1	ENSG00000134250	1	NOTCH2	exon	0	28334	0	-0.781912	-0.721044	-0.780634	0.916862	-0.154946	0.88671	0.111666	2.90592	1.05229	0.761076	-0.00698484	-0.390063	-0.181735	-0.975552	-0.913482	-0.850229	-0.877939
555	chr1-119550339-119550690	69	chr1-119550339-119550690	352	0		0		intergenic	0	43020	0	-0.769108	0.472859	-0.323461	-0.506904	-0.446833	-0.695899	-0.373365	-0.0859978	1.8928	-0.370471	2.35417	-0.166959	1.73432	-0.947357	-1.03227	0.112448	-0.847968
556	chr1-119740588-119740941	69	chr1-119740588-119740941	354	0	ENSG00000092621	1	PHGDH	intron	0	1125	0	-0.769108	0.472859	-0.323461	-0.506904	-0.446833	-0.695899	-0.373365	-0.0859978	1.8928	-0.370471	2.35417	-0.166959	1.73432	-0.947357	-1.03227	0.112448	-0.847968
557	chr1-119779729-119780754	69	chr1-119779729-119780754	1026	0		0		intergenic	0	10823	0	-0.769108	0.472859	-0.323461	-0.506904	-0.446833	-0.695899	-0.373365	-0.0859978	1.8928	-0.370471	2.35417	-0.166959	1.73432	-0.947357	-1.03227	0.112448	-0.847968
558	chr1-119782309-119783673	69	chr1-119782309-119783673	1365	0		0		intergenic	0	13403	0	-0.769108	0.472859	-0.323461	-0.506904	-0.446833	-0.695899	-0.373365	-0.0859978	1.8928	-0.370471	2.35417	-0.166959	1.73432	-0.947357	-1.03227	0.112448	-0.847968
559	chr1-119784116-119784702	69	chr1-119784116-119784702	587	0		0		intergenic	0	15210	0	-0.769108	0.472859	-0.323461	-0.506904	-0.446833	-0.695899	-0.373365	-0.0859978	1.8928	-0.370471	2.35417	-0.166959	1.73432	-0.947357	-1.03227	0.112448	-0.847968
560	chr1-119828937-119829847	69	chr1-119828937-119829847	911	0		0		intergenic	0	17276	0	-0.769108	0.472859	-0.323461	-0.506904	-0.446833	-0.695899	-0.373365	-0.0859978	1.8928	-0.370471	2.35417	-0.166959	1.73432	-0.947357	-1.03227	0.112448	-0.847968
561	chr1-119977860-119978547	69	chr1-119977860-119978547	688	0	ENSG00000134250	1	NOTCH2	intron	0	40396	0	-0.769108	0.472859	-0.323461	-0.506904	-0.446833	-0.695899	-0.373365	-0.0859978	1.8928	-0.370471	2.35417	-0.166959	1.73432	-0.947357	-1.03227	0.112448	-0.847968
562	chr1-119981579-119982883	69	chr1-119981579-119982883	1305	0	ENSG00000134250	1	NOTCH2	intron	0	44115	0	-0.769108	0.472859	-0.323461	-0.506904	-0.446833	-0.695899	-0.373365	-0.0859978	1.8928	-0.370471	2.35417	-0.166959	1.73432	-0.947357	-1.03227	0.112448	-0.847968
563	chr1-120844000-120845187	71	chr1-120844000-120845187	1188	0		0		intergenic	0	30093	0	-1.85304	-0.366424	0.575067	1.38229	1.26885	1.09982	1.65759	-0.104033	-0.517844	-0.13082	-0.0074783	0.548764	-0.679131	-0.153246	-2.06828	-0.166419	-0.485666
564	chr1-120849990-120851448	71	chr1-120849990-120851448	1459	0		0		intergenic	0	36083	0	-1.85304	-0.366424	0.575067	1.38229	1.26885	1.09982	1.65759	-0.104033	-0.517844	-0.13082	-0.0074783	0.548764	-0.679131	-0.153246	-2.06828	-0.166419	-0.485666
565	chr1-120941931-120942838	71	chr1-120941931-120942838	908	0		0		intergenic	0	27692	0	-1.85304	-0.366424	0.575067	1.38229	1.26885	1.09982	1.65759	-0.104033	-0.517844	-0.13082	-0.0074783	0.548764	-0.679131	-0.153246	-2.06828	-0.166419	-0.485666
566	chr1-1212610-1213625	543	chr1-1212610-1213625	1016	1	ENSG00000186827	1	TNFRSF4	exon	1	0	0	0.0659883	-0.206957	-0.200687	-0.590553	-0.584305	-1.31689	0.330915	-1.14316	-0.473124	2.71997	0.301581	-0.888305	-0.00380029	0.45733	-0.560328	0.0823826	2.00994
567	chr1-1213638-1214191	543	chr1-1213638-1214191	554	1	ENSG00000186827	1	TNFRSF4	exon	1	0	0	0.0659883	-0.206957	-0.200687	-0.590553	-0.584305	-1.31689	0.330915	-1.14316	-0.473124	2.71997	0.301581	-0.888305	-0.00380029	0.45733	-0.560328	0.0823826	2.00994
568	chr1-1214947-1215455	543	chr1-1214947-1215455	509	0	ENSG00000186827	0	TNFRSF4	promoter	1	808	0	0.0659883	-0.206957	-0.200687	-0.590553	-0.584305	-1.31689	0.330915	-1.14316	-0.473124	2.71997	0.301581	-0.888305	-0.00380029	0.45733	-0.560328	0.0823826	2.00994
569	chr1-1260599-1261474	543	chr1-1260599-1261474	876	0	ENSG00000160087	1	UBE2J2	intron	0	2094	0	0.0659883	-0.206957	-0.200687	-0.590553	-0.584305	-1.31689	0.330915	-1.14316	-0.473124	2.71997	0.301581	-0.888305	-0.00380029	0.45733	-0.560328	0.0823826	2.00994
570	chr1-1422506-1423159	543	chr1-1422506-1423159	654	0	ENSG00000235098	0	ANKRD65	promoter	1	736	0	0.0659883	-0.206957	-0.200687	-0.590553	-0.584305	-1.31689	0.330915	-1.14316	-0.473124	2.71997	0.301581	-0.888305	-0.00380029	0.45733	-0.560328	0.0823826	2.00994
571	chr1-1606958-1607422	543	chr1-1606958-1607422	465	0		0		intergenic	0	6861	0	0.0659883	-0.206957	-0.200687	-0.590553	-0.584305	-1.31689	0.330915	-1.14316	-0.473124	2.71997	0.301581	-0.888305	-0.00380029	0.45733	-0.560328	0.0823826	2.00994
572	chr1-1646327-1646867	543	chr1-1646327-1646867	541	0	ENSG00000248333	1	CDK11B	intron	0	12086	0	0.0659883	-0.206957	-0.200687	-0.590553	-0.584305	-1.31689	0.330915	-1.14316	-0.473124	2.71997	0.301581	-0.888305	-0.00380029	0.45733	-0.560328	0.0823826	2.00994
573	chr1-1779927-1780681	543	chr1-1779927-1780681	755	1	ENSG00000008130	1	NADK	exon	1	0	0	0.0659883	-0.206957	-0.200687	-0.590553	-0.584305	-1.31689	0.330915	-1.14316	-0.473124	2.71997	0.301581	-0.888305	-0.00380029	0.45733	-0.560328	0.0823826	2.00994
574	chr1-1857112-1857399	543	chr1-1857112-1857399	288	0	ENSG00000078369	1	GNB1	intron	0	24826	0	0.0659883	-0.206957	-0.200687	-0.590553	-0.584305	-1.31689	0.330915	-1.14316	-0.473124	2.71997	0.301581	-0.888305	-0.00380029	0.45733	-0.560328	0.0823826	2.00994
575	chr1-1858356-1859704	543	chr1-1858356-1859704	1349	0	ENSG00000078369	1	GNB1	intron	0	26070	0	0.0659883	-0.206957	-0.200687	-0.590553	-0.584305	-1.31689	0.330915	-1.14316	-0.473124	2.71997	0.301581	-0.888305	-0.00380029	0.45733	-0.560328	0.0823826	2.00994
576	chr1-1946360-1947091	543	chr1-1946360-1947091	732	1	ENSG00000142609	1	CFAP74	exon	0	13014	0	0.0659883	-0.206957	-0.200687	-0.590553	-0.584305	-1.31689	0.330915	-1.14316	-0.473124	2.71997	0.301581	-0.888305	-0.00380029	0.45733	-0.560328	0.0823826	2.00994
577	chr1-1996036-1996731	543	chr1-1996036-1996731	696	0	ENSG00000142609	1	CFAP74	intron	0	5106	0	0.0659883	-0.206957	-0.200687	-0.590553	-0.584305	-1.31689	0.330915	-1.14316	-0.473124	2.71997	0.301581	-0.888305	-0.00380029	0.45733	-0.560328	0.0823826	2.00994
578	chr1-2014769-2015309	543	chr1-2014769-2015309	541	0		0		intergenic	0	4014	0	0.0659883	-0.206957	-0.200687	-0.590553	-0.584305	-1.31689	0.330915	-1.14316	-0.473124	2.71997	0.301581	-0.888305	-0.00380029	0.45733	-0.560328	0.0823826	2.00994
579	chr1-2073021-2074310	543	chr1-2073021-2074310	1290	1	ENSG00000067606	1	PRKCZ	exon	1	0	0	0.0659883	-0.206957	-0.200687	-0.590553	-0.584305	-1.31689	0.330915	-1.14316	-0.473124	2.71997	0.301581	-0.888305	-0.00380029	0.45733	-0.560328	0.0823826	2.00994
580	chr1-2087922-2088954	543	chr1-2087922-2088954	1033	0	ENSG00000067606	1	PRKCZ	intron	0	5673	0	0.0659883	-0.206957	-0.200687	-0.590553	-0.584305	-1.31689	0.330915	-1.14316	-0.473124	2.71997	0.301581	-0.888305	-0.00380029	0.45733	-0.560328	0.0823826	2.00994
581	chr1-2108462-2108933	543	chr1-2108462-2108933	472	0	ENSG00000067606	1	PRKCZ	intron	0	2720	0	0.0659883	-0.206957	-0.200687	-0.590553	-0.584305	-1.31689	0.330915	-1.14316	-0.473124	2.71997	0.301581	-0.888305	-0.00380029	0.45733	-0.560328	0.0823826	2.00994
582	chr1-2134969-2135956	543	chr1-2134969-2135956	988	1	ENSG00000067606	1	PRKCZ	exon	1	0	0	0.0659883	-0.206957	-0.200687	-0.590553	-0.584305	-1.31689	0.330915	-1.14316	-0.473124	2.71997	0.301581	-0.888305	-0.00380029	0.45733	-0.560328	0.0823826	2.00994
583	chr1-2148543-2149094	543	chr1-2148543-2149094	552	1	ENSG00000067606	1	PRKCZ	exon	0	3155	0	0.0659883	-0.206957	-0.200687	-0.590553	-0.584305	-1.31689	0.330915	-1.14316	-0.473124	2.71997	0.301581	-0.888305	-0.00380029	0.45733	-0.560328	0.0823826	2.00994
584	chr1-2173786-2174973	543	chr1-2173786-2174973	1188	1	ENSG00000067606	1	PRKCZ	exon	0	4810	0	0.0659883	-0.206957	-0.200687	-0.590553	-0.584305	-1.31689	0.330915	-1.14316	-0.473124	2.71997	0.301581	-0.888305	-0.00380029	0.45733	-0.560328	0.0823826	2.00994
585	chr1-2175498-2176905	543	chr1-2175498-2176905	1408	0	ENSG00000067606	1	PRKCZ	intron	0	6522	0	0.0659883	-0.206957	-0.200687	-0.590553	-0.584305	-1.31689	0.330915	-1.14316	-0.473124	2.71997	0.301581	-0.888305	-0.00380029	0.45733	-0.560328	0.0823826	2.00994
586	chr1-2192181-2192598	543	chr1-2192181-2192598	418	1	ENSG00000162585	1	FAAP20	exon	0	1509	0	0.0659883	-0.206957	-0.200687	-0.590553	-0.584305	-1.31689	0.330915	-1.14316	-0.473124	2.71997	0.301581	-0.888305	-0.00380029	0.45733	-0.560328	0.0823826	2.00994
587	chr1-2194274-2195512	543	chr1-2194274-2195512	1239	1	ENSG00000162585	1	FAAP20	exon	1	0	0	0.0659883	-0.206957	-0.200687	-0.590553	-0.584305	-1.31689	0.330915	-1.14316	-0.473124	2.71997	0.301581	-0.888305	-0.00380029	0.45733	-0.560328	0.0823826	2.00994
588	chr1-2198689-2199759	543	chr1-2198689-2199759	1071	1	ENSG00000162585	1	FAAP20	exon	0	147	0	0.0659883	-0.206957	-0.200687	-0.590553	-0.584305	-1.31689	0.330915	-1.14316	-0.473124	2.71997	0.301581	-0.888305	-0.00380029	0.45733	-0.560328	0.0823826	2.00994
589	chr1-2207188-2208010	543	chr1-2207188-2208010	823	1	ENSG00000162585	1	FAAP20	exon	1	0	0	0.0659883	-0.206957	-0.200687	-0.590553	-0.584305	-1.31689	0.330915	-1.14316	-0.473124	2.71997	0.301581	-0.888305	-0.00380029	0.45733	-0.560328	0.0823826	2.00994
590	chr1-2208261-2208542	543	chr1-2208261-2208542	282	0	ENSG00000162585	1	FAAP20	promoter	1	527	0	0.0659883	-0.206957	-0.200687	-0.590553	-0.584305	-1.31689	0.330915	-1.14316	-0.473124	2.71997	0.301581	-0.888305	-0.00380029	0.45733	-0.560328	0.0823826	2.00994
591	chr1-2230328-2230891	543	chr1-2230328-2230891	564	0	ENSG00000157933	1	SKI	promoter	1	1587	0	0.0659883	-0.206957	-0.200687	-0.590553	-0.584305	-1.31689	0.330915	-1.14316	-0.473124	2.71997	0.301581	-0.888305	-0.00380029	0.45733	-0.560328	0.0823826	2.00994
592	chr1-2231565-2232198	543	chr1-2231565-2232198	634	0	ENSG00000157933	1	SKI	promoter	1	280	0	0.0659883	-0.206957	-0.200687	-0.590553	-0.584305	-1.31689	0.330915	-1.14316	-0.473124	2.71997	0.301581	-0.888305	-0.00380029	0.45733	-0.560328	0.0823826	2.00994
593	chr1-2234277-2234934	543	chr1-2234277-2234934	658	0	ENSG00000157933	1	SKI	intron	0	1797	0	0.0659883	-0.206957	-0.200687	-0.590553	-0.584305	-1.31689	0.330915	-1.14316	-0.473124	2.71997	0.301581	-0.888305	-0.00380029	0.45733	-0.560328	0.0823826	2.00994
594	chr1-2246213-2247008	543	chr1-2246213-2247008	796	0	ENSG00000157933	1	SKI	promoter	1	987	0	0.0659883	-0.206957	-0.200687	-0.590553	-0.584305	-1.31689	0.330915	-1.14316	-0.473124	2.71997	0.301581	-0.888305	-0.00380029	0.45733	-0.560328	0.0823826	2.00994
595	chr1-2255144-2256448	543	chr1-2255144-2256448	1305	0	ENSG00000157933	1	SKI	intron	0	7147	0	0.0659883	-0.206957	-0.200687	-0.590553	-0.584305	-1.31689	0.330915	-1.14316	-0.473124	2.71997	0.301581	-0.888305	-0.00380029	0.45733	-0.560328	0.0823826	2.00994
596	chr1-2273811-2274733	543	chr1-2273811-2274733	923	0	ENSG00000157933	1	SKI	intron	0	25814	0	0.0659883	-0.206957	-0.200687	-0.590553	-0.584305	-1.31689	0.330915	-1.14316	-0.473124	2.71997	0.301581	-0.888305	-0.00380029	0.45733	-0.560328	0.0823826	2.00994
597	chr1-2278541-2280018	543	chr1-2278541-2280018	1478	0	ENSG00000157933	1	SKI	intron	0	23627	0	0.0659883	-0.206957	-0.200687	-0.590553	-0.584305	-1.31689	0.330915	-1.14316	-0.473124	2.71997	0.301581	-0.888305	-0.00380029	0.45733	-0.560328	0.0823826	2.00994
598	chr1-2290010-2291483	543	chr1-2290010-2291483	1474	0	ENSG00000157933	1	SKI	intron	0	12162	0	0.0659883	-0.206957	-0.200687	-0.590553	-0.584305	-1.31689	0.330915	-1.14316	-0.473124	2.71997	0.301581	-0.888305	-0.00380029	0.45733	-0.560328	0.0823826	2.00994
599	chr1-2299217-2299637	543	chr1-2299217-2299637	421	0	ENSG00000157933	1	SKI	intron	0	4008	0	0.0659883	-0.206957	-0.200687	-0.590553	-0.584305	-1.31689	0.330915	-1.14316	-0.473124	2.71997	0.301581	-0.888305	-0.00380029	0.45733	-0.560328	0.0823826	2.00994
600	chr1-2304683-2305374	543	chr1-2304683-2305374	692	0	ENSG00000157933	1	SKI	intron	0	1036	0	0.0659883	-0.206957	-0.200687	-0.590553	-0.584305	-1.31689	0.330915	-1.14316	-0.473124	2.71997	0.301581	-0.888305	-0.00380029	0.45733	-0.560328	0.0823826	2.00994
601	chr1-2312260-2313432	543	chr1-2312260-2313432	1173	0		0		intergenic	0	8613	0	0.0659883	-0.206957	-0.200687	-0.590553	-0.584305	-1.31689	0.330915	-1.14316	-0.473124	2.71997	0.301581	-0.888305	-0.00380029	0.45733	-0.560328	0.0823826	2.00994
602	chr1-2320043-2320326	543	chr1-2320043-2320326	284	0		0		intergenic	0	16396	0	0.0659883	-0.206957	-0.200687	-0.590553	-0.584305	-1.31689	0.330915	-1.14316	-0.473124	2.71997	0.301581	-0.888305	-0.00380029	0.45733	-0.560328	0.0823826	2.00994
603	chr1-2320788-2321165	543	chr1-2320788-2321165	378	0		0		intergenic	0	17141	0	0.0659883	-0.206957	-0.200687	-0.590553	-0.584305	-1.31689	0.330915	-1.14316	-0.473124	2.71997	0.301581	-0.888305	-0.00380029	0.45733	-0.560328	0.0823826	2.00994
604	chr1-2354624-2355547	543	chr1-2354624-2355547	924	1	ENSG00000116151	1	MORN1	exon	0	20330	0	0.0659883	-0.206957	-0.200687	-0.590553	-0.584305	-1.31689	0.330915	-1.14316	-0.473124	2.71997	0.301581	-0.888305	-0.00380029	0.45733	-0.560328	0.0823826	2.00994
605	chr1-2360532-2361342	543	chr1-2360532-2361342	811	0	ENSG00000116151	1	MORN1	intron	0	14535	0	0.0659883	-0.206957	-0.200687	-0.590553	-0.584305	-1.31689	0.330915	-1.14316	-0.473124	2.71997	0.301581	-0.888305	-0.00380029	0.45733	-0.560328	0.0823826	2.00994
606	chr1-2415829-2416636	543	chr1-2415829-2416636	808	0		0		intergenic	0	2031	0	0.0659883	-0.206957	-0.200687	-0.590553	-0.584305	-1.31689	0.330915	-1.14316	-0.473124	2.71997	0.301581	-0.888305	-0.00380029	0.45733	-0.560328	0.0823826	2.00994
607	chr1-2451871-2452731	543	chr1-2451871-2452731	861	0	ENSG00000149527	1	PLCH2	intron	0	14727	0	0.0659883	-0.206957	-0.200687	-0.590553	-0.584305	-1.31689	0.330915	-1.14316	-0.473124	2.71997	0.301581	-0.888305	-0.00380029	0.45733	-0.560328	0.0823826	2.00994
608	chr1-2459682-2460323	543	chr1-2459682-2460323	642	0	ENSG00000149527	1	PLCH2	intron	0	7135	0	0.0659883	-0.206957	-0.200687	-0.590553	-0.584305	-1.31689	0.330915	-1.14316	-0.473124	2.71997	0.301581	-0.888305	-0.00380029	0.45733	-0.560328	0.0823826	2.00994
609	chr1-2462804-2463171	543	chr1-2462804-2463171	368	0	ENSG00000149527	1	PLCH2	intron	0	4287	0	0.0659883	-0.206957	-0.200687	-0.590553	-0.584305	-1.31689	0.330915	-1.14316	-0.473124	2.71997	0.301581	-0.888305	-0.00380029	0.45733	-0.560328	0.0823826	2.00994
610	chr1-2463357-2463733	543	chr1-2463357-2463733	377	0	ENSG00000149527	1	PLCH2	intron	0	3725	0	0.0659883	-0.206957	-0.200687	-0.590553	-0.584305	-1.31689	0.330915	-1.14316	-0.473124	2.71997	0.301581	-0.888305	-0.00380029	0.45733	-0.560328	0.0823826	2.00994
611	chr1-2480652-2481368	543	chr1-2480652-2481368	717	0	ENSG00000149527	1	PLCH2	intron	0	763	0	0.0659883	-0.206957	-0.200687	-0.590553	-0.584305	-1.31689	0.330915	-1.14316	-0.473124	2.71997	0.301581	-0.888305	-0.00380029	0.45733	-0.560328	0.0823826	2.00994
612	chr1-2481752-2483142	543	chr1-2481752-2483142	1391	0	ENSG00000149527	1	PLCH2	intron	0	1863	0	0.0659883	-0.206957	-0.200687	-0.590553	-0.584305	-1.31689	0.330915	-1.14316	-0.473124	2.71997	0.301581	-0.888305	-0.00380029	0.45733	-0.560328	0.0823826	2.00994
613	chr1-2493097-2494579	543	chr1-2493097-2494579	1483	0	ENSG00000149527	1	PLCH2	intron	0	3202	0	0.0659883	-0.206957	-0.200687	-0.590553	-0.584305	-1.31689	0.330915	-1.14316	-0.473124	2.71997	0.301581	-0.888305	-0.00380029	0.45733	-0.560328	0.0823826	2.00994
614	chr1-2503504-2504216	543	chr1-2503504-2504216	713	1	ENSG00000149527	1	PLCH2	exon	0	4856	0	0.0659883	-0.206957	-0.200687	-0.590553	-0.584305	-1.31689	0.330915	-1.14316	-0.473124	2.71997	0.301581	-0.888305	-0.00380029	0.45733	-0.560328	0.0823826	2.00994
615	chr1-2504473-2505438	543	chr1-2504473-2505438	966	1	ENSG00000149527	1	PLCH2	exon	0	5825	0	0.0659883	-0.206957	-0.200687	-0.590553	-0.584305	-1.31689	0.330915	-1.14316	-0.473124	2.71997	0.301581	-0.888305	-0.00380029	0.45733	-0.560328	0.0823826	2.00994
616	chr1-2527923-2528334	543	chr1-2527923-2528334	412	0	ENSG00000157881	0	PANK4	promoter	1	1294	0	0.0659883	-0.206957	-0.200687	-0.590553	-0.584305	-1.31689	0.330915	-1.14316	-0.473124	2.71997	0.301581	-0.888305	-0.00380029	0.45733	-0.560328	0.0823826	2.00994
617	chr1-2528984-2529719	543	chr1-2528984-2529719	736	1	ENSG00000197921	1	HES5	exon	0	525	0	0.0659883	-0.206957	-0.200687	-0.590553	-0.584305	-1.31689	0.330915	-1.14316	-0.473124	2.71997	0.301581	-0.888305	-0.00380029	0.45733	-0.560328	0.0823826	2.00994
618	chr1-2530191-2530682	543	chr1-2530191-2530682	492	1	ENSG00000197921	1	HES5	exon	1	0	0	0.0659883	-0.206957	-0.200687	-0.590553	-0.584305	-1.31689	0.330915	-1.14316	-0.473124	2.71997	0.301581	-0.888305	-0.00380029	0.45733	-0.560328	0.0823826	2.00994
619	chr1-2532622-2533122	543	chr1-2532622-2533122	501	0		0		intergenic	0	2376	0	0.0659883	-0.206957	-0.200687	-0.590553	-0.584305	-1.31689	0.330915	-1.14316	-0.473124	2.71997	0.301581	-0.888305	-0.00380029	0.45733	-0.560328	0.0823826	2.00994
620	chr1-2540609-2541217	543	chr1-2540609-2541217	609	0		0		intergenic	0	10363	0	0.0659883	-0.206957	-0.200687	-0.590553	-0.584305	-1.31689	0.330915	-1.14316	-0.473124	2.71997	0.301581	-0.888305	-0.00380029	0.45733	-0.560328	0.0823826	2.00994
621	chr1-2543442-2544081	543	chr1-2543442-2544081	640	0		0		intergenic	0	11557	0	0.0659883	-0.206957	-0.200687	-0.590553	-0.584305	-1.31689	0.330915	-1.14316	-0.473124	2.71997	0.301581	-0.888305	-0.00380029	0.45733	-0.560328	0.0823826	2.00994
622	chr1-2544199-2544509	543	chr1-2544199-2544509	311	0		0		intergenic	0	11129	0	0.0659883	-0.206957	-0.200687	-0.590553	-0.584305	-1.31689	0.330915	-1.14316	-0.473124	2.71997	0.301581	-0.888305	-0.00380029	0.45733	-0.560328	0.0823826	2.00994
623	chr1-2544716-2545170	543	chr1-2544716-2545170	455	0		0		intergenic	0	10468	0	0.0659883	-0.206957	-0.200687	-0.590553	-0.584305	-1.31689	0.330915	-1.14316	-0.473124	2.71997	0.301581	-0.888305	-0.00380029	0.45733	-0.560328	0.0823826	2.00994
624	chr1-2547867-2549059	543	chr1-2547867-2549059	1193	0		0		intergenic	0	6579	0	0.0659883	-0.206957	-0.200687	-0.590553	-0.584305	-1.31689	0.330915	-1.14316	-0.473124	2.71997	0.301581	-0.888305	-0.00380029	0.45733	-0.560328	0.0823826	2.00994
625	chr1-2575635-2576134	543	chr1-2575635-2576134	500	0		0		intergenic	0	10356	0	0.0659883	-0.206957	-0.200687	-0.590553	-0.584305	-1.31689	0.330915	-1.14316	-0.473124	2.71997	0.301581	-0.888305	-0.00380029	0.45733	-0.560328	0.0823826	2.00994
626	chr1-2576418-2576886	543	chr1-2576418-2576886	469	0		0		intergenic	0	9604	0	0.0659883	-0.206957	-0.200687	-0.590553	-0.584305	-1.31689	0.330915	-1.14316	-0.473124	2.71997	0.301581	-0.888305	-0.00380029	0.45733	-0.560328	0.0823826	2.00994
627	chr1-2577833-2578850	543	chr1-2577833-2578850	1018	0		0		intergenic	0	7640	0	0.0659883	-0.206957	-0.200687	-0.590553	-0.584305	-1.31689	0.330915	-1.14316	-0.473124	2.71997	0.301581	-0.888305	-0.00380029	0.45733	-0.560328	0.0823826	2.00994
628	chr1-2607079-2608271	543	chr1-2607079-2608271	1193	0	ENSG00000142606	1	MMEL1	intron	0	3129	0	0.0659883	-0.206957	-0.200687	-0.590553	-0.584305	-1.31689	0.330915	-1.14316	-0.473124	2.71997	0.301581	-0.888305	-0.00380029	0.45733	-0.560328	0.0823826	2.00994
629	chr1-2777292-2778613	543	chr1-2777292-2778613	1322	0	ENSG00000215912	1	TTC34	intron	0	11051	0	0.0659883	-0.206957	-0.200687	-0.590553	-0.584305	-1.31689	0.330915	-1.14316	-0.473124	2.71997	0.301581	-0.888305	-0.00380029	0.45733	-0.560328	0.0823826	2.00994
630	chr1-2811029-2811745	543	chr1-2811029-2811745	717	0		0		intergenic	0	9311	0	0.0659883	-0.206957	-0.200687	-0.590553	-0.584305	-1.31689	0.330915	-1.14316	-0.473124	2.71997	0.301581	-0.888305	-0.00380029	0.45733	-0.560328	0.0823826	2.00994
631	chr1-2821459-2822468	543	chr1-2821459-2822468	1010	0		0		intergenic	0	19741	0	0.0659883	-0.206957	-0.200687	-0.590553	-0.584305	-1.31689	0.330915	-1.14316	-0.473124	2.71997	0.301581	-0.888305	-0.00380029	0.45733	-0.560328	0.0823826	2.00994
632	chr1-2855288-2856472	543	chr1-2855288-2856472	1185	0		0		intergenic	0	53570	0	0.0659883	-0.206957	-0.200687	-0.590553	-0.584305	-1.31689	0.330915	-1.14316	-0.473124	2.71997	0.301581	-0.888305	-0.00380029	0.45733	-0.560328	0.0823826	2.00994
633	chr1-2861795-2862683	543	chr1-2861795-2862683	889	0		0		intergenic	0	60077	0	0.0659883	-0.206957	-0.200687	-0.590553	-0.584305	-1.31689	0.330915	-1.14316	-0.473124	2.71997	0.301581	-0.888305	-0.00380029	0.45733	-0.560328	0.0823826	2.00994
634	chr1-2891557-2892769	543	chr1-2891557-2892769	1213	0		0		intergenic	0	89839	0	0.0659883	-0.206957	-0.200687	-0.590553	-0.584305	-1.31689	0.330915	-1.14316	-0.473124	2.71997	0.301581	-0.888305	-0.00380029	0.45733	-0.560328	0.0823826	2.00994
635	chr1-2905442-2906921	543	chr1-2905442-2906921	1480	0		0		intergenic	0	103724	0	0.0659883	-0.206957	-0.200687	-0.590553	-0.584305	-1.31689	0.330915	-1.14316	-0.473124	2.71997	0.301581	-0.888305	-0.00380029	0.45733	-0.560328	0.0823826	2.00994
636	chr1-2921945-2922341	543	chr1-2921945-2922341	397	0		0		intergenic	0	99141	0	0.0659883	-0.206957	-0.200687	-0.590553	-0.584305	-1.31689	0.330915	-1.14316	-0.473124	2.71997	0.301581	-0.888305	-0.00380029	0.45733	-0.560328	0.0823826	2.00994
637	chr1-2925726-2926258	543	chr1-2925726-2926258	533	0		0		intergenic	0	95224	0	0.0659883	-0.206957	-0.200687	-0.590553	-0.584305	-1.31689	0.330915	-1.14316	-0.473124	2.71997	0.301581	-0.888305	-0.00380029	0.45733	-0.560328	0.0823826	2.00994
638	chr1-2926438-2926693	543	chr1-2926438-2926693	256	0		0		intergenic	0	94789	0	0.0659883	-0.206957	-0.200687	-0.590553	-0.584305	-1.31689	0.330915	-1.14316	-0.473124	2.71997	0.301581	-0.888305	-0.00380029	0.45733	-0.560328	0.0823826	2.00994
639	chr1-2928434-2929018	543	chr1-2928434-2929018	585	0		0		intergenic	0	92464	0	0.0659883	-0.206957	-0.200687	-0.590553	-0.584305	-1.31689	0.330915	-1.14316	-0.473124	2.71997	0.301581	-0.888305	-0.00380029	0.45733	-0.560328	0.0823826	2.00994
640	chr1-2935701-2936021	543	chr1-2935701-2936021	321	0		0		intergenic	0	85461	0	0.0659883	-0.206957	-0.200687	-0.590553	-0.584305	-1.31689	0.330915	-1.14316	-0.473124	2.71997	0.301581	-0.888305	-0.00380029	0.45733	-0.560328	0.0823826	2.00994
641	chr1-2936128-2937295	543	chr1-2936128-2937295	1168	0		0		intergenic	0	84187	0	0.0659883	-0.206957	-0.200687	-0.590553	-0.584305	-1.31689	0.330915	-1.14316	-0.473124	2.71997	0.301581	-0.888305	-0.00380029	0.45733	-0.560328	0.0823826	2.00994
642	chr1-2966474-2967335	543	chr1-2966474-2967335	862	0		0		intergenic	0	54147	0	0.0659883	-0.206957	-0.200687	-0.590553	-0.584305	-1.31689	0.330915	-1.14316	-0.473124	2.71997	0.301581	-0.888305	-0.00380029	0.45733	-0.560328	0.0823826	2.00994
643	chr1-2975366-2976400	543	chr1-2975366-2976400	1035	0		0		intergenic	0	45082	0	0.0659883	-0.206957	-0.200687	-0.590553	-0.584305	-1.31689	0.330915	-1.14316	-0.473124	2.71997	0.301581	-0.888305	-0.00380029	0.45733	-0.560328	0.0823826	2.00994
644	chr1-2984817-2985692	543	chr1-2984817-2985692	876	0		0		intergenic	0	35790	0	0.0659883	-0.206957	-0.200687	-0.590553	-0.584305	-1.31689	0.330915	-1.14316	-0.473124	2.71997	0.301581	-0.888305	-0.00380029	0.45733	-0.560328	0.0823826	2.00994
645	chr1-3063503-3064099	543	chr1-3063503-3064099	597	0		0		intergenic	0	5068	0	0.0659883	-0.206957	-0.200687	-0.590553	-0.584305	-1.31689	0.330915	-1.14316	-0.473124	2.71997	0.301581	-0.888305	-0.00380029	0.45733	-0.560328	0.0823826	2.00994
646	chr1-3097344-3098233	543	chr1-3097344-3098233	890	0	ENSG00000142611	1	PRDM16	intron	0	28132	0	0.0659883	-0.206957	-0.200687	-0.590553	-0.584305	-1.31689	0.330915	-1.14316	-0.473124	2.71997	0.301581	-0.888305	-0.00380029	0.45733	-0.560328	0.0823826	2.00994
647	chr1-3105066-3106096	543	chr1-3105066-3106096	1031	0	ENSG00000142611	1	PRDM16	intron	0	35854	0	0.0659883	-0.206957	-0.200687	-0.590553	-0.584305	-1.31689	0.330915	-1.14316	-0.473124	2.71997	0.301581	-0.888305	-0.00380029	0.45733	-0.560328	0.0823826	2.00994
648	chr1-3111110-3112055	543	chr1-3111110-3112055	946	0	ENSG00000142611	1	PRDM16	intron	0	41898	0	0.0659883	-0.206957	-0.200687	-0.590553	-0.584305	-1.31689	0.330915	-1.14316	-0.473124	2.71997	0.301581	-0.888305	-0.00380029	0.45733	-0.560328	0.0823826	2.00994
649	chr1-3112239-3113064	543	chr1-3112239-3113064	826	0	ENSG00000142611	1	PRDM16	intron	0	43027	0	0.0659883	-0.206957	-0.200687	-0.590553	-0.584305	-1.31689	0.330915	-1.14316	-0.473124	2.71997	0.301581	-0.888305	-0.00380029	0.45733	-0.560328	0.0823826	2.00994
650	chr1-3113228-3114116	543	chr1-3113228-3114116	889	0	ENSG00000142611	1	PRDM16	intron	0	44016	0	0.0659883	-0.206957	-0.200687	-0.590553	-0.584305	-1.31689	0.330915	-1.14316	-0.473124	2.71997	0.301581	-0.888305	-0.00380029	0.45733	-0.560328	0.0823826	2.00994
651	chr1-3133570-3134403	543	chr1-3133570-3134403	834	0	ENSG00000142611	1	PRDM16	intron	0	64358	0	0.0659883	-0.206957	-0.200687	-0.590553	-0.584305	-1.31689	0.330915	-1.14316	-0.473124	2.71997	0.301581	-0.888305	-0.00380029	0.45733	-0.560328	0.0823826	2.00994
652	chr1-3134656-3134952	543	chr1-3134656-3134952	297	0	ENSG00000142611	1	PRDM16	intron	0	65444	0	0.0659883	-0.206957	-0.200687	-0.590553	-0.584305	-1.31689	0.330915	-1.14316	-0.473124	2.71997	0.301581	-0.888305	-0.00380029	0.45733	-0.560328	0.0823826	2.00994
653	chr1-3135218-3135797	543	chr1-3135218-3135797	580	0	ENSG00000142611	1	PRDM16	intron	0	66006	0	0.0659883	-0.206957	-0.200687	-0.590553	-0.584305	-1.31689	0.330915	-1.14316	-0.473124	2.71997	0.301581	-0.888305	-0.00380029	0.45733	-0.560328	0.0823826	2.00994
654	chr1-3145386-3146427	543	chr1-3145386-3146427	1042	0	ENSG00000142611	1	PRDM16	intron	0	76174	0	0.0659883	-0.206957	-0.200687	-0.590553	-0.584305	-1.31689	0.330915	-1.14316	-0.473124	2.71997	0.301581	-0.888305	-0.00380029	0.45733	-0.560328	0.0823826	2.00994
655	chr1-3162201-3162769	543	chr1-3162201-3162769	569	0	ENSG00000142611	1	PRDM16	intron	0	75161	0	0.0659883	-0.206957	-0.200687	-0.590553	-0.584305	-1.31689	0.330915	-1.14316	-0.473124	2.71997	0.301581	-0.888305	-0.00380029	0.45733	-0.560328	0.0823826	2.00994
656	chr1-3168354-3168941	543	chr1-3168354-3168941	588	0	ENSG00000142611	1	PRDM16	intron	0	68989	0	0.0659883	-0.206957	-0.200687	-0.590553	-0.584305	-1.31689	0.330915	-1.14316	-0.473124	2.71997	0.301581	-0.888305	-0.00380029	0.45733	-0.560328	0.0823826	2.00994
657	chr1-3168962-3169593	543	chr1-3168962-3169593	632	0	ENSG00000142611	1	PRDM16	intron	0	68337	0	0.0659883	-0.206957	-0.200687	-0.590553	-0.584305	-1.31689	0.330915	-1.14316	-0.473124	2.71997	0.301581	-0.888305	-0.00380029	0.45733	-0.560328	0.0823826	2.00994
658	chr1-3174731-3175217	543	chr1-3174731-3175217	487	0	ENSG00000142611	1	PRDM16	intron	0	62713	0	0.0659883	-0.206957	-0.200687	-0.590553	-0.584305	-1.31689	0.330915	-1.14316	-0.473124	2.71997	0.301581	-0.888305	-0.00380029	0.45733	-0.560328	0.0823826	2.00994
659	chr1-3180047-3180896	543	chr1-3180047-3180896	850	0	ENSG00000142611	1	PRDM16	intron	0	57034	0	0.0659883	-0.206957	-0.200687	-0.590553	-0.584305	-1.31689	0.330915	-1.14316	-0.473124	2.71997	0.301581	-0.888305	-0.00380029	0.45733	-0.560328	0.0823826	2.00994
660	chr1-3185963-3187097	543	chr1-3185963-3187097	1135	1	ENSG00000142611	1	PRDM16	exon	0	50833	0	0.0659883	-0.206957	-0.200687	-0.590553	-0.584305	-1.31689	0.330915	-1.14316	-0.473124	2.71997	0.301581	-0.888305	-0.00380029	0.45733	-0.560328	0.0823826	2.00994
661	chr1-3188088-3188885	543	chr1-3188088-3188885	798	0	ENSG00000142611	1	PRDM16	intron	0	49045	0	0.0659883	-0.206957	-0.200687	-0.590553	-0.584305	-1.31689	0.330915	-1.14316	-0.473124	2.71997	0.301581	-0.888305	-0.00380029	0.45733	-0.560328	0.0823826	2.00994
662	chr1-3195019-3196223	543	chr1-3195019-3196223	1205	0	ENSG00000142611	1	PRDM16	intron	0	41707	0	0.0659883	-0.206957	-0.200687	-0.590553	-0.584305	-1.31689	0.330915	-1.14316	-0.473124	2.71997	0.301581	-0.888305	-0.00380029	0.45733	-0.560328	0.0823826	2.00994
663	chr1-3196519-3196877	543	chr1-3196519-3196877	359	0	ENSG00000142611	1	PRDM16	intron	0	41053	0	0.0659883	-0.206957	-0.200687	-0.590553	-0.584305	-1.31689	0.330915	-1.14316	-0.473124	2.71997	0.301581	-0.888305	-0.00380029	0.45733	-0.560328	0.0823826	2.00994
664	chr1-3207025-3207759	543	chr1-3207025-3207759	735	0	ENSG00000142611	1	PRDM16	intron	0	30171	0	0.0659883	-0.206957	-0.200687	-0.590553	-0.584305	-1.31689	0.330915	-1.14316	-0.473124	2.71997	0.301581	-0.888305	-0.00380029	0.45733	-0.560328	0.0823826	2.00994
665	chr1-3215515-3216303	543	chr1-3215515-3216303	789	0	ENSG00000142611	1	PRDM16	intron	0	21627	0	0.0659883	-0.206957	-0.200687	-0.590553	-0.584305	-1.31689	0.330915	-1.14316	-0.473124	2.71997	0.301581	-0.888305	-0.00380029	0.45733	-0.560328	0.0823826	2.00994
666	chr1-3218981-3219963	543	chr1-3218981-3219963	983	0	ENSG00000142611	1	PRDM16	intron	0	17967	0	0.0659883	-0.206957	-0.200687	-0.590553	-0.584305	-1.31689	0.330915	-1.14316	-0.473124	2.71997	0.301581	-0.888305	-0.00380029	0.45733	-0.560328	0.0823826	2.00994
667	chr1-3221324-3222669	543	chr1-3221324-3222669	1346	0	ENSG00000142611	1	PRDM16	intron	0	15261	0	0.0659883	-0.206957	-0.200687	-0.590553	-0.584305	-1.31689	0.330915	-1.14316	-0.473124	2.71997	0.301581	-0.888305	-0.00380029	0.45733	-0.560328	0.0823826	2.00994
668	chr1-3228833-3230056	543	chr1-3228833-3230056	1224	0	ENSG00000142611	1	PRDM16	intron	0	7874	0	0.0659883	-0.206957	-0.200687	-0.590553	-0.584305	-1.31689	0.330915	-1.14316	-0.473124	2.71997	0.301581	-0.888305	-0.00380029	0.45733	-0.560328	0.0823826	2.00994
669	chr1-3230543-3231113	543	chr1-3230543-3231113	571	0	ENSG00000142611	1	PRDM16	intron	0	6817	0	0.0659883	-0.206957	-0.200687	-0.590553	-0.584305	-1.31689	0.330915	-1.14316	-0.473124	2.71997	0.301581	-0.888305	-0.00380029	0.45733	-0.560328	0.0823826	2.00994
670	chr1-3240512-3241554	543	chr1-3240512-3241554	1043	0	ENSG00000142611	1	PRDM16	intron	0	2577	0	0.0659883	-0.206957	-0.200687	-0.590553	-0.584305	-1.31689	0.330915	-1.14316	-0.473124	2.71997	0.301581	-0.888305	-0.00380029	0.45733	-0.560328	0.0823826	2.00994
671	chr1-3247396-3248317	543	chr1-3247396-3248317	922	0	ENSG00000142611	1	PRDM16	intron	0	3263	0	0.0659883	-0.206957	-0.200687	-0.590553	-0.584305	-1.31689	0.330915	-1.14316	-0.473124	2.71997	0.301581	-0.888305	-0.00380029	0.45733	-0.560328	0.0823826	2.00994
672	chr1-3248389-3249027	543	chr1-3248389-3249027	639	0	ENSG00000142611	1	PRDM16	intron	0	4256	0	0.0659883	-0.206957	-0.200687	-0.590553	-0.584305	-1.31689	0.330915	-1.14316	-0.473124	2.71997	0.301581	-0.888305	-0.00380029	0.45733	-0.560328	0.0823826	2.00994
673	chr1-3249642-3250523	543	chr1-3249642-3250523	882	0	ENSG00000142611	1	PRDM16	intron	0	5509	0	0.0659883	-0.206957	-0.200687	-0.590553	-0.584305	-1.31689	0.330915	-1.14316	-0.473124	2.71997	0.301581	-0.888305	-0.00380029	0.45733	-0.560328	0.0823826	2.00994
674	chr1-3251646-3252968	543	chr1-3251646-3252968	1323	0	ENSG00000142611	1	PRDM16	intron	0	7513	0	0.0659883	-0.206957	-0.200687	-0.590553	-0.584305	-1.31689	0.330915	-1.14316	-0.473124	2.71997	0.301581	-0.888305	-0.00380029	0.45733	-0.560328	0.0823826	2.00994
675	chr1-3258106-3259392	543	chr1-3258106-3259392	1287	0	ENSG00000142611	1	PRDM16	intron	0	13973	0	0.0659883	-0.206957	-0.200687	-0.590553	-0.584305	-1.31689	0.330915	-1.14316	-0.473124	2.71997	0.301581	-0.888305	-0.00380029	0.45733	-0.560328	0.0823826	2.00994
676	chr1-3265944-3266710	543	chr1-3265944-3266710	767	0	ENSG00000142611	1	PRDM16	intron	0	21811	0	0.0659883	-0.206957	-0.200687	-0.590553	-0.584305	-1.31689	0.330915	-1.14316	-0.473124	2.71997	0.301581	-0.888305	-0.00380029	0.45733	-0.560328	0.0823826	2.00994
677	chr1-3274776-3275442	543	chr1-3274776-3275442	667	0	ENSG00000142611	1	PRDM16	intron	0	30643	0	0.0659883	-0.206957	-0.200687	-0.590553	-0.584305	-1.31689	0.330915	-1.14316	-0.473124	2.71997	0.301581	-0.888305	-0.00380029	0.45733	-0.560328	0.0823826	2.00994
678	chr1-3275498-3276358	543	chr1-3275498-3276358	861	0	ENSG00000142611	1	PRDM16	intron	0	31365	0	0.0659883	-0.206957	-0.200687	-0.590553	-0.584305	-1.31689	0.330915	-1.14316	-0.473124	2.71997	0.301581	-0.888305	-0.00380029	0.45733	-0.560328	0.0823826	2.00994
679	chr1-3278531-3278935	543	chr1-3278531-3278935	405	0	ENSG00000142611	1	PRDM16	intron	0	34398	0	0.0659883	-0.206957	-0.200687	-0.590553	-0.584305	-1.31689	0.330915	-1.14316	-0.473124	2.71997	0.301581	-0.888305	-0.00380029	0.45733	-0.560328	0.0823826	2.00994
680	chr1-3279383-3279984	543	chr1-3279383-3279984	602	0	ENSG00000142611	1	PRDM16	intron	0	35250	0	0.0659883	-0.206957	-0.200687	-0.590553	-0.584305	-1.31689	0.330915	-1.14316	-0.473124	2.71997	0.301581	-0.888305	-0.00380029	0.45733	-0.560328	0.0823826	2.00994
681	chr1-3283632-3284296	543	chr1-3283632-3284296	665	0	ENSG00000142611	1	PRDM16	intron	0	39499	0	0.0659883	-0.206957	-0.200687	-0.590553	-0.584305	-1.31689	0.330915	-1.14316	-0.473124	2.71997	0.301581	-0.888305	-0.00380029	0.45733	-0.560328	0.0823826	2.00994
682	chr1-3291567-3292602	543	chr1-3291567-3292602	1036	0	ENSG00000142611	1	PRDM16	intron	0	47434	0	0.0659883	-0.206957	-0.200687	-0.590553	-0.584305	-1.31689	0.330915	-1.14316	-0.473124	2.71997	0.301581	-0.888305	-0.00380029	0.45733	-0.560328	0.0823826	2.00994
683	chr1-3326604-3327563	543	chr1-3326604-3327563	960	0	ENSG00000142611	1	PRDM16	intron	0	68927	0	0.0659883	-0.206957	-0.200687	-0.590553	-0.584305	-1.31689	0.330915	-1.14316	-0.473124	2.71997	0.301581	-0.888305	-0.00380029	0.45733	-0.560328	0.0823826	2.00994
684	chr1-3345714-3346187	543	chr1-3345714-3346187	474	0	ENSG00000142611	1	PRDM16	intron	0	50303	0	0.0659883	-0.206957	-0.200687	-0.590553	-0.584305	-1.31689	0.330915	-1.14316	-0.473124	2.71997	0.301581	-0.888305	-0.00380029	0.45733	-0.560328	0.0823826	2.00994
685	chr1-3348298-3348641	543	chr1-3348298-3348641	344	0	ENSG00000142611	1	PRDM16	intron	0	47849	0	0.0659883	-0.206957	-0.200687	-0.590553	-0.584305	-1.31689	0.330915	-1.14316	-0.473124	2.71997	0.301581	-0.888305	-0.00380029	0.45733	-0.560328	0.0823826	2.00994
686	chr1-3348851-3350014	543	chr1-3348851-3350014	1164	0	ENSG00000142611	1	PRDM16	intron	0	46476	0	0.0659883	-0.206957	-0.200687	-0.590553	-0.584305	-1.31689	0.330915	-1.14316	-0.473124	2.71997	0.301581	-0.888305	-0.00380029	0.45733	-0.560328	0.0823826	2.00994
687	chr1-3350503-3351127	543	chr1-3350503-3351127	625	0	ENSG00000142611	1	PRDM16	intron	0	45363	0	0.0659883	-0.206957	-0.200687	-0.590553	-0.584305	-1.31689	0.330915	-1.14316	-0.473124	2.71997	0.301581	-0.888305	-0.00380029	0.45733	-0.560328	0.0823826	2.00994
688	chr1-3364412-3365119	543	chr1-3364412-3365119	708	0	ENSG00000142611	1	PRDM16	intron	0	31371	0	0.0659883	-0.206957	-0.200687	-0.590553	-0.584305	-1.31689	0.330915	-1.14316	-0.473124	2.71997	0.301581	-0.888305	-0.00380029	0.45733	-0.560328	0.0823826	2.00994
689	chr1-3369405-3370090	543	chr1-3369405-3370090	686	0	ENSG00000142611	1	PRDM16	intron	0	26400	0	0.0659883	-0.206957	-0.200687	-0.590553	-0.584305	-1.31689	0.330915	-1.14316	-0.473124	2.71997	0.301581	-0.888305	-0.00380029	0.45733	-0.560328	0.0823826	2.00994
690	chr1-3380003-3381022	543	chr1-3380003-3381022	1020	0	ENSG00000142611	1	PRDM16	intron	0	15468	0	0.0659883	-0.206957	-0.200687	-0.590553	-0.584305	-1.31689	0.330915	-1.14316	-0.473124	2.71997	0.301581	-0.888305	-0.00380029	0.45733	-0.560328	0.0823826	2.00994
691	chr1-3409600-3410499	543	chr1-3409600-3410499	900	0	ENSG00000142611	1	PRDM16	intron	0	13108	0	0.0659883	-0.206957	-0.200687	-0.590553	-0.584305	-1.31689	0.330915	-1.14316	-0.473124	2.71997	0.301581	-0.888305	-0.00380029	0.45733	-0.560328	0.0823826	2.00994
692	chr1-3441023-3442142	543	chr1-3441023-3442142	1120	0		0		intergenic	0	12283	0	0.0659883	-0.206957	-0.200687	-0.590553	-0.584305	-1.31689	0.330915	-1.14316	-0.473124	2.71997	0.301581	-0.888305	-0.00380029	0.45733	-0.560328	0.0823826	2.00994
693	chr1-3452926-3453628	543	chr1-3452926-3453628	703	0	ENSG00000130762	0	ARHGEF16	promoter	1	797	0	0.0659883	-0.206957	-0.200687	-0.590553	-0.584305	-1.31689	0.330915	-1.14316	-0.473124	2.71997	0.301581	-0.888305	-0.00380029	0.45733	-0.560328	0.0823826	2.00994
694	chr1-3454064-3455433	543	chr1-3454064-3455433	1370	1	ENSG00000130762	1	ARHGEF16	exon	1	0	0	0.0659883	-0.206957	-0.200687	-0.590553	-0.584305	-1.31689	0.330915	-1.14316	-0.473124	2.71997	0.301581	-0.888305	-0.00380029	0.45733	-0.560328	0.0823826	2.00994
695	chr1-3456701-3456990	543	chr1-3456701-3456990	290	0	ENSG00000130762	1	ARHGEF16	intron	0	2274	0	0.0659883	-0.206957	-0.200687	-0.590553	-0.584305	-1.31689	0.330915	-1.14316	-0.473124	2.71997	0.301581	-0.888305	-0.00380029	0.45733	-0.560328	0.0823826	2.00994
696	chr1-3460032-3460977	543	chr1-3460032-3460977	946	0	ENSG00000130762	1	ARHGEF16	intron	0	5027	0	0.0659883	-0.206957	-0.200687	-0.590553	-0.584305	-1.31689	0.330915	-1.14316	-0.473124	2.71997	0.301581	-0.888305	-0.00380029	0.45733	-0.560328	0.0823826	2.00994
697	chr1-3471159-3472365	543	chr1-3471159-3472365	1207	1	ENSG00000130762	1	ARHGEF16	exon	1	0	0	0.0659883	-0.206957	-0.200687	-0.590553	-0.584305	-1.31689	0.330915	-1.14316	-0.473124	2.71997	0.301581	-0.888305	-0.00380029	0.45733	-0.560328	0.0823826	2.00994
698	chr1-3483553-3484336	543	chr1-3483553-3484336	784	0		0		intergenic	0	9149	0	0.0659883	-0.206957	-0.200687	-0.590553	-0.584305	-1.31689	0.330915	-1.14316	-0.473124	2.71997	0.301581	-0.888305	-0.00380029	0.45733	-0.560328	0.0823826	2.00994
699	chr1-3538682-3538964	543	chr1-3538682-3538964	283	0	ENSG00000162591	1	MEGF6	intron	0	7233	0	0.0659883	-0.206957	-0.200687	-0.590553	-0.584305	-1.31689	0.330915	-1.14316	-0.473124	2.71997	0.301581	-0.888305	-0.00380029	0.45733	-0.560328	0.0823826	2.00994
700	chr1-3539753-3540649	543	chr1-3539753-3540649	897	0	ENSG00000162591	1	MEGF6	intron	0	8304	0	0.0659883	-0.206957	-0.200687	-0.590553	-0.584305	-1.31689	0.330915	-1.14316	-0.473124	2.71997	0.301581	-0.888305	-0.00380029	0.45733	-0.560328	0.0823826	2.00994
701	chr1-3543020-3543658	543	chr1-3543020-3543658	639	0	ENSG00000162591	1	MEGF6	intron	0	11571	0	0.0659883	-0.206957	-0.200687	-0.590553	-0.584305	-1.31689	0.330915	-1.14316	-0.473124	2.71997	0.301581	-0.888305	-0.00380029	0.45733	-0.560328	0.0823826	2.00994
702	chr1-3553033-3554102	543	chr1-3553033-3554102	1070	0	ENSG00000162591	1	MEGF6	intron	0	21584	0	0.0659883	-0.206957	-0.200687	-0.590553	-0.584305	-1.31689	0.330915	-1.14316	-0.473124	2.71997	0.301581	-0.888305	-0.00380029	0.45733	-0.560328	0.0823826	2.00994
703	chr1-3557063-3557980	543	chr1-3557063-3557980	918	0	ENSG00000162591	1	MEGF6	intron	0	25614	0	0.0659883	-0.206957	-0.200687	-0.590553	-0.584305	-1.31689	0.330915	-1.14316	-0.473124	2.71997	0.301581	-0.888305	-0.00380029	0.45733	-0.560328	0.0823826	2.00994
704	chr1-3560204-3561036	543	chr1-3560204-3561036	833	0	ENSG00000162591	1	MEGF6	intron	0	28755	0	0.0659883	-0.206957	-0.200687	-0.590553	-0.584305	-1.31689	0.330915	-1.14316	-0.473124	2.71997	0.301581	-0.888305	-0.00380029	0.45733	-0.560328	0.0823826	2.00994
705	chr1-3561518-3562115	543	chr1-3561518-3562115	598	0	ENSG00000162591	1	MEGF6	intron	0	30069	0	0.0659883	-0.206957	-0.200687	-0.590553	-0.584305	-1.31689	0.330915	-1.14316	-0.473124	2.71997	0.301581	-0.888305	-0.00380029	0.45733	-0.560328	0.0823826	2.00994
706	chr1-3564764-3565025	543	chr1-3564764-3565025	262	0	ENSG00000162591	1	MEGF6	intron	0	33315	0	0.0659883	-0.206957	-0.200687	-0.590553	-0.584305	-1.31689	0.330915	-1.14316	-0.473124	2.71997	0.301581	-0.888305	-0.00380029	0.45733	-0.560328	0.0823826	2.00994
707	chr1-3573358-3574016	543	chr1-3573358-3574016	659	0	ENSG00000162591	1	MEGF6	intron	0	37260	0	0.0659883	-0.206957	-0.200687	-0.590553	-0.584305	-1.31689	0.330915	-1.14316	-0.473124	2.71997	0.301581	-0.888305	-0.00380029	0.45733	-0.560328	0.0823826	2.00994
708	chr1-3576015-3576401	543	chr1-3576015-3576401	387	0	ENSG00000162591	1	MEGF6	intron	0	34875	0	0.0659883	-0.206957	-0.200687	-0.590553	-0.584305	-1.31689	0.330915	-1.14316	-0.473124	2.71997	0.301581	-0.888305	-0.00380029	0.45733	-0.560328	0.0823826	2.00994
709	chr1-3577111-3578388	543	chr1-3577111-3578388	1278	0	ENSG00000162591	1	MEGF6	intron	0	32888	0	0.0659883	-0.206957	-0.200687	-0.590553	-0.584305	-1.31689	0.330915	-1.14316	-0.473124	2.71997	0.301581	-0.888305	-0.00380029	0.45733	-0.560328	0.0823826	2.00994
710	chr1-3640113-3640846	543	chr1-3640113-3640846	734	0	ENSG00000116213	1	WRAP73	promoter	1	487	0	0.0659883	-0.206957	-0.200687	-0.590553	-0.584305	-1.31689	0.330915	-1.14316	-0.473124	2.71997	0.301581	-0.888305	-0.00380029	0.45733	-0.560328	0.0823826	2.00994
711	chr1-3668464-3669364	543	chr1-3668464-3669364	901	0	ENSG00000078900	1	TP73	intron	0	13001	0	0.0659883	-0.206957	-0.200687	-0.590553	-0.584305	-1.31689	0.330915	-1.14316	-0.473124	2.71997	0.301581	-0.888305	-0.00380029	0.45733	-0.560328	0.0823826	2.00994
712	chr1-3697147-3697472	543	chr1-3697147-3697472	326	0	ENSG00000078900	1	TP73	promoter	1	573	0	0.0659883	-0.206957	-0.200687	-0.590553	-0.584305	-1.31689	0.330915	-1.14316	-0.473124	2.71997	0.301581	-0.888305	-0.00380029	0.45733	-0.560328	0.0823826	2.00994
713	chr1-3699417-3700138	543	chr1-3699417-3700138	722	0	ENSG00000078900	1	TP73	intron	0	1358	0	0.0659883	-0.206957	-0.200687	-0.590553	-0.584305	-1.31689	0.330915	-1.14316	-0.473124	2.71997	0.301581	-0.888305	-0.00380029	0.45733	-0.560328	0.0823826	2.00994
714	chr1-3712966-3713407	543	chr1-3712966-3713407	442	0	ENSG00000078900	1	TP73	intron	0	14070	0	0.0659883	-0.206957	-0.200687	-0.590553	-0.584305	-1.31689	0.330915	-1.14316	-0.473124	2.71997	0.301581	-0.888305	-0.00380029	0.45733	-0.560328	0.0823826	2.00994
715	chr1-3714228-3714717	543	chr1-3714228-3714717	490	0	ENSG00000078900	1	TP73	intron	0	12760	0	0.0659883	-0.206957	-0.200687	-0.590553	-0.584305	-1.31689	0.330915	-1.14316	-0.473124	2.71997	0.301581	-0.888305	-0.00380029	0.45733	-0.560328	0.0823826	2.00994
716	chr1-3727131-3727621	543	chr1-3727131-3727621	491	1	ENSG00000078900	1	TP73	exon	1	0	0	0.0659883	-0.206957	-0.200687	-0.590553	-0.584305	-1.31689	0.330915	-1.14316	-0.473124	2.71997	0.301581	-0.888305	-0.00380029	0.45733	-0.560328	0.0823826	2.00994
717	chr1-3748413-3748783	543	chr1-3748413-3748783	371	0	ENSG00000162592	1	CCDC27	intron	0	1952	0	0.0659883	-0.206957	-0.200687	-0.590553	-0.584305	-1.31689	0.330915	-1.14316	-0.473124	2.71997	0.301581	-0.888305	-0.00380029	0.45733	-0.560328	0.0823826	2.00994
718	chr1-3776639-3776866	543	chr1-3776639-3776866	228	0		0		intergenic	0	3575	0	0.0659883	-0.206957	-0.200687	-0.590553	-0.584305	-1.31689	0.330915	-1.14316	-0.473124	2.71997	0.301581	-0.888305	-0.00380029	0.45733	-0.560328	0.0823826	2.00994
719	chr1-3777092-3777350	543	chr1-3777092-3777350	259	0		0		intergenic	0	4028	0	0.0659883	-0.206957	-0.200687	-0.590553	-0.584305	-1.31689	0.330915	-1.14316	-0.473124	2.71997	0.301581	-0.888305	-0.00380029	0.45733	-0.560328	0.0823826	2.00994
720	chr1-3783450-3784371	543	chr1-3783450-3784371	922	1	ENSG00000130764	1	LRRC47	exon	1	0	0	0.0659883	-0.206957	-0.200687	-0.590553	-0.584305	-1.31689	0.330915	-1.14316	-0.473124	2.71997	0.301581	-0.888305	-0.00380029	0.45733	-0.560328	0.0823826	2.00994
721	chr1-3784945-3785762	543	chr1-3784945-3785762	818	1	ENSG00000130764	1	LRRC47	exon	1	769	0	0.0659883	-0.206957	-0.200687	-0.590553	-0.584305	-1.31689	0.330915	-1.14316	-0.473124	2.71997	0.301581	-0.888305	-0.00380029	0.45733	-0.560328	0.0823826	2.00994
722	chr1-3793277-3793902	543	chr1-3793277-3793902	626	0	ENSG00000130764	1	LRRC47	intron	0	2601	0	0.0659883	-0.206957	-0.200687	-0.590553	-0.584305	-1.31689	0.330915	-1.14316	-0.473124	2.71997	0.301581	-0.888305	-0.00380029	0.45733	-0.560328	0.0823826	2.00994
723	chr1-3800982-3801700	543	chr1-3800982-3801700	719	0		0		intergenic	0	4477	0	0.0659883	-0.206957	-0.200687	-0.590553	-0.584305	-1.31689	0.330915	-1.14316	-0.473124	2.71997	0.301581	-0.888305	-0.00380029	0.45733	-0.560328	0.0823826	2.00994
724	chr1-3811073-3811806	543	chr1-3811073-3811806	734	0		0		intergenic	0	4651	0	0.0659883	-0.206957	-0.200687	-0.590553	-0.584305	-1.31689	0.330915	-1.14316	-0.473124	2.71997	0.301581	-0.888305	-0.00380029	0.45733	-0.560328	0.0823826	2.00994
725	chr1-3827700-3828284	543	chr1-3827700-3828284	585	0	ENSG00000116198	1	CEP104	intron	0	1021	0	0.0659883	-0.206957	-0.200687	-0.590553	-0.584305	-1.31689	0.330915	-1.14316	-0.473124	2.71997	0.301581	-0.888305	-0.00380029	0.45733	-0.560328	0.0823826	2.00994
726	chr1-3846516-3847417	543	chr1-3846516-3847417	902	0	ENSG00000116198	1	CEP104	intron	0	286	0	0.0659883	-0.206957	-0.200687	-0.590553	-0.584305	-1.31689	0.330915	-1.14316	-0.473124	2.71997	0.301581	-0.888305	-0.00380029	0.45733	-0.560328	0.0823826	2.00994
727	chr1-3869697-3870213	543	chr1-3869697-3870213	517	1	ENSG00000169598	1	DFFB	exon	0	2033	0	0.0659883	-0.206957	-0.200687	-0.590553	-0.584305	-1.31689	0.330915	-1.14316	-0.473124	2.71997	0.301581	-0.888305	-0.00380029	0.45733	-0.560328	0.0823826	2.00994
728	chr1-3924059-3925302	543	chr1-3924059-3925302	1244	0		0		intergenic	0	23765	0	0.0659883	-0.206957	-0.200687	-0.590553	-0.584305	-1.31689	0.330915	-1.14316	-0.473124	2.71997	0.301581	-0.888305	-0.00380029	0.45733	-0.560328	0.0823826	2.00994
729	chr1-3940093-3941544	543	chr1-3940093-3941544	1452	0		0		intergenic	0	39799	0	0.0659883	-0.206957	-0.200687	-0.590553	-0.584305	-1.31689	0.330915	-1.14316	-0.473124	2.71997	0.301581	-0.888305	-0.00380029	0.45733	-0.560328	0.0823826	2.00994
730	chr1-3958256-3959338	543	chr1-3958256-3959338	1083	0		0		intergenic	0	57962	0	0.0659883	-0.206957	-0.200687	-0.590553	-0.584305	-1.31689	0.330915	-1.14316	-0.473124	2.71997	0.301581	-0.888305	-0.00380029	0.45733	-0.560328	0.0823826	2.00994
731	chr1-3998066-3998992	543	chr1-3998066-3998992	927	0		0		intergenic	0	97772	0	0.0659883	-0.206957	-0.200687	-0.590553	-0.584305	-1.31689	0.330915	-1.14316	-0.473124	2.71997	0.301581	-0.888305	-0.00380029	0.45733	-0.560328	0.0823826	2.00994
732	chr1-4027224-4028052	543	chr1-4027224-4028052	829	0		0		intergenic	0	126930	0	0.0659883	-0.206957	-0.200687	-0.590553	-0.584305	-1.31689	0.330915	-1.14316	-0.473124	2.71997	0.301581	-0.888305	-0.00380029	0.45733	-0.560328	0.0823826	2.00994
733	chr1-13581333-13581573	75	chr1-13581333-13581573	241	0	ENSG00000162493	0	PDPN	promoter	1	1891	0	3.2359	-0.256232	-0.405782	-0.395314	-0.26744	-0.395276	-0.255563	-0.423718	-0.461723	-0.467117	-0.354194	-0.0842937	-0.163833	-0.43659	-0.517235	2.10134	-0.452935
734	chr1-13582270-13582588	75	chr1-13582270-13582588	319	0	ENSG00000162493	0	PDPN	promoter	1	876	0	3.2359	-0.256232	-0.405782	-0.395314	-0.26744	-0.395276	-0.255563	-0.423718	-0.461723	-0.467117	-0.354194	-0.0842937	-0.163833	-0.43659	-0.517235	2.10134	-0.452935
735	chr1-13582592-13582942	75	chr1-13582592-13582942	351	0	ENSG00000162493	0	PDPN	promoter	1	522	0	3.2359	-0.256232	-0.405782	-0.395314	-0.26744	-0.395276	-0.255563	-0.423718	-0.461723	-0.467117	-0.354194	-0.0842937	-0.163833	-0.43659	-0.517235	2.10134	-0.452935
736	chr1-13708146-13708928	78	chr1-13708146-13708928	783	0	ENSG00000116731	1	PRDM2	intron	0	3290	0	-0.0296809	-0.584123	-0.480483	0.78481	-0.159477	2.28884	-0.441342	2.8035	0.182091	-0.475309	-0.531039	-0.37988	-0.566601	-0.65819	-0.650271	-0.446817	-0.656028
737	chr1-13709354-13709981	78	chr1-13709354-13709981	628	0	ENSG00000116731	1	PRDM2	intron	0	4498	0	-0.0296809	-0.584123	-0.480483	0.78481	-0.159477	2.28884	-0.441342	2.8035	0.182091	-0.475309	-0.531039	-0.37988	-0.566601	-0.65819	-0.650271	-0.446817	-0.656028
738	chr1-13900617-13901927	78	chr1-13900617-13901927	1311	0	ENSG00000189337	1	KAZN	intron	0	7824	0	-0.0296809	-0.584123	-0.480483	0.78481	-0.159477	2.28884	-0.441342	2.8035	0.182091	-0.475309	-0.531039	-0.37988	-0.566601	-0.65819	-0.650271	-0.446817	-0.656028
739	chr1-14238424-14239326	81	chr1-14238424-14239326	903	0	ENSG00000189337	1	KAZN	intron	0	345631	0	-0.740189	-0.0745834	-0.718858	-0.203275	-0.46151	-0.617467	-0.070221	-0.42395	0.242066	-0.0251853	1.4685	2.41871	2.16285	-0.932291	-0.902351	-0.723303	-0.398948
740	chr1-14241832-14242597	81	chr1-14241832-14242597	766	0	ENSG00000189337	1	KAZN	intron	0	349039	0	-0.740189	-0.0745834	-0.718858	-0.203275	-0.46151	-0.617467	-0.070221	-0.42395	0.242066	-0.0251853	1.4685	2.41871	2.16285	-0.932291	-0.902351	-0.723303	-0.398948
741	chr1-14246472-14247086	81	chr1-14246472-14247086	615	0	ENSG00000189337	1	KAZN	intron	0	351617	0	-0.740189	-0.0745834	-0.718858	-0.203275	-0.46151	-0.617467	-0.070221	-0.42395	0.242066	-0.0251853	1.4685	2.41871	2.16285	-0.932291	-0.902351	-0.723303	-0.398948
742	chr1-14251422-14252364	81	chr1-14251422-14252364	943	0	ENSG00000189337	1	KAZN	intron	0	346339	0	-0.740189	-0.0745834	-0.718858	-0.203275	-0.46151	-0.617467	-0.070221	-0.42395	0.242066	-0.0251853	1.4685	2.41871	2.16285	-0.932291	-0.902351	-0.723303	-0.398948
743	chr1-14253643-14254752	81	chr1-14253643-14254752	1110	0	ENSG00000189337	1	KAZN	intron	0	343951	0	-0.740189	-0.0745834	-0.718858	-0.203275	-0.46151	-0.617467	-0.070221	-0.42395	0.242066	-0.0251853	1.4685	2.41871	2.16285	-0.932291	-0.902351	-0.723303	-0.398948
744	chr1-14258780-14260262	81	chr1-14258780-14260262	1483	0	ENSG00000189337	1	KAZN	intron	0	338441	0	-0.740189	-0.0745834	-0.718858	-0.203275	-0.46151	-0.617467	-0.070221	-0.42395	0.242066	-0.0251853	1.4685	2.41871	2.16285	-0.932291	-0.902351	-0.723303	-0.398948
745	chr1-14323139-14324376	81	chr1-14323139-14324376	1238	0	ENSG00000189337	1	KAZN	intron	0	274327	0	-0.740189	-0.0745834	-0.718858	-0.203275	-0.46151	-0.617467	-0.070221	-0.42395	0.242066	-0.0251853	1.4685	2.41871	2.16285	-0.932291	-0.902351	-0.723303	-0.398948
746	chr1-14352173-14353297	81	chr1-14352173-14353297	1125	0	ENSG00000189337	1	KAZN	intron	0	245406	0	-0.740189	-0.0745834	-0.718858	-0.203275	-0.46151	-0.617467	-0.070221	-0.42395	0.242066	-0.0251853	1.4685	2.41871	2.16285	-0.932291	-0.902351	-0.723303	-0.398948
747	chr1-14371690-14372498	81	chr1-14371690-14372498	809	0	ENSG00000189337	1	KAZN	intron	0	226205	0	-0.740189	-0.0745834	-0.718858	-0.203275	-0.46151	-0.617467	-0.070221	-0.42395	0.242066	-0.0251853	1.4685	2.41871	2.16285	-0.932291	-0.902351	-0.723303	-0.398948
748	chr1-14436770-14437942	81	chr1-14436770-14437942	1173	0	ENSG00000189337	1	KAZN	intron	0	160761	0	-0.740189	-0.0745834	-0.718858	-0.203275	-0.46151	-0.617467	-0.070221	-0.42395	0.242066	-0.0251853	1.4685	2.41871	2.16285	-0.932291	-0.902351	-0.723303	-0.398948
749	chr1-14486283-14487206	81	chr1-14486283-14487206	924	0	ENSG00000189337	1	KAZN	intron	0	111497	0	-0.740189	-0.0745834	-0.718858	-0.203275	-0.46151	-0.617467	-0.070221	-0.42395	0.242066	-0.0251853	1.4685	2.41871	2.16285	-0.932291	-0.902351	-0.723303	-0.398948
750	chr1-14506969-14507672	81	chr1-14506969-14507672	704	0	ENSG00000189337	1	KAZN	intron	0	91031	0	-0.740189	-0.0745834	-0.718858	-0.203275	-0.46151	-0.617467	-0.070221	-0.42395	0.242066	-0.0251853	1.4685	2.41871	2.16285	-0.932291	-0.902351	-0.723303	-0.398948
751	chr1-14546113-14547210	81	chr1-14546113-14547210	1098	0	ENSG00000189337	1	KAZN	intron	0	51493	0	-0.740189	-0.0745834	-0.718858	-0.203275	-0.46151	-0.617467	-0.070221	-0.42395	0.242066	-0.0251853	1.4685	2.41871	2.16285	-0.932291	-0.902351	-0.723303	-0.398948
752	chr1-14585416-14586546	81	chr1-14585416-14586546	1131	0	ENSG00000189337	1	KAZN	intron	0	12157	0	-0.740189	-0.0745834	-0.718858	-0.203275	-0.46151	-0.617467	-0.070221	-0.42395	0.242066	-0.0251853	1.4685	2.41871	2.16285	-0.932291	-0.902351	-0.723303	-0.398948
753	chr1-14602095-14602552	81	chr1-14602095-14602552	458	0	ENSG00000189337	1	KAZN	intron	0	3377	0	-0.740189	-0.0745834	-0.718858	-0.203275	-0.46151	-0.617467	-0.070221	-0.42395	0.242066	-0.0251853	1.4685	2.41871	2.16285	-0.932291	-0.902351	-0.723303	-0.398948
754	chr1-14689690-14690793	81	chr1-14689690-14690793	1104	0	ENSG00000189337	1	KAZN	intron	0	90972	0	-0.740189	-0.0745834	-0.718858	-0.203275	-0.46151	-0.617467	-0.070221	-0.42395	0.242066	-0.0251853	1.4685	2.41871	2.16285	-0.932291	-0.902351	-0.723303	-0.398948
755	chr1-14304209-14305183	95	chr1-14304209-14305183	975	1	ENSG00000189337	1	KAZN	exon	0	293520	0	-0.204558	-0.111788	-0.315744	-0.236197	-0.359366	-0.275461	0.433223	-0.44867	-0.413761	-0.267622	-0.315219	-0.253335	-0.301268	-0.335788	-0.190871	3.92926	-0.332837
756	chr1-14553395-14554218	95	chr1-14553395-14554218	824	0	ENSG00000189337	1	KAZN	intron	0	44485	0	-0.204558	-0.111788	-0.315744	-0.236197	-0.359366	-0.275461	0.433223	-0.44867	-0.413761	-0.267622	-0.315219	-0.253335	-0.301268	-0.335788	-0.190871	3.92926	-0.332837
757	chr1-14731571-14732316	95	chr1-14731571-14732316	746	0	ENSG00000189337	1	KAZN	intron	0	132853	0	-0.204558	-0.111788	-0.315744	-0.236197	-0.359366	-0.275461	0.433223	-0.44867	-0.413761	-0.267622	-0.315219	-0.253335	-0.301268	-0.335788	-0.190871	3.92926	-0.332837
758	chr1-14977124-14977901	95	chr1-14977124-14977901	778	0	ENSG00000189337	1	KAZN	intron	0	31204	0	-0.204558	-0.111788	-0.315744	-0.236197	-0.359366	-0.275461	0.433223	-0.44867	-0.413761	-0.267622	-0.315219	-0.253335	-0.301268	-0.335788	-0.190871	3.92926	-0.332837
759	chr1-15027261-15028554	95	chr1-15027261-15028554	1294	0	ENSG00000189337	1	KAZN	intron	0	81341	0	-0.204558	-0.111788	-0.315744	-0.236197	-0.359366	-0.275461	0.433223	-0.44867	-0.413761	-0.267622	-0.315219	-0.253335	-0.301268	-0.335788	-0.190871	3.92926	-0.332837
760	chr1-15141715-15142416	95	chr1-15141715-15142416	702	0		0		intergenic	0	10115	0	-0.204558	-0.111788	-0.315744	-0.236197	-0.359366	-0.275461	0.433223	-0.44867	-0.413761	-0.267622	-0.315219	-0.253335	-0.301268	-0.335788	-0.190871	3.92926	-0.332837
761	chr1-143719662-143721144	83	chr1-143719662-143721144	1483	0		0		intergenic	0	184821	0	-0.941317	-0.375222	-0.21463	1.97713	0.927504	0.575219	2.04908	0.877895	0.110187	-1.03886	-0.935126	0.0549164	-0.61696	-1.35594	-0.410009	0.454137	-1.138
762	chr1-143733835-143734659	83	chr1-143733835-143734659	825	0		0		intergenic	0	171306	0	-0.941317	-0.375222	-0.21463	1.97713	0.927504	0.575219	2.04908	0.877895	0.110187	-1.03886	-0.935126	0.0549164	-0.61696	-1.35594	-0.410009	0.454137	-1.138
763	chr1-143735607-143736934	83	chr1-143735607-143736934	1328	0		0		intergenic	0	169031	0	-0.941317	-0.375222	-0.21463	1.97713	0.927504	0.575219	2.04908	0.877895	0.110187	-1.03886	-0.935126	0.0549164	-0.61696	-1.35594	-0.410009	0.454137	-1.138
764	chr1-144545812-144547051	84	chr1-144545812-144547051	1240	0		0		intergenic	0	45816	0	-0.904167	-0.799151	-0.566743	1.40919	0.148298	0.763777	1.54395	-1.031	-1.15883	1.01701	-0.991237	-1.11561	0.286407	-0.702093	-0.44027	0.729584	1.81089
765	chr1-144551053-144552448	84	chr1-144551053-144552448	1396	0		0		intergenic	0	40419	0	-0.904167	-0.799151	-0.566743	1.40919	0.148298	0.763777	1.54395	-1.031	-1.15883	1.01701	-0.991237	-1.11561	0.286407	-0.702093	-0.44027	0.729584	1.81089
766	chr1-144560504-144561088	84	chr1-144560504-144561088	585	0		0		intergenic	0	31779	0	-0.904167	-0.799151	-0.566743	1.40919	0.148298	0.763777	1.54395	-1.031	-1.15883	1.01701	-0.991237	-1.11561	0.286407	-0.702093	-0.44027	0.729584	1.81089
767	chr1-145607659-145608419	87	chr1-145607659-145608419	761	1	ENSG00000117262	1	GPR89A	exon	1	0	0	-0.46347	-0.0178989	-0.374366	-0.0382006	-1.30806	-0.467415	-0.10447	0.563505	1.06758	1.514	0.955716	0.75152	-0.397018	1.64116	-1.319	-2.20122	0.197638
768	chr1-145823403-145824892	87	chr1-145823403-145824892	1490	1	ENSG00000186141	1	POLR3C	exon	1	0	0	-0.46347	-0.0178989	-0.374366	-0.0382006	-1.30806	-0.467415	-0.10447	0.563505	1.06758	1.514	0.955716	0.75152	-0.397018	1.64116	-1.319	-2.20122	0.197638
769	chr1-145960278-145960988	87	chr1-145960278-145960988	711	1	ENSG00000272031	1	ANKRD34A	exon	0	1607	0	-0.46347	-0.0178989	-0.374366	-0.0382006	-1.30806	-0.467415	-0.10447	0.563505	1.06758	1.514	0.955716	0.75152	-0.397018	1.64116	-1.319	-2.20122	0.197638
770	chr1-145964171-145965023	87	chr1-145964171-145965023	853	1	ENSG00000121851	1	POLR3GL	exon	1	0	0	-0.46347	-0.0178989	-0.374366	-0.0382006	-1.30806	-0.467415	-0.10447	0.563505	1.06758	1.514	0.955716	0.75152	-0.397018	1.64116	-1.319	-2.20122	0.197638
771	chr1-146035188-146035866	87	chr1-146035188-146035866	679	0	ENSG00000168509	1	HFE2	intron	0	879	0	-0.46347	-0.0178989	-0.374366	-0.0382006	-1.30806	-0.467415	-0.10447	0.563505	1.06758	1.514	0.955716	0.75152	-0.397018	1.64116	-1.319	-2.20122	0.197638
772	chr1-146038561-146039626	87	chr1-146038561-146039626	1066	0	ENSG00000168509	0	HFE2	promoter	1	1814	0	-0.46347	-0.0178989	-0.374366	-0.0382006	-1.30806	-0.467415	-0.10447	0.563505	1.06758	1.514	0.955716	0.75152	-0.397018	1.64116	-1.319	-2.20122	0.197638
773	chr1-147333996-147335167	89	chr1-147333996-147335167	1172	0		0		intergenic	0	63000	0	-0.532287	0.372569	1.58678	1.00985	2.16088	1.38134	0.584887	-0.273402	-0.652491	-1.02307	-1.01077	-0.918343	-0.806064	-0.593097	-1.00125	0.433278	-0.718813
774	chr1-147421772-147422581	89	chr1-147421772-147422581	810	0		0		intergenic	0	118830	0	-0.532287	0.372569	1.58678	1.00985	2.16088	1.38134	0.584887	-0.273402	-0.652491	-1.02307	-1.01077	-0.918343	-0.806064	-0.593097	-1.00125	0.433278	-0.718813
775	chr1-147493243-147493675	89	chr1-147493243-147493675	433	0		0		intergenic	0	47736	0	-0.532287	0.372569	1.58678	1.00985	2.16088	1.38134	0.584887	-0.273402	-0.652491	-1.02307	-1.01077	-0.918343	-0.806064	-0.593097	-1.00125	0.433278	-0.718813
776	chr1-147509291-147510727	89	chr1-147509291-147510727	1437	0		0		intergenic	0	30684	0	-0.532287	0.372569	1.58678	1.00985	2.16088	1.38134	0.584887	-0.273402	-0.652491	-1.02307	-1.01077	-0.918343	-0.806064	-0.593097	-1.00125	0.433278	-0.718813
777	chr1-147545026-147545500	89	chr1-147545026-147545500	475	0	ENSG00000116128	1	BCL9	intron	0	3613	0	-0.532287	0.372569	1.58678	1.00985	2.16088	1.38134	0.584887	-0.273402	-0.652491	-1.02307	-1.01077	-0.918343	-0.806064	-0.593097	-1.00125	0.433278	-0.718813
778	chr1-147640610-147641597	89	chr1-147640610-147641597	988	0	ENSG00000162836	1	ACP6	intron	0	9084	0	-0.532287	0.372569	1.58678	1.00985	2.16088	1.38134	0.584887	-0.273402	-0.652491	-1.02307	-1.01077	-0.918343	-0.806064	-0.593097	-1.00125	0.433278	-0.718813
779	chr1-147650829-147651814	89	chr1-147650829-147651814	986	1	ENSG00000162836	1	ACP6	exon	1	146	0	-0.532287	0.372569	1.58678	1.00985	2.16088	1.38134	0.584887	-0.273402	-0.652491	-1.02307	-1.01077	-0.918343	-0.806064	-0.593097	-1.00125	0.433278	-0.718813
780	chr1-147896794-147897791	89	chr1-147896794-147897791	998	0		0		intergenic	0	10164	0	-0.532287	0.372569	1.58678	1.00985	2.16088	1.38134	0.584887	-0.273402	-0.652491	-1.02307	-1.01077	-0.918343	-0.806064	-0.593097	-1.00125	0.433278	-0.718813
781	chr1-147762185-147763098	90	chr1-147762185-147763098	914	0	ENSG00000265107	1	GJA5	promoter	1	1578	0	-0.611042	-0.266499	-0.830114	-0.704615	-0.8721	-0.923871	-0.340581	-0.2942	0.45423	1.28207	0.758612	-0.109184	0.848116	-0.40525	3.1039	-0.495896	-0.593572
782	chr1-147764702-147765723	90	chr1-147764702-147765723	1022	0	ENSG00000265107	1	GJA5	intron	0	4095	0	-0.611042	-0.266499	-0.830114	-0.704615	-0.8721	-0.923871	-0.340581	-0.2942	0.45423	1.28207	0.758612	-0.109184	0.848116	-0.40525	3.1039	-0.495896	-0.593572
783	chr1-147771355-147772063	90	chr1-147771355-147772063	709	0	ENSG00000265107	1	GJA5	intron	0	1290	0	-0.611042	-0.266499	-0.830114	-0.704615	-0.8721	-0.923871	-0.340581	-0.2942	0.45423	1.28207	0.758612	-0.109184	0.848116	-0.40525	3.1039	-0.495896	-0.593572
784	chr1-147772410-147773840	90	chr1-147772410-147773840	1431	1	ENSG00000265107	1	GJA5	exon	1	0	0	-0.611042	-0.266499	-0.830114	-0.704615	-0.8721	-0.923871	-0.340581	-0.2942	0.45423	1.28207	0.758612	-0.109184	0.848116	-0.40525	3.1039	-0.495896	-0.593572
785	chr1-147780824-147781684	90	chr1-147780824-147781684	861	0		0		intergenic	0	7461	0	-0.611042	-0.266499	-0.830114	-0.704615	-0.8721	-0.923871	-0.340581	-0.2942	0.45423	1.28207	0.758612	-0.109184	0.848116	-0.40525	3.1039	-0.495896	-0.593572
786	chr1-147785935-147787166	90	chr1-147785935-147787166	1232	0		0		intergenic	0	12572	0	-0.611042	-0.266499	-0.830114	-0.704615	-0.8721	-0.923871	-0.340581	-0.2942	0.45423	1.28207	0.758612	-0.109184	0.848116	-0.40525	3.1039	-0.495896	-0.593572
787	chr1-147794387-147794959	90	chr1-147794387-147794959	573	0		0		intergenic	0	21024	0	-0.611042	-0.266499	-0.830114	-0.704615	-0.8721	-0.923871	-0.340581	-0.2942	0.45423	1.28207	0.758612	-0.109184	0.848116	-0.40525	3.1039	-0.495896	-0.593572
788	chr1-147877625-147878710	90	chr1-147877625-147878710	1086	0		0		intergenic	0	29245	0	-0.611042	-0.266499	-0.830114	-0.704615	-0.8721	-0.923871	-0.340581	-0.2942	0.45423	1.28207	0.758612	-0.109184	0.848116	-0.40525	3.1039	-0.495896	-0.593572
789	chr1-148158186-148159113	90	chr1-148158186-148159113	928	0		0		intergenic	0	5863	0	-0.611042	-0.266499	-0.830114	-0.704615	-0.8721	-0.923871	-0.340581	-0.2942	0.45423	1.28207	0.758612	-0.109184	0.848116	-0.40525	3.1039	-0.495896	-0.593572
790	chr1-14810468-14811893	115	chr1-14810468-14811893	1426	0	ENSG00000189337	1	KAZN	intron	0	112236	0	-1.082	-0.204156	-1.04266	-0.106971	-0.979613	-0.726264	-0.0165124	1.84252	1.63078	0.706948	1.54501	0.412262	1.20491	-0.665091	-0.939822	-0.608099	-0.971248
791	chr1-14825831-14826657	115	chr1-14825831-14826657	827	0	ENSG00000189337	1	KAZN	intron	0	97472	0	-1.082	-0.204156	-1.04266	-0.106971	-0.979613	-0.726264	-0.0165124	1.84252	1.63078	0.706948	1.54501	0.412262	1.20491	-0.665091	-0.939822	-0.608099	-0.971248
792	chr1-14928341-14928809	115	chr1-14928341-14928809	469	0	ENSG00000189337	1	KAZN	promoter	1	990	0	-1.082	-0.204156	-1.04266	-0.106971	-0.979613	-0.726264	-0.0165124	1.84252	1.63078	0.706948	1.54501	0.412262	1.20491	-0.665091	-0.939822	-0.608099	-0.971248
793	chr1-14929373-14930865	115	chr1-14929373-14930865	1493	1	ENSG00000189337	1	KAZN	exon	1	0	0	-1.082	-0.204156	-1.04266	-0.106971	-0.979613	-0.726264	-0.0165124	1.84252	1.63078	0.706948	1.54501	0.412262	1.20491	-0.665091	-0.939822	-0.608099	-0.971248
794	chr1-14942688-14943484	115	chr1-14942688-14943484	797	0	ENSG00000189337	1	KAZN	intron	0	2434	0	-1.082	-0.204156	-1.04266	-0.106971	-0.979613	-0.726264	-0.0165124	1.84252	1.63078	0.706948	1.54501	0.412262	1.20491	-0.665091	-0.939822	-0.608099	-0.971248
795	chr1-15030578-15031114	115	chr1-15030578-15031114	537	0	ENSG00000189337	1	KAZN	intron	0	84658	0	-1.082	-0.204156	-1.04266	-0.106971	-0.979613	-0.726264	-0.0165124	1.84252	1.63078	0.706948	1.54501	0.412262	1.20491	-0.665091	-0.939822	-0.608099	-0.971248
796	chr1-15155746-15156522	115	chr1-15155746-15156522	777	0	ENSG00000171729	1	TMEM51	intron	0	1956	0	-1.082	-0.204156	-1.04266	-0.106971	-0.979613	-0.726264	-0.0165124	1.84252	1.63078	0.706948	1.54501	0.412262	1.20491	-0.665091	-0.939822	-0.608099	-0.971248
797	chr1-15214255-15215323	115	chr1-15214255-15215323	1069	1	ENSG00000171729	1	TMEM51	exon	0	31948	0	-1.082	-0.204156	-1.04266	-0.106971	-0.979613	-0.726264	-0.0165124	1.84252	1.63078	0.706948	1.54501	0.412262	1.20491	-0.665091	-0.939822	-0.608099	-0.971248
798	chr1-15245472-15246435	115	chr1-15245472-15246435	964	0	ENSG00000142621	0	FHAD1	promoter	1	836	0	-1.082	-0.204156	-1.04266	-0.106971	-0.979613	-0.726264	-0.0165124	1.84252	1.63078	0.706948	1.54501	0.412262	1.20491	-0.665091	-0.939822	-0.608099	-0.971248
799	chr1-15287459-15288537	115	chr1-15287459-15288537	1079	0	ENSG00000142621	1	FHAD1	intron	0	413	0	-1.082	-0.204156	-1.04266	-0.106971	-0.979613	-0.726264	-0.0165124	1.84252	1.63078	0.706948	1.54501	0.412262	1.20491	-0.665091	-0.939822	-0.608099	-0.971248
800	chr1-15324197-15325023	115	chr1-15324197-15325023	827	1	ENSG00000142621	1	FHAD1	exon	1	0	0	-1.082	-0.204156	-1.04266	-0.106971	-0.979613	-0.726264	-0.0165124	1.84252	1.63078	0.706948	1.54501	0.412262	1.20491	-0.665091	-0.939822	-0.608099	-0.971248
801	chr1-15326509-15327602	115	chr1-15326509-15327602	1094	1	ENSG00000142621	1	FHAD1	exon	1	0	0	-1.082	-0.204156	-1.04266	-0.106971	-0.979613	-0.726264	-0.0165124	1.84252	1.63078	0.706948	1.54501	0.412262	1.20491	-0.665091	-0.939822	-0.608099	-0.971248
802	chr1-15328204-15329378	115	chr1-15328204-15329378	1175	1	ENSG00000142621	1	FHAD1	exon	0	1083	0	-1.082	-0.204156	-1.04266	-0.106971	-0.979613	-0.726264	-0.0165124	1.84252	1.63078	0.706948	1.54501	0.412262	1.20491	-0.665091	-0.939822	-0.608099	-0.971248
803	chr1-15384244-15384788	115	chr1-15384244-15384788	545	1	ENSG00000142621	1	FHAD1	exon	0	866	0	-1.082	-0.204156	-1.04266	-0.106971	-0.979613	-0.726264	-0.0165124	1.84252	1.63078	0.706948	1.54501	0.412262	1.20491	-0.665091	-0.939822	-0.608099	-0.971248
804	chr1-15407020-15407472	115	chr1-15407020-15407472	453	0		0		intergenic	0	2422	0	-1.082	-0.204156	-1.04266	-0.106971	-0.979613	-0.726264	-0.0165124	1.84252	1.63078	0.706948	1.54501	0.412262	1.20491	-0.665091	-0.939822	-0.608099	-0.971248
805	chr1-15420950-15421979	115	chr1-15420950-15421979	1030	0	ENSG00000142634	1	EFHD2	intron	0	10684	0	-1.082	-0.204156	-1.04266	-0.106971	-0.979613	-0.726264	-0.0165124	1.84252	1.63078	0.706948	1.54501	0.412262	1.20491	-0.665091	-0.939822	-0.608099	-0.971248
806	chr1-15432134-15432946	115	chr1-15432134-15432946	813	0		0		intergenic	0	5492	0	-1.082	-0.204156	-1.04266	-0.106971	-0.979613	-0.726264	-0.0165124	1.84252	1.63078	0.706948	1.54501	0.412262	1.20491	-0.665091	-0.939822	-0.608099	-0.971248
807	chr1-15475504-15476246	115	chr1-15475504-15476246	743	1	ENSG00000215704	1	CELA2B	exon	1	0	0	-1.082	-0.204156	-1.04266	-0.106971	-0.979613	-0.726264	-0.0165124	1.84252	1.63078	0.706948	1.54501	0.412262	1.20491	-0.665091	-0.939822	-0.608099	-0.971248
808	chr1-15703096-15704154	115	chr1-15703096-15704154	1059	0	ENSG00000116786	1	PLEKHM2	intron	0	18554	0	-1.082	-0.204156	-1.04266	-0.106971	-0.979613	-0.726264	-0.0165124	1.84252	1.63078	0.706948	1.54501	0.412262	1.20491	-0.665091	-0.939822	-0.608099	-0.971248
809	chr1-14920955-14921360	147	chr1-14920955-14921360	406	0	ENSG00000189337	1	KAZN	intron	0	2769	0	-0.766324	-0.541097	-0.0865724	0.340971	0.116127	0.16847	0.453913	-0.615417	-0.837321	-0.19872	-1.22031	-1.22225	-0.968282	2.41227	2.12301	0.539094	0.302431
810	chr1-14968176-14969056	147	chr1-14968176-14969056	881	0	ENSG00000189337	1	KAZN	intron	0	22256	0	-0.766324	-0.541097	-0.0865724	0.340971	0.116127	0.16847	0.453913	-0.615417	-0.837321	-0.19872	-1.22031	-1.22225	-0.968282	2.41227	2.12301	0.539094	0.302431
811	chr1-14980264-14981266	147	chr1-14980264-14981266	1003	0	ENSG00000189337	1	KAZN	intron	0	34344	0	-0.766324	-0.541097	-0.0865724	0.340971	0.116127	0.16847	0.453913	-0.615417	-0.837321	-0.19872	-1.22031	-1.22225	-0.968282	2.41227	2.12301	0.539094	0.302431
812	chr1-15020924-15021862	147	chr1-15020924-15021862	939	0	ENSG00000189337	1	KAZN	intron	0	75004	0	-0.766324	-0.541097	-0.0865724	0.340971	0.116127	0.16847	0.453913	-0.615417	-0.837321	-0.19872	-1.22031	-1.22225	-0.968282	2.41227	2.12301	0.539094	0.302431
813	chr1-15068053-15068678	147	chr1-15068053-15068678	626	1	ENSG00000189337	1	KAZN	exon	0	83853	0	-0.766324	-0.541097	-0.0865724	0.340971	0.116127	0.16847	0.453913	-0.615417	-0.837321	-0.19872	-1.22031	-1.22225	-0.968282	2.41227	2.12301	0.539094	0.302431
814	chr1-15188500-15189061	147	chr1-15188500-15189061	562	0	ENSG00000171729	1	TMEM51	intron	0	34710	0	-0.766324	-0.541097	-0.0865724	0.340971	0.116127	0.16847	0.453913	-0.615417	-0.837321	-0.19872	-1.22031	-1.22225	-0.968282	2.41227	2.12301	0.539094	0.302431
815	chr1-15223924-15224640	147	chr1-15223924-15224640	717	0		0		intergenic	0	22631	0	-0.766324	-0.541097	-0.0865724	0.340971	0.116127	0.16847	0.453913	-0.615417	-0.837321	-0.19872	-1.22031	-1.22225	-0.968282	2.41227	2.12301	0.539094	0.302431
816	chr1-15231483-15232035	147	chr1-15231483-15232035	553	0		0		intergenic	0	15236	0	-0.766324	-0.541097	-0.0865724	0.340971	0.116127	0.16847	0.453913	-0.615417	-0.837321	-0.19872	-1.22031	-1.22225	-0.968282	2.41227	2.12301	0.539094	0.302431
817	chr1-15260815-15261967	147	chr1-15260815-15261967	1153	0	ENSG00000142621	1	FHAD1	intron	0	9029	0	-0.766324	-0.541097	-0.0865724	0.340971	0.116127	0.16847	0.453913	-0.615417	-0.837321	-0.19872	-1.22031	-1.22225	-0.968282	2.41227	2.12301	0.539094	0.302431
818	chr1-15345615-15346225	147	chr1-15345615-15346225	611	0	ENSG00000142621	1	FHAD1	intron	0	154	0	-0.766324	-0.541097	-0.0865724	0.340971	0.116127	0.16847	0.453913	-0.615417	-0.837321	-0.19872	-1.22031	-1.22225	-0.968282	2.41227	2.12301	0.539094	0.302431
819	chr1-15411439-15411991	147	chr1-15411439-15411991	553	0	ENSG00000142634	1	EFHD2	intron	0	1173	0	-0.766324	-0.541097	-0.0865724	0.340971	0.116127	0.16847	0.453913	-0.615417	-0.837321	-0.19872	-1.22031	-1.22225	-0.968282	2.41227	2.12301	0.539094	0.302431
820	chr1-15415897-15416593	147	chr1-15415897-15416593	697	0	ENSG00000142634	1	EFHD2	intron	0	5631	0	-0.766324	-0.541097	-0.0865724	0.340971	0.116127	0.16847	0.453913	-0.615417	-0.837321	-0.19872	-1.22031	-1.22225	-0.968282	2.41227	2.12301	0.539094	0.302431
821	chr1-15417427-15417807	147	chr1-15417427-15417807	381	0	ENSG00000142634	1	EFHD2	intron	0	7161	0	-0.766324	-0.541097	-0.0865724	0.340971	0.116127	0.16847	0.453913	-0.615417	-0.837321	-0.19872	-1.22031	-1.22225	-0.968282	2.41227	2.12301	0.539094	0.302431
822	chr1-15682274-15682539	147	chr1-15682274-15682539	266	0	ENSG00000116786	0	PLEKHM2	promoter	1	1792	0	-0.766324	-0.541097	-0.0865724	0.340971	0.116127	0.16847	0.453913	-0.615417	-0.837321	-0.19872	-1.22031	-1.22225	-0.968282	2.41227	2.12301	0.539094	0.302431
823	chr1-15696824-15697614	147	chr1-15696824-15697614	791	0	ENSG00000116786	1	PLEKHM2	intron	0	12282	0	-0.766324	-0.541097	-0.0865724	0.340971	0.116127	0.16847	0.453913	-0.615417	-0.837321	-0.19872	-1.22031	-1.22225	-0.968282	2.41227	2.12301	0.539094	0.302431
824	chr1-15749105-15750148	147	chr1-15749105-15750148	1044	0		0		intergenic	0	6458	0	-0.766324	-0.541097	-0.0865724	0.340971	0.116127	0.16847	0.453913	-0.615417	-0.837321	-0.19872	-1.22031	-1.22225	-0.968282	2.41227	2.12301	0.539094	0.302431
825	chr1-15795030-15795640	147	chr1-15795030-15795640	611	0		0		intergenic	0	13707	0	-0.766324	-0.541097	-0.0865724	0.340971	0.116127	0.16847	0.453913	-0.615417	-0.837321	-0.19872	-1.22031	-1.22225	-0.968282	2.41227	2.12301	0.539094	0.302431
826	chr1-15796390-15797062	147	chr1-15796390-15797062	673	0		0		intergenic	0	12285	0	-0.766324	-0.541097	-0.0865724	0.340971	0.116127	0.16847	0.453913	-0.615417	-0.837321	-0.19872	-1.22031	-1.22225	-0.968282	2.41227	2.12301	0.539094	0.302431
827	chr1-15836938-15837641	147	chr1-15836938-15837641	704	0		0		intergenic	0	10222	0	-0.766324	-0.541097	-0.0865724	0.340971	0.116127	0.16847	0.453913	-0.615417	-0.837321	-0.19872	-1.22031	-1.22225	-0.968282	2.41227	2.12301	0.539094	0.302431
828	chr1-15939116-15939926	147	chr1-15939116-15939926	811	1	ENSG00000065526	1	SPEN	exon	0	532	0	-0.766324	-0.541097	-0.0865724	0.340971	0.116127	0.16847	0.453913	-0.615417	-0.837321	-0.19872	-1.22031	-1.22225	-0.968282	2.41227	2.12301	0.539094	0.302431
829	chr1-15948932-15950246	147	chr1-15948932-15950246	1315	0	ENSG00000116809	1	ZBTB17	promoter	1	1639	0	-0.766324	-0.541097	-0.0865724	0.340971	0.116127	0.16847	0.453913	-0.615417	-0.837321	-0.19872	-1.22031	-1.22225	-0.968282	2.41227	2.12301	0.539094	0.302431
830	chr1-15952470-15953053	147	chr1-15952470-15953053	584	1	ENSG00000116809	1	ZBTB17	exon	1	0	0	-0.766324	-0.541097	-0.0865724	0.340971	0.116127	0.16847	0.453913	-0.615417	-0.837321	-0.19872	-1.22031	-1.22225	-0.968282	2.41227	2.12301	0.539094	0.302431
831	chr1-15965253-15965945	147	chr1-15965253-15965945	693	0	ENSG00000116809	1	ZBTB17	intron	0	10133	0	-0.766324	-0.541097	-0.0865724	0.340971	0.116127	0.16847	0.453913	-0.615417	-0.837321	-0.19872	-1.22031	-1.22225	-0.968282	2.41227	2.12301	0.539094	0.302431
832	chr1-15966021-15966607	147	chr1-15966021-15966607	587	0	ENSG00000116809	1	ZBTB17	intron	0	9471	0	-0.766324	-0.541097	-0.0865724	0.340971	0.116127	0.16847	0.453913	-0.615417	-0.837321	-0.19872	-1.22031	-1.22225	-0.968282	2.41227	2.12301	0.539094	0.302431
833	chr1-16021459-16022326	147	chr1-16021459-16022326	868	1	ENSG00000186510	1	CLCNKA	exon	1	0	0	-0.766324	-0.541097	-0.0865724	0.340971	0.116127	0.16847	0.453913	-0.615417	-0.837321	-0.19872	-1.22031	-1.22225	-0.968282	2.41227	2.12301	0.539094	0.302431
834	chr1-16043264-16044033	147	chr1-16043264-16044033	770	1	ENSG00000184908	1	CLCNKB	exon	1	0	0	-0.766324	-0.541097	-0.0865724	0.340971	0.116127	0.16847	0.453913	-0.615417	-0.837321	-0.19872	-1.22031	-1.22225	-0.968282	2.41227	2.12301	0.539094	0.302431
835	chr1-16114549-16115148	147	chr1-16114549-16115148	600	0		0		intergenic	0	18413	0	-0.766324	-0.541097	-0.0865724	0.340971	0.116127	0.16847	0.453913	-0.615417	-0.837321	-0.19872	-1.22031	-1.22225	-0.968282	2.41227	2.12301	0.539094	0.302431
836	chr1-16115524-16116429	147	chr1-16115524-16116429	906	0		0		intergenic	0	17132	0	-0.766324	-0.541097	-0.0865724	0.340971	0.116127	0.16847	0.453913	-0.615417	-0.837321	-0.19872	-1.22031	-1.22225	-0.968282	2.41227	2.12301	0.539094	0.302431
837	chr1-16138411-16139379	147	chr1-16138411-16139379	969	1	ENSG00000142627	1	EPHA2	exon	0	4848	0	-0.766324	-0.541097	-0.0865724	0.340971	0.116127	0.16847	0.453913	-0.615417	-0.837321	-0.19872	-1.22031	-1.22225	-0.968282	2.41227	2.12301	0.539094	0.302431
838	chr1-16143741-16144247	147	chr1-16143741-16144247	507	0	ENSG00000142627	1	EPHA2	intron	0	2202	0	-0.766324	-0.541097	-0.0865724	0.340971	0.116127	0.16847	0.453913	-0.615417	-0.837321	-0.19872	-1.22031	-1.22225	-0.968282	2.41227	2.12301	0.539094	0.302431
839	chr1-16151219-16151599	147	chr1-16151219-16151599	381	0	ENSG00000142627	1	EPHA2	intron	0	4452	0	-0.766324	-0.541097	-0.0865724	0.340971	0.116127	0.16847	0.453913	-0.615417	-0.837321	-0.19872	-1.22031	-1.22225	-0.968282	2.41227	2.12301	0.539094	0.302431
840	chr1-16152485-16153065	147	chr1-16152485-16153065	581	0	ENSG00000142627	1	EPHA2	intron	0	2986	0	-0.766324	-0.541097	-0.0865724	0.340971	0.116127	0.16847	0.453913	-0.615417	-0.837321	-0.19872	-1.22031	-1.22225	-0.968282	2.41227	2.12301	0.539094	0.302431
841	chr1-16173086-16173873	147	chr1-16173086-16173873	788	0		0		intergenic	0	16998	0	-0.766324	-0.541097	-0.0865724	0.340971	0.116127	0.16847	0.453913	-0.615417	-0.837321	-0.19872	-1.22031	-1.22225	-0.968282	2.41227	2.12301	0.539094	0.302431
842	chr1-16209903-16210434	147	chr1-16209903-16210434	532	0	ENSG00000142632	1	ARHGEF19	intron	0	2174	0	-0.766324	-0.541097	-0.0865724	0.340971	0.116127	0.16847	0.453913	-0.615417	-0.837321	-0.19872	-1.22031	-1.22225	-0.968282	2.41227	2.12301	0.539094	0.302431
843	chr1-16212162-16212893	147	chr1-16212162-16212893	732	1	ENSG00000142632	1	ARHGEF19	exon	1	0	0	-0.766324	-0.541097	-0.0865724	0.340971	0.116127	0.16847	0.453913	-0.615417	-0.837321	-0.19872	-1.22031	-1.22225	-0.968282	2.41227	2.12301	0.539094	0.302431
844	chr1-16248164-16249363	147	chr1-16248164-16249363	1200	1	ENSG00000037637	1	FBXO42	exon	0	4063	0	-0.766324	-0.541097	-0.0865724	0.340971	0.116127	0.16847	0.453913	-0.615417	-0.837321	-0.19872	-1.22031	-1.22225	-0.968282	2.41227	2.12301	0.539094	0.302431
845	chr1-16371762-16372061	147	chr1-16371762-16372061	300	0	ENSG00000055070	1	SZRD1	intron	0	4050	0	-0.766324	-0.541097	-0.0865724	0.340971	0.116127	0.16847	0.453913	-0.615417	-0.837321	-0.19872	-1.22031	-1.22225	-0.968282	2.41227	2.12301	0.539094	0.302431
846	chr1-16443759-16444291	147	chr1-16443759-16444291	533	0	ENSG00000157191	1	NECAP2	intron	0	2986	0	-0.766324	-0.541097	-0.0865724	0.340971	0.116127	0.16847	0.453913	-0.615417	-0.837321	-0.19872	-1.22031	-1.22225	-0.968282	2.41227	2.12301	0.539094	0.302431
847	chr1-149986078-149987226	100	chr1-149986078-149987226	1149	0	ENSG00000264522	1	OTUD7B	intron	0	14816	0	-0.969699	0.895362	-0.842909	-0.610598	-1.18046	-0.995211	-0.426922	0.789625	1.23943	0.961915	1.512	1.83431	0.0358127	0.498742	-1.1406	-0.942461	-0.658343
848	chr1-150061423-150062085	100	chr1-150061423-150062085	663	0		0		intergenic	0	5207	0	-0.969699	0.895362	-0.842909	-0.610598	-1.18046	-0.995211	-0.426922	0.789625	1.23943	0.961915	1.512	1.83431	0.0358127	0.498742	-1.1406	-0.942461	-0.658343
849	chr1-150137743-150138712	100	chr1-150137743-150138712	970	0	ENSG00000136631	1	VPS45	intron	0	10470	0	-0.969699	0.895362	-0.842909	-0.610598	-1.18046	-0.995211	-0.426922	0.789625	1.23943	0.961915	1.512	1.83431	0.0358127	0.498742	-1.1406	-0.942461	-0.658343
850	chr1-150162248-150163681	100	chr1-150162248-150163681	1434	0	ENSG00000023902	1	PLEKHO1	intron	0	2842	0	-0.969699	0.895362	-0.842909	-0.610598	-1.18046	-0.995211	-0.426922	0.789625	1.23943	0.961915	1.512	1.83431	0.0358127	0.498742	-1.1406	-0.942461	-0.658343
851	chr1-150272129-150272955	100	chr1-150272129-150272955	827	1	ENSG00000118292	1	C1orf54	exon	1	0	0	-0.969699	0.895362	-0.842909	-0.610598	-1.18046	-0.995211	-0.426922	0.789625	1.23943	0.961915	1.512	1.83431	0.0358127	0.498742	-1.1406	-0.942461	-0.658343
852	chr1-150473494-150474218	100	chr1-150473494-150474218	725	1	ENSG00000163125	1	RPRD2	exon	0	13145	0	-0.969699	0.895362	-0.842909	-0.610598	-1.18046	-0.995211	-0.426922	0.789625	1.23943	0.961915	1.512	1.83431	0.0358127	0.498742	-1.1406	-0.942461	-0.658343
853	chr1-150474442-150475338	100	chr1-150474442-150475338	897	1	ENSG00000163125	1	RPRD2	exon	0	12025	0	-0.969699	0.895362	-0.842909	-0.610598	-1.18046	-0.995211	-0.426922	0.789625	1.23943	0.961915	1.512	1.83431	0.0358127	0.498742	-1.1406	-0.942461	-0.658343
854	chr1-150476192-150477202	100	chr1-150476192-150477202	1011	1	ENSG00000163125	1	RPRD2	exon	0	10161	0	-0.969699	0.895362	-0.842909	-0.610598	-1.18046	-0.995211	-0.426922	0.789625	1.23943	0.961915	1.512	1.83431	0.0358127	0.498742	-1.1406	-0.942461	-0.658343
855	chr1-150532185-150533036	100	chr1-150532185-150533036	852	0		0		intergenic	0	16332	0	-0.969699	0.895362	-0.842909	-0.610598	-1.18046	-0.995211	-0.426922	0.789625	1.23943	0.961915	1.512	1.83431	0.0358127	0.498742	-1.1406	-0.942461	-0.658343
856	chr1-150552042-150552910	100	chr1-150552042-150552910	869	1	ENSG00000143382	1	ADAMTSL4	exon	1	0	0	-0.969699	0.895362	-0.842909	-0.610598	-1.18046	-0.995211	-0.426922	0.789625	1.23943	0.961915	1.512	1.83431	0.0358127	0.498742	-1.1406	-0.942461	-0.658343
857	chr1-150567313-150568642	100	chr1-150567313-150568642	1330	0		0		intergenic	0	9058	0	-0.969699	0.895362	-0.842909	-0.610598	-1.18046	-0.995211	-0.426922	0.789625	1.23943	0.961915	1.512	1.83431	0.0358127	0.498742	-1.1406	-0.942461	-0.658343
858	chr1-150609446-150610181	100	chr1-150609446-150610181	736	0	ENSG00000143420	1	ENSA	intron	0	18934	0	-0.969699	0.895362	-0.842909	-0.610598	-1.18046	-0.995211	-0.426922	0.789625	1.23943	0.961915	1.512	1.83431	0.0358127	0.498742	-1.1406	-0.942461	-0.658343
859	chr1-150979089-150979920	100	chr1-150979089-150979920	832	0		0		intergenic	0	2096	0	-0.969699	0.895362	-0.842909	-0.610598	-1.18046	-0.995211	-0.426922	0.789625	1.23943	0.961915	1.512	1.83431	0.0358127	0.498742	-1.1406	-0.942461	-0.658343
860	chr1-149997394-149997965	99	chr1-149997394-149997965	572	0	ENSG00000264522	1	OTUD7B	intron	0	12709	0	-0.362553	-0.427221	-0.388183	-0.351444	-0.232716	-0.359473	-0.328356	0.413677	0.146318	-0.287355	-0.231538	-0.383397	0.0320649	3.88336	-0.0685052	-0.562983	-0.491699
861	chr1-150158645-150159514	99	chr1-150158645-150159514	870	1	ENSG00000023902	1	PLEKHO1	exon	1	0	0	-0.362553	-0.427221	-0.388183	-0.351444	-0.232716	-0.359473	-0.328356	0.413677	0.146318	-0.287355	-0.231538	-0.383397	0.0320649	3.88336	-0.0685052	-0.562983	-0.491699
862	chr1-150159576-150159792	99	chr1-150159576-150159792	217	1	ENSG00000023902	1	PLEKHO1	exon	0	170	0	-0.362553	-0.427221	-0.388183	-0.351444	-0.232716	-0.359473	-0.328356	0.413677	0.146318	-0.287355	-0.231538	-0.383397	0.0320649	3.88336	-0.0685052	-0.562983	-0.491699
863	chr1-150160346-150160736	99	chr1-150160346-150160736	391	0	ENSG00000023902	1	PLEKHO1	intron	0	940	0	-0.362553	-0.427221	-0.388183	-0.351444	-0.232716	-0.359473	-0.328356	0.413677	0.146318	-0.287355	-0.231538	-0.383397	0.0320649	3.88336	-0.0685052	-0.562983	-0.491699
864	chr1-150186700-150187805	99	chr1-150186700-150187805	1106	0		0		intergenic	0	27294	0	-0.362553	-0.427221	-0.388183	-0.351444	-0.232716	-0.359473	-0.328356	0.413677	0.146318	-0.287355	-0.231538	-0.383397	0.0320649	3.88336	-0.0685052	-0.562983	-0.491699
865	chr1-150109524-150110637	98	chr1-150109524-150110637	1114	1	ENSG00000136631	1	VPS45	exon	0	348	0	-0.00314716	-0.388199	-0.402971	-0.353222	-0.231915	-0.438504	-0.14778	-0.480781	-0.509903	-0.296784	-0.414987	-0.417788	-0.409592	1.19475	3.69589	-0.330559	-0.0645105
866	chr1-150151926-150152392	98	chr1-150151926-150152392	467	0	ENSG00000023902	1	PLEKHO1	promoter	1	1090	0	-0.00314716	-0.388199	-0.402971	-0.353222	-0.231915	-0.438504	-0.14778	-0.480781	-0.509903	-0.296784	-0.414987	-0.417788	-0.409592	1.19475	3.69589	-0.330559	-0.0645105
867	chr1-150152722-150153062	98	chr1-150152722-150153062	341	1	ENSG00000023902	1	PLEKHO1	exon	1	420	0	-0.00314716	-0.388199	-0.402971	-0.353222	-0.231915	-0.438504	-0.14778	-0.480781	-0.509903	-0.296784	-0.414987	-0.417788	-0.409592	1.19475	3.69589	-0.330559	-0.0645105
868	chr1-150558871-150559208	106	chr1-150558871-150559208	338	1	ENSG00000143382	1	ADAMTSL4	exon	0	616	0	-0.210057	-0.394086	-0.479356	-0.404776	-0.468948	-0.457323	-0.441485	-0.308216	-0.374134	-0.00516054	-0.405936	-0.20494	-0.551236	3.62926	1.35058	-0.091746	-0.182446
869	chr1-150611303-150611923	106	chr1-150611303-150611923	621	0	ENSG00000143420	1	ENSA	intron	0	17192	0	-0.210057	-0.394086	-0.479356	-0.404776	-0.468948	-0.457323	-0.441485	-0.308216	-0.374134	-0.00516054	-0.405936	-0.20494	-0.551236	3.62926	1.35058	-0.091746	-0.182446
870	chr1-150613084-150613900	106	chr1-150613084-150613900	817	0	ENSG00000143420	1	ENSA	intron	0	15215	0	-0.210057	-0.394086	-0.479356	-0.404776	-0.468948	-0.457323	-0.441485	-0.308216	-0.374134	-0.00516054	-0.405936	-0.20494	-0.551236	3.62926	1.35058	-0.091746	-0.182446
871	chr1-150791636-150791912	106	chr1-150791636-150791912	277	0		0		intergenic	0	14855	0	-0.210057	-0.394086	-0.479356	-0.404776	-0.468948	-0.457323	-0.441485	-0.308216	-0.374134	-0.00516054	-0.405936	-0.20494	-0.551236	3.62926	1.35058	-0.091746	-0.182446
872	chr1-150977189-150977591	106	chr1-150977189-150977591	403	0		0		intergenic	0	2184	0	-0.210057	-0.394086	-0.479356	-0.404776	-0.468948	-0.457323	-0.441485	-0.308216	-0.374134	-0.00516054	-0.405936	-0.20494	-0.551236	3.62926	1.35058	-0.091746	-0.182446
873	chr1-151024364-151025114	106	chr1-151024364-151025114	751	1	ENSG00000143363	1	PRUNE1	exon	1	0	0	-0.210057	-0.394086	-0.479356	-0.404776	-0.468948	-0.457323	-0.441485	-0.308216	-0.374134	-0.00516054	-0.405936	-0.20494	-0.551236	3.62926	1.35058	-0.091746	-0.182446
874	chr1-151155582-151156709	106	chr1-151155582-151156709	1128	1	ENSG00000163156	1	SCNM1	exon	1	0	0	-0.210057	-0.394086	-0.479356	-0.404776	-0.468948	-0.457323	-0.441485	-0.308216	-0.374134	-0.00516054	-0.405936	-0.20494	-0.551236	3.62926	1.35058	-0.091746	-0.182446
875	chr1-151157064-151157512	106	chr1-151157064-151157512	449	0	ENSG00000163156	1	SCNM1	intron	0	399	0	-0.210057	-0.394086	-0.479356	-0.404776	-0.468948	-0.457323	-0.441485	-0.308216	-0.374134	-0.00516054	-0.405936	-0.20494	-0.551236	3.62926	1.35058	-0.091746	-0.182446
876	chr1-151158943-151159632	106	chr1-151158943-151159632	690	1	ENSG00000163156	1	SCNM1	exon	0	2278	0	-0.210057	-0.394086	-0.479356	-0.404776	-0.468948	-0.457323	-0.441485	-0.308216	-0.374134	-0.00516054	-0.405936	-0.20494	-0.551236	3.62926	1.35058	-0.091746	-0.182446
877	chr1-150563702-150563918	103	chr1-150563702-150563918	217	0		0		intergenic	0	5447	0	-0.344879	0.481183	1.56169	0.98703	2.08977	1.82778	0.401346	-0.622136	-0.837567	-0.551215	-0.972496	-0.865381	-0.914482	-0.382906	-0.792226	-0.306707	-0.758805
878	chr1-150619424-150620389	103	chr1-150619424-150620389	966	0	ENSG00000143420	1	ENSA	intron	0	8726	0	-0.344879	0.481183	1.56169	0.98703	2.08977	1.82778	0.401346	-0.622136	-0.837567	-0.551215	-0.972496	-0.865381	-0.914482	-0.382906	-0.792226	-0.306707	-0.758805
879	chr1-150649968-150650588	103	chr1-150649968-150650588	621	0	ENSG00000143457	1	GOLPH3L	intron	0	20355	0	-0.344879	0.481183	1.56169	0.98703	2.08977	1.82778	0.401346	-0.622136	-0.837567	-0.551215	-0.972496	-0.865381	-0.914482	-0.382906	-0.792226	-0.306707	-0.758805
880	chr1-150709676-150711026	103	chr1-150709676-150711026	1351	0	ENSG00000143452	1	HORMAD1	intron	0	2852	0	-0.344879	0.481183	1.56169	0.98703	2.08977	1.82778	0.401346	-0.622136	-0.837567	-0.551215	-0.972496	-0.865381	-0.914482	-0.382906	-0.792226	-0.306707	-0.758805
881	chr1-150886552-150887447	103	chr1-150886552-150887447	896	1	ENSG00000283324	1	RP11-235D19.4	exon	1	0	0	-0.344879	0.481183	1.56169	0.98703	2.08977	1.82778	0.401346	-0.622136	-0.837567	-0.551215	-0.972496	-0.865381	-0.914482	-0.382906	-0.792226	-0.306707	-0.758805
882	chr1-150919290-150920187	103	chr1-150919290-150920187	898	0		0		intergenic	0	6075	0	-0.344879	0.481183	1.56169	0.98703	2.08977	1.82778	0.401346	-0.622136	-0.837567	-0.551215	-0.972496	-0.865381	-0.914482	-0.382906	-0.792226	-0.306707	-0.758805
883	chr1-151056274-151056797	103	chr1-151056274-151056797	524	1	ENSG00000213190	1	MLLT11	exon	1	960	0	-0.344879	0.481183	1.56169	0.98703	2.08977	1.82778	0.401346	-0.622136	-0.837567	-0.551215	-0.972496	-0.865381	-0.914482	-0.382906	-0.792226	-0.306707	-0.758805
884	chr1-150571998-150572525	102	chr1-150571998-150572525	528	0		0		intergenic	0	6251	0	-1.54226	-0.329497	0.56605	0.787449	1.32864	0.373915	0.728804	1.2293	0.924101	0.0787236	0.586909	0.803127	-0.940062	-0.147338	-1.8625	-1.12099	-1.46437
885	chr1-150573064-150573506	102	chr1-150573064-150573506	443	0		0		intergenic	0	5270	0	-1.54226	-0.329497	0.56605	0.787449	1.32864	0.373915	0.728804	1.2293	0.924101	0.0787236	0.586909	0.803127	-0.940062	-0.147338	-1.8625	-1.12099	-1.46437
886	chr1-150573587-150573979	102	chr1-150573587-150573979	393	0		0		intergenic	0	4797	0	-1.54226	-0.329497	0.56605	0.787449	1.32864	0.373915	0.728804	1.2293	0.924101	0.0787236	0.586909	0.803127	-0.940062	-0.147338	-1.8625	-1.12099	-1.46437
887	chr1-150574609-150575006	102	chr1-150574609-150575006	398	1	ENSG00000143384	1	MCL1	exon	0	3770	0	-1.54226	-0.329497	0.56605	0.787449	1.32864	0.373915	0.728804	1.2293	0.924101	0.0787236	0.586909	0.803127	-0.940062	-0.147338	-1.8625	-1.12099	-1.46437
888	chr1-151309526-151310552	108	chr1-151309526-151310552	1027	1	ENSG00000143393	1	PI4KB	exon	0	3092	0	-0.0962164	0.0797522	-0.186564	-0.0318657	0.0401218	-0.344276	0.0726343	2.7014	2.38839	-0.528528	0.0885508	-0.367708	-0.275978	-1.07842	-1.07075	-0.543072	-0.847477
889	chr1-151367411-151368374	108	chr1-151367411-151368374	964	1	ENSG00000143416	1	SELENBP1	exon	1	0	0	-0.0962164	0.0797522	-0.186564	-0.0318657	0.0401218	-0.344276	0.0726343	2.7014	2.38839	-0.528528	0.0885508	-0.367708	-0.275978	-1.07842	-1.07075	-0.543072	-0.847477
890	chr1-151523083-151523653	108	chr1-151523083-151523653	571	1	ENSG00000143375	1	CGN	exon	1	1940	0	-0.0962164	0.0797522	-0.186564	-0.0318657	0.0401218	-0.344276	0.0726343	2.7014	2.38839	-0.528528	0.0885508	-0.367708	-0.275978	-1.07842	-1.07075	-0.543072	-0.847477
891	chr1-151585319-151586382	108	chr1-151585319-151586382	1064	0		0		intergenic	0	19396	0	-0.0962164	0.0797522	-0.186564	-0.0318657	0.0401218	-0.344276	0.0726343	2.7014	2.38839	-0.528528	0.0885508	-0.367708	-0.275978	-1.07842	-1.07075	-0.543072	-0.847477
892	chr1-151855417-151856380	108	chr1-151855417-151856380	964	0	ENSG00000196407	0	THEM5	promoter	1	1719	0	-0.0962164	0.0797522	-0.186564	-0.0318657	0.0401218	-0.344276	0.0726343	2.7014	2.38839	-0.528528	0.0885508	-0.367708	-0.275978	-1.07842	-1.07075	-0.543072	-0.847477
893	chr1-151494590-151495758	109	chr1-151494590-151495758	1169	0		0		intergenic	0	14751	0	-0.46999	1.49345	0.891852	0.161508	0.426872	0.40484	0.391414	-0.67383	-0.660898	-0.97683	-0.882514	-0.92642	-0.716132	-0.640476	-0.0918188	2.90086	-0.631893
894	chr1-151512788-151513401	109	chr1-151512788-151513401	614	0	ENSG00000143375	1	CGN	intron	0	1390	0	-0.46999	1.49345	0.891852	0.161508	0.426872	0.40484	0.391414	-0.67383	-0.660898	-0.97683	-0.882514	-0.92642	-0.716132	-0.640476	-0.0918188	2.90086	-0.631893
895	chr1-151513551-151514107	109	chr1-151513551-151514107	557	0	ENSG00000143375	1	CGN	intron	0	2153	0	-0.46999	1.49345	0.891852	0.161508	0.426872	0.40484	0.391414	-0.67383	-0.660898	-0.97683	-0.882514	-0.92642	-0.716132	-0.640476	-0.0918188	2.90086	-0.631893
896	chr1-151516095-151516513	109	chr1-151516095-151516513	419	0	ENSG00000143375	1	CGN	intron	0	2856	0	-0.46999	1.49345	0.891852	0.161508	0.426872	0.40484	0.391414	-0.67383	-0.660898	-0.97683	-0.882514	-0.92642	-0.716132	-0.640476	-0.0918188	2.90086	-0.631893
897	chr1-151546878-151548027	109	chr1-151546878-151548027	1150	0	ENSG00000143367	1	TUFT1	intron	0	6543	0	-0.46999	1.49345	0.891852	0.161508	0.426872	0.40484	0.391414	-0.67383	-0.660898	-0.97683	-0.882514	-0.92642	-0.716132	-0.640476	-0.0918188	2.90086	-0.631893
898	chr1-151828558-151829659	109	chr1-151828558-151829659	1102	1	ENSG00000143365	1	RORC	exon	0	2212	0	-0.46999	1.49345	0.891852	0.161508	0.426872	0.40484	0.391414	-0.67383	-0.660898	-0.97683	-0.882514	-0.92642	-0.716132	-0.640476	-0.0918188	2.90086	-0.631893
899	chr1-151830493-151831041	109	chr1-151830493-151831041	549	0	ENSG00000143365	1	RORC	intron	0	830	0	-0.46999	1.49345	0.891852	0.161508	0.426872	0.40484	0.391414	-0.67383	-0.660898	-0.97683	-0.882514	-0.92642	-0.716132	-0.640476	-0.0918188	2.90086	-0.631893
900	chr1-151831508-151831946	109	chr1-151831508-151831946	439	1	ENSG00000143365	1	RORC	exon	1	0	0	-0.46999	1.49345	0.891852	0.161508	0.426872	0.40484	0.391414	-0.67383	-0.660898	-0.97683	-0.882514	-0.92642	-0.716132	-0.640476	-0.0918188	2.90086	-0.631893
901	chr1-151832475-151832978	109	chr1-151832475-151832978	504	0	ENSG00000143365	0	RORC	promoter	1	602	0	-0.46999	1.49345	0.891852	0.161508	0.426872	0.40484	0.391414	-0.67383	-0.660898	-0.97683	-0.882514	-0.92642	-0.716132	-0.640476	-0.0918188	2.90086	-0.631893
902	chr1-151836300-151837161	109	chr1-151836300-151837161	862	0		0		intergenic	0	3395	0	-0.46999	1.49345	0.891852	0.161508	0.426872	0.40484	0.391414	-0.67383	-0.660898	-0.97683	-0.882514	-0.92642	-0.716132	-0.640476	-0.0918188	2.90086	-0.631893
903	chr1-151972432-151973518	109	chr1-151972432-151973518	1087	0		0		intergenic	0	19059	0	-0.46999	1.49345	0.891852	0.161508	0.426872	0.40484	0.391414	-0.67383	-0.660898	-0.97683	-0.882514	-0.92642	-0.716132	-0.640476	-0.0918188	2.90086	-0.631893
904	chr1-151988204-151988846	109	chr1-151988204-151988846	643	0	ENSG00000197747	1	S100A10	intron	0	3731	0	-0.46999	1.49345	0.891852	0.161508	0.426872	0.40484	0.391414	-0.67383	-0.660898	-0.97683	-0.882514	-0.92642	-0.716132	-0.640476	-0.0918188	2.90086	-0.631893
905	chr1-152044344-152044687	111	chr1-152044344-152044687	344	0	ENSG00000163191	1	S100A11	intron	0	3219	0	-0.579247	-0.481956	-0.64347	-0.46315	-0.610855	-0.391354	0.0140239	-0.729344	-0.670854	-0.176421	-0.455292	-0.120267	-0.319386	3.21174	0.505843	1.83394	0.0760506
906	chr1-152047544-152048751	111	chr1-152047544-152048751	1208	1	ENSG00000163191	1	S100A11	exon	1	0	0	-0.579247	-0.481956	-0.64347	-0.46315	-0.610855	-0.391354	0.0140239	-0.729344	-0.670854	-0.176421	-0.455292	-0.120267	-0.319386	3.21174	0.505843	1.83394	0.0760506
907	chr1-152160578-152160935	111	chr1-152160578-152160935	358	0	ENSG00000215853	0	RPTN	promoter	1	1349	0	-0.579247	-0.481956	-0.64347	-0.46315	-0.610855	-0.391354	0.0140239	-0.729344	-0.670854	-0.176421	-0.455292	-0.120267	-0.319386	3.21174	0.505843	1.83394	0.0760506
908	chr1-152979480-152980538	118	chr1-152979480-152980538	1059	0		0		intergenic	0	4692	0	0.114384	0.234478	0.187003	1.25193	0.922419	1.41797	0.129373	-0.748335	-1.06095	-0.444896	-0.932363	-1.12964	-1.42484	1.93254	1.15485	-0.939039	-0.664892
909	chr1-152984763-152985378	118	chr1-152984763-152985378	616	1	ENSG00000169474	1	SPRR1A	exon	1	0	0	0.114384	0.234478	0.187003	1.25193	0.922419	1.41797	0.129373	-0.748335	-1.06095	-0.444896	-0.932363	-1.12964	-1.42484	1.93254	1.15485	-0.939039	-0.664892
910	chr1-153008332-153009022	118	chr1-153008332-153009022	691	0		0		intergenic	0	6560	0	0.114384	0.234478	0.187003	1.25193	0.922419	1.41797	0.129373	-0.748335	-1.06095	-0.444896	-0.932363	-1.12964	-1.42484	1.93254	1.15485	-0.939039	-0.664892
911	chr1-153021650-153022580	118	chr1-153021650-153022580	931	0		0		intergenic	0	8621	0	0.114384	0.234478	0.187003	1.25193	0.922419	1.41797	0.129373	-0.748335	-1.06095	-0.444896	-0.932363	-1.12964	-1.42484	1.93254	1.15485	-0.939039	-0.664892
912	chr1-153032672-153033242	118	chr1-153032672-153033242	571	1	ENSG00000169469	1	SPRR1B	exon	0	1469	0	0.114384	0.234478	0.187003	1.25193	0.922419	1.41797	0.129373	-0.748335	-1.06095	-0.444896	-0.932363	-1.12964	-1.42484	1.93254	1.15485	-0.939039	-0.664892
913	chr1-153115076-153115641	118	chr1-153115076-153115641	566	0	ENSG00000244094	0	SPRR2F	promoter	1	1560	0	0.114384	0.234478	0.187003	1.25193	0.922419	1.41797	0.129373	-0.748335	-1.06095	-0.444896	-0.932363	-1.12964	-1.42484	1.93254	1.15485	-0.939039	-0.664892
914	chr1-153118282-153118652	118	chr1-153118282-153118652	371	0		0		intergenic	0	4766	0	0.114384	0.234478	0.187003	1.25193	0.922419	1.41797	0.129373	-0.748335	-1.06095	-0.444896	-0.932363	-1.12964	-1.42484	1.93254	1.15485	-0.939039	-0.664892
915	chr1-153119092-153120059	118	chr1-153119092-153120059	968	0		0		intergenic	0	5576	0	0.114384	0.234478	0.187003	1.25193	0.922419	1.41797	0.129373	-0.748335	-1.06095	-0.444896	-0.932363	-1.12964	-1.42484	1.93254	1.15485	-0.939039	-0.664892
916	chr1-153122657-153123300	118	chr1-153122657-153123300	644	0		0		intergenic	0	9141	0	0.114384	0.234478	0.187003	1.25193	0.922419	1.41797	0.129373	-0.748335	-1.06095	-0.444896	-0.932363	-1.12964	-1.42484	1.93254	1.15485	-0.939039	-0.664892
917	chr1-153192682-153193009	118	chr1-153192682-153193009	328	0		0		intergenic	0	10433	0	0.114384	0.234478	0.187003	1.25193	0.922419	1.41797	0.129373	-0.748335	-1.06095	-0.444896	-0.932363	-1.12964	-1.42484	1.93254	1.15485	-0.939039	-0.664892
918	chr1-153217784-153218339	118	chr1-153217784-153218339	556	1	ENSG00000203783	1	PRR9	exon	0	199	0	0.114384	0.234478	0.187003	1.25193	0.922419	1.41797	0.129373	-0.748335	-1.06095	-0.444896	-0.932363	-1.12964	-1.42484	1.93254	1.15485	-0.939039	-0.664892
919	chr1-153220174-153221485	118	chr1-153220174-153221485	1312	0		0		intergenic	0	2589	0	0.114384	0.234478	0.187003	1.25193	0.922419	1.41797	0.129373	-0.748335	-1.06095	-0.444896	-0.932363	-1.12964	-1.42484	1.93254	1.15485	-0.939039	-0.664892
920	chr1-153245465-153246294	118	chr1-153245465-153246294	830	0		0		intergenic	0	13405	0	0.114384	0.234478	0.187003	1.25193	0.922419	1.41797	0.129373	-0.748335	-1.06095	-0.444896	-0.932363	-1.12964	-1.42484	1.93254	1.15485	-0.939039	-0.664892
921	chr1-153369437-153370562	118	chr1-153369437-153370562	1126	0		0		intergenic	0	5086	0	0.114384	0.234478	0.187003	1.25193	0.922419	1.41797	0.129373	-0.748335	-1.06095	-0.444896	-0.932363	-1.12964	-1.42484	1.93254	1.15485	-0.939039	-0.664892
922	chr1-153421977-153422850	118	chr1-153421977-153422850	874	1	ENSG00000184330	1	S100A7A	exon	0	4032	0	0.114384	0.234478	0.187003	1.25193	0.922419	1.41797	0.129373	-0.748335	-1.06095	-0.444896	-0.932363	-1.12964	-1.42484	1.93254	1.15485	-0.939039	-0.664892
923	chr1-153452243-153452784	118	chr1-153452243-153452784	542	0		0		intergenic	0	7089	0	0.114384	0.234478	0.187003	1.25193	0.922419	1.41797	0.129373	-0.748335	-1.06095	-0.444896	-0.932363	-1.12964	-1.42484	1.93254	1.15485	-0.939039	-0.664892
924	chr1-153490101-153491033	118	chr1-153490101-153491033	933	0		0		intergenic	0	29399	0	0.114384	0.234478	0.187003	1.25193	0.922419	1.41797	0.129373	-0.748335	-1.06095	-0.444896	-0.932363	-1.12964	-1.42484	1.93254	1.15485	-0.939039	-0.664892
925	chr1-153532675-153533579	118	chr1-153532675-153533579	905	0		0		intergenic	0	2411	0	0.114384	0.234478	0.187003	1.25193	0.922419	1.41797	0.129373	-0.748335	-1.06095	-0.444896	-0.932363	-1.12964	-1.42484	1.93254	1.15485	-0.939039	-0.664892
926	chr1-153535357-153536606	118	chr1-153535357-153536606	1250	1	ENSG00000197956	1	S100A6	exon	1	0	0	0.114384	0.234478	0.187003	1.25193	0.922419	1.41797	0.129373	-0.748335	-1.06095	-0.444896	-0.932363	-1.12964	-1.42484	1.93254	1.15485	-0.939039	-0.664892
927	chr1-153544694-153546025	118	chr1-153544694-153546025	1332	1	ENSG00000196154	1	S100A4	exon	1	0	0	0.114384	0.234478	0.187003	1.25193	0.922419	1.41797	0.129373	-0.748335	-1.06095	-0.444896	-0.932363	-1.12964	-1.42484	1.93254	1.15485	-0.939039	-0.664892
928	chr1-153548913-153549574	118	chr1-153548913-153549574	662	1	ENSG00000188015	1	S100A3	exon	1	0	0	0.114384	0.234478	0.187003	1.25193	0.922419	1.41797	0.129373	-0.748335	-1.06095	-0.444896	-0.932363	-1.12964	-1.42484	1.93254	1.15485	-0.939039	-0.664892
929	chr1-153553641-153554556	118	chr1-153553641-153554556	916	0		0		intergenic	0	3504	0	0.114384	0.234478	0.187003	1.25193	0.922419	1.41797	0.129373	-0.748335	-1.06095	-0.444896	-0.932363	-1.12964	-1.42484	1.93254	1.15485	-0.939039	-0.664892
930	chr1-153563420-153563652	118	chr1-153563420-153563652	233	1	ENSG00000196754	1	S100A2	exon	0	580	0	0.114384	0.234478	0.187003	1.25193	0.922419	1.41797	0.129373	-0.748335	-1.06095	-0.444896	-0.932363	-1.12964	-1.42484	1.93254	1.15485	-0.939039	-0.664892
931	chr1-153565549-153566946	118	chr1-153565549-153566946	1398	1	ENSG00000196754	1	S100A2	exon	1	0	0	0.114384	0.234478	0.187003	1.25193	0.922419	1.41797	0.129373	-0.748335	-1.06095	-0.444896	-0.932363	-1.12964	-1.42484	1.93254	1.15485	-0.939039	-0.664892
932	chr1-153572335-153572872	118	chr1-153572335-153572872	538	0		0		intergenic	0	4444	0	0.114384	0.234478	0.187003	1.25193	0.922419	1.41797	0.129373	-0.748335	-1.06095	-0.444896	-0.932363	-1.12964	-1.42484	1.93254	1.15485	-0.939039	-0.664892
933	chr1-153584746-153585284	118	chr1-153584746-153585284	539	0		0		intergenic	0	16855	0	0.114384	0.234478	0.187003	1.25193	0.922419	1.41797	0.129373	-0.748335	-1.06095	-0.444896	-0.932363	-1.12964	-1.42484	1.93254	1.15485	-0.939039	-0.664892
934	chr1-153588114-153588897	118	chr1-153588114-153588897	784	0		0		intergenic	0	19424	0	0.114384	0.234478	0.187003	1.25193	0.922419	1.41797	0.129373	-0.748335	-1.06095	-0.444896	-0.932363	-1.12964	-1.42484	1.93254	1.15485	-0.939039	-0.664892
935	chr1-153598589-153599230	118	chr1-153598589-153599230	642	0		0		intergenic	0	9091	0	0.114384	0.234478	0.187003	1.25193	0.922419	1.41797	0.129373	-0.748335	-1.06095	-0.444896	-0.932363	-1.12964	-1.42484	1.93254	1.15485	-0.939039	-0.664892
936	chr1-153616140-153616600	118	chr1-153616140-153616600	461	1	ENSG00000189334	1	S100A14	exon	1	0	0	0.114384	0.234478	0.187003	1.25193	0.922419	1.41797	0.129373	-0.748335	-1.06095	-0.444896	-0.932363	-1.12964	-1.42484	1.93254	1.15485	-0.939039	-0.664892
937	chr1-153684679-153685904	118	chr1-153684679-153685904	1226	1	ENSG00000169418	1	NPR1	exon	0	2819	0	0.114384	0.234478	0.187003	1.25193	0.922419	1.41797	0.129373	-0.748335	-1.06095	-0.444896	-0.932363	-1.12964	-1.42484	1.93254	1.15485	-0.939039	-0.664892
938	chr1-153725746-153726602	118	chr1-153725746-153726602	857	0	ENSG00000143624	0	INTS3	promoter	1	1464	0	0.114384	0.234478	0.187003	1.25193	0.922419	1.41797	0.129373	-0.748335	-1.06095	-0.444896	-0.932363	-1.12964	-1.42484	1.93254	1.15485	-0.939039	-0.664892
939	chr1-153730945-153731271	118	chr1-153730945-153731271	327	0	ENSG00000143624	1	INTS3	intron	0	2461	0	0.114384	0.234478	0.187003	1.25193	0.922419	1.41797	0.129373	-0.748335	-1.06095	-0.444896	-0.932363	-1.12964	-1.42484	1.93254	1.15485	-0.939039	-0.664892
940	chr1-153741868-153743226	118	chr1-153741868-153743226	1359	0	ENSG00000143624	1	INTS3	intron	0	7627	0	0.114384	0.234478	0.187003	1.25193	0.922419	1.41797	0.129373	-0.748335	-1.06095	-0.444896	-0.932363	-1.12964	-1.42484	1.93254	1.15485	-0.939039	-0.664892
941	chr1-153763313-153764333	118	chr1-153763313-153764333	1021	1	ENSG00000143624	1	INTS3	exon	0	2141	0	0.114384	0.234478	0.187003	1.25193	0.922419	1.41797	0.129373	-0.748335	-1.06095	-0.444896	-0.932363	-1.12964	-1.42484	1.93254	1.15485	-0.939039	-0.664892
942	chr1-153770743-153771429	118	chr1-153770743-153771429	687	0	ENSG00000143624	1	INTS3	promoter	1	1604	0	0.114384	0.234478	0.187003	1.25193	0.922419	1.41797	0.129373	-0.748335	-1.06095	-0.444896	-0.932363	-1.12964	-1.42484	1.93254	1.15485	-0.939039	-0.664892
943	chr1-153771897-153772181	118	chr1-153771897-153772181	285	1	ENSG00000143624	1	INTS3	exon	1	852	0	0.114384	0.234478	0.187003	1.25193	0.922419	1.41797	0.129373	-0.748335	-1.06095	-0.444896	-0.932363	-1.12964	-1.42484	1.93254	1.15485	-0.939039	-0.664892
944	chr1-153773162-153773797	118	chr1-153773162-153773797	636	1	ENSG00000279767	1	AL513523.2	exon	1	127	0	0.114384	0.234478	0.187003	1.25193	0.922419	1.41797	0.129373	-0.748335	-1.06095	-0.444896	-0.932363	-1.12964	-1.42484	1.93254	1.15485	-0.939039	-0.664892
945	chr1-153779854-153780717	118	chr1-153779854-153780717	864	1	ENSG00000143554	1	SLC27A3	exon	0	652	0	0.114384	0.234478	0.187003	1.25193	0.922419	1.41797	0.129373	-0.748335	-1.06095	-0.444896	-0.932363	-1.12964	-1.42484	1.93254	1.15485	-0.939039	-0.664892
946	chr1-153781064-153781358	118	chr1-153781064-153781358	295	0		0		intergenic	0	1862	0	0.114384	0.234478	0.187003	1.25193	0.922419	1.41797	0.129373	-0.748335	-1.06095	-0.444896	-0.932363	-1.12964	-1.42484	1.93254	1.15485	-0.939039	-0.664892
947	chr1-153785072-153785615	118	chr1-153785072-153785615	544	0		0		intergenic	0	5870	0	0.114384	0.234478	0.187003	1.25193	0.922419	1.41797	0.129373	-0.748335	-1.06095	-0.444896	-0.932363	-1.12964	-1.42484	1.93254	1.15485	-0.939039	-0.664892
948	chr1-153797007-153798024	118	chr1-153797007-153798024	1018	0	ENSG00000143614	1	GATAD2B	intron	0	14013	0	0.114384	0.234478	0.187003	1.25193	0.922419	1.41797	0.129373	-0.748335	-1.06095	-0.444896	-0.932363	-1.12964	-1.42484	1.93254	1.15485	-0.939039	-0.664892
949	chr1-153955614-153956239	118	chr1-153955614-153956239	626	0	ENSG00000160741	1	CRTC2	promoter	1	624	0	0.114384	0.234478	0.187003	1.25193	0.922419	1.41797	0.129373	-0.748335	-1.06095	-0.444896	-0.932363	-1.12964	-1.42484	1.93254	1.15485	-0.939039	-0.664892
950	chr1-154001332-154002129	118	chr1-154001332-154002129	798	1	ENSG00000143552	1	NUP210L	exon	0	10568	0	0.114384	0.234478	0.187003	1.25193	0.922419	1.41797	0.129373	-0.748335	-1.06095	-0.444896	-0.932363	-1.12964	-1.42484	1.93254	1.15485	-0.939039	-0.664892
951	chr1-154154426-154155682	118	chr1-154154426-154155682	1257	1	ENSG00000143549	1	TPM3	exon	1	0	0	0.114384	0.234478	0.187003	1.25193	0.922419	1.41797	0.129373	-0.748335	-1.06095	-0.444896	-0.932363	-1.12964	-1.42484	1.93254	1.15485	-0.939039	-0.664892
952	chr1-154157351-154158135	118	chr1-154157351-154158135	785	1	ENSG00000143549	1	TPM3	exon	0	2234	0	0.114384	0.234478	0.187003	1.25193	0.922419	1.41797	0.129373	-0.748335	-1.06095	-0.444896	-0.932363	-1.12964	-1.42484	1.93254	1.15485	-0.939039	-0.664892
953	chr1-154176144-154176815	118	chr1-154176144-154176815	672	1	ENSG00000143549	1	TPM3	exon	1	0	0	0.114384	0.234478	0.187003	1.25193	0.922419	1.41797	0.129373	-0.748335	-1.06095	-0.444896	-0.932363	-1.12964	-1.42484	1.93254	1.15485	-0.939039	-0.664892
954	chr1-154178846-154179430	118	chr1-154178846-154179430	585	0	ENSG00000143549	1	TPM3	promoter	1	662	0	0.114384	0.234478	0.187003	1.25193	0.922419	1.41797	0.129373	-0.748335	-1.06095	-0.444896	-0.932363	-1.12964	-1.42484	1.93254	1.15485	-0.939039	-0.664892
955	chr1-154186834-154187069	118	chr1-154186834-154187069	236	0	ENSG00000143549	1	TPM3	intron	0	3017	0	0.114384	0.234478	0.187003	1.25193	0.922419	1.41797	0.129373	-0.748335	-1.06095	-0.444896	-0.932363	-1.12964	-1.42484	1.93254	1.15485	-0.939039	-0.664892
956	chr1-154290805-154292054	118	chr1-154290805-154292054	1250	0		0		intergenic	0	16906	0	0.114384	0.234478	0.187003	1.25193	0.922419	1.41797	0.129373	-0.748335	-1.06095	-0.444896	-0.932363	-1.12964	-1.42484	1.93254	1.15485	-0.939039	-0.664892
957	chr1-154320789-154321207	118	chr1-154320789-154321207	419	1	ENSG00000143595	1	AQP10	exon	1	0	0	0.114384	0.234478	0.187003	1.25193	0.922419	1.41797	0.129373	-0.748335	-1.06095	-0.444896	-0.932363	-1.12964	-1.42484	1.93254	1.15485	-0.939039	-0.664892
958	chr1-154327561-154327806	118	chr1-154327561-154327806	246	0	ENSG00000143515	1	ATP8B2	promoter	1	0	0	0.114384	0.234478	0.187003	1.25193	0.922419	1.41797	0.129373	-0.748335	-1.06095	-0.444896	-0.932363	-1.12964	-1.42484	1.93254	1.15485	-0.939039	-0.664892
959	chr1-154328234-154329420	118	chr1-154328234-154329420	1187	1	ENSG00000143515	1	ATP8B2	exon	1	0	0	0.114384	0.234478	0.187003	1.25193	0.922419	1.41797	0.129373	-0.748335	-1.06095	-0.444896	-0.932363	-1.12964	-1.42484	1.93254	1.15485	-0.939039	-0.664892
960	chr1-154350372-154350696	118	chr1-154350372-154350696	325	1	ENSG00000143515	1	ATP8B2	exon	0	3756	0	0.114384	0.234478	0.187003	1.25193	0.922419	1.41797	0.129373	-0.748335	-1.06095	-0.444896	-0.932363	-1.12964	-1.42484	1.93254	1.15485	-0.939039	-0.664892
961	chr1-154384953-154385954	118	chr1-154384953-154385954	1002	0		0		intergenic	0	19238	0	0.114384	0.234478	0.187003	1.25193	0.922419	1.41797	0.129373	-0.748335	-1.06095	-0.444896	-0.932363	-1.12964	-1.42484	1.93254	1.15485	-0.939039	-0.664892
962	chr1-154407163-154407854	118	chr1-154407163-154407854	692	0	ENSG00000160712	1	IL6R	intron	0	1547	0	0.114384	0.234478	0.187003	1.25193	0.922419	1.41797	0.129373	-0.748335	-1.06095	-0.444896	-0.932363	-1.12964	-1.42484	1.93254	1.15485	-0.939039	-0.664892
963	chr1-154408252-154408803	118	chr1-154408252-154408803	552	0	ENSG00000160712	1	IL6R	intron	0	2636	0	0.114384	0.234478	0.187003	1.25193	0.922419	1.41797	0.129373	-0.748335	-1.06095	-0.444896	-0.932363	-1.12964	-1.42484	1.93254	1.15485	-0.939039	-0.664892
964	chr1-154418103-154418996	118	chr1-154418103-154418996	894	0	ENSG00000160712	1	IL6R	intron	0	10346	0	0.114384	0.234478	0.187003	1.25193	0.922419	1.41797	0.129373	-0.748335	-1.06095	-0.444896	-0.932363	-1.12964	-1.42484	1.93254	1.15485	-0.939039	-0.664892
965	chr1-154419314-154419899	118	chr1-154419314-154419899	586	0	ENSG00000160712	1	IL6R	intron	0	9443	0	0.114384	0.234478	0.187003	1.25193	0.922419	1.41797	0.129373	-0.748335	-1.06095	-0.444896	-0.932363	-1.12964	-1.42484	1.93254	1.15485	-0.939039	-0.664892
966	chr1-154419981-154420529	118	chr1-154419981-154420529	549	0	ENSG00000160712	1	IL6R	intron	0	8813	0	0.114384	0.234478	0.187003	1.25193	0.922419	1.41797	0.129373	-0.748335	-1.06095	-0.444896	-0.932363	-1.12964	-1.42484	1.93254	1.15485	-0.939039	-0.664892
967	chr1-154423426-154424109	118	chr1-154423426-154424109	684	0	ENSG00000160712	1	IL6R	intron	0	5233	0	0.114384	0.234478	0.187003	1.25193	0.922419	1.41797	0.129373	-0.748335	-1.06095	-0.444896	-0.932363	-1.12964	-1.42484	1.93254	1.15485	-0.939039	-0.664892
968	chr1-154427100-154428142	118	chr1-154427100-154428142	1043	0	ENSG00000160712	1	IL6R	promoter	1	1200	0	0.114384	0.234478	0.187003	1.25193	0.922419	1.41797	0.129373	-0.748335	-1.06095	-0.444896	-0.932363	-1.12964	-1.42484	1.93254	1.15485	-0.939039	-0.664892
969	chr1-154430328-154431327	118	chr1-154430328-154431327	1000	1	ENSG00000160712	1	IL6R	exon	0	984	0	0.114384	0.234478	0.187003	1.25193	0.922419	1.41797	0.129373	-0.748335	-1.06095	-0.444896	-0.932363	-1.12964	-1.42484	1.93254	1.15485	-0.939039	-0.664892
970	chr1-154432617-154432941	118	chr1-154432617-154432941	325	0	ENSG00000160712	1	IL6R	promoter	1	1711	0	0.114384	0.234478	0.187003	1.25193	0.922419	1.41797	0.129373	-0.748335	-1.06095	-0.444896	-0.932363	-1.12964	-1.42484	1.93254	1.15485	-0.939039	-0.664892
971	chr1-154434198-154435156	118	chr1-154434198-154435156	959	1	ENSG00000160712	1	IL6R	exon	1	0	0	0.114384	0.234478	0.187003	1.25193	0.922419	1.41797	0.129373	-0.748335	-1.06095	-0.444896	-0.932363	-1.12964	-1.42484	1.93254	1.15485	-0.939039	-0.664892
972	chr1-154441360-154442635	118	chr1-154441360-154442635	1276	0	ENSG00000160712	1	IL6R	intron	0	6349	0	0.114384	0.234478	0.187003	1.25193	0.922419	1.41797	0.129373	-0.748335	-1.06095	-0.444896	-0.932363	-1.12964	-1.42484	1.93254	1.15485	-0.939039	-0.664892
973	chr1-154468413-154469282	118	chr1-154468413-154469282	870	1	ENSG00000160712	1	IL6R	exon	0	14303	0	0.114384	0.234478	0.187003	1.25193	0.922419	1.41797	0.129373	-0.748335	-1.06095	-0.444896	-0.932363	-1.12964	-1.42484	1.93254	1.15485	-0.939039	-0.664892
974	chr1-154477876-154479052	118	chr1-154477876-154479052	1177	0	ENSG00000169291	1	SHE	intron	0	6991	0	0.114384	0.234478	0.187003	1.25193	0.922419	1.41797	0.129373	-0.748335	-1.06095	-0.444896	-0.932363	-1.12964	-1.42484	1.93254	1.15485	-0.939039	-0.664892
975	chr1-154484125-154484659	118	chr1-154484125-154484659	535	1	ENSG00000169291	1	SHE	exon	0	1384	0	0.114384	0.234478	0.187003	1.25193	0.922419	1.41797	0.129373	-0.748335	-1.06095	-0.444896	-0.932363	-1.12964	-1.42484	1.93254	1.15485	-0.939039	-0.664892
976	chr1-154484941-154485604	118	chr1-154484941-154485604	664	1	ENSG00000169291	1	SHE	exon	0	439	0	0.114384	0.234478	0.187003	1.25193	0.922419	1.41797	0.129373	-0.748335	-1.06095	-0.444896	-0.932363	-1.12964	-1.42484	1.93254	1.15485	-0.939039	-0.664892
977	chr1-154490281-154490571	118	chr1-154490281-154490571	291	0	ENSG00000169291	1	SHE	promoter	1	1114	0	0.114384	0.234478	0.187003	1.25193	0.922419	1.41797	0.129373	-0.748335	-1.06095	-0.444896	-0.932363	-1.12964	-1.42484	1.93254	1.15485	-0.939039	-0.664892
978	chr1-154492245-154493619	118	chr1-154492245-154493619	1375	0	ENSG00000169291	1	SHE	intron	0	3078	0	0.114384	0.234478	0.187003	1.25193	0.922419	1.41797	0.129373	-0.748335	-1.06095	-0.444896	-0.932363	-1.12964	-1.42484	1.93254	1.15485	-0.939039	-0.664892
979	chr1-154496981-154497332	118	chr1-154496981-154497332	352	0	ENSG00000169291	1	SHE	intron	0	4780	0	0.114384	0.234478	0.187003	1.25193	0.922419	1.41797	0.129373	-0.748335	-1.06095	-0.444896	-0.932363	-1.12964	-1.42484	1.93254	1.15485	-0.939039	-0.664892
980	chr1-154519477-154520071	118	chr1-154519477-154520071	595	0	ENSG00000163239	1	TDRD10	promoter	1	1294	0	0.114384	0.234478	0.187003	1.25193	0.922419	1.41797	0.129373	-0.748335	-1.06095	-0.444896	-0.932363	-1.12964	-1.42484	1.93254	1.15485	-0.939039	-0.664892
981	chr1-154546432-154547587	118	chr1-154546432-154547587	1156	1	ENSG00000163239	1	TDRD10	exon	0	4213	0	0.114384	0.234478	0.187003	1.25193	0.922419	1.41797	0.129373	-0.748335	-1.06095	-0.444896	-0.932363	-1.12964	-1.42484	1.93254	1.15485	-0.939039	-0.664892
982	chr1-154547915-154548968	118	chr1-154547915-154548968	1054	1	ENSG00000160714	1	UBE2Q1	exon	0	2832	0	0.114384	0.234478	0.187003	1.25193	0.922419	1.41797	0.129373	-0.748335	-1.06095	-0.444896	-0.932363	-1.12964	-1.42484	1.93254	1.15485	-0.939039	-0.664892
983	chr1-154556400-154556777	118	chr1-154556400-154556777	378	0	ENSG00000160714	1	UBE2Q1	intron	0	1855	0	0.114384	0.234478	0.187003	1.25193	0.922419	1.41797	0.129373	-0.748335	-1.06095	-0.444896	-0.932363	-1.12964	-1.42484	1.93254	1.15485	-0.939039	-0.664892
984	chr1-154567183-154568457	118	chr1-154567183-154568457	1275	1	ENSG00000160716	1	CHRNB2	exon	1	0	0	0.114384	0.234478	0.187003	1.25193	0.922419	1.41797	0.129373	-0.748335	-1.06095	-0.444896	-0.932363	-1.12964	-1.42484	1.93254	1.15485	-0.939039	-0.664892
985	chr1-154577593-154578463	118	chr1-154577593-154578463	871	1	ENSG00000160716	1	CHRNB2	exon	0	783	0	0.114384	0.234478	0.187003	1.25193	0.922419	1.41797	0.129373	-0.748335	-1.06095	-0.444896	-0.932363	-1.12964	-1.42484	1.93254	1.15485	-0.939039	-0.664892
986	chr1-154603520-154603832	118	chr1-154603520-154603832	313	0	ENSG00000160710	1	ADAR	promoter	1	893	0	0.114384	0.234478	0.187003	1.25193	0.922419	1.41797	0.129373	-0.748335	-1.06095	-0.444896	-0.932363	-1.12964	-1.42484	1.93254	1.15485	-0.939039	-0.664892
987	chr1-154611195-154611863	118	chr1-154611195-154611863	669	0	ENSG00000160710	1	ADAR	intron	0	2382	0	0.114384	0.234478	0.187003	1.25193	0.922419	1.41797	0.129373	-0.748335	-1.06095	-0.444896	-0.932363	-1.12964	-1.42484	1.93254	1.15485	-0.939039	-0.664892
988	chr1-154623363-154623676	118	chr1-154623363-154623676	314	0	ENSG00000160710	1	ADAR	intron	0	4235	0	0.114384	0.234478	0.187003	1.25193	0.922419	1.41797	0.129373	-0.748335	-1.06095	-0.444896	-0.932363	-1.12964	-1.42484	1.93254	1.15485	-0.939039	-0.664892
989	chr1-154712087-154712989	118	chr1-154712087-154712989	903	0	ENSG00000143603	1	KCNN3	intron	0	3860	0	0.114384	0.234478	0.187003	1.25193	0.922419	1.41797	0.129373	-0.748335	-1.06095	-0.444896	-0.932363	-1.12964	-1.42484	1.93254	1.15485	-0.939039	-0.664892
990	chr1-154720709-154721267	118	chr1-154720709-154721267	559	0	ENSG00000143603	1	KCNN3	intron	0	12482	0	0.114384	0.234478	0.187003	1.25193	0.922419	1.41797	0.129373	-0.748335	-1.06095	-0.444896	-0.932363	-1.12964	-1.42484	1.93254	1.15485	-0.939039	-0.664892
991	chr1-154726852-154727684	118	chr1-154726852-154727684	833	0	ENSG00000143603	1	KCNN3	intron	0	18625	0	0.114384	0.234478	0.187003	1.25193	0.922419	1.41797	0.129373	-0.748335	-1.06095	-0.444896	-0.932363	-1.12964	-1.42484	1.93254	1.15485	-0.939039	-0.664892
992	chr1-154727756-154728145	118	chr1-154727756-154728145	390	0	ENSG00000143603	1	KCNN3	intron	0	19529	0	0.114384	0.234478	0.187003	1.25193	0.922419	1.41797	0.129373	-0.748335	-1.06095	-0.444896	-0.932363	-1.12964	-1.42484	1.93254	1.15485	-0.939039	-0.664892
993	chr1-154729041-154729941	118	chr1-154729041-154729941	901	0	ENSG00000143603	1	KCNN3	intron	0	20814	0	0.114384	0.234478	0.187003	1.25193	0.922419	1.41797	0.129373	-0.748335	-1.06095	-0.444896	-0.932363	-1.12964	-1.42484	1.93254	1.15485	-0.939039	-0.664892
994	chr1-154741914-154742942	118	chr1-154741914-154742942	1029	0	ENSG00000143603	1	KCNN3	intron	0	33687	0	0.114384	0.234478	0.187003	1.25193	0.922419	1.41797	0.129373	-0.748335	-1.06095	-0.444896	-0.932363	-1.12964	-1.42484	1.93254	1.15485	-0.939039	-0.664892
995	chr1-154745191-154745699	118	chr1-154745191-154745699	509	0	ENSG00000143603	1	KCNN3	intron	0	36964	0	0.114384	0.234478	0.187003	1.25193	0.922419	1.41797	0.129373	-0.748335	-1.06095	-0.444896	-0.932363	-1.12964	-1.42484	1.93254	1.15485	-0.939039	-0.664892
996	chr1-154747071-154748423	118	chr1-154747071-154748423	1353	0	ENSG00000143603	1	KCNN3	intron	0	38844	0	0.114384	0.234478	0.187003	1.25193	0.922419	1.41797	0.129373	-0.748335	-1.06095	-0.444896	-0.932363	-1.12964	-1.42484	1.93254	1.15485	-0.939039	-0.664892
997	chr1-154760229-154761025	118	chr1-154760229-154761025	797	0	ENSG00000143603	1	KCNN3	intron	0	52002	0	0.114384	0.234478	0.187003	1.25193	0.922419	1.41797	0.129373	-0.748335	-1.06095	-0.444896	-0.932363	-1.12964	-1.42484	1.93254	1.15485	-0.939039	-0.664892
998	chr1-154773168-154774136	118	chr1-154773168-154774136	969	0	ENSG00000143603	1	KCNN3	intron	0	64941	0	0.114384	0.234478	0.187003	1.25193	0.922419	1.41797	0.129373	-0.748335	-1.06095	-0.444896	-0.932363	-1.12964	-1.42484	1.93254	1.15485	-0.939039	-0.664892
999	chr1-154786870-154787319	118	chr1-154786870-154787319	450	0	ENSG00000143603	1	KCNN3	intron	0	72523	0	0.114384	0.234478	0.187003	1.25193	0.922419	1.41797	0.129373	-0.748335	-1.06095	-0.444896	-0.932363	-1.12964	-1.42484	1.93254	1.15485	-0.939039	-0.664892
1000	chr1-154807086-154807944	118	chr1-154807086-154807944	859	0	ENSG00000143603	1	KCNN3	intron	0	51898	0	0.114384	0.234478	0.187003	1.25193	0.922419	1.41797	0.129373	-0.748335	-1.06095	-0.444896	-0.932363	-1.12964	-1.42484	1.93254	1.15485	-0.939039	-0.664892
1001	chr1-154820640-154821461	118	chr1-154820640-154821461	822	0	ENSG00000143603	1	KCNN3	intron	0	38381	0	0.114384	0.234478	0.187003	1.25193	0.922419	1.41797	0.129373	-0.748335	-1.06095	-0.444896	-0.932363	-1.12964	-1.42484	1.93254	1.15485	-0.939039	-0.664892
1002	chr1-154824022-154825026	118	chr1-154824022-154825026	1005	0	ENSG00000143603	1	KCNN3	intron	0	34816	0	0.114384	0.234478	0.187003	1.25193	0.922419	1.41797	0.129373	-0.748335	-1.06095	-0.444896	-0.932363	-1.12964	-1.42484	1.93254	1.15485	-0.939039	-0.664892
1003	chr1-154826461-154827178	118	chr1-154826461-154827178	718	0	ENSG00000143603	1	KCNN3	intron	0	32664	0	0.114384	0.234478	0.187003	1.25193	0.922419	1.41797	0.129373	-0.748335	-1.06095	-0.444896	-0.932363	-1.12964	-1.42484	1.93254	1.15485	-0.939039	-0.664892
1004	chr1-154837075-154838369	118	chr1-154837075-154838369	1295	0	ENSG00000143603	1	KCNN3	intron	0	21473	0	0.114384	0.234478	0.187003	1.25193	0.922419	1.41797	0.129373	-0.748335	-1.06095	-0.444896	-0.932363	-1.12964	-1.42484	1.93254	1.15485	-0.939039	-0.664892
1005	chr1-154847649-154848733	118	chr1-154847649-154848733	1085	0	ENSG00000143603	1	KCNN3	intron	0	11109	0	0.114384	0.234478	0.187003	1.25193	0.922419	1.41797	0.129373	-0.748335	-1.06095	-0.444896	-0.932363	-1.12964	-1.42484	1.93254	1.15485	-0.939039	-0.664892
1006	chr1-154855890-154856739	118	chr1-154855890-154856739	850	0	ENSG00000143603	1	KCNN3	intron	0	3103	0	0.114384	0.234478	0.187003	1.25193	0.922419	1.41797	0.129373	-0.748335	-1.06095	-0.444896	-0.932363	-1.12964	-1.42484	1.93254	1.15485	-0.939039	-0.664892
1007	chr1-154867891-154868168	118	chr1-154867891-154868168	278	1	ENSG00000143603	1	KCNN3	exon	0	150	0	0.114384	0.234478	0.187003	1.25193	0.922419	1.41797	0.129373	-0.748335	-1.06095	-0.444896	-0.932363	-1.12964	-1.42484	1.93254	1.15485	-0.939039	-0.664892
1008	chr1-154951310-154951591	118	chr1-154951310-154951591	282	1	ENSG00000163346	1	PBXIP1	exon	0	2165	0	0.114384	0.234478	0.187003	1.25193	0.922419	1.41797	0.129373	-0.748335	-1.06095	-0.444896	-0.932363	-1.12964	-1.42484	1.93254	1.15485	-0.939039	-0.664892
1009	chr1-154952090-154953030	118	chr1-154952090-154953030	941	0	ENSG00000163346	1	PBXIP1	intron	0	726	0	0.114384	0.234478	0.187003	1.25193	0.922419	1.41797	0.129373	-0.748335	-1.06095	-0.444896	-0.932363	-1.12964	-1.42484	1.93254	1.15485	-0.939039	-0.664892
1010	chr1-154969949-154970193	118	chr1-154969949-154970193	245	1	ENSG00000160691	1	SHC1	exon	1	547	0	0.114384	0.234478	0.187003	1.25193	0.922419	1.41797	0.129373	-0.748335	-1.06095	-0.444896	-0.932363	-1.12964	-1.42484	1.93254	1.15485	-0.939039	-0.664892
1011	chr1-154970382-154971441	118	chr1-154970382-154971441	1060	1	ENSG00000160691	1	SHC1	exon	1	0	0	0.114384	0.234478	0.187003	1.25193	0.922419	1.41797	0.129373	-0.748335	-1.06095	-0.444896	-0.932363	-1.12964	-1.42484	1.93254	1.15485	-0.939039	-0.664892
1012	chr1-155008099-155008397	118	chr1-155008099-155008397	299	0	ENSG00000160685	1	ZBTB7B	intron	0	5253	0	0.114384	0.234478	0.187003	1.25193	0.922419	1.41797	0.129373	-0.748335	-1.06095	-0.444896	-0.932363	-1.12964	-1.42484	1.93254	1.15485	-0.939039	-0.664892
1013	chr1-155008434-155009024	118	chr1-155008434-155009024	591	0	ENSG00000160685	1	ZBTB7B	intron	0	5423	0	0.114384	0.234478	0.187003	1.25193	0.922419	1.41797	0.129373	-0.748335	-1.06095	-0.444896	-0.932363	-1.12964	-1.42484	1.93254	1.15485	-0.939039	-0.664892
1014	chr1-155016964-155017916	118	chr1-155016964-155017916	953	1	ENSG00000160685	1	ZBTB7B	exon	0	2515	0	0.114384	0.234478	0.187003	1.25193	0.922419	1.41797	0.129373	-0.748335	-1.06095	-0.444896	-0.932363	-1.12964	-1.42484	1.93254	1.15485	-0.939039	-0.664892
1015	chr1-155078455-155079300	118	chr1-155078455-155079300	846	1	ENSG00000143590	1	EFNA3	exon	1	0	0	0.114384	0.234478	0.187003	1.25193	0.922419	1.41797	0.129373	-0.748335	-1.06095	-0.444896	-0.932363	-1.12964	-1.42484	1.93254	1.15485	-0.939039	-0.664892
1016	chr1-155250340-155251074	118	chr1-155250340-155251074	735	1	ENSG00000160767	1	FAM189B	exon	0	733	0	0.114384	0.234478	0.187003	1.25193	0.922419	1.41797	0.129373	-0.748335	-1.06095	-0.444896	-0.932363	-1.12964	-1.42484	1.93254	1.15485	-0.939039	-0.664892
1017	chr1-155261368-155262739	118	chr1-155261368-155262739	1372	1	ENSG00000116521	1	SCAMP3	exon	1	0	0	0.114384	0.234478	0.187003	1.25193	0.922419	1.41797	0.129373	-0.748335	-1.06095	-0.444896	-0.932363	-1.12964	-1.42484	1.93254	1.15485	-0.939039	-0.664892
1018	chr1-155272525-155273894	118	chr1-155272525-155273894	1370	1	ENSG00000176444	1	CLK2	exon	1	0	0	0.114384	0.234478	0.187003	1.25193	0.922419	1.41797	0.129373	-0.748335	-1.06095	-0.444896	-0.932363	-1.12964	-1.42484	1.93254	1.15485	-0.939039	-0.664892
1019	chr1-155320500-155321575	118	chr1-155320500-155321575	1076	1	ENSG00000160753	1	RUSC1	exon	1	0	0	0.114384	0.234478	0.187003	1.25193	0.922419	1.41797	0.129373	-0.748335	-1.06095	-0.444896	-0.932363	-1.12964	-1.42484	1.93254	1.15485	-0.939039	-0.664892
1020	chr1-155609423-155610243	118	chr1-155609423-155610243	821	1	ENSG00000125459	1	MSTO1	exon	1	0	0	0.114384	0.234478	0.187003	1.25193	0.922419	1.41797	0.129373	-0.748335	-1.06095	-0.444896	-0.932363	-1.12964	-1.42484	1.93254	1.15485	-0.939039	-0.664892
1021	chr1-155744557-155745821	118	chr1-155744557-155745821	1265	0		0		intergenic	0	6380	0	0.114384	0.234478	0.187003	1.25193	0.922419	1.41797	0.129373	-0.748335	-1.06095	-0.444896	-0.932363	-1.12964	-1.42484	1.93254	1.15485	-0.939039	-0.664892
1022	chr1-15354063-15354843	117	chr1-15354063-15354843	781	0	ENSG00000142621	1	FHAD1	intron	0	2947	0	-0.702911	0.137276	0.757413	1.91862	1.72762	0.857738	1.80744	-0.579297	-0.78788	-0.743744	-0.936207	-0.777213	-0.585088	-0.566372	-1.01923	0.206337	-0.714502
1023	chr1-15355947-15356633	117	chr1-15355947-15356633	687	0	ENSG00000142621	1	FHAD1	promoter	1	1157	0	-0.702911	0.137276	0.757413	1.91862	1.72762	0.857738	1.80744	-0.579297	-0.78788	-0.743744	-0.936207	-0.777213	-0.585088	-0.566372	-1.01923	0.206337	-0.714502
1024	chr1-15418800-15419464	117	chr1-15418800-15419464	665	0	ENSG00000142634	1	EFHD2	intron	0	8534	0	-0.702911	0.137276	0.757413	1.91862	1.72762	0.857738	1.80744	-0.579297	-0.78788	-0.743744	-0.936207	-0.777213	-0.585088	-0.566372	-1.01923	0.206337	-0.714502
1025	chr1-15424062-15424705	117	chr1-15424062-15424705	644	0	ENSG00000142634	1	EFHD2	intron	0	13733	0	-0.702911	0.137276	0.757413	1.91862	1.72762	0.857738	1.80744	-0.579297	-0.78788	-0.743744	-0.936207	-0.777213	-0.585088	-0.566372	-1.01923	0.206337	-0.714502
1026	chr1-153658146-153659476	116	chr1-153658146-153659476	1331	1	ENSG00000143553	1	SNAPIN	exon	1	0	0	-0.180489	0.313685	-0.320823	-0.460845	-1.44042	-0.841758	-0.365566	0.310912	0.735141	1.19257	0.967622	0.266625	-0.111732	2.61098	-0.887099	-1.71704	-0.0717642
1027	chr1-153782989-153784068	116	chr1-153782989-153784068	1080	0		0		intergenic	0	3787	0	-0.180489	0.313685	-0.320823	-0.460845	-1.44042	-0.841758	-0.365566	0.310912	0.735141	1.19257	0.967622	0.266625	-0.111732	2.61098	-0.887099	-1.71704	-0.0717642
1028	chr1-153990239-153991108	116	chr1-153990239-153991108	870	1	ENSG00000177954	1	RPS27	exon	1	0	0	-0.180489	0.313685	-0.320823	-0.460845	-1.44042	-0.841758	-0.365566	0.310912	0.735141	1.19257	0.967622	0.266625	-0.111732	2.61098	-0.887099	-1.71704	-0.0717642
1029	chr1-154759079-154759671	119	chr1-154759079-154759671	593	0	ENSG00000143603	1	KCNN3	intron	0	50852	0	-0.0919948	-0.095669	-0.0330135	-0.12257	-0.106867	-0.163932	0.314925	-0.619649	-0.69118	0.00573818	-0.775936	-0.81971	-0.479659	0.600875	3.72281	-0.454661	-0.189507
1030	chr1-154784819-154785654	119	chr1-154784819-154785654	836	0	ENSG00000143603	1	KCNN3	intron	0	74188	0	-0.0919948	-0.095669	-0.0330135	-0.12257	-0.106867	-0.163932	0.314925	-0.619649	-0.69118	0.00573818	-0.775936	-0.81971	-0.479659	0.600875	3.72281	-0.454661	-0.189507
1031	chr1-154840344-154841154	119	chr1-154840344-154841154	811	0	ENSG00000143603	1	KCNN3	intron	0	18688	0	-0.0919948	-0.095669	-0.0330135	-0.12257	-0.106867	-0.163932	0.314925	-0.619649	-0.69118	0.00573818	-0.775936	-0.81971	-0.479659	0.600875	3.72281	-0.454661	-0.189507
1032	chr1-154862923-154863993	119	chr1-154862923-154863993	1071	0	ENSG00000143603	1	KCNN3	intron	0	3079	0	-0.0919948	-0.095669	-0.0330135	-0.12257	-0.106867	-0.163932	0.314925	-0.619649	-0.69118	0.00573818	-0.775936	-0.81971	-0.479659	0.600875	3.72281	-0.454661	-0.189507
1033	chr1-154972445-154972924	119	chr1-154972445-154972924	480	0	ENSG00000173207	1	CKS1B	promoter	1	1411	0	-0.0919948	-0.095669	-0.0330135	-0.12257	-0.106867	-0.163932	0.314925	-0.619649	-0.69118	0.00573818	-0.775936	-0.81971	-0.479659	0.600875	3.72281	-0.454661	-0.189507
1034	chr1-155044528-155045231	119	chr1-155044528-155045231	704	0	ENSG00000163357	1	DCST1	intron	0	5334	0	-0.0919948	-0.095669	-0.0330135	-0.12257	-0.106867	-0.163932	0.314925	-0.619649	-0.69118	0.00573818	-0.775936	-0.81971	-0.479659	0.600875	3.72281	-0.454661	-0.189507
1035	chr1-155052871-155053429	119	chr1-155052871-155053429	559	1	ENSG00000143537	1	ADAM15	exon	1	1516	0	-0.0919948	-0.095669	-0.0330135	-0.12257	-0.106867	-0.163932	0.314925	-0.619649	-0.69118	0.00573818	-0.775936	-0.81971	-0.479659	0.600875	3.72281	-0.454661	-0.189507
1036	chr1-155637303-155637759	126	chr1-155637303-155637759	457	0		0		intergenic	0	24081	0	-0.143299	-0.305857	-1.02073	-1.0041	-1.35611	-1.3857	-0.545811	-0.153818	0.309604	2.45642	0.851493	0.353449	0.136396	1.55818	0.806887	-0.789629	0.232621
1037	chr1-155648360-155648934	126	chr1-155648360-155648934	575	0		0		intergenic	0	22156	0	-0.143299	-0.305857	-1.02073	-1.0041	-1.35611	-1.3857	-0.545811	-0.153818	0.309604	2.45642	0.851493	0.353449	0.136396	1.55818	0.806887	-0.789629	0.232621
1038	chr1-155834326-155834862	126	chr1-155834326-155834862	537	0	ENSG00000116580	1	GON4L	intron	0	12805	0	-0.143299	-0.305857	-1.02073	-1.0041	-1.35611	-1.3857	-0.545811	-0.153818	0.309604	2.45642	0.851493	0.353449	0.136396	1.55818	0.806887	-0.789629	0.232621
1039	chr1-155892760-155894110	126	chr1-155892760-155894110	1351	0		0		intergenic	0	16680	0	-0.143299	-0.305857	-1.02073	-1.0041	-1.35611	-1.3857	-0.545811	-0.153818	0.309604	2.45642	0.851493	0.353449	0.136396	1.55818	0.806887	-0.789629	0.232621
1040	chr1-155909887-155910189	126	chr1-155909887-155910189	303	1	ENSG00000143622	1	RIT1	exon	0	601	0	-0.143299	-0.305857	-1.02073	-1.0041	-1.35611	-1.3857	-0.545811	-0.153818	0.309604	2.45642	0.851493	0.353449	0.136396	1.55818	0.806887	-0.789629	0.232621
1041	chr1-155945867-155946546	126	chr1-155945867-155946546	680	0		0		intergenic	0	4156	0	-0.143299	-0.305857	-1.02073	-1.0041	-1.35611	-1.3857	-0.545811	-0.153818	0.309604	2.45642	0.851493	0.353449	0.136396	1.55818	0.806887	-0.789629	0.232621
1042	chr1-155970512-155971140	126	chr1-155970512-155971140	629	1	ENSG00000116584	1	ARHGEF2	exon	1	0	0	-0.143299	-0.305857	-1.02073	-1.0041	-1.35611	-1.3857	-0.545811	-0.153818	0.309604	2.45642	0.851493	0.353449	0.136396	1.55818	0.806887	-0.789629	0.232621
1043	chr1-155979574-155980312	126	chr1-155979574-155980312	739	0	ENSG00000116584	1	ARHGEF2	promoter	1	460	0	-0.143299	-0.305857	-1.02073	-1.0041	-1.35611	-1.3857	-0.545811	-0.153818	0.309604	2.45642	0.851493	0.353449	0.136396	1.55818	0.806887	-0.789629	0.232621
1044	chr1-155988936-155989736	126	chr1-155988936-155989736	801	1	ENSG00000116584	1	ARHGEF2	exon	1	0	0	-0.143299	-0.305857	-1.02073	-1.0041	-1.35611	-1.3857	-0.545811	-0.153818	0.309604	2.45642	0.851493	0.353449	0.136396	1.55818	0.806887	-0.789629	0.232621
1045	chr1-155989978-155990307	126	chr1-155989978-155990307	330	1	ENSG00000116584	1	ARHGEF2	exon	1	0	0	-0.143299	-0.305857	-1.02073	-1.0041	-1.35611	-1.3857	-0.545811	-0.153818	0.309604	2.45642	0.851493	0.353449	0.136396	1.55818	0.806887	-0.789629	0.232621
1046	chr1-156076451-156077292	126	chr1-156076451-156077292	842	1	ENSG00000254726	1	MEX3A	exon	0	4411	0	-0.143299	-0.305857	-1.02073	-1.0041	-1.35611	-1.3857	-0.545811	-0.153818	0.309604	2.45642	0.851493	0.353449	0.136396	1.55818	0.806887	-0.789629	0.232621
1047	chr1-156102507-156103164	126	chr1-156102507-156103164	658	0	ENSG00000160789	1	LMNA	intron	0	3493	0	-0.143299	-0.305857	-1.02073	-1.0041	-1.35611	-1.3857	-0.545811	-0.153818	0.309604	2.45642	0.851493	0.353449	0.136396	1.55818	0.806887	-0.789629	0.232621
1048	chr1-156103488-156104634	126	chr1-156103488-156104634	1147	0	ENSG00000160789	1	LMNA	intron	0	2023	0	-0.143299	-0.305857	-1.02073	-1.0041	-1.35611	-1.3857	-0.545811	-0.153818	0.309604	2.45642	0.851493	0.353449	0.136396	1.55818	0.806887	-0.789629	0.232621
1049	chr1-156119900-156120234	126	chr1-156119900-156120234	335	0	ENSG00000160789	1	LMNA	intron	0	2907	0	-0.143299	-0.305857	-1.02073	-1.0041	-1.35611	-1.3857	-0.545811	-0.153818	0.309604	2.45642	0.851493	0.353449	0.136396	1.55818	0.806887	-0.789629	0.232621
1050	chr1-156122613-156124099	126	chr1-156122613-156124099	1487	1	ENSG00000160789	1	LMNA	exon	1	0	0	-0.143299	-0.305857	-1.02073	-1.0041	-1.35611	-1.3857	-0.545811	-0.153818	0.309604	2.45642	0.851493	0.353449	0.136396	1.55818	0.806887	-0.789629	0.232621
1051	chr1-156126044-156126620	126	chr1-156126044-156126620	577	1	ENSG00000160789	1	LMNA	exon	1	0	0	-0.143299	-0.305857	-1.02073	-1.0041	-1.35611	-1.3857	-0.545811	-0.153818	0.309604	2.45642	0.851493	0.353449	0.136396	1.55818	0.806887	-0.789629	0.232621
1052	chr1-156127137-156127439	126	chr1-156127137-156127439	303	0	ENSG00000160789	1	LMNA	intron	0	581	0	-0.143299	-0.305857	-1.02073	-1.0041	-1.35611	-1.3857	-0.545811	-0.153818	0.309604	2.45642	0.851493	0.353449	0.136396	1.55818	0.806887	-0.789629	0.232621
1053	chr1-156128652-156129660	126	chr1-156128652-156129660	1009	0	ENSG00000160789	1	LMNA	intron	0	2096	0	-0.143299	-0.305857	-1.02073	-1.0041	-1.35611	-1.3857	-0.545811	-0.153818	0.309604	2.45642	0.851493	0.353449	0.136396	1.55818	0.806887	-0.789629	0.232621
1054	chr1-156137088-156137301	126	chr1-156137088-156137301	214	1	ENSG00000160789	1	LMNA	exon	1	160	0	-0.143299	-0.305857	-1.02073	-1.0041	-1.35611	-1.3857	-0.545811	-0.153818	0.309604	2.45642	0.851493	0.353449	0.136396	1.55818	0.806887	-0.789629	0.232621
1055	chr1-156138324-156138638	126	chr1-156138324-156138638	315	1	ENSG00000160789	1	LMNA	exon	0	861	0	-0.143299	-0.305857	-1.02073	-1.0041	-1.35611	-1.3857	-0.545811	-0.153818	0.309604	2.45642	0.851493	0.353449	0.136396	1.55818	0.806887	-0.789629	0.232621
1056	chr1-156139411-156139816	126	chr1-156139411-156139816	406	1	ENSG00000160789	1	LMNA	exon	0	1948	0	-0.143299	-0.305857	-1.02073	-1.0041	-1.35611	-1.3857	-0.545811	-0.153818	0.309604	2.45642	0.851493	0.353449	0.136396	1.55818	0.806887	-0.789629	0.232621
1057	chr1-156140130-156140503	126	chr1-156140130-156140503	374	0		0		intergenic	0	2667	0	-0.143299	-0.305857	-1.02073	-1.0041	-1.35611	-1.3857	-0.545811	-0.153818	0.309604	2.45642	0.851493	0.353449	0.136396	1.55818	0.806887	-0.789629	0.232621
1058	chr1-156140699-156141588	126	chr1-156140699-156141588	890	0		0		intergenic	0	3236	0	-0.143299	-0.305857	-1.02073	-1.0041	-1.35611	-1.3857	-0.545811	-0.153818	0.309604	2.45642	0.851493	0.353449	0.136396	1.55818	0.806887	-0.789629	0.232621
1059	chr1-156148294-156148601	126	chr1-156148294-156148601	308	0	ENSG00000196189	1	SEMA4A	promoter	1	918	0	-0.143299	-0.305857	-1.02073	-1.0041	-1.35611	-1.3857	-0.545811	-0.153818	0.309604	2.45642	0.851493	0.353449	0.136396	1.55818	0.806887	-0.789629	0.232621
1060	chr1-156151391-156151667	126	chr1-156151391-156151667	277	0	ENSG00000196189	1	SEMA4A	promoter	1	1187	0	-0.143299	-0.305857	-1.02073	-1.0041	-1.35611	-1.3857	-0.545811	-0.153818	0.309604	2.45642	0.851493	0.353449	0.136396	1.55818	0.806887	-0.789629	0.232621
1061	chr1-156154253-156154592	126	chr1-156154253-156154592	340	1	ENSG00000196189	1	SEMA4A	exon	1	0	0	-0.143299	-0.305857	-1.02073	-1.0041	-1.35611	-1.3857	-0.545811	-0.153818	0.309604	2.45642	0.851493	0.353449	0.136396	1.55818	0.806887	-0.789629	0.232621
1062	chr1-156181396-156182229	126	chr1-156181396-156182229	834	0		0		intergenic	0	6062	0	-0.143299	-0.305857	-1.02073	-1.0041	-1.35611	-1.3857	-0.545811	-0.153818	0.309604	2.45642	0.851493	0.353449	0.136396	1.55818	0.806887	-0.789629	0.232621
1063	chr1-156251144-156252081	126	chr1-156251144-156252081	938	1	ENSG00000198952	1	SMG5	exon	1	0	0	-0.143299	-0.305857	-1.02073	-1.0041	-1.35611	-1.3857	-0.545811	-0.153818	0.309604	2.45642	0.851493	0.353449	0.136396	1.55818	0.806887	-0.789629	0.232621
1064	chr1-156448413-156448867	126	chr1-156448413-156448867	455	0		0		intergenic	0	17711	0	-0.143299	-0.305857	-1.02073	-1.0041	-1.35611	-1.3857	-0.545811	-0.153818	0.309604	2.45642	0.851493	0.353449	0.136396	1.55818	0.806887	-0.789629	0.232621
1065	chr1-156463859-156464740	126	chr1-156463859-156464740	882	1	ENSG00000116604	1	MEF2D	exon	0	15039	0	-0.143299	-0.305857	-1.02073	-1.0041	-1.35611	-1.3857	-0.545811	-0.153818	0.309604	2.45642	0.851493	0.353449	0.136396	1.55818	0.806887	-0.789629	0.232621
1066	chr1-156465788-156466844	126	chr1-156465788-156466844	1057	1	ENSG00000116604	1	MEF2D	exon	0	12935	0	-0.143299	-0.305857	-1.02073	-1.0041	-1.35611	-1.3857	-0.545811	-0.153818	0.309604	2.45642	0.851493	0.353449	0.136396	1.55818	0.806887	-0.789629	0.232621
1067	chr1-156494222-156494594	126	chr1-156494222-156494594	373	0	ENSG00000116604	1	MEF2D	intron	0	3622	0	-0.143299	-0.305857	-1.02073	-1.0041	-1.35611	-1.3857	-0.545811	-0.153818	0.309604	2.45642	0.851493	0.353449	0.136396	1.55818	0.806887	-0.789629	0.232621
1068	chr1-156502845-156503125	126	chr1-156502845-156503125	281	0		0		intergenic	0	2016	0	-0.143299	-0.305857	-1.02073	-1.0041	-1.35611	-1.3857	-0.545811	-0.153818	0.309604	2.45642	0.851493	0.353449	0.136396	1.55818	0.806887	-0.789629	0.232621
1069	chr1-156503276-156503609	126	chr1-156503276-156503609	334	0		0		intergenic	0	2447	0	-0.143299	-0.305857	-1.02073	-1.0041	-1.35611	-1.3857	-0.545811	-0.153818	0.309604	2.45642	0.851493	0.353449	0.136396	1.55818	0.806887	-0.789629	0.232621
1070	chr1-156504804-156505624	126	chr1-156504804-156505624	821	0		0		intergenic	0	3975	0	-0.143299	-0.305857	-1.02073	-1.0041	-1.35611	-1.3857	-0.545811	-0.153818	0.309604	2.45642	0.851493	0.353449	0.136396	1.55818	0.806887	-0.789629	0.232621
1071	chr1-156508280-156508919	126	chr1-156508280-156508919	640	0		0		intergenic	0	7451	0	-0.143299	-0.305857	-1.02073	-1.0041	-1.35611	-1.3857	-0.545811	-0.153818	0.309604	2.45642	0.851493	0.353449	0.136396	1.55818	0.806887	-0.789629	0.232621
1072	chr1-156552916-156553340	126	chr1-156552916-156553340	425	0	ENSG00000183856	1	IQGAP3	intron	0	13450	0	-0.143299	-0.305857	-1.02073	-1.0041	-1.35611	-1.3857	-0.545811	-0.153818	0.309604	2.45642	0.851493	0.353449	0.136396	1.55818	0.806887	-0.789629	0.232621
1073	chr1-156615184-156615643	126	chr1-156615184-156615643	460	0		0		intergenic	0	3650	0	-0.143299	-0.305857	-1.02073	-1.0041	-1.35611	-1.3857	-0.545811	-0.153818	0.309604	2.45642	0.851493	0.353449	0.136396	1.55818	0.806887	-0.789629	0.232621
1074	chr1-156615888-156616983	126	chr1-156615888-156616983	1096	0		0		intergenic	0	2310	0	-0.143299	-0.305857	-1.02073	-1.0041	-1.35611	-1.3857	-0.545811	-0.153818	0.309604	2.45642	0.851493	0.353449	0.136396	1.55818	0.806887	-0.789629	0.232621
1075	chr1-156641552-156642648	126	chr1-156641552-156642648	1097	1	ENSG00000132692	1	BCAN	exon	1	0	0	-0.143299	-0.305857	-1.02073	-1.0041	-1.35611	-1.3857	-0.545811	-0.153818	0.309604	2.45642	0.851493	0.353449	0.136396	1.55818	0.806887	-0.789629	0.232621
1076	chr1-156656707-156657755	126	chr1-156656707-156657755	1049	1	ENSG00000132692	1	BCAN	exon	1	0	0	-0.143299	-0.305857	-1.02073	-1.0041	-1.35611	-1.3857	-0.545811	-0.153818	0.309604	2.45642	0.851493	0.353449	0.136396	1.55818	0.806887	-0.789629	0.232621
1077	chr1-156659782-156660658	126	chr1-156659782-156660658	877	0		0		intergenic	0	3052	0	-0.143299	-0.305857	-1.02073	-1.0041	-1.35611	-1.3857	-0.545811	-0.153818	0.309604	2.45642	0.851493	0.353449	0.136396	1.55818	0.806887	-0.789629	0.232621
1078	chr1-156661111-156661667	126	chr1-156661111-156661667	557	0		0		intergenic	0	4381	0	-0.143299	-0.305857	-1.02073	-1.0041	-1.35611	-1.3857	-0.545811	-0.153818	0.309604	2.45642	0.851493	0.353449	0.136396	1.55818	0.806887	-0.789629	0.232621
1079	chr1-156661890-156662232	126	chr1-156661890-156662232	343	0		0		intergenic	0	5160	0	-0.143299	-0.305857	-1.02073	-1.0041	-1.35611	-1.3857	-0.545811	-0.153818	0.309604	2.45642	0.851493	0.353449	0.136396	1.55818	0.806887	-0.789629	0.232621
1080	chr1-156664472-156665396	126	chr1-156664472-156665396	925	0		0		intergenic	0	7742	0	-0.143299	-0.305857	-1.02073	-1.0041	-1.35611	-1.3857	-0.545811	-0.153818	0.309604	2.45642	0.851493	0.353449	0.136396	1.55818	0.806887	-0.789629	0.232621
1081	chr1-156670313-156671127	126	chr1-156670313-156671127	815	1	ENSG00000132688	1	NES	exon	0	6269	0	-0.143299	-0.305857	-1.02073	-1.0041	-1.35611	-1.3857	-0.545811	-0.153818	0.309604	2.45642	0.851493	0.353449	0.136396	1.55818	0.806887	-0.789629	0.232621
1082	chr1-156688975-156690246	126	chr1-156688975-156690246	1272	0		0		intergenic	0	11577	0	-0.143299	-0.305857	-1.02073	-1.0041	-1.35611	-1.3857	-0.545811	-0.153818	0.309604	2.45642	0.851493	0.353449	0.136396	1.55818	0.806887	-0.789629	0.232621
1083	chr1-156690363-156690674	126	chr1-156690363-156690674	312	0		0		intergenic	0	12965	0	-0.143299	-0.305857	-1.02073	-1.0041	-1.35611	-1.3857	-0.545811	-0.153818	0.309604	2.45642	0.851493	0.353449	0.136396	1.55818	0.806887	-0.789629	0.232621
1084	chr1-156711006-156711735	126	chr1-156711006-156711735	730	0		0		intergenic	0	5189	0	-0.143299	-0.305857	-1.02073	-1.0041	-1.35611	-1.3857	-0.545811	-0.153818	0.309604	2.45642	0.851493	0.353449	0.136396	1.55818	0.806887	-0.789629	0.232621
1085	chr1-156746482-156747651	126	chr1-156746482-156747651	1170	1	ENSG00000143321	1	HDGF	exon	1	0	0	-0.143299	-0.305857	-1.02073	-1.0041	-1.35611	-1.3857	-0.545811	-0.153818	0.309604	2.45642	0.851493	0.353449	0.136396	1.55818	0.806887	-0.789629	0.232621
1086	chr1-156748675-156749187	126	chr1-156748675-156749187	513	0	ENSG00000143294	1	PRCC	promoter	1	1203	0	-0.143299	-0.305857	-1.02073	-1.0041	-1.35611	-1.3857	-0.545811	-0.153818	0.309604	2.45642	0.851493	0.353449	0.136396	1.55818	0.806887	-0.789629	0.232621
1087	chr1-156801208-156801988	126	chr1-156801208-156801988	781	0		0		intergenic	0	5395	0	-0.143299	-0.305857	-1.02073	-1.0041	-1.35611	-1.3857	-0.545811	-0.153818	0.309604	2.45642	0.851493	0.353449	0.136396	1.55818	0.806887	-0.789629	0.232621
1088	chr1-156805824-156806834	126	chr1-156805824-156806834	1011	1	ENSG00000027869	1	SH2D2A	exon	0	7276	0	-0.143299	-0.305857	-1.02073	-1.0041	-1.35611	-1.3857	-0.545811	-0.153818	0.309604	2.45642	0.851493	0.353449	0.136396	1.55818	0.806887	-0.789629	0.232621
1089	chr1-156811192-156811450	126	chr1-156811192-156811450	259	0	ENSG00000027869	1	SH2D2A	intron	0	2660	0	-0.143299	-0.305857	-1.02073	-1.0041	-1.35611	-1.3857	-0.545811	-0.153818	0.309604	2.45642	0.851493	0.353449	0.136396	1.55818	0.806887	-0.789629	0.232621
1090	chr1-156815319-156815886	126	chr1-156815319-156815886	568	1	ENSG00000198400	1	NTRK1	exon	1	0	0	-0.143299	-0.305857	-1.02073	-1.0041	-1.35611	-1.3857	-0.545811	-0.153818	0.309604	2.45642	0.851493	0.353449	0.136396	1.55818	0.806887	-0.789629	0.232621
1091	chr1-156884328-156885065	126	chr1-156884328-156885065	738	0		0		intergenic	0	4326	0	-0.143299	-0.305857	-1.02073	-1.0041	-1.35611	-1.3857	-0.545811	-0.153818	0.309604	2.45642	0.851493	0.353449	0.136396	1.55818	0.806887	-0.789629	0.232621
1092	chr1-156886503-156886815	126	chr1-156886503-156886815	313	0		0		intergenic	0	6501	0	-0.143299	-0.305857	-1.02073	-1.0041	-1.35611	-1.3857	-0.545811	-0.153818	0.309604	2.45642	0.851493	0.353449	0.136396	1.55818	0.806887	-0.789629	0.232621
1093	chr1-156886976-156887641	126	chr1-156886976-156887641	666	0		0		intergenic	0	6056	0	-0.143299	-0.305857	-1.02073	-1.0041	-1.35611	-1.3857	-0.545811	-0.153818	0.309604	2.45642	0.851493	0.353449	0.136396	1.55818	0.806887	-0.789629	0.232621
1094	chr1-156891982-156892769	126	chr1-156891982-156892769	788	0	ENSG00000187800	0	PEAR1	promoter	1	928	0	-0.143299	-0.305857	-1.02073	-1.0041	-1.35611	-1.3857	-0.545811	-0.153818	0.309604	2.45642	0.851493	0.353449	0.136396	1.55818	0.806887	-0.789629	0.232621
1095	chr1-156893125-156894185	126	chr1-156893125-156894185	1061	1	ENSG00000187800	1	PEAR1	exon	1	0	0	-0.143299	-0.305857	-1.02073	-1.0041	-1.35611	-1.3857	-0.545811	-0.153818	0.309604	2.45642	0.851493	0.353449	0.136396	1.55818	0.806887	-0.789629	0.232621
1096	chr1-156894446-156895252	126	chr1-156894446-156895252	807	0	ENSG00000187800	1	PEAR1	intron	0	714	0	-0.143299	-0.305857	-1.02073	-1.0041	-1.35611	-1.3857	-0.545811	-0.153818	0.309604	2.45642	0.851493	0.353449	0.136396	1.55818	0.806887	-0.789629	0.232621
1097	chr1-156898058-156898571	126	chr1-156898058-156898571	514	0	ENSG00000187800	1	PEAR1	intron	0	4326	0	-0.143299	-0.305857	-1.02073	-1.0041	-1.35611	-1.3857	-0.545811	-0.153818	0.309604	2.45642	0.851493	0.353449	0.136396	1.55818	0.806887	-0.789629	0.232621
1098	chr1-156899903-156900529	126	chr1-156899903-156900529	627	0	ENSG00000187800	1	PEAR1	intron	0	5787	0	-0.143299	-0.305857	-1.02073	-1.0041	-1.35611	-1.3857	-0.545811	-0.153818	0.309604	2.45642	0.851493	0.353449	0.136396	1.55818	0.806887	-0.789629	0.232621
1099	chr1-156901888-156902305	126	chr1-156901888-156902305	418	1	ENSG00000187800	1	PEAR1	exon	0	4011	0	-0.143299	-0.305857	-1.02073	-1.0041	-1.35611	-1.3857	-0.545811	-0.153818	0.309604	2.45642	0.851493	0.353449	0.136396	1.55818	0.806887	-0.789629	0.232621
1100	chr1-156904089-156904550	126	chr1-156904089-156904550	462	0	ENSG00000187800	1	PEAR1	promoter	1	1766	0	-0.143299	-0.305857	-1.02073	-1.0041	-1.35611	-1.3857	-0.545811	-0.153818	0.309604	2.45642	0.851493	0.353449	0.136396	1.55818	0.806887	-0.789629	0.232621
1101	chr1-156906910-156907685	126	chr1-156906910-156907685	776	1	ENSG00000187800	1	PEAR1	exon	0	592	0	-0.143299	-0.305857	-1.02073	-1.0041	-1.35611	-1.3857	-0.545811	-0.153818	0.309604	2.45642	0.851493	0.353449	0.136396	1.55818	0.806887	-0.789629	0.232621
1102	chr1-156920122-156920917	126	chr1-156920122-156920917	796	1	ENSG00000160838	1	LRRC71	exon	1	0	0	-0.143299	-0.305857	-1.02073	-1.0041	-1.35611	-1.3857	-0.545811	-0.153818	0.309604	2.45642	0.851493	0.353449	0.136396	1.55818	0.806887	-0.789629	0.232621
1103	chr1-156935518-156936224	126	chr1-156935518-156936224	707	1	ENSG00000132694	1	ARHGEF11	exon	0	3419	0	-0.143299	-0.305857	-1.02073	-1.0041	-1.35611	-1.3857	-0.545811	-0.153818	0.309604	2.45642	0.851493	0.353449	0.136396	1.55818	0.806887	-0.789629	0.232621
1104	chr1-157089823-157091126	126	chr1-157089823-157091126	1304	0		0		intergenic	0	8681	0	-0.143299	-0.305857	-1.02073	-1.0041	-1.35611	-1.3857	-0.545811	-0.153818	0.309604	2.45642	0.851493	0.353449	0.136396	1.55818	0.806887	-0.789629	0.232621
1105	chr1-157092658-157093294	126	chr1-157092658-157093294	637	1	ENSG00000253831	1	ETV3L	exon	0	6513	0	-0.143299	-0.305857	-1.02073	-1.0041	-1.35611	-1.3857	-0.545811	-0.153818	0.309604	2.45642	0.851493	0.353449	0.136396	1.55818	0.806887	-0.789629	0.232621
1106	chr1-155869929-155870825	125	chr1-155869929-155870825	897	0	ENSG00000132718	1	SYT11	intron	0	10419	0	-0.215201	-0.208644	0.741362	1.48503	2.06402	1.72238	0.895613	-0.667574	-0.886617	-0.974447	-1.1281	-0.937779	-0.832974	-0.796698	-0.593113	-0.00286481	0.335614
1107	chr1-155871020-155871916	125	chr1-155871020-155871916	897	0	ENSG00000132718	1	SYT11	intron	0	11510	0	-0.215201	-0.208644	0.741362	1.48503	2.06402	1.72238	0.895613	-0.667574	-0.886617	-0.974447	-1.1281	-0.937779	-0.832974	-0.796698	-0.593113	-0.00286481	0.335614
1108	chr1-155872151-155872872	125	chr1-155872151-155872872	722	0	ENSG00000132718	1	SYT11	intron	0	12641	0	-0.215201	-0.208644	0.741362	1.48503	2.06402	1.72238	0.895613	-0.667574	-0.886617	-0.974447	-1.1281	-0.937779	-0.832974	-0.796698	-0.593113	-0.00286481	0.335614
1109	chr1-156069540-156070990	125	chr1-156069540-156070990	1451	1	ENSG00000132698	1	RAB25	exon	0	1327	0	-0.215201	-0.208644	0.741362	1.48503	2.06402	1.72238	0.895613	-0.667574	-0.886617	-0.974447	-1.1281	-0.937779	-0.832974	-0.796698	-0.593113	-0.00286481	0.335614
1110	chr1-156209090-156209608	125	chr1-156209090-156209608	519	0	ENSG00000160785	1	SLC25A44	intron	0	3373	0	-0.215201	-0.208644	0.741362	1.48503	2.06402	1.72238	0.895613	-0.667574	-0.886617	-0.974447	-1.1281	-0.937779	-0.832974	-0.796698	-0.593113	-0.00286481	0.335614
1111	chr1-156247760-156248295	125	chr1-156247760-156248295	536	1	ENSG00000160781	1	PAQR6	exon	1	0	0	-0.215201	-0.208644	0.741362	1.48503	2.06402	1.72238	0.895613	-0.667574	-0.886617	-0.974447	-1.1281	-0.937779	-0.832974	-0.796698	-0.593113	-0.00286481	0.335614
1112	chr1-156343969-156345153	125	chr1-156343969-156345153	1185	1	ENSG00000163467	1	TSACC	exon	0	5066	0	-0.215201	-0.208644	0.741362	1.48503	2.06402	1.72238	0.895613	-0.667574	-0.886617	-0.974447	-1.1281	-0.937779	-0.832974	-0.796698	-0.593113	-0.00286481	0.335614
1113	chr1-156356448-156357331	125	chr1-156356448-156357331	884	0	ENSG00000163468	1	CCT3	intron	0	10505	0	-0.215201	-0.208644	0.741362	1.48503	2.06402	1.72238	0.895613	-0.667574	-0.886617	-0.974447	-1.1281	-0.937779	-0.832974	-0.796698	-0.593113	-0.00286481	0.335614
1114	chr1-156359824-156360281	125	chr1-156359824-156360281	458	0	ENSG00000163468	1	CCT3	intron	0	7555	0	-0.215201	-0.208644	0.741362	1.48503	2.06402	1.72238	0.895613	-0.667574	-0.886617	-0.974447	-1.1281	-0.937779	-0.832974	-0.796698	-0.593113	-0.00286481	0.335614
1115	chr1-156368812-156369597	125	chr1-156368812-156369597	786	1	ENSG00000132677	1	RHBG	exon	1	0	0	-0.215201	-0.208644	0.741362	1.48503	2.06402	1.72238	0.895613	-0.667574	-0.886617	-0.974447	-1.1281	-0.937779	-0.832974	-0.796698	-0.593113	-0.00286481	0.335614
1116	chr1-156509389-156510250	125	chr1-156509389-156510250	862	0		0		intergenic	0	8560	0	-0.215201	-0.208644	0.741362	1.48503	2.06402	1.72238	0.895613	-0.667574	-0.886617	-0.974447	-1.1281	-0.937779	-0.832974	-0.796698	-0.593113	-0.00286481	0.335614
1117	chr1-156581594-156582767	125	chr1-156581594-156582767	1174	1	ENSG00000187862	1	TTC24	exon	1	0	0	-0.215201	-0.208644	0.741362	1.48503	2.06402	1.72238	0.895613	-0.667574	-0.886617	-0.974447	-1.1281	-0.937779	-0.832974	-0.796698	-0.593113	-0.00286481	0.335614
1118	chr1-156700630-156701333	125	chr1-156700630-156701333	704	1	ENSG00000143320	1	CRABP2	exon	0	4267	0	-0.215201	-0.208644	0.741362	1.48503	2.06402	1.72238	0.895613	-0.667574	-0.886617	-0.974447	-1.1281	-0.937779	-0.832974	-0.796698	-0.593113	-0.00286481	0.335614
1119	chr1-156851799-156852950	125	chr1-156851799-156852950	1152	1	ENSG00000027644	1	INSRR	exon	0	6067	0	-0.215201	-0.208644	0.741362	1.48503	2.06402	1.72238	0.895613	-0.667574	-0.886617	-0.974447	-1.1281	-0.937779	-0.832974	-0.796698	-0.593113	-0.00286481	0.335614
1120	chr1-156932087-156933484	125	chr1-156932087-156933484	1398	1	ENSG00000160838	1	LRRC71	exon	1	0	0	-0.215201	-0.208644	0.741362	1.48503	2.06402	1.72238	0.895613	-0.667574	-0.886617	-0.974447	-1.1281	-0.937779	-0.832974	-0.796698	-0.593113	-0.00286481	0.335614
1121	chr1-15602702-15604145	154	chr1-15602702-15604145	1444	0		0		intergenic	0	13354	0	0.755896	0.385008	-0.0297437	-0.51829	-1.20296	-0.601656	0.250108	-0.481408	0.348209	0.576694	0.311143	-0.403787	-0.649791	3.07509	-0.698589	-1.6079	0.491976
1122	chr1-15974911-15976306	154	chr1-15974911-15976306	1396	1	ENSG00000116809	1	ZBTB17	exon	1	0	0	0.755896	0.385008	-0.0297437	-0.51829	-1.20296	-0.601656	0.250108	-0.481408	0.348209	0.576694	0.311143	-0.403787	-0.649791	3.07509	-0.698589	-1.6079	0.491976
1123	chr1-16032217-16033361	154	chr1-16032217-16033361	1145	1	ENSG00000186510	1	CLCNKA	exon	0	5377	0	0.755896	0.385008	-0.0297437	-0.51829	-1.20296	-0.601656	0.250108	-0.481408	0.348209	0.576694	0.311143	-0.403787	-0.649791	3.07509	-0.698589	-1.6079	0.491976
1124	chr1-16215874-16216637	154	chr1-16215874-16216637	764	0		0		intergenic	0	3264	0	0.755896	0.385008	-0.0297437	-0.51829	-1.20296	-0.601656	0.250108	-0.481408	0.348209	0.576694	0.311143	-0.403787	-0.649791	3.07509	-0.698589	-1.6079	0.491976
1125	chr1-16216926-16218282	154	chr1-16216926-16218282	1357	0		0		intergenic	0	4316	0	0.755896	0.385008	-0.0297437	-0.51829	-1.20296	-0.601656	0.250108	-0.481408	0.348209	0.576694	0.311143	-0.403787	-0.649791	3.07509	-0.698589	-1.6079	0.491976
1126	chr1-16236065-16237534	154	chr1-16236065-16237534	1470	1	ENSG00000132881	1	RSG1	exon	1	0	0	0.755896	0.385008	-0.0297437	-0.51829	-1.20296	-0.601656	0.250108	-0.481408	0.348209	0.576694	0.311143	-0.403787	-0.649791	3.07509	-0.698589	-1.6079	0.491976
1127	chr1-16440127-16441589	154	chr1-16440127-16441589	1463	1	ENSG00000157191	1	NECAP2	exon	1	0	0	0.755896	0.385008	-0.0297437	-0.51829	-1.20296	-0.601656	0.250108	-0.481408	0.348209	0.576694	0.311143	-0.403787	-0.649791	3.07509	-0.698589	-1.6079	0.491976
1128	chr1-156789921-156790408	129	chr1-156789921-156790408	488	0	ENSG00000143294	1	PRCC	promoter	1	967	0	3.95978	-0.381871	-0.123312	-0.278373	0.119892	-0.20976	-0.175545	-0.297776	-0.345859	-0.325058	-0.398772	-0.388068	-0.264072	0.0243491	-0.197722	-0.389151	-0.328679
1129	chr1-157080711-157081261	129	chr1-157080711-157081261	551	0		0		intergenic	0	18546	0	3.95978	-0.381871	-0.123312	-0.278373	0.119892	-0.20976	-0.175545	-0.297776	-0.345859	-0.325058	-0.398772	-0.388068	-0.264072	0.0243491	-0.197722	-0.389151	-0.328679
1130	chr1-157132073-157132983	129	chr1-157132073-157132983	911	0	ENSG00000117036	1	ETV3	intron	0	5351	0	3.95978	-0.381871	-0.123312	-0.278373	0.119892	-0.20976	-0.175545	-0.297776	-0.345859	-0.325058	-0.398772	-0.388068	-0.264072	0.0243491	-0.197722	-0.389151	-0.328679
1131	chr1-15691321-15691973	146	chr1-15691321-15691973	653	0	ENSG00000116786	1	PLEKHM2	intron	0	6779	0	-0.40095	0.333853	-0.707315	-0.602704	-1.0773	-1.0337	-0.385327	0.147796	0.343931	3.44154	0.737879	0.498862	0.184379	-0.646416	-0.151099	-0.361718	-0.321708
1132	chr1-15714278-15714934	146	chr1-15714278-15714934	657	0	ENSG00000116786	1	PLEKHM2	intron	0	14910	0	-0.40095	0.333853	-0.707315	-0.602704	-1.0773	-1.0337	-0.385327	0.147796	0.343931	3.44154	0.737879	0.498862	0.184379	-0.646416	-0.151099	-0.361718	-0.321708
1133	chr1-15753736-15754077	146	chr1-15753736-15754077	342	0		0		intergenic	0	2529	0	-0.40095	0.333853	-0.707315	-0.602704	-1.0773	-1.0337	-0.385327	0.147796	0.343931	3.44154	0.737879	0.498862	0.184379	-0.646416	-0.151099	-0.361718	-0.321708
1134	chr1-15760399-15761270	146	chr1-15760399-15761270	872	0	ENSG00000162458	1	FBLIM1	intron	0	1601	0	-0.40095	0.333853	-0.707315	-0.602704	-1.0773	-1.0337	-0.385327	0.147796	0.343931	3.44154	0.737879	0.498862	0.184379	-0.646416	-0.151099	-0.361718	-0.321708
1135	chr1-15792832-15793414	146	chr1-15792832-15793414	583	0		0		intergenic	0	15758	0	-0.40095	0.333853	-0.707315	-0.602704	-1.0773	-1.0337	-0.385327	0.147796	0.343931	3.44154	0.737879	0.498862	0.184379	-0.646416	-0.151099	-0.361718	-0.321708
1136	chr1-15798882-15799730	146	chr1-15798882-15799730	849	0		0		intergenic	0	9617	0	-0.40095	0.333853	-0.707315	-0.602704	-1.0773	-1.0337	-0.385327	0.147796	0.343931	3.44154	0.737879	0.498862	0.184379	-0.646416	-0.151099	-0.361718	-0.321708
1137	chr1-15830647-15831333	146	chr1-15830647-15831333	687	0		0		intergenic	0	16530	0	-0.40095	0.333853	-0.707315	-0.602704	-1.0773	-1.0337	-0.385327	0.147796	0.343931	3.44154	0.737879	0.498862	0.184379	-0.646416	-0.151099	-0.361718	-0.321708
1138	chr1-16012559-16013612	146	chr1-16012559-16013612	1054	0		0		intergenic	0	4212	0	-0.40095	0.333853	-0.707315	-0.602704	-1.0773	-1.0337	-0.385327	0.147796	0.343931	3.44154	0.737879	0.498862	0.184379	-0.646416	-0.151099	-0.361718	-0.321708
1139	chr1-16017348-16018579	146	chr1-16017348-16018579	1232	1	ENSG00000186510	1	CLCNKA	exon	1	0	0	-0.40095	0.333853	-0.707315	-0.602704	-1.0773	-1.0337	-0.385327	0.147796	0.343931	3.44154	0.737879	0.498862	0.184379	-0.646416	-0.151099	-0.361718	-0.321708
1140	chr1-16019519-16019944	146	chr1-16019519-16019944	426	1	ENSG00000186510	1	CLCNKA	exon	1	0	0	-0.40095	0.333853	-0.707315	-0.602704	-1.0773	-1.0337	-0.385327	0.147796	0.343931	3.44154	0.737879	0.498862	0.184379	-0.646416	-0.151099	-0.361718	-0.321708
1141	chr1-16075222-16075507	146	chr1-16075222-16075507	286	0	ENSG00000185519	0	FAM131C	promoter	1	1589	0	-0.40095	0.333853	-0.707315	-0.602704	-1.0773	-1.0337	-0.385327	0.147796	0.343931	3.44154	0.737879	0.498862	0.184379	-0.646416	-0.151099	-0.361718	-0.321708
1142	chr1-16076083-16076306	146	chr1-16076083-16076306	224	0		0		intergenic	0	2450	0	-0.40095	0.333853	-0.707315	-0.602704	-1.0773	-1.0337	-0.385327	0.147796	0.343931	3.44154	0.737879	0.498862	0.184379	-0.646416	-0.151099	-0.361718	-0.321708
1143	chr1-16127293-16128758	146	chr1-16127293-16128758	1466	0	ENSG00000142627	1	EPHA2	intron	0	4803	0	-0.40095	0.333853	-0.707315	-0.602704	-1.0773	-1.0337	-0.385327	0.147796	0.343931	3.44154	0.737879	0.498862	0.184379	-0.646416	-0.151099	-0.361718	-0.321708
1144	chr1-16181427-16182389	146	chr1-16181427-16182389	963	0		0		intergenic	0	24136	0	-0.40095	0.333853	-0.707315	-0.602704	-1.0773	-1.0337	-0.385327	0.147796	0.343931	3.44154	0.737879	0.498862	0.184379	-0.646416	-0.151099	-0.361718	-0.321708
1145	chr1-157162115-157162670	131	chr1-157162115-157162670	556	0		0		intergenic	0	23640	0	-0.303568	0.120328	-0.384501	-0.178581	-0.37361	-0.410853	0.119433	-0.374845	-0.00970974	-0.448622	0.0745412	-0.263946	-0.220501	-0.464489	-0.440222	3.92223	-0.363085
1146	chr1-157310217-157310954	131	chr1-157310217-157310954	738	0		0		intergenic	0	171742	0	-0.303568	0.120328	-0.384501	-0.178581	-0.37361	-0.410853	0.119433	-0.374845	-0.00970974	-0.448622	0.0745412	-0.263946	-0.220501	-0.464489	-0.440222	3.92223	-0.363085
1147	chr1-157311109-157311548	131	chr1-157311109-157311548	440	0		0		intergenic	0	172634	0	-0.303568	0.120328	-0.384501	-0.178581	-0.37361	-0.410853	0.119433	-0.374845	-0.00970974	-0.448622	0.0745412	-0.263946	-0.220501	-0.464489	-0.440222	3.92223	-0.363085
1148	chr1-15734838-15735298	132	chr1-15734838-15735298	461	0	ENSG00000162461	0	SLC25A34	promoter	1	1106	0	3.7063	-0.523171	-0.610452	-0.280418	-0.415076	-0.716594	0.469841	-0.143221	-0.551738	-0.384898	-0.372527	0.3202	-0.150537	0.665484	-0.341389	-0.570119	-0.10168
1149	chr1-15735317-15735611	132	chr1-15735317-15735611	295	0	ENSG00000162461	0	SLC25A34	promoter	1	793	0	3.7063	-0.523171	-0.610452	-0.280418	-0.415076	-0.716594	0.469841	-0.143221	-0.551738	-0.384898	-0.372527	0.3202	-0.150537	0.665484	-0.341389	-0.570119	-0.10168
1150	chr1-15950699-15951826	132	chr1-15950699-15951826	1128	0	ENSG00000116809	1	ZBTB17	intron	0	1146	0	3.7063	-0.523171	-0.610452	-0.280418	-0.415076	-0.716594	0.469841	-0.143221	-0.551738	-0.384898	-0.372527	0.3202	-0.150537	0.665484	-0.341389	-0.570119	-0.10168
1151	chr1-157965545-157966565	136	chr1-157965545-157966565	1021	0		0		intergenic	0	26707	0	-0.614539	0.0433712	-0.23911	0.437883	0.115684	-0.237122	0.749194	0.0781244	-0.36928	-0.631864	-0.425023	-0.631142	-0.0899125	-0.703469	-0.607709	3.66782	-0.54291
1152	chr1-158122870-158123202	136	chr1-158122870-158123202	333	0		0		intergenic	0	36189	0	-0.614539	0.0433712	-0.23911	0.437883	0.115684	-0.237122	0.749194	0.0781244	-0.36928	-0.631864	-0.425023	-0.631142	-0.0899125	-0.703469	-0.607709	3.66782	-0.54291
1153	chr1-158123968-158124442	136	chr1-158123968-158124442	475	0		0		intergenic	0	37287	0	-0.614539	0.0433712	-0.23911	0.437883	0.115684	-0.237122	0.749194	0.0781244	-0.36928	-0.631864	-0.425023	-0.631142	-0.0899125	-0.703469	-0.607709	3.66782	-0.54291
1154	chr1-15799973-15800803	156	chr1-15799973-15800803	831	0		0		intergenic	0	8544	0	2.82496	1.41749	0.919289	0.300268	-0.246217	0.00520449	0.632818	-0.864374	-0.792927	-0.277044	-0.934048	-0.842732	-0.939197	-0.117633	-1.27662	0.227255	-0.0364991
1155	chr1-16026242-16027420	156	chr1-16026242-16027420	1179	1	ENSG00000186510	1	CLCNKA	exon	1	0	0	2.82496	1.41749	0.919289	0.300268	-0.246217	0.00520449	0.632818	-0.864374	-0.792927	-0.277044	-0.934048	-0.842732	-0.939197	-0.117633	-1.27662	0.227255	-0.0364991
1156	chr1-16048098-16049105	156	chr1-16048098-16049105	1008	1	ENSG00000184908	1	CLCNKB	exon	1	0	0	2.82496	1.41749	0.919289	0.300268	-0.246217	0.00520449	0.632818	-0.864374	-0.792927	-0.277044	-0.934048	-0.842732	-0.939197	-0.117633	-1.27662	0.227255	-0.0364991
1157	chr1-16055685-16056646	156	chr1-16055685-16056646	962	1	ENSG00000184908	1	CLCNKB	exon	0	3361	0	2.82496	1.41749	0.919289	0.300268	-0.246217	0.00520449	0.632818	-0.864374	-0.792927	-0.277044	-0.934048	-0.842732	-0.939197	-0.117633	-1.27662	0.227255	-0.0364991
1158	chr1-16162099-16162825	156	chr1-16162099-16162825	727	0		0		intergenic	0	6011	0	2.82496	1.41749	0.919289	0.300268	-0.246217	0.00520449	0.632818	-0.864374	-0.792927	-0.277044	-0.934048	-0.842732	-0.939197	-0.117633	-1.27662	0.227255	-0.0364991
1159	chr1-16167212-16168350	156	chr1-16167212-16168350	1139	0		0		intergenic	0	11124	0	2.82496	1.41749	0.919289	0.300268	-0.246217	0.00520449	0.632818	-0.864374	-0.792927	-0.277044	-0.934048	-0.842732	-0.939197	-0.117633	-1.27662	0.227255	-0.0364991
1160	chr1-16226315-16227305	156	chr1-16226315-16227305	991	0		0		intergenic	0	9353	0	2.82496	1.41749	0.919289	0.300268	-0.246217	0.00520449	0.632818	-0.864374	-0.792927	-0.277044	-0.934048	-0.842732	-0.939197	-0.117633	-1.27662	0.227255	-0.0364991
1161	chr1-158007365-158008456	134	chr1-158007365-158008456	1092	0	ENSG00000183853	1	KIRREL	intron	0	13754	0	-0.656955	-0.134362	1.81162	0.772585	2.35462	1.55393	0.485853	-0.112494	-0.326381	-0.625972	-0.720461	-0.637294	-0.385116	-0.981812	-0.880115	-0.788865	-0.728779
1162	chr1-158027555-158028456	134	chr1-158027555-158028456	902	0	ENSG00000183853	1	KIRREL	intron	0	33944	0	-0.656955	-0.134362	1.81162	0.772585	2.35462	1.55393	0.485853	-0.112494	-0.326381	-0.625972	-0.720461	-0.637294	-0.385116	-0.981812	-0.880115	-0.788865	-0.728779
1163	chr1-158484798-158485813	134	chr1-158484798-158485813	1016	0		0		intergenic	0	4919	0	-0.656955	-0.134362	1.81162	0.772585	2.35462	1.55393	0.485853	-0.112494	-0.326381	-0.625972	-0.720461	-0.637294	-0.385116	-0.981812	-0.880115	-0.788865	-0.728779
1164	chr1-158509171-158510445	134	chr1-158509171-158510445	1275	0		0		intergenic	0	29292	0	-0.656955	-0.134362	1.81162	0.772585	2.35462	1.55393	0.485853	-0.112494	-0.326381	-0.625972	-0.720461	-0.637294	-0.385116	-0.981812	-0.880115	-0.788865	-0.728779
1165	chr1-158534234-158535210	134	chr1-158534234-158535210	977	0		0		intergenic	0	12894	0	-0.656955	-0.134362	1.81162	0.772585	2.35462	1.55393	0.485853	-0.112494	-0.326381	-0.625972	-0.720461	-0.637294	-0.385116	-0.981812	-0.880115	-0.788865	-0.728779
1166	chr1-158733574-158734434	134	chr1-158733574-158734434	861	0		0		intergenic	0	15410	0	-0.656955	-0.134362	1.81162	0.772585	2.35462	1.55393	0.485853	-0.112494	-0.326381	-0.625972	-0.720461	-0.637294	-0.385116	-0.981812	-0.880115	-0.788865	-0.728779
1167	chr1-158739821-158740406	134	chr1-158739821-158740406	586	0		0		intergenic	0	14313	0	-0.656955	-0.134362	1.81162	0.772585	2.35462	1.55393	0.485853	-0.112494	-0.326381	-0.625972	-0.720461	-0.637294	-0.385116	-0.981812	-0.880115	-0.788865	-0.728779
1168	chr1-158150502-158150781	138	chr1-158150502-158150781	280	0		0		intergenic	0	29165	0	-0.229592	-0.262484	-0.26275	-0.261093	-0.259067	-0.266254	-0.252972	-0.262097	-0.257648	-0.253074	-0.248137	-0.263638	-0.260256	3.99852	-0.146269	-0.25529	-0.257902
1169	chr1-158185786-158186042	138	chr1-158185786-158186042	257	0		0		intergenic	0	5838	0	-0.229592	-0.262484	-0.26275	-0.261093	-0.259067	-0.266254	-0.252972	-0.262097	-0.257648	-0.253074	-0.248137	-0.263638	-0.260256	3.99852	-0.146269	-0.25529	-0.257902
1170	chr1-158248125-158248409	138	chr1-158248125-158248409	285	0		0		intergenic	0	5727	0	-0.229592	-0.262484	-0.26275	-0.261093	-0.259067	-0.266254	-0.252972	-0.262097	-0.257648	-0.253074	-0.248137	-0.263638	-0.260256	3.99852	-0.146269	-0.25529	-0.257902
1171	chr1-158285624-158286235	138	chr1-158285624-158286235	612	0		0		intergenic	0	3550	0	-0.229592	-0.262484	-0.26275	-0.261093	-0.259067	-0.266254	-0.252972	-0.262097	-0.257648	-0.253074	-0.248137	-0.263638	-0.260256	3.99852	-0.146269	-0.25529	-0.257902
1172	chr1-158809880-158810235	140	chr1-158809880-158810235	356	0		0		intergenic	0	21081	0	-0.451412	-0.226437	-0.391014	-0.492505	-0.487901	-0.30549	-0.481684	-0.452016	-0.322026	-0.138003	-0.238382	-0.240529	-0.539219	2.87049	2.56565	-0.394597	-0.274933
1173	chr1-158830984-158831445	140	chr1-158830984-158831445	462	1	ENSG00000163563	1	MNDA	exon	1	0	0	-0.451412	-0.226437	-0.391014	-0.492505	-0.487901	-0.30549	-0.481684	-0.452016	-0.322026	-0.138003	-0.238382	-0.240529	-0.539219	2.87049	2.56565	-0.394597	-0.274933
1174	chr1-159009392-159010591	140	chr1-159009392-159010591	1200	1	ENSG00000163565	1	IFI16	exon	1	0	0	-0.451412	-0.226437	-0.391014	-0.492505	-0.487901	-0.30549	-0.481684	-0.452016	-0.322026	-0.138003	-0.238382	-0.240529	-0.539219	2.87049	2.56565	-0.394597	-0.274933
1175	chr1-159012397-159012890	140	chr1-159012397-159012890	494	0	ENSG00000163565	1	IFI16	promoter	1	1790	0	-0.451412	-0.226437	-0.391014	-0.492505	-0.487901	-0.30549	-0.481684	-0.452016	-0.322026	-0.138003	-0.238382	-0.240529	-0.539219	2.87049	2.56565	-0.394597	-0.274933
1176	chr1-159015490-159015860	140	chr1-159015490-159015860	371	1	ENSG00000163565	1	IFI16	exon	1	0	0	-0.451412	-0.226437	-0.391014	-0.492505	-0.487901	-0.30549	-0.481684	-0.452016	-0.322026	-0.138003	-0.238382	-0.240529	-0.539219	2.87049	2.56565	-0.394597	-0.274933
1177	chr1-159067799-159068624	140	chr1-159067799-159068624	826	1	ENSG00000163568	1	AIM2	exon	0	4640	0	-0.451412	-0.226437	-0.391014	-0.492505	-0.487901	-0.30549	-0.481684	-0.452016	-0.322026	-0.138003	-0.238382	-0.240529	-0.539219	2.87049	2.56565	-0.394597	-0.274933
1178	chr1-159076731-159077589	140	chr1-159076731-159077589	859	1	ENSG00000163568	1	AIM2	exon	1	0	0	-0.451412	-0.226437	-0.391014	-0.492505	-0.487901	-0.30549	-0.481684	-0.452016	-0.322026	-0.138003	-0.238382	-0.240529	-0.539219	2.87049	2.56565	-0.394597	-0.274933
1179	chr1-159204126-159205432	140	chr1-159204126-159205432	1307	1	ENSG00000213088	1	ACKR1	exon	1	0	0	-0.451412	-0.226437	-0.391014	-0.492505	-0.487901	-0.30549	-0.481684	-0.452016	-0.322026	-0.138003	-0.238382	-0.240529	-0.539219	2.87049	2.56565	-0.394597	-0.274933
1180	chr1-159211039-159211919	140	chr1-159211039-159211919	881	0		0		intergenic	0	5779	0	-0.451412	-0.226437	-0.391014	-0.492505	-0.487901	-0.30549	-0.481684	-0.452016	-0.322026	-0.138003	-0.238382	-0.240529	-0.539219	2.87049	2.56565	-0.394597	-0.274933
1181	chr1-159408658-159409338	140	chr1-159408658-159409338	681	0		0		intergenic	0	30383	0	-0.451412	-0.226437	-0.391014	-0.492505	-0.487901	-0.30549	-0.481684	-0.452016	-0.322026	-0.138003	-0.238382	-0.240529	-0.539219	2.87049	2.56565	-0.394597	-0.274933
1182	chr1-159141489-159142366	139	chr1-159141489-159142366	878	0	ENSG00000163568	1	AIM2	promoter	1	980	0	0.926011	0.100618	-0.447593	0.212621	-0.369465	-0.528419	0.827959	-0.692289	-0.720952	0.0884466	-0.631937	-0.643358	-0.187812	-0.493688	-0.363212	-0.573456	3.49653
1183	chr1-159171087-159172533	139	chr1-159171087-159172533	1447	1	ENSG00000162706	1	CADM3	exon	1	0	0	0.926011	0.100618	-0.447593	0.212621	-0.369465	-0.528419	0.827959	-0.692289	-0.720952	0.0884466	-0.631937	-0.643358	-0.187812	-0.493688	-0.363212	-0.573456	3.49653
1184	chr1-159172689-159173370	139	chr1-159172689-159173370	682	0	ENSG00000162706	1	CADM3	intron	0	929	0	0.926011	0.100618	-0.447593	0.212621	-0.369465	-0.528419	0.827959	-0.692289	-0.720952	0.0884466	-0.631937	-0.643358	-0.187812	-0.493688	-0.363212	-0.573456	3.49653
1185	chr1-159738825-159740210	144	chr1-159738825-159740210	1386	0		0		intergenic	0	24235	0	-0.488652	-0.329529	-0.00538067	-0.0870287	0.311226	0.0714064	-0.227472	-0.687151	-0.753581	-0.404477	-0.779812	-0.593183	-0.665191	3.38507	1.5127	0.0993996	-0.358338
1186	chr1-159751743-159752602	144	chr1-159751743-159752602	860	0		0		intergenic	0	28329	0	-0.488652	-0.329529	-0.00538067	-0.0870287	0.311226	0.0714064	-0.227472	-0.687151	-0.753581	-0.404477	-0.779812	-0.593183	-0.665191	3.38507	1.5127	0.0993996	-0.358338
1187	chr1-159779172-159779983	144	chr1-159779172-159779983	812	0	ENSG00000158716	0	DUSP23	promoter	1	948	0	-0.488652	-0.329529	-0.00538067	-0.0870287	0.311226	0.0714064	-0.227472	-0.687151	-0.753581	-0.404477	-0.779812	-0.593183	-0.665191	3.38507	1.5127	0.0993996	-0.358338
1188	chr1-159821220-159821774	144	chr1-159821220-159821774	555	0		0		intergenic	0	4975	0	-0.488652	-0.329529	-0.00538067	-0.0870287	0.311226	0.0714064	-0.227472	-0.687151	-0.753581	-0.404477	-0.779812	-0.593183	-0.665191	3.38507	1.5127	0.0993996	-0.358338
1189	chr1-159822846-159823882	144	chr1-159822846-159823882	1037	0		0		intergenic	0	2867	0	-0.488652	-0.329529	-0.00538067	-0.0870287	0.311226	0.0714064	-0.227472	-0.687151	-0.753581	-0.404477	-0.779812	-0.593183	-0.665191	3.38507	1.5127	0.0993996	-0.358338
1190	chr1-159826390-159826864	144	chr1-159826390-159826864	475	1	ENSG00000158714	1	SLAMF8	exon	1	0	0	-0.488652	-0.329529	-0.00538067	-0.0870287	0.311226	0.0714064	-0.227472	-0.687151	-0.753581	-0.404477	-0.779812	-0.593183	-0.665191	3.38507	1.5127	0.0993996	-0.358338
1191	chr1-159829081-159829543	144	chr1-159829081-159829543	463	0	ENSG00000158714	1	SLAMF8	promoter	1	464	0	-0.488652	-0.329529	-0.00538067	-0.0870287	0.311226	0.0714064	-0.227472	-0.687151	-0.753581	-0.404477	-0.779812	-0.593183	-0.665191	3.38507	1.5127	0.0993996	-0.358338
1192	chr1-159830928-159832127	144	chr1-159830928-159832127	1200	0	ENSG00000158714	1	SLAMF8	promoter	1	877	0	-0.488652	-0.329529	-0.00538067	-0.0870287	0.311226	0.0714064	-0.227472	-0.687151	-0.753581	-0.404477	-0.779812	-0.593183	-0.665191	3.38507	1.5127	0.0993996	-0.358338
1193	chr1-159867080-159868222	144	chr1-159867080-159868222	1143	0	ENSG00000256029	1	RP11-190A12.7	intron	0	4422	0	-0.488652	-0.329529	-0.00538067	-0.0870287	0.311226	0.0714064	-0.227472	-0.687151	-0.753581	-0.404477	-0.779812	-0.593183	-0.665191	3.38507	1.5127	0.0993996	-0.358338
1194	chr1-159881442-159882251	144	chr1-159881442-159882251	810	0	ENSG00000213085	1	CFAP45	promoter	1	741	0	-0.488652	-0.329529	-0.00538067	-0.0870287	0.311226	0.0714064	-0.227472	-0.687151	-0.753581	-0.404477	-0.779812	-0.593183	-0.665191	3.38507	1.5127	0.0993996	-0.358338
1195	chr1-159889553-159890732	144	chr1-159889553-159890732	1180	1	ENSG00000213085	1	CFAP45	exon	0	7536	0	-0.488652	-0.329529	-0.00538067	-0.0870287	0.311226	0.0714064	-0.227472	-0.687151	-0.753581	-0.404477	-0.779812	-0.593183	-0.665191	3.38507	1.5127	0.0993996	-0.358338
1196	chr1-159891346-159891924	144	chr1-159891346-159891924	579	0	ENSG00000213085	1	CFAP45	intron	0	6344	0	-0.488652	-0.329529	-0.00538067	-0.0870287	0.311226	0.0714064	-0.227472	-0.687151	-0.753581	-0.404477	-0.779812	-0.593183	-0.665191	3.38507	1.5127	0.0993996	-0.358338
1197	chr1-159895881-159896395	144	chr1-159895881-159896395	515	0	ENSG00000213085	1	CFAP45	intron	0	1873	0	-0.488652	-0.329529	-0.00538067	-0.0870287	0.311226	0.0714064	-0.227472	-0.687151	-0.753581	-0.404477	-0.779812	-0.593183	-0.665191	3.38507	1.5127	0.0993996	-0.358338
1198	chr1-159899662-159900680	144	chr1-159899662-159900680	1019	1	ENSG00000213085	1	CFAP45	exon	1	0	0	-0.488652	-0.329529	-0.00538067	-0.0870287	0.311226	0.0714064	-0.227472	-0.687151	-0.753581	-0.404477	-0.779812	-0.593183	-0.665191	3.38507	1.5127	0.0993996	-0.358338
1199	chr1-159900824-159901390	144	chr1-159900824-159901390	567	0	ENSG00000213085	0	CFAP45	promoter	1	660	0	-0.488652	-0.329529	-0.00538067	-0.0870287	0.311226	0.0714064	-0.227472	-0.687151	-0.753581	-0.404477	-0.779812	-0.593183	-0.665191	3.38507	1.5127	0.0993996	-0.358338
1200	chr1-159910040-159910918	144	chr1-159910040-159910918	879	0		0		intergenic	0	9876	0	-0.488652	-0.329529	-0.00538067	-0.0870287	0.311226	0.0714064	-0.227472	-0.687151	-0.753581	-0.404477	-0.779812	-0.593183	-0.665191	3.38507	1.5127	0.0993996	-0.358338
1201	chr1-159913574-159914167	144	chr1-159913574-159914167	594	0		0		intergenic	0	9549	0	-0.488652	-0.329529	-0.00538067	-0.0870287	0.311226	0.0714064	-0.227472	-0.687151	-0.753581	-0.404477	-0.779812	-0.593183	-0.665191	3.38507	1.5127	0.0993996	-0.358338
1202	chr1-159941158-159942024	144	chr1-159941158-159942024	867	0	ENSG00000085552	1	IGSF9	intron	0	3568	0	-0.488652	-0.329529	-0.00538067	-0.0870287	0.311226	0.0714064	-0.227472	-0.687151	-0.753581	-0.404477	-0.779812	-0.593183	-0.665191	3.38507	1.5127	0.0993996	-0.358338
1203	chr1-159963946-159965009	144	chr1-159963946-159965009	1064	0		0		intergenic	0	9691	0	-0.488652	-0.329529	-0.00538067	-0.0870287	0.311226	0.0714064	-0.227472	-0.687151	-0.753581	-0.404477	-0.779812	-0.593183	-0.665191	3.38507	1.5127	0.0993996	-0.358338
1204	chr1-160046244-160047109	144	chr1-160046244-160047109	866	0	ENSG00000177807	1	KCNJ10	intron	0	3948	0	-0.488652	-0.329529	-0.00538067	-0.0870287	0.311226	0.0714064	-0.227472	-0.687151	-0.753581	-0.404477	-0.779812	-0.593183	-0.665191	3.38507	1.5127	0.0993996	-0.358338
1205	chr1-160083358-160084570	144	chr1-160083358-160084570	1213	1	ENSG00000162728	1	KCNJ9	exon	0	1787	0	-0.488652	-0.329529	-0.00538067	-0.0870287	0.311226	0.0714064	-0.227472	-0.687151	-0.753581	-0.404477	-0.779812	-0.593183	-0.665191	3.38507	1.5127	0.0993996	-0.358338
1206	chr1-160207813-160208548	144	chr1-160207813-160208548	736	1	ENSG00000162734	1	PEA15	exon	0	2391	0	-0.488652	-0.329529	-0.00538067	-0.0870287	0.311226	0.0714064	-0.227472	-0.687151	-0.753581	-0.404477	-0.779812	-0.593183	-0.665191	3.38507	1.5127	0.0993996	-0.358338
1207	chr1-160347008-160347258	144	chr1-160347008-160347258	251	0	ENSG00000162736	1	NCSTN	intron	0	2397	0	-0.488652	-0.329529	-0.00538067	-0.0870287	0.311226	0.0714064	-0.227472	-0.687151	-0.753581	-0.404477	-0.779812	-0.593183	-0.665191	3.38507	1.5127	0.0993996	-0.358338
1208	chr1-160403183-160403599	144	chr1-160403183-160403599	417	0	ENSG00000162738	1	VANGL2	intron	0	2596	0	-0.488652	-0.329529	-0.00538067	-0.0870287	0.311226	0.0714064	-0.227472	-0.687151	-0.753581	-0.404477	-0.779812	-0.593183	-0.665191	3.38507	1.5127	0.0993996	-0.358338
1209	chr1-160499580-160499982	144	chr1-160499580-160499982	403	0	ENSG00000162739	1	SLAMF6	intron	0	23259	0	-0.488652	-0.329529	-0.00538067	-0.0870287	0.311226	0.0714064	-0.227472	-0.687151	-0.753581	-0.404477	-0.779812	-0.593183	-0.665191	3.38507	1.5127	0.0993996	-0.358338
1210	chr1-160574957-160575440	144	chr1-160574957-160575440	484	0	ENSG00000066294	1	CD84	intron	0	4032	0	-0.488652	-0.329529	-0.00538067	-0.0870287	0.311226	0.0714064	-0.227472	-0.687151	-0.753581	-0.404477	-0.779812	-0.593183	-0.665191	3.38507	1.5127	0.0993996	-0.358338
1211	chr1-160629471-160630281	144	chr1-160629471-160630281	811	0	ENSG00000117090	1	SLAMF1	intron	0	16676	0	-0.488652	-0.329529	-0.00538067	-0.0870287	0.311226	0.0714064	-0.227472	-0.687151	-0.753581	-0.404477	-0.779812	-0.593183	-0.665191	3.38507	1.5127	0.0993996	-0.358338
1212	chr1-160646654-160647372	144	chr1-160646654-160647372	719	1	ENSG00000117090	1	SLAMF1	exon	1	0	0	-0.488652	-0.329529	-0.00538067	-0.0870287	0.311226	0.0714064	-0.227472	-0.687151	-0.753581	-0.404477	-0.779812	-0.593183	-0.665191	3.38507	1.5127	0.0993996	-0.358338
1213	chr1-160665333-160666219	144	chr1-160665333-160666219	887	0		0		intergenic	0	18037	0	-0.488652	-0.329529	-0.00538067	-0.0870287	0.311226	0.0714064	-0.227472	-0.687151	-0.753581	-0.404477	-0.779812	-0.593183	-0.665191	3.38507	1.5127	0.0993996	-0.358338
1214	chr1-160704258-160704541	144	chr1-160704258-160704541	284	0	ENSG00000117091	1	CD48	intron	0	7261	0	-0.488652	-0.329529	-0.00538067	-0.0870287	0.311226	0.0714064	-0.227472	-0.687151	-0.753581	-0.404477	-0.779812	-0.593183	-0.665191	3.38507	1.5127	0.0993996	-0.358338
1215	chr1-160711578-160712190	144	chr1-160711578-160712190	613	1	ENSG00000117091	1	CD48	exon	1	0	0	-0.488652	-0.329529	-0.00538067	-0.0870287	0.311226	0.0714064	-0.227472	-0.687151	-0.753581	-0.404477	-0.779812	-0.593183	-0.665191	3.38507	1.5127	0.0993996	-0.358338
1216	chr1-160712712-160713085	144	chr1-160712712-160713085	374	0	ENSG00000117091	0	CD48	promoter	1	860	0	-0.488652	-0.329529	-0.00538067	-0.0870287	0.311226	0.0714064	-0.227472	-0.687151	-0.753581	-0.404477	-0.779812	-0.593183	-0.665191	3.38507	1.5127	0.0993996	-0.358338
1217	chr1-160767803-160768597	144	chr1-160767803-160768597	795	0		0		intergenic	0	17379	0	-0.488652	-0.329529	-0.00538067	-0.0870287	0.311226	0.0714064	-0.227472	-0.687151	-0.753581	-0.404477	-0.779812	-0.593183	-0.665191	3.38507	1.5127	0.0993996	-0.358338
1218	chr1-160782160-160782584	144	chr1-160782160-160782584	425	0		0		intergenic	0	13489	0	-0.488652	-0.329529	-0.00538067	-0.0870287	0.311226	0.0714064	-0.227472	-0.687151	-0.753581	-0.404477	-0.779812	-0.593183	-0.665191	3.38507	1.5127	0.0993996	-0.358338
1219	chr1-160789575-160790267	144	chr1-160789575-160790267	693	0		0		intergenic	0	5806	0	-0.488652	-0.329529	-0.00538067	-0.0870287	0.311226	0.0714064	-0.227472	-0.687151	-0.753581	-0.404477	-0.779812	-0.593183	-0.665191	3.38507	1.5127	0.0993996	-0.358338
1220	chr1-160795796-160796325	144	chr1-160795796-160796325	530	1	ENSG00000122224	1	LY9	exon	1	0	0	-0.488652	-0.329529	-0.00538067	-0.0870287	0.311226	0.0714064	-0.227472	-0.687151	-0.753581	-0.404477	-0.779812	-0.593183	-0.665191	3.38507	1.5127	0.0993996	-0.358338
1221	chr1-160862625-160862930	144	chr1-160862625-160862930	306	1	ENSG00000122223	1	CD244	exon	1	0	0	-0.488652	-0.329529	-0.00538067	-0.0870287	0.311226	0.0714064	-0.227472	-0.687151	-0.753581	-0.404477	-0.779812	-0.593183	-0.665191	3.38507	1.5127	0.0993996	-0.358338
1222	chr1-160863464-160864441	144	chr1-160863464-160864441	978	0	ENSG00000122223	0	CD244	promoter	1	608	0	-0.488652	-0.329529	-0.00538067	-0.0870287	0.311226	0.0714064	-0.227472	-0.687151	-0.753581	-0.404477	-0.779812	-0.593183	-0.665191	3.38507	1.5127	0.0993996	-0.358338
1223	chr1-160997183-160997926	144	chr1-160997183-160997926	744	1	ENSG00000158769	1	F11R	exon	0	3250	0	-0.488652	-0.329529	-0.00538067	-0.0870287	0.311226	0.0714064	-0.227472	-0.687151	-0.753581	-0.404477	-0.779812	-0.593183	-0.665191	3.38507	1.5127	0.0993996	-0.358338
1224	chr1-161013168-161014531	144	chr1-161013168-161014531	1364	0	ENSG00000270149	1	RP11-544M22.13	intron	0	6564	0	-0.488652	-0.329529	-0.00538067	-0.0870287	0.311226	0.0714064	-0.227472	-0.687151	-0.753581	-0.404477	-0.779812	-0.593183	-0.665191	3.38507	1.5127	0.0993996	-0.358338
1225	chr1-161068069-161068669	144	chr1-161068069-161068669	601	0	ENSG00000186517	1	ARHGAP30	intron	0	996	0	-0.488652	-0.329529	-0.00538067	-0.0870287	0.311226	0.0714064	-0.227472	-0.687151	-0.753581	-0.404477	-0.779812	-0.593183	-0.665191	3.38507	1.5127	0.0993996	-0.358338
1226	chr1-161069588-161070153	144	chr1-161069588-161070153	566	1	ENSG00000186517	1	ARHGAP30	exon	1	0	0	-0.488652	-0.329529	-0.00538067	-0.0870287	0.311226	0.0714064	-0.227472	-0.687151	-0.753581	-0.404477	-0.779812	-0.593183	-0.665191	3.38507	1.5127	0.0993996	-0.358338
1227	chr1-161071835-161072175	144	chr1-161071835-161072175	341	1	ENSG00000143217	1	NECTIN4	exon	1	1864	0	-0.488652	-0.329529	-0.00538067	-0.0870287	0.311226	0.0714064	-0.227472	-0.687151	-0.753581	-0.404477	-0.779812	-0.593183	-0.665191	3.38507	1.5127	0.0993996	-0.358338
1228	chr1-161082834-161083851	144	chr1-161082834-161083851	1018	0	ENSG00000143217	1	NECTIN4	intron	0	5747	0	-0.488652	-0.329529	-0.00538067	-0.0870287	0.311226	0.0714064	-0.227472	-0.687151	-0.753581	-0.404477	-0.779812	-0.593183	-0.665191	3.38507	1.5127	0.0993996	-0.358338
1229	chr1-161088811-161089853	144	chr1-161088811-161089853	1043	1	ENSG00000143217	1	NECTIN4	exon	1	0	0	-0.488652	-0.329529	-0.00538067	-0.0870287	0.311226	0.0714064	-0.227472	-0.687151	-0.753581	-0.404477	-0.779812	-0.593183	-0.665191	3.38507	1.5127	0.0993996	-0.358338
1230	chr1-161121824-161122075	144	chr1-161121824-161122075	252	1	ENSG00000158796	1	DEDD	exon	1	231	0	-0.488652	-0.329529	-0.00538067	-0.0870287	0.311226	0.0714064	-0.227472	-0.687151	-0.753581	-0.404477	-0.779812	-0.593183	-0.665191	3.38507	1.5127	0.0993996	-0.358338
1231	chr1-161185160-161186256	144	chr1-161185160-161186256	1097	1	ENSG00000158859	1	ADAMTS4	exon	0	7191	0	-0.488652	-0.329529	-0.00538067	-0.0870287	0.311226	0.0714064	-0.227472	-0.687151	-0.753581	-0.404477	-0.779812	-0.593183	-0.665191	3.38507	1.5127	0.0993996	-0.358338
1232	chr1-161215042-161215345	144	chr1-161215042-161215345	304	1	ENSG00000158869	1	FCER1G	exon	1	0	0	-0.488652	-0.329529	-0.00538067	-0.0870287	0.311226	0.0714064	-0.227472	-0.687151	-0.753581	-0.404477	-0.779812	-0.593183	-0.665191	3.38507	1.5127	0.0993996	-0.358338
1233	chr1-161216392-161217747	144	chr1-161216392-161217747	1356	0	ENSG00000158869	1	FCER1G	intron	0	1094	0	-0.488652	-0.329529	-0.00538067	-0.0870287	0.311226	0.0714064	-0.227472	-0.687151	-0.753581	-0.404477	-0.779812	-0.593183	-0.665191	3.38507	1.5127	0.0993996	-0.358338
1234	chr1-161358869-161359830	144	chr1-161358869-161359830	962	0	ENSG00000143252	1	SDHC	intron	0	8043	0	-0.488652	-0.329529	-0.00538067	-0.0870287	0.311226	0.0714064	-0.227472	-0.687151	-0.753581	-0.404477	-0.779812	-0.593183	-0.665191	3.38507	1.5127	0.0993996	-0.358338
1235	chr1-161499480-161500023	144	chr1-161499480-161500023	544	0		0		intergenic	0	5406	0	-0.488652	-0.329529	-0.00538067	-0.0870287	0.311226	0.0714064	-0.227472	-0.687151	-0.753581	-0.404477	-0.779812	-0.593183	-0.665191	3.38507	1.5127	0.0993996	-0.358338
1236	chr1-161505077-161506005	144	chr1-161505077-161506005	929	1	ENSG00000143226	1	FCGR2A	exon	1	0	0	-0.488652	-0.329529	-0.00538067	-0.0870287	0.311226	0.0714064	-0.227472	-0.687151	-0.753581	-0.404477	-0.779812	-0.593183	-0.665191	3.38507	1.5127	0.0993996	-0.358338
1237	chr1-161506256-161507419	144	chr1-161506256-161507419	1164	1	ENSG00000143226	1	FCGR2A	exon	1	0	0	-0.488652	-0.329529	-0.00538067	-0.0870287	0.311226	0.0714064	-0.227472	-0.687151	-0.753581	-0.404477	-0.779812	-0.593183	-0.665191	3.38507	1.5127	0.0993996	-0.358338
1238	chr1-161561213-161561633	144	chr1-161561213-161561633	421	0		0		intergenic	0	10475	0	-0.488652	-0.329529	-0.00538067	-0.0870287	0.311226	0.0714064	-0.227472	-0.687151	-0.753581	-0.404477	-0.779812	-0.593183	-0.665191	3.38507	1.5127	0.0993996	-0.358338
1239	chr1-161738617-161739284	144	chr1-161738617-161739284	668	0		0		intergenic	0	10473	0	-0.488652	-0.329529	-0.00538067	-0.0870287	0.311226	0.0714064	-0.227472	-0.687151	-0.753581	-0.404477	-0.779812	-0.593183	-0.665191	3.38507	1.5127	0.0993996	-0.358338
1240	chr1-161771955-161772846	144	chr1-161771955-161772846	892	0	ENSG00000118217	1	ATF6	intron	0	5660	0	-0.488652	-0.329529	-0.00538067	-0.0870287	0.311226	0.0714064	-0.227472	-0.687151	-0.753581	-0.404477	-0.779812	-0.593183	-0.665191	3.38507	1.5127	0.0993996	-0.358338
1241	chr1-162003094-162004151	144	chr1-162003094-162004151	1058	0	ENSG00000162745	1	OLFML2B	intron	0	17861	0	-0.488652	-0.329529	-0.00538067	-0.0870287	0.311226	0.0714064	-0.227472	-0.687151	-0.753581	-0.404477	-0.779812	-0.593183	-0.665191	3.38507	1.5127	0.0993996	-0.358338
1242	chr1-162028711-162029537	144	chr1-162028711-162029537	827	0		0		intergenic	0	4856	0	-0.488652	-0.329529	-0.00538067	-0.0870287	0.311226	0.0714064	-0.227472	-0.687151	-0.753581	-0.404477	-0.779812	-0.593183	-0.665191	3.38507	1.5127	0.0993996	-0.358338
1243	chr1-159841214-159842376	141	chr1-159841214-159842376	1163	1	ENSG00000188004	1	C1orf204	exon	0	8208	0	-0.679839	1.96007	-0.608911	-0.807168	-0.748335	-0.869613	-0.481194	-0.352417	1.45196	0.340674	2.49894	0.12061	0.155733	-0.795008	-0.697621	0.113988	-0.601866
1244	chr1-159960424-159961499	141	chr1-159960424-159961499	1076	0		0		intergenic	0	6169	0	-0.679839	1.96007	-0.608911	-0.807168	-0.748335	-0.869613	-0.481194	-0.352417	1.45196	0.340674	2.49894	0.12061	0.155733	-0.795008	-0.697621	0.113988	-0.601866
1245	chr1-159979065-159979900	141	chr1-159979065-159979900	836	0		0		intergenic	0	24810	0	-0.679839	1.96007	-0.608911	-0.807168	-0.748335	-0.869613	-0.481194	-0.352417	1.45196	0.340674	2.49894	0.12061	0.155733	-0.795008	-0.697621	0.113988	-0.601866
1246	chr1-160053424-160053960	142	chr1-160053424-160053960	537	0	ENSG00000177807	1	KCNJ10	intron	0	11128	0	-0.833109	-0.782245	-0.87028	0.281994	-0.408751	-0.441826	-0.208995	0.199159	-0.329441	0.307934	-0.201688	1.98023	0.0872598	-0.54718	-0.948208	-0.278585	2.99373
1247	chr1-160061303-160062623	142	chr1-160061303-160062623	1321	0	ENSG00000177807	1	KCNJ10	intron	0	7491	0	-0.833109	-0.782245	-0.87028	0.281994	-0.408751	-0.441826	-0.208995	0.199159	-0.329441	0.307934	-0.201688	1.98023	0.0872598	-0.54718	-0.948208	-0.278585	2.99373
1248	chr1-160068180-160068529	142	chr1-160068180-160068529	350	0	ENSG00000177807	1	KCNJ10	intron	0	1585	0	-0.833109	-0.782245	-0.87028	0.281994	-0.408751	-0.441826	-0.208995	0.199159	-0.329441	0.307934	-0.201688	1.98023	0.0872598	-0.54718	-0.948208	-0.278585	2.99373
1249	chr1-160102660-160103141	142	chr1-160102660-160103141	482	0		0		intergenic	0	3716	0	-0.833109	-0.782245	-0.87028	0.281994	-0.408751	-0.441826	-0.208995	0.199159	-0.329441	0.307934	-0.201688	1.98023	0.0872598	-0.54718	-0.948208	-0.278585	2.99373
1250	chr1-160103651-160104861	142	chr1-160103651-160104861	1211	0		0		intergenic	0	4707	0	-0.833109	-0.782245	-0.87028	0.281994	-0.408751	-0.441826	-0.208995	0.199159	-0.329441	0.307934	-0.201688	1.98023	0.0872598	-0.54718	-0.948208	-0.278585	2.99373
1251	chr1-160108922-160109894	142	chr1-160108922-160109894	973	0		0		intergenic	0	5864	0	-0.833109	-0.782245	-0.87028	0.281994	-0.408751	-0.441826	-0.208995	0.199159	-0.329441	0.307934	-0.201688	1.98023	0.0872598	-0.54718	-0.948208	-0.278585	2.99373
1252	chr1-160112161-160112833	142	chr1-160112161-160112833	673	0		0		intergenic	0	2925	0	-0.833109	-0.782245	-0.87028	0.281994	-0.408751	-0.441826	-0.208995	0.199159	-0.329441	0.307934	-0.201688	1.98023	0.0872598	-0.54718	-0.948208	-0.278585	2.99373
1253	chr1-160117476-160118229	142	chr1-160117476-160118229	754	0	ENSG00000018625	1	ATP1A2	intron	0	1698	0	-0.833109	-0.782245	-0.87028	0.281994	-0.408751	-0.441826	-0.208995	0.199159	-0.329441	0.307934	-0.201688	1.98023	0.0872598	-0.54718	-0.948208	-0.278585	2.99373
1254	chr1-160156296-160156977	142	chr1-160156296-160156977	682	0	ENSG00000132681	1	ATP1A4	intron	0	4709	0	-0.833109	-0.782245	-0.87028	0.281994	-0.408751	-0.441826	-0.208995	0.199159	-0.329441	0.307934	-0.201688	1.98023	0.0872598	-0.54718	-0.948208	-0.278585	2.99373
1255	chr1-160217416-160218185	142	chr1-160217416-160218185	770	1	ENSG00000258465	1	RP11-574F21.3	exon	0	672	0	-0.833109	-0.782245	-0.87028	0.281994	-0.408751	-0.441826	-0.208995	0.199159	-0.329441	0.307934	-0.201688	1.98023	0.0872598	-0.54718	-0.948208	-0.278585	2.99373
1256	chr1-160539803-160540937	143	chr1-160539803-160540937	1135	0		0		intergenic	0	10472	0	-0.701544	0.626216	0.414818	2.12659	0.704767	2.17396	0.594382	0.459912	-0.537294	-1.02189	-1.04814	-0.977813	-0.857525	0.1233	-0.722601	-0.516815	-0.840318
1257	chr1-160565338-160566148	143	chr1-160565338-160566148	811	1	ENSG00000066294	1	CD84	exon	0	13324	0	-0.701544	0.626216	0.414818	2.12659	0.704767	2.17396	0.594382	0.459912	-0.537294	-1.02189	-1.04814	-0.977813	-0.857525	0.1233	-0.722601	-0.516815	-0.840318
1258	chr1-160637678-160638967	143	chr1-160637678-160638967	1290	0	ENSG00000117090	1	SLAMF1	intron	0	7990	0	-0.701544	0.626216	0.414818	2.12659	0.704767	2.17396	0.594382	0.459912	-0.537294	-1.02189	-1.04814	-0.977813	-0.857525	0.1233	-0.722601	-0.516815	-0.840318
1259	chr1-160726197-160727174	143	chr1-160726197-160727174	978	0		0		intergenic	0	11882	0	-0.701544	0.626216	0.414818	2.12659	0.704767	2.17396	0.594382	0.459912	-0.537294	-1.02189	-1.04814	-0.977813	-0.857525	0.1233	-0.722601	-0.516815	-0.840318
1260	chr1-160752469-160753730	143	chr1-160752469-160753730	1262	1	ENSG00000026751	1	SLAMF7	exon	0	2045	0	-0.701544	0.626216	0.414818	2.12659	0.704767	2.17396	0.594382	0.459912	-0.537294	-1.02189	-1.04814	-0.977813	-0.857525	0.1233	-0.722601	-0.516815	-0.840318
1261	chr1-160904650-160905830	143	chr1-160904650-160905830	1181	0		0		intergenic	0	19479	0	-0.701544	0.626216	0.414818	2.12659	0.704767	2.17396	0.594382	0.459912	-0.537294	-1.02189	-1.04814	-0.977813	-0.857525	0.1233	-0.722601	-0.516815	-0.840318
1262	chr1-160907928-160908308	143	chr1-160907928-160908308	381	0		0		intergenic	0	22757	0	-0.701544	0.626216	0.414818	2.12659	0.704767	2.17396	0.594382	0.459912	-0.537294	-1.02189	-1.04814	-0.977813	-0.857525	0.1233	-0.722601	-0.516815	-0.840318
1263	chr1-160911237-160912271	143	chr1-160911237-160912271	1035	0		0		intergenic	0	26066	0	-0.701544	0.626216	0.414818	2.12659	0.704767	2.17396	0.594382	0.459912	-0.537294	-1.02189	-1.04814	-0.977813	-0.857525	0.1233	-0.722601	-0.516815	-0.840318
1264	chr1-160946694-160947695	143	chr1-160946694-160947695	1002	0	ENSG00000158764	1	ITLN2	intron	0	3316	0	-0.701544	0.626216	0.414818	2.12659	0.704767	2.17396	0.594382	0.459912	-0.537294	-1.02189	-1.04814	-0.977813	-0.857525	0.1233	-0.722601	-0.516815	-0.840318
1265	chr1-160951208-160951680	143	chr1-160951208-160951680	473	1	ENSG00000158764	1	ITLN2	exon	1	0	0	-0.701544	0.626216	0.414818	2.12659	0.704767	2.17396	0.594382	0.459912	-0.537294	-1.02189	-1.04814	-0.977813	-0.857525	0.1233	-0.722601	-0.516815	-0.840318
1266	chr1-161172937-161173379	145	chr1-161172937-161173379	443	0	ENSG00000158850	1	B4GALT3	promoter	1	526	0	-0.509845	-0.418367	-0.882518	-0.732432	-0.897427	-0.891723	-0.650113	0.558102	0.737445	3.0674	1.18892	0.597492	0.319003	-0.462949	-0.420856	-0.809629	0.207498
1267	chr1-161196913-161197532	145	chr1-161196913-161197532	620	1	ENSG00000158864	1	NDUFS2	exon	1	0	0	-0.509845	-0.418367	-0.882518	-0.732432	-0.897427	-0.891723	-0.650113	0.558102	0.737445	3.0674	1.18892	0.597492	0.319003	-0.462949	-0.420856	-0.809629	0.207498
1268	chr1-161198191-161199483	145	chr1-161198191-161199483	1293	1	ENSG00000158864	1	NDUFS2	exon	1	0	0	-0.509845	-0.418367	-0.882518	-0.732432	-0.897427	-0.891723	-0.650113	0.558102	0.737445	3.0674	1.18892	0.597492	0.319003	-0.462949	-0.420856	-0.809629	0.207498
1269	chr1-161206828-161207503	145	chr1-161206828-161207503	676	0	ENSG00000158864	1	NDUFS2	promoter	1	418	0	-0.509845	-0.418367	-0.882518	-0.732432	-0.897427	-0.891723	-0.650113	0.558102	0.737445	3.0674	1.18892	0.597492	0.319003	-0.462949	-0.420856	-0.809629	0.207498
1270	chr1-161421669-161422335	145	chr1-161421669-161422335	667	0		0		intergenic	0	53646	0	-0.509845	-0.418367	-0.882518	-0.732432	-0.897427	-0.891723	-0.650113	0.558102	0.737445	3.0674	1.18892	0.597492	0.319003	-0.462949	-0.420856	-0.809629	0.207498
1271	chr1-161274310-161275328	150	chr1-161274310-161275328	1019	0	ENSG00000248485	1	PCP4L1	intron	0	15582	0	-0.661511	-0.32022	0.299278	2.66133	1.17969	1.73246	0.730857	-0.0990064	-0.524312	-0.655406	-0.978153	-0.874697	-0.833776	-0.192388	-0.954163	0.0202934	-0.53028
1272	chr1-161367547-161368361	150	chr1-161367547-161368361	815	1	ENSG00000188931	1	CFAP126	exon	1	0	0	-0.661511	-0.32022	0.299278	2.66133	1.17969	1.73246	0.730857	-0.0990064	-0.524312	-0.655406	-0.978153	-0.874697	-0.833776	-0.192388	-0.954163	0.0202934	-0.53028
1273	chr1-161747560-161748188	150	chr1-161747560-161748188	629	0	ENSG00000081721	0	DUSP12	promoter	1	1569	0	-0.661511	-0.32022	0.299278	2.66133	1.17969	1.73246	0.730857	-0.0990064	-0.524312	-0.655406	-0.978153	-0.874697	-0.833776	-0.192388	-0.954163	0.0202934	-0.53028
1274	chr1-161605667-161606226	152	chr1-161605667-161606226	560	0		0		intergenic	0	24023	0	-0.752158	-0.0418584	-0.857451	-0.597343	-0.89713	-0.897181	-0.379318	-0.38613	0.375582	0.968912	0.920581	3.06517	0.981105	-0.662906	-0.844396	0.00993454	-0.0054094
1275	chr1-161706226-161707111	152	chr1-161706226-161707111	886	1	ENSG00000132185	1	FCRLA	exon	1	0	0	-0.752158	-0.0418584	-0.857451	-0.597343	-0.89713	-0.897181	-0.379318	-0.38613	0.375582	0.968912	0.920581	3.06517	0.981105	-0.662906	-0.844396	0.00993454	-0.0054094
1276	chr1-161791884-161793075	152	chr1-161791884-161793075	1192	1	ENSG00000118217	1	ATF6	exon	0	25589	0	-0.752158	-0.0418584	-0.857451	-0.597343	-0.89713	-0.897181	-0.379318	-0.38613	0.375582	0.968912	0.920581	3.06517	0.981105	-0.662906	-0.844396	0.00993454	-0.0054094
1277	chr1-161815808-161816546	152	chr1-161815808-161816546	739	0	ENSG00000118217	1	ATF6	intron	0	23528	0	-0.752158	-0.0418584	-0.857451	-0.597343	-0.89713	-0.897181	-0.379318	-0.38613	0.375582	0.968912	0.920581	3.06517	0.981105	-0.662906	-0.844396	0.00993454	-0.0054094
1278	chr1-161835927-161836992	152	chr1-161835927-161836992	1066	0	ENSG00000118217	1	ATF6	intron	0	3082	0	-0.752158	-0.0418584	-0.857451	-0.597343	-0.89713	-0.897181	-0.379318	-0.38613	0.375582	0.968912	0.920581	3.06517	0.981105	-0.662906	-0.844396	0.00993454	-0.0054094
1279	chr1-161838366-161839111	152	chr1-161838366-161839111	746	0	ENSG00000118217	1	ATF6	promoter	1	963	0	-0.752158	-0.0418584	-0.857451	-0.597343	-0.89713	-0.897181	-0.379318	-0.38613	0.375582	0.968912	0.920581	3.06517	0.981105	-0.662906	-0.844396	0.00993454	-0.0054094
1280	chr1-161848448-161849736	152	chr1-161848448-161849736	1289	0	ENSG00000118217	1	ATF6	intron	0	8372	0	-0.752158	-0.0418584	-0.857451	-0.597343	-0.89713	-0.897181	-0.379318	-0.38613	0.375582	0.968912	0.920581	3.06517	0.981105	-0.662906	-0.844396	0.00993454	-0.0054094
1281	chr1-161864261-161864910	152	chr1-161864261-161864910	650	0	ENSG00000118217	1	ATF6	intron	0	24185	0	-0.752158	-0.0418584	-0.857451	-0.597343	-0.89713	-0.897181	-0.379318	-0.38613	0.375582	0.968912	0.920581	3.06517	0.981105	-0.662906	-0.844396	0.00993454	-0.0054094
1282	chr1-161866143-161866781	152	chr1-161866143-161866781	639	0	ENSG00000118217	1	ATF6	intron	0	26067	0	-0.752158	-0.0418584	-0.857451	-0.597343	-0.89713	-0.897181	-0.379318	-0.38613	0.375582	0.968912	0.920581	3.06517	0.981105	-0.662906	-0.844396	0.00993454	-0.0054094
1283	chr1-161884884-161885470	152	chr1-161884884-161885470	587	0	ENSG00000118217	1	ATF6	intron	0	44808	0	-0.752158	-0.0418584	-0.857451	-0.597343	-0.89713	-0.897181	-0.379318	-0.38613	0.375582	0.968912	0.920581	3.06517	0.981105	-0.662906	-0.844396	0.00993454	-0.0054094
1284	chr1-161928555-161929055	152	chr1-161928555-161929055	501	0	ENSG00000118217	1	ATF6	intron	0	54885	0	-0.752158	-0.0418584	-0.857451	-0.597343	-0.89713	-0.897181	-0.379318	-0.38613	0.375582	0.968912	0.920581	3.06517	0.981105	-0.662906	-0.844396	0.00993454	-0.0054094
1285	chr1-161941227-161942306	152	chr1-161941227-161942306	1080	0	ENSG00000118217	1	ATF6	intron	0	41634	0	-0.752158	-0.0418584	-0.857451	-0.597343	-0.89713	-0.897181	-0.379318	-0.38613	0.375582	0.968912	0.920581	3.06517	0.981105	-0.662906	-0.844396	0.00993454	-0.0054094
1286	chr1-161946121-161946718	152	chr1-161946121-161946718	598	0	ENSG00000118217	1	ATF6	intron	0	37222	0	-0.752158	-0.0418584	-0.857451	-0.597343	-0.89713	-0.897181	-0.379318	-0.38613	0.375582	0.968912	0.920581	3.06517	0.981105	-0.662906	-0.844396	0.00993454	-0.0054094
1287	chr1-161969868-161970681	152	chr1-161969868-161970681	814	0		0		intergenic	0	13259	0	-0.752158	-0.0418584	-0.857451	-0.597343	-0.89713	-0.897181	-0.379318	-0.38613	0.375582	0.968912	0.920581	3.06517	0.981105	-0.662906	-0.844396	0.00993454	-0.0054094
1288	chr1-161981770-161983260	152	chr1-161981770-161983260	1491	1	ENSG00000162745	1	OLFML2B	exon	0	680	0	-0.752158	-0.0418584	-0.857451	-0.597343	-0.89713	-0.897181	-0.379318	-0.38613	0.375582	0.968912	0.920581	3.06517	0.981105	-0.662906	-0.844396	0.00993454	-0.0054094
1289	chr1-161986312-161986892	152	chr1-161986312-161986892	581	0	ENSG00000162745	1	OLFML2B	promoter	1	1079	0	-0.752158	-0.0418584	-0.857451	-0.597343	-0.89713	-0.897181	-0.379318	-0.38613	0.375582	0.968912	0.920581	3.06517	0.981105	-0.662906	-0.844396	0.00993454	-0.0054094
1290	chr1-161987358-161988809	152	chr1-161987358-161988809	1452	0	ENSG00000162745	1	OLFML2B	intron	0	2125	0	-0.752158	-0.0418584	-0.857451	-0.597343	-0.89713	-0.897181	-0.379318	-0.38613	0.375582	0.968912	0.920581	3.06517	0.981105	-0.662906	-0.844396	0.00993454	-0.0054094
1291	chr1-162021587-162022273	152	chr1-162021587-162022273	687	0	ENSG00000162745	1	OLFML2B	intron	0	1366	0	-0.752158	-0.0418584	-0.857451	-0.597343	-0.89713	-0.897181	-0.379318	-0.38613	0.375582	0.968912	0.920581	3.06517	0.981105	-0.662906	-0.844396	0.00993454	-0.0054094
1292	chr1-162022622-162022969	152	chr1-162022622-162022969	348	0	ENSG00000162745	1	OLFML2B	intron	0	670	0	-0.752158	-0.0418584	-0.857451	-0.597343	-0.89713	-0.897181	-0.379318	-0.38613	0.375582	0.968912	0.920581	3.06517	0.981105	-0.662906	-0.844396	0.00993454	-0.0054094
1293	chr1-162023153-162024569	152	chr1-162023153-162024569	1417	1	ENSG00000162745	1	OLFML2B	exon	1	0	0	-0.752158	-0.0418584	-0.857451	-0.597343	-0.89713	-0.897181	-0.379318	-0.38613	0.375582	0.968912	0.920581	3.06517	0.981105	-0.662906	-0.844396	0.00993454	-0.0054094
1294	chr1-162062334-162063182	152	chr1-162062334-162063182	849	0		0		intergenic	0	6591	0	-0.752158	-0.0418584	-0.857451	-0.597343	-0.89713	-0.897181	-0.379318	-0.38613	0.375582	0.968912	0.920581	3.06517	0.981105	-0.662906	-0.844396	0.00993454	-0.0054094
1295	chr1-162144751-162146194	152	chr1-162144751-162146194	1444	0	ENSG00000198929	1	NOS1AP	intron	0	74660	0	-0.752158	-0.0418584	-0.857451	-0.597343	-0.89713	-0.897181	-0.379318	-0.38613	0.375582	0.968912	0.920581	3.06517	0.981105	-0.662906	-0.844396	0.00993454	-0.0054094
1296	chr1-162196852-162197540	152	chr1-162196852-162197540	689	0	ENSG00000198929	1	NOS1AP	intron	0	126761	0	-0.752158	-0.0418584	-0.857451	-0.597343	-0.89713	-0.897181	-0.379318	-0.38613	0.375582	0.968912	0.920581	3.06517	0.981105	-0.662906	-0.844396	0.00993454	-0.0054094
1297	chr1-162235074-162235885	152	chr1-162235074-162235885	812	0	ENSG00000198929	1	NOS1AP	intron	0	124651	0	-0.752158	-0.0418584	-0.857451	-0.597343	-0.89713	-0.897181	-0.379318	-0.38613	0.375582	0.968912	0.920581	3.06517	0.981105	-0.662906	-0.844396	0.00993454	-0.0054094
1298	chr1-162334889-162335672	152	chr1-162334889-162335672	784	0	ENSG00000198929	1	NOS1AP	intron	0	24864	0	-0.752158	-0.0418584	-0.857451	-0.597343	-0.89713	-0.897181	-0.379318	-0.38613	0.375582	0.968912	0.920581	3.06517	0.981105	-0.662906	-0.844396	0.00993454	-0.0054094
1299	chr1-162389138-162390361	152	chr1-162389138-162390361	1224	0		0		intergenic	0	7407	0	-0.752158	-0.0418584	-0.857451	-0.597343	-0.89713	-0.897181	-0.379318	-0.38613	0.375582	0.968912	0.920581	3.06517	0.981105	-0.662906	-0.844396	0.00993454	-0.0054094
1300	chr1-162420786-162422045	152	chr1-162420786-162422045	1260	0		0		intergenic	0	8647	0	-0.752158	-0.0418584	-0.857451	-0.597343	-0.89713	-0.897181	-0.379318	-0.38613	0.375582	0.968912	0.920581	3.06517	0.981105	-0.662906	-0.844396	0.00993454	-0.0054094
1301	chr1-161972198-161973194	153	chr1-161972198-161973194	997	0		0		intergenic	0	10746	0	-0.298057	-0.122499	-0.437093	-0.46766	-0.450595	-0.473056	-0.415082	-0.433154	-0.392535	0.26297	-0.012751	0.107446	0.0420807	-0.366761	-0.314673	-0.128938	3.90036
1302	chr1-161993986-161994825	153	chr1-161993986-161994825	840	0	ENSG00000162745	1	OLFML2B	intron	0	8753	0	-0.298057	-0.122499	-0.437093	-0.46766	-0.450595	-0.473056	-0.415082	-0.433154	-0.392535	0.26297	-0.012751	0.107446	0.0420807	-0.366761	-0.314673	-0.128938	3.90036
1303	chr1-161994970-161995420	153	chr1-161994970-161995420	451	0	ENSG00000162745	1	OLFML2B	intron	0	9737	0	-0.298057	-0.122499	-0.437093	-0.46766	-0.450595	-0.473056	-0.415082	-0.433154	-0.392535	0.26297	-0.012751	0.107446	0.0420807	-0.366761	-0.314673	-0.128938	3.90036
1304	chr1-162541480-162542214	158	chr1-162541480-162542214	735	0		0		intergenic	0	19291	0	-1.13387	-0.173436	-0.686101	-0.0598833	-0.442513	-0.518068	-0.326411	0.893198	1.38722	0.203925	1.98959	2.04054	0.489929	-1.08025	-0.978656	-1.02628	-0.578932
1305	chr1-162625470-162626947	158	chr1-162625470-162626947	1478	0		0		intergenic	0	4425	0	-1.13387	-0.173436	-0.686101	-0.0598833	-0.442513	-0.518068	-0.326411	0.893198	1.38722	0.203925	1.98959	2.04054	0.489929	-1.08025	-0.978656	-1.02628	-0.578932
1306	chr1-162695902-162697070	158	chr1-162695902-162697070	1169	0	ENSG00000162733	1	DDR2	intron	0	63431	0	-1.13387	-0.173436	-0.686101	-0.0598833	-0.442513	-0.518068	-0.326411	0.893198	1.38722	0.203925	1.98959	2.04054	0.489929	-1.08025	-0.978656	-1.02628	-0.578932
1307	chr1-162709976-162711451	158	chr1-162709976-162711451	1476	0	ENSG00000162733	1	DDR2	intron	0	55785	0	-1.13387	-0.173436	-0.686101	-0.0598833	-0.442513	-0.518068	-0.326411	0.893198	1.38722	0.203925	1.98959	2.04054	0.489929	-1.08025	-0.978656	-1.02628	-0.578932
1308	chr1-162884643-162885626	158	chr1-162884643-162885626	984	0		0		intergenic	0	15827	0	-1.13387	-0.173436	-0.686101	-0.0598833	-0.442513	-0.518068	-0.326411	0.893198	1.38722	0.203925	1.98959	2.04054	0.489929	-1.08025	-0.978656	-1.02628	-0.578932
1309	chr1-16267576-16268320	171	chr1-16267576-16268320	745	0	ENSG00000037637	1	FBXO42	intron	0	13982	0	3.92908	-0.30347	0.0480567	-0.451875	-0.13481	-0.442428	-0.204849	-0.519073	-0.376493	-0.209263	-0.235978	-0.377845	-0.117941	0.250037	-0.130899	-0.355257	-0.366989
1310	chr1-16620625-16621547	171	chr1-16620625-16621547	923	0		0		intergenic	0	7062	0	3.92908	-0.30347	0.0480567	-0.451875	-0.13481	-0.442428	-0.204849	-0.519073	-0.376493	-0.209263	-0.235978	-0.377845	-0.117941	0.250037	-0.130899	-0.355257	-0.366989
1311	chr1-16630168-16631378	171	chr1-16630168-16631378	1211	0		0		intergenic	0	16605	0	3.92908	-0.30347	0.0480567	-0.451875	-0.13481	-0.442428	-0.204849	-0.519073	-0.376493	-0.209263	-0.235978	-0.377845	-0.117941	0.250037	-0.130899	-0.355257	-0.366989
1312	chr1-16677771-16678432	171	chr1-16677771-16678432	662	0		0		intergenic	0	4767	0	3.92908	-0.30347	0.0480567	-0.451875	-0.13481	-0.442428	-0.204849	-0.519073	-0.376493	-0.209263	-0.235978	-0.377845	-0.117941	0.250037	-0.130899	-0.355257	-0.366989
1313	chr1-16724788-16726022	171	chr1-16724788-16726022	1235	0		0		intergenic	0	8438	0	3.92908	-0.30347	0.0480567	-0.451875	-0.13481	-0.442428	-0.204849	-0.519073	-0.376493	-0.209263	-0.235978	-0.377845	-0.117941	0.250037	-0.130899	-0.355257	-0.366989
1314	chr1-16727111-16727994	171	chr1-16727111-16727994	884	0		0		intergenic	0	6466	0	3.92908	-0.30347	0.0480567	-0.451875	-0.13481	-0.442428	-0.204849	-0.519073	-0.376493	-0.209263	-0.235978	-0.377845	-0.117941	0.250037	-0.130899	-0.355257	-0.366989
1315	chr1-162821996-162823215	159	chr1-162821996-162823215	1220	0		0		intergenic	0	19077	0	-0.846164	0.533705	2.84121	-0.0485005	1.3033	1.546	-0.255119	0.155588	-0.250613	-0.560018	-0.634885	-0.312367	-0.607861	-1.13647	-0.631832	-0.870767	-0.225208
1316	chr1-162889566-162890626	159	chr1-162889566-162890626	1061	0		0		intergenic	0	20750	0	-0.846164	0.533705	2.84121	-0.0485005	1.3033	1.546	-0.255119	0.155588	-0.250613	-0.560018	-0.634885	-0.312367	-0.607861	-1.13647	-0.631832	-0.870767	-0.225208
1317	chr1-162917766-162919159	159	chr1-162917766-162919159	1394	0		0		intergenic	0	48950	0	-0.846164	0.533705	2.84121	-0.0485005	1.3033	1.546	-0.255119	0.155588	-0.250613	-0.560018	-0.634885	-0.312367	-0.607861	-1.13647	-0.631832	-0.870767	-0.225208
1318	chr1-162956233-162957410	159	chr1-162956233-162957410	1178	0		0		intergenic	0	87417	0	-0.846164	0.533705	2.84121	-0.0485005	1.3033	1.546	-0.255119	0.155588	-0.250613	-0.560018	-0.634885	-0.312367	-0.607861	-1.13647	-0.631832	-0.870767	-0.225208
1319	chr1-162977775-162978861	159	chr1-162977775-162978861	1087	0		0		intergenic	0	89913	0	-0.846164	0.533705	2.84121	-0.0485005	1.3033	1.546	-0.255119	0.155588	-0.250613	-0.560018	-0.634885	-0.312367	-0.607861	-1.13647	-0.631832	-0.870767	-0.225208
1320	chr1-163028735-163030106	159	chr1-163028735-163030106	1372	0		0		intergenic	0	38668	0	-0.846164	0.533705	2.84121	-0.0485005	1.3033	1.546	-0.255119	0.155588	-0.250613	-0.560018	-0.634885	-0.312367	-0.607861	-1.13647	-0.631832	-0.870767	-0.225208
1321	chr1-163068556-163069680	159	chr1-163068556-163069680	1125	1	ENSG00000117152	1	RGS4	exon	1	0	0	-0.846164	0.533705	2.84121	-0.0485005	1.3033	1.546	-0.255119	0.155588	-0.250613	-0.560018	-0.634885	-0.312367	-0.607861	-1.13647	-0.631832	-0.870767	-0.225208
1322	chr1-163071602-163072138	159	chr1-163071602-163072138	537	1	ENSG00000117152	1	RGS4	exon	1	0	0	-0.846164	0.533705	2.84121	-0.0485005	1.3033	1.546	-0.255119	0.155588	-0.250613	-0.560018	-0.634885	-0.312367	-0.607861	-1.13647	-0.631832	-0.870767	-0.225208
1323	chr1-163195824-163196929	159	chr1-163195824-163196929	1106	0	ENSG00000143248	1	RGS5	intron	0	5905	0	-0.846164	0.533705	2.84121	-0.0485005	1.3033	1.546	-0.255119	0.155588	-0.250613	-0.560018	-0.634885	-0.312367	-0.607861	-1.13647	-0.631832	-0.870767	-0.225208
1324	chr1-163296873-163297635	159	chr1-163296873-163297635	763	0	ENSG00000143228	1	NUF2	intron	0	24099	0	-0.846164	0.533705	2.84121	-0.0485005	1.3033	1.546	-0.255119	0.155588	-0.250613	-0.560018	-0.634885	-0.312367	-0.607861	-1.13647	-0.631832	-0.870767	-0.225208
1325	chr1-163105969-163107052	163	chr1-163105969-163107052	1084	0		0		intergenic	0	33822	0	-0.560683	0.0390302	-0.634276	-0.728628	-0.716476	-0.7862	-0.632916	-0.379272	0.655275	-0.176717	1.86117	2.05018	2.1618	-0.657302	-0.615957	-0.63449	-0.244542
1326	chr1-163243828-163244739	163	chr1-163243828-163244739	912	0	ENSG00000143248	1	RGS5	intron	0	21836	0	-0.560683	0.0390302	-0.634276	-0.728628	-0.716476	-0.7862	-0.632916	-0.379272	0.655275	-0.176717	1.86117	2.05018	2.1618	-0.657302	-0.615957	-0.63449	-0.244542
1327	chr1-163406442-163407201	163	chr1-163406442-163407201	760	0		0		intergenic	0	66186	0	-0.560683	0.0390302	-0.634276	-0.728628	-0.716476	-0.7862	-0.632916	-0.379272	0.655275	-0.176717	1.86117	2.05018	2.1618	-0.657302	-0.615957	-0.63449	-0.244542
1328	chr1-163421161-163422224	163	chr1-163421161-163422224	1064	0		0		intergenic	0	80905	0	-0.560683	0.0390302	-0.634276	-0.728628	-0.716476	-0.7862	-0.632916	-0.379272	0.655275	-0.176717	1.86117	2.05018	2.1618	-0.657302	-0.615957	-0.63449	-0.244542
1329	chr1-163432832-163434182	163	chr1-163432832-163434182	1351	0		0		intergenic	0	92576	0	-0.560683	0.0390302	-0.634276	-0.728628	-0.716476	-0.7862	-0.632916	-0.379272	0.655275	-0.176717	1.86117	2.05018	2.1618	-0.657302	-0.615957	-0.63449	-0.244542
1330	chr1-163436013-163436668	163	chr1-163436013-163436668	656	0		0		intergenic	0	95757	0	-0.560683	0.0390302	-0.634276	-0.728628	-0.716476	-0.7862	-0.632916	-0.379272	0.655275	-0.176717	1.86117	2.05018	2.1618	-0.657302	-0.615957	-0.63449	-0.244542
1331	chr1-163439351-163440525	163	chr1-163439351-163440525	1175	0		0		intergenic	0	99095	0	-0.560683	0.0390302	-0.634276	-0.728628	-0.716476	-0.7862	-0.632916	-0.379272	0.655275	-0.176717	1.86117	2.05018	2.1618	-0.657302	-0.615957	-0.63449	-0.244542
1332	chr1-163501162-163502321	163	chr1-163501162-163502321	1160	0		0		intergenic	0	160906	0	-0.560683	0.0390302	-0.634276	-0.728628	-0.716476	-0.7862	-0.632916	-0.379272	0.655275	-0.176717	1.86117	2.05018	2.1618	-0.657302	-0.615957	-0.63449	-0.244542
1333	chr1-163655577-163656776	163	chr1-163655577-163656776	1200	0		0		intergenic	0	315321	0	-0.560683	0.0390302	-0.634276	-0.728628	-0.716476	-0.7862	-0.632916	-0.379272	0.655275	-0.176717	1.86117	2.05018	2.1618	-0.657302	-0.615957	-0.63449	-0.244542
1334	chr1-163664471-163665744	163	chr1-163664471-163665744	1274	0		0		intergenic	0	324215	0	-0.560683	0.0390302	-0.634276	-0.728628	-0.716476	-0.7862	-0.632916	-0.379272	0.655275	-0.176717	1.86117	2.05018	2.1618	-0.657302	-0.615957	-0.63449	-0.244542
1335	chr1-163729962-163731008	163	chr1-163729962-163731008	1047	0		0		intergenic	0	389706	0	-0.560683	0.0390302	-0.634276	-0.728628	-0.716476	-0.7862	-0.632916	-0.379272	0.655275	-0.176717	1.86117	2.05018	2.1618	-0.657302	-0.615957	-0.63449	-0.244542
1336	chr1-163835974-163836926	163	chr1-163835974-163836926	953	0		0		intergenic	0	495718	0	-0.560683	0.0390302	-0.634276	-0.728628	-0.716476	-0.7862	-0.632916	-0.379272	0.655275	-0.176717	1.86117	2.05018	2.1618	-0.657302	-0.615957	-0.63449	-0.244542
1337	chr1-163842317-163843282	163	chr1-163842317-163843282	966	0		0		intergenic	0	502061	0	-0.560683	0.0390302	-0.634276	-0.728628	-0.716476	-0.7862	-0.632916	-0.379272	0.655275	-0.176717	1.86117	2.05018	2.1618	-0.657302	-0.615957	-0.63449	-0.244542
1338	chr1-163856881-163857602	163	chr1-163856881-163857602	722	0		0		intergenic	0	516625	0	-0.560683	0.0390302	-0.634276	-0.728628	-0.716476	-0.7862	-0.632916	-0.379272	0.655275	-0.176717	1.86117	2.05018	2.1618	-0.657302	-0.615957	-0.63449	-0.244542
1339	chr1-163863773-163864994	163	chr1-163863773-163864994	1222	0		0		intergenic	0	523517	0	-0.560683	0.0390302	-0.634276	-0.728628	-0.716476	-0.7862	-0.632916	-0.379272	0.655275	-0.176717	1.86117	2.05018	2.1618	-0.657302	-0.615957	-0.63449	-0.244542
1340	chr1-163866341-163866881	163	chr1-163866341-163866881	541	0		0		intergenic	0	526085	0	-0.560683	0.0390302	-0.634276	-0.728628	-0.716476	-0.7862	-0.632916	-0.379272	0.655275	-0.176717	1.86117	2.05018	2.1618	-0.657302	-0.615957	-0.63449	-0.244542
1341	chr1-163871934-163872452	163	chr1-163871934-163872452	519	0		0		intergenic	0	531678	0	-0.560683	0.0390302	-0.634276	-0.728628	-0.716476	-0.7862	-0.632916	-0.379272	0.655275	-0.176717	1.86117	2.05018	2.1618	-0.657302	-0.615957	-0.63449	-0.244542
1342	chr1-163875226-163876240	163	chr1-163875226-163876240	1015	0		0		intergenic	0	534970	0	-0.560683	0.0390302	-0.634276	-0.728628	-0.716476	-0.7862	-0.632916	-0.379272	0.655275	-0.176717	1.86117	2.05018	2.1618	-0.657302	-0.615957	-0.63449	-0.244542
1343	chr1-163932081-163933231	163	chr1-163932081-163933231	1151	0		0		intergenic	0	591825	0	-0.560683	0.0390302	-0.634276	-0.728628	-0.716476	-0.7862	-0.632916	-0.379272	0.655275	-0.176717	1.86117	2.05018	2.1618	-0.657302	-0.615957	-0.63449	-0.244542
1344	chr1-164295664-164296799	165	chr1-164295664-164296799	1136	0		0		intergenic	0	258784	0	-0.804765	1.20945	0.372287	-0.643079	-0.288027	-0.445688	-0.689802	0.18567	-0.0923741	0.0259664	0.85405	2.81007	1.10656	-1.2641	-1.20168	-0.580566	-0.55398
1345	chr1-164608563-164609301	165	chr1-164608563-164609301	739	0	ENSG00000185630	1	PBX1	intron	0	3369	0	-0.804765	1.20945	0.372287	-0.643079	-0.288027	-0.445688	-0.689802	0.18567	-0.0923741	0.0259664	0.85405	2.81007	1.10656	-1.2641	-1.20168	-0.580566	-0.55398
1346	chr1-164622393-164622792	165	chr1-164622393-164622792	400	0	ENSG00000185630	1	PBX1	intron	0	3213	0	-0.804765	1.20945	0.372287	-0.643079	-0.288027	-0.445688	-0.689802	0.18567	-0.0923741	0.0259664	0.85405	2.81007	1.10656	-1.2641	-1.20168	-0.580566	-0.55398
1347	chr1-164624987-164626014	165	chr1-164624987-164626014	1028	1	ENSG00000185630	1	PBX1	exon	1	0	0	-0.804765	1.20945	0.372287	-0.643079	-0.288027	-0.445688	-0.689802	0.18567	-0.0923741	0.0259664	0.85405	2.81007	1.10656	-1.2641	-1.20168	-0.580566	-0.55398
1348	chr1-164626620-164627204	165	chr1-164626620-164627204	585	0	ENSG00000185630	1	PBX1	intron	0	583	0	-0.804765	1.20945	0.372287	-0.643079	-0.288027	-0.445688	-0.689802	0.18567	-0.0923741	0.0259664	0.85405	2.81007	1.10656	-1.2641	-1.20168	-0.580566	-0.55398
1349	chr1-164643998-164645451	165	chr1-164643998-164645451	1454	0	ENSG00000185630	1	PBX1	intron	0	6444	0	-0.804765	1.20945	0.372287	-0.643079	-0.288027	-0.445688	-0.689802	0.18567	-0.0923741	0.0259664	0.85405	2.81007	1.10656	-1.2641	-1.20168	-0.580566	-0.55398
1350	chr1-164703489-164704483	165	chr1-164703489-164704483	995	0	ENSG00000185630	1	PBX1	intron	0	51592	0	-0.804765	1.20945	0.372287	-0.643079	-0.288027	-0.445688	-0.689802	0.18567	-0.0923741	0.0259664	0.85405	2.81007	1.10656	-1.2641	-1.20168	-0.580566	-0.55398
1351	chr1-164706763-164707693	165	chr1-164706763-164707693	931	0	ENSG00000185630	1	PBX1	intron	0	54866	0	-0.804765	1.20945	0.372287	-0.643079	-0.288027	-0.445688	-0.689802	0.18567	-0.0923741	0.0259664	0.85405	2.81007	1.10656	-1.2641	-1.20168	-0.580566	-0.55398
1352	chr1-164707787-164708030	165	chr1-164707787-164708030	244	0	ENSG00000185630	1	PBX1	intron	0	55890	0	-0.804765	1.20945	0.372287	-0.643079	-0.288027	-0.445688	-0.689802	0.18567	-0.0923741	0.0259664	0.85405	2.81007	1.10656	-1.2641	-1.20168	-0.580566	-0.55398
1353	chr1-164747996-164748945	165	chr1-164747996-164748945	950	0	ENSG00000185630	1	PBX1	intron	0	23966	0	-0.804765	1.20945	0.372287	-0.643079	-0.288027	-0.445688	-0.689802	0.18567	-0.0923741	0.0259664	0.85405	2.81007	1.10656	-1.2641	-1.20168	-0.580566	-0.55398
1354	chr1-164753627-164754654	165	chr1-164753627-164754654	1028	0	ENSG00000185630	1	PBX1	intron	0	18257	0	-0.804765	1.20945	0.372287	-0.643079	-0.288027	-0.445688	-0.689802	0.18567	-0.0923741	0.0259664	0.85405	2.81007	1.10656	-1.2641	-1.20168	-0.580566	-0.55398
1355	chr1-164766085-164766576	165	chr1-164766085-164766576	492	0	ENSG00000185630	1	PBX1	intron	0	6335	0	-0.804765	1.20945	0.372287	-0.643079	-0.288027	-0.445688	-0.689802	0.18567	-0.0923741	0.0259664	0.85405	2.81007	1.10656	-1.2641	-1.20168	-0.580566	-0.55398
1356	chr1-164767224-164768363	165	chr1-164767224-164768363	1140	0	ENSG00000185630	1	PBX1	intron	0	4548	0	-0.804765	1.20945	0.372287	-0.643079	-0.288027	-0.445688	-0.689802	0.18567	-0.0923741	0.0259664	0.85405	2.81007	1.10656	-1.2641	-1.20168	-0.580566	-0.55398
1357	chr1-164770926-164772240	165	chr1-164770926-164772240	1315	0	ENSG00000185630	1	PBX1	promoter	1	671	0	-0.804765	1.20945	0.372287	-0.643079	-0.288027	-0.445688	-0.689802	0.18567	-0.0923741	0.0259664	0.85405	2.81007	1.10656	-1.2641	-1.20168	-0.580566	-0.55398
1358	chr1-164780078-164780726	165	chr1-164780078-164780726	649	0	ENSG00000185630	1	PBX1	intron	0	6916	0	-0.804765	1.20945	0.372287	-0.643079	-0.288027	-0.445688	-0.689802	0.18567	-0.0923741	0.0259664	0.85405	2.81007	1.10656	-1.2641	-1.20168	-0.580566	-0.55398
1359	chr1-164780841-164782254	165	chr1-164780841-164782254	1414	0	ENSG00000185630	1	PBX1	intron	0	5388	0	-0.804765	1.20945	0.372287	-0.643079	-0.288027	-0.445688	-0.689802	0.18567	-0.0923741	0.0259664	0.85405	2.81007	1.10656	-1.2641	-1.20168	-0.580566	-0.55398
1360	chr1-164786670-164787862	165	chr1-164786670-164787862	1193	1	ENSG00000185630	1	PBX1	exon	1	0	0	-0.804765	1.20945	0.372287	-0.643079	-0.288027	-0.445688	-0.689802	0.18567	-0.0923741	0.0259664	0.85405	2.81007	1.10656	-1.2641	-1.20168	-0.580566	-0.55398
1361	chr1-164823392-164824426	165	chr1-164823392-164824426	1035	0	ENSG00000185630	1	PBX1	intron	0	10663	0	-0.804765	1.20945	0.372287	-0.643079	-0.288027	-0.445688	-0.689802	0.18567	-0.0923741	0.0259664	0.85405	2.81007	1.10656	-1.2641	-1.20168	-0.580566	-0.55398
1362	chr1-165052998-165053766	165	chr1-165052998-165053766	769	0		0		intergenic	0	159513	0	-0.804765	1.20945	0.372287	-0.643079	-0.288027	-0.445688	-0.689802	0.18567	-0.0923741	0.0259664	0.85405	2.81007	1.10656	-1.2641	-1.20168	-0.580566	-0.55398
1363	chr1-165056737-165057255	165	chr1-165056737-165057255	519	0		0		intergenic	0	156024	0	-0.804765	1.20945	0.372287	-0.643079	-0.288027	-0.445688	-0.689802	0.18567	-0.0923741	0.0259664	0.85405	2.81007	1.10656	-1.2641	-1.20168	-0.580566	-0.55398
1364	chr1-164591788-164592186	164	chr1-164591788-164592186	399	0	ENSG00000185630	1	PBX1	intron	0	1437	0	0.267283	0.633618	0.0741304	-0.106506	-0.222945	-0.0332671	0.0827968	-0.695748	-0.655806	-0.533148	-0.436333	-0.334868	-0.232882	-0.64545	-0.619366	3.74377	-0.285281
1365	chr1-164611562-164612480	164	chr1-164611562-164612480	919	0	ENSG00000185630	1	PBX1	intron	0	6368	0	0.267283	0.633618	0.0741304	-0.106506	-0.222945	-0.0332671	0.0827968	-0.695748	-0.655806	-0.533148	-0.436333	-0.334868	-0.232882	-0.64545	-0.619366	3.74377	-0.285281
1366	chr1-164613155-164613644	164	chr1-164613155-164613644	490	0	ENSG00000185630	1	PBX1	intron	0	7961	0	0.267283	0.633618	0.0741304	-0.106506	-0.222945	-0.0332671	0.0827968	-0.695748	-0.655806	-0.533148	-0.436333	-0.334868	-0.232882	-0.64545	-0.619366	3.74377	-0.285281
1367	chr1-164759868-164760479	166	chr1-164759868-164760479	612	0	ENSG00000185630	1	PBX1	intron	0	12432	0	-0.345171	-0.263826	-0.370434	-0.287192	-0.302352	0.130803	-0.360428	-0.379512	-0.350507	-0.169587	-0.271375	-0.212292	-0.123128	-0.25486	-0.0360619	-0.369065	3.96499
1368	chr1-164801104-164802516	166	chr1-164801104-164802516	1413	0	ENSG00000185630	1	PBX1	intron	0	8611	0	-0.345171	-0.263826	-0.370434	-0.287192	-0.302352	0.130803	-0.360428	-0.379512	-0.350507	-0.169587	-0.271375	-0.212292	-0.123128	-0.25486	-0.0360619	-0.369065	3.96499
1369	chr1-164813467-164814122	166	chr1-164813467-164814122	656	1	ENSG00000185630	1	PBX1	exon	0	738	0	-0.345171	-0.263826	-0.370434	-0.287192	-0.302352	0.130803	-0.360428	-0.379512	-0.350507	-0.169587	-0.271375	-0.212292	-0.123128	-0.25486	-0.0360619	-0.369065	3.96499
1370	chr1-165606308-165607040	169	chr1-165606308-165607040	733	0		0		intergenic	0	23820	0	-0.622765	1.2491	1.89076	0.726644	1.91824	1.18496	0.322609	-0.674069	-0.801328	-0.88792	-0.84346	-0.739356	-0.734892	-0.700003	-0.890995	0.399197	-0.796733
1371	chr1-165628448-165628927	169	chr1-165628448-165628927	480	0	ENSG00000143198	0	MGST3	promoter	1	1933	0	-0.622765	1.2491	1.89076	0.726644	1.91824	1.18496	0.322609	-0.674069	-0.801328	-0.88792	-0.84346	-0.739356	-0.734892	-0.700003	-0.890995	0.399197	-0.796733
1372	chr1-165890206-165891129	169	chr1-165890206-165891129	924	1	ENSG00000143179	1	UCK2	exon	1	1522	0	-0.622765	1.2491	1.89076	0.726644	1.91824	1.18496	0.322609	-0.674069	-0.801328	-0.88792	-0.84346	-0.739356	-0.734892	-0.700003	-0.890995	0.399197	-0.796733
1373	chr1-16623467-16624504	179	chr1-16623467-16624504	1038	0		0		intergenic	0	9904	0	0.699518	-0.181914	-0.382769	-0.363819	-0.296888	-0.386568	-0.00975134	-0.406808	-0.39125	-0.350511	-0.377887	-0.351562	-0.166433	-0.300846	-0.310675	3.86716	-0.289001
1374	chr1-16720278-16721070	179	chr1-16720278-16721070	793	0		0		intergenic	0	13390	0	0.699518	-0.181914	-0.382769	-0.363819	-0.296888	-0.386568	-0.00975134	-0.406808	-0.39125	-0.350511	-0.377887	-0.351562	-0.166433	-0.300846	-0.310675	3.86716	-0.289001
1375	chr1-16947976-16948835	179	chr1-16947976-16948835	860	1	ENSG00000058453	1	CROCC	exon	1	0	0	0.699518	-0.181914	-0.382769	-0.363819	-0.296888	-0.386568	-0.00975134	-0.406808	-0.39125	-0.350511	-0.377887	-0.351562	-0.166433	-0.300846	-0.310675	3.86716	-0.289001
1376	chr1-166912539-166913033	172	chr1-166912539-166913033	495	1	ENSG00000143195	1	ILDR2	exon	0	4458	0	-0.437531	-0.074235	1.6094	0.642844	2.17642	1.99182	0.489231	-0.670289	-0.800999	-0.823679	-0.944024	-0.864707	-0.648336	-0.70912	-0.574419	-0.435271	0.072899
1377	chr1-166947058-166948206	172	chr1-166947058-166948206	1149	0	ENSG00000143195	1	ILDR2	intron	0	27117	0	-0.437531	-0.074235	1.6094	0.642844	2.17642	1.99182	0.489231	-0.670289	-0.800999	-0.823679	-0.944024	-0.864707	-0.648336	-0.70912	-0.574419	-0.435271	0.072899
1378	chr1-166972656-166973885	172	chr1-166972656-166973885	1230	0	ENSG00000143194	1	MAEL	promoter	1	1438	0	-0.437531	-0.074235	1.6094	0.642844	2.17642	1.99182	0.489231	-0.670289	-0.800999	-0.823679	-0.944024	-0.864707	-0.648336	-0.70912	-0.574419	-0.435271	0.072899
1379	chr1-167056832-167057583	172	chr1-167056832-167057583	752	0	ENSG00000143167	1	GPA33	intron	0	21135	0	-0.437531	-0.074235	1.6094	0.642844	2.17642	1.99182	0.489231	-0.670289	-0.800999	-0.823679	-0.944024	-0.864707	-0.648336	-0.70912	-0.574419	-0.435271	0.072899
1380	chr1-167117928-167118658	172	chr1-167117928-167118658	731	0	ENSG00000198842	1	DUSP27	intron	0	7260	0	-0.437531	-0.074235	1.6094	0.642844	2.17642	1.99182	0.489231	-0.670289	-0.800999	-0.823679	-0.944024	-0.864707	-0.648336	-0.70912	-0.574419	-0.435271	0.072899
1381	chr1-167121234-167122273	172	chr1-167121234-167122273	1040	0	ENSG00000198842	1	DUSP27	intron	0	3645	0	-0.437531	-0.074235	1.6094	0.642844	2.17642	1.99182	0.489231	-0.670289	-0.800999	-0.823679	-0.944024	-0.864707	-0.648336	-0.70912	-0.574419	-0.435271	0.072899
1382	chr1-167370833-167371382	172	chr1-167370833-167371382	550	0	ENSG00000143190	1	POU2F1	promoter	1	597	0	-0.437531	-0.074235	1.6094	0.642844	2.17642	1.99182	0.489231	-0.670289	-0.800999	-0.823679	-0.944024	-0.864707	-0.648336	-0.70912	-0.574419	-0.435271	0.072899
1383	chr1-167375785-167376742	172	chr1-167375785-167376742	958	1	ENSG00000143190	1	POU2F1	exon	0	3804	0	-0.437531	-0.074235	1.6094	0.642844	2.17642	1.99182	0.489231	-0.670289	-0.800999	-0.823679	-0.944024	-0.864707	-0.648336	-0.70912	-0.574419	-0.435271	0.072899
1384	chr1-167412730-167413518	172	chr1-167412730-167413518	789	1	ENSG00000143190	1	POU2F1	exon	0	20547	0	-0.437531	-0.074235	1.6094	0.642844	2.17642	1.99182	0.489231	-0.670289	-0.800999	-0.823679	-0.944024	-0.864707	-0.648336	-0.70912	-0.574419	-0.435271	0.072899
1385	chr1-167442003-167442529	172	chr1-167442003-167442529	527	0	ENSG00000198821	1	CD247	intron	0	2362	0	-0.437531	-0.074235	1.6094	0.642844	2.17642	1.99182	0.489231	-0.670289	-0.800999	-0.823679	-0.944024	-0.864707	-0.648336	-0.70912	-0.574419	-0.435271	0.072899
1386	chr1-167467040-167467825	172	chr1-167467040-167467825	786	0	ENSG00000198821	1	CD247	intron	0	27399	0	-0.437531	-0.074235	1.6094	0.642844	2.17642	1.99182	0.489231	-0.670289	-0.800999	-0.823679	-0.944024	-0.864707	-0.648336	-0.70912	-0.574419	-0.435271	0.072899
1387	chr1-167494565-167495884	172	chr1-167494565-167495884	1320	0	ENSG00000198821	1	CD247	intron	0	22644	0	-0.437531	-0.074235	1.6094	0.642844	2.17642	1.99182	0.489231	-0.670289	-0.800999	-0.823679	-0.944024	-0.864707	-0.648336	-0.70912	-0.574419	-0.435271	0.072899
1388	chr1-167543411-167544329	172	chr1-167543411-167544329	919	0	ENSG00000143162	1	CREG1	intron	0	1850	0	-0.437531	-0.074235	1.6094	0.642844	2.17642	1.99182	0.489231	-0.670289	-0.800999	-0.823679	-0.944024	-0.864707	-0.648336	-0.70912	-0.574419	-0.435271	0.072899
1389	chr1-167563317-167564279	173	chr1-167563317-167564279	963	0		0		intergenic	0	9549	0	-0.0240105	-0.542502	-0.651271	-0.565628	-0.621437	-0.688549	-0.334865	-0.568748	-0.513542	1.80456	-0.421323	-0.352314	-0.303856	2.53476	2.00858	-0.341734	-0.418121
1390	chr1-167601336-167602357	173	chr1-167601336-167602357	1022	0		0		intergenic	0	27735	0	-0.0240105	-0.542502	-0.651271	-0.565628	-0.621437	-0.688549	-0.334865	-0.568748	-0.513542	1.80456	-0.421323	-0.352314	-0.303856	2.53476	2.00858	-0.341734	-0.418121
1391	chr1-167616979-167618156	173	chr1-167616979-167618156	1178	0		0		intergenic	0	11936	0	-0.0240105	-0.542502	-0.651271	-0.565628	-0.621437	-0.688549	-0.334865	-0.568748	-0.513542	1.80456	-0.421323	-0.352314	-0.303856	2.53476	2.00858	-0.341734	-0.418121
1392	chr1-167627594-167628358	173	chr1-167627594-167628358	765	0	ENSG00000198771	0	RCSD1	promoter	1	1734	0	-0.0240105	-0.542502	-0.651271	-0.565628	-0.621437	-0.688549	-0.334865	-0.568748	-0.513542	1.80456	-0.421323	-0.352314	-0.303856	2.53476	2.00858	-0.341734	-0.418121
1393	chr1-167629161-167629563	173	chr1-167629161-167629563	403	0	ENSG00000198771	0	RCSD1	promoter	1	529	0	-0.0240105	-0.542502	-0.651271	-0.565628	-0.621437	-0.688549	-0.334865	-0.568748	-0.513542	1.80456	-0.421323	-0.352314	-0.303856	2.53476	2.00858	-0.341734	-0.418121
1394	chr1-167629764-167630643	173	chr1-167629764-167630643	880	1	ENSG00000198771	1	RCSD1	exon	1	0	0	-0.0240105	-0.542502	-0.651271	-0.565628	-0.621437	-0.688549	-0.334865	-0.568748	-0.513542	1.80456	-0.421323	-0.352314	-0.303856	2.53476	2.00858	-0.341734	-0.418121
1395	chr1-167630727-167630941	173	chr1-167630727-167630941	215	0	ENSG00000198771	1	RCSD1	intron	0	460	0	-0.0240105	-0.542502	-0.651271	-0.565628	-0.621437	-0.688549	-0.334865	-0.568748	-0.513542	1.80456	-0.421323	-0.352314	-0.303856	2.53476	2.00858	-0.341734	-0.418121
1396	chr1-167644535-167645578	173	chr1-167644535-167645578	1044	0	ENSG00000198771	1	RCSD1	intron	0	14268	0	-0.0240105	-0.542502	-0.651271	-0.565628	-0.621437	-0.688549	-0.334865	-0.568748	-0.513542	1.80456	-0.421323	-0.352314	-0.303856	2.53476	2.00858	-0.341734	-0.418121
1397	chr1-167654752-167655785	173	chr1-167654752-167655785	1034	0	ENSG00000198771	1	RCSD1	intron	0	24485	0	-0.0240105	-0.542502	-0.651271	-0.565628	-0.621437	-0.688549	-0.334865	-0.568748	-0.513542	1.80456	-0.421323	-0.352314	-0.303856	2.53476	2.00858	-0.341734	-0.418121
1398	chr1-167661564-167662838	173	chr1-167661564-167662838	1275	0	ENSG00000198771	1	RCSD1	intron	0	31297	0	-0.0240105	-0.542502	-0.651271	-0.565628	-0.621437	-0.688549	-0.334865	-0.568748	-0.513542	1.80456	-0.421323	-0.352314	-0.303856	2.53476	2.00858	-0.341734	-0.418121
1399	chr1-167662934-167663495	173	chr1-167662934-167663495	562	0	ENSG00000198771	1	RCSD1	intron	0	32667	0	-0.0240105	-0.542502	-0.651271	-0.565628	-0.621437	-0.688549	-0.334865	-0.568748	-0.513542	1.80456	-0.421323	-0.352314	-0.303856	2.53476	2.00858	-0.341734	-0.418121
1400	chr1-167666327-167666801	173	chr1-167666327-167666801	475	0	ENSG00000198771	1	RCSD1	intron	0	36060	0	-0.0240105	-0.542502	-0.651271	-0.565628	-0.621437	-0.688549	-0.334865	-0.568748	-0.513542	1.80456	-0.421323	-0.352314	-0.303856	2.53476	2.00858	-0.341734	-0.418121
1401	chr1-167697216-167698233	173	chr1-167697216-167698233	1018	1	ENSG00000198771	1	RCSD1	exon	0	22958	0	-0.0240105	-0.542502	-0.651271	-0.565628	-0.621437	-0.688549	-0.334865	-0.568748	-0.513542	1.80456	-0.421323	-0.352314	-0.303856	2.53476	2.00858	-0.341734	-0.418121
1402	chr1-167795551-167796209	173	chr1-167795551-167796209	659	0		0		intergenic	0	8483	0	-0.0240105	-0.542502	-0.651271	-0.565628	-0.621437	-0.688549	-0.334865	-0.568748	-0.513542	1.80456	-0.421323	-0.352314	-0.303856	2.53476	2.00858	-0.341734	-0.418121
1403	chr1-167803120-167803789	173	chr1-167803120-167803789	670	0		0		intergenic	0	16052	0	-0.0240105	-0.542502	-0.651271	-0.565628	-0.621437	-0.688549	-0.334865	-0.568748	-0.513542	1.80456	-0.421323	-0.352314	-0.303856	2.53476	2.00858	-0.341734	-0.418121
1404	chr1-167926459-167926884	174	chr1-167926459-167926884	426	0	ENSG00000143158	1	MPC2	intron	0	8898	0	3.9978	-0.287283	-0.231504	-0.283739	-0.197729	-0.23258	-0.285862	-0.27344	-0.277902	-0.278649	-0.251148	-0.272437	-0.251825	-0.209721	-0.17324	-0.270993	-0.219746
1405	chr1-168170657-168171461	174	chr1-168170657-168171461	805	0		0		intergenic	0	7471	0	3.9978	-0.287283	-0.231504	-0.283739	-0.197729	-0.23258	-0.285862	-0.27344	-0.277902	-0.278649	-0.251148	-0.272437	-0.251825	-0.209721	-0.17324	-0.270993	-0.219746
1406	chr1-168202899-168203582	174	chr1-168202899-168203582	684	0		0		intergenic	0	22355	0	3.9978	-0.287283	-0.231504	-0.283739	-0.197729	-0.23258	-0.285862	-0.27344	-0.277902	-0.278649	-0.251148	-0.272437	-0.251825	-0.209721	-0.17324	-0.270993	-0.219746
1407	chr1-168121104-168122162	175	chr1-168121104-168122162	1059	0	ENSG00000143147	1	GPR161	intron	0	12874	0	-0.33253	-0.0746468	-0.4621	-0.485003	-0.539293	-0.57057	-0.259531	-0.366432	-0.148624	3.82791	0.256663	-0.0501077	-0.171764	-0.545446	-0.538392	-0.044904	0.504769
1408	chr1-168427942-168428764	175	chr1-168427942-168428764	823	0		0		intergenic	0	115232	0	-0.33253	-0.0746468	-0.4621	-0.485003	-0.539293	-0.57057	-0.259531	-0.366432	-0.148624	3.82791	0.256663	-0.0501077	-0.171764	-0.545446	-0.538392	-0.044904	0.504769
1409	chr1-168430105-168430613	175	chr1-168430105-168430613	509	0		0		intergenic	0	113383	0	-0.33253	-0.0746468	-0.4621	-0.485003	-0.539293	-0.57057	-0.259531	-0.366432	-0.148624	3.82791	0.256663	-0.0501077	-0.171764	-0.545446	-0.538392	-0.044904	0.504769
1410	chr1-168612982-168614330	175	chr1-168612982-168614330	1349	0		0		intergenic	0	36508	0	-0.33253	-0.0746468	-0.4621	-0.485003	-0.539293	-0.57057	-0.259531	-0.366432	-0.148624	3.82791	0.256663	-0.0501077	-0.171764	-0.545446	-0.538392	-0.044904	0.504769
1411	chr1-168320399-168321418	176	chr1-168320399-168321418	1020	0		0		intergenic	0	12381	0	-0.81147	-0.316795	-0.722988	-0.385725	-0.550712	-0.661753	-0.167747	0.352999	0.917943	-0.127616	1.24397	2.96663	1.11893	-0.924225	-0.925184	-0.507298	-0.498951
1412	chr1-168398382-168399441	176	chr1-168398382-168399441	1060	0		0		intergenic	0	90364	0	-0.81147	-0.316795	-0.722988	-0.385725	-0.550712	-0.661753	-0.167747	0.352999	0.917943	-0.127616	1.24397	2.96663	1.11893	-0.924225	-0.925184	-0.507298	-0.498951
1413	chr1-168483029-168484048	176	chr1-168483029-168484048	1020	0		0		intergenic	0	59948	0	-0.81147	-0.316795	-0.722988	-0.385725	-0.550712	-0.661753	-0.167747	0.352999	0.917943	-0.127616	1.24397	2.96663	1.11893	-0.924225	-0.925184	-0.507298	-0.498951
1414	chr1-168497888-168498743	176	chr1-168497888-168498743	856	0		0		intergenic	0	45253	0	-0.81147	-0.316795	-0.722988	-0.385725	-0.550712	-0.661753	-0.167747	0.352999	0.917943	-0.127616	1.24397	2.96663	1.11893	-0.924225	-0.925184	-0.507298	-0.498951
1415	chr1-168594282-168595153	176	chr1-168594282-168595153	872	0		0		intergenic	0	17808	0	-0.81147	-0.316795	-0.722988	-0.385725	-0.550712	-0.661753	-0.167747	0.352999	0.917943	-0.127616	1.24397	2.96663	1.11893	-0.924225	-0.925184	-0.507298	-0.498951
1416	chr1-168609002-168610308	176	chr1-168609002-168610308	1307	0		0		intergenic	0	32528	0	-0.81147	-0.316795	-0.722988	-0.385725	-0.550712	-0.661753	-0.167747	0.352999	0.917943	-0.127616	1.24397	2.96663	1.11893	-0.924225	-0.925184	-0.507298	-0.498951
1417	chr1-168688321-168689422	176	chr1-168688321-168689422	1102	0		0		intergenic	0	39841	0	-0.81147	-0.316795	-0.722988	-0.385725	-0.550712	-0.661753	-0.167747	0.352999	0.917943	-0.127616	1.24397	2.96663	1.11893	-0.924225	-0.925184	-0.507298	-0.498951
1418	chr1-168708913-168709955	176	chr1-168708913-168709955	1043	0	ENSG00000143196	1	DPT	intron	0	19308	0	-0.81147	-0.316795	-0.722988	-0.385725	-0.550712	-0.661753	-0.167747	0.352999	0.917943	-0.127616	1.24397	2.96663	1.11893	-0.924225	-0.925184	-0.507298	-0.498951
1419	chr1-168725619-168726920	176	chr1-168725619-168726920	1302	0	ENSG00000143196	1	DPT	intron	0	2343	0	-0.81147	-0.316795	-0.722988	-0.385725	-0.550712	-0.661753	-0.167747	0.352999	0.917943	-0.127616	1.24397	2.96663	1.11893	-0.924225	-0.925184	-0.507298	-0.498951
1420	chr1-168728608-168729486	176	chr1-168728608-168729486	879	1	ENSG00000143196	1	DPT	exon	1	0	0	-0.81147	-0.316795	-0.722988	-0.385725	-0.550712	-0.661753	-0.167747	0.352999	0.917943	-0.127616	1.24397	2.96663	1.11893	-0.924225	-0.925184	-0.507298	-0.498951
1421	chr1-168767563-168768539	176	chr1-168767563-168768539	977	0		0		intergenic	0	38298	0	-0.81147	-0.316795	-0.722988	-0.385725	-0.550712	-0.661753	-0.167747	0.352999	0.917943	-0.127616	1.24397	2.96663	1.11893	-0.924225	-0.925184	-0.507298	-0.498951
1422	chr1-168783169-168784185	176	chr1-168783169-168784185	1017	0		0		intergenic	0	53904	0	-0.81147	-0.316795	-0.722988	-0.385725	-0.550712	-0.661753	-0.167747	0.352999	0.917943	-0.127616	1.24397	2.96663	1.11893	-0.924225	-0.925184	-0.507298	-0.498951
1423	chr1-168879916-168881170	176	chr1-168879916-168881170	1255	0		0		intergenic	0	150651	0	-0.81147	-0.316795	-0.722988	-0.385725	-0.550712	-0.661753	-0.167747	0.352999	0.917943	-0.127616	1.24397	2.96663	1.11893	-0.924225	-0.925184	-0.507298	-0.498951
1424	chr1-168970667-168971972	176	chr1-168970667-168971972	1306	0		0		intergenic	0	133724	0	-0.81147	-0.316795	-0.722988	-0.385725	-0.550712	-0.661753	-0.167747	0.352999	0.917943	-0.127616	1.24397	2.96663	1.11893	-0.924225	-0.925184	-0.507298	-0.498951
1425	chr1-168972741-168973725	176	chr1-168972741-168973725	985	0		0		intergenic	0	131971	0	-0.81147	-0.316795	-0.722988	-0.385725	-0.550712	-0.661753	-0.167747	0.352999	0.917943	-0.127616	1.24397	2.96663	1.11893	-0.924225	-0.925184	-0.507298	-0.498951
1426	chr1-169027344-169028540	176	chr1-169027344-169028540	1197	0		0		intergenic	0	77156	0	-0.81147	-0.316795	-0.722988	-0.385725	-0.550712	-0.661753	-0.167747	0.352999	0.917943	-0.127616	1.24397	2.96663	1.11893	-0.924225	-0.925184	-0.507298	-0.498951
1427	chr1-169031347-169031938	176	chr1-169031347-169031938	592	0		0		intergenic	0	73758	0	-0.81147	-0.316795	-0.722988	-0.385725	-0.550712	-0.661753	-0.167747	0.352999	0.917943	-0.127616	1.24397	2.96663	1.11893	-0.924225	-0.925184	-0.507298	-0.498951
1428	chr1-169060887-169061652	176	chr1-169060887-169061652	766	0		0		intergenic	0	44044	0	-0.81147	-0.316795	-0.722988	-0.385725	-0.550712	-0.661753	-0.167747	0.352999	0.917943	-0.127616	1.24397	2.96663	1.11893	-0.924225	-0.925184	-0.507298	-0.498951
1429	chr1-169207437-169208866	176	chr1-169207437-169208866	1430	0	ENSG00000143156	1	NME7	intron	0	16726	0	-0.81147	-0.316795	-0.722988	-0.385725	-0.550712	-0.661753	-0.167747	0.352999	0.917943	-0.127616	1.24397	2.96663	1.11893	-0.924225	-0.925184	-0.507298	-0.498951
1430	chr1-16882632-16883421	180	chr1-16882632-16883421	790	0	ENSG00000058453	1	CROCC	intron	0	38528	0	-0.817949	0.281666	-0.867849	-0.699405	-1.20858	-1.27776	-0.287644	0.850888	0.926214	0.898603	1.74129	1.5877	1.36315	-0.893521	-0.0369184	-0.87056	-0.689327
1431	chr1-16972283-16972846	180	chr1-16972283-16972846	564	1	ENSG00000058453	1	CROCC	exon	0	2497	0	-0.817949	0.281666	-0.867849	-0.699405	-1.20858	-1.27776	-0.287644	0.850888	0.926214	0.898603	1.74129	1.5877	1.36315	-0.893521	-0.0369184	-0.87056	-0.689327
1432	chr1-16978476-16979340	180	chr1-16978476-16979340	865	0	ENSG00000117122	1	MFAP2	promoter	1	161	0	-0.817949	0.281666	-0.867849	-0.699405	-1.20858	-1.27776	-0.287644	0.850888	0.926214	0.898603	1.74129	1.5877	1.36315	-0.893521	-0.0369184	-0.87056	-0.689327
1433	chr1-16979417-16980870	180	chr1-16979417-16980870	1454	1	ENSG00000117122	1	MFAP2	exon	1	0	0	-0.817949	0.281666	-0.867849	-0.699405	-1.20858	-1.27776	-0.287644	0.850888	0.926214	0.898603	1.74129	1.5877	1.36315	-0.893521	-0.0369184	-0.87056	-0.689327
1434	chr1-16984504-16985221	180	chr1-16984504-16985221	718	0		0		intergenic	0	3668	0	-0.817949	0.281666	-0.867849	-0.699405	-1.20858	-1.27776	-0.287644	0.850888	0.926214	0.898603	1.74129	1.5877	1.36315	-0.893521	-0.0369184	-0.87056	-0.689327
1435	chr1-17063381-17064174	180	chr1-17063381-17064174	794	0		0		intergenic	0	9210	0	-0.817949	0.281666	-0.867849	-0.699405	-1.20858	-1.27776	-0.287644	0.850888	0.926214	0.898603	1.74129	1.5877	1.36315	-0.893521	-0.0369184	-0.87056	-0.689327
1436	chr1-168939140-168940157	178	chr1-168939140-168940157	1018	0		0		intergenic	0	165539	0	-0.499143	0.246714	1.98116	0.0869638	2.3728	1.81514	0.106354	-0.454297	-0.508856	-0.7563	-0.640595	-0.591554	-0.539746	-0.742445	-0.6949	-0.575816	-0.60548
1437	chr1-168958228-168959361	178	chr1-168958228-168959361	1134	0		0		intergenic	0	146335	0	-0.499143	0.246714	1.98116	0.0869638	2.3728	1.81514	0.106354	-0.454297	-0.508856	-0.7563	-0.640595	-0.591554	-0.539746	-0.742445	-0.6949	-0.575816	-0.60548
1438	chr1-169000694-169002185	178	chr1-169000694-169002185	1492	0		0		intergenic	0	103511	0	-0.499143	0.246714	1.98116	0.0869638	2.3728	1.81514	0.106354	-0.454297	-0.508856	-0.7563	-0.640595	-0.591554	-0.539746	-0.742445	-0.6949	-0.575816	-0.60548
1439	chr1-169180892-169182116	178	chr1-169180892-169182116	1225	0	ENSG00000143156	1	NME7	intron	0	8593	0	-0.499143	0.246714	1.98116	0.0869638	2.3728	1.81514	0.106354	-0.454297	-0.508856	-0.7563	-0.640595	-0.591554	-0.539746	-0.742445	-0.6949	-0.575816	-0.60548
1440	chr1-169694030-169694702	181	chr1-169694030-169694702	673	0	ENSG00000188404	1	SELL	intron	0	8626	0	-0.474819	0.604079	2.68855	-0.456971	1.88288	1.46712	-0.56449	-0.526274	-0.516801	-0.712776	-0.495488	-0.45969	-0.278194	-0.62853	-0.150113	-0.721932	-0.656559
1441	chr1-169744867-169746063	181	chr1-169744867-169746063	1197	0	ENSG00000007908	1	SELE	intron	0	10804	0	-0.474819	0.604079	2.68855	-0.456971	1.88288	1.46712	-0.56449	-0.526274	-0.516801	-0.712776	-0.495488	-0.45969	-0.278194	-0.62853	-0.150113	-0.721932	-0.656559
1442	chr1-169998929-170000311	181	chr1-169998929-170000311	1383	0	ENSG00000075945	1	KIFAP3	intron	0	31898	0	-0.474819	0.604079	2.68855	-0.456971	1.88288	1.46712	-0.56449	-0.526274	-0.516801	-0.712776	-0.495488	-0.45969	-0.278194	-0.62853	-0.150113	-0.721932	-0.656559
1443	chr1-170164873-170165593	181	chr1-170164873-170165593	721	0	ENSG00000203740	1	METTL11B	intron	0	6903	0	-0.474819	0.604079	2.68855	-0.456971	1.88288	1.46712	-0.56449	-0.526274	-0.516801	-0.712776	-0.495488	-0.45969	-0.278194	-0.62853	-0.150113	-0.721932	-0.656559
1444	chr1-170175110-170176001	181	chr1-170175110-170176001	892	0		0		intergenic	0	17140	0	-0.474819	0.604079	2.68855	-0.456971	1.88288	1.46712	-0.56449	-0.526274	-0.516801	-0.712776	-0.495488	-0.45969	-0.278194	-0.62853	-0.150113	-0.721932	-0.656559
1445	chr1-17013026-17014295	197	chr1-17013026-17014295	1270	0	ENSG00000159363	0	ATP13A2	promoter	1	1097	0	-0.6494	-0.270063	1.61145	0.400113	2.81339	0.642239	0.435629	0.906008	-0.351624	-0.799929	-0.973114	-0.744746	-0.320186	-0.337964	-0.966696	-0.595815	-0.799293
1446	chr1-17027872-17029125	197	chr1-17027872-17029125	1254	1	ENSG00000117118	1	SDHB	exon	0	4711	0	-0.6494	-0.270063	1.61145	0.400113	2.81339	0.642239	0.435629	0.906008	-0.351624	-0.799929	-0.973114	-0.744746	-0.320186	-0.337964	-0.966696	-0.595815	-0.799293
1447	chr1-17308832-17309804	197	chr1-17308832-17309804	973	0	ENSG00000159339	1	PADI4	intron	0	634	0	-0.6494	-0.270063	1.61145	0.400113	2.81339	0.642239	0.435629	0.906008	-0.351624	-0.799929	-0.973114	-0.744746	-0.320186	-0.337964	-0.966696	-0.595815	-0.799293
1448	chr1-170213508-170214006	183	chr1-170213508-170214006	499	0		0		intergenic	0	55538	0	-0.664361	-0.192244	-0.966863	-0.90304	-0.915409	-1.07275	-0.545944	-0.621295	0.222302	1.64249	1.63086	0.462015	0.875608	-0.800421	2.03895	-0.764073	0.574171
1449	chr1-170214016-170214533	183	chr1-170214016-170214533	518	0		0		intergenic	0	56046	0	-0.664361	-0.192244	-0.966863	-0.90304	-0.915409	-1.07275	-0.545944	-0.621295	0.222302	1.64249	1.63086	0.462015	0.875608	-0.800421	2.03895	-0.764073	0.574171
1450	chr1-170214775-170215803	183	chr1-170214775-170215803	1029	0		0		intergenic	0	56805	0	-0.664361	-0.192244	-0.966863	-0.90304	-0.915409	-1.07275	-0.545944	-0.621295	0.222302	1.64249	1.63086	0.462015	0.875608	-0.800421	2.03895	-0.764073	0.574171
1451	chr1-170273119-170274426	183	chr1-170273119-170274426	1308	0		0		intergenic	0	115149	0	-0.664361	-0.192244	-0.966863	-0.90304	-0.915409	-1.07275	-0.545944	-0.621295	0.222302	1.64249	1.63086	0.462015	0.875608	-0.800421	2.03895	-0.764073	0.574171
1452	chr1-170350906-170352026	183	chr1-170350906-170352026	1121	0		0		intergenic	0	180102	0	-0.664361	-0.192244	-0.966863	-0.90304	-0.915409	-1.07275	-0.545944	-0.621295	0.222302	1.64249	1.63086	0.462015	0.875608	-0.800421	2.03895	-0.764073	0.574171
1453	chr1-170402065-170403074	183	chr1-170402065-170403074	1010	0		0		intergenic	0	129054	0	-0.664361	-0.192244	-0.966863	-0.90304	-0.915409	-1.07275	-0.545944	-0.621295	0.222302	1.64249	1.63086	0.462015	0.875608	-0.800421	2.03895	-0.764073	0.574171
1454	chr1-170493963-170495404	183	chr1-170493963-170495404	1442	0		0		intergenic	0	36724	0	-0.664361	-0.192244	-0.966863	-0.90304	-0.915409	-1.07275	-0.545944	-0.621295	0.222302	1.64249	1.63086	0.462015	0.875608	-0.800421	2.03895	-0.764073	0.574171
1455	chr1-170562392-170563573	183	chr1-170562392-170563573	1182	0		0		intergenic	0	17751	0	-0.664361	-0.192244	-0.966863	-0.90304	-0.915409	-1.07275	-0.545944	-0.621295	0.222302	1.64249	1.63086	0.462015	0.875608	-0.800421	2.03895	-0.764073	0.574171
1456	chr1-170586051-170587488	183	chr1-170586051-170587488	1438	0		0		intergenic	0	41410	0	-0.664361	-0.192244	-0.966863	-0.90304	-0.915409	-1.07275	-0.545944	-0.621295	0.222302	1.64249	1.63086	0.462015	0.875608	-0.800421	2.03895	-0.764073	0.574171
1457	chr1-170698331-170699305	183	chr1-170698331-170699305	975	0	ENSG00000116132	1	PRRX1	intron	0	23311	0	-0.664361	-0.192244	-0.966863	-0.90304	-0.915409	-1.07275	-0.545944	-0.621295	0.222302	1.64249	1.63086	0.462015	0.875608	-0.800421	2.03895	-0.764073	0.574171
1458	chr1-17029873-17030553	203	chr1-17029873-17030553	681	0	ENSG00000117118	1	SDHB	intron	0	6712	0	1.20003	-0.439935	-0.910186	-0.938344	-0.920635	-1.01282	-0.644859	-0.588452	-0.175553	2.81788	0.735691	1.12499	0.340663	-0.0966567	-0.850726	-0.226939	0.585842
1459	chr1-17096905-17098140	203	chr1-17096905-17098140	1236	0	ENSG00000117115	1	PADI2	intron	0	13478	0	1.20003	-0.439935	-0.910186	-0.938344	-0.920635	-1.01282	-0.644859	-0.588452	-0.175553	2.81788	0.735691	1.12499	0.340663	-0.0966567	-0.850726	-0.226939	0.585842
1460	chr1-17273975-17274494	203	chr1-17273975-17274494	520	0	ENSG00000142619	1	PADI3	intron	0	24876	0	1.20003	-0.439935	-0.910186	-0.938344	-0.920635	-1.01282	-0.644859	-0.588452	-0.175553	2.81788	0.735691	1.12499	0.340663	-0.0966567	-0.850726	-0.226939	0.585842
1461	chr1-17283663-17284266	203	chr1-17283663-17284266	604	1	ENSG00000142619	1	PADI3	exon	0	23928	0	1.20003	-0.439935	-0.910186	-0.938344	-0.920635	-1.01282	-0.644859	-0.588452	-0.175553	2.81788	0.735691	1.12499	0.340663	-0.0966567	-0.850726	-0.226939	0.585842
1462	chr1-17419550-17420237	203	chr1-17419550-17420237	688	0	ENSG00000179051	1	RCC2	intron	0	10503	0	1.20003	-0.439935	-0.910186	-0.938344	-0.920635	-1.01282	-0.644859	-0.588452	-0.175553	2.81788	0.735691	1.12499	0.340663	-0.0966567	-0.850726	-0.226939	0.585842
1463	chr1-17469492-17470486	203	chr1-17469492-17470486	995	0		0		intergenic	0	29767	0	1.20003	-0.439935	-0.910186	-0.938344	-0.920635	-1.01282	-0.644859	-0.588452	-0.175553	2.81788	0.735691	1.12499	0.340663	-0.0966567	-0.850726	-0.226939	0.585842
1464	chr1-17486776-17487009	203	chr1-17486776-17487009	234	0		0		intergenic	0	47051	0	1.20003	-0.439935	-0.910186	-0.938344	-0.920635	-1.01282	-0.644859	-0.588452	-0.175553	2.81788	0.735691	1.12499	0.340663	-0.0966567	-0.850726	-0.226939	0.585842
1465	chr1-17488632-17490005	203	chr1-17488632-17490005	1374	0		0		intergenic	0	48907	0	1.20003	-0.439935	-0.910186	-0.938344	-0.920635	-1.01282	-0.644859	-0.588452	-0.175553	2.81788	0.735691	1.12499	0.340663	-0.0966567	-0.850726	-0.226939	0.585842
1466	chr1-17497861-17498576	203	chr1-17497861-17498576	716	0		0		intergenic	0	41258	0	1.20003	-0.439935	-0.910186	-0.938344	-0.920635	-1.01282	-0.644859	-0.588452	-0.175553	2.81788	0.735691	1.12499	0.340663	-0.0966567	-0.850726	-0.226939	0.585842
1467	chr1-17502161-17502945	203	chr1-17502161-17502945	785	0		0		intergenic	0	36889	0	1.20003	-0.439935	-0.910186	-0.938344	-0.920635	-1.01282	-0.644859	-0.588452	-0.175553	2.81788	0.735691	1.12499	0.340663	-0.0966567	-0.850726	-0.226939	0.585842
1468	chr1-17527087-17527862	203	chr1-17527087-17527862	776	0		0		intergenic	0	11972	0	1.20003	-0.439935	-0.910186	-0.938344	-0.920635	-1.01282	-0.644859	-0.588452	-0.175553	2.81788	0.735691	1.12499	0.340663	-0.0966567	-0.850726	-0.226939	0.585842
1469	chr1-17531302-17532489	203	chr1-17531302-17532489	1188	0		0		intergenic	0	7345	0	1.20003	-0.439935	-0.910186	-0.938344	-0.920635	-1.01282	-0.644859	-0.588452	-0.175553	2.81788	0.735691	1.12499	0.340663	-0.0966567	-0.850726	-0.226939	0.585842
1470	chr1-17545000-17545652	203	chr1-17545000-17545652	653	0	ENSG00000074964	1	ARHGEF10L	intron	0	5164	0	1.20003	-0.439935	-0.910186	-0.938344	-0.920635	-1.01282	-0.644859	-0.588452	-0.175553	2.81788	0.735691	1.12499	0.340663	-0.0966567	-0.850726	-0.226939	0.585842
1471	chr1-17561152-17561936	203	chr1-17561152-17561936	785	0	ENSG00000074964	1	ARHGEF10L	intron	0	18616	0	1.20003	-0.439935	-0.910186	-0.938344	-0.920635	-1.01282	-0.644859	-0.588452	-0.175553	2.81788	0.735691	1.12499	0.340663	-0.0966567	-0.850726	-0.226939	0.585842
1472	chr1-17567574-17567943	203	chr1-17567574-17567943	370	0	ENSG00000074964	1	ARHGEF10L	intron	0	12609	0	1.20003	-0.439935	-0.910186	-0.938344	-0.920635	-1.01282	-0.644859	-0.588452	-0.175553	2.81788	0.735691	1.12499	0.340663	-0.0966567	-0.850726	-0.226939	0.585842
1473	chr1-17569118-17570187	203	chr1-17569118-17570187	1070	0	ENSG00000074964	1	ARHGEF10L	intron	0	10365	0	1.20003	-0.439935	-0.910186	-0.938344	-0.920635	-1.01282	-0.644859	-0.588452	-0.175553	2.81788	0.735691	1.12499	0.340663	-0.0966567	-0.850726	-0.226939	0.585842
1474	chr1-17575785-17576529	203	chr1-17575785-17576529	745	0	ENSG00000074964	1	ARHGEF10L	intron	0	4023	0	1.20003	-0.439935	-0.910186	-0.938344	-0.920635	-1.01282	-0.644859	-0.588452	-0.175553	2.81788	0.735691	1.12499	0.340663	-0.0966567	-0.850726	-0.226939	0.585842
1475	chr1-17605502-17606318	203	chr1-17605502-17606318	817	0	ENSG00000074964	1	ARHGEF10L	intron	0	3330	0	1.20003	-0.439935	-0.910186	-0.938344	-0.920635	-1.01282	-0.644859	-0.588452	-0.175553	2.81788	0.735691	1.12499	0.340663	-0.0966567	-0.850726	-0.226939	0.585842
1476	chr1-17617801-17619205	203	chr1-17617801-17619205	1405	1	ENSG00000074964	1	ARHGEF10L	exon	1	0	0	1.20003	-0.439935	-0.910186	-0.938344	-0.920635	-1.01282	-0.644859	-0.588452	-0.175553	2.81788	0.735691	1.12499	0.340663	-0.0966567	-0.850726	-0.226939	0.585842
1477	chr1-17671352-17672618	203	chr1-17671352-17672618	1267	0	ENSG00000074964	1	ARHGEF10L	intron	0	21428	0	1.20003	-0.439935	-0.910186	-0.938344	-0.920635	-1.01282	-0.644859	-0.588452	-0.175553	2.81788	0.735691	1.12499	0.340663	-0.0966567	-0.850726	-0.226939	0.585842
1478	chr1-17674655-17676057	203	chr1-17674655-17676057	1403	0	ENSG00000074964	1	ARHGEF10L	intron	0	17989	0	1.20003	-0.439935	-0.910186	-0.938344	-0.920635	-1.01282	-0.644859	-0.588452	-0.175553	2.81788	0.735691	1.12499	0.340663	-0.0966567	-0.850726	-0.226939	0.585842
1479	chr1-17676431-17677055	203	chr1-17676431-17677055	625	0	ENSG00000074964	1	ARHGEF10L	intron	0	16991	0	1.20003	-0.439935	-0.910186	-0.938344	-0.920635	-1.01282	-0.644859	-0.588452	-0.175553	2.81788	0.735691	1.12499	0.340663	-0.0966567	-0.850726	-0.226939	0.585842
1480	chr1-17690334-17691472	203	chr1-17690334-17691472	1139	1	ENSG00000074964	1	ARHGEF10L	exon	0	2574	0	1.20003	-0.439935	-0.910186	-0.938344	-0.920635	-1.01282	-0.644859	-0.588452	-0.175553	2.81788	0.735691	1.12499	0.340663	-0.0966567	-0.850726	-0.226939	0.585842
1481	chr1-170545423-170545943	187	chr1-170545423-170545943	521	1	ENSG00000120370	1	GORAB	exon	0	782	0	-0.498443	-0.548989	0.312819	1.11086	1.84046	2.96832	-0.195733	0.0639441	-0.452774	-0.540036	-0.594551	-0.492196	-0.49033	-0.636137	-0.658814	-0.59712	-0.591277
1482	chr1-170734831-170736129	187	chr1-170734831-170736129	1299	1	ENSG00000116132	1	PRRX1	exon	0	4384	0	-0.498443	-0.548989	0.312819	1.11086	1.84046	2.96832	-0.195733	0.0639441	-0.452774	-0.540036	-0.594551	-0.492196	-0.49033	-0.636137	-0.658814	-0.59712	-0.591277
1483	chr1-170928023-170928726	187	chr1-170928023-170928726	704	0		0		intergenic	0	6744	0	-0.498443	-0.548989	0.312819	1.11086	1.84046	2.96832	-0.195733	0.0639441	-0.452774	-0.540036	-0.594551	-0.492196	-0.49033	-0.636137	-0.658814	-0.59712	-0.591277
1484	chr1-170936172-170937329	187	chr1-170936172-170937329	1158	0	ENSG00000117501	1	MROH9	intron	0	645	0	-0.498443	-0.548989	0.312819	1.11086	1.84046	2.96832	-0.195733	0.0639441	-0.452774	-0.540036	-0.594551	-0.492196	-0.49033	-0.636137	-0.658814	-0.59712	-0.591277
1485	chr1-170660221-170660465	184	chr1-170660221-170660465	245	0		0		intergenic	0	2262	0	-0.69047	0.375084	-0.806721	0.0488245	-0.537583	-0.887692	0.598125	-0.330624	-0.0499457	0.933824	0.600783	2.43919	1.9062	-1.12323	-0.996432	-0.834285	-0.645047
1486	chr1-170669230-170669843	184	chr1-170669230-170669843	614	0	ENSG00000116132	1	PRRX1	intron	0	5292	0	-0.69047	0.375084	-0.806721	0.0488245	-0.537583	-0.887692	0.598125	-0.330624	-0.0499457	0.933824	0.600783	2.43919	1.9062	-1.12323	-0.996432	-0.834285	-0.645047
1487	chr1-170670880-170671654	184	chr1-170670880-170671654	775	0	ENSG00000116132	1	PRRX1	intron	0	6942	0	-0.69047	0.375084	-0.806721	0.0488245	-0.537583	-0.887692	0.598125	-0.330624	-0.0499457	0.933824	0.600783	2.43919	1.9062	-1.12323	-0.996432	-0.834285	-0.645047
1488	chr1-170716527-170717797	185	chr1-170716527-170717797	1271	0	ENSG00000116132	1	PRRX1	intron	0	4819	0	-1.03475	1.57763	-0.72245	0.770692	-0.476012	-0.188437	0.534152	-0.159033	1.74864	-0.0978284	2.08905	-0.498326	-0.348167	-1.32345	-1.31381	0.119517	-0.677425
1489	chr1-170805653-170806730	185	chr1-170805653-170806730	1078	0		0		intergenic	0	75206	0	-1.03475	1.57763	-0.72245	0.770692	-0.476012	-0.188437	0.534152	-0.159033	1.74864	-0.0978284	2.08905	-0.498326	-0.348167	-1.32345	-1.31381	0.119517	-0.677425
1490	chr1-170806791-170807796	185	chr1-170806791-170807796	1006	0		0		intergenic	0	76344	0	-1.03475	1.57763	-0.72245	0.770692	-0.476012	-0.188437	0.534152	-0.159033	1.74864	-0.0978284	2.08905	-0.498326	-0.348167	-1.32345	-1.31381	0.119517	-0.677425
1491	chr1-171110701-171111429	188	chr1-171110701-171111429	729	1	ENSG00000007933	1	FMO3	exon	0	9938	0	-1.01931	0.275249	-0.731842	-0.526576	-0.80742	-0.733761	-0.49793	1.06645	1.56331	0.389225	1.52518	2.29121	-0.17579	-0.147936	-0.997967	-0.425169	-1.04692
1492	chr1-171159829-171161272	188	chr1-171159829-171161272	1444	0		0		intergenic	0	23935	0	-1.01931	0.275249	-0.731842	-0.526576	-0.80742	-0.733761	-0.49793	1.06645	1.56331	0.389225	1.52518	2.29121	-0.17579	-0.147936	-0.997967	-0.425169	-1.04692
1493	chr1-171185013-171185542	188	chr1-171185013-171185542	530	1	ENSG00000094963	1	FMO2	exon	1	0	0	-1.01931	0.275249	-0.731842	-0.526576	-0.80742	-0.733761	-0.49793	1.06645	1.56331	0.389225	1.52518	2.29121	-0.17579	-0.147936	-0.997967	-0.425169	-1.04692
1494	chr1-171219249-171219767	188	chr1-171219249-171219767	519	0		0		intergenic	0	11705	0	-1.01931	0.275249	-0.731842	-0.526576	-0.80742	-0.733761	-0.49793	1.06645	1.56331	0.389225	1.52518	2.29121	-0.17579	-0.147936	-0.997967	-0.425169	-1.04692
1495	chr1-171219886-171221075	188	chr1-171219886-171221075	1190	0		0		intergenic	0	12342	0	-1.01931	0.275249	-0.731842	-0.526576	-0.80742	-0.733761	-0.49793	1.06645	1.56331	0.389225	1.52518	2.29121	-0.17579	-0.147936	-0.997967	-0.425169	-1.04692
1496	chr1-171263711-171264248	188	chr1-171263711-171264248	538	0	ENSG00000010932	1	FMO1	intron	0	5620	0	-1.01931	0.275249	-0.731842	-0.526576	-0.80742	-0.733761	-0.49793	1.06645	1.56331	0.389225	1.52518	2.29121	-0.17579	-0.147936	-0.997967	-0.425169	-1.04692
1497	chr1-171313388-171314600	188	chr1-171313388-171314600	1213	1	ENSG00000076258	1	FMO4	exon	1	0	0	-1.01931	0.275249	-0.731842	-0.526576	-0.80742	-0.733761	-0.49793	1.06645	1.56331	0.389225	1.52518	2.29121	-0.17579	-0.147936	-0.997967	-0.425169	-1.04692
1498	chr1-171248256-171248809	189	chr1-171248256-171248809	554	1	ENSG00000010932	1	FMO1	exon	1	0	0	-0.50656	-0.610661	0.0496547	2.18438	0.958804	2.07084	-0.11745	1.24008	0.569834	-0.779973	-0.522526	-0.445011	-0.588448	-0.921601	-0.832164	-0.787793	-0.961417
1499	chr1-171251014-171252036	189	chr1-171251014-171252036	1023	0	ENSG00000010932	1	FMO1	intron	0	2514	0	-0.50656	-0.610661	0.0496547	2.18438	0.958804	2.07084	-0.11745	1.24008	0.569834	-0.779973	-0.522526	-0.445011	-0.588448	-0.921601	-0.832164	-0.787793	-0.961417
1500	chr1-171252493-171252804	189	chr1-171252493-171252804	312	0	ENSG00000010932	1	FMO1	intron	0	3993	0	-0.50656	-0.610661	0.0496547	2.18438	0.958804	2.07084	-0.11745	1.24008	0.569834	-0.779973	-0.522526	-0.445011	-0.588448	-0.921601	-0.832164	-0.787793	-0.961417
1501	chr1-171393213-171394251	189	chr1-171393213-171394251	1039	0		0		intergenic	0	58686	0	-0.50656	-0.610661	0.0496547	2.18438	0.958804	2.07084	-0.11745	1.24008	0.569834	-0.779973	-0.522526	-0.445011	-0.588448	-0.921601	-0.832164	-0.787793	-0.961417
1502	chr1-171396894-171397584	189	chr1-171396894-171397584	691	0		0		intergenic	0	62367	0	-0.50656	-0.610661	0.0496547	2.18438	0.958804	2.07084	-0.11745	1.24008	0.569834	-0.779973	-0.522526	-0.445011	-0.588448	-0.921601	-0.832164	-0.787793	-0.961417
1503	chr1-17141332-17142168	206	chr1-17141332-17142168	837	0		0		intergenic	0	21896	0	-0.132134	-0.252068	-0.28591	-0.272184	-0.288881	-0.290493	-0.27126	-0.280573	-0.281923	-0.173279	-0.273099	-0.275332	-0.194015	3.99603	-0.207892	-0.271811	-0.245181
1504	chr1-17206916-17207437	206	chr1-17206916-17207437	522	0	ENSG00000142623	1	PADI1	intron	0	1789	0	-0.132134	-0.252068	-0.28591	-0.272184	-0.288881	-0.290493	-0.27126	-0.280573	-0.281923	-0.173279	-0.273099	-0.275332	-0.194015	3.99603	-0.207892	-0.271811	-0.245181
1505	chr1-17208049-17208317	206	chr1-17208049-17208317	269	0	ENSG00000142623	1	PADI1	intron	0	2922	0	-0.132134	-0.252068	-0.28591	-0.272184	-0.288881	-0.290493	-0.27126	-0.280573	-0.281923	-0.173279	-0.273099	-0.275332	-0.194015	3.99603	-0.207892	-0.271811	-0.245181
1506	chr1-17431319-17432167	206	chr1-17431319-17432167	849	0	ENSG00000179051	1	RCC2	intron	0	6393	0	-0.132134	-0.252068	-0.28591	-0.272184	-0.288881	-0.290493	-0.27126	-0.280573	-0.281923	-0.173279	-0.273099	-0.275332	-0.194015	3.99603	-0.207892	-0.271811	-0.245181
1507	chr1-17615191-17615497	206	chr1-17615191-17615497	307	1	ENSG00000074964	1	ARHGEF10L	exon	0	102	0	-0.132134	-0.252068	-0.28591	-0.272184	-0.288881	-0.290493	-0.27126	-0.280573	-0.281923	-0.173279	-0.273099	-0.275332	-0.194015	3.99603	-0.207892	-0.271811	-0.245181
1508	chr1-17629957-17630382	206	chr1-17629957-17630382	426	0	ENSG00000074964	1	ARHGEF10L	intron	0	3874	0	-0.132134	-0.252068	-0.28591	-0.272184	-0.288881	-0.290493	-0.27126	-0.280573	-0.281923	-0.173279	-0.273099	-0.275332	-0.194015	3.99603	-0.207892	-0.271811	-0.245181
1509	chr1-17635554-17636229	206	chr1-17635554-17636229	676	0	ENSG00000074964	1	ARHGEF10L	intron	0	1296	0	-0.132134	-0.252068	-0.28591	-0.272184	-0.288881	-0.290493	-0.27126	-0.280573	-0.281923	-0.173279	-0.273099	-0.275332	-0.194015	3.99603	-0.207892	-0.271811	-0.245181
1510	chr1-171868056-171868662	190	chr1-171868056-171868662	607	0	ENSG00000197959	1	DNM3	intron	0	26526	0	-0.913019	0.189107	2.56482	0.513628	1.16198	0.577573	0.7126	-0.459131	-0.679158	-1.03915	-0.969546	-1.01362	-0.841038	-0.914985	1.33664	-0.215255	-0.0114436
1511	chr1-171868839-171870328	190	chr1-171868839-171870328	1490	0	ENSG00000197959	1	DNM3	intron	0	27309	0	-0.913019	0.189107	2.56482	0.513628	1.16198	0.577573	0.7126	-0.459131	-0.679158	-1.03915	-0.969546	-1.01362	-0.841038	-0.914985	1.33664	-0.215255	-0.0114436
1512	chr1-171881300-171881827	190	chr1-171881300-171881827	528	0	ENSG00000197959	1	DNM3	intron	0	39770	0	-0.913019	0.189107	2.56482	0.513628	1.16198	0.577573	0.7126	-0.459131	-0.679158	-1.03915	-0.969546	-1.01362	-0.841038	-0.914985	1.33664	-0.215255	-0.0114436
1513	chr1-172002513-172003720	192	chr1-172002513-172003720	1208	0	ENSG00000197959	1	DNM3	intron	0	32390	0	-0.846094	0.200616	-0.696114	-0.58617	-0.766097	-0.883044	-0.496393	1.45712	2.40498	-0.0474119	1.92332	0.16314	0.679339	-0.905993	-0.411757	-0.658761	-0.530682
1514	chr1-172041227-172042185	192	chr1-172041227-172042185	959	1	ENSG00000197959	1	DNM3	exon	0	71104	0	-0.846094	0.200616	-0.696114	-0.58617	-0.766097	-0.883044	-0.496393	1.45712	2.40498	-0.0474119	1.92332	0.16314	0.679339	-0.905993	-0.411757	-0.658761	-0.530682
1515	chr1-172044103-172045064	192	chr1-172044103-172045064	962	1	ENSG00000197959	1	DNM3	exon	0	73980	0	-0.846094	0.200616	-0.696114	-0.58617	-0.766097	-0.883044	-0.496393	1.45712	2.40498	-0.0474119	1.92332	0.16314	0.679339	-0.905993	-0.411757	-0.658761	-0.530682
1516	chr1-172069388-172070157	192	chr1-172069388-172070157	770	0	ENSG00000197959	1	DNM3	intron	0	99265	0	-0.846094	0.200616	-0.696114	-0.58617	-0.766097	-0.883044	-0.496393	1.45712	2.40498	-0.0474119	1.92332	0.16314	0.679339	-0.905993	-0.411757	-0.658761	-0.530682
1517	chr1-172071199-172072623	192	chr1-172071199-172072623	1425	0	ENSG00000197959	1	DNM3	intron	0	101076	0	-0.846094	0.200616	-0.696114	-0.58617	-0.766097	-0.883044	-0.496393	1.45712	2.40498	-0.0474119	1.92332	0.16314	0.679339	-0.905993	-0.411757	-0.658761	-0.530682
1518	chr1-172083962-172085167	192	chr1-172083962-172085167	1206	0	ENSG00000197959	1	DNM3	intron	0	113839	0	-0.846094	0.200616	-0.696114	-0.58617	-0.766097	-0.883044	-0.496393	1.45712	2.40498	-0.0474119	1.92332	0.16314	0.679339	-0.905993	-0.411757	-0.658761	-0.530682
1519	chr1-172088171-172088676	192	chr1-172088171-172088676	506	0	ENSG00000197959	1	DNM3	intron	0	118048	0	-0.846094	0.200616	-0.696114	-0.58617	-0.766097	-0.883044	-0.496393	1.45712	2.40498	-0.0474119	1.92332	0.16314	0.679339	-0.905993	-0.411757	-0.658761	-0.530682
1520	chr1-172089285-172089840	192	chr1-172089285-172089840	556	0	ENSG00000197959	1	DNM3	intron	0	119162	0	-0.846094	0.200616	-0.696114	-0.58617	-0.766097	-0.883044	-0.496393	1.45712	2.40498	-0.0474119	1.92332	0.16314	0.679339	-0.905993	-0.411757	-0.658761	-0.530682
1521	chr1-172094834-172095747	192	chr1-172094834-172095747	914	0	ENSG00000197959	1	DNM3	intron	0	124711	0	-0.846094	0.200616	-0.696114	-0.58617	-0.766097	-0.883044	-0.496393	1.45712	2.40498	-0.0474119	1.92332	0.16314	0.679339	-0.905993	-0.411757	-0.658761	-0.530682
1522	chr1-172109083-172110284	192	chr1-172109083-172110284	1202	0	ENSG00000197959	1	DNM3	intron	0	138960	0	-0.846094	0.200616	-0.696114	-0.58617	-0.766097	-0.883044	-0.496393	1.45712	2.40498	-0.0474119	1.92332	0.16314	0.679339	-0.905993	-0.411757	-0.658761	-0.530682
1523	chr1-172137820-172138303	192	chr1-172137820-172138303	484	0	ENSG00000197959	1	DNM3	intron	0	167697	0	-0.846094	0.200616	-0.696114	-0.58617	-0.766097	-0.883044	-0.496393	1.45712	2.40498	-0.0474119	1.92332	0.16314	0.679339	-0.905993	-0.411757	-0.658761	-0.530682
1524	chr1-172143255-172143781	192	chr1-172143255-172143781	527	0	ENSG00000197959	1	DNM3	intron	0	173132	0	-0.846094	0.200616	-0.696114	-0.58617	-0.766097	-0.883044	-0.496393	1.45712	2.40498	-0.0474119	1.92332	0.16314	0.679339	-0.905993	-0.411757	-0.658761	-0.530682
1525	chr1-172185044-172185734	192	chr1-172185044-172185734	691	0	ENSG00000197959	1	DNM3	intron	0	193283	0	-0.846094	0.200616	-0.696114	-0.58617	-0.766097	-0.883044	-0.496393	1.45712	2.40498	-0.0474119	1.92332	0.16314	0.679339	-0.905993	-0.411757	-0.658761	-0.530682
1526	chr1-172210388-172211718	192	chr1-172210388-172211718	1331	0	ENSG00000197959	1	DNM3	intron	0	167299	0	-0.846094	0.200616	-0.696114	-0.58617	-0.766097	-0.883044	-0.496393	1.45712	2.40498	-0.0474119	1.92332	0.16314	0.679339	-0.905993	-0.411757	-0.658761	-0.530682
1527	chr1-172229671-172230293	192	chr1-172229671-172230293	623	0	ENSG00000197959	1	DNM3	intron	0	148724	0	-0.846094	0.200616	-0.696114	-0.58617	-0.766097	-0.883044	-0.496393	1.45712	2.40498	-0.0474119	1.92332	0.16314	0.679339	-0.905993	-0.411757	-0.658761	-0.530682
1528	chr1-172292739-172294055	192	chr1-172292739-172294055	1317	0	ENSG00000197959	1	DNM3	intron	0	84962	0	-0.846094	0.200616	-0.696114	-0.58617	-0.766097	-0.883044	-0.496393	1.45712	2.40498	-0.0474119	1.92332	0.16314	0.679339	-0.905993	-0.411757	-0.658761	-0.530682
1529	chr1-172307788-172308909	192	chr1-172307788-172308909	1122	1	ENSG00000197959	1	DNM3	exon	0	70108	0	-0.846094	0.200616	-0.696114	-0.58617	-0.766097	-0.883044	-0.496393	1.45712	2.40498	-0.0474119	1.92332	0.16314	0.679339	-0.905993	-0.411757	-0.658761	-0.530682
1530	chr1-172378043-172378717	192	chr1-172378043-172378717	675	1	ENSG00000135845	1	PIGC	exon	1	300	0	-0.846094	0.200616	-0.696114	-0.58617	-0.766097	-0.883044	-0.496393	1.45712	2.40498	-0.0474119	1.92332	0.16314	0.679339	-0.905993	-0.411757	-0.658761	-0.530682
1531	chr1-172381823-172382291	192	chr1-172381823-172382291	469	0	ENSG00000135845	1	PIGC	promoter	1	916	0	-0.846094	0.200616	-0.696114	-0.58617	-0.766097	-0.883044	-0.496393	1.45712	2.40498	-0.0474119	1.92332	0.16314	0.679339	-0.905993	-0.411757	-0.658761	-0.530682
1532	chr1-172382780-172383923	192	chr1-172382780-172383923	1144	0	ENSG00000135845	1	PIGC	promoter	1	1873	0	-0.846094	0.200616	-0.696114	-0.58617	-0.766097	-0.883044	-0.496393	1.45712	2.40498	-0.0474119	1.92332	0.16314	0.679339	-0.905993	-0.411757	-0.658761	-0.530682
1533	chr1-172398192-172398486	192	chr1-172398192-172398486	295	0	ENSG00000135845	1	PIGC	intron	0	11003	0	-0.846094	0.200616	-0.696114	-0.58617	-0.766097	-0.883044	-0.496393	1.45712	2.40498	-0.0474119	1.92332	0.16314	0.679339	-0.905993	-0.411757	-0.658761	-0.530682
1534	chr1-172401482-172401769	192	chr1-172401482-172401769	288	0	ENSG00000135845	1	PIGC	intron	0	13556	0	-0.846094	0.200616	-0.696114	-0.58617	-0.766097	-0.883044	-0.496393	1.45712	2.40498	-0.0474119	1.92332	0.16314	0.679339	-0.905993	-0.411757	-0.658761	-0.530682
1535	chr1-172460675-172461467	192	chr1-172460675-172461467	793	0	ENSG00000180999	1	C1orf105	intron	0	7781	0	-0.846094	0.200616	-0.696114	-0.58617	-0.766097	-0.883044	-0.496393	1.45712	2.40498	-0.0474119	1.92332	0.16314	0.679339	-0.905993	-0.411757	-0.658761	-0.530682
1536	chr1-172507197-172508311	193	chr1-172507197-172508311	1115	0		0		intergenic	0	24037	0	-0.459218	0.129768	-0.687583	-0.232802	-0.576647	-0.495912	-0.250383	-0.509544	-0.474432	-0.194501	0.597462	3.68402	0.683863	-0.396868	-0.421653	0.170606	-0.566179
1537	chr1-172674491-172675658	193	chr1-172674491-172675658	1168	0		0		intergenic	0	15346	0	-0.459218	0.129768	-0.687583	-0.232802	-0.576647	-0.495912	-0.250383	-0.509544	-0.474432	-0.194501	0.597462	3.68402	0.683863	-0.396868	-0.421653	0.170606	-0.566179
1538	chr1-172699124-172700084	193	chr1-172699124-172700084	961	0		0		intergenic	0	39979	0	-0.459218	0.129768	-0.687583	-0.232802	-0.576647	-0.495912	-0.250383	-0.509544	-0.474432	-0.194501	0.597462	3.68402	0.683863	-0.396868	-0.421653	0.170606	-0.566179
1539	chr1-172716095-172716876	193	chr1-172716095-172716876	782	0		0		intergenic	0	56950	0	-0.459218	0.129768	-0.687583	-0.232802	-0.576647	-0.495912	-0.250383	-0.509544	-0.474432	-0.194501	0.597462	3.68402	0.683863	-0.396868	-0.421653	0.170606	-0.566179
1540	chr1-172723114-172723645	193	chr1-172723114-172723645	532	0		0		intergenic	0	63969	0	-0.459218	0.129768	-0.687583	-0.232802	-0.576647	-0.495912	-0.250383	-0.509544	-0.474432	-0.194501	0.597462	3.68402	0.683863	-0.396868	-0.421653	0.170606	-0.566179
1541	chr1-172850760-172852104	193	chr1-172850760-172852104	1345	0		0		intergenic	0	191615	0	-0.459218	0.129768	-0.687583	-0.232802	-0.576647	-0.495912	-0.250383	-0.509544	-0.474432	-0.194501	0.597462	3.68402	0.683863	-0.396868	-0.421653	0.170606	-0.566179
1542	chr1-172914306-172915159	193	chr1-172914306-172915159	854	0		0		intergenic	0	135803	0	-0.459218	0.129768	-0.687583	-0.232802	-0.576647	-0.495912	-0.250383	-0.509544	-0.474432	-0.194501	0.597462	3.68402	0.683863	-0.396868	-0.421653	0.170606	-0.566179
1543	chr1-172744790-172745342	194	chr1-172744790-172745342	553	0		0		intergenic	0	85645	0	-0.536193	-0.0868271	-0.721693	-0.640674	-0.859166	-0.824792	-0.53864	0.685698	0.783617	0.237962	0.431481	0.296464	0.0124043	3.40498	-0.23862	-0.629657	-0.776342
1544	chr1-172746034-172746664	194	chr1-172746034-172746664	631	0		0		intergenic	0	86889	0	-0.536193	-0.0868271	-0.721693	-0.640674	-0.859166	-0.824792	-0.53864	0.685698	0.783617	0.237962	0.431481	0.296464	0.0124043	3.40498	-0.23862	-0.629657	-0.776342
1545	chr1-172766443-172766862	194	chr1-172766443-172766862	420	0		0		intergenic	0	107298	0	-0.536193	-0.0868271	-0.721693	-0.640674	-0.859166	-0.824792	-0.53864	0.685698	0.783617	0.237962	0.431481	0.296464	0.0124043	3.40498	-0.23862	-0.629657	-0.776342
1546	chr1-172818318-172818667	194	chr1-172818318-172818667	350	0		0		intergenic	0	159173	0	-0.536193	-0.0868271	-0.721693	-0.640674	-0.859166	-0.824792	-0.53864	0.685698	0.783617	0.237962	0.431481	0.296464	0.0124043	3.40498	-0.23862	-0.629657	-0.776342
[truncated: 54,969 more rows]

## Sheet: 2_chromvar_females
	NFIL3.MA0025.1	FOXF2.MA0030.1	FOXD1.MA0031.1	IRF2.MA0051.1	MZF1.MA0056.1	MZF1(var.2).MA0057.1	MAX::MYC.MA0059.1	PPARG.MA0066.1	Pax6.MA0069.1	PBX1.MA0070.1	RORA.MA0071.1	RORA(var.2).MA0072.1	RREB1.MA0073.1	RXRA::VDR.MA0074.1	SOX9.MA0077.1	SPIB.MA0081.1	SRY.MA0084.1	TAL1::TCF3.MA0091.1	REL.MA0101.1	RELA.MA0107.1	NR1H2::RXRA.MA0115.1	NFIC::TLX1.MA0119.1	ZNF354C.MA0130.1	CTCF.MA0139.1	EWSR1-FLI1.MA0149.1	REST.MA0138.2	NFATC2.MA0152.1	INSM1.MA0155.1	HOXA5.MA0158.1	RARA::RXRA.MA0159.1	NR4A2.MA0160.1	PLAG1.MA0163.1	ARNT::HIF1A.MA0259.1	BATF::JUN.MA0462.1	CDX2.MA0465.1	DUX4.MA0468.1	E2F4.MA0470.1	E2F6.MA0471.1	FOS.MA0476.1	FOSL1.MA0477.1	FOSL2.MA0478.1	FOXH1.MA0479.1	HNF4G.MA0484.1	JUN.MA0488.1	JUN(var.2).MA0489.1	JUNB.MA0490.1	JUND.MA0491.1	JUND(var.2).MA0492.1	MEF2C.MA0497.1
[truncated: 17 more rows]
[truncated: 1,871 more columns]

[truncated: 2 more sheets: 3_cicero_males, 4_chromvar_males]
