# Supplementary material for: Single-cell roadmap of human gonadal development
Source: Research Square preprint supplement (doi:10.21203/rs.3.rs-496470/v1), 2021-05-21
Supplement: Supplementary file 21 [file f82cc3a6305144f18708821c.xlsx]

## Sheet: 1_macrophages_DEGs_tfidf
gene	cluster	geneFrequency	geneFrequencyOutsideCluster	geneFrequencySecondBest	geneFrequencyGlobal	secondBestClusterName	tfidf	idf	qval
CD28	tissue-repair mac	0.449081	0.140239	0.270423	0.405408	ifn-induced mac	0.405458	0.90286	1.78706e-103
USP36	tissue-repair mac	0.43622	0.160956	0.205634	0.397296	ifn-induced mac	0.402664	0.923074	1.98744e-81
LILRB5	tissue-repair mac	0.534514	0.0884462	0.270423	0.471437	ifn-induced mac	0.401939	0.751971	5.73379e-215
METRNL	tissue-repair mac	0.398294	0.160956	0.222535	0.364732	ifn-induced mac	0.401716	1.00859	1.51777e-62
SLC7A8	tissue-repair mac	0.360236	0.133865	0.155867	0.328225	microglia-like mac	0.401323	1.11405	3.03909e-61
RGL1	tissue-repair mac	0.394619	0.169721	0.298592	0.362817	ifn-induced mac	0.400088	1.01386	6.51342e-56
ABCA1	tissue-repair mac	0.398425	0.176892	0.253521	0.367099	ifn-induced mac	0.399272	1.00212	1.14641e-53
MAN1A1	tissue-repair mac	0.45	0.188845	0.243161	0.41307	SIGLEC15+ mac	0.397862	0.884137	7.73162e-71
LPCAT1	tissue-repair mac	0.345538	0.144223	0.222535	0.31707	ifn-induced mac	0.396896	1.14863	1.09708e-48
CXCL8	tissue-repair mac	0.419948	0.199203	0.304225	0.388732	ifn-induced mac	0.396793	0.944864	2.68596e-51
TFRC	tissue-repair mac	0.395669	0.192829	0.256338	0.366986	ifn-induced mac	0.396631	1.00243	1.9098e-44
NR4A3	tissue-repair mac	0.363123	0.18247	0.24507	0.337577	ifn-induced mac	0.394338	1.08596	8.84526e-37
PYGL	tissue-repair mac	0.367717	0.189641	0.23662	0.342535	ifn-induced mac	0.393964	1.07138	2.62771e-35
WWP1	tissue-repair mac	0.450262	0.215936	0.332394	0.417127	ifn-induced mac	0.393694	0.874365	6.51342e-56
CCL2	tissue-repair mac	0.399475	0.215139	0.315493	0.373408	ifn-induced mac	0.393516	0.985082	6.43893e-36
PER1	tissue-repair mac	0.368766	0.193625	0.23662	0.344	ifn-induced mac	0.393516	1.06711	5.42183e-34
FOXO3	tissue-repair mac	0.424016	0.222311	0.259155	0.395493	ifn-induced mac	0.393326	0.927622	5.51809e-42
HBEGF	tissue-repair mac	0.479921	0.20239	0.264789	0.440676	ifn-induced mac	0.393269	0.819445	8.39876e-78
AP2A2	tissue-repair mac	0.412073	0.222311	0.247887	0.385239	ifn-induced mac	0.393073	0.95389	1.79989e-37
SESN1	tissue-repair mac	0.430052	0.229482	0.312676	0.40169	ifn-induced mac	0.39224	0.912074	3.72854e-41
CD93	tissue-repair mac	0.323097	0.138645	0.259155	0.297014	ifn-induced mac	0.392232	1.21398	1.76196e-42
HES1	tissue-repair mac	0.370604	0.205578	0.278873	0.347268	ifn-induced mac	0.391973	1.05766	8.82915e-30
AGR2	tissue-repair mac	0.47874	0.211952	0.309982	0.441014	microglia-like mac	0.391934	0.818678	1.80726e-71
AFF3	tissue-repair mac	0.329528	0.153785	0.188732	0.304676	ifn-induced mac	0.391646	1.18851	1.87761e-37
OTUD1	tissue-repair mac	0.369423	0.207968	0.28169	0.346592	ifn-induced mac	0.391443	1.05961	1.80862e-28
ITSN1	tissue-repair mac	0.338845	0.173705	0.25228	0.315493	SIGLEC15+ mac	0.390898	1.15362	6.5953e-32
ARRDC3	tissue-repair mac	0.391995	0.232669	0.31831	0.369465	ifn-induced mac	0.390309	0.9957	1.32576e-26
NCF2	tissue-repair mac	0.36916	0.216733	0.329577	0.347606	ifn-induced mac	0.390087	1.05669	3.66874e-25
ZNF331	tissue-repair mac	0.381365	0.230279	0.349296	0.36	ifn-induced mac	0.389622	1.02165	3.52613e-24
MSR1	tissue-repair mac	0.392257	0.238247	0.391549	0.370479	ifn-induced mac	0.389495	0.992959	9.69305e-25
ARL4C	tissue-repair mac	0.319554	0.152191	0.295775	0.295887	ifn-induced mac	0.389145	1.21778	1.64611e-34
IGFBP4	tissue-repair mac	0.297113	0.106773	0.146479	0.270197	ifn-induced mac	0.388803	1.3086	1.54081e-49
COLEC12	tissue-repair mac	0.272703	0.0438247	0.084507	0.240338	ifn-induced mac	0.388796	1.42571	3.10537e-87
AAK1	tissue-repair mac	0.379265	0.238247	0.295775	0.359324	ifn-induced mac	0.38819	1.02353	5.55889e-21
SNX9	tissue-repair mac	0.351706	0.210359	0.261972	0.331718	ifn-induced mac	0.388097	1.10347	3.72066e-22
VEGFA	tissue-repair mac	0.314173	0.153785	0.188732	0.291493	ifn-induced mac	0.387294	1.23274	7.08126e-32
PFKFB3	tissue-repair mac	0.402231	0.258964	0.461972	0.381972	ifn-induced mac	0.38711	0.962408	5.86236e-21
KLF4	tissue-repair mac	0.491601	0.233466	0.380282	0.455099	ifn-induced mac	0.387009	0.787241	1.15933e-65
KDM6B	tissue-repair mac	0.37021	0.243028	0.284507	0.352225	ifn-induced mac	0.386308	1.04348	4.05522e-17
MAP3K8	tissue-repair mac	0.4021	0.264542	0.357746	0.382648	ifn-induced mac	0.386273	0.96064	3.04726e-19
BLVRA	tissue-repair mac	0.367585	0.241434	0.419453	0.349746	SIGLEC15+ mac	0.386166	1.05055	6.65815e-17
CCL4L2	tissue-repair mac	0.367323	0.241434	0.302977	0.349521	microglia-like mac	0.386127	1.05119	7.73513e-17
NFKBIZ	tissue-repair mac	0.420997	0.278088	0.385915	0.400789	ifn-induced mac	0.384927	0.914321	2.33961e-20
PLXND1	tissue-repair mac	0.40748	0.276494	0.416413	0.388958	SIGLEC15+ mac	0.384777	0.944285	3.04968e-17
CSRNP1	tissue-repair mac	0.374803	0.258964	0.304225	0.358423	ifn-induced mac	0.384564	1.02604	5.94748e-14
COLGALT1	tissue-repair mac	0.374934	0.259761	0.315493	0.358648	ifn-induced mac	0.384463	1.02541	8.6845e-14
BCAT1	tissue-repair mac	0.394619	0.275697	0.329577	0.377803	ifn-induced mac	0.384116	0.973383	2.5662e-14
FAM13A	tissue-repair mac	0.351444	0.243028	0.298592	0.336113	ifn-induced mac	0.383182	1.09031	1.2065e-12
GAS6	tissue-repair mac	0.530577	0.214343	0.326761	0.485859	ifn-induced mac	0.38299	0.721837	3.80062e-98
SLC15A3	tissue-repair mac	0.350919	0.248606	0.340845	0.336451	ifn-induced mac	0.382257	1.0893	3.137e-11
MCOLN1	tissue-repair mac	0.468504	0.283665	0.31831	0.442366	ifn-induced mac	0.38212	0.815617	3.61339e-33
CD163L1	tissue-repair mac	0.280709	0.108367	0.261398	0.256338	SIGLEC15+ mac	0.382117	1.36126	9.38216e-42
RAP2B	tissue-repair mac	0.386089	0.285259	0.371831	0.371831	ifn-induced mac	0.381964	0.989316	2.6156e-10
CXCL2	tissue-repair mac	0.277034	0.100398	0.169014	0.252056	ifn-induced mac	0.381781	1.3781	8.7153e-45
TLR4	tissue-repair mac	0.335696	0.230279	0.297723	0.320789	microglia-like mac	0.381677	1.13697	2.73477e-12
NFKBID	tissue-repair mac	0.299344	0.159363	0.183099	0.279549	ifn-induced mac	0.381537	1.27458	1.35569e-24
EPB41L3	tissue-repair mac	0.397244	0.297211	0.459155	0.383099	ifn-induced mac	0.381141	0.959463	5.29675e-10
PRMT9	tissue-repair mac	0.487533	0.278088	0.416901	0.457915	ifn-induced mac	0.380798	0.781071	2.18347e-42
ZFHX3	tissue-repair mac	0.356562	0.268526	0.343257	0.344113	microglia-like mac	0.380375	1.06679	3.74197e-08
ETS2	tissue-repair mac	0.469423	0.294821	0.447887	0.444732	ifn-induced mac	0.380365	0.810283	1.99667e-29
FOSL2	tissue-repair mac	0.427559	0.309163	0.610942	0.410817	SIGLEC15+ mac	0.38036	0.889608	1.17246e-13
CYTH1	tissue-repair mac	0.321916	0.215139	0.261972	0.306817	ifn-induced mac	0.380345	1.1815	5.49413e-13
MYO9B	tissue-repair mac	0.445932	0.308367	0.402817	0.426479	ifn-induced mac	0.38002	0.852192	2.56295e-18
ST3GAL1	tissue-repair mac	0.324934	0.223108	0.28169	0.310535	ifn-induced mac	0.379997	1.16946	1.09713e-11
SH2B3	tissue-repair mac	0.432283	0.311554	0.357746	0.415211	ifn-induced mac	0.379963	0.878968	3.83246e-14
AC004687.1	tissue-repair mac	0.326247	0.226295	0.270423	0.312113	ifn-induced mac	0.379879	1.16439	3.22799e-11
RAB3IL1	tissue-repair mac	0.299738	0.172908	0.2662	0.281803	microglia-like mac	0.379632	1.26655	7.72438e-20
ADA2	tissue-repair mac	0.34357	0.256574	0.535211	0.331268	ifn-induced mac	0.379586	1.10483	3.91281e-08
PRNP	tissue-repair mac	0.406037	0.313944	0.380282	0.393014	ifn-induced mac	0.379202	0.93391	2.32987e-08
NENF	tissue-repair mac	0.383596	0.302789	0.391549	0.372169	ifn-induced mac	0.379149	0.988407	1.40204e-06
RANBP2	tissue-repair mac	0.404462	0.317131	0.386018	0.392113	SIGLEC15+ mac	0.37866	0.936206	1.57724e-07
CMTM7	tissue-repair mac	0.385433	0.30757	0.369014	0.374423	ifn-induced mac	0.378638	0.98237	4.25622e-06
CD302	tissue-repair mac	0.351444	0.277291	0.394366	0.340958	ifn-induced mac	0.378152	1.076	8.49824e-06
SLC2A3	tissue-repair mac	0.395407	0.317131	0.409807	0.384338	microglia-like mac	0.378101	0.956233	4.32211e-06
SOCS3	tissue-repair mac	0.297244	0.178486	0.35493	0.280451	ifn-induced mac	0.377903	1.27136	2.606e-17
HEXA	tissue-repair mac	0.409449	0.324303	0.369014	0.397408	ifn-induced mac	0.377836	0.922791	4.15157e-07
NABP1	tissue-repair mac	0.382415	0.312351	0.391549	0.372507	ifn-induced mac	0.377634	0.987499	5.92718e-05
LILRB2	tissue-repair mac	0.394751	0.320319	0.569014	0.384225	ifn-induced mac	0.377589	0.956526	1.65575e-05
YPEL3	tissue-repair mac	0.354593	0.285259	0.343662	0.344789	ifn-induced mac	0.377579	1.06482	4.87923e-05
PDE4B	tissue-repair mac	0.317848	0.227092	0.371831	0.305014	ifn-induced mac	0.377412	1.1874	2.48257e-09
IQGAP2	tissue-repair mac	0.500394	0.288446	0.459155	0.470423	ifn-induced mac	0.377359	0.754124	4.96873e-43
RBMS1	tissue-repair mac	0.368635	0.303586	0.321127	0.359437	ifn-induced mac	0.377194	1.02322	0.000245517
MTSS1	tissue-repair mac	0.438058	0.32988	0.598784	0.422761	SIGLEC15+ mac	0.377146	0.860949	2.9944e-11
SFMBT2	tissue-repair mac	0.375459	0.310757	0.436077	0.36631	microglia-like mac	0.377065	1.00428	0.000299743
SIGLEC1	tissue-repair mac	0.259449	0.0788845	0.214085	0.233915	ifn-induced mac	0.376926	1.4528	7.37794e-51
DNM2	tissue-repair mac	0.341207	0.2749	0.31307	0.331831	SIGLEC15+ mac	0.376396	1.10313	0.00010537
RASGEF1B	tissue-repair mac	0.288451	0.166534	0.233803	0.271211	ifn-induced mac	0.376388	1.30486	8.64612e-19
RBM47	tissue-repair mac	0.406824	0.334661	0.419453	0.39662	SIGLEC15+ mac	0.376222	0.924777	4.12487e-05
CCL3L1	tissue-repair mac	0.322703	0.245418	0.360771	0.311775	microglia-like mac	0.376103	1.16547	1.25919e-06
DMXL2	tissue-repair mac	0.304987	0.210359	0.402817	0.291606	ifn-induced mac	0.375851	1.23235	1.77808e-10
YBX3	tissue-repair mac	0.409449	0.338645	0.525836	0.399437	SIGLEC15+ mac	0.375751	0.9177	6.56891e-05
ITM2C	tissue-repair mac	0.41063	0.339442	0.488616	0.400563	microglia-like mac	0.375678	0.914883	5.88501e-05
ANKRD9	tissue-repair mac	0.258399	0.0836653	0.121127	0.23369	ifn-induced mac	0.37565	1.45376	3.3831e-47
RBKS	tissue-repair mac	0.327034	0.257371	0.357746	0.317183	ifn-induced mac	0.375525	1.14828	2.48418e-05
SLC9A9	tissue-repair mac	0.423097	0.342629	0.411268	0.411718	ifn-induced mac	0.375463	0.887416	2.93011e-06
AP1S2	tissue-repair mac	0.353806	0.299602	0.433803	0.346141	ifn-induced mac	0.375356	1.06091	0.00454107
MARCH1	tissue-repair mac	0.356168	0.302789	0.459155	0.34862	ifn-induced mac	0.37532	1.05377	0.0058055
EPS15	tissue-repair mac	0.30105	0.206375	0.264438	0.287662	SIGLEC15+ mac	0.375099	1.24597	1.38361e-10
GNA13	tissue-repair mac	0.435827	0.345817	0.4	0.423099	ifn-induced mac	0.374876	0.86015	9.17615e-08
LRP1	tissue-repair mac	0.449869	0.342629	0.428571	0.434704	SIGLEC15+ mac	0.374781	0.833089	5.97382e-11
CXCL9	ifn-induced mac	0.470423	0.0172535	0.0191601	0.0353803	tissue-repair mac	1.57196	3.3416	4.98086e-158
CXCL10	ifn-induced mac	0.535211	0.0474178	0.0506562	0.0669296	tissue-repair mac	1.44727	2.70411	6.14358e-132
CXCL11	ifn-induced mac	0.329577	0.00504695	0.00564304	0.0180282	tissue-repair mac	1.32352	4.01582	1.37344e-130
GBP1	ifn-induced mac	0.588732	0.0856808	0.0931759	0.105803	tissue-repair mac	1.3224	2.24618	4.07978e-113
GBP4	ifn-induced mac	0.498592	0.0798122	0.0851706	0.0965634	tissue-repair mac	1.16549	2.33756	2.67364e-85
GBP5	ifn-induced mac	0.352113	0.0289906	0.0317585	0.0419155	tissue-repair mac	1.11694	3.1721	2.03822e-83
WARS	ifn-induced mac	0.574648	0.12723	0.261398	0.145127	SIGLEC15+ mac	1.10916	1.93015	1.31298e-79
IL4I1	ifn-induced mac	0.64507	0.16338	0.170341	0.182648	tissue-repair mac	1.09675	1.7002	4.96412e-83
SLAMF8	ifn-induced mac	0.470423	0.0974178	0.105118	0.112338	tissue-repair mac	1.02846	2.18624	1.15545e-64
TAP1	ifn-induced mac	0.498592	0.11338	0.206687	0.128789	SIGLEC15+ mac	1.0219	2.04958	4.22634e-64
GBP2	ifn-induced mac	0.521127	0.1277	0.331307	0.143437	SIGLEC15+ mac	1.01196	1.94186	2.6761e-63
MT2A	ifn-induced mac	0.715493	0.246009	0.367776	0.264789	microglia-like mac	0.950764	1.32882	5.15751e-70
VAMP5	ifn-induced mac	0.630986	0.208451	0.217323	0.225352	tissue-repair mac	0.940227	1.49009	8.49174e-60
IFITM1	ifn-induced mac	0.357746	0.061385	0.0998249	0.0732394	microglia-like mac	0.935157	2.61402	4.8845e-54
STAT1	ifn-induced mac	0.785915	0.292488	0.301575	0.312225	tissue-repair mac	0.914829	1.16403	3.21527e-75
RARRES3	ifn-induced mac	0.661972	0.235563	0.243963	0.25262	tissue-repair mac	0.910787	1.37587	1.20568e-58
TNFSF10	ifn-induced mac	0.388732	0.0852113	0.157618	0.0973521	microglia-like mac	0.905521	2.32942	2.40829e-48
APOL3	ifn-induced mac	0.290141	0.0414319	0.0790274	0.0513803	SIGLEC15+ mac	0.861283	2.9685	1.53536e-48
IL32	ifn-induced mac	0.304225	0.0496479	0.200608	0.059831	SIGLEC15+ mac	0.856769	2.81623	1.75733e-46
PSMB9	ifn-induced mac	0.738028	0.299531	0.41331	0.31707	microglia-like mac	0.847722	1.14863	8.02916e-59
SERPINA1	ifn-induced mac	0.35493	0.0856808	0.343257	0.0964507	microglia-like mac	0.830082	2.33872	2.62026e-39
HLA-DQA1	ifn-induced mac	0.923944	0.388028	0.449848	0.409465	SIGLEC15+ mac	0.824993	0.892904	1.84103e-93
TNFSF13B	ifn-induced mac	0.650704	0.272418	0.313485	0.287549	microglia-like mac	0.811012	1.24636	1.52454e-44
HLA-F	ifn-induced mac	0.425352	0.147653	0.154331	0.158761	tissue-repair mac	0.7828	1.84036	9.84145e-32
HLA-DOA	ifn-induced mac	0.397183	0.129812	0.141856	0.140507	microglia-like mac	0.779471	1.9625	1.36653e-31
SERPING1	ifn-induced mac	0.543662	0.230164	0.243438	0.242704	tissue-repair mac	0.769777	1.41591	1.20293e-32
HLA-DQA2	ifn-induced mac	0.707042	0.323239	0.489362	0.338592	SIGLEC15+ mac	0.765699	1.08296	2.36114e-44
EPSTI1	ifn-induced mac	0.549296	0.237559	0.330998	0.250028	microglia-like mac	0.761424	1.38618	6.20045e-32
HLA-DQB1	ifn-induced mac	0.884507	0.405869	0.412598	0.425014	tissue-repair mac	0.756813	0.855633	1.36361e-72
CD38	ifn-induced mac	0.287324	0.0660798	0.0713911	0.0749296	tissue-repair mac	0.744516	2.59121	3.88628e-32
CAMK2D	ifn-induced mac	0.383099	0.138498	0.287215	0.148282	microglia-like mac	0.731198	1.90864	5.17098e-26
FCGR3A	ifn-induced mac	0.55493	0.260211	0.639229	0.272	microglia-like mac	0.722492	1.30195	1.04431e-27
CIITA	ifn-induced mac	0.453521	0.193662	0.200525	0.204056	tissue-repair mac	0.720808	1.58936	1.19234e-24
PSMB8	ifn-induced mac	0.622535	0.301878	0.595745	0.314704	SIGLEC15+ mac	0.719727	1.15612	2.49215e-31
EBI3	ifn-induced mac	0.495775	0.224061	0.234383	0.23493	tissue-repair mac	0.718114	1.44847	3.952e-25
PPA1	ifn-induced mac	0.402817	0.160094	0.674772	0.169803	SIGLEC15+ mac	0.714242	1.77312	7.6826e-24
PEA15	ifn-induced mac	0.478873	0.214554	0.464098	0.225127	microglia-like mac	0.714044	1.49109	2.58921e-24
CD40	ifn-induced mac	0.43662	0.184859	0.288967	0.19493	microglia-like mac	0.713924	1.63512	9.14799e-24
SCPEP1	ifn-induced mac	0.521127	0.245188	0.430823	0.256225	microglia-like mac	0.709617	1.3617	5.84899e-25
IGFLR1	ifn-induced mac	0.414085	0.173474	0.241681	0.183099	microglia-like mac	0.703004	1.69773	1.51467e-22
LY6E	ifn-induced mac	0.439437	0.192371	0.212766	0.202254	SIGLEC15+ mac	0.702322	1.59823	1.58665e-22
C1orf54	ifn-induced mac	0.352113	0.128991	0.24924	0.137915	SIGLEC15+ mac	0.697575	1.98111	6.57074e-23
SP110	ifn-induced mac	0.414085	0.179577	0.234676	0.188958	microglia-like mac	0.689961	1.66623	4.01259e-21
ATF5	ifn-induced mac	0.630986	0.324883	0.37386	0.337127	SIGLEC15+ mac	0.686069	1.0873	4.85429e-28
UBE2L6	ifn-induced mac	0.715493	0.369601	0.534151	0.383437	microglia-like mac	0.685858	0.958581	2.19379e-35
SNX10	ifn-induced mac	0.495775	0.241197	0.708207	0.25138	SIGLEC15+ mac	0.68456	1.38079	1.5226e-21
SMCO4	ifn-induced mac	0.369014	0.148239	0.413374	0.15707	SIGLEC15+ mac	0.683068	1.85106	7.30435e-21
GCH1	ifn-induced mac	0.253521	0.0603286	0.0753065	0.0680563	microglia-like mac	0.681318	2.68742	7.83617e-27
TMEM176A	ifn-induced mac	0.453521	0.216901	0.525836	0.226366	SIGLEC15+ mac	0.673752	1.4856	1.24889e-19
CLEC10A	ifn-induced mac	0.256338	0.0650235	0.069685	0.0726761	tissue-repair mac	0.672053	2.62174	2.2655e-25
VOPP1	ifn-induced mac	0.405634	0.18216	0.358663	0.191099	SIGLEC15+ mac	0.67131	1.65497	3.57241e-19
IFI35	ifn-induced mac	0.405634	0.184038	0.237082	0.192901	SIGLEC15+ mac	0.667501	1.64558	9.04148e-19
BCL2A1	ifn-induced mac	0.397183	0.178991	0.227671	0.187718	microglia-like mac	0.664413	1.67281	1.71208e-18
IRF1	ifn-induced mac	0.532394	0.277347	0.334347	0.287549	SIGLEC15+ mac	0.663556	1.24636	1.67252e-20
PILRA	ifn-induced mac	0.51831	0.268427	0.462006	0.278423	SIGLEC15+ mac	0.662719	1.27862	6.28331e-20
JAML	ifn-induced mac	0.416901	0.196714	0.234043	0.205521	SIGLEC15+ mac	0.659624	1.58221	6.11108e-18
VCAM1	ifn-induced mac	0.256338	0.0696009	0.0746719	0.0770704	tissue-repair mac	0.657004	2.56304	1.72712e-23
NCF1	ifn-induced mac	0.647887	0.351761	0.443769	0.363606	SIGLEC15+ mac	0.655458	1.01169	6.95838e-26
CTSH	ifn-induced mac	0.735211	0.398239	0.616462	0.411718	microglia-like mac	0.652438	0.887416	1.47436e-33
SAMD9L	ifn-induced mac	0.239437	0.0585681	0.1331	0.0658028	microglia-like mac	0.651529	2.72109	1.98396e-24
GIMAP7	ifn-induced mac	0.292958	0.101526	0.105906	0.109183	tissue-repair mac	0.648822	2.21473	6.91465e-20
TIFAB	ifn-induced mac	0.214085	0.0414319	0.0516717	0.048338	SIGLEC15+ mac	0.648577	3.02954	4.44586e-27
TMEM176B	ifn-induced mac	0.557746	0.303638	0.613982	0.313803	SIGLEC15+ mac	0.646423	1.15899	9.28086e-20
SECTM1	ifn-induced mac	0.394366	0.188967	0.201181	0.197183	tissue-repair mac	0.640302	1.62362	4.79404e-16
IFI6	ifn-induced mac	0.383099	0.181573	0.203152	0.189634	microglia-like mac	0.636963	1.66266	8.1877e-16
SCIMP	ifn-induced mac	0.422535	0.213967	0.224147	0.22231	tissue-repair mac	0.635359	1.50368	1.59425e-15
NAAA	ifn-induced mac	0.374648	0.180634	0.334347	0.188394	SIGLEC15+ mac	0.625369	1.66922	9.20374e-15
CD72	ifn-induced mac	0.228169	0.0579812	0.0616798	0.0647887	tissue-repair mac	0.624413	2.73662	3.41929e-22
TMEM109	ifn-induced mac	0.374648	0.181221	0.458967	0.188958	SIGLEC15+ mac	0.62425	1.66623	1.17117e-14
IFIT3	ifn-induced mac	0.2	0.0382629	0.0490368	0.0447324	microglia-like mac	0.621411	3.10706	2.2655e-25
CD1D	ifn-induced mac	0.270423	0.0950704	0.189142	0.102085	microglia-like mac	0.617092	2.28195	1.1363e-17
AOAH	ifn-induced mac	0.492958	0.2777	0.287139	0.28631	tissue-repair mac	0.616533	1.25068	1.05866e-14
SLAMF7	ifn-induced mac	0.146479	0.00938967	0.0607903	0.0148732	SIGLEC15+ mac	0.616411	4.20819	5.25186e-36
ODF3B	ifn-induced mac	0.397183	0.204812	0.297872	0.212507	SIGLEC15+ mac	0.615149	1.54878	1.29924e-13
ISG15	ifn-induced mac	0.467606	0.260094	0.30648	0.268394	microglia-like mac	0.615041	1.3153	4.63399e-14
NMI	ifn-induced mac	0.383099	0.193662	0.452888	0.201239	SIGLEC15+ mac	0.614207	1.60326	1.29924e-13
MNDA	ifn-induced mac	0.419718	0.224765	0.467601	0.232563	microglia-like mac	0.612198	1.45859	2.45541e-13
P2RY6	ifn-induced mac	0.332394	0.151291	0.155512	0.158535	tissue-repair mac	0.612197	1.84178	2.56322e-14
LILRB1	ifn-induced mac	0.371831	0.186268	0.24924	0.19369	SIGLEC15+ mac	0.610359	1.6415	2.28292e-13
UVRAG	ifn-induced mac	0.402817	0.213732	0.232925	0.221296	microglia-like mac	0.607551	1.50826	6.61835e-13
MTHFD2	ifn-induced mac	0.490141	0.281221	0.641337	0.289577	SIGLEC15+ mac	0.607447	1.23933	8.26095e-14
CBR1	ifn-induced mac	0.323944	0.147183	0.220665	0.154254	microglia-like mac	0.605502	1.86916	6.54471e-14
DHRS9	ifn-induced mac	0.312676	0.137793	0.313485	0.144789	microglia-like mac	0.60424	1.93248	3.65261e-14
PSMB10	ifn-induced mac	0.732394	0.426526	0.671733	0.438761	SIGLEC15+ mac	0.603348	0.823801	1.4956e-27
SLC8A1	ifn-induced mac	0.388732	0.205399	0.345009	0.212732	microglia-like mac	0.601649	1.54772	2.03476e-12
LIMD2	ifn-induced mac	0.656338	0.389202	0.781155	0.399887	SIGLEC15+ mac	0.601581	0.916572	8.35292e-21
UBE2D1	ifn-induced mac	0.346479	0.169601	0.343465	0.176676	SIGLEC15+ mac	0.600599	1.73344	7.07662e-13
TAPBP	ifn-induced mac	0.616901	0.367958	0.544073	0.377915	SIGLEC15+ mac	0.600297	0.973085	3.88837e-18
PLA2G16	ifn-induced mac	0.346479	0.170775	0.257443	0.177803	microglia-like mac	0.598397	1.72708	1.15363e-12
LYZ	ifn-induced mac	0.442254	0.251291	0.702128	0.25893	SIGLEC15+ mac	0.597573	1.3512	3.57347e-12
CD44	ifn-induced mac	0.397183	0.215258	0.741641	0.222535	SIGLEC15+ mac	0.596835	1.50267	5.97315e-12
PSME2	ifn-induced mac	0.876056	0.491667	0.696049	0.507042	SIGLEC15+ mac	0.594983	0.679161	5.56951e-48
PSMA4	ifn-induced mac	0.546479	0.328991	0.729483	0.33769	SIGLEC15+ mac	0.593272	1.08563	3.6147e-14
ADA2	ifn-induced mac	0.535211	0.32277	0.34357	0.331268	tissue-repair mac	0.591317	1.10483	1.29933e-13
IFI44L	ifn-induced mac	0.205634	0.0503521	0.0538058	0.0565634	tissue-repair mac	0.590661	2.87239	1.47108e-20
GIMAP4	ifn-induced mac	0.687324	0.413732	0.61296	0.424676	microglia-like mac	0.588644	0.856429	7.90115e-22
DYNLT1	ifn-induced mac	0.6	0.36831	0.638298	0.377577	SIGLEC15+ mac	0.584388	0.97398	1.11761e-15
ATG3	ifn-induced mac	0.543662	0.333568	0.620061	0.341972	SIGLEC15+ mac	0.583364	1.07303	3.38518e-13
TRIM22	ifn-induced mac	0.295775	0.133216	0.229422	0.139718	microglia-like mac	0.582122	1.96813	1.18017e-12
TNFAIP8	ifn-induced mac	0.495775	0.302347	0.56535	0.310085	SIGLEC15+ mac	0.580508	1.17091	1.4401e-11
OLFML3	microglia-like mac	0.723292	0.045159	0.056338	0.0887887	ifn-induced mac	1.75145	2.4215	0
C3	microglia-like mac	0.742557	0.0657514	0.146479	0.109296	ifn-induced mac	1.6438	2.2137	9.24172e-312
HTRA1	microglia-like mac	0.486865	0.01421	0.0150919	0.0446197	tissue-repair mac	1.51395	3.10958	2.77562e-260
P2RY12	microglia-like mac	0.779335	0.100554	0.126761	0.144225	ifn-induced mac	1.50909	1.93638	1.41259e-280
AP003481.1	microglia-like mac	0.483363	0.0187861	0.0195538	0.0486761	tissue-repair mac	1.461	3.02257	3.90534e-240
CAPG	microglia-like mac	0.728546	0.161248	0.835866	0.197746	SIGLEC15+ mac	1.18081	1.62077	4.86583e-177
GAL3ST4	microglia-like mac	0.600701	0.108622	0.11378	0.140282	tissue-repair mac	1.17984	1.9641	2.25713e-155
TREM2	microglia-like mac	0.833625	0.217365	0.264789	0.257014	ifn-induced mac	1.13258	1.35862	3.12875e-195
BHLHE41	microglia-like mac	0.495622	0.0840559	0.107042	0.110535	ifn-induced mac	1.09157	2.20242	5.48716e-126
CX3CR1	microglia-like mac	0.765324	0.204841	0.25228	0.240901	SIGLEC15+ mac	1.08934	1.42337	7.28551e-163
CKB	microglia-like mac	0.443082	0.0638247	0.705167	0.0882254	SIGLEC15+ mac	1.07574	2.42786	1.47872e-122
DNASE2	microglia-like mac	0.357268	0.0496146	0.0704225	0.0694085	ifn-induced mac	0.9531	2.66775	6.31643e-97
C12orf75	microglia-like mac	0.420315	0.0874277	0.0901575	0.108845	tissue-repair mac	0.932188	2.21783	7.01065e-87
P2RY13	microglia-like mac	0.57268	0.173772	0.267606	0.199437	ifn-induced mac	0.923308	1.61226	1.01652e-89
ACY3	microglia-like mac	0.49387	0.14475	0.154068	0.167211	tissue-repair mac	0.883286	1.7885	7.21492e-76
OLR1	microglia-like mac	0.345009	0.0714114	0.0738845	0.0890141	tissue-repair mac	0.834563	2.41896	1.29856e-68
FCGR3A	microglia-like mac	0.639229	0.246749	0.55493	0.272	ifn-induced mac	0.832247	1.30195	1.86247e-77
STK17A	microglia-like mac	0.380035	0.100193	0.173252	0.118197	SIGLEC15+ mac	0.811527	2.1354	7.63241e-61
SERPINA1	microglia-like mac	0.343257	0.0794798	0.35493	0.0964507	ifn-induced mac	0.802784	2.33872	1.91501e-61
ENTPD1	microglia-like mac	0.534151	0.201108	0.31831	0.222535	ifn-induced mac	0.802652	1.50267	8.42411e-61
CSF3R	microglia-like mac	0.458844	0.155949	0.24507	0.175437	ifn-induced mac	0.798608	1.74048	5.87309e-57
APOC2	microglia-like mac	0.231173	0.0192678	0.0253521	0.0329014	ifn-induced mac	0.789281	3.41424	4.18867e-79
MMP2	microglia-like mac	0.231173	0.0193882	0.0203412	0.0330141	tissue-repair mac	0.788491	3.41082	6.83414e-79
CD69	microglia-like mac	0.394046	0.119099	0.149296	0.136789	ifn-induced mac	0.783882	1.98932	2.12151e-54
ADORA3	microglia-like mac	0.474606	0.178107	0.264789	0.197183	ifn-induced mac	0.770581	1.62362	1.24822e-51
PIH1D1	microglia-like mac	0.604203	0.263728	0.50152	0.285634	SIGLEC15+ mac	0.757094	1.25304	9.26576e-58
LIMS1	microglia-like mac	0.61296	0.270111	0.857143	0.292169	SIGLEC15+ mac	0.7542	1.23042	3.87223e-58
SORL1	microglia-like mac	0.362522	0.112115	0.230986	0.128225	ifn-induced mac	0.744608	2.05397	1.46247e-47
TMEM119	microglia-like mac	0.250438	0.0386561	0.0790274	0.0522817	SIGLEC15+ mac	0.739069	2.95111	3.93188e-60
GNG7	microglia-like mac	0.437828	0.168232	0.173753	0.185577	tissue-repair mac	0.737427	1.68428	1.68322e-44
S100A4	microglia-like mac	0.647986	0.297929	0.978723	0.320451	SIGLEC15+ mac	0.737425	1.13803	4.41147e-59
SERPINF1	microglia-like mac	0.52014	0.223988	0.768997	0.243042	SIGLEC15+ mac	0.735749	1.41452	8.22986e-47
SELPLG	microglia-like mac	0.58669	0.265896	0.513678	0.286535	SIGLEC15+ mac	0.7333	1.24989	2.3006e-51
SIGLEC10	microglia-like mac	0.30648	0.0774326	0.138028	0.092169	ifn-induced mac	0.730688	2.38413	3.61931e-49
PLXDC2	microglia-like mac	0.690018	0.326469	0.360563	0.349859	ifn-induced mac	0.724673	1.05022	1.24196e-62
ADAM28	microglia-like mac	0.425569	0.169075	0.37386	0.185577	SIGLEC15+ mac	0.716779	1.68428	1.61915e-40
FCGR1A	microglia-like mac	0.597198	0.281551	0.467606	0.301859	ifn-induced mac	0.715321	1.19779	6.12534e-49
TM6SF1	microglia-like mac	0.371278	0.131382	0.169014	0.146817	ifn-induced mac	0.712323	1.91857	1.12244e-40
LINC01736	microglia-like mac	0.162872	0.00276975	0.00303951	0.0130704	SIGLEC15+ mac	0.706442	4.3374	5.78416e-88
APBB1IP	microglia-like mac	0.690018	0.3408	0.537994	0.363268	SIGLEC15+ mac	0.698722	1.01262	1.44101e-57
LILRB4	microglia-like mac	0.423818	0.177264	0.370821	0.193127	SIGLEC15+ mac	0.69693	1.64441	7.54848e-37
PEA15	microglia-like mac	0.464098	0.208695	0.478873	0.225127	ifn-induced mac	0.692013	1.49109	1.74072e-36
ALDH2	microglia-like mac	0.362522	0.135718	0.306991	0.15031	SIGLEC15+ mac	0.686999	1.89506	3.33994e-36
SYT6	microglia-like mac	0.194396	0.0180636	0.0194226	0.0294085	tissue-repair mac	0.685532	3.52647	3.90373e-62
MARCH3	microglia-like mac	0.208406	0.0258911	0.0422535	0.0376338	ifn-induced mac	0.683542	3.27985	6.47341e-57
S100A6	microglia-like mac	0.434326	0.191835	0.744681	0.207437	SIGLEC15+ mac	0.683164	1.57293	1.95204e-34
MNDA	microglia-like mac	0.467601	0.216402	0.419718	0.232563	ifn-induced mac	0.682039	1.45859	8.30319e-35
ADGRG1	microglia-like mac	0.187391	0.0156551	0.0166667	0.0267042	tissue-repair mac	0.678903	3.62293	6.03163e-63
SNCA	microglia-like mac	0.362522	0.139451	0.157746	0.153803	ifn-induced mac	0.678671	1.87208	1.19609e-34
GNB4	microglia-like mac	0.551664	0.277577	0.343465	0.295211	SIGLEC15+ mac	0.673065	1.22006	2.44092e-37
LGALS1	microglia-like mac	0.71979	0.371387	0.966565	0.393803	SIGLEC15+ mac	0.670776	0.931905	5.29425e-57
LILRA2	microglia-like mac	0.274956	0.0771917	0.0873239	0.0899155	ifn-induced mac	0.662338	2.40889	2.12093e-38
SALL1	microglia-like mac	0.145359	0.00156551	0.0056338	0.0108169	ifn-induced mac	0.657989	4.52665	1.21639e-83
SKIL	microglia-like mac	0.362522	0.149326	0.157746	0.163042	ifn-induced mac	0.657523	1.81375	7.892e-31
NUDT14	microglia-like mac	0.371278	0.157996	0.294833	0.171718	SIGLEC15+ mac	0.654155	1.7619	5.78353e-30
NAA20	microglia-like mac	0.611208	0.32948	0.650456	0.347606	SIGLEC15+ mac	0.645856	1.05669	1.25978e-37
BLNK	microglia-like mac	0.425569	0.206407	0.335211	0.220507	ifn-induced mac	0.643386	1.51183	1.33647e-27
TLR10	microglia-like mac	0.245184	0.0614162	0.101408	0.0732394	ifn-induced mac	0.640916	2.61402	2.74934e-38
SUCNR1	microglia-like mac	0.234676	0.0537091	0.428571	0.0653521	SIGLEC15+ mac	0.640188	2.72797	5.22827e-40
GPN3	microglia-like mac	0.420315	0.207129	0.328267	0.220845	SIGLEC15+ mac	0.6348	1.51029	3.4328e-26
PROCR	microglia-like mac	0.176883	0.0174615	0.133739	0.0277183	SIGLEC15+ mac	0.634241	3.58566	1.76018e-54
SLC29A1	microglia-like mac	0.388792	0.182442	0.537994	0.195718	SIGLEC15+ mac	0.63415	1.63108	3.1052e-26
GPX7	microglia-like mac	0.30648	0.114644	0.261398	0.126986	SIGLEC15+ mac	0.632476	2.06368	1.85261e-29
RGS16	microglia-like mac	0.287215	0.100313	0.130699	0.112338	SIGLEC15+ mac	0.627923	2.18624	2.88236e-30
NDRG2	microglia-like mac	0.309982	0.120183	0.200608	0.132394	SIGLEC15+ mac	0.626775	2.02197	3.58178e-28
LPCAT2	microglia-like mac	0.353765	0.158237	0.290141	0.170817	ifn-induced mac	0.625161	1.76716	1.25548e-25
PCED1B	microglia-like mac	0.255692	0.0751445	0.104225	0.0867606	ifn-induced mac	0.625065	2.4446	2.15426e-33
SVBP	microglia-like mac	0.486865	0.262885	0.49848	0.277296	SIGLEC15+ mac	0.624488	1.28267	6.59566e-26
LPAR5	microglia-like mac	0.446585	0.233743	0.407295	0.247437	SIGLEC15+ mac	0.623701	1.3966	9.96253e-25
LHFPL2	microglia-like mac	0.294221	0.108261	0.164134	0.120225	SIGLEC15+ mac	0.623273	2.11839	8.9644e-29
UBE2N	microglia-like mac	0.54641	0.30407	0.541033	0.319662	SIGLEC15+ mac	0.623176	1.14049	1.28736e-28
ALOX5	microglia-like mac	0.257443	0.0780347	0.211268	0.0895775	ifn-induced mac	0.62112	2.41265	2.28944e-32
SYNDIG1	microglia-like mac	0.134851	0.00144509	0.0015748	0.0100282	tissue-repair mac	0.620633	4.60236	1.97405e-77
APOE	microglia-like mac	0.651489	0.36922	0.857143	0.38738	SIGLEC15+ mac	0.617838	0.948348	4.06547e-37
LPXN	microglia-like mac	0.308231	0.124639	0.300912	0.136451	SIGLEC15+ mac	0.613932	1.99179	4.72827e-26
SMIM29	microglia-like mac	0.394046	0.198218	0.28169	0.210817	ifn-induced mac	0.613436	1.55677	7.17053e-23
PDPN	microglia-like mac	0.14711	0.00674374	0.0140845	0.0157746	ifn-induced mac	0.610412	4.14935	4.99306e-62
PTGS1	microglia-like mac	0.243433	0.0706888	0.191489	0.0818028	SIGLEC15+ mac	0.60942	2.50344	4.92861e-32
COX20	microglia-like mac	0.499124	0.282635	0.674772	0.296563	SIGLEC15+ mac	0.606683	1.21549	1.24137e-23
DHRS9	microglia-like mac	0.313485	0.133189	0.312676	0.144789	ifn-induced mac	0.605804	1.93248	2.48812e-24
CD48	microglia-like mac	0.290718	0.113439	0.343465	0.124845	SIGLEC15+ mac	0.604892	2.08068	8.13862e-26
MRPS28	microglia-like mac	0.348511	0.164619	0.395137	0.176451	SIGLEC15+ mac	0.604567	1.73471	1.85661e-22
ICAM3	microglia-like mac	0.222417	0.0552746	0.0942249	0.0660282	SIGLEC15+ mac	0.604456	2.71767	1.32468e-34
IGF1	microglia-like mac	0.502627	0.28685	0.304199	0.300732	tissue-repair mac	0.603924	1.20153	2.32053e-23
LAT2	microglia-like mac	0.567426	0.331647	0.528875	0.346817	SIGLEC15+ mac	0.60088	1.05896	1.63871e-26
CD37	microglia-like mac	0.796848	0.449061	0.647887	0.471437	ifn-induced mac	0.599206	0.751971	3.02521e-58
IVD	microglia-like mac	0.33275	0.155347	0.234043	0.166761	SIGLEC15+ mac	0.59602	1.7912	1.02843e-21
PLAC8	microglia-like mac	0.190893	0.03408	0.0638298	0.044169	SIGLEC15+ mac	0.595535	3.11973	7.82456e-40
CKLF	microglia-like mac	0.525394	0.308526	0.866261	0.322479	SIGLEC15+ mac	0.594598	1.13172	5.08455e-23
MRC2	microglia-like mac	0.155867	0.0130058	0.0478873	0.0221972	ifn-induced mac	0.593508	3.80779	7.09368e-52
CDC123	microglia-like mac	0.41331	0.226156	0.607903	0.238197	SIGLEC15+ mac	0.592958	1.43466	1.01199e-19
ELOVL5	microglia-like mac	0.343257	0.166787	0.285714	0.178141	SIGLEC15+ mac	0.592181	1.72518	1.12165e-20
APOC1	microglia-like mac	0.525394	0.310694	0.835866	0.324507	SIGLEC15+ mac	0.591304	1.12545	1.53604e-22
AC098613.1	microglia-like mac	0.339755	0.165462	0.259155	0.176676	ifn-induced mac	0.588944	1.73344	2.68228e-20
SCPEP1	microglia-like mac	0.430823	0.24422	0.521127	0.256225	ifn-induced mac	0.586651	1.3617	6.3271e-19
LSP1	microglia-like mac	0.583187	0.350795	0.512676	0.365746	ifn-induced mac	0.586579	1.00581	1.75904e-25
S100A13	microglia-like mac	0.299475	0.130419	0.148936	0.141296	SIGLEC15+ mac	0.586042	1.9569	5.95517e-22
ABI3	microglia-like mac	0.392294	0.21303	0.607903	0.224563	SIGLEC15+ mac	0.58593	1.4936	9.7968e-19
PALD1	microglia-like mac	0.250438	0.0863439	0.118541	0.0969014	SIGLEC15+ mac	0.584537	2.33406	2.68897e-26
PLP2	microglia-like mac	0.302977	0.134754	0.793313	0.145577	SIGLEC15+ mac	0.583851	1.92705	2.33552e-21
ANPEP	SIGLEC15+ mac	0.969605	0.00830798	0.0676056	0.0439437	ifn-induced mac	3.02987	3.12485	0
CTSK	SIGLEC15+ mac	0.796353	0.0106483	0.0175131	0.0397746	microglia-like mac	2.56786	3.22453	0
SIGLEC15	SIGLEC15+ mac	0.68997	0.00292535	0.00314961	0.0283944	tissue-repair mac	2.45737	3.56156	0
PARM1	SIGLEC15+ mac	0.659574	0.00362743	0.0084507	0.0279437	ifn-induced mac	2.35967	3.57756	1.5194e-308
ATP6V0D2	SIGLEC15+ mac	0.659574	0.00772291	0.00853018	0.0318873	tissue-repair mac	2.27259	3.44555	7.0229e-283
COL6A1	SIGLEC15+ mac	0.793313	0.0356892	0.0375328	0.0637746	tissue-repair mac	2.18351	2.7524	2.48874e-268
COL6A2	SIGLEC15+ mac	0.81155	0.0395507	0.0619718	0.068169	ifn-induced mac	2.17963	2.68577	2.41976e-270
ACP5	SIGLEC15+ mac	0.951368	0.076644	0.140845	0.10907	ifn-induced mac	2.108	2.21576	3.01204e-294
RUFY4	SIGLEC15+ mac	0.574468	0.00585069	0.0140845	0.0269296	ifn-induced mac	2.07643	3.61453	4.59793e-245
PLEKHF1	SIGLEC15+ mac	0.544073	0.00503159	0.0056338	0.0250141	ifn-induced mac	2.00671	3.68832	3.53403e-233
FLNA	SIGLEC15+ mac	0.832827	0.0631875	0.10683	0.0917183	microglia-like mac	1.98965	2.38903	1.17402e-240
HTRA3	SIGLEC15+ mac	0.525836	0.00479757	0.0056338	0.0241127	ifn-induced mac	1.95875	3.72502	1.04897e-224
PSTPIP1	SIGLEC15+ mac	0.711246	0.0388486	0.0542907	0.0637746	microglia-like mac	1.95763	2.7524	1.8399e-217
LAT	SIGLEC15+ mac	0.556231	0.0100632	0.0140845	0.0303099	ifn-induced mac	1.94474	3.49628	4.57149e-215
CAVIN3	SIGLEC15+ mac	0.49848	0.00362743	0.00700525	0.0219718	microglia-like mac	1.90319	3.81799	2.15118e-217
LXN	SIGLEC15+ mac	0.683891	0.0383805	0.0647887	0.0623099	ifn-induced mac	1.89823	2.77564	1.17526e-204
SLC16A7	SIGLEC15+ mac	0.604863	0.0222326	0.0228346	0.043831	tissue-repair mac	1.89166	3.12741	9.33984e-201
SLC9B2	SIGLEC15+ mac	0.510638	0.00912708	0.0197183	0.0277183	ifn-induced mac	1.83098	3.58566	2.53265e-195
COL27A1	SIGLEC15+ mac	0.483283	0.00526562	0.0084507	0.0229859	ifn-induced mac	1.82336	3.77287	1.80171e-199
COL1A2	SIGLEC15+ mac	0.62614	0.0362743	0.0700525	0.0581408	microglia-like mac	1.7813	2.84489	8.46468e-181
CRIP1	SIGLEC15+ mac	0.617021	0.0352212	0.0591549	0.0567887	ifn-induced mac	1.76987	2.86842	1.75342e-178
EHD2	SIGLEC15+ mac	0.43465	0.00222326	0.00350263	0.0182535	microglia-like mac	1.74008	4.0034	1.96946e-193
CA2	SIGLEC15+ mac	0.601824	0.0363913	0.0788732	0.0573521	ifn-induced mac	1.72034	2.85855	2.22925e-169
CKB	SIGLEC15+ mac	0.705167	0.0644746	0.443082	0.0882254	microglia-like mac	1.71205	2.42786	4.07539e-175
TNNT1	SIGLEC15+ mac	0.425532	0.00327639	0.0084507	0.0189296	ifn-induced mac	1.6881	3.96703	3.2243e-181
CLEC4A	SIGLEC15+ mac	0.933131	0.136672	0.31831	0.166197	ifn-induced mac	1.67458	1.79458	9.95237e-217
HSD3B7	SIGLEC15+ mac	0.513678	0.0202434	0.0211286	0.0385352	tissue-repair mac	1.67263	3.25618	5.73897e-162
SPARC	SIGLEC15+ mac	0.674772	0.0611982	0.101576	0.0839437	microglia-like mac	1.67182	2.47761	1.37934e-165
PTPN22	SIGLEC15+ mac	0.519757	0.0221156	0.0535211	0.0405634	ifn-induced mac	1.66576	3.20489	2.42298e-160
S100A3	SIGLEC15+ mac	0.392097	0.000351041	0.000393701	0.0148732	tissue-repair mac	1.65002	4.20819	5.34949e-189
SPINT1	SIGLEC15+ mac	0.49848	0.0198923	0.0367776	0.0376338	microglia-like mac	1.63494	3.27985	8.15346e-156
CD109	SIGLEC15+ mac	0.553191	0.0328809	0.0343832	0.052169	tissue-repair mac	1.63372	2.95327	8.9476e-154
HSPB7	SIGLEC15+ mac	0.389058	0.00093611	0.0028169	0.0153239	ifn-induced mac	1.62562	4.17834	1.12281e-180
CD9	SIGLEC15+ mac	0.723404	0.0864732	0.197898	0.110085	microglia-like mac	1.5962	2.20651	7.40485e-159
S100A10	SIGLEC15+ mac	0.978723	0.168734	0.323944	0.198761	ifn-induced mac	1.58128	1.61565	4.84728e-221
ANXA2	SIGLEC15+ mac	1	0.177276	0.298592	0.207775	ifn-induced mac	1.5713	1.5713	9.98876e-233
NFATC1	SIGLEC15+ mac	0.768997	0.109057	0.121127	0.133521	ifn-induced mac	1.54837	2.0135	5.1519e-158
LGALS3	SIGLEC15+ mac	0.860182	0.139012	0.233803	0.165746	ifn-induced mac	1.546	1.7973	1.17354e-175
PLP2	SIGLEC15+ mac	0.793313	0.120641	0.302977	0.145577	microglia-like mac	1.52875	1.92705	3.97983e-159
SYCE1L	SIGLEC15+ mac	0.468085	0.0218816	0.0367776	0.0384225	microglia-like mac	1.52554	3.25911	1.27815e-137
PPIC	SIGLEC15+ mac	0.386018	0.00526562	0.0056338	0.0193803	ifn-induced mac	1.52226	3.9435	3.19229e-150
LMNA	SIGLEC15+ mac	0.914894	0.163234	0.17021	0.191099	tissue-repair mac	1.51412	1.65497	8.90452e-186
RFTN2	SIGLEC15+ mac	0.349544	0.00152118	0.00525394	0.0144225	microglia-like mac	1.4817	4.23896	7.41273e-155
SUPT3H	SIGLEC15+ mac	0.556231	0.0514861	0.084063	0.0701972	microglia-like mac	1.4776	2.65645	8.03096e-128
RALA	SIGLEC15+ mac	0.899696	0.167681	0.217163	0.194817	microglia-like mac	1.47163	1.6357	9.29314e-175
AHNAK	SIGLEC15+ mac	0.696049	0.0998128	0.191549	0.121915	ifn-induced mac	1.46478	2.10443	2.06284e-135
CALHM2	SIGLEC15+ mac	0.696049	0.100866	0.17338	0.12293	microglia-like mac	1.45902	2.09614	1.51781e-134
NRIP3	SIGLEC15+ mac	0.398176	0.0117014	0.0192644	0.0260282	microglia-like mac	1.45278	3.64858	7.77542e-132
SELENOM	SIGLEC15+ mac	0.449848	0.0239878	0.0315236	0.0397746	microglia-like mac	1.45055	3.22453	1.74261e-125
MATK	SIGLEC15+ mac	0.87234	0.163936	0.273205	0.190197	microglia-like mac	1.44782	1.65969	9.25409e-164
IGFBP6	SIGLEC15+ mac	0.340426	0.00187222	0.0028169	0.0144225	ifn-induced mac	1.44305	4.23896	1.85132e-147
PDE4DIP	SIGLEC15+ mac	0.902736	0.177744	0.182021	0.20462	tissue-repair mac	1.43228	1.5866	1.15791e-169
EXT1	SIGLEC15+ mac	0.410334	0.0163819	0.0169014	0.0309859	ifn-induced mac	1.42559	3.47422	9.39304e-125
ADK	SIGLEC15+ mac	0.644377	0.0895156	0.108581	0.110085	microglia-like mac	1.42182	2.20651	6.03229e-124
RIOX2	SIGLEC15+ mac	0.50152	0.042593	0.0788091	0.0596056	microglia-like mac	1.41429	2.82001	2.08274e-117
THOP1	SIGLEC15+ mac	0.571429	0.0659958	0.0945709	0.0847324	microglia-like mac	1.41043	2.46826	8.07768e-118
F2R	SIGLEC15+ mac	0.404255	0.01685	0.0315236	0.0312113	microglia-like mac	1.40154	3.46698	5.02808e-121
MMP9	SIGLEC15+ mac	0.978723	0.212614	0.315493	0.241014	ifn-induced mac	1.39263	1.4229	5.70576e-192
CLDN7	SIGLEC15+ mac	0.379939	0.0122864	0.0245184	0.0259155	microglia-like mac	1.38789	3.65291	6.12456e-122
RHOF	SIGLEC15+ mac	0.483283	0.0417739	0.0875657	0.0581408	microglia-like mac	1.37488	2.84489	2.21867e-111
ADSS	SIGLEC15+ mac	0.702128	0.120056	0.175131	0.141634	microglia-like mac	1.37232	1.95451	2.34434e-122
CDK5	SIGLEC15+ mac	0.610942	0.0881114	0.143608	0.107493	microglia-like mac	1.3626	2.23033	1.14058e-112
ARHGAP10	SIGLEC15+ mac	0.534954	0.0617833	0.0732394	0.0793239	ifn-induced mac	1.35569	2.53422	2.03639e-108
CAPG	SIGLEC15+ mac	0.835866	0.17318	0.728546	0.197746	microglia-like mac	1.35475	1.62077	2.12613e-141
PNMA1	SIGLEC15+ mac	0.462006	0.0379125	0.0753065	0.0536338	microglia-like mac	1.35163	2.92558	3.01882e-108
OXR1	SIGLEC15+ mac	0.838906	0.175638	0.17664	0.200225	tissue-repair mac	1.34922	1.60831	3.04298e-141
AK5	SIGLEC15+ mac	0.31003	0.00175521	0.0019685	0.0131831	tissue-repair mac	1.34207	4.32882	4.82429e-133
REPIN1	SIGLEC15+ mac	0.735562	0.139832	0.202817	0.161915	ifn-induced mac	1.33922	1.82068	8.66798e-122
SLC4A2	SIGLEC15+ mac	0.607903	0.0917388	0.0998249	0.110873	microglia-like mac	1.337	2.19937	1.06244e-108
CCNB1IP1	SIGLEC15+ mac	0.632219	0.102153	0.180385	0.121803	microglia-like mac	1.33104	2.10535	1.52257e-109
TXLNB	SIGLEC15+ mac	0.410334	0.0248069	0.0422535	0.0390986	ifn-induced mac	1.33017	3.24167	1.03457e-107
CARHSP1	SIGLEC15+ mac	0.556231	0.0745378	0.126095	0.0923944	microglia-like mac	1.32477	2.38169	2.27382e-104
FXYD6	SIGLEC15+ mac	0.483283	0.0484437	0.0535211	0.0645634	ifn-induced mac	1.32425	2.74011	1.9076e-103
FAIM	SIGLEC15+ mac	0.428571	0.0307746	0.0805604	0.0455211	microglia-like mac	1.32411	3.08958	2.2826e-105
KIAA0040	SIGLEC15+ mac	0.367781	0.0142757	0.0309859	0.0273803	ifn-induced mac	1.32325	3.59793	1.99617e-111
SCD5	SIGLEC15+ mac	0.319149	0.00432951	0.00875657	0.016	microglia-like mac	1.31973	4.13517	2.30422e-122
FLNB	SIGLEC15+ mac	0.419453	0.0285514	0.0455342	0.0430423	microglia-like mac	1.31942	3.14557	3.38698e-105
ACTN1	SIGLEC15+ mac	0.43769	0.034285	0.0647887	0.0492394	ifn-induced mac	1.31791	3.01106	7.29328e-104
COMTD1	SIGLEC15+ mac	0.43769	0.0347531	0.0595447	0.0496901	microglia-like mac	1.31392	3.00195	3.20823e-103
PTPRN	SIGLEC15+ mac	0.291793	0.000351041	0.00175131	0.0111549	microglia-like mac	1.31187	4.49587	1.04989e-136
COQ8A	SIGLEC15+ mac	0.528875	0.0668149	0.0873239	0.0839437	ifn-induced mac	1.31035	2.47761	1.60131e-101
EOGT	SIGLEC15+ mac	0.458967	0.042593	0.0591549	0.0580282	ifn-induced mac	1.3066	2.84683	3.05998e-101
ATP6V1H	SIGLEC15+ mac	0.796353	0.17084	0.206655	0.194028	microglia-like mac	1.30582	1.63975	1.70557e-126
CD151	SIGLEC15+ mac	0.629179	0.106834	0.182137	0.126197	microglia-like mac	1.30234	2.06991	3.58959e-105
MDFIC	SIGLEC15+ mac	0.541033	0.0730166	0.0734908	0.0903662	tissue-repair mac	1.30058	2.40389	2.31185e-100
PDLIM4	SIGLEC15+ mac	0.316109	0.00491458	0.0105079	0.0164507	microglia-like mac	1.29838	4.10739	3.28347e-118
A1BG	SIGLEC15+ mac	0.364742	0.0156799	0.0366197	0.0286197	ifn-induced mac	1.29617	3.55366	7.35629e-107
RAB13	SIGLEC15+ mac	0.960486	0.234262	0.326761	0.261183	ifn-induced mac	1.28949	1.34253	4.60986e-168
PRPSAP2	SIGLEC15+ mac	0.62614	0.10894	0.162872	0.128113	microglia-like mac	1.28662	2.05485	1.05805e-102
DNM1	SIGLEC15+ mac	0.389058	0.0231687	0.0250656	0.0367324	tissue-repair mac	1.28548	3.3041	4.53134e-102
BZW2	SIGLEC15+ mac	0.617021	0.105897	0.197898	0.124845	microglia-like mac	1.28382	2.08068	1.19411e-101
RAB34	SIGLEC15+ mac	0.680851	0.131992	0.202817	0.152338	ifn-induced mac	1.28113	1.88165	8.29009e-107
MAGEF1	SIGLEC15+ mac	0.62614	0.111748	0.25394	0.130817	microglia-like mac	1.27354	2.03396	7.46274e-101
MVP	SIGLEC15+ mac	0.68997	0.139246	0.307042	0.159662	ifn-induced mac	1.26588	1.8347	1.29074e-105
MID1IP1	SIGLEC15+ mac	0.635258	0.117365	0.175131	0.136563	microglia-like mac	1.26478	1.99097	2.57611e-100
TNNI2	SIGLEC15+ mac	0.653495	0.126141	0.160563	0.14569	ifn-induced mac	1.25881	1.92627	5.09269e-101
DCTPP1	SIGLEC15+ mac	0.662614	0.130002	0.241681	0.149746	microglia-like mac	1.25818	1.89881	9.24851e-102
NAT14	SIGLEC15+ mac	0.343465	0.0134566	0.0253521	0.0256901	ifn-induced mac	1.25765	3.66165	4.19579e-103
MRPL15	SIGLEC15+ mac	0.762918	0.171308	0.313485	0.193239	microglia-like mac	1.2541	1.64383	1.6548e-113
PLEC	SIGLEC15+ mac	0.553191	0.0867072	0.140105	0.104	microglia-like mac	1.25207	2.26336	1.09662e-93

## Sheet: 2_SVM_predictions_microglia
	prob_EMP	prob_ErP	prob_GMP	prob_HSPC	prob_ILC	prob_LMP	prob_Lymphoblast	prob_Mac_1	prob_Mac_2	prob_Mac_3	prob_Mac_4	prob_MkP	prob_Myeloblast
FCA_GND8047884_CCCATACAGAGATGAG	0.0174072	0.170632	0.0095697	0.0106314	0.00423347	0.0109405	0.0110891	0.00499534	0.0186235	0.00399793	0.00377112	0.709089	0.00935336
FCA_GND8047884_CTTAGGATCAGTGCAT	0.033483	0.0312663	0.00622604	0.00939377	0.00190297	0.0346639	0.00911264	0.0932241	0.717513	0.00745527	0.00194697	0.00373208	0.00519333
FCA_GND8047884_TGGCCAGCAGAAGCAC	0.0967961	0.055101	0.0168468	0.0294907	0.00595567	0.214122	0.0308762	0.0110408	0.0726227	0.00873728	0.00582861	0.00885247	0.329366
FCA_GND8047884_TTCGAAGCATGTCTCC	0.000560245	0.000862631	0.00144486	0.00177519	0.00176282	0.104492	0.872537	0.000515679	0.00111484	0.000546457	0.00197286	0.00135194	0.00261655
FCA_GND8125922_AAACCTGAGTGGGCTA	0.0304329	0.0189756	0.0080795	0.0131665	0.00166536	0.0968775	0.00742048	0.0274074	0.699887	0.0418752	0.00438226	0.00300818	0.00741536
FCA_GND8125922_AAACCTGCATTGGGCC	0.0019869	0.00196515	0.622897	0.00188713	0.000862979	0.00518305	0.00748517	0.00274072	0.0075579	0.0026529	0.00153113	0.00191422	0.331221
FCA_GND8125922_AAACGGGCAGCGATCC	0.0058609	0.00719117	0.00460928	0.00777423	0.00144098	0.539863	0.268032	0.00322676	0.0381419	0.00550514	0.00290975	0.0024501	0.0047563
FCA_GND8125922_AACACGTGTGTAAGTA	0.00550918	0.0070646	0.00693913	0.00314714	0.00478215	0.00646947	0.00392459	0.0104771	0.82592	0.0118722	0.00416513	0.00364205	0.00441442
FCA_GND8125922_AACCATGGTTGAGTTC	0.0354407	0.0208618	0.0124174	0.00965418	0.00318655	0.0131293	0.0101937	0.276911	0.26044	0.310711	0.00487244	0.00344422	0.00300998
FCA_GND8125922_AACGTTGCAGGAATGC	0.0113822	0.0102222	0.00464129	0.0103456	0.00225474	0.0351291	0.0121756	0.0454143	0.761744	0.0108113	0.00389036	0.00194515	0.00546335
FCA_GND8125922_AACGTTGGTGCAGGTA	0.00127247	0.00338714	0.00265159	0.00632871	0.00114377	0.209728	0.00816849	0.0022722	0.0623017	0.0019901	0.00356506	0.00113453	0.00725413
FCA_GND8125922_AACTCCCAGTATGACA	0.0447519	0.0139649	0.169349	0.0194513	0.00330885	0.0506421	0.0177001	0.0583097	0.0159066	0.013677	0.00355692	0.00380218	0.537151
FCA_GND8125922_AACTCCCCACACCGCA	0.160631	0.157253	0.0212605	0.0225699	0.00195235	0.0164871	0.0232481	0.00344777	0.0077552	0.003088	0.00301352	0.00444218	0.00387238
FCA_GND8125922_AACTCCCGTGAGGCTA	0.00223564	0.00118374	0.000875256	0.00248352	0.000959498	0.00113944	0.00146088	0.00307472	0.00270183	0.00302832	0.000932363	0.00118297	0.971466
FCA_GND8125922_AACTGGTAGAACTCGG	0.000909862	0.000569988	0.000688767	0.000942864	0.000634473	0.00255029	0.00168852	0.0437016	0.924066	0.0162794	0.00224885	0.00087749	0.000552071
FCA_GND8125922_AACTGGTGTCCAGTTA	0.000271043	0.000385306	0.000461297	0.000969587	0.000722681	0.000824096	0.989783	0.000347437	0.000491363	0.000318087	0.00327922	0.000417661	0.000266037
FCA_GND8125922_AACTTTCAGTGTACTC	0.00313468	0.00368371	0.00163069	0.00265081	0.000686405	0.0058065	0.00127045	0.018693	0.0487275	0.00735887	0.00652756	0.00111862	0.0174837
FCA_GND8125922_AACTTTCTCTGATACG	0.000964185	0.000850283	0.00125742	0.000929589	0.000395831	0.00335709	0.00177156	0.031018	0.926537	0.0118934	0.00621678	0.000887491	0.00113029
FCA_GND8125922_AAGGAGCCATGCCTAA	0.00326003	0.0022456	0.00171438	0.00232181	0.000317569	0.00341809	0.000956757	0.00225569	0.00337159	0.00232878	0.00176975	0.0011784	0.969575
FCA_GND8125922_AAGGAGCTCAAGGTAA	0.00705277	0.00836329	0.00345226	0.00717308	0.000888998	0.0164921	0.0131789	0.0125769	0.876204	0.0053496	0.00172778	0.00180986	0.00163823
FCA_GND8125922_AAGGTTCCATAGGATA	0.0269663	0.0196469	0.0176295	0.012628	0.00501509	0.132309	0.0399071	0.0443253	0.374619	0.0185125	0.103864	0.00635563	0.0119468
FCA_GND8125922_AAGGTTCTCTGGCGAC	0.00269081	0.00517225	0.00597901	0.00144959	0.00122908	0.0127493	0.00416529	0.0095963	0.875211	0.0466361	0.00531122	0.00158135	0.0066406
FCA_GND8125922_AAGTCTGAGAGCCTAG	0.00167506	0.0022424	0.00293361	0.00133296	0.00124869	0.0172009	0.00277159	0.00295471	0.00811883	0.00192893	0.00186032	0.0024844	0.943872
FCA_GND8125922_AAGTCTGTCCCTGACT	0.0069948	0.0187276	0.00860472	0.0121333	0.00188257	0.0171599	0.00460914	0.0276244	0.188286	0.0705193	0.00512942	0.00258763	0.00410788
FCA_GND8125922_AATCGGTGTGTGACGA	0.00203386	0.00321831	0.00249996	0.00183653	0.00095813	0.013865	0.00216864	0.00156127	0.0107534	0.00250251	0.00186661	0.00271992	0.946649
FCA_GND8125922_ACACCCTAGCTAAGAT	0.00574825	0.00592756	0.00312863	0.00727507	0.000823635	0.321946	0.0201189	0.0069268	0.347744	0.00570151	0.00558631	0.00259399	0.00859271
FCA_GND8125922_ACATACGCATTCTCAT	0.00337666	0.00254805	0.00797139	0.00117977	0.000583948	0.00686368	0.00124713	0.00137966	0.00328332	0.00104163	0.000859271	0.00151882	0.963377
FCA_GND8125922_ACATCAGCATCCCATC	0.0154411	0.00643576	0.008234	0.00627033	0.00261227	0.217744	0.00377191	0.0305031	0.671428	0.00940149	0.00254414	0.00225125	0.00314032
FCA_GND8125922_ACATGGTCACTCAGGC	0.00518237	0.00599353	0.00897069	0.00770616	0.00314527	0.0308759	0.0075441	0.0104964	0.242029	0.166203	0.00537879	0.00261354	0.0159707
FCA_GND8125922_ACCAGTACAGGGTTAG	0.0137757	0.00946479	0.0111923	0.00841104	0.00523006	0.0368691	0.0310865	0.0300974	0.598076	0.0401982	0.128893	0.00415894	0.00936125
FCA_GND8125922_ACCAGTATCATGGTCA	0.00939186	0.0041209	0.00353662	0.0113138	0.00102362	0.00738537	0.00598705	0.00235296	0.00850027	0.00301377	0.00208458	0.00168029	0.924536
FCA_GND8125922_ACCCACTAGGGAACGG	0.0199519	0.0212987	0.0156587	0.012771	0.00571656	0.0293074	0.0223846	0.135991	0.495273	0.195787	0.00772586	0.00401128	0.00643902
FCA_GND8125922_ACCGTAAGTTGTGGCC	0.00827451	0.0100208	0.00511771	0.010035	0.00136883	0.0490668	0.00685284	0.0315454	0.542302	0.0282242	0.0059177	0.00239248	0.00400728
FCA_GND8125922_ACCGTAATCTTAGCCC	0.010586	0.0120101	0.00528719	0.00345722	0.00132358	0.0134674	0.00646802	0.0130789	0.840167	0.0512009	0.00199526	0.00176942	0.00177884
FCA_GND8125922_ACCTTTAAGTATCTCG	0.010822	0.00839777	0.00548382	0.0121234	0.00197995	0.0438851	0.020645	0.0658769	0.594625	0.0395736	0.0115929	0.00212681	0.00506845
FCA_GND8125922_ACGAGGAGTGTTTGGT	0.00706486	0.00719654	0.00543634	0.00658066	0.00159925	0.542408	0.00778147	0.00968168	0.037633	0.0066836	0.00220963	0.0020924	0.0389282
FCA_GND8125922_ACGATACAGAGACGAA	0.00242119	0.00105707	0.0362941	0.00294006	0.000437601	0.00179732	0.00167346	0.00033698	0.000578114	0.000501598	0.000492907	0.000708204	0.946938
FCA_GND8125922_ACGCAGCAGCTCAACT	0.00503864	0.00344841	0.004521	0.0036433	0.00148141	0.183057	0.00666114	0.00288603	0.0195395	0.0021672	0.00249163	0.00202966	0.676467
FCA_GND8125922_ACGCCGAGTCCGACGT	0.000549348	0.0006321	0.00119848	0.000672946	0.000252573	0.000873327	0.000457014	0.000390166	0.000598181	0.00101141	0.000419732	0.000598729	0.98755
FCA_GND8125922_ACGGGCTAGGTAGCCA	0.00785564	0.0123164	0.00608301	0.014618	0.00252368	0.0571323	0.0252721	0.0131897	0.1639	0.0118366	0.0762509	0.00347782	0.00875193
FCA_GND8125922_ACGGGCTGTCTAAAGA	0.00277481	0.00216758	0.00153124	0.00226871	0.000481748	0.00570196	0.00304334	0.00333391	0.00304977	0.00253963	0.00150645	0.00107846	0.963394
FCA_GND8125922_ACGTCAAAGTACGTTC	0.0186404	0.00548579	0.00539743	0.0033147	0.000790896	0.00615132	0.00290163	0.0425255	0.875809	0.0154563	0.00125738	0.00146237	0.00436937
FCA_GND8125922_ACGTCAAGTACCGGCT	0.000656264	0.0139103	0.00136827	0.000819633	0.000782926	0.00067991	0.000619663	0.000378795	0.000864484	0.000623687	0.00059509	0.976859	0.000827552
FCA_GND8125922_ACTATCTCACATTTCT	0.00780918	0.00758687	0.00631011	0.00539629	0.00123639	0.0210336	0.0034887	0.052359	0.842016	0.0173311	0.00312255	0.00281443	0.00292006
FCA_GND8125922_ACTATCTCACGAAGCA	0.00336233	0.0048971	0.00627335	0.00293199	0.00148949	0.0137806	0.00485422	0.0168027	0.463041	0.134629	0.00275671	0.00160041	0.00145265
FCA_GND8125922_ACTATCTCAGCTGCTG	0.0129119	0.00764274	0.0087215	0.00856137	0.00190724	0.0586866	0.0141535	0.0696021	0.413183	0.029409	0.0107186	0.00206748	0.0212863
FCA_GND8125922_ACTGAACTCTATCCCG	0.000462425	0.000842379	0.00220614	0.000741036	0.000918888	0.000344116	0.000543065	0.000539671	0.000889674	0.00078403	0.00086633	0.00209685	0.000388
FCA_GND8125922_ACTGAGTAGAAGGTGA	0.00817401	0.00365749	0.00208931	0.0336603	0.00193794	0.00817749	0.906422	0.00231486	0.00336883	0.00253834	0.00384119	0.00267648	0.00233263
FCA_GND8125922_ACTGAGTAGTTAAGTG	0.00499017	0.00664626	0.00346849	0.00680579	0.00138089	0.0139884	0.00491768	0.0347886	0.43931	0.0275501	0.0143457	0.00214091	0.00244274
FCA_GND8125922_ACTGATGTCCTAGAAC	0.0317425	0.0157163	0.0116403	0.0213361	0.003774	0.183856	0.040109	0.0395101	0.310529	0.0161271	0.0662059	0.00518519	0.0141511
FCA_GND8125922_ACTGCTCAGGAGTAGA	0.00470234	0.00315493	0.00512684	0.00294385	0.00140107	0.494847	0.0151563	0.00232258	0.0270687	0.00153005	0.00324422	0.00240911	0.0246153
FCA_GND8125922_ACTTACTTCCCTGACT	8.7797e-05	0.000100675	0.988801	0.000288802	0.000371498	0.000195218	0.000432228	0.000139507	0.000112551	0.000162888	0.0004331	0.00083252	0.00767443
FCA_GND8125922_AGACGTTCAGTTTACG	0.0035496	0.00494569	0.00264524	0.00796823	0.00079671	0.0353768	0.0219525	0.00379672	0.535542	0.00519508	0.0026497	0.00209296	0.00218032
FCA_GND8125922_AGAGCTTAGGTTACCT	0.0212549	0.00538879	0.00374781	0.0166407	0.00134148	0.0124688	0.00886682	0.00344231	0.0128863	0.00722797	0.00344668	0.00244288	0.873512
FCA_GND8125922_AGAGCTTCAGACTCGC	0.00171113	0.00155893	0.000858181	0.000938594	0.000382621	0.00313637	0.000832141	0.000612687	0.00333738	0.000944194	0.000619571	0.00103132	0.981335
FCA_GND8125922_AGATTGCAGAATTGTG	0.00594941	0.0086037	0.00494279	0.00438337	0.00182079	0.0182254	0.00635565	0.0237359	0.459942	0.440194	0.00258789	0.00288944	0.00298609
FCA_GND8125922_AGCAGCCAGGATATAC	0.00215045	0.00218828	0.00230173	0.00125964	0.00282688	0.00188586	0.00166762	0.00160232	0.00996382	0.00240348	0.00316798	0.961099	0.00257917
FCA_GND8125922_AGCTCCTCATCAGTCA	0.00157677	0.00316843	0.00382019	0.0012564	0.00142006	0.0280208	0.00215019	0.00155329	0.00521344	0.00183198	0.000955102	0.00197031	0.939307
FCA_GND8125922_AGCTCTCGTGAAGGCT	0.0120424	0.00947205	0.00881718	0.00749202	0.00215749	0.173528	0.0124318	0.00857673	0.598283	0.00890806	0.00547276	0.00259523	0.0154982
FCA_GND8125922_AGGCCACTCCTCTAGC	0.0342806	0.0180221	0.0100761	0.0190428	0.00279016	0.312728	0.0375617	0.0107388	0.0779371	0.00535602	0.00537497	0.00366468	0.249044
FCA_GND8125922_AGGGATGTCCTTCAAT	0.00235329	0.00329868	0.00159365	0.00258505	0.00060936	0.00268025	0.00186054	0.0158918	0.941026	0.0188644	0.000567992	0.00201316	0.000637819
FCA_GND8125922_AGGGTGAGTCCATGAT	0.0171011	0.00878455	0.0141096	0.00905302	0.00355884	0.190181	0.0221905	0.0202358	0.508584	0.0451547	0.0359265	0.00360733	0.00703671
FCA_GND8125922_AGGTCATAGGAACTGC	0.00194564	0.00167623	0.00156234	0.00160346	0.000521075	0.00426113	0.00244097	0.0172539	0.892034	0.0532539	0.006684	0.00145509	0.000830913
FCA_GND8125922_AGGTCATCAGTCGATT	0.00104215	0.000218058	0.967688	0.00126529	0.000575534	0.000572391	0.00043303	0.000211075	0.000258698	0.000322081	0.00045197	0.000788785	0.0248177
FCA_GND8125922_AGGTCATGTGAAAGAG	0.0712876	0.0193982	0.0156684	0.0309219	0.00447261	0.132559	0.0214407	0.0142892	0.0250386	0.0103874	0.00758343	0.00475618	0.445772
FCA_GND8125922_AGGTCATGTTGCCTCT	0.0631264	0.052926	0.024448	0.0112024	0.0046657	0.672897	0.0132919	0.0137054	0.0781427	0.00979943	0.00335985	0.00486163	0.0236468
FCA_GND8125922_AGGTCCGAGAGTTGGC	0.00461182	0.00289309	0.00106803	0.00343812	0.000448997	0.00234006	0.00130446	0.00145296	0.00256764	0.00185509	0.00105599	0.000922148	0.964904
FCA_GND8125922_AGGTCCGGTTACCGAT	0.00500471	0.00443594	0.00391685	0.00544197	0.000465612	0.0399904	0.00346193	0.00901042	0.882665	0.00693837	0.0027208	0.00125813	0.0052606
FCA_GND8125922_AGGTCCGGTTGCCTCT	0.0118534	0.0145997	0.00781816	0.0149078	0.00320669	0.0919717	0.0261129	0.0158156	0.567632	0.0453878	0.00518002	0.00411403	0.00671568
FCA_GND8125922_AGGTCCGTCATCTGTT	0.0079637	0.00536226	0.0034518	0.00323867	0.000604554	0.0147997	0.0049366	0.0192557	0.905366	0.0118833	0.00149832	0.00136992	0.00210395
FCA_GND8125922_AGTAGTCAGAAACGAG	0.00489989	0.00488138	0.00211681	0.00659899	0.00091583	0.015634	0.00661607	0.0750675	0.818682	0.0373776	0.00340426	0.00361981	0.00193627
FCA_GND8125922_AGTAGTCCATTGCGGC	0.273153	0.0318098	0.0205158	0.045625	0.039708	0.0773201	0.427017	0.00966064	0.0139268	0.00433385	0.00718501	0.0045609	0.011185
FCA_GND8125922_AGTAGTCTCCAAGTAC	0.00490836	0.00540089	0.00368591	0.00411561	0.00119796	0.196586	0.0470656	0.00525673	0.652499	0.00367522	0.00347293	0.00313854	0.00941104
FCA_GND8125922_AGTCTTTTCGATGAGG	0.00774508	0.00964375	0.00625026	0.00411438	0.00272625	0.0468589	0.0146907	0.0577839	0.586758	0.234848	0.00818146	0.00339798	0.00308431
FCA_GND8125922_AGTGAGGTCACTTCAT	0.0401266	0.0117892	0.0139319	0.0404	0.0288323	0.0861007	0.706241	0.00332753	0.016506	0.00379312	0.00402008	0.00313473	0.00530221
FCA_GND8125922_AGTGGGAAGCTGCCCA	0.000405064	0.000314813	0.000421453	0.000739015	0.000496005	0.000916675	0.988155	0.000533665	0.00187026	0.000644549	0.00148239	0.00107158	0.000604869
FCA_GND8125922_AGTTGGTCAGCCTGTG	0.000404921	0.000782958	0.000903795	0.000659119	0.000413843	0.000410798	0.000346453	0.000562816	0.00161459	0.00121186	0.000663212	0.00262159	0.00033876
FCA_GND8125922_ATAAGAGCAGTACACT	0.00457379	0.00365147	0.00294109	0.00227068	0.00130322	0.00779894	0.00500307	0.0340991	0.759484	0.148132	0.00211136	0.00297901	0.00248224
FCA_GND8125922_ATAAGAGCATGCCACG	0.0361524	0.0226075	0.0104017	0.014124	0.00214772	0.223236	0.0325571	0.0130721	0.542764	0.0127633	0.01014	0.00278051	0.00394844
FCA_GND8125922_ATAAGAGGTAATCGTC	0.000794752	0.00156329	0.000603888	0.00249002	0.000358406	0.0026646	0.985008	0.000887415	0.000821513	0.000454932	0.00142036	0.000814526	0.000374067
FCA_GND8125922_ATCACGAAGCTAGTCT	0.00170846	0.00281973	0.00354814	0.00236023	0.00167991	0.00900135	0.00491412	0.914089	0.0134477	0.0274729	0.00263115	0.00176838	0.00725846
FCA_GND8125922_ATCATCTAGGGTGTTG	0.0788598	0.0274238	0.00831423	0.101026	0.00296716	0.467288	0.0280391	0.00359001	0.00791377	0.00289491	0.00308856	0.00347903	0.0858041
FCA_GND8125922_ATCATCTTCTGCCAGG	0.00199496	0.00183276	0.00126325	0.00112428	0.000348632	0.00322878	0.00094519	0.00184225	0.00327839	0.00151302	0.00107147	0.00107515	0.975742
FCA_GND8125922_ATCATGGCACACCGAC	0.0205416	0.0124201	0.00780125	0.021875	0.0019299	0.0663589	0.00871835	0.00787676	0.0261026	0.00388142	0.00359602	0.00341829	0.588747
FCA_GND8125922_ATCCGAATCTCTGCTG	0.0122671	0.00982698	0.0306129	0.00908324	0.00561176	0.31557	0.0277943	0.00841367	0.0433345	0.00886144	0.0046867	0.0049377	0.429896
FCA_GND8125922_ATCTACTTCCCTCTTT	0.00654579	0.00267618	0.00170021	0.0204953	0.000763751	0.00907909	0.936527	0.00128537	0.00287419	0.00151966	0.00195755	0.00156748	0.00263061
FCA_GND8125922_ATCTGCCCATGCCTAA	0.0359282	0.0102353	0.456293	0.0143754	0.00314825	0.264014	0.0846287	0.00333404	0.0205861	0.00417614	0.00322971	0.00535873	0.069711
FCA_GND8125922_ATGAGGGCAAGCGTAG	0.00422929	0.0026691	0.00318537	0.00423995	0.000589094	0.00917682	0.00396744	0.00148736	0.00338712	0.00149759	0.00140858	0.00162951	0.948023
FCA_GND8125922_ATGGGAGAGGGCATGT	0.0421931	0.0167005	0.00592891	0.0192537	0.00348989	0.0324094	0.0136804	0.00988888	0.0234542	0.00779743	0.00296684	0.0032302	0.756719
FCA_GND8125922_ATTACTCGTTAAGATG	0.00498536	0.00494146	0.00451994	0.00378391	0.00089237	0.0125938	0.00491782	0.118534	0.737318	0.0854543	0.00404206	0.00149511	0.00439325
FCA_GND8125922_ATTGGACCACAGACAG	0.00405476	0.00136396	0.00118632	0.00262431	0.000738663	0.00463235	0.970553	0.00106342	0.00201186	0.00141282	0.00238685	0.00130102	0.00161828
FCA_GND8125922_ATTGGTGGTCCCTACT	0.00874861	0.00704674	0.00766167	0.0128013	0.00281999	0.194935	0.0427383	0.0162211	0.268762	0.0182078	0.108367	0.0039225	0.0144576
FCA_GND8125922_ATTGGTGGTCGAACAG	0.0089974	0.00383484	0.00441125	0.00313424	0.00120936	0.0121901	0.00943117	0.040443	0.891403	0.00617078	0.00111387	0.00163361	0.00230651
FCA_GND8125922_ATTTCTGGTAATTGGA	0.042056	0.0233764	0.00599777	0.0311987	0.00161391	0.0381456	0.0142247	0.0139247	0.082665	0.00951502	0.00401238	0.00257895	0.00577484
FCA_GND8125922_CAACCAACAAGCGCTC	0.0104216	0.0142583	0.00661068	0.00561635	0.00119951	0.0164546	0.00387374	0.0450218	0.808067	0.0392065	0.00204412	0.00240591	0.00288607
FCA_GND8125922_CAACTAGCAGATCGGA	0.00670865	0.00647641	0.00456055	0.00520461	0.00105977	0.0633007	0.00834637	0.00633446	0.853899	0.00584178	0.00718328	0.00176862	0.00291552
FCA_GND8125922_CAACTAGTCCTTTCTC	0.00243139	0.00170658	0.00239031	0.00166361	0.000876717	0.840598	0.074736	0.000738595	0.019212	0.00076223	0.00139261	0.00133102	0.00585335
FCA_GND8125922_CAAGAAAAGCCACGCT	0.0243025	0.0109623	0.00658261	0.0161625	0.00178854	0.1791	0.0180362	0.0194715	0.478978	0.00962938	0.0390033	0.00283862	0.00473216
FCA_GND8125922_CAAGAAAAGTGGTAGC	0.00164703	0.00119178	0.00241516	0.00125571	0.00201207	0.0295953	0.00199569	0.010913	0.91595	0.00237702	0.00620588	0.00108607	0.000894204
FCA_GND8125922_CAAGATCAGGGTCTCC	0.0166801	0.010029	0.00912787	0.0131002	0.0024668	0.484506	0.06966	0.00625652	0.0584895	0.00461411	0.00345409	0.00273802	0.0220393
FCA_GND8125922_CAAGATCGTAAATGTG	0.0268856	0.00814819	0.00506415	0.00385639	0.00115998	0.0299409	0.014457	0.0253259	0.812262	0.0133814	0.00355795	0.00168363	0.00163586
FCA_GND8125922_CAAGATCGTTCACCTC	0.00367175	0.00410787	0.00661461	0.00336744	0.0015393	0.491949	0.0123333	0.0210047	0.416435	0.00987355	0.0104503	0.00221452	0.0035356
FCA_GND8125922_CAAGGCCAGAAACCTA	0.00223709	0.0017333	0.0036031	0.00316919	0.0011168	0.65319	0.00981231	0.00189241	0.0199338	0.0011925	0.00365196	0.0029157	0.0381296
FCA_GND8125922_CAAGGCCTCATGTCCC	0.028987	0.0178364	0.00903576	0.0101252	0.00404298	0.0346362	0.0107631	0.038723	0.472246	0.317159	0.0124738	0.00354729	0.00543834
FCA_GND8125922_CAAGTTGAGGGCATGT	0.0149635	0.00688837	0.00619047	0.0092637	0.00199984	0.0294331	0.0122161	0.00585847	0.0191139	0.00813866	0.00334881	0.00263622	0.83537
FCA_GND8125922_CACAAACCAAACCTAC	0.00192012	0.00382682	0.00360499	0.000960656	0.00140328	0.00671899	0.00328978	0.0291952	0.912536	0.0239697	0.000922522	0.00156322	0.00169635
FCA_GND8125922_CACACAAAGCGAGAAA	0.00349595	0.00203811	0.0040738	0.00108073	0.000506934	0.00296619	0.00118194	0.028086	0.0020951	0.0048974	0.0012309	0.00125573	0.93864
FCA_GND8125922_CACACAAAGGCAATTA	0.00158581	0.00160133	0.119588	0.00209738	0.00129464	0.00302356	0.00222844	0.000880625	0.00189241	0.00121324	0.00179402	0.00122669	0.85751
FCA_GND8125922_CACACCTCAGCCTTGG	0.00166191	0.00212385	0.000814793	0.00204956	0.000607831	0.0023072	0.00135255	0.00180755	0.00353631	0.00146473	0.0017566	0.00152353	0.971092
FCA_GND8125922_CACACTCGTTCGGGCT	0.0145872	0.0185202	0.0105921	0.00781283	0.00279942	0.0378379	0.0133996	0.0265471	0.561871	0.196611	0.00998087	0.0033986	0.00891161
FCA_GND8125922_CACAGTAGTGTGGCTC	0.0195236	0.872586	0.0100539	0.0103618	0.00209241	0.0191541	0.0097256	0.00422831	0.0118722	0.00353579	0.0028514	0.0109487	0.00466166
FCA_GND8125922_CACTCCAGTGAGGGTT	0.0189303	0.0191802	0.0120035	0.022654	0.00540887	0.0721149	0.0274961	0.0971716	0.106062	0.0190545	0.00887258	0.00519889	0.00849651
FCA_GND8125922_CAGAATCGTAGCGTAG	0.0020501	0.00162138	0.00224055	0.00108588	0.00100866	0.00116649	0.00158336	0.854892	0.0050633	0.120647	0.00277291	0.00138903	0.00106379
FCA_GND8125922_CAGATCACAATAGCAA	0.0250328	0.0269308	0.0199475	0.0184705	0.00548992	0.0478577	0.0145529	0.0434597	0.211126	0.48019	0.0111607	0.00527242	0.0136367
FCA_GND8125922_CAGATCACAGGGTATG	0.00327753	0.00654679	0.00490747	0.00238225	0.00481068	0.0042329	0.00372301	0.00288976	0.0344566	0.00424509	0.00682796	0.903669	0.0057595
FCA_GND8125922_CAGCATACACGGTAAG	0.00203322	0.00173082	0.00338633	0.00125757	0.000459294	0.00274815	0.000987939	0.00103054	0.00129177	0.00112568	0.000574205	0.00106401	0.976982
FCA_GND8125922_CAGCATATCTCGCATC	0.132021	0.527946	0.010749	0.0941486	0.00930695	0.0230866	0.0902175	0.00815003	0.0167802	0.0049264	0.0045013	0.00759146	0.00840312
FCA_GND8125922_CAGCCGATCACGGTTA	0.00607162	0.00482352	0.00271758	0.00964767	0.00143684	0.0390994	0.00842281	0.00584538	0.0193921	0.00329038	0.00216843	0.00197597	0.689689
FCA_GND8125922_CAGCGACAGTGAACAT	0.0172354	0.0091305	0.00822941	0.00797733	0.0018395	0.0269251	0.0148078	0.102669	0.701798	0.0510303	0.00624482	0.00524444	0.00278016
FCA_GND8125922_CAGCTAAGTACGCACC	0.0747732	0.0278233	0.0127221	0.0200994	0.00276317	0.0350958	0.0481689	0.035913	0.668034	0.0121276	0.00297127	0.00297588	0.00424507
FCA_GND8125922_CAGCTAAGTGAGTGAC	0.0629071	0.0308685	0.00844992	0.0240932	0.00251085	0.0521321	0.0139254	0.00915435	0.0228317	0.0046782	0.0026598	0.0033702	0.737714
FCA_GND8125922_CAGCTAATCTGCAAGT	0.00634579	0.0080179	0.00468249	0.00729664	0.00227534	0.00964258	0.00485409	0.0160928	0.184067	0.707163	0.0215215	0.00379092	0.00533019
FCA_GND8125922_CAGCTGGAGTCGCCGT	0.0018509	0.000750853	0.00119142	0.000852055	0.000504394	0.000902864	0.000616822	0.0111149	0.00117888	0.00271483	0.000631193	0.00102687	0.970629
FCA_GND8125922_CAGCTGGTCTATCCCG	0.00331596	0.00173017	0.00185655	0.00151153	0.000695176	0.00223976	0.00115361	0.00246026	0.00378342	0.00312001	0.0010766	0.00111616	0.964094
FCA_GND8125922_CAGGTGCAGCTCTCGG	0.0253197	0.0156073	0.00755288	0.0127752	0.00274412	0.154316	0.0758916	0.0291377	0.565063	0.0070044	0.00366221	0.00341355	0.00701311
FCA_GND8125922_CAGGTGCGTATAGGTA	0.0134251	0.0046091	0.0470112	0.00573092	0.00351797	0.614079	0.00779327	0.00384947	0.0176826	0.00263931	0.00336974	0.00334491	0.245777
FCA_GND8125922_CAGGTGCGTGTTGAGG	0.0189047	0.0140007	0.0075314	0.0161035	0.00389023	0.0509374	0.0138518	0.0317034	0.113122	0.0275216	0.0179764	0.00490107	0.184344
FCA_GND8125922_CAGGTGCGTTTGTTGG	0.00715355	0.0017057	0.00111171	0.0135862	0.000837357	0.00100681	0.962478	0.00099515	0.00133952	0.00064139	0.00218089	0.00124759	0.000649549
FCA_GND8125922_CAGTAACAGACTGTAA	0.000424926	0.000354569	0.000550461	0.000433427	0.000754061	0.00150639	0.988951	0.00100596	0.000863598	0.000534778	0.00234294	0.000647884	0.000392242
FCA_GND8125922_CAGTCCTCATAAAGGT	0.00734487	0.0061747	0.00488055	0.00342557	0.0022158	0.02831	0.0151991	0.0594708	0.840168	0.00880245	0.00227099	0.00533474	0.00319964
FCA_GND8125922_CAGTCCTTCAAGGCTT	0.0855116	0.0115326	0.0116768	0.0325731	0.0186879	0.0625079	0.722727	0.00363844	0.00812536	0.00389569	0.00434987	0.00245695	0.00961282
FCA_GND8125922_CAGTCCTTCTGCGGCA	0.0132212	0.00707772	0.011196	0.00944749	0.00391328	0.491295	0.114348	0.00241963	0.0479437	0.00304402	0.00273	0.00332731	0.0106776
FCA_GND8125922_CATATGGCAGCTATTG	0.00773093	0.00395112	0.00200932	0.00447442	0.000784672	0.0208648	0.0019245	0.0036269	0.0110232	0.00309503	0.00272794	0.00135754	0.90486
FCA_GND8125922_CATCAAGTCGCCTGTT	0.0798581	0.00587101	0.809071	0.0239156	0.00352206	0.010033	0.0331116	0.00206795	0.00343525	0.00169546	0.00220315	0.00336028	0.00862142
FCA_GND8125922_CATCAGAAGCAGCCTC	0.00639453	0.00806225	0.00462696	0.0053552	0.000994336	0.0145559	0.0126213	0.129952	0.74265	0.0342524	0.0060247	0.0020554	0.00337004
FCA_GND8125922_CATCAGATCCTCGCAT	0.0235783	0.00901564	0.0133419	0.0149371	0.00206616	0.160603	0.0206216	0.0202722	0.625318	0.0200867	0.00387838	0.0024789	0.00332469
FCA_GND8125922_CATCCACCATCACGAT	0.00210016	0.000705337	0.962143	0.00165008	0.0010196	0.00405583	0.00395406	0.000474429	0.0016025	0.000599507	0.00087505	0.00168564	0.0170632
FCA_GND8125922_CATCCACGTATAAACG	0.0115298	0.0104773	0.00693646	0.0110185	0.00242721	0.0533937	0.00738747	0.0196825	0.0650143	0.0233979	0.00464199	0.00395459	0.38514
FCA_GND8125922_CATGACAAGTCCGTAT	0.0791241	0.0605934	0.01312	0.0198348	0.00388306	0.0315431	0.0127587	0.232519	0.359301	0.0721279	0.00589452	0.00395087	0.00639699
FCA_GND8125922_CATTATCGTAAATACG	0.00765267	0.0034551	0.00237792	0.00344877	0.00115413	0.0030457	0.00213028	0.00672193	0.00746148	0.00266043	0.00368643	0.00223714	0.937767
FCA_GND8125922_CATTCGCGTTTAGCTG	0.00410113	0.00415625	0.00233687	0.00492474	0.000850704	0.00856852	0.0038401	0.0832402	0.663199	0.204333	0.00384776	0.00261111	0.00378045
FCA_GND8125922_CCAATCCGTCAGAGGT	0.00562083	0.00276324	0.00373572	0.00313657	0.000662406	0.743125	0.116636	0.00280962	0.0557705	0.00185485	0.00271687	0.00158872	0.00514172
FCA_GND8125922_CCACCTAAGACCACGA	0.0568512	0.0235573	0.00796324	0.0105913	0.00434976	0.0167911	0.0157698	0.0283638	0.0923005	0.0163922	0.00737511	0.00591381	0.649808
FCA_GND8125922_CCACCTAAGAGCTATA	0.00831936	0.00541147	0.00285555	0.00748562	0.000669498	0.00747993	0.00276516	0.00321367	0.0154192	0.00630305	0.00270686	0.00161469	0.91924
FCA_GND8125922_CCACCTAGTGCGCTTG	0.0145039	0.0117571	0.00555884	0.00402813	0.00118059	0.0664397	0.0124586	0.0133249	0.818564	0.00512286	0.00887522	0.00212146	0.00230166
FCA_GND8125922_CCACGGAGTAGCGCAA	0.021036	0.0151307	0.0132587	0.00597585	0.00312924	0.7369	0.110798	0.020306	0.0143216	0.00437271	0.0020948	0.00257325	0.0115551
FCA_GND8125922_CCACTACTCCATGCTC	0.665566	0.0436597	0.0117048	0.045302	0.00379242	0.048566	0.104921	0.00667351	0.0214156	0.00584564	0.00309701	0.00293307	0.0051609
FCA_GND8125922_CCACTACTCTAGCACA	0.0289128	0.0187347	0.0221476	0.0219901	0.00638086	0.20823	0.0216209	0.109339	0.292005	0.110313	0.0633865	0.0070706	0.0313999
FCA_GND8125922_CCAGCGATCCCAAGAT	0.00417145	0.0021887	0.000755577	0.00472101	0.000350052	0.00107045	0.00152295	0.00107047	0.00187938	0.000591583	0.00110574	0.00108977	0.972907
FCA_GND8125922_CCATTCGTCCCATTTA	0.0110779	0.0121552	0.0158243	0.00864371	0.00585369	0.290753	0.0288197	0.0119168	0.173434	0.0114833	0.00866771	0.00842033	0.275211
FCA_GND8125922_CCATTCGTCTCAAGTG	0.00511625	0.00810651	0.0115348	0.00323032	0.00335678	0.645857	0.0253239	0.00362482	0.0682608	0.00522097	0.00367537	0.00363472	0.150694
FCA_GND8125922_CCCAGTTTCATAGCAC	0.0166017	0.0116084	0.017466	0.0189504	0.00702304	0.0799396	0.122081	0.471605	0.077977	0.0714635	0.0247761	0.00746642	0.0198439
FCA_GND8125922_CCCATACGTGGCCCTA	0.00633482	0.00521383	0.00798861	0.00553384	0.00182718	0.0469828	0.0124065	0.0395809	0.648701	0.19068	0.00505234	0.00260724	0.00219528
FCA_GND8125922_CCGGGATAGGGTTTCT	0.00373115	0.0036537	0.00506519	0.00336547	0.00113828	0.0332575	0.00991372	0.0127713	0.862966	0.0188485	0.0113587	0.00184429	0.00249461
FCA_GND8125922_CCGGGATGTAAACACA	0.027896	0.0312005	0.017433	0.0198161	0.00222393	0.109399	0.0102608	0.0330248	0.480302	0.0188149	0.00922794	0.00302444	0.00468992
FCA_GND8125922_CCGGGATGTAAGTAGT	0.0110126	0.00493857	0.00698036	0.00898754	0.0030661	0.0336188	0.0117134	0.0118375	0.030776	0.00954227	0.0261484	0.00252573	0.651632
FCA_GND8125922_CCGTGGATCTGGCGTG	0.0266788	0.020808	0.00841631	0.0165149	0.00154082	0.0562491	0.00725993	0.0255214	0.731526	0.0450332	0.00254867	0.00233864	0.00469038
FCA_GND8125922_CCGTTCAAGCAGACTG	0.00229846	0.00241575	0.00156527	0.00220094	0.000658012	0.00358002	0.00365841	0.0135666	0.937775	0.0171333	0.00062785	0.00142015	0.000869926
FCA_GND8125922_CCTAAAGAGGCTCTTA	0.00938655	0.0104296	0.010488	0.00574272	0.00579651	0.0532017	0.104936	0.0231031	0.672839	0.0450009	0.00474233	0.00392767	0.00824835
FCA_GND8125922_CCTACCACATTGGCGC	0.00971498	0.00236367	0.00279519	0.00308378	0.00113067	0.0039491	0.00210979	0.00577088	0.00569146	0.00578674	0.00846258	0.00149284	0.934715
FCA_GND8125922_CCTACCATCATCGCTC	0.0238151	0.0152685	0.00976513	0.0186651	0.00243034	0.0862825	0.010639	0.0352858	0.0891905	0.0217913	0.0075057	0.00309094	0.571786
FCA_GND8125922_CCTAGCTCACGAAAGC	0.00508717	0.00816367	0.00123467	0.00662218	0.00117026	0.00587189	0.00591272	0.00216141	0.00500041	0.00226621	0.00153359	0.00181955	0.935643
FCA_GND8125922_CCTAGCTCATCACGTA	0.317552	0.0456014	0.0286512	0.0202859	0.0176999	0.102923	0.156815	0.13599	0.0389283	0.0142009	0.00643232	0.00683377	0.0269677
FCA_GND8125922_CCTATTAGTCGACTGC	0.0229664	0.0365335	0.0125591	0.0194601	0.00564289	0.0229664	0.011369	0.00831461	0.0314529	0.0123408	0.00770246	0.00344462	0.760112
FCA_GND8125922_CCTCTGAGTCCGAATT	0.0318495	0.020326	0.00731155	0.0224378	0.00339382	0.0123035	0.0066398	0.00871107	0.0373681	0.0221114	0.00540684	0.00357038	0.733294
FCA_GND8125922_CCTTACGGTAGCGTCC	0.00172062	0.00147569	0.00183745	0.00167982	0.000993794	0.758882	0.166925	0.00130293	0.0160803	0.0011444	0.00184163	0.00144662	0.00907161
FCA_GND8125922_CCTTACGTCCCTAATT	0.00847391	0.00882829	0.00559101	0.00743179	0.00189752	0.024895	0.00649694	0.0363375	0.603874	0.271615	0.00381551	0.00273932	0.00288133
FCA_GND8125922_CCTTCCCAGCAGCGTA	0.0335471	0.0311268	0.00709503	0.0209412	0.00161834	0.0756752	0.0157052	0.0154534	0.549413	0.0177668	0.00357834	0.00330751	0.0063956
FCA_GND8125922_CCTTCCCAGCTAGTGG	0.00343415	0.0017562	0.000935298	0.0339326	0.000737601	0.0202507	0.916335	0.000729057	0.00288655	0.00119314	0.00132741	0.00114277	0.00247094
FCA_GND8125922_CCTTCCCCAGCTGCAC	0.00202711	0.00248151	0.0026974	0.0011042	0.000869051	0.0578586	0.0182809	0.004658	0.871627	0.0041751	0.00283173	0.00268261	0.00291971
FCA_GND8125922_CCTTCCCCAGGTCTCG	0.00830429	0.00380211	0.00778079	0.0109842	0.00200402	0.776457	0.0950907	0.00268989	0.0277606	0.00209022	0.00252835	0.00272535	0.0138749
FCA_GND8125922_CCTTTCTAGGCGATAC	0.00361564	0.00199513	0.00185232	0.00143458	0.000594255	0.0139553	0.00211734	0.00515316	0.924757	0.0064213	0.00121028	0.000957868	0.000718795
FCA_GND8125922_CCTTTCTCAGCAGTTT	0.00677632	0.00547286	0.00432005	0.0112358	0.001148	0.19633	0.737242	0.00166521	0.00798377	0.00154842	0.00173771	0.00351592	0.00416089
FCA_GND8125922_CGACCTTCACGAGGTA	0.000119409	0.000324792	0.000668469	0.000171624	0.000631652	9.57928e-05	0.000165166	0.000137666	0.000152298	0.00023246	0.000438282	0.000513432	0.000133276
FCA_GND8125922_CGACCTTCATTCGACA	0.0144905	0.0121063	0.00996014	0.010261	0.00345377	0.0668757	0.0289565	0.114677	0.585001	0.0184713	0.0740247	0.00553226	0.00920363
FCA_GND8125922_CGAGAAGAGAGGTTAT	0.0382395	0.0188697	0.0393847	0.0126587	0.00565052	0.0211703	0.00716999	0.0317994	0.733147	0.0362812	0.00624095	0.00362592	0.00524286
FCA_GND8125922_CGAGAAGGTGCACCAC	0.0142063	0.012402	0.0108979	0.0106553	0.0029967	0.0774206	0.0206032	0.0122168	0.659005	0.0133228	0.00315788	0.00234658	0.0117703
FCA_GND8125922_CGAGAAGTCGGAAATA	3.42301e-05	8.33401e-05	0.000956535	0.000140192	0.000349861	5.24956e-05	9.15264e-05	0.000179013	0.000123968	0.000165708	0.000651031	0.000503007	0.000190812
FCA_GND8125922_CGAGCACCAGGGAGAG	0.0710582	0.036991	0.0187611	0.13034	0.00843193	0.0697615	0.585346	0.00899966	0.0155961	0.00480874	0.00570758	0.00498262	0.0091865
FCA_GND8125922_CGAGCACTCCAAGTAC	0.00921684	0.00665827	0.00337865	0.00493473	0.00124289	0.0158696	0.00535578	0.0170095	0.0178151	0.0067123	0.00238272	0.00210082	0.818012
FCA_GND8125922_CGAGCACTCTTGCAAG	0.0402778	0.00637673	0.00817004	0.0141488	0.00132045	0.00849365	0.0244973	0.0173842	0.838534	0.0203491	0.00272099	0.00271632	0.00141645
FCA_GND8125922_CGATCGGTCAAACAAG	0.0433361	0.0243887	0.0149035	0.0170116	0.00415388	0.120992	0.0355647	0.035697	0.550429	0.029986	0.00456163	0.00390475	0.0129906
FCA_GND8125922_CGATTGAAGCATCATC	0.00388877	0.0121191	0.00293559	0.00443568	0.000763616	0.0424026	0.012695	0.00810265	0.439997	0.00998132	0.00441614	0.00323075	0.00508074
FCA_GND8125922_CGCCAAGTCGTTTGCC	0.0300002	0.0324968	0.0112224	0.0155777	0.00310351	0.0327076	0.015122	0.0312417	0.180298	0.0389641	0.012059	0.00343524	0.0174478
FCA_GND8125922_CGCGTTTAGAGAGCTC	0.585043	0.0318834	0.0195988	0.0635551	0.0123903	0.0676232	0.169679	0.00530895	0.00891776	0.00320915	0.00362163	0.00290238	0.00610126
FCA_GND8125922_CGCGTTTCAATCCGAT	0.00620389	0.00546183	0.0068128	0.00615751	0.00188413	0.00680918	0.00570107	0.018892	0.00787302	0.0103788	0.00282081	0.00149362	0.896294
FCA_GND8125922_CGCTATCCAGCCTATA	0.345446	0.0123822	0.0230366	0.102329	0.0277993	0.0333637	0.368723	0.00485023	0.00952413	0.0041668	0.00990121	0.00500521	0.0136291
FCA_GND8125922_CGCTATCGTTCGCGAC	0.00378807	0.00252343	0.00377613	0.002829	0.00117461	0.0121088	0.00429034	0.141107	0.760258	0.0469429	0.00137911	0.00157337	0.00368089
FCA_GND8125922_CGCTGGACAGTCCTTC	0.0045428	0.00336326	0.00201698	0.00322073	0.000492585	0.00392813	0.00161354	0.00186921	0.0114967	0.00391555	0.00167312	0.0020019	0.951718
FCA_GND8125922_CGCTTCAAGCGTTCCG	0.0070872	0.00465827	0.00467659	0.00424641	0.00137762	0.00846351	0.00492977	0.00926201	0.831846	0.10227	0.00132459	0.00167316	0.00203601
FCA_GND8125922_CGCTTCATCACGCATA	0.00409296	0.00572201	0.00525524	0.00842235	0.00111145	0.146057	0.739862	0.00614032	0.0153668	0.00462751	0.0106036	0.00241826	0.00473763
FCA_GND8125922_CGCTTCATCTTCTGGC	0.00772962	0.00619209	0.0126432	0.00659955	0.00314843	0.0082244	0.00624131	0.0518556	0.682414	0.0746829	0.0403438	0.0037563	0.00648322
FCA_GND8125922_CGGACACAGTTGTAGA	0.00590718	0.00512699	0.00481459	0.00692424	0.00206835	0.0136987	0.00634418	0.10899	0.254254	0.033746	0.00614411	0.00313863	0.0396334
FCA_GND8125922_CGGACTGAGTAGGCCA	0.00079149	0.00138578	0.0230144	0.00102154	0.000755593	0.00400969	0.00149911	0.00127414	0.00295698	0.00203424	0.000603566	0.00108756	0.953729
FCA_GND8125922_CGGAGCTGTGGCTCCA	0.0004299	0.000376014	0.000427611	0.000644715	0.000330656	0.00170902	0.990326	0.000326926	0.000533527	0.000520845	0.00062337	0.000873848	0.00206623
FCA_GND8125922_CGGAGTCGTTAAAGAC	0.40502	0.0468835	0.0199528	0.0394678	0.00878332	0.0382285	0.216038	0.0155832	0.0750872	0.00885893	0.0196823	0.0164177	0.0126276
FCA_GND8125922_CGGGTCACATTGGTAC	0.00225609	0.00133944	0.915344	0.00445169	0.000934871	0.00142607	0.00462068	0.000613154	0.00101115	0.000687635	0.0018262	0.000975819	0.0580919
FCA_GND8125922_CGGGTCAGTCAACTGT	0.0084677	0.00769095	0.00659601	0.0040991	0.00201735	0.0140068	0.00454428	0.0740581	0.518933	0.326218	0.0136323	0.00212174	0.00315709
FCA_GND8125922_CGGGTCATCAACTCTT	0.00452071	0.0026397	0.00202157	0.00290648	0.00112158	0.013444	0.00147444	0.00271708	0.00632651	0.00349692	0.00590676	0.00139237	0.942214
FCA_GND8125922_CGGTTAATCACCGTAA	0.0483036	0.0237704	0.0162406	0.0126591	0.00292428	0.109069	0.0258549	0.0351953	0.641304	0.0277339	0.0094287	0.00351924	0.00909367
FCA_GND8125922_CGTAGCGAGGCCCTCA	0.191433	0.122764	0.0177227	0.0477052	0.00614277	0.0817364	0.353796	0.0264706	0.0541491	0.00918903	0.00848913	0.00618966	0.0123429
FCA_GND8125922_CGTCAGGGTAATAGCA	0.010666	0.0107085	0.00589981	0.00670893	0.00194373	0.569456	0.00916496	0.00400273	0.0209666	0.00239408	0.00237268	0.0025626	0.214486
FCA_GND8125922_CGTCAGGGTCGACTAT	0.00904933	0.00654373	0.010388	0.0103415	0.0030144	0.400356	0.0382414	0.0165921	0.234818	0.010177	0.051438	0.00396522	0.0370356
FCA_GND8125922_CGTCAGGTCGGAAATA	0.00522393	0.00714645	0.00289055	0.00525254	0.000910398	0.050572	0.026869	0.0232953	0.789307	0.010264	0.00674777	0.00339693	0.00215575
FCA_GND8125922_CGTCCATTCTGAGTGT	0.00221068	0.00261358	0.00184967	0.00209559	0.000558779	0.00327578	0.00267051	0.0388279	0.915273	0.016532	0.000983132	0.00117528	0.000857006
FCA_GND8125922_CGTCTACTCTGGCGTG	0.00439545	0.0069145	0.00330281	0.00309763	0.00114724	0.00552983	0.00260153	0.0187377	0.890913	0.0370086	0.00299634	0.00101165	0.00184633
FCA_GND8125922_CGTGTAAAGACGCTTT	0.00918878	0.00595359	0.00389878	0.00867255	0.001589	0.0743208	0.00621081	0.00582017	0.0281598	0.00673633	0.00368978	0.002182	0.490186
FCA_GND8125922_CGTGTAAAGGGATGGG	0.00970594	0.00889226	0.00301173	0.0042551	0.000865974	0.0180293	0.00466642	0.00592606	0.0125728	0.00363859	0.00179558	0.00196277	0.910464
FCA_GND8125922_CGTGTCTCATCTATGG	0.00457331	0.00206414	0.00210257	0.00381115	0.00205549	0.00448599	0.956006	0.00212996	0.00431922	0.00232186	0.00597372	0.00165624	0.00192522
FCA_GND8125922_CGTTAGAGTAGAGTGC	0.00796405	0.0106702	0.00703423	0.00639175	0.00223857	0.0268806	0.0106822	0.0170876	0.484153	0.015584	0.0380826	0.00332174	0.00868594
FCA_GND8125922_CGTTCTGGTAATAGCA	0.0155884	0.0176971	0.0114544	0.0145116	0.00523988	0.0256054	0.00934373	0.0574629	0.33944	0.0494819	0.418975	0.00438661	0.00497128
FCA_GND8125922_CGTTGGGAGGGTGTTG	0.00549493	0.00549826	0.0038365	0.0172665	0.00158818	0.0223299	0.0455455	0.00703722	0.74038	0.0149388	0.00329627	0.00253899	0.0021686
FCA_GND8125922_CGTTGGGCAAGCGCTC	0.00106296	0.00182437	0.00212572	0.00162323	0.000428851	0.00874469	0.00135912	0.0237386	0.942551	0.00344946	0.000810071	0.00110426	0.00077798
FCA_GND8125922_CGTTGGGGTACAGACG	0.0279277	0.0167259	0.00419945	0.0128324	0.000934851	0.0198184	0.00677119	0.00812697	0.84474	0.0149689	0.00146786	0.00219285	0.00188456
FCA_GND8125922_CTAACTTTCGGTTCGG	0.0111794	0.0067352	0.00410216	0.0109998	0.000840055	0.0714583	0.016529	0.00673766	0.804464	0.014438	0.0031375	0.00182889	0.00516459
FCA_GND8125922_CTAAGACCATCCGGGT	0.00217659	0.00208858	0.00224316	0.0015647	0.000994501	0.00426413	0.00267542	0.0441319	0.671599	0.222994	0.0361029	0.00150723	0.00110164
FCA_GND8125922_CTAAGACGTTGTACAC	0.0430804	0.0198786	0.00896346	0.0180782	0.0031227	0.0125152	0.0125842	0.0750856	0.016474	0.0123322	0.00341769	0.00255731	0.748893
FCA_GND8125922_CTAAGACTCGCGCCAA	0.0084664	0.00245229	0.00238704	0.00286227	0.00102062	0.00359033	0.00156307	0.00353811	0.00492941	0.00258515	0.0110928	0.00170624	0.942714
FCA_GND8125922_CTACACCTCGTCCAGG	0.0329418	0.0209756	0.0178495	0.0155062	0.00537431	0.0441697	0.0178035	0.139791	0.280381	0.274904	0.0160231	0.00506551	0.0187458
FCA_GND8125922_CTACATTAGAGAGCTC	0.0157965	0.00732049	0.00385046	0.0168346	0.00137695	0.522715	0.227572	0.00625735	0.0851956	0.00660331	0.00577279	0.00253026	0.00471075
FCA_GND8125922_CTACATTTCTGCCAGG	0.0290457	0.0141779	0.00641376	0.0187547	0.00226534	0.0467881	0.01664	0.0118541	0.0266042	0.00937222	0.00450065	0.00405231	0.74472
FCA_GND8125922_CTACATTTCTTGAGAC	0.0126496	0.0169384	0.00646659	0.0145917	0.00157099	0.348098	0.0196266	0.00764573	0.266926	0.00499534	0.00523875	0.00240352	0.00662015
FCA_GND8125922_CTACGTCAGTATGACA	0.00390047	0.0037336	0.00700369	0.00543154	0.00323542	0.0133726	0.0286689	0.0266405	0.847389	0.0297664	0.00572678	0.00206785	0.00407356
FCA_GND8125922_CTACGTCCACTTCTGC	0.00620461	0.00951906	0.00370347	0.00614391	0.00233817	0.00725706	0.00302312	0.0254316	0.885048	0.0149694	0.00173834	0.00127802	0.00197514
FCA_GND8125922_CTCACACGTCGAACAG	0.0112057	0.0106903	0.0128229	0.0158395	0.00687325	0.0439124	0.0157056	0.00844499	0.0424014	0.0148158	0.0153041	0.00563455	0.718253
FCA_GND8125922_CTCAGAATCTCGTATT	0.000154109	0.000148731	0.000164728	0.000204731	0.000334003	0.000634192	0.994314	0.000672377	0.000169582	0.000457356	0.00116641	0.000539403	0.000289794
FCA_GND8125922_CTCGAAAAGAAGGGTA	0.00690431	0.00556551	0.00909455	0.0097283	0.0111023	0.0212859	0.00836982	0.0153756	0.769436	0.0565611	0.0372629	0.00271288	0.00760241
FCA_GND8125922_CTCGGAGTCTATCCTA	0.0009074	0.001324	0.000586779	0.00113064	0.000330366	0.00118137	0.000857161	0.00125134	0.000916218	0.00135726	0.00079393	0.00061662	0.98501
FCA_GND8125922_CTCGGGAGTAGAGGAA	0.0332209	0.00584897	0.617518	0.0161306	0.00745951	0.0469545	0.0461031	0.00590579	0.0264653	0.00509428	0.00441308	0.00360896	0.13674
FCA_GND8125922_CTCGGGATCTGAGTGT	0.00284043	0.00226099	0.002249	0.00144657	0.000553702	0.00388746	0.00272287	0.102545	0.864753	0.00796401	0.0011767	0.00118057	0.000975918
FCA_GND8125922_CTCTAATAGATAGTCA	0.00341663	0.00241722	0.0018743	0.00454045	0.000683359	0.00183432	0.00116671	0.00166585	0.00241494	0.00131426	0.000886879	0.00132461	0.965817
FCA_GND8125922_CTCTAATAGGTCGGAT	0.00290098	0.00362712	0.00268503	0.00240501	0.000868669	0.00913796	0.00543427	0.00733824	0.93009	0.0151979	0.00108501	0.00157973	0.00156931
FCA_GND8125922_CTCTAATCAGCATACT	0.00261634	0.00227493	0.00167878	0.00253551	0.000895438	0.0048366	0.00475724	0.0934471	0.865401	0.00734753	0.00113559	0.00382955	0.00131585
FCA_GND8125922_CTCTAATTCACAGGCC	0.00881535	0.0139377	0.0105821	0.00501278	0.00356563	0.0357243	0.01581	0.0101251	0.758299	0.0160099	0.00362506	0.00368291	0.0108141
FCA_GND8125922_CTGAAACGTCGACTAT	0.00498947	0.00653895	0.00595077	0.00271471	0.00134719	0.00613821	0.0040195	0.113242	0.735703	0.0892894	0.00166541	0.00159795	0.00424978
FCA_GND8125922_CTGAAACGTGCACTTA	0.00678172	0.00694286	0.00346479	0.00538082	0.000756017	0.0184671	0.00747732	0.0179722	0.867255	0.0342621	0.00227852	0.0017984	0.00237968
FCA_GND8125922_CTGATCCAGAGGTAGA	0.000190462	0.000316823	0.0028752	0.000261875	0.000224039	0.00104301	0.000198664	0.000249352	0.000577696	0.000386007	0.000594681	0.00091217	0.991129
FCA_GND8125922_CTGCCTATCTCGAGTA	0.178441	0.0704325	0.0203727	0.0212416	0.00281616	0.237015	0.0233817	0.0245274	0.360855	0.0172972	0.00435757	0.00321116	0.00549613
FCA_GND8125922_CTGCGGAAGATCCGAG	0.00284498	0.00176642	0.0315974	0.00458887	0.000602426	0.00419764	0.0028109	0.00192022	0.00219132	0.00151622	0.000691748	0.00100765	0.938393
FCA_GND8125922_CTGCTGTGTCTGCGGT	0.00370851	0.00368432	0.00710103	0.00348498	0.000897201	0.00635322	0.00287844	0.0131372	0.80451	0.102339	0.0019313	0.00121002	0.00152906
FCA_GND8125922_CTGCTGTGTGTGAATA	0.00729981	0.00376649	0.00356572	0.00558573	0.00205611	0.00327602	0.955269	0.00137927	0.00375876	0.00153096	0.00272065	0.00161689	0.000949681
FCA_GND8125922_CTGTGCTCAATGGAGC	0.000159914	0.000278527	0.000273979	0.000491149	0.000333005	0.000510884	0.994021	0.000285433	0.000278988	0.000232751	0.00110957	0.000409386	0.000259174
FCA_GND8125922_CTTACCGGTGTGAATA	0.0148189	0.0012963	0.00150741	0.003354	0.000691959	0.00308864	0.962698	0.000878072	0.00189902	0.000896583	0.00136031	0.00140496	0.0015977
FCA_GND8125922_CTTACCGTCATCGCTC	0.00441627	0.0091185	0.0068324	0.00494207	0.00249239	0.0184617	0.00865069	0.0303807	0.0455856	0.830035	0.0058187	0.00498838	0.00514367
FCA_GND8125922_CTTCTCTTCACCGTAA	0.00289944	0.00200045	0.00214696	0.00142579	0.000522437	0.00535835	0.00264678	0.0667238	0.86314	0.0459161	0.00111437	0.00107681	0.00100669
FCA_GND8125922_CTTTGCGCAGCCACCA	0.0156215	0.0089668	0.00977763	0.0122732	0.00353219	0.167476	0.051246	0.0312228	0.29422	0.0157739	0.286492	0.00610194	0.0104762
FCA_GND8125922_CTTTGCGCATCGATGT	0.347027	0.0243657	0.0143931	0.0279603	0.00736068	0.0508242	0.415374	0.0153692	0.044493	0.00426126	0.00281942	0.00557666	0.00809764
FCA_GND8125922_GAAACTCAGAAGCCCA	0.00994891	0.00413535	0.00669393	0.00613051	0.00232975	0.027591	0.00988451	0.0789411	0.620311	0.205601	0.00369928	0.0031627	0.00205124
FCA_GND8125922_GAAACTCTCCTTCAAT	0.0128747	0.00782434	0.00440198	0.0189994	0.00125756	0.0416173	0.866632	0.00259073	0.0142787	0.00225278	0.00211787	0.00242352	0.00369827
FCA_GND8125922_GAACATCGTACCATCA	0.00538959	0.00536043	0.00417049	0.00451791	0.000898035	0.271931	0.0637053	0.00230976	0.0176105	0.00252746	0.00230711	0.00163012	0.007158
FCA_GND8125922_GAACCTACAGTATCTG	0.00612295	0.0035943	0.00429782	0.00340481	0.00108458	0.0140456	0.00780425	0.0274156	0.839029	0.021015	0.00266844	0.00136747	0.00364132
FCA_GND8125922_GAAGCAGCACAGGTTT	0.00188228	0.00286414	0.00179082	0.00113994	0.000523787	0.00525622	0.00267133	0.0412338	0.920489	0.00938204	0.00289626	0.00162562	0.000599582
FCA_GND8125922_GAATGAAGTAGTAGTA	0.00127596	0.00141853	0.000788179	0.00133214	0.000386626	0.00185539	0.000970506	0.00325462	0.00228418	0.0021795	0.00136636	0.000794713	0.976913
FCA_GND8125922_GACACGCAGAGGTTAT	0.0129653	0.00811397	0.00825719	0.00737597	0.00383095	0.0417015	0.0525099	0.0290592	0.0643962	0.00935369	0.0202524	0.00249002	0.0066187
FCA_GND8125922_GACAGAGGTACTCGCG	0.119856	0.0531738	0.0233186	0.0446124	0.00525631	0.0742199	0.0353317	0.0346176	0.243007	0.0115665	0.0110726	0.00537868	0.0534076
FCA_GND8125922_GACCAATTCACCGGGT	0.00387234	0.00435223	0.00337627	0.00684057	0.00122093	0.0143381	0.00360429	0.0483342	0.730172	0.0272025	0.00315625	0.00197681	0.00624703
FCA_GND8125922_GACGGCTCATGGATGG	0.00180276	0.00624581	0.0015099	0.00451782	0.0010064	0.00403971	0.00303463	0.0133044	0.823439	0.00767455	0.00180235	0.00167266	0.00162599
FCA_GND8125922_GACGTGCTCTGCAGTA	0.0123619	0.0190755	0.00654031	0.00716389	0.00222992	0.0240829	0.00760091	0.0450293	0.672474	0.129434	0.00997263	0.00457183	0.00520848
FCA_GND8125922_GACTAACGTCTTCTCG	0.311351	0.138335	0.0133558	0.0585871	0.00239092	0.137726	0.235344	0.0045864	0.0223735	0.00402441	0.00321308	0.00557793	0.00726746
FCA_GND8125922_GATCGCGGTACGCACC	0.0184371	0.0137366	0.0101091	0.0119718	0.00452097	0.0168227	0.893071	0.00301968	0.00486199	0.0031552	0.00165423	0.00207947	0.00345717
FCA_GND8125922_GATCGCGGTCGGCACT	0.00416387	0.00272055	0.00564296	0.00284124	0.00227394	0.00651378	0.00324769	0.0461332	0.0702244	0.83571	0.00640171	0.00195082	0.00196783
FCA_GND8125922_GATCGCGTCTTCAACT	0.00797935	0.0157746	0.00566219	0.0128404	0.0020891	0.858645	0.0293536	0.0022369	0.0257131	0.00263658	0.00253259	0.00245438	0.00293394
FCA_GND8125922_GATCGTATCAGGCCCA	0.0111443	0.00551484	0.0086959	0.00551138	0.00352206	0.061773	0.0106622	0.0274475	0.403435	0.0238407	0.00269829	0.00212476	0.00570511
FCA_GND8125922_GATGAAAAGCTACCTA	0.00787078	0.00715315	0.00736979	0.00653476	0.00297016	0.00797546	0.00683583	0.0338602	0.0468194	0.850624	0.00678681	0.00276527	0.00196604
FCA_GND8125922_GATGAAATCCCAACGG	0.0493831	0.0288877	0.0200862	0.00999537	0.00532764	0.0573048	0.0168973	0.0884931	0.502511	0.166251	0.00552357	0.00440648	0.00951352
FCA_GND8125922_GATTCAGAGTTAACGA	1.34881e-05	4.16163e-05	0.000544773	8.14765e-05	0.000205641	3.50835e-05	6.51057e-05	7.40956e-05	0.000106499	0.00015096	0.000462895	0.000246264	9.18743e-05
FCA_GND8125922_GATTCAGCACAACGCC	0.00392404	0.00841896	0.00576965	0.00479513	0.00241223	0.0241145	0.0265824	0.0300104	0.828832	0.0130208	0.0186697	0.00188206	0.00659158
FCA_GND8125922_GCAATCACATATGGTC	0.0140349	0.00903061	0.0134773	0.00465156	0.00142768	0.0353126	0.012922	0.0192815	0.849791	0.0126482	0.00209306	0.00160901	0.00319865
FCA_GND8125922_GCACATAAGAGCTGCA	0.0119023	0.00208015	0.00349771	0.00288877	0.00125688	0.0179477	0.00579306	0.0210714	0.746551	0.0389227	0.00392533	0.00150452	0.0017789
FCA_GND8125922_GCACTCTCACCATGTA	0.0199138	0.0515195	0.0158913	0.0208087	0.0130505	0.0841473	0.0334788	0.0136508	0.0522714	0.0202957	0.0167175	0.0090648	0.502558
FCA_GND8125922_GCAGCCAAGAACTGTA	0.00929337	0.00368702	0.00405584	0.00377318	0.00136448	0.0192197	0.0046198	0.0145412	0.903903	0.0115361	0.00285516	0.00127464	0.00176327
FCA_GND8125922_GCAGCCACACACGCTG	0.00832645	0.0188409	0.0047178	0.00562708	0.000762985	0.0221696	0.0107386	0.0119201	0.87008	0.00832816	0.0012471	0.00148992	0.00254549
FCA_GND8125922_GCAGTTACAACCGCCA	0.014958	0.0207979	0.00918199	0.0156466	0.0016513	0.297631	0.0720762	0.0127564	0.260157	0.0131981	0.0209679	0.00317798	0.00614575
FCA_GND8125922_GCAGTTATCTCGAGTA	0.0270293	0.0205154	0.0159779	0.0156007	0.00391245	0.0344345	0.0198562	0.325636	0.0651992	0.181204	0.0709033	0.00575114	0.0129997
FCA_GND8125922_GCATACACACGGACAA	0.00114637	0.00200059	0.00131472	0.0019292	0.00044964	0.0123805	0.00193678	0.00338857	0.0324082	0.00394357	0.0078094	0.000907629	0.0028321
FCA_GND8125922_GCATGCGAGGCGATAC	0.00470743	0.0042482	0.00247877	0.00754245	0.00185189	0.472088	0.00750802	0.000941126	0.00392374	0.000686961	0.00164976	0.00184441	0.0266685
FCA_GND8125922_GCATGTATCCATGAGT	0.00973532	0.0201344	0.00364768	0.00744756	0.00200561	0.0178906	0.00910679	0.0565123	0.654378	0.0171382	0.00615222	0.00343797	0.00327617
FCA_GND8125922_GCCAAATCATCGGTTA	0.169961	0.0082985	0.00850027	0.0375995	0.00446363	0.0227785	0.675493	0.0205517	0.00638612	0.00481587	0.00374208	0.00270246	0.00799391
FCA_GND8125922_GCCAAATTCCTAGTGA	0.00604859	0.00651212	0.00468669	0.00719081	0.00238883	0.0575053	0.0689938	0.0146318	0.719327	0.0173117	0.00287228	0.00322437	0.00410297
FCA_GND8125922_GCCTCTAAGACAGAGA	0.00344604	0.00309092	0.00245969	0.00215142	0.000932235	0.0337564	0.0118392	0.0137601	0.867603	0.00881127	0.00132605	0.00154912	0.00217479
FCA_GND8125922_GCCTCTAAGTGTACTC	0.00390016	0.00731589	0.00389422	0.00726698	0.00105695	0.0790748	0.0567889	0.0104674	0.664075	0.00412263	0.00300828	0.00602463	0.00433287
FCA_GND8125922_GCCTCTACATGAAGTA	0.0137003	0.0109428	0.00592479	0.00973052	0.00144343	0.0600604	0.0171146	0.0124109	0.113653	0.0138034	0.00505519	0.00197351	0.0138078
FCA_GND8125922_GCGAGAAAGTGCCATT	0.334517	0.0639559	0.026795	0.112631	0.0358864	0.0462811	0.276162	0.00684602	0.0238002	0.00685739	0.00540983	0.00881393	0.00723027
FCA_GND8125922_GCGCAGTCATGACATC	0.00780897	0.00981567	0.00309228	0.00877812	0.00154989	0.0411864	0.0110644	0.0100472	0.357238	0.012035	0.00332512	0.00245218	0.00355239
FCA_GND8125922_GCGCCAAAGGCTACGA	0.00972172	0.00768966	0.00980189	0.00816716	0.0271228	0.0259388	0.885805	0.00146985	0.00331724	0.00150102	0.00143723	0.00326118	0.00528597
FCA_GND8125922_GCGCCAAGTAACGTTC	0.0129707	0.00570274	0.00526548	0.0301799	0.00114489	0.00268835	0.930181	0.000929633	0.00108712	0.000703071	0.000894358	0.00166131	0.00161659
FCA_GND8125922_GCTCTGTAGCTCTCGG	0.00332029	0.00339338	0.00381013	0.00264587	0.000655904	0.0132225	0.00398871	0.0295456	0.882569	0.0293364	0.00117326	0.00131174	0.00113374
FCA_GND8125922_GCTGCAGCAGGCAGTA	0.00172597	0.00113402	0.00150394	0.00106812	0.000409357	0.00758778	0.00490425	0.00151182	0.908502	0.0114503	0.00169396	0.00128548	0.00071334
FCA_GND8125922_GCTGCTTCAGGGAGAG	0.00130494	0.00242146	0.000998358	0.00524707	0.000900981	0.0494305	0.012214	0.00190077	0.0278392	0.00178162	0.00502434	0.00129319	0.00184957
FCA_GND8125922_GCTGCTTGTCTAGTGT	0.241523	0.0933228	0.0427399	0.0298758	0.0062826	0.0559645	0.0173039	0.061743	0.237168	0.0468377	0.0123487	0.0058462	0.0121514
FCA_GND8125922_GCTGGGTAGGGTCTCC	0.0117757	0.0113034	0.00803168	0.0106095	0.00297574	0.0397408	0.0162597	0.177015	0.547364	0.0514936	0.00534247	0.00366039	0.00458802
FCA_GND8125922_GGAAAGCCAGCTATTG	0.00195381	0.00188428	0.00242515	0.00378205	0.000855505	0.0994974	0.00724965	0.00267556	0.339401	0.00317721	0.00427271	0.00158414	0.00284296
FCA_GND8125922_GGACAAGAGGATGTAT	0.015468	0.0186079	0.00619331	0.00545267	0.00151717	0.0108553	0.00428927	0.0463617	0.777553	0.0484698	0.00429224	0.00210406	0.00445931
FCA_GND8125922_GGACAAGTCTGCCAGG	0.0186294	0.0106798	0.0078252	0.0175436	0.00204471	0.0977954	0.0493304	0.0174194	0.512942	0.0197848	0.0270444	0.00297809	0.00676477
FCA_GND8125922_GGACAGAAGGAGTACC	0.0462838	0.0177772	0.0161727	0.0265522	0.00685771	0.0448066	0.0216608	0.0315779	0.0718307	0.0204272	0.0147639	0.00418643	0.325813
FCA_GND8125922_GGACAGACATGATCCA	0.00363076	0.00297127	0.00373296	0.00349853	0.00192245	0.00618126	0.00425284	0.0688539	0.735655	0.14598	0.00881807	0.00189861	0.00256562
FCA_GND8125922_GGACATTAGCCTATGT	0.00548082	0.00293311	0.00347769	0.00210985	0.00080031	0.0217358	0.00350524	0.020624	0.875124	0.0113679	0.00326479	0.0012385	0.00354476
FCA_GND8125922_GGACATTAGTCAATAG	0.0164221	0.0104755	0.00364027	0.0102628	0.00164085	0.126406	0.0735236	0.00943123	0.352969	0.00502735	0.00626948	0.00497666	0.00408712
FCA_GND8125922_GGACATTTCGGTCTAA	0.00684139	0.00348314	0.00291631	0.00345284	0.00109575	0.0134739	0.00448935	0.151607	0.784957	0.0128201	0.00233879	0.00176555	0.00158353
FCA_GND8125922_GGACGTCCACAACGCC	0.00219593	0.00173989	0.0170107	0.00244671	0.000647657	0.00347989	0.000916052	0.000448733	0.00170019	0.000628901	0.000534874	0.00126353	0.963062
FCA_GND8125922_GGACGTCTCTGACCTC	0.00136383	0.00121704	0.000858727	0.00173279	0.000535805	0.0222553	0.00130301	0.00160933	0.0029934	0.00101587	0.00246468	0.00118587	0.951166
FCA_GND8125922_GGAGCAAGTCGCGGTT	0.0157938	0.010084	0.00879458	0.00999135	0.00145931	0.0235687	0.00712943	0.015982	0.817779	0.0370192	0.00257393	0.00258573	0.00208155
FCA_GND8125922_GGATGTTCAGCTGCAC	0.405585	0.0564219	0.0426493	0.0402193	0.00803905	0.105484	0.222602	0.00825337	0.0235688	0.00722517	0.00542005	0.00619116	0.0138577
FCA_GND8125922_GGCAATTCATAGACTC	0.00550424	0.00543994	0.00395264	0.00200867	0.000937371	0.0108882	0.00971367	0.0250098	0.908218	0.00548346	0.00369422	0.00217341	0.00234937
FCA_GND8125922_GGCCGATAGCGTAGTG	0.00213838	0.00232035	0.00246735	0.00224659	0.00100991	0.0569202	0.00280467	0.00246424	0.00254297	0.00240841	0.0024214	0.00145078	0.85264
FCA_GND8125922_GGCGACTAGTGGTAAT	0.00921502	0.0061582	0.00905189	0.00698151	0.00240556	0.273114	0.0202544	0.00798268	0.0177293	0.00432104	0.00286039	0.00266896	0.48039
FCA_GND8125922_GGCGACTCACCTTGTC	0.00543844	0.00787573	0.00530598	0.00525289	0.00136513	0.150075	0.0430658	0.0110652	0.692142	0.00548085	0.00338517	0.00282629	0.00489624
FCA_GND8125922_GGCGACTTCTTGCATT	0.0279236	0.0128397	0.0411378	0.0152403	0.00982718	0.0241055	0.0236415	0.538062	0.0758224	0.115078	0.0343005	0.00816128	0.0252532
FCA_GND8125922_GGCGTGTGTAAGTAGT	0.000361633	0.000606646	0.000741943	0.000833783	0.000603575	0.0071081	0.984535	0.000373093	0.000603626	0.000398891	0.000757887	0.000690281	0.000617831
FCA_GND8125922_GGCTGGTTCTGCTGTC	0.001817	0.00222124	0.00176407	0.00261902	0.00094159	0.00609234	0.00378064	0.013521	0.488317	0.018141	0.0582436	0.0016083	0.0020098
FCA_GND8125922_GGGACCTTCGCCAGCA	0.00349377	0.0024818	0.00171178	0.00182818	0.000925784	0.00495885	0.00143172	0.0645663	0.845867	0.0579111	0.00166072	0.00193989	0.00152552
FCA_GND8125922_GGGAGATTCCAAGCCG	0.00422458	0.0046959	0.00254138	0.00892091	0.00112713	0.0497602	0.0215609	0.00696855	0.592764	0.00610332	0.0085031	0.00200262	0.00264522
FCA_GND8125922_GGGATGAGTAAGTGGC	0.0326308	0.0122269	0.526164	0.0143551	0.00286025	0.0874849	0.0113561	0.0086606	0.0332147	0.00685066	0.00440346	0.00606885	0.231339
FCA_GND8125922_GGGCATCGTCCAGTAT	0.0155346	0.00946616	0.00784635	0.0050946	0.00401303	0.0221301	0.0132517	0.160904	0.585721	0.127461	0.00953759	0.00255161	0.0107309
FCA_GND8125922_GGGTTGCCAAGCCGCT	0.00648729	0.00747301	0.00385632	0.00805869	0.00100498	0.101552	0.00784974	0.00700138	0.0922564	0.00367434	0.00373428	0.00172601	0.0228938
FCA_GND8125922_GGGTTGCTCCCAGGTG	0.0263666	0.0273748	0.0186114	0.0269438	0.00460195	0.07856	0.0191739	0.0614262	0.37434	0.178158	0.0738002	0.00557446	0.0146953
FCA_GND8125922_GGTATTGCAGGCAGTA	0.0296343	0.0625069	0.00695542	0.0323502	0.00389335	0.0189239	0.790927	0.00341008	0.010646	0.00229148	0.00328443	0.00388827	0.002828
FCA_GND8125922_GGTGAAGGTCACTTCC	0.0132008	0.0040906	0.00292444	0.00451987	0.00206312	0.0123405	0.00426624	0.00687077	0.0101807	0.00839023	0.0180045	0.00182799	0.889703
FCA_GND8125922_GGTGCGTAGTGCAAGC	0.00696446	0.00759458	0.00450683	0.010514	0.0012113	0.374398	0.225118	0.00891932	0.0791161	0.00440912	0.00556452	0.00294876	0.00561814
FCA_GND8125922_GGTGTTAAGCCACTAT	0.027795	0.0249068	0.0123055	0.0158231	0.00336992	0.159982	0.0546578	0.00856409	0.253782	0.00483529	0.00491265	0.00343765	0.0109009
FCA_GND8125922_GGTGTTAAGCGTGAGT	0.102612	0.0839437	0.0210875	0.036346	0.0073791	0.150161	0.300322	0.106992	0.0468286	0.0146441	0.00825251	0.00786382	0.0133557
FCA_GND8125922_GGTGTTACAAAGGAAG	0.0482724	0.0113118	0.0072775	0.00840596	0.00230102	0.0161741	0.00757189	0.163942	0.659056	0.0326834	0.00249002	0.00288577	0.00418538
FCA_GND8125922_GTACTCCTCACTCCTG	0.0270745	0.0286574	0.00698771	0.0221365	0.00145539	0.0498984	0.009895	0.0100244	0.702753	0.0129458	0.00252022	0.00233845	0.00392828
FCA_GND8125922_GTACTTTGTACAGCAG	0.0145929	0.0114121	0.0840543	0.00693807	0.00316008	0.0391469	0.0106873	0.0144292	0.0177364	0.00573543	0.00241595	0.00377301	0.752431
FCA_GND8125922_GTAGGCCCACGTCTCT	0.0159952	0.0130532	0.00347616	0.0145079	0.00220814	0.290267	0.00901261	0.00451893	0.0388128	0.00513704	0.00306993	0.00195511	0.0129106
FCA_GND8125922_GTAGGCCGTCAGAATA	0.0075833	0.00579601	0.00382388	0.0040631	0.00175607	0.00569229	0.00514548	0.0921316	0.754799	0.103438	0.000988308	0.00171106	0.00173629
FCA_GND8125922_GTAGTCAAGCCGTCGT	0.00682169	0.0101496	0.00518884	0.00531086	0.00210589	0.119521	0.0297935	0.0357555	0.683425	0.00523969	0.0103439	0.00515539	0.00928036
FCA_GND8125922_GTATCTTTCTACCAGA	0.0264949	0.0504637	0.0230436	0.0231118	0.00376317	0.600412	0.124157	0.00880614	0.0516544	0.00613504	0.00491055	0.00518431	0.0103344
FCA_GND8125922_GTATTCTGTCCATGAT	0.0109814	0.00688733	0.00367837	0.00355907	0.000726739	0.00612499	0.002943	0.0256807	0.815103	0.110874	0.00179607	0.00138691	0.0015208
FCA_GND8125922_GTATTCTTCGCCTGAG	0.00121209	0.00163058	0.00397932	0.00130721	0.000654455	0.00244443	0.00127793	0.00666861	0.898058	0.0731234	0.00444632	0.000836949	0.000692939
FCA_GND8125922_GTCAAGTCAGCAGTTT	0.0190822	0.0131241	0.0134243	0.0138517	0.0043084	0.458243	0.0859498	0.0172383	0.153778	0.0158029	0.0767215	0.00558945	0.0120662
FCA_GND8125922_GTCACAATCCCGACTT	0.00480461	0.00587935	0.00296743	0.00527041	0.002877	0.00575575	0.0035995	0.0557683	0.814629	0.0656463	0.00584502	0.00178584	0.00137041
FCA_GND8125922_GTCACGGAGCATGGCA	0.000990884	0.000728689	0.00043957	0.0011827	0.000954875	0.00102401	0.988436	0.00037054	0.000492906	0.000482439	0.00147182	0.00116761	0.000383125
FCA_GND8125922_GTCATTTGTATAGGTA	0.0536614	0.00650733	0.0151132	0.00424786	0.00353413	0.0470665	0.0135204	0.0449891	0.712673	0.0426675	0.00444701	0.00236926	0.00808087
FCA_GND8125922_GTCGGGTCAAGTTCTG	0.00281823	0.00213499	0.000930386	0.0022428	0.000655678	0.00312705	0.0014092	0.003507	0.00262938	0.00263944	0.00112072	0.000849005	0.966049
FCA_GND8125922_GTCGTAAAGAGACTTA	0.00257607	0.00177308	0.00136946	0.00183446	0.000645402	0.00268904	0.00143379	0.00787402	0.00326214	0.00484738	0.00253868	0.00124469	0.960488
FCA_GND8125922_GTCTTCGCAAGCGATG	0.00919992	0.00522277	0.0041922	0.00359111	0.00103813	0.035227	0.0129136	0.042835	0.83606	0.011864	0.0115133	0.0025645	0.00455784
FCA_GND8125922_GTGAAGGAGTTGAGTA	0.000366766	0.000666034	0.00159985	0.000729723	0.000531252	0.000362305	0.000443587	0.000355154	0.000303323	0.000718555	0.00073014	0.0029547	0.000333451
FCA_GND8125922_GTGAAGGGTAGCGATG	0.00205102	0.00517986	0.00472487	0.00346325	0.00579694	0.00156516	0.00224555	0.00105576	0.00469066	0.00186424	0.0037017	0.00890799	0.0020382
FCA_GND8125922_GTGCAGCAGCGCTTAT	0.0120682	0.00954327	0.00662653	0.00543744	0.00119678	0.0153248	0.00374545	0.0203197	0.856653	0.0498116	0.00164979	0.00164651	0.00178075
FCA_GND8125922_GTGCAGCAGTGGACGT	0.0183776	0.00801131	0.367892	0.0138134	0.00574424	0.243285	0.0393616	0.0482134	0.0360567	0.0130544	0.00700003	0.00560207	0.133661
FCA_GND8125922_GTGCATAGTAAGGGAA	0.0120409	0.00592574	0.00782974	0.00824585	0.00234391	0.021036	0.00473701	0.04021	0.143973	0.0633148	0.00933557	0.00181373	0.0384188
FCA_GND8125922_GTGCATAGTCGAAAGC	0.0270886	0.00776765	0.0297019	0.00791575	0.00592276	0.0231665	0.00591222	0.0348483	0.786561	0.0172046	0.0115738	0.00257886	0.00439773
FCA_GND8125922_GTGCATATCCTGCTTG	0.00587344	0.00391154	0.00387312	0.00332977	0.00140295	0.00819892	0.00348436	0.286379	0.528733	0.12933	0.004385	0.00192851	0.00356304
FCA_GND8125922_GTGCGGTCATCAGTCA	0.0231866	0.0186816	0.0140944	0.0268972	0.00399004	0.209574	0.0595464	0.0182473	0.156939	0.0144046	0.250949	0.00599903	0.014842
FCA_GND8125922_GTGCTTCAGTCATCCA	0.00971695	0.00616563	0.00772242	0.00938393	0.00281854	0.0275532	0.00861887	0.0240304	0.126549	0.0156176	0.0106442	0.00499861	0.679431
FCA_GND8125922_GTGGGTCTCTCTTGAT	0.00807911	0.00574542	0.00524695	0.00454798	0.00196114	0.0332211	0.00928846	0.0395338	0.59425	0.0243993	0.248035	0.00378979	0.00645225
FCA_GND8125922_GTGTGCGAGAGCTATA	0.0118947	0.0187987	0.00577892	0.0163263	0.00297062	0.138532	0.0570183	0.0128346	0.417292	0.00669485	0.00596289	0.00515049	0.00663097
FCA_GND8125922_GTGTGCGAGATCCCAT	0.0156472	0.012149	0.00721214	0.00671627	0.00185387	0.0414805	0.0148856	0.150963	0.642543	0.0801385	0.00447719	0.003012	0.00347341
FCA_GND8125922_GTGTTAGGTCCCTACT	0.0084694	0.00818384	0.00190442	0.0165143	0.00394141	0.00319906	0.917883	0.00237584	0.00348963	0.00110841	0.00375436	0.00123301	0.00185335
FCA_GND8125922_GTGTTAGGTGCAACTT	0.0689854	0.0493419	0.0313297	0.0433336	0.00524675	0.390925	0.0308958	0.0162594	0.268114	0.0104326	0.00647725	0.00383089	0.00792034
FCA_GND8125922_GTTAAGCGTTAGGGTG	0.00630257	0.00267431	0.00557959	0.00137187	0.00152236	0.00340833	0.00244099	0.0923035	0.798021	0.0573116	0.0105124	0.00152068	0.00114359
FCA_GND8125922_GTTACAGAGTATCGAA	0.0299951	0.00857688	0.0072755	0.021776	0.00271717	0.00426951	0.004231	0.00264157	0.00820081	0.0030596	0.00321627	0.00185146	0.88312
FCA_GND8125922_GTTACAGAGTGGTAAT	0.0119444	0.00895682	0.0145561	0.00580069	0.00205682	0.026256	0.00961116	0.0454272	0.627722	0.220893	0.00386984	0.00227653	0.00241339
FCA_GND8125922_GTTCTCGTCAGTTAGC	0.0110273	0.00916212	0.00547449	0.00556116	0.00217893	0.0158439	0.0151615	0.0195375	0.86611	0.0143468	0.00297604	0.00261909	0.00220703
FCA_GND8125922_GTTCTCGTCTACCAGA	0.00085049	0.00038184	0.000917619	0.000784441	0.000361632	0.0032743	0.000631431	0.0119459	0.929312	0.0433194	0.001439	0.000955992	0.000617633
FCA_GND8125922_GTTTCTAAGATGCCTT	0.240583	0.0247821	0.04978	0.121335	0.0702175	0.137073	0.220005	0.00882683	0.0253161	0.00781449	0.0127482	0.0084633	0.0135192
FCA_GND8125922_GTTTCTACAAACCCAT	0.00193902	0.00184132	0.00228724	0.00280183	0.000901176	0.761578	0.0231047	0.00197977	0.0489165	0.00176818	0.015653	0.00157966	0.00314266
FCA_GND8125922_GTTTCTATCTGTCTAT	0.0103851	0.00962397	0.00748027	0.00709738	0.00210718	0.0958875	0.00617101	0.0366047	0.764944	0.0147368	0.00331014	0.00253114	0.00580632
FCA_GND8125922_TAAACCGAGATAGCAT	0.0251743	0.0207917	0.0135395	0.0138256	0.00450541	0.0449073	0.0156016	0.0685641	0.305634	0.103146	0.281047	0.00733277	0.00829697
FCA_GND8125922_TAAACCGCAGGAATGC	0.0170693	0.010373	0.00838669	0.0146044	0.00306867	0.199832	0.0201663	0.00749337	0.0345719	0.00710567	0.0114724	0.00443112	0.575359
FCA_GND8125922_TAAACCGTCATTCACT	0.010909	0.00572784	0.00507006	0.00905618	0.00266526	0.00756126	0.0111901	0.0746356	0.785902	0.0557644	0.00182938	0.00188929	0.0042836
FCA_GND8125922_TAAGAGACAGGATTGG	0.0185425	0.0235616	0.00892728	0.0169687	0.00180096	0.506454	0.0603726	0.0697123	0.0926918	0.01609	0.0058196	0.0033848	0.0122996
FCA_GND8125922_TACACGATCTTGCCGT	0.0023997	0.00283722	0.00146625	0.00261842	0.000618356	0.0257816	0.00370346	0.00764953	0.866032	0.0144869	0.00796146	0.00113253	0.00134803
FCA_GND8125922_TACAGTGAGTCAAGCG	0.0141315	0.00756574	0.0103469	0.0100112	0.00400416	0.0291328	0.009715	0.0308621	0.150611	0.0422506	0.273717	0.00486941	0.0409213
FCA_GND8125922_TACAGTGGTCGGCACT	0.0641478	0.02027	0.0185027	0.0139993	0.00319962	0.0186407	0.0154452	0.0344703	0.6212	0.0993895	0.00636665	0.00275985	0.00260865
FCA_GND8125922_TACCTTACAAGTCTAC	0.0263145	0.00865896	0.0026232	0.014176	0.00141306	0.0118355	0.00669276	0.00664518	0.0153163	0.00780482	0.00769105	0.00514591	0.855949
FCA_GND8125922_TACCTTACACGGTAAG	0.0146223	0.00634965	0.423218	0.0113139	0.00169209	0.0389806	0.0165169	0.00419106	0.00992935	0.00281172	0.00181554	0.00312208	0.450973
FCA_GND8125922_TACCTTATCGCCAAAT	0.0713333	0.0280824	0.020261	0.116331	0.028765	0.0307595	0.630072	0.00617437	0.0224115	0.00501838	0.00598765	0.00429189	0.00581457
FCA_GND8125922_TACGGATTCATCGCTC	0.0108631	0.0127846	0.00852559	0.00845774	0.00464657	0.0597077	0.024132	0.544884	0.0701592	0.18002	0.035008	0.00858253	0.00638986
FCA_GND8125922_TACGGGCGTGTTAAGA	0.00606877	0.00596192	0.00367171	0.004336	0.000883389	0.114957	0.00933683	0.00966004	0.786711	0.0142082	0.00187064	0.00149191	0.00189766
FCA_GND8125922_TACTTACAGACTAGGC	0.0345167	0.0339004	0.0225427	0.037202	0.0111177	0.0372986	0.0226298	0.0453766	0.0605937	0.0306171	0.0218732	0.00933467	0.549649
FCA_GND8125922_TAGACCATCACGATGT	0.0046609	0.0078034	0.0050669	0.00634247	0.000649934	0.159484	0.0106566	0.014653	0.419681	0.00625298	0.00235234	0.00160344	0.0243297
FCA_GND8125922_TAGACCATCTGACCTC	0.0135852	0.0111517	0.00721582	0.00497542	0.000853928	0.00532592	0.00164226	0.00214701	0.00565715	0.00192904	0.000925676	0.00175217	0.929141
FCA_GND8125922_TAGCCGGAGTTAGCGG	0.00159324	0.000990392	0.00127595	0.00177801	0.000688324	0.00302501	0.00160649	0.0228696	0.694791	0.0508415	0.0255083	0.000899038	0.00179892
FCA_GND8125922_TAGTTGGAGTCCAGGA	0.00183929	0.00460954	0.00176197	0.00131504	0.000565288	0.00430784	0.00372849	0.00905859	0.951393	0.00932272	0.00133932	0.00226836	0.000916036
FCA_GND8125922_TATGCCCAGACCACGA	0.0212986	0.0169078	0.01683	0.0173637	0.00486207	0.098571	0.029589	0.0351664	0.167555	0.0267347	0.318283	0.0056454	0.0106229
FCA_GND8125922_TCAACGAAGTCTCCTC	0.00902635	0.0113661	0.00721629	0.00825105	0.00197832	0.0303279	0.00967647	0.136596	0.594273	0.155607	0.00978684	0.00293687	0.00428856
FCA_GND8125922_TCAACGATCATGCTCC	0.0697686	0.0284244	0.0183215	0.016121	0.00789528	0.0450291	0.0287216	0.0448811	0.622086	0.0214084	0.00635465	0.00629517	0.0124546
FCA_GND8125922_TCAATCTCATACTACG	0.0706667	0.0112525	0.00567626	0.0101933	0.00213176	0.0152865	0.0078083	0.0208202	0.780968	0.0115042	0.00290339	0.00224284	0.00404074
FCA_GND8125922_TCAATCTCATCGACGC	0.0110494	0.0197295	0.00784594	0.009494	0.00147939	0.0596779	0.0116653	0.0217531	0.653895	0.0440561	0.0133913	0.0045449	0.00487015
FCA_GND8125922_TCAATCTGTATATCCG	0.00642584	0.00460136	0.00169382	0.00449879	0.000600473	0.0025307	0.00157392	0.00384708	0.00353962	0.0032465	0.00167668	0.00131778	0.952338
FCA_GND8125922_TCAATCTTCATAAAGG	0.0122332	0.00829689	0.00403561	0.0057223	0.0033374	0.0197699	0.178403	0.0158827	0.710551	0.00789685	0.00264331	0.00309868	0.0029036
FCA_GND8125922_TCACAAGAGCTTCGCG	0.000967237	0.0023552	0.00103595	0.000535827	0.00117279	0.000849334	0.000789407	0.000669348	0.00214015	0.00102867	0.00108	0.984912	0.00106932
FCA_GND8125922_TCACAAGAGGGAGTAA	0.00699543	0.00760465	0.00225446	0.00489728	0.00079976	0.00754941	0.00239144	0.00523886	0.00701813	0.00636865	0.00158049	0.00139475	0.929111
FCA_GND8125922_TCACAAGCATTGGTAC	0.00553025	0.00540217	0.00495992	0.00555785	0.00196741	0.0335824	0.0110937	0.078669	0.764877	0.0372369	0.00543263	0.00388729	0.00257389
FCA_GND8125922_TCACAAGCATTTGCTT	0.00240208	0.00229257	0.00218165	0.00717713	0.000897536	0.00896724	0.00180799	0.00383806	0.0070191	0.00230372	0.00201062	0.00123941	0.83131
FCA_GND8125922_TCACAAGGTTGACGTT	0.01165	0.0144126	0.0417254	0.00560207	0.00465341	0.28184	0.0309173	0.0114831	0.487343	0.0142877	0.03525	0.00486398	0.00729052
FCA_GND8125922_TCACGAATCACTCTTA	0.0125463	0.00825159	0.00831935	0.00600445	0.00388833	0.026514	0.0124194	0.784237	0.0271094	0.0537692	0.0147047	0.00346422	0.0126155
FCA_GND8125922_TCAGCAACACTTAACG	0.000502568	0.000526515	0.000772074	0.00120742	0.000866057	0.00478899	0.979306	0.000447733	0.000902564	0.0005033	0.00414863	0.00136971	0.00165715
FCA_GND8125922_TCAGGATTCCTAGTGA	0.0382049	0.0200437	0.420321	0.0327776	0.00306107	0.109281	0.0371895	0.0043643	0.026812	0.00527832	0.00353379	0.00475022	0.26606
FCA_GND8125922_TCAGGTATCTTCAACT	0.010542	0.00760418	0.0038221	0.00813027	0.00165999	0.0144309	0.00643046	0.0141696	0.0161088	0.0174213	0.00482552	0.00226511	0.848896
FCA_GND8125922_TCATTACAGTGTACCT	0.00340882	0.00333247	0.00568553	0.00289908	0.000592949	0.00454402	0.00135948	0.00269273	0.00400205	0.00299304	0.00109241	0.000971477	0.957306
FCA_GND8125922_TCCACACGTTGAACTC	0.00452026	0.00270955	0.00171133	0.00351066	0.000933892	0.00532877	0.00215173	0.00428339	0.0185231	0.00807777	0.00319126	0.00200364	0.931043
FCA_GND8125922_TCCCGATAGATCACGG	0.0150458	0.00858661	0.00519096	0.0110874	0.00165081	0.016186	0.00603132	0.00706599	0.0190047	0.0102255	0.00388514	0.00182577	0.852891
FCA_GND8125922_TCCCGATAGGACAGCT	0.0174664	0.0139423	0.0103244	0.0111238	0.00406077	0.134285	0.045527	0.0317019	0.554441	0.022199	0.101742	0.00473052	0.0104902
FCA_GND8125922_TCCCGATCAATCGGTT	0.00119325	0.00148525	0.00140173	0.00215482	0.000526002	0.164425	0.771622	0.00305914	0.0086202	0.00119927	0.00601433	0.00145971	0.00213629
FCA_GND8125922_TCGAGGCAGCAGATCG	0.00125462	0.00156154	0.00283041	0.00238054	0.00175037	0.626852	0.0234445	0.00119738	0.0102673	0.00077659	0.00227604	0.00170117	0.0042214
FCA_GND8125922_TCGAGGCGTAAACGCG	0.00597473	0.0061472	0.00352848	0.00564676	0.00130473	0.0146205	0.00355517	0.0743749	0.68342	0.110557	0.0629579	0.00214743	0.00275696
FCA_GND8125922_TCGCGAGGTACCGTAT	0.0084251	0.0061929	0.00442792	0.0120159	0.00247625	0.492138	0.0698539	0.00320119	0.0197322	0.00173184	0.00317381	0.00216286	0.0143432
FCA_GND8125922_TCGGTAACAGGTCGTC	0.0221124	0.0160647	0.016546	0.01122	0.00464142	0.0223359	0.0132028	0.195458	0.270717	0.339739	0.0101935	0.00671522	0.00553607
FCA_GND8125922_TCGGTAACAGGTTTCA	0.0213814	0.0145535	0.0110312	0.00845713	0.0023649	0.0884558	0.109977	0.0674542	0.564844	0.0305156	0.0206875	0.00311448	0.00621186
FCA_GND8125922_TCGTACCGTTGAGGTG	0.0145087	0.00431794	0.00230334	0.0390403	0.00342294	0.0116388	0.874794	0.00365056	0.00722622	0.002016	0.00152218	0.00422103	0.00167647
FCA_GND8125922_TCTCATACAGCCACCA	0.0048828	0.00344689	0.00444702	0.00270577	0.000758972	0.00589355	0.00351113	0.165192	0.712039	0.0859655	0.00247937	0.0013878	0.00110057
FCA_GND8125922_TCTCTAACATATGAGA	0.143012	0.015746	0.0122705	0.0166538	0.00523393	0.197872	0.0389531	0.039689	0.375807	0.02463	0.0151167	0.00649735	0.0107508
FCA_GND8125922_TCTGGAAAGACTTTCG	0.0119505	0.0196313	0.00743237	0.00358415	0.00335268	0.132955	0.021235	0.0170402	0.717324	0.0139376	0.00269771	0.00378702	0.0060584
FCA_GND8125922_TCTTCGGCACTTAACG	0.00336433	0.00413451	0.00592258	0.00251213	0.00202721	0.00629364	0.958939	0.000947248	0.00433819	0.00077311	0.00105145	0.00243779	0.0035649
FCA_GND8125922_TCTTCGGGTCATTAGC	0.00793381	0.00689223	0.00425532	0.0077675	0.00182416	0.765726	0.0568651	0.00259427	0.0388986	0.0023936	0.00238137	0.00211512	0.00805864
FCA_GND8125922_TCTTTCCAGCTACCGC	0.00296235	0.00102464	0.172059	0.00448507	0.000790209	0.00289109	0.0021029	0.00132131	0.00188868	0.00117072	0.00353473	0.00110099	0.799731
FCA_GND8125922_TGAAAGAAGGCAGTCA	0.0187273	0.0103708	0.020829	0.00854391	0.00520492	0.0180876	0.0111445	0.0502063	0.34255	0.421088	0.0109394	0.00455075	0.0148433
FCA_GND8125922_TGACGGCAGAGCTGCA	0.0145334	0.00821955	0.00636051	0.0391805	0.0015623	0.00519643	0.896084	0.00228412	0.00277946	0.00125073	0.00224654	0.00195079	0.0053893
FCA_GND8125922_TGACTAGGTAGAAAGG	0.00497729	0.00388663	0.00263984	0.00782552	0.00140759	0.038904	0.726726	0.0340531	0.0100732	0.00558278	0.00297324	0.00222735	0.00930323
FCA_GND8125922_TGACTTTTCAAGCCTA	0.0173332	0.0151983	0.0067153	0.015416	0.00225739	0.0691533	0.0292351	0.0297895	0.339774	0.0144427	0.00524751	0.00255838	0.010254
FCA_GND8125922_TGACTTTTCTCGTTTA	0.00222912	0.00329881	0.00189861	0.00358833	0.000696151	0.0322534	0.00945102	0.00876029	0.112639	0.00592752	0.00626062	0.00112505	0.0052797
FCA_GND8125922_TGAGAGGAGCACCGCT	0.0114473	0.00990988	0.00349645	0.00396892	0.0019098	0.033048	0.038299	0.0113655	0.832267	0.00917927	0.00220069	0.00417914	0.00425288
FCA_GND8125922_TGAGAGGTCCTTTCGG	0.00242042	0.00283141	0.00222822	0.00379725	0.000463128	0.00920812	0.00348294	0.00679999	0.790893	0.0349435	0.00812294	0.00170212	0.00170554
FCA_GND8125922_TGAGCATAGCGTTGCC	0.00305794	0.0034372	0.00285623	0.00324892	0.00117281	0.0155438	0.021964	0.0311516	0.834028	0.0162313	0.00647865	0.00179661	0.00205204
FCA_GND8125922_TGAGCCGAGAGGGCTT	0.00757487	0.00670052	0.00351788	0.00472104	0.000842194	0.0219828	0.00799634	0.0441962	0.834775	0.0458052	0.00250745	0.00283138	0.00257304
FCA_GND8125922_TGAGCCGCAATCTACG	0.00922496	0.00571464	0.00509599	0.00334349	0.00126744	0.0157482	0.00395974	0.060184	0.780925	0.0423705	0.0547645	0.00170092	0.00210759
FCA_GND8125922_TGAGCCGCAGACGCTC	0.00759743	0.00657915	0.00870669	0.00442539	0.0115694	0.00796391	0.00765819	0.01438	0.865034	0.0304414	0.0025321	0.00162089	0.00369774
FCA_GND8125922_TGCCCATCATGAGCGA	0.00754209	0.00402583	0.0066532	0.00323396	0.000560321	0.00803699	0.00286148	0.0135947	0.917689	0.0176874	0.001164	0.00102148	0.0021754
FCA_GND8125922_TGCCCTAGTTTGACAC	0.000824208	0.00139449	0.00120151	0.000705449	0.000323991	0.00124764	0.000581375	0.0101571	0.857108	0.117451	0.00487534	0.000694022	0.000375797
FCA_GND8125922_TGCGCAGAGTCACGCC	0.0186052	0.0142015	0.0101343	0.0118002	0.00289266	0.284219	0.0109024	0.00950283	0.285016	0.0166375	0.0272963	0.00511268	0.0281652
FCA_GND8125922_TGCGTGGCAGGCTCAC	0.000196756	0.000261176	0.000472271	0.000301538	0.000240539	0.000165654	0.000185859	0.000225607	0.000312271	0.000631477	0.000714478	0.00144154	0.000371022
FCA_GND8125922_TGCTACCTCCCAAGTA	0.0215202	0.00984838	0.616377	0.0369313	0.00421917	0.0874275	0.0327886	0.00580643	0.0399294	0.00678726	0.00419495	0.00469704	0.0948934
FCA_GND8125922_TGGACGCGTGCTAGCC	0.0505297	0.0237227	0.0138877	0.0100852	0.00423204	0.0277566	0.0173368	0.127548	0.661546	0.0196004	0.00329502	0.00369212	0.00402242
FCA_GND8125922_TGGCTGGAGGACAGAA	0.00591479	0.00496649	0.004824	0.0025217	0.00317922	0.0103307	0.010784	0.0632148	0.806981	0.0341738	0.00670943	0.00392136	0.00315208
FCA_GND8125922_TGGCTGGCACGAGGTA	0.00794551	0.00438219	0.00273988	0.00220503	0.000565756	0.00603156	0.00583773	0.0127652	0.93649	0.0101672	0.000721044	0.00100044	0.000823693
FCA_GND8125922_TGGGCGTAGTTGAGAT	0.00935147	0.00521521	0.00459749	0.00539831	0.00182428	0.51878	0.0840326	0.00346202	0.083392	0.00319853	0.00384278	0.0026616	0.00482641
FCA_GND8125922_TGGGCGTGTACCCAAT	0.655007	0.0481501	0.053748	0.0949248	0.0019085	0.0250287	0.0653586	0.00457745	0.0141276	0.003524	0.00242565	0.00258807	0.00915706
FCA_GND8125922_TGTCCCACATGACATC	0.00212798	0.00228583	0.00111677	0.00526036	0.000576283	0.0143062	0.953648	0.00138729	0.00273432	0.00172964	0.00259971	0.00129418	0.000807164
FCA_GND8125922_TTAACTCAGCCTTGAT	0.00175676	0.00119701	0.000744468	0.00110842	0.000644886	0.0111737	0.000710378	0.000812356	0.00101194	0.00102796	0.00105472	0.00108371	0.972521
FCA_GND8125922_TTAGGCAAGCAGCCTC	0.0021028	0.00262213	0.00174568	0.00204346	0.00106636	0.00208478	0.00197385	0.116848	0.757733	0.102461	0.00196697	0.00128121	0.00153454
FCA_GND8125922_TTAGGCAGTGAAAGAG	0.00106216	0.00108638	0.00218341	0.000920203	0.00245551	0.00356144	0.00576139	0.00422965	0.95884	0.00877224	0.00319607	0.00138771	0.00168144
FCA_GND8125922_TTAGGCATCTCTTATG	0.00327141	0.00355116	0.00204073	0.00290613	0.000892879	0.0133977	0.00709598	0.0561501	0.882784	0.013001	0.00141352	0.00182109	0.00196385
FCA_GND8125922_TTCCCAGAGTCATGCT	0.00701439	0.0110301	0.00417436	0.0144869	0.0014452	0.227642	0.046298	0.00257671	0.0465688	0.00134667	0.00365096	0.00282318	0.0129555
FCA_GND8125922_TTCCCAGCAGTGAGTG	0.00612558	0.00506526	0.00331044	0.00600392	0.000958657	0.00476068	0.00408082	0.0278601	0.00425802	0.00476355	0.00327275	0.00142907	0.91708
FCA_GND8125922_TTCGAAGCACAGCCCA	0.00463847	0.00293383	0.00255146	0.00300892	0.000907402	0.0349618	0.0115791	0.0119069	0.878309	0.00645338	0.0258246	0.00185101	0.00174728
FCA_GND8125922_TTCGAAGTCTACCAGA	0.0079873	0.00662712	0.00609354	0.00431771	0.00178376	0.0284563	0.00726074	0.0668377	0.763291	0.0709002	0.00866511	0.00241664	0.00606572
FCA_GND8125922_TTCTACAAGCTAGGCA	0.00245477	0.0034209	0.00110114	0.00309699	0.000575822	0.0058188	0.00150847	0.0038242	0.00243026	0.00370395	0.00197129	0.00111742	0.963691
FCA_GND8125922_TTCTCAATCACCTTAT	0.00306942	0.00103373	0.528707	0.00640392	0.00139933	0.0077768	0.0109529	0.00106618	0.00275926	0.00125404	0.00159444	0.00128039	0.423932
FCA_GND8125922_TTCTCAATCTGCGACG	0.00277472	0.00209897	0.00236791	0.00283889	0.000740788	0.0124025	0.00284159	0.0653191	0.853163	0.0313475	0.00684162	0.00152489	0.00199469
FCA_GND8125922_TTCTTAGAGAGCCCAA	0.00508118	0.00458441	0.00381892	0.00263404	0.00138711	0.00496665	0.0039142	0.287748	0.485044	0.186548	0.00495859	0.00377519	0.00105638
FCA_GND8125922_TTCTTAGCATCGGTTA	0.0132457	0.0127156	0.010236	0.0110413	0.00443908	0.032112	0.0111368	0.0584015	0.34757	0.0848118	0.34057	0.00633482	0.00835489
FCA_GND8125922_TTCTTAGGTCGAGTTT	0.00780869	0.0112179	0.00828483	0.00812933	0.00120155	0.0992514	0.00619644	0.0414933	0.714793	0.0655167	0.00580868	0.00193123	0.0040485
FCA_GND8125922_TTGCCGTTCGCTAGCG	0.0179891	0.0229049	0.0101633	0.0112699	0.00257457	0.0366029	0.00897236	0.0709086	0.560066	0.215021	0.0128722	0.00361181	0.00375003
FCA_GND8125922_TTGCGTCAGACACGAC	0.0109782	0.00652278	0.00753306	0.00676998	0.00228918	0.00894982	0.00625271	0.204451	0.616858	0.0978545	0.00608866	0.0025832	0.00316879
FCA_GND8125922_TTGGAACAGCGTAGTG	0.00388209	0.00438869	0.00306122	0.00379816	0.00100328	0.021871	0.0117114	0.0093812	0.885032	0.0166217	0.00621974	0.00166787	0.00158652
FCA_GND8125922_TTGGAACGTCCAGTAT	0.0195758	0.0113116	0.00579044	0.00771594	0.00224065	0.0121962	0.00716304	0.0605145	0.729483	0.112624	0.00355439	0.00208912	0.0037875
FCA_GND8125922_TTGTAGGAGGAATGGA	0.0849168	0.0218999	0.038085	0.141818	0.0511915	0.0562458	0.528012	0.00522934	0.0130172	0.00398566	0.00496117	0.00579614	0.0111645
FCA_GND8125922_TTTCCTCGTGTGCGTC	0.00991789	0.916635	0.00243914	0.00273337	0.000692338	0.00166754	0.00171677	0.000822718	0.00230665	0.00113682	0.000927201	0.0228072	0.00130787
FCA_GND8125922_TTTGTCACATATGGTC	0.0016693	0.00121575	0.00191142	0.00121556	0.000776377	0.00631153	0.00255023	0.00440537	0.00966095	0.00208553	0.962238	0.00178469	0.00108862
FCA_GND8125924_AAACCTGAGTGTTAGA	0.0609621	0.0331117	0.0192369	0.0175263	0.0037822	0.0194545	0.0136816	0.123511	0.315427	0.058675	0.0237843	0.0050211	0.0058913
FCA_GND8125924_AAAGATGTCATGGTCA	0.00319536	0.00470424	0.00349129	0.00488911	0.00164104	0.0113723	0.00491336	0.0288887	0.611614	0.0228657	0.0258796	0.00142906	0.00463295
FCA_GND8125924_AACGTTGTCTTGCCGT	0.00729491	0.00821441	0.00567867	0.0101706	0.00251515	0.0218208	0.0087889	0.0127119	0.714531	0.13679	0.00279232	0.00304305	0.00551468
FCA_GND8125924_AACTCAGAGGAGTCTG	0.0193996	0.0113452	0.00993161	0.0110978	0.00374368	0.0167564	0.00747793	0.0566198	0.422032	0.360593	0.0101564	0.00390917	0.00801569
FCA_GND8125924_AACTCAGTCGTTACAG	0.00444682	0.00306321	0.00426572	0.00389513	0.00265661	0.00874663	0.00649501	0.00362952	0.00647173	0.0289526	0.899569	0.00199658	0.00261939
FCA_GND8125924_AACTGGTAGATGTAAC	0.231391	0.0612776	0.035116	0.0229111	0.227562	0.102834	0.128452	0.0256649	0.0484352	0.017347	0.00976253	0.0154278	0.0212861
FCA_GND8125924_AACTGGTTCGTACGGC	0.023587	0.0303804	0.0135223	0.0178849	0.426407	0.065236	0.108194	0.0163863	0.180117	0.010812	0.00636747	0.00820636	0.0129155
FCA_GND8125924_AACTTTCCATGGGAAC	0.0534912	0.0465075	0.0235335	0.0427969	0.185739	0.298039	0.176888	0.0186986	0.0504239	0.0150771	0.00620545	0.00628106	0.0155266
FCA_GND8125924_AAGTCTGCAATCCAAC	0.115037	0.0815871	0.029761	0.0436547	0.347886	0.0658501	0.153608	0.0267076	0.0460462	0.0158646	0.00729114	0.00876507	0.0138284
FCA_GND8125924_AATCCAGAGCGGATCA	0.0222484	0.015226	0.0155709	0.0139006	0.004928	0.0165924	0.0103308	0.0576037	0.0689908	0.693279	0.019048	0.00517231	0.0136808
FCA_GND8125924_AATCGGTAGACAGACC	0.0740729	0.0571625	0.0213434	0.0290142	0.0986586	0.404317	0.151442	0.0177472	0.0463409	0.0141699	0.00630329	0.0051976	0.014038
FCA_GND8125924_AATCGGTCAAGCCATT	0.0208371	0.0152129	0.00757781	0.0144661	0.00263389	0.0530378	0.0194773	0.0282793	0.65318	0.03859	0.00885699	0.00233034	0.00293548
FCA_GND8125924_ACACCCTCAATGGTCT	0.0269519	0.0415576	0.0238469	0.0413414	0.161804	0.20911	0.0655931	0.0360661	0.10884	0.0212514	0.0105428	0.00662629	0.0250674
FCA_GND8125924_ACACCCTCAGATGGGT	0.00655084	0.00255162	0.00863431	0.00334428	0.00327047	0.0084463	0.00543221	0.0848966	0.0968416	0.079496	0.667968	0.00279755	0.00340968
FCA_GND8125924_ACACCCTGTTGAGTTC	0.12075	0.00837616	0.00624194	0.043999	0.00238879	0.0226205	0.733253	0.00651669	0.0138511	0.00228074	0.00386288	0.00268635	0.00400424
FCA_GND8125924_ACATACGCAGCCAGAA	0.00535205	0.00671882	0.00413427	0.00548773	0.00187614	0.0109286	0.00447095	0.161736	0.43789	0.0510888	0.28362	0.00412649	0.00529839
FCA_GND8125924_ACATCAGAGGGATACC	0.118387	0.069291	0.0413204	0.0290431	0.135482	0.364325	0.0715922	0.0155451	0.0552397	0.0156503	0.00654195	0.00669965	0.0147416
FCA_GND8125924_ACATGGTCAGACGCCT	0.0392168	0.0208167	0.0258482	0.0193375	0.368301	0.11025	0.0492681	0.0300879	0.169093	0.02789	0.0145079	0.00954063	0.0199467
FCA_GND8125924_ACATGGTTCGGCTACG	0.0573416	0.0647093	0.0409666	0.0123108	0.317294	0.240065	0.071287	0.0165196	0.0697638	0.01215	0.00821534	0.0101035	0.0344059
FCA_GND8125924_ACCGTAAAGCGACGTA	0.00549543	0.00563141	0.00410144	0.0077306	0.00293522	0.0127572	0.00547401	0.0277375	0.438912	0.0129148	0.00420619	0.002177	0.00723574
FCA_GND8125924_ACCTTTAAGCCTCGTG	0.0569375	0.0449167	0.0257816	0.0297683	0.244442	0.230409	0.142261	0.0270008	0.0782269	0.0148255	0.00948327	0.0070744	0.0264666
FCA_GND8125924_ACCTTTAAGCGTGAAC	0.132583	0.0313947	0.0138721	0.0221904	0.00230877	0.0491113	0.0433945	0.0381138	0.540003	0.0542594	0.00936387	0.00335476	0.00452602
FCA_GND8125924_ACGAGCCGTTACCGAT	0.00682009	0.00399841	0.00439862	0.00965727	0.00187711	0.00792571	0.00401886	0.0692458	0.639994	0.202834	0.00861483	0.00193147	0.00338392
FCA_GND8125924_ACGATACAGCCTCGTG	0.00590317	0.00347233	0.0026272	0.00332764	0.00168677	0.00788604	0.00366466	0.0315638	0.896581	0.00394572	0.00159055	0.00147109	0.00240286
FCA_GND8125924_ACGATGTAGTGCGATG	0.067886	0.0138746	0.00578282	0.0636232	0.00670597	0.0186866	0.770757	0.00375022	0.00833929	0.00178365	0.00220155	0.00409576	0.00284362
FCA_GND8125924_ACGATGTTCTCGCATC	0.0347474	0.029952	0.0252947	0.0162231	0.399292	0.209939	0.0925558	0.0207005	0.0711049	0.0142046	0.00879855	0.00763243	0.0257762
FCA_GND8125924_ACGATGTTCTTCGGTC	0.00712969	0.00729127	0.00454886	0.0152529	0.00184969	0.179159	0.0339541	0.0104864	0.131536	0.0058334	0.00991353	0.00206592	0.00982602
FCA_GND8125924_ACGCAGCTCGAGAGCA	0.0469325	0.0620082	0.0100276	0.0375277	0.00310963	0.0853965	0.0142461	0.0118624	0.244935	0.0633213	0.0107377	0.00401904	0.00656192
FCA_GND8125924_ACGCCGAAGCCCGAAA	0.00354907	0.00212606	0.00257264	0.00337083	0.00151713	0.00538532	0.00231231	0.038302	0.859385	0.0311338	0.00163626	0.00116943	0.00190308
FCA_GND8125924_ACGCCGATCATAAAGG	0.0741144	0.034224	0.0272217	0.0211179	0.431694	0.0720427	0.128241	0.0243986	0.0631412	0.0183299	0.0147681	0.0101544	0.0134215
FCA_GND8125924_ACGGAGAAGACTCGGA	0.0244456	0.0199108	0.0105716	0.0123308	0.00293943	0.11109	0.0586325	0.0398166	0.654502	0.0114778	0.00286568	0.00459561	0.00738078
FCA_GND8125924_ACGGAGAGTGGTAACG	0.00386315	0.00725445	0.00546164	0.00914055	0.0028012	0.0106672	0.00457862	0.032972	0.240704	0.15855	0.0117697	0.00254605	0.00648523
FCA_GND8125924_ACGGGCTAGCGTCAAG	0.202427	0.0388161	0.0269094	0.194962	0.0225504	0.059518	0.179045	0.0142679	0.0534282	0.0136029	0.0214379	0.0124387	0.0503656
FCA_GND8125924_ACGGGCTGTTTGTGTG	0.0207166	0.0166583	0.0160345	0.0204297	0.0065394	0.0352659	0.0129519	0.250063	0.244661	0.151252	0.0183522	0.00631696	0.0168359
FCA_GND8125924_ACGGGCTTCGCACTCT	0.0232658	0.0300318	0.0225021	0.0262142	0.136279	0.307552	0.0626794	0.0355608	0.131488	0.0234351	0.0114073	0.00509155	0.0221922
FCA_GND8125924_ACGGGTCTCTGTGCAA	0.0534275	0.0327075	0.026619	0.0176163	0.357623	0.258785	0.0773179	0.0144243	0.0502094	0.0108502	0.00694458	0.00681676	0.0178208
FCA_GND8125924_ACTATCTCATACAGCT	0.00612471	0.00463146	0.00243382	0.0074874	0.000598758	0.02576	0.00332091	0.0169351	0.728341	0.0211741	0.00245784	0.00135122	0.00178775
FCA_GND8125924_ACTGATGAGGCTCTTA	0.0265326	0.00715835	0.0126076	0.0141563	0.00429169	0.0358677	0.0248773	0.388071	0.340145	0.0301757	0.0131147	0.00868435	0.00706092
FCA_GND8125924_ACTGATGGTCAAAGAT	0.0387577	0.0551016	0.0373853	0.021226	0.464852	0.105729	0.123079	0.0207832	0.0307742	0.0105712	0.0110124	0.00715729	0.0181445
FCA_GND8125924_ACTGATGGTCAACATC	0.0515371	0.0423516	0.0183305	0.0652123	0.336529	0.152045	0.118327	0.0190033	0.0497117	0.0139169	0.00819867	0.00732989	0.0493112
FCA_GND8125924_ACTGATGGTTCGTGAT	0.116923	0.0427922	0.0280042	0.0980944	0.0111748	0.214978	0.0621212	0.0353281	0.0591841	0.0163594	0.0121657	0.00840878	0.0243129
FCA_GND8125924_ACTGCTCGTGCCTGTG	0.00355038	0.0024507	0.00475197	0.00528393	0.00334504	0.0288144	0.0130897	0.0188165	0.483443	0.00882824	0.00210734	0.00234843	0.00469609
FCA_GND8125924_ACTGTCCGTTCCGGCA	0.0414982	0.0383792	0.0212079	0.0220994	0.410046	0.118322	0.121533	0.0317682	0.0710441	0.012731	0.0122603	0.00827093	0.0247293
FCA_GND8125924_ACTTACTAGCCAGGAT	0.109892	0.0600811	0.0308592	0.0316518	0.102653	0.183933	0.272822	0.0209905	0.0593262	0.0227675	0.0137389	0.00710688	0.0199498
FCA_GND8125924_AGACGTTCATCGGGTC	0.100347	0.0250436	0.0138481	0.0567973	0.00407696	0.0680381	0.107627	0.0505087	0.413299	0.0248984	0.011594	0.00505112	0.00677303
FCA_GND8125924_AGAGTGGAGATCCCAT	0.0467002	0.0316478	0.0192105	0.064552	0.00714698	0.149234	0.0434555	0.0227676	0.141988	0.0251137	0.0114115	0.00550463	0.0120066
FCA_GND8125924_AGATCTGGTACATCCA	0.0261486	0.0131623	0.00588751	0.0221855	0.00207312	0.0343187	0.0131671	0.0161798	0.339105	0.0155502	0.00443655	0.00267909	0.00719594
FCA_GND8125924_AGATTGCAGTCATCCA	0.131625	0.0428751	0.0398171	0.0276493	0.172904	0.13127	0.302485	0.013135	0.0328101	0.0118703	0.00675536	0.00737728	0.0322138
FCA_GND8125924_AGCATACCACCACCAG	0.0277612	0.00870868	0.00563499	0.0091938	0.00252539	0.0113762	0.00461648	0.0833657	0.763717	0.0308661	0.0164373	0.00153155	0.00423672
FCA_GND8125924_AGCTCCTAGCTCTCGG	0.0865187	0.0635543	0.0305284	0.0237008	0.453524	0.084597	0.0801982	0.0265442	0.0568372	0.012168	0.00718178	0.00873753	0.0153496
FCA_GND8125924_AGGCCACGTTCCGGCA	0.0478609	0.0300932	0.0491895	0.0191608	0.37794	0.16695	0.0436842	0.0194488	0.0791309	0.0148216	0.008359	0.00752025	0.0185373
FCA_GND8125924_AGGCCACTCACTTCAT	0.026564	0.0139283	0.0117739	0.0256376	0.00791308	0.0334637	0.0159161	0.103355	0.398015	0.0311156	0.2103	0.00490158	0.00843208
FCA_GND8125924_AGGGAGTAGGGATCTG	0.00982506	0.00188486	0.00511725	0.00439702	0.00273043	0.00608994	0.00564944	0.119066	0.757871	0.0205606	0.0220639	0.00127553	0.00366067
FCA_GND8125924_AGGGAGTGTAGAAGGA	0.0104288	0.0119455	0.00784063	0.00839152	0.00256885	0.0189909	0.00682516	0.0526344	0.0667238	0.0122479	0.749393	0.00929864	0.00850835
FCA_GND8125924_AGGTCCGCACATGTGT	0.14158	0.0628487	0.0304649	0.0302009	0.216829	0.180283	0.13989	0.0219475	0.0687995	0.0184731	0.00758787	0.00904517	0.0166258
FCA_GND8125924_AGGTCCGCAGTAACGG	0.0142802	0.00835077	0.00740554	0.00953731	0.00479941	0.00641189	0.00956094	0.0623368	0.0428674	0.457667	0.057438	0.00397719	0.0117146
FCA_GND8125924_AGTAGTCCAGATGGCA	0.00607093	0.00664541	0.00712622	0.0078493	0.00299906	0.0103385	0.0075278	0.0132654	0.217656	0.519131	0.012272	0.00294662	0.0044288
FCA_GND8125924_ATAAGAGAGTGTTGAA	0.0418493	0.0211637	0.0315585	0.0197558	0.0091204	0.0421367	0.0216308	0.228002	0.376444	0.0441722	0.0174044	0.0128703	0.0201077
FCA_GND8125924_ATAAGAGTCAAGATCC	0.0183195	0.0171507	0.00736467	0.015997	0.00296426	0.0190195	0.00771208	0.0390181	0.390929	0.389203	0.00491924	0.00322368	0.00566787
FCA_GND8125924_ATAGACCTCTTGGGTA	0.0287068	0.00584998	0.00853456	0.00842545	0.00303551	0.0650694	0.00813244	0.0201919	0.786926	0.0133368	0.00366536	0.00223119	0.0037796
FCA_GND8125924_ATCATCTCAGCTTCGG	0.0612308	0.0450178	0.0295742	0.0220766	0.183858	0.174095	0.291565	0.0206109	0.0543838	0.0174284	0.0105737	0.0095825	0.027886
FCA_GND8125924_ATCATCTGTGCTGTAT	0.0243653	0.0295542	0.0203864	0.0127537	0.591248	0.103721	0.0588705	0.0162237	0.0450094	0.00812099	0.00528839	0.00692297	0.0230841
FCA_GND8125924_ATCATGGAGGCTCTTA	0.0147535	0.00915193	0.00380526	0.0254099	0.00159324	0.104398	0.00783728	0.0120567	0.107261	0.00981758	0.00722906	0.00343225	0.0142922
FCA_GND8125924_ATCCACCGTGAACCTT	0.0264884	0.0171425	0.0119132	0.0269362	0.00423048	0.0995682	0.03171	0.036112	0.629472	0.0234531	0.00484135	0.00248837	0.0042632
FCA_GND8125924_ATCCGAAGTCCTAGCG	0.282444	0.0549475	0.0327341	0.0355462	0.00968994	0.300423	0.0364437	0.0161184	0.125298	0.010625	0.00466173	0.00317277	0.0153504
FCA_GND8125924_ATCGAGTTCAAGATCC	0.0148953	0.00859885	0.00641739	0.0181571	0.00497308	0.0279674	0.0387374	0.0674421	0.651723	0.0142139	0.00732885	0.00552603	0.00728161
FCA_GND8125924_ATCTACTAGCTAGGCA	0.131321	0.0403628	0.0126917	0.0208449	0.00289605	0.0397687	0.0161749	0.0773739	0.43845	0.0841799	0.00615735	0.00390053	0.00545002
FCA_GND8125924_ATGAGGGCATCTCGCT	0.0151251	0.00493997	0.00457636	0.00756736	0.00225193	0.00831514	0.0038905	0.128158	0.77061	0.0264822	0.00125422	0.00210143	0.0036387
FCA_GND8125924_ATGAGGGGTCCATCCT	0.0431219	0.0528152	0.0245007	0.0321949	0.299132	0.273958	0.0706424	0.0178156	0.0631191	0.0123955	0.00682231	0.0066898	0.0147524
FCA_GND8125924_ATGAGGGGTGAGGGAG	0.00583706	0.00456209	0.00450193	0.0119239	0.00323299	0.341855	0.453754	0.00299263	0.00890257	0.00260269	0.00454079	0.00246304	0.00913326
FCA_GND8125924_ATTACTCAGGTTACCT	0.00134345	0.0011241	0.0012863	0.00963222	0.000659645	0.00289043	0.967581	0.00158505	0.00179715	0.00162225	0.00269419	0.00133701	0.000931754
FCA_GND8125924_ATTACTCGTATCGCAT	0.211337	0.00967573	0.418747	0.114241	0.00410134	0.122841	0.0519238	0.00271261	0.00679833	0.00346208	0.0026902	0.00323429	0.0301056
FCA_GND8125924_ATTCTACAGCACACAG	0.0190394	0.00722457	0.00462417	0.0184152	0.00204722	0.0206203	0.0142109	0.0684235	0.708924	0.0140587	0.00540492	0.00219417	0.00306166
FCA_GND8125924_ATTGGTGCAAGTAATG	0.0151673	0.0211488	0.0162843	0.00982156	0.00615552	0.15606	0.0535216	0.00618326	0.526326	0.0462331	0.0164221	0.00752458	0.0142694
FCA_GND8125924_CAACTAGAGAGTACAT	0.0347676	0.0423853	0.0224788	0.0330909	0.238513	0.274654	0.185373	0.0141355	0.0380407	0.0126304	0.00903694	0.00594464	0.0427792
FCA_GND8125924_CAAGAAAGTGGCCCTA	0.0516999	0.00566555	0.00379693	0.103202	0.00114664	0.00802192	0.792075	0.00187681	0.0041392	0.001292	0.00145974	0.00230116	0.00141405
FCA_GND8125924_CACACTCCATGGTCAT	0.0827259	0.148125	0.0223681	0.0438437	0.171254	0.121882	0.0759672	0.0437643	0.0845759	0.0159996	0.00984568	0.00823023	0.0230497
FCA_GND8125924_CACAGGCAGACGCAAC	0.00502998	0.00366008	0.00535009	0.00555051	0.00231677	0.764467	0.0584836	0.00269047	0.00689192	0.00289046	0.00422548	0.00226264	0.0127637
FCA_GND8125924_CACAGTATCTCTGAGA	0.113207	0.0364794	0.0319746	0.0234776	0.258794	0.0792061	0.246576	0.0231226	0.0693915	0.0175113	0.0116907	0.0108489	0.0292192
FCA_GND8125924_CACATAGTCGCAGGCT	0.0103158	0.00672981	0.00798944	0.015663	0.00366956	0.0168499	0.0112063	0.299837	0.474351	0.104942	0.00654883	0.00354151	0.00633183
FCA_GND8125924_CACCACTGTGGTTTCA	0.00620493	0.0120725	0.00331394	0.00679905	0.00124845	0.02939	0.00520433	0.0115428	0.787844	0.0103553	0.00204738	0.00243315	0.00355099
FCA_GND8125924_CAGAATCCATTGTGCA	0.0172555	0.0115148	0.0142831	0.0204718	0.00719089	0.0399244	0.0177106	0.201669	0.217705	0.118913	0.129053	0.00644556	0.012756
FCA_GND8125924_CAGATCAAGCTAGCCC	0.00435772	0.00528587	0.0038938	0.00436341	0.00201313	0.00525119	0.00286898	0.280706	0.250563	0.395803	0.0147391	0.00255665	0.00268043
FCA_GND8125924_CAGATCAGTCGTCTTC	0.000736605	0.000480854	0.00105081	0.000924937	0.000440224	0.00390348	0.00154826	0.0226634	0.891969	0.00976716	0.00414588	0.000836212	0.000489943
FCA_GND8125924_CAGATCAGTTACGGAG	0.0220046	0.0338519	0.00572798	0.0731131	0.00206777	0.152231	0.597496	0.00508508	0.0222232	0.00683321	0.0067986	0.00365615	0.00307695
FCA_GND8125924_CAGCAGCTCGAATGCT	0.0123023	0.0176846	0.00890049	0.0122371	0.00345044	0.012955	0.00811272	0.188718	0.291763	0.387935	0.00695607	0.00340303	0.00382328
FCA_GND8125924_CAGCCGACAGGCTCAC	0.0254293	0.0331135	0.0155794	0.020178	0.406402	0.100575	0.0908659	0.0287449	0.177101	0.0103758	0.00912884	0.00712317	0.00901632
FCA_GND8125924_CAGCCGACATATGAGA	0.0184005	0.0143976	0.0108316	0.0135361	0.00588961	0.0139686	0.0101952	0.207851	0.201783	0.100769	0.0492577	0.00348024	0.0134844
FCA_GND8125924_CAGCGACCATGTTGAC	0.0658685	0.0463921	0.00924255	0.0278836	0.00460732	0.0724718	0.0242701	0.177437	0.471806	0.0337444	0.00658055	0.0037344	0.00802616
FCA_GND8125924_CAGCTGGTCCCGGATG	0.0028972	0.00330721	0.00193065	0.00351156	0.00109961	0.00270361	0.00178875	0.287056	0.661347	0.0161351	0.00260304	0.00286253	0.00149473
FCA_GND8125924_CAGCTGGTCCGCAAGC	0.00765751	0.00828761	0.0095205	0.0188904	0.00559165	0.0127399	0.0117137	0.0143556	0.0823516	0.686828	0.0142062	0.00289723	0.0223468
FCA_GND8125924_CAGGTGCGTACAGTTC	0.0398207	0.0425614	0.0283593	0.0243263	0.448209	0.106563	0.113248	0.023285	0.0515267	0.0137115	0.0111761	0.0074056	0.0265128
FCA_GND8125924_CATATTCGTAACGCGA	0.0478479	0.0464243	0.0137022	0.0222511	0.447559	0.179694	0.0933744	0.0189265	0.048487	0.0123283	0.00591506	0.0063918	0.0093208
FCA_GND8125924_CATATTCTCGGCTTGG	0.00418597	0.00232323	0.00278609	0.00382878	0.00244974	0.00244572	0.00287761	0.053773	0.823815	0.0654422	0.00238163	0.00113992	0.00177375
FCA_GND8125924_CATCAGACAAACTGCT	0.0103399	0.00447065	0.00313848	0.00648421	0.0022376	0.0079452	0.00598885	0.121998	0.525683	0.0328767	0.00335993	0.00209636	0.0076788
FCA_GND8125924_CATCAGATCTATCCTA	0.00539832	0.00568834	0.00914848	0.0105353	0.00685662	0.0252132	0.0107276	0.0319292	0.0858745	0.0293422	0.184397	0.00282944	0.00871169
FCA_GND8125924_CATCCACAGTGTACGG	0.0115076	0.00763275	0.0122641	0.0108343	0.00379718	0.0372084	0.00981081	0.0482892	0.426576	0.0277238	0.0581739	0.00491873	0.0661055
FCA_GND8125924_CATCGAAAGAGCAATT	0.0485767	0.0129317	0.0116139	0.040232	0.00652562	0.0944959	0.183548	0.0108623	0.0532223	0.00910871	0.0155557	0.0044145	0.0201206
FCA_GND8125924_CATGGCGAGACTACAA	0.00309501	0.00227964	0.00228257	0.00321069	0.00167127	0.00322414	0.00449834	0.110356	0.661989	0.172507	0.00214939	0.00147216	0.00154952
FCA_GND8125924_CATTATCAGACAGGCT	0.0469058	0.0690368	0.0231382	0.0308043	0.322586	0.193768	0.111198	0.0226789	0.0389397	0.0154969	0.00832939	0.00603183	0.0259538
FCA_GND8125924_CCAATCCAGAGTGAGA	0.0557227	0.0582763	0.0327878	0.0259755	0.049111	0.431762	0.15498	0.0190801	0.0611534	0.0131044	0.00775526	0.00685022	0.0221688
FCA_GND8125924_CCAATCCCACTAGTAC	0.0170475	0.00767392	0.00698998	0.00744579	0.0022738	0.0164379	0.00541482	0.134676	0.705478	0.023951	0.00530568	0.00393304	0.00417211
FCA_GND8125924_CCAGCGACAAGACACG	0.071826	0.0617507	0.0248905	0.0348847	0.151293	0.403147	0.0743008	0.0196888	0.0561967	0.0132624	0.00841624	0.00744998	0.0245754
FCA_GND8125924_CCATTCGCACATGTGT	0.063151	0.0546833	0.0323043	0.0292406	0.502363	0.104196	0.0717277	0.014253	0.0306265	0.0174742	0.0080648	0.00797688	0.014698
FCA_GND8125924_CCATTCGTCTGGTTCC	0.00430024	0.00275575	0.0034589	0.00387585	0.00128677	0.0378129	0.00469538	0.0413285	0.861818	0.00621731	0.00164547	0.0013788	0.00248661
FCA_GND8125924_CCCATACGTCAGATAA	0.171171	0.0580847	0.0132488	0.197291	0.00471621	0.0655487	0.0311369	0.0235482	0.104387	0.0193524	0.0509248	0.00753163	0.0155146
FCA_GND8125924_CCCTCCTCATTGGCGC	0.0123061	0.0101528	0.0102619	0.0169086	0.00573274	0.0145779	0.00990419	0.0719086	0.181269	0.490898	0.0139446	0.00488075	0.00808345
FCA_GND8125924_CCGGGATAGCTAGTTC	0.0510798	0.0271407	0.0368813	0.0180584	0.507129	0.0788712	0.103086	0.0255901	0.0460147	0.0170195	0.0124491	0.00792563	0.0172481
FCA_GND8125924_CCGGTAGGTGATAAGT	0.014038	0.00741785	0.0101905	0.0203649	0.00477412	0.0208221	0.0122324	0.141891	0.671708	0.026387	0.00662488	0.0028257	0.0150288
FCA_GND8125924_CCGGTAGTCCAACCAA	0.123593	0.0473664	0.0192748	0.0235879	0.0087302	0.0760904	0.0300989	0.230445	0.274322	0.0307111	0.00723132	0.0124575	0.019358
FCA_GND8125924_CCGTACTTCTCACATT	0.0283119	0.012221	0.0180026	0.0402622	0.016742	0.0118661	0.0346419	0.172817	0.459502	0.0258158	0.012357	0.00817419	0.0137724
FCA_GND8125924_CCGTTCATCAACGAAA	0.00562267	0.00297691	0.00306161	0.00418308	0.00167497	0.0122614	0.00407066	0.02101	0.591448	0.0163634	0.0122596	0.00162339	0.00216142
FCA_GND8125924_CCTACACTCTCTTATG	0.000306819	6.63084e-05	0.995192	0.000557626	0.000445907	9.11831e-05	0.000460217	0.000139434	0.000143647	0.000187656	0.000679714	0.000753273	0.000737945
FCA_GND8125924_CCTATTATCTTGACGA	0.184132	0.0686241	0.0165183	0.105203	0.0156707	0.0943638	0.270299	0.0142787	0.0450201	0.00862026	0.00814266	0.00777781	0.0116975
FCA_GND8125924_CCTCAGTAGCGAAGGG	0.0060942	0.00687511	0.0053066	0.00688577	0.00202996	0.0119136	0.00490965	0.0194902	0.027626	0.0232811	0.843615	0.00383726	0.0078776
FCA_GND8125924_CCTCAGTAGCTACCGC	0.0044532	0.00242301	0.00243336	0.00478311	0.000976144	0.00972197	0.00406988	0.00741396	0.333951	0.0311858	0.0108049	0.00222179	0.00307651
FCA_GND8125924_CCTCTGACAATCGAAA	0.00624979	0.00607212	0.00632253	0.00700134	0.00234531	0.0108247	0.00500631	0.0351159	0.482276	0.363366	0.00888239	0.00291242	0.00454177
FCA_GND8125924_CCTTCCCCAATGCCAT	0.427349	0.0221602	0.0120712	0.0487991	0.00498634	0.217093	0.0801861	0.00584973	0.0410827	0.0045443	0.00465121	0.0044183	0.00864683
FCA_GND8125924_CCTTCCCCATTGGTAC	0.0221273	0.0281811	0.0151678	0.0226214	0.00943053	0.0670888	0.112581	0.110079	0.268147	0.103039	0.0206018	0.00698512	0.0140449
FCA_GND8125924_CGACTTCAGTACGTTC	0.0803421	0.0823689	0.0163609	0.0328051	0.19423	0.28324	0.0682023	0.0235879	0.0878787	0.0117702	0.00702108	0.00747369	0.0178006
FCA_GND8125924_CGAGCCAGTGGCAAAC	0.00249299	0.00187323	0.0021404	0.00300765	0.00154261	0.0050496	0.00357126	0.00911226	0.876741	0.0314746	0.00420057	0.00155828	0.00191617
FCA_GND8125924_CGATCGGGTAAGTGTA	0.0276116	0.0136705	0.0116168	0.0216122	0.00742519	0.0115557	0.00900273	0.137998	0.468809	0.215203	0.00456645	0.00276527	0.00615012
FCA_GND8125924_CGCGGTAAGGCCCGTT	0.0472857	0.0378593	0.0200624	0.0203517	0.318885	0.271546	0.108557	0.0238856	0.0379368	0.012238	0.00694002	0.00663404	0.0214959
FCA_GND8125924_CGCGGTACAAGACACG	0.00532663	0.00407256	0.0066388	0.00894115	0.00338291	0.0183002	0.0108436	0.0346212	0.266624	0.395724	0.0329332	0.00233837	0.00698494
FCA_GND8125924_CGCGTTTTCCGTCATC	0.0218718	0.0167329	0.0141231	0.00886265	0.693375	0.076336	0.0436478	0.0137634	0.031727	0.00872254	0.00514451	0.00607172	0.0183103
FCA_GND8125924_CGCTTCAGTACCCAAT	0.0240417	0.0158404	0.0131367	0.020387	0.578499	0.117264	0.104507	0.0122834	0.0414368	0.00786013	0.00662998	0.00705255	0.0215345
FCA_GND8125924_CGGACACTCCGCATAA	0.0203305	0.00785309	0.0119126	0.015302	0.00726595	0.0373824	0.0163669	0.159716	0.547729	0.03434	0.0420509	0.00556674	0.0162585
FCA_GND8125924_CGGACTGCAAGTTCTG	0.0807954	0.0245664	0.00987232	0.0116858	0.00460682	0.0331542	0.0108593	0.0874522	0.675469	0.0109816	0.00297616	0.0026983	0.00831339
FCA_GND8125924_CGGAGCTGTGGGTCAA	0.0189933	0.0112302	0.0109082	0.00741989	0.00221994	0.00546818	0.00348179	0.0319507	0.668827	0.125839	0.00475368	0.0020768	0.00197684
FCA_GND8125924_CGGCTAGGTTAGAACA	0.0177781	0.00716026	0.0157449	0.00768311	0.00527094	0.0206512	0.0140086	0.3681	0.076022	0.355137	0.0562695	0.00699617	0.0109622
FCA_GND8125924_CGGTTAAAGGCTACGA	0.058167	0.0455561	0.0241778	0.0229294	0.222525	0.287496	0.125098	0.0175156	0.0740732	0.0141169	0.00801527	0.00681554	0.0239325
FCA_GND8125924_CGGTTAAGTGTGCCTG	0.0124236	0.0145644	0.00483373	0.0273887	0.00176957	0.0582518	0.0152968	0.0309096	0.251981	0.0098923	0.00617239	0.00197706	0.0112776
FCA_GND8125924_CGTAGGCTCCCTAACC	0.0464949	0.0430935	0.0258467	0.0166821	0.451626	0.154396	0.0563228	0.021762	0.071182	0.0122526	0.00789565	0.00658332	0.0173521
FCA_GND8125924_CGTCAGGTCCGAATGT	0.117879	0.0320388	0.0243482	0.0261064	0.168346	0.262623	0.132412	0.0156354	0.0568358	0.0125541	0.0106895	0.00844158	0.0323058
FCA_GND8125924_CGTGTAAGTTACGCGC	0.0632163	0.0121001	0.00992837	0.0283333	0.00575401	0.153668	0.0168615	0.0202478	0.267187	0.0277531	0.00552057	0.00497249	0.0271302
FCA_GND8125924_CGTGTCTAGAAGATTC	0.00768505	0.00347803	0.00465322	0.00937719	0.00345079	0.00789712	0.004044	0.0366419	0.783881	0.0228807	0.00152186	0.00180344	0.00580757
FCA_GND8125924_CGTGTCTAGGTGATTA	0.0018729	0.00246649	0.00209368	0.00525858	0.00145709	0.0193956	0.00213015	0.0149148	0.874099	0.014035	0.00220333	0.000995972	0.00120748
FCA_GND8125924_CGTGTCTGTCTGGAGA	0.0473251	0.0233675	0.0157442	0.0149399	0.00491209	0.0344008	0.0140143	0.0988201	0.445114	0.182398	0.00920403	0.00570442	0.00678452
FCA_GND8125924_CGTGTCTTCGAATGCT	0.0225368	0.0210339	0.017475	0.00948689	0.50867	0.116418	0.0560016	0.0178795	0.0838901	0.00792248	0.00492142	0.00914023	0.0209268
FCA_GND8125924_CGTTCTGGTCAATGTC	0.00803544	0.00343053	0.00439812	0.00570676	0.00101479	0.0134393	0.00397684	0.0297155	0.859678	0.0331441	0.00390582	0.00156007	0.00177107
FCA_GND8125924_CTAATGGAGTGATCGG	0.010657	0.00710797	0.00908809	0.013657	0.00510872	0.0252509	0.00923864	0.0250858	0.14044	0.484894	0.17105	0.00385311	0.0108985
FCA_GND8125924_CTACCCAAGGGTCGAT	0.00430962	0.00158156	0.00609121	0.00415864	0.00417747	0.00915823	0.0042568	0.105474	0.511976	0.0189141	0.0113544	0.00197269	0.00363542
FCA_GND8125924_CTAGAGTCATACGCTA	0.252921	0.0146838	0.00649827	0.0797067	0.00384038	0.0216486	0.57716	0.00366796	0.00488638	0.00159022	0.00313063	0.00418204	0.00783105
FCA_GND8125924_CTAGAGTTCATGCAAC	0.00344497	0.00344523	0.00560997	0.00541407	0.00517989	0.00521714	0.00443357	0.0513132	0.0603607	0.619678	0.0986624	0.00242332	0.00506944
FCA_GND8125924_CTAGCCTAGGACACCA	0.0997439	0.040874	0.0298769	0.0175065	0.458328	0.0735726	0.0822541	0.0191448	0.0721108	0.0146463	0.00902892	0.00916429	0.0135717
FCA_GND8125924_CTCAGAAAGCGCTCCA	0.0108121	0.00351271	0.00873858	0.00525069	0.0077452	0.0113425	0.00360172	0.0424274	0.793154	0.0324571	0.00317305	0.00190693	0.00395134
FCA_GND8125924_CTCAGAACAACTGCGC	0.0660157	0.075818	0.0180626	0.0362129	0.226948	0.279323	0.103922	0.0244432	0.0477817	0.0129278	0.00817873	0.00680289	0.0203807
FCA_GND8125924_CTCATTACACCAGATT	0.076742	0.0693227	0.0246971	0.0581204	0.23265	0.128877	0.237183	0.0144297	0.0370936	0.0136555	0.00796243	0.0076933	0.0249098
FCA_GND8125924_CTCCTAGTCCACGCAG	0.0419872	0.0552288	0.0273378	0.0309467	0.161364	0.405571	0.0686766	0.0196702	0.0787738	0.0153597	0.0102395	0.00686858	0.0138435
FCA_GND8125924_CTCGTACCACGGACAA	0.0958477	0.0333419	0.0487453	0.0223433	0.219718	0.187763	0.200314	0.0196354	0.0472184	0.011959	0.00801229	0.00911911	0.0297407
FCA_GND8125924_CTCTAATCACGCGAAA	0.0178594	0.0162541	0.00885318	0.018466	0.00468373	0.0200238	0.0111347	0.0437167	0.43953	0.177458	0.00852831	0.00538232	0.0074177
FCA_GND8125924_CTCTGGTAGGCCCGTT	0.0462018	0.0206543	0.011984	0.0225745	0.00476059	0.0685187	0.0180175	0.084455	0.621862	0.0189906	0.00397	0.00265927	0.00697927
FCA_GND8125924_CTCTGGTAGTCCCACG	0.123615	0.0384146	0.018157	0.0268551	0.165745	0.271439	0.0923515	0.0184155	0.0864752	0.0113003	0.00745149	0.00776587	0.0580094
FCA_GND8125924_CTGATAGTCTCCAACC	0.0295318	0.0435991	0.027314	0.0306731	0.350716	0.130158	0.125436	0.0354248	0.0574696	0.0165241	0.0145906	0.00686628	0.0307563
FCA_GND8125924_CTGCCTACAAGTTAAG	0.0109193	0.00902579	0.00553062	0.00824549	0.00269771	0.0104765	0.00448629	0.0397988	0.577282	0.213697	0.00673121	0.00303494	0.00341043
FCA_GND8125924_CTGGTCTCAATGGATA	0.0195444	0.0279862	0.0174369	0.058343	0.0945112	0.33009	0.0749018	0.0231306	0.167675	0.0283076	0.0107486	0.00505566	0.0350101
FCA_GND8125924_CTGGTCTGTCAAAGAT	0.0272514	0.0122608	0.0166942	0.0302544	0.00726119	0.0254623	0.0122001	0.0563894	0.111366	0.0790319	0.461781	0.00831321	0.0269512
FCA_GND8125924_CTGTGCTGTGCATCTA	0.0185124	0.00826177	0.00822677	0.0104711	0.00315512	0.0757689	0.0239761	0.0510277	0.730388	0.00918462	0.0032561	0.00224429	0.00523305
FCA_GND8125924_CTTAGGATCAGTACGT	0.000370996	0.00010155	0.985902	0.000807778	0.000376761	0.000479774	0.00124086	0.000135831	0.00026511	0.000190318	0.000453489	0.000672821	0.00861037
FCA_GND8125924_CTTCTCTGTGCGAAAC	0.0124467	0.00795946	0.0136436	0.0353173	0.0220874	0.142553	0.449936	0.0128075	0.0436915	0.0184228	0.0162702	0.00457803	0.0123646
FCA_GND8125924_GAAACTCTCGAATGGG	0.0499584	0.0602713	0.023711	0.0201088	0.136682	0.436205	0.0783202	0.0219072	0.0818008	0.0112219	0.0061261	0.00631879	0.0184516
FCA_GND8125924_GAAATGACAAACTGCT	0.0202157	0.010858	0.00611748	0.0163712	0.00284233	0.0333161	0.0144887	0.0642585	0.254968	0.0208656	0.0287119	0.00270614	0.00594458
FCA_GND8125924_GAACGGATCTTGCAAG	0.00543885	0.0037592	0.00481418	0.0047501	0.00150415	0.00596128	0.00236669	0.047601	0.577012	0.0242917	0.00458766	0.0015793	0.00215552
FCA_GND8125924_GAAGCAGTCGGTGTTA	0.0797967	0.0387829	0.0231765	0.0438829	0.101256	0.260263	0.244012	0.018101	0.0695859	0.0193312	0.011857	0.00617847	0.0309747
FCA_GND8125924_GAATAAGCATTACGAC	0.0677413	0.0100039	0.00651711	0.092156	0.00214142	0.0107291	0.727524	0.00437124	0.0117153	0.00225261	0.00417363	0.00512597	0.0048903
FCA_GND8125924_GACACGCCACGCCAGT	0.0181297	0.131261	0.017394	0.1486	0.138856	0.16813	0.208461	0.0276633	0.0391609	0.0136388	0.015049	0.00834214	0.0205272
FCA_GND8125924_GACCAATCAAGCCCAC	0.0225319	0.0441994	0.007258	0.01643	0.00183583	0.0360453	0.0110171	0.0178481	0.694129	0.076216	0.00215405	0.00266223	0.00385228
FCA_GND8125924_GACCTGGAGTCAAGCG	0.023732	0.0131254	0.00688862	0.0071155	0.00403055	0.0254612	0.0141996	0.051443	0.0835522	0.102522	0.0297927	0.00541605	0.00789552
FCA_GND8125924_GACGCGTGTCGGCATC	0.0070992	0.00474891	0.00216272	0.0071419	0.00145506	0.014447	0.0113146	0.0252397	0.696998	0.0227825	0.00214233	0.00159565	0.00290622
FCA_GND8125924_GACGTGCAGACAGACC	0.00388509	0.00373332	0.00933476	0.0024909	0.00668238	0.0116284	0.0060513	0.0116587	0.641919	0.0494415	0.0184389	0.00342918	0.00502747
FCA_GND8125924_GACGTGCGTCTCCATC	0.0742349	0.056458	0.0263287	0.0181563	0.119933	0.383684	0.0974895	0.0165538	0.0736193	0.0192772	0.00717047	0.00670843	0.0142811
FCA_GND8125924_GACGTTAAGGAACTGC	0.0104449	0.00461713	0.0054677	0.00345672	0.00232912	0.00448668	0.00372015	0.0383374	0.758009	0.0209665	0.00397086	0.00256315	0.00272681
FCA_GND8125924_GACTAACGTGTGTGCC	0.0179103	0.00640472	0.00781373	0.0166883	0.00612356	0.0201551	0.0249236	0.220342	0.518894	0.090815	0.0214486	0.00366452	0.00453428
FCA_GND8125924_GACTACAGTCAGATAA	0.0316633	0.0236963	0.0125462	0.0521047	0.00833429	0.1431	0.0894528	0.236305	0.234699	0.0262334	0.0158836	0.00688447	0.0296575
FCA_GND8125924_GACTGCGGTATATGGA	0.0138892	0.013604	0.0135839	0.0159053	0.00938965	0.0737605	0.0273112	0.0287005	0.134806	0.19943	0.0115223	0.00573172	0.0260374
FCA_GND8125924_GAGGTGAGTAAACCTC	0.0892627	0.0704159	0.01916	0.0300065	0.210478	0.224283	0.136497	0.0344328	0.0546574	0.0131653	0.00866101	0.00697902	0.0188251
FCA_GND8125924_GATGAAAGTCATTAGC	0.0718454	0.0205602	0.0224936	0.016671	0.0102979	0.0200244	0.020644	0.0612434	0.0944716	0.199293	0.0355547	0.00751217	0.0193499
FCA_GND8125924_GATTCAGCAGTCAGAG	0.204248	0.0489776	0.0222986	0.0264221	0.0661402	0.171959	0.183345	0.0237988	0.0937363	0.0196108	0.00930068	0.00786834	0.0223285
FCA_GND8125924_GATTCAGTCTGCCCTA	0.00287633	0.00282994	0.00430952	0.00330212	0.00132051	0.00392778	0.0017602	0.137857	0.517192	0.243395	0.00774963	0.00133508	0.00284064
FCA_GND8125924_GCAGTTACAGTATCTG	0.00589283	0.0079586	0.00556352	0.00701605	0.00186915	0.0224997	0.00381539	0.0301318	0.632846	0.247928	0.00976574	0.00211041	0.00420281
FCA_GND8125924_GCATGATGTGATGCCC	0.0116195	0.00548147	0.00389227	0.0194811	0.00299922	0.0129108	0.00774705	0.0215309	0.142699	0.00970469	0.00474518	0.00290811	0.00863814
FCA_GND8125924_GCCAAATAGAGTGAGA	0.047822	0.0610893	0.0387329	0.0172685	0.437924	0.132737	0.0823494	0.0144881	0.0619891	0.015812	0.00963186	0.00852578	0.0183849
FCA_GND8125924_GCCAAATCACCGAAAG	0.107669	0.0540103	0.0178652	0.0148532	0.00300687	0.224064	0.0241584	0.0213691	0.447727	0.00833049	0.0103271	0.00589196	0.00983695
FCA_GND8125924_GCCAAATGTTTGTGTG	0.00216281	0.00109517	0.00464345	0.00292524	0.00533142	0.0175611	0.00329048	0.0130241	0.392726	0.00883512	0.00216085	0.00241721	0.00417108
FCA_GND8125924_GCGAGAAAGTGAATTG	0.00548252	0.00468699	0.00678081	0.00861492	0.0057158	0.0190967	0.0211625	0.0115794	0.0386165	0.12575	0.00944209	0.0025159	0.00386276
FCA_GND8125924_GCGAGAAGTACAGTTC	0.112201	0.0596613	0.0191651	0.0196921	0.031668	0.533992	0.0426622	0.0119518	0.0802562	0.00738039	0.00301632	0.00389799	0.0135205
FCA_GND8125924_GCGCAACAGTTTGCGT	0.0677921	0.0306072	0.00869502	0.0116814	0.00200246	0.0586226	0.0386093	0.0528595	0.668202	0.0198219	0.00338833	0.00425478	0.00501694
FCA_GND8125924_GCGCAGTGTTCGGCAC	0.00763112	0.00954806	0.00773909	0.00878096	0.00380042	0.00937374	0.00484202	0.0455656	0.136007	0.277824	0.0591221	0.00373671	0.00750182
FCA_GND8125924_GCGCGATTCTATCCCG	0.00326908	0.00442844	0.00223833	0.00535163	0.00214576	0.0165425	0.00310793	0.00947327	0.10084	0.0119551	0.0101373	0.00271679	0.0127435
FCA_GND8125924_GCTCCTACAGTAAGAT	0.0166922	0.0231568	0.0054385	0.0159385	0.00279863	0.0151497	0.0140577	0.0195073	0.730546	0.00972391	0.00162061	0.00309913	0.00330914
FCA_GND8125924_GCTCTGTGTCTGCGGT	0.0694262	0.0525697	0.022412	0.0211324	0.272744	0.304563	0.0558025	0.0161556	0.0744814	0.0127951	0.00802505	0.0063834	0.0123927
FCA_GND8125924_GCTGCTTGTCTAAAGA	0.0118904	0.0115999	0.00771713	0.0160046	0.00239375	0.0261038	0.0147627	0.0278518	0.170794	0.142975	0.00649435	0.00294408	0.00604864
FCA_GND8125924_GCTGGGTAGTATCTCG	0.0456593	0.0252873	0.0250919	0.0282309	0.473547	0.0970193	0.15527	0.0104378	0.0344217	0.00800442	0.0089625	0.0117766	0.023277
FCA_GND8125924_GCTGGGTTCTGACCTC	0.035154	0.0397229	0.0237216	0.0288896	0.177118	0.186644	0.184185	0.0323289	0.100766	0.0167583	0.0102806	0.00742354	0.0566144
FCA_GND8125924_GCTTCCACAGTCAGAG	0.0106931	0.00794913	0.00158352	0.00629967	0.00136136	0.0063268	0.00379108	0.00667591	0.00663491	0.00512743	0.00211666	0.00458413	0.913744
FCA_GND8125924_GCTTCCAGTGACGGTA	0.00954376	0.00651018	0.00527809	0.00655108	0.00516257	0.00734591	0.00618578	0.545372	0.271795	0.0819968	0.010805	0.00283167	0.00450112
FCA_GND8125924_GGAATAAGTCGGGTCT	0.0467097	0.029291	0.0317247	0.0192422	0.00657418	0.264972	0.0435565	0.0207988	0.236057	0.0108864	0.00979902	0.00664364	0.0201256
FCA_GND8125924_GGACAGATCTTAGAGC	0.0585784	0.0565231	0.0235424	0.0236298	0.119931	0.451547	0.0801404	0.0227371	0.0641495	0.0119245	0.00602478	0.00582784	0.0196739
FCA_GND8125924_GGACATTGTGCTTCTC	0.0230084	0.0172891	0.00539449	0.0178029	0.00200828	0.0453169	0.0117104	0.0292568	0.402394	0.0322409	0.00549446	0.00226116	0.0043943
FCA_GND8125924_GGACATTTCCATGCTC	0.00924443	0.00590777	0.00838678	0.0107347	0.00653818	0.0231385	0.0177189	0.0692183	0.253851	0.0406147	0.450117	0.00479621	0.00845877
FCA_GND8125924_GGCAATTTCCTTAATC	0.0974381	0.0740185	0.0332811	0.0307592	0.26056	0.219582	0.110795	0.0197416	0.0560161	0.0168992	0.00828945	0.0076933	0.0123702
FCA_GND8125924_GGCCGATTCCGTCAAA	0.0309174	0.0153428	0.0103856	0.0130541	0.00418781	0.063762	0.0264823	0.110027	0.295593	0.0310017	0.00631587	0.00401464	0.00958815
FCA_GND8125924_GGCGACTTCAGTTAGC	0.0713892	0.0908032	0.0229019	0.0349576	0.180439	0.357917	0.0636372	0.0256146	0.0467861	0.0116862	0.00723599	0.00624078	0.017378
FCA_GND8125924_GGCGTGTAGAAGATTC	0.0298974	0.0339083	0.0190388	0.0196692	0.00792954	0.0411111	0.0128366	0.216308	0.345265	0.0494948	0.0798344	0.00810338	0.00980035
FCA_GND8125924_GGCTCGATCTGCCCTA	0.0456611	0.00299204	0.00213402	0.0439312	0.00208192	0.00181669	0.881244	0.0013398	0.00115432	0.000726695	0.00115628	0.00328144	0.00119394
FCA_GND8125924_GGCTGGTAGAGGTTGC	0.124202	0.0360845	0.0199713	0.0280172	0.0861968	0.189585	0.280853	0.0277673	0.0744827	0.0151649	0.00988748	0.0071618	0.0191443
FCA_GND8125924_GGGAGATTCCCACTTG	0.0114567	0.00417836	0.0176508	0.00402197	0.00476729	0.0114663	0.0102888	0.0380639	0.56041	0.214578	0.0166963	0.00291877	0.00419081
FCA_GND8125924_GGGATGACAGATTGCT	0.018701	0.0101437	0.005059	0.017141	0.0017522	0.0410931	0.0154767	0.0113058	0.808824	0.00814517	0.0100103	0.0019499	0.00422605
FCA_GND8125924_GGGATGAGTTTGCATG	0.0803771	0.0316686	0.0112515	0.0504692	0.00465702	0.179553	0.0223886	0.015005	0.122635	0.00839463	0.0084134	0.00626315	0.0220393
FCA_GND8125924_GGGCATCTCCGCGCAA	0.00939283	0.00466325	0.00674013	0.00753968	0.0038761	0.0156456	0.006046	0.0822243	0.561687	0.0913521	0.140144	0.00276292	0.00654362
FCA_GND8125924_GGTATTGGTCAGTGGA	0.0485231	0.0504178	0.0286517	0.0253695	0.384117	0.144042	0.0732646	0.0208272	0.059362	0.0244593	0.0107214	0.00740199	0.0283188
FCA_GND8125924_GGTGCGTCAGTATCTG	0.0790981	0.0435962	0.023075	0.0653861	0.132561	0.237594	0.197661	0.0137213	0.0410432	0.0161059	0.00787376	0.00630304	0.0792341
FCA_GND8125924_GTAACGTTCTGTTGAG	0.0202648	0.00763804	0.0116888	0.00935467	0.00525792	0.0114397	0.00837879	0.304989	0.511319	0.0281364	0.00824469	0.00465074	0.0133335
FCA_GND8125924_GTACTCCAGACATAAC	0.00916541	0.00798367	0.00409506	0.0112192	0.00262911	0.0196931	0.00735209	0.0812113	0.675379	0.102755	0.00392226	0.00314713	0.00984903
FCA_GND8125924_GTACTCCAGATGGGTC	0.00778919	0.00389425	0.00289993	0.00840427	0.00294171	0.0124559	0.00404062	0.0627381	0.777044	0.0228816	0.00261345	0.00311981	0.00394728
FCA_GND8125924_GTACTCCTCTGAAAGA	0.0396292	0.0424733	0.0229106	0.0172718	0.446817	0.200745	0.0905927	0.0151228	0.0412077	0.0135696	0.00823543	0.00684864	0.0168549
FCA_GND8125924_GTACTTTAGCACACAG	0.0134878	0.0101606	0.00581992	0.00458188	0.00117979	0.0390372	0.00890225	0.0175701	0.8547	0.00882638	0.00557673	0.00228762	0.00290572
FCA_GND8125924_GTCATTTCACTTCGAA	0.088693	0.128413	0.0135324	0.0292806	0.234238	0.164388	0.0953472	0.0290048	0.0894676	0.00884418	0.00669441	0.0084626	0.0130281
FCA_GND8125924_GTCCTCACACGGTAAG	0.00407742	0.00182456	0.00231212	0.0014405	0.00147453	0.00472806	0.00165579	0.0202222	0.932037	0.0153151	0.0017857	0.00113643	0.00119317
FCA_GND8125924_GTCGGGTCAAATTGCC	0.423114	0.2871	0.0189977	0.0650913	0.00614548	0.0277433	0.0804047	0.00936875	0.0249668	0.00548341	0.00458019	0.00348384	0.00649402
FCA_GND8125924_GTCTCGTAGATACACA	0.0221591	0.0560944	0.0147119	0.0183871	0.707483	0.0402243	0.0494352	0.0155805	0.0265391	0.00849071	0.00623014	0.00499812	0.00517639
FCA_GND8125924_GTCTCGTTCGCTGATA	0.042391	0.0428422	0.0272353	0.0257284	0.330332	0.263276	0.0811018	0.0168196	0.0397685	0.0140714	0.00934411	0.00669056	0.0199954
FCA_GND8125924_GTCTTCGGTGTAATGA	0.00100148	0.000577249	0.00115301	0.000753224	0.00121891	0.00198689	0.00115864	0.0838353	0.891379	0.00889481	0.00252585	0.000918362	0.000523711
FCA_GND8125924_GTGCAGCAGAGAACAG	0.0165735	0.00481492	0.0048302	0.0186861	0.00352226	0.0396512	0.0283973	0.0453099	0.328013	0.0164916	0.0046701	0.00442352	0.0164007
FCA_GND8125924_GTGCGGTGTAGCTAAA	0.00898945	0.00373561	0.00287385	0.011013	0.00103189	0.00570764	0.00265548	0.0202026	0.549849	0.0482092	0.00504665	0.00157763	0.00173904
FCA_GND8125924_GTGCTTCTCAGCCTAA	0.00394717	0.00508262	0.00132743	0.00630097	0.000922647	0.00568455	0.00257013	0.00574198	0.837217	0.00371626	0.0047059	0.00198356	0.00206632
FCA_GND8125924_GTGGGTCCAATAGAGT	0.00507921	0.00650454	0.00577743	0.0111412	0.00306602	0.0102284	0.00637313	0.0173524	0.150855	0.0220194	0.00509442	0.00230134	0.00329466
FCA_GND8125924_GTGTGCGTCACTTACT	0.0414571	0.0225025	0.0173774	0.0144795	0.00609788	0.022899	0.0105093	0.0875968	0.348584	0.320559	0.00803523	0.00518631	0.00648049
FCA_GND8125924_GTGTTAGCAGTACACT	0.219787	0.00662697	0.00594769	0.0184248	0.00257747	0.0187666	0.688871	0.00220354	0.00431023	0.00104577	0.00372388	0.00238931	0.00346982
FCA_GND8125924_GTTACAGGTAAACCTC	0.0992787	0.0580944	0.0387475	0.0296522	0.226375	0.261956	0.111321	0.0208513	0.0592819	0.0140063	0.00960272	0.00833836	0.020183
FCA_GND8125924_GTTACAGTCAGGCAAG	0.00612958	0.00530643	0.00473055	0.00835708	0.00435451	0.00773249	0.0053325	0.0966213	0.177931	0.606566	0.015146	0.0035497	0.00640563
FCA_GND8125924_GTTCATTCAGACAGGT	0.00463063	0.0018958	0.00106216	0.0510214	0.0017858	0.00624854	0.915213	0.000840879	0.00237792	0.000580385	0.00105021	0.00205201	0.00191663
FCA_GND8125924_GTTCGGGCAGACGCCT	0.0288119	0.0160944	0.00996765	0.0286038	0.0262246	0.0088977	0.0200553	0.168451	0.537904	0.0212134	0.00923061	0.00333184	0.00822227
FCA_GND8125924_GTTCTCGCAAGGCTCC	0.102604	0.0280309	0.0105133	0.0445716	0.00272672	0.0168391	0.724697	0.00542157	0.00826037	0.00195396	0.00358441	0.0038229	0.00507706
FCA_GND8125924_GTTCTCGCATGGTCTA	0.0497349	0.0340466	0.0472231	0.0195507	0.191922	0.0595205	0.125655	0.051684	0.100469	0.0615054	0.037537	0.00801784	0.0257578
FCA_GND8125924_GTTTCTACACTTGGAT	0.00463429	0.00163358	0.00170409	0.00337987	0.00133034	0.0154628	0.00232839	0.0209913	0.727378	0.0242474	0.00127373	0.00153904	0.00238895
FCA_GND8125924_TAAGCGTAGTGAAGTT	0.0359913	0.0373681	0.0298071	0.0207156	0.370426	0.275238	0.069208	0.0163149	0.0551644	0.0189573	0.00650405	0.00700994	0.0137526
FCA_GND8125924_TAAGTGCAGTAAGTAC	0.0121833	0.0173137	0.00914461	0.0224835	0.79956	0.0236986	0.0700537	0.00406942	0.00702274	0.00252069	0.00403831	0.00435639	0.00435248
FCA_GND8125924_TACCTATTCCCTGACT	0.0447239	0.0519488	0.0260018	0.0310613	0.397394	0.13915	0.119799	0.0218849	0.0331326	0.0124835	0.00786839	0.00650858	0.0248615
FCA_GND8125924_TACTCGCAGAGATGAG	0.00455932	0.00395929	0.0054871	0.00567012	0.00493461	0.00869487	0.00653951	0.0555062	0.233679	0.311663	0.0162575	0.00363743	0.00681486
FCA_GND8125924_TACTCGCTCTGATACG	0.0132294	0.0106436	0.00946609	0.00869322	0.00337183	0.0197221	0.0124863	0.205207	0.515708	0.0677434	0.00753899	0.00292884	0.00890693
FCA_GND8125924_TACTTACCAGTCCTTC	0.00416405	0.00393976	0.0055141	0.0065492	0.00329893	0.0128292	0.00861147	0.0652243	0.555439	0.13616	0.0101648	0.00325016	0.00542995
FCA_GND8125924_TACTTACGTTCACGGC	0.0256324	0.797287	0.00514729	0.00736828	0.00163418	0.00343004	0.00282893	0.00245787	0.00514901	0.00230368	0.00222494	0.0749477	0.00218472
FCA_GND8125924_TAGACCATCGTAGGTT	0.0105759	0.00555321	0.0015255	0.00465127	0.000732182	0.00652312	0.00363474	0.00317942	0.00597444	0.00276977	0.0017804	0.00232147	0.934011
FCA_GND8125924_TAGCCGGGTTCGAATC	0.00696059	0.00438079	0.00910316	0.0034107	0.00785795	0.00671398	0.0108929	0.0309417	0.862073	0.0238996	0.00653278	0.0018474	0.00220868
FCA_GND8125924_TATCAGGTCGGTGTCG	0.0132029	0.026286	0.00972132	0.0157563	0.00385511	0.026712	0.0111734	0.107289	0.300096	0.110765	0.213034	0.00710459	0.00979852
FCA_GND8125924_TCACAAGGTCGCCATG	0.0682481	0.0539769	0.0288627	0.0292152	0.402979	0.112141	0.0862139	0.0214391	0.0752038	0.013195	0.00772237	0.00829376	0.0247944
FCA_GND8125924_TCACGAACAGTTTACG	0.0617609	0.0503742	0.0184109	0.0286974	0.214368	0.268598	0.101068	0.0334464	0.0749012	0.0160648	0.0123078	0.00843567	0.0224379
FCA_GND8125924_TCACGAATCCAAACAC	0.010386	0.016272	0.0183531	0.0487735	0.0146135	0.401798	0.0271974	0.0111364	0.0308998	0.0110045	0.0370498	0.0150391	0.16248
FCA_GND8125924_TCAGCAAAGATCCGAG	0.0489929	0.0327659	0.0249571	0.0208676	0.49311	0.100863	0.0559474	0.0270818	0.0499449	0.0224342	0.0105929	0.00716661	0.0208303
FCA_GND8125924_TCAGCAAAGCGATATA	0.0237724	0.0333261	0.0191429	0.0108434	0.614615	0.112592	0.0589972	0.0132048	0.0294905	0.00808373	0.00625491	0.00735567	0.0183649
FCA_GND8125924_TCAGCTCCATCCGTGG	0.0244681	0.0218564	0.0190574	0.0141805	0.645024	0.0774314	0.0723356	0.0133454	0.033328	0.0105002	0.00718295	0.00726353	0.0146305
FCA_GND8125924_TCAGCTCTCATCATTC	0.0452257	0.05298	0.0255703	0.0303377	0.447386	0.11489	0.0933499	0.0249558	0.0598858	0.0133667	0.00858884	0.00675653	0.0137169
FCA_GND8125924_TCAGGATTCACTGGGC	0.0529451	0.0202907	0.0205685	0.0181798	0.0118076	0.0124655	0.0100388	0.0417843	0.0952239	0.445491	0.0111801	0.00735964	0.0212292
FCA_GND8125924_TCCACACAGTTTAGGA	0.0332161	0.0239273	0.0167209	0.0118189	0.553386	0.139803	0.0432066	0.0157556	0.0677841	0.0114579	0.00659343	0.00701607	0.0130905
FCA_GND8125924_TCGCGTTCAAACCTAC	0.13494	0.0973564	0.0258191	0.0784691	0.131802	0.18737	0.133526	0.0192881	0.0679237	0.0204899	0.010174	0.00827006	0.0223868
FCA_GND8125924_TCGGTAATCACCACCT	0.208164	0.0110223	0.00531094	0.0856069	0.00200339	0.0184947	0.626847	0.00403314	0.00496548	0.00187481	0.00261353	0.00275165	0.00275764
FCA_GND8125924_TCGTACCAGGATTCGG	0.0131503	0.00869008	0.00364143	0.0127513	0.00194612	0.0189606	0.00997485	0.137125	0.613049	0.0457115	0.00722953	0.00321117	0.00736204
FCA_GND8125924_TCGTACCCACGGCGTT	0.0142867	0.0087157	0.0057738	0.00835871	0.00193941	0.00724096	0.00621919	0.0372402	0.780035	0.017048	0.0262345	0.00514003	0.00620442
FCA_GND8125924_TCGTAGACACACAGAG	0.102026	0.0405817	0.0259136	0.0305353	0.125559	0.203727	0.12383	0.0381481	0.142423	0.0225732	0.0118351	0.00822475	0.0162404
FCA_GND8125924_TCTGAGAAGTGGTCCC	0.201289	0.0781307	0.016217	0.0367097	0.00257066	0.366721	0.0292041	0.0132561	0.198123	0.00858919	0.00289762	0.00316718	0.00518219
FCA_GND8125924_TCTTCGGTCGCCCTTA	0.0194285	0.00296685	0.0014878	0.0486596	0.000594515	0.00235299	0.914409	0.00103979	0.000631176	0.000604661	0.00097029	0.00136325	0.000548764
FCA_GND8125924_TCTTTCCGTAGCGATG	0.0527857	0.0422447	0.0301676	0.0178299	0.121236	0.486711	0.0715353	0.0163222	0.0709955	0.0151364	0.00914917	0.00544119	0.0127401
FCA_GND8125924_TCTTTCCTCACTGGGC	0.0133115	0.0050206	0.00552852	0.00531108	0.00236774	0.0127143	0.00230443	0.00772296	0.041623	0.00758736	0.00291194	0.0033128	0.865864
FCA_GND8125924_TGACTAGAGCCCAGCT	0.00730298	0.00705295	0.00623689	0.00686721	0.00249579	0.016781	0.00652673	0.0414282	0.582824	0.0378077	0.182253	0.00420191	0.00937434
FCA_GND8125924_TGACTAGCAATTCCTT	0.00303871	0.00100703	0.00145342	0.00225064	0.000956707	0.00470037	0.00269375	0.0713881	0.879275	0.0191045	0.00205542	0.00199788	0.00152484
FCA_GND8125924_TGACTTTAGGAGCGAG	0.0169884	0.0072314	0.00759043	0.00736294	0.00442979	0.0202865	0.0193771	0.0630805	0.681839	0.115515	0.00513398	0.00410708	0.00587688
FCA_GND8125924_TGAGCATGTGGACGAT	0.0761698	0.0286024	0.0140487	0.0343546	0.00721782	0.260575	0.041986	0.0300445	0.301062	0.0205343	0.0101524	0.0062245	0.0318751
FCA_GND8125924_TGAGCCGAGCGCTCCA	0.0536503	0.198614	0.0259687	0.0561028	0.163849	0.127465	0.158539	0.0435111	0.061914	0.0195154	0.0108071	0.0113556	0.0124667
FCA_GND8125924_TGAGGGAGTACCGGCT	0.0186082	0.0178301	0.00858494	0.0228626	0.00293753	0.143633	0.0221062	0.0442217	0.459541	0.0171172	0.00863369	0.00340861	0.00708614
FCA_GND8125924_TGATTTCCAGGGAGAG	0.113788	0.0378616	0.0175239	0.0528232	0.00810686	0.130212	0.0283154	0.0592344	0.382824	0.0117248	0.0156632	0.00599308	0.011981
FCA_GND8125924_TGATTTCTCCACGTTC	0.0705186	0.0354329	0.0219902	0.0380283	0.0562906	0.571973	0.0789837	0.0098438	0.0377132	0.00971078	0.00677876	0.00475803	0.0136531
FCA_GND8125924_TGCACCTGTCGAATCT	0.00259477	0.00201553	0.00125106	0.00134393	0.000563384	0.00506538	0.00125172	0.00201336	0.00807822	0.00584675	0.00102787	0.00169989	0.958303
FCA_GND8125924_TGCCAAATCAAGATCC	0.0494623	0.0267067	0.0313888	0.0206882	0.375763	0.196922	0.0530925	0.0179002	0.061812	0.0107641	0.00911493	0.00809634	0.0358321
FCA_GND8125924_TGCCCATTCCATGCTC	0.0055108	0.00445475	0.00439706	0.00471208	0.0044544	0.00904506	0.00437344	0.0216721	0.658695	0.120585	0.0133887	0.00311283	0.00380278
FCA_GND8125924_TGCCCTACATAGACTC	0.00580444	0.00454236	0.00331963	0.00589254	0.00204604	0.0139597	0.00492113	0.0453453	0.737523	0.0875716	0.0192243	0.00279547	0.00240507
FCA_GND8125924_TGCGGGTTCACTTACT	0.00528512	0.00617794	0.00665673	0.00911052	0.00336778	0.0131037	0.00838997	0.0176187	0.083267	0.720122	0.0300893	0.00310425	0.00476545
FCA_GND8125924_TGCTACCGTTTGGCGC	0.0617784	0.037989	0.019553	0.024685	0.303275	0.242499	0.122464	0.0152973	0.0629286	0.00989527	0.00659007	0.00744861	0.0218442
FCA_GND8125924_TGCTGCTCACGAGGTA	0.00950349	0.0107804	0.00595225	0.0170107	0.00178915	0.0479648	0.037106	0.0368793	0.695572	0.0220077	0.00426549	0.00321133	0.0039045
FCA_GND8125924_TGCTGCTTCAAACGGG	0.0328844	0.0102881	0.00523258	0.0111067	0.0039402	0.0296251	0.874099	0.00212963	0.00604622	0.00119025	0.00126489	0.0035427	0.00331957
FCA_GND8125924_TGGACGCAGAGGGATA	0.00853314	0.00128473	0.000769686	0.0186155	0.00170428	0.0024039	0.956698	0.00083931	0.000621397	0.000483509	0.000860758	0.00161676	0.000664944
FCA_GND8125924_TGGCCAGTCGTTACAG	0.0143969	0.0328515	0.017744	0.0140469	0.530239	0.152273	0.0486186	0.0149088	0.0696178	0.012004	0.00839598	0.00559877	0.0122075
FCA_GND8125924_TGGGCGTCAAAGGTGC	0.0213712	0.0176903	0.0175839	0.0246236	0.274957	0.233422	0.0785631	0.0280739	0.112285	0.0179351	0.0103204	0.00770074	0.046926
FCA_GND8125924_TGTGGTACAGAGCCAA	0.0172657	0.0470287	0.0186779	0.0230545	0.415558	0.210962	0.0957426	0.0201928	0.0609349	0.0118089	0.00931492	0.00629232	0.0144049
FCA_GND8125924_TGTGTTTGTCTCATCC	0.0474613	0.0161033	0.0230951	0.0188404	0.0101523	0.267964	0.0248436	0.0779123	0.23326	0.0991388	0.018552	0.00720025	0.0862384
FCA_GND8125924_TGTGTTTTCTGCCAGG	0.074124	0.0752214	0.0346754	0.0300762	0.373596	0.0836821	0.117875	0.015706	0.0428078	0.0128936	0.00859408	0.0105581	0.0357203
FCA_GND8125924_TGTTCCGCATCGGGTC	0.0526698	0.00593267	0.00238729	0.0767217	0.000807244	0.0129496	0.826257	0.00139966	0.00228432	0.00117888	0.00153346	0.00189684	0.00163417
FCA_GND8125924_TTAGTTCAGTGTACTC	0.00440523	0.00535908	0.0040624	0.00637538	0.00162655	0.00979691	0.00348432	0.00450427	0.0166728	0.899008	0.00683044	0.00253989	0.00292934
FCA_GND8125924_TTCCCAGGTACCGAGA	0.00740246	0.00425943	0.00513322	0.00558991	0.00158568	0.0234921	0.00515512	0.0171598	0.449041	0.0313848	0.00876968	0.00145826	0.00311081
FCA_GND8125924_TTCGGTCCATGGGACA	0.00173019	0.00292288	0.00127422	0.00272452	0.0010102	0.00491219	0.00287512	0.0530812	0.904651	0.00460275	0.0018425	0.00106456	0.00119721
FCA_GND8125924_TTCTCAACAGGACGTA	0.0594704	0.0371378	0.0440775	0.0250412	0.136687	0.258637	0.231683	0.0169381	0.0419192	0.0148688	0.00999574	0.00845325	0.049079
FCA_GND8125924_TTCTCAACATGTAAGA	0.00852911	0.0124364	0.00773931	0.0158753	0.00345454	0.0280218	0.0113889	0.0421832	0.590267	0.0392084	0.100605	0.00489074	0.00925967
FCA_GND8125924_TTCTCAAGTGCGATAG	0.0512396	0.0365308	0.0250931	0.0128478	0.375727	0.261442	0.0758944	0.0158381	0.0509442	0.0114544	0.00720098	0.00793602	0.0197447
FCA_GND8125924_TTCTCAATCTGACCTC	0.0054854	0.00286484	0.00401426	0.00368704	0.00216156	0.0310147	0.00449395	0.0115595	0.0263139	0.0133071	0.0108628	0.00216036	0.765128
FCA_GND8125924_TTCTTAGCACGGTTTA	0.00494961	0.0035549	0.00272636	0.00743248	0.00213942	0.0133745	0.00404752	0.081834	0.710447	0.0117212	0.00818805	0.00224062	0.00827401
FCA_GND8125924_TTGACTTCAATAGAGT	0.00745469	0.00542003	0.00323447	0.00450158	0.00113828	0.00674084	0.00353317	0.094985	0.750557	0.101643	0.00235595	0.00186561	0.00196406
FCA_GND8125924_TTGACTTTCGGCGCTA	0.0109364	0.00502087	0.00378239	0.0087796	0.00285622	0.0154251	0.0105306	0.0633881	0.285969	0.0227276	0.00648126	0.00215447	0.00429239
FCA_GND8125924_TTGCCGTAGCATGGCA	0.0129094	0.00926444	0.00762681	0.0143289	0.0045379	0.013744	0.0144939	0.0269279	0.114396	0.440148	0.0295075	0.00393304	0.00445291
FCA_GND8125924_TTGGCAAAGTGGTAGC	0.0176699	0.0115646	0.00778141	0.00627934	0.00223548	0.0282557	0.0109517	0.157703	0.717291	0.0148633	0.00614555	0.00227812	0.00327936
FCA_GND8125924_TTTGCGCTCTGAGTGT	0.0365217	0.0388221	0.0333976	0.0139316	0.354618	0.23734	0.0837503	0.0179204	0.0639358	0.0156967	0.00996446	0.00722719	0.0221858
FCA_GND8125924_TTTGGTTCAATAACGA	0.0343939	0.0331215	0.0271509	0.0369895	0.1545	0.290839	0.117608	0.0173339	0.0803878	0.0151465	0.00962736	0.00840548	0.0555063
FCA_GND8103049_AAACCTGAGCAATATG	0.155538	0.023204	0.0333846	0.0164652	0.0574215	0.228904	0.14202	0.0273014	0.16678	0.0151283	0.00861156	0.00829374	0.0292373
FCA_GND8103049_AAACCTGAGCTGTTCA	0.109606	0.0560576	0.0735221	0.0239157	0.264824	0.133559	0.109972	0.0184355	0.0913711	0.0170362	0.00902651	0.00981473	0.0210924
FCA_GND8103049_AAACCTGAGGTGTTAA	0.00356249	0.00394185	0.00410111	0.00782912	0.00201134	0.0133951	0.00716509	0.0246243	0.669376	0.0220077	0.00162914	0.00183473	0.00397437
FCA_GND8103049_AAACCTGCAAACTGCT	0.0161154	0.00722189	0.00724295	0.00948755	0.0040256	0.160559	0.0094705	0.0117013	0.531841	0.00778619	0.00461077	0.00302435	0.00723602
FCA_GND8103049_AAACCTGCAAGTTGTC	0.0241897	0.0349526	0.0136701	0.0162092	0.56976	0.110537	0.135027	0.0094103	0.0283058	0.00744818	0.00568359	0.00625643	0.00953041
FCA_GND8103049_AAACCTGCACCAACCG	0.130716	0.0894355	0.0178497	0.0985814	0.0761626	0.127165	0.23911	0.0202923	0.0611688	0.011552	0.00874334	0.00907391	0.0162565
FCA_GND8103049_AAACCTGGTGCGCTTG	0.00322699	0.00176766	0.00284078	0.00279254	0.00129368	0.0067924	0.00289932	0.0464512	0.808165	0.074623	0.00362714	0.00174947	0.00219173
FCA_GND8103049_AAACCTGTCCTAGGGC	0.0866485	0.0588464	0.0399834	0.0250249	0.214903	0.321857	0.0913881	0.0127981	0.0679788	0.0106199	0.00696891	0.00711072	0.0123201
FCA_GND8103049_AAACCTGTCGAGCCCA	0.0230379	0.0217335	0.0106293	0.0262601	0.00239689	0.0506009	0.0375835	0.0284302	0.118329	0.0204753	0.0215182	0.00348641	0.0342925
FCA_GND8103049_AAACCTGTCGCTAGCG	0.193928	0.0382056	0.016028	0.168888	0.0140218	0.0910792	0.322713	0.0115205	0.0259182	0.00982326	0.0075959	0.00890455	0.0148708
FCA_GND8103049_AAACCTGTCTATCCCG	0.039861	0.0127435	0.019808	0.0177172	0.00879432	0.0184853	0.0150482	0.175688	0.502381	0.0389966	0.00677144	0.00648688	0.015987
FCA_GND8103049_AAACGGGAGCAATATG	0.120784	0.0147555	0.0113716	0.0294491	0.00698989	0.033349	0.020352	0.00703271	0.0404255	0.0110888	0.00864818	0.00481715	0.635802
FCA_GND8103049_AAACGGGAGCTAGTCT	0.00997256	0.0113095	0.00311019	0.0110956	0.00200337	0.0194061	0.00533255	0.0163876	0.0778361	0.014672	0.0072922	0.00171335	0.0198197
FCA_GND8103049_AAACGGGGTACTCTCC	0.000761985	0.000661334	0.00331929	0.00176797	0.00017811	0.00121714	0.000573224	0.000292065	0.000522875	0.000492322	0.000424642	0.000479268	0.987135
FCA_GND8103049_AAACGGGGTGACCAAG	0.0345154	0.0354514	0.0537859	0.018314	0.516869	0.0313538	0.125397	0.0172082	0.0516284	0.0133454	0.00990377	0.012243	0.0224625
FCA_GND8103049_AAACGGGTCAACACTG	0.018691	0.0154001	0.00753669	0.0123783	0.00481524	0.00735316	0.00646948	0.0152245	0.462706	0.0289328	0.012394	0.00212645	0.00272637
FCA_GND8103049_AAACGGGTCATATCGG	0.0644534	0.0504354	0.0126252	0.0240788	0.0110072	0.0533918	0.717493	0.00558257	0.0184149	0.00360385	0.00421147	0.00365875	0.00967864
FCA_GND8103049_AAACGGGTCCATGAGT	0.0674352	0.0284226	0.0302071	0.0210585	0.428496	0.10899	0.102028	0.0188973	0.0675671	0.0202733	0.00843836	0.00859749	0.0223019
FCA_GND8103049_AAACGGGTCCCACTTG	0.013522	0.028988	0.00800311	0.0152148	0.0230722	0.236439	0.038879	0.00837166	0.021253	0.0057913	0.00655806	0.00303108	0.118856
FCA_GND8103049_AAAGATGAGGTACTCT	0.0664613	0.0182546	0.0113152	0.0432469	0.00397384	0.0476324	0.0273914	0.0116807	0.0286978	0.0136783	0.00700002	0.0048896	0.518133
FCA_GND8103049_AAAGATGCAAATCCGT	0.00774104	0.00854817	0.00436744	0.0126187	0.00265136	0.0253049	0.00403709	0.0208744	0.677171	0.0144338	0.00248258	0.00206903	0.00208643
FCA_GND8103049_AAAGATGCACGTCTCT	0.0136383	0.00832908	0.00387656	0.0217508	0.00263535	0.0953012	0.014734	0.00729041	0.224676	0.00826963	0.00500781	0.00276717	0.00751035
FCA_GND8103049_AAAGATGCAGGCGATA	0.00507907	0.00518773	0.00369262	0.00702112	0.00180843	0.007668	0.00373782	0.0299547	0.225957	0.0291848	0.00355741	0.00292146	0.00283138
FCA_GND8103049_AAAGATGGTATTCTCT	0.0136304	0.0178037	0.0181944	0.0128328	0.00854393	0.00378189	0.00422463	0.00349986	0.00805711	0.00276511	0.00317714	0.00504443	0.00357597
FCA_GND8103049_AAAGATGGTCAATGTC	0.0503861	0.0139844	0.00486281	0.0300075	0.00340661	0.0369767	0.0112713	0.00680537	0.0423926	0.00925869	0.00772455	0.00407134	0.725007
FCA_GND8103049_AAAGATGGTGGGTATG	0.0119357	0.00489151	0.00239798	0.00735569	0.00176446	0.0156807	0.00463007	0.00856749	0.0144217	0.0113038	0.0140452	0.00203167	0.720547
FCA_GND8103049_AAAGATGGTTAAGAAC	0.0186571	0.00637511	0.00236504	0.018496	0.00122467	0.0107511	0.00662211	0.00293768	0.00479553	0.00330646	0.00259405	0.00317874	0.890419
FCA_GND8103049_AAAGATGTCGTCCAGG	0.00290192	0.00367933	0.00135415	0.00184697	0.00109856	0.00666931	0.0018101	0.00136387	0.0027082	0.00132583	0.00109654	0.00305867	0.965706
FCA_GND8103049_AAAGATGTCGTGGACC	0.109862	0.103149	0.0155548	0.0288194	0.0372896	0.46786	0.0685657	0.0147478	0.0606421	0.00814342	0.00456114	0.00447495	0.0112441
FCA_GND8103049_AAAGCAACACATTTCT	0.0115977	0.00964655	0.00607671	0.00549546	0.00109534	0.0207584	0.00682406	0.122432	0.738856	0.0521157	0.00273659	0.0020738	0.00398724
FCA_GND8103049_AAAGCAACACCCATGG	0.00408332	0.00791247	0.00312363	0.00542339	0.00114201	0.0284892	0.00675352	0.0105468	0.417611	0.0128051	0.00272459	0.00179798	0.00578288
FCA_GND8103049_AAAGCAACACTACAGT	0.264823	0.0390331	0.018586	0.106172	0.00742331	0.103362	0.359363	0.00646686	0.0185188	0.00545237	0.00510352	0.00512328	0.00595458
FCA_GND8103049_AAAGCAACATGACATC	0.00790245	0.00266771	0.00367378	0.00546454	0.00173435	0.00445654	0.00340495	0.0844527	0.662559	0.0236511	0.004048	0.00249846	0.00447007
FCA_GND8103049_AAAGCAAGTAATTGGA	0.0150462	0.0233684	0.0138301	0.0113721	0.669875	0.108709	0.0706853	0.00749499	0.0170647	0.0060487	0.00377618	0.00526233	0.0156828
FCA_GND8103049_AAAGCAAGTCACCTAA	0.0142715	0.0115609	0.0212411	0.0130201	0.0065923	0.0327315	0.0205327	0.0309466	0.633073	0.0792651	0.0288593	0.00334258	0.0185162
FCA_GND8103049_AAAGCAAGTCATGCAT	0.00403133	0.00239364	0.00194618	0.00383691	0.00107044	0.0437516	0.00490444	0.0630813	0.499422	0.042597	0.00472118	0.00166728	0.00279794
FCA_GND8103049_AAAGCAAGTCTAGAGG	0.00978049	0.0107622	0.00547803	0.0145013	0.00277131	0.0708202	0.0070647	0.0208012	0.578592	0.0158713	0.00340505	0.00218897	0.00712845
FCA_GND8103049_AAAGCAAGTCTCAACA	0.023123	0.00442024	0.00345953	0.00802737	0.00193764	0.00973144	0.00589573	0.0242187	0.844179	0.0332746	0.00235154	0.00168636	0.00183419
FCA_GND8103049_AAAGCAAGTTTCGCTC	0.00851151	0.00628199	0.00248579	0.0108756	0.00171605	0.0287329	0.0122181	0.0109831	0.587573	0.00501556	0.00205823	0.00217355	0.00432238
FCA_GND8103049_AAAGCAATCTGGTATG	0.00129962	0.000905862	0.00231193	0.00227841	0.000990265	0.018043	0.00216602	0.0115466	0.810364	0.0125036	0.00102372	0.0017239	0.00168271
FCA_GND8103049_AAAGTAGAGAAGGTTT	0.00359819	0.00314547	0.00154814	0.00355194	0.000930298	0.0180903	0.00215517	0.00276258	0.00647595	0.00215773	0.00310682	0.00343814	0.7286
FCA_GND8103049_AAAGTAGAGGGAGTAA	0.00457257	0.00629651	0.0024178	0.00530441	0.000851633	0.00765366	0.00367532	0.0187558	0.747424	0.0331649	0.00281583	0.00180218	0.00224197
FCA_GND8103049_AAAGTAGAGTGTTAGA	0.0124491	0.00591734	0.00281024	0.00479626	0.00154397	0.00883101	0.00336682	0.0338182	0.850003	0.0398665	0.00145632	0.00198993	0.00201131
FCA_GND8103049_AAAGTAGGTCTCTTTA	0.039234	0.0334959	0.0197377	0.0170456	0.597984	0.0801383	0.109167	0.0111565	0.0255748	0.00654824	0.00543559	0.00648074	0.0188087
FCA_GND8103049_AAAGTAGTCGCCCTTA	0.0197267	0.0219736	0.00743134	0.0260325	0.00297102	0.072475	0.0155963	0.00981557	0.0384537	0.0066251	0.00638497	0.0036591	0.582066
FCA_GND8103049_AAATGCCAGCTGATAA	0.422551	0.0425934	0.017197	0.143563	0.00405741	0.0961444	0.171811	0.00643137	0.0211845	0.0044442	0.00451882	0.00451039	0.00657133
FCA_GND8103049_AAATGCCAGTACGACG	0.0130282	0.0191145	0.00419738	0.0144459	0.00145061	0.0261388	0.00565256	0.0593364	0.64515	0.0160285	0.00497474	0.00247642	0.0048715
FCA_GND8103049_AAATGCCCAGGCTCAC	0.0246798	0.0342564	0.0213912	0.0182783	0.317705	0.220777	0.225911	0.0118139	0.0304391	0.00668034	0.00551619	0.00577407	0.0200907
FCA_GND8103049_AAATGCCGTAAAGTCA	0.0175204	0.00507138	0.00580036	0.0044098	0.00238846	0.0185064	0.00875593	0.0304825	0.744005	0.00880273	0.0171126	0.00174692	0.0035766
FCA_GND8103049_AAATGCCGTCAGAATA	0.00839385	0.0115767	0.00952876	0.013833	0.0046182	0.048196	0.00874614	0.0135916	0.101062	0.0109707	0.00590999	0.0029392	0.0104598
FCA_GND8103049_AAATGCCGTGTTGGGA	0.0104332	0.012251	0.00348567	0.00959146	0.000991843	0.011577	0.00637207	0.0148237	0.826865	0.0147356	0.00224877	0.0013002	0.00211954
FCA_GND8103049_AAATGCCTCAGCTGGC	0.0034417	0.00453055	0.00231091	0.00691326	0.00139001	0.0160761	0.00364863	0.00225191	0.00569506	0.00339001	0.00234119	0.00161337	0.0672341
FCA_GND8103049_AACACGTCAAAGGCGT	0.015273	0.0056481	0.00338158	0.014536	0.00278049	0.0194754	0.00396489	0.00960245	0.552453	0.0190095	0.00264726	0.00297398	0.00213416
FCA_GND8103049_AACACGTCACCAGCAC	0.0893161	0.0654797	0.022444	0.034729	0.268812	0.244405	0.091317	0.020152	0.0511824	0.0120582	0.00660699	0.00688409	0.0172838
FCA_GND8103049_AACACGTCATGATCCA	0.043254	0.158335	0.0259703	0.0295752	0.259674	0.12407	0.171843	0.02123	0.0575104	0.0132306	0.00852754	0.00678464	0.0109726
FCA_GND8103049_AACACGTGTGAGGCTA	0.0244485	0.0131033	0.0151873	0.0253502	0.00717857	0.0467406	0.0273922	0.0371379	0.219532	0.115924	0.246004	0.0077917	0.00876198
FCA_GND8103049_AACACGTTCAGTCCCT	0.0131781	0.00777538	0.00191289	0.0293677	0.00143325	0.00657124	0.00554898	0.00489597	0.00710092	0.00547299	0.00435422	0.00277764	0.877365
FCA_GND8103049_AACCATGAGCCACCTG	0.0111455	0.0193828	0.00720529	0.0123476	0.00373161	0.0301628	0.0107127	0.0269411	0.463755	0.0792249	0.0036212	0.00290591	0.0147209
FCA_GND8103049_AACCATGAGGCGATAC	0.00281514	0.00154088	0.00177578	0.0044203	0.00123209	0.00275202	0.000788585	0.0010745	0.00276295	0.000920296	0.00161744	0.00203785	0.504243
FCA_GND8103049_AACCATGAGGCGCTCT	0.00827204	0.00519546	0.00639463	0.00844082	0.00365404	0.0140717	0.0073646	0.0481608	0.699895	0.0538844	0.00444737	0.00212443	0.00566338
FCA_GND8103049_AACCATGCAGACAAAT	0.052181	0.0255425	0.0122341	0.0972814	0.00654856	0.0514623	0.0616387	0.0121585	0.0203315	0.0119562	0.0112984	0.00570015	0.442155
FCA_GND8103049_AACCATGGTCCAAGTT	0.0338758	0.0334016	0.0203007	0.0445948	0.490425	0.14019	0.101543	0.00928458	0.0309061	0.0105782	0.00664813	0.00650548	0.0263331
FCA_GND8103049_AACCATGGTCTAGTCA	0.0267581	0.0265949	0.0103168	0.0330622	0.0024379	0.158178	0.0387104	0.0127757	0.151712	0.0164365	0.00996268	0.00322801	0.00655006
FCA_GND8103049_AACCATGGTTAAAGAC	0.00272907	0.00187308	0.00219471	0.00257533	0.000838875	0.00377717	0.00107066	0.0117442	0.887176	0.0153376	0.00450399	0.0010254	0.000697352
FCA_GND8103049_AACCATGTCACTGGGC	0.0167354	0.00702663	0.00463575	0.00561985	0.000956594	0.0184974	0.00452604	0.0391941	0.689236	0.0266211	0.00196021	0.00189284	0.00562641
FCA_GND8103049_AACCGCGCAAACGCGA	0.0110908	0.00383842	0.00334771	0.00847206	0.00129492	0.00438129	0.00304008	0.00287316	0.00962523	0.0037054	0.00177836	0.00270349	0.931564
FCA_GND8103049_AACCGCGCACGAAACG	0.00646706	0.00886579	0.00499343	0.0112676	0.00140263	0.0237992	0.00674473	0.0133414	0.260217	0.0102675	0.00450676	0.00183165	0.00384115
FCA_GND8103049_AACCGCGCATCGATGT	0.019739	0.0146426	0.0180909	0.0173606	0.00736392	0.0389561	0.0308991	0.0533065	0.390829	0.0520262	0.213233	0.00675114	0.016964
FCA_GND8103049_AACCGCGGTACCTACA	0.0183901	0.0103165	0.006698	0.0121325	0.00400578	0.503791	0.0065423	0.00312689	0.00892201	0.0016588	0.00161499	0.00208608	0.0309761
FCA_GND8103049_AACCGCGGTCGAATCT	0.0104789	0.0133921	0.00345653	0.014814	0.0017611	0.00801954	0.00344878	0.0264455	0.59343	0.0186316	0.0049384	0.00208953	0.00156183
FCA_GND8103049_AACCGCGTCCGGCACA	0.0230185	0.0117406	0.0153405	0.0188609	0.00717502	0.0318029	0.0159323	0.13844	0.389774	0.08618	0.020844	0.00725274	0.0206946
FCA_GND8103049_AACCGCGTCTAGAGTC	0.0794131	0.00844832	0.00514599	0.0211781	0.00471569	0.0123893	0.00889554	0.00363307	0.011266	0.00580619	0.00385174	0.00473157	0.795897
FCA_GND8103049_AACGTTGAGTGTGGCA	0.670364	0.0174198	0.0113594	0.116613	0.00477401	0.0272398	0.0823164	0.0032223	0.0113167	0.00248203	0.00328881	0.00418042	0.00575875
FCA_GND8103049_AACGTTGCAGTGAGTG	0.0663984	0.0375827	0.0311075	0.0279156	0.282492	0.104929	0.185755	0.0194799	0.0487089	0.0154065	0.0106173	0.00737479	0.0280524
FCA_GND8103049_AACGTTGGTACATCCA	0.03813	0.0436918	0.0314776	0.0252266	0.287221	0.0994254	0.30831	0.0170466	0.030763	0.0146934	0.0139646	0.00635496	0.0230773
FCA_GND8103049_AACGTTGGTAGTAGTA	0.00415578	0.00340342	0.00276531	0.00559037	0.00122507	0.00999932	0.00480968	0.0329306	0.62508	0.025761	0.00748024	0.00132457	0.00203829
FCA_GND8103049_AACGTTGGTGACGGTA	0.00356294	0.00127604	0.00185649	0.00281639	0.000834677	0.00530927	0.00364476	0.013573	0.915003	0.0235274	0.00150478	0.00258961	0.00178115
FCA_GND8103049_AACGTTGGTTGGAGGT	0.0313229	0.0147941	0.0113	0.0254514	0.00537519	0.0244136	0.0239846	0.194019	0.503493	0.0147099	0.0119609	0.00586426	0.00967228
FCA_GND8103049_AACGTTGTCTGCTGTC	0.0464483	0.0116404	0.00515862	0.0117125	0.00210931	0.00756186	0.00667439	0.0044303	0.0160627	0.00715675	0.00531986	0.00414951	0.818876
FCA_GND8103049_AACGTTGTCTGTCCGT	0.0233602	0.0141091	0.0157095	0.0175139	0.00514379	0.0387236	0.0114131	0.0238876	0.12496	0.158924	0.0457506	0.00407914	0.018552
FCA_GND8103049_AACTCAGCACCAACCG	0.0732692	0.0564968	0.0273181	0.0213049	0.294651	0.214081	0.0996642	0.0201713	0.0667462	0.0178554	0.0123368	0.00781848	0.016923
FCA_GND8103049_AACTCAGCACGAAATA	0.158985	0.029081	0.0192098	0.0293294	0.0141291	0.219455	0.364107	0.00905255	0.0645674	0.00623905	0.00874062	0.0102734	0.0170326
FCA_GND8103049_AACTCAGCACTTCTGC	0.0122386	0.00580504	0.00669069	0.0063675	0.00517639	0.0204515	0.0053895	0.0265081	0.0848499	0.0866042	0.00602121	0.00426601	0.133195
FCA_GND8103049_AACTCAGGTCAGAATA	0.0195401	0.00720852	0.00286091	0.019041	0.00267885	0.00735553	0.00439571	0.0034236	0.00723628	0.00320388	0.00233184	0.00255712	0.88457
FCA_GND8103049_AACTCAGGTCCAAGTT	0.0137958	0.00777564	0.00583443	0.00637386	0.00104914	0.0176989	0.00807571	0.11519	0.753944	0.0433581	0.00242706	0.00149101	0.00330147
FCA_GND8103049_AACTCAGGTCGAGATG	0.0218921	0.00838284	0.00176341	0.0161264	0.00143635	0.00662644	0.00459495	0.00470081	0.0109283	0.00495857	0.00257247	0.00388269	0.878563
FCA_GND8103049_AACTCAGGTCTTTCAT	0.00825017	0.00816054	0.00584724	0.00904074	0.00208494	0.0405723	0.00431076	0.0212294	0.229251	0.00676497	0.00454638	0.00160729	0.00947332
FCA_GND8103049_AACTCAGTCATGCTCC	0.00852698	0.00738273	0.00284114	0.00653124	0.00125028	0.0180456	0.0100597	0.0432156	0.758143	0.0237016	0.0220192	0.00181904	0.00322847
FCA_GND8103049_AACTCAGTCCAGAAGG	0.0101904	0.00997741	0.00320239	0.0099479	0.00174446	0.0173719	0.00548115	0.0179187	0.274414	0.032292	0.00684738	0.00225448	0.00169738
FCA_GND8103049_AACTCAGTCGTAGATC	0.166198	0.0212773	0.034307	0.0102619	0.00922345	0.0357808	0.0143472	0.163974	0.394015	0.0279595	0.00749349	0.00616454	0.0293059
FCA_GND8103049_AACTCAGTCTTTCCTC	0.00628914	0.0066646	0.00375749	0.00617834	0.00156989	0.0150003	0.00635759	0.0156887	0.71303	0.036724	0.00774943	0.00249567	0.0014916
FCA_GND8103049_AACTCCCAGGATGCGT	0.0159262	0.00830577	0.0123061	0.0107112	0.00471589	0.0227507	0.01282	0.0560289	0.529446	0.145127	0.0109607	0.00374317	0.00904869
FCA_GND8103049_AACTCCCCAGGTCCAC	0.0141041	0.00821674	0.00930117	0.00695109	0.00107007	0.0278258	0.00645972	0.0197699	0.843074	0.0233292	0.0027592	0.00188471	0.00163128
FCA_GND8103049_AACTCCCTCAGATAAG	0.00422704	0.00614118	0.00368075	0.00643032	0.00145297	0.0127611	0.00542279	0.0146574	0.510141	0.0219121	0.00190122	0.00183635	0.00209871
FCA_GND8103049_AACTCCCTCCAGAGGA	0.038076	0.0274838	0.028144	0.0216158	0.581035	0.107713	0.0783129	0.0119284	0.0295342	0.00954518	0.00682661	0.0062971	0.020832
FCA_GND8103049_AACTCCCTCTTCCTTC	0.0128602	0.0097631	0.00787749	0.0206668	0.00339978	0.0885338	0.00613198	0.0501916	0.515159	0.0287882	0.00269744	0.00232856	0.0067751
FCA_GND8103049_AACTCTTAGCCACTAT	0.00792319	0.0147181	0.00424113	0.0110675	0.0013107	0.0237086	0.00665642	0.0322189	0.703844	0.0129322	0.00288694	0.00183498	0.00267356
FCA_GND8103049_AACTCTTAGCTGTTCA	0.017144	0.0342527	0.0142841	0.0115651	0.00469508	0.0637782	0.0117505	0.0169056	0.0812689	0.0374235	0.0119512	0.00576801	0.613388
FCA_GND8103049_AACTCTTCAACTGGCC	0.00259038	0.00395236	0.00177975	0.00483599	0.000826383	0.00780752	0.00567037	0.0213475	0.888214	0.0140752	0.00753441	0.00170573	0.00254642
FCA_GND8103049_AACTCTTCACAGCGTC	0.140364	0.100124	0.0162042	0.602382	0.00293418	0.0120651	0.0534003	0.00430037	0.0118639	0.00512055	0.00330662	0.00527722	0.00884458
FCA_GND8103049_AACTCTTGTCAAACTC	0.0240416	0.0517111	0.0186727	0.0426007	0.00973317	0.123196	0.0186529	0.0454027	0.0844524	0.0449247	0.462881	0.0109874	0.0242502
FCA_GND8103049_AACTCTTGTCTAGGTT	0.126446	0.0597448	0.019163	0.0555079	0.101872	0.0948071	0.390798	0.0208464	0.0214609	0.0087264	0.00692574	0.00625736	0.028225
FCA_GND8103049_AACTCTTGTTACAGAA	0.0699215	0.0352733	0.027984	0.0280001	0.351703	0.18187	0.112516	0.0245399	0.0618229	0.0109312	0.00964243	0.00754931	0.0197896
FCA_GND8103049_AACTGGTAGAAGCCCA	0.011361	0.0103188	0.00951292	0.0129863	0.00597223	0.0231722	0.0111755	0.0979436	0.545212	0.104815	0.0132871	0.0041243	0.0186538
FCA_GND8103049_AACTGGTAGACAAAGG	0.0229224	0.0246629	0.0196497	0.0145268	0.484328	0.0552799	0.29348	0.0107252	0.0185523	0.00875759	0.00486069	0.00567679	0.0118028
FCA_GND8103049_AACTGGTAGGATTCGG	0.0705237	0.0105054	0.00621385	0.0383809	0.00586769	0.10163	0.698449	0.00352406	0.0163234	0.00251854	0.00182843	0.003099	0.00922577
FCA_GND8103049_AACTGGTAGGCTAGCA	0.00148595	0.00164786	0.00243945	0.00404635	0.00552759	0.0677101	0.00188494	0.000798271	0.00267916	0.000663293	0.00162219	0.00166089	0.00470373
FCA_GND8103049_AACTGGTCAGCTGGCT	0.0077278	0.00460479	0.00164176	0.00635753	0.00148669	0.0049522	0.00302372	0.043525	0.682114	0.0263772	0.00138527	0.00207834	0.00288513
FCA_GND8103049_AACTGGTCATCGACGC	0.00923096	0.0111625	0.0106264	0.00647565	0.8225	0.0407181	0.0346616	0.00607771	0.019389	0.00567768	0.00465628	0.00442191	0.00486334
FCA_GND8103049_AACTGGTGTCCGTCAG	0.00322705	0.00252057	0.00121179	0.00454695	0.000867244	0.00447033	0.00270973	0.00315625	0.00713779	0.00343625	0.00391479	0.0033786	0.936982
FCA_GND8103049_AACTGGTGTCGATTGT	0.00283917	0.00583645	0.00194167	0.00561499	0.000988966	0.0468716	0.00203739	0.00171421	0.00521117	0.00132677	0.001371	0.00162919	0.123902
FCA_GND8103049_AACTGGTGTGAGGGTT	0.0207747	0.0125966	0.012927	0.0149153	0.00583351	0.0190036	0.0119838	0.28761	0.408322	0.0539701	0.00912632	0.00524478	0.0166637
FCA_GND8103049_AACTGGTGTTGACGTT	0.113745	0.0321708	0.0145502	0.139262	0.0166355	0.222914	0.289671	0.00801825	0.0264281	0.00680015	0.00606785	0.00580747	0.00880412
FCA_GND8103049_AACTGGTTCACCCGAG	0.09318	0.046194	0.0551652	0.0240871	0.118538	0.0924842	0.338771	0.0265798	0.0565414	0.0231165	0.0114198	0.00891555	0.0200649
FCA_GND8103049_AACTGGTTCAGCCTAA	0.158941	0.0841076	0.0301354	0.0402679	0.199007	0.1819	0.103421	0.0236999	0.0548105	0.019398	0.00980118	0.00892815	0.0156109
FCA_GND8103049_AACTGGTTCATATCGG	0.452879	0.0535215	0.0215707	0.0837843	0.00535065	0.0843494	0.114535	0.00876241	0.0260089	0.00643637	0.00646481	0.00622827	0.0104368
FCA_GND8103049_AACTGGTTCCAGTAGT	0.0136754	0.00574562	0.0097143	0.0081479	0.00234366	0.0199145	0.00791983	0.091041	0.723877	0.0689636	0.00580951	0.0024071	0.00337168
FCA_GND8103049_AACTTTCAGCAGATCG	0.0458111	0.0982961	0.0170702	0.0268948	0.273645	0.135737	0.232599	0.0173914	0.0587996	0.0082519	0.00755581	0.00697659	0.0127199
FCA_GND8103049_AACTTTCAGTATCTCG	0.000819339	0.659822	0.0027057	0.00275295	0.00110874	0.000783825	0.000820067	0.000774378	0.00130257	0.000789405	0.000971864	0.00458573	0.000808057
FCA_GND8103049_AACTTTCTCCTAGGGC	0.0125093	0.0124583	0.0163054	0.0135805	0.00374258	0.0690758	0.0189801	0.0202009	0.573264	0.0336999	0.00698741	0.00250962	0.00734753
FCA_GND8103049_AACTTTCTCGCAGGCT	0.389524	0.0353031	0.0383441	0.0212418	0.0104613	0.137969	0.0309546	0.0409	0.10122	0.019133	0.0132645	0.00546211	0.0370817
FCA_GND8103049_AAGACCTAGAAGGGTA	0.0155756	0.0149482	0.0110734	0.0249594	0.00274365	0.194827	0.017802	0.016191	0.375961	0.0563781	0.0123679	0.00293712	0.00582712
FCA_GND8103049_AAGACCTCAAGGTGTG	0.00769792	0.00634651	0.010715	0.0139378	0.00232353	0.0314844	0.010533	0.207087	0.406769	0.0697755	0.00405567	0.00305757	0.00605687
FCA_GND8103049_AAGACCTGTGTTGGGA	0.071478	0.0419118	0.0164447	0.0163335	0.0478215	0.431911	0.158052	0.014211	0.041564	0.00840073	0.0056587	0.00527591	0.0310343
FCA_GND8103049_AAGCCGCAGTCAAGGC	0.000210041	9.07579e-05	0.995349	0.000409145	0.000489209	0.000162024	0.000545569	0.000111479	0.000118012	0.000147981	0.000388719	0.000641202	0.00105877
FCA_GND8103049_AAGCCGCAGTTGTAGA	0.0148744	0.00850233	0.00660264	0.0116594	0.00157953	0.0567037	0.00733998	0.0179741	0.438959	0.0170145	0.00779303	0.00196692	0.00543321
FCA_GND8103049_AAGCCGCCAAATACAG	0.0165535	0.0104075	0.00531067	0.0214527	0.00243422	0.0322448	0.00570522	0.0264589	0.582619	0.0287071	0.00277611	0.00262857	0.0057414
FCA_GND8103049_AAGCCGCCAACTGCGC	0.179658	0.0201024	0.011692	0.0421852	0.0118478	0.0148774	0.616042	0.00501103	0.0211301	0.00297529	0.0033569	0.00810943	0.0070364
FCA_GND8103049_AAGCCGCCAATCGAAA	0.0751575	0.0601042	0.0192293	0.0242467	0.264801	0.278203	0.0951326	0.0169651	0.046126	0.00975202	0.00607852	0.00733859	0.0204073
FCA_GND8103049_AAGCCGCGTCTAGTGT	0.0093652	0.00587067	0.00390828	0.00623073	0.00166741	0.120699	0.00537041	0.0314444	0.333515	0.0170733	0.0019797	0.00235277	0.00758307
FCA_GND8103049_AAGCCGCGTTATTCTC	0.00197167	0.00303608	0.00111068	0.0104959	0.000558465	0.0126239	0.962472	0.000558331	0.000807514	0.000471998	0.000802744	0.00112159	0.0014168
FCA_GND8103049_AAGCCGCTCTAACTGG	0.0335312	0.039822	0.0264481	0.0263973	0.00645395	0.0674927	0.018481	0.0327092	0.319063	0.0445485	0.00925184	0.00452738	0.0160686
FCA_GND8103049_AAGGAGCAGCTAAACA	0.00597511	0.00435229	0.00592119	0.00730313	0.00305105	0.01807	0.0142125	0.0978439	0.431493	0.0309249	0.00313878	0.00304573	0.00672582
FCA_GND8103049_AAGGAGCAGCTGAAAT	0.00958666	0.0123732	0.00823504	0.0112453	0.00306749	0.0202062	0.00676039	0.0259036	0.503184	0.121939	0.00532964	0.00248525	0.00419712
FCA_GND8103049_AAGGAGCAGTAGTGCG	0.0139768	0.00682676	0.00688542	0.0074393	0.00137092	0.019522	0.0170036	0.170273	0.704801	0.0314341	0.00289589	0.00238322	0.00227166
FCA_GND8103049_AAGGAGCCAATGACCT	0.0371787	0.0463688	0.0278493	0.0150741	0.439797	0.0995085	0.193106	0.0157572	0.0447984	0.0107238	0.00929992	0.00883599	0.0134295
FCA_GND8103049_AAGGAGCCACAGCGTC	0.00315373	0.00796047	0.00318357	0.00632782	0.000840219	0.0607092	0.00190531	0.00285388	0.0149233	0.00125776	0.00184061	0.00198419	0.00725586
FCA_GND8103049_AAGGAGCCAGTCAGAG	0.000636414	0.00214823	0.0060227	0.00430301	0.000924325	0.000427287	0.000957956	0.000571175	0.00125245	0.000779941	0.000945955	0.000919777	0.000950418
FCA_GND8103049_AAGGAGCGTCTGATCA	0.0324002	0.0522732	0.0167623	0.0338686	0.328589	0.170548	0.253824	0.00865423	0.0270077	0.00995017	0.00546636	0.00564807	0.00846161
FCA_GND8103049_AAGGAGCTCAACGAAA	0.0367	0.0141234	0.0087404	0.018885	0.00312615	0.192147	0.0569178	0.0123694	0.410369	0.00650462	0.00457094	0.00600116	0.0126288
FCA_GND8103049_AAGGAGCTCATGGTCA	0.00452494	0.0032536	0.00429437	0.0064942	0.00137896	0.0683026	0.00803827	0.0791533	0.744574	0.0232167	0.00884996	0.00189225	0.00232779
FCA_GND8103049_AAGGCAGAGACCGGAT	0.00195564	0.00129862	0.000482801	0.00248594	0.000216281	0.00128926	0.000684994	0.000539432	0.000988598	0.000874541	0.000752653	0.00122429	0.984
FCA_GND8103049_AAGGCAGAGAGAGCTC	0.0373265	0.05623	0.0262376	0.023919	0.596515	0.070702	0.0795355	0.0116259	0.0318956	0.00880781	0.00600987	0.0067051	0.0130168
FCA_GND8103049_AAGGCAGAGCACCGTC	0.0035633	0.00407739	0.00789288	0.00707844	0.00227648	0.0219167	0.00753418	0.0130848	0.259817	0.0194714	0.00712183	0.00179255	0.00238559
FCA_GND8103049_AAGGCAGAGGATGGAA	0.0102207	0.00413521	0.0080607	0.00903134	0.00368473	0.0129432	0.00448028	0.0321639	0.596141	0.157886	0.0196907	0.00299782	0.00625862
FCA_GND8103049_AAGGCAGAGTCCGTAT	0.0488669	0.0109221	0.0153938	0.00911472	0.00311124	0.0147158	0.0179628	0.109261	0.661928	0.0447298	0.00446763	0.00313586	0.00707979
FCA_GND8103049_AAGGCAGGTAGCTGCC	0.00825876	0.00348613	0.00101341	0.0121457	0.0006299	0.00332805	0.00206011	0.0013814	0.00199317	0.00123627	0.00142686	0.00157809	0.945852
FCA_GND8103049_AAGGCAGGTTGGTAAA	0.726616	0.0188239	0.00703332	0.0177638	0.00328458	0.051284	0.0257242	0.0112304	0.0293571	0.00250623	0.00481762	0.00406536	0.0104611
FCA_GND8103049_AAGGCAGGTTTGCATG	0.00487642	0.0100256	0.00401254	0.00839788	0.00146461	0.0112554	0.00442594	0.0505161	0.765886	0.0474169	0.00441078	0.00359545	0.0030769
FCA_GND8103049_AAGGTTCAGAGAGCTC	0.00127324	0.00163726	0.00249644	0.00217975	0.000526804	0.00268119	0.00113298	0.0135486	0.947487	0.00881479	0.0009648	0.00096962	0.000480548
FCA_GND8103049_AAGGTTCAGTGACTCT	0.00400056	0.00563857	0.00601999	0.00515248	0.00213524	0.0175933	0.00428135	0.0360678	0.211486	0.0228115	0.0157867	0.00167117	0.0029761
FCA_GND8103049_AAGGTTCCAATCGAAA	0.0281287	0.0349597	0.0143794	0.0228999	0.43929	0.157662	0.176062	0.0170825	0.0294186	0.00924619	0.00609159	0.00588158	0.0130349
FCA_GND8103049_AAGGTTCCATGCCACG	0.0131537	0.0111513	0.00428141	0.0124796	0.00124015	0.0231168	0.00740685	0.0163661	0.810175	0.0306822	0.00497519	0.00272022	0.00475828
FCA_GND8103049_AAGGTTCGTCCGAATT	0.0634894	0.0268319	0.0277099	0.0369686	0.00361543	0.1795	0.051524	0.0348757	0.400569	0.01359	0.00495083	0.00497664	0.0160257
FCA_GND8103049_AAGGTTCGTTTAGGAA	0.0393425	0.0269468	0.0206625	0.0151498	0.47449	0.152253	0.141957	0.0169302	0.0342833	0.00897564	0.00745396	0.00750283	0.015323
FCA_GND8103049_AAGGTTCTCAGGATCT	0.0139325	0.00277796	0.00155645	0.00648398	0.000889925	0.0203132	0.00356519	0.00393191	0.0133531	0.00365337	0.00291396	0.00394148	0.80102
FCA_GND8103049_AAGGTTCTCCAGTATG	0.0114053	0.0158787	0.0168554	0.0134667	0.49023	0.0456831	0.259053	0.0241992	0.0357518	0.0134616	0.00880938	0.00642108	0.0183309
FCA_GND8103049_AAGGTTCTCGCAAGCC	0.00334911	0.00484072	0.00360944	0.0059189	0.00118603	0.0135211	0.00769268	0.0505114	0.630134	0.00665203	0.00899415	0.00132901	0.00393158
FCA_GND8103049_AAGTCTGAGGTAGCTG	0.0626009	0.00909287	0.00445523	0.0261238	0.00262296	0.0114365	0.00766509	0.00453228	0.0102363	0.00410457	0.00461399	0.00195371	0.801133
FCA_GND8103049_AAGTCTGCACGAGGTA	0.27897	0.0296715	0.0138187	0.06324	0.00937145	0.0563424	0.46507	0.00649714	0.0158021	0.00447068	0.00409286	0.00536437	0.00714073
FCA_GND8103049_AAGTCTGCAGAGTGTG	0.0668191	0.116961	0.0151799	0.0419139	0.212018	0.219229	0.175084	0.020851	0.0561529	0.00848359	0.00765143	0.00640499	0.0106351
FCA_GND8103049_AAGTCTGCATGCTGGC	0.00198476	0.00191916	0.0013374	0.00304777	0.00103418	0.015494	0.00255939	0.00168261	0.0286815	0.00110863	0.00368519	0.00109713	0.00558028
FCA_GND8103049_AAGTCTGGTACTTAGC	0.0794805	0.0126438	0.0383583	0.0134477	0.010239	0.0903614	0.0265402	0.0230863	0.499282	0.0112016	0.00551414	0.00385006	0.00711395
FCA_GND8103049_AAGTCTGGTTGAGGTG	0.0628819	0.0443539	0.0299084	0.0292259	0.219973	0.244917	0.179731	0.0193193	0.0524221	0.0129581	0.00746529	0.00698587	0.0308306
FCA_GND8103049_AAGTCTGTCAACACCA	0.010396	0.013786	0.0109949	0.0102027	0.00274209	0.0144689	0.00782013	0.0342386	0.709108	0.0349482	0.0105798	0.00349766	0.00435891
FCA_GND8103049_AAGTCTGTCCGCGGTA	0.00398215	0.00254887	0.00110539	0.00464038	0.000827506	0.00542976	0.00127514	0.00156732	0.00275765	0.0018595	0.00115957	0.00178563	0.960432
FCA_GND8103049_AAGTCTGTCTGCAAGT	0.00542823	0.00497733	0.00133679	0.00408209	0.000418948	0.00503797	0.00210142	0.0149063	0.889172	0.00709061	0.00082087	0.00134471	0.0037
FCA_GND8103049_AATCCAGAGAATGTGT	0.0320392	0.0185731	0.0157919	0.0674074	0.00372475	0.160327	0.0228441	0.0127399	0.388553	0.0153788	0.0138796	0.00306676	0.00434634
FCA_GND8103049_AATCCAGAGCAGCCTC	0.0497832	0.0231161	0.0182586	0.0317231	0.00348973	0.105382	0.0212016	0.0238688	0.507536	0.0436509	0.00464802	0.00267407	0.00534292
FCA_GND8103049_AATCCAGCAAGAAAGG	0.0186626	0.0263062	0.0222577	0.0143585	0.421456	0.237946	0.045273	0.0165465	0.095726	0.0103694	0.00662007	0.00659144	0.0194551
FCA_GND8103049_AATCCAGTCCTAAGTG	0.0143135	0.0159022	0.0183564	0.00898515	0.0104676	0.0495041	0.012809	0.00987197	0.0760551	0.0183163	0.0253262	0.00844804	0.660084
FCA_GND8103049_AATCGGTAGCCAGTTT	0.0101775	0.00543357	0.0102126	0.00573285	0.00343353	0.0103412	0.0051752	0.133287	0.562165	0.214582	0.00424459	0.00255708	0.00447009
FCA_GND8103049_AATCGGTAGGAATTAC	0.0108954	0.00633687	0.00967692	0.00805135	0.00339999	0.00907074	0.00714151	0.0404255	0.767948	0.0741242	0.00354321	0.00249482	0.00421168
FCA_GND8103049_AATCGGTCAATCGGTT	0.011723	0.00323304	0.00425009	0.00799248	0.00120765	0.0158794	0.0243802	0.103677	0.75072	0.0261008	0.00329857	0.00417051	0.00401587
FCA_GND8103049_AATCGGTCACATCCAA	0.00932232	0.0041182	0.0016321	0.00481318	0.000598468	0.00314339	0.00207379	0.00202961	0.0027125	0.00222181	0.00113793	0.00116081	0.953206
FCA_GND8103049_AATCGGTGTACGCTGC	0.00120816	0.00158686	0.00132892	0.000925484	0.000401534	0.00204119	0.000948691	0.000505554	0.00111421	0.000923005	0.000554709	0.00130733	0.983224
FCA_GND8103049_AATCGGTTCATCGATG	0.0204218	0.0306209	0.0182906	0.0242274	0.477771	0.125481	0.168016	0.0105273	0.0244637	0.00882697	0.00562355	0.00537292	0.0135418
FCA_GND8103049_AATCGGTTCGTTGACA	0.00573373	0.00555267	0.00425715	0.00754004	0.00190721	0.0474875	0.00788049	0.0135207	0.171083	0.0488576	0.00578108	0.00197687	0.00505405
FCA_GND8103049_ACACCAAAGAAGGTTT	0.00357274	0.00478223	0.00634714	0.00494777	0.00183239	0.0421484	0.00390602	0.00925284	0.144211	0.0124768	0.0092255	0.00276196	0.0222279
FCA_GND8103049_ACACCAATCCATTCTA	0.00716665	0.00485078	0.00423182	0.00764207	0.00168918	0.00848663	0.00354431	0.0393192	0.725805	0.107245	0.00716347	0.00220611	0.00240903
FCA_GND8103049_ACACCAATCGCCATAA	0.00950492	0.00344357	0.00397205	0.00679707	0.000967553	0.00977448	0.00162248	0.0023586	0.0130562	0.00465013	0.00203397	0.00172452	0.928757
FCA_GND8103049_ACACCAATCGTCTGAA	0.0130127	0.0138784	0.0112608	0.00871599	0.00286791	0.0503757	0.0126545	0.104011	0.546002	0.157626	0.0109965	0.00341528	0.00938258
FCA_GND8103049_ACACCAATCGTTGCCT	0.0108025	0.0133369	0.0104107	0.0124962	0.773991	0.0700778	0.0451025	0.00572148	0.0146051	0.00485392	0.00303754	0.00485682	0.00862512
FCA_GND8103049_ACACCAATCTTATCTG	0.0460152	0.0520028	0.0435317	0.0397534	0.411486	0.0886266	0.151791	0.0144697	0.0313119	0.0203104	0.0111838	0.00879769	0.0227693
FCA_GND8103049_ACACCCTCAATAGAGT	0.0254652	0.0244641	0.0299194	0.0165087	0.465068	0.117359	0.194472	0.0129014	0.0336158	0.0104097	0.0100096	0.00715202	0.0196151
FCA_GND8103049_ACACCCTCAGCTCGAC	0.00291127	0.00324222	0.00463711	0.00559501	0.0015372	0.0205987	0.0129461	0.0734797	0.687896	0.014264	0.00875514	0.00225007	0.0019606
FCA_GND8103049_ACACCCTGTAAGGATT	0.0742038	0.0463859	0.0227533	0.0269604	0.270326	0.248078	0.0776407	0.0178534	0.0860131	0.0157226	0.00734322	0.00735069	0.0163217
FCA_GND8103049_ACACCCTGTATTCTCT	0.0636563	0.0438177	0.0240697	0.0200887	0.381532	0.157965	0.0682028	0.0186887	0.0832576	0.0188488	0.0068404	0.00685209	0.0127099
FCA_GND8103049_ACACCCTGTCCAACTA	0.00728035	0.00334036	0.00414629	0.0136357	0.00128807	0.039383	0.00855472	0.00468982	0.637194	0.00684402	0.00488078	0.00206574	0.00222348
FCA_GND8103049_ACACCCTTCACAGGCC	0.136295	0.052266	0.0245746	0.0249572	0.0108194	0.511041	0.104589	0.00517221	0.0513388	0.00462278	0.00372875	0.00637047	0.0129947
FCA_GND8103049_ACACCCTTCGTTTATC	0.0265134	0.029837	0.0331447	0.0142305	0.480105	0.162033	0.0839944	0.0128938	0.0535593	0.00835254	0.00840474	0.0083121	0.0334228
FCA_GND8103049_ACACCGGAGAGGACGG	0.00999275	0.0124345	0.0106959	0.0169586	0.00256205	0.0624367	0.0119553	0.00868884	0.0497492	0.00557326	0.00454007	0.00188241	0.0156843
FCA_GND8103049_ACACCGGAGTATTGGA	0.140158	0.0609551	0.0405427	0.0294258	0.260001	0.142885	0.147587	0.0180101	0.0395523	0.0160687	0.00850592	0.00823526	0.0178838
FCA_GND8103049_ACACCGGCAAGCCATT	0.0171657	0.00622253	0.00486897	0.0167027	0.00258075	0.0808801	0.0122243	0.00270822	0.0132855	0.0017304	0.0023381	0.00187608	0.020614
FCA_GND8103049_ACACCGGCATGCAACT	0.00391648	0.0034279	0.00190211	0.00729144	0.00146898	0.0126974	0.00347797	0.0193273	0.768559	0.0494279	0.00260118	0.00142322	0.00140636
FCA_GND8103049_ACACCGGCATGTAAGA	0.000151433	0.000149425	0.989124	0.00058739	0.000676523	0.000295236	0.000714756	0.000154071	0.000186434	0.000183841	0.000436449	0.00110531	0.00559777
FCA_GND8103049_ACACCGGGTTCTCATT	0.0284536	0.00798712	0.00388471	0.064828	0.00119813	0.0300622	0.82723	0.0025367	0.00547262	0.0019736	0.00142556	0.00213472	0.00292565
FCA_GND8103049_ACACCGGTCAGCGACC	0.0295108	0.0123398	0.00684264	0.0161949	0.00210335	0.00826604	0.00345613	0.00801227	0.0152046	0.0136462	0.00427743	0.00292561	0.82781
FCA_GND8103049_ACACCGGTCCAACCAA	0.0197302	0.00967196	0.00893456	0.0143904	0.00247062	0.0579988	0.0095203	0.0100392	0.719441	0.0151251	0.00213768	0.00314309	0.00416825
FCA_GND8103049_ACACCGGTCCTTGGTC	0.0178767	0.023079	0.0150311	0.0165856	0.678605	0.0345471	0.134728	0.0129937	0.016223	0.00690929	0.00556002	0.00499371	0.00894305
FCA_GND8103049_ACACCGGTCTCATTCA	0.0070628	0.00334805	0.00436669	0.00327692	0.00102505	0.00661082	0.00318797	0.0522217	0.847634	0.0449731	0.00142761	0.0015853	0.00207868
FCA_GND8103049_ACACTGAAGAAGCCCA	0.00792722	0.0045493	0.00706157	0.00709416	0.00383136	0.125095	0.00912719	0.0387079	0.302283	0.042769	0.0031917	0.00206649	0.00784242
FCA_GND8103049_ACACTGAAGTCCAGGA	0.00292139	0.00276184	0.00236342	0.00541117	0.000706823	0.0138941	0.00341354	0.00764893	0.380971	0.0413842	0.0094401	0.00140283	0.00341154
FCA_GND8103049_ACACTGACAAGTTAAG	0.00438823	0.0058151	0.00380371	0.00433675	0.00153077	0.00392624	0.00336779	0.0914344	0.828335	0.00931782	0.00155242	0.00171695	0.00257442
FCA_GND8103049_ACACTGACACATCCGG	0.0653801	0.052147	0.0279628	0.0339125	0.361349	0.207998	0.0894969	0.015113	0.0531131	0.0124363	0.00611672	0.00684247	0.0177655
FCA_GND8103049_ACACTGAGTAAGGATT	0.00542248	0.00529069	0.00300946	0.00759368	0.000733179	0.0134893	0.00375033	0.0118645	0.876969	0.0202395	0.00159613	0.00164799	0.0010655
FCA_GND8103049_ACACTGAGTACCTACA	0.0490095	0.0819359	0.0173955	0.0244417	0.444059	0.133346	0.0714227	0.0224432	0.0483393	0.00821754	0.0065464	0.00641629	0.0140921
FCA_GND8103049_ACACTGAGTCCAGTTA	0.00411904	0.00379126	0.00349548	0.00767462	0.00106515	0.006904	0.0037996	0.0673042	0.579361	0.0144199	0.00252939	0.00137509	0.0022358
FCA_GND8103049_ACACTGAGTTAAGGGC	0.00778979	0.00797226	0.00561064	0.0137508	0.0491144	0.0680276	0.023266	0.00707398	0.0223233	0.00790561	0.00697613	0.00298131	0.0497027
FCA_GND8103049_ACACTGAGTTGGTGGA	0.00591161	0.0040785	0.00359371	0.00793982	0.00251396	0.0473011	0.00986212	0.0141939	0.3796	0.00940798	0.00110691	0.00212309	0.0036822
FCA_GND8103049_ACACTGATCAAACCGT	0.0129499	0.00853806	0.00202181	0.00999658	0.00147731	0.00808502	0.00649	0.0068743	0.00708654	0.00681561	0.00400349	0.00271285	0.901457
FCA_GND8103049_ACAGCCGAGTGGACGT	0.0248334	0.00886314	0.00567825	0.00676589	0.00143379	0.0127062	0.00535435	0.125626	0.728447	0.0346156	0.00214212	0.00218264	0.00503151
FCA_GND8103049_ACAGCCGCACATGACT	0.00392708	0.00227763	0.000997328	0.00322361	0.000417655	0.00212214	0.00107594	0.0011387	0.00243703	0.00181893	0.00133763	0.00306732	0.968733
FCA_GND8103049_ACAGCCGCAGATCCAT	0.0379761	0.033657	0.0171013	0.0170627	0.637636	0.0726821	0.0804902	0.0101064	0.0240577	0.0109086	0.00544135	0.0108706	0.0119956
FCA_GND8103049_ACAGCCGGTAGCGATG	0.0518594	0.00930245	0.00418129	0.0160151	0.00183546	0.0531031	0.836043	0.0016143	0.00680663	0.00123063	0.00131276	0.00175138	0.00225286
FCA_GND8103049_ACAGCCGTCAGCTCGG	0.0270472	0.0180574	0.00485581	0.0207411	0.00172005	0.0492233	0.0240703	0.00521821	0.0175363	0.00548318	0.00617153	0.00418336	0.7638
FCA_GND8103049_ACAGCCGTCCACGAAT	0.00840454	0.0154957	0.00364365	0.00936397	0.0015328	0.00654395	0.00345875	0.0274633	0.826557	0.014174	0.00290351	0.00172926	0.00193003
FCA_GND8103049_ACAGCCGTCCCACTTG	0.170639	0.0802988	0.025827	0.0331535	0.00974175	0.0981144	0.0237766	0.0576091	0.257009	0.0489874	0.0357861	0.00870205	0.0254273
FCA_GND8103049_ACAGCCGTCCTCAATT	0.0100851	0.00844465	0.00487067	0.0104633	0.00171757	0.0199724	0.00508499	0.070694	0.380062	0.0194236	0.0202825	0.00209787	0.00415537
FCA_GND8103049_ACAGCTAAGATTACCC	0.00429982	0.00295555	0.00216923	0.00482059	0.000916245	0.034903	0.00704319	0.0115187	0.731596	0.0845061	0.00317186	0.0018982	0.0030185
FCA_GND8103049_ACAGCTAAGGTGCTAG	0.00460537	0.00596878	0.00367067	0.0104878	0.0264904	0.0221909	0.0151824	0.00795534	0.00972378	0.00448598	0.0031748	0.00298205	0.0449259
FCA_GND8103049_ACAGCTAAGGTGTGGT	0.30749	0.0483964	0.0219096	0.172105	0.00411936	0.0843229	0.269067	0.00604382	0.0216344	0.0043705	0.00415528	0.00409651	0.00665316
FCA_GND8103049_ACAGCTACAAGTAATG	0.00958351	0.007478	0.00493109	0.0084819	0.00206327	0.135151	0.0113683	0.00545566	0.0201985	0.00362277	0.00819611	0.00360053	0.0979443
FCA_GND8103049_ACAGCTACACAAGCCC	0.00938383	0.0083106	0.00636772	0.0120263	0.00164849	0.0660186	0.0233876	0.0164279	0.497408	0.0161876	0.00534258	0.00184299	0.00824708
FCA_GND8103049_ACAGCTACACGAAACG	0.00698873	0.00622832	0.00587908	0.0168334	0.00189273	0.00873048	0.00627979	0.0140727	0.452937	0.0314092	0.00527711	0.00187362	0.00258901
FCA_GND8103049_ACAGCTAGTATTCGTG	0.0425217	0.0392576	0.0289754	0.0264122	0.104342	0.320303	0.06108	0.0187563	0.115189	0.0117718	0.00769292	0.00711105	0.0164905
FCA_GND8103049_ACAGCTAGTATTCTCT	0.025807	0.0281907	0.0216815	0.0125291	0.576842	0.112206	0.048739	0.0136782	0.0356973	0.00964563	0.00599749	0.00654361	0.0298989
FCA_GND8103049_ACAGCTATCAACACTG	0.0122831	0.0127364	0.0123033	0.0144607	0.00461648	0.02647	0.00984591	0.0472968	0.282097	0.19804	0.0420238	0.00421497	0.00985915
FCA_GND8103049_ACAGCTATCAGAGACG	0.0276628	0.0238317	0.0113056	0.0253969	0.0041891	0.0500455	0.0122837	0.0370942	0.328347	0.183024	0.0415218	0.00670096	0.0108349
FCA_GND8103049_ACAGCTATCGTGGGAA	0.0169488	0.00628329	0.00386023	0.0148755	0.00554891	0.316837	0.02676	0.00198615	0.00567585	0.00152058	0.00192714	0.00221375	0.0201586
FCA_GND8103049_ACATACGCAAGTTCTG	0.00291833	0.00479879	0.00394437	0.00688724	0.00103799	0.0101934	0.00290692	0.0144294	0.384317	0.0716364	0.0201588	0.00169726	0.00174155
FCA_GND8103049_ACATACGCAATCCGAT	0.0417953	0.0198791	0.00735808	0.0296766	0.00332121	0.0228406	0.0306422	0.00740304	0.013082	0.00787344	0.011128	0.00442067	0.56871
FCA_GND8103049_ACATACGCACCACGTG	0.0316564	0.0277029	0.0362472	0.0142229	0.546021	0.128411	0.068304	0.0119013	0.026259	0.014012	0.00786919	0.00607876	0.0221779
FCA_GND8103049_ACATACGCAGAAGCAC	0.0107769	0.00582454	0.00365119	0.00746755	0.00196965	0.266312	0.00577083	0.0044301	0.0681611	0.00265209	0.00317674	0.00248543	0.0351026
FCA_GND8103049_ACATACGCATCCCATC	0.0455879	0.0343554	0.0164927	0.0307332	0.00570402	0.225437	0.0198601	0.0263806	0.126781	0.058528	0.0319964	0.00668405	0.0239432
FCA_GND8103049_ACATACGGTCTGATCA	0.047431	0.0395895	0.0523046	0.0262042	0.242025	0.138561	0.191063	0.0245243	0.106991	0.0167099	0.0155872	0.00985459	0.0269591
FCA_GND8103049_ACATACGTCGTCTGAA	0.0356425	0.0277956	0.0156042	0.0260353	0.0056098	0.0682208	0.0171542	0.0848157	0.263965	0.132288	0.0472699	0.00564095	0.0127589
FCA_GND8103049_ACATACGTCTGATTCT	0.205542	0.065032	0.0220809	0.0345332	0.0608559	0.201631	0.263946	0.0137108	0.0569123	0.0156705	0.00501974	0.00575546	0.0113825
FCA_GND8103049_ACATCAGAGTAACCCT	0.0405817	0.0120335	0.00996054	0.0736171	0.00176676	0.0128877	0.809319	0.0024334	0.00553503	0.00204417	0.00315797	0.00223562	0.00352311
FCA_GND8103049_ACATCAGAGTTAGGTA	0.0076714	0.0115488	0.00343795	0.0181475	0.00168811	0.00850499	0.00489193	0.0149612	0.418319	0.0299029	0.00554748	0.00213872	0.00221245
FCA_GND8103049_ACATCAGCAACGATCT	0.0213156	0.0165539	0.00742226	0.0210637	0.00144486	0.042214	0.0110621	0.0143813	0.279406	0.0161146	0.00421149	0.0024803	0.00497433
FCA_GND8103049_ACATCAGCAGCAGTTT	0.0576315	0.00363521	0.00978187	0.0113723	0.00403492	0.0208361	0.0136088	0.055465	0.746446	0.0109126	0.00600183	0.00274906	0.010148
FCA_GND8103049_ACATCAGCATGGAATA	0.0100553	0.0254054	0.00624861	0.019166	0.00174687	0.0185546	0.00783461	0.0280853	0.656833	0.0660038	0.0045384	0.00197846	0.00336138
FCA_GND8103049_ACATCAGCATGGGAAC	0.00486202	0.00573598	0.00946974	0.00477232	0.00571193	0.0466461	0.0143455	0.0241068	0.668859	0.155759	0.00635239	0.00402509	0.0073362
FCA_GND8103049_ACATCAGCATGTTCCC	0.0521723	0.0220331	0.0150104	0.0166118	0.00457574	0.115515	0.0194476	0.106778	0.480596	0.0162183	0.00567171	0.00349836	0.0247926
FCA_GND8103049_ACATCAGGTCTTGCGG	0.0392323	0.0561165	0.0285122	0.0185329	0.241039	0.310686	0.0569248	0.017699	0.0702606	0.0122027	0.00704499	0.00626865	0.019046
FCA_GND8103049_ACATGGTAGATGTCGG	0.0486008	0.0429665	0.0147618	0.0404532	0.477671	0.104338	0.156359	0.0131791	0.0290105	0.00993471	0.00628173	0.0072859	0.00834907
FCA_GND8103049_ACATGGTAGCAGGTCA	0.00678164	0.00367356	0.00211807	0.0058929	0.00108949	0.0761411	0.00566476	0.00780769	0.0956788	0.00275099	0.00416396	0.00126687	0.00527245
FCA_GND8103049_ACATGGTAGCCGATTT	0.0384592	0.0251291	0.0225173	0.0190346	0.310868	0.217833	0.110991	0.01756	0.0834006	0.0127474	0.00906637	0.00758816	0.0268978
FCA_GND8103049_ACATGGTAGCCTATGT	0.125267	0.0423688	0.0252154	0.0799275	0.0128137	0.15823	0.13481	0.0177991	0.183391	0.0183234	0.0119314	0.0120651	0.0224296
FCA_GND8103049_ACATGGTAGCTAGTCT	0.12096	0.0117941	0.00393173	0.0834115	0.00172186	0.016196	0.70746	0.00346368	0.00461902	0.00172161	0.00298584	0.00231178	0.0021114
FCA_GND8103049_ACATGGTAGGGTGTTG	0.00538269	0.00465365	0.00354418	0.0167555	0.00269215	0.0196173	0.00444054	0.0170752	0.123048	0.0297107	0.00436948	0.00185424	0.00521803
FCA_GND8103049_ACATGGTAGTGGGTTG	0.00127255	0.00122845	0.000359198	0.00236599	0.000239757	0.000985353	0.000857534	0.000717193	0.000737818	0.000627575	0.000615391	0.00104941	0.985828
FCA_GND8103049_ACATGGTCACATCTTT	0.00285398	0.00280819	0.00283874	0.00352781	0.00131689	0.00783624	0.00229043	0.00799147	0.335596	0.00832132	0.0070838	0.00153239	0.00189867
FCA_GND8103049_ACATGGTGTCTGGAGA	0.0146926	0.00965399	0.0103087	0.0134044	0.0025816	0.0544926	0.0100846	0.0153566	0.392839	0.046976	0.0279005	0.00229652	0.00451699
FCA_GND8103049_ACATGGTGTTTGTGTG	0.0085948	0.00676602	0.00704122	0.00879522	0.00226558	0.0190762	0.0120201	0.13765	0.361101	0.278545	0.0189699	0.00297351	0.00505406
FCA_GND8103049_ACATGGTTCAAACCGT	0.0337018	0.0438533	0.00945276	0.0178324	0.00295895	0.062249	0.0168907	0.0232202	0.358308	0.0437565	0.00415452	0.00576567	0.00660411
FCA_GND8103049_ACCAGTAAGAAGCCCA	0.0195505	0.00670671	0.00397362	0.0294806	0.00187447	0.0262224	0.879011	0.00196467	0.00617595	0.00212994	0.00201108	0.00198058	0.00360897
FCA_GND8103049_ACCAGTAAGTACCGGA	0.0265012	0.0532572	0.0223403	0.0400793	0.590562	0.0433284	0.0964228	0.0193304	0.0276551	0.0105357	0.00797649	0.00632881	0.0124384
FCA_GND8103049_ACCAGTAAGTCGCCGT	0.0428927	0.0219604	0.00900217	0.037291	0.00518877	0.370121	0.0250539	0.00941734	0.0217563	0.00356938	0.0023768	0.00428047	0.0926284
FCA_GND8103049_ACCAGTAAGTTGAGTA	0.0106659	0.00805311	0.00978742	0.0104458	0.00313365	0.0272003	0.0125017	0.0611261	0.418528	0.0696079	0.121329	0.00393395	0.0118327
FCA_GND8103049_ACCAGTACATCCTTGC	0.0211957	0.0103178	0.0096759	0.0367737	0.00441485	0.120494	0.0587162	0.00671901	0.0411897	0.00749495	0.00903795	0.00325133	0.143299
FCA_GND8103049_ACCAGTAGTAAGAGGA	0.00892995	0.00335381	0.00298138	0.00951974	0.00167375	0.00908035	0.00272794	0.00552972	0.0219386	0.00776502	0.0173578	0.00254937	0.849658
FCA_GND8103049_ACCAGTATCGAGCCCA	0.0450057	0.0502349	0.0170827	0.0300867	0.226878	0.340749	0.0765069	0.0198578	0.0583416	0.0110283	0.00561488	0.00731641	0.0249477
FCA_GND8103049_ACCAGTATCGTCGTTC	0.0161154	0.017423	0.00528199	0.093658	0.00138686	0.0462831	0.789366	0.00186817	0.00508599	0.00182877	0.00202964	0.00202241	0.00171551
FCA_GND8103049_ACCCACTAGAAACCTA	0.0781849	0.0936813	0.0262778	0.0215366	0.214125	0.283986	0.143234	0.0147336	0.0472518	0.00774353	0.00634554	0.00696862	0.0148512
FCA_GND8103049_ACCCACTAGGCAGTCA	0.0570369	0.0145632	0.0112275	0.0428063	0.0042894	0.0290977	0.0116363	0.00619863	0.0119829	0.00749881	0.00587018	0.00392031	0.716505
FCA_GND8103049_ACCCACTAGTAACCCT	0.01037	0.00352042	0.00279856	0.0100763	0.00211081	0.00543173	0.00192094	0.00378544	0.0103449	0.00517938	0.00302566	0.00336254	0.914464
FCA_GND8103049_ACCCACTAGTGCCATT	0.0180549	0.00503703	0.00284568	0.0258685	0.00138052	0.00697838	0.00628225	0.00338106	0.00655987	0.00364018	0.00292296	0.00274511	0.862931
FCA_GND8103049_ACCCACTGTAACGCGA	0.101769	0.0654912	0.0230876	0.0220381	0.102615	0.436748	0.104209	0.0165822	0.0446574	0.0138758	0.00528696	0.00565644	0.0120663
FCA_GND8103049_ACCCACTTCAGCTGGC	0.00141309	0.00455958	0.00585368	0.00469188	0.0045455	0.0014906	0.00337738	0.00179845	0.00516521	0.00219181	0.00427658	0.00244264	0.00239613
FCA_GND8103049_ACCCACTTCTTTAGTC	0.0100396	0.00730119	0.00335147	0.0103231	0.00179055	0.026588	0.0126886	0.0100286	0.209897	0.012475	0.0480648	0.00307273	0.00520228
FCA_GND8103049_ACCGTAAAGAGCAATT	0.0597046	0.0286342	0.0148074	0.0114295	0.0048504	0.00848173	0.00766327	0.0796096	0.647519	0.0515534	0.00588007	0.00296243	0.00578207
FCA_GND8103049_ACCGTAAAGAGGTAGA	0.018134	0.0239748	0.0216495	0.0228364	0.101145	0.493236	0.0588035	0.0121736	0.0578709	0.011868	0.00841229	0.0057354	0.0489768
FCA_GND8103049_ACCGTAAAGCCACGCT	0.00601311	0.00544443	0.00387962	0.00499515	0.00210418	0.0586597	0.00525067	0.00875217	0.0815778	0.00909798	0.00357586	0.00152886	0.00291503
FCA_GND8103049_ACCGTAAAGGTGTTAA	0.0266445	0.0084786	0.00817198	0.0125655	0.00264873	0.011653	0.00839634	0.0470762	0.706587	0.0720273	0.00393009	0.003447	0.00673241
FCA_GND8103049_ACCGTAAAGTCAAGCG	0.0301285	0.0260981	0.0306434	0.0342276	0.211236	0.128134	0.360294	0.0124717	0.0311959	0.00844036	0.00725979	0.00495995	0.0206992
FCA_GND8103049_ACCGTAAAGTGGAGAA	0.0182207	0.00454485	0.00347616	0.0175291	0.00188849	0.00616053	0.00361181	0.00327983	0.00623976	0.00387163	0.0028991	0.00330531	0.889166
FCA_GND8103049_ACCGTAACACCAGTTA	0.254385	0.069645	0.0172001	0.206286	0.0109294	0.034485	0.324474	0.00879582	0.0129608	0.00403152	0.00497702	0.00508463	0.00671511
FCA_GND8103049_ACCGTAAGTACAGTGG	0.0457548	0.00642079	0.0104324	0.00665573	0.00196129	0.0120209	0.00405783	0.0539614	0.785472	0.0243948	0.00153966	0.00225607	0.00500744
FCA_GND8103049_ACCGTAAGTGCTTCTC	0.0125933	0.0194695	0.0107332	0.0158124	0.00406062	0.0202977	0.0117018	0.0278155	0.202976	0.394719	0.0473611	0.00517026	0.00457999
FCA_GND8103049_ACCGTAATCCTTAATC	0.031273	0.0336846	0.019526	0.017813	0.442115	0.0965789	0.178775	0.0119789	0.0607851	0.0087949	0.00479663	0.0087852	0.0122817
FCA_GND8103049_ACCTTTAAGACTCGGA	0.00965256	0.0135179	0.0135812	0.0127322	0.00673192	0.0202805	0.0111899	0.00952583	0.0366745	0.754013	0.0147875	0.0043028	0.00704547
FCA_GND8103049_ACCTTTACACGCATCG	0.0185871	0.00767854	0.00658721	0.00669077	0.00152796	0.0276514	0.0100773	0.00841234	0.630959	0.00907151	0.004123	0.00277375	0.00296324
FCA_GND8103049_ACCTTTACAGTTAACC	0.0936288	0.0529818	0.0299844	0.0328772	0.224059	0.262473	0.147331	0.0133185	0.0588018	0.0129358	0.00545216	0.00773421	0.0131093
FCA_GND8103049_ACCTTTAGTACCGAGA	0.0119809	0.01018	0.00767403	0.011209	0.00317475	0.0322643	0.00822373	0.0539567	0.717885	0.0102998	0.00317897	0.00171919	0.00606224
FCA_GND8103049_ACCTTTATCATGTCCC	0.0138328	0.0141758	0.0107694	0.0317927	0.00957738	0.0126318	0.00932045	0.398042	0.29542	0.0385272	0.0118251	0.00441647	0.00647911
FCA_GND8103049_ACGAGCCAGCCATCGC	0.000160691	0.000156379	0.994278	0.000537983	0.000459592	0.000185845	0.000517254	0.000123848	0.000167053	0.000182705	0.000438577	0.000954211	0.00134801
FCA_GND8103049_ACGAGCCAGCGTAATA	0.00323206	0.0027535	0.00233295	0.00311979	0.000926571	0.00265563	0.00184639	0.0332777	0.876841	0.0239576	0.00798932	0.00139641	0.00177273
FCA_GND8103049_ACGAGCCAGGTAAACT	0.00906299	0.0099311	0.0021409	0.0130958	0.00228355	0.0225685	0.00472892	0.00670764	0.0463963	0.0101691	0.00623256	0.00269566	0.0198491
FCA_GND8103049_ACGAGCCAGTCTCAAC	0.0867702	0.0231987	0.0173126	0.0334744	0.00662703	0.335011	0.0632427	0.033971	0.158225	0.0334169	0.0263571	0.00632643	0.0144779
FCA_GND8103049_ACGAGCCCACGTCAGC	0.0136971	0.00665529	0.00176695	0.00971159	0.00063816	0.00603551	0.00311412	0.00279561	0.00550408	0.00257367	0.00239664	0.00152926	0.929934
FCA_GND8103049_ACGAGCCCAGGGATTG	0.034393	0.0171076	0.0050309	0.0162089	0.00226153	0.0510471	0.00856904	0.0128855	0.0316223	0.0101181	0.00485717	0.00243674	0.0199657
FCA_GND8103049_ACGAGCCGTCTCTTTA	0.0979846	0.0640057	0.0262328	0.0354571	0.317419	0.15758	0.107817	0.0160293	0.0534232	0.0173298	0.00792384	0.00849681	0.0156222
FCA_GND8103049_ACGAGCCTCCTACAGA	0.00769547	0.00633711	0.00614683	0.00808539	0.00158475	0.0544831	0.00516255	0.010091	0.101509	0.0145584	0.0176823	0.00144474	0.00804129
FCA_GND8103049_ACGAGCCTCTGAGGGA	0.0206095	0.00450493	0.00998317	0.00666118	0.00518534	0.0360245	0.00466563	0.010017	0.262109	0.00711054	0.00554279	0.00149305	0.00854246
FCA_GND8103049_ACGAGCCTCTGGAGCC	0.00739065	0.00691901	0.00460221	0.0080309	0.00364831	0.709061	0.0728032	0.00391622	0.010933	0.00261365	0.00344402	0.00378015	0.0115299
FCA_GND8103049_ACGAGGAAGACGACGT	0.0122838	0.00796214	0.00235466	0.00865751	0.00121308	0.0136444	0.0058116	0.0279804	0.720079	0.0177269	0.00453873	0.00158875	0.00143311
FCA_GND8103049_ACGAGGAAGCGTGAGT	0.080698	0.0772836	0.0253067	0.0289405	0.320813	0.231779	0.0901224	0.0136275	0.0467338	0.0121816	0.00648325	0.00788142	0.00982579
FCA_GND8103049_ACGAGGAAGGATATAC	0.0151931	0.00809974	0.00785551	0.0141244	0.00267118	0.0181502	0.00462241	0.0186797	0.187602	0.0143769	0.00973438	0.00247408	0.0186966
FCA_GND8103049_ACGAGGATCAACACTG	0.00130105	0.000867593	0.00126604	0.0036431	0.000615404	0.00266849	0.0018192	0.0250869	0.829135	0.00536928	0.00652683	0.000997109	0.000392995
FCA_GND8103049_ACGATACAGAGTACAT	0.0012779	0.00278078	0.00556359	0.00801525	0.00040717	0.00449444	0.00490565	0.0201187	0.932652	0.00576655	0.0034991	0.000950001	0.00072645
FCA_GND8103049_ACGATACCAACTTGAC	0.0529642	0.025919	0.0104034	0.0196295	0.00247689	0.382142	0.0166791	0.0175205	0.205544	0.0102428	0.0154386	0.00300739	0.0211432
FCA_GND8103049_ACGATACCAAGGACTG	0.0107617	0.00410883	0.0064666	0.00716791	0.00152749	0.0112063	0.00491161	0.0110603	0.540401	0.0305154	0.00460347	0.0017948	0.00367799
FCA_GND8103049_ACGATACCAAGTACCT	0.00989439	0.0055473	0.00527691	0.00929012	0.00166146	0.015496	0.00834092	0.0332672	0.842734	0.0146579	0.00246223	0.00196581	0.00346934
FCA_GND8103049_ACGATACCACTGTCGG	0.0110026	0.00916818	0.00408872	0.00995787	0.00154707	0.0069894	0.00353575	0.0336563	0.768586	0.0279698	0.00290147	0.00196026	0.00317182
FCA_GND8103049_ACGATACCAGATAATG	0.0105574	0.00603826	0.00831305	0.01521	0.0028379	0.0149901	0.0121398	0.145842	0.653663	0.0292715	0.00684667	0.00256388	0.00546037
FCA_GND8103049_ACGATACCATCGTCGG	0.0490697	0.0232805	0.0214624	0.0240273	0.00533499	0.0218687	0.015468	0.286274	0.40886	0.0503335	0.00570141	0.00480603	0.0135491
FCA_GND8103049_ACGATACGTAGCCTAT	0.0908403	0.0446344	0.0164693	0.114022	0.007182	0.0523239	0.0255719	0.0235668	0.122934	0.0123292	0.020199	0.00708235	0.0368871
FCA_GND8103049_ACGATACGTCTTGATG	0.0273963	0.0230817	0.00553761	0.0216622	0.00262062	0.0332112	0.0089802	0.0123997	0.103745	0.012354	0.00951551	0.00254945	0.00667456
FCA_GND8103049_ACGATACGTCTTGTCC	0.0427638	0.0261149	0.0215936	0.036148	0.215117	0.0812192	0.457602	0.0113039	0.018859	0.00896775	0.00563805	0.00595054	0.0246652
FCA_GND8103049_ACGATACGTTTGACAC	0.328732	0.0328564	0.0164271	0.0417261	0.0127339	0.142073	0.283578	0.00848031	0.0396536	0.00665847	0.00551186	0.00722731	0.010126
FCA_GND8103049_ACGATACTCACAGGCC	0.011743	0.0064958	0.0071908	0.00866083	0.00387135	0.0152354	0.00833149	0.0295726	0.138926	0.0412656	0.0135979	0.00303834	0.0289118
FCA_GND8103049_ACGATGTAGATCTGCT	0.0207957	0.00957273	0.00622695	0.0229516	0.00330736	0.0116868	0.00531689	0.0150156	0.0307734	0.0282762	0.0124492	0.00318399	0.713435
FCA_GND8103049_ACGATGTAGCTGGAAC	0.0379028	0.0196498	0.0166527	0.0341065	0.00781781	0.0520175	0.0402642	0.147485	0.385806	0.0850041	0.0334347	0.00699292	0.0262643
FCA_GND8103049_ACGATGTAGGATCGCA	0.0169418	0.00839459	0.00604808	0.019496	0.00295421	0.0717755	0.00674255	0.0148104	0.308692	0.0209478	0.00850767	0.00304908	0.00562513
FCA_GND8103049_ACGATGTCAGCGTTCG	0.0179648	0.00869761	0.0135323	0.0323913	0.00338563	0.0108914	0.00961366	0.00757267	0.028181	0.0125171	0.00848965	0.00260797	0.789059
FCA_GND8103049_ACGATGTCAGGTTTCA	0.0229966	0.028891	0.0102215	0.0239317	0.664873	0.081426	0.0691548	0.0128762	0.0218305	0.00709643	0.00524479	0.00518248	0.006541
FCA_GND8103049_ACGATGTGTAACGCGA	0.0046431	0.00459118	0.00352241	0.00803037	0.00158257	0.00468371	0.00223296	0.038723	0.654597	0.0439257	0.00301806	0.00156162	0.00213212
FCA_GND8103049_ACGATGTGTATAGGGC	0.00467205	0.00479594	0.00544791	0.00682506	0.00217367	0.00666525	0.00413064	0.028185	0.111181	0.75136	0.00864721	0.00341787	0.0020875
FCA_GND8103049_ACGATGTGTGTAATGA	0.00378069	0.00531648	0.00285885	0.00551834	0.000637056	0.00597689	0.00252176	0.032303	0.866987	0.0164423	0.00204152	0.00177031	0.00174443
FCA_GND8103049_ACGATGTGTTCAACCA	0.005492	0.00257074	0.00138005	0.0166247	0.000607418	0.0164553	0.00465736	0.00155044	0.00482753	0.0025976	0.00215631	0.00177357	0.922201
FCA_GND8103049_ACGCAGCAGAAGGTGA	0.00856186	0.00714475	0.00689417	0.00905395	0.0029976	0.0111254	0.00591645	0.0108089	0.114658	0.0757636	0.00969494	0.00300959	0.00626948
FCA_GND8103049_ACGCAGCAGCATGGCA	0.0387713	0.0425718	0.0181297	0.0268307	0.424843	0.118277	0.146457	0.0153272	0.0506456	0.0105957	0.00572	0.00971376	0.0192685
FCA_GND8103049_ACGCAGCAGTTAACGA	0.0440249	0.055459	0.0199475	0.027968	0.45447	0.15654	0.139398	0.0114833	0.0294119	0.00749222	0.00568537	0.00579298	0.00891565
FCA_GND8103049_ACGCAGCAGTTACCCA	0.142681	0.0680798	0.0119389	0.118577	0.00298139	0.465049	0.0478628	0.00544109	0.0377777	0.0048139	0.00435529	0.00454137	0.0061787
FCA_GND8103049_ACGCAGCCATGAGCGA	0.212107	0.0239677	0.0241184	0.0359503	0.00854593	0.204881	0.032578	0.040411	0.205973	0.0174818	0.0106416	0.00611044	0.0160005
FCA_GND8103049_ACGCAGCGTGAAGGCT	0.0263428	0.0378604	0.0241213	0.0122743	0.065234	0.499548	0.0921927	0.0274724	0.0901173	0.0199593	0.00996757	0.00531961	0.0104275
FCA_GND8103049_ACGCAGCTCAACGGCC	0.0787641	0.0318731	0.0248396	0.0574008	0.182637	0.124788	0.364248	0.00949267	0.0324897	0.00837318	0.00498585	0.0065701	0.0293877
FCA_GND8103049_ACGCAGCTCCACGAAT	0.0206571	0.0317976	0.0112217	0.0189591	0.00304997	0.0286132	0.00788969	0.0227917	0.201711	0.145143	0.0218501	0.00655661	0.00595875
FCA_GND8103049_ACGCAGCTCCAGGGCT	0.0489287	0.0307188	0.0147255	0.0454453	0.00610049	0.0726189	0.0452103	0.0123703	0.427039	0.00946395	0.00481338	0.00495309	0.0144725
FCA_GND8103049_ACGCAGCTCCGTACAA	0.00459672	0.00153569	0.00258592	0.0033047	0.00176041	0.0040425	0.00183515	0.0223879	0.880463	0.00885456	0.00173825	0.00135775	0.0012327
FCA_GND8103049_ACGCCAGAGGGCACTA	0.0467703	0.0442135	0.0140151	0.0553327	0.355043	0.0893383	0.261152	0.0127735	0.0223078	0.00811994	0.00721548	0.00668318	0.0245412
FCA_GND8103049_ACGCCAGCAATGGAGC	0.0230124	0.0280258	0.0151807	0.0306664	0.0048464	0.0621028	0.0135566	0.0305878	0.253901	0.0976131	0.0742127	0.00711213	0.0205374
FCA_GND8103049_ACGCCAGGTCCGACGT	0.00766437	0.0060569	0.00784816	0.00771676	0.00310013	0.0400875	0.0110828	0.0309339	0.34955	0.046358	0.0486031	0.00285729	0.00694076
FCA_GND8103049_ACGCCAGGTTCTGTTT	0.0453798	0.0281712	0.0344629	0.0167306	0.466707	0.104416	0.115308	0.0160664	0.0566612	0.0168107	0.00788403	0.00830327	0.0191015
FCA_GND8103049_ACGCCAGTCACCACCT	0.109577	0.0830469	0.0424908	0.0278977	0.157508	0.161794	0.0996969	0.019237	0.0831082	0.0122086	0.0105606	0.0083401	0.0180028
FCA_GND8103049_ACGCCAGTCGAGCCCA	0.0974672	0.0345391	0.0548166	0.0198487	0.0542729	0.385968	0.0576401	0.0139845	0.135536	0.0100636	0.00674443	0.00607718	0.0144811
FCA_GND8103049_ACGCCAGTCTCTAGGA	0.0463188	0.0103107	0.0036234	0.0434001	0.00094389	0.0114024	0.863442	0.00243626	0.00336803	0.00139018	0.00128873	0.00200532	0.00161061
FCA_GND8103049_ACGCCGAAGTTCGCGC	0.0196293	0.0336641	0.0264274	0.0177151	0.481266	0.0823463	0.221754	0.0125731	0.0271807	0.0119435	0.00756743	0.00703272	0.0126241
FCA_GND8103049_ACGCCGACAAGCCCAC	0.0295887	0.0188691	0.0140736	0.0151908	0.003408	0.0654518	0.0189252	0.179614	0.47584	0.127522	0.00581511	0.00423634	0.0117619
FCA_GND8103049_ACGCCGACAAGTAGTA	0.00135418	0.00173818	0.00219563	0.00175121	0.00199234	0.858109	0.0468959	0.00145231	0.00610807	0.00129653	0.00193777	0.00248311	0.00399489
FCA_GND8103049_ACGCCGACACCAGGCT	0.0101734	0.00477345	0.00865239	0.0073066	0.00263326	0.0202755	0.0127383	0.0162183	0.818197	0.015418	0.00225224	0.00267787	0.00221003
FCA_GND8103049_ACGCCGAGTGATGTGG	0.0283767	0.0191268	0.0205949	0.0167283	0.488202	0.0788538	0.23766	0.00972108	0.0226729	0.0078315	0.00649391	0.0059463	0.013388
FCA_GND8103049_ACGCCGATCCTTAATC	0.0649818	0.0949266	0.0409057	0.0431074	0.232769	0.180994	0.156454	0.0123485	0.0619537	0.0125361	0.00867163	0.00885846	0.0198416
FCA_GND8103049_ACGCCGATCGACGGAA	0.019099	0.0212494	0.0132261	0.0250237	0.00754712	0.0317352	0.0166397	0.0625746	0.396852	0.189996	0.0287292	0.00766911	0.0115164
FCA_GND8103049_ACGCCGATCGGAGCAA	0.023912	0.0130608	0.00511796	0.0522507	0.00302358	0.00949978	0.0101121	0.0109353	0.0183501	0.0106726	0.021047	0.00335706	0.76342
FCA_GND8103049_ACGGAGACAAAGAATC	0.0387639	0.0152268	0.00670307	0.0137627	0.0122362	0.0185731	0.0205926	0.00905311	0.0142908	0.00787697	0.00485627	0.00340347	0.786287
FCA_GND8103049_ACGGAGACAACCGCCA	0.0179131	0.0212744	0.0170077	0.012382	0.708732	0.0505291	0.0947751	0.00801597	0.0227545	0.00526879	0.00440002	0.00670797	0.00653172
FCA_GND8103049_ACGGAGACAAGCGTAG	0.0800014	0.0247613	0.0220742	0.0828495	0.0188604	0.0524183	0.0793555	0.0470278	0.306527	0.0259274	0.0171372	0.00577365	0.021305
FCA_GND8103049_ACGGAGACATTGGTAC	0.00357167	0.00307639	0.00485953	0.00303128	0.00165074	0.00454993	0.00204534	0.0147819	0.653232	0.0243137	0.000867347	0.0014128	0.00419566
FCA_GND8103049_ACGGAGAGTTACGCGC	0.0813105	0.0390731	0.028922	0.0463945	0.170175	0.297874	0.0996532	0.0155491	0.0732858	0.0101823	0.00641246	0.00666931	0.027499
FCA_GND8103049_ACGGAGATCCAGAAGG	0.011435	0.0108545	0.00900182	0.0117208	0.00376933	0.032356	0.021254	0.0633025	0.433673	0.207575	0.12396	0.00353543	0.00695247
FCA_GND8103049_ACGGAGATCGCGCCAA	0.00915562	0.00836685	0.00875561	0.0113888	0.00514658	0.0201182	0.00794306	0.0925449	0.396535	0.116081	0.0109969	0.00340117	0.010264
FCA_GND8103049_ACGGCCAAGGAGCGTT	0.0998796	0.0355424	0.0142784	0.0366513	0.00939906	0.129365	0.0263479	0.0142316	0.309412	0.0118741	0.00649975	0.00653874	0.024832
FCA_GND8103049_ACGGCCAAGTGTTGAA	0.00959526	0.00724195	0.00661759	0.0129817	0.00251889	0.0178408	0.00841513	0.0168303	0.316802	0.0712928	0.00933114	0.0034462	0.00452834
FCA_GND8103049_ACGGCCACAAGCGCTC	0.0182901	0.00477205	0.00750345	0.0112155	0.00170217	0.0172161	0.0392607	0.0460038	0.686402	0.0305514	0.00401319	0.00281406	0.0040027
FCA_GND8103049_ACGGCCAGTGCCTGGT	0.632052	0.022349	0.00655338	0.0617167	0.00366943	0.0540105	0.103429	0.00513476	0.0267073	0.00328037	0.00318076	0.00443533	0.00687647
FCA_GND8103049_ACGGCCATCATTTGGG	0.00730572	0.0078278	0.00499436	0.00277669	0.00163011	0.0057356	0.00326445	0.0197607	0.849959	0.0262196	0.000970178	0.00189168	0.00327747
FCA_GND8103049_ACGGCCATCGTTTGCC	0.000621534	0.000411753	0.984264	0.00302195	0.000478297	0.000623089	0.0013582	0.000726395	0.000917379	0.000894093	0.00129988	0.000808185	0.00292538
FCA_GND8103049_ACGGGCTAGCTGGAAC	0.0346069	0.0173055	0.014832	0.0175807	0.00504414	0.0193452	0.0125312	0.0289748	0.441726	0.116923	0.0118701	0.00485329	0.00493741
FCA_GND8103049_ACGGGCTAGGCAAAGA	0.174369	0.0473865	0.0329621	0.0262975	0.0817138	0.36515	0.12224	0.0121065	0.0529817	0.0115949	0.00568905	0.0067608	0.0108793
FCA_GND8103049_ACGGGCTAGTGAACGC	0.0448578	0.0311008	0.0171845	0.0375525	0.570881	0.0822833	0.117996	0.00997667	0.0167576	0.00699138	0.00552532	0.00710808	0.0102536
FCA_GND8103049_ACGGGCTAGTGTACTC	0.0387258	0.0333837	0.0182507	0.0173933	0.597752	0.0916711	0.0767104	0.0129024	0.0221508	0.00912747	0.00561466	0.0061875	0.0130133
FCA_GND8103049_ACGGGCTCAGTAGAGC	0.0154687	0.0218605	0.0104034	0.0121776	0.678614	0.0931945	0.0891562	0.00762555	0.0186097	0.00584311	0.00459048	0.00509442	0.00770334
FCA_GND8103049_ACGGGCTGTAAAGGAG	0.0129719	0.00785171	0.00624149	0.0134192	0.00336007	0.0486225	0.0129573	0.0690233	0.652019	0.0300157	0.00829919	0.0040852	0.00619196
FCA_GND8103049_ACGGGCTGTCTTGCGG	0.0321018	0.0209568	0.0099168	0.0228214	0.00376779	0.448083	0.0361884	0.00443229	0.0142024	0.00360785	0.00415876	0.00260605	0.0325027
FCA_GND8103049_ACGGGCTGTTACGACT	0.00158432	0.00285209	0.000860303	0.00274407	0.000358521	0.01654	0.000809094	0.00130821	0.028583	0.00269552	0.000990591	0.00190459	0.00763272
FCA_GND8103049_ACGGGCTTCGCAGGCT	0.0243321	0.0194765	0.00506145	0.0379189	0.00253263	0.0411536	0.00827846	0.0159171	0.236361	0.0193608	0.00853276	0.00466092	0.0107713
FCA_GND8103049_ACGGGCTTCTTTAGGG	0.0138961	0.01632	0.0111466	0.0149232	0.00499574	0.0174459	0.0130612	0.147402	0.361556	0.310345	0.00698717	0.00381862	0.00730444
FCA_GND8103049_ACGGGTCCACTGTCGG	0.00770006	0.00463916	0.00266823	0.00438153	0.00127046	0.00741959	0.00528857	0.0134345	0.0281585	0.0185912	0.00554095	0.0040636	0.845333
FCA_GND8103049_ACGGGTCCATTCTTAC	0.0178895	0.00672719	0.00474613	0.00651409	0.00213346	0.0347877	0.00622766	0.0188275	0.27807	0.0172605	0.00501404	0.00168993	0.0152324
FCA_GND8103049_ACGGGTCGTCCAACTA	0.0880213	0.144003	0.0217603	0.0575016	0.246667	0.122754	0.108197	0.0344418	0.0560925	0.0141163	0.00866532	0.00797033	0.0132565
FCA_GND8103049_ACGGGTCGTGAAATCA	0.01023	0.00717734	0.00526668	0.00529713	0.0017915	0.00699447	0.00300948	0.00743741	0.0117319	0.00560731	0.00474866	0.00194672	0.901983
FCA_GND8103049_ACGGGTCTCCATGAAC	0.00867155	0.00665079	0.00500956	0.015663	0.00253899	0.0264126	0.0108731	0.0101216	0.0460142	0.00736968	0.00494169	0.0033531	0.495576
FCA_GND8103049_ACGGGTCTCGAATCCA	0.00787703	0.00755423	0.00654303	0.00723842	0.00264885	0.0344983	0.0106195	0.0703753	0.608317	0.118392	0.0144236	0.00333306	0.00727387
FCA_GND8103049_ACGTCAAAGTCATGCT	0.00556283	0.948626	0.00365229	0.00381807	0.000894666	0.00209164	0.00231936	0.00141417	0.00277754	0.00161669	0.00133618	0.00701859	0.00123085
FCA_GND8103049_ACGTCAACAATAGCGG	0.0250014	0.00993642	0.00602443	0.0481991	0.00349771	0.0592905	0.752464	0.00349508	0.00652669	0.00364409	0.0028546	0.00256401	0.0109311
FCA_GND8103049_ACGTCAACAGTTTACG	0.00591151	0.00508838	0.00454928	0.00812935	0.000808758	0.0148003	0.00800103	0.0127087	0.810568	0.0100286	0.00364959	0.00189691	0.00151141
FCA_GND8103049_ACGTCAAGTGCACTTA	0.152434	0.0383551	0.0088367	0.499591	0.00964557	0.0365723	0.144968	0.0120631	0.0220267	0.00660483	0.00794459	0.00762636	0.0128697
FCA_GND8103049_ACGTCAAGTTTAGGAA	0.102778	0.0385498	0.0096002	0.0250221	0.00255581	0.0452868	0.0191059	0.0226751	0.645573	0.0168624	0.00402894	0.00439016	0.00878114
FCA_GND8103049_ACGTCAATCATCATTC	0.0119675	0.00795575	0.00331467	0.0114318	0.00130709	0.017128	0.0039453	0.0105802	0.103312	0.00382616	0.00457166	0.00136753	0.00367917
FCA_GND8103049_ACGTCAATCGAATGGG	0.0645757	0.0630379	0.0162175	0.0586155	0.00557974	0.106081	0.0158848	0.00878225	0.0444407	0.00650019	0.00510087	0.00298865	0.0180595
FCA_GND8103049_ACTATCTAGTTAGCGG	0.0190142	0.0164237	0.0108816	0.0130383	0.117311	0.0916322	0.0512669	0.0173936	0.0397658	0.0114801	0.00824925	0.00592007	0.413354
FCA_GND8103049_ACTATCTCACTACAGT	0.0262291	0.0282524	0.00876294	0.0124897	0.00250445	0.0261169	0.0098944	0.0279545	0.705643	0.0895927	0.0019744	0.00550535	0.00425353
FCA_GND8103049_ACTATCTCACTTAACG	0.122679	0.00932328	0.0205546	0.150188	0.0196536	0.0327514	0.580727	0.00287539	0.00790318	0.00258674	0.00499549	0.00455692	0.00850937
FCA_GND8103049_ACTATCTCACTTCTGC	0.18097	0.360604	0.0218029	0.243498	0.00180194	0.0188084	0.0154674	0.00192788	0.00330095	0.00276334	0.00226639	0.00398093	0.00993086
FCA_GND8103049_ACTATCTCAGCCACCA	0.0335201	0.0190192	0.0143284	0.0119705	0.00449253	0.0847297	0.00784391	0.00933327	0.0428705	0.0146755	0.00947929	0.00846627	0.674768
FCA_GND8103049_ACTATCTCAGCTGTAT	0.00701397	0.0159677	0.00520921	0.00892124	0.000817184	0.0217843	0.00491223	0.0229291	0.590982	0.0276827	0.00298786	0.00251815	0.0087036
FCA_GND8103049_ACTATCTCAGGAACGT	0.0072117	0.00377142	0.00507625	0.00702161	0.00128977	0.0119522	0.00721276	0.0410713	0.802691	0.0185506	0.00243449	0.00140336	0.00279304
FCA_GND8103049_ACTGAACAGGTGACCA	0.0254291	0.00718654	0.00470956	0.00987633	0.00148916	0.0402574	0.00949368	0.019225	0.731569	0.00850253	0.00291497	0.00171144	0.00339346
FCA_GND8103049_ACTGAACCAGCAGTTT	0.171751	0.0450636	0.0184453	0.261361	0.00680867	0.0997425	0.27437	0.00809907	0.0224404	0.00591204	0.00533421	0.00622645	0.00871592
FCA_GND8103049_ACTGAACTCGGATGTT	0.00983053	0.00491009	0.00816019	0.00894659	0.00427407	0.00732717	0.00884834	0.0562007	0.512557	0.228077	0.00708959	0.00284147	0.00411163
FCA_GND8103049_ACTGAGTCACATTCGA	0.011821	0.00849185	0.00526874	0.00851241	0.00222217	0.0181596	0.0054256	0.159723	0.656769	0.0728763	0.00409515	0.00234793	0.00309013
FCA_GND8103049_ACTGAGTCACGGTAGA	0.00568375	0.00379203	0.000935373	0.00523382	0.0008483	0.00207847	0.00162601	0.00177046	0.00293624	0.00182056	0.00111512	0.00184286	0.96343
FCA_GND8103049_ACTGAGTGTATTCTCT	0.0563487	0.0232413	0.00411283	0.0528829	0.00578543	0.0183766	0.0114758	0.0183532	0.0604321	0.00736681	0.00865058	0.00449522	0.638968
FCA_GND8103049_ACTGAGTGTCATACTG	0.00051486	0.000587598	0.000421409	0.000976189	0.000390192	0.00111955	0.000704323	0.000811926	0.000594004	0.000777854	0.000783327	0.000965477	0.951604
FCA_GND8103049_ACTGAGTTCCTAAGTG	0.0118936	0.0134494	0.0160327	0.0163627	0.649332	0.106342	0.0658422	0.0100725	0.0352711	0.00680485	0.0057771	0.00602858	0.0294201
FCA_GND8103049_ACTGAGTTCTGGCGAC	0.0309375	0.0136323	0.00251582	0.0198009	0.00117967	0.00875013	0.00841852	0.00384507	0.00693294	0.00366804	0.00287306	0.00362402	0.866754
FCA_GND8103049_ACTGATGAGACTCGGA	0.0390898	0.0248357	0.0242456	0.0169817	0.285945	0.12666	0.311662	0.0182526	0.0601935	0.00765918	0.00901316	0.00658354	0.0145577
FCA_GND8103049_ACTGATGAGAGTGACC	0.00401413	0.00836135	0.00278906	0.00450675	0.00106683	0.00464312	0.00318012	0.0341459	0.773224	0.0746833	0.0184919	0.00190546	0.00110329
FCA_GND8103049_ACTGATGAGCGTGTCC	0.0174254	0.0166194	0.0185391	0.0221978	0.00468079	0.0243587	0.019953	0.0683743	0.313092	0.303385	0.00612719	0.00400982	0.00848883
FCA_GND8103049_ACTGATGCACAGCGTC	0.0287281	0.0391554	0.0185485	0.0183623	0.535858	0.175039	0.0809585	0.0100395	0.0302247	0.00750556	0.00434488	0.00664586	0.0121379
FCA_GND8103049_ACTGATGCATGGGACA	0.0350196	0.0366	0.00875294	0.0759499	0.00858282	0.569042	0.0480903	0.00332804	0.0196125	0.00401444	0.00302846	0.00559768	0.0140636
FCA_GND8103049_ACTGATGCATGTAGTC	0.16934	0.0762894	0.0239361	0.0266531	0.0848773	0.365345	0.0805792	0.0155004	0.0705109	0.0132874	0.00620178	0.00624181	0.00976429
FCA_GND8103049_ACTGATGGTGTGACCC	0.074282	0.0132562	0.0209603	0.0161625	0.00410419	0.0243843	0.0238111	0.127988	0.60852	0.0381817	0.0041726	0.00278956	0.00832043
FCA_GND8103049_ACTGATGTCCTGTACC	0.0361486	0.0419118	0.0204844	0.0166856	0.362382	0.137835	0.245219	0.0138857	0.045262	0.00825329	0.00636325	0.00774724	0.0155288
FCA_GND8103049_ACTGATGTCTCACATT	0.052338	0.0365384	0.0328331	0.0182463	0.413387	0.200803	0.0719113	0.0141412	0.0751599	0.0122768	0.00710349	0.00709698	0.0126023
FCA_GND8103049_ACTGATGTCTGCAAGT	0.00423783	0.00570532	0.00294633	0.00824205	0.00128793	0.0153112	0.00517115	0.0175012	0.783108	0.0352153	0.0170953	0.00184442	0.00223697
FCA_GND8103049_ACTGCTCAGCTAGCCC	0.013155	0.00593661	0.00738864	0.0121254	0.00299249	0.0699007	0.0108159	0.00856531	0.059824	0.00912179	0.00872089	0.00355356	0.166913
FCA_GND8103049_ACTGCTCGTCAGATAA	0.00528341	0.00574932	0.00280525	0.00666624	0.00194254	0.0118454	0.00305491	0.00443422	0.0567512	0.0185598	0.01377	0.0017237	0.00324683
FCA_GND8103049_ACTGCTCGTCTTGCGG	0.0261156	0.0247595	0.0247695	0.0251336	0.30082	0.0793549	0.349853	0.0177766	0.0486737	0.0153702	0.00862675	0.00620277	0.0180759
FCA_GND8103049_ACTGCTCGTGCATCTA	0.0148888	0.0187946	0.00978995	0.0228385	0.00482773	0.0257461	0.0099787	0.0360111	0.434232	0.163902	0.00867134	0.00404917	0.00586589
FCA_GND8103049_ACTGCTCTCATGCTCC	0.0378538	0.0239053	0.0221161	0.0141397	0.522855	0.0948224	0.160908	0.0118356	0.0281764	0.00983213	0.00678889	0.00701319	0.018033
FCA_GND8103049_ACTGCTCTCTGGTTCC	0.201405	0.0566763	0.0544329	0.0370292	0.169145	0.169015	0.0866292	0.0209719	0.077219	0.0206822	0.00813407	0.00934777	0.0185703
FCA_GND8103049_ACTGTCCAGATATACG	0.609236	0.0223828	0.00886239	0.0927481	0.00217941	0.0416326	0.163215	0.0040667	0.00889005	0.00256646	0.00260817	0.00332427	0.00407885
FCA_GND8103049_ACTGTCCCAAGCGAGT	0.016	0.0166249	0.0126521	0.0214394	0.00423071	0.0236149	0.0153056	0.0712747	0.215547	0.273703	0.0710504	0.00657359	0.00601822
FCA_GND8103049_ACTGTCCCAGATGGGT	0.0155009	0.0267659	0.00942219	0.0153633	0.00359821	0.106907	0.0149942	0.0109761	0.278851	0.00936773	0.0037601	0.00372523	0.0167225
FCA_GND8103049_ACTGTCCCAGCTGCAC	0.0101872	0.00408532	0.00308834	0.00818954	0.00159321	0.00930116	0.00342693	0.0128227	0.0274272	0.00806813	0.0054369	0.00265866	0.713499
FCA_GND8103049_ACTGTCCCAGGTCTCG	0.000160745	0.000108891	0.99399	0.00139925	0.000577345	0.000143763	0.00055879	0.000146316	0.000112789	0.000172277	0.000962526	0.000703151	0.000626813
FCA_GND8103049_ACTGTCCCAGTAAGAT	0.0414137	0.0379077	0.0183412	0.0208213	0.509918	0.136831	0.117301	0.0133217	0.0303198	0.00966805	0.00611434	0.00669006	0.0128449
FCA_GND8103049_ACTGTCCTCACAACGT	0.00397697	0.00554549	0.00332301	0.00828724	0.00216089	0.0069494	0.00331651	0.0326012	0.187072	0.0549173	0.0156507	0.00151996	0.00324537
FCA_GND8103049_ACTGTCCTCACCATAG	0.00512503	0.0101165	0.00452724	0.00622928	0.00211218	0.476127	0.00817861	0.00822427	0.0366718	0.00463223	0.0033298	0.00228732	0.0390642
FCA_GND8103049_ACTGTCCTCCAAACTG	0.00176243	0.00111602	0.000817354	0.0015142	0.000443752	0.00154686	0.000627729	0.00167012	0.00210459	0.00226858	0.00265018	0.00141173	0.978353
FCA_GND8103049_ACTGTCCTCCAAGCCG	0.0284422	0.0219708	0.0159219	0.0167509	0.407279	0.0721162	0.263603	0.0119683	0.0714575	0.00737409	0.00808174	0.0065842	0.0105157
FCA_GND8103049_ACTGTCCTCCCAAGAT	0.0509372	0.0388885	0.013657	0.0241856	0.280081	0.182265	0.125622	0.0144489	0.0464649	0.0101894	0.00740762	0.00609455	0.020957
FCA_GND8103049_ACTGTCCTCCTTTCGG	0.0260704	0.0137466	0.00490474	0.0189105	0.00286582	0.0635381	0.00741354	0.0136956	0.0268307	0.00937353	0.00703411	0.00518264	0.472822
FCA_GND8103049_ACTGTCCTCTCTTATG	0.0173288	0.00441365	0.00403005	0.00616206	0.00117587	0.00805494	0.0137131	0.0220117	0.839422	0.028461	0.00306216	0.00227587	0.00149898
FCA_GND8103049_ACTGTCCTCTGGTATG	0.0142194	0.0109338	0.00922203	0.0145821	0.00552682	0.0269815	0.014832	0.190099	0.328781	0.207217	0.0233259	0.0071558	0.00876895
FCA_GND8103049_ACTTACTAGAATTGTG	0.000184154	0.000205858	0.991754	0.000916905	0.000877432	0.000203024	0.000777961	0.000214371	0.000377612	0.000309139	0.00145052	0.00105273	0.000703236
FCA_GND8103049_ACTTACTAGTCATGCT	0.0347219	0.0224567	0.00939485	0.00949779	0.00427594	0.016223	0.00941937	0.139119	0.554723	0.106712	0.00509753	0.00595243	0.00811899
FCA_GND8103049_ACTTACTAGTGCGATG	0.0129453	0.00974039	0.0115961	0.0104731	0.00397156	0.0203307	0.010285	0.101714	0.376928	0.199122	0.124352	0.00340982	0.00940211
FCA_GND8103049_ACTTACTCACCCAGTG	0.035325	0.0151679	0.0175662	0.0197177	0.00363562	0.108924	0.013804	0.0250774	0.411358	0.0642587	0.0054061	0.00267074	0.00507599
FCA_GND8103049_ACTTACTCATCACGTA	0.00316102	0.00607325	0.00508018	0.0032551	0.00173264	0.0188632	0.00343458	0.00635024	0.191497	0.00904682	0.00432723	0.00275932	0.0107339
FCA_GND8103049_ACTTACTGTAAGGATT	0.0366822	0.0173249	0.012913	0.0359627	0.00644084	0.059015	0.0339384	0.0087934	0.0380511	0.00833157	0.00557685	0.00375239	0.0323253
FCA_GND8103049_ACTTACTGTTAAGATG	0.0298862	0.0123724	0.0101909	0.0122292	0.00221025	0.0257786	0.00699927	0.060563	0.707678	0.0779176	0.00576655	0.00297786	0.00296057
FCA_GND8103049_ACTTACTGTTAGATGA	0.00610204	0.00436281	0.00471357	0.00931029	0.00248769	0.0230606	0.0090251	0.0606574	0.423693	0.114265	0.0179329	0.00294968	0.00497279
FCA_GND8103049_ACTTACTTCCGTTGCT	0.00752882	0.00352926	0.00325405	0.00738861	0.0013608	0.0261808	0.0245513	0.0158621	0.814308	0.0116284	0.00219512	0.00162762	0.0106649
FCA_GND8103049_ACTTACTTCGAATCCA	0.00717205	0.00151587	0.00109812	0.00216312	0.000660382	0.00250798	0.00129134	0.00812061	0.942263	0.0023661	0.00109834	0.00146235	0.00105454
FCA_GND8103049_ACTTACTTCTAACGGT	0.0380739	0.0280726	0.037962	0.0333298	0.388627	0.0740619	0.274147	0.0100691	0.0248265	0.0101519	0.00695797	0.00591365	0.0209791
FCA_GND8103049_ACTTACTTCTGCAGTA	0.045953	0.0463371	0.0362473	0.0185441	0.530679	0.0730681	0.13171	0.01508	0.0283417	0.0111251	0.00655056	0.00609691	0.010802
FCA_GND8103049_ACTTACTTCTTTAGGG	0.032955	0.0238811	0.012131	0.032969	0.319555	0.0819009	0.337827	0.0162825	0.0436391	0.00893714	0.00591053	0.00576531	0.0118468
FCA_GND8103049_ACTTGTTCAACCGCCA	0.0805122	0.0704292	0.0426494	0.0493382	0.250615	0.203124	0.0998792	0.0190525	0.0761601	0.0133723	0.00891507	0.00802512	0.013563
FCA_GND8103049_ACTTGTTCACGTGAGA	0.0124094	0.0160709	0.00800895	0.0183608	0.00279231	0.0160477	0.0098108	0.0479726	0.357385	0.201378	0.0104984	0.00295928	0.00587183
FCA_GND8103049_ACTTGTTCACTTCGAA	0.0281661	0.0111892	0.00760273	0.00650569	0.00280132	0.00580754	0.00413617	0.186559	0.686112	0.0181453	0.00243311	0.0020237	0.00447992
FCA_GND8103049_ACTTGTTCAGTCTTCC	0.0180316	0.0292964	0.014955	0.0148595	0.624888	0.0792571	0.105545	0.0105597	0.0248766	0.00636678	0.00995019	0.0066097	0.0197072
FCA_GND8103049_ACTTGTTGTCCGCTGA	0.0286707	0.018576	0.0208559	0.0206911	0.00671343	0.0749935	0.0245651	0.194548	0.286194	0.0512968	0.0185608	0.00675731	0.049806
FCA_GND8103049_ACTTGTTTCAATAAGG	0.0494189	0.0291262	0.0260017	0.0221275	0.4769	0.152483	0.0642291	0.010692	0.0593774	0.0109089	0.00516913	0.0072622	0.0185602
FCA_GND8103049_ACTTGTTTCTGCAGTA	0.0386702	0.0093221	0.00459617	0.01163	0.00205635	0.0242611	0.00731891	0.0110533	0.778912	0.0110831	0.00192101	0.00255441	0.0043856
FCA_GND8103049_ACTTGTTTCTTCATGT	0.0179874	0.0138393	0.0140944	0.0188566	0.00453698	0.0287257	0.0109721	0.032568	0.449297	0.142137	0.038252	0.00320916	0.00596351
FCA_GND8103049_ACTTGTTTCTTGCATT	0.0214937	0.0156431	0.0100039	0.0182743	0.00517078	0.0641987	0.0110426	0.0116728	0.163194	0.0134967	0.0254069	0.00266907	0.00595205
FCA_GND8103049_ACTTTCACAGTATGCT	0.0123989	0.0280402	0.0114739	0.012696	0.542095	0.1411	0.135138	0.00821085	0.0209138	0.00740702	0.00495851	0.00523536	0.0144356
FCA_GND8103049_ACTTTCACATAGTAAG	0.00439162	0.00146006	0.00579387	0.0033614	0.00054631	0.00378014	0.00298198	0.000647457	0.00434763	0.00156742	0.00122907	0.00192723	0.955211
FCA_GND8103049_ACTTTCAGTCTGGTCG	0.00908914	0.00754225	0.00257183	0.013805	0.00210825	0.0201829	0.00701211	0.00206255	0.00350393	0.0018673	0.00259108	0.00222641	0.294056
FCA_GND8103049_ACTTTCATCAGCGATT	0.142537	0.0270565	0.0164543	0.0431678	0.00642715	0.0542324	0.0237337	0.0532628	0.276996	0.0802677	0.0172615	0.00629864	0.0112918
FCA_GND8103049_ACTTTCATCCAAAGTC	0.0117601	0.00662433	0.00445708	0.0106554	0.00150869	0.0205451	0.00704411	0.0158929	0.62717	0.0470572	0.00303676	0.00344087	0.0100032
FCA_GND8103049_AGAATAGAGACCTTTG	0.00904183	0.00420191	0.00705521	0.00563942	0.00238429	0.0111686	0.0102514	0.151578	0.681383	0.0445745	0.00522223	0.00343683	0.00528387
FCA_GND8103049_AGAATAGAGCTCAACT	0.0446894	0.0458139	0.0230597	0.0200877	0.283699	0.188281	0.274574	0.013476	0.035077	0.00889817	0.00621261	0.00687317	0.0134076
FCA_GND8103049_AGAATAGAGGTGATTA	0.00576473	0.0067872	0.00288726	0.0107207	0.00284576	0.80796	0.0742907	0.00234785	0.00648349	0.00155157	0.00239887	0.00260408	0.00526342
FCA_GND8103049_AGAATAGCAGACACTT	0.0585834	0.0200755	0.0136062	0.0398402	0.0120807	0.168205	0.61582	0.00429532	0.0121504	0.00344682	0.00340157	0.0052936	0.0119088
FCA_GND8103049_AGAATAGCAGTATAAG	0.0220315	0.00682821	0.00182211	0.069637	0.00248765	0.0048162	0.875717	0.00230199	0.00156876	0.000819847	0.00171698	0.00187563	0.000921879
FCA_GND8103049_AGAATAGGTCGCCATG	0.00166976	0.00119537	0.00170653	0.00256569	0.000893912	0.00743103	0.00298385	0.0462249	0.389893	0.0268125	0.00578671	0.00111401	0.00213939
FCA_GND8103049_AGACGTTAGCTGAACG	0.00413904	0.00208541	0.00126817	0.00408055	0.00361321	0.00243256	0.00285144	0.00186031	0.00234934	0.00211339	0.00118932	0.00124036	0.958957
FCA_GND8103049_AGACGTTAGGTCGGAT	0.09005	0.074451	0.0429262	0.0374157	0.237253	0.234866	0.0987146	0.0169931	0.0378379	0.0132173	0.0107877	0.00726391	0.0298618
FCA_GND8103049_AGACGTTCAAGTCATC	0.0109599	0.00650597	0.00489487	0.0111464	0.00180796	0.0116161	0.0228987	0.140282	0.732287	0.0187419	0.00282962	0.00198189	0.00454782
FCA_GND8103049_AGACGTTCAGACTCGC	0.00524658	0.00637409	0.00337626	0.00627516	0.00120254	0.0104385	0.00242924	0.0152347	0.754842	0.0489419	0.00143496	0.00134588	0.00320814
FCA_GND8103049_AGACGTTTCGTCACGG	0.00116122	0.000955308	0.000583976	0.00182113	0.00112397	0.0140991	0.00108167	0.0007317	0.00324316	0.00161118	0.00104158	0.000764848	0.00890792
FCA_GND8103049_AGACGTTTCTCTAGGA	0.00484931	0.0128212	0.00208994	0.0100457	0.00104349	0.0169091	0.0026148	0.0170786	0.600554	0.0122687	0.00389996	0.00171848	0.00306482
FCA_GND8103049_AGAGCGAAGACTAGGC	0.0494539	0.0345844	0.0259958	0.0205504	0.370326	0.187974	0.131364	0.01375	0.0607734	0.0153961	0.00984022	0.00652387	0.0132956
FCA_GND8103049_AGAGCGAAGCGGCTTC	0.00387223	0.0051905	0.00284472	0.00467415	0.00176316	0.0611028	0.00255152	0.00179272	0.0167658	0.000921755	0.00150314	0.00142541	0.0119828
FCA_GND8103049_AGAGCGAAGGTAGCTG	0.0873881	0.0429178	0.0362328	0.0249403	0.259634	0.1614	0.144284	0.017673	0.0256892	0.0167514	0.00925872	0.00736216	0.0300246
FCA_GND8103049_AGAGCGACACAACGTT	0.016538	0.00787633	0.00486367	0.00999174	0.00153759	0.0352948	0.00671359	0.0321859	0.803344	0.0224406	0.0177442	0.00200226	0.00234483
FCA_GND8103049_AGAGCGAGTTCTGAAC	0.00382019	0.00582815	0.00190144	0.00825743	0.00119268	0.00598035	0.00234493	0.00784376	0.468851	0.0232941	0.0032986	0.00149417	0.00158791
FCA_GND8103049_AGAGCGAGTTGCGTTA	0.19365	0.0582289	0.0221257	0.018316	0.0508748	0.389167	0.136384	0.00929781	0.0351646	0.00825652	0.00451463	0.00475876	0.0192421
FCA_GND8103049_AGAGCGATCTATGTGG	0.0545768	0.0111393	0.00664996	0.0334256	0.00399802	0.158108	0.0291677	0.00396644	0.0169497	0.00266334	0.00313502	0.00273476	0.0161323
FCA_GND8103049_AGAGCTTAGCGTCAAG	0.0858492	0.0414554	0.0426594	0.0225764	0.306637	0.114251	0.147196	0.0255212	0.0595614	0.014877	0.0126601	0.0103163	0.0225698
FCA_GND8103049_AGAGCTTAGTGATCGG	0.0116104	0.0146716	0.00474173	0.0183957	0.00112497	0.0406317	0.007699	0.0126634	0.716333	0.0138483	0.00515243	0.00208534	0.00285777
FCA_GND8103049_AGAGCTTGTTCCCTTG	0.0109492	0.00939052	0.00438341	0.0100687	0.00238366	0.0143061	0.0053288	0.0265293	0.679925	0.0335648	0.00808362	0.00251432	0.00309521
FCA_GND8103049_AGAGCTTGTTTGACAC	0.0566356	0.0255666	0.037242	0.0156074	0.262812	0.300644	0.100492	0.0242095	0.0634494	0.0114837	0.0091427	0.00796307	0.0205264
FCA_GND8103049_AGAGTGGAGTATCTCG	0.0185707	0.00514912	0.00614802	0.00688073	0.00146395	0.00251013	0.00220148	0.00215335	0.00578252	0.00481231	0.00245527	0.00270967	0.919427
FCA_GND8103049_AGAGTGGAGTTATCGC	0.181812	0.0269566	0.00474619	0.0646068	0.00510262	0.0250763	0.571789	0.00672322	0.00796317	0.0032557	0.00353008	0.00420684	0.0053479
FCA_GND8103049_AGAGTGGCAAACCTAC	0.0195203	0.0100088	0.00904225	0.0112777	0.00363506	0.0123181	0.0105743	0.0484077	0.462904	0.0306409	0.00458526	0.0033376	0.00515757
FCA_GND8103049_AGAGTGGCAGTCAGCC	0.074294	0.0130639	0.0138929	0.0209087	0.00571413	0.0453151	0.0146645	0.0315499	0.431575	0.0589918	0.0123588	0.00513209	0.0112467
FCA_GND8103049_AGAGTGGCATCTATGG	0.0433425	0.0275242	0.0170731	0.0320054	0.33282	0.160651	0.196908	0.0184563	0.0359328	0.0126321	0.00821763	0.00965413	0.0268754
FCA_GND8103049_AGAGTGGGTCCGCTGA	0.0191837	0.0167159	0.0193286	0.0258058	0.00948482	0.043585	0.0211137	0.122255	0.259484	0.261501	0.0244444	0.00691678	0.0106116
FCA_GND8103049_AGAGTGGGTCCTCCAT	0.00762255	0.00464224	0.00431677	0.0077181	0.000971691	0.0146874	0.00449247	0.00925056	0.719675	0.0190863	0.00316238	0.00175524	0.00495318
FCA_GND8103049_AGAGTGGGTCGTTGTA	0.0564472	0.0133498	0.0091408	0.0234146	0.00298654	0.260168	0.0200881	0.017496	0.266796	0.00900751	0.00573787	0.00286774	0.0176211
FCA_GND8103049_AGAGTGGTCGGCGCAT	0.342483	0.0738972	0.0339248	0.0282019	0.0677491	0.140251	0.143497	0.0137712	0.052113	0.0125698	0.00678615	0.00654811	0.012825
FCA_GND8103049_AGAGTGGTCTATCCTA	0.0174586	0.0154917	0.00941429	0.0152089	0.00199067	0.0511188	0.0121037	0.0445833	0.444443	0.0498967	0.0176516	0.00329474	0.0108014
FCA_GND8103049_AGATCTGCAACTGGCC	0.0261217	0.0395778	0.0164811	0.0191467	0.405043	0.206326	0.133886	0.0119078	0.0271889	0.00939797	0.00557963	0.0060465	0.01729
FCA_GND8103049_AGATCTGCATGCAACT	0.261012	0.0184497	0.0283642	0.0690954	0.0103599	0.172459	0.0343714	0.0256517	0.182858	0.0146356	0.00483715	0.00496592	0.0245405
FCA_GND8103049_AGATCTGGTTACAGAA	0.00935526	0.00572901	0.00201901	0.00733797	0.00078732	0.00473273	0.00297288	0.00345391	0.00805571	0.00454867	0.00228255	0.00162328	0.933741
FCA_GND8103049_AGATCTGGTTCACGGC	0.00423382	0.00282429	0.00205516	0.00425587	0.0010413	0.00903629	0.00337604	0.00949443	0.591422	0.0433387	0.00232691	0.00128501	0.00132773
FCA_GND8103049_AGATTGCAGCAGGCTA	0.00117807	0.00175597	0.00134094	0.00407021	0.000972454	0.00986221	0.0024408	0.0203585	0.778459	0.0029595	0.00257361	0.00129645	0.000782351
FCA_GND8103049_AGATTGCCACAGAGGT	0.00718671	0.0136772	0.00616074	0.0113872	0.00467318	0.0180652	0.00866619	0.0179626	0.0615933	0.0308195	0.0185633	0.00276989	0.0877899
FCA_GND8103049_AGATTGCCAGAAGCAC	0.00390056	0.00793316	0.0101801	0.00485255	0.00636878	0.00174957	0.00246835	0.00180957	0.00564044	0.00239136	0.00330122	0.0113618	0.00304849
FCA_GND8103049_AGATTGCCATCAGTAC	0.0428536	0.0140372	0.0240735	0.0168992	0.00454845	0.0212468	0.0223771	0.0400224	0.635048	0.0593853	0.00682905	0.00338928	0.00736582
FCA_GND8103049_AGATTGCCATGTAGTC	0.0106861	0.010818	0.00671495	0.0135139	0.00245237	0.0180818	0.00630542	0.0180816	0.634864	0.0645797	0.0090448	0.0022571	0.00368686
FCA_GND8103049_AGATTGCGTAAGGGCT	0.00654655	0.0106069	0.00739618	0.010847	0.00265163	0.0110491	0.00521816	0.0459923	0.47895	0.316106	0.00578552	0.00573616	0.0048145
FCA_GND8103049_AGATTGCGTACCTACA	0.0503738	0.0174787	0.0230689	0.0316657	0.00837954	0.133484	0.0927549	0.0225193	0.346692	0.0224782	0.00954365	0.0043702	0.00579205
FCA_GND8103049_AGATTGCGTCTTGCGG	0.0274693	0.0118257	0.00712158	0.0183708	0.00152115	0.148971	0.730135	0.00280195	0.0157249	0.00320019	0.0025069	0.00228214	0.00388357
FCA_GND8103049_AGATTGCGTGCGCTTG	0.00566754	0.00197766	0.00096844	0.00682658	0.000456526	0.00304405	0.00237933	0.00214505	0.00320254	0.00175158	0.00254317	0.0017665	0.93639
FCA_GND8103049_AGATTGCGTTCTGGTA	0.00505444	0.00565419	0.00444119	0.00850034	0.00140298	0.00606108	0.00227378	0.0230827	0.77229	0.0110143	0.00155107	0.00133746	0.00261055
FCA_GND8103049_AGATTGCTCAGCATGT	0.00492932	0.00327309	0.0028515	0.00755181	0.00127026	0.0147797	0.00579225	0.0260181	0.813329	0.042079	0.0269285	0.00219958	0.00266611
FCA_GND8103049_AGATTGCTCGGCGCTA	0.0404602	0.0158788	0.0118738	0.0168704	0.00348501	0.0212256	0.0100304	0.0176858	0.707867	0.0125057	0.00436629	0.00357263	0.00470796
FCA_GND8103049_AGCAGCCAGAAACCAT	0.00543776	0.00218705	0.00400057	0.00543779	0.00258039	0.01439	0.00576392	0.0225777	0.783843	0.0283363	0.00759945	0.00346727	0.00603378
FCA_GND8103049_AGCAGCCAGCGATCCC	0.00165417	0.00363025	0.00211689	0.00268635	0.00124506	0.329336	0.00362777	0.0018033	0.00778265	0.00148161	0.00288632	0.0028304	0.0293951
FCA_GND8103049_AGCAGCCAGTAGTGCG	0.00804165	0.00579383	0.00713692	0.00915759	0.00430066	0.0186238	0.0338413	0.0448423	0.534283	0.0990604	0.0142169	0.00425844	0.00600556
FCA_GND8103049_AGCAGCCCACGGTTTA	0.00701336	0.011323	0.0037319	0.0092155	0.00128878	0.00999755	0.00803704	0.0952159	0.656188	0.0211222	0.00326739	0.00256202	0.00347272
FCA_GND8103049_AGCAGCCGTCGACTGC	0.00685275	0.0035859	0.00184389	0.00893802	0.00114691	0.0172549	0.940742	0.00153687	0.00213159	0.00169425	0.00107798	0.00120426	0.00095314
FCA_GND8103049_AGCAGCCGTGTAACGG	0.0170356	0.00913881	0.0049553	0.021755	0.0025635	0.0738407	0.0173301	0.00592962	0.0556617	0.00369692	0.00399032	0.00463923	0.282386
FCA_GND8103049_AGCAGCCTCCCAGGTG	0.0343681	0.0169415	0.0147241	0.0151927	0.00592854	0.0141111	0.00978965	0.231285	0.412576	0.0885423	0.011325	0.00438527	0.00701123
FCA_GND8103049_AGCAGCCTCCGAAGAG	0.0028395	0.00269543	0.00176005	0.00523334	0.00130713	0.00734187	0.00338323	0.0868199	0.734072	0.041131	0.00179547	0.00161421	0.00279082
FCA_GND8103049_AGCAGCCTCTGAAAGA	0.0270635	0.0167972	0.00375493	0.0239055	0.00182871	0.0741055	0.0069389	0.00588353	0.0815207	0.00873419	0.00440669	0.00486602	0.0564206
FCA_GND8103049_AGCATACAGATGAGAG	0.01267	0.0242685	0.0122358	0.0156577	0.614846	0.0675943	0.156407	0.00858526	0.0236111	0.00547124	0.00397564	0.00594958	0.00944844
FCA_GND8103049_AGCATACAGCGGATCA	0.0044867	0.00326852	0.00273731	0.00786369	0.00161458	0.0136064	0.00214298	0.00388127	0.0150794	0.00470817	0.00351366	0.00285595	0.368602
FCA_GND8103049_AGCATACAGCTGTCTA	0.00665777	0.00523941	0.0046258	0.00706463	0.00299971	0.0153552	0.00829366	0.0203783	0.0861841	0.0343498	0.04805	0.00261277	0.00727449
FCA_GND8103049_AGCATACCAAAGTCAA	0.000308543	0.000400134	0.987645	0.00264016	0.000834696	0.000255059	0.00147695	0.000284084	0.00049838	0.000361211	0.00139507	0.00131222	0.000799966
FCA_GND8103049_AGCATACCAGGATTGG	0.00455672	0.00271162	0.00472216	0.00352611	0.00183392	0.00334196	0.00142739	0.0415033	0.893552	0.00644318	0.00242047	0.00141909	0.00150989
FCA_GND8103049_AGCATACTCAAGAAGT	0.00918006	0.00288654	0.00614108	0.00269083	0.00173386	0.0039189	0.00285027	0.306291	0.558961	0.0797216	0.00363538	0.00236587	0.00210725
FCA_GND8103049_AGCCTAAAGGATGGAA	0.0367606	0.0268712	0.0215945	0.0173479	0.529848	0.0878903	0.156586	0.0164961	0.0275816	0.0106127	0.0089162	0.00688157	0.0122658
FCA_GND8103049_AGCCTAACACATCCGG	0.00964044	0.00187249	0.00183412	0.0040103	0.00143697	0.0128614	0.00469907	0.0136823	0.876186	0.00422634	0.00131482	0.00174016	0.00185867
FCA_GND8103049_AGCCTAACAGGGATTG	0.0125494	0.0101609	0.0121439	0.00821457	0.789806	0.0476753	0.0571888	0.00506071	0.0130734	0.00472811	0.00392342	0.0044227	0.00570899
FCA_GND8103049_AGCCTAACAGTTTACG	0.0177561	0.023007	0.00698331	0.0321121	0.00505564	0.0283189	0.0489551	0.297449	0.315873	0.0227379	0.0133061	0.00654304	0.00823765
FCA_GND8103049_AGCCTAATCCAAAGTC	0.170723	0.0300548	0.018855	0.0394971	0.0339583	0.184936	0.317891	0.0131569	0.0382138	0.0086451	0.00760564	0.00691187	0.0531919
FCA_GND8103049_AGCCTAATCGAGCCCA	0.0326466	0.0166979	0.00434582	0.0165166	0.00288833	0.0394446	0.00895315	0.0253302	0.310149	0.0254478	0.00466785	0.00261298	0.00279958
FCA_GND8103049_AGCCTAATCTCTAAGG	0.0117124	0.00961828	0.00290831	0.0126728	0.000655772	0.00540788	0.00388932	0.00151162	0.00347193	0.00164764	0.00119724	0.00116293	0.930622
FCA_GND8103049_AGCGGTCCACTAGTAC	0.128174	0.0529224	0.0404501	0.039041	0.0145653	0.0682461	0.0435695	0.0524547	0.26185	0.0183897	0.00690909	0.00540243	0.177999
FCA_GND8103049_AGCGGTCCAGCTCCGA	0.0113513	0.00467853	0.00586803	0.00910488	0.00323637	0.0191934	0.00654868	0.0506309	0.711742	0.0420828	0.00481657	0.00291989	0.00608231
FCA_GND8103049_AGCGGTCCAGGCAGTA	0.039293	0.0230161	0.00734799	0.0260066	0.00351074	0.085666	0.0247615	0.0339507	0.567088	0.012088	0.00401246	0.00400209	0.00798059
FCA_GND8103049_AGCGGTCTCATCTGTT	0.0287313	0.0442212	0.0182917	0.01908	0.37058	0.181133	0.234511	0.00877908	0.0245898	0.00720527	0.00596683	0.00547152	0.0125037
FCA_GND8103049_AGCGGTCTCCACTGGG	0.00647422	0.00431206	0.00478183	0.00983456	0.00218699	0.0216367	0.0195222	0.0204962	0.509125	0.0994035	0.0504557	0.0036187	0.00265739
FCA_GND8103049_AGCGGTCTCCAGTATG	0.0615082	0.0638921	0.0216343	0.0315552	0.349744	0.088675	0.235882	0.0257339	0.0366169	0.0113121	0.00782554	0.00761586	0.0129712
FCA_GND8103049_AGCGGTCTCCTTTACA	0.0110974	0.00445766	0.00201702	0.01722	0.0011208	0.00805795	0.00628409	0.00408005	0.00974952	0.00371446	0.00822539	0.00299894	0.761887
FCA_GND8103049_AGCGGTCTCGAGAGCA	0.00790167	0.00488819	0.00647091	0.00691663	0.00160523	0.0299403	0.00288939	0.00868062	0.487154	0.0395784	0.00437747	0.00145107	0.00420917
FCA_GND8103049_AGCGGTCTCGCTTGTC	0.0163817	0.0106812	0.00199878	0.0100141	0.000875997	0.00755208	0.00404426	0.00355202	0.0110809	0.00550184	0.00260312	0.00287794	0.90608
FCA_GND8103049_AGCGGTCTCTGTCTAT	0.0104097	0.00269243	0.00393276	0.00480789	0.00130277	0.0132674	0.00771506	0.0849611	0.823078	0.0203712	0.00172915	0.00156587	0.00367537
FCA_GND8103049_AGCGTATAGTACGACG	0.00642507	0.00420999	0.00501928	0.00678381	0.00123533	0.0459832	0.015206	0.0302773	0.781184	0.0305743	0.00188918	0.00334007	0.00213441
FCA_GND8103049_AGCGTATCAGCTTCGG	0.451074	0.0667252	0.0261599	0.101271	0.00425036	0.0501161	0.187932	0.0104986	0.0448125	0.00713636	0.00418348	0.00479574	0.00809244
FCA_GND8103049_AGCGTATGTAAAGGAG	0.00772815	0.00206101	0.00954857	0.0055612	0.00351096	0.0435354	0.0312364	0.00580409	0.178039	0.00800854	0.00583695	0.00216693	0.00203178
FCA_GND8103049_AGCGTATTCACATACG	0.00320035	0.00162609	0.00165079	0.00510689	0.000877386	0.0135845	0.00611109	0.0196662	0.738171	0.0246656	0.00267521	0.00195241	0.00197442
FCA_GND8103049_AGCGTATTCGCCAAAT	0.0138249	0.00313417	0.00646614	0.00408838	0.00177885	0.016567	0.00561807	0.0195001	0.728084	0.0151777	0.00210536	0.00181812	0.00198259
FCA_GND8103049_AGCGTATTCGTACGGC	0.0128386	0.00531923	0.00719337	0.00825487	0.00292908	0.123854	0.0117039	0.00487507	0.0886616	0.00266598	0.00253418	0.003793	0.0254396
FCA_GND8103049_AGCGTCGAGAGGGATA	0.0377317	0.0185569	0.00644558	0.0363328	0.0021687	0.0538228	0.0104008	0.0155206	0.545716	0.0166012	0.00390749	0.0027887	0.00307123
FCA_GND8103049_AGCGTCGAGGCTATCT	0.00917972	0.00594664	0.00361311	0.00425232	0.00108676	0.00687503	0.00344836	0.0192528	0.892866	0.0333527	0.000889993	0.00180504	0.00122341
FCA_GND8103049_AGCGTCGCACTCAGGC	0.106621	0.0521725	0.0395686	0.0213023	0.275697	0.21618	0.0815336	0.0146163	0.0548225	0.0127697	0.00718919	0.00696652	0.0204113
FCA_GND8103049_AGCGTCGCATATGAGA	0.0901826	0.0461859	0.0241129	0.0411108	0.00629664	0.0437863	0.0206454	0.0249262	0.352643	0.0220225	0.0121209	0.00576473	0.00882315
FCA_GND8103049_AGCGTCGCATGCTGGC	0.0283543	0.0243832	0.0101529	0.0838263	0.00419516	0.0874593	0.0171873	0.0136029	0.0703838	0.00722835	0.0105545	0.00344068	0.00967106
FCA_GND8103049_AGCGTCGCATTGGTAC	0.109965	0.062954	0.0319962	0.0297903	0.236416	0.203064	0.119066	0.0182034	0.0655172	0.0154392	0.00718488	0.00900377	0.0277075
FCA_GND8103049_AGCGTCGGTAAGAGGA	0.0212865	0.0167039	0.0184273	0.0201642	0.0094281	0.0412145	0.0192008	0.0402427	0.31979	0.339789	0.0111173	0.00495121	0.00918934
FCA_GND8103049_AGCGTCGTCCCAACGG	0.0559368	0.03259	0.0190071	0.0292042	0.00648759	0.0890192	0.0212529	0.189593	0.196037	0.13435	0.0369044	0.00771327	0.0384115
FCA_GND8103049_AGCTCCTAGAGCCCAA	0.00987809	0.00754384	0.00341527	0.00383127	0.000901801	0.00568795	0.00329368	0.0292214	0.912516	0.00760083	0.00106695	0.00138278	0.00143597
FCA_GND8103049_AGCTCCTAGATGTCGG	0.00312551	0.0102658	0.012449	0.00685736	0.0122203	0.00281301	0.00649117	0.00280939	0.0135219	0.00266066	0.00587045	0.00770516	0.00507342
FCA_GND8103049_AGCTCCTAGGGTGTTG	0.0714462	0.0169748	0.0100177	0.0793337	0.00435673	0.0334428	0.0578039	0.127908	0.422584	0.0396585	0.00851516	0.00510279	0.00424953
FCA_GND8103049_AGCTCCTAGGTTACCT	0.371333	0.0629724	0.0222033	0.106913	0.00333813	0.0727627	0.277442	0.00699839	0.0235559	0.00476318	0.00407858	0.00389756	0.00600206
FCA_GND8103049_AGCTCCTCAGTCCTTC	0.0159378	0.0168258	0.00464819	0.0209912	0.00233068	0.024567	0.00751934	0.0189484	0.283304	0.00650482	0.00335383	0.00397123	0.0103835
FCA_GND8103049_AGCTCCTCATGCGCAC	0.0658486	0.0444963	0.0256566	0.0489544	0.257361	0.276857	0.16016	0.00891682	0.0244518	0.00870724	0.00512233	0.00649473	0.0142376
FCA_GND8103049_AGCTCCTGTCTAGCGC	0.00862045	0.00848662	0.00324639	0.0184935	0.00220646	0.0161424	0.00921002	0.0224576	0.26055	0.0507775	0.00508806	0.00221809	0.00269644
FCA_GND8103049_AGCTCCTGTTCCAACA	0.00709559	0.00894571	0.00356971	0.00540662	0.00182986	0.0163147	0.00306887	0.0160671	0.00854065	0.00330237	0.00284996	0.00207448	0.474876
FCA_GND8103049_AGCTCCTGTTTCGCTC	0.0336653	0.0647831	0.0205484	0.021771	0.382619	0.0599966	0.2734	0.0190254	0.0446792	0.00862553	0.0105091	0.00902264	0.0126322
FCA_GND8103049_AGCTCCTTCTTTAGTC	0.0041939	0.00190983	0.00302751	0.00287495	0.000678785	0.00331352	0.0024652	0.0176643	0.91085	0.0114482	0.00990684	0.00155731	0.000748597
FCA_GND8103049_AGCTCTCCACGGTGTC	0.0414542	0.0349172	0.0208135	0.01547	0.545852	0.103325	0.0877547	0.0164184	0.0466296	0.0121596	0.00858087	0.00675287	0.019308
FCA_GND8103049_AGCTCTCCATGATCCA	0.00402298	0.00333496	0.00251894	0.00391975	0.00143622	0.0375585	0.00386095	0.00447329	0.0412402	0.00530437	0.00379363	0.00160227	0.0260246
FCA_GND8103049_AGCTCTCCATGCCACG	0.00241895	0.00258973	0.00172878	0.00122141	0.00112856	0.0051584	0.00166702	0.0362242	0.917489	0.0154793	0.000923	0.00131405	0.00222921
FCA_GND8103049_AGCTCTCGTGAGGGAG	0.0195299	0.0152156	0.0065521	0.0158925	0.00339944	0.334625	0.00949557	0.00690189	0.0286639	0.00271759	0.00211543	0.0037513	0.0179884
FCA_GND8103049_AGCTCTCTCAAGGTAA	0.00481451	0.00575851	0.00340151	0.00865105	0.00150814	0.0108968	0.00725701	0.00910779	0.315341	0.0740001	0.00827666	0.00260653	0.00258221
FCA_GND8103049_AGCTCTCTCAGGCGAA	0.0869376	0.0389523	0.0503824	0.0251667	0.185435	0.295918	0.0539894	0.0233039	0.108594	0.0189537	0.011137	0.00751416	0.0157774
FCA_GND8103049_AGCTCTCTCCGTAGTA	0.00839987	0.00508296	0.00356854	0.0094611	0.00150368	0.00739647	0.00568741	0.0442627	0.817701	0.0169042	0.00239768	0.00232857	0.00303221
FCA_GND8103049_AGCTCTCTCCTTGGTC	0.000227507	0.000383178	0.000919679	0.000444893	0.00141018	0.000200318	0.000410444	0.000311129	0.000224639	0.000309655	0.000884409	0.000585391	0.00089767
FCA_GND8103049_AGCTCTCTCTAACTTC	0.0271261	0.0300424	0.0210674	0.0290262	0.672977	0.0616623	0.0782025	0.00756495	0.0163169	0.00530888	0.00593408	0.00618883	0.0126091
FCA_GND8103049_AGCTTGAAGGTGTGGT	0.0656661	0.0231693	0.0075574	0.0336811	0.00220665	0.0294174	0.013238	0.00824898	0.0170926	0.0109135	0.00406501	0.00277689	0.716045
FCA_GND8103049_AGCTTGACACACATGT	0.0267981	0.0180965	0.00364491	0.0201767	0.00156081	0.0868559	0.00854391	0.00501487	0.00877416	0.00262113	0.00363693	0.00250004	0.482691
FCA_GND8103049_AGCTTGACACCAGGCT	0.0279303	0.0184807	0.0411857	0.0158739	0.566803	0.0541177	0.0598904	0.0212394	0.0600635	0.0213499	0.0149545	0.00900121	0.0209165
FCA_GND8103049_AGCTTGACATGAAGTA	0.00419996	0.00306471	0.00125779	0.00753983	0.00054	0.00464411	0.0022947	0.00235333	0.00508377	0.00196752	0.00263826	0.00204731	0.950569
FCA_GND8103049_AGCTTGAGTAAACCTC	0.00721502	0.0066519	0.00223198	0.0100635	0.000835534	0.00825748	0.00372322	0.00879679	0.885385	0.0168561	0.00170922	0.00277635	0.00165174
FCA_GND8103049_AGCTTGAGTCAGAAGC	0.063212	0.0500606	0.040986	0.0210369	0.207258	0.354814	0.0799643	0.013857	0.0628694	0.0110191	0.00591284	0.00631792	0.0150558
FCA_GND8103049_AGCTTGATCTCTGCTG	0.0469016	0.0111723	0.00426941	0.0227629	0.0018495	0.0127156	0.0173414	0.00506917	0.0104849	0.00678373	0.00752741	0.00516707	0.815525
FCA_GND8103049_AGGCCACAGCGACGTA	0.0242228	0.017984	0.00803287	0.01972	0.00647011	0.0640108	0.0189015	0.0163317	0.0385356	0.00893201	0.00644044	0.00640276	0.625998
FCA_GND8103049_AGGCCACCACCAGGCT	0.215821	0.030945	0.0273593	0.0326901	0.00936867	0.0858779	0.0242085	0.0336247	0.274526	0.0360346	0.0124116	0.00607923	0.0158621
FCA_GND8103049_AGGCCACCAGTAGAGC	0.0838038	0.0742486	0.0294055	0.0402215	0.00585294	0.115958	0.0233286	0.0316499	0.207344	0.116854	0.081594	0.00787338	0.0117475
FCA_GND8103049_AGGCCACCATACTCTT	0.0111746	0.01019	0.00805129	0.0105447	0.00217455	0.0530999	0.00633432	0.0463757	0.317033	0.0190796	0.0249475	0.00254043	0.0120331
FCA_GND8103049_AGGCCGTAGAGGGATA	0.00406876	0.00446148	0.00630382	0.00198822	0.00140862	0.00782929	0.0025647	0.118846	0.810542	0.0260307	0.00118488	0.00189961	0.00180079
FCA_GND8103049_AGGCCGTCAAGTTGTC	0.0230543	0.0195083	0.00889132	0.0211426	0.00219463	0.0482468	0.00724052	0.0485432	0.252957	0.0566087	0.0141381	0.00412986	0.0492646
FCA_GND8103049_AGGCCGTCAGCTATTG	0.0152022	0.0203535	0.0151154	0.0130703	0.579584	0.150345	0.087961	0.0130458	0.0434634	0.00862674	0.00548027	0.0063606	0.0108592
FCA_GND8103049_AGGCCGTCAGCTGTTA	0.235786	0.0393221	0.010724	0.0867163	0.005321	0.071364	0.480468	0.00690132	0.0115503	0.00441329	0.00290694	0.00306915	0.00629758
FCA_GND8103049_AGGCCGTCATCCGCGA	0.00523893	0.00236312	0.00130718	0.00350939	0.000491421	0.00396999	0.0017481	0.00219996	0.00429532	0.00451992	0.00299549	0.00148843	0.93676
FCA_GND8103049_AGGCCGTGTCTACCTC	0.001314	0.00105037	0.00185806	0.00153608	0.000871475	0.0277031	0.00243446	0.00558511	0.14479	0.0046995	0.00304259	0.000998567	0.00570239
FCA_GND8103049_AGGCCGTTCAAGCCTA	0.00983937	0.00936711	0.0105453	0.0107112	0.006052	0.0170564	0.0121531	0.0762484	0.515049	0.16137	0.0551278	0.00530521	0.0101101
FCA_GND8103049_AGGCCGTTCCTCCTAG	0.0348375	0.0959307	0.0227092	0.054444	0.356279	0.0740314	0.190823	0.0269417	0.0516055	0.0123368	0.00971306	0.00695044	0.0136073
FCA_GND8103049_AGGCCGTTCGGACAAG	0.00659943	0.00515389	0.0546355	0.0100552	0.00117292	0.0152538	0.00803564	0.0012257	0.00467676	0.00201286	0.00119406	0.00194695	0.871181
FCA_GND8103049_AGGCCGTTCTGTCAAG	0.021328	0.0208727	0.0158408	0.0256335	0.00620818	0.0396612	0.0156582	0.0347673	0.358123	0.263588	0.017688	0.00573679	0.0120477
FCA_GND8103049_AGGGAGTAGCGGCTTC	0.133429	0.0475961	0.0331203	0.0408149	0.137327	0.269166	0.152811	0.0115892	0.0419778	0.0122748	0.00841468	0.0079031	0.0334697
FCA_GND8103049_AGGGAGTAGGTGATAT	0.0293965	0.0298866	0.0166538	0.0323603	0.00504916	0.0500663	0.0196612	0.0140654	0.0751407	0.401942	0.0417951	0.00641088	0.0105832
FCA_GND8103049_AGGGAGTCAATGGATA	0.0476074	0.0381848	0.0179042	0.0194079	0.35683	0.0874423	0.175946	0.0202833	0.100076	0.0115547	0.00792957	0.0106256	0.0122943
FCA_GND8103049_AGGGAGTCATCACGAT	0.0529821	0.0268105	0.0103166	0.0159902	0.00886715	0.00834836	0.00829605	0.631665	0.132939	0.0236649	0.00550877	0.00468873	0.00612897
FCA_GND8103049_AGGGAGTGTCAAACTC	0.0375977	0.0340799	0.0342199	0.0178678	0.351072	0.191226	0.0774903	0.0167812	0.0360558	0.0156183	0.0110481	0.00706112	0.0562477
FCA_GND8103049_AGGGAGTGTCCATGAT	0.420658	0.0387735	0.0108646	0.129973	0.00368654	0.0454127	0.287496	0.00521604	0.0112175	0.00400836	0.00395983	0.00443047	0.00639426
FCA_GND8103049_AGGGAGTGTTAAGGGC	0.0237345	0.0365121	0.0189081	0.0200366	0.447863	0.149661	0.146647	0.0153454	0.0451057	0.0152194	0.00757312	0.00653023	0.0141275
FCA_GND8103049_AGGGAGTTCATATCGG	0.0838044	0.0870122	0.0265074	0.080646	0.151289	0.129725	0.287337	0.0239375	0.0413141	0.0151044	0.00870003	0.00671838	0.0109506
FCA_GND8103049_AGGGATGAGAAGGACA	0.00205425	0.00193717	0.00329587	0.00293634	0.00140956	0.0112301	0.00213424	0.00594608	0.291476	0.0280172	0.00278037	0.000989922	0.00372847
FCA_GND8103049_AGGGATGAGACACGAC	0.00511918	0.00398111	0.00227978	0.00636313	0.0015816	0.00738266	0.00395737	0.0996033	0.712754	0.0159656	0.00174128	0.00187282	0.00711391
FCA_GND8103049_AGGGATGAGTGTTGAA	0.0145628	0.00909687	0.00733625	0.00963047	0.00287287	0.0526538	0.00904794	0.0485399	0.299383	0.0579778	0.00686928	0.00383527	0.0818429
FCA_GND8103049_AGGGATGCAAAGCGGT	0.0456775	0.0134486	0.0220663	0.0157009	0.00561532	0.193589	0.0451753	0.0226304	0.495242	0.00985321	0.00489719	0.0035139	0.00993194
FCA_GND8103049_AGGGATGCACTTAACG	0.0235501	0.0369056	0.029622	0.0302356	0.496384	0.139327	0.0956284	0.0136785	0.0462672	0.0118694	0.00592681	0.00652785	0.0188505
FCA_GND8103049_AGGGATGGTATATCCG	0.0203872	0.0184914	0.00917229	0.0233979	0.0906309	0.0513377	0.0439991	0.0106847	0.0236614	0.0126912	0.00617802	0.00369616	0.61931
FCA_GND8103049_AGGGATGTCATGTCTT	0.000260739	0.000606334	0.000872993	0.000707169	0.000979971	0.000281367	0.000320976	0.000587717	0.00117501	0.000939648	0.000892316	0.00135925	0.00034575
FCA_GND8103049_AGGGTGAAGATGTAAC	0.00921548	0.0122731	0.00812714	0.00827793	0.00393955	0.0263908	0.0130393	0.0508202	0.220306	0.0107545	0.00382072	0.00268662	0.00891563
FCA_GND8103049_AGGGTGAAGGTGATAT	0.00475947	0.0038231	0.00391028	0.0065905	0.00133196	0.00872118	0.00525398	0.0150936	0.767039	0.00765941	0.00152116	0.0016577	0.00209902
FCA_GND8103049_AGGGTGAAGTGGAGTC	0.133755	0.0752103	0.0198537	0.0504401	0.430205	0.0421245	0.0884374	0.017429	0.0273927	0.0158349	0.00828591	0.0165546	0.015897
FCA_GND8103049_AGGGTGATCAGTCCCT	0.0187028	0.0112552	0.00266133	0.0139486	0.000921016	0.00803728	0.00457252	0.00316803	0.00758552	0.00306603	0.0016693	0.00313522	0.904113
FCA_GND8103049_AGGGTGATCCGCAAGC	0.0179784	0.0089007	0.0147292	0.0116201	0.00494037	0.021193	0.00942299	0.0405248	0.629016	0.11185	0.00969778	0.00417569	0.00813028
FCA_GND8103049_AGGGTGATCCTTTCGG	0.157392	0.0670511	0.0232627	0.208196	0.00467508	0.170675	0.255978	0.00669701	0.0330338	0.00596714	0.00514255	0.00477453	0.00793328
FCA_GND8103049_AGGTCATAGCGTCAAG	0.00739679	0.00743001	0.00405994	0.0068383	0.00165375	0.0119636	0.00871227	0.00506938	0.103469	0.00507074	0.00504735	0.00418055	0.784111
FCA_GND8103049_AGGTCATAGCTTCGCG	0.0436917	0.0211998	0.00736125	0.0284359	0.00190386	0.0610773	0.0173318	0.0234541	0.661812	0.0406076	0.00482914	0.00291438	0.00445199
FCA_GND8103049_AGGTCATCAGCCAATT	0.000456147	0.00126364	0.00315928	0.00119251	0.00128753	0.000211268	0.000400968	0.00029279	0.000497711	0.000509248	0.000957341	0.000948336	0.000336393
FCA_GND8103049_AGGTCATGTGTGACCC	0.00485076	0.00358335	0.00384695	0.00472356	0.0010238	0.0283179	0.00297027	0.00803372	0.855892	0.00560792	0.00233051	0.00157353	0.00118047
FCA_GND8103049_AGGTCATTCCCAGGTG	0.00974128	0.00895337	0.00992797	0.0124635	0.00356825	0.0218111	0.0103779	0.0868863	0.439272	0.282878	0.0127257	0.00391173	0.00613892
FCA_GND8103049_AGGTCATTCCTTTCGG	0.0112703	0.0163086	0.0053972	0.0109019	0.00178636	0.0752482	0.00777237	0.014034	0.247988	0.0313909	0.00721983	0.002379	0.00494702
FCA_GND8103049_AGGTCATTCTTCCTTC	0.0194928	0.0446374	0.0369932	0.0331877	0.590531	0.0602824	0.0635942	0.0123129	0.039221	0.00955766	0.0147367	0.00789229	0.0151279
FCA_GND8103049_AGGTCCGAGACCCACC	0.0280316	0.0283043	0.0182305	0.02322	0.00677932	0.0631611	0.0209391	0.0887709	0.172907	0.132052	0.120242	0.00664183	0.019875
FCA_GND8103049_AGGTCCGAGCTGATAA	0.0168556	0.00412722	0.00444026	0.012431	0.00175473	0.0311611	0.0208076	0.0132583	0.767373	0.00774122	0.00225297	0.00193736	0.00311593
FCA_GND8103049_AGGTCCGAGGATTCGG	0.0540313	0.0465824	0.0191858	0.0230095	0.397	0.156655	0.155611	0.0143476	0.0464712	0.0125193	0.00814535	0.00754388	0.0126921
FCA_GND8103049_AGGTCCGAGGGAAACA	0.191391	0.027298	0.0123493	0.215646	0.00822075	0.10793	0.277056	0.00767691	0.0162002	0.00712376	0.00718128	0.00646502	0.0103807
FCA_GND8103049_AGGTCCGCAACTGCTA	0.000929985	0.00301932	0.00812661	0.00227003	0.00528486	0.000705569	0.00125939	0.000637848	0.00162238	0.000875247	0.00262963	0.00355522	0.00185161
FCA_GND8103049_AGGTCCGCAATCTGCA	0.0309459	0.0467832	0.0178301	0.0161504	0.147315	0.466985	0.12314	0.0118536	0.0558121	0.0096545	0.00587725	0.00518699	0.0137841
FCA_GND8103049_AGGTCCGCATCACAAC	0.0206446	0.0176961	0.0071009	0.0161342	0.00344327	0.0458571	0.00843539	0.00273898	0.0111072	0.00228823	0.00310041	0.0036315	0.0509016
FCA_GND8103049_AGGTCCGGTCCTAGCG	0.191253	0.0373707	0.0137598	0.0358283	0.00326962	0.307701	0.019663	0.029454	0.284676	0.0135753	0.0040652	0.00291001	0.00803092
FCA_GND8103049_AGGTCCGGTGCACCAC	0.000806264	0.0018335	0.00327126	0.000816106	0.000577754	0.00435415	0.000850081	0.000353037	0.00151235	0.000731547	0.000442197	0.00139667	0.979443
FCA_GND8103049_AGGTCCGTCGCATGAT	0.00146029	0.00101257	0.000430074	0.00411075	0.000238576	0.00115617	0.000483764	0.000533406	0.000745328	0.000604518	0.000614299	0.000850093	0.984805
FCA_GND8103049_AGGTCCGTCTCGATGA	0.0445838	0.0300959	0.0236584	0.0582258	0.0104184	0.0495213	0.0174563	0.0240389	0.088477	0.00909161	0.0188789	0.00619194	0.118919
FCA_GND8103049_AGGTCCGTCTTCCTTC	0.00342563	0.00280818	0.00183933	0.0039809	0.00122922	0.012127	0.00525001	0.0483057	0.776895	0.0286421	0.0031431	0.00274111	0.00271113
FCA_GND8103049_AGGTCCGTCTTTAGGG	0.0231814	0.0367275	0.0119352	0.0138159	0.517028	0.188961	0.113442	0.010394	0.0243282	0.005642	0.00501793	0.00529889	0.0118858
FCA_GND8103049_AGTAGTCAGCACCGTC	0.00148756	0.00230319	0.00233212	0.00228452	0.00157132	0.110272	0.00489865	0.000846515	0.014464	0.000521672	0.00166542	0.00148303	0.00462673
FCA_GND8103049_AGTAGTCCAAGGGTCA	0.0178336	0.00753486	0.00616146	0.0110154	0.00290096	0.182656	0.0354681	0.0154883	0.19392	0.0043897	0.00646274	0.00385514	0.011783
FCA_GND8103049_AGTAGTCGTTGCGCAC	0.0905976	0.0382385	0.00972243	0.0425204	0.00430758	0.0673509	0.0136236	0.0105313	0.0292888	0.0104519	0.00533431	0.00492164	0.554905
FCA_GND8103049_AGTAGTCTCAGTTCGA	0.0275301	0.00666093	0.00754489	0.0112108	0.00189793	0.0118501	0.00569384	0.0114949	0.741902	0.00827311	0.00328388	0.00192126	0.00244723
FCA_GND8103049_AGTAGTCTCGAACTGT	0.0144559	0.0134798	0.006029	0.0217503	0.00219354	0.0314425	0.00828734	0.0227444	0.560672	0.0180064	0.0030964	0.00211002	0.00432634
FCA_GND8103049_AGTAGTCTCGTTGACA	0.0414196	0.0334644	0.0190586	0.0208915	0.575025	0.100319	0.0934446	0.0129449	0.0376034	0.00861571	0.00679619	0.00683163	0.00812329
FCA_GND8103049_AGTAGTCTCTTGGGTA	0.000436203	0.000522663	0.983753	0.00179103	0.00164714	0.000600323	0.00131522	0.000449801	0.000973979	0.000645993	0.00238775	0.00197899	0.00163424
FCA_GND8103049_AGTCTTTAGAATAGGG	0.00932779	0.0030506	0.0048127	0.00730843	0.0010017	0.0314353	0.00877662	0.0121413	0.834721	0.00966239	0.00229579	0.00172478	0.00415458
FCA_GND8103049_AGTCTTTAGTACCGGA	0.019871	0.0164451	0.00734588	0.0143101	0.00327797	0.0789723	0.00857311	0.0218109	0.074106	0.00755959	0.00953736	0.00485715	0.314147
FCA_GND8103049_AGTCTTTAGTGTCCAT	0.0021294	0.000784558	0.000968921	0.00123094	0.000243256	0.00153279	0.000593464	0.000692814	0.00120162	0.00111239	0.00252319	0.000779577	0.98059
FCA_GND8103049_AGTCTTTCAAAGGAAG	0.00338041	0.00230396	0.00187813	0.00393373	0.00171577	0.00394654	0.00188748	0.00154442	0.00445185	0.00430931	0.00177184	0.00136603	0.952226
FCA_GND8103049_AGTCTTTCACTCTGTC	0.0319316	0.0101408	0.00606991	0.016117	0.00284715	0.0449314	0.00913059	0.00923183	0.0546696	0.0107069	0.00615795	0.0047866	0.501753
FCA_GND8103049_AGTCTTTCATCCGCGA	0.00244949	0.00208898	0.00204808	0.00356458	0.00111923	0.0161196	0.00354523	0.0558206	0.840964	0.0114368	0.00680887	0.00201429	0.00266038
FCA_GND8103049_AGTCTTTGTCGAGTTT	0.00380172	0.00232698	0.000594876	0.00309786	0.000530272	0.0014765	0.00117025	0.00107958	0.00158708	0.00164752	0.000556709	0.00177755	0.973044
FCA_GND8103049_AGTCTTTGTTCGGCAC	0.00384502	0.00175599	0.00296018	0.00801701	0.000778834	0.00551137	0.00757038	0.103076	0.821203	0.00789383	0.00358034	0.00172486	0.00169639
FCA_GND8103049_AGTCTTTGTTCTGAAC	0.00419786	0.00213236	0.00581908	0.00253312	0.00192286	0.00762728	0.00344961	0.0330791	0.677981	0.0241783	0.00167394	0.00174412	0.00310482
FCA_GND8103049_AGTCTTTTCATCTGTT	0.0240944	0.012317	0.00700429	0.00634239	0.00284145	0.011184	0.00499256	0.181555	0.582034	0.0711686	0.0223559	0.00316951	0.00333777
FCA_GND8103049_AGTCTTTTCATGTCCC	0.0125778	0.0136079	0.0103242	0.0140084	0.737156	0.0383358	0.0972989	0.00861456	0.0165776	0.00784739	0.00599727	0.00555694	0.0146161
FCA_GND8103049_AGTCTTTTCCCGGATG	0.0174195	0.00610025	0.00758692	0.0102713	0.0018241	0.077067	0.0106373	0.00961193	0.284214	0.00925074	0.00338951	0.0032031	0.0152796
FCA_GND8103049_AGTCTTTTCGGAGGTA	0.00422682	0.00218581	0.000843319	0.0097595	0.00089291	0.00308475	0.0030744	0.00133467	0.00326588	0.00222279	0.00186163	0.0017793	0.958577
FCA_GND8103049_AGTCTTTTCTCTTATG	0.00154085	0.000417129	0.000856611	0.000963539	0.000420662	0.00311445	0.0020511	0.00854611	0.947661	0.0083669	0.00160171	0.000906028	0.000439408
FCA_GND8103049_AGTGAGGAGCCCAGCT	0.00895642	0.00567199	0.00185896	0.00795469	0.00049584	0.00587667	0.0024946	0.00164961	0.00462645	0.00201456	0.00160592	0.00121768	0.940051
FCA_GND8103049_AGTGAGGAGTACGTTC	0.0455797	0.0430626	0.0173672	0.0191197	0.333696	0.192546	0.18554	0.0201305	0.0487228	0.0134615	0.00737382	0.00636462	0.0151605
FCA_GND8103049_AGTGAGGCAAAGCGGT	0.00813604	0.0171525	0.0076486	0.0239889	0.0036225	0.229352	0.0455506	0.00449461	0.0204594	0.00387125	0.00786656	0.0022172	0.0308275
FCA_GND8103049_AGTGAGGGTTTGGCGC	0.000508732	0.000355363	0.000813275	0.000467361	0.000245903	0.00300161	0.00179842	0.0118233	0.970658	0.003117	0.000427368	0.00105239	0.000550329
FCA_GND8103049_AGTGGGAAGATGGGTC	0.0299661	0.0222061	0.013118	0.0633837	0.00922432	0.0623039	0.023459	0.0422966	0.183166	0.0376955	0.00888799	0.00543571	0.0141197
FCA_GND8103049_AGTGGGAAGCCAACAG	0.00241502	0.00163505	0.00142545	0.00296951	0.000679141	0.00929402	0.00188353	0.00634763	0.0368652	0.00551276	0.00442517	0.00142344	0.0935099
FCA_GND8103049_AGTGGGAAGCCTATGT	0.0586793	0.0618364	0.0495172	0.0223979	0.24318	0.265676	0.11826	0.00996803	0.0708115	0.0127587	0.00756882	0.00690172	0.0133941
FCA_GND8103049_AGTGGGAAGTCACGCC	0.0453118	0.0294574	0.00728618	0.0118525	0.00242912	0.0486193	0.0143248	0.0957234	0.587646	0.0197757	0.0158029	0.00691159	0.0263345
FCA_GND8103049_AGTGGGAAGTCGCCGT	0.0179791	0.0107216	0.0042709	0.028669	0.00314211	0.0406938	0.0114975	0.00575359	0.00864584	0.00347036	0.00305256	0.00361549	0.399283
FCA_GND8103049_AGTGGGAAGTGTTGAA	0.0203355	0.00413101	0.00486083	0.00712781	0.00219796	0.0359659	0.00863819	0.0242108	0.566486	0.00500878	0.00722409	0.00291363	0.00293207
FCA_GND8103049_AGTGGGACAAGGACTG	0.0157961	0.0104699	0.0043943	0.0154883	0.00300524	0.0710862	0.00723727	0.00580683	0.0151284	0.00463055	0.00494927	0.00381014	0.531749
FCA_GND8103049_AGTGGGACACTAGTAC	0.0197308	0.0278105	0.0217963	0.0158523	0.398487	0.220725	0.150027	0.0104783	0.0269107	0.00978668	0.00561571	0.00607496	0.0276749
FCA_GND8103049_AGTGGGACAGATTGCT	0.012282	0.010417	0.0155915	0.0134286	0.0059196	0.0239669	0.0116607	0.027336	0.126205	0.0486542	0.0160626	0.00491339	0.548201
FCA_GND8103049_AGTGGGACAGGTTTCA	0.000861671	0.00161294	0.00290081	0.00154077	0.00136372	0.000969251	0.000682054	0.000478587	0.000938506	0.000536756	0.00112513	0.000731349	0.00642236
FCA_GND8103049_AGTGGGACAGTGGGAT	0.00514422	0.00695301	0.00409304	0.00988317	0.00115055	0.0429067	0.00335252	0.00217261	0.0139575	0.00100161	0.00181823	0.00133274	0.00817871
FCA_GND8103049_AGTGGGATCAACGCTA	0.320768	0.109138	0.0155973	0.234257	0.0101741	0.0433741	0.131742	0.0150485	0.0253727	0.00631753	0.00721329	0.00693132	0.00880678
FCA_GND8103049_AGTGGGATCACGCGGT	0.0463122	0.0304726	0.0307802	0.0213009	0.388222	0.148639	0.124343	0.0137142	0.0802511	0.0128432	0.00688057	0.00853564	0.0270285
FCA_GND8103049_AGTGGGATCCTGTACC	0.0803894	0.0773368	0.0202449	0.0281118	0.152939	0.363938	0.0573141	0.0197331	0.0756971	0.0123611	0.00789511	0.00592784	0.0124243
FCA_GND8103049_AGTGTCAAGCCGATTT	0.0101196	0.018651	0.00826347	0.00938548	0.0148465	0.0125132	0.0116157	0.00548152	0.018551	0.00325566	0.00304465	0.00263324	0.00516489
FCA_GND8103049_AGTGTCAAGGCCATAG	0.00605386	0.00443283	0.00683142	0.005626	0.00412697	0.00867237	0.00706394	0.099473	0.713757	0.0488032	0.0124179	0.00578532	0.00525045
FCA_GND8103049_AGTGTCAAGGGTCGAT	0.00115747	0.00535176	0.0227518	0.00389623	0.00176635	0.000742961	0.00368598	0.000715034	0.0013591	0.000904717	0.00109356	0.00166936	0.000684595
FCA_GND8103049_AGTGTCACAATCCAAC	0.145269	0.0105067	0.00716081	0.267453	0.00448771	0.0346913	0.443399	0.00515955	0.0214259	0.0046558	0.00383247	0.00624925	0.0152295
FCA_GND8103049_AGTGTCACAGGCAGTA	0.0086383	0.00857602	0.00606254	0.0086738	0.00180782	0.0110758	0.00559835	0.0437483	0.640266	0.107223	0.00824186	0.00159149	0.00367293
FCA_GND8103049_AGTGTCAGTACCTACA	0.0154204	0.0165792	0.00563964	0.0168736	0.00188567	0.080102	0.0136596	0.0228002	0.593771	0.00679335	0.00349354	0.0020439	0.00334635
FCA_GND8103049_AGTGTCATCTGAAAGA	0.0122018	0.0137312	0.00566523	0.0216585	0.00328603	0.0237701	0.00917622	0.0037853	0.0114935	0.00265001	0.00309208	0.0028554	0.127222
FCA_GND8103049_AGTTGGTAGTTATCGC	0.0182712	0.0145237	0.0105436	0.0142889	0.0033463	0.0208064	0.00673135	0.009703	0.111615	0.0375821	0.00581223	0.00525673	0.0050448
FCA_GND8103049_AGTTGGTCAGACAAAT	0.736536	0.015837	0.00450347	0.0518898	0.00271488	0.0681504	0.0572781	0.00338213	0.00826455	0.00220009	0.00252685	0.00238215	0.00334224
FCA_GND8103049_AGTTGGTCAGGTGGAT	0.0298244	0.00385149	0.0016678	0.0186365	0.00223888	0.0172721	0.89384	0.00169106	0.00198718	0.00127717	0.00131926	0.0021173	0.0013313
FCA_GND8103049_AGTTGGTGTTTGACTG	0.432328	0.0219242	0.00966952	0.136133	0.0045959	0.0418164	0.217852	0.00946544	0.0198725	0.00472088	0.00605405	0.00439523	0.00850841
FCA_GND8103049_AGTTGGTTCCTCAACC	0.00718529	0.00560667	0.00260951	0.0105589	0.00181255	0.00682272	0.00271342	0.0126328	0.783286	0.0286044	0.00666313	0.00209895	0.00136966
FCA_GND8103049_AGTTGGTTCTACGAGT	0.109389	0.0257078	0.00915728	0.0527843	0.0037852	0.0982654	0.0187705	0.00928296	0.188011	0.0175166	0.0117146	0.00395984	0.0347089
FCA_GND8103049_ATAACGCAGGCTAGCA	0.0828258	0.0304011	0.0243745	0.0167649	0.0268111	0.468338	0.238007	0.00900465	0.0395934	0.00548815	0.00414678	0.00415891	0.010395
FCA_GND8103049_ATAACGCCACATCTTT	0.0197941	0.0113214	0.00999859	0.0209071	0.00465221	0.0691076	0.0160479	0.0228733	0.454517	0.0649727	0.159142	0.00440404	0.00985428
FCA_GND8103049_ATAACGCCAGTTCCCT	0.00820294	0.00542992	0.00475905	0.00437827	0.000734806	0.00906859	0.00450735	0.0329118	0.900864	0.00499883	0.0012921	0.00138254	0.00195166
FCA_GND8103049_ATAACGCCATGTCCTC	0.00754874	0.00816524	0.00579608	0.0171302	0.00210185	0.0238865	0.00454149	0.0188513	0.641412	0.0112846	0.00268181	0.00194267	0.00276644
FCA_GND8103049_ATAACGCGTGCCTGCA	0.0147499	0.0267743	0.0129338	0.0239913	0.00474931	0.0622402	0.0145158	0.126266	0.252838	0.328866	0.0774326	0.00454725	0.00563397
FCA_GND8103049_ATAACGCTCGCGTTTC	0.0572005	0.0373793	0.0210137	0.0182994	0.0401177	0.636721	0.0589775	0.0133349	0.0369622	0.014944	0.00539149	0.00431688	0.00901822
FCA_GND8103049_ATAAGAGAGTACGATA	0.0108369	0.00745605	0.00930438	0.0107631	0.0057545	0.594257	0.0954864	0.00420401	0.0169587	0.00378226	0.0044094	0.00380022	0.0162724
FCA_GND8103049_ATAAGAGCAACTTGAC	0.0427618	0.0474101	0.0197826	0.0380994	0.367417	0.216138	0.116192	0.0154635	0.0379233	0.0112586	0.00756198	0.00697169	0.0218492
FCA_GND8103049_ATAAGAGCAATCCGAT	0.00364901	0.00250145	0.00246869	0.00749008	0.00290293	0.0788405	0.0121008	0.000826818	0.00321171	0.000687299	0.00182369	0.00146873	0.0081563
FCA_GND8103049_ATAAGAGCACACAGAG	0.00983292	0.0202396	0.00668559	0.0143307	0.00237842	0.0142961	0.00910655	0.0461584	0.551931	0.179951	0.0576702	0.00274597	0.0040578
FCA_GND8103049_ATAAGAGCACGAGAGT	0.0218354	0.0265936	0.0238028	0.0147584	0.658093	0.0524582	0.101793	0.0116569	0.0203004	0.0069447	0.00713616	0.0065964	0.019323
FCA_GND8103049_ATAAGAGCACTCGACG	0.175867	0.0437513	0.0309691	0.0340829	0.00769097	0.277699	0.359164	0.00343889	0.0159766	0.00323356	0.00319333	0.00531304	0.00984237
FCA_GND8103049_ATAAGAGCATGCATGT	0.00979414	0.0107519	0.00427448	0.00966763	0.00248047	0.0223826	0.019143	0.0197143	0.432879	0.00888801	0.00251471	0.00334997	0.0025102
FCA_GND8103049_ATAAGAGGTATCGCAT	0.0075513	0.00439037	0.00155385	0.00956405	0.00109715	0.0162022	0.00411241	0.00255149	0.00704083	0.00431473	0.00236447	0.00159206	0.769304
FCA_GND8103049_ATAAGAGTCCTATGTT	0.0340498	0.0208328	0.0167866	0.0197523	0.546919	0.15477	0.058668	0.00982546	0.0394192	0.0114484	0.00497099	0.00646621	0.00947952
FCA_GND8103049_ATAGACCAGGCTCATT	0.00658635	0.00466194	0.00468751	0.0108427	0.00198143	0.00942133	0.00656	0.0801532	0.700957	0.121143	0.00359089	0.00189739	0.00727714
FCA_GND8103049_ATAGACCAGTGGGCTA	0.00411935	0.00581377	0.00926048	0.0133519	0.00417213	0.0538329	0.0134941	0.00182171	0.00935158	0.00147977	0.00241433	0.00180567	0.0150848
FCA_GND8103049_ATAGACCCAAAGCAAT	0.112045	0.0508773	0.0453204	0.0238135	0.284185	0.154255	0.100865	0.0261748	0.0661888	0.0180916	0.00903222	0.00837897	0.0247342
FCA_GND8103049_ATAGACCCAAGACACG	0.00247817	0.00664986	0.00714877	0.00346558	0.00987753	0.00166072	0.00169543	0.001197	0.00446427	0.00167799	0.00397698	0.00723323	0.00408495
FCA_GND8103049_ATAGACCCAAGCCATT	0.0297886	0.0285757	0.00584894	0.0462648	0.00355335	0.112722	0.0170079	0.0060853	0.0205337	0.00587411	0.0040173	0.00293463	0.0378661
FCA_GND8103049_ATAGACCCACCTATCC	0.0345009	0.0630923	0.0398248	0.0590589	0.00782928	0.107221	0.0358428	0.0319735	0.209918	0.0954218	0.0165726	0.00698985	0.0104737
FCA_GND8103049_ATAGACCCAGATGGGT	0.0139879	0.00955631	0.00515243	0.0118155	0.000973516	0.0454978	0.00687602	0.0344024	0.705022	0.0115028	0.00321859	0.00205754	0.00376655
FCA_GND8103049_ATAGACCGTGATGCCC	0.200888	0.0438993	0.0228378	0.0253137	0.0175508	0.268333	0.252534	0.00873649	0.0374923	0.00635825	0.00637281	0.00959819	0.0207848
FCA_GND8103049_ATAGACCGTGATGTCT	0.0037578	0.00337892	0.00164421	0.00472601	0.000975953	0.0474461	0.00284549	0.00507815	0.0173421	0.00246192	0.00159297	0.00120142	0.00612824
FCA_GND8103049_ATAGACCGTGGACGAT	0.39817	0.0153015	0.00516286	0.210098	0.00274185	0.0196661	0.27241	0.0045961	0.00729553	0.00260344	0.00353832	0.00551126	0.00248662
FCA_GND8103049_ATAGACCTCGCTTGTC	0.0392855	0.0128489	0.0105087	0.0217996	0.00625084	0.016384	0.012999	0.0164437	0.0213174	0.0272767	0.00796549	0.00494443	0.440141
FCA_GND8103049_ATAGACCTCTATCCTA	0.0160093	0.0109132	0.0125663	0.00557624	0.0047869	0.00873586	0.00522889	0.0935022	0.210648	0.562227	0.00824846	0.00637513	0.00540638
FCA_GND8103049_ATCACGAAGCTGTTCA	0.0156458	0.00839935	0.010945	0.0076763	0.00450454	0.0158506	0.0101841	0.0914317	0.600521	0.169858	0.00552721	0.00307935	0.00813737
FCA_GND8103049_ATCACGACAAGAGTCG	0.00930983	0.00288977	0.00104874	0.00327439	0.000480407	0.00367163	0.00114989	0.000832376	0.00217405	0.000915097	0.000682729	0.00158962	0.964582
FCA_GND8103049_ATCACGACAATCAGAA	0.00441783	0.0109497	0.00826854	0.00356361	0.838091	0.0461288	0.0375885	0.00378094	0.00886055	0.002831	0.00264218	0.0060978	0.0127895
FCA_GND8103049_ATCACGACAGTCACTA	0.0487921	0.0421962	0.0331093	0.0188618	0.296304	0.318556	0.0665855	0.0129125	0.0686811	0.0108074	0.00874962	0.00752977	0.0168454
FCA_GND8103049_ATCACGACATCGATGT	0.132931	0.0897727	0.0396257	0.0329064	0.180906	0.077632	0.241102	0.0305557	0.0512049	0.0243367	0.0110359	0.00878134	0.0130497
FCA_GND8103049_ATCACGACATTTCAGG	0.00534002	0.00296126	0.00217641	0.00564959	0.00125638	0.0115071	0.00285576	0.0102518	0.0138326	0.0107184	0.00690245	0.00222058	0.424396
FCA_GND8103049_ATCACGAGTAAGGATT	0.00339977	0.00224563	0.0105037	0.00390373	0.00385829	0.0364372	0.0110094	0.0370332	0.641837	0.0196242	0.0047862	0.00211573	0.00270643
FCA_GND8103049_ATCACGAGTAGCGTAG	0.00712944	0.00235188	0.00223297	0.00644654	0.0011166	0.00648048	0.0031656	0.00269131	0.00794983	0.00269487	0.00315008	0.00139652	0.938706
FCA_GND8103049_ATCACGATCCTATTCA	0.000169859	0.000171882	0.994207	0.000890807	0.000777298	8.63428e-05	0.000512594	0.000131052	0.000114992	0.000174447	0.00104422	0.000834252	0.000362978
FCA_GND8103049_ATCATCTAGACACGAC	0.0107031	0.00639426	0.00572975	0.0084097	0.00149677	0.00977864	0.0060664	0.0212857	0.768567	0.0658992	0.00327854	0.00172807	0.00202159
FCA_GND8103049_ATCATCTAGGCCCTCA	0.00720482	0.00515677	0.00398481	0.00715918	0.00127731	0.0114849	0.00767073	0.0143531	0.60201	0.0159571	0.015285	0.00174176	0.00171279
FCA_GND8103049_ATCATCTAGTCTCAAC	0.068215	0.0222131	0.00875926	0.0340147	0.0026015	0.110342	0.0239619	0.0136092	0.149374	0.010032	0.00756368	0.0039156	0.0604819
FCA_GND8103049_ATCATCTCAAATACAG	0.00259793	0.00792579	0.00534185	0.00505841	0.00562178	0.00213439	0.00309983	0.00183959	0.012097	0.00268675	0.00480736	0.0123069	0.00346443
FCA_GND8103049_ATCATCTCAGATGAGC	0.0429975	0.0501636	0.0286234	0.0160851	0.184901	0.43351	0.119793	0.00817999	0.0444269	0.00737318	0.00503547	0.00735821	0.0220236
FCA_GND8103049_ATCATCTCAGCGTAAG	0.0285237	0.0102674	0.00440176	0.0236282	0.00187005	0.00976044	0.00530783	0.0138403	0.0141961	0.0115388	0.0063037	0.00362787	0.813071
FCA_GND8103049_ATCATCTGTACAAGTA	0.0129408	0.0170608	0.0120573	0.0154252	0.0069369	0.0444176	0.0183421	0.108977	0.200695	0.362571	0.0250228	0.00818666	0.0109796
FCA_GND8103049_ATCATCTGTCATATGC	0.0423521	0.013952	0.00478345	0.0198978	0.00227363	0.116119	0.018331	0.0340367	0.581108	0.0109039	0.00348243	0.00356435	0.00723062
FCA_GND8103049_ATCATCTTCACTCTTA	0.091503	0.0185664	0.00913996	0.0973282	0.00441597	0.169747	0.0310158	0.00449869	0.00801281	0.00385915	0.00461389	0.0033228	0.0638509
FCA_GND8103049_ATCATCTTCCACGTGG	0.167668	0.0350245	0.0115263	0.0385395	0.00654054	0.40323	0.0161395	0.0113539	0.0374306	0.00823959	0.00538279	0.00785305	0.0322648
FCA_GND8103049_ATCATCTTCTGCTGTC	0.00231151	0.00294395	0.00150865	0.005869	0.000732394	0.00663988	0.00239151	0.0249161	0.71399	0.0352304	0.0121391	0.00117502	0.000936723
FCA_GND8103049_ATCATGGAGACACTAA	0.0190136	0.0146188	0.0127864	0.00947484	0.00385614	0.00708017	0.00700473	0.140785	0.21685	0.506765	0.00732197	0.00453499	0.00569041
FCA_GND8103049_ATCATGGCAAGTTAAG	0.0109855	0.00619878	0.00414414	0.0101102	0.00131904	0.0193625	0.00546513	0.0290629	0.807196	0.010974	0.00675266	0.00166231	0.00153197
FCA_GND8103049_ATCATGGCACGAGAGT	0.07488	0.0644028	0.027512	0.0315267	0.253353	0.170563	0.136965	0.0177407	0.0806926	0.00996595	0.00722147	0.0087232	0.014527
FCA_GND8103049_ATCATGGGTACTTAGC	0.083311	0.0312154	0.0406287	0.0258806	0.136425	0.246207	0.216077	0.0180184	0.0805517	0.0159231	0.00776537	0.00864644	0.0207385
FCA_GND8103049_ATCATGGGTTCTCATT	0.0148201	0.0210048	0.0112532	0.0159599	0.69404	0.0919347	0.0846803	0.00630836	0.0187021	0.00511367	0.00360761	0.00500834	0.00573327
FCA_GND8103049_ATCATGGTCGGTGTTA	0.0180455	0.0232546	0.0157373	0.0132125	0.743266	0.0293776	0.0733862	0.0114781	0.0192805	0.00755404	0.0065735	0.00595234	0.00774764
FCA_GND8103049_ATCCACCAGCCACGCT	0.475804	0.0336571	0.0388492	0.0894825	0.0121441	0.0340921	0.212796	0.00626735	0.0201875	0.00539329	0.00733216	0.0054973	0.0128173
FCA_GND8103049_ATCCACCAGGCGACAT	0.0599648	0.0918434	0.0286285	0.0584908	0.257553	0.113414	0.21388	0.0209382	0.0479149	0.0161283	0.00843536	0.0063393	0.0139818
FCA_GND8103049_ATCCACCCATTGCGGC	0.13028	0.0381977	0.0149261	0.0533422	0.00271718	0.296102	0.0326601	0.0335307	0.294442	0.0103786	0.00367927	0.00374677	0.0187181
FCA_GND8103049_ATCCACCTCACTCCTG	0.480826	0.029301	0.0144367	0.227098	0.00884813	0.0270103	0.140893	0.0067306	0.010919	0.00421528	0.00368499	0.00380262	0.00498534
FCA_GND8103049_ATCCGAAAGCTGTTCA	0.00444539	0.00598783	0.00329989	0.0108965	0.00100541	0.0305112	0.0102807	0.00898047	0.500262	0.0162619	0.00770766	0.00173741	0.00666681
FCA_GND8103049_ATCCGAACAAACCTAC	0.000849286	0.000371787	0.000358405	0.00075411	0.000209119	0.000681931	0.000289928	0.000442303	0.000447645	0.00086805	0.00044116	0.000945949	0.991189
FCA_GND8103049_ATCCGAACAGCCTTTC	0.0378829	0.0303772	0.0259031	0.0379516	0.0167829	0.0360582	0.0392032	0.260467	0.208941	0.047523	0.0222394	0.00972256	0.0322316
FCA_GND8103049_ATCCGAACAGGAACGT	0.00554908	0.00346961	0.00624583	0.00356589	0.00257786	0.00559385	0.00352914	0.151367	0.633104	0.155902	0.00398576	0.00228004	0.0025067
FCA_GND8103049_ATCCGAACAGGTGCCT	0.00298323	0.0032843	0.00312441	0.00541759	0.00153614	0.244988	0.0157286	0.0046949	0.0374859	0.00374071	0.00903792	0.0015863	0.010371
FCA_GND8103049_ATCCGAAGTTGTGGCC	0.0219808	0.0233348	0.0108676	0.0420621	0.341265	0.036284	0.435181	0.00966781	0.0104401	0.00546977	0.00528779	0.00504994	0.0229253
FCA_GND8103049_ATCCGAATCAAAGACA	0.145061	0.100595	0.0240436	0.0619387	0.207386	0.0986443	0.185122	0.0166347	0.0432226	0.0140233	0.0103567	0.021186	0.0194462
FCA_GND8103049_ATCCGAATCAATACCG	0.00344254	0.00319757	0.00387591	0.00582262	0.00377493	0.780555	0.0759311	0.0025607	0.00599332	0.00143039	0.00238016	0.00207072	0.00534294
FCA_GND8103049_ATCCGAATCTACTCAT	0.000194015	0.000189507	0.99327	0.00112681	0.000701798	0.000144827	0.000691578	0.000156597	0.000280756	0.000201054	0.000706841	0.00107897	0.000635242
FCA_GND8103049_ATCCGAATCTTCATGT	0.0797228	0.0453007	0.0288444	0.0843667	0.151391	0.0349039	0.448443	0.0133298	0.0251963	0.00820955	0.00608759	0.00655817	0.0249441
FCA_GND8103049_ATCGAGTAGCTGATAA	0.54361	0.104897	0.0378904	0.166118	0.00374356	0.0394254	0.0278704	0.00298218	0.00594054	0.0036512	0.00243965	0.00440945	0.0146833
FCA_GND8103049_ATCTACTAGATGCCTT	0.0971071	0.0918021	0.0172434	0.0822016	0.215873	0.148707	0.137017	0.0213936	0.0615863	0.0153473	0.00941331	0.00985345	0.0323578
FCA_GND8103049_ATCTACTAGCGATATA	0.0744092	0.0216505	0.0351434	0.0402058	0.334613	0.101612	0.149789	0.0223254	0.067679	0.0174711	0.0157423	0.0108846	0.0409906
FCA_GND8103049_ATCTACTAGTAGCCGA	0.0206144	0.0140681	0.0175889	0.0186035	0.00731342	0.0338201	0.0177682	0.0478598	0.419449	0.179905	0.0494856	0.00714526	0.010068
FCA_GND8103049_ATCTACTAGTGGGATC	0.0128589	0.0151073	0.0155836	0.0191461	0.00668297	0.027194	0.0136423	0.0315113	0.331814	0.160642	0.0124157	0.00553741	0.0142947
FCA_GND8103049_ATCTACTCACCTCGGA	0.0867182	0.0755813	0.0524116	0.0366813	0.183305	0.142633	0.256839	0.013789	0.0453184	0.016201	0.0091798	0.00835174	0.0204633
FCA_GND8103049_ATCTACTGTAAATGTG	0.00585535	0.00611512	0.00548364	0.0137408	0.00217428	0.0330865	0.00367819	0.0153824	0.133043	0.0163047	0.00481116	0.00224213	0.0096263
FCA_GND8103049_ATCTACTGTATAATGG	0.00648194	0.00586086	0.0061444	0.00637291	0.00330747	0.00924707	0.00569336	0.046578	0.69002	0.166468	0.0039692	0.00227266	0.00307199
FCA_GND8103049_ATCTACTGTCATGCCG	0.200211	0.0250177	0.0146319	0.108035	0.00847831	0.25515	0.130987	0.00875129	0.0627191	0.00724339	0.00648725	0.00768536	0.0142307
FCA_GND8103049_ATCTACTGTCGTGGCT	0.00794577	0.00590592	0.00658478	0.00919852	0.00424999	0.0808997	0.0067846	0.00573578	0.0538703	0.0073409	0.00427031	0.00194594	0.0228626
FCA_GND8103049_ATCTACTGTGAGGGAG	0.0688232	0.0209454	0.0129338	0.0171998	0.00400278	0.0365081	0.0328724	0.20005	0.395774	0.039086	0.00757872	0.00455432	0.0096345
FCA_GND8103049_ATCTACTTCCCAACGG	0.0545896	0.0332913	0.0260109	0.0446073	0.37104	0.204204	0.108837	0.0127955	0.0390762	0.0150604	0.00782577	0.00700568	0.023252
FCA_GND8103049_ATCTACTTCCGTAGTA	0.000226723	0.000480244	0.00216821	0.000535007	0.000421394	0.00012059	0.000151721	9.31301e-05	9.5359e-05	0.000164333	0.000257715	0.00112681	0.000142213
FCA_GND8103049_ATCTACTTCCTCATTA	0.263097	0.0447053	0.0171403	0.0407169	0.00657315	0.344032	0.100122	0.00614567	0.0542327	0.00601902	0.0046886	0.00473117	0.0140571
FCA_GND8103049_ATCTGCCAGATCCGAG	0.0103769	0.00595685	0.00694817	0.0301168	0.00686462	0.0718529	0.00869485	0.00192842	0.00780248	0.00198979	0.00161502	0.00250973	0.0130122
FCA_GND8103049_ATCTGCCAGATCGATA	0.00163378	0.00170975	0.00198579	0.00236853	0.00111167	0.0273746	0.00234374	0.00324148	0.0350085	0.0109331	0.00178385	0.00230414	0.00551067
FCA_GND8103049_ATCTGCCAGTACGCCC	0.0371926	0.0241592	0.00652895	0.0133371	0.00236864	0.0331712	0.00826507	0.0130595	0.0730696	0.010463	0.00761825	0.00507707	0.307722
FCA_GND8103049_ATCTGCCAGTGCCAGA	0.195376	0.0734818	0.0354784	0.0993754	0.0116468	0.0762201	0.0861679	0.0218413	0.0544072	0.0254571	0.0142689	0.00847312	0.168308
FCA_GND8103049_ATCTGCCCAGTCACTA	0.0101058	0.004712	0.00648041	0.00651703	0.00250106	0.0120558	0.00789377	0.0754654	0.595867	0.112102	0.0169493	0.00319161	0.00387068
FCA_GND8103049_ATCTGCCCATCTGGTA	0.0532093	0.0174424	0.00812352	0.0216727	0.00281343	0.0707862	0.0111927	0.0127015	0.0773502	0.0121595	0.00638297	0.00496222	0.0888865
FCA_GND8103049_ATCTGCCCATGTTCCC	0.00822129	0.00870899	0.0533492	0.00619138	0.00156071	0.0330491	0.0104376	0.00198998	0.0149412	0.00340391	0.0016066	0.00234286	0.835833
FCA_GND8103049_ATCTGCCTCCGTCATC	0.0188141	0.0107352	0.00768624	0.0164102	0.00257653	0.128848	0.0206668	0.0192434	0.236157	0.00805039	0.00833028	0.0021636	0.00381163
FCA_GND8103049_ATCTGCCTCTACTCAT	0.0160576	0.0172856	0.0104357	0.00921625	0.00633775	0.0412614	0.0119496	0.00807175	0.0413348	0.0153308	0.0116922	0.00610332	0.759847
FCA_GND8103049_ATGAGGGCAGGTGGAT	0.148557	0.0391337	0.0242975	0.030338	0.00960691	0.295189	0.316385	0.0114129	0.0484903	0.00686455	0.0101944	0.00539871	0.0186911
FCA_GND8103049_ATGAGGGGTAAACCTC	0.00336474	0.00300709	0.00170962	0.00294816	0.00101907	0.028271	0.00326902	0.0227565	0.228323	0.00806501	0.00234509	0.0013631	0.0072433
FCA_GND8103049_ATGAGGGTCAATCTCT	0.022192	0.00948814	0.00955293	0.0203458	0.00287325	0.017536	0.00730604	0.0327296	0.363839	0.119577	0.00573423	0.00268764	0.00318821
FCA_GND8103049_ATGAGGGTCACTTCAT	0.0450837	0.0489825	0.0175908	0.0216997	0.284665	0.301087	0.0555004	0.0202922	0.0826666	0.0109537	0.00663107	0.00733983	0.0170873
FCA_GND8103049_ATGAGGGTCATCACCC	0.0854907	0.0537917	0.0238035	0.0436903	0.0158791	0.0893766	0.566291	0.00763353	0.0203253	0.00455373	0.00613838	0.00855911	0.0153109
FCA_GND8103049_ATGAGGGTCGGCGGTT	0.00604167	0.0033809	0.00242816	0.00223851	0.00168679	0.00285286	0.00259277	0.0421067	0.847409	0.0175589	0.00144158	0.00143345	0.00284992
FCA_GND8103049_ATGCGATAGGCCCTCA	0.0542444	0.0164151	0.023912	0.0374764	0.00522959	0.23279	0.038856	0.00455697	0.0689898	0.00440167	0.00391555	0.00350444	0.0177639
FCA_GND8103049_ATGCGATCACGGTGTC	0.0116906	0.0120511	0.0135558	0.0140239	0.00411564	0.0311765	0.00752853	0.0212663	0.0921526	0.0538025	0.0341763	0.00436569	0.0238847
FCA_GND8103049_ATGCGATCACTCAGGC	0.00666982	0.00296873	0.000864401	0.0042486	0.000255802	0.00242527	0.00189481	0.000821911	0.00188156	0.000913836	0.000977374	0.00178329	0.967848
FCA_GND8103049_ATGCGATCAGTCAGAG	0.00531766	0.00393421	0.00214583	0.0065886	0.00120744	0.0244806	0.0042278	0.00585229	0.0887986	0.0049761	0.00253215	0.00181828	0.0485285
FCA_GND8103049_ATGCGATGTAGTGAAT	0.00261078	0.00293422	0.00363723	0.0033642	0.00144511	0.00878025	0.00441463	0.0243672	0.7786	0.0125333	0.00306144	0.00164829	0.00163791
FCA_GND8103049_ATGCGATGTCACCCAG	0.00225006	0.00177665	0.00309667	0.00290192	0.00136477	0.00516296	0.001888	0.106234	0.770747	0.00668075	0.00253083	0.00120419	0.00673817
FCA_GND8103049_ATGCGATGTGTTTGTG	0.0105553	0.0425113	0.00597248	0.00370018	0.00291952	0.00451881	0.00346067	0.00249759	0.0184954	0.00318995	0.00250175	0.888425	0.00437886
FCA_GND8103049_ATGCGATGTTGAACTC	0.0369946	0.0344077	0.024155	0.0175247	0.0116845	0.0854957	0.0300671	0.01645	0.0853214	0.0245744	0.0138209	0.00855737	0.509975
FCA_GND8103049_ATGCGATTCCGCGGTA	0.00592842	0.00377593	0.00369659	0.00347066	0.0013724	0.0077586	0.0035444	0.0211781	0.706022	0.0333808	0.00217561	0.00221336	0.00138798
FCA_GND8103049_ATGCGATTCTCCGGTT	0.000378268	0.000466936	0.985152	0.0014862	0.00198691	0.00038079	0.00111378	0.000372428	0.000640706	0.000547982	0.0020943	0.00200977	0.00149095
FCA_GND8103049_ATGGGAGAGGCCCTCA	0.0176814	0.0373083	0.0130017	0.0506595	0.502998	0.12501	0.0758388	0.0135039	0.0449832	0.00758017	0.00822208	0.00600599	0.028419
FCA_GND8103049_ATGGGAGAGTGAACAT	0.100497	0.0191376	0.00935773	0.0562335	0.0649657	0.0799376	0.510445	0.00968119	0.0365605	0.00611438	0.00577972	0.0071164	0.0438342
FCA_GND8103049_ATGGGAGGTAAACGCG	0.0950678	0.0573371	0.0148247	0.0566071	0.00546991	0.140648	0.0170512	0.0389183	0.206882	0.0156055	0.00524762	0.00386844	0.0171046
FCA_GND8103049_ATGGGAGGTCAACATC	0.0283045	0.021725	0.0258868	0.0299755	0.0108584	0.0415893	0.0293538	0.0445006	0.15986	0.305362	0.0876998	0.0125354	0.0181777
FCA_GND8103049_ATGGGAGGTGTTTGTG	0.00437899	0.00702687	0.00207309	0.0110727	0.00215278	0.0156833	0.00400395	0.00849724	0.0381929	0.00290219	0.00305697	0.00181698	0.0193936
FCA_GND8103049_ATGGGAGTCATAGCAC	0.0159201	0.00414438	0.00297918	0.00549578	0.00105904	0.0466075	0.00432445	0.0108864	0.558458	0.00726044	0.0028705	0.00153921	0.00480583
FCA_GND8103049_ATGTGTGAGACTTTCG	0.00624258	0.00567777	0.00300078	0.00846239	0.00219483	0.0431778	0.00345824	0.00607572	0.0533903	0.00294545	0.00219145	0.00267741	0.123081
FCA_GND8103049_ATGTGTGCAGGACCCT	0.00554587	0.00434467	0.00564392	0.00667809	0.00247263	0.0189067	0.00553345	0.0361762	0.724294	0.0600982	0.00542582	0.00203031	0.00477449
FCA_GND8103049_ATGTGTGCATCCCATC	0.00999381	0.00851944	0.0190235	0.0113057	0.00970233	0.0333381	0.0106221	0.024993	0.446656	0.0837349	0.00874571	0.00242037	0.00921472
FCA_GND8103049_ATGTGTGCATCCGGGT	0.00441058	0.0032183	0.00154005	0.00661113	0.000444234	0.00351984	0.00170555	0.000777106	0.0020029	0.00148767	0.000726595	0.000732668	0.963989
FCA_GND8103049_ATGTGTGGTCGTGGCT	0.0175971	0.0116011	0.010266	0.0126563	0.00328185	0.0184409	0.0094997	0.0425587	0.649091	0.12409	0.00448182	0.00302329	0.00623636
FCA_GND8103049_ATGTGTGGTGTGCGTC	0.0307881	0.797503	0.013593	0.0428014	0.00202736	0.00996803	0.00975234	0.00222845	0.00727752	0.00322312	0.00205036	0.00473393	0.00387727
FCA_GND8103049_ATTACTCAGACTAGGC	0.105129	0.0566522	0.0200618	0.0436209	0.00968698	0.0937557	0.0454582	0.0441093	0.0853364	0.0275218	0.00848845	0.00697469	0.332822
FCA_GND8103049_ATTACTCAGACTGGGT	0.63514	0.0466608	0.0372273	0.0975318	0.00352213	0.0402308	0.0719826	0.00568548	0.0140786	0.00621993	0.00396975	0.00384359	0.00489472
FCA_GND8103049_ATTACTCAGATATGGT	0.0189607	0.0112673	0.012254	0.0135481	0.00781348	0.020439	0.0127301	0.114192	0.241829	0.36448	0.0116679	0.00640474	0.0117672
FCA_GND8103049_ATTACTCAGCGATTCT	0.0192456	0.00780401	0.00217446	0.0132073	0.00159137	0.00398349	0.00495292	0.00162495	0.0050868	0.00260815	0.00179935	0.00185491	0.918871
FCA_GND8103049_ATTACTCCAAGCGAGT	0.0170493	0.00853509	0.00349479	0.00928835	0.00113609	0.0152276	0.00819801	0.0585332	0.722789	0.00454533	0.00184198	0.00217973	0.00529199
FCA_GND8103049_ATTACTCGTCGGCTCA	0.276313	0.0821709	0.0352342	0.0304176	0.0629904	0.1982	0.141956	0.0168372	0.0605888	0.011927	0.00707998	0.00732247	0.0158019
FCA_GND8103049_ATTACTCGTGTAAGTA	0.0175845	0.00278277	0.00167663	0.0430588	0.00106221	0.00414765	0.913439	0.00162902	0.000964815	0.000900386	0.00147485	0.0014066	0.000639395
FCA_GND8103049_ATTACTCTCATTATCC	0.25853	0.06045	0.0388666	0.0211039	0.0764793	0.289894	0.0646154	0.0175566	0.0546353	0.0104298	0.00744506	0.00839756	0.024857
FCA_GND8103049_ATTATCCAGACCTAGG	0.0396334	0.0700855	0.0341249	0.0171445	0.336009	0.186334	0.0497128	0.0218956	0.0851583	0.00989674	0.00967154	0.00814675	0.0238472
FCA_GND8103049_ATTATCCAGATACACA	0.00481094	0.00618827	0.00505331	0.00745103	0.00253892	0.0115615	0.00578725	0.0469685	0.454956	0.282236	0.0131957	0.00203306	0.00460916
FCA_GND8103049_ATTATCCAGATCCCGC	0.0849759	0.0480688	0.0227742	0.0362108	0.0162653	0.210146	0.456875	0.00739578	0.032134	0.00487988	0.00534481	0.00884401	0.0191824
FCA_GND8103049_ATTATCCCAGGAATCG	0.0451237	0.0111241	0.00417598	0.0289738	0.00578098	0.0130979	0.0179632	0.00620836	0.0126576	0.0121456	0.00501995	0.00291008	0.755363
FCA_GND8103049_ATTATCCCATTCTCAT	0.0612266	0.0750804	0.0178637	0.0329384	0.398482	0.0940978	0.143942	0.0269557	0.0585251	0.0120558	0.00864481	0.00870264	0.0110809
FCA_GND8103049_ATTATCCGTAACGCGA	0.0398239	0.0540022	0.0240239	0.0238441	0.173596	0.333753	0.0848715	0.0136237	0.0706728	0.0106769	0.0075853	0.00570381	0.0138385
FCA_GND8103049_ATTATCCGTAGAGTGC	0.0233797	0.0268364	0.00417421	0.0209585	0.00351571	0.0118908	0.0144352	0.0109331	0.0211084	0.00820801	0.00540323	0.00520343	0.778835
FCA_GND8103049_ATTATCCTCAAACCGT	0.00310506	0.0187486	0.0830537	0.0170542	0.00253054	0.0022251	0.0119516	0.00108824	0.00151593	0.00147899	0.00159402	0.00177648	0.00232548
FCA_GND8103049_ATTATCCTCCATGCTC	0.00383312	0.00394286	0.00358574	0.00331487	0.00264599	0.0140216	0.00617927	0.0484688	0.576402	0.0534603	0.0338893	0.00190456	0.00301599
FCA_GND8103049_ATTCTACAGTTAACGA	0.763333	0.0156816	0.00439875	0.0493174	0.00120848	0.0232878	0.0915537	0.00279066	0.00634466	0.00174195	0.00181028	0.00231842	0.00359304
FCA_GND8103049_ATTCTACGTAAATGAC	0.0860954	0.0826303	0.0187711	0.0376238	0.274012	0.145769	0.102464	0.0321768	0.0672811	0.0147248	0.0094086	0.00847998	0.0183214
FCA_GND8103049_ATTCTACGTATCAGTC	0.00317123	0.00337593	0.00608456	0.00186643	0.00212857	0.0186319	0.00307751	0.00566142	0.835964	0.00456435	0.002366	0.00210583	0.00838709
FCA_GND8103049_ATTCTACTCAGCGACC	0.0130632	0.011068	0.00753628	0.0104248	0.00248784	0.0168234	0.0104761	0.119467	0.699805	0.0427845	0.00518898	0.00258817	0.00422218
FCA_GND8103049_ATTCTACTCATGTCTT	0.0183028	0.0104037	0.0141806	0.0121137	0.00681943	0.0332437	0.0382087	0.0465303	0.560892	0.101891	0.0193794	0.00784013	0.0214579
FCA_GND8103049_ATTCTACTCGACAGCC	0.096167	0.0558672	0.0220051	0.0174642	0.167913	0.334211	0.107951	0.014338	0.056399	0.0112436	0.00761914	0.00781928	0.0301077
FCA_GND8103049_ATTCTACTCTGTCTCG	0.014075	0.00655019	0.00207035	0.0266177	0.00223376	0.00811883	0.005704	0.00887456	0.0214901	0.00832976	0.00399377	0.0038122	0.62104
FCA_GND8103049_ATTCTACTCTTGACGA	0.0726685	0.00916166	0.0114917	0.0180029	0.00820109	0.0379834	0.00871675	0.00716565	0.0403705	0.00661	0.0104197	0.00471655	0.694368
FCA_GND8103049_ATTCTACTCTTGTTTG	0.0298738	0.0193864	0.0172244	0.0231469	0.00503485	0.0436555	0.0122149	0.0354876	0.363235	0.17939	0.00743485	0.00369681	0.00746601
FCA_GND8103049_ATTGGACAGAGTGACC	0.042686	0.0493936	0.0166018	0.0145973	0.110037	0.462142	0.196871	0.00772396	0.0341405	0.00733689	0.0041449	0.00461569	0.0127722
FCA_GND8103049_ATTGGACCACAACGTT	0.162948	0.0747973	0.0177327	0.0228987	0.0949878	0.276359	0.151139	0.025927	0.0616375	0.0146446	0.00694869	0.0062714	0.0168783
FCA_GND8103049_ATTGGACCAGGGCATA	0.024766	0.0193691	0.0128172	0.026643	0.00453863	0.12994	0.0447105	0.0401214	0.385952	0.0142734	0.0073326	0.00329525	0.00730462
FCA_GND8103049_ATTGGACCATAAAGGT	0.115555	0.0321458	0.00891625	0.0280459	0.00394052	0.0552492	0.0207923	0.0433085	0.417269	0.0397527	0.0048265	0.00492466	0.00891684
FCA_GND8103049_ATTGGACGTCCCGACA	0.140912	0.0482813	0.0185571	0.0255988	0.00504003	0.184968	0.0202915	0.0396301	0.338818	0.021203	0.0824248	0.00483193	0.0111189
FCA_GND8103049_ATTGGACGTTCGTTGA	0.0083523	0.00761679	0.0111365	0.0111672	0.0043884	0.0173286	0.011026	0.113657	0.473815	0.171461	0.0133034	0.00315707	0.00529952
FCA_GND8103049_ATTGGACTCCCGGATG	0.275772	0.0257723	0.0195986	0.0547348	0.0129836	0.0951619	0.314032	0.00890873	0.0513923	0.00768814	0.00831821	0.00904514	0.0148045
FCA_GND8103049_ATTGGACTCGAATCCA	0.0382652	0.0208347	0.00576094	0.0372545	0.00273505	0.0951176	0.0310337	0.0126487	0.095208	0.0104852	0.0088561	0.00455396	0.119203
FCA_GND8103049_ATTGGACTCGGAATCT	0.00462712	0.00338352	0.00916193	0.00552313	0.00533891	0.0154783	0.00758769	0.174825	0.630656	0.0557724	0.0119154	0.00138101	0.003526
FCA_GND8103049_ATTGGTGAGCGATTCT	0.0102078	0.0120066	0.01746	0.00752079	0.00306737	0.0247723	0.00753277	0.0054556	0.0228458	0.00678102	0.00569548	0.00378021	0.83471
FCA_GND8103049_ATTGGTGGTAAATACG	0.0740241	0.0579142	0.0335242	0.0224019	0.153301	0.306603	0.0701356	0.0200118	0.102563	0.013267	0.00896686	0.00698078	0.016956
FCA_GND8103049_ATTGGTGGTGCAGTAG	0.00196226	0.00704489	0.00105508	0.0072139	0.000635764	0.0335618	0.00492886	0.00244653	0.168171	0.00182907	0.00203689	0.00147629	0.0023437
FCA_GND8103049_ATTGGTGTCAGAGCTT	0.00437671	0.00175897	0.00293074	0.0040316	0.00216867	0.01022	0.00572889	0.00882123	0.549285	0.03176	0.0376373	0.00200356	0.00295577
FCA_GND8103049_ATTGGTGTCAGCCTAA	0.252518	0.0255869	0.0119669	0.203006	0.0118474	0.143199	0.206074	0.00711551	0.0154477	0.00661473	0.00582363	0.00618667	0.0123856
FCA_GND8103049_ATTGGTGTCATCTGCC	0.0199072	0.0291951	0.0198247	0.0392455	0.123491	0.291188	0.202214	0.0178202	0.0939579	0.0126169	0.00622646	0.00569202	0.0235838
FCA_GND8103049_ATTGGTGTCGCAAGCC	0.0095131	0.0110845	0.00610536	0.0135433	0.00202208	0.0196157	0.0107654	0.0379179	0.60703	0.0835675	0.00759419	0.0024743	0.0026754
FCA_GND8103049_ATTTCTGAGGACAGCT	0.0353915	0.0252258	0.018291	0.0349011	0.23671	0.0811337	0.414532	0.0162884	0.0214378	0.0132523	0.00986045	0.00514003	0.0446662
FCA_GND8103049_ATTTCTGCAAAGTCAA	0.00353775	0.00396052	0.00439014	0.00693317	0.00198145	0.0131576	0.00313067	0.00314125	0.226552	0.0316371	0.00168083	0.00242331	0.00467988
FCA_GND8103049_ATTTCTGCACCATGTA	0.0217223	0.0107192	0.00551597	0.0108681	0.00298791	0.0805241	0.0139608	0.00258416	0.00646874	0.00185481	0.00219431	0.00241131	0.194378
FCA_GND8103049_ATTTCTGCACTGCCAG	0.0144598	0.0149873	0.00575024	0.0285457	0.00491096	0.0979912	0.00952473	0.00343883	0.0081394	0.00274658	0.00278197	0.00275168	0.0267964
FCA_GND8103049_ATTTCTGGTCACTTCC	0.0285524	0.024727	0.0198588	0.0293854	0.00813754	0.0401703	0.0224039	0.0548407	0.246701	0.251224	0.0140866	0.00820788	0.0129313
FCA_GND8103049_ATTTCTGGTCAGAGGT	0.0138116	0.0194893	0.0252172	0.0104735	0.625286	0.125312	0.0260219	0.0123371	0.0581127	0.00941767	0.00779847	0.00607211	0.0152542
FCA_GND8103049_ATTTCTGGTCCAGTGC	0.302039	0.0362215	0.0163319	0.0524271	0.0153358	0.117639	0.2967	0.0092008	0.04695	0.00686263	0.00622394	0.00712287	0.00852641
FCA_GND8103049_ATTTCTGGTCCTCCAT	0.00730443	0.00576191	0.00462111	0.00836385	0.0025058	0.0196149	0.00643771	0.0409746	0.566306	0.111349	0.0171988	0.00225112	0.00239259
FCA_GND8103049_ATTTCTGGTCGAGATG	0.0185793	0.0117208	0.00758363	0.0232759	0.00378748	0.151579	0.00759655	0.0148241	0.113339	0.0141414	0.00589375	0.00243267	0.00844689
FCA_GND8103049_ATTTCTGGTCTGCGGT	0.00288126	0.00145302	0.00127141	0.00234645	0.00101176	0.00511186	0.00312216	0.00837507	0.757241	0.00993733	0.00337405	0.00225863	0.00166756
FCA_GND8103049_ATTTCTGGTGACAAAT	0.00342145	0.00415369	0.00212589	0.00568073	0.00120628	0.0225814	0.00867492	0.027211	0.609566	0.0301176	0.0295851	0.002101	0.00190686
FCA_GND8103049_ATTTCTGGTGCCTTGG	0.0139928	0.0135304	0.00651756	0.0184949	0.00296531	0.0479053	0.00949044	0.0237302	0.31395	0.0116687	0.00322247	0.00190808	0.00666673
FCA_GND8103049_ATTTCTGGTTCAGGCC	0.579683	0.0148823	0.0175791	0.0438832	0.0122872	0.0252358	0.0373535	0.0064309	0.0323776	0.00729735	0.0100424	0.0052539	0.146136
FCA_GND8103049_CAACCAAAGACGCAAC	0.00471175	0.00191243	0.00160064	0.00535997	0.00124325	0.00380681	0.00250741	0.0362069	0.890996	0.00776857	0.00241891	0.00343883	0.00176457
FCA_GND8103049_CAACCAAAGAGCCCAA	0.0751193	0.0269828	0.0122866	0.0361886	0.00351661	0.0626032	0.0210034	0.024175	0.497813	0.0456534	0.0058101	0.00396009	0.00583895
FCA_GND8103049_CAACCAAAGAGCTGCA	0.43004	0.0268109	0.015577	0.0576065	0.00730333	0.0216172	0.280645	0.008997	0.0255873	0.00585439	0.00640728	0.00602175	0.00452369
FCA_GND8103049_CAACCAAAGATCGATA	0.0612181	0.0429761	0.0100937	0.0125412	0.00695382	0.576748	0.0616557	0.00475255	0.0215453	0.00340051	0.00279786	0.00520707	0.0574575
FCA_GND8103049_CAACCAAAGGCAAAGA	0.0040724	0.00357646	0.00304812	0.00397952	0.00153276	0.00890095	0.00338467	0.00788391	0.144771	0.0172969	0.00875675	0.00137537	0.00245305
FCA_GND8103049_CAACCAACACCAGGTC	0.00458223	0.0033158	0.00449288	0.00406449	0.00165625	0.0395533	0.00475867	0.0428605	0.144581	0.0314024	0.0147649	0.00259057	0.0332385
FCA_GND8103049_CAACCAACAGCTGCAC	0.0151473	0.0307275	0.00475501	0.0166451	0.0018052	0.0375604	0.00722359	0.033566	0.443793	0.0721045	0.00898624	0.00304679	0.00413327
FCA_GND8103049_CAACCAAGTTATGTGC	0.0322839	0.00899262	0.0051111	0.0224374	0.00220805	0.0104969	0.0057336	0.00784339	0.0137611	0.0132902	0.00589804	0.00246467	0.824134
FCA_GND8103049_CAACCAATCAACCATG	0.00376463	0.00503155	0.00241029	0.00370729	0.0012611	0.0376752	0.00230949	0.00341218	0.00671985	0.00201307	0.00133512	0.00175428	0.166885
FCA_GND8103049_CAACCTCAGAGTTGGC	0.0319204	0.0113972	0.0145172	0.00644422	0.00328434	0.0168706	0.00660879	0.113853	0.671159	0.0652975	0.00360036	0.00224901	0.005928
FCA_GND8103049_CAACCTCAGCCTATGT	0.0652342	0.0281988	0.0416157	0.0208334	0.317901	0.176221	0.0863405	0.0179443	0.0649902	0.0157745	0.00788124	0.00827087	0.0210809
FCA_GND8103049_CAACCTCAGGAATTAC	0.142118	0.0538505	0.0141685	0.0370989	0.0070654	0.0706131	0.0274048	0.0503548	0.384639	0.0532034	0.00999273	0.0109776	0.0159972
FCA_GND8103049_CAACCTCAGGCGACAT	0.0841488	0.0711604	0.0201114	0.0576806	0.00810224	0.150387	0.020071	0.0127097	0.482685	0.0123275	0.00322597	0.00375478	0.00726962
FCA_GND8103049_CAACCTCCACCTTGTC	0.0362749	0.0155573	0.00867046	0.0246186	0.00591193	0.0221104	0.0434703	0.137808	0.415417	0.0345169	0.00682258	0.00326975	0.00705596
FCA_GND8103049_CAACCTCGTCCGTCAG	0.134627	0.0540507	0.0508385	0.0465753	0.0641586	0.241384	0.140435	0.0160852	0.0770766	0.0150298	0.0159663	0.00882453	0.0197447
FCA_GND8103049_CAACCTCGTTGGGACA	0.00248737	0.00316249	0.00209137	0.0049191	0.000863582	0.00960361	0.00266188	0.0705666	0.810715	0.0757991	0.00227468	0.00150826	0.00121747
FCA_GND8103049_CAACCTCTCCAAACTG	0.00326429	0.00395614	0.0019091	0.00361539	0.00101578	0.00332396	0.00322814	0.014916	0.929104	0.018263	0.000806893	0.0013219	0.00114566
FCA_GND8103049_CAACCTCTCCCTTGCA	0.0457207	0.0372117	0.0114559	0.0512204	0.0042971	0.117773	0.0304743	0.00936859	0.0360763	0.00893032	0.00976348	0.00589873	0.212852
FCA_GND8103049_CAACCTCTCTCGAGTA	0.00232533	0.00198501	0.00147626	0.00259123	0.000506178	0.0017635	0.00104955	0.000928369	0.00440269	0.0029624	0.0015567	0.00146117	0.967168
FCA_GND8103049_CAACCTCTCTGTTGAG	0.114847	0.0105166	0.0048352	0.0764765	0.00320707	0.0242216	0.716438	0.00315123	0.00961832	0.00216978	0.00203123	0.00313053	0.00260117
FCA_GND8103049_CAACTAGAGACTGTAA	0.00376868	0.00603736	0.00292895	0.0055314	0.00139197	0.0101437	0.00330376	0.0177139	0.814982	0.0478685	0.00262535	0.00116902	0.00167599
FCA_GND8103049_CAACTAGAGGCGACAT	0.144247	0.067975	0.0322498	0.0244158	0.221484	0.228292	0.0665229	0.0274889	0.0692997	0.0143822	0.0082142	0.00810488	0.0219489
FCA_GND8103049_CAACTAGAGTTACGGG	0.000938173	0.00066606	0.000384519	0.000902075	0.000174767	0.00123783	0.000388531	0.000424583	0.000648368	0.000408153	0.000583043	0.000939294	0.990323
FCA_GND8103049_CAACTAGCAGATGGGT	0.779231	0.0104284	0.0056045	0.0388802	0.00367143	0.0136847	0.0765993	0.00426607	0.00748732	0.00161738	0.00763451	0.00278988	0.0048177
FCA_GND8103049_CAACTAGTCAGGCGAA	0.0200822	0.0274666	0.00789038	0.0200478	0.00394691	0.0256193	0.0116306	0.038921	0.42965	0.180045	0.0164096	0.00535557	0.00647166
FCA_GND8103049_CAACTAGTCCACGAAT	0.007318	0.00428515	0.00440163	0.00588612	0.00150613	0.0218216	0.0117576	0.00458724	0.16073	0.0083098	0.0156466	0.00182973	0.00335017
FCA_GND8103049_CAAGAAAAGTGGCACA	0.0145187	0.00709129	0.01737	0.0186232	0.00252568	0.0710539	0.0190534	0.021084	0.371112	0.00882342	0.00591788	0.00293433	0.0296477
FCA_GND8103049_CAAGAAACACATTCGA	0.00675656	0.00598483	0.00472746	0.00961996	0.00148823	0.0126915	0.00513901	0.045928	0.537705	0.320762	0.00591005	0.00295861	0.00180334
FCA_GND8103049_CAAGAAACACGTTGGC	0.00418931	0.00285498	0.00322511	0.00505523	0.00169654	0.0406042	0.00416655	0.00196927	0.00669983	0.00366919	0.0023337	0.00162375	0.0748481
FCA_GND8103049_CAAGAAACAGCGTTCG	0.00607211	0.00500221	0.00255507	0.00458642	0.0027565	0.0108116	0.00658187	0.0344096	0.0208268	0.0105295	0.0070544	0.00354473	0.0590365
FCA_GND8103049_CAAGAAATCACGAAGG	0.00846867	0.00952011	0.00154292	0.0155204	0.00121087	0.00897538	0.00874179	0.00368211	0.00389683	0.00181485	0.00218588	0.00239332	0.919749
FCA_GND8103049_CAAGATCAGACAGACC	0.0660974	0.0319393	0.030723	0.0397137	0.00399577	0.167986	0.0390902	0.0330553	0.378712	0.0489299	0.00811688	0.00368085	0.00552074
FCA_GND8103049_CAAGATCAGCTGATAA	0.0149766	0.00339106	0.00294504	0.00659719	0.00185776	0.00624222	0.00348216	0.0320596	0.826512	0.0129156	0.00330097	0.00230452	0.00179465
FCA_GND8103049_CAAGATCAGGAGTCTG	0.0321698	0.042934	0.0281783	0.0206178	0.486892	0.0423965	0.239007	0.0104802	0.0247164	0.0096764	0.00577822	0.00700449	0.0100319
FCA_GND8103049_CAAGATCAGGATGTAT	0.0141204	0.0095344	0.00528427	0.0108461	0.00256073	0.0364587	0.00696596	0.0736019	0.499123	0.0141711	0.00342644	0.00230232	0.0116
FCA_GND8103049_CAAGATCCAAGGGTCA	0.0193266	0.0101087	0.010039	0.0145559	0.00521176	0.0150444	0.00865193	0.0355971	0.123569	0.099962	0.0241727	0.00587566	0.341709
FCA_GND8103049_CAAGATCGTCCGAGTC	0.0333265	0.0408259	0.024707	0.0327578	0.467196	0.0898805	0.140769	0.0254398	0.0609686	0.0130551	0.0124821	0.00741558	0.0153682
FCA_GND8103049_CAAGGCCAGATTACCC	0.0194579	0.00912742	0.00667814	0.0145789	0.00288986	0.0281763	0.0100279	0.0331003	0.535747	0.0885342	0.00696603	0.0024803	0.00347803
FCA_GND8103049_CAAGGCCAGCTAGTGG	0.015831	0.00628207	0.00517143	0.023612	0.00228986	0.0190434	0.00986171	0.0107243	0.0837344	0.014003	0.00642381	0.00429675	0.0726294
FCA_GND8103049_CAAGGCCAGCTATGCT	0.0191157	0.013113	0.0147209	0.0171654	0.00543446	0.029528	0.0175067	0.0219698	0.318264	0.15182	0.0202093	0.00556498	0.0108104
FCA_GND8103049_CAAGGCCAGTGGCACA	0.20558	0.0728297	0.0422006	0.0210945	0.117553	0.0963256	0.230795	0.0250149	0.0687646	0.0184806	0.00966427	0.0111936	0.0223811
FCA_GND8103049_CAAGGCCCAGGTTTCA	0.0428227	0.0389931	0.0182333	0.0245269	0.527353	0.105997	0.128131	0.0109305	0.0276395	0.00978885	0.00627724	0.00656115	0.00967861
FCA_GND8103049_CAAGGCCTCACAACGT	0.00926647	0.0131702	0.0100947	0.0141888	0.809905	0.0332658	0.0385828	0.00509454	0.0108482	0.00435402	0.00480197	0.00452519	0.0205559
FCA_GND8103049_CAAGGCCTCCAAGCCG	0.00985465	0.00482401	0.00186849	0.00711949	0.000546423	0.0055167	0.00177832	0.0022416	0.00564179	0.00337019	0.00255278	0.00151262	0.939475
FCA_GND8103049_CAAGTTGAGCCCAGCT	0.125211	0.0545082	0.0311346	0.0152829	0.073187	0.470911	0.0821813	0.0110267	0.0603727	0.0075477	0.00533579	0.00607152	0.010931
FCA_GND8103049_CAAGTTGAGTGCAAGC	0.0124489	0.00808458	0.00679784	0.0183114	0.00462974	0.0996653	0.00858164	0.00520345	0.0182219	0.00540211	0.00394065	0.00227223	0.0119395
FCA_GND8103049_CAAGTTGAGTGCTGCC	0.0825538	0.0301011	0.0110277	0.0566322	0.00192436	0.0252846	0.00984766	0.00625721	0.0287767	0.00569675	0.00384744	0.00336495	0.66794
FCA_GND8103049_CAAGTTGCACATCCGG	0.230879	0.0334296	0.00911376	0.160289	0.0136349	0.0386789	0.421863	0.00787846	0.0164113	0.00410034	0.00463899	0.0058527	0.00630648
FCA_GND8103049_CAAGTTGGTCATACTG	0.00770263	0.00591922	0.00678324	0.00496029	0.0026568	0.00510135	0.00333982	0.1284	0.718203	0.040906	0.00395031	0.00248607	0.00406429
FCA_GND8103049_CAAGTTGGTTGACGTT	0.0117392	0.00448438	0.00744178	0.00434818	0.00299825	0.00550633	0.00370444	0.250701	0.578834	0.0552626	0.00616919	0.00345889	0.00378696
FCA_GND8103049_CAAGTTGTCAAGGTAA	0.619197	0.0214771	0.0107872	0.0344868	0.00430509	0.118849	0.0947	0.00477277	0.0265131	0.002543	0.00301613	0.00364369	0.00830516
FCA_GND8103049_CAAGTTGTCCAGTAGT	0.0195875	0.00575108	0.00847475	0.0100238	0.00295594	0.0128685	0.00985862	0.187124	0.469561	0.161689	0.00640206	0.00308463	0.00430928
FCA_GND8103049_CAAGTTGTCCGCATCT	0.00941324	0.0195953	0.00626319	0.0151017	0.00305788	0.0214756	0.0077574	0.0179342	0.349068	0.0646786	0.0248653	0.00279818	0.00430614
FCA_GND8103049_CAAGTTGTCCGCGTTT	0.0621506	0.0172885	0.00628896	0.0291215	0.00332709	0.0265023	0.0113267	0.00883372	0.0196101	0.00992753	0.0077811	0.00666957	0.737474
FCA_GND8103049_CACAAACAGCGCCTTG	0.0090692	0.00799893	0.00584397	0.0183887	0.00217346	0.0489639	0.0068125	0.0176279	0.504962	0.0290729	0.0110435	0.00212045	0.00493929
FCA_GND8103049_CACAAACAGCGTCTAT	0.0151627	0.0175337	0.0139038	0.0123754	0.00346618	0.162317	0.0298664	0.0408964	0.51819	0.0624574	0.00905614	0.00379211	0.00552765
FCA_GND8103049_CACAAACGTAAACACA	0.00906304	0.00549376	0.00243107	0.0048155	0.00197178	0.11886	0.00245672	0.00163498	0.0036936	0.00102623	0.0015857	0.00171426	0.0356128
FCA_GND8103049_CACAAACGTCTCCATC	0.0420056	0.0179259	0.00663537	0.0279233	0.00387362	0.0331286	0.018448	0.0132991	0.031801	0.00759043	0.00720496	0.00478125	0.684878
FCA_GND8103049_CACAAACTCCGGGTGT	0.00121528	0.00149483	0.00206449	0.0024932	0.000740706	0.00592578	0.00181096	0.00619177	0.446135	0.0219116	0.00292102	0.000897503	0.00123364
FCA_GND8103049_CACACAAAGCTAGCCC	0.0141889	0.0169457	0.00450876	0.0219637	0.00316688	0.0325844	0.0110824	0.00859277	0.0262292	0.00756511	0.00702512	0.00305927	0.405388
FCA_GND8103049_CACACAACAATAAGCA	0.0194835	0.0208905	0.00684451	0.0188026	0.00256388	0.0227328	0.00876855	0.0150096	0.313131	0.0437232	0.0278219	0.00292688	0.00557851
FCA_GND8103049_CACACAAGTCTCACCT	0.0227403	0.027751	0.0172262	0.017307	0.724329	0.0486255	0.0501512	0.0108418	0.0238041	0.00681764	0.00576947	0.00583146	0.0115681
FCA_GND8103049_CACACAAGTGCCTGGT	0.00135749	0.00165691	0.00150064	0.00269818	0.00126984	0.0145036	0.00205939	0.00565402	0.0599475	0.00377922	0.00818438	0.0014092	0.0044656
FCA_GND8103049_CACACAAGTTCCGTCT	0.017847	0.0189491	0.0190051	0.0103163	0.677808	0.110388	0.0516061	0.00841453	0.0227135	0.00638826	0.00527853	0.00587921	0.012749
FCA_GND8103049_CACACCTAGAAGGCCT	0.00778122	0.00367713	0.222733	0.0143332	0.00105525	0.00568618	0.00689724	0.00113201	0.00295405	0.00129518	0.0011937	0.00174776	0.720057
FCA_GND8103049_CACACCTAGAGCTGGT	0.0456339	0.0480468	0.0246045	0.0304484	0.00440813	0.0474828	0.0166049	0.0440486	0.189215	0.280508	0.016048	0.00566362	0.0139214
FCA_GND8103049_CACACCTAGCCCAGCT	0.031067	0.0158643	0.013063	0.0245608	0.00834151	0.0332545	0.0146959	0.0995665	0.416818	0.143136	0.0291552	0.00653236	0.00893722
FCA_GND8103049_CACACCTAGCTAAGAT	0.0452828	0.0324183	0.0158437	0.0296932	0.00558904	0.135964	0.0176638	0.0304225	0.397553	0.0296297	0.0107732	0.00437587	0.0105048
FCA_GND8103049_CACACCTAGTACCGGA	0.000397283	0.00128578	0.0010493	0.00103033	0.00614813	0.00029322	0.000473701	0.000199653	0.000282741	0.000266025	0.000568234	0.000817884	0.00059419
FCA_GND8103049_CACACCTCAGACTCGC	0.00684799	0.00551242	0.00254397	0.00592285	0.00160492	0.010207	0.00389021	0.05143	0.846696	0.013443	0.00199531	0.00162675	0.0025986
FCA_GND8103049_CACACCTCAGGCAGTA	0.0189139	0.00700754	0.00170499	0.00748067	0.00111095	0.00535286	0.00390207	0.00177852	0.00423347	0.00231128	0.00121968	0.00199694	0.925477
FCA_GND8103049_CACACCTGTCTCTCTG	0.000539328	0.000713082	0.00737331	0.00133523	0.000485425	0.00387263	0.00136469	0.000202914	0.00104893	0.000468529	0.000602185	0.00122899	0.978524
FCA_GND8103049_CACACTCAGCCTATGT	0.0282425	0.00936851	0.00843091	0.0119909	0.0099155	0.00970858	0.00844339	0.576549	0.235608	0.0302198	0.00673022	0.0068729	0.00593334
FCA_GND8103049_CACACTCCAAGTACCT	0.0705827	0.0724248	0.0186709	0.014813	0.00437977	0.166428	0.0354662	0.0324746	0.416686	0.0126489	0.0283504	0.00920527	0.0349456
FCA_GND8103049_CACACTCCAATGGAGC	0.0145052	0.012095	0.0122599	0.0178648	0.00572852	0.0225978	0.0112278	0.0574629	0.446025	0.171606	0.0120438	0.00607725	0.0125868
FCA_GND8103049_CACACTCCAGGCGATA	0.00176194	0.00248427	0.00213795	0.00364387	0.00304969	0.122882	0.0215464	0.00157355	0.00429206	0.00110724	0.0015802	0.00215899	0.0197765
FCA_GND8103049_CACACTCGTTAAGGGC	0.0341274	0.015868	0.00869351	0.035486	0.00292384	0.0480952	0.0164076	0.00700465	0.0374599	0.00742695	0.00700659	0.00541313	0.627211
FCA_GND8103049_CACAGGCAGAGCAATT	0.0224243	0.027106	0.0141575	0.0271981	0.0115115	0.0386539	0.0253481	0.436951	0.162564	0.0331949	0.0239404	0.00662031	0.0157669
FCA_GND8103049_CACAGGCAGCGATATA	0.0646633	0.0453388	0.0311855	0.0181487	0.107072	0.415353	0.0748638	0.0233426	0.0643105	0.0109526	0.00843859	0.00664308	0.0318739
FCA_GND8103049_CACAGGCAGTGTTTGC	0.0712731	0.0182276	0.012672	0.0385571	0.00352812	0.136618	0.0332262	0.025049	0.183984	0.0223582	0.0431112	0.00481869	0.0175222
FCA_GND8103049_CACAGGCCACGAAAGC	0.0228058	0.0190555	0.0246874	0.0135071	0.63599	0.105979	0.0639272	0.0122917	0.0273058	0.00768044	0.00604924	0.00576774	0.0155012
FCA_GND8103049_CACAGGCCAGTACACT	0.184934	0.0254782	0.0185377	0.0343135	0.0161183	0.0664997	0.0313218	0.0130445	0.0517243	0.0252145	0.0119355	0.0109875	0.395627
FCA_GND8103049_CACAGGCGTGATGTGG	0.0239988	0.0211925	0.00635972	0.0268816	0.00269967	0.0515362	0.00984108	0.0199966	0.13333	0.00680812	0.00450887	0.00205853	0.0117924
FCA_GND8103049_CACAGGCGTGCGGTAA	0.00333348	0.00712908	0.00228328	0.00572936	0.00167122	0.0152217	0.00290107	0.00401105	0.0073045	0.00211423	0.00211186	0.00268495	0.373038
FCA_GND8103049_CACAGGCTCGGCCGAT	0.0264841	0.0187957	0.0133166	0.027176	0.00604686	0.038995	0.0167214	0.0755698	0.194252	0.17926	0.0202296	0.00579137	0.0114917
FCA_GND8103049_CACAGGCTCTGTCTCG	0.00848058	0.00939957	0.0111412	0.00665153	0.00291365	0.00620288	0.0059594	0.279528	0.478704	0.144043	0.00479659	0.00239602	0.00543411
FCA_GND8103049_CACAGTAAGAAGCCCA	0.00731917	0.00981763	0.00426824	0.00698075	0.00119093	0.0160153	0.00399766	0.0230331	0.572626	0.0438247	0.00335913	0.0014675	0.0060749
FCA_GND8103049_CACAGTAAGAGTGAGA	0.00417507	0.00542709	0.00754146	0.00711467	0.00189461	0.0194081	0.00376729	0.0134859	0.0470487	0.0591851	0.010564	0.00199441	0.0064297
FCA_GND8103049_CACAGTAGTGTGACGA	0.0068376	0.00553901	0.00474053	0.0091886	0.00281679	0.0351805	0.00806465	0.113779	0.607446	0.0367974	0.00277975	0.00285434	0.00640752
FCA_GND8103049_CACAGTATCTGCTTGC	0.0501086	0.0222482	0.0294212	0.0278123	0.419479	0.170253	0.110587	0.015652	0.0326386	0.0117059	0.00748728	0.00889452	0.0463207
FCA_GND8103049_CACATAGAGGGCTCTC	0.0188758	0.0213196	0.023516	0.039832	0.00707807	0.0416841	0.0239433	0.127479	0.266358	0.249465	0.0103418	0.00543117	0.0271434
FCA_GND8103049_CACATAGCATCCGGGT	0.00598441	0.0123838	0.00418481	0.00972008	0.00219019	0.0122923	0.00507689	0.0371661	0.488065	0.0371951	0.00440983	0.00217159	0.003878
FCA_GND8103049_CACATAGCATCTACGA	0.0119191	0.00703009	0.00512013	0.00897477	0.00443724	0.121779	0.0148324	0.00866476	0.0132731	0.00489921	0.00350002	0.00557505	0.21372
FCA_GND8103049_CACATAGGTGGTGTAG	0.0090909	0.00941829	0.00389452	0.0119451	0.00268258	0.186198	0.0172942	0.00190758	0.00602992	0.00106266	0.00256684	0.0014292	0.00877549
FCA_GND8103049_CACATAGTCACCGGGT	0.0559797	0.66428	0.0142857	0.037789	0.00316623	0.0404602	0.013372	0.00540962	0.0160013	0.00747391	0.00444696	0.00553473	0.00562652
FCA_GND8103049_CACATTTAGACGCTTT	0.17397	0.0152766	0.0213212	0.0187845	0.00729921	0.0694147	0.615165	0.00384253	0.0269995	0.00242493	0.00730437	0.00430805	0.00694225
FCA_GND8103049_CACATTTAGCACCGTC	0.40888	0.0498631	0.0149022	0.28037	0.00963373	0.0365036	0.085243	0.0116214	0.0182725	0.00569703	0.0054994	0.00641741	0.00790405
FCA_GND8103049_CACATTTAGCCAGGAT	0.00409273	0.00470665	0.0025402	0.00548498	0.00105042	0.0288878	0.00306228	0.0114568	0.164392	0.00827415	0.00323474	0.00158216	0.00329055
FCA_GND8103049_CACATTTAGCCCGAAA	0.00578822	0.00338154	0.00337303	0.00419373	0.00145655	0.012577	0.00738587	0.0080666	0.594147	0.0221226	0.0201211	0.00191628	0.00138676
FCA_GND8103049_CACATTTAGTCGAGTG	0.0347988	0.0458531	0.0151328	0.0338915	0.00486217	0.14402	0.0207822	0.0442929	0.398314	0.0873058	0.031726	0.00816791	0.0141526
FCA_GND8103049_CACATTTCACGGCCAT	0.0792945	0.0354122	0.0269086	0.0205097	0.210006	0.217397	0.0677008	0.0391487	0.123508	0.0292955	0.0138427	0.00826597	0.0182462
FCA_GND8103049_CACATTTGTGTGAATA	0.0264887	0.0342892	0.0335637	0.040987	0.353799	0.141774	0.204833	0.0167446	0.0556647	0.0161569	0.00765937	0.00671656	0.0122976
FCA_GND8103049_CACATTTTCATGTCTT	0.00745849	0.00582039	0.00628426	0.00939464	0.00395725	0.0111355	0.014836	0.143079	0.625502	0.0721033	0.00855506	0.00327237	0.00557043
FCA_GND8103049_CACATTTTCTGAAAGA	0.0449145	0.017192	0.00722791	0.0351617	0.00293183	0.0894231	0.0203335	0.0255952	0.213449	0.0117557	0.00564154	0.00277748	0.0134022
FCA_GND8103049_CACCACTAGAGCTTCT	0.0259103	0.0143522	0.0118053	0.021972	0.00562312	0.0475886	0.0156754	0.0305038	0.118426	0.0290464	0.110582	0.00705188	0.105938
FCA_GND8103049_CACCACTAGTCATGCT	0.0301513	0.0124096	0.00597851	0.0175128	0.0037428	0.111512	0.011737	0.0138297	0.116077	0.00984162	0.00267239	0.00223015	0.0195701
FCA_GND8103049_CACCACTCACATTCGA	0.0850385	0.0206125	0.0130324	0.0208771	0.00487468	0.0315249	0.0144768	0.0484246	0.595734	0.0373592	0.00976904	0.00498862	0.00574139
FCA_GND8103049_CACCACTCAGCTGTGC	0.0645406	0.0140051	0.014811	0.017799	0.00239719	0.0571874	0.00924184	0.0194163	0.543799	0.0277243	0.00737089	0.00261523	0.0057831
FCA_GND8103049_CACCACTGTAAACACA	0.100228	0.0150795	0.00756311	0.0301389	0.0040534	0.0432081	0.0200631	0.0327495	0.0553294	0.0131594	0.00973458	0.00674402	0.578132
FCA_GND8103049_CACCACTGTCCCTTGT	0.000924329	0.00119126	0.00079525	0.00222275	0.000407898	0.0118622	0.00103219	0.00175594	0.0127996	0.00189833	0.00524676	0.00128085	0.18018
FCA_GND8103049_CACCACTGTCCGACGT	0.0359884	0.0616406	0.0162751	0.030046	0.517848	0.10254	0.14085	0.0132252	0.0226632	0.00737061	0.00528236	0.00551996	0.00845837
FCA_GND8103049_CACCACTGTCCTCCAT	0.505276	0.0362137	0.0179058	0.0877695	0.00684009	0.123433	0.0942947	0.00597362	0.0354545	0.00427851	0.00368095	0.00441595	0.00933523
FCA_GND8103049_CACCACTGTCTCAACA	0.0297322	0.0319841	0.0155164	0.016327	0.444939	0.174233	0.196081	0.00933461	0.0233701	0.00730008	0.00556245	0.0053293	0.0113054
FCA_GND8103049_CACCACTTCCAACCAA	0.00233092	0.00327134	0.00160374	0.0039589	0.000933338	0.00719788	0.00196929	0.0530476	0.0802153	0.0122933	0.00485349	0.00153294	0.0231224
FCA_GND8103049_CACCACTTCCTATTCA	0.00870418	0.0140413	0.00372198	0.0190523	0.00124189	0.703528	0.0232999	0.00291985	0.011282	0.00395482	0.00241925	0.00289145	0.0034291
FCA_GND8103049_CACCACTTCGAATGGG	0.0144196	0.00906994	0.00885472	0.0152047	0.00853049	0.0170215	0.0122687	0.212678	0.332708	0.151388	0.0101687	0.00536126	0.00749577
FCA_GND8103049_CACCAGGAGGTTACCT	0.0151833	0.00462618	0.00645595	0.00638825	0.00327638	0.0299971	0.0096992	0.0525672	0.596193	0.0329441	0.00830912	0.00261883	0.0158007
FCA_GND8103049_CACCAGGCATTAGCCA	0.00877195	0.006648	0.00306722	0.0121139	0.00208708	0.0182734	0.00804538	0.00390293	0.00357962	0.00175973	0.00419031	0.00223205	0.333391
FCA_GND8103049_CACCAGGGTCGAGTTT	0.0483482	0.013595	0.0117998	0.0228858	0.00597032	0.676855	0.0231777	0.00455765	0.014358	0.00417886	0.00344076	0.0032492	0.0169936
FCA_GND8103049_CACCAGGGTCTGCCAG	0.184154	0.0112674	0.0104713	0.137599	0.00554265	0.0801971	0.490988	0.00405302	0.0147077	0.00327235	0.00268302	0.00425923	0.00870393
FCA_GND8103049_CACCAGGGTCTTTCAT	0.00684825	0.0043296	0.00432711	0.00547304	0.00147543	0.00984392	0.00378896	0.0315972	0.790233	0.0759475	0.00263343	0.002924	0.00232029
FCA_GND8103049_CACCAGGTCAGGTTCA	0.00102261	0.000655199	0.000391569	0.00121082	0.00018797	0.000761327	0.00035745	0.000548558	0.000693681	0.000541413	0.000552863	0.00109398	0.989426
FCA_GND8103049_CACCAGGTCTCTTATG	0.00242789	0.00284428	0.0022245	0.00399889	0.000443766	0.00528057	0.00435875	0.0180509	0.852276	0.00604707	0.00226567	0.00163095	0.00110072
FCA_GND8103049_CACCAGGTCTTGGGTA	0.0371746	0.0212147	0.00322822	0.0391984	0.00271115	0.0109005	0.00486008	0.00660914	0.00847068	0.00328858	0.0034303	0.00403735	0.375093
FCA_GND8103049_CACCTTGAGACACTAA	0.00261537	0.00194399	0.00260808	0.0036613	0.00151033	0.0171523	0.00237047	0.0129974	0.422817	0.0182621	0.00166485	0.00111977	0.00343067
FCA_GND8103049_CACCTTGAGGACAGAA	0.00761207	0.00520238	0.0117917	0.0076248	0.00464317	0.00975364	0.00385948	0.142916	0.195804	0.332964	0.0227132	0.00285657	0.00738417
FCA_GND8103049_CACCTTGAGTCGAGTG	0.00659548	0.00778226	0.00362087	0.00609112	0.000819091	0.0171421	0.0041072	0.00966943	0.721343	0.0084024	0.00178497	0.00117192	0.00142332
FCA_GND8103049_CACCTTGCACATGTGT	0.0113567	0.0116076	0.00585738	0.0126807	0.00285746	0.0144586	0.00634133	0.0384904	0.38999	0.385998	0.00867231	0.00323133	0.0054659
FCA_GND8103049_CACCTTGCATCCTTGC	0.00309791	0.00129143	0.00215268	0.00267755	0.00144307	0.00266075	0.00214803	0.01571	0.756476	0.0952973	0.00232426	0.00106972	0.00219744
FCA_GND8103049_CACCTTGCATGGTAGG	0.0135093	0.00914828	0.0160384	0.0115615	0.00448655	0.015348	0.00984798	0.0770619	0.505448	0.231618	0.00541589	0.00349641	0.00991977
FCA_GND8103049_CACCTTGGTACACCGC	0.140338	0.0294015	0.0235088	0.08024	0.00695895	0.0380862	0.015029	0.0194042	0.361935	0.0154141	0.0168407	0.00565748	0.112176
FCA_GND8103049_CACCTTGGTCCATGAT	0.0146597	0.00863889	0.0108684	0.0155626	0.0045986	0.0228607	0.0207691	0.124549	0.552298	0.0318921	0.00820198	0.00562528	0.0067453
FCA_GND8103049_CACCTTGTCATAAAGG	0.0143589	0.0118297	0.0167894	0.0184663	0.0063466	0.0142044	0.0105477	0.192472	0.142418	0.507189	0.0131302	0.00498988	0.00745826
FCA_GND8103049_CACCTTGTCCGCGGTA	0.00466514	0.00323938	0.00593423	0.00567412	0.0048931	0.0107604	0.0071791	0.0114486	0.116172	0.0292899	0.00503897	0.00173383	0.00576163
FCA_GND8103049_CACCTTGTCGATCCCT	0.180077	0.056792	0.0166463	0.0484247	0.00772306	0.227664	0.0480218	0.0215515	0.177239	0.0210308	0.00777441	0.00460984	0.0128913
FCA_GND8103049_CACCTTGTCTTACCTA	0.0306387	0.00726799	0.00476081	0.0237849	0.00331338	0.0203383	0.0071848	0.00722054	0.0227558	0.00819626	0.00993273	0.00379768	0.629093
FCA_GND8103049_CACTCCAAGAGCCTAG	0.0663125	0.0171852	0.00561614	0.0622415	0.0115548	0.0579667	0.0363518	0.00914172	0.0345648	0.00803746	0.00596163	0.0098733	0.150693
FCA_GND8103049_CACTCCAAGATTACCC	0.00112128	0.00139299	0.000938112	0.00194767	0.000685096	0.00938467	0.00265393	0.0332632	0.849715	0.0175657	0.0017659	0.00138555	0.000973502
FCA_GND8103049_CACTCCAAGGTAGCCA	0.0135834	0.00887931	0.0044452	0.0132249	0.00245952	0.0115301	0.00489421	0.113935	0.629548	0.0845034	0.0067887	0.0047185	0.00493502
FCA_GND8103049_CACTCCAAGTGAATTG	0.00515969	0.00284968	0.000784175	0.00519849	0.00044102	0.00570958	0.00269748	0.00142784	0.00288503	0.00170978	0.00204091	0.00300033	0.951106
FCA_GND8103049_CACTCCACAAACGTGG	0.00399217	0.00682844	0.00332206	0.00844992	0.000922879	0.00824346	0.00361695	0.0337119	0.627846	0.0354809	0.00206726	0.00182998	0.00176544
FCA_GND8103049_CACTCCACAGACGCAA	0.0176418	0.00515403	0.00340829	0.0135547	0.00431753	0.0132779	0.0176334	0.00544542	0.00610165	0.00549796	0.00389405	0.00377031	0.35069
FCA_GND8103049_CACTCCACATGCAATC	0.230886	0.0666893	0.0142891	0.0451469	0.00330044	0.448788	0.0601883	0.0086212	0.0489554	0.00550979	0.00362112	0.00307195	0.00887639
FCA_GND8103049_CACTCCATCATTATCC	0.00563941	0.00738292	0.00261712	0.0101341	0.00126454	0.0173332	0.003186	0.00895322	0.0383033	0.00616381	0.0051737	0.0023592	0.151155
FCA_GND8103049_CACTCCATCGTCACGG	0.246126	0.0116257	0.00635693	0.0569867	0.00722045	0.0437476	0.458459	0.00887185	0.0130078	0.00396161	0.0076675	0.00460458	0.00611132
FCA_GND8103049_CAGAATCAGACCTAGG	0.00657976	0.00953284	0.00390851	0.0111243	0.00189976	0.805833	0.0443613	0.00224923	0.00778484	0.00160764	0.00254023	0.00344007	0.00638456
FCA_GND8103049_CAGAATCAGTGTGAAT	0.0248413	0.00602901	0.0166669	0.0137712	0.0056434	0.030122	0.00612568	0.0280331	0.578729	0.0113031	0.00336707	0.00201682	0.00526484
FCA_GND8103049_CAGAATCCAACACCCG	0.0141139	0.0105279	0.00708457	0.0151399	0.00323578	0.0240672	0.00906511	0.123487	0.457476	0.0504955	0.0393357	0.00351537	0.00473682
FCA_GND8103049_CAGAATCCAACTGCGC	0.0568468	0.0562519	0.0328578	0.144901	0.291094	0.110831	0.0823019	0.0126964	0.0289028	0.00979927	0.0148094	0.0100175	0.0120778
FCA_GND8103049_CAGAATCCAATACGCT	0.0201614	0.0209654	0.011575	0.0232468	0.0036898	0.052485	0.0232651	0.0322865	0.289066	0.0695473	0.0964734	0.00455634	0.00908605
FCA_GND8103049_CAGAATCCATTTGCCC	0.0804925	0.0572689	0.0355445	0.0373028	0.353008	0.149944	0.113902	0.0138231	0.0672731	0.0129531	0.00715649	0.0103884	0.0160544
FCA_GND8103049_CAGAATCGTAGGCATG	0.0932541	0.0886449	0.0391736	0.037983	0.198933	0.0846368	0.190231	0.0434656	0.0757144	0.0170583	0.0127938	0.00990227	0.0178814
FCA_GND8103049_CAGAATCGTCTGATTG	0.112757	0.0412059	0.0217671	0.0258431	0.0662006	0.211642	0.388415	0.0112943	0.0407177	0.0135066	0.00663299	0.0062728	0.0100575
FCA_GND8103049_CAGAATCGTGAGCGAT	0.0201599	0.00819469	0.00489239	0.0292349	0.00293116	0.0189991	0.00616548	0.00955542	0.0216755	0.00810354	0.00698013	0.00232151	0.662504
FCA_GND8103049_CAGAATCGTTAAGGGC	0.0190413	0.0134708	0.0057026	0.0252487	0.00351822	0.0185038	0.00947165	0.0094424	0.0222752	0.00714682	0.00652788	0.00329341	0.523937
FCA_GND8103049_CAGAATCTCACGACTA	0.047969	0.035387	0.034408	0.0226378	0.292481	0.245224	0.120776	0.0132942	0.0683636	0.0138589	0.00773269	0.00734347	0.0125923
FCA_GND8103049_CAGAATCTCCACGCAG	0.00676015	0.0122913	0.00834719	0.015252	0.713946	0.0419599	0.116458	0.00691899	0.015234	0.00540598	0.00440377	0.00552496	0.0236449
FCA_GND8103049_CAGAGAGAGCCACCTG	0.0158111	0.014121	0.0185623	0.0140466	0.00786817	0.0425079	0.0276929	0.176574	0.191557	0.310157	0.018198	0.00927111	0.0204138
FCA_GND8103049_CAGAGAGCATGGATGG	0.0212011	0.0378568	0.0225759	0.0188537	0.309231	0.21869	0.194398	0.0137682	0.0397782	0.0121909	0.00775604	0.00617604	0.0297106
FCA_GND8103049_CAGATCAAGAGTCGGT	0.0508837	0.0668884	0.0312771	0.0290808	0.318617	0.213719	0.143216	0.0143522	0.0489626	0.00952633	0.00670789	0.00673549	0.0123021
FCA_GND8103049_CAGATCAAGAGTGACC	0.00362612	0.00375826	0.00395178	0.00399038	0.00111123	0.00589562	0.00328718	0.00860304	0.868315	0.02772	0.00133629	0.00160372	0.00136098
FCA_GND8103049_CAGATCAAGATATACG	0.0413537	0.028136	0.0152342	0.0290888	0.00258102	0.206859	0.0110981	0.00663502	0.0581109	0.00683543	0.00464577	0.00412158	0.0222257
FCA_GND8103049_CAGATCAAGCCAACAG	0.0260987	0.016085	0.0120638	0.0186123	0.00248961	0.0901047	0.0254308	0.0539641	0.658188	0.011939	0.00860167	0.0026354	0.00690345
FCA_GND8103049_CAGATCAAGGACCACA	0.0561969	0.0289323	0.00591728	0.0323005	0.00213578	0.0906057	0.733996	0.00336855	0.00915458	0.00187718	0.00209543	0.00281529	0.00290525
FCA_GND8103049_CAGATCAAGGCCATAG	0.0152424	0.0220274	0.00822977	0.0295083	0.00254115	0.0529467	0.00946601	0.0120118	0.305945	0.0334015	0.00714956	0.002213	0.00438864
FCA_GND8103049_CAGATCAAGTAAGTAC	0.0335418	0.0460072	0.0222092	0.0275349	0.528181	0.110858	0.105311	0.0149955	0.0393331	0.00935135	0.00694135	0.00605634	0.0122724
FCA_GND8103049_CAGATCACATCCGCGA	0.0447062	0.0131868	0.00646166	0.0193972	0.00219121	0.0128154	0.00958833	0.00480075	0.0149365	0.0101913	0.00483996	0.0036086	0.817958
FCA_GND8103049_CAGATCATCAACGAAA	0.00277969	0.00831081	0.0018136	0.00717451	0.00100533	0.00565446	0.0026985	0.0362747	0.763704	0.0129171	0.0087054	0.00151979	0.00161213
FCA_GND8103049_CAGATCATCATCTGCC	0.0265549	0.0344583	0.0388094	0.0327874	0.486142	0.102275	0.143381	0.0120291	0.0436136	0.0127347	0.00868074	0.0075287	0.0150635
FCA_GND8103049_CAGATCATCCCTTGCA	0.0119895	0.0123408	0.00508602	0.0342806	0.0031615	0.0641895	0.00592953	0.00738044	0.0359891	0.00717178	0.0048489	0.00397438	0.340682
FCA_GND8103049_CAGATCATCCGCTGTT	0.00341176	0.00379922	0.00239964	0.00456309	0.00101068	0.00927878	0.0029535	0.0274325	0.776513	0.0479592	0.00177061	0.00143378	0.00395734
FCA_GND8103049_CAGATCATCGCGGATC	0.00146196	0.00166183	0.000414414	0.00256008	0.000363322	0.00116164	0.000623565	0.00127745	0.00100447	0.00108299	0.000974583	0.00125037	0.977915
FCA_GND8103049_CAGCAGCAGAATAGGG	0.0335899	0.0292073	0.0240422	0.0270519	0.396086	0.204792	0.131744	0.0105152	0.0390121	0.0106697	0.00613305	0.00659169	0.0330274
FCA_GND8103049_CAGCAGCAGCCTATGT	0.0583598	0.0210967	0.011564	0.0447596	0.00458802	0.0482021	0.0139247	0.0233983	0.265508	0.0273409	0.00621498	0.00444535	0.0167426
FCA_GND8103049_CAGCAGCAGGCTATCT	0.282945	0.0319492	0.016656	0.0921236	0.00388158	0.0737222	0.419775	0.0049058	0.0141309	0.00396613	0.00420145	0.00493696	0.00787575
FCA_GND8103049_CAGCAGCCAAGCCGTC	0.00771168	0.00391906	0.00416195	0.0124447	0.00226455	0.0109256	0.00886355	0.029468	0.425461	0.0219717	0.00749496	0.0015091	0.00279863
FCA_GND8103049_CAGCAGCCATCCGGGT	0.730999	0.0123947	0.00516552	0.0366944	0.00368731	0.0438927	0.0599523	0.00479405	0.0215152	0.00252344	0.0035253	0.00335293	0.00477667
FCA_GND8103049_CAGCAGCGTACAGCAG	0.0246744	0.0133074	0.0055824	0.0216932	0.00276173	0.0150001	0.00871533	0.0109836	0.0252443	0.0230167	0.00633309	0.00420077	0.779387
FCA_GND8103049_CAGCAGCGTGCCTGTG	0.0351811	0.0256611	0.0131218	0.0287291	0.00489141	0.0224252	0.00824669	0.0305112	0.296987	0.0930567	0.0167016	0.00330975	0.00825089
FCA_GND8103049_CAGCAGCGTTGATTGC	0.0416194	0.0768996	0.0176187	0.0196242	0.36878	0.192567	0.161663	0.0115807	0.0355028	0.00668258	0.00505068	0.00826223	0.0214061
FCA_GND8103049_CAGCAGCGTTGGAGGT	0.0356908	0.00646704	0.00498855	0.0301936	0.00225718	0.0499417	0.00674711	0.0100797	0.218243	0.00841456	0.00257785	0.00294236	0.0167394
FCA_GND8103049_CAGCAGCTCAACCATG	0.00780351	0.00748529	0.0175904	0.00701351	0.00436389	0.00914575	0.0069137	0.703231	0.151905	0.0344904	0.00654446	0.006166	0.00776996
FCA_GND8103049_CAGCAGCTCGTTTAGG	0.0106881	0.00344364	0.00494246	0.00976211	0.0010314	0.0158353	0.00461477	0.0096167	0.727989	0.0315996	0.00436924	0.00254526	0.00176841
FCA_GND8103049_CAGCATAAGGTTCCTA	0.000218686	0.000239447	0.991328	0.000784884	0.00119716	0.000252	0.000464499	0.000269478	0.00052657	0.000385578	0.00134171	0.00112986	0.000777512
FCA_GND8103049_CAGCATAAGTACTTGC	0.0202891	0.0186573	0.00941679	0.0332192	0.00997714	0.0594974	0.0239145	0.0841158	0.199613	0.048476	0.136107	0.00594236	0.0181413
FCA_GND8103049_CAGCATACACGGCTAC	0.0129061	0.00927948	0.0029577	0.0169059	0.00227521	0.0303618	0.00907859	0.00650095	0.0280503	0.00652952	0.00417694	0.00320425	0.320242
FCA_GND8103049_CAGCATAGTGTCGCTG	0.00986802	0.00902187	0.0142326	0.00517764	0.000782762	0.00968022	0.0048825	0.00154276	0.00500752	0.00239465	0.001356	0.00128931	0.907317
FCA_GND8103049_CAGCATATCCGCTGTT	0.00831296	0.00502608	0.00135445	0.00772272	0.0017097	0.00960554	0.00305657	0.00581208	0.0100362	0.00347106	0.00294674	0.0025467	0.198234
FCA_GND8103049_CAGCCGAAGTGGGCTA	0.0128361	0.0126358	0.00948377	0.0164381	0.00277695	0.0178874	0.0111563	0.0881887	0.335468	0.173525	0.270463	0.00469038	0.00346823
FCA_GND8103049_CAGCCGACAAGGTTCT	0.00458953	0.00279792	0.00213256	0.00185711	0.00142881	0.00224498	0.00123364	0.0514521	0.868815	0.0263276	0.00164133	0.00156535	0.0011941
FCA_GND8103049_CAGCCGACACCGAATT	0.0717356	0.0139682	0.0241	0.0338596	0.00733313	0.130139	0.0787023	0.041671	0.324749	0.0394456	0.0141128	0.00719677	0.0216501
FCA_GND8103049_CAGCCGACATTTGCCC	0.0537896	0.0193918	0.0121237	0.0345075	0.0046008	0.118869	0.0160517	0.0156699	0.29347	0.0200332	0.00706464	0.00264924	0.00728091
FCA_GND8103049_CAGCCGAGTCTCTCGT	0.0777989	0.0334668	0.0164754	0.0401863	0.16545	0.261612	0.069472	0.0315346	0.0824317	0.0190756	0.00756246	0.00706725	0.0375671
FCA_GND8103049_CAGCCGAGTCTTCGTC	0.00631743	0.00454909	0.0031191	0.00766663	0.00169991	0.0156402	0.00677091	0.00766238	0.0123496	0.00736693	0.00598656	0.00224572	0.504094
FCA_GND8103049_CAGCCGATCACGACTA	0.0216441	0.0152766	0.00969293	0.0137877	0.0032894	0.0695983	0.00625787	0.0174098	0.288685	0.0272499	0.0218569	0.00341081	0.0268819
FCA_GND8103049_CAGCGACAGCAAATCA	0.017769	0.0324769	0.0121545	0.0168589	0.0030801	0.0443637	0.0124893	0.0265638	0.35952	0.303226	0.0304275	0.00490933	0.00508255
FCA_GND8103049_CAGCGACAGCCACGTC	0.00360942	0.0062983	0.00169769	0.012236	0.00135926	0.00527526	0.00630564	0.0418668	0.792334	0.0294788	0.00258858	0.00125089	0.00175942
FCA_GND8103049_CAGCGACAGGTTACCT	0.0100418	0.00568976	0.00346981	0.0113787	0.00125358	0.0492126	0.0374733	0.0095986	0.513331	0.00944383	0.0116407	0.00230659	0.0034404
FCA_GND8103049_CAGCGACCAATGTAAG	0.0252682	0.00785594	0.00635062	0.0113312	0.00244074	0.0365168	0.0051196	0.00567926	0.0258121	0.00817038	0.00383101	0.00270941	0.797995
FCA_GND8103049_CAGCGACGTGCACGAA	0.0206995	0.012171	0.0135852	0.013329	0.00262973	0.0338394	0.007825	0.0466323	0.306905	0.0481247	0.0144051	0.00252367	0.0666432
FCA_GND8103049_CAGCGACGTTACGTCA	0.0573109	0.0593555	0.0388973	0.0236374	0.199346	0.365647	0.0610634	0.0131067	0.0610228	0.0178348	0.00934382	0.00664658	0.0114772
FCA_GND8103049_CAGCGACTCGGCGGTT	0.00720418	0.0113431	0.00652369	0.00897215	0.00203683	0.00886758	0.00522322	0.0489485	0.775888	0.0407563	0.00330339	0.00195313	0.00393765
FCA_GND8103049_CAGCTAAGTGACTCAT	0.00730308	0.00530274	0.00250987	0.00729381	0.00131394	0.00866368	0.0040434	0.0114629	0.517774	0.00982983	0.0035102	0.00199333	0.00290994
FCA_GND8103049_CAGCTAATCACTTATC	0.0193251	0.00938941	0.0114201	0.00828807	0.00313443	0.0103074	0.01025	0.246862	0.451901	0.188952	0.00344974	0.00335162	0.0062241
FCA_GND8103049_CAGCTAATCCGAGCCA	0.0524232	0.0234633	0.0125513	0.025054	0.00549045	0.160398	0.0397204	0.0154026	0.12457	0.0162494	0.0144381	0.00786585	0.218115
FCA_GND8103049_CAGCTAATCCTTGGTC	0.175266	0.144684	0.0318937	0.125058	0.0708489	0.0810831	0.192674	0.0217615	0.0328141	0.0179861	0.0127237	0.00852447	0.0215826
FCA_GND8103049_CAGCTAATCGGGAGTA	0.0180662	0.0150264	0.0237022	0.0169136	0.0115249	0.0337385	0.0132854	0.0856853	0.223936	0.333627	0.0347716	0.00760332	0.0229299
FCA_GND8103049_CAGCTGGCAAGGGTCA	0.0162968	0.00673292	0.0041989	0.00834239	0.00278885	0.737421	0.0296473	0.00256379	0.0166575	0.00226612	0.00322866	0.00308483	0.00963092
FCA_GND8103049_CAGCTGGCACAGGTTT	0.0360606	0.0103143	0.0067681	0.0101998	0.00207023	0.00732734	0.00419822	0.0399723	0.824606	0.0186206	0.0020964	0.00225069	0.00361599
FCA_GND8103049_CAGCTGGCATATACGC	0.00978299	0.0174742	0.00466975	0.0188909	0.0026647	0.0116559	0.00972878	0.0827777	0.55732	0.00710645	0.00434426	0.00356879	0.00516034
FCA_GND8103049_CAGCTGGTCGTAGATC	0.120509	0.0701247	0.0200317	0.0143359	0.00325033	0.0614388	0.018964	0.0849653	0.476943	0.0721091	0.00836386	0.00391115	0.0072264
FCA_GND8103049_CAGCTGGTCGTCACGG	0.011937	0.014193	0.00381557	0.0481449	0.00401864	0.048842	0.0115332	0.00576888	0.0822017	0.00492853	0.00372035	0.00309045	0.00436663
FCA_GND8103049_CAGGTGCAGCCTTGAT	0.00236216	0.0018097	0.00117409	0.00217361	0.000438191	0.00174214	0.00102706	0.000892557	0.00194522	0.00145923	0.00112172	0.00118473	0.978655
FCA_GND8103049_CAGGTGCCAAGCCGTC	0.0185455	0.0192332	0.0176059	0.0142193	0.00416685	0.0199294	0.00893817	0.056796	0.0818398	0.231844	0.409572	0.00545285	0.00789362
FCA_GND8103049_CAGGTGCCAAGCTGGA	0.0776595	0.0200021	0.0081896	0.0171362	0.00276817	0.0257773	0.0174296	0.0184058	0.720339	0.0115982	0.00231099	0.00381415	0.00638971
FCA_GND8103049_CAGGTGCCAATAACGA	0.0187322	0.00460832	0.00214987	0.0113558	0.00254483	0.00301608	0.930206	0.00324757	0.00574191	0.000764577	0.00151058	0.00271876	0.00172682
FCA_GND8103049_CAGGTGCGTCCTGCTT	0.0419496	0.0093216	0.00576197	0.140842	0.00178248	0.0210964	0.728596	0.00251218	0.00454354	0.00249546	0.00195175	0.00250634	0.00219241
FCA_GND8103049_CAGGTGCGTTCAGGCC	0.00344146	0.00465874	0.00290037	0.00503824	0.00133008	0.139068	0.00306827	0.00502381	0.0190393	0.00186425	0.00202034	0.0012005	0.0140724
FCA_GND8103049_CAGGTGCTCCAGTAGT	0.00818856	0.00357492	0.00463174	0.00632183	0.00271904	0.0120977	0.00617951	0.0346817	0.643771	0.119363	0.00257666	0.00263408	0.00406249
FCA_GND8103049_CAGTAACAGAATCTCC	0.0109845	0.00358741	0.00150212	0.00888474	0.000482003	0.00262472	0.00243947	0.00147805	0.00249895	0.0018881	0.00113981	0.00156637	0.950857
FCA_GND8103049_CAGTAACAGAATGTTG	0.0447004	0.0171533	0.00831331	0.0333714	0.00302213	0.0186419	0.021457	0.0404599	0.685574	0.0294545	0.00412621	0.00340327	0.00769629
FCA_GND8103049_CAGTAACAGATCCGAG	0.0324335	0.0134526	0.00437208	0.0119119	0.00170585	0.0969319	0.00990489	0.00787214	0.0301138	0.00692051	0.00502083	0.00281234	0.0572937
FCA_GND8103049_CAGTAACAGCAATATG	0.582471	0.0195263	0.0089375	0.131005	0.003261	0.0759015	0.0927472	0.0046862	0.0121289	0.00375853	0.00307486	0.00347364	0.00906311
FCA_GND8103049_CAGTAACCACCACGTG	0.016111	0.00734373	0.00290127	0.0123287	0.00166801	0.0402667	0.00578785	0.00617669	0.0614199	0.00482404	0.00392029	0.00319814	0.107266
FCA_GND8103049_CAGTAACCATGCGCAC	0.00471284	0.00120563	0.00231577	0.00283294	0.000706045	0.00434431	0.00204926	0.00921876	0.886924	0.00353783	0.00218432	0.00182622	0.000946262
FCA_GND8103049_CAGTCCTAGTCAAGGC	0.00493867	0.00334652	0.00612181	0.00792056	0.00113478	0.0288027	0.00352166	0.0100897	0.776208	0.019158	0.00386458	0.00126889	0.00310989
FCA_GND8103049_CAGTCCTCACAAGACG	0.0432273	0.0585647	0.0194644	0.0258901	0.155042	0.342483	0.118476	0.0348214	0.0665443	0.0215808	0.0111506	0.00602995	0.0129249
FCA_GND8103049_CAGTCCTCACTGTGTA	0.0267878	0.0188993	0.0344138	0.0463437	0.66919	0.0976572	0.0450054	0.00364566	0.00888426	0.00367649	0.003828	0.00711767	0.00682967
FCA_GND8103049_CAGTCCTCATGACGGA	0.0180057	0.020251	0.0146492	0.0417277	0.717394	0.0581003	0.0727814	0.00419164	0.00773339	0.00299791	0.00375854	0.00627233	0.00563978
FCA_GND8103049_CAGTCCTGTAAATACG	0.00890346	0.00266676	0.0185473	0.0201366	0.000551629	0.00965532	0.00828717	0.000923726	0.00292496	0.00163754	0.00132179	0.00106665	0.908239
FCA_GND8103049_CAGTCCTTCTCCAGGG	0.039252	0.0211637	0.0234436	0.0185895	0.577598	0.0907302	0.0848215	0.0163608	0.0522037	0.0139015	0.00856056	0.00937585	0.0149598
FCA_GND8103049_CAGTCCTTCTTGTTTG	0.0256358	0.0208506	0.00540843	0.0133814	0.00140274	0.0300465	0.00947557	0.0194329	0.737178	0.0197651	0.00533726	0.00239841	0.00378859
FCA_GND8103049_CATATGGAGGCTAGAC	0.063351	0.0176017	0.0149106	0.0213586	0.00609996	0.0397767	0.01798	0.0731115	0.418648	0.124403	0.00887893	0.0044227	0.00962494
FCA_GND8103049_CATATGGAGTACGCGA	0.00480567	0.00645489	0.00434065	0.00788275	0.00163416	0.0276291	0.00756548	0.0148484	0.480416	0.038955	0.00417796	0.00176383	0.00308748
FCA_GND8103049_CATATGGCACCTCGTT	0.0220037	0.0230515	0.00834774	0.0220234	0.00401783	0.0265375	0.0152062	0.0170808	0.371649	0.0627499	0.0107891	0.00358576	0.00560915
FCA_GND8103049_CATATGGCAGCATACT	0.00422989	0.00573973	0.00250207	0.004703	0.000914802	0.0138339	0.00311756	0.0332323	0.214255	0.0345554	0.00467753	0.00185673	0.0133354
FCA_GND8103049_CATATGGTCTTCCTTC	0.30989	0.0570636	0.0120642	0.105378	0.00485845	0.0880561	0.258044	0.00764873	0.0228178	0.00465511	0.00434493	0.00486366	0.00696146
FCA_GND8103049_CATATTCAGACTACAA	0.000589491	0.00060513	0.984209	0.00170572	0.00159938	0.000403842	0.00112748	0.000403162	0.000853584	0.000554388	0.00213365	0.00152528	0.00139985
FCA_GND8103049_CATATTCAGTAATCCC	0.019469	0.0319729	0.0089717	0.030005	0.00292026	0.288838	0.0105441	0.0068114	0.107707	0.0131236	0.0053051	0.00245093	0.0062642
FCA_GND8103049_CATATTCCACGTGAGA	0.00497894	0.00283881	0.000681547	0.00800759	0.000442565	0.00251038	0.00220584	0.00116407	0.00230162	0.0006899	0.00118697	0.00117001	0.964003
FCA_GND8103049_CATATTCTCACCGTAA	0.0128469	0.022713	0.00614395	0.0108324	0.00234506	0.0139044	0.00684852	0.0187558	0.804955	0.0217431	0.00362535	0.00349173	0.00448115
FCA_GND8103049_CATATTCTCGGTTCGG	0.0127705	0.0125525	0.00448368	0.0213082	0.00333395	0.0162271	0.0099958	0.0195236	0.502615	0.0131223	0.00343244	0.0025675	0.00307043
FCA_GND8103049_CATCAAGAGACCACGA	0.0870133	0.0413528	0.0229067	0.026379	0.379691	0.125979	0.151495	0.0177307	0.0442023	0.0147397	0.00673069	0.00802722	0.0186772
FCA_GND8103049_CATCAAGAGTTCGCAT	0.0162686	0.00842711	0.00735187	0.00818751	0.00156887	0.0263819	0.00640184	0.0276682	0.765891	0.00912954	0.00153277	0.00196127	0.00586341
FCA_GND8103049_CATCAAGCACCCATTC	0.00257614	0.00350443	0.00319681	0.0046721	0.00112602	0.0555213	0.00657409	0.0254489	0.195896	0.0114258	0.0156297	0.00169895	0.0865468
FCA_GND8103049_CATCAAGCAGTCAGAG	0.000197514	0.000305794	0.000623501	0.000554782	0.00124071	0.000131097	0.000205306	0.000190256	0.000140981	0.000174248	0.00037948	0.000351805	0.000562765
FCA_GND8103049_CATCAAGGTCGCATAT	0.0155099	0.0072659	0.00602138	0.0145292	0.00177302	0.0314868	0.0189791	0.0117559	0.552507	0.0467648	0.00938657	0.00242385	0.00310601
FCA_GND8103049_CATCAAGGTCTACCTC	0.00736089	0.00726375	0.00704672	0.0264344	0.00440665	0.361439	0.0130883	0.0509611	0.349461	0.0183408	0.00744416	0.00381545	0.0697346
FCA_GND8103049_CATCAAGGTGACGCCT	0.0105435	0.00954569	0.0136534	0.0110738	0.00286808	0.0149554	0.00471047	0.0492984	0.675245	0.0215784	0.00579652	0.00176088	0.00486152
FCA_GND8103049_CATCAAGTCAGGTTCA	0.000613664	0.000334384	0.969414	0.00364998	0.000407139	0.000555115	0.00229264	0.000214358	0.000366454	0.000290144	0.000442535	0.000751157	0.0191465
FCA_GND8103049_CATCAAGTCCTAGTGA	0.073934	0.0180786	0.022045	0.0198935	0.00436437	0.0213961	0.0133784	0.215265	0.499176	0.0321527	0.00495925	0.00398494	0.0169067
FCA_GND8103049_CATCAAGTCCTTTCTC	0.0704525	0.0626213	0.020512	0.0274382	0.29254	0.169449	0.134328	0.026426	0.071963	0.0148225	0.00785337	0.00895265	0.0264547
FCA_GND8103049_CATCAGAAGACGCACA	0.0107069	0.013694	0.00352683	0.0150245	0.00154781	0.0225059	0.00894755	0.0662546	0.616229	0.0184328	0.00483055	0.00141618	0.00403358
FCA_GND8103049_CATCAGAAGCAGCCTC	0.03283	0.0197997	0.00691302	0.0112131	0.00118239	0.0503453	0.0235175	0.0120143	0.752526	0.0105951	0.00423918	0.00356205	0.00274544
FCA_GND8103049_CATCAGAAGGGAGTAA	0.054152	0.049813	0.0309538	0.0332182	0.390023	0.167134	0.14364	0.0118357	0.03972	0.0115431	0.00577891	0.00727227	0.016259
FCA_GND8103049_CATCAGAAGTGAACGC	0.0103536	0.00198445	0.00461974	0.006704	0.0015219	0.0133518	0.00474397	0.0392619	0.868053	0.0131723	0.00274727	0.00180159	0.00327
FCA_GND8103049_CATCAGACAACACGCC	0.0389049	0.0234927	0.0258297	0.0211484	0.343724	0.0539943	0.356175	0.0233526	0.0269173	0.0139896	0.00793088	0.00693124	0.0183248
FCA_GND8103049_CATCAGACACGGCTAC	0.0680412	0.0911779	0.0530557	0.0240802	0.252609	0.130963	0.194838	0.0214014	0.0570087	0.0230319	0.00972454	0.008476	0.0127566
FCA_GND8103049_CATCAGACAGTGAGTG	0.0826026	0.0431544	0.0298312	0.0939267	0.136806	0.244788	0.198657	0.0110596	0.037908	0.0155597	0.00734778	0.00657102	0.0541776
FCA_GND8103049_CATCAGACATTGTGCA	0.0458358	0.0208165	0.00851974	0.0403408	0.00614105	0.145786	0.047968	0.00852416	0.028586	0.00689751	0.00628488	0.00633086	0.365906
FCA_GND8103049_CATCAGACATTTCAGG	0.0773645	0.0445421	0.0456454	0.0250089	0.36774	0.163587	0.10164	0.0166178	0.0463367	0.0140136	0.00776171	0.00785567	0.0230968
FCA_GND8103049_CATCAGAGTAGAGTGC	0.0253734	0.0436908	0.0136906	0.0151943	0.486107	0.158577	0.136964	0.0121864	0.0343493	0.00801902	0.00597924	0.00595318	0.0134314
FCA_GND8103049_CATCAGATCATCGGAT	0.00589909	0.00475076	0.00254582	0.0105387	0.00870731	0.00821417	0.0129182	0.008485	0.00756927	0.00795564	0.00327576	0.00230037	0.862758
FCA_GND8103049_CATCAGATCCATGAAC	0.0301893	0.0154173	0.0109487	0.0177768	0.00246765	0.0118777	0.00720566	0.14296	0.637644	0.0521238	0.00512962	0.00472703	0.0077472
FCA_GND8103049_CATCAGATCGTCCAGG	0.215392	0.0185777	0.0139862	0.0167514	0.0065691	0.166361	0.0266235	0.0406884	0.374732	0.0232585	0.00795623	0.00388017	0.00711885
FCA_GND8103049_CATCAGATCTATCGCC	0.00750587	0.00595517	0.00961083	0.00646309	0.00444114	0.0407085	0.015556	0.0963615	0.626744	0.102172	0.00624086	0.00356619	0.00727404
FCA_GND8103049_CATCCACAGAAGGTGA	0.00218747	0.00175183	0.00310775	0.00340085	0.00283697	0.056397	0.00151386	0.000890706	0.00171839	0.000483448	0.00117673	0.000850116	0.0147036
FCA_GND8103049_CATCCACAGTCCATAC	0.00713436	0.00450711	0.00579287	0.00325213	0.00366463	0.00224911	0.0021516	0.403316	0.437411	0.0979233	0.00283818	0.00231483	0.00118179
FCA_GND8103049_CATCCACCAGCCAGAA	0.0474037	0.02996	0.0201985	0.0255664	0.453093	0.157743	0.117617	0.00881965	0.0224968	0.00741567	0.00633255	0.00648686	0.0259139
FCA_GND8103049_CATCCACGTCAGAGGT	0.0792265	0.08092	0.0180093	0.0346633	0.267912	0.134087	0.110848	0.0399108	0.053207	0.015109	0.0112921	0.00758828	0.019576
FCA_GND8103049_CATCCACTCGTAGATC	0.0118394	0.00524372	0.00378048	0.00749512	0.0027682	0.0139806	0.00872309	0.0557993	0.634796	0.0937645	0.00675838	0.00282548	0.00427751
FCA_GND8103049_CATCCACTCGTGTAGT	0.0517832	0.0606788	0.0269384	0.0156327	0.134608	0.402589	0.148922	0.0170802	0.0599488	0.0106614	0.00745364	0.00638632	0.01788
FCA_GND8103049_CATCCACTCTTCGGTC	0.0129627	0.0109048	0.0106128	0.0193561	0.00621954	0.0167343	0.00919868	0.0671695	0.277501	0.344152	0.0124485	0.00670664	0.00959559
FCA_GND8103049_CATCGAAAGGCCCGTT	0.013337	0.0153937	0.0129242	0.0184139	0.00679504	0.024765	0.0112732	0.12599	0.355984	0.27051	0.0190947	0.00484538	0.0148504
FCA_GND8103049_CATCGAACACCGAATT	0.0286835	0.0199548	0.0255179	0.0103381	0.342474	0.223605	0.198278	0.0105034	0.0506864	0.00749242	0.00674993	0.00741487	0.0286141
FCA_GND8103049_CATCGAACAGATGGGT	0.00227765	0.00118608	0.00333454	0.00181284	0.000855445	0.008958	0.00336983	0.0191356	0.908991	0.00955638	0.00724141	0.00151917	0.00138018
FCA_GND8103049_CATCGAAGTACAGTTC	0.0163049	0.0130125	0.0155496	0.0156872	0.00602959	0.0315414	0.0160743	0.0137602	0.0454516	0.639439	0.015715	0.00500602	0.0108503
FCA_GND8103049_CATCGAAGTACCGAGA	0.789225	0.00920265	0.00554456	0.0451481	0.00233807	0.0180768	0.0710496	0.00418648	0.00585634	0.00229348	0.00520861	0.00223464	0.00222917
FCA_GND8103049_CATCGAATCATAACCG	0.0241022	0.0102671	0.00999237	0.0151667	0.00316006	0.0154954	0.0105582	0.0566259	0.244642	0.32133	0.00916049	0.0047661	0.0248756
FCA_GND8103049_CATCGAATCCCACTTG	0.0655685	0.0587388	0.021722	0.0225636	0.425234	0.178958	0.0912206	0.0129501	0.0344639	0.0108126	0.00541962	0.00942808	0.0187583
FCA_GND8103049_CATCGAATCTTCGGTC	0.00993163	0.0108448	0.0114177	0.013644	0.00333939	0.0138292	0.00884157	0.0272171	0.470462	0.273146	0.00425134	0.0023787	0.00355008
FCA_GND8103049_CATCGGGCAACACCCG	0.00128046	0.00168808	0.00117354	0.00335229	0.000814023	0.00569019	0.00175817	0.00316473	0.00138292	0.00275266	0.00264158	0.00122599	0.718336
FCA_GND8103049_CATCGGGCAGTTCATG	0.00213311	0.0018321	0.000788396	0.00600217	0.000849241	0.00363098	0.00243031	0.00144214	0.0028779	0.00146145	0.00154056	0.00222197	0.893902
FCA_GND8103049_CATCGGGGTAGAGGAA	0.0591683	0.0137656	0.0100554	0.0556022	0.0102778	0.06424	0.0178845	0.00540142	0.0104565	0.00340742	0.006251	0.00379306	0.0129
FCA_GND8103049_CATCGGGTCCGCATCT	0.00044109	0.00112594	0.00396769	0.00106347	0.00248816	0.000299804	0.000557798	0.000350174	0.000463147	0.00034851	0.000816378	0.00110258	0.00171891
FCA_GND8103049_CATCGGGTCGAACGGA	0.0122165	0.0323022	0.0149209	0.00720629	0.715777	0.08701	0.0652599	0.00715847	0.0169261	0.00444249	0.00438162	0.00689863	0.0104138
FCA_GND8103049_CATGACAAGAAACCGC	0.137481	0.0415893	0.0781718	0.0363313	0.00943014	0.0505096	0.0266888	0.0102396	0.0295303	0.0115693	0.00534978	0.00744518	0.388405
FCA_GND8103049_CATGACACAAGAAGAG	0.0679487	0.0478632	0.021422	0.0272982	0.336119	0.217557	0.136843	0.0168791	0.0546757	0.0107396	0.00660152	0.0075015	0.0123833
FCA_GND8103049_CATGACACACTCAGGC	0.0529502	0.0533381	0.0223147	0.0181683	0.291718	0.293223	0.104009	0.0112173	0.0643881	0.00826193	0.00461386	0.006751	0.0192745
FCA_GND8103049_CATGACAGTCACTTCC	0.120924	0.0298606	0.0188441	0.065484	0.0212712	0.0831505	0.0341474	0.0316396	0.213636	0.0165746	0.0109488	0.00808192	0.103611
FCA_GND8103049_CATGACAGTTCCAACA	0.0509461	0.034381	0.00727373	0.0273192	0.00319017	0.0708227	0.0157677	0.0222348	0.597097	0.0175482	0.0107149	0.00385543	0.00500538
FCA_GND8103049_CATGACATCCGTCAAA	0.008195	0.00380883	0.00238917	0.00797614	0.000987715	0.0366885	0.0111882	0.0264247	0.677858	0.00491547	0.00289225	0.00249062	0.00821636
FCA_GND8103049_CATGACATCTACGAGT	0.00586289	0.00237607	0.00783892	0.00612357	0.00194505	0.0247862	0.0112328	0.0775441	0.642326	0.0425758	0.00460727	0.00171898	0.0033887
FCA_GND8103049_CATGCCTAGACAAAGG	0.0740285	0.0244127	0.00451853	0.128791	0.0184806	0.0238364	0.622543	0.00797063	0.0173952	0.00380704	0.00354899	0.00446348	0.00364615
FCA_GND8103049_CATGCCTAGTACTTGC	0.189519	0.0804742	0.0225732	0.0300678	0.04345	0.374953	0.0771662	0.0121653	0.083045	0.0107897	0.00615747	0.00592951	0.00799825
FCA_GND8103049_CATGCCTAGTTACGGG	0.0304597	0.0141012	0.00631537	0.0206676	0.00280595	0.412236	0.026987	0.00211913	0.0130053	0.00164906	0.00279856	0.00218417	0.0153554
FCA_GND8103049_CATGCCTCAAGAGGCT	0.0552996	0.0734151	0.0185398	0.0263837	0.224902	0.292127	0.155753	0.0150052	0.0601604	0.00923548	0.00550904	0.0066248	0.0141671
FCA_GND8103049_CATGCCTCAATGCCAT	0.00934604	0.00753386	0.00671833	0.0103207	0.00327392	0.0185161	0.0105851	0.0548521	0.670905	0.108142	0.0106795	0.00336767	0.00378096
FCA_GND8103049_CATGCCTCAGCTGCAC	0.00343907	0.00457986	0.00607149	0.00932546	0.0028076	0.00859676	0.00515906	0.101127	0.663525	0.119232	0.00518278	0.00236701	0.00556497
FCA_GND8103049_CATGCCTCATACGCCG	0.0274608	0.0105222	0.0195196	0.0250767	0.00748004	0.0323486	0.0183959	0.0790203	0.356786	0.301045	0.0286271	0.00492669	0.00712762
FCA_GND8103049_CATGCCTCATTGTGCA	0.0696276	0.0338239	0.0204541	0.0281812	0.406344	0.142525	0.111193	0.0229408	0.0473281	0.00837735	0.00597766	0.00746706	0.0371433
FCA_GND8103049_CATGCCTGTTGCCTCT	0.00377638	0.00397139	0.00321967	0.00214707	0.0016552	0.00792643	0.00345751	0.034331	0.84477	0.0681225	0.00123509	0.00225338	0.00267154
FCA_GND8103049_CATGCCTTCAACACGT	0.00309772	0.00258368	0.00135201	0.0020431	0.000735919	0.00213507	0.00308289	0.035682	0.926951	0.0121075	0.000578719	0.00197074	0.000749879
FCA_GND8103049_CATGGCGAGGCTAGCA	0.00839059	0.0102741	0.0094855	0.00760349	0.00443209	0.019601	0.00852196	0.00381732	0.0202367	0.00853307	0.00821292	0.00365263	0.856437
FCA_GND8103049_CATGGCGCAAAGGAAG	0.0118296	0.012963	0.00941405	0.00635824	0.826102	0.0275376	0.0638983	0.00465132	0.00840188	0.00281351	0.00346423	0.0037715	0.00424793
FCA_GND8103049_CATGGCGCAATCCAAC	0.293299	0.255458	0.0207989	0.0709527	0.00727367	0.0148845	0.0116988	0.00941483	0.0249233	0.0131876	0.00453692	0.0118002	0.00646345
FCA_GND8103049_CATGGCGCATGCAACT	0.0255862	0.0189484	0.0105985	0.0179752	0.00441134	0.0113346	0.00661778	0.0684956	0.368514	0.15696	0.0155216	0.00562915	0.00621284
FCA_GND8103049_CATGGCGGTCCGAACC	0.0401886	0.0258163	0.00846249	0.029449	0.00711857	0.0323403	0.0196987	0.0359105	0.0503979	0.0347832	0.0103987	0.00461088	0.540232
FCA_GND8103049_CATGGCGGTCGCGAAA	0.0109604	0.00706527	0.0037922	0.00860198	0.00139118	0.0942506	0.0208234	0.0190096	0.640495	0.0302041	0.00331015	0.00511169	0.00582615
FCA_GND8103049_CATGGCGGTGCGAAAC	0.426138	0.0596761	0.0196473	0.143395	0.00246936	0.0794752	0.194629	0.00581613	0.0190473	0.00391054	0.00350864	0.00322957	0.00461559
FCA_GND8103049_CATGGCGGTGCGGTAA	0.000750878	0.000478151	0.00053872	0.00140396	0.000373837	0.000493429	0.000456869	0.000838331	0.000978291	0.00138551	0.000884027	0.00117576	0.988682
FCA_GND8103049_CATGGCGGTTCATGGT	0.00337477	0.00204607	0.00403934	0.00296256	0.00249044	0.00931566	0.00530784	0.0616273	0.760459	0.0956882	0.00960891	0.00278402	0.0058295
FCA_GND8103049_CATGGCGTCAGATAAG	0.00420686	0.00366161	0.00498301	0.0038695	0.00191458	0.0310512	0.00607517	0.0284955	0.103346	0.0049447	0.00560289	0.00147218	0.0247334
FCA_GND8103049_CATGGCGTCCAATGGT	0.0239365	0.0134818	0.0164402	0.0117405	0.00713681	0.0188212	0.0143243	0.0618255	0.322187	0.427228	0.00731345	0.00506298	0.00946928
FCA_GND8103049_CATGGCGTCCATGCTC	0.0248912	0.00673795	0.0104165	0.0152168	0.00244968	0.0372064	0.017573	0.0239462	0.75077	0.0080968	0.00853914	0.00274538	0.00391467
FCA_GND8103049_CATTATCAGAGCTGCA	0.0120669	0.00932496	0.0052932	0.0163995	0.00507476	0.0141545	0.0114318	0.0102055	0.150249	0.0182287	0.0142642	0.00281727	0.00687241
FCA_GND8103049_CATTATCCAGCTGCAC	0.299785	0.0186255	0.0102508	0.0414709	0.00648853	0.132808	0.413442	0.00509116	0.0173066	0.00370748	0.00323412	0.00351071	0.00698581
FCA_GND8103049_CATTATCGTAGCCTAT	0.397552	0.0240648	0.0125994	0.0855531	0.00804506	0.130745	0.145385	0.00692896	0.0302104	0.00524715	0.00517224	0.00577415	0.0134455
FCA_GND8103049_CATTATCGTGTCTGAT	0.0309441	0.0203699	0.0135852	0.0197896	0.00443173	0.0291014	0.0121449	0.0943846	0.415278	0.210729	0.00628531	0.00406776	0.00699574
FCA_GND8103049_CATTATCTCGCAAGCC	0.0918437	0.054687	0.0190055	0.0636884	0.0552466	0.193389	0.393659	0.00865047	0.0263436	0.00891162	0.00503955	0.00535601	0.0207814
FCA_GND8103049_CATTATCTCGCAGGCT	0.042242	0.0350561	0.0235254	0.0180391	0.0907033	0.471987	0.0299907	0.0266689	0.117003	0.0153613	0.00696112	0.00460623	0.01066
FCA_GND8103049_CATTATCTCGTAGGAG	0.00989993	0.0163974	0.018958	0.012996	0.011318	0.0277028	0.0200189	0.0116244	0.0466821	0.0192966	0.0209889	0.00690542	0.693987
FCA_GND8103049_CATTCGCGTAAACCTC	0.0207475	0.0122188	0.0168275	0.0237811	0.00787427	0.0241841	0.0165312	0.0497815	0.393227	0.212541	0.0107498	0.00596006	0.0102092
FCA_GND8103049_CATTCGCGTCTCCATC	0.128045	0.0127647	0.0108504	0.0449578	0.0126765	0.429506	0.266872	0.00557852	0.0168109	0.0034183	0.00416653	0.00604712	0.0143284
FCA_GND8103049_CATTCGCGTCTCTCTG	0.00785952	0.00316914	0.00121958	0.00353768	0.000590826	0.00441363	0.0015929	0.00332012	0.00587422	0.00303683	0.0017376	0.00170539	0.952304
FCA_GND8103049_CATTCGCGTGCCTTGG	0.0411278	0.0457623	0.018946	0.0177451	0.192844	0.357576	0.144378	0.0198698	0.072161	0.0105725	0.00664165	0.00671181	0.018062
FCA_GND8103049_CATTCGCGTGCTTCTC	0.00395528	0.00749273	0.00438704	0.0102701	0.00228093	0.0327648	0.00461722	0.0117182	0.514915	0.0788875	0.00665943	0.00228994	0.0116744
FCA_GND8103049_CATTCGCGTGTTCGAT	0.00443394	0.00370408	0.00259402	0.00546393	0.00169495	0.059045	0.00514172	0.00298068	0.0471441	0.00159564	0.00184068	0.00140833	0.00687729
FCA_GND8103049_CATTCGCGTTAAGACA	0.0253053	0.0125626	0.0160305	0.0241367	0.00323091	0.132603	0.0273714	0.0136336	0.297824	0.0177954	0.0128846	0.00236992	0.00566127
FCA_GND8103049_CATTCGCGTTAGTGGG	0.0239201	0.00733896	0.0140491	0.0117805	0.00427278	0.0915595	0.0229696	0.0276443	0.315679	0.0184993	0.0115479	0.00485926	0.0282979
FCA_GND8103049_CATTCGCTCACGGTTA	0.00990593	0.00720191	0.00592152	0.00915678	0.00281163	0.00967738	0.00423715	0.0207967	0.743099	0.00539393	0.00306677	0.00160049	0.00332055
FCA_GND8103049_CATTCGCTCCAAATGC	0.1415	0.0186622	0.0112099	0.0846443	0.0117768	0.267129	0.194601	0.0058313	0.0190915	0.00507459	0.00386841	0.00386461	0.00977411
FCA_GND8103049_CCAATCCAGCCAGAAC	0.0134902	0.0200938	0.00756039	0.0140537	0.00438231	0.0483868	0.0295815	0.0263132	0.370388	0.00923446	0.0106268	0.00254071	0.00971174
FCA_GND8103049_CCAATCCAGCGATTCT	0.0911299	0.0582464	0.0093854	0.0234381	0.00945983	0.0492516	0.665715	0.00530249	0.0131887	0.00268808	0.00350588	0.00555	0.0100825
FCA_GND8103049_CCAATCCGTCCCGACA	0.00508603	0.00240653	0.00150454	0.00481706	0.000644346	0.00209317	0.00117652	0.0029655	0.00624726	0.00549371	0.00161321	0.00188338	0.939856
FCA_GND8103049_CCAATCCGTCGGATCC	0.00504538	0.00352994	0.00183484	0.0043756	0.00153476	0.0105948	0.00405605	0.0106887	0.0066729	0.00563482	0.00176017	0.00169254	0.11031
FCA_GND8103049_CCAATCCTCGTTGACA	0.0274872	0.0394364	0.0202322	0.0245246	0.394381	0.177262	0.0767671	0.0210823	0.0652126	0.0127776	0.00722188	0.00647766	0.0237382
FCA_GND8103049_CCACCTACATGCCTAA	0.0156068	0.0197062	0.0134676	0.0172962	0.00530136	0.0239185	0.0101262	0.0192295	0.639067	0.0604683	0.00857853	0.00291831	0.00418591
FCA_GND8103049_CCACCTAGTCCAGTGC	0.153145	0.056433	0.0390057	0.0298255	0.257272	0.18979	0.0875618	0.0219571	0.0596307	0.0184386	0.00782617	0.00798697	0.0201308
FCA_GND8103049_CCACCTAGTGCACTTA	0.000179431	0.000261266	0.000774557	0.000275797	0.000888004	0.000119361	0.000151693	0.000191389	0.000187989	0.000184914	0.000480566	0.000538476	0.000461134
FCA_GND8103049_CCACCTAGTTGAACTC	0.00557862	0.00479385	0.00492821	0.00562992	0.00292622	0.00848202	0.00552337	0.069719	0.612997	0.165412	0.00346344	0.0029634	0.00219
FCA_GND8103049_CCACCTATCCACTGGG	0.0119253	0.005007	0.00624766	0.0136463	0.00437991	0.0131821	0.00987309	0.0572222	0.430535	0.343348	0.00720658	0.00507553	0.00422948
FCA_GND8103049_CCACGGAAGAGGGATA	0.0677173	0.0138527	0.00905673	0.0116339	0.00283662	0.0325205	0.0102685	0.0340888	0.654266	0.078567	0.00307582	0.00435002	0.00961857
FCA_GND8103049_CCACGGAAGCACCGTC	0.404304	0.0121945	0.00886271	0.0404862	0.00486787	0.23993	0.0879658	0.00450425	0.0391881	0.0032211	0.0034814	0.00293852	0.00508254
FCA_GND8103049_CCACGGAAGCTACCTA	0.00760782	0.00783494	0.00454111	0.0167846	0.00362374	0.0934515	0.00947864	0.00265707	0.00668457	0.00163229	0.00239141	0.00187349	0.0754448
FCA_GND8103049_CCACGGAAGGATGCGT	0.0422683	0.0328502	0.0113959	0.053942	0.00383696	0.16143	0.0249462	0.0128067	0.202305	0.0227805	0.02434	0.00568432	0.00870029
FCA_GND8103049_CCACGGAAGTCACGCC	0.0342032	0.0276806	0.0223432	0.0158852	0.58724	0.0867049	0.132984	0.00891999	0.0194544	0.00847236	0.00557387	0.00579841	0.0115942
FCA_GND8103049_CCACGGAGTAGGGTAC	0.0205442	0.0216663	0.0203045	0.00923613	0.0115272	0.0624235	0.0258827	0.0134033	0.535307	0.0157262	0.0063404	0.00467727	0.0138178
FCA_GND8103049_CCACGGAGTATCACCA	0.019564	0.00694916	0.00420263	0.0132349	0.00173031	0.0146409	0.0160482	0.0495486	0.761623	0.0167685	0.00560023	0.00272064	0.00256758
FCA_GND8103049_CCACGGAGTGACTCAT	0.543966	0.0161157	0.0137601	0.063292	0.00470644	0.0250156	0.252267	0.00892069	0.0180099	0.00325199	0.010251	0.00378299	0.00612071
FCA_GND8103049_CCACGGATCTTGAGGT	0.00202403	0.00155943	0.000695661	0.00315958	0.000217696	0.000718089	0.000913267	0.00051297	0.00107185	0.00111473	0.000709519	0.000927084	0.983432
FCA_GND8103049_CCACTACCAATGCCAT	0.0100686	0.00376665	0.00892391	0.00612145	0.00236536	0.00638916	0.0060258	0.100911	0.752224	0.0425981	0.0043147	0.00234944	0.00183737
FCA_GND8103049_CCACTACCAGTATCTG	0.00729795	0.00334761	0.00111628	0.00543528	0.000662434	0.00300216	0.00241006	0.00109786	0.00202461	0.00116557	0.000840861	0.00147305	0.962815
FCA_GND8103049_CCACTACGTACGACCC	0.0473644	0.0127998	0.0125259	0.0137513	0.0076801	0.0220839	0.0149421	0.120635	0.452685	0.137871	0.0084639	0.00703913	0.0157503
FCA_GND8103049_CCACTACGTTACGACT	0.00477505	0.00469622	0.00137453	0.00514525	0.00188536	0.0075613	0.00315852	0.00383404	0.00580078	0.00294326	0.00287044	0.00121545	0.0398844
FCA_GND8103049_CCACTACGTTCAACCA	0.101762	0.0637285	0.0342572	0.0325254	0.224124	0.190412	0.170237	0.0157865	0.0628029	0.0134483	0.00953873	0.00915388	0.0236899
FCA_GND8103049_CCAGCGAAGCTGAACG	0.288739	0.0651841	0.0308583	0.137572	0.00591111	0.206916	0.0974305	0.0107625	0.0355936	0.0113265	0.00818644	0.00585505	0.00829208
FCA_GND8103049_CCAGCGAAGTAATCCC	0.0167429	0.0240776	0.0173093	0.011504	0.746869	0.0314921	0.0753462	0.0108356	0.0137964	0.00603576	0.00581349	0.00525681	0.00681821
FCA_GND8103049_CCAGCGACAAGTACCT	0.00359569	0.0026653	0.00217303	0.00308186	0.000599122	0.00523289	0.00214436	0.0132719	0.920178	0.0099783	0.0010365	0.000939259	0.00158322
FCA_GND8103049_CCAGCGACACTATCTT	0.0189977	0.0160549	0.0102085	0.0138441	0.00311086	0.0271748	0.0190852	0.117693	0.643092	0.0444417	0.00491677	0.00257551	0.0103669
FCA_GND8103049_CCAGCGACATATACCG	0.0183941	0.0109963	0.00259926	0.0115892	0.00227871	0.00972313	0.00748777	0.00638036	0.0091442	0.0110669	0.00244874	0.00185657	0.831096
FCA_GND8103049_CCAGCGACATGCCTAA	0.0100114	0.0239361	0.0174717	0.0153097	0.681592	0.0367788	0.0974488	0.0106425	0.0323989	0.00606805	0.00544432	0.0068328	0.0105666
FCA_GND8103049_CCAGCGAGTAATTGGA	0.0343873	0.0156764	0.0142741	0.0506289	0.00325392	0.215782	0.0318423	0.00557976	0.0334258	0.00450277	0.00836624	0.00267312	0.0681161
FCA_GND8103049_CCAGCGAGTGTCTGAT	0.0270741	0.0544984	0.025808	0.0189818	0.355724	0.118634	0.271328	0.0141693	0.0362626	0.0117307	0.00778009	0.00573825	0.00900482
FCA_GND8103049_CCAGCGATCGGAATCT	0.0823099	0.192178	0.0478041	0.0391631	0.160854	0.117016	0.101554	0.0241798	0.0765012	0.013811	0.0145295	0.00934845	0.0355325
FCA_GND8103049_CCAGCGATCGGCTTGG	0.0489596	0.128037	0.0132853	0.0304178	0.208517	0.0501728	0.320037	0.0152979	0.0472788	0.0116816	0.00660463	0.009447	0.00771729
FCA_GND8103049_CCATGTCAGATCACGG	0.0081202	0.0092657	0.00397981	0.0128418	0.00157298	0.0262266	0.00606337	0.0133114	0.647829	0.0815306	0.00361191	0.00183013	0.0019516
FCA_GND8103049_CCATGTCAGCACCGCT	0.0650611	0.0262481	0.0173494	0.010927	0.0337675	0.552073	0.0920887	0.0145483	0.0684243	0.0167086	0.00608691	0.0046582	0.0112804
FCA_GND8103049_CCATGTCCAAGCGAGT	0.002322	0.00256227	0.00336723	0.00397056	0.00093357	0.0196945	0.00332142	0.0493589	0.638241	0.0205473	0.00344861	0.00160339	0.00975685
FCA_GND8103049_CCATGTCCACACCGCA	0.00903156	0.00385406	0.00144124	0.00725229	0.000760091	0.00363262	0.00211804	0.00253707	0.00415073	0.00227681	0.00219882	0.00138662	0.947707
FCA_GND8103049_CCATGTCGTACCGGCT	0.0844913	0.060973	0.0288483	0.0257743	0.183735	0.321254	0.066923	0.0219964	0.0856785	0.0121211	0.00760077	0.00809675	0.0220161
FCA_GND8103049_CCATGTCGTCACCTAA	0.042782	0.0595817	0.0244725	0.0253719	0.338604	0.24216	0.0901719	0.0201981	0.0556337	0.00805443	0.0063968	0.00618356	0.0155234
FCA_GND8103049_CCATGTCGTCTGCGGT	0.294921	0.0469422	0.0322834	0.0402899	0.00727891	0.101597	0.365958	0.00573063	0.0255833	0.00479365	0.00393835	0.00906366	0.0161723
FCA_GND8103049_CCATTCGAGGGCTTCC	0.00928452	0.00566212	0.00833305	0.00822988	0.00576225	0.00892944	0.00723794	0.0526382	0.732236	0.109874	0.00290589	0.00306638	0.00552751
FCA_GND8103049_CCATTCGAGGGTCGAT	0.0545476	0.021356	0.0106307	0.0297854	0.00373526	0.162234	0.0115121	0.0112167	0.15773	0.00936157	0.00495764	0.00393236	0.0108983
FCA_GND8103049_CCATTCGAGTAGCGGT	0.0295302	0.0351796	0.00985991	0.0162148	0.0168628	0.430142	0.391925	0.00361073	0.0199	0.00390882	0.00263898	0.00381487	0.00625979
FCA_GND8103049_CCATTCGCAATAACGA	0.00373244	0.00448908	0.00376636	0.00628416	0.00182938	0.0135543	0.00365543	0.0148156	0.535997	0.0112561	0.00929755	0.00143486	0.00221223
FCA_GND8103049_CCATTCGCAATCGGTT	0.052788	0.04532	0.0192186	0.0172114	0.453519	0.103209	0.102856	0.0230451	0.0547713	0.0162597	0.00737112	0.00825739	0.0249522
FCA_GND8103049_CCATTCGGTTCACCTC	0.00355438	0.00373701	0.00291286	0.00630864	0.0033182	0.188753	0.0118179	0.00104486	0.00381209	0.000851472	0.0013714	0.00136834	0.014857
FCA_GND8103049_CCATTCGTCCAAACTG	0.0273435	0.0142731	0.00986924	0.0437275	0.00503207	0.0652044	0.00571146	0.0317467	0.522635	0.0157592	0.00962966	0.00306331	0.00451978
FCA_GND8103049_CCATTCGTCCGATATG	0.119577	0.0206711	0.0126214	0.0224553	0.00580879	0.015244	0.0136868	0.124877	0.495686	0.0187822	0.00602026	0.00510412	0.00933647
FCA_GND8103049_CCATTCGTCCGCATCT	0.0218099	0.0221012	0.00693856	0.0134642	0.00235409	0.119539	0.0149074	0.0101318	0.694561	0.0118466	0.00365838	0.00284391	0.00494955
FCA_GND8103049_CCATTCGTCGCGATCG	0.00526953	0.00532648	0.00408627	0.00881152	0.0017367	0.0112202	0.00449072	0.0319057	0.744421	0.0620087	0.01035	0.00159171	0.00259342
FCA_GND8103049_CCCAATCAGTGAACAT	0.0123235	0.0149149	0.00367699	0.00998108	0.00160225	0.107957	0.00436012	0.00437453	0.0166475	0.00168616	0.00354047	0.00257937	0.0463575
FCA_GND8103049_CCCAATCCAATACGCT	0.011005	0.0111607	0.0161658	0.0132215	0.0070794	0.0215612	0.0129015	0.0989829	0.353521	0.216335	0.0258019	0.00592673	0.0138286
FCA_GND8103049_CCCAATCCACACAGAG	0.0575994	0.0486758	0.0201392	0.0860041	0.291407	0.109155	0.244378	0.0154161	0.0302166	0.0113845	0.0073258	0.00700992	0.0220364
FCA_GND8103049_CCCAATCCAGGTCCAC	0.12009	0.00950736	0.00364793	0.119384	0.00223522	0.0058935	0.682377	0.00205327	0.00271558	0.00111177	0.00133244	0.00431127	0.00141259
FCA_GND8103049_CCCAATCGTAAATGAC	0.00642289	0.00592388	0.00350967	0.00702814	0.000897707	0.0272402	0.00771015	0.0614114	0.273433	0.0103026	0.0100728	0.00171941	0.00261123
FCA_GND8103049_CCCAATCGTGACTCAT	0.0213686	0.0159759	0.0136364	0.0222462	0.00714386	0.0295516	0.0207563	0.110199	0.307443	0.283626	0.0179321	0.0079928	0.0133091
[truncated: 17,539 more rows]

## Sheet: 3_macrophages_TFs_dorothea
	ADNP	AHR	AR	ARID2	ARID3A	ARNT	ARNTL	ASCL1	ATF1	ATF2	ATF3	ATF4	ATF6	ATF7	BACH1	BACH2	BATF	BCL11A	BCL6	BHLHE22	BHLHE40	BPTF	BRF2	CBX2	CDX1	CDX2	CEBPA	CEBPB	CEBPD	CEBPE	CEBPG	CEBPZ	CLOCK	CREB1	CREB3	CREB3L1	CREB5	CREM	CTCF	CTCFL	CUX1	CXXC4	DDIT3	DEAF1	DNMT1	DR1	DUX4	E2F1	E2F2
ifn-induced mac	-0.199904	-0.237656	0.23225	-0.135961	-0.175121	-0.0259395	-0.220229	-0.444791	0.198617	-0.253227	0.0168486	-0.316723	-0.31624	-0.239422	0.131614	-0.277025	0.19673	0.225794	0.0976118	-0.0548748	-0.0160183	-0.159537	0.000434214	-0.341135	-0.12753	-0.352234	0.0696334	-0.219847	0.103951	-0.231974	-0.173869	0.229356	-0.22042	0.25981	0.286353	-0.166337	-0.361253	-0.0797811	-0.0581375	-0.102826	-0.0772712	-0.197427	-0.36958	0.0195023	-0.0836592	-0.157587	-0.247069	-0.158068	-0.128956
microglia-like mac	-0.279861	-0.248389	0.073444	-0.205281	-0.504018	-0.386426	-0.423588	-0.398346	-0.0767683	-0.199097	0.42108	-0.550036	-0.298616	-0.129382	-0.502149	-0.429999	-0.0130403	-0.131137	0.436316	-0.0558311	0.162089	-0.13703	0.234629	-0.618768	-0.342798	-0.656076	0.161846	-0.21715	0.908098	0.548994	-0.271715	0.376535	-0.430332	-0.473551	0.0773179	-0.0308728	0.251979	-0.392679	-0.0842368	-0.0587303	0.0344563	-0.0959189	-0.265514	0.00138097	0.51797	-0.241534	-0.564063	0.0215909	0.215666
SIGLEC15+ mac	-0.625483	-0.446098	0.618742	0.108582	-0.730757	-0.383941	-0.556385	-0.418861	-0.737834	-1.30725	0.771635	-1.21873	-0.233344	-0.579735	0.244317	-0.843885	-0.959085	-0.284861	0.827921	0.17462	0.707203	-0.392612	1.07434	-1.41393	0.144953	-0.615797	-1.09278	-1.3152	-0.443355	-1.03231	-0.471449	1.5396	-0.800993	-0.773079	0.226665	0.207605	-0.158422	-0.288361	-0.173788	-0.479871	0.686494	0.253897	-0.138728	0.746814	1.09023	-0.528438	0.251265	-0.626849	-0.0678506
tissue-repair mac	0.0572901	0.0489455	-0.0430382	0.0170286	0.0774779	0.046742	0.0660237	0.0686564	0.0283561	0.083158	-0.0656543	0.108592	0.0471844	0.0458799	0.020948	0.0815632	0.0332212	0.0116065	-0.0729888	-0.000799187	-0.0419338	0.0346521	-0.0639875	0.123307	0.0253702	0.0921601	0.0318099	0.0832989	-0.0537484	0.0142394	0.0488162	-0.105374	0.0770992	0.0567596	-0.0289208	0.00109921	0.00478808	0.0455922	0.0165242	0.0299102	-0.028622	0.0054231	0.0431038	-0.0332564	-0.0819877	0.0482566	0.0429296	0.0328109	-0.00722352
[truncated: 312 more columns]

## Sheet: 4_GO_BP_tissue-repair
native	p_value	term_size	intersection_size	recall	name
GO:0009987	5.71072e-19	15853	98	0.0061818	cellular process
GO:0008150	3.19338e-17	16644	98	0.00588801	biological_process
GO:0050896	6.58511e-15	8621	73	0.0084677	response to stimulus
GO:0007165	2.17201e-13	5738	58	0.0101081	signal transduction
GO:0002376	2.17201e-13	3046	43	0.0141169	immune system process
GO:0051716	4.29299e-13	7138	64	0.0089661	cellular response to stimulus
GO:0065007	1.19257e-12	11815	81	0.00685569	biological regulation
GO:0050794	4.48587e-12	10587	76	0.00717862	regulation of cellular process
GO:0023052	5.87512e-12	6231	58	0.0093083	signaling
GO:0007154	5.95752e-12	6247	58	0.00928446	cell communication
GO:0048518	2.46113e-11	6029	56	0.00928844	positive regulation of biological process
GO:0048522	2.99793e-11	5451	53	0.00972299	positive regulation of cellular process
GO:0016192	4.86881e-11	2114	33	0.0156102	vesicle-mediated transport
GO:0050789	5.45816e-11	11126	76	0.00683085	regulation of biological process
GO:0030155	2.23275e-10	714	20	0.0280112	regulation of cell adhesion
GO:0048583	2.31085e-10	4028	44	0.0109235	regulation of response to stimulus
GO:0007166	2.54092e-10	3026	38	0.0125578	cell surface receptor signaling pathway
GO:0001775	8.5889e-10	1429	26	0.0181945	cell activation
GO:0006950	1.28533e-09	3890	42	0.0107969	response to stress
GO:0006955	1.38356e-09	2133	31	0.0145335	immune response
GO:0051179	2.63188e-09	6592	55	0.00834345	localization
GO:0007155	5.34069e-09	1439	25	0.0173732	cell adhesion
GO:0022610	5.58176e-09	1445	25	0.017301	biological adhesion
GO:0009966	1.32722e-08	2984	35	0.0117292	regulation of signal transduction
GO:0035556	1.32722e-08	2661	33	0.0124014	intracellular signal transduction
GO:0045321	1.52722e-08	1274	23	0.0180534	leukocyte activation
GO:0006898	1.89175e-08	321	13	0.0404984	receptor-mediated endocytosis
GO:0006810	1.89175e-08	5050	46	0.00910891	transport
GO:0009893	3.37656e-08	3623	38	0.0104885	positive regulation of metabolic process
GO:1902531	4.28398e-08	1748	26	0.0148741	regulation of intracellular signal transduction
GO:0051234	4.41184e-08	5191	46	0.00886149	establishment of localization
GO:0051094	5.23116e-08	1247	22	0.0176423	positive regulation of developmental process
GO:0002263	5.68052e-08	701	17	0.0242511	cell activation involved in immune response
GO:0010646	5.8016e-08	3357	36	0.0107239	regulation of cell communication
GO:0023051	7.5108e-08	3392	36	0.0106132	regulation of signaling
GO:0048519	9.04974e-08	5325	46	0.0086385	negative regulation of biological process
GO:0008152	9.59333e-08	11102	70	0.00630517	metabolic process
GO:0042221	2.61966e-07	4304	40	0.00929368	response to chemical
GO:0065008	3.41218e-07	3967	38	0.00957903	regulation of biological quality
GO:0002366	3.47804e-07	697	16	0.0229555	leukocyte activation involved in immune response
GO:0006954	3.53363e-07	699	16	0.0228898	inflammatory response
GO:0022407	3.73116e-07	425	13	0.0305882	regulation of cell-cell adhesion
GO:0045785	3.96351e-07	428	13	0.0303738	positive regulation of cell adhesion
GO:0050790	4.05254e-07	2442	29	0.0118755	regulation of catalytic activity
GO:0048523	4.14568e-07	4790	42	0.00876827	negative regulation of cellular process
GO:0031325	5.66605e-07	3154	33	0.0104629	positive regulation of cellular metabolic process
GO:0010604	5.86433e-07	3337	34	0.0101888	positive regulation of macromolecule metabolic process
GO:0019222	9.65456e-07	6643	50	0.00752672	regulation of metabolic process
GO:0044237	9.75131e-07	10320	65	0.00629845	cellular metabolic process
GO:0050793	1.02515e-06	2401	28	0.0116618	regulation of developmental process
GO:0071704	1.02515e-06	10613	66	0.00621879	organic substance metabolic process
GO:0006897	1.02515e-06	661	15	0.0226929	endocytosis
GO:0065009	1.06359e-06	3078	32	0.0103964	regulation of molecular function
GO:0048513	1.13716e-06	3444	34	0.00987224	animal organ development
GO:1903037	1.40196e-06	319	11	0.0344828	regulation of leukocyte cell-cell adhesion
GO:0043170	1.45677e-06	9143	60	0.0065624	macromolecule metabolic process
GO:0044093	2.30323e-06	1728	23	0.0133102	positive regulation of molecular function
GO:0070887	2.42281e-06	3198	32	0.0100063	cellular response to chemical stimulus
GO:0010033	3.12636e-06	3235	32	0.00989181	response to organic substance
GO:0009605	3.53639e-06	2730	29	0.0106227	response to external stimulus
GO:0007159	3.69031e-06	355	11	0.0309859	leukocyte cell-cell adhesion
GO:0032501	3.69031e-06	7185	51	0.00709812	multicellular organismal process
GO:0006909	3.84387e-06	357	11	0.0308123	phagocytosis
GO:0044419	4.25593e-06	2105	25	0.0118765	biological process involved in interspecies interaction between organisms
GO:0098609	4.51209e-06	868	16	0.0184332	cell-cell adhesion
GO:0008219	4.64739e-06	2118	25	0.0118036	cell death
GO:0071310	5.21203e-06	2623	28	0.0106748	cellular response to organic substance
GO:0051173	5.40246e-06	2974	30	0.0100874	positive regulation of nitrogen compound metabolic process
GO:0030097	5.44811e-06	884	16	0.0180995	hemopoiesis
GO:0032502	6.20555e-06	6189	46	0.00743254	developmental process
GO:0034097	6.20555e-06	1142	18	0.0157618	response to cytokine
GO:0002696	6.25221e-06	380	11	0.0289474	positive regulation of leukocyte activation
GO:0048731	6.25221e-06	4713	39	0.00827498	system development
GO:0010941	7.04588e-06	1568	21	0.0133929	regulation of cell death
GO:0050867	7.64996e-06	389	11	0.0282776	positive regulation of cell activation
GO:1903039	7.93962e-06	233	9	0.0386266	positive regulation of leukocyte cell-cell adhesion
GO:0048534	8.51813e-06	922	16	0.0173536	hematopoietic or lymphoid organ development
GO:0048585	8.51813e-06	1591	21	0.0131992	negative regulation of response to stimulus
GO:0007167	8.65479e-06	1048	17	0.0162214	enzyme linked receptor protein signaling pathway
GO:0048584	9.1842e-06	2217	25	0.0112765	positive regulation of response to stimulus
GO:0071345	9.39508e-06	1056	17	0.0160985	cellular response to cytokine stimulus
GO:0044260	9.71181e-06	7928	53	0.00668517	cellular macromolecule metabolic process
GO:0042592	1.00898e-05	1915	23	0.0120104	homeostatic process
GO:0007275	1.0795e-05	5250	41	0.00780952	multicellular organism development
GO:0006952	1.12072e-05	1626	21	0.0129151	defense response
GO:0050865	1.2277e-05	610	13	0.0213115	regulation of cell activation
GO:0007169	1.24114e-05	720	14	0.0194444	transmembrane receptor protein tyrosine kinase signaling pathway
GO:0071621	1.3384e-05	124	7	0.0564516	granulocyte chemotaxis
GO:0051240	1.44873e-05	1367	19	0.013899	positive regulation of multicellular organismal process
GO:0002520	1.5565e-05	975	16	0.0164103	immune system development
GO:0051251	1.61527e-05	339	10	0.0294985	positive regulation of lymphocyte activation
GO:0043085	1.70906e-05	1385	19	0.0137184	positive regulation of catalytic activity
GO:0023056	2.33719e-05	1710	21	0.0122807	positive regulation of signaling
GO:0072583	2.46388e-05	46	5	0.108696	clathrin-dependent endocytosis
GO:0022409	2.63225e-05	276	9	0.0326087	positive regulation of cell-cell adhesion
GO:0070098	2.70524e-05	87	6	0.0689655	chemokine-mediated signaling pathway
GO:0060255	2.76884e-05	6115	44	0.00719542	regulation of macromolecule metabolic process
GO:1901701	3.18923e-05	1169	17	0.0145423	cellular response to oxygen-containing compound
GO:0002694	3.57759e-05	570	12	0.0210526	regulation of leukocyte activation
GO:0050870	3.68655e-05	213	8	0.0375587	positive regulation of T cell activation

## Sheet: 5_GO_BP_ifn-induced
native	p_value	term_size	intersection_size	recall	name
GO:0006955	4.05342e-35	2133	57	0.0267229	immune response
GO:0002376	2.01231e-30	3046	60	0.019698	immune system process
GO:0006952	1.40214e-24	1626	43	0.0264453	defense response
GO:0098542	4.55896e-24	1107	37	0.0334237	defense response to other organism
GO:0044419	1.98952e-23	2105	46	0.0218527	biological process involved in interspecies interaction between organisms
GO:0043207	2.25528e-22	1453	39	0.026841	response to external biotic stimulus
GO:0045087	2.25528e-22	913	33	0.0361446	innate immune response
GO:0051707	2.25528e-22	1451	39	0.026878	response to other organism
GO:0009607	3.88798e-22	1485	39	0.0262626	response to biotic stimulus
GO:0034097	1.12219e-21	1142	35	0.030648	response to cytokine
GO:0071345	1.55527e-20	1056	33	0.03125	cellular response to cytokine stimulus
GO:0019221	2.54679e-20	746	29	0.038874	cytokine-mediated signaling pathway
GO:0006950	7.22769e-18	3890	52	0.0133676	response to stress
GO:0034341	4.42686e-17	194	17	0.0876289	response to interferon-gamma
GO:0002682	9.53168e-17	1529	34	0.0222368	regulation of immune system process
GO:0009605	1.64403e-16	2730	43	0.0157509	response to external stimulus
GO:0050776	1.90826e-15	949	27	0.028451	regulation of immune response
GO:0050896	1.00034e-14	8621	70	0.00811971	response to stimulus
GO:0060333	3.43992e-14	88	12	0.136364	interferon-gamma-mediated signaling pathway
GO:0002252	1.73979e-13	1254	28	0.0223285	immune effector process
GO:0071346	1.73979e-13	174	14	0.0804598	cellular response to interferon-gamma
GO:0007166	2.28442e-13	3026	41	0.0135492	cell surface receptor signaling pathway
GO:0070887	2.48699e-13	3198	42	0.0131332	cellular response to chemical stimulus
GO:0010033	3.5778e-13	3235	42	0.012983	response to organic substance
GO:0071310	4.09145e-13	2623	38	0.0144872	cellular response to organic substance
GO:0045088	8.61699e-13	302	16	0.0529801	regulation of innate immune response
GO:0002831	4.91686e-12	404	17	0.0420792	regulation of response to biotic stimulus
GO:0060337	2.52738e-11	82	10	0.121951	type I interferon signaling pathway
GO:0071357	2.76659e-11	83	10	0.120482	cellular response to type I interferon
GO:0034340	4.3489e-11	87	10	0.114943	response to type I interferon
GO:0042221	4.78653e-11	4304	45	0.0104554	response to chemical
GO:0051716	9.01409e-11	7138	58	0.00812553	cellular response to stimulus
GO:0048583	1.01589e-10	4028	43	0.0106753	regulation of response to stimulus
GO:0019882	1.1673e-10	231	13	0.0562771	antigen processing and presentation
GO:0065007	1.61894e-10	11815	75	0.00634786	biological regulation
GO:0002833	2.39552e-10	246	13	0.0528455	positive regulation of response to biotic stimulus
GO:0048519	2.39552e-10	5325	49	0.00920188	negative regulation of biological process
GO:0002479	3.09432e-10	74	9	0.121622	antigen processing and presentation of exogenous peptide antigen via MHC class I, TAP-dependent
GO:0002684	3.23639e-10	1018	22	0.021611	positive regulation of immune system process
GO:0042590	5.39626e-10	79	9	0.113924	antigen processing and presentation of exogenous peptide antigen via MHC class I
GO:0045089	7.22957e-10	213	12	0.056338	positive regulation of innate immune response
GO:0007165	8.60877e-10	5738	50	0.00871384	signal transduction
GO:0019884	2.15816e-09	180	11	0.0611111	antigen processing and presentation of exogenous antigen
GO:0008150	2.27287e-09	16644	87	0.00522711	biological_process
GO:0048584	2.55459e-09	2217	30	0.0135318	positive regulation of response to stimulus
GO:0050778	2.59388e-09	714	18	0.0252101	positive regulation of immune response
GO:0051607	3.00766e-09	244	12	0.0491803	defense response to virus
GO:0140546	3.00766e-09	244	12	0.0491803	defense response to symbiont
GO:0002474	3.19012e-09	98	9	0.0918367	antigen processing and presentation of peptide antigen via MHC class I
GO:0031347	3.30475e-09	633	17	0.0268562	regulation of defense response
GO:0023052	4.14712e-09	6231	51	0.00818488	signaling
GO:0007154	4.48803e-09	6247	51	0.00816392	cell communication
GO:0050789	5.53266e-09	11126	70	0.00629157	regulation of biological process
GO:0009615	7.11461e-09	333	13	0.039039	response to virus
GO:0009987	9.77604e-09	15853	84	0.00529868	cellular process
GO:0045321	1.62726e-08	1274	22	0.0172684	leukocyte activation
GO:0048518	1.62726e-08	6029	49	0.00812738	positive regulation of biological process
GO:0002478	2.10963e-08	172	10	0.0581395	antigen processing and presentation of exogenous peptide antigen
GO:0001775	2.28059e-08	1429	23	0.0160952	cell activation
GO:0080134	3.75488e-08	1336	22	0.0164671	regulation of response to stress
GO:0032101	3.98492e-08	974	19	0.0195072	regulation of response to external stimulus
GO:0034612	4.04005e-08	313	12	0.0383387	response to tumor necrosis factor
GO:0048002	4.86541e-08	189	10	0.0529101	antigen processing and presentation of peptide antigen
GO:0032103	6.07064e-08	487	14	0.0287474	positive regulation of response to external stimulus
GO:0048523	6.48584e-08	4790	42	0.00876827	negative regulation of cellular process
GO:0050794	7.22828e-08	10587	66	0.00623406	regulation of cellular process
GO:0031349	9.50622e-08	340	12	0.0352941	positive regulation of defense response
GO:0071356	2.05862e-07	289	11	0.0380623	cellular response to tumor necrosis factor
GO:0006954	7.16013e-07	699	15	0.0214592	inflammatory response
GO:0002250	7.29167e-07	597	14	0.0234506	adaptive immune response
GO:0048522	9.03047e-07	5451	43	0.00788846	positive regulation of cellular process
GO:0046649	1.17064e-06	728	15	0.0206044	lymphocyte activation
GO:0070555	1.47763e-06	205	9	0.0439024	response to interleukin-1
GO:0035556	2.16381e-06	2661	28	0.0105224	intracellular signal transduction
GO:0009308	3.90135e-06	165	8	0.0484848	amine metabolic process
GO:0033209	3.98105e-06	166	8	0.0481928	tumor necrosis factor-mediated signaling pathway
GO:0042127	3.98105e-06	1604	21	0.0130923	regulation of cell population proliferation
GO:0016032	4.04742e-06	926	16	0.0172786	viral process
GO:0002764	4.19913e-06	487	12	0.0246407	immune response-regulating signaling pathway
GO:0051239	5.40853e-06	2614	27	0.010329	regulation of multicellular organismal process
GO:0071347	7.04432e-06	180	8	0.0444444	cellular response to interleukin-1
GO:0065008	7.20972e-06	3967	34	0.00857071	regulation of biological quality
GO:0002520	7.61309e-06	975	16	0.0164103	immune system development
GO:0044403	7.94596e-06	979	16	0.0163432	biological process involved in symbiotic interaction
GO:0050792	8.27525e-06	185	8	0.0432432	regulation of viral process
GO:0009617	1.04076e-05	642	13	0.0202492	response to bacterium
GO:0008283	1.04076e-05	1869	22	0.011771	cell population proliferation
GO:0051279	1.04076e-05	80	6	0.075	regulation of release of sequestered calcium ion into cytosol
GO:0030097	1.15149e-05	884	15	0.0169683	hemopoiesis
GO:0043903	1.16663e-05	195	8	0.0410256	regulation of biological process involved in symbiotic interaction
GO:0031145	1.25356e-05	83	6	0.0722892	anaphase-promoting complex-dependent catabolic process
GO:0046651	1.37105e-05	274	9	0.0328467	lymphocyte proliferation
GO:0032943	1.48534e-05	277	9	0.032491	mononuclear cell proliferation
GO:0048525	1.71809e-05	88	6	0.0681818	negative regulation of viral process
GO:0002218	1.75567e-05	142	7	0.0492958	activation of innate immune response
GO:0048534	1.81162e-05	922	15	0.016269	hematopoietic or lymphoid organ development
GO:0001817	1.94643e-05	685	13	0.0189781	regulation of cytokine production
GO:0051179	2.09512e-05	6592	45	0.00682646	localization
GO:0002768	2.54603e-05	484	11	0.0227273	immune response-regulating cell surface receptor signaling pathway
GO:0002683	2.55423e-05	387	10	0.0258398	negative regulation of immune system process

## Sheet: 6_GO_BP_microglia-like
native	p_value	term_size	intersection_size	recall	name
GO:0008150	1.2891e-08	16644	89	0.00534727	biological_process
GO:0050896	4.83568e-08	8621	62	0.00719174	response to stimulus
GO:0006952	4.83568e-08	1626	26	0.0159902	defense response
GO:0002376	6.76159e-08	3046	35	0.0114905	immune system process
GO:0009987	8.99293e-08	15853	85	0.00536176	cellular process
GO:0007165	1.66627e-07	5738	48	0.00836528	signal transduction
GO:0065007	1.66627e-07	11815	72	0.00609395	biological regulation
GO:0048584	1.66627e-07	2217	29	0.0130807	positive regulation of response to stimulus
GO:0051716	1.66842e-07	7138	54	0.00756514	cellular response to stimulus
GO:0023052	1.66842e-07	6231	50	0.00802439	signaling
GO:0007154	1.66842e-07	6247	50	0.00800384	cell communication
GO:0032501	1.79378e-07	7185	54	0.00751566	multicellular organismal process
GO:0006950	2.63555e-07	3890	38	0.00976864	response to stress
GO:0048583	6.24417e-07	4028	38	0.00943396	regulation of response to stimulus
GO:0006955	6.24417e-07	2133	27	0.0126582	immune response
GO:0006954	6.24417e-07	699	16	0.0228898	inflammatory response
GO:0050789	6.37191e-07	11126	68	0.00611181	regulation of biological process
GO:0007166	1.0495e-06	3026	32	0.010575	cell surface receptor signaling pathway
GO:0002682	2.1906e-06	1529	22	0.0143885	regulation of immune system process
GO:0001775	3.30032e-06	1429	21	0.0146956	cell activation
GO:0031347	7.32905e-06	633	14	0.0221169	regulation of defense response
GO:0032612	1.08024e-05	102	7	0.0686275	interleukin-1 production
GO:0048518	1.09537e-05	6029	45	0.00746392	positive regulation of biological process
GO:0070887	1.12839e-05	3198	31	0.00969356	cellular response to chemical stimulus
GO:0050794	1.57196e-05	10587	63	0.00595069	regulation of cellular process
GO:0050727	1.93057e-05	312	10	0.0320513	regulation of inflammatory response
GO:0040011	4.95846e-05	1870	22	0.0117647	locomotion
GO:0032651	4.95846e-05	82	6	0.0731707	regulation of interleukin-1 beta production
GO:0045321	4.95846e-05	1274	18	0.0141287	leukocyte activation
GO:0002274	5.03127e-05	650	13	0.02	myeloid leukocyte activation
GO:0002684	5.33802e-05	1018	16	0.0157171	positive regulation of immune system process
GO:0032611	6.389e-05	87	6	0.0689655	interleukin-1 beta production
GO:0046903	7.09308e-05	1465	19	0.0129693	secretion
GO:0032940	8.01362e-05	1334	18	0.0134933	secretion by cell
GO:0016192	8.14217e-05	2114	23	0.0108798	vesicle-mediated transport
GO:0016477	8.99984e-05	1501	19	0.0126582	cell migration
GO:0032652	8.99984e-05	95	6	0.0631579	regulation of interleukin-1 production
GO:0002263	8.99984e-05	701	13	0.0185449	cell activation involved in immune response
GO:0002366	8.99984e-05	697	13	0.0186514	leukocyte activation involved in immune response
GO:0050776	9.0949e-05	949	15	0.0158061	regulation of immune response
GO:0032691	9.19984e-05	23	4	0.173913	negative regulation of interleukin-1 beta production
GO:1904141	0.000107983	7	3	0.428571	positive regulation of microglial cell migration
GO:0140352	0.00010823	1385	18	0.0129964	export from cell
GO:0032502	0.000110094	6189	43	0.00694781	developmental process
GO:0032101	0.000111478	974	15	0.0154004	regulation of response to external stimulus
GO:0051241	0.000116569	981	15	0.0152905	negative regulation of multicellular organismal process
GO:0002252	0.000116569	1254	17	0.0135566	immune effector process
GO:0042221	0.000134034	4304	34	0.00789963	response to chemical
GO:0034382	0.000134034	8	3	0.375	chylomicron remnant clearance
GO:0032787	0.000134034	625	12	0.0192	monocarboxylic acid metabolic process
GO:0071830	0.000134034	8	3	0.375	triglyceride-rich lipoprotein particle clearance
GO:1904139	0.000134034	8	3	0.375	regulation of microglial cell migration
GO:1904124	0.000134034	8	3	0.375	microglial cell migration
GO:0009611	0.000134034	626	12	0.0191693	response to wounding
GO:0042127	0.000162688	1604	19	0.0118454	regulation of cell population proliferation
GO:0002253	0.000167192	535	11	0.0205607	activation of immune response
GO:0032692	0.000168711	29	4	0.137931	negative regulation of interleukin-1 production
GO:0071310	0.000168711	2623	25	0.00953107	cellular response to organic substance
GO:0065008	0.000168711	3967	32	0.00806655	regulation of biological quality
GO:0051179	0.000172271	6592	44	0.00667476	localization
GO:0002275	0.000173764	542	11	0.0202952	myeloid cell activation involved in immune response
GO:0034447	0.000174659	9	3	0.333333	very-low-density lipoprotein particle clearance
GO:0048856	0.000203415	5726	40	0.00698568	anatomical structure development
GO:0002429	0.000206958	449	10	0.0222717	immune response-activating cell surface receptor signaling pathway
[truncated: 36 more rows]

## Sheet: 7_GO_BP_SIGLEC15+
native	p_value	term_size	intersection_size	recall	name
[truncated: 100 more rows]

[truncated: 1 more sheets: 8_myeloid_multiOrgan_tfidf]
